# Supplementary material
Source: MDPI journal article supplement (https://www.mdpi.com/search?q=sustainability-10-03567)
Supplement: s001 [file sustainability-10-03567-s001.pdf]

FN Clarivate Analytics Web of Science

VR 1.0

PT J

AU Wilson, C

Dowlatabadi, H

AF Wilson, Charlie

Dowlatabadi, Hadi

TI Models of decision making and residential energy use

SO ANNUAL REVIEW OF ENVIRONMENT AND RESOURCES

SE Annual Review of Environment and Resources

LA English

DT Review; Book Chapter

DE economics; energy demand; psychology; sociology

ID UTILITY CONSERVATION PROGRAMS; ENVIRONMENTAL CONCERN; BEHAVIORAL

ECONOMICS; PROSPECT-THEORY; UNITED-STATES; LIFE-STYLE;

PSYCHOLOGICAL-RESEARCH; BOUNDED RATIONALITY; PLANNED BEHAVIOR; CARBON EMISSIONS

AB Research traditions across the social sciences have explored the drivers of individual behavior and proposed different models of decision making. Four diverse perspectives are reviewed here: conventional and behavioral economics, technology adoption theory and attitude-based decision making, social and environmental psychology, and sociology. The individual decision models in these traditions differ axiomatically. Some are founded on informed rationality or psychological variables, and others emphasize physical or contextual factors from individual to social scales. Each perspective suggests particular lessons for designing interventions to change behavior. Throughout the review, these lessons are applied to decisions affecting residential energy use. Examples are drawn from both intuitive and reasoning-based types of decision as well as from a range of decision contexts that include capital investments in weatherization and repetitive behaviors such as appliance use. Areas of difference and similarity between various theoretical approaches and their practical implications are highlighted. Conclusions are drawn on how to develop a more integrated approach to both behavioral research and intervention design in a residential energy context.

C1 Univ British Columbia, Inst Resources Environm & Sustainabil, Vancouver, BC V6T 1Z4, Canada.

RP Wilson, C (reprint author), Univ British Columbia, Inst Resources Environm & Sustainabil, Vancouver, BC V6T 1Z4, Canada.

EM cwilson@ires.ubc.ca; hadi.d@ubc.ca

RI feng, tingting/A-9545-2012; Wilson, Charlie/D-4127-2011

OI Wilson, Charlie/0000-0001-8164-3566

CR ABELL P, 2003, SOCIO-ECON REV, V1, P1, DOI 10.1093/SOCECO/1.1.1

AJZEN I, 1991, ORGAN BEHAV HUM DEC, V50, P179, DOI 10.1016/0749-5978(91)90020-T

AJZEN I, 1986, J EXP SOC PSYCHOL, V22, P453, DOI 10.1016/0022-1031(86)90045-4

AMANN JT, 2006, AO61 AM COUNC EN EFF

Archer D, 1987, ENERGY EFFICIENCY PE, P69

Ariely D, 2003, Q J ECON, V118, P73, DOI 10.1162/00335530360535153

Armitage CJ, 2001, BRIT J SOC PSYCHOL, V40, P471, DOI 10.1348/014466601164939

BANDURA A, 1991, ORGAN BEHAV HUM DEC, V50, P248, DOI 10.1016/0749-5978(91)90022-L

BANDURA A, 1977, PSYCHOL REV, V84, P191, DOI 10.1037//0033-295X.84.2.191

BARON J, 2004, THINKING DECIDING

BECKER LJ, 1978, J APPL PSYCHOL, V63, P428, DOI 10.1037/0021-9010.63.4.428

BECKER LJ, 1981, ENVIRON BEHAV, V13, P590, DOI 10.1177/0013916581135004

Benders RMT, 2006, ENER POLICY, V34, P3612, DOI 10.1016/j.enpol.2005.08.005

Bin S, 2005, ENER POLICY, V33, P197, DOI 10.1016/S0301-4215(03)00210-6

BLACK JS, 1985, J APPL PSYCHOL, V70, P3, DOI 10.1037//0021-9010.70.1.3

Boonekamp PGM, 2006, ENERGY, V31, P2848, DOI 10.1016/j.energy.2006.01.004

Brennan TJ, 2007, ENER POLICY, V35, P1616, DOI 10.1016/j.enpol.2006.04.023

Brewer G. D., 2005, DECISION MAKING ENV

BROWN MA, 1984, TECHNOL FORECAST SOC, V25, P123, DOI 10.1016/0040-1625(84)90087-8

Brown MA, 1998, ANNU REV ENER ENV, V23, P287, DOI 10.1146/annurev.energy.23.1.287

Brown MA, 2001, ENER POLICY, V29, P1197, DOI 10.1016/S0301-4215(01)00067-2

- BUCHANAN JM, 1994, J INST THEOR ECON, V150, P123
- Camerer CF, 2004, ROUNDTABLE SER BEHAV, P1
- Camerer C, 2003, U PENN LAW REV, V151, P1211, DOI 10.2307/3312889
- Camerer CF, 2004, ROUNDTABLE SER BEHAV, P148
- Camerer CF, 2004, ROUNDTABLE SER BEHAV, P3
- Clemen R. T., 2001, MAKING HARD DECISION
- Conlisk J, 1996, J ECON LIT, V34, P669
- Constanzo M., 1986, AM PSYCHOL, V41, P521
- CRAIG CS, 1978, J CONSUM RES, V5, P82, DOI 10.1086/208718
- Darby S, 2006, ENERG POLICY, V34, P2929, DOI 10.1016/j.enpol.2005.04.013
- DARLEY JM, 1981, J SOC ISSUES, V37, P150, DOI 10.1111/j.1540-4560.1981.tb02630.x
- Dawnay E., 2005, BEHAV EC 7 PRINCIPLE
- DENNIS ML, 1990, AM PSYCHOL, V45, P1109, DOI 10.1037/0003-066X.45.10.1109
- DICLEMENTE CC, 1982, ADDICT BEHAV, V7, P133, DOI 10.1016/0306-4603(82)90038-7
- Dietz T, 2005, ANNU REV ENV RESOUR, V30, P335, DOI 10.1146/annurev.energy.30.050504.144444
- Dietz T, 1998, ENVIRON BEHAV, V30, P450, DOI 10.1177/001391659803000402
- Dietz T., 2002, NEW TOOLS ENV PROTEC
- DILLMAN DA, 1983, J ECON PSYCHOL, V3, P299, DOI 10.1016/0167-4870(83)90008-9
- Egmond C, 2006, ENERG POLICY, V34, P3464, DOI 10.1016/j.enpol.2005.07.017
- \*EPRI, 1990, EM5908 EL POW RES I
- Faiers A, 2006, ENERG POLICY, V34, P1797, DOI 10.1016/j.enpol.2005.01.001
- Farhar B., 1989, SERITR2543386
- Buhrmann J., 1998, NRELTP55024004
- FARHAR BC, 2000, NRELTP55028872
- Festinger Leon, 1989, EXTENDING PSYCHOL FR
- Festinger L, 1957, THEORY COGNITIVE DIS
- Finucane ML, 2000, J BEHAV DECIS MAKING, V13, P1, DOI 10.1002/(SICI)1099-0771(200001/03)13:1<1::AID-BDM333>3.0.CO;2-S
- Fischhoff B, 2005, HEALTH PSYCHOL, V24, pS9, DOI 10.1037/0278-6133.24.4.S9
- Fischhoff B., 2005, HDB ENV EC, P937
- Fishbein M., 1975, BELIEF ATTITUDE INTE
- Frederick S, 2002, J ECON LIT, V40, P351, DOI 10.1257/002205102320161311
- Frey BS, 2004, J INST THEOR ECON, V160, P377, DOI 10.1628/0932456041960560
- Gardner G.T., 1996, ENV PROBLEMS HUMAN B
- Gatersleben B, 2002, ENVIRON BEHAV, V34, P335, DOI 10.1177/0013916502034003004
- Gigerenzer G., 1999, SIMPLE HEURISTICS MA
- GILBOA I, 1995, Q J ECON, V110, P605, DOI 10.2307/2946694
- Gillingham K, 2006, ANNU REV ENV RESOUR, V31, P161, DOI 10.1146/annurev.energy.31.020105.100157
- Gintis H, 2000, ECOL ECON, V35, P311, DOI 10.1016/S0921-8009(00)00216-0
- Goett AA, 2000, ENERGY J, V21, P1
- Green L. W., 1999, HLTH PROMOTION PLANN
- GREGORY R, 1993, J RISK UNCERTAINTY, V7, P177, DOI 10.1007/BF01065813
- GUAGNANO GA, 1995, ENVIRON BEHAV, V27, P699, DOI 10.1177/0013916595275005
- Denise A Guerin, 2000, FAMILY CONSUMER SCI, V29, P48
- Halpern D., 2004, PERSONAL RESPONSIBIL
- HANSON M, 2006, ROLE ENERGY EFFICIEN
- HARVEY CM, 1994, J PUBLIC ECON, V53, P31, DOI 10.1016/0047-2727(94)90012-4
- Hawkins D. I., 2004, CONSUMER BEHAV BUILD
- Heath C, 1996, J CONSUM RES, V23, P40, DOI 10.1086/209465
- HEBERLEIN TA, 1983, J ECON PSYCHOL, V4, P107, DOI DOI 10.1016/0167-4870(83)90048-X
- Henning A, 2005, ANTHROPOL TODAY, V21, P8, DOI 10.1111/j.0268-540X.2005.00352.x
- Herter K, 2007, ENERGY, V32, P25, DOI 10.1016/j.energy.2006.01.014
- Hines J., 1987, J ENVIRON EDUC, V18, P1, DOI DOI 10.1080/00958964.1987.9943482
- Holling CS, 1978, ADAPTIVE ENV ASSESSM
- Hoyer W., 2004, CONSUMER BEHAV
- IEA, 2004, OIL CRIS CLIM CHALL
- Intergovernmental Panel on Climate Change (IPCC), 2001, CLIM CHANG 2001 MIT
- Jaccard M, 2003, ENERGY J, V24, P49

- Jackson T., 2005, MOTIVATING SUSTAINAB
- JAFFE AB, 1994, ENERG POLICY, V22, P804, DOI 10.1016/0301-4215(94)90138-4
- JAFFE AB, 1994, ENERGY J, V15, P43
- Jager W, 2006, ENERG POLICY, V34, P1935, DOI 10.1016/j.enpol.2004.12.022
- JOCHEM E, 2000, SOC BEHAV CLIMATE CH
- Kahneman D, 2003, AM ECON REV, V93, P1449, DOI 10.1257/000282803322655392
- KAHNEMAN D, 1979, ECONOMETRICA, V47, P263, DOI 10.2307/1914185
- Kahneman D, 1999, WELL BEING FDN HEDON
- Kaplan AW, 1999, TECHNOVATION, V19, P467, DOI 10.1016/S0166-4972(98)00128-X
- Kaplan S, 2000, J SOC ISSUES, V56, P491, DOI 10.1111/0022-4537.00180
- KATZEV RD, 1987, J ENVIRON SYST, V17, P93, DOI 10.2190/XV00-DD4B-EPEH-EN5R
- Katzev R. D., 1987, PROMOTING ENERGY CON
- Keeney RL, 1992, VALUE FOCUSED THINKI
- Keirstead J, 2006, ENERG POLICY, V34, P3065, DOI 10.1016/j.enpol.2005.06.004
- KEMPTON W, 1992, AM PSYCHOL, V47, P1213, DOI 10.1037//0003-066X.47.10.1213
- KEMPTON W, 1992, ENERG BUILDINGS, V18, P171, DOI 10.1016/0378-7788(92)90011-5
- KEMPTON W, 1982, ENERGY, V7, P817, DOI 10.1016/0360-5442(82)90030-5
- King C, 2003, PUBLIC UTILITIES FOR, P27
- Knight R. L., 2006, ACEEE SUMM STUD EN E
- Kolmuss A., 2002, ENVIRON EDUC RES, V8, P239, DOI DOI 10.1080/13504620220145401
- KRAUS SJ, 1995, PERS SOC PSYCHOL B, V21, P58, DOI 10.1177/0146167295211007
- Laitner J. A. S., 2000, SOC BEHAV CLIMATE CH, P1
- LEVINE MD, 1995, ANNU REV ENERG ENV, V20, P535
- LOEWENSTEIN G, 1992, Q J ECON, V107, P573, DOI 10.2307/2118482
- Loughran DS, 2004, ENERGY J, V25, P19
- Louviere J.J, 2000, STATED CHOICE METHOD
- Lovins A., 2003, SMALL IS PROFITABLE
- LUTZENHISER L, 1993, ANNU REV ENERG ENV, V18, P247, DOI 10.1146/annurev.energy.18.1.247
- LUTZENHISER L, 2006, ACEEE SUMM STUD EN E
- Lutzenhiser L., 2002, NEW TOOLS ENV PROTEC, P49
- MAZUR A, 1974, SCIENCE, V186, P607, DOI 10.1126/science.186.4164.607
- McCalley LT, 2006, ENERG POLICY, V34, P129, DOI 10.1016/j.enpol.2004.08.024
- McDaniels TL, 2005, GLOBAL ENVIRON CHANG, V15, P9, DOI 10.1016/j.gloenvcha.2004.12.007
- McFadden D, 1999, J RISK UNCERTAINTY, V19, P73, DOI 10.1023/A:1007863007855
- MCGUIRE WJ, 1989, PUBLIC COMMUNICATION, P43
- McKenzie-Mohr D, 2000, J SOC ISSUES, V56, P543, DOI 10.1111/0022-4537.00183
- McKenzie-Mohr D., 1999, FOSTERING SUSTAINABL
- McMakin AH, 2002, ENVIRON BEHAV, V34, P848, DOI 10.1177/001391602237252
- Mitchell Robert, 1989, USING SURVEYS VALUE
- Moore G.A., 2002, CROSSING CHASM
- Moore GC, 1991, INFORM SYST RES, V2, P192, DOI 10.1287/isre.2.3.192
- Moxnes E, 2004, J ECON PSYCHOL, V25, P707, DOI 10.1016/S0167-4870(03)00072-2
- NADER L, 1978, ANNU REV ENERGY, V3, P1, DOI 10.1146/annurev.energy.03.110178.000245
- Newhouse N., 1991, J ENVIRON EDUC, V22, P26, DOI DOI 10.1080/00958964.1990.9943043
- O'Donoghue T, 1999, AM ECON REV, V89, P103, DOI 10.1257/aer.89.1.103
- olander F., 1995, J CONSUMER POLICY, V18, P345, DOI DOI 10.1007/BF01024160
- Olli E, 2001, ENVIRON BEHAV, V33, P181, DOI 10.1177/0013916501332002
- OLSEN ME, 1981, J SOC ISSUES, V37, P108, DOI 10.1111/j.1540-4560.1981.tb02628.x
- Oskamp S, 2000, J SOC ISSUES, V56, P373, DOI 10.1111/0022-4537.00173
- Pallak MS, 1980, APPL SOCIAL PSYCHOL, P235
- Parker P, 2003, CAN GEOGR-GEOGR CAN, V47, P169, DOI 10.1111/1541-0064.00006
- Parker P, 2005, LOCAL ENVIRON, V10, P173, DOI 10.1080/1354983052000330761
- Payne J. W., 1993, ADAPTIVE DECISION MA
- Peter J. P., 2005, CONSUMER BEHAV MARKE
- Poortinga W, 2004, ENVIRON BEHAV, V36, P70, DOI 10.1177/0013916503251466
- PROCHASKA JO, 1992, AM PSYCHOL, V47, P1102, DOI 10.1037//0003-066X.47.9.1102
- RAMESOHL S, 2000, SOC BEHAV CLIMATE CH, P207
- Reinders AHME, 2003, ENERG POLICY, V31, P139, DOI 10.1016/S0301-4215(02)00019-8

- Revelt D, 1998, REV ECON STAT, V80, P647, DOI 10.1162/003465398557735
- Rogers E., 2003, DIFFUSION INNOVATION
- Rogers EM, 2004, J HEALTH COMMUN, V9, P13, DOI 10.1080/10810730490271449
- Rokeach M., 1973, NATURE HUMAN VALUES
- Ruderman H., 1987, ENERGY J, V8, P101
- SCHIPPER L, 1989, ANNU REV ENERGY, V14, P273, DOI 10.1146/annurev.eg.14.110189.001421
- Schipper L, 2001, ANNU REV ENER ENV, V26, P49, DOI 10.1146/annurev.energy.26.1.49
- Schultz PW, 1996, SOC PSYCHOL QUART, V59, P375, DOI 10.2307/2787078
- Schultz PW, 1999, BASIC APPL SOC PSYCH, V21, P25, DOI 10.1207/15324839951036533
- Schultz P.W., 2002, NEW TOOLS ENV PROTEC, P67
- Schwartz B., 2004, PARADOX CHOICE
- SCHWARTZ SH, 1973, J EXP SOC PSYCHOL, V9, P349, DOI 10.1016/0022-1031(73)90071-1
- Schwartz S. H., 1977, ADV EXPT SOCIAL PSYC, V10, P221, DOI [DOI 10.1016/S0065-2601(08)60358-5, 10.1016/S0065-2601(08)60358-5]
- SELIGMAN C, 1978, ENER BUILDINGS, V1, P325, DOI 10.1016/0378-7788(78)90012-9
- Shefrin HM, 2004, ROUNDTABLE SER BEHAV, P395
- Shove E, 1998, ENER POLICY, V26, P1105, DOI 10.1016/S0301-4215(98)00065-2
- SHOVE E, 1998, HUMAN CHOICE CLIMATE, P291
- Shove E, 2003, COMFORT CLEANLINESS
- SIMON HA, 1956, PSYCHOL REV, V63, P129, DOI 10.1037/h0042769
- SIMON HA, 1997, EMPIRICALLY GROUNDED
- SIMONSON I, 1993, CALIF MANAGE REV, V35, P68, DOI 10.2307/41166755
- SKUMATZ LA, 2000, ACEEE SUMM STUD EN E
- Starmer C, 2000, J ECON LIT, V38, P332, DOI 10.1257/jel.38.2.332
- STERN PC, 1981, AM PSYCHOL, V36, P329, DOI 10.1037/0003-066X.36.4.329
- STERN PC, 1986, EVALUATION REV, V10, P147, DOI 10.1177/0193841X8601000201
- Stern PC, 2000, AM PSYCHOL, V55, P523, DOI 10.1037/0003-066X.55.5.523
- STERN PC, 1992, AM PSYCHOL, V47, P1224, DOI 10.1037//0003-066X.47.10.1224
- STERN PC, 1986, J POLICY ANAL MANAG, V5, P200, DOI 10.2307/3323541
- Stern PC, 1999, J CONSUM POLICY, V22, P461, DOI DOI 10.1023/A:1006211709570
- Stern P. C., 2000, J SOC ISSUES, V56, P523
- Stern P. C., 1985, ENERGY EFFICIENCY BU
- Stern P. C., 1999, HUMAN ECOLOGY REV, V6, P81, DOI DOI 10.2307/2083693
- Summerton J., 1992, DISTRICT HEATING COM
- SUNSTEIN CR, 2003, 032 AEI
- Sutherland R. J., 1991, ENERGY J, V12, P15, DOI DOI 10.5547/ISSN0195-6574-EJ-VOL12-N03-3
- Swart RJ, 2004, GLOBAL ENVIRON CHANG, V14, P137, DOI 10.1016/j.gloenvcha.2003.10.002
- Thaler R., 1985, MARKET SCI, V4, P199, DOI DOI 10.1287/MKSC.4.3.199
- Thaler RH, 1999, J BEHAV DECIS MAKING, V12, P183, DOI 10.1002/(SICI)1099-0771(199909)12:3<183::AID-BDM318>3.0.CO;2-F
- THALER RH, 1990, J ECON PERSPECT, V4, P193, DOI 10.1257/jep.4.1.193
- Thogersen J, 2006, ENVIRON BEHAV, V38, P550, DOI 10.1177/0013916505283832
- Todd PM, 2003, J ECON PSYCHOL, V24, P143, DOI 10.1016/S0167-4870(02)00200-3
- TORNATZKY LG, 1982, IEEE T ENG MANAGE, V29, P28, DOI 10.1109/TEM.1982.6447463
- TRAIN K, 1985, ENERGY, V10, P1243, DOI 10.1016/0360-5442(85)90135-5
- TVERSKY A, 1981, SCIENCE, V211, P453, DOI 10.1126/science.7455683
- TVERSKY A, 1992, J RISK UNCERTAINTY, V5, P297, DOI 10.1007/BF00122574
- TVERSKY A, 1974, SCIENCE, V185, P1124, DOI 10.1126/science.185.4157.1124
- \*US EIA, 2001, RES EN CONS SURV TAB
- Valente Thomas W., 2002, NEW TOOLS ENV PROTEC, P105
- van Vliet B, 2005, INFRASTRUCTURES CONS
- Weber C, 2000, ENER POLICY, V28, P549, DOI 10.1016/S0301-4215(00)00040-9
- Wilhelm D, 2005, CHIR GASTROENTEROL, V21, P1, DOI 10.1159/000089341
- Wilhite H, 1999, ADV CONSUM RES, V26, P281
- WILHITE H, 2000, SOC BEHAV CLIMATE CH, P109
- WILHITE HL, 1987, ENER BUILDINGS, V10, P73, DOI 10.1016/0378-7788(87)90007-7
- Wirf F, 1998, REV IND ORGAN, V13, P467, DOI 10.1023/A:1007707523605
- Wirf F, 2000, ENERGY J, V21, P87

YATES SM, 1983, AM PSYCHOL, V38, P435, DOI 10.1037/0003-066X.38.4.435

Lichtenstein S, 2006, CONSTRUCTION OF PREFERENCE, P1, DOI 10.2277/ 0521542200

NR 194

TC 241

Z9 241

U1 1

U2 95

PU ANNUAL REVIEWS

PI PALO ALTO

PA 4139 EL CAMINO WAY, PO BOX 10139, PALO ALTO, CA 94303-0139 USA

SN 1543-5938

J9 ANNU REV ENV RESOUR

J1 Annu. Rev. Environ. Resour.

PY 2007

VL 32

BP 169

EP 203

DI 10.1146/annurev.energy.32.053006.141137

PG 35

WC Environmental Sciences; Environmental Studies

SC Environmental Sciences & Ecology

GA 236CJ

UT WOS:000251280300007

DA 2018-05-03

ER

PT J

AU Fisk, WJ

AF Fisk, WJ

TI Health and productivity gains from better indoor environments and their relationship with building energy efficiency

SO ANNUAL REVIEW OF ENERGY AND THE ENVIRONMENT

LA English

DT Review

DE economics; health; productivity

ID RESPIRATORY-TRACT INFECTIONS; OFFICE WORKERS; UNITED-STATES;

TASK-PERFORMANCE; ALLERGIC DISEASE; ECONOMIC COSTS; ASTHMA; CHILDREN; SYMPTOMS; SATISFACTION

AB Theoretical considerations and empirical data suggest that existing technologies and procedures can improve indoor environments in a manner that significantly increases productivity and health. The existing literature contains moderate to strong evidence that characteristics of buildings and indoor environments significantly influence rates of communicable respiratory illness, allergy and asthma symptoms, sick building symptoms, and worker performance. Whereas there is considerable uncertainty in the estimates of the magnitudes of productivity gains that may be obtained by providing better indoor environments, the projected gains are very large. For the United States, the estimated potential annual savings and productivity gains are \$6 to \$14 billion from reduced respiratory disease, \$1 to \$4 billion from reduced allergies and asthma, \$10 to \$30 billion from reduced sick building syndrome symptoms, and \$20 to \$160 billion from direct improvements in worker performance that are unrelated to health. Productivity gains that are quantified and demonstrated could serve as a strong stimulus for energy efficiency measures that simultaneously improve the indoor environment.

C1 Lawrence Berkeley Natl Lab, Indoor Environm Dept, Environm Energy Technol Div, Berkeley, CA 94720 USA.

RP Fisk, WJ (reprint author), Lawrence Berkeley Natl Lab, Indoor Environm Dept, Environm Energy Technol Div, Berkeley, CA 94720 USA.

CR ANTONICELLI L, 1991, ALLERGY, V46, P594, DOI 10.1111/j.1398-9995.1991.tb00629.x

ARSHAD SH, 1992, LANCET, V339, P1493, DOI 10.1016/0140-6736(92)91260-F

BERMAN SM, 1993, J ILLUM ENG SOC, V22, P150, DOI 10.1080/00994480.1993.10748048

BERMAN SM, 1994, J ILLUM ENG SOC, V23, P123, DOI 10.1080/00994480.1994.10748086

- BORAY PF, 1989, J ENVIRON PSYCHOL, V9, P297, DOI 10.1016/S0272-4944(89)80011-8  
Brightman HS, 1997, P HLTH BUILD IAQ 97, V2, P453  
BRUNDAGE JF, 1988, JAMA-J AM MED ASSOC, V259, P2108, DOI 10.1001/jama.259.14.2108  
\*COMM ASS ASTHM IN, 1999, CLEAR AIR ASTHM IND  
Dales R, 1998, ARCH ENVIRON HEALTH, V53, P190, DOI 10.1080/00039899809605694  
\*DIV RESP DIS STUD, 1984, MMWR-MORBID MORTAL W, V33, P506  
DIXON RE, 1985, AM J MED, V78, P45, DOI 10.1016/0002-9343(85)90363-8  
Drinka PJ, 1996, J AM GERIATR SOC, V44, P910, DOI 10.1111/j.1532-5415.1996.tb01859.x  
\*EN INF ADM, 1998, DOEEIA062595  
EVANS D, 1987, AM REV RESPIR DIS, V135, P567  
Fireman P, 1997, ALLERGY ASTHMA PROC, V18, P63, DOI 10.2500/108854197778605482  
Fisk WJ, 1997, INDOOR AIR, V7, P158, DOI 10.1111/j.1600-0668.1997.t01-1-00002.x  
Fisk WJ, 1993, INDOOR AIR, V3, P246, DOI DOI 10.1111/J.1600-0668.1993.00005.X  
Fisk WJ, 2000, INDOOR AIR QUALITY H  
GARIBALDI RA, 1985, AM J MED, V78, P32, DOI 10.1016/0002-9343(85)90361-4  
HALL JD, 1998, P IAQ 98 US ASHRAE S  
HARVING H, 1991, ALLERGY, V46, P33, DOI 10.1111/j.1398-9995.1991.tb00647.x  
HEDGE A, 1995, ERGONOMICS, V38, P260, DOI 10.1080/00140139508925103  
Heschong Mahone Group, 1999, DAYL SCH INV REL DAY  
HOFFMAN RE, 1993, AM J PUBLIC HEALTH, V83, P89, DOI 10.2105/AJPH.83.1.89  
HOGE CW, 1994, NEW ENGL J MED, V331, P643, DOI 10.1056/NEJM199409083311004  
Husman T, 1996, SCAND J WORK ENV HEA, V22, P5, DOI 10.5271/sjweh.103  
HUSMAN T, 1993, P 6 INT C IND AIR QU, V1, P171  
INGRAM JM, 1993, IMMUNOL ALLERGY CLIN, V13, P785  
\*IPMVP IEQ COMM, 1999, IND ENV QUAL INTRO L  
JAAKKOLA JJK, 1995, OCCUP ENVIRON MED, V52, P709, DOI 10.1136/oem.52.11.709  
JAAKKOLA JJK, 1995, EUR J EPIDEMIOL, V11, P213, DOI 10.1007/BF01719490  
JOHNSTON SL, 1995, BRIT MED J, V310, P1225, DOI 10.1136/bmj.310.6989.1225  
KATZEV R, 1992, ENVIRON BEHAV, V24, P759, DOI 10.1177/0013916592246004  
KOSKINEN O, 1995, INDOOR AIR, V5, P3, DOI 10.1111/j.1600-0668.1995.t01-3-00002.x  
Koskinen OM, 1997, INDOOR AIR, V7, P262, DOI 10.1111/j.1600-0668.1997.00005.x  
KRONER WM, 1992, P IND ENV PROD JUN 2  
LANGMUIR AD, 1948, AM J HYG, V48, P240, DOI 10.1093/oxfordjournals.aje.a119239  
MCMENAMIN P, 1995, CHRONIC AIRWAY DIS C  
MENDELL MJ, 1993, INDOOR AIR, V3, P227  
Menzies D, 1997, ARCH ENVIRON HEALTH, V52, P360, DOI 10.1080/00039899709602212  
Menzies D, 1997, NEW ENGL J MED, V337, P1524, DOI 10.1056/NEJM199711203372107  
Menzies D, 1998, J ALLERGY CLIN IMMUN, V101, P38, DOI 10.1016/S0091-6749(98)70191-5  
MILTON DK, 2000, IN PRESS INDOOR AIR, V10  
Myhrvold A., 1997, P HLTH BUILD IAQ 99, V1, P81  
Myhrvold A. N., 1996, P IND AIR 96 7 INT C, P369  
\*NATL EL MAN ASS, 1989, LIGHT HUM PERF REV  
NELSON NA, 1995, SCAND J WORK ENV HEA, V21, P51, DOI 10.5271/sjweh.8  
\*NEW YORK STAT COM, 1923, VENTILATION REPORT N, pCH23  
NUNES F, 1993, P 6 INT C IND AIR QU, V1, P53  
PLATTSMILLS TAE, 1987, J ALLERGY CLIN IMMUN, V80, P755, DOI 10.1016/S0091-6749(87)80261-0  
PLATTSMILLS TAE, 1994, ANN ALLERGY, V72, P381  
POLLART SM, 1987, PRIMARY CARE, V14, P591  
Pope AM, 1993, INDOOR ALLERGENS ASS  
PRELLER L, 1990, P IND AIR 90 OTT CAN, V1, P227  
RAPPAPORT S, 1998, MMWR-MORBID MORTAL W, V47, P1022  
Raw G. J., 1990, P 5 INT C IND AIR QU, V1, P231  
RICHARDS AL, 1993, AM J PUBLIC HEALTH, V83, P1326, DOI 10.2105/AJPH.83.9.1326  
ROMM J, 1994, LEAN CLEAN MANAGEMEN  
Seppanen OA, 1999, INDOOR AIR, V9, P226, DOI 10.1111/j.1600-0668.1999.00003.x  
SIEBER WK, 1996, P IND AIR 96 7 INT C, V2, P901  
SMITH AP, 1990, PHILOS T ROY SOC B, V327, P519, DOI 10.1098/rstb.1990.0095  
Smith DH, 1997, AM J RESP CRIT CARE, V156, P787, DOI 10.1164/ajrccm.156.3.9611072

SMITH JL, 1982, J THEOR SOC BEHAV, V12, P29, DOI 10.1111/j.1468-5914.1982.tb00436.x  
 SMITH MD, 1997, BUS HLTH OCT, P47  
 SMITH SW, 1979, J ILLUMINATING ENG S, V8, P47  
 SUNDELL J, 1994, INDOOR AIR S, V2, P1  
 TINKER MA, 1952, AM J PSYCHOL, V65, P600, DOI 10.2307/1418042  
 TRAYNOR GW, 1993, P IND AIR 93 HELS 6, V3, P595  
 U.S. Bureau of the Census, 1997, STAT ABSTR US 1997  
 \*US DEP HHS, 1994, DHHS PUB  
 U.S. Environmental Protection Agency, 1989, EPA400189001C  
 Veitch JA, 1998, J ILLUM ENG SOC, V27, P107, DOI 10.1080/00994480.1998.10748216  
 VEITCH JA, 1991, J ENVIRON PSYCHOL, V11, P87, DOI 10.1016/S0272-4944(05)80007-6  
 VEITCH JA, 1990, J ENVIRON PSYCHOL, V10, P209, DOI 10.1016/S0272-4944(05)80096-9  
 Wahn U, 1997, J ALLERGY CLIN IMMUN, V99, P763, DOI 10.1016/S0091-6749(97)80009-7  
 WARGOCKI P, 1998, 9803 TU DENM CENT IN  
 WARSHAUER DM, 1989, AM J EPIDEMIOL, V129, P319, DOI 10.1093/oxfordjournals.aje.a115136  
 WEISS KB, 1992, NEW ENGL J MED, V326, P862, DOI 10.1056/NEJM199203263261304  
 WOODS JE, 1989, OCCUP MED, V4, P753  
 WOODS JE, 1987, 4TH P INT C IND AIR, V2, P464  
 WYON DP, 1979, SCAND J WORK ENV HEA, V5, P352, DOI 10.5271/sjweh.2646  
 Wyon DP, 1996, P IND AIR 96 I PUBL, V1, P1067  
 Wyon D., 1996, P IAQ 96 PATHS BETT, V1, P5  
 Wyon D, 1993, P INDOOR AIR 93, V6, P3

NR 84  
 TC 191  
 Z9 196  
 U1 6  
 U2 66  
 PU ANNUAL REVIEWS  
 PI PALO ALTO  
 PA 4139 EL CAMINO WAY, PO BOX 10139, PALO ALTO, CA 94303-0139 USA  
 SN 1056-3466  
 J9 ANNU REV ENERG ENV  
 JI Annu. Rev. Energ. Environ.  
 PY 2000  
 VL 25  
 BP 537  
 EP 566  
 DI 10.1146/annurev.energy.25.1.537  
 PG 30  
 WC Energy & Fuels; Engineering, Environmental  
 SC Energy & Fuels; Engineering  
 GA 396EZ  
 UT WOS:000166624500016  
 DA 2018-05-03  
 ER

PT J  
 AU Nguyen, TA  
 Aiello, M  
 AF Tuan Anh Nguyen  
 Aiello, Marco  
 TI Energy intelligent buildings based on user activity: A survey  
 SO ENERGY AND BUILDINGS  
 LA English  
 DT Review  
 DE Building automation; Energy awareness; Activity recognition  
 ID OFFICE BUILDINGS; EMBEDDED AGENTS; CONSUMPTION; NETWORKS

AB Occupant presence and behaviour in buildings has been shown to have large impact on heating, cooling and ventilation demand, energy consumption of lighting and appliances, and building controls. Energy-unaware behaviour can add one-third to a building's designed energy performance. Consequently, user activity and behaviour is considered as a key element and has long been used for control of various devices such as artificial light, heating, ventilation, and air conditioning. However, how are user activity and behaviour taken into account? What are the most valuable activities or behaviours and what is their impact on energy saving potential? In order to answer these questions, we provide a novel survey of prominent international intelligent buildings research efforts with the theme of energy saving and user activity recognition. We devise new metrics to compare the existing studies. Through the survey, we determine the most valuable activities and behaviours and their impact on energy saving potential for each of the three main subsystems, i.e., HVAC, light, and plug loads. The most promising and appropriate activity recognition technologies and approaches are discussed thus allowing us to conclude with principles and perspectives for energy intelligent buildings based on user activity. (c) 2012 Elsevier B.V. All rights reserved.

C1 [Tuan Anh Nguyen; Aiello, Marco] Univ Groningen, Johann Bernoulli Inst Math & Comp Sci, Distributed Syst Grp, NL-9747 AG Groningen, Netherlands.

RP Nguyen, TA (reprint author), Univ Groningen, Johann Bernoulli Inst Math & Comp Sci, Distributed Syst Grp, Nijenborgh 9, NL-9747 AG Groningen, Netherlands.

EM t.a.nguyen@rug.nl; m.aiello@rug.nl

FU EU FP7 Project GreenerBuildings [258888]; Dutch National Research Council under the NWO Smart Energy Systems program [647.000.004]; Vietnam International Education Development program (VIED)

FX The work is supported by the EU FP7 Project GreenerBuildings, contract no. 258888 and the Dutch National Research Council under the NWO Smart Energy Systems program, contract no. 647.000.004. Tuan Anh Nguyen is supported by the Vietnam International Education Development program (VIED).

CR Agarwal Y., 2010, P 2 ACM WORKSH EMB S, P1, DOI DOI 10.1145/1878431.1878433

Aggarwal J.K., ACM COMPUTING SURVEY

Arens E, 2005, AMBIENT INTELLIGENCE, P63, DOI 10.1007/3-540-27139-2\_5

Barbato A., 2009, P 1 ACM WORKSH EMB S, P49, DOI DOI 10.1145/1810279.1810291

Callaghan V., 2005, PROGRAMMING ISPACES

Chan M, 2008, COMPUT METH PROG BIO, V91, P55, DOI 10.1016/j.cmpb.2008.02.001

Chen H, 2009, ICEBE 2009: IEEE INTERNATIONAL CONFERENCE ON E-BUSINESS ENGINEERING, PROCEEDINGS, P255, DOI 10.1109/ICEBE.2009.42

Chen L., 2011, ATLANTIS AMBIENT PER, V4, P1

Lin C.C.F. Craig, 2002, INT C ENH BUILD OP, P14

Crawley D, 2004, P SIMBUILD, P4

Davidsson P, 2005, INFORM SCIENCES, V171, P293, DOI 10.1016/j.ins.2004.09.007

Davidsson P, 2000, LECT NOTES COMPUT SC, V1882, P166

Delaney D.T., 2009, P 1 ACM WORKSH EMB S

Diaz P., ECOSENSE PROJECT INT, DOI [10.1007/978-3-642-17387-524, DOI 10.1007/978-3-642-17387-524]

Dilouie C., ARCHITECTURAL LI SEP

Dodier RH, 2006, ENERB BUILDINGS, V38, P1033, DOI 10.1016/j.enbuild.2005.12.001

Dong B., 2009, P BUILD SIM 2009 IBP

Dong B., 2011, P BUILD SIM 2011 12

[Anonymous], 2011, E3SOHO PROJECT

[Anonymous], 2011, PROJECT NEWS

EIA, 2011, ANN EN REV 2010 ANN

Energy Policy Branch Energy Sector Energy Forecasting Division, CAN EN OUTL 1996 202

Erickson V. L., 2009, P 1 ACM WORKSH EMB S, P19, DOI DOI 10.1145/1810279.1810284

Erickson V. L., 2011, INF PROC SENS NETW I, P258

Erickson V. L., 2010, P 2 ACM WORKSH EMB S, P7

Gao G., 2009, P 1 ACM WORKSH EMB S, P67, DOI DOI 10.1145/1810279.1810294

Garg V, 2000, ENERB BUILDINGS, V32, P81, DOI 10.1016/S0378-7788(99)00040-7

Georgievski I., 2012, IEEE T SMAR IN PRESS

Hagras H, 2004, IEEE INTELL SYST, V19, P12, DOI 10.1109/MIS.2004.61

Harle R.K., 2008, P 10 INT C UB COMP U, P302, DOI DOI 10.1145/1409635.1409676



HARRIS C, 2005, WIR MOB COMP NETW CO, V4, P122  
 Hawarah L, 2010, LECT NOTES ARTIF INT, V6113, P372, DOI 10.1007/978-3-642-13208-7\_47  
 Hay S., 2009, P 1 ACM WORKSH EMB S, P13  
 [Anonymous], 2011, HOMES PROJECT  
 [Anonymous], 2011, HOSPILOT PROJECT  
 Kamthe A, 2009, LECT NOTES COMPUT SC, V5432, P279  
 Kastner W, 2010, P 8 IEEE INT WORKSH, P169  
 Kim Y., 2008, SPOTLIGHT PERSONAL  
 Levermore G. J., 2000, BUILDING ENERGY MANA  
 Levine M., 2007, CLIMATE CHANGE 2007  
 Lorente S., 2004, Proceedings. 2004 International Conference on Information and Communication Technologies: From Theory to Applications (IEEE Cat. No.04EX852), P121, DOI 10.1109/ICTTA.2004.1307644  
 Lu Jiakang, 2010, P 8 ACM C EMB NETW S  
 Marchiori A., 2010, P 2 ACM WORKSH EMB S, P37  
 MILLS E, 2002, LIGHT ENG, V10, P5  
 Mozer M., P AM ASS ARTIFICIAL  
 Newsham G. R., 2010, P 2 ACM WORKSH EMB S, P13  
 Nguyen T., 2012, P 2 INT C PERV EMB C  
 Padmanabh K., 2009, P 1 ACM WORKSH EMB S, P37  
 Page J, 2008, ENERGBUILDINGS, V40, P83, DOI 10.1016/j.enbuild.2007.01.018  
 Perez-Lombard L, 2008, ENERGBUILDINGS, V40, P394, DOI 10.1016/j.enbuild.2007.03.007  
 Pfafferott JU, 2007, ENERGBUILDINGS, V39, P750, DOI 10.1016/j.enbuild.2007.02.005  
 Rashidi P., 2010, ACM INT HLTH INF S  
 Rathouse K., 2004, TECHNICAL REPORT  
 Reinisch C, 2011, EURASIP J EMBED SYST, V2011, P18  
 Reinisch C., 2010, P 4 IEEE INT C DIG E, P256  
 [Anonymous], 2011, SEEMPUBS PROJECT  
 Singhvi V., 2005, P 3 INT C EMB NETW S, P218, DOI DOI 10.1145/1098918.1098942  
 So A. T. P., 2011, INTELLIGENT BUILDING  
 U.S. Environmental Protection Agency, 2012, GREEN BUILD BAS INF  
 WBCSD, 2009, TRANSF MARK EN EFF B  
 Wen YB, 2008, IEEE WCNC, P1  
 Wigginton M., 2002, INTELLIGENT SKINS  
 Wong JKW, 2005, AUTOMAT CONSTR, V14, P143, DOI 10.1016/j.autcon.2004.06.001  
 Wyon D. P., 1997, CREAT PROD WORKPL C  
 Zhen Z.-N., 2008, EN 2030 C 2008 ENERGB, P1  
 [Anonymous], 2011, INTELLIGENT BUILDING  
 [Anonymous], 2011, ADAPTIVE HOUSE PROJE

NR 67  
 TC 177  
 Z9 179  
 U1 18  
 U2 91  
 PU ELSEVIER SCIENCE SA  
 PI LAUSANNE  
 PA PO BOX 564, 1001 LAUSANNE, SWITZERLAND  
 SN 0378-7788  
 J9 ENERGBUILDINGS  
 JI Energy Build.  
 PD JAN  
 PY 2013  
 VL 56  
 BP 244  
 EP 257  
 DI 10.1016/j.enbuild.2012.09.005  
 PG 14  
 WC Construction & Building Technology; Energy & Fuels; Engineering, Civil

SC Construction & Building Technology; Energy & Fuels; Engineering  
 GA 082FU  
 UT WOS:000314378500027  
 DA 2018-05-03  
 ER

PT J

AU Gram-Hanssen, K

AF Gram-Hanssen, Kirsten

TI Residential heat comfort practices: understanding users

SO BUILDING RESEARCH AND INFORMATION

LA English

DT Article

DE control systems; domestic heating; energy demand; habits; indoor  
 environment; inhabitant behaviour; social convention; thermal comfort

ID CULTURE

AB The user-centred approach to heat consumption in housing is a highly relevant, but often neglected, aspect of residential energy consumption. The practice-theory approach is presented as a development within the socio-technical approach. A detailed analysis of empirical evidence from different households living in similar buildings in a suburb of Copenhagen, Denmark, shows significant variation in energy consumption due to different usage patterns of both the house and its heating system. An analysis using practice-theory finds that technologies, embodied habits, knowledge, and meanings are the main components in the understanding of both what holds this practice together as a collectively shared practice and the different socio-material configurations of each of the individual households.

C1 Univ Aalborg, Danish Bldg Res Inst, DK-2970 Horsholm, Denmark.

RP Gram-Hanssen, K (reprint author), Univ Aalborg, Danish Bldg Res Inst, Dr Neergaards Vej 15, DK-2970 Horsholm, Denmark.

EM kgh@sbi.dk

OI Gram-Hanssen, Kirsten/0000-0002-8543-2501

CR BOURDIEU Pierre, 1976, OUTLINE THEORY PRACT

Brown S, 2008, BUILD RES INF, V36, P363, DOI 10.1080/09613210802076427

\*DAN EN AUTH, 2003, EN 2002

Fischer C, 2008, ENERG EFFIC, V1, P79, DOI 10.1007/s12053-008-9009-7

Giddens Anthony, 1984, CONSTITUTION SOC

GRAMHANSSSEN K, 2003, BOLIGERS ENERGIFORBU

GRAMHANSSSEN K, 2007, ANN C EUR SOC ASS CO

Gram-Hanssen K., 2004, ECOLOGICAL EC CONSUM, P132

GRAMHANSSSEN K, 2002, P 2002 AM COUNC EN E

Gronow J., 2001, ORDINARY CONSUMPTION

Healy S, 2008, BUILD RES INF, V36, P312, DOI 10.1080/09613210802076351

KEMPTON W, 1992, ENERG BUILDINGS, V18, P177, DOI 10.1016/0378-7788(92)90012-6

KEMPTON W, 1992, ENERG BUILDINGS, V18, P171, DOI 10.1016/0378-7788(92)90011-5

KEMPTON W, 1986, COGNITIVE SCI, V10, P75, DOI 10.1207/s15516709cog1001\_3

LUTZENHISER L, 1992, ENERG BUILDINGS, V18, P193, DOI 10.1016/0378-7788(92)90013-7

Parkhurst G, 2008, BUILD RES INF, V36, P351, DOI 10.1080/09613210802076500

Reckwitz A, 2002, J THEOR SOC BEHAV, V32, P195, DOI 10.1111/1468-5914.00183

Reckwitz A., 2002, EUR J SOC THEORY, V5, P243, DOI [10.1177/1368431022225432, DOI 10.1177/1368431022225432]

Schatzki T., 1996, SOCIAL PRACTICES WIT

Schatzki Theodore R, 2001, PRACTICE TURN CONT T

Schatzki Theodore R., 2002, SITE SOCIAL PHILOS A

Shove E., 2005, Journal of Consumer Culture, V5, P43, DOI 10.1177/1469540505049846

Shove E, 2003, COMFORT CLEANLINESS

Shove E, 2008, BUILD RES INF, V36, P307, DOI 10.1080/09613210802079322

Warde A, 2005, J CONSUM CULT, V5, P131, DOI DOI 10.1177/1469540505053090

Wilhite H, 1996, ENERG POLICY, V24, P795, DOI 10.1016/0301-4215(96)00061-4

NR 26

TC 161

Z9 162  
 U1 1  
 U2 49  
 PU TAYLOR & FRANCIS LTD  
 PI ABINGDON  
 PA 4 PARK SQUARE, MILTON PARK, ABINGDON OX14 4RN, OXON, ENGLAND  
 SN 0961-3218  
 J9 BUILD RES INF  
 JI Build. Res. Informat.  
 PY 2010  
 VL 38  
 IS 2  
 BP 175  
 EP 186  
 DI 10.1080/09613210903541527  
 PG 12  
 WC Construction & Building Technology  
 SC Construction & Building Technology  
 GA 575WC  
 UT WOS:000276099200004  
 DA 2018-05-03  
 ER

PT J

AU Linden, AL  
     Carlsson-Kanyama, A  
     Eriksson, B  
 AF Linden, AL  
     Carlsson-Kanyama, A  
     Eriksson, B

TI Efficient and inefficient aspects of residential energy behaviour: What are the policy instruments for change?

SO ENERGY POLICY

LA English

DT Article

DE environmental awareness; energy attitudes; energy efficient behaviour; households

AB The empirical part of this study is based on a survey of 600 Swedish households and a number of interviews where questions about residential energy behaviour and possible policy instruments for change were raised. The study provides insight into current behavioural patterns and gives a bottom-up perspective on the realistic perspective potentials for change and ways to achieve them. Residential energy use accounts for a fifth of the total in Northern nations and patterns of behaviour may influence levels of energy use to the same extent as choice of appliances. The study revealed those behavioural patterns that are efficient and those that need to be improved for energy conservation. Several policy instruments for change were identified in the study and they include combinations of information, economic measures, administrative measures and more user friendly technology as well as equipment with sufficient esthetic quality. Policy instruments that have fostered energy efficient behaviour in Sweden include the massive information campaigns during the oil crises in the 1970s as well as energy labelling of appliances. Still, many households are "energy-unaware" and several energy efficient behaviours are motivated not by energy conservation concern but of a perceived lack of time. This shows that it is important to have a broad perspective in energy conservation, to evaluate trends and to use policy instruments timely to support or discourage them. (c) 2005 Elsevier Ltd. All rights reserved.

C1 Lund Univ, Dept Sociol, SE-22100 Lund, Sweden.

FOI, Dept Environm Strategies Res, SE-17290 Stockholm, Sweden.

RP Linden, AL (reprint author), Lund Univ, Dept Sociol, POB 114, SE-22100 Lund, Sweden.

EM anna-lisa.linden@soc.lu.se

CR Ajzen I., 1980, UNDERSTANDING ATTITU  
 BERNTSSON L, 2003, INDIVIDUELL MATNING

Biel A, 2003, INDIVIDUAL STRUCTURA  
CARLSSONKANYAMA A, 2003, HUSHALLSKUNDER ENERGI  
CARLSSONKANYAMA A, 2004, IN PRESS INT J CONSUMER  
Dexter L. A., 1964, PEOPLE SOCIETY MASS COMMUNICATIONS  
Francke L, 1996, SIGHT AND SOUND, V6, P6  
Fung A, 2001, POLITICAL SOCIOLOGY, V29, P5, DOI 10.1177/0032329201029001002  
Gardner G.T., 1996, ENVIRONMENTAL PROBLEMS HUMAN BEHAVIOUR  
Glaumann M, 1996, LAG ELANVANDNINGEN I BOSNIA  
Gram-Hansen K, 2003, NORDIC ENVIRONMENTAL SOCIOLOGY  
HELBY P, 1999, 5019 NATURAL FORUM  
Henryson J, 2000, ENERGY POLICY, V28, P169, DOI 10.1016/S0301-4215(00)00004-5  
\*IEA, 2003, INFOTODAY FINANCIAL CONSUMPTION  
\*IEA, 2002, ENERGY LAB STANDARDS  
\*IEA/OECD, 2000, DEALING WITH CLIMATE CHANGE POLICY  
Jordan Andrew, 2003, ENVIRONMENTAL POLITICS  
KLINTMAN M, 2000, NATURE SOCIAL SCIENCE EXPLAINS  
Linden AL, 2002, ENERGY POLICY, V30, P897, DOI 10.1016/S0301-4215(02)00003-4  
LINDEN AL, 2000, HINDER INCITAMENTEN I ENERGI  
LINDEN AL, 1994, FRAMTIDENS PENSIONÄRSKATT  
Linden A.-L., 1994, MANNISKA MILJÖ ATTITJÄDER  
Linden A.-L., 2004, MILJÖMEDVETNA MEDBORARE  
Linden A.-L., 2001, ALLMANHETENS MILJÖPÅVERKANING  
LINDEN AL, 2003, INDIVIDUAL STRUCTURA  
McQuail D., 1987, MASS COMMUNICATION THEORY  
PALMBORG C, 1986, D241986 SWEDISH COUNCIL FOR ENVIRONMENTAL QUALITY  
POPENOE D, 1983, PRIVATE PLEASURE PUBLIC POLICY  
Schramm W., 1961, PROCESS EFFECTS MASS COMMUNICATIONS  
SHANAHAN H, 1995, ENERGI VARDAGSVANOR I HVB  
STAATS HJ, 1995, EMR9557 LEIDNING I UPPGIFTSOMRÅDET  
WIDEGRENDAFGÅRD K, 1991, FRÅN VILLOR TILL VANOR  
Windahl S., 1992, USING COMMUNICATION TO CHANGE BEHAVIOUR

NR 33  
TC 152  
Z9 157  
U1 6  
U2 37  
PU ELSEVIER SCIENCE LTD  
PI OXFORD  
PA THE BOULEVARD, LANGFORD LANE, KIDLINGTON, OXFORD OX5 1GB, OXON, ENGLAND  
SN 0301-4215  
J9 ENERGY POLICY  
JI Energy Policy  
PD SEP  
PY 2006  
VL 34  
IS 14  
BP 1918  
EP 1927  
DI 10.1016/j.enpol.2005.01.015  
PG 10  
WC Economics; Energy & Fuels; Environmental Sciences; Environmental Studies  
SC Business & Economics; Energy & Fuels; Environmental Sciences & Ecology  
GA 045XM  
UT WOS:000237776000018  
DA 2018-05-03  
ER

PT J

AU Diakaki, C  
 Grigoroudis, E  
 Kolokotsa, D

AF Diakaki, Christina  
 Grigoroudis, Evangelos  
 Kolokotsa, Dionyssia

TI Towards a multi-objective optimization approach for improving energy efficiency in buildings

SO ENERGY AND BUILDINGS

LA English

DT Article

DE building; energy efficiency; energy improvement; multi-objective optimization

ID MULTICRITERIA; PERFORMANCE; ENVIRONMENT; SCENARIOS; RETROFIT; DESIGN; MODEL

AB The energy sector worldwide faces evidently significant challenges that everyday become even more acute. Innovative technologies and energy efficiency measures are nowadays well known and widely spread, and the main issue is to identify those that will be proven to be the more effective and reliable in the long term. With such a variety of proposed measures, the decision maker has to compensate environmental, energy, financial and social factors in order to reach the best possible solution that will ensure the maximization of the energy efficiency of a building satisfying at the same time the building's final user/occupant/owner needs. This paper investigates the feasibility of the application of multi-objective optimization techniques to the problem of the improvement of the energy efficiency in buildings, so that the maximum possible number of alternative solutions and energy efficiency measures may be considered. It further shows that no optimal solution exists for this problem due to the competitiveness of the involved decision criteria. A simple example is used to identify the potential strengths and weaknesses of the proposed approach, and highlight potential problems that may arise. (C) 2008 Elsevier B.V. All rights reserved.

C1 [Diakaki, Christina; Kolokotsa, Dionyssia] Technol Educ Inst Crete, Dept Nat Resources & Environm, Khania 73133, Crete, Greece.

[Grigoroudis, Evangelos] Tech Univ Crete, Dept Prod Engn & Management, Kounoupidiana 73100, Chania, Greece.

RP Diakaki, C (reprint author), Technol Educ Inst Crete, Dept Nat Resources & Environm, 3 Romanou Str, Khania 73133, Crete, Greece.

EM diakaki@chania.teicrete.gr

RI Diakaki, Christina/K-2647-2016; Grigoroudis, Evangelos/D-7716-2013

OI Diakaki, Christina/0000-0003-1724-0193; Kolokotsa, Dionyssia/0000-0003-2960-3772

CR Al-Homoud MS, 2001, BUILD ENVIRON, V36, P421, DOI 10.1016/S0360-1323(00)00026-3

Alanne K, 2004, AUTOMAT CONSTR, V13, P377, DOI 10.1016/j.sutcon.2003.12.004

Blondeau P, 2002, BUILD ENVIRON, V37, P165, DOI 10.1016/S0360-1323(01)00017-8

Chen Z, 2006, ENER BUILDINGS, V38, P393, DOI 10.1016/j.enbuild.2005.08.001

Collette Y., 2004, MULTIOBJECTIVE OPTIM

Dascalaki E, 2002, BUILD ENVIRON, V37, P557, DOI 10.1016/S0360-1323(02)00002-1

Diakoulaki D, 2005, INT SER OPER RES MAN, V78, P859, DOI 10.1007/0-387-23081-5\_21

Ehrgott M., 2005, MULTICRITERIA OPTIMI

Ehrgott M, 2005, INT SER OPER RES MAN, V78, P667, DOI 10.1007/0-387-23081-5\_17

Flourentzou F, 2002, ENER BUILDINGS, V34, P185, DOI 10.1016/S0378-7788(01)00106-2

GERO JS, 1983, BUILD ENVIRON, V18, P99, DOI 10.1016/0360-1323(83)90001-X

IEA-ISO, 2007, SPEC ISO FOC WORLD E, P5

International Organization for Standardization, 2005, 77302005 ISO

\*ISO, 2004, 137902004 ISO

Jaggs M, 2000, ENER BUILDINGS, V31, P97, DOI 10.1016/S0378-7788(99)00023-7

Kellerer Hans, 2004, KNAPSACK PROBLEMS

Kolokotsa D, 2005, ENER BUILDINGS, V37, P93, DOI 10.1016/j.enbuild.2004.05.008

KOLOKOTSA D, 2001, P NTUA RENES C REN E

Krarti M., 2000, ENERGY AUDIT BUILDIN

Kreider JF, 2002, HEATING COOLING BUIL

Munda G, 2005, INT SER OPER RES MAN, V78, P953, DOI 10.1007/0-387-23081-5\_23  
 \*PREN CEN, 2006, PREN152512006 CEN  
 \*PREN CEN, 2005, 152172005 PREN CEN  
 Rey E, 2004, ENERG BUILDINGS, V36, P367, DOI 10.1016/j.enbuild.2004.01.015  
 Roulet CA, 2002, BUILD ENVIRON, V37, P579, DOI 10.1016/S0360-1323(02)00005-7  
 SCHRAGE L, 2001, OPTIMIZATION MODELLI  
 Siskos Y, 2005, INT SER OPER RES MAN, V78, P297, DOI 10.1007/0-387-23081-5\_8  
 Synnefa A, 2006, SOL ENERGY, V80, P968, DOI 10.1016/j.solener.2005.08.005  
 Wright JA, 2002, ENERG BUILDINGS, V34, P959, DOI 10.1016/S0378-7788(02)00071-3

NR 29

TC 134

Z9 134

U1 1

U2 35

PU ELSEVIER SCIENCE SA

PI LAUSANNE

PA PO BOX 564, 1001 LAUSANNE, SWITZERLAND

SN 0378-7788

J9 ENERG BUILDINGS

JI Energy Build.

PY 2008

VL 40

IS 9

BP 1747

EP 1754

DI 10.1016/j.enbuild.2008.03.002

PG 8

WC Construction & Building Technology; Energy & Fuels; Engineering, Civil

SC Construction & Building Technology; Energy & Fuels; Engineering

GA 322BH

UT WOS:000257349700015

DA 2018-05-03

ER

PT J

AU Newsham, GR

Bowker, BG

AF Newsham, Guy R.

Bowker, Brent G.

TI The effect of utility time-varying pricing and load control strategies  
 on residential summer peak electricity use: A review

SO ENERGY POLICY

LA English

DT Review

DE Demand response; Load shedding

AB Peak demand for electricity in North America is expected to grow, challenging electrical utilities to supply this demand in a cost-effective, reliable manner. Therefore, there is growing interest in strategies to reduce peak demand by eliminating electricity use, or shifting it to non-peak times. This strategy is commonly called "demand response". In households, common strategies are time-varying pricing, which charge more for energy use on peak, or direct load control, which allows utilities to curtail certain loads during high demand periods. We reviewed recent North American studies of these strategies. The data suggest that the most effective strategy is a critical peak price (CPP) program with enabling technology to automatically curtail loads on event days. There is little evidence that this causes substantial hardship for occupants, particularly if they have input into which loads are controlled and how, and have an override option. In such cases, a peak load reduction of at least 30% is a reasonable expectation. It might be possible to attain such load reductions without enabling technology by focusing on household types more likely to respond, and providing them with excellent support. A simple time-of-use (TOU) program can only expect

to realise on-peak reductions of 5%. Crown Copyright (C) 2010 Published by Elsevier Ltd. All rights reserved.

C1 [Newsham, Guy R.; Bowker, Brent G.] Natl Res Council Canada, Inst Res Construct Bldg M24, Ottawa, ON K1A 0R6, Canada.

RP Newsham, GR (reprint author), Natl Res Council Canada, Inst Res Construct Bldg M24, 1200 Montreal Rd, Ottawa, ON K1A 0R6, Canada.

EM guy.newsham@nrc-cnrc.gc.ca

RI Quezada, George/I-1106-2012

OI Quezada, George/0000-0002-4060-6109

FU Program of Energy Research and Development (PERD); National Research Council Canada

FX This work was funded by the Program of Energy Research and Development (PERD) administered by Natural Resources Canada (NRCAN), and by the National Research Council Canada. The authors are grateful to Prof. Ian Rowlands of the University of Waterloo for his guidance and input to the manuscript.

CR Charles River Associates, 2005, IMP EV CAL STAT PRIC

\*CLEARW RES INC, 2006, ID POW EMM STUD YEAR

Darby S, 2006, EFFECTIVENESS FEEDBA

EGANANNECHINO E, 2005, EN PROGR EV C NEW YO

Ericson T, 2009, ENER POLICY, V37, P3502, DOI 10.1016/j.enpol.2009.03.063

Faruqui A, 2008, QUANTIFYING BENEFITS

Faruqui A, 2009, HOUSEHOLD RESPONSE D

\*FERC, 2002, FERC727 GEN INF SECT

GEORGE SS, 2008, EX POSTLOAD IMPACT E

Greenberg D., 2008, DEMAND RESPONSE DELI

HAMMERSTROM DJ, 2007, PNNL17167 US DEP E 1

Hartway R, 1999, ENERGY, V24, P895, DOI 10.1016/S0360-5442(99)00040-7

HEBERLEIN TA, 1983, J ECON PSYCHOL, V4, P107, DOI DOI 10.1016/0167-4870(83)90048-X

Herter K, 2007, ENER POLICY, V35, P2121, DOI 10.1016/j.enpol.2006.06.019

\*ID POW, 2009, EN WAT CH TIM OF DAY

\*ID POW, 2008, 2007 EN WAT TM OF DA

\*ID POW, 2006, TIM OF DAY EN WATCH

\*IEADSM, IEA DEM SID MAN PROG

KAHNEMAN D, 1984, AM PSYCHOL, V39, P341, DOI 10.1037/0003-066X.39.4.341

Keuring Van Elektrotechnische Materialen (KEMA), 2006, 2005 SMART THERM PRO

\*KEMA, 2005, 2004 SMART THERM PRO

\*KEMA, 2008, FIN REP PACF GAS EL

KEMPTON W, 1992, ENER BUILDINGS, V18, P201, DOI 10.1016/0378-7788(92)90014-8

Kirby B., 2003, ORNLTM200319

LEVY R, 2002, 1006015 EPRI

NAVIGANT, 2008, EVALUATION TIME OF U

NEVIUS MJ, 2000, P ACEE SUMM STUD EN

Newsham G, 2009, INTELL BUILD INT, V1, P101, DOI 10.3763/inbi.2009.0004

\*ONT EN BOARD, 2008, EB20070086 ONT EN BO

Parker DS, 2009, ENER BUILDINGS, V41, P512, DOI 10.1016/j.enbuild.2008.11.017

PIETTE MA, 2005, LBNL58178

PORTER A, 2009, BRITAIN FACING BLACK

PUCKETT CD, 2006, AMERENUE RESIDENTIAL

PUCKETT CD, 2004, AMERENUE RESIDENTIAL

\*RLW AN, 2006, 2006 AN RES TIM AT D

Rocky Mountain Institute, 2006, AUT DEM RESP SYST PI

Rosenzweig M.B., 2003, ELECT J, V16, P11

Rowlands I. H., 2008, DEMAND RESPONSE ONTA

Strapp J, 2007, ONTARIO ENERGY BOARD

SULYMA I, 2008, P ACEEE SUMM STUD EN

\*SUMM BLUE, 2004, LOAD RED AN 2004 AIR

\*SUMM BLUE, 2006, EC 2005 EN SMART PRI

Summit Blue, 2007, EV 2006 EN SMART PRI  
 \*USDOE, 2009, PRES OB ANN 3 4 BILL  
 VIOLETTE D, 2007, FINAL REPORT MYPower  
 Wolak F.A., 2006, RESIDENTIAL CUSTOMER

NR 46

TC 127

Z9 129

U1 5

U2 34

PU ELSEVIER SCI LTD

PI OXFORD

PA THE BOULEVARD, LANGFORD LANE, KIDLINGTON, OXFORD OX5 1GB, OXON, ENGLAND

SN 0301-4215

EI 1873-6777

J9 ENER G POLICY

JI Energy Policy

PD JUL

PY 2010

VL 38

IS 7

BP 3289

EP 3296

DI 10.1016/j.enpol.2010.01.027

PG 8

WC Economics; Energy & Fuels; Environmental Sciences; Environmental Studies

SC Business & Economics; Energy & Fuels; Environmental Sciences & Ecology

GA 611SV

UT WOS:000278843700020

DA 2018-05-03

ER

PT J

AU Jakob, M

AF Jakob, M

TI Marginal costs and co-benefits of energy efficiency investments - The  
 case of the Swiss residential sector

SO ENERGY POLICY

LA English

DT Article

DE marginal costs; energy efficiency; co-benefits

AB Key elements of present investment decision-making regarding energy efficiency of new buildings and the refurbishment of existing buildings are the marginal costs of energy efficiency measures and incomplete knowledge of investors and architects about pricing, co-benefits and new technologies. This paper reports on a recently completed empirical study for the Swiss residential sector. It empirically quantifies the marginal costs of energy efficiency investments (i.e. additional insulation, improved window systems, ventilation and heating systems and architectural concepts). For the private sector, first results on the economic valuation of co-benefits such as improved comfort of living, improved indoor air quality, better protection against external noise, etc. may amount to the same order of magnitude as the energy-related benefits are given. The cost-benefit analysis includes newly developed technologies that show large variations in prices due to pioneer market pricing, add-on of learning costs and risk components of the installers. Based on new empirical data on the present cost-situation and past techno-economic progress, the potential of future cost reduction was estimated applying the experience curve concept. The paper shows, for the first time, co-benefits and cost dynamics of energy efficiency investments, of which decision makers in the real estate sector, politics and administrations are scarcely aware. (c) 2004 Elsevier Ltd. All rights reserved.

C1 ETH Zentrum, Swiss Fed Inst Technol, CEPE, CH-8092 Zurich, Switzerland.

RP Jakob, M (reprint author), ETH Zentrum, Swiss Fed Inst Technol, CEPE, WEC C, CH-8092 Zurich, Switzerland.



EM martin.jakob@cepe.mavt.ethz.ch  
CR AVASOO D, 1997, P ECEEE 1997 SUMM ST  
BINZ A, 2002, MINERGIE PASSIVHAUS  
BINZ A, 2000, B ETH ZURICH, V276, P28  
BORSANI C, 2003, ANALYSEBERICHT MINER  
BRUHLMANN K, 2001, ERHEBUNG DURCHSCHNIT  
\*EC, 2000, EXT LARMK VERK HED P  
Ecofys, 2002, CONTR MIN WOOL OTH T  
\*EMPA, 2003, EN CONS BUILD RES PI  
European Commission, 1999, EN EUR EC FDN EN POL  
Fanger P.O., 1970, THERMAL COMFORT  
HINZ E, 2001, ENERGETISCHE GEBAUDE  
IEA, 2000, EXP CURV EN TECHN PO  
JAFFE AB, 1994, RESOUR ENERGY ECON, V16, P91, DOI 10.1016/0928-7655(94)90001-9  
JAKOB M, 2003, ERHEBUNG ERNEUERUNG  
JAKOB M, 2003, 22 CEPE  
JAKOB M, 2002, GREZKOSTEN BEI FORCI  
Madlener R., 2004, INT J ENERGY TECHNOL, V2, P153  
JAKOB M, 2003, PROTECTION THERMIQUE  
Jakob M, 2003, WARMESCHUTZ BEI WOHN  
JOCHEM E, 2002, BAUEN SANIEREN WIRTS, P175  
\*KANT ZUR, 1998, EN 1998 BER REG EN  
\*METR, 1998, EN GES MIET VERM VER  
NEIJ L., 1997, ENERG POLICY, V23, P1099  
OTT W, 2004, DIREKTE INDIREKTE ZU  
\*SISH, 1997, MIN STAND EN BAUEN S  
WUEST H, 1994, BASISDATEN PERSPEKTI  
\*ZEN, 2003, EN UMW BAUW 12 SCHW  
NR 27  
TC 122  
Z9 124  
U1 3  
U2 38  
PU ELSEVIER SCI LTD  
PI OXFORD  
PA THE BOULEVARD, LANGFORD LANE, KIDLINGTON, OXFORD OX5 1GB, OXON, ENGLAND  
SN 0301-4215  
J9 ENERG POLICY  
JI Energy Policy  
PD JAN  
PY 2006  
VL 34  
IS 2  
BP 172  
EP 187  
DI 10.1016/j.enpol.2004.08.039  
PG 16  
WC Economics; Energy & Fuels; Environmental Sciences; Environmental Studies  
SC Business & Economics; Energy & Fuels; Environmental Sciences & Ecology  
GA 969UQ  
UT WOS:000232260900005  
DA 2018-05-03  
ER  
  
PT J  
AU Dubois, MC  
Blomsterberg, A  
AF Dubois, Marie-Claude

Blomsterberg, Ake

TI Energy saving potential and strategies for electric lighting in future

North European, low energy office buildings: A literature review

SO ENERGY AND BUILDINGS

LA English

DT Review

DE Office; Lighting; Daylight harvesting; Occupancy controls; Manual or automatic dimming; Potential electricity savings; Illuminance; Windows; Shading devices; Reflectance

ID PRIVATE OFFICES; CONTROL-SYSTEMS; WINDOW BLINDS; OCCUPANT USE; DAYLIGHT; ENVIRONMENT; CONSUMPTION; RESPONSES; DEMAND; DESIGN

AB This article presents key energy use figures and explores the energy saving potential for electric lighting in office buildings based on a review of relevant literature, with special emphasis on a North European context. The review reveals that theoretical calculations, measurements in full-scale rooms and simulations with validated lighting programs indicate that an energy intensity of around 10 kWh/m(2) yr is a realistic target for office electric lighting in future low energy office buildings. This target would yield a significant reduction in energy intensity of at least 50% compared to the actual average electricity use for lighting (21 kWh/m(2) yr in Sweden). Strategies for reducing energy use for electric lighting are presented and discussed, which include: improvements in lamp, ballast and luminaire technology, use of task/ambient lighting, improvement in maintenance and utilization factor, reduction of maintained illuminance levels and total switch-on time, use of manual dimming and switch-off occupancy sensors. Strategies based on daylight harvesting are also presented and the relevant design aspects such as effects of window characteristics, properties of shading devices, reflectance of inner surfaces, ceiling and partition height are discussed. (C) 2011 Elsevier B.V. All rights reserved.

C1 [Dubois, Marie-Claude; Blomsterberg, Ake] Lund Univ, Inst Architecture & Built Environm, Div Energy & Bldg Design, SE-22100 Lund, Sweden.

RP Dubois, MC (reprint author), Lund Univ, Inst Architecture & Built Environm, Div Energy & Bldg Design, POB 118, SE-22100 Lund, Sweden.

EM marie-claude.dubois@ebd.lth.se

FU SBUF (the development fund of the Swedish Building trade); CERBOF (Centre for energy and resource efficient construction and management of buildings); NCC Construction Sweden

FX The authors thank SBUF (the development fund of the Swedish Building trade), CERBOF (Centre for energy and resource efficient construction and management of buildings) and NCC Construction Sweden for funding this research project.

CR ASHLEY R, 1994, SOL ENERGY, V52, P75, DOI 10.1016/0038-092X(94)90083-E

Athienitis AK, 2002, SOL ENERGY, V72, P271, DOI 10.1016/S0038-092X(02)00016-6

Begemann SHA, 1997, INT J IND ERGONOM, V20, P231, DOI 10.1016/S0169-8141(96)00053-4

Begemann S.H.A., 1996, P CIBSE BATH, P141

Belysningsbranschen, 2008, UPPL SVER RAPP LAND

Bodart M, 2002, ENERB BUILDINGS, V34, P421, DOI 10.1016/S0378-7788(01)00117-7

Borg N., 2009, GUIDELINES INTEGRATI

Boyce PR, 2006, LIGHTING RES TECHNOL, V38, P358, DOI 10.1177/1477153506070994

Boyce P. R., 1973, Lighting Research and Technology, V5, P125

Boyce P.R., 1980, LIGHTING RES TECHNOL, V12, P195, DOI DOI 10.1177/096032718001200403

Boyce P., 1998, P DAYL 98 INT C DAYL, P359

Bulow-Hube H., 2008, EBDR0817 LUND U DEP

Bulow-Hube H., 2001, THESIS LUND U LUND

Christoffersen J, 1997, P 4 EUR C EN EFF LIG, V2, P245

Christoffersen J., 2005, MONITORING PROCEDURE

Chartered Institution of Building Services Engineers (CIBSE), 2005, OFF LIGHT GUID LG7

Clear RD, 2006, ENERB BUILDINGS, V38, P758, DOI 10.1016/j.enbuild.2006.03.011

Cowling I., 1990, LIGHT BRISBANE OFFIC

[Anonymous], EN EFF LIGHT GUID IN

Enkvist PA, 2007, MCKINSEY Q ONLINE J, V1

European Committee for Standardization (CEN), 2007, 151932007 CEN EN EUR

Farber Associates, 1992, OCC DAT THERM CALC N

- Figueiro M.G., 2004, LIGHTING DESIGN JAN
- Fotios SA, 2010, LIGHTING RES TECHNOL, V42, P433, DOI 10.1177/1477153509356018
- Galasiu AD, 2006, ENERGBUILDINGS, V38, P728, DOI 10.1016/j.enbuild.2006.03.001
- Galasiu AD, 2004, SOL ENERGY, V76, P523, DOI 10.1016/j.solener.2003.12.007
- Galasiu A.D., 2007, NRCC49498 I RES CONT
- Goven T., 2002, P RIGHT LIGHT 5 NIC, V5, P87
- Goven T., 2007, P 26 SESS CIE
- Gratia E, 2003, ENERGBUILDINGS, V35, P473, DOI 10.1016/S0378-7788(02)00160-3
- Guo X, 2010, LIGHTING RES TECHNOL, V42, P415, DOI 10.1177/1477153510376225
- Halonen L, 1995, PROCEEDINGS OF THE 23RD SESSION OF THE CIE, VOL 1, P200
- Hanselaer P, 2007, LIGHTING RES TECHNOL, V39, P171, DOI 10.1177/1365782807076737
- Hunt D.R.G., 1979, ENERGBUILDINGS, V14, P21
- Illuminating Engineering Society of North America, 2000, IESNA LIGHT HDB
- Inoue T., 1988, ASHRAE T, V94, P1049
- Jennings JD, 2000, J ILLUM ENG SOC, V29, P39, DOI 10.1080/00994480.2000.10748316
- Johnsen K., 2009, 200909 SBI
- Juslen H. T., 2005, Lighting Research & Technology, V37, P219, DOI 10.1191/1365782805li138oa
- Kuller R., 2004, PLANNING GOOD INDOOR, V14
- Lagoudi A, 1996, ENERGBUILDINGS, V24, P237, DOI 10.1016/S0378-7788(96)00983-8
- Laurentin C., 1998, P 3 INT C IND AIR QU, P175
- Lee E.S., 2007, LBNL57602
- Lindsay C.R.T., 1992, OCCUPANT USE VENETIA
- Loe D., 2003, GIR092 SOC LIGHT LIG
- Loe DL, 2009, LIGHTING RES TECHNOL, V41, P209, DOI 10.1177/1477153509338884
- Love J. A., 1998, LIGHTING RES TECHNOL, V30, P45, DOI DOI 10.1177/096032719803000107
- Maniccia D, 1999, J ILLUM ENG SOC, V28, P42, DOI 10.1080/00994480.1999.10748274
- Mardaljevic J, 2009, LIGHTING RES TECHNOL, V41, P261, DOI 10.1177/1477153509339703
- Mardaljevic J., 2006, EXAMPLES CLIMATEBASE
- Moore T., 2002, Lighting Research & Technology, V34, P207, DOI 10.1191/1365782802lt048oa
- Moore T., 2003, Lighting Research & Technology, V35, P43, DOI 10.1191/1477153503li061oa
- Moore T., 2001, P 9 EUR LIGHT C LUX, P234
- Newsham GR, 2008, LIGHTING RES TECHNOL, V40, P25, DOI 10.1177/1477153507081560
- Newsham GR, 1994, INDOOR ENVIRON, V3, P135
- Newsham GR, 2008, LEUKOS, V4, P139, DOI 10.1582/LEUKOS.2007.004.03.001
- Osterhaus WKE, 2005, SOL ENERGY, V79, P140, DOI 10.1016/j.solener.2004.11.011
- Osterhaus W.K.E., 2001, P LUX EUR 2001 9 EUR, P448
- Papamichael K., 2006, COST EFFECTIVE SIMPL, V3, P208
- Poirazis H, 2008, ENERGBUILDINGS, V40, P1161, DOI 10.1016/j.enbuild.2007.10.011
- Rea M., 2010, C EN EFF LIGHT HUM P
- REA MS, 1984, BUILD ENVIRON, V19, P133, DOI 10.1016/0360-1323(84)90038-6
- Rea M.S., 1998, P DAYL 98 C OTT CAN, P215
- Reinhart C. F., 2003, Lighting Research & Technology, V35, P243, DOI 10.1191/1365782803li064oa
- Reinhart C. F., 2002, P ACEEE SUMM STUD EN, P1
- Richards M, 2009, LIGHTING RES TECHNOL, V41, P285, DOI 10.1177/1477153509343493
- Robertson K., 2005, DAYLIGHTING GUIDE BU
- Rogers Z., 2006, DAYLIGHT METRIC DEV
- Rubin AI, 1978, NBS BUILDING SCI SER, V112
- Santamouris M., 2002, ENVIRONMENT, V37, P575
- SANTAMOURIS M, 1994, SOL ENERGY, V52, P59, DOI 10.1016/0038-092X(94)90081-C
- Scholz A, 2007, ANAESTHESIA, V62, P163, DOI 10.1111/j.1365-2044.2006.04912.x
- Swedish Standards Institute (SSI), 2002, 124641 SSI SSEN
- Statens energimyndigheten, 2010, EN VAR LOK RES FRAN
- Statens energimyndigheten, 2006, 1 STAT EN
- Stengard L., GLOBAL ENERGIFAKTA S
- Sutter Y, 2006, ENERGBUILDINGS, V38, P780, DOI 10.1016/j.enbuild.2006.03.010
- Svensson R., 2010, LJUS RUM PLANERINGSG
- Tenner A.D., 1997, P LUX EUR AMST NETH
- Tiller DK, 2010, LIGHTING RES TECHNOL, V42, P399, DOI 10.1177/1477153510375524

Traberg-Borup S., 2005, 200506 SBI  
 Tregenza P., 1974, LIGHTING RES TECHNOL, V6, P205  
 Tzempelikos A, 2007, SOL ENERGY, V81, P369, DOI 10.1016/j.solener.2006.06.015  
 van Bommel W. J. M., 2004, Lighting Research & Technology, V36, P255, DOI 10.1191/1365782804li122oa  
 Veitch JA, 2000, LIGHTING RES TECHNOL, V32, P199, DOI DOI 10.1177/096032710003200404  
 Veitch J.A., 1999, NEWSLETTER, V8, P4  
 Webb AR, 2006, ENERGBUILDINGS, V38, P721, DOI 10.1016/j.enbuild.2006.03.004  
 [Anonymous], 1991, CANADIAN LABOR COD 2  
 [Anonymous], 2000, OFFICIAL J EUROPEAN

NR 89

TC 114

Z9 114

U1 6

U2 70

PU ELSEVIER SCIENCE SA

PI LAUSANNE

PA PO BOX 564, 1001 LAUSANNE, SWITZERLAND

SN 0378-7788

EI 1872-6178

J9 ENERGBUILDINGS

JI Energy Build.

PD OCT

PY 2011

VL 43

IS 10

BP 2572

EP 2582

DI 10.1016/j.enbuild.2011.07.001

PG 11

WC Construction &amp; Building Technology; Energy &amp; Fuels; Engineering, Civil

SC Construction &amp; Building Technology; Energy &amp; Fuels; Engineering

GA 825QR

UT WOS:000295297700003

DA 2018-05-03

ER

PT J

AU Gram-Hanssen, K

AF Gram-Hanssen, Kirsten

TI Understanding change and continuity in residential energy consumption

SO JOURNAL OF CONSUMER CULTURE

LA English

DT Article

DE energy consumption; everyday life; practice theory; routines; technology

AB Practice theory has recently emerged within consumer studies as a promising approach that shifts focus from the individual consumer towards the collective aspects of consumption, and from spectacular and conspicuous dimensions of consumption towards routine and mundane aspects of consumption. Practice theory is, however, not a commonly agreed upon theory, but more like an approach, or a turn within contemporary social theory. When using practice theory in consumer studies, there are thus several conditions that need further clarification. The focus in this article is on how change and continuity in practices can be understood in practice theory. Discussions will include the balance between routinization and reflectivity as well as ways to understand the role of new technology in introducing change in consumer practices. One aspect of this is a discussion on how to include technologies and other types of material consumer goods in practice theory. Case studies on household energy consumption are used as an empirical basis for these discussions. Looking at household energy consumption through the theoretical lens of practice theory necessitates discussion on whether energy consumption should be viewed as one single practice or part of several different practices. The latter stimulates questioning on how these different consumer practices are related to each other horizontally and vertically, as parallel practices or as

different levels of practices, and whether changes in one practice affect (or refrain from affecting) other related consumer practices, whether through reflexivity, routines or the materiality of consumer goods.

C1 Univ Aalborg, Danish Bldg Res Inst, DK-2970 Horsholm, Denmark.

RP Gram-Hanssen, K (reprint author), Univ Aalborg, Danish Bldg Res Inst, Dr Neergaardsvej 15, DK-2970 Horsholm, Denmark.

EM kgh@sbi.dk

OI Gram-Hanssen, Kirsten/0000-0002-8543-2501

CR Bartiaux F, 2008, J CLEAN PROD, V16, P1170, DOI 10.1016/j.jclepro.2007.08.013

BOURDIEU Pierre, 1976, OUTLINE THEORY PRACT

Ehn B, 2009, TIME CONSUMPTION EVE, P99

GELLS FW, 2002, RES POLICY, V31, P1257

Giddens Anthony, 1984, CONSTITUTION SOC

Gram-Hanssen K, 2010, BUILD RES INF, V38, P175, DOI 10.1080/09613210903541527

Gram-Hanssen K, 2010, J IND ECOL, V14, P150, DOI 10.1111/j.1530-9290.2009.00194.x

Gram-Hanssen Kirsten, 2007, SUSTAINABILITY SCI P, V3, P15

GRAMHANSEN K, 2006, P ACEEE SUMM STUD EN, P12

Gronow J., 2001, ORDINARY CONSUMPTION

Halkier B., 2001, ORDINARY CONSUMPTION, P25

Ilmonen K., 2004, J CONSUM CULT, V4, P27

KEMP R, 2006, WORKSH SUST CONS RES

Lehtonen Turo-Kimmo, 2003, J CONSUM CULT, V3, P363, DOI DOI 10.1177/14695405030033014

Lupton D, 2002, J SOCIOL, V38, P5, DOI 10.1177/144078302128756453

Olesen B., 2004, DANSKE HJEM BLEV ELE

Reckwitz A, 2002, J THEOR SOC BEHAV, V32, P195, DOI 10.1111/1468-5914.00183

Reckwitz A., 2002, EUR J SOC THEORY, V5, P243, DOI [10.1177/13684310222225432, DOI 10.1177/13684310222225432]

Rip A., 1998, HUMAN CHOICE CLIMATE, V2

Schatzki T., 1996, SOCIAL PRACTICES WIT

Schatzki Theodore R, 2001, PRACTICE TURN CONT T

Schatzki Theodore R., 2002, SITE SOCIAL PHILOS A

Shove E., 2005, Journal of Consumer Culture, V5, P43, DOI 10.1177/1469540505049846

Shove E, 2007, DESIGN EVERYDAY LIFE

Shove E, 2003, COMFORT CLEANLINESS

Shove E, 2009, TIME CONSUMPTION EVE

Warde A, 2005, J CONSUM CULT, V5, P131, DOI DOI 10.1177/1469540505053090

Wilk R., 2009, TIME CONSUMPTION EVE

NR 28

TC 112

Z9 112

U1 3

U2 26

PU SAGE PUBLICATIONS LTD

PI LONDON

PA 1 OLIVERS YARD, 55 CITY ROAD, LONDON EC1Y 1SP, ENGLAND

SN 1469-5405

J9 J CONSUM CULT

JIJ. Consum. Cult.

PD MAR

PY 2011

VL 11

IS 1

SI SI

BP 61

EP 78

DI 10.1177/1469540510391725

PG 18

WC Cultural Studies; Sociology

SC Cultural Studies; Sociology

GA 767SC  
 UT WOS:000290875300004  
 DA 2018-05-03  
 ER

PT J

AU Ahmad, AS  
 Hassan, MY  
 Abdullah, MP  
 Rahman, HA  
 Hussin, F  
 Abdullah, H  
 Saidur, R

AF Ahmad, A. S.  
 Hassan, M. Y.  
 Abdullah, M. P.  
 Rahman, H. A.  
 Hussin, F.  
 Abdullah, H.  
 Saidur, R.

TI A review on applications of ANN and SVM for building electrical energy consumption forecasting

SO RENEWABLE & SUSTAINABLE ENERGY REVIEWS

LA English

DT Review

DE Forecasting; Building energy consumption; Artificial Neural Networks; GMDH; LSSVM

ID ARTIFICIAL NEURAL-NETWORKS; SUPPORT VECTOR MACHINES; CONSERVATION MEASURES; PREDICTION; DEMAND; LOAD; TEMPERATURE; CLIMATE; SYSTEM; GMDH

AB The rapid development of human population, buildings and technology application currently has caused electric consumption to grow rapidly. Therefore, efficient energy management and forecasting energy consumption for buildings are important in decision-making for effective energy saving and development in particular places. This paper reviews the building electrical energy forecasting method using artificial intelligence (AI) methods such as support vector machine (SVM) and artificial neural networks (ANN). Both methods are widely used in the field of forecasting and their aim on finding the most accurate approach is ever continuing. Besides the already existing single method of forecasting, the hybridization of the two forecasting methods has the potential to be applied for more accurate results. Further research works are currently ongoing, regarding the potential of hybrid method of Group Method of Data Handling (GMDH) and Least Square Support Vector Machine (LSSVM), or known as GLSSVM, to forecast building electrical energy consumption. (C) 2014 Elsevier Ltd. All rights reserved.

C1 [Ahmad, A. S.; Hassan, M. Y.; Abdullah, M. P.; Rahman, H. A.; Hussin, F.; Abdullah, H.] UTM, Fac Elect Engr, CEES, Skudai 81310, Johor, Malaysia.

[Saidur, R.] Univ Malaya, Dept Mech Engr, Fac Engr, Kuala Lumpur 50603, Malaysia.

RP Hassan, MY (reprint author), UTM, Fac Elect Engr, CEES, Skudai 81310, Johor, Malaysia.

EM yusrihutm@gmail.com

RI Abdul Rahman, Hasimah/D-3407-2015; Saidur, Rahman/B-7776-2010; abdullah, md pauzi/K-6762-2012; hassan, mohammad yusri/A-2242-2013

OI Abdul Rahman, Hasimah/0000-0001-8655-3818; Saidur, Rahman/0000-0002-2656-3034; abdullah, md pauzi/0000-0002-8357-731X; hassan, mohammad yusri/0000-0002-7952-0054

FU Malaysian Ministry of Higher Education; Universiti Teknologi Malaysia through Research University Grant (GUP) [vot 00G18]

FX This work was supported by the Malaysian Ministry of Higher Education and Universiti Teknologi Malaysia through Research University Grant (GUP) vot 00G18.

CR Afshar O, 2012, RENEW SUST ENERG REV, V16, P8

Baniyounes Ali M, 2013, RENEW SUST ENERG REV, P26

Aydinalp M, 2004, APPL ENERG, V79, P159, DOI 10.1016/j.apenergy.2003.12.006

- Aydinalp M, 2002, APPL ENERG, V71, P87, DOI 10.1016/S0306-2619(01)00049-6
- Azadeh A, 2008, ENER CONVERS MANAGE, V49, P2272, DOI 10.1016/j.enconman.2008.01.035
- Ben-Nakhi AE, 2004, ENER CONVERS MANAGE, V45, P2127, DOI 10.1016/j.enconman.2003.10.009
- Bessec M, 2008, ENER ECON, V30, P5
- Bo-Juen, 2004, IEEE T SYST, V19, P1821
- Cheng-Wen Y, 2010, P INT C FUT COMP COM
- Considine TJ, 2000, RESOUR ENERGY ECON, V22, P295, DOI 10.1016/S0928-7655(00)00027-0
- Council E.P.A., 2010, OFFICIAL J EUROPEAN, P13
- Darbellay GA, 2000, INT J FORECASTING, V16, P71, DOI 10.1016/S0169-2070(99)00045-X
- Dombayci OA, 2009, RENEW ENER, V34, P1158, DOI 10.1016/j.renene.2008.07.007
- Dong B, 2005, ENER BUILDINGS, V37, P545, DOI 10.1016/j.enbuild.2004.09.009
- Doukas H, 2007, BUILD ENVIRON, V42, P3562, DOI 10.1016/j.buildenv.2006.10.024
- Dounis AI, 2010, ADV BUILD ENERGY RES, V4, P267, DOI 10.3763/aber.2009.0408
- Edwards RE, 2012, ENER BUILDINGS, V49, P591, DOI 10.1016/j.enbuild.2012.03.010
- Elattar EE, 2012, IEEE T SYST MAN CY C, V42, P345, DOI 10.1109/TSMCC.2011.2109378
- Eric SBG, 1996, PREDICTION CONTROL U
- Fan S, 2006, IEEE T POWER SYST, V21, P392, DOI 10.1109/TPWRS.2005.860944
- Fasiuddin M, 2011, ENER BUILDINGS, V43, P3457, DOI 10.1016/j.enbuild.2011.09.004
- Ghiassi M, 2006, ELECT POWER SYST RES, V76
- Gonzalez PA, 2005, ENER BUILDINGS, V37, P595, DOI 10.1016/j.enbuild.2004.09.006
- Haniff MF, 2013, RENEW SUST ENER REV, V27, P94, DOI 10.1016/j.rser.2013.06.041
- Neto AH, 2008, ENER BUILDINGS, V40, P2169, DOI 10.1016/j.enbuild.2008.06.013
- Hou Z., 2009, INT SYSTEMS APPL, P1
- Iqbal I, 2007, BUILD ENVIRON, V42, P2166, DOI 10.1016/j.buildenv.2006.04.011
- Jain Amit, 2009, P IEEE POW TECH BUCH
- Johnsen TA, 2001, ENER ECON, V23, P227, DOI 10.1016/S0140-9883(00)00052-9
- Kalkan N, 2012, RENEW SUST ENER REV, V16, P6352, DOI 10.1016/j.rser.2012.07.014
- Kalogirou SA, 2000, APPL ENERG, V67, P17, DOI 10.1016/S0306-2619(00)00005-2
- Karatasou S, 2006, ENER BUILDINGS, V38, P949, DOI 10.1016/j.enbuild.2005.11.005
- Krarti M, 2003, J SOL ENER-T ASME, V125, P331, DOI 10.1115/1.1592186
- Lai F, 2008, INT J COMPUT MATH, V85, P1563, DOI 10.1080/00207160802033582
- Lee YS, 2011, KNOWL-BASED SYST, V24, P66, DOI 10.1016/j.knosys.2010.07.006
- Li F, 2009, ISA T, V48, P213, DOI 10.1016/j.isatra.2008.10.014
- Li KJ, 2011, ENER BUILDINGS, V43, P2893, DOI 10.1016/j.enbuild.2011.07.010
- Li Q., 2010, P 2010 INT C ADV EN, P223
- Li Q, 2009, APPL ENERG, V86, P2249, DOI 10.1016/j.apenergy.2008.11.035
- Li X, 2009, P AS PAC C INF PROC
- Li Xuemei, 2009, P IEEE AS PAC INF PR
- Mirasgedis S, 2006, ENERGY, V31, P208, DOI 10.1016/j.energy.2005.02.016
- Mohandes M, 2002, INT J ENER RES, V26, P335, DOI 10.1002/er.787
- Moral-Carcedo J, 2005, ENER ECON, V27, P477, DOI 10.1016/j.eneco.2005.01.003
- Mundi I, 2011, HIST DATA GRAPHS PER
- The Office of Public Affairs C.I.A, 2012, WORLD FACTBOOK
- Pao HT, 2009, ENERGY, V34, P1438, DOI 10.1016/j.energy.2009.04.026
- Pardo A, 2002, ENER ECON, V24, P55, DOI 10.1016/S0140-9883(01)00082-2
- Pedregal DJ, 2010, ENER CONVERS MANAGE, P51
- Perez-Lombard L, 2008, ENER BUILDINGS, V40, P394, DOI 10.1016/j.enbuild.2007.03.007
- Rahman MM, 2010, APPL ENERG, V87, P2994, DOI 10.1016/j.apenergy.2010.04.005
- Rezaeian-Zadeh M, 2012, THEOR APPL CLIMATOL, V109, P519, DOI 10.1007/s00704-012-0595-0
- RICARDO SZ, 1995, NATURAL ARTIFICIAL N, P1001
- Ruhaidah Samsudin, 2009, TIME SERIES FORECAST
- Ruhaidah Samsudin, 2008, J TEKNOL MAKLUMAT, V20, P113
- Ruhaidah Samsudin, 2009, INT J COMPUT INF SYS, V1, P170
- Ruhaidah Samsudin, 2010, International Journal of Research and Reviews in Applied Sciences, V3, P274
- Samsudin R, 2011, HYDROL EARTH SYST SC, V15, P1835, DOI 10.5194/hess-15-1835-2011
- Srinivasan D, 2008, NEUROCOMPUTING, V72, P625, DOI 10.1016/j.neucom.2008.08.006
- Suganthi L, 2012, RENEW SUST ENER REV, V16, P1223, DOI 10.1016/j.rser.2011.08.014
- Valor E, 2001, J APPL METEOROL, P40

VICINO A, 1987, INT J FORECASTING, V3, P313, DOI 10.1016/0169-2070(87)90012-4  
 Haifeng Wang Hu D, 2005, P IEEE INT C NEUR NE  
 Wang X, 2012, J COMPUT, V7, P1184  
 Wang YT, 2010, ADV MAT RES, V92, P1, DOI 10.4028/www.scientific.net/AMR.92.1  
 Wong SL, 2010, APPL ENERG, V87, P551, DOI 10.1016/j.apenergy.2009.06.028  
 Wu Junfang, 2009, P 2009 INT WORKSH CO  
 Wu X, 2009, CH CRC DATA MIN KNOW, P1, DOI 10.1201/9781420089653  
 Xu HY, 2012, ADV INTEL SOFT COMPU, V138, P27  
 Yang J, 2005, ENERG BUILDINGS, V37, P1250, DOI 10.1016/j.enbuild.2005.02.005  
 Yang L, 2008, APPL ENERG, V85, P800, DOI 10.1016/j.apenergy.2007.11.002  
 Yokoyama R, 2009, ENERG CONVERS MANAGE, V50, P319, DOI 10.1016/j.enconman.2008.09.017  
 Zhang GQ, 1998, INT J FORECASTING, V14, P35, DOI 10.1016/S0169-2070(97)00044-7  
 Zhang Xing-Ping, 2007, WSEAS Transactions on Mathematics, V6, P878  
 Zhao HX, 2012, RENEW SUST ENERG REV, V16, P3586, DOI 10.1016/j.rser.2012.02.049

NR 75

TC 109

Z9 113

U1 26

U2 128

PU PERGAMON-ELSEVIER SCIENCE LTD

PI OXFORD

PA THE BOULEVARD, LANGFORD LANE, KIDLINGTON, OXFORD OX5 1GB, ENGLAND

SN 1364-0321

J9 RENEW SUST ENERG REV

JI Renew. Sust. Energ. Rev.

PD MAY

PY 2014

VL 33

BP 102

EP 109

DI 10.1016/j.rser.2014.01.069

PG 8

WC GREEN & SUSTAINABLE SCIENCE & TECHNOLOGY; Energy & Fuels

SC Science & Technology - Other Topics; Energy & Fuels

GA AG4XO

UT WOS:000335423900011

DA 2018-05-03

ER

PT J

AU Haas, R

Schipper, L

AF Haas, R

Schipper, L

TI Residential energy demand in OECD-countries and the role of irreversible efficiency improvements

SO ENERGY ECONOMICS

LA English

DT Article

DE residential energy demand; irreversible efficiency improvements; energy policy

AB After undergoing substantial changes during a period of high energy prices, household energy demand did not rebound in times of declining energy prices as might have been expected. Hence, other factors, such as irreversible improvements in technical efficiency, must be understood in order to describe both past and future household energy demand. In this paper we consider irreversible efficiency improvements as a major reason for the moderate growth in energy demand after the plummeting of the oil price in 1985. We test different econometric models to take into account efficiency indicators. The major conclusions of our investigation are: (i) price elasticities are different for rising and falling prices - for the latter they are



close to zero, implying a low rebound-effect in the residential sector; (ii) technical efficiency is an important parameter for describing and forecasting energy demand; and (iii) income elasticities turn out to be higher once we incorporate indicators of technological efficiency in the process of estimating energy demand. (C) 1998 Elsevier Science B.V. All rights reserved.

C1 Vienna Tech Univ, Inst Energy Econ, A-1040 Vienna, Austria.

Lawrence Berkeley Lab, Berkeley, CA 94720 USA.

RP Haas, R (reprint author), Vienna Tech Univ, Inst Energy Econ, Gusshausstr 27-29-357, A-1040 Vienna, Austria.

CR CHOW GC, 1960, *ECONOMETRICA*, V28, P591, DOI 10.2307/1910133

Dargay J.M., 1992, *IRREVERSIBLE EFFECTS*

DUNSTAN RH, 1988, *ENERG ECON*, V10, P206, DOI 10.1016/0140-9883(88)90004-7

Gately D., 1992, *ENERGY J*, V13, P179, DOI DOI 10.5547/ISSN0195-6574-EJ-V0113-N04-10

GATELY D, 1993, *ENERGY J*, V14, P163

HOWARTH RB, 1991, *ENERG ECON*, V13, P135, DOI 10.1016/0140-9883(91)90046-3

HOWARTH RB, 1992, *STRUCTURE INTENSITY*

Khazzoom J., 1987, *ENERGY J*, V8, P85

KOURIS G, 1981, *ENERG ECON*, V3, P66, DOI 10.1016/0140-9883(81)90010-4

Pindyck R, 1991, *ECONOMETRIC MODELS E*

Pindyck R. S., 1979, *STRUCTURE WORLD ENER*

SCHIPPER L, 1989, *ANNU REV ENERGY*, V14, P273, DOI 10.1146/annurev.eg.14.110189.001421

Schipper L., 1985, *ENERGY J*, V6, P65

Schipper L, 1992, *ENERGY EFFICIENCY HU*

SCHIPPER L, 1993, *INT J GLOBAL ENERGY*, V5, P76

Schipper LJ, 1996, *MITIGATION ADAPTATIO*, V1, P167

Walker I.O., 1993, *ENERGY J*, V14, P183

WIRL F, 1991, *RESOUR ENERG*, V13, P241, DOI 10.1016/0165-0572(91)90008-Q

NR 18

TC 101

Z9 101

U1 1

U2 15

PU ELSEVIER SCIENCE BV

PI AMSTERDAM

PA PO BOX 211, 1000 AE AMSTERDAM, NETHERLANDS

SN 0140-9883

J9 *ENERG ECON*

JI Energy Econ.

PD SEP

PY 1998

VL 20

IS 4

BP 421

EP 442

DI 10.1016/S0140-9883(98)00003-6

PG 22

WC Economics

SC Business & Economics

GA 126HF

UT WOS:000076287300005

DA 2018-05-03

ER

PT J

AU Ouyang, JL

Hokao, K

AF Ouyang, Jinlong

Hokao, Kazunori

TI Energy-saving potential by improving occupants' behavior in urban

residential sector in Hangzhou City, China

SO ENERGY AND BUILDINGS

LA English

DT Article

DE Household lifestyle; Energy-saving potential; Improve; Electric  
appliance

ID CONSUMPTION INFORMATION-SYSTEM; THERMAL SIMULATION; BUILDINGS;  
ENVIRONMENT; ELECTRICITY; APPLIANCES; ISSUE

AB Besides technical measures, occupants' behavior is one of the most important issues with respect to energy efficiency in households. This paper will discuss the relationship between electricity consumption and household lifestyle and evaluate the energy-saving potential by improving occupants' behavior in domestic life through energy-saving education. After 124 households in three typical residential buildings in Hangzhou city of China being selected as research subjects, a series of surveys were conducted: (1) recording of the monthly electricity uses of all subject households from March 2007 to July 2008; (2) energy-saving education to the half of the households before July 2008; (3) a comprehensive survey about the household lifestyle of all subject households in the beginning of August 2008. By comparison analysis of the survey data, major findings are as follows: (1) residential electricity consumption will increase continually in the next years in China, because of the improvement of people's living standard and more dependency on electric appliances; (2) improving occupants' behavior in domestic life can save more than 10% household electricity use; and (3) some effort on residential energy savings should be shifted from technological measures to improving occupants' behavior in ordinary domestic life. Crown Copyright (c) 2009 Published by Elsevier B.V. All rights reserved.

C1 [Ouyang, Jinlong; Hokao, Kazunori] Saga Univ, Dept Civil Engn, Saga 8408502, Japan.

RP Hokao, K (reprint author), Saga Univ, Dept Civil Engn, Honjo 1, Saga 8408502, Japan.

EM ow761202@yahoo.com

CR Anker-Nilssen P, 2003, APPL ENERG, V76, P189, DOI 10.1016/S0306-2619(03)00056-4

Genjo K, 2005, ENERG BUILDINGS, V37, P259, DOI 10.1016/j.enbuild.2004.06.025

\*HANGZH STAT BUR, 2008, HANGZH STAT YB 2007

Tu M., 2007, ENERG POLICY, V35, P2978

Lam JC, 1998, ENERG CONVERS MANAGE, V39, P623, DOI 10.1016/S0196-8904(97)10008-5

Lopes L, 2005, ENERG BUILDINGS, V37, P698, DOI 10.1016/j.enbuild.2004.09.019

Meier A, 2004, ENERG BUILDINGS, V36, P1211, DOI 10.1016/enbuild.2003.10.011

Moser A, 2006, ENERG BUILDINGS, V38, P1293, DOI 10.1016/j.enbuild.2006.04.002

Nakagami H, 1996, ENERGY, V21, P1157, DOI 10.1016/0360-5442(96)00071-0

Ouyang JL, 2007, J S CHINA U TECH V S, V35, P171

Ouyang J, 2008, J ASIAN ARCHIT BUILD, V7, P395, DOI 10.3130/jaabe.7.395

Ouyang JL, 2009, ENERG POLICY, V37, P140, DOI 10.1016/j.enpol.2008.07.041

Ueno T, 2006, APPL ENERG, V83, P868, DOI 10.1016/j.apenergy.2005.09.004

Ueno T, 2006, APPL ENERG, V83, P166, DOI 10.1016/j.apenergy.2005.02.002

Wood G, 2003, ENERG BUILDINGS, V35, P821, DOI 10.1016/S0378-7788(02)00241-4

NR 15

TC 97

Z9 105

U1 13

U2 44

PU ELSEVIER SCIENCE SA

PI LAUSANNE

PA PO BOX 564, 1001 LAUSANNE, SWITZERLAND

SN 0378-7788

J9 ENERG BUILDINGS

JI Energy Build.

PD JUL

PY 2009

VL 41

IS 7

BP 711

EP 720

DI 10.1016/j.enbuild.2009.02.003

PG 10

WC Construction & Building Technology; Energy & Fuels; Engineering, Civil

SC Construction & Building Technology; Energy & Fuels; Engineering

GA 455OD

UT WOS:000266769500002

DA 2018-05-03

ER

PT J

AU Jain, RK

Smith, KM

Culligan, PJ

Taylor, JE

AF Jain, Rishree K.

Smith, Kevin M.

Culligan, Patricia J.

Taylor, John E.

TI Forecasting energy consumption of multi-family residential buildings using support vector regression: Investigating the impact of temporal and spatial monitoring granularity on performance accuracy

SO APPLIED ENERGY

LA English

DT Article

DE Forecasting; Machine learning; Monitoring; Prediction; Residential building; Support vector regression

ID ARTIFICIAL NEURAL-NETWORKS; OCCUPANT BEHAVIOR; PREDICTION; MACHINES; SYSTEM; LOAD

AB Buildings are the dominant source of energy consumption and environmental emissions in urban areas. Therefore, the ability to forecast and characterize building energy consumption is vital to implementing urban energy management and efficiency initiatives required to curb emissions. Advances in smart metering technology have enabled researchers to develop "sensor based" approaches to forecast building energy consumption that necessitate less input data than traditional methods. Sensor-based forecasting utilizes machine learning techniques to infer the complex relationships between consumption and influencing variables (e.g., weather, time of day, previous consumption). While sensor-based forecasting has been studied extensively for commercial buildings, there is a paucity of research applying this data-driven approach to the multi-family residential sector. In this paper, we build a sensor-based forecasting model using Support Vector Regression (SVR), a commonly used machine learning technique, and apply it to an empirical data-set from a multi-family residential building in New York City. We expand our study to examine the impact of temporal (i.e., daily, hourly, 10 min intervals) and spatial (i.e., whole building, by floor, by unit) granularity have on the predictive power of our single-step model. Results indicate that sensor based forecasting models can be extended to multi-family residential buildings and that the optimal monitoring granularity occurs at the by floor level in hourly intervals. In addition to implications for the development of residential energy forecasting models, our results have practical significance for the deployment and installation of advanced smart metering devices. Ultimately, accurate and cost effective wide-scale energy prediction is a vital step towards next-generation energy efficiency initiatives, which will require not only consideration of the methods, but the scales for which data can be distilled into meaningful information. (C) 2014 Elsevier Ltd. All rights reserved.

C1 [Jain, Rishree K.] NYU, Ctr Urban Sci & Progress, Brooklyn, NY 11201 USA.

[Smith, Kevin M.] Columbia Univ, Dept Earth & Environm Engr, New York, NY 10027 USA.

[Culligan, Patricia J.] Columbia Univ, Dept Civil Engr & Engr Mech, Inst Data Sci & Engr, New York, NY 10027 USA.

[Taylor, John E.] Virginia Tech, Dept Civil & Environm Engr, Blacksburg, VA 24061 USA.

RP Jain, RK (reprint author), NYU, Ctr Urban Sci & Progress, 1 MetroTech Ctr, 19th Floor, Brooklyn, NY 11201 USA.

EM rishee.jain@nyu.edu; kms2227@columbia.edu; pjc2104@columbia.edu; jet@vt.edu

FU National Science Foundation [1142379, 0903597]

FX This material is based in part upon work supported by the National

Science Foundation under Grant Nos. 1142379 and 0903597. Any opinions, findings, and conclusions or recommendations expressed in this material are those of the authors and do not necessarily reflect the views of the National Science Foundation. The authors would like to thank Rimas Gulbinas and Amy Tang for their support in the development and launch of this study.

- CR Chang CC, 2011, ACM T INTEL SYST TEC, V2, DOI 10.1145/1961189.1961199  
 Dong B, 2005, ENERG BUILDINGS, V37, P545, DOI 10.1016/j.enbuild.2004.09.009  
 Drucker H, 1997, ADV NEUR IN, V9, P155  
 Edwards RE, 2012, ENERG BUILDINGS, V49, P591, DOI 10.1016/j.enbuild.2012.03.010  
 Emery AF, 2006, ENERGY, V31, P677, DOI 10.1016/j.energy.2005.04.006  
 ESPINOZA M, 2006, COMPUTATIONAL MANAGE, V3, P113, DOI DOI 10.1007/S10287-005-0003-7  
 Gulbinas R, 2014, J COMPUT CIVIL ENG, V28, P89  
 Howard B, 2012, ENERG BUILDINGS, V45, P141, DOI 10.1016/j.enbuild.2011.10.061  
 Karatasou S, 2006, ENERG BUILDINGS, V38, P949, DOI 10.1016/j.enbuild.2005.11.005  
 Kavaklioglu K, 2011, APPL ENERG, V88, P368, DOI 10.1016/j.apenergy.2010.07.021  
 Kohavi R., 1995, INT JOINT C ART INT, V2, P1137  
 Kolter JZ, P 25 AAAI C ART INT, P1349  
 Kreider JF, 1994, US ASHRAE J AM SOC H, P36  
 Kusiak A, 2012, ENERGY, V42, P241, DOI 10.1016/j.energy.2012.03.063  
 Li KJ, 2011, ENERG BUILDINGS, V43, P2893, DOI 10.1016/j.enbuild.2011.07.010  
 Li Q, 2009, APPL ENERG, V86, P2249, DOI 10.1016/j.apenergy.2008.11.035  
 Li Q, 2009, ENERG CONVERS MANAGE, V50, P90, DOI 10.1016/j.enconman.2008.08.033  
 Lu X, 2014, APPL ENERG, V114, P91  
 MacKay D.J.C., 1994, ASHRAE T, P1053  
 Pedregosa F, 2011, J MACH LEARN RES, V12, P2825  
 Petersen S, 2010, ENERG BUILDINGS, V42, P1113, DOI 10.1016/j.enbuild.2010.02.002  
 PlaNYC, 2013, PLANYC GREEN BUILDIN  
 Ruas GIS, 2008, 3 INT S COMM CONTR S  
 U.S. Department of Energy, 2013, BUILD EN DAT BOOK  
 Vapnik V. N., 2000, NATURE STAT LEARNING  
 Venkatesan N, 2012, APPL ENERG, V96, P84, DOI 10.1016/j.apenergy.2011.12.076  
 Virote J, 2012, ENERG BUILDINGS, V53, P183, DOI 10.1016/j.enbuild.2012.06.001  
 Wong SL, 2010, APPL ENERG, V87, P551, DOI 10.1016/j.apenergy.2009.06.028  
 Yang J, 2005, ENERG BUILDINGS, V37, P1250, DOI 10.1016/j.enbuild.2005.02.005  
 Yu Z, 2011, ENERG BUILDINGS, V43, P1409, DOI 10.1016/j.enbuild.2011.02.002  
 Zhang WY, 2012, ENERGY, V45, P850, DOI 10.1016/j.energy.2012.07.006  
 Zhao HX, 2012, RENEW SUST ENERG REV, V16, P3586, DOI 10.1016/j.rser.2012.02.049  
 Zhao H.-x., 2012, J ALGORITHMS COMPUT, V6, P59
- NR 33  
 TC 95  
 Z9 96  
 U1 10  
 U2 71  
 PU ELSEVIER SCI LTD  
 PI OXFORD  
 PA THE BOULEVARD, LANGFORD LANE, KIDLINGTON, OXFORD OX5 1GB, OXON, ENGLAND  
 SN 0306-2619  
 EI 1872-9118  
 J9 APPL ENERG  
 JI Appl. Energy  
 PD JUN 15  
 PY 2014  
 VL 123  
 SI SI  
 BP 168  
 EP 178  
 DI 10.1016/j.apenergy.2014.02.057

PG 11

WC Energy & Fuels; Engineering, Chemical

SC Energy & Fuels; Engineering

GA AH3IR

UT WOS:000336017400017

DA 2018-05-03

ER

PT J

AU Nair, G

Gustavsson, L

Mahapatra, K

AF Nair, Gireesh

Gustavsson, Leif

Mahapatra, Krushna

TI Factors influencing energy efficiency investments in existing Swedish residential buildings

SO ENERGY POLICY

LA English

DT Article

DE Building envelope measures; Energy efficiency investment measures; Homeowners

ID PSYCHOLOGICAL-RESEARCH; POLICY INSTRUMENTS; HEATING-SYSTEMS; CONSERVATION; BEHAVIOR; DETERMINANTS; CONSUMPTION; STRATEGIES; DIFFUSION; PATTERNS

AB We used the data from a survey conducted in 2008 of 3,000 owners of detached houses to analyse the factors that influence the adoption of investment measures to improve the energy efficiency of their buildings. For the majority of Swedish homeowners, it was important to reduce their household energy use, and most of them undertook no-cost measures as compared to investment measures. Personal attributes such as income, education, age and contextual factors, including age of the house, thermal discomfort, past investment, and perceived energy cost, influence homeowners' preference for a particular type of energy efficiency measure. The implications for promoting the implementation of energy efficiency investment measures are discussed. (C) 2010 Elsevier Ltd. All rights reserved.

C1 [Nair, Gireesh; Gustavsson, Leif; Mahapatra, Krushna] Mid Sweden Univ, SE-83125 Ostersund, Sweden.

RP Nair, G (reprint author), Mid Sweden Univ, SE-83125 Ostersund, Sweden.

EM gireesh.nair@miun.se

RI Mahapatra, Krushna/C-2649-2013

OI Mahapatra, Krushna/0000-0003-4405-1056

FU Swedish Energy Agency; European Union

FX The authors gratefully acknowledge the financial support of the Swedish Energy Agency and the European Union. We are also thankful to the anonymous reviewers for their comments on the earlier version of this paper.

CR Barr S, 2005, ENER POLICY, V33, P1425, DOI 10.1016/j.enpol.2003.12.016

Bartiaux F., 2006, SOCIOTECHNICAL FACTO

BELL M, 2004, RICS COBRA C 7 8 SEP

BERRY LG, 1997, ORNLCON450

BLACK JS, 1985, J APPL PSYCHOL, V70, P3, DOI 10.1037//0021-9010.70.1.3

Butler G., 1995, MANAGING YOUR MIND M

Carlsson Kanyama, 2005, INT J CONSUM STUD, V29, P239, DOI [10.1111/j.1470-6431.2005.00409.x, DOI 10.1111/J.1470-6431.2005.00409.X]

COSTANZO M, 1986, AM PSYCHOL, V41, P521, DOI 10.1037/0003-066X.41.5.521

Council of the European Union, 2009, PROP DIR EUR PARL CO

Darby S, 2006, ENER POLICY, V34, P2929, DOI 10.1016/j.enpol.2005.04.013

DARLEY JM, 1981, J SOC ISSUES, V37, P150, DOI 10.1111/j.1540-4560.1981.tb02630.x

DILLMAN DA, 1983, J ECON PSYCHOL, V3, P299, DOI 10.1016/0167-4870(83)90008-9

Eurobarometer, 2008, EUR ATT CLIM CHANG

Eurobarometer, 2007, EN TECHN KNOWL PERC

FORSTATER M, 2007, ASSURES CONSUMERS CL  
 FUCHS L, 2004, NONENERGY BENEFITS N  
 Gardner G. T., 2002, ENV PROBLEMS HUMAN B  
 Gatersleben B, 2002, ENVIRON BEHAV, V34, P335, DOI 10.1177/0013916502034003004  
 GELLER ES, 1981, J CONSUM RES, V8, P331, DOI 10.1086/208872  
 Goldsmith DJ, 1997, HUM COMMUN RES, V23, P454, DOI 10.1111/j.1468-2958.1997.tb00406.x  
 Gustavsson L, 2007, ENERGBUILDINGS, V39, P717, DOI 10.1016/j.enbuild.2006.06.014  
 Hawkins David I., 2007, CONSUMER BEHAV BUILD  
 HELD M, 1983, J ECON PSYCHOL, V3, P379, DOI 10.1016/0167-4870(83)90013-2  
 HERRING H, 2007, ECEEE SUMMER STUDIES  
 IEA, 2008, EN POL IEA COUNTR SW  
 JAGEMAR L, 2009, ENERGIEFFEKTIVISERIN  
 JANSON U, 2008, THESIS LUND U LUND  
 KAHNEMAN D, 1979, ECONOMETRICA, V47, P263, DOI 10.2307/1914185  
 KEMPTON W, 1992, AM PSYCHOL, V47, P1213, DOI 10.1037//0003-066X.47.10.1213  
 Kempton W., 1985, MARRIAGE FAM REV, V9, P115, DOI DOI 10.1300/J002V09N01\_07  
 Linden AL, 2006, ENERGPOLICY, V34, P1918, DOI 10.1016/j.enpol.2005.01.015  
 Long J. E., 1993, ENERGY ECONOMICS, P232  
 Mahapatra K, 2009, INT SCI C EN SYST IT  
 Mahapatra K, 2008, ENERGPOLICY, V36, P577, DOI 10.1016/j.enpol.2007.10.006  
 Mayer PC, 1996, CONTEMP ECON POLICY, V14, P116, DOI 10.1111/j.1465-7287.1996.tb00608.x  
 NAIR G, 2009, INT SCI C EN SYST IT  
 Nassen J, 2008, ENERGPOLICY, V36, P3814, DOI 10.1016/j.enpol.2008.07.018  
 \*NAT, 2008, 5905 SWED ENV PROT A  
 Neuman W. L., 2000, SOCIAL RES METHODS  
 NILSSEN AP, 2003, APPL ENERGB, V76, P189  
 NILSSON J, 2004, CHOICE NEW HEATING S  
 Nilsson JS, 2003, APPL ENERGB, V76, P179, DOI 10.1016/S0306-2619(03)00062-X  
 OLSEN ME, 1983, J ECON PSYCHOL, V4, P183, DOI 10.1016/0167-4870(83)90052-1  
 OWEN F, 1994, STAT  
 PALMBORG C, 1986, ENERGY, V11, P643, DOI 10.1016/0360-5442(86)90144-1  
 Poortinga W, 2003, J ECON PSYCHOL, V24, P49, DOI 10.1016/S0167-4870(02)00154-X  
 Rehdanz K, 2007, ENERGECON, V29, P167, DOI 10.1016/j.eneco.2006.04.002  
 RITCHIE JRB, 1981, J CONSUM RES, V8, P233, DOI 10.1086/208860  
 Rogers E., 2003, DIFFUSION INNOVATION  
 Sardianou E, 2007, ENERGPOLICY, V35, P3778, DOI 10.1016/j.enpol.2007.01.020  
 \*SCB, 2009, YB HOUS BUILD STAT 2  
 Sorrell S., 2007, REBOUND EFFECT ASSES  
 \*STEM, 2008, EN SWED FACTS FIG 20  
 STERN PC, 1981, AM PSYCHOL, V36, P329, DOI 10.1037/0003-066X.36.4.329  
 Stoft SE, 1995, ENERGY J, V16, P109  
 Urge-Vorsatz D, 2001, ENERGPOLICY, V29, P801, DOI 10.1016/S0301-4215(01)00013-1  
 Urge-Vorsatz D, 2007, BUILD RES INF, V35, P458, DOI 10.1080/09613210701327384  
 VINTERBACK J, 2000, THESIS SWEDISH U AGR  
 YATES SM, 1983, AM PSYCHOL, V38, P435, DOI 10.1037/0003-066X.38.4.435  
 Zelezny LC, 2000, J SOC ISSUES, V56, P443, DOI 10.1111/0022-4537.00177  
 NR 60  
 TC 92  
 Z9 93  
 U1 2  
 U2 33  
 PU ELSEVIER SCI LTD  
 PI OXFORD  
 PA THE BOULEVARD, LANGFORD LANE, KIDLINGTON, OXFORD OX5 1GB, OXON, ENGLAND  
 SN 0301-4215  
 J9 ENERGPOLICY  
 JI Energy Policy  
 PD JUN

PY 2010

VL 38

IS 6

BP 2956

EP 2963

DI 10.1016/j.enpol.2010.01.033

PG 8

WC Economics; Energy & Fuels; Environmental Sciences; Environmental Studies

SC Business & Economics; Energy & Fuels; Environmental Sciences & Ecology

GA 601JS

UT WOS:000278055700047

DA 2018-05-03

ER

PT J

AU Schleich, J

AF Schleich, Joachim

TI Barriers to energy efficiency: A comparison across the German commercial and services sector

SO ECOLOGICAL ECONOMICS

LA English

DT Article

DE Energy efficiency; Energy consumption; Energy policy; Organizational investment behaviour; Technology diffusion

ID DECISION-MAKING; MARKET; POLICY; CONSERVATION; ECONOMICS; INVESTMENTS; DISCOUNT; FIRMS; RISK

AB Based on a large sample for the German commercial and services sector, this paper econometrically assesses the relevance of various types of barriers to energy efficiency at the sectoral level and across fifteen subsectors. The results at the level of entire sectors suggest that the lack of information about energy consumption patterns and about energy efficiency measures, lack of staff time, priority setting within organizations, and - in particular - the investor/user dilemma are all relevant barriers. Allowing for sector-specific differences in the relevance of these individual barriers yields a more heterogeneous picture. The numbers and types of relevant barriers vary across sub-sectors, and the majority of sub-sectors are subject to relatively few barriers. The statistically most significant barriers are found for the sub-sector of public administrations. These findings are robust, independent of whether the definition of an organization's energy efficiency performance includes only measures that have actually been realized or also those that are being planned. For planned projects, however, organizations appear to underestimate internal priority setting as a barrier to energy efficiency. (C) 2009 Elsevier B.V. All rights reserved.

C1 [Schleich, Joachim] Fraunhofer Inst Syst & Innovat Res Fraunhofer ISI, D-76139 Karlsruhe, Germany. [Schleich, Joachim] Virginia Polytech Inst & State Univ, Blacksburg, VA 24061 USA.

RP Schleich, J (reprint author), Fraunhofer Inst Syst & Innovat Res Fraunhofer ISI, Breslauer Str 48, D-76139 Karlsruhe, Germany.

EM joachim.schleich@isi.fraunhofer.de

OI Schleich, Joachim/0000-0001-6079-7240

CR AKERLOF GA, 1970, Q J ECON, V84, P488, DOI 10.2307/1879431

\*ARB EN, 2006, AUSW EN DTSCH 1990 2

Ben-David S, 2000, LAND ECON, V76, P590, DOI 10.2307/3146954

\*BMU, 2007, REV NAT ALL 2008 201

Brechling V, 1994, FISCAL STUDIES, V15, P44, DOI DOI 10.1111/J.1475-5890.1994.TB00196.X

Brown MA, 2001, ENER POLICY, V29, P1197, DOI 10.1016/S0301-4215(01)00067-2

Butler R., 1993, STRATEGIC INVESTMENT

Christophe CARR, 1998, MANAGEMENT ACCOUNTIN, V9, P213, DOI DOI 10.1006/MARE.1998.0075

Coase Ronald, 1991, NATURE FIRM ORIGINS, P18

Cooremans C., 2007, P 2007 ECEEE SUMM ST

de Almeida ELF, 1998, ENER POLICY, V26, P643, DOI 10.1016/S0301-4215(98)00023-8

de Groot HLF, 2001, ENER ECON, V23, P717, DOI 10.1016/S0140-9883(01)00083-4

DeCanio SJ, 1998, REV ECON STAT, V80, P95, DOI 10.1162/003465398557366

DeCanio SJ, 1998, ENER POLICY, V26, P441, DOI 10.1016/S0301-4215(97)00152-3

DECANIO SJ, 1994, J ECON BUS, V1, P105  
 Dixit A. K., 1994, INVESTMENT UNCERTAIN  
 [Anonymous], 2006, ACT PLAN EN EFF REAL  
 GEIGER B, 1999, ENERGIEVERBRAUCH ENE  
 Golove W., 1996, LBL38059 U CAL  
 GRUBER E, 1991, ENER G POLICY, V19, P279, DOI 10.1016/0301-4215(91)90152-E  
 HASSETT KA, 1993, ENER G POLICY, V21, P710, DOI 10.1016/0301-4215(93)90294-P  
 HOLMSTROM B, 1979, BELL J ECON, V10, P74, DOI 10.2307/3003320  
 HOWARTH RB, 1993, ENER G ECON, V15, P262, DOI 10.1016/0140-9883(93)90016-K  
 HOWARTH RB, 1995, CONTEMP ECON POLICY, V13, P101, DOI 10.1111/j.1465-7287.1995.tb00726.x  
 JAFFE AB, 1994, ENER G POLICY, V22, P804, DOI 10.1016/0301-4215(94)90138-4  
 JAFFE AB, 1994, ENERGY J, V15, P43  
 JOCHEM E, 1990, ENER G POLICY, V18, P340, DOI 10.1016/0301-4215(90)90192-7  
 MCDONALD R, 1986, Q J ECON, V101, P707, DOI 10.2307/1884175  
 Metz B, 2007, CLIMATE CHANGE 2007  
 Mills E, 2003, ENER G POLICY, V31, P273, DOI 10.1016/S0301-4215(02)00040-X  
 Morgan G., 1985, IMAGES ORG  
 Newell RG, 1999, Q J ECON, V114, P941, DOI 10.1162/003355399556188  
 Schleich J, 2008, ENER G ECON, V30, P449, DOI 10.1016/j.eneco.2006.08.004  
 Scott S, 1997, ENER G ECON, V19, P187, DOI 10.1016/S0140-9883(96)01000-6  
 SIMON HA, 1959, AM ECON REV, V49, P253  
 Sorrell S, 2003, ENER G POLICY, V31, P865, DOI 10.1016/S0301-4215(02)00130-1  
 STERN PC, 1986, J POLICY ANAL MANAG, V5, P200, DOI 10.2307/3323541  
 Sutherland RJ, 1996, ENER G POLICY, V24, P361, DOI 10.1016/0301-4215(95)00136-0  
 Teece DJ, 1997, STRATEGIC MANAGE J, V18, P509, DOI 10.1002/(SICI)1097-0266(199708)18:7<509::AID-SMJ882>3.0.CO;2-Z

NR 39

TC 91

Z9 92

U1 1

U2 27

PU ELSEVIER SCIENCE BV

PI AMSTERDAM

PA PO BOX 211, 1000 AE AMSTERDAM, NETHERLANDS

SN 0921-8009

J9 ECOL ECON

JI Ecol. Econ.

PD MAY 15

PY 2009

VL 68

IS 7

BP 2150

EP 2159

DI 10.1016/j.ecolecon.2009.02.008

PG 10

WC Ecology; Economics; Environmental Sciences; Environmental Studies

SC Environmental Sciences & Ecology; Business & Economics

GA 450HZ

UT WOS:000266392900027

DA 2018-05-03

ER

PT J

AU Bordass, B

Cohen, R

Standeven, M

Leaman, A

AF Bordass, B



Cohen, R  
 Standeven, M  
 Leaman, A

TI Assessing building performance in use 3: energy performance of the Probe buildings

SO BUILDING RESEARCH AND INFORMATION

LA English

DT Article

DE benchmarks; carbon dioxide emissions; energy consumption; metering; post-occupancy surveys; sustainability; unintended consequences; United Kingdom

AB By early 1999, the Probe series of post-occupancy studies had reported individually on 16 buildings. This paper compares their energy performance and carbon emissions (for technical performance and occupant satisfaction, see papers 2 and 4 in this issue). All but one building (which paradoxically used the least energy of Probe's air-conditioned offices) claimed to be energy efficient, but achieved performance ranged from excellent to below average. Across the sample, there was a factor of six in carbon dioxide emissions per unit floor area, and even more per occupant. The air-conditioned buildings tended to use the most energy: they usually contained more equipment, were more intensively occupied, but also usually ran more liberally and wastefully - as did more complex systems generally. Often complication seemed to have been added before the fundamentals had been made efficient. Design objectives were also frustrated by poor airtightness, control problems, unintended consequences, a dearth of energy management, and a tendency for systems to default to 'on' - also a pathological trend for information technology and its associated cooling demands. Solutions include load reduction, 'gentle engineering', better matches between demand and supply, and predictions based on a better understanding of in-use performance.

C1 William Bordass Associates, London NW1 8JJ, England.

Energy Sustainable Dev, Overmoor Farm, Corsham SN13 9TZ, Wilts, England.

Bldg Use Studies Ltd, London W1P 3PA, England.

RP Bordass, B (reprint author), William Bordass Associates, 10 Princess Rd, London NW1 8JJ, England.

CR \*ARUP R D, 1992, PASS SOL MEAS AIR CO

Bordass W., 2001, BUILD RES INF, V29, P144

BORDASS W, 2001, BUILDING RES INFORMA, V29, P103

\*CIBSE, 1999, 22 CIBSE

Cohen R, 2001, BUILD RES INF, V29, P85, DOI 10.1080/09613210010008018

Curwell S, 1999, BUILD RES INF, V27, P286, DOI 10.1080/096132199369390

\*DETR, 1998, 106 DETR BRECSU EN E

\*DETR, 1991, 21 DETR BRECSU

\*DETR, 1993, EN CONS GUID

\*DETR, 2000, EN CONS GUID, V19

ELEY J, 1996, FACILITIES MANAGEMEN, V1, P11

Leaman A, 2001, BUILD RES INF, V29, P129, DOI 10.1080/09613210010008045

OLIVIER J, 1996, 38 EN EFF BEST PRACT

OLIVIER J, 1996, 39 EN EFF BEST PRACT

1997, BUILDING SERVICE SEP, P39

NR 15

TC 91

Z9 92

U1 2

U2 10

PU E & FN SPON

PI LONDON

PA 2-6 BOUNDARY ROW, LONDON SE1 8HN, ENGLAND

SN 0961-3218

J9 BUILD RES INF

J1 Build. Res. Informat.

PY 2001

VL 29

IS 2

BP 114

EP 128  
 DI 10.1080/09613210010008036  
 PG 15  
 WC Construction & Building Technology  
 SC Construction & Building Technology  
 GA 418LM  
 UT WOS:000167893700004  
 DA 2018-05-03  
 ER

PT J  
 AU Mills, B  
 Schleich, J  
 AF Mills, Bradford  
 Schleich, Joachim

TI Residential energy-efficient technology adoption, energy conservation,  
 knowledge, and attitudes: An analysis of European countries

SO ENERGY POLICY

LA English

DT Article

DE Household energy-efficiency; Technology adoption; Energy conservation

ID UNITED-STATES; BEHAVIOR; CONSUMPTION; DETERMINANTS; HOUSEHOLDS;  
 VALUATION; PATTERNS; SWEDEN

AB Relationships between measures of household energy use behavior and household characteristics are estimated using a unique dataset of approximately 5000 households in 10 EU countries and Norway. Family age-composition patterns are found to have a distinct impact on household energy use behavior. Households with young children are more likely to adopt energy-efficient technologies and energy conservation practices and place primary importance on energy savings for environmental reasons. By contrast, households with a high share of elderly members place more importance on financial savings, and have lower levels of technology adoption, energy conservation practice use, and knowledge about household energy use. Education levels also matter, with higher levels associated with energy-efficient technology adoption and energy conservation practice use. Similarly, university education increases the stated importance of energy savings for greenhouse gas reductions and decreases the stated importance for financial reasons. Education impacts also vary greatly across survey countries and there is some evidence of an Eastern-Western European divide with respect to attitudes towards energy savings. These cross-country differences highlight the need to balance a common EU energy-efficiency policy framework with flexibility for country specific policies to address unique constraints to energy-efficient technology and conservation practice adoption. (C) 2012 Elsevier Ltd. All rights reserved.

C1 [Mills, Bradford; Schleich, Joachim] Virginia Polytech Inst & State Univ, Blacksburg, VA 24061 USA.

[Schleich, Joachim] Fraunhofer Inst Syst & Innovat Res, D-76139 Karlsruhe, Germany.

[Schleich, Joachim] Grenoble Ecole Management, F-38003 Grenoble 01, France.

RP Mills, B (reprint author), Virginia Polytech Inst & State Univ, 314 Hutcheson Hall, Blacksburg, VA 24061 USA.

EM bfmills@vt.edu

OI Schleich, Joachim/0000-0001-6079-7240

FU German Ministry of Education and Research

FX We are thankful for the helpful comments provided by two anonymous reviewers. We also gratefully acknowledge funding within the project "Social, ecologic and economic dimensions of sustainable energy consumption" (Soziale, ökologische und ökonomische Dimensionen eines nachhaltigen Energiekonsums in Wohngebäuden) under the research program "From words to deeds-new ways of sustainable consumption" (Vom Wissen zum Handeln-neue Wege zum nachhaltigen Konsum) of the German Ministry of Education and Research.

CR Abrahamse W, 2005, J ENVIRON PSYCHOL, V25, P273, DOI 10.1016/j.jenvp.2005.08.002

Ajzen I., 1980, UNDERSTANDING ATTITU

ANDREONI J, 1990, ECON J, V100, P464, DOI 10.2307/2234133

Banerjee A, 2003, ENERG POLICY, V31, P109, DOI 10.1016/S0301-4215(02)00012-5

- Barr S, 2005, ENER POLICY, V33, P1425, DOI 10.1016/j.enpol.2003.12.016
- Bertoldi P., 2009, ELECT CONSUMPTION EF
- Bertoldi P, 1999, P SAVE C EN EFF MILL
- BLACK JS, 1985, J APPL PSYCHOL, V70, P3, DOI 10.1037//0021-9010.70.1.3
- Brand K.-W., 1997, INT HDB ENV SOCIOLOG, P204
- Brechling V, 1994, FISCAL STUDIES, V15, P44, DOI DOI 10.1111/J.1475-5890.1994.TB00196.X
- BREUSCH TS, 1979, ECONOMETRICA, V47, P1287, DOI 10.2307/1911963
- Brohmann B., 2009, 09013 ZEW
- Caird S, 2008, ENER EFFIC, V1, P149, DOI 10.1007/s12053-008-9013-y
- Carlsson F, 2000, APPL ECON, V32, P661, DOI 10.1080/000368400322273
- Carlsson Kanyama, 2005, INT J CONSUM STUD, V29, P239, DOI [10.1111/j.1470-6431.2005.00409.x, DOI 10.1111/J.1470-6431.2005.00409.X]
- CURTIS FA, 1984, ENER POLICY, V12, P452, DOI 10.1016/0301-4215(84)90109-5
- Fonseca P, 2008, RESIDENTIAL MONITORI
- Di Maria C, 2010, SCOT J POLIT ECON, V57, P48, DOI 10.1111/j.1467-9485.2009.00506.x
- DILLMAN DA, 1983, J ECON PSYCHOL, V3, P299, DOI 10.1016/0167-4870(83)90008-9
- Dupont DP, 2004, ECOL ECON, V49, P273, DOI 10.1016/j.ecolecon.2004.01.013
- Ecofys and Fraunhofer Institute for Systems and Innovation Research (Fraunhofer ISI), 2010, EN SAV 2010 TRIPL IM
- Ek K, 2010, ENER POLICY, V38, P1578, DOI 10.1016/j.enpol.2009.11.041
- Eurostat, 2011, LAB MARK STAT EUR PO
- European Commission, 2008, COM2008772 EUR COMM
- European Commission, 2011, SPEC EUR 372 CLIM CH
- European Commission. COM, 2008, COM200813 EUR COMM
- European Commission, 2011, COMM COMM EUR PARL C
- FERGUSON MR, 1993, ENVIRON PLANN A, V25, P609, DOI 10.1068/a250609
- Gardner, 1996, GARDNER ENV PROBLEMS
- Harbaugh WT, 1998, AM ECON REV, V88, P277
- Hirst E., 1982, ENERGY SYSTEMS POLIC, V6, P135
- Hofman R., 2004, I CONTEXTS ED SYSTEM
- Howarth RB, 2000, ENER POLICY, V28, P477
- HOWELL SE, 1992, ENVIRON BEHAV, V24, P134, DOI 10.1177/0013916592241006
- Huber PJ, 1967, P 5 BERK S MATH STAT, V4, P221
- Kammerer D, 2009, ECOL ECON, V68, P2285, DOI 10.1016/j.ecolecon.2009.02.016
- Lane K., 2007, EUR COUNC EN EFF EC, P743
- Linden AL, 2006, ENER POLICY, V34, P1918, DOI 10.1016/j.enpol.2005.01.015
- LONG JE, 1993, ENER ECON, V15, P232, DOI 10.1016/0140-9883(93)90012-G
- LUTZENHISER L, 1992, ENERGY, V17, P47, DOI 10.1016/0360-5442(92)90032-U
- LUTZENHISER L, 1993, ANNU REV ENER ENV, V18, P247, DOI 10.1146/annurev.energy.18.1.247
- Lutzenhiser L., 2002, EXPLORATORY ANAL RES
- Mahapatra K, 2008, ENER POLICY, V36, P577, DOI 10.1016/j.enpol.2007.10.006
- Mills B, 2010, ENER POLICY, V38, P814, DOI 10.1016/j.enpol.2009.10.028
- Mills BF, 2010, RESOUR ENERGY ECON, V32, P363, DOI 10.1016/j.reseneeco.2009.10.002
- Murray AG, 2011, ENER ECON, V33, P1103, DOI 10.1016/j.eneco.2011.04.013
- Nair G, 2010, ENER POLICY, V38, P2956, DOI 10.1016/j.enpol.2010.01.033
- Organization for Economic Co-Operation and Development (OECD), 2011, GREEN HOUS BEH ROL P
- OECD, 2008, HOUS BEH ENV REV EV
- PAINTER J, 1983, J ECON PSYCHOL, V3, P317, DOI 10.1016/0167-4870(83)90009-0
- Poortinga W, 2004, ENVIRON BEHAV, V36, P70, DOI 10.1177/0013916503251466
- Poortinga W, 2003, J ECON PSYCHOL, V24, P49, DOI 10.1016/S0167-4870(02)00154-X
- Reiss PC, 2008, RAND J ECON, V39, P636, DOI 10.1111/j.1756-2171.2008.00032.x
- RITCHIE JRB, 1981, J CONSUM RES, V8, P233, DOI 10.1086/208860
- Sammer K, 2006, BUSINESS STRATEGY EN, V15, P185, DOI DOI 10.1002/BSE.522
- Sanchez MC, 2008, ENER POLICY, V36, P2098, DOI 10.1016/j.enpol.2008.02.021
- Sardianou E, 2007, ENER POLICY, V35, P3778, DOI 10.1016/j.enpol.2007.01.020
- Schiellerup P, 2002, ENER POLICY, V30, P327, DOI 10.1016/S0301-4215(01)00099-4
- SCHIPPER L, 1991, ENER POLICY, V19, P244, DOI 10.1016/0301-4215(91)90150-M
- SCHULTZ TW, 1975, J ECON LIT, V13, P827

Scott S, 1997, ENERG ECON, V19, P187, DOI 10.1016/S0140-9883(96)01000-6  
 Sjoberg L, 2005, INT REV SOCIOL, V15, P327, DOI 10.1080/03906700500159755  
 Stern PC, 2000, J SOC ISSUES, V56, P407, DOI 10.1111/0022-4537.00175  
 Sutherland R. J., 1991, ENERGY J, V12, P15, DOI DOI 10.5547/ISSN0195-6574-EJ-V0L12-N03-3  
 Torgler B., 2008, DIFFERENCES PREFEREN  
 Torgler B, 2007, ECOL ECON, V63, P536, DOI 10.1016/j.ecolecon.2006.12.013  
 [Fraunhofer-Institute for Systems and Innovation Research (Fraunhofer ISI) ENERDATA Institute of  
 Studies for the Integration of Systems ISIS Technical University Vienna Wuppertal Institute for Climate  
 Environment and Energy WIJ, 2009, STYD EN SAV POT EU M  
 Van Raaij F., 1983, J ECON PSYCHOL, V1, P39  
 Viklund M, 2004, ENERG POLICY, V32, P1169  
 WAIDE P, 2001, MONITORING ENERGY EF  
 WAIDE P, 1998, MONITORING ENERGY EF  
 WALSH MJ, 1989, ENERG ECON, V11, P275, DOI 10.1016/0140-9883(89)90043-1  
 Weber C, 2000, ENERG POLICY, V28, P549, DOI 10.1016/S0301-4215(00)00040-9  
 WHITE H, 1980, ECONOMETRICA, V48, P817, DOI 10.2307/1912934  
 WHITEHEAD JC, 1991, GROWTH CHANGE, V22, P10, DOI 10.1111/j.1468-2257.1991.tb00538.x  
 Wilson C, 2007, ANNU REV ENV RESOUR, V32, P169, DOI 10.1146/annurev.energy.32.053006.141137

NR 76

TC 87

Z9 88

U1 3

U2 55

PU ELSEVIER SCI LTD

PI OXFORD

PA THE BOULEVARD, LANGFORD LANE, KIDLINGTON, OXFORD OX5 1GB, OXON, ENGLAND

SN 0301-4215

J9 ENERG POLICY

JI Energy Policy

PD OCT

PY 2012

VL 49

BP 616

EP 628

DI 10.1016/j.enpol.2012.07.008

PG 13

WC Economics; Energy &amp; Fuels; Environmental Sciences; Environmental Studies

SC Business &amp; Economics; Energy &amp; Fuels; Environmental Sciences &amp; Ecology

GA 016CC

UT WOS:000309493900067

DA 2018-05-03

ER

PT J

AU Ek, K

Soderholm, P

AF Ek, Kristina

Soderholm, Patrik

TI The devil is in the details: Household electricity saving behavior and  
the role of information

SO ENERGY POLICY

LA English

DT Article

DE Household behavior; Electricity conservation; Information

ID ECONOMIC MOTIVATION; ENERGY; DECISION; NORMS; CONSERVATION; DIFFUSION;  
PARADOX; SWEDEN; RISKAB The purpose of this paper is to analyze Swedish households' willingness to increase their daily efforts to  
save electricity. The analysis builds on a broad theoretical framework, which embraces both economic and

norm-based motivations in explaining household behavior. The paper pays particular attention to the role of information about the availability of different behavioral changes that can be undertaken at the household level. The empirical results are based on a postal survey that was sent out to 1200 Swedish households, and the econometric analysis is carried out within a so-called ordered probit framework. Our results indicate that costs, environmental attitudes and social interactions are all important determinants of electricity saving activities within Swedish households. We tested the hypothesis that information about available savings measures that is presented in a more concrete and specific way is more likely to affect (stated) behavior than is more general information, and the data collected support this notion. The paper ends by discussing some implications of these results for the design of future informative policy measures in the energy-efficiency field. (C) 2009 Elsevier Ltd. All rights reserved.

C1 [Ek, Kristina; Soderholm, Patrik] Lulea Univ Technol, Econ Unit, S-97187 Lulea, Sweden.

RP Soderholm, P (reprint author), Lulea Univ Technol, Econ Unit, S-97187 Lulea, Sweden.

EM kristina.ek@ltu.se; Patrik.Soderholm@ltu.se

CR Biel A, 2003, INDIVIDUAL STRUCTURA

Biel A, 2007, J ECON PSYCHOL, V28, P93, DOI 10.1016/j.joep.2006.03.003

BLADH M, 2005, 289 TEMA LINK U

Bladh M, 2008, ENER POLICY, V36, P3521, DOI 10.1016/j.enpol.2008.06.001

Brandon G, 1999, J ENVIRON PSYCHOL, V19, P75, DOI 10.1006/jev.1998.0105

DESMEDT J, 2008, J CLEAN PROD, V17, P455

Eagly A. H, 1997, ENV ETHICS BEHAV PSY

Ek K, 2008, ECOL ECON, V68, P169, DOI 10.1016/j.ecolecon.2008.02.013

ELLEGARD K, 2005, 290 TEMAT LINK U

Foss NJ, 2003, J ECON PSYCHOL, V24, P245, DOI 10.1016/S0167-4870(02)00206-4

Furubotn E.G., 1997, I EC THEORY CONTRIBU

Gillingham K, 2009, 0913 RES FUT

Greene W. H., 1997, ECONOMETRIC ANAL

Gyberg P, 2009, ENER POLICY, V37, P2807, DOI 10.1016/j.enpol.2009.03.043

Hage O, 2009, RESOUR CONSERV RECY, V53, P155, DOI 10.1016/j.resconrec.2008.11.003

Hibbert J, 2002, J BEHAV FINANC, V8, P41

International Energy Agency (IEA), 2007, EN BAL OECD COUNTR 2

Jaccard M, 2006, ENVIRON MODEL ASSESS, V11, P91, DOI 10.1007/s10666-005-9036-0

JAFFE AB, 1994, RESOUR ENERGY ECON, V16, P91, DOI 10.1016/0928-7655(94)90001-9

KAHNEMAN D, 1979, ECONOMETRICA, V47, P263, DOI 10.2307/1914185

Linden AL, 2006, ENER POLICY, V34, P1918, DOI 10.1016/j.enpol.2005.01.015

Mahapatra K, 2008, ENER POLICY, V36, P577, DOI 10.1016/j.enpol.2007.10.006

North D. C., 1990, I I CHANGE EC PERFOR

NYBERG L, 2002, THESIS KARLSTAD U SW

Nyborg K, 2006, ENVIRON RESOUR ECON, V35, P1, DOI 10.1007/s10640-006-9001-7

Oxera, 2006, POL EN EFF UK HOUS S

Petersen E., 2007, INT J SUSTAINABILITY, V8, P16, DOI DOI 10.1108/14676370710717562

Samuelson W., 1988, J RISK UNCERTAINTY, V1, P7, DOI DOI 10.1007/BF00055564

SARDIANOU E, 2007, ENER POLICY, V25, P3778

SCHWARTZ SH, 1973, J EXP SOC PSYCHOL, V9, P349, DOI 10.1016/0022-1031(73)90071-1

Schwartz S. H., 1977, ADV EXPT SOCIAL PSYC, V10, P221, DOI [DOI 10.1016/S0065-2601(08)60358-5, 10.1016/S0065-2601(08)60358-5]

SIMON HA, 1959, AM ECON REV, V49, P253

Sorrell Steve, 2004, EC ENERGY EFFICIENCY

SPRANCA M, 1991, J EXP SOC PSYCHOL, V27, P76, DOI 10.1016/0022-1031(91)90011-T

Steg L, 2008, ENER POLICY, V36, P4449, DOI 10.1016/j.enpol.2008.09.027

\*SWED EN AG, 2007, EN 2006

Throne-Holst H, 2008, MANAG ENVIRON QUAL, V19, P54, DOI 10.1108/14777830810840363

Tol R.S.J., 2000, PACIFIC ASIAN J ENER, V10, P1

Vedung E., 1998, CARROTS STICKS SERMO

Viklund M, 2004, ENER POLICY, V32, P1159, DOI 10.1016/S0301-4215(03)00079-X

WILLIAMSON O. E., 1989, HDB IND ORG, VI

NR 41

TC 84

Z9 87

U1 1  
 U2 21  
 PU ELSEVIER SCI LTD  
 PI OXFORD  
 PA THE BOULEVARD, LANGFORD LANE, KIDLINGTON, OXFORD OX5 1GB, OXON, ENGLAND  
 SN 0301-4215  
 J9 ENER POLICY  
 JI Energy Policy  
 PD MAR  
 PY 2010  
 VL 38  
 IS 3  
 BP 1578  
 EP 1587  
 DI 10.1016/j.enpol.2009.11.041  
 PG 10  
 WC Economics; Energy & Fuels; Environmental Sciences; Environmental Studies  
 SC Business & Economics; Energy & Fuels; Environmental Sciences & Ecology  
 GA 555HP  
 UT WOS:000274500000035  
 DA 2018-05-03  
 ER

PT J  
 AU Davis, M  
 AF Davis, M  
 TI Rural household energy consumption - The effects of access to  
 electricity - evidence from South Africa  
 SO ENERGY POLICY  
 LA English  
 DT Article  
 DE rural; household; transition  
 ID FUELWOOD

AB This paper examines household energy consumption patterns in rural areas in the light of energy transition theories. In particular, the study aims to identify the effects of access to electricity on fuel choice. The analysis uses data from an extensive household survey conducted in South Africa and examines the prevalence of different fuels, energy expenditure, the end-uses of fuels, and multiple-fuel use patterns. It is concluded that evidence exists for the presence of an energy transition in rural households, largely driven by income. Access to electricity affects the nature of this transition, and there is weak evidence to suggest that it accelerates the process. (C) 1998 Published by Elsevier Science Ltd. All rights reserved.

C1 Univ Cape Town, Energy & Dev Res Ctr, ZA-7700 Rondebosch, South Africa.

RP Davis, M (reprint author), Univ Cape Town, Energy & Dev Res Ctr, ZA-7700 Rondebosch, South Africa.

CR \*AS PROD ORG, 1995, APPR EN SOURCE RUR A, P2

Barnes D.F., 1988, ELECT POWER RURAL GR

Cecelski E., 1984, RURAL ENERGY CRISIS

CECELSKI E, 1982, ENERGY DEV COUNTRIES

\*ESK, 1995, EL STAT OLD PROV 31

FLUITMAN F, 1983, 126 INT LAB OFF WORL

FOLEY G, 1995, ENERGY SERIES, P17

FOLEY G, 1989, ELECT RURAL PEOPLE

LEACH G, 1992, ENER POLICY, V20, P116, DOI 10.1016/0301-4215(92)90105-B

Leach G., 1987, HOUSEHOLD ENERGY HDB

Leach G., 1987, DISCUSSION PAPER SER

MAILLARD, 1985, RURAL ELECTRIFICATIO

MANDER J, 1995, PFLASS01 U NAT I NAT

Munasinghe M., 1987, RURAL ELECTRIFICATIO

OKEEFE P, 1989, NAT RESOUR FORUM, V13, P2, DOI 10.1111/j.1477-8947.1989.tb00845.x

PEARCE D, 1987, ENER POLICY, V15, P329, DOI 10.1016/0301-4215(87)90023-1

RAMANI KV, 1992, RURAL ELECTRIFICATIO, P19  
 \*SALDRU, 1995, S AFR RICH POOR BAS  
 SCHRAMM G, 1993, OPEC REV WIN  
 SHAMIN J, 1995, ENERGY WATER CRISES  
 SOUSSAN J, 1990, ENER G POLICY, V18, P572, DOI 10.1016/0301-4215(90)90208-L  
 SOUSSAN J, 1987, DISCUSSION PAPER SER, V35  
 THOM C, 1994, 6 U CAP TOWN EN DEV  
 VANDER JF, 1991, OPHTHALMOLOGY, V98, P23  
 VILJOEN R, 1994, RURAL WOOD WOODFUEL  
 VILJOEN R, 1989, THESIS U CAPE TOWN C  
 WARD S, 1995, REV RURAL HOUSEHOLD  
 NR 27  
 TC 81  
 Z9 84  
 U1 4  
 U2 13  
 PU ELSEVIER SCI LTD  
 PI OXFORD  
 PA THE BOULEVARD, LANGFORD LANE, KIDLINGTON, OXFORD OX5 1GB, OXON, ENGLAND  
 SN 0301-4215  
 J9 ENER G POLICY  
 JI Energy Policy  
 PD FEB  
 PY 1998  
 VL 26  
 IS 3  
 BP 207  
 EP 217  
 DI 10.1016/S0301-4215(97)00100-6  
 PG 11  
 WC Economics; Energy & Fuels; Environmental Sciences; Environmental Studies  
 SC Business & Economics; Energy & Fuels; Environmental Sciences & Ecology  
 GA ZF323  
 UT WOS:000072886000005  
 DA 2018-05-03  
 ER  
  
 PT J  
 AU Ekholm, T  
     Krey, V  
     Pachauri, S  
     Riahi, K  
 AF Ekholm, Tommi  
     Krey, Volker  
     Pachauri, Shonali  
     Riahi, Keywan  
 TI Determinants of household energy consumption in India  
 SO ENERGY POLICY  
 LA English  
 DT Article  
 DE Household energy consumption; Energy access; India  
 ID SOCIOECONOMIC IMPACTS; DEVELOPING-COUNTRIES; RURAL-AREAS; FUEL; ACCESS;  
     MODEL; COOKING; SECTOR; POOR  
 AB Improving access to affordable modern energy is critical to improving living standards in the developing world. Rural households in India, in particular, are almost entirely reliant on traditional biomass for their basic cooking energy needs. This has adverse effects on their health and productivity, and also causes environmental degradation. This study presents a new generic modelling approach, with a focus on cooking fuel choices, and explores response strategies for energy poverty eradication in India. The

- modelling approach analyzes the determinants of fuel consumption choices for heterogeneous household groups, incorporating the effect of income distributions and traditionally more intangible factors such as preferences and private discount rates. The methodology is used to develop alternate future scenarios that explore how different policy mechanisms such as fuel subsidies and micro-financing can enhance the diffusion of modern, more efficient, energy sources in India. (C) 2010 Elsevier Ltd. All rights reserved.
- C1 [Ekholm, Tommi] VTT Tech Res Ctr Finland, FIN-02044 Espoo, Finland.  
 [Krey, Volker; Pachauri, Shonali; Riahi, Keywan] Int Inst Appl Syst Anal, A-2361 Laxenburg, Austria.  
 [Ekholm, Tommi] TKK Helsinki Univ Technol, Espoo, Finland.
- RP Ekholm, T (reprint author), VTT Tech Res Ctr Finland, POB 1000, FIN-02044 Espoo, Finland.  
 EM tommi.ekholm@vtt.fi  
 RI Riahi, Keywan/B-6426-2011; Ekholm, Tommi/B-6427-2015  
 OI Riahi, Keywan/0000-0001-7193-3498; Ekholm, Tommi/0000-0002-9124-6289  
 FU TEKES; Finnish Academy of Sciences; Helsinki Institute of Science and Technology Studies (HIST)
- FX The funding from TEKES, a consortium of Finnish companies and the Finnish Academy of Sciences for the IIASA YSSP attendance of Tommi Ekholm is appreciated. Also, funding from Helsinki Institute of Science and Technology Studies (HIST) for extending the work and writing the paper is greatly appreciated.
- CR Asian Development Bank, 2008, RES STUD POV SPEC PU  
 BHAGAVAN MR, 1995, BIOMASS BIOENERG, V8, P181, DOI 10.1016/0961-9534(94)00084-7  
 Bhattacharyya SC, 2006, ENER POLICY, V34, P3387, DOI 10.1016/j.enpol.2005.08.026  
 Cabraal RA, 2005, ANNU REV ENV RESOUR, V30, P117, DOI 10.1146/annurev.energy.30.050504.144228  
 Farsi M, 2007, ENVIRON DEV ECON, V12, P757, DOI 10.1017/S1355770X07003932  
 Frederick S, 2002, J ECON LIT, V40, P351, DOI 10.1257/002205102320161311  
 Gangopadhyay S, 2005, ENER POLICY, V33, P2326, DOI 10.1016/j.enpol.2004.04.024  
 Gangopadhyay S, 2003, ACCESS POOR MODERN H  
 Gundimeda H, 2008, ENER ECON, V30, P517, DOI 10.1016/j.eneco.2006.10.014  
 Howells MI, 2005, ENER POLICY, V33, P1833, DOI 10.1016/j.enpol.2004.02.019  
 \*IMF, 2008, WORLD EC OUTL 2008 D  
 Kanagawa M, 2008, ENER POLICY, V36, P2016, DOI 10.1016/j.enpol.2008.01.041  
 Kanagawa M, 2007, ECOL ECON, V62, P319, DOI 10.1016/j.ecolecon.2006.06.005  
 Kaul M, 2009, FOREST ECOL MANAG, V258, P100, DOI 10.1016/j.foreco.2009.03.049  
 LEACH G, 1992, ENER POLICY, V20, P116, DOI 10.1016/0301-4215(92)90105-B  
 LETSCHERT VE, 2007, LBNL63199  
 Mas-Colell A., 1995, MICROECONOMIC THEORY  
 Masera OR, 2000, WORLD DEV, V28, P2083, DOI 10.1016/S0305-750X(00)00076-0  
 Messner S., 1995, WP9569 INT I APPL SY  
 \*NSSO, 2000, HOUS CONS EXP SURV I  
 Pachauri S, 2004, WORLD DEV, V32, P2083, DOI 10.1016/j.worlddev.2004.08.005  
 Pachauri S, 2004, ENER POLICY, V32, P1723, DOI 10.1016/S0301-4215(03)00162-9  
 Pachauri S., 2007, ENERGY ANAL HOUSEHOL  
 REDDY AKN, 1994, ENERGY, V19, P561, DOI 10.1016/0360-5442(94)90052-3  
 Reddy B. S., 1996, Energy Conversion and Management, V37, P117, DOI 10.1016/0196-8904(95)00016-7  
 REDDY BS, 1995, ENERGY, V20, P929  
 Reddy BS, 2003, ENER POLICY, V31, P1117, DOI 10.1016/S0301-4215(02)00220-3  
 Riahi K, 2007, TECHNOL FORECAST SOC, V74, P887, DOI 10.1016/j.techfore.2006.05.026  
 Robinson M. S, 1996, J INT DEV, V8, P153  
 TERI, 2006, PSA20063 TERI  
 TRAIN K, 1985, ENERGY, V10, P1243, DOI 10.1016/0360-5442(85)90135-5  
 VANRUIJVEN BJ, 2008, THESIS UTRECHT U
- NR 32  
 TC 80  
 Z9 83  
 U1 1  
 U2 20  
 PU ELSEVIER SCI LTD  
 PI OXFORD



PA THE BOULEVARD, LANGFORD LANE, KIDLINGTON, OXFORD OX5 1GB, OXON, ENGLAND  
 SN 0301-4215  
 J9 ENERGPOLICY  
 JI Energy Policy  
 PD OCT  
 PY 2010  
 VL 38  
 IS 10  
 BP 5696  
 EP 5707  
 DI 10.1016/j.enpol.2010.05.017  
 PG 12  
 WC Economics; Energy & Fuels; Environmental Sciences; Environmental Studies  
 SC Business & Economics; Energy & Fuels; Environmental Sciences & Ecology  
 GA 655HO  
 UT WOS:000282240100038  
 DA 2018-05-03  
 ER

PT J  
 AU Zhao, XL  
 Li, N  
 Ma, CB  
 AF Zhao, Xiaoli  
 Li, Na  
 Ma, Chunbo

TI Residential energy consumption in urban China: A decomposition analysis  
 SO ENERGY POLICY

LA English  
 DT Article

DE Residential energy consumption; Index Decomposition Analysis (IDA);  
 China

ID EFFICIENCY STANDARDS; BUILDINGS; INTENSITY; RETROFIT; PROGRESS; SECTOR;  
 IMPACT

AB Residential energy consumption (REC) is the second largest energy use category (10%) in China and urban residents account for 63% of the REC. Understanding the underlying drivers of variations of urban REC thus helps to identify challenges and opportunities and provide advices for future policy measures. This paper applies the LMDI method to a decomposition of China's urban REC during the period of 1998-2007 at disaggregated product/activity level using data collected from a wide range of sources. Our results have shown an extensive structure change towards a more energy-intensive household consumption structure as well as an intensive structure change towards high-quality and cleaner energy such as electricity, oil, and natural gas, which reflects a changing lifestyle and consumption mode in pursuit of a higher level of comfort, convenience and environmental protection. We have also found that China's price reforms in the energy sector have contributed to a reduction of REC while scale factors including increased urban population and income levels have played a key role in the rapid growth of REC. We suggest that further deregulation in energy prices and regulatory as well as voluntary energy efficiency and conservation policies in the residential sector should be promoted. (C) 2011 Elsevier Ltd. All rights reserved.

C1 [Ma, Chunbo] Univ Western Australia, Sch Agr & Resource Econ, Perth, WA 6012, Australia.  
 [Ma, Chunbo] Univ Western Australia, Ctr Environm Econ & Policy, Perth, WA 6012, Australia.  
 [Zhao, Xiaoli; Li, Na] N China Elect Power Univ, Sch Econ & Management, Beijing, Peoples R China.  
 [Zhao, Xiaoli; Li, Na] N China Elect Power Univ, Inst Low Carbon Econ & Trade, Beijing, Peoples R China.  
 RP Ma, CB (reprint author), Univ Western Australia, Sch Agr & Resource Econ, Perth, WA 6012, Australia.  
 EM chunbo.ma@uwa.edu.au  
 RI Ma, Chunbo/D-3478-2011  
 OI Ma, Chunbo/0000-0002-9973-2943  
 FU National Natural Science Foundation of China [70773040, 71073053]  
 FX This study is funded by the National Natural Science Foundation of China

(Project nos. 70773040 and 71073053). The authors want to thank Chao Ouyang for her help in data collection, thank Professor Sufang Zhang's for her help in grammar correction. The authors especially appreciate the anonymous reviewers for their valuable comments.

- CR Achao C, 2009, ENER POLICY, V37, P5208, DOI 10.1016/j.enpol.2009.07.043  
 Ang BW, 2004, ENER POLICY, V32, P1131, DOI 10.1016/S0301-4215(03)00076-4  
 Ang BW, 2000, ENERGY, V25, P1149, DOI 10.1016/S0360-5442(00)00039-6  
 Ang BW, 2001, ENERGY, V26, P537, DOI 10.1016/S0360-5442(01)00022-6  
 Building Energy Research Center (BERC), 2008, ANN DEV REP CHIN BUI  
 Beijing Municipal Commission of Development and Reform (BMCDR), 1998, PRIC SEARCH, P1998  
 Brockett D., 2002, P 2002 AM COUNC EN E  
 Chai J, 2009, ENER POLICY, V37, P5717, DOI 10.1016/j.enpol.2009.08.037  
 Chen SQ, 2008, ENER BUILDINGS, V40, P654, DOI 10.1016/j.enbuild.2007.04.022  
 China Price Information Network (CPIN), 1999, CHIN MARK PRIC MON R, P1999  
 Deng X., 2007, ANN C EC HOB AUSTR  
 Dietzenbacher E., 1998, ECON SYST RES, V10, P307, DOI DOI 10.1080/09535319800000023  
 Energy Foundation China Sustainable Energy Program, 2006, CHIN FUEL EFF BACKGR  
 Feng Y.L., 2008, CHINA STAT, V8, P15  
 Glicicsman Leon R, 2001, ANNU REV ENER ENV, V26, P83  
 Golley J., 2008, CHINAS DILEMMA EC GR, P334  
 Haas R, 1997, ENER POLICY, V25, P789, DOI 10.1016/S0301-4215(97)00069-4  
 He KB, 2002, ANNU REV ENER ENV, V27, P397, DOI 10.1146/annurev.energy.27.122001.083421  
 Hoekstra R, 2003, ENER ECON, V25, P39, DOI 10.1016/S0140-9883(02)00059-2  
 Hoekstra R., 2005, EC GROWTH MAT FLOWS  
 Lang SW, 2004, ENER BUILDINGS, V36, P1191, DOI 10.1016/j.enbuild.2003.09.014  
 Li DY, 2009, ENER POLICY, V37, P2113, DOI 10.1016/j.enpol.2008.11.036  
 Lin J, 2002, ANNU REV ENER ENV, V27, P349, DOI 10.1146/annurev.energy.27.122001.083417  
 Liu H., 2003, J LIGHTING ENG, V14, P45  
 Liu N, 2007, ENER ECON, V29, P609, DOI 10.1016/j.eneco.2006.12.004  
 Liu Y., 2009, POWER DSM, V11, P59  
 Ma C, 2008, ENER POLICY, V36, P1697, DOI 10.1016/j.enpol.2008.01.012  
 McElroy M.B., 1998, ENERGIZING CHINA REC  
 Ministry of Construction of China, 1999, CHIN URB CONSTR YB, P1999  
 Morrissey J, 2011, ENER BUILDINGS, V43, P915, DOI 10.1016/j.enbuild.2010.12.013  
 National Bureau of Statistics of China, 1999, CHIN STAT YB CSY, P1999  
 National Development and Reform Commission (NDRC), 2004, CHIN GREEN LIGHT DEV  
 Ni J., 2008, MOTORIZATION VEHICLE  
 Ouyang JL, 2009, ENER POLICY, V37, P140, DOI 10.1016/j.enpol.2008.07.041  
 Riley K, 2002, POPUL ENVIRON, V23, P479, DOI 10.1023/A:1015138118757  
 Rose A, 1999, HANDBOOK OF ENVIRONMENTAL AND RESOURCE ECONOMICS, P1164  
 SATHAYE J, 1991, ANNU REV ENER ENV, V16, P295  
 Sun JW, 1998, ENER ECON, V20, P85, DOI 10.1016/S0140-9883(97)00012-1  
 Tao J, 2011, APPL ENER, V88, P1890, DOI 10.1016/j.apenergy.2010.11.015  
 Taylor R. P., 2001, CHINA OPPORTUNITIES  
 Wang Z, 2010, ENER POLICY, V38, P5242, DOI 10.1016/j.enpol.2010.05.012  
 Wei YM, 2007, ENER POLICY, V35, P247, DOI 10.1016/j.enpol.2005.11.020  
 Wu W., 2003, EVALUATION EFFECTIVE  
 Yoshino H, 2006, ENER BUILDINGS, V38, P1308, DOI 10.1016/j.enbuild.2006.04.006  
 Yu JH, 2009, APPL ENER, V86, P1970, DOI 10.1016/j.apenergy.2009.01.012  
 Yuan Y., 2000, 100 QUESTIONS VEHICL  
 Zhang F.W., 2005, CHINA ELECT POWER, V09, P15  
 Zhang QY, 2004, ENER BUILDINGS, V36, P1217, DOI 10.1016/j.enbuild.2003.08.002  
 Zhao J, 2009, ENER POLICY, V37, P2106, DOI 10.1016/j.enpol.2008.11.045  
 Zhao X.L., 2010, ENER POLICY, P1379  
 Zhong Y, 2009, ENER POLICY, V37, P2119, DOI 10.1016/j.enpol.2008.11.038  
 Zhou N., 2009, ENERGY 500 MILLION H  
 2003, CHINA ELECT POWER YB

TC 75  
Z9 81  
U1 14  
U2 82  
PU ELSEVIER SCI LTD  
PI OXFORD  
PA THE BOULEVARD, LANGFORD LANE, KIDLINGTON, OXFORD OX5 1GB, OXON, ENGLAND  
SN 0301-4215  
J9 ENERG POLICY  
JI Energy Policy  
PD FEB  
PY 2012  
VL 41  
BP 644  
EP 653  
DI 10.1016/j.enpol.2011.11.027  
PG 10  
WC Economics; Energy & Fuels; Environmental Sciences; Environmental Studies  
SC Business & Economics; Energy & Fuels; Environmental Sciences & Ecology  
GA 903XH  
UT WOS:000301155500062  
DA 2018-05-03  
ER

PT J

AU de Almeida, A

Fonseca, P

Schlomann, B

Feilberg, N

AF de Almeida, Anibal

Fonseca, Paula

Schlomann, Barbara

Feilberg, Nicolai

TI Characterization of the household electricity consumption in the EU,  
potential energy savings and specific policy recommendations

SO ENERGY AND BUILDINGS

LA English

DT Article

DE Energy; Electronic loads; Standby consumption; Savings; Efficiency  
policies; Climate change

AB Although significant improvements in energy efficiency have been achieved in home appliances and lighting, the electricity consumption in the European Union household has increased by 2% per year during the past 10 years. Some reasons are associated with an increased degree of basic comfort and level of amenities and with the widespread utilisation of new types of loads. Wishing to increase the understanding of the energy consumption in the EU households for the different types of equipment including the consumers' behaviour and comfort levels, and to identify demand trends, an energy monitoring campaign, was carried out in 12 geographically representative EU countries, accompanied by a lifestyle survey. From the measurements carried out it was concluded that Information Technologies and entertainment loads are key contributors to the power demand. In basically all types of loads there is wide range of performance levels in the models available in the market. Available technology, associated with responsible consumer behaviour, can reduce wasteful consumption. Based on a bottom up approach the European residential sector potential electricity savings that can be implemented by existing technologies and improved behaviour can reach 48%. The paper presents policy recommendations promoting market transformation and behavioural changes in the equipment selection and operation. (C) 2011 Elsevier B.V. All rights reserved.

C1 [Fonseca, Paula] ISR Univ Coimbra, Dept Elect Engrn, P-3030290 Coimbra, Portugal.

[de Almeida, Anibal] Univ Coimbra, Dept Elect Engrn, P-3030290 Coimbra, Portugal.

[Schlomann, Barbara] Fraunhofer ISI, D-76228 Karlsruhe, Germany.

[Feilberg, Nicolai] SINTEF Energiforskning AS, N-7465 Trondheim, Norway.  
RP Fonseca, P (reprint author), ISR Univ Coimbra, Dept Elect Engr, Polo 2, P-3030290 Coimbra, Portugal.  
EM adealmeida@isr.uc.pt; pfonseca@isr.uc.pt;  
barbara.schlomann@isi.fraunhofer.de; Nicolai.Feilberg@sintef.no  
OI Fonseca, Paula/0000-0002-8272-2300; Almeida, Anibal/0000-0002-3641-5174  
FU European Commission; Executive Agency for Competitiveness and Innovation  
(EACI)  
FX The REMODECE project was mainly supported by the European Commission,  
Executive Agency for Competitiveness and Innovation (EACI).  
CR Bertoldi P., 2009, ELECT CONSUMPTION EF  
BOARDMAN B, 2007, HOME TRUTHS LOW CAR  
\*CECED, 2008, 0608 CECE PP  
Child R, 2008, ENERG EFFIC, V1, P283, DOI 10.1007/s12053-008-9025-7  
\*EUROWHITECERT, 2007, PUBL RES OR REP  
Firth S, 2008, ENERG BUILDINGS, V40, P926, DOI 10.1016/j.enbuild.2007.07.005  
Fischer C, 2008, ENERG EFFIC, V1, P79, DOI 10.1007/s12053-008-9009-7  
Fraunhofer ISI, 2009, STUD EN SAV POT EU M  
\*FRAUNH IZM FRAUN, 2009, ABSCH EN WEIT ENTW I  
\*IEA, 2009, COOL APPL POL STRAT  
\*IEC, 2005, IEC62301  
O Gallachoir BP, 2007, ENERG BUILDINGS, V39, P913, DOI 10.1016/j.enbuild.2006.11.005  
\*ODYSSEE, 2009, EN EFF IND DAT IND  
SCHLOMANN B, 2005, 5303 FRAUNH ISI  
WAIDE P, 2008, ENERGY EFFICIENCY, V1, P279  
2007, EUP LOT 6 REPORT TEN  
2008, REMODECE RESIDENTIAL  
NR 17  
TC 73  
Z9 73  
U1 4  
U2 39  
PU ELSEVIER SCIENCE SA  
PI LAUSANNE  
PA PO BOX 564, 1001 LAUSANNE, SWITZERLAND  
SN 0378-7788  
EI 1872-6178  
J9 ENERG BUILDINGS  
JI Energy Build.  
PD AUG  
PY 2011  
VL 43  
IS 8  
BP 1884  
EP 1894  
DI 10.1016/j.enbuild.2011.03.027  
PG 11  
WC Construction & Building Technology; Energy & Fuels; Engineering, Civil  
SC Construction & Building Technology; Energy & Fuels; Engineering  
GA 792YO  
UT WOS:000292786500010  
DA 2018-05-03  
ER  
  
PT J  
AU Chen, L  
Heerink, N  
van den Berg, M  
AF Chen, L

Heerink, N  
van den Berg, M

TI Energy consumption in rural China: A household model for three villages  
in Jiangxi Province

SO ECOLOGICAL ECONOMICS

LA English

DT Article

DE China; fuelwood; coal; households; energy sources

ID INDIA; CHOICE; IMPACT

AB In China, fuelwood and coal are the most important energy sources for rural households in poor areas.

Along with population and economic growth, excessive fuelwood collection is a major cause of deforestation. Burning coal contributes to environmental problems such as air pollution, acid rain and greenhouse gas emissions. The purpose of this article is to analyze factors determining choice of energy source and labor input into fuelwood collection in poor, forest-rich regions, and to provide policy recommendations on ways to affect these choices. To this end, a nonseparable household model, reflecting choices in labor allocation and energy demand of rural households, is estimated from available data for three villages in a poor, forest-rich region in Jiangxi Province, Southeast China. Innovative aspects of this article are the analyses of factors driving household substitution between forest and non-forest fuels and of dissimilarities in household responses under different market access conditions. (c) 2005 Elsevier B.V. All rights reserved.

C1 Wageningen Univ, Dept Social Sci, NL-6706 KN Wageningen, Netherlands.

IFPRI, Beijing Off, Beijing, Peoples R China.

RP Chen, L (reprint author), Wageningen Univ, Dept Social Sci, Hollandseweg 1, NL-6706 KN Wageningen, Netherlands.

EM Le.Chen@wur.nl

OI Heerink, Nico/0000-0002-9911-3501

CR Amacher GS, 1996, WORLD DEV, V24, P1725, DOI 10.1016/0305-750X(96)00073-3

Angelsen A, 1999, J DEV ECON, V58, P185, DOI 10.1016/S0304-3878(98)00108-4

Boy E, 2000, ENERGY SUSTAIN DEV, V4, P23, DOI DOI 10.1016/S0973-0826(08)60239-2

Bruce N, 2000, B WORLD HEALTH ORGAN, V78, P1078

\*COSWC, 1997, WORK REP WAT SOIL CO

CUI S, 1999, BIOMASS ENERGY RURAL

Heltberg R, 2000, LAND ECON, V76, P213, DOI 10.2307/3147225

Heltberg R, 2005, ENVIRON DEV ECON, V10, P337, DOI 10.1017/S1355770X04001858

Hulscher WS, 1998, IMPROVED COOK STOVE

Hyde WF, 2000, SILVA FENN, V34, P285, DOI 10.14214/sf.632

Kishore VVN, 2002, ENERGY, V27, P47, DOI 10.1016/S0360-5442(01)00056-1

KUIPER M, 2001, REPORT VILLAGE SELEC

RAMAKRISHNA J, 1989, ENVIRON INT, V15, P341, DOI 10.1016/0160-4120(89)90047-0

\*RWEDP, 1997, 28 RWEDP FAO

Singh I., 1986, AGR HOUSEHOLD MODELS

WNG Q, 1988, ZHONGGUO NENGYUAN

WU X, 1986, NONGCUN NENGYUAN

YANG S, 1992, NONGCUN FAZHAN NENGY

YAO X, 1998, WOOD ENERGY CHINA, V13

YUAN Z, 2001, REG SEM COMM BIOM TE

NR 20

TC 73

Z9 82

U1 0

U2 36

PU ELSEVIER SCIENCE BV

PI AMSTERDAM

PA PO BOX 211, 1000 AE AMSTERDAM, NETHERLANDS

SN 0921-8009

J9 ECOL ECON

JI Ecol. Econ.

PD JUN 15

PY 2006

VL 58

IS 2

BP 407

EP 420

DI 10.1016/j.ecolecon.2005.07.018

PG 14

WC Ecology; Economics; Environmental Sciences; Environmental Studies

SC Environmental Sciences & Ecology; Business & Economics

GA 058NM

UT WOS:000238671700013

DA 2018-05-03

ER

PT J

AU Ryghaug, M

Sorensen, KH

AF Ryghaug, Marianne

Sorensen, Knut H.

TI How energy efficiency fails in the building industry

SO ENERGY POLICY

LA English

DT Article

DE Energy efficiency; Building industry; Energy policy

ID TECHNOLOGY; CONSTRUCTION

AB This paper examines how energy efficiency fails in the building industry based on many years of research into the integration of energy efficiency in the construction of buildings and sustainable architecture in Norway. It argues that energy-efficient construction has been seriously restrained by three interrelated problems: (1) deficiencies in public policy to stimulate energy efficiency, (2) limited governmental efforts to regulate the building industry, and (3) a conservative building industry. The paper concludes that innovation and implementation of new, energy-efficient technologies in the building industry requires new policies, better regulations and reformed practices in the industry itself. (C) 2008 Elsevier Ltd. All rights reserved.

C1 [Ryghaug, Marianne; Sorensen, Knut H.] Norwegian Univ Sci & Technol NTNU, Dept Interdisciplinary Studies Culture, N-7491 Trondheim, Norway.

RP Ryghaug, M (reprint author), Norwegian Univ Sci & Technol NTNU, Dept Interdisciplinary Studies Culture, N-7491 Trondheim, Norway.

EM Marianne.Ryghaug@hf.ntnu.no; Knut.Sorensen@hf.ntnu.no

RI Sorensen, Knut/A-4070-2013

OI Sorensen, Knut/0000-0003-0829-3496

FU Research Council of Norway

FX This paper is the result of a number of research projects funded by the Research Council of Norway. It has been dependent on the efforts of many people, and we are particularly grateful to Margrethe Aune, Robert Bye, Thomas Berker, Marit Hubak and Helene Tronstad Moe. Dolores Jorgensen has considerably improved the article by correcting our English and by providing critical comments, and we are much indebted to her. We also appreciate valuable input from our colleagues from engineering and architecture in the Smartbuild project. Finally, we want to thank the two anonymous reviewers for very valuable suggestions to improve the paper.

CR Andresen I, 2007, SMARTE ENERGIEFFEKTI

AUNE M, 2007, SMARTE ENERGIEFFEKTI, P21

Aune M, 2007, ENERG POLICY, V35, P5457, DOI 10.1016/j.enpol.2007.05.007

BYE R, 2008, THESIS NORWEGIAN U V

Geller H, 2006, ENERG POLICY, V34, P556, DOI 10.1016/j.enpol.2005.11.010

Guy S, 2001, J ARCHIT EDUC, V54, P140, DOI 10.1162/10464880152632451

Guy S., 2000, SOCIOLOGY ENERGY BUI

Harty C, 2005, BUILD RES INF, V33, P512, DOI 10.1080/09613210500288605  
 HUBAK M, 1998, 39 STS NORW U SCI TE  
 Latour B., 2005, REASSEMBLING SOCIAL  
 Latour B., 1987, SCI ACTION  
 Lovell H, 2005, HOUSING STUD, V20, P815, DOI 10.1080/02673030500214118  
 Manseau A., 2001, INNOVATION CONSTRUCT  
 MOE HT, 2006, 78 STS NORW U SCI TE  
 OECD, 2003, ENV SUST BUILD CHALL  
 Ryghaug M, 2007, MELLOM KLIMA KOMFORT, P217  
 RYGHAUG M, 2003, 62 STS NORW U SCI TE  
 RYGHAUG M, 2005, SUSTAINABLE ARCHITEC, P145  
 Slaughter ES, 2001, BUILD RES INF, V29, P208, DOI 10.1080/09613210010027693  
 Sorensen KH, 2005, DOMESTICATION MEDIA, P40  
 Sorensen KH, 2007, MELLOM KLIMA KOMFORT, P29  
 van Bueren E, 2007, BUILD RES INF, V35, P543, DOI 10.1080/09613210701203874  
 van Bueren EM, 2002, ENVIRON PLANN B, V29, P75, DOI 10.1068/b2785  
 NR 23  
 TC 68  
 Z9 68  
 U1 0  
 U2 20  
 PU ELSEVIER SCI LTD  
 PI OXFORD  
 PA THE BOULEVARD, LANGFORD LANE, KIDLINGTON, OXFORD OX5 1GB, OXON, ENGLAND  
 SN 0301-4215  
 J9 ENERG POLICY  
 JI Energy Policy  
 PD MAR  
 PY 2009  
 VL 37  
 IS 3  
 BP 984  
 EP 991  
 DI 10.1016/j.enpol.2008.11.001  
 PG 8  
 WC Economics; Energy & Fuels; Environmental Sciences; Environmental Studies  
 SC Business & Economics; Energy & Fuels; Environmental Sciences & Ecology  
 GA 415OF  
 UT WOS:000263942700022  
 DA 2018-05-03  
 ER  
  
 PT J  
 AU Martani, C  
   Lee, D  
   Robinson, P  
   Britter, R  
   Ratti, C  
 AF Martani, Claudio  
   Lee, David  
   Robinson, Prudence  
   Britter, Rex  
   Ratti, Carlo  
 TI ENERNET: Studying the dynamic relationship between building occupancy  
   and energy consumption  
 SO ENERGY AND BUILDINGS  
 LA English  
 DT Article

DE Energy; Consumption; Efficiency; WiFi; Monitoring  
ID TEMPERATURE

AB With cities accounting for approximately two thirds of the global demand for energy, there is significant scope to optimize energy usage of cities, in particular by improving the use of the built form. Large non-domestic buildings are increasingly the focus of attention, due to their substantial demands and associated environmental impacts such as CO2 emissions. Various approaches have been adopted to address building energy efficiency, with more recent studies relating consumption patterns to human occupancy. This paper proposes a new method to measure activity, using WiFi connections as a proxy for human occupancy. Data on the number of WiFi connections and energy consumption (electricity, steam and chilled water) were compared for two buildings within the Massachusetts Institute of Technology's campus. The results of the study demonstrate: the operation of the heating, ventilation and air conditioning (HVAC) systems adhered more closely to factors other than occupancy i.e. external temperature, whilst a small part of the electricity levels did correlate with the occupancy. In order to present possible solutions to address the disconnect between the HVAC system and occupancy levels, this paper identifies future steps that could begin to improve energy usage. (C) 2011 Elsevier B.V. All rights reserved.

C1 [Martani, Claudio; Lee, David; Robinson, Prudence; Britter, Rex; Ratti, Carlo] MIT, Senseable City Lab, Cambridge, MA 02139 USA.

RP Martani, C (reprint author), MIT, Senseable City Lab, Cambridge, MA 02139 USA.

EM martani@mit.edu

RI Lee, David/N-8988-2017

OI Lee, David/0000-0003-0447-8573

FU MITEI at MIT; National Science Foundation; ATT Foundation; MIT SMART;

GE; Audi Volkswagen; BBVA; SNCF; ENEL; MIT Senseable City Lab Consortium

FX Technical advice by Cinzia Talamo and Giancarlo Paganin from the

Politecnico di Milano is gratefully acknowledged. The authors also thank

the MITEI program at MIT, the National Science Foundation, the AT&T

Foundation, the MIT SMART program, GE, Audi Volkswagen, BBVA, SNCF, ENEL

and the members of the MIT Senseable City Lab Consortium for supporting

the research.

CR ACEEE (American Council for an Energy-Efficient Economy), 2008, 2008 ACEEE SUMM STUD

Agarwal Y.B., 2010, OCCUPANCY DRIVEN ENE

Garg V, 2000, ENER BUILDINGS, V32, P81, DOI 10.1016/S0378-7788(99)00040-7

Lindberg R, 2004, ENER BUILDINGS, V36, P495, DOI 10.1016/j.enbuild.2003.12.009

Lo LJ, 2010, ENER BUILDINGS, V42, P1120, DOI 10.1016/j.enbuild.2010.02.003

MIT, MIT EN IN

MIT Department of Facilities, 2009, LEED GOLD CERT NW35

Perez-Lombard L, 2008, ENER BUILDINGS, V40, P394, DOI 10.1016/j.enbuild.2007.03.007

PETTERSEN TD, 1994, ENER BUILDINGS, V21, P209, DOI 10.1016/0378-7788(94)90036-1

Rea M.S., 1987, LIGHTING RES TECHNOL, V19, P81

Sevtsuk A., 2005, 9 INT C COMP URB PLA

Sevtsuk A., 2009, HDB RES URBAN INFORM

Simpson W., 2003, ENERGY SUSTAINABILIT

Stetiu C, 1999, ENER BUILDINGS, V30, P127, DOI 10.1016/S0378-7788(98)00080-2

TIAX LLC, 2005, EN IMP COMM BUILD CO

U.S. Energy Information Administration (EIA), 2006, REN EN CONS EL PREL

Vrecko D, 2009, ENER BUILDINGS, V41, P182, DOI 10.1016/j.enbuild.2008.08.007

Zhu Y., 2000, 12 S IMPR BUILD SYST

NR 18

TC 67

Z9 67

U1 4

U2 17

PU ELSEVIER SCIENCE SA

PI LAUSANNE

PA PO BOX 564, 1001 LAUSANNE, SWITZERLAND

SN 0378-7788

J9 ENER BUILDINGS

J1 Energy Build.



PD APR  
PY 2012  
VL 47  
BP 584  
EP 591  
DI 10.1016/j.enbuild.2011.12.037  
PG 8  
WC Construction & Building Technology; Energy & Fuels; Engineering, Civil  
SC Construction & Building Technology; Energy & Fuels; Engineering  
GA 914YN  
UT WOS:000301989800065  
DA 2018-05-03  
ER

PT J  
AU Mavrotas, G  
    Diakoulaki, D  
    Florios, K  
    Georgiou, P  
AF Mavrotas, George  
    Diakoulaki, Danae  
    Florios, Kostas  
    Georgiou, Paraskevas  
TI A mathematical programming framework for energy planning in services'  
    sector buildings under uncertainty in load demand: The case of a  
    hospital in Athens

SO ENERGY POLICY

LA English

DT Article

DE multi-objective programming; energy planning; minimax regret

ID INTERVAL OBJECTIVE FUNCTION; UTILITY SYSTEMS; MODELS; OPTIMIZATION;  
REGRET; ENVIRONMENT; STRATEGIES; COSTS

AB The aim of this paper is to provide an integrated modeling and optimization framework for energy planning in large consumers of the services' sector based on mathematical programming. The power demand is vaguely known and the underlying uncertainty is modeled using elements from fuzzy set theory. The defined fuzzy programming model is subsequently transformed to an equivalent multi-objective problem, where the minimization of cost and the maximization of demand satisfaction are the objective functions. The Pareto optimal solutions of this problem are obtained using a novel version of the e-constraint method and represent the possibly optimal solutions of the original problem under uncertainty. In the present case, in order to select the most preferred Pareto optimal solution, the minimax regret criterion is properly used to indicate the preferred configuration of the system (i.e. the size of the installed units) given the load uncertainty. Furthermore, the paper proposes a model reduction technique that can be used in similar cases and further examines its effect in the final results. The above methodology is applied to the energy rehabilitation of a hospital in the Athens area. The technologies under consideration include a combined heat and power unit for providing power and heat, an absorption unit and/or a compression unit for providing cooling load. The obtained results demonstrate that, increasing the degree of demand satisfaction, the total annual cost increases almost linearly. Although data compression allows obtaining realistic results, the size of the proposed units might be slightly changed. (C) 2008 Elsevier Ltd. All rights reserved.

C1 [Mavrotas, George; Diakoulaki, Danae; Florios, Kostas; Georgiou, Paraskevas] Natl Tech Univ Athens, Sch Chem Engr, Lab Ind & Energy Econ, Athens 15780, Greece.

RP Mavrotas, G (reprint author), Natl Tech Univ Athens, Sch Chem Engr, Lab Ind & Energy Econ, Zografou Campus, Athens 15780, Greece.

EM mavrotas@chemeng.ntua.gr

OI Florios, Kostas/0000-0002-8210-1125; Georgiou,  
Paraskevas/0000-0003-3673-4615

CR Antunes CH, 2004, ENERGY, V29, P613, DOI 10.1016/j.energy.2003.10.012

Antunes CH, 2003, ANN OPER RES, V120, P15, DOI 10.1023/A:1023337009639

- BROOKE A, 1998, GAMS USERS GUIDE GAM  
 Burer M, 2003, ENERGY, V28, P497, DOI 10.1016/S0360-5442(02)00161-5  
 Chang CT, 1996, CHEM ENG SCI, V51, P3951, DOI 10.1016/0009-2509(96)00232-1  
 CLIMACO J, 1995, INT J ENERG RES, V19, P419, DOI 10.1002/er.4440190507  
 Cohon JL, 1978, MULTIOBJECTIVE PROGR  
 DELGADO M, 1990, FUZZY SET SYST, V37, P33, DOI 10.1016/0165-0114(90)90061-A  
 Diakoulaki D, 2005, INT SER OPER RES MAN, V78, P859, DOI 10.1007/0-387-23081-5\_21  
 Ehr Gott M, 2005, INT SER OPER RES MAN, V78, P667, DOI 10.1007/0-387-23081-5\_17  
 \*EUR COMM, 2001, SAVE 2 PROJ ASS CHP  
 GROSCURTH HM, 1995, ENERG SOURCE, V17, P161, DOI 10.1080/00908319508946076  
 Hobbs B. F., 2000, ENERGY DECISIONS ENV  
 Hwang C. L., 1979, LECT NOTES EC MATH S, V164  
 INUIGUCHI M, 1995, EUR J OPER RES, V86, P526, DOI 10.1016/0377-2217(94)00092-Q  
 Iyer RR, 1998, COMPUT CHEM ENG, V22, P979, DOI 10.1016/S0098-1354(97)00270-6  
 KAVRAKOGLU I, 1983, EUR J OPER RES, V12, P159, DOI 10.1016/0377-2217(83)90219-9  
 KAVRAKOGLU I, 1980, AUTOMATICA, V16, P379, DOI 10.1016/0005-1098(80)90022-9  
 KAVRAKOGLU I, 1987, EUR J OPER RES, V28, P121, DOI 10.1016/0377-2217(87)90211-6  
 KAZAKCI AO, 2006, J OPERATIONS RES SOC  
 LAI YJ, 1992, FUZZY SET SYST, V49, P121, DOI 10.1016/0165-0114(92)90318-X  
 Lai Y.J., 1994, FUZZY MULTIPLE OBJEC  
 Linares P, 2000, J OPER RES SOC, V51, P736, DOI 10.1057/palgrave.jors.2600944  
 Liu ML, 1997, EUR J OPER RES, V100, P142, DOI 10.1016/S0377-2217(96)00025-2  
 Loulou R, 1999, OPER RES LETT, V25, P219, DOI 10.1016/S0167-6377(99)00049-8  
 Martins A. G., 1996, International Transactions in Operational Research, V3, P305, DOI 10.1016/S0969-6016(96)00024-X  
 Mausser HE, 1999, J OPER RES SOC, V50, P1063, DOI 10.1057/palgrave.jors.2600789  
 Mavrotas G, 2003, ENERG CONVERS MANAGE, V44, P1303, DOI 10.1016/S0196-8904(02)00119-X  
 Mavrotas G., 1999, International Transactions in Operational Research, V6, P231  
 MAVROTAS G, 2000, RECENT DEV APPL DECI, P263  
 MEIER P, 1983, EUR J OPER RES, V13, P41, DOI 10.1016/0377-2217(83)90006-1  
 Miettinen K., 1998, NONLINEAR MULTIOBJEC  
 Murtagh B A, 1981, ADV LINEAR PROGRAMMI  
 Oliveira C, 2004, EUR J OPER RES, V153, P370, DOI 10.1016/S0377-2217(03)00159-0  
 RATHNAGEL S, 1981, EUR J OPER RES, V8, P99, DOI 10.1016/0377-2217(81)90249-6  
 Rommelfanger H, 1996, EUR J OPER RES, V92, P512, DOI 10.1016/0377-2217(95)00008-9  
 Savage L. J., 1954, FDN STAT  
 SCHULZ V, 1984, EUR J OPER RES, V17, P302, DOI 10.1016/0377-2217(84)90124-3  
 Steuer R., 1989, MULTIPLE CRITERIA OP  
 Zimmermann H.-J., 1978, Fuzzy Sets and Systems, V1, P45, DOI 10.1016/0165-0114(78)90031-3  
 ZIMMERMANN HJ, 1976, INT J GEN SYST, V2, P209, DOI 10.1080/03081077608547470
- NR 41  
 TC 65  
 Z9 66  
 U1 1  
 U2 16  
 PU ELSEVIER SCI LTD  
 PI OXFORD  
 PA THE BOULEVARD, LANGFORD LANE, KIDLINGTON, OXFORD OX5 1GB, OXON, ENGLAND  
 SN 0301-4215  
 J9 ENERG POLICY  
 JI Energy Policy  
 PD JUL  
 PY 2008  
 VL 36  
 IS 7  
 BP 2415  
 EP 2429  
 DI 10.1016/j.enpol.2008.01.011

PG 15

WC Economics; Energy & Fuels; Environmental Sciences; Environmental Studies

SC Business & Economics; Energy & Fuels; Environmental Sciences & Ecology

GA 327JR

UT WOS:000257725900010

DA 2018-05-03

ER

PT J

AU Daioglou, V

van Ruijven, BJ

van Vuuren, DP

AF Daioglou, Vassilis

van Ruijven, Bas J.

van Vuuren, Detlef P.

TI Model projections for household energy use in developing countries

SO ENERGY

LA English

DT Article

DE Household energy consumption; Energy modeling; Developing countries;

Climate policy

ID INDIAN HOUSEHOLDS; CLIMATE-CHANGE; SECTOR; POLICY; STRATEGIES;

EFFICIENCY; DEMAND; COSTS

AB The residential sector plays an important role in the energy system of developing countries. In this paper we introduce a bottom up simulation model for household energy use. The model describes energy demand for several end-use functions based on a set of physical drivers, such as floor space and heating degree days. The model also recognizes different population groups: i.e. urban and rural households, each distinguishing five income quintiles. The model is applied to analyze possible future developments of residential energy use in five developing world regions: India, China, South East Asia, South Africa and Brazil. We find that in each of these regions cooking is currently the main end-use function, but that other functions, such as space heating, cooling and appliances become more important. At the same time, energy consumption slowly shifts towards modern fuels. The model also shows that climate policy can reduce residential energy emissions, but could also slow down the energy transition away from traditional fuels in low income classes. (C) 2011 Elsevier Ltd. All rights reserved.

C1 [Daioglou, Vassilis] Univ Utrecht, Copernicus Inst Sustainable Dev & Innovat, Dept Sci Technol & Soc, NL-3584 CD Utrecht, Netherlands.

[van Ruijven, Bas J.; van Vuuren, Detlef P.] Netherlands Environm Assessment Agcy PBL, NL-3720 BA Bilthoven, Netherlands.

[van Vuuren, Detlef P.] Univ Utrecht, Utrecht Sustainabil Inst, NL-3584 CS Utrecht, Netherlands.

[van Ruijven, Bas J.] Natl Ctr Atmospher Res, Boulder, CO 80307 USA.

RP Daioglou, V (reprint author), Univ Utrecht, Copernicus Inst Sustainable Dev & Innovat, Dept Sci Technol & Soc, Budapestlaan 6, NL-3584 CD Utrecht, Netherlands.

EM v.daioglou@uu.nl; vruijven@ucar.edu; detlef.vanvuuren@pbl.nl

RI Daioglou, Vassilis/L-7262-2013; van Vuuren, Detlef/A-4764-2009; van Ruijven, Bas/G-8106-2011

OI Daioglou, Vassilis/0000-0002-6028-352X; van Vuuren,

Detlef/0000-0003-0398-2831; van Ruijven, Bas/0000-0003-1232-5892

CR Rosas-Flores JA, 2010, ENERGY, V35, P2596, DOI 10.1016/j.energy.2010.01.015

Amana, 2010, REFR WASH MACH RANG

Anozie AN, 2007, ENERGY, V32, P1283, DOI 10.1016/j.energy.2006.07.004

Bogdan A, 2008, ENERGBUILDINGS, V40, P112

Cardoso RB, 2010, APPL ENERGB, V87, P28, DOI 10.1016/j.apenergy.2009.05.025

CEC, 2009, HIST APPL DAT

Consumentenbond, 1964, CONS MANDBL NED CONS

Daioglou V., 2010, RESIDENTIAL ENERGY U

Dale L, 2002, RETROSPECTIVE EVALUA

de Vries HJM, 2001, IMAGE ENERGY REGIONA

Dixons, 2010, REFR WASH MACH RANG

- DoECC, 2009, EN CONS UK DOM DAT T  
EES, 2006, GREEN WHIT REP EN EF  
EIA, 2005, RES EN CONS SURV DET  
Ekholm T, 2010, ENER POLICY, V38, P5696, DOI 10.1016/j.enpol.2010.05.017  
Farsi M, 2007, ENVIRON DEV ECON, V12, P757, DOI 10.1017/S1355770X07003932  
FSO, 2010, EC US ENV RES  
Gangopadhyay S, 2005, ENER POLICY, V33, P2326, DOI 10.1016/j.enpol.2004.04.024  
HOSIER RH, 1987, RESOUR ENER, V9, P347, DOI 10.1016/0165-0572(87)90003-X  
Howells MI, 2005, ENER POLICY, V33, P1833, DOI 10.1016/j.enpol.2004.02.019  
IEA, 2007, EN BAL  
IEA, 2010, EN TECHN PERSP SCEN  
IEA, EN TECHN PERSP SCEN  
IEA, 2006, WORLD EN OUTL 2006  
IEA, 2004, 30 YEARS EN US IEA C  
HASA, 2009, GEA SCEN DAT INT I A  
IIASA, 2010, GEA SCEN EN TRANS PA  
Isaac M, 2009, ENER POLICY, V37, P507, DOI 10.1016/j.enpol.2008.09.051  
Jannuzzi GM, 2004, ENERGY SUSTAINABLE D, V8  
Kyle P, 2010, ENER J, V31, P145  
Laitner J. A. S., 2004, International Journal of Energy Technology and Policy, V2, P142, DOI 10.1504/IJETP.2004.004592  
LBNL, 2008, CHIN EN DAT  
Lefevre T, 1997, ROLE WOOD ENERGY ASI  
Lucky RA, 2001, ENERGY, V26, P221  
Maconachie R, 2009, LAND USE POLICY, V26, P1090, DOI 10.1016/j.landusepol.2009.01.008  
Masera OR, 2000, WORLD DEV, V28, P2083, DOI 10.1016/S0305-750X(00)00076-0  
McNeil M. A., 2008, GLOBAL POTENTIAL ENE  
McNeil MA, 2007, ECEE 2007 SUMMER STU  
Mills E, 2005, SCIENCE, V308, P1263, DOI 10.1126/science.1113090  
NBSC (National Bureau of Statistics of China), CHIN STAT YB VAR ISS  
Nemet GF, 2010, ENVIRON RES LETT, V5, P10  
NIS, 2007, HOUS COND MIN PLANN  
NRCan, 1990, COMPR EN US DAT 1990  
NSSO, 1997, EN US IND HOUS 5 QUI  
NSSO, 2004, HOUS CONS EXP IND NS  
Oosterhuis F., 2007, COST DECREASES ENV T, VR-07  
Pachauri S, 2004, WORLD DEV, V32, P2083, DOI 10.1016/j.worlddev.2004.08.005  
Pandey R, 2002, ENER POLICY, V30, P97, DOI 10.1016/S0301-4215(01)00062-3  
Peng WY, 2010, ENERGY SUSTAIN DEV, V14, P238, DOI 10.1016/j.esd.2010.07.001  
Reddy S, 2006, ENERGY SUSTAIN DEV, V10, P59  
Reddy S, 1996, INT J ENER RES, V20, P187  
Rong F., 2007, CLIMATE CHANGE LONG  
Saidur R, 2007, ENER POLICY, V35, P1648, DOI 10.1016/j.enpol.2006.05.006  
Sailor DJ, 2003, ENERGY, V28, P941, DOI 10.1016/S0360-5442(03)00033-1  
Schiellerup P., 2001, EXAMINATION EU MINIM  
Schipper LJ, 1996, MITIGATION ADAPTATIO, V1, P167  
SHUKLA PR, 1995, ENER POLICY, V23, P677, DOI 10.1016/0301-4215(95)00062-N  
SSA, 2007, GEN HOUS SURV  
SSA, 2002, GEN HOUS SURV  
Tonooka Y, 2006, ENER BUILDINGS, V38, P1335, DOI 10.1016/j.enbuild.2006.04.011  
TRAIN K, 1985, ENERGY, V10, P1243, DOI 10.1016/0360-5442(85)90135-5  
TYLER S, 1990, ENERGY, V15, P841, DOI 10.1016/0360-5442(90)90067-C  
Utlu Z, 2005, BUILD ENVIRON, V40, P641, DOI 10.1016/j.buildenv.2004.08.006  
van Ruijven B, 2010, ENERGY, V35, P269, DOI 10.1016/j.energy.2009.09.019  
Van Ruijven B, 2008, WORLD DEV, V36, P2801, DOI 10.1016/j.worlddev.2008.01.011  
van Ruijven BJ, 2011, ENER POLICY, V39, P7747, DOI 10.1016/j.enpol.2011.09.021  
van Vuuren DP, 2007, CLIMATIC CHANGE, V81, P119, DOI 10.1007/s10584-006-9172-9  
van Ruijven BJ, ENERGY IN PRESS

Van Vuuren D.P., 2006, INTEGRATED MODELLING  
 Visser P, 2005, ENERGY SUSTAIN DEV, V9, P16  
 WDI, 2009, WORLD DEV IND 2009 D  
 Weiss M, 2008, LEARNING ENERGY EFFI  
 Whirlpool, 2010, REFR WASH MACH RANG  
 World Health Organization, 2010, WHO HOUS EN DAT  
 World-Bank, 2010, POVCALNET ONL TOOL P  
 World-Bank, 2009, GLOB INC DISTR DYN D  
 Xiaohua Wang, 2002, Biomass and Bioenergy, V22, P251, DOI 10.1016/S0961-9534(02)00013-2

NR 77

TC 63

Z9 63

U1 0

U2 28

PU PERGAMON-ELSEVIER SCIENCE LTD

PI OXFORD

PA THE BOULEVARD, LANGFORD LANE, KIDLINGTON, OXFORD OX5 1GB, ENGLAND

SN 0360-5442

J9 ENERGY

JI Energy

PD JAN

PY 2012

VL 37

IS 1

BP 601

EP 615

DI 10.1016/j.energy.2011.10.044

PG 15

WC Thermodynamics; Energy &amp; Fuels

SC Thermodynamics; Energy &amp; Fuels

GA 894ZK

UT WOS:000300465800059

DA 2018-05-03

ER

PT J

AU Doukas, H

Nychtis, C

Psarras, J

AF Doukas, Haris

Nychtis, Christos

Psarras, John

TI Assessing energy-saving measures in buildings through an intelligent decision support model

SO BUILDING AND ENVIRONMENT

LA English

DT Article

DE Intelligent models; Building energy Management systems; Energy efficiency

ID MANAGEMENT; SIMULATION; SYSTEM

AB Indeed, in the recent years, important efforts in applying energy management processes have been focused on the building sector, which demonstrates the increasing energy intensity and energy consumption indexes. The role of the building energy management systems (BEMS) is known and significant in this respect, for the management of the daily energy operations of a typical building. Effective energy management however requires the use of tools and methodologies that support the strategic decision making process of selecting energy saving measures, which are viable and environmental friendly. The aim of this paper is the presentation of an innovative intelligent decision support model for the identification of the need for intervention and further evaluation of energy saving

measures in a typical existing building, based on the systematic incorporation of BEMS data (loads, demands and user requirements). The operation of the model is supportive to the decision makers authorized with the energy-efficient performance of the building and responsible for its management (energy auditors and building administration). In addition, the corresponding computerized decision support system and the appraisal of its pilot application to a typical existing office building in Athens, Greece, are presented and discussed. (C) 2008 Elsevier Ltd. All rights reserved.

C1 [Doukas, Haris; Nychtis, Christos; Psarras, John] Natl Tech Univ Athens, Sch Elect & Comp Engr, Decis Support Syst Lab EPU NTUA, GR-15773 Athens, Greece.

RP Doukas, H (reprint author), Natl Tech Univ Athens, Sch Elect & Comp Engr, Decis Support Syst Lab EPU NTUA, 9 Iroon Polytech St, GR-15773 Athens, Greece.

EM h\_doukas@epu.ntua.gr

RI Doukas, Haris/K-9372-2016

OI Doukas, Haris/0000-0002-3369-0592

FU Hellenic General Secretariat for Research and Technology

FX This paper was based on research conducted within the "BUILDING INTELLIGENCE: Energy Savings in Buildings via Intelligent Control and Communications (ESBi2C)" project of the Hellenic Ministry for Development and funded by the Hellenic General Secretariat for Research and Technology (GSRT). The content of the paper is the sole responsibility of its authors and does not necessarily reflect the views of the GSRT.

CR Askounis DT, 1998, ENERGY, V23, P413, DOI 10.1016/S0360-5442(97)00107-2

BALARAS CA, 2002, TOBUS XENIOS EPIQR I

BLOK J, 2001, EC EVALUATION SECTOR

Blok K., 2004, J IND ECOL, V8, P87

Capehart BL, 2003, GUIDE ENERGY MANAGEM

\*CHAR I BUILD SERV, 1991, EN AUD SURV

Clark G., 1997, Automation in Construction, V6, P481, DOI 10.1016/S0926-5805(97)00026-5

\*CLEAN EN DEC SUPP, 2006, RETSCR INT CLEAN PRO

Doukas H, 2007, BUILD ENVIRON, V42, P3562, DOI 10.1016/j.buildenv.2006.10.024

\*EN STAR, 2005, TOOLS TRAD EN STAR C

[Anonymous], 2005, EN BAL SHEETS DAT 20

\*EUR COMM, 2006, EUR COMM DIR GEN EN

European Commission, 2003, EUR COMM DIR GEN EN

Farag AS, 1999, ENERG CONVERS MANAGE, V40, P527, DOI 10.1016/S0196-8904(98)00120-4

GIARRANTANO JS, 1998, CLIPS USERS GUIDE

\*GREEN GLOB, GREEN GLOB US GREEN

GUO B, 1993, ENERG BUILDINGS, V20, P115, DOI 10.1016/0378-7788(93)90002-C

Laudon K. C., 2000, MANAGEMENT INFORM SY

\*LDK CONS, 2007, FIN DET ZENON FAC EN

LECHTENBOHMER S, 2005, MIDTERM POTENTIAL DE

LIVERIS P, 1996, ENERGY EFFICIENCY GU

MALAMATENIOS C, 2000, TECHNICAL GUIDES ENE

Mathews EH, 2003, BUILD ENVIRON, V38, P1423, DOI 10.1016/S0360-1323(03)00070-2

Mills E, 2006, ENERG POLICY, V34, P188, DOI 10.1016/j.enpol.2004.08.042

\*NIST, 2002, BUILD ENV EC SUST

O'Sullivan DTJ, 2004, ENERG BUILDINGS, V36, P1075, DOI 10.1016/j.enbuild.2004.03.003

Papamichael K., 1997, Automation in Construction, V6, P341, DOI 10.1016/S0926-5805(97)00043-5

Pfafferott J, 2004, ENERG BUILDINGS, V36, P455, DOI 10.1016/j.enbuild.2004.01.041

\*REG AUTH EN, 2004, EN SYST GREEC

Zhu YM, 2006, ENERG BUILDINGS, V38, P421, DOI 10.1016/j.enbuild.2005.07.007

NR 30

TC 61

Z9 62

U1 2

U2 16

PU PERGAMON-ELSEVIER SCIENCE LTD

PI OXFORD

PA THE BOULEVARD, LANGFORD LANE, KIDLINGTON, OXFORD OX5 1GB, ENGLAND  
 SN 0360-1323  
 J9 BUILD ENVIRON  
 JI Build. Environ.  
 PD FEB  
 PY 2009  
 VL 44  
 IS 2  
 BP 290  
 EP 298  
 DI 10.1016/j.buildenv.2008.03.006  
 PG 9  
 WC Construction & Building Technology; Engineering, Environmental;  
 Engineering, Civil  
 SC Construction & Building Technology; Engineering  
 GA 401TH  
 UT WOS:000262964800008  
 DA 2018-05-03  
 ER

PT J  
 AU Davis, LW  
 AF Davis, Lucas W.  
 TI Durable goods and residential demand for energy and water: evidence from  
 a field trial  
 SO RAND JOURNAL OF ECONOMICS  
 LA English  
 DT Article  
 ID EFFICIENCY STANDARDS; ELECTRICITY DEMAND; ALLOCATION; APPLIANCE; TIME;  
 US

AB This article describes a household production model in which energy-efficient durable goods cost less to operate so households may use them more. The model is estimated using household-level data from a field trial in which participants received high-efficiency clothes washers free of charge. The estimation strategy exploits this quasi-random replacement of washers to derive precise estimates of the household production technology and a demand function for clothes washing. During the field trial, households increased clothes washing on average by 5.6% after receiving a high-efficiency washer, implying a price elasticity of  $-0.06$ . The complete model is used to evaluate the cost-effectiveness of recent changes in minimum efficiency standards for clothes washers.

C1 Univ Michigan, Ann Arbor, MI 48109 USA.  
 RP Davis, LW (reprint author), Univ Michigan, Ann Arbor, MI 48109 USA.  
 EM lwdavis@umich.edu

CR BECKER GS, 1965, ECON J, V75, P493, DOI 10.2307/2228949  
 Bernard JT, 1996, CAN J ECON, V29, P92, DOI 10.2307/136153  
 DUBIN JA, 1984, ECONOMETRICA, V52, P345, DOI 10.2307/1911493  
 DUBIN JA, 1986, RAND J ECON, V17, P310, DOI 10.2307/2555713  
 \*EN INFORM ADM, 2003, DOEEIA0581  
 \*EN INFORM ADM, 2004, FHWAPL03010  
 \*EN INFORM ADM, 2006, DOEEIA0383  
 \*EN INFORM ADM, 2005, DOEEIA0384  
 \*EN INFORM ADM, 2005, REV EN STAR CRIT CLO  
 Goldberg PK, 1998, J IND ECON, V46, P1  
 Greene DL, 1999, ENERGY J, V20, P1  
 HAUSMAN JA, 1979, BELL J ECON, V10, P33, DOI 10.2307/3003318  
 MURPHY KM, 1985, J BUS ECON STAT, V3, P370, DOI 10.2307/1391724  
 Nadel S, 2002, ANNU REV ENERG ENV, V27, P159, DOI 10.1146/annurev.energy.27.122001.083452  
 Nordhaus William D., 2006, 12741 NBER  
 PAGAN A, 1984, INT ECON REV, V25, P221, DOI 10.2307/2648877  
 POLLAK RA, 1975, J POLIT ECON, V83, P255, DOI 10.1086/260322

Reiss PC, 2005, REV ECON STUD, V72, P853, DOI 10.1111/0034-6527.00354

REISS PC, RAN J EC IN PRESS

RENWICK M, 1998, MEASURING PRICE RESP

Stern N, 2007, STERN REV EC CLIMATE

TOMLINSON JJ, 1998, ORNLM6382 ORNL DEP E

NR 22

TC 61

Z9 61

U1 3

U2 17

PU BLACKWELL PUBLISHING

PI OXFORD

PA 9600 GARSINGTON RD, OXFORD OX4 2DQ, OXON, ENGLAND

SN 0741-6261

J9 RAND J ECON

JI Rand J. Econ.

PD SUM

PY 2008

VL 39

IS 2

BP 530

EP 546

DI 10.1111/j.0741-6261.2008.00026.x

PG 17

WC Economics

SC Business & Economics

GA 314YI

UT WOS:000256844700010

DA 2018-05-03

ER

PT J

AU Vaage, K

AF Vaage, K

TI Heating technology and energy use: a discrete/continuous choice approach

to Norwegian household energy demand

SO ENERGY ECONOMICS

LA English

DT Article

DE residential energy demand; discrete/continuous choice

AB The aim of this paper is to describe the structure of the household's energy demand as a discrete/continuous choice and, on this basis, establish an econometric model suitable for the data available in the Norwegian Energy Surveys. The discrete appliance choice is specified as a multinomial logit model, with a mixture of appliance attributes (operating costs) and individual characteristics (income, housing unit characteristics, etc.) as explanatory variables. In the next step the continuous choice of energy use is modelled conditional on the appliance choice. The energy prices turn out to be significant both when estimating the appliance choice and the conditional energy demand. The estimated price elasticity for energy exceeds minus unity. The paper discusses how this relatively strong price response should be interpreted in the context of other econometric analysis with no explicit appliance dependence. Finally, the significance of the many household characteristics at both stages of the model signals a high degree of heterogeneity within the households, which justifies the use of detailed micro-data in the modelling of the energy demand. (C) 2000 Elsevier Science B.V. All rights reserved. JEL classifications: C25; D12.

C1 Univ Bergen, Dept Econ, N-5007 Bergen, Norway.

RP Vaage, K (reprint author), Univ Bergen, Dept Econ, Fosswinkelsg 6, N-5007 Bergen, Norway.

CR Ben-Akiva M., 1985, DISCRETE CHOICE ANAL

BJERKHOLT O, 1983, ANAL SUPPLY DEMAND E

Bohi D.R., 1981, ANAL DEMAND BEHAV ST

DAGSVIK JK, 1987, NATURAL GAS MARKETS



Deaton A, 1980, EC CONSUMER BEHAV  
DUBIN JA, 1984, ECONOMETRICA, V52, P118  
HANEMANN WM, 1984, ECONOMETRICA, V52, P541, DOI 10.2307/1913464  
HECKMAN JJ, 1979, ECONOMETRICA, V47, P153, DOI 10.2307/1912352  
HEM KG, 1983, 8312 CENTR BUR STAT  
LJONES A, 1984, 8420 CENTR BUR STAT  
LJONES A, 1992, 922 CENTR BUR STAT  
McFadden Daniel, 1974, FRONTIERS ECONOMETRI  
MUELLBAUER J, 1976, J ECON THEORY, V10, P269  
Nesbakken R., 1993, 9310 CENTR BUR STAT  
RODSETH A, 1976, DEMAND ENERGY NORWEG  
TAYLOR LD, 1975, BELL J ECON, V6, P78  
VAAGE K, 1995, 9 U BERG DEP EC  
VAAGE K, 1998, NORSK OKONOMISK TIDS, V112, P35  
NR 18  
TC 61  
Z9 61  
U1 0  
U2 3  
PU ELSEVIER SCIENCE BV  
PI AMSTERDAM  
PA PO BOX 211, 1000 AE AMSTERDAM, NETHERLANDS  
SN 0140-9883  
J9 ENERG ECON  
JI Energy Econ.  
PD DEC  
PY 2000  
VL 22  
IS 6  
BP 649  
EP 666  
DI 10.1016/S0140-9883(00)00053-0  
PG 18  
WC Economics  
SC Business & Economics  
GA 368HF  
UT WOS:000090111100005  
DA 2018-05-03  
ER  
  
PT J  
AU van Ruijven, BJ  
van Vuuren, DP  
de Vries, BJM  
Isaac, M  
van der Sluijs, JP  
Lucas, PL  
Balachandra, P  
AF van Ruijven, Bas J.  
van Vuuren, Detlef P.  
de Vries, Bert J. M.  
Isaac, Morna  
van der Sluijs, Jeroen P.  
Lucas, Paul L.  
Balachandra, P.  
TI Model projections for household energy use in India  
SO ENERGY POLICY  
LA English

DT Article

DE Household energy consumption; Energy modelling; India

ID WORLDS POOR; DEVELOPING-COUNTRIES; DISCOUNT RATES; COOKING; SECTOR;  
DEATON,ANGUS; TECHNOLOGIES; EMISSIONS; CLIMATE; DEMAND

AB Energy use in developing countries is heterogeneous across households. Present day global energy models are mostly too aggregate to account for this heterogeneity. Here, a bottom-up model for residential energy use that starts from key dynamic concepts on energy use in developing countries is presented and applied to India. Energy use and fuel choice is determined for five end-use functions (cooking, water heating, space heating, lighting and appliances) and for five different income quintiles in rural and urban areas. The paper specifically explores the consequences of different assumptions for income distribution and rural electrification on residential sector energy use and CO<sub>2</sub> emissions, finding that results are clearly sensitive to variations in these parameters. As a result of population and economic growth, total Indian residential energy use is expected to increase by around 65-75% in 2050 compared to 2005, but residential carbon emissions may increase by up to 9-10 times the 2005 level. While a more equal income distribution and rural electrification enhance the transition to commercial fuels and reduce poverty, there is a trade-off in terms of higher CO<sub>2</sub> emissions via increased electricity use. (C) 2011 Elsevier Ltd. All rights reserved.

C1 [van Ruijven, Bas J.; van Vuuren, Detlef P.; de Vries, Bert J. M.; Isaac, Morna; Lucas, Paul L.] Netherlands Environm Assessment Agcy PBL, NL-3720 BA Bilthoven, Netherlands.

[van der Sluijs, Jeroen P.] Univ Utrecht, Copernicus Inst, Dept Sci Technol & Soc, NL-3584 CD Utrecht, Netherlands.

[Balachandra, P.] Indian Inst Sci, Dept Management Studies, Bangalore 560012, Karnataka, India.

[van Vuuren, Detlef P.; de Vries, Bert J. M.] Univ Utrecht, Dept Geosci, NL-3508 TA Utrecht, Netherlands.

RP van Ruijven, BJ (reprint author), Natl Ctr Atmospher Res, POB 3000, Boulder, CO 80307 USA.

EM vruijven@ucar.edu; detlef.vanvuuren@pbl.nl; bert.devries@pbl.nl;

morna\_isaac@hotmail.com; j.p.vandersluijs@uu.nl; paul.lucas@pbl.nl;

patilb@mgmt.iisc.ernet.in

RI Patil, Balachandra/C-2021-2009; van Ruijven, Bas/G-8106-2011; van der

Sluijs, Jeroen/B-6302-2008; van Vuuren, Detlef/A-4764-2009; feng,

tingting/A-9545-2012

OI Patil, Balachandra/0000-0002-5218-2112; van Ruijven,

Bas/0000-0003-1232-5892; van der Sluijs, Jeroen/0000-0002-1346-5953; van

Vuuren, Detlef/0000-0003-0398-2831; Lucas, Paul/0000-0003-0292-7830

FU DG-Research of the European Commission

FX The contribution of Bas van Ruijven and Paul Lucas has benefited from funding of the POEM project (DG-Research of the European Commission).

The contribution of Detlef van Vuuren was supported by funding of the RESPONSES project (DG Research of the European Commission).

CR Akpinar-Ferrand E, 2010, ENVIRON SCI POLICY, V13, P702, DOI 10.1016/j.envsci.2010.09.009

ANG BW, 1986, ENERGY, V11, P315, DOI 10.1016/0360-5442(86)90090-3

Bakkes J., 2008, BACKGROUND REPORT OE, P186

Bhattacharyya SC, 2010, ENER POLICY, V38, P1979, DOI 10.1016/j.enpol.2009.11.079

BOSE RK, 1991, BIOMASS BIOENERG, V1, P99

Cypher JM, 1997, PROCESS EC DEV

Daioglou V., RESIDENTIAL EN UNPUB

Deaton A, 2005, WORLD BANK RES OBSER, V20, P177, DOI 10.1093/wbro/lki009

Deaton A, 2001, WORLD BANK RES OBSER, V16, P125, DOI 10.1093/wbro/16.2.125

D'Sa A, 2004, ENERGY SUSTAIN DEV, V8, P91, DOI DOI 10.1016/50973-0826(08)60471-8

Dzioubinski O., 1999, TRENDS CONSUMPTION P

Eklholm T, 2010, ENER POLICY, V38, P5696, DOI 10.1016/j.enpol.2010.05.017

EnergieNed, 2004, BAS AARDG KLEINV

ESMAP, 2003, ACC POOR CLEAN HOUS, P96

Eurostat, 2006, URB AUD PROGR

Farsi M, 2007, ENVIRON DEV ECON, V12, P757, DOI 10.1017/S1355770X07003932

Foekema H., 2008, WATERGEBRUIK THUIS 2

FXhistory, 2008, HIST CURRENCY EXCHAN

Gangopadhyay S, 2005, ENER POLICY, V33, P2326, DOI 10.1016/j.enpol.2004.04.024

Goett A, 1978, APPLIANCE FUEL CHOIC

Gupta S, 1997, ENER CONVERS MANAGE, V38, P1869, DOI 10.1016/S0196-8904(96)00111-2

- HAUSMAN JA, 1979, BELL J ECON, V10, P33, DOI 10.2307/3003318
- HOSIER RH, 1987, RESOUR ENERG, V9, P347, DOI 10.1016/0165-0572(87)90003-X
- IEA, 2010, WORLD EN OUTL 2010
- IEA, 2005, EN BAL
- IEA (International Energy Agency), 2007, WORLD EN OUTL 2007 C
- IEA, 2004, 30 YEARS EN US IEA C
- IndiaStat.com, 2007, IND STAT INF DAT
- IPCC, 2007, CLIM CHANG 2007 SYNT
- IPCC, 2000, SPEC REP EM SCEN
- ISAAC M, 2008, ENERG POLICY, V37, P507
- Kainuma M, 2003, CLIMATE POLICY ASSES
- Kemmler A, 2007, ENERGY SUSTAIN DEV, V11, P13, DOI DOI 10.1016/S0973-0826(08)60405-6
- Kemmler A, 2007, CHARACTERISTICS ENER, P128
- Koomey J.G., 1995, RESIDENTIAL SECTOR E, P41
- Kumar A, 2003, ENERG POLICY, V31, P259, DOI 10.1016/S0301-4215(02)00038-1
- Letschert V. E., 2007, COPING RESIDENTIAL E
- Serven L, 2006, NORMAL RELATIONSHIP, P30
- Macdonald M, 2000, BENCHMARKING RESIDEN
- Masera OR, 2000, WORLD DEV, V28, P2083, DOI 10.1016/S0305-750X(00)00076-0
- McNeil M.A., 2008, TECHNOECONOMIC ANAL, P27
- McNeil MA, 2008, ENERG POLICY, V36, P3467, DOI 10.1016/j.enpol.2008.05.020
- Mestl HES, 2009, ENERG POLICY, V37, P3009, DOI 10.1016/j.enpol.2009.03.053
- Reddy A. N., 2001, ENERGY SUSTAIN DEV, V5, P81
- New M, 2002, CLIMATE RES, V21, P1, DOI 10.3354/cr021001
- NSSO, 2003, HOUS COND IND
- NSSO, 1997, EN US IND HOUS 5 QUI
- NSSO, 2004, HOUS CONS EXP IND NS, P189
- OECD, 2008, OECD ENV OUTL 2030
- Pachauri S, 2004, ENERG POLICY, V32, P1723, DOI 10.1016/S0301-4215(03)00162-9
- Pachauri S., 2007, ENERGY ANAL HOUSEHOL
- Planning Commission, 2006, REP EXP COMM INT EN
- Price L, 2006, SECTORAL TRENDS GLOB, P68
- Purohit P, 2002, RENEW ENERG, V26, P235, DOI 10.1016/S0960-1481(01)00127-6
- Rao MN, 2007, ENERGY, V32, P143, DOI 10.1016/j.energy.2006.03.012
- Ravallion M, 2001, WORLD BANK RES OBSER, V16, P149, DOI 10.1093/wbro/16.2.149
- Reserve Bank of India, 2007, RES BANK IND HDB STA
- REDDY AKN, 1994, ENERGY, V19, P561, DOI 10.1016/0360-5442(94)90052-3
- Reddy BS, 2006, ENERG POLICY, V34, P2586, DOI 10.1016/j.enpol.2004.08.019
- Reddy B.S., 2006, ENERGY SUSTAIN DEV, V10, P59
- Reddy S, 1996, INT J ENERG RES, V20, P187
- Rehman IH, 2005, ENERG POLICY, V33, P2165, DOI 10.1016/j.enpol.2004.04.014
- Rong F., 2007, CLIMATE CHANGE LONG
- Rutherford RSG, 1955, ECONOMETRICA, V23, P277, DOI 10.2307/1910384
- Schipper L, 2001, ANNU REV ENERG ENV, V26, P49, DOI 10.1146/annurev.energy.26.1.49
- Schipper L, 1992, ENERGY EFFICIENCY HU
- Schipper LJ, 1996, MITIGATION ADAPTATIO, V1, P167
- Shen L, 2006, 2030 ENERGY DEMAND S, P113
- Shukla P.R., 2007, INTEGRATED ASSESMEN, P185
- Shukla P.R., 2003, DEV CLIMATE ASSESSME
- Srinivasan TN, 2001, WORLD BANK RES OBSER, V16, P157, DOI 10.1093/wbro/16.2.157
- SUNDARAM K, 2003, ECON POLIT WEEKLY, V38, P376
- TRAIN K, 1985, ENERGY, V10, P1243, DOI 10.1016/0360-5442(85)90135-5
- UCE STS ECN Ecofys RIVM, 2001, DAT CLEAN EN SUPPL 2
- United Nations Habitat, 1998, GLOB URB IND DAT
- UN-Habitat, 2005, FIN URB SHEL T GLOB R
- [Anonymous], 2007, GLOB ENV OUTL ENV DE
- Urban F, 2007, ENERG POLICY, V35, P3473, DOI 10.1016/j.enpol.2006.12.025
- Utlu Z, 2005, BUILD ENVIRON, V40, P641, DOI 10.1016/j.buildenv.2004.08.006

van Ruijven B, 2010, ENVIRON MODEL ASSESS, V15, P175, DOI 10.1007/s10666-009-9200-z  
 van Ruijven B, 2010, ENERGY, V35, P269, DOI 10.1016/j.energy.2009.09.019  
 Van Ruijven B, 2008, WORLD DEV, V36, P2801, DOI 10.1016/j.worlddev.2008.01.011  
 Van Vuuren D. P., 2007, ENERGY SYSTEMS CLIMA  
 Winer R., 1997, MARKET SCI, V8, P109  
 [Anonymous], 2007, WORLD DEV IND  
 World Bank, 1996, DAT POV GROWTH IND P  
 Xiaohua Wang, 2002, Biomass and Bioenergy, V22, P251, DOI 10.1016/S0961-9534(02)00013-2

NR 87

TC 59

Z9 59

U1 0

U2 32

PU ELSEVIER SCI LTD

PI OXFORD

PA THE BOULEVARD, LANGFORD LANE, KIDLINGTON, OXFORD OX5 1GB, OXON, ENGLAND

SN 0301-4215

J9 ENERGI POLICY

J1 Energy Policy

PD DEC

PY 2011

VL 39

IS 12

BP 7747

EP 7761

DI 10.1016/j.enpol.2011.09.021

PG 15

WC Economics; Energy & Fuels; Environmental Sciences; Environmental Studies

SC Business & Economics; Energy & Fuels; Environmental Sciences & Ecology

GA 866EN

UT WOS:000298363400028

DA 2018-05-03

ER

PT J

AU Dai, HC

Masui, T

Matsuoka, Y

Fujimori, S

AF Dai, Hancheng

Masui, Toshihiko

Matsuoka, Yuzuru

Fujimori, Shinichiro

TI The impacts of China's household consumption expenditure patterns on energy demand and carbon emissions towards 2050

SO ENERGY POLICY

LA English

DT Article

DE Household consumption expenditure pattern; Energy demand and CO2 emissions; Computable general equilibrium model

ID LONG-TERM TRENDS; BOTTOM-UP; DEMATERIALIZATION; SYSTEM; REQUIREMENTS; TECHNOLOGY; MODEL

AB This paper explores how China's household consumption patterns over the period 2005-2050 influence the total energy demand and carbon dioxide (CO<sub>2</sub>) emissions in two baseline scenarios, and how it influences carbon prices as well as the economic cost in the corresponding carbon mitigation scenarios. To this end we first put forward two possible household consumption expenditure patterns up to 2050 using the Working-Leser model, taking into account total expenditure increase and urbanization. For comparison, both expenditure patterns are then incorporated in a hybrid recursive dynamic computable

general equilibrium model. The results reveal that as income level increases in the coming decades, the direct and indirect household energy requirements and CO<sub>2</sub> emissions would rise drastically. When household expenditure shifts from material products and transport to service-oriented goods, around 21,000 mtce(1) of primary energy and 45 billion tons of CO<sub>2</sub> emissions would be saved over the 45-year period from 2005 to 2050. Moreover, carbon prices in the dematerialized mitigation scenario would fall by 13% in 2050, thus reducing the economic cost. 2012 Elsevier Ltd. All rights reserved.

C1 [Dai, Hancheng] Tokyo Inst Technol, Dept Social Engn, Meguro Ku, Tokyo 1528550, Japan.

[Masui, Toshihiko; Fujimori, Shinichiro] Natl Inst Environm Studies, Social & Environm Syst Div, Tsukuba, Ibaraki 3058506, Japan.

[Matsuoka, Yuzuru] Kyoto Univ, Grad Sch Engn, Nishikyo Ku, Kyoto 6068530, Japan.

RP Dai, HC (reprint author), Tokyo Inst Technol, Dept Social Engn, Meguro Ku, 2-12-1 Ookayama, Tokyo 1528550, Japan.

EM dai.h.aa@m.titech.ac.jp; masui@nies.go.jp; matsuoka@env.kyoto-u.ac.jp;  
fujimori.shinichiro@nies.go.jp

RI Fujimori, Shinichiro/A-1288-2015

OI Fujimori, Shinichiro/0000-0001-7897-1796

FU Environment Research and Technology Development Fund of the Ministry of the Environment, Government of Japan [A-1103]

FX This study was supported by the Environment Research and Technology Development Fund (A-1103) of the Ministry of the Environment, Government of Japan. The authors are grateful for the comments from the anonymous reviewers of this paper.

CR Ayres RU, 2005, *ECOL ECON*, V55, P96, DOI 10.1016/j.ecolecon.2004.07.023

Banks J, 1997, *REV ECON STAT*, V79, P527, DOI 10.1162/003465397557015

BERNARDINI O, 1993, *FUTURES*, V25, P431, DOI 10.1016/0016-3287(93)90005-E

Dai HC, 2011, *ENERG POLICY*, V39, P2875, DOI 10.1016/j.enpol.2011.02.062

DEATON A, 1980, *AM ECON REV*, V70, P312

Dimaranan B. V., 2006, *GLOBAL TRADE ASSISTA*

Duarte R., 2009, *ENERG ECON*, V32, P176

Engel E., 1857, *B I INT STAT*, V9

Feng ZH, 2011, *ENERGY*, V36, P656, DOI 10.1016/j.energy.2010.09.049

Hertel T. W., 2004, *STRUCTURE GTAP GLOBA*, V48

IEA, 2010, *EN TECHN PERSP SCEN*

Jackson T, 2008, *ECOL ECON*, V68, P80, DOI 10.1016/j.ecolecon.2008.01.026

Jacoby HD, 2006, *ENERG ECON*, V28, P610, DOI 10.1016/j.eneco.2006.05.014

Jiang K., 2009, *2050 CHINA ENERGY CO*

Jiang K., 2009, *CHINAS LOW CARBON DE*

Kander A, 2005, *ECOL ECON*, V55, P119, DOI 10.1016/j.ecolecon.2004.10.008

Karagiannis G, 2004, *APPL ECON*, V36, P497, DOI 10.1080/00036840410001682205

Kemfert C, 2005, *ECOL ECON*, V54, P293, DOI 10.1016/j.ecolecon.2004.12.031

Lardy N., 2007, *CHINA REBALANCING EC*

LESER CEV, 1963, *ECONOMETRICA*, V31, P694, DOI 10.2307/1909167

Lewbel A., 2006, *ENTRY NEW PALGRAVE D*

Li N., 2010, *THESIS GRADUATE U BE*

Liu HT, 2009, *ENERG POLICY*, V37, P3194, DOI 10.1016/j.enpol.2009.04.016

Mai X., 2011, *BUSINESS EC*, V1, P3

Masui T, 2011, *CLIMATIC CHANGE*, V109, P59, DOI 10.1007/s10584-011-0150-5

Metz B., 2005, *IPCC SPECIAL REPORT*

Ministry of Science and Technology Economy and Energy, 2001, *SUPPL INSTR EST EM G*

Moneta A., 2010, *DISCUSSION PAPERS EC*

Mongelli I, 2010, *ECON SYST RES*, V22, P201, DOI 10.1080/09535314.2010.501428

National People's Congress, 2006, *11 5 YEAR PLAN NAT E*

National People's Congress, 2010, *12 5 YEAR PLAN NAT E*

National Bureau of Statistics (NBS), 2006, *CHIN EN STAT YB 2006*

National Bureau of Statistics of China (NBS), 2008, *QUEST URB RES CONS E*

\*NBS, 2006, *INP OUTP TABL CHIN 2*

National Bureau of Statistics of China (NBS), 2008, *COMP METH CHIN INP O*

National Bureau of Statistics of China (NBS), 1996, *CHIN STAT YB 1996 20*

National Development and Reform Commission (NDRC), 2010, 1587 NDRC  
 Paltsev S., 2005, MIT EMISSIONS PREDIC  
 Papathanasopoulou E, 2010, ENER POLICY, V38, P4152, DOI 10.1016/j.enpol.2010.03.043  
 Park HC, 2007, ENER POLICY, V35, P2839, DOI 10.1016/j.enpol.2006.10.002  
 Peng Z., 2009, INPUT OUTPUT TABLES  
 Reinders AHME, 2003, ENER POLICY, V31, P139, DOI 10.1016/S0301-4215(02)00019-8  
 Rimmer MT, 1996, APPL ECON, V28, P1613, DOI 10.1080/000368496327589  
 Rutherford T. F., 1999, Computational Economics, V14, P1, DOI 10.1023/A:1008655831209  
 Thurlow J, 2008, RECURSIVE DYNAMIC CG  
 UN [ United Nation], 2008, WORLD POP PROSP 2008  
 UN, 2010, NAT ACC MAIN AGGR DA  
 UNEP, 1995, SUST CONS  
 United States Department of Agriculture (USDA), 2011, ERS INT MACR DAT SET  
 Vringer K, 2000, ENER POLICY, V28, P713, DOI 10.1016/S0301-4215(00)00050-1  
 VRINGER K, 1995, ENER POLICY, V23, P893, DOI 10.1016/0301-4215(95)00072-Q  
 Wing IS, 2008, ENER ECON, V30, P547, DOI 10.1016/j.eneco.2006.06.004  
 Wing IS, 2006, ENER POLICY, V34, P3847, DOI 10.1016/j.enpol.2005.08.027  
 Sue Wing I., 2001, INDUCED TECHNICAL CH  
 Working H, 1943, J AM STAT ASSOC, V38, P43, DOI 10.2307/2279311  
 Wu Y., 2002, THEORY ENV TAX ITS A  
 Zhou N., 2011, CHINAS ENERGY CARBON  
 Zhou S., 2010, CONSUMING GUIDE, V3, P5  
 [Anonymous], 2011, CHINA TIMES  
 NR 59  
 TC 58  
 Z9 66  
 U1 12  
 U2 76  
 PU ELSEVIER SCI LTD  
 PI OXFORD  
 PA THE BOULEVARD, LANGFORD LANE, KIDLINGTON, OXFORD OX5 1GB, OXON, ENGLAND  
 SN 0301-4215  
 EI 1873-6777  
 J9 ENER POLICY  
 JI Energy Policy  
 PD NOV  
 PY 2012  
 VL 50  
 BP 736  
 EP 750  
 DI 10.1016/j.enpol.2012.08.023  
 PG 15  
 WC Economics; Energy & Fuels; Environmental Sciences; Environmental Studies  
 SC Business & Economics; Energy & Fuels; Environmental Sciences & Ecology  
 GA 028EO  
 UT WOS:000310405800069  
 DA 2018-05-03  
 ER  
  
 PT J  
 AU Kowsari, R  
     Zerriffi, H  
 AF Kowsari, Reza  
     Zerriffi, Hisham  
 TI Three dimensional energy profile: A conceptual framework for assessing  
     household energy use  
 SO ENERGY POLICY  
 LA English

DT Article

DE Energy analysis; Rural energy; Integrated model

ID DEVELOPING-COUNTRIES; ELECTRICITY CONSUMPTION; EMPIRICAL-EVIDENCE;

INDIAN HOUSEHOLDS; RURAL ENERGY; FUEL CHOICE; MODEL; BEHAVIOR; DEMAND;

ACCESS

AB The provision of adequate, reliable, and affordable energy has been considered as a cornerstone of development. More than one-third of the world's population has a very limited access to modern energy services and suffers from its various negative consequences. Researchers have been exploring various dimensions of household energy use in order to design strategies to provide secure access to modern energy services. However, despite more than three decades of effort, our understanding of household energy use patterns is very limited, particularly in the context of rural regions of the developing world. Through this paper, the past and the current trends in the field of energy analysis are investigated. The literature on rural energy and energy transition in developing world has been explored and the factors affecting households' decisions on energy use are listed. The and the factors affecting households' decisions on energy use are listed. The gaps identified in the literature on rural household energy analysis provide a basis for developing an alternative model that can create a more realistic view of household energy use. The three dimensional energy profile is presented as a new conceptual model for assessment of household energy use. This framework acts as a basis for building new theoretical and empirical models of rural household energy use. (C) 2011 Elsevier Ltd. All rights reserved.

C1 [Kowsari, Reza; Zerriffi, Hisham] Univ British Columbia, Liu Inst Global Issues, Vancouver, BC V5Z 1M9, Canada.

RP Kowsari, R (reprint author), Univ British Columbia, Liu Inst Global Issues, Vancouver, BC V5Z 1M9, Canada.

EM rkowsari@interchange.ubc.ca

OI Zerriffi, Hisham/0000-0003-4890-2575

FU Province of British Columbia under a Pacific Century Trust; University of British Columbia; Liu Institute for Global Issues

FX This work was supported by the Province of British Columbia under a Pacific Century Trust scholarship, a University of British Columbia doctoral fellowship and the Liu Institute for Global Issues Olav Slaymaker Doctoral Fellowship. We would also like to thank our two anonymous reviewers for their helpful comments and suggestions. Their suggestions have greatly improved the final paper. Of course, any errors remain our own.

CR [Anonymous], 1953, Chile maderero, V3, P4

AJZEN I, 1991, ORGAN BEHAV HUM DEC, V50, P179, DOI 10.1016/0749-5978(91)90020-T

Alam MS, 1997, ENERGY, V22, P591, DOI 10.1016/S0360-5442(96)00155-7

Arnold JEM, 2006, WORLD DEV, V34, P596, DOI 10.1016/j.worlddev.2005.08.008

Barnes D., 2004, URBAN HOUSEHOLD ENER

Barnes DF, 1996, ANNU REV ENERG ENV, V21, P497, DOI 10.1146/annurev.energy.21.1.497

Barnes D. F., 2005, URBAN HOUSEHOLD ENER

Barnes Douglas F., 1992, UNDERSTANDING FUELWO

Barnes DF, 1992, URBAN INTERFUEL SUBS

Barnes D.F., 1988, ELECT POWER RURAL GR

Bhatt BP, 2004, BIOMASS BIOENERG, V27, P69, DOI [10.1016/j.biombioe.2003.10.004, 10.1016/j.biomboie.2003.10.004]

BLUFFSTONE RA, 1995, J ENVIRON ECON MANAG, V29, P42, DOI 10.1006/jeeem.1995.1030

Brouwer ID, 1997, WORLD DEV, V25, P255, DOI 10.1016/S0305-750X(96)00100-3

Bruce N, 2000, B WORLD HEALTH ORGAN, V78, P9

Cecelski E., 2002, ENABLING EQUITABLE A

CHAMBWERA M, 2004, EC ANAL URBAN FUELWO

Chaurey A, 2004, ENERG POLICY, V32, P1693, DOI 10.1016/S0301-4215(03)00160-5

CHERFAS J, 1991, SCIENCE, V251, P154, DOI 10.1126/science.251.4990.154

COGOY M, 1995, ECOL ECON, V13, P169, DOI 10.1016/0921-8009(95)00006-U

Cooke P, 2008, ENVIRON DEV ECON, V13, P103, DOI 10.1017/S1355770X0700397X

Davis M, 1998, ENERG POLICY, V26, P207, DOI 10.1016/S0301-4215(97)00100-6

DEWEES PA, 1989, WORLD DEV, V17, P1159, DOI 10.1016/0305-750X(89)90231-3

Dube I, 2003, ENERG POLICY, V31, P1635, DOI 10.1016/S0301-4215(02)00229-X

- Edwards RD, 2004, ENER POLICY, V32, P395, DOI 10.1016/S0301-4215(02)00309-9
- Elias Rebecca J., 2005, PROGRAM ENERGY SUSTA
- \*ESMAP, 2000, EN SERV WORLDS POOR
- ESMAP, 2003, HOUS EN US DEV COUNT
- ESMAP, 2004, RUR EL DEV WORLD SUM
- ESMAP, 2002, EN STRAT RUR IND EV
- ESMAP, 2000, PHOT APPL RUR AR DEV
- ESMAP, 1991, HAIT HOUS EN STRAT J
- ESMAP, 1999, HOUS EN STRAT URB IN
- ESMAP, 2000, SUBS SUST RUR EN SER
- Farsi M, 2007, ENVIRON DEV ECON, V12, P757, DOI 10.1017/S1355770X07003932
- Fernandez VP, 2001, ENER ECON, V23, P305, DOI 10.1016/S0140-9883(00)00066-9
- Fitzgerald KB, 1990, INTERFUEL SUBSTITUTI
- Foster V., 2000, ENERGY CONSUMPTION I
- Frederick S, 2002, J ECON LIT, V40, P351, DOI 10.1257/002205102320161311
- Ghosh S, 2002, ENER POLICY, V30, P125, DOI 10.1016/S0301-4215(01)00078-7
- Goldemberg J, 1996, ENERGY ENV DEV
- GUAGNANO GA, 1995, ENVIRON BEHAV, V27, P699, DOI 10.1177/0013916595275005
- Gundimeda H, 2008, ENER ECON, V30, P517, DOI 10.1016/j.eneco.2006.10.014
- Guptaa Gautam, 2006, ECOLOGICAL EC, Vx, P107
- Hart M, 2004, ENER BUILDINGS, V36, P161, DOI 10.1016/j.enbuild.2003.10.009
- Heltberg R, 2000, LAND ECON, V76, P213, DOI 10.2307/3147225
- Heltberg R, 2005, ENVIRON DEV ECON, V10, P337, DOI 10.1017/S1355770X04001858
- Heltberg R, 2004, ENER ECON, V26, P869, DOI 10.1016/j.eneco.2004.04.018
- HOSIER RH, 1987, RESOUR ENER, V9, P347, DOI 10.1016/0165-0572(87)90003-X
- Howells Mark, 2002, RURAL ENERGY MODELLI, P44
- Howells MI, 2005, ENER POLICY, V33, P1833, DOI 10.1016/j.enpol.2004.02.019
- Hyde WF, 2000, SILVA FENN, V34, P285, DOI 10.14214/sf.632
- IEA, 2010, WORLD EN OUTL 2010
- IEA, 2002, WORLD EN OUTL 2002 I
- IEA, 2006, WORLD EN OUTL 2006
- Jiang Leiwen, 2004, GLOBAL ENERGY ISSUES, V21
- Johansson T.B., 2004, WORLD ENERGY ASSESSM
- Jumbe CBL, 2004, ENER ECON, V26, P61, DOI 10.1016/S0140-9883(03)00058-6
- Keirstead J, 2006, ENER POLICY, V34, P3065, DOI 10.1016/j.enpol.2005.06.004
- Kohlin G, 2005, AM J AGR ECON, V87, P855, DOI 10.1111/j.1467-8276.2005.00774.x
- Kooreman P, 1996, RESOUR ENERGY ECON, V18, P103, DOI 10.1016/0928-7655(95)00017-8
- Laitner John A., 2007, CONTRIBUTION SOCIAL
- LEACH G, 1992, ENER POLICY, V20, P116, DOI 10.1016/0301-4215(92)90105-B
- Leach G., 1987, HOUSEHOLD ENERGY HDB
- LEACH G, 1988, WOODFUEL CRISIS PEOP
- Legros G, 2009, ENERGY ACCESS SITUAT
- Leiwen J, 2003, ENERGY TRANSITION RU
- LUTZENHISER L, 1993, ANNU REV ENER ENV, V18, P247, DOI 10.1146/annurev.energy.18.1.247
- Lutzenhiser L., 2009, BEHAV ASSUMPTIONS UN
- Masera OR, 1997, BIOMASS BIOENERG, V12, P347, DOI 10.1016/S0961-9534(96)00075-X
- Masera OR, 2000, WORLD DEV, V28, P2083, DOI 10.1016/S0305-750X(00)00076-0
- Mestl HES, 2009, ENER POLICY, V37, P3009, DOI 10.1016/j.enpol.2009.03.053
- Modi V., 2005, ENERGY SERVICES MILL
- Pachauri S, 2004, WORLD DEV, V32, P2083, DOI 10.1016/j.worlddev.2004.08.005
- Pachauri S, 2004, ENER POLICY, V32, P1723, DOI 10.1016/S0301-4215(03)00162-9
- Pachauri S, 2003, ENERGY USE ENERGY AC
- Pachauri S., 2007, ENERGY ANAL HOUSEHOL
- Rogers E., 2003, DIFFUSION INNOVATION
- Roy J, 2000, ENER POLICY, V28, P433, DOI 10.1016/S0301-4215(00)00027-6
- Rukato Hesphina, 2002, GENDER PERSPECTIVES
- Saboochi Y, 2001, ENER POLICY, V29, P245, DOI 10.1016/S0301-4215(00)00116-6
- Saghir J, 2005, ENERGY POVERTY MYTHS



SATHAYE J, 1991, ANNU REV ENER ENV, V16, P295  
Schlag N., 2008, MARKET BARRIERS CLEA  
Shove E, 2003, COMFORT CLEANLINESS  
Smith KR, 1987, BIOFUELS AIR POLLUTI  
Stern PC, 2000, J SOC ISSUES, V56, P407, DOI 10.1111/0022-4537.00175  
STERN PC, 1986, J POLICY ANAL MANAG, V5, P200, DOI 10.2307/3323541  
Stokes M, 2004, ENER BUILDINGS, V36, P103, DOI 10.1016/j.enbuild.2003.10.007  
Thom C, 2000, ENERGY SUSTAIN DEV, V4, P36  
Tiwari P, 2000, J POLICY MODEL, V22, P81, DOI 10.1016/S0161-8938(98)00003-9  
TUAN A, 1996, ENER POLICY, V24, P1089  
Urban F, 2007, ENER POLICY, V35, P3473, DOI 10.1016/j.enpol.2006.12.025  
VANRAAIJ WF, 1983, J ECON PSYCHOL, V3, P39, DOI 10.1016/0167-4870(83)90057-0  
Victor D., 2002, VISION GLOBAL ELECTR  
Victor David G., 2009, POLITICS FOSSIL FUEL  
Victor NM, 2002, MACROPATTERNS USE TR  
Webler T, 2010, ENER POLICY, V38, P2690, DOI 10.1016/j.enpol.2010.01.007  
World Energy Council (WEC), 2004, WORLD EN ASS OV 2004  
Whitfield Darby, 2006, HOUSEHOLD BEHAV ENER, P143  
Wilhite Harold, 2001, LEGACY 20 YEARS ENER, P109  
Wilhite Harold, 2000, LEGACY 20 YEARS ENER, P109  
Wilk R, 2002, GLOBAL ENVIRON CHANG, V12, P5, DOI 10.1016/S0959-3780(01)00028-0  
Wilson C, 2007, ANNU REV ENV RESOUR, V32, P169, DOI 10.1146/annurev.energy.32.053006.141137  
Peng Wuyuan, 2008, HOUSEHOLD LEVEL FUEL  
Xiaohua W., 2003, RENEW SUST ENER REV, V7, P545

NR 105

TC 58

Z9 59

U1 0

U2 19

PU ELSEVIER SCI LTD

PI OXFORD

PA THE BOULEVARD, LANGFORD LANE, KIDLINGTON, OXFORD OX5 1GB, OXON, ENGLAND

SN 0301-4215

J9 ENER POLICY

JI Energy Policy

PD DEC

PY 2011

VL 39

IS 12

BP 7505

EP 7517

DI 10.1016/j.enpol.2011.06.030

PG 13

WC Economics; Energy & Fuels; Environmental Sciences; Environmental Studies

SC Business & Economics; Energy & Fuels; Environmental Sciences & Ecology

GA 866EN

UT WOS:000298363400004

DA 2018-05-03

ER

PT J

AU Tzikopoulos, AF

Karatzas, MC

Paravantis, JA

AF Tzikopoulos, AF

Karatzas, MC

Paravantis, JA

TI Modeling energy efficiency of bioclimatic buildings

## SO ENERGY AND BUILDINGS

LA English

DT Article

DE bioclimatic architecture; sustainable architecture; energy efficiency;

passive solar technologies; regression model

ID DESIGN; PERFORMANCE; CLIMATE

AB The application of bioclimatic principles is a critical factor in reducing energy consumption and CO<sub>2</sub> emissions of the building sector. This paper develops a regression model of energy efficiency as a function of environmental conditions, building characteristics and passive solar technologies. A sample of 77 bioclimatic buildings (including 45 houses) was collected, covering Greece, other Mediterranean areas and the rest of Europe. Average energy efficiency varied from 19.6 to 100% with an average of about 68%. Environmental conditions included latitude, altitude, ambient temperature, degree days and sun hours; building characteristics consisted in building area and volume. Passive solar technologies included (among others) solar water heaters, shading, natural ventilation, greenhouses and thermal storage walls. Degree days and a dummy variable indicating location in the Mediterranean area were the strongest predictors of energy efficiency while taller and leaner buildings tended to be more energy efficient. Surprisingly, many passive technologies did not appear to make a difference on energy efficiency while thermal storage walls in fact seemed to decrease energy efficiency. The model developed may be of use to architects, engineers and policy makers. Suggestions for further research include obtaining more building information, investigating the effect of passive solar technologies and gathering information on the usage of building. (C) 2004 Elsevier B.V. All rights reserved.

C1 Univ Piraeus, Dept Technol Educ &amp; Digital Syst, Piraeus 18534, Greece.

RP Paravantis, JA (reprint author), Univ Piraeus, Dept Technol Educ &amp; Digital Syst, 80 Karaoli &amp; Dimitriou St, Piraeus 18534, Greece.

EM jparav@unipi.gr

CR ATHANASAKOU E, 1996, ENERGY, V24, P55

Badescu V, 2003, ENER BUILDINGS, V35, P1077, DOI 10.1016/j.enbuild.2003.10.001

Bodart M, 2002, ENER BUILDINGS, V34, P421, DOI 10.1016/S0378-7788(01)00117-7

CARDINALE N, 2004, ENER BUILDINGS, V35, P153

COCH H, 1998, RENEW SUST ENER REV, V1, P67

\*CRES, 1992, BIOCL ARCH APPL GREE

DIMITRIADIS A, 1989, THERMAL BEHAV SOLA A

Donald A., 1998, PUTTING IT TOGETHER

Etzion Y., 1997, Automation in Construction, V6, P417, DOI 10.1016/S0926-5805(97)00020-4

Gallo C., 1997, SOLAR BUILDINGS EURO

GEORGIADOU E, 1996, BIOCLIMATE DESIGN CE

Heidari S, 2002, ENER BUILDINGS, V34, P607, DOI 10.1016/S0378-7788(02)00011-7

Herzog T., 1996, SOLAR ENERGY ARCHITE

\*I ARCH, ZIPP ROM PER

Kalogirou SA, 2000, ENERGY, V25, P479, DOI 10.1016/S0360-5442(99)00086-9

KARAVASIL M, 2000, WEEKLY B TECHNICAL C, V2125

KARAVASIL M, 1999, BUILDINGS GREEN WORL

KARAVASIL M, 2000, WEEKLY B TECHNICAL C

KAVALARI F, 2001, WEEKLY B TECHNICAL C, V2172

Knowles RL, 2003, ENER BUILDINGS, V35, P15, DOI 10.1016/S0378-7788(02)00076-2

Loveday DL, 2002, ENER BUILDINGS, V34, P573, DOI 10.1016/S0378-7788(02)00007-5

MAGLIOCCO A, 1999, REQUALIFICATION PUBL

Nahar NM, 2003, BUILD ENVIRON, V38, P109, DOI 10.1016/S0360-1323(02)00029-X

OKE TR, 1988, ENER BUILDINGS, V11, P103, DOI 10.1016/0378-7788(88)90026-6

PARAVANTIS J, 1995, ENERGY, V17, P49

PERLIN J, 1980, GOLDEN THREAD 2500 Y

PIMENTEL D, 1994, BIOSCIENCE, V44

Radovic D, 1996, ENER BUILDINGS, V23, P271, DOI 10.1016/0378-7788(95)00952-3

Ratti C, 2003, ENER BUILDINGS, V35, P49, DOI 10.1016/S0378-7788(02)00079-8

Smith P., 1997, CONCEPTS PRACTICE EN

Steele J., 1997, SUSTAINABLE ARCHITEC

Studenmund A. H., 2000, USING ECONOMETRICS P

Tantasavasi C, 2001, ENER BUILDINGS, V33, P815, DOI 10.1016/S0378-7788(01)00073-1

Tombazis AN, 1998, RENEW ENERG, V15, P72, DOI 10.1016/S0960-1481(98)00139-6  
 WACHBERGEN M, 1998, UTILIZATION SOLAR EN  
 Yannas S., 1994, SOLAR ENERGY HOUSING, V1  
 Zain-Ahmed A, 2002, ENER G CONVERS MANAGE, V43, P1725, DOI 10.1016/S0196-8904(01)00007-3  
 ZOGRAFAKIS N, 2000, ENERGY, V62, P112  
 HIST SOLAR ENERGY EF  
 NREL OVERVIEW  
 1993, WEEKLY B TECHNICAL C, V1745  
 1998, GOVT NEWSPAPER 0819

NR 42

TC 58

Z9 58

U1 4

U2 30

PU ELSEVIER SCIENCE SA

PI LAUSANNE

PA PO BOX 564, 1001 LAUSANNE, SWITZERLAND

SN 0378-7788

J9 ENER G BUILDINGS

JI Energy Build.

PD MAY

PY 2005

VL 37

IS 5

BP 529

EP 544

DI 10.1016/j.enbuild.2004.09.002

PG 16

WC Construction & Building Technology; Energy & Fuels; Engineering, Civil

SC Construction & Building Technology; Energy & Fuels; Engineering

GA 902OI

UT WOS:000227366000011

DA 2018-05-03

ER

PT J

AU Chen, JY

Taylor, JE

Wei, HH

AF Chen, Jiayu

Taylor, John E.

Wei, Hsi-Hsien

TI Modeling building occupant network energy consumption decision-making:

The interplay between network structure and conservation

SO ENERGY AND BUILDINGS

LA English

DT Article

DE Agent-based simulation; Behavior; Energy efficiency; Social networks

ID BEHAVIOR; PATTERNS; SYSTEMS; POWER

AB The exposure and diffusion of energy consumption information in building occupant peer networks has been shown to influence an individual's energy consumption decisions. In this paper, we develop an agent-based computational model for individual energy consumption behavior based on data collected during an experiment on residential energy use. We simulate the building occupants' decision making and the information transmission process. By comparing the impact of several parameters in the network level computational model and validating the parameters in a second experimental setting, our research serves to clarify how network relations can be leveraged for modifying energy consumption behavior. Network degree and weight were identified as the major structural parameters that impact building occupants' conservation decisions, while network size was found to have no significant impact. These findings have

important implications for the design and effectiveness of residential energy feedback systems designed to promote energy conservation in residential buildings. (C) 2011 Elsevier B.V. All rights reserved.

C1 [Taylor, John E.] Virginia Tech, Charles E Via Jr Dept Civil & Environm Engr, Blacksburg, VA 24061 USA.  
[Chen, Jiayu] Columbia Univ, Dept Civil Engr & Engr Mech, New York, NY 10027 USA.

[Wei, Hsi-Hsien] Univ Maryland, Dept Civil & Environm Engr, College Pk, MD 20742 USA.

RP Taylor, JE (reprint author), Virginia Tech, Charles E Via Jr Dept Civil & Environm Engr, 113B Patton Hall, Blacksburg, VA 24061 USA.

EM jc3252@columbia.edu; jet@vt.edu; hw2208@umd.edu

RI Taylor, John/F-1002-2011

OI Chen, Jiayu/0000-0001-9396-0059

FU National Science Foundation [1142379]

FX This material is based in part upon work supported by the National Science Foundation under Grant No. 1142379. Any opinions, findings, and conclusions or recommendations expressed in this material are those of the authors and do not necessarily reflect the views of the National Science Foundation.

CR Ahrweiler P, 2004, SIMULATING KNOWLEDGE

Al-Mumin A, 2003, ENERGBUILDINGS, V35, P549, DOI 10.1016/S0378-7788(02)00167-6

Allcott H., 2010, SCIENCE, V327, P1025

Archer D, 1987, ENERGY EFFICIENCY PE, P69

Azar E, 2012, J COMPUT CIVIL ENG, V26, P506, DOI 10.1061/(ASCE)CP.1943-5487.0000158

Barabasi AL, 1999, SCIENCE, V286, P509, DOI 10.1126/science.286.5439.509

Bonabeau E, 2002, P NATL ACAD SCI USA, V99, P7280, DOI 10.1073/pnas.082080899

Chung W, 2009, ENERGBUILDINGS, V41, P696, DOI 10.1016/j.enbuild.2009.02.001

COSTANZO M, 1986, AM PSYCHOL, V41, P521, DOI 10.1037/0003-066X.41.5.521

Dalamagkidis K, 2007, BUILD ENVIRON, V42, P2686, DOI 10.1016/j.buildenv.2006.07.010

DEMEO EA, 1984, SCIENCE, V224, P245, DOI 10.1126/science.224.4646.245

Elle M, 2010, BUILD ENVIRON, V45, P135, DOI 10.1016/j.buildenv.2009.05.011

Epstein J. M., 1999, Complexity, V4, P41, DOI 10.1002/(SICI)1099-0526(199905/06)4:5<41::AID-CPLX9>3.3.CO;2-6

ERDOS P, 1960, EVOLUTION RANDOM GRA, V5, P17

Festinger L, 1954, HUM RELAT, V7, P117, DOI 10.1177/001872675400700202

Gilbert GN., 2008, AGENT BASED MODELS

Gockeritz S, 2010, EUR J SOC PSYCHOL, V40, P514, DOI 10.1002/ejsp.643

Goldstein NJ, 2008, J CONSUM RES, V35, P472, DOI 10.1086/586910

Hoes P, 2009, ENERGBUILDINGS, V41, P295, DOI 10.1016/j.enbuild.2008.09.008

Kurant M, 2006, PHYS REV LETT, V96, DOI 10.1103/PhysRevLett.96.138701

Macy MW, 2002, ANNU REV SOCIOL, V28, P143, DOI 10.1146/annurev.soc.28.110601.141117

McMakin AH, 2002, ENVIRON BEHAV, V34, P848, DOI 10.1177/001391602237252

MILGRAM S, 1969, J PERS SOC PSYCHOL, V13, P79, DOI 10.1037/h0028070

Nolan JM, 2008, PERS SOC PSYCHOL B, V34, P913, DOI 10.1177/0146167208316691

OLSEN ME, 1981, J SOC ISSUES, V37, P108, DOI 10.1111/j.1540-4560.1981.tb02628.x

Peschiera G, 2010, ENERGBUILDINGS, V42, P1329, DOI 10.1016/j.enbuild.2010.03.001

Petersen E., 2007, INT J SUSTAINABILITY, V8, P16, DOI DOI 10.1108/14676370710717562

Revuz D., 1999, CONTINUOUS MARTINGAL

Richardson I, 2008, ENERGBUILDINGS, V40, P1560, DOI 10.1016/j.enbuild.2008.02.006

Ross M. H., 1981, OUR ENERGY REGAINING

Ross S.M., 2003, MYLIBRARY INTRO PRO

Scott A., 2000, SOCIAL NETWORK ANAL

SELIGMAN C, 1978, ENERGBUILDINGS, V1, P325, DOI 10.1016/0378-7788(78)90012-9

Sjoberg L, 2005, INT REV SOCIOL, V15, P327, DOI 10.1080/03906700500159755

STERN PC, 1992, AM PSYCHOL, V47, P1224, DOI 10.1037//0003-066X.47.10.1224

U. S. DOE, 2007, BUILD EN DAT BOOK

Watts DJ, 1998, NATURE, V393, P440, DOI 10.1038/30918

Wilson C, 2007, ANNU REV ENV RESOUR, V32, P169, DOI 10.1146/annurev.energy.32.053006.141137

Yu Z., 2011, ENERGY BUILDINGS, V43

Zeigler B. P., 2000, THEORY MODELING SIMU

TC 56  
 Z9 57  
 U1 0  
 U2 17  
 PU ELSEVIER SCIENCE SA  
 PI LAUSANNE  
 PA PO BOX 564, 1001 LAUSANNE, SWITZERLAND  
 SN 0378-7788  
 J9 ENERGBUILDINGS  
 JI Energy Build.  
 PD APR  
 PY 2012  
 VL 47  
 BP 515  
 EP 524  
 DI 10.1016/j.enbuild.2011.12.026  
 PG 10  
 WC Construction & Building Technology; Energy & Fuels; Engineering, Civil  
 SC Construction & Building Technology; Energy & Fuels; Engineering  
 GA 914YN  
 UT WOS:000301989800058  
 DA 2018-05-03  
 ER

PT J  
 AU Kelly, S  
 AF Kelly, Scott  
 TI Do homes that are more energy efficient consume less energy?: A  
 structural equation model of the English residential sector

SO ENERGY

LA English

DT Article

DE Residential; Energy; Efficiency; Structural; Equation; Modelling

ID BOTTOM-UP; TOP-DOWN; UK; DEMAND; ELECTRICITY; SCENARIOS; POLICIES; STOCK

AB Energy consumption from the residential sector is a complex socio-technical problem that can be explained using a combination of physical, demographic and behavioural characteristics of a dwelling and its occupants. A structural equation model (SEM) is introduced to calculate the magnitude and significance of explanatory variables on residential energy consumption. The benefit of this approach is that it explains the complex relationships that exist between manifest variables and their overall effect through direct, indirect and total effects. Using the English House Condition Survey (EHCS) consisting of 2531 unique cases, the main drivers behind residential energy consumption are found to be the number of household occupants, floor area, household income, dwelling efficiency (SAP), household heating patterns and living room temperature. In the multivariate case, SAP explains very little of the variance of residential energy consumption. However, this procedure fails to account for simultaneity bias between energy consumption and SAP. Using SEM it is shown that dwelling energy efficiency (SAP), has reciprocal causality with dwelling energy consumption and the magnitude of these two effects are calculable. When non-recursivity between SAP and energy consumption is allowed for, SAP is shown to have a negative effect on energy consumption but conversely, homes with a propensity to consume more energy also have higher SAP rates. (C) 2011 Elsevier Ltd. All rights reserved.

C1 Univ Cambridge, Dept Land Econ, Ctr Climate Change Mitigat, Cambridge CB3 9EP, England.

RP Kelly, S (reprint author), Univ Cambridge, Dept Land Econ, Ctr Climate Change Mitigat, 19 Silver St, Cambridge CB3 9EP, England.

EM sjk64@cam.ac.uk

RI Kelly, Scott/F-8774-2011

OI Kelly, Scott/0000-0002-8454-6144

CR Aydinalp M, 2003, INT J ENERGBUILDINGS, V27, P441, DOI 10.1002/er.887

Aydinalp-Koxsal M, 2008, APPL ENERGBUILDINGS, V85, P271, DOI 10.1016/j.apenergy.2006.09.012

Azadeh A, 2010, ENERGY, V35, P2351, DOI 10.1016/j.energy.2009.12.023

Baker KJ, 2008, APPL ENERG, V85, P475, DOI 10.1016/j.apenergy.2007.09.004  
 BAKER P, 1989, ECON J, V99, P720, DOI 10.2307/2233767  
 Bohringer C, 2009, J ECON DYN CONTROL, V33, P1648, DOI 10.1016/j.jedc.2008.12.007  
 Boonekamp PGM, 2007, ENERG ECON, V29, P133, DOI 10.1016/j.eneco.2005.09.010  
 BRE, 2005, GOV STAND ASS PROC E  
 Cambridge Architectural Research, 2009, MOD GREENH GAS EM SC  
 Cheng V, 2011, ENVIRON MODELL SOFTW, V26, P1186, DOI 10.1016/j.envsoft.2011.04.005  
 \*COMM LOC GOV, 2005, EHCS TECH REP  
 Communities Local Government, 2006, BUILD GREEN FUT ZER  
 \*COMM LOC GOV, 2010, ENGL HOUS SURV EHS H  
 \*CTR ALT TECHN, 2007, ZER CARB BRIT  
 DECC, 2009, HEAT EN SAV STRAT CO  
 \*DEFRA, 2001, BREDEM 12 MOD DESCR  
 Department for Communities and Local Government, 2007, BUILD GREEN FUT  
 Department for the Environment Transport and the Regions (DETR), ENGL HOUS COND SURV  
 Grant P., 2006, STAT REAL LIFE SAMPL  
 DOUTHITT RA, 1989, ENERGY, V14, P187, DOI 10.1016/0360-5442(89)90062-5  
 Dresner S, 2006, FISC STUD, V27, P47, DOI 10.1111/j.1475-5890.2006.00027.x  
 ECI, 2005, 40 HOUS  
 \*EL EN LTD, 2008, EN EFF PARTN ASS SIZ  
 Firth SK, 2010, BUILD RES INF, V38, P25, DOI 10.1080/09613210903236706  
 FOUQUET R, 1995, ENERG ECON, V17, P237, DOI 10.1016/0140-9883(95)00015-M  
 Herring H, 2006, ENERGY, V31, P10, DOI 10.1016/j.energy.2004.04.055  
 HITCHCOCK G, 1993, ENERG BUILDINGS, V20, P151, DOI 10.1016/0378-7788(93)90006-G  
 Hoogwijk M, 2008, SECTORAL EMISSION MI  
 Hunt LC, 2003, ENERG ECON, V25, P93, DOI 10.1016/S0140-9883(02)00072-5  
 Jebaraj S, 2006, RENEW SUST ENERG REV, V10, P281, DOI 10.1016/j.rser.2004.09.004  
 Johnston DA, 2003, PHYS BASED ENERGY CA  
 Kavgic M, 2010, BUILD ENVIRON, V45, P1683, DOI 10.1016/j.buildenv.2010.01.021  
 Keith T. Z., 2006, MULTIPLE REGRESSION  
 Kline R. B., 2005, PRINCIPLES PRACTICE  
 Lee Sik-Yum, 2007, STRUCTURAL EQUATION  
 Levine M, 2008, RESIDENTIAL COMMERCIAL  
 Lijesen MG, 2007, ENERG ECON, V29, P249, DOI 10.1016/j.eneco.2006.08.008  
 Madlener R, 2009, ENERGY, V34, P370, DOI 10.1016/j.energy.2008.10.011  
 McFarland JR, 2004, ENERG ECON, V26, P685, DOI 10.1016/j.eneco.2004.04.026  
 MCKINSEY, 2008, SUSTAINABLE URBAN IN  
 McKinsey, 2009, PATHWAYS LOW CARBON  
 MICKLEWRIGHT J, 1989, ENERG POLICY, V17, P264, DOI 10.1016/0301-4215(89)90051-7  
 RUBIN DB, 1976, BIOMETRIKA, V63, P581, DOI 10.2307/2335739  
 Rylatt R., 2003, Building Services Engineering Research & Technology, V24, P93, DOI 10.1191/0143624403bt061oa  
 SCHUMACKER RE, 1996, ADV STRUCTURAL EQUAT  
 Shorrocks LD, 1997, ENERG POLICY, V25, P1027, DOI 10.1016/S0301-4215(97)00130-4  
 Shorrocks LD, 2003, DETAILED ANAL HIST R  
 Sorrell S., 2007, REBOUND EFFECT  
 Steemers K, 2009, BUILD RES INF, V37, P625, DOI 10.1080/09613210903186661  
 Strachan N, 2008, ENERG ECON, V30, P2947, DOI 10.1016/j.eneco.2008.04.009  
 Summerfield AJ, 2010, BUILD RES INF, V38, P12, DOI 10.1080/09613210903399025  
 Swan LG, 2009, RENEW SUST ENERG REV, V13, P1819, DOI 10.1016/j.rser.2008.09.033  
 Tabachnick B. G., 2007, USING MULTIVARIATE S  
 Tso GKF, 2007, ENERGY, V32, P1761, DOI 10.1016/j.energy.2006.11.010  
 Tuladhar SD, 2009, ENERG ECON, V31, P223, DOI 10.1016/j.eneco.2009.07.007  
 VERNON T, 2007, PERSONALITY INDIVIDU, V42, DOI DOI 10.1016/S0191-8869(07)00013-X  
 World Business Council for Sustainable Development, 2009, EN EFF BUILD TRANSF  
 WWF, 2007, WWF BUILD STOCK REP

Z9 58  
 U1 1  
 U2 20  
 PU PERGAMON-ELSEVIER SCIENCE LTD  
 PI OXFORD  
 PA THE BOULEVARD, LANGFORD LANE, KIDLINGTON, OXFORD OX5 1GB, ENGLAND  
 SN 0360-5442  
 J9 ENERGY  
 JI Energy  
 PD SEP  
 PY 2011  
 VL 36  
 IS 9  
 BP 5610  
 EP 5620  
 DI 10.1016/j.energy.2011.07.009  
 PG 11  
 WC Thermodynamics; Energy & Fuels  
 SC Thermodynamics; Energy & Fuels  
 GA 824ZZ  
 UT WOS:000295242000020  
 DA 2018-05-03  
 ER

PT J

AU Hiemstra-van der Horst, G  
 Hovorka, AJ

AF Hiemstra-van der Horst, Greg  
 Hovorka, Alice J.

TI Reassessing the "energy ladder": Household energy use in Maun, Botswana

SO ENERGY POLICY

LA English

DT Article

DE fuelwood; urban energy; Africa

ID SOUTH-AFRICA; DEVELOPING-COUNTRIES; URBAN-POOR; DEFORESTATION;

TRANSITION; FUELWOOD; CONSUMPTION; ZIMBABWE; SUBSTITUTION; DYNAMICS

AB In the context of Sub-Saharan Africa's rapid urbanization, improved insight into urban energy use is increasingly important. Based on the predictions of "energy transition" theory, a regional shift from biomass to "modern" fuels has long been expected to occur in tandem with urban growth. However, trends observed in the region's towns and cities have often not followed such patterns and fuelwood continues to be important in most areas. This paper examines the practical relevance of transition theory using a recent case study, conducted by the authors in Maun, Botswana, and results previously reported in the literature. It finds that, despite the long-term link between socio-economic development and increased modern fuel consumption at the national scale, the notion of "transition" does not accurately reflect ongoing energy-use patterns at lower levels of aggregation. This is chiefly because its model of household fuel switching largely dismisses the importance of active (and strategic) decision making by urban consumers and their responsiveness to structural factors such as relative fuel prices. As the Botswana case illustrates, this weakness can significantly distort expectations and policies around urban fuelwood use. (C) 2008 Elsevier Ltd. All rights reserved.

C1 [Hiemstra-van der Horst, Greg; Hovorka, Alice J.] Univ Guelph, Dept Geog, Guelph, ON N1G 2W1, Canada.

RP Hovorka, AJ (reprint author), Univ Guelph, Dept Geog, Hutt Bldg, Guelph, ON N1G 2W1, Canada.

EM gvanderh@uoguelph.ca; ahovor-ka@uoguelph.ca

FU Social Sciences and Humanities Research Council of Canada

FX Funding for this research was provided by the Social Sciences and Humanities Research Council of Canada. The authors also wish to thank the Government of Botswana and the Department of Environmental Science at the University of Botswana for institutional and academic support

throughout this project. Special thanks are due to Drs. Gwebu, Kgathi and van der Post; Boiki Mabowe of the Energy Affairs Division; Kerileng Thela of the Department of Town and Regional Planning as well as numerous people at the Twana Land Board for enthusiastic support and assistance. Thanks also to an anonymous reviewer for helpful comments on this paper.

- CR Akabah EM, 1990, ENERG ECON, V12, P227
- ALLEN JC, 1985, J DEV ECON, V19, P59, DOI 10.1016/0304-3878(85)90039-2
- ALLEN JC, 1985, ANN ASSOC AM GEOGR, V75, P163, DOI 10.1111/j.1467-8306.1985.tb00079.x
- ANDERSON D, 1986, WORLD DEV, V14, P853, DOI 10.1016/0305-750X(86)90036-7
- Arnold JEM, 2006, WORLD DEV, V34, P596, DOI 10.1016/j.worlddev.2005.08.008
- ARON J, 1991, BIOMASS BIOENERG, V1, P89, DOI 10.1016/0961-9534(91)90031-7
- Aweto AW, 1995, OPEC REV, V4, P333
- Banks DI, 1996, BIOMASS BIOENERG, V11, P319, DOI 10.1016/0961-9534(96)00031-1
- BEMBRIDGE TJ, 1990, S AFRICAN J FORESTRY, V155, P42
- Boahene K, 1998, LAND DEGRAD DEV, V9, P247, DOI 10.1002/(SICI)1099-145X(199805/06)9:3<247::AID-LDR278>3.0.CO;2-G
- BOBERG J, 1993, ENERG POLICY, V21, P474, DOI 10.1016/0301-4215(93)90036-F
- BRINKHOFF T, 2006, CITY POPULATION
- Brouwer R, 2004, BIOMASS BIOENERG, V27, P233, DOI 10.1016/j.biombioe.2004.01.005
- Campbell BM, 2003, ENERG POLICY, V31, P553, DOI 10.1016/S0301-4215(02)00098-8
- CLINECOLE RA, 1990, WORLD DEV, V18, P513, DOI 10.1016/0305-750X(90)90068-9
- \*CSO, 2003, HOUS INC EXP SURV
- \*CSO, 2002, EN STAT
- DANG H, 1993, ENVIRON MANAGE, V17, P283, DOI 10.1007/BF02394671
- Davis M, 1998, ENERG POLICY, V26, P207, DOI 10.1016/S0301-4215(97)00100-6
- de Montalembert MR, 1983, 42 FAO
- DEWEES PA, 1989, WORLD DEV, V17, P1159, DOI 10.1016/0305-750X(89)90231-3
- DOVIE BKD, 2004, GEOJOURNAL, P1
- \*DTRP, 1997, MAUN PLANN AR UNPUB
- \*EAD, 2001, FUELW US PATT FUT ST
- \*EAD, 2004, BOTSW EN MAST PLAN
- EBERHARD AA, 1989, ENERG POLICY, V17, P424, DOI 10.1016/0301-4215(89)90014-1
- Eckholm E., 1975, OTHER ENERGY CRISIS
- Fisher M, 2004, ENVIRON DEV ECON, V9, P135, DOI 10.1017/S1355770X03001219
- Foley G., 2001, 013 ESMAP
- FOLEY G, 1995, ENERGY WORLD BANK
- FRENCH D, 1986, WORLD DEV, V14, P531, DOI 10.1016/0305-750X(86)90068-9
- GWEBU T, 2003, GEOJOURNAL, V56, P83
- GWEBU T, 2003, URBANIZATION BOTSWAN
- HOSIER RH, 1993, ENERG POLICY, V21, P454, DOI 10.1016/0301-4215(93)90035-E
- HOSIER RH, 1987, RESOUR ENER, V9, P347, DOI 10.1016/0165-0572(87)90003-X
- Hovorka A. J., 2004, Journal of Contemporary African Studies, V22, P367, DOI 10.1080/0258900042000283511
- Hovorka AJ, 2006, GENDER PLACE CULT, V13, P207, DOI 10.1080/09663690600700956
- IJAGBEMI B, 2003, J POLITICAL ECOLOGY, V10, P57
- Karekezi S, 2002, ENERG POLICY, V30, P1015, DOI 10.1016/S0301-4215(02)00055-1
- Kebede B, 2002, ENERG POLICY, V30, P1029, DOI 10.1016/S0301-4215(02)00056-3
- Kersten I, 1998, ENERGY, V23, P887, DOI 10.1016/S0360-5442(98)00025-5
- KGATHI DL, 1992, HOUSEHOLD RESPONSE F
- LEACH G, 1992, ENERG POLICY, V20, P116, DOI 10.1016/0301-4215(92)90105-B
- LEACH G, 1988, WOODFUEL CRISIS PEOP
- LEACH GA, 1988, ANNU REV ENERGY, V13, P47
- Martins J, 2005, SOC INDIC RES, V72, P373, DOI 10.1007/s11205-004-5583-z
- Marufu L, 1997, BIOMASS BIOENERG, V12, P53, DOI 10.1016/S0961-9534(96)00067-0
- Masera OR, 1997, BIOMASS BIOENERG, V12, P347, DOI 10.1016/S0961-9534(96)00075-X
- Masera OR, 2000, WORLD DEV, V28, P2083, DOI 10.1016/S0305-750X(00)00076-0
- \*MFDP, 2003, NAT DEV PLAN, V9



\*MFDP, 1991, NAT DEV PLAN, V7  
 \*MFDP, 1997, NAT DEV PLAN, V8  
 \*MFDP, 1985, NAT DEV PLAN, V6  
 MILUKAS MV, 1993, ENERG POLICY, V21, P543, DOI 10.1016/0301-4215(93)90040-M  
 Murphy JT, 2001, TECHNOL FORECAST SOC, V68, P173, DOI 10.1016/S0040-1625(99)00091-8  
 Odihi J, 2003, APPL GEOGR, V23, P227, DOI 10.1016/j.apgeog.2003.08.004  
 \*ODMPPS, 2006, OK DELT MAN PLAN PRO  
 SOUSSAN J, 1990, ENERG POLICY, V18, P572, DOI 10.1016/0301-4215(90)90208-L  
 VANDERPLAS RJ, 2005, CHAD ENERGY PLOICY, V33, P297  
 NR 59  
 TC 55  
 Z9 56  
 U1 4  
 U2 28  
 PU ELSEVIER SCI LTD  
 PI OXFORD  
 PA THE BOULEVARD, LANGFORD LANE, KIDLINGTON, OXFORD OX5 1GB, OXON, ENGLAND  
 SN 0301-4215  
 J9 ENERG POLICY  
 JI Energy Policy  
 PD SEP  
 PY 2008  
 VL 36  
 IS 9  
 BP 3333  
 EP 3344  
 DI 10.1016/j.enpol.2008.05.006  
 PG 12  
 WC Economics; Energy & Fuels; Environmental Sciences; Environmental Studies  
 SC Business & Economics; Energy & Fuels; Environmental Sciences & Ecology  
 GA 353TW  
 UT WOS:000259592200011  
 DA 2018-05-03  
 ER  
  
 PT J  
 AU Barton, J  
     Huang, SK  
     Infield, D  
     Leach, M  
     Ogunkunle, D  
     Torriti, J  
     Thomson, M  
 AF Barton, John  
     Huang, Sikai  
     Infield, David  
     Leach, Matthew  
     Ogunkunle, Damiete  
     Torriti, Jacopo  
     Thomson, Murray  
 TI The evolution of electricity demand and the role for demand side  
    participation, in buildings and transport  
 SO ENERGY POLICY  
 LA English  
 DT Article  
 DE Transition; Pathways; Demand side management  
 ID THERMAL-ENERGY STORAGE; HEAT; FUEL

AB This paper explores the possible evolution of UK electricity demand as we move along three potential transition pathways to a low carbon economy in 2050. The shift away from fossil fuels through the electrification of demand is discussed, particularly through the uptake of heat pumps and electric vehicles in the domestic and passenger transport sectors. Developments in the way people and institutions may use energy along each of the pathways are also considered and provide a rationale for the quantification of future annual electricity demands in various broad sectors. The paper then presents detailed modelling of hourly balancing of these demands in the context of potential low carbon generation mixes associated with the three pathways. In all cases, hourly balancing is shown to be a significant challenge. To minimise the need for conventional generation to operate with very low capacity factors, a variety of demand side participation measures are modelled and shown to provide significant benefits. Lastly, projections of operational greenhouse gas emissions from the UK and the imports of fossil fuels to the UK for each of the three pathways are presented. (C) 2012 Elsevier Ltd. All rights reserved.

C1 [Thomson, Murray] Univ Loughborough, Sch Elect Elect & Syst Engr, CREST, Loughborough LE11 3TU, Leics, England.

[Huang, Sikai; Infield, David] Univ Strathclyde, Inst Energy & Environm, Glasgow G1 1XW, Lanark, Scotland.

[Leach, Matthew; Ogunkunle, Damiete] Univ Surrey, Ctr Environm Strategy, Guildford GU27XH, Surrey, England.

[Torriti, Jacopo] Univ Reading, Sch Construct Management & Engr, Reading RG6 6AY, Berks, England.

RP Thomson, M (reprint author), Univ Loughborough, Sch Elect Elect & Syst Engr, CREST, Holywell Pk, Loughborough LE11 3TU, Leics, England.

EM M.Thomson@Lboro.ac.uk

OI Torriti, Jacopo/0000-0003-0569-039X

FU Engineering and Physical Sciences Research Council, UK [EP/F022832/1]

FX This work was supported by the Engineering and Physical Sciences

Research Council, UK, within the Transition Pathways to a Low Carbon Economy project (EP/F022832/1).

CR ACHA S, 2011, IEEE PES INN SMART G

Barnacle M., 2012, ENERGY POLICY

Barton J, 2010, J POWER SOURCES, V195, P8222, DOI 10.1016/j.jpowsour.2009.12.100

Boardman, 2007, 34 U OXF ENV CHANG I

Committee On Climate Change, 2008, BUILD LOW CARB EC UK

Darling A., 2007, 7124 BIS CM DEP BUS

Day G, 2009, SCOTLAND WIND POWER

DCLG, 2011, ZER CARB HOM IMP ASS

DECC, 2010, DECC 2050 PATHW CALC

DECC, EN CONS UK DOM DAT T

Ea Energy Analyses, 2012, STREAM EN SCEN MOD T

ECUK, 2008, DTI PUBL

Element Energy, 2009, UPT EN EFF BUILD BEH

Elxon Ltd, 1997, EL US LOAD PROF PROF

Energy Efficiency Partnership for Homes, 2008, ASS SIZ UK HOUS EN E

EnergyPLAN, 2012, SUST EN PLANN RES GR

ETI, 2012, EN SYST MOD ENV ESME

Fernandes D, 2012, ENERGY, V39, P246, DOI 10.1016/j.energy.2012.01.024

Foxon, ENERGY POLICY

Hasnain SM, 1998, ENERG CONVERS MANAGE, V39, P1127, DOI 10.1016/S0196-8904(98)00025-9

Hawkes AD, 2007, J POWER SOURCES, V164, P260, DOI 10.1016/j.jpowsour.2006.10.083

Hendry C., 2010, SMART METERING PROGR

Huang S, 2009, P 44 INT U POW ENG C

IAEA, 2012, WASP WIEN AUT SYST P

Infield D, 2007, IET RENEW POWER GEN, V1, P1, DOI 10.1049/iet-rpg:20079010

IPSOS-RSL and Office for National Statistics, 2003, UK TIM US SURV 2000

iSUSI, 2012, SUST SOL INN

Kalogirou SA, 2004, ENERG CONVERS MANAGE, V45, P3075, DOI 10.1016/j.enconman.2003.12.019

Kannan R., 2007, UK MARKAL MODEL DOCU

Kannan R., 2009, MODELLING UK RESIDEN

Lannen N., 2012, NEW PUMPED STORAGE P

Leaver JD, 2009, INT J HYDROGEN ENERG, V34, P2855, DOI 10.1016/j.ijhydene.2009.01.063  
 Monahan J., 2011, ENERG POLICY, V39, P1  
 [Anonymous], 2011, MET HALF HOUR EL DE  
 Ofgem, 2010, SMART MET REP OFG  
 Ofgem Smart Metering Team & E-Serve, 2010, SMART MET IMPL PROGR  
 Ofgem Smart Metering Team, 2011, SMART MET FUNCT REQ  
 Office for National Statistics (ONS), 2005, VIT STAT ENGL WAL 20  
 Shaw C, 2004, POPULATION TRENDS, V118, P6  
 Sinden G, 2007, ENERG POLICY, V35, P112, DOI 10.1016/j.enpol.2005.10.003  
 Woods P., 2004, IMECHE SEM 23 MARCH  
 [Anonymous], 2008, ENERGY EFFICIEN 1030

NR 42

TC 51

Z9 52

U1 2

U2 34

PU ELSEVIER SCI LTD

PI OXFORD

PA THE BOULEVARD, LANGFORD LANE, KIDLINGTON, OXFORD OX5 1GB, OXON, ENGLAND

SN 0301-4215

J9 ENERG POLICY

JI Energy Policy

PD JAN

PY 2013

VL 52

BP 85

EP 102

DI 10.1016/j.enpol.2012.08.040

PG 18

WC Economics; Energy &amp; Fuels; Environmental Sciences; Environmental Studies

SC Business &amp; Economics; Energy &amp; Fuels; Environmental Sciences &amp; Ecology

GA 073WZ

UT WOS:000313775100008

DA 2018-05-03

ER

PT J

AU Peshiera, G

Taylor, JE

AF Peshiera, Gabriel

Taylor, John E.

TI The impact of peer network position on electricity consumption in

building occupant networks utilizing energy feedback systems

SO ENERGY AND BUILDINGS

LA English

DT Article

DE Buildings; Conservation; Electricity consumption feedback; Peer  
networks; Social networks

ID SOCIAL NETWORK; HOUSEHOLD; BEHAVIOR; CONSERVATION

AB There is a growing need to reduce building energy consumption to limit greenhouse gas emissions and lessen the strain on our electricity grids. Researchers have shown that people are more likely to implement conservation practices in response to energy consumption feedback the more socially proximal the norm provided in that feedback. It has also been shown that sharing individual room-level electricity usage information with peers is more effective in inducing consumption reduction than exposure to generic norms. Designers of energy use feedback systems are leveraging social networks to encourage energy-efficient behavior. Yet, despite growing interest in the role of peer networks to induce energy savings, we know little about how properties of peer networks, such as a given user's position in a peer network, impact consumption behavior. In a 22-room study group where building residents shared room-level

electricity consumption information among peer groups in the same building, we tested the correlation of network degree and Eigenvector centrality with percent change in consumption relative to non-participants. This result shows that energy use feedback is more effective in promoting the implementation of energy saving practices as more peers share energy usage information through the feedback system.

This finding underscores the importance of exploring and exploiting linkages between social structure and energy conservation. (C) 2012 Elsevier B.V. All rights reserved.

C1 [Taylor, John E.] Virginia Tech, Charles E Via Jr Dept Civil & Environm Engn, Blacksburg, VA 24061 USA.

[Taylor, John E.] Columbia Univ, Dept Civil Engn & Engn Mech, New York, NY 10027 USA.

RP Taylor, JE (reprint author), Virginia Tech, Charles E Via Jr Dept Civil & Environm Engn, 113B Patton Hall, Blacksburg, VA 24061 USA.

EM gsp2107@columbia.edu; jet@vt.edu

RI Taylor, John/F-1002-2011

FU National Science Foundation [1142379]

FX This material is based in part upon work supported by the National Science Foundation under Grant No. 1142379. Any opinions, findings, and conclusions or recommendations expressed in this material are those of the authors and do not necessarily reflect the views of the National Science Foundation.

CR Abrahamse W, 2005, J ENVIRON PSYCHOL, V25, P273, DOI 10.1016/j.jenvp.2005.08.002

Christakis NA, 2008, NEW ENGL J MED, V358, P2249, DOI 10.1056/NEJMsa0706154

Diamond R, 1987, ENERGY EFFICIENCY PE

Emery AF, 2006, ENERGY, V31, P677, DOI 10.1016/j.energy.2005.04.006

Erhard-Martinez K., 2010, ADV METERING INITIAT

Fischer C, 2008, ENERG EFFIC, V1, P79, DOI 10.1007/s12053-008-9009-7

Goldstein N, 2008, J CONSUMER RES, V35

Haas R, 1998, ENERG BUILDINGS, V27, P195, DOI 10.1016/S0378-7788(97)00034-0

Jain RK, 2012, ENERG BUILDINGS, V48, P8, DOI 10.1016/j.enbuild.2011.12.033

MANKOFF J, 2007, HICSS, P87

City of New York PlaNYC: A Greener Greater New York, 2007, PLANYC GREEN GREAT N

McCalley LT, 2002, J ECON PSYCHOL, V23, P589, DOI 10.1016/S0167-4870(02)00119-8

Neenan B, 2009, RESIDENTIAL ELECT US

Newman MEJ, 2003, SIAM REV, V45, P167, DOI 10.1137/S003614450342480

Nolan JM, 2008, PERS SOC PSYCHOL B, V34, P913, DOI 10.1177/0146167208316691

Parker D., 2008, FSECCR174208 US DEP

Peschiera G, 2010, ENERG BUILDINGS, V42, P1329, DOI 10.1016/j.enbuild.2010.03.001

Petersen E., 2007, INT J SUSTAINABILITY, V8, P16, DOI DOI 10.1108/14676370710717562

Roth K, 2008, ASHRAE J, V50, P136

Staats H, 2000, J APPL BEHAV ANAL, V33, P101, DOI 10.1901/jaba.2000.33-101

Staats H, 2004, ENVIRON BEHAV, V36, P341, DOI 10.1177/0013916503260163

U. S. DOE, 2007, BUILD EN DAT BOOK

Valente TW, 1996, SOC NETWORKS, V18, P69, DOI 10.1016/0378-8733(95)00256-1

NR 23

TC 50

Z9 50

U1 1

U2 34

PU ELSEVIER SCIENCE SA

PI LAUSANNE

PA PO BOX 564, 1001 LAUSANNE, SWITZERLAND

SN 0378-7788

J9 ENERG BUILDINGS

JI Energy Build.

PD JUN

PY 2012

VL 49

BP 584

EP 590

DI 10.1016/j.enbuild.2012.03.011

PG 7

WC Construction & Building Technology; Energy & Fuels; Engineering, Civil

SC Construction & Building Technology; Energy & Fuels; Engineering

GA 966ZI

UT WOS:000305875500068

DA 2018-05-03

ER

PT J

AU Gronhoj, A

Thogersen, J

AF Gronhoj, Alice

Thogersen, John

TI Feedback on household electricity consumption: learning and social  
influence processes

SO INTERNATIONAL JOURNAL OF CONSUMER STUDIES

LA English

DT Article

DE Consumer learning; energy conservation; feedback; sustainability;  
technology

ID ENERGY-CONSERVATION; INFORMATION; INTERVENTION; PERFORMANCE

AB In this paper, we present results from a project aiming to develop a new feedback technology to support sustainable living in private households. Against the backdrop of a review of the relevant literature and based on qualitative family interviews and registration of the households' electricity consumption, we evaluate the effects of giving households detailed feedback about their electricity consumption on a small liquid crystal display (LCD) screen. Twenty Danish households participated in the study over a 5-month period. A new feedback system was developed in a user-involved innovation process. The average electricity saving in participating households is estimated to 8.1%, compared with a 0.8% saving in the control group. The qualitative interviews revealed that the feedback made household electricity consumption more visible and salient, and empowered electricity consumers to take action with respect to lowering their energy consumption. In addition, the feedback stimulated social influences processes related to energy savings between spouses as well as between (teenage) children and their parents.

Notably, families with teenage children appear to be particularly receptive to this type of feedback.

C1 [Gronhoj, Alice; Thogersen, John] Aarhus Univ, Aarhus Sch Business, Dept Mkt & Stat, DK-8210 Aarhus V, Denmark.

RP Gronhoj, A (reprint author), Aarhus Univ, Aarhus Sch Business, Dept Mkt & Stat, DK-8210 Aarhus V, Denmark.

EM alg@asb.dk

OI Thogersen, John/0000-0003-0613-8062; Gronhoj, Alice/0000-0002-3837-2059

CR Abrahamse W, 2005, J ENVIRON PSYCHOL, V25, P273, DOI 10.1016/j.jenvp.2005.08.002

Abrahamse W., 2003, EFFECT TAILORED INFO

Abrahamse W, 2007, J ENVIRON PSYCHOL, V27, P265, DOI 10.1016/j.jenvp.2007.08.002

Bandura A., 1986, SOCIAL FDN THOUGHT A

BECKER LJ, 1978, J APPL PSYCHOL, V63, P428, DOI 10.1037/0021-9010.63.4.428

Birch & Krogboe A/S, 2004, POT EN HUSH ERHV OFF

Brandon G, 1999, J ENVIRON PSYCHOL, V19, P75, DOI 10.1006/jevp.1998.0105

Christiansen E.T., 2009, ELFORBRUG E MAIL SMS

Darby S, 2006, EFFECTIVENESS FEEDBA

Darby S, 2006, ENERG POLICY, V34, P2929, DOI 10.1016/j.enpol.2005.04.013

Darby S, 2010, BUILD RES INF, V38, P442, DOI 10.1080/09613218.2010.492660

Dietz T., 2009, HOUSEHOLD ACTIONS CA

Ehrhardt-Martinez K., 2010, ADV METERING INITIAT

European Commission, 2008, 300 EUR COMM

Fischer C, 2008, ENERG EFFIC, V1, P79, DOI 10.1007/s12053-008-9009-7

Fitzpatrick G, 2009, IEEE PERVAS COMPUT, V8, P37, DOI 10.1109/MPRV.2009.17

Frey BS, 1999, J CONSUMER POLICY, V22, P395

FRITZSCHE DJ, 1981, J MARKETING RES, V18, P227, DOI 10.2307/3150956

Gram-Hanssen K., 2005, HUSHOLDNINGERNES ELF

Gronhoj A., 2007, J CONSUMER BEHAV, V6, P213  
 Hutton B., 1986, J CONSUM RES, V13, P327  
 IEA, 2009, GADG GIG POL EN EFF  
 Kanstrup A.M., 2006, DESIGN INTERAKTIONEN  
 Kluger AN, 1996, PSYCHOL BULL, V119, P254, DOI 10.1037/0033-2909.119.2.254  
 Kvale S., 2009, INTERVIEW  
 McCalley LT, 2006, ENER POLICY, V34, P129, DOI 10.1016/j.enpol.2004.08.024  
 McCalley LT, 2002, J ECON PSYCHOL, V23, P589, DOI 10.1016/S0167-4870(02)00119-8  
 Petersen K.N., 2005, HUSHOLDNINGERS ENER  
 Ropke I, 2010, ENER POLICY, V38, P1764, DOI 10.1016/j.enpol.2009.11.052  
 Schultz PW, 2007, PSYCHOL SCI, V18, P429, DOI 10.1111/j.1467-9280.2007.01917.x  
 Stern PC, 2000, J SOC ISSUES, V56, P407, DOI 10.1111/0022-4537.00175  
 Thaler R. H., 2008, NUDGE IMPROVING DECI  
 Thøgersen J, 2009, J CONSUMER POLICY, V32, P141, DOI DOI 10.1007/S10603-009-9101-1  
 Thøgersen J, 2010, ENER POLICY, V38, P7732, DOI 10.1016/j.enpol.2010.08.025  
 van Dam SS, 2010, BUILD RES INF, V38, P458, DOI 10.1080/09613218.2010.494832  
 VANHOUEWELINGEN JH, 1989, J CONSUM RES, V16, P98, DOI 10.1086/209197  
 WILHITE H, 1995, ENER BUILDINGS, V22, P145, DOI 10.1016/0378-7788(94)00912-4  
 Wood G, 2007, ENER BUILDINGS, V39, P495, DOI 10.1016/j.enbuild.2006.06.009  
 Wood G., 2006, INT J ENER RES, V31, P56

NR 39

TC 49

Z9 49

U1 4

U2 46

PU WILEY-BLACKWELL

PI MALDEN

PA COMMERCE PLACE, 350 MAIN ST, MALDEN 02148, MA USA

SN 1470-6423

J9 INT J CONSUM STUD

JI Int. J. Consum. Stud.

PD MAR

PY 2011

VL 35

IS 2

BP 138

EP 145

DI 10.1111/j.1470-6431.2010.00967.x

PG 8

WC Business

SC Business &amp; Economics

GA 720VP

UT WOS:000287311000005

DA 2018-05-03

ER

PT J

AU Labandeira, X

Labeaga, JM

Rodriguez, M

AF Labandeira, X

Labeaga, JM

Rodriguez, M

TI A residential energy demand system for Spain

SO ENERGY JOURNAL

LA English

DT Article

ID HOUSEHOLD GASOLINE DEMAND; UNITED-STATES; ELECTRICITY DEMAND; CONSUMER

DEMAND; ENGEL CURVES; CONSUMPTION; ELASTICITIES; MICRO; CONSTRAINTS; TECHNOLOGY

AB Sharp price fluctuations and increasing environmental and distributional concerns, among other issues, have led to a renewed academic interest in energy demand. In this paper we estimate, for the first time in Spain, an energy demand system with household microdata. In doing so, we tackle several econometric and data problems that are generally recognized to bias parameter estimates. This is obviously relevant, as obtaining correct price and income responses is essential if they may be used for assessing the economic consequences of hypothetical or real changes. With this objective, we combine data sources for a long time period and choose a demand system with flexible income and price responses. We also estimate the model in different sub-samples to capture varying responses to energy price changes by households living in rural, intermediate and urban areas. This constitutes a first attempt in the literature and it proved to be a very successful choice.

C1 Univ Vigo, Dept Appl Econ, E-36310 Vigo, Spain.

Univ Nacl Educ Distancia, FEDEA, E-28001 Madrid, Spain.

Univ Nacl Educ Distancia, Dept Econ Anal 2, E-28001 Madrid, Spain.

RP Labandeira, X (reprint author), Univ Vigo, Dept Appl Econ, As Lagoas Marcosende S-N, E-36310 Vigo, Spain.

EM xavier@uvigo.es

RI Labandeira, Xavier/K-3638-2014

OI Rodriguez, Miguel/0000-0001-8344-1116

CR BAKER P, 1989, ECON J, V99, P720, DOI 10.2307/2233767

BAKER P, 1990, I FISCAL STUDIES

Banks J, 1997, REV ECON STAT, V79, P527, DOI 10.1162/003465397557015

Blundell R, 2000, ECONOMETRICA, V68, P53, DOI 10.1111/1468-0262.00093

Blundell R, 1999, J APPL ECONOMET, V14, P209

BLUNDELL RW, 1993, AM ECON REV, V70, P312

BROWNING M, 1991, ECONOMETRICA, V59, P925, DOI 10.2307/2938167

Considine TJ, 2000, RESOUR ENERGY ECON, V22, P295, DOI 10.1016/S0928-7655(00)00027-0

Deaton A.S., 1980, AM ECON REV, V68, P570

DUBIN JA, 1984, ECONOMETRICA, V52, P345, DOI 10.2307/1911493

Filippini M, 2004, ENER POLICY, V32, P429, DOI 10.1016/S0301-4215(02)00314-2

FILIPPINI M, 1995, RESOUR ENERGY ECON, V17, P281, DOI 10.1016/0928-7655(95)00005-1

Garcia-Cerrutti LM, 2000, RESOUR ENERGY ECON, V22, P355, DOI 10.1016/S0928-7655(00)00028-2

Haas R, 1998, ENER ECON, V20, P421, DOI 10.1016/S0140-9883(98)00003-6

Halvorsen B, 2001, RESOUR ENERGY ECON, V23, P1, DOI 10.1016/S0928-7655(00)00035-X

HAUSMAN JA, 1995, J ECONOMETRICS, V65, P205, DOI 10.1016/0304-4076(94)01602-V

Holtedahl P, 2004, ENER ECON, V26, P201, DOI 10.1016/j.eneco.2003.11.001

Hondroyannis G, 2004, ENER ECON, V26, P319, DOI 10.1016/j.eneco.2004.04.001

\*INT EN AG, 2003, EN PRIC TAX

Kamerschen DR, 2004, ENER ECON, V26, P87, DOI 10.1016/S0140-9883(03)00033-1

Kayser HA, 2000, ENER ECON, V22, P331, DOI 10.1016/S0140-9883(99)00043-2

Keen M., 1986, J APPLIED ECONOMETRI, V1, P277

Labandeira X., 1999, FISCAL STUDIES, V20, P303

LABANDEIRA X, 2006, 200602 FEDEA

LABANDEIRA X, 2004, 161 FOND EN ENR MATT

Labeaga JM, 1997, APPL ECON, V29, P795, DOI 10.1080/000368497326714

Labeaga J. M., 1994, INVEST ECON-SPAIN, VXXVIII, P289

LABEAGA JM, 2006, IN PRESS SOME PRACTI

LABEAGA JM, 2001, 02 UNED

Larsen BM, 2004, ENER ECON, V26, P179, DOI 10.1016/j.eneco.2004.02.001

LEE LF, 1986, ECONOMETRICA, V54, P1237, DOI 10.2307/1912330

Leth-Petersen S, 2002, ENERGY J, V23, P57

Lewbel A, 2003, J APPL ECONOM, V18, P127, DOI 10.1002/jae.677

LISSYOTOU P, 1999, ECON LETT, V64, P61

Madlener R, 1996, J ENERGY LIT, VII, P3

MICKLEWRIGHT J, 1989, ENER POLICY, V6, P264

Narayan PK, 2005, ENER POLICY, V33, P467, DOI 10.1016/j.enpol.2003.08.011

Nesbakken R, 2001, SCAND J ECON, V103, P165, DOI 10.1111/1467-9442.00236

NICHELE V, 1995, J PUBLIC ECON, V56, P225, DOI 10.1016/0047-2727(94)01425-N  
Nicol CJ, 2001, CAN J ECON, V34, P259, DOI 10.1111/0008-4085.00074  
Nicol CJ, 2003, ENERG ECON, V25, P201, DOI 10.1016/S0140-9883(03)00002-1  
OILGAS, 2002, ENCICLOPEDIA  
Oladosu G, 2003, ENERGY J, V24, P1  
PASHARDES P, 1995, J PUBLIC ECON, V58, P143, DOI 10.1016/0047-2727(94)01465-Z  
Popp DC, 2001, RESOUR ENERGY ECON, V23, P215, DOI 10.1016/S0928-7655(00)00045-2  
Puller SL, 1999, ENERG ECON, V21, P37, DOI 10.1016/S0140-9883(98)00006-1  
Schmalensee R, 1999, ECONOMETRICA, V67, P645, DOI 10.1111/1468-0262.00041  
Tiezzi S, 2005, ENERG POLICY, V33, P1597, DOI 10.1016/j.enpol.2004.01.016  
\*U POL MADR, 2000, EST SECT TRANSP ESP  
Vaage K, 2000, ENERG ECON, V22, P649, DOI 10.1016/S0140-9883(00)00053-0  
WALES TJ, 1983, J ECONOMETRICS, V21, P263, DOI 10.1016/0304-4076(83)90046-5  
Yatchew A, 2001, ECONOMETRICA, V69, P1697, DOI 10.1111/1468-0262.00264  
NR 52  
TC 48  
Z9 48  
U1 0  
U2 9  
PU INT ASSOC ENERGY ECONOMICS  
PI CLEVELAND  
PA 28790 CHAGRIN BLVD, STE 210, CLEVELAND, OH 44122 USA  
SN 0195-6574  
J9 ENERG J  
JI Energy J.  
PY 2006  
VL 27  
IS 2  
BP 87  
EP 111  
PG 25  
WC Economics; Energy & Fuels; Environmental Studies  
SC Business & Economics; Energy & Fuels; Environmental Sciences & Ecology  
GA 027JO  
UT WOS:000236411900006  
DA 2018-05-03  
ER  
FN Clarivate Analytics Web of Science  
VR 1.0  
PT J  
AU Zhou, YY  
Clarke, L  
Eom, J  
Kyle, P  
Patel, P  
Kim, SH  
Dirks, J  
Jensen, E  
Liu, Y  
Rice, J  
Schmidt, L  
Seiple, T  
AF Zhou, Yuyu  
Clarke, Leon  
Eom, Jiyong  
Kyle, Page  
Patel, Pralit  
Kim, Son H.



Dirks, James  
 Jensen, Erik  
 Liu, Ying  
 Rice, Jennie  
 Schmidt, Laurel  
 Seiple, Timothy

TI Modeling the effect of climate change on U.S. state-level buildings energy demands in an integrated assessment framework

SO APPLIED ENERGY

LA English

DT Article

DE Buildings energy demand; Electricity use; Climate change; Integrated assessment model; Sensitivity

ID RESIDENTIAL SECTOR; CONSUMPTION; CHINA; TRANSPORTATION; TECHNOLOGIES; WORLD; US

AB Objective: Because long-term socioeconomic transformation and energy service expansion show large spatial heterogeneity, advanced understanding of climate change impact on buildings energy use at the sub-national level will offer useful insights into climate policy and regional energy system planning.

Methods: In this study, we present a detailed buildings energy model with U.S. state-level representation, nested in an integrated assessment framework of the Global Change Assessment Model (GCAM). We project state-level buildings energy demand and its spatial pattern through the end of the century, considering the impact of climate change based on the estimates of heating and cooling degree days derived from downscaled USGS CASCade temperature data.

Results: The results indicate that climate change has a large impact on heating and cooling buildings energy and fuel use at the state level and that the 48 U.S. contiguous states exhibit a large spatial heterogeneity (ranges from -10% to +10% for total, -10% to +20% for electricity use and -20% to -5% for oil and gas use in the A2 scenario). Sensitivity analysis explores the potential implications of multiple driving forces, including climate action that would both change the price of energy and reduce climate change, the choice of climate models, and population and GDP growth. In addition, the 50-state building model is compared to a comparable version of the model which represents the entire United States as one region.

Conclusions: The study clearly demonstrates the spatially varying nature of fuel consumption changes that might occur from a changing climate. Although the study illustrates the importance of incorporating climate change into infrastructure-planning exercises, it also demonstrates that uncertainties about underlying drivers still must weigh heavily on these planning decisions. Finally, the study demonstrates that the 50-state building model provides both insights at the regional level and potentially better national-level estimates.

Practice implication: The findings from this study will help the climate-based policy decision and energy system, especially utility planning related to the buildings sector at the U.S. state and regional level facing the potential climate change. © 2013 Elsevier Ltd. All rights reserved.

C1 [Zhou, Yuyu; Clarke, Leon; Kyle, Page; Patel, Pralit; Kim, Son H.] Pacific NW Natl Lab, Joint Global Change Res Inst, College Pk, MD 20740 USA.

[Eom, Jiyong] Sogang Univ, Grad Sch Management Technol, Seoul, South Korea.

[Dirks, James; Jensen, Erik; Liu, Ying; Rice, Jennie; Schmidt, Laurel; Seiple, Timothy] Pacific NW Natl Lab, Richland, WA 99352 USA.

RP Zhou, YY (reprint author), Pacific NW Natl Lab, Joint Global Change Res Inst, College Pk, MD 20740 USA.

EM yuyu.zhou@pnnl.gov

RI Eom, Jiyong/A-1161-2014

OI Eom, Jiyong/0000-0002-8092-5921

FU DOE SC-IARP; U.S. Department of Energy [DE-AC05-76RL01830]

FX The research described in this paper is part of the Platform for Regional Integrated Modeling and Analysis (PRIMA) Initiative at Pacific Northwest National Laboratory (PNNL). It was conducted under the Laboratory Directed Research and Development Program at PNNL, a multiprogram national laboratory operated by Battelle for the U.S. Department of Energy. The authors wish to express appreciation to the Integrated Assessment Research Program in the Office of Science of the U.S. Department of Energy (DOE SC-IARP). This research also used

Evergreen computing resources at the PNNL's Joint Global Change Research Institute at the University of Maryland in College Park, which is supported by DOE SC-IARP. PNNL is operated by Battelle for the U.S. Department of Energy under contract DE-AC05-76RL01830. The authors would like to thank Jennie Rice, Laurel Schmidt, Maoyi Huang, Ying Liu, and Erik Jensen for providing the data used in this project. The views and opinions expressed in this paper are those of the authors alone.

- CR Amato AD, 2005, CLIMATIC CHANGE, V71, P175, DOI 10.1007/s10584-005-5931-2  
 Baumert K, 2003, HEATING COOLING DEGR  
 Bureau of Economic Analysis (BEA), 2012, REG EC ACC  
 Belzer DB, 2007, EST US COMM BUILD EL  
 Brenkert A, 2003, MODEL DOCUMENTATION  
 Chen SQ, 2008, ENERGBUILDINGS, V40, P654, DOI 10.1016/j.enbuild.2007.04.022  
 Cheng V, 2011, ENVIRON MODEL SOFTW, V26, P1186, DOI 10.1016/j.envsoft.2011.04.005  
 Christensen C., 2005, P ISES 2005 SOL WORL  
 CLARKE JF, 1993, ENERGBUILDINGS, V15, P123, DOI 10.1016/0140-9883(93)90031-L  
 Clarke L., 2008, PNNL18075  
 David BB, 1996, ENERGBUILDINGS, V18, P177  
 Day T., 2006, DEGREE DAYS THEORY A  
 Edmonds J, 2004, ENERGBUILDINGS, V26, P517, DOI 10.1016/j.eneco.2004.04.025  
 EIA, 2008, COMM BUILD EN CONS S  
 EIA [Energy Information Administration], 2007, ANN EN OUTL 2007 PRO  
 EIA, 2012, RES EN CONS SURV  
 EIA, 2012, STAT EN DAT SYST CON  
 Eom J, 2012, ENERGY, V46, P405, DOI 10.1016/j.energy.2012.08.009  
 Hadley SW, 2006, GEOPHYS RES LETT, V33, DOI 10.1029/2006GL026652  
 Huang Y. J., 2000, LBNL46303  
 IEA, 2007, EN BAL OECD COUNTR 1  
 Isaac M, 2009, ENERGPOLICY, V37, P507, DOI 10.1016/j.enpol.2008.09.051  
 Kavacic M, 2010, BUILD ENVIRON, V45, P1683, DOI 10.1016/j.buildenv.2010.01.021  
 Kim SH, 2006, ENERGY J, P63  
 Kyle P, 2010, ENERGY J, V31, P131  
 Lu N, 2010, IEEE T POWER SYST, V25, P480, DOI 10.1109/TPWRS.2009.2030387  
 Mansur E. T., 2005, ES43 YAL SOM  
 NCI, 2004, EIA TECHN FOR UPD RE  
 Rosenquist G, 2004, ENERGPOLICY, V34, P3257  
 ROSENTHAL DH, 1995, ENERGY J, V16, P77  
 Scott MJ, 2008, MITIG ADAPT STRAT GL, V13, P307, DOI 10.1007/s11027-007-9115-4  
 Scott MJ, 2007, EFFECTS CLIMATE CHAN, P7  
 Seljom P, 2011, ENERGPOLICY, V39, P7310, DOI 10.1016/j.enpol.2011.08.054  
 Sezgen O, 1995, TECHNOLOGY DATA CHAR  
 Swan LG, 2009, RENEW SUST ENERGBUILDINGS, V13, P1819, DOI 10.1016/j.rser.2008.09.033  
 United Nations Population Division, 2009, WORLD POP PROSP 2008  
 United States Census Bureau, 2005, 2005 INT STAT POP PR  
 U. S. Census Bureau, 2008, 2008 NAT POP PROJ  
 van Ruijven BJ, 2011, ENERGPOLICY, V39, P7747, DOI 10.1016/j.enpol.2011.09.021  
 Wan K. K. W., 2011, APPL ENERGBUILDINGS, V97, P274  
 Wilbanks TJ, 2007, EFF CLIM CHANG EN PR  
 Xu P., 2009, EFFECTS GLOBAL CLIMA  
 Zhou YY, 2013, CLIMATIC CHANGE, V119, P979, DOI 10.1007/s10584-013-0772-x
- NR 43  
 TC 46  
 Z9 46  
 U1 2  
 U2 27  
 PU ELSEVIER SCI LTD  
 PI OXFORD  
 PA THE BOULEVARD, LANGFORD LANE, KIDLINGTON, OXFORD OX5 1GB, OXON, ENGLAND

SN 0306-2619  
 EI 1872-9118  
 J9 APPL ENERG  
 JI Appl. Energy  
 PD JAN  
 PY 2014  
 VL 113  
 SI SI  
 BP 1077  
 EP 1088  
 DI 10.1016/j.apenergy.2013.08.034  
 PG 12  
 WC Energy & Fuels; Engineering, Chemical  
 SC Energy & Fuels; Engineering  
 GA 293DV  
 UT WOS:000329952500103  
 DA 2018-05-03  
 ER

PT J

AU Freire-Gonzalez, J

AF Freire-Gonzalez, Jaume

TI Methods to empirically estimate direct and indirect rebound effect of energy-saving technological changes in households

SO ECOLOGICAL MODELLING

LA English

DT Article

DE Rebound effect; Energy efficiency; Energy policy; Sustainable consumption; Input-output; Re-spending

ID CARBON EMISSIONS; CLIMATE-CHANGE; CONSUMPTION; EFFICIENCY; PRICE; POLICIES; DEMAND; TIME; REQUIREMENTS; PERSPECTIVE

AB Energy efficiency policies have a special importance within carbon emission reduction policies to mitigate the climate change effects. However, potential reductions of energy consumption and, consequently, its resulting emissions, can be offset through the so called "rebound effect". The concept of "rebound effect" refers to a set of mechanisms whereby the improvement of efficiency reduces the cost of the energy service and this results in the household energy consumption rising and totally or partially negating the reduction achieved by the energy efficiency improvement. This paper provides a methodology to estimate the static direct plus indirect rebound effect of energy efficiency improvements in the use of energy in households. It is based on the combination of econometric estimations of energy demand functions, re-spending modelling and generalised input-output of energy modelling. It also provides estimations for Catalonia. (C) 2011 Elsevier B.V. All rights reserved.

C1 [Freire-Gonzalez, Jaume] ENT Environm & Management, Barcelona 08800, Spain.

[Freire-Gonzalez, Jaume] Autonomous Univ Barcelona, Dept Appl Econ, Barcelona 08193, Spain.

RP Freire-Gonzalez, J (reprint author), ENT Environm & Management, St Joan 39,1, Barcelona 08800, Spain.

EM jaumefreire@hotmail.com

RI feng, tingting/A-9545-2012

OI Freire-Gonzalez, Jaume/0000-0002-5922-3255

FU ENT Environment and Management; Comissionat per a Universitats i Recerca del Departament d'Innovacio, Universitats i Empresa (Generalitat de Catalunya)

FX I would like to acknowledge ENT Environment and Management and Comissionat per a Universitats i Recerca del Departament d'Innovacio, Universitats i Empresa (Generalitat de Catalunya) for funding this research. I would also like to thank Dr. Ignasi Puig Ventosa (ENT) and Matthew Ashley (Plymouth University) for their helpful comments.

CR Alcantara V., 1995, THESIS U BARCELONA

Alfredsson EC, 2004, ENERGY, V29, P513, DOI 10.1016/j.energy.2003.10.013

Allan G, 2006, MACROECONOMIC REBOUN

- Barker T, 2006, MACROECONOMIC REBOUN
- Barker T, 2007, ENERG ECON, V29, P760, DOI 10.1016/j.eneco.2006.12.008
- BECKER GS, 1965, ECON J, V75, P493, DOI 10.2307/2228949
- Berkhout PHG, 2000, ENERG POLICY, V28, P425, DOI 10.1016/S0301-4215(00)00022-7
- Binswanger M, 2001, ECOL ECON, V36, P119, DOI 10.1016/S0921-8009(00)00214-7
- Brannlund R, 2007, ENERG ECON, V29, P1, DOI 10.1016/j.eneco.2005.09.003
- BROOKES LG, 1978, ENERG POLICY, V6, P94, DOI 10.1016/0301-4215(78)90031-9
- BULLARD CW, 1975, ENERG POLICY, V3, P268, DOI 10.1016/0301-4215(75)90035-X
- Carlsson-Kanyama A, 2005, J IND ECOL, V9, P221, DOI 10.1162/1088198054084590
- CASLER S, 1984, RESOUR ENER, V6, P187, DOI 10.1016/0165-0572(84)90016-1
- Chalkley A.-M., 2001, J SUSTAINABLE PRODUC, V1, P163
- CHAPMAN PF, 1974, ENERG POLICY, V2, P91, DOI 10.1016/0301-4215(74)90002-0
- Cohen C, 2005, ENERG POLICY, V33, P555, DOI 10.1016/j.enpol.2003.08.021
- Davis L. W., 2007, DURABLE GOODS RESIDE
- DEATON A, 1980, AM ECON REV, V70, P312
- Dimitropoulos J., 2006, P 29 IAEE INT C POTS
- Dimitropoulos J, 2007, ENERG POLICY, V35, P6354, DOI 10.1016/j.enpol.2007.07.028
- Druckman A., 2010, WORKING PAPER SERIES
- DUBIN JA, 1986, RAND J ECON, V17, P310, DOI 10.2307/2555713
- Dufournaud C.M., 1994, RESOUR ENERGY ECON, V16, P69
- Fouquet R, 2006, ENERJ, V27, P139
- Freire-Gonzalez J, 2011, P ADV EN STUD 2010 C
- Freire-Gonzalez J. F., 2010, ENERG POLICY, V38, P2309
- Frondel M, 2004, ENERG POLICY, V32, P989, DOI 10.1016/S0301-4215(03)00043-0
- Frondel M, 2007, RWI DISCUSSION PAPER
- Glomsrod S, 2005, ENERG POLICY, V33, P525, DOI 10.1016/j.enpol.2003.08.019
- Greene D.L., 1998, ESTIMATING REBOUND E
- Greene D. L., 1999, ECONOMETRIC ANAL ELA
- Greening LA, 2000, ENERG POLICY, V28, P389
- Grepperud S, 2004, ENERG ECON, V26, P261, DOI 10.1016/j.eneco.2003.11.003
- Guertin C., 2003, DETERMINING DEMAND E
- Haas R, 2000, ENERG POLICY, V28, P403, DOI 10.1016/S0301-4215(00)00023-9
- Hanley ND, 2006, RENEW ENER, V31, P161, DOI 10.1016/j.renene.2005.08.023
- Haughton J, 1996, ENERGY J, V17, P103
- HAUSMAN JA, 1979, BELL J ECON, V10, P33, DOI 10.2307/3003318
- Herendeen R., 1976, ENERGY, P165
- Hirst E, 1987, ENERGY SYST POLICY, V10, P1
- Institut d'Estadistica de Catalunya (Idescat), 2007, TAUL INP OUTP CAT 20
- Jalas M, 2002, ECOL ECON, V41, P109, DOI 10.1016/S0921-8009(02)00018-6
- Junankar S, 2007, MDM E3 SHORT TECHNIC
- Khazzoom J. D., 1986, ECONOMETRIC MODEL IN
- Khazzoom J. D, 1980, ENERGY J, V1, P21
- Kok R, 2006, ENERG POLICY, V34, P2744, DOI 10.1016/j.enpol.2005.04.006
- Lenzen M, 1998, ENERGY, V23, P497, DOI 10.1016/S0360-5442(98)00020-6
- LEONTIEF W, 1970, REV ECON STAT, V52, P262, DOI 10.2307/1926294
- MILLER EM, 1986, SOUTHERN ECON J, V52, P745, DOI 10.2307/1059271
- Miller R. E., 2009, INPUT OUTPUT ANAL FD
- Nesbakken R, 2001, SCAND J ECON, V103, P165, DOI 10.1111/1467-9442.00236
- Ouyang J., 2010, ENERGY IN PRESS, DOI [10.1016/j.energy.2010.07.038, DOI 10.1016/J.ENERGY.2010.07.038]
- Polimeni J. M., 2008, JEVONS PARADOX MYTH
- Proops JLR, 1988, INPUT OUTPUT ANAL CU
- Ramos-Martin J, 2003, ECOL ECON, V46, P387, DOI 10.1016/S0921-8009(03)00191-5
- Richmond AK, 2006, ECOL ECON, V56, P176, DOI 10.1016/j.ecolecon.2005.01.011
- Sanne C, 2000, ENERG POLICY, V28, P487, DOI 10.1016/S0301-4215(00)00031-8
- Sartori I, 2007, ENERG BUILDINGS, V39, P249, DOI 10.1016/j.enbuild.2006.07.001
- Saunders H.D., 2007, FUEL CONSERVING USIN
- Saunders H. D., 1992, ENERGY J, V13, P131, DOI DOI 10.5547/ISSN0195-6574-EJ-V0113-N04-7

Schipper L, 2000, ENER POLICY, V28, P367, DOI 10.1016/S0301-4215(00)00018-5  
 SCHWARZ PM, 1995, ENERGY J, V16, P41  
 Semboja H.H.H, 1994, ENER POLICY, P217  
 Small K. A., 2005, STUDY EVALUATE EFFEC  
 Sorrell S., 2007, REBOUND EFFECT ASSES  
 Sorrell S, 2009, ENER POLICY, V37, P1356, DOI 10.1016/j.enpol.2008.11.026  
 Stern DI, 2000, ENER ECON, V22, P267, DOI 10.1016/S0140-9883(99)00028-6  
 Stern D.I, 2004, 0403 RENNSS POL I  
 Takase K, 2005, J IND ECOL, V9, P201, DOI 10.1162/1088198054084653  
 Vikstrom P, 2004, INPUT OUTPUT GEN EQU  
 Washida T., 2004, INT WORKSH SUST CONS  
 West SE, 2004, J PUBLIC ECON, V88, P735, DOI 10.1016/S0047-2727(02)00186-X

NR 72

TC 46

Z9 46

U1 1

U2 16

PU ELSEVIER SCIENCE BV

PI AMSTERDAM

PA PO BOX 211, 1000 AE AMSTERDAM, NETHERLANDS

SN 0304-3800

J9 ECOL MODEL

JI Ecol. Model.

PD DEC 24

PY 2011

VL 223

IS 1

SI SI

BP 32

EP 40

DI 10.1016/j.ecolmodel.2011.09.001

PG 9

WC Ecology

SC Environmental Sciences &amp; Ecology

GA 871FX

UT WOS:000298724400005

DA 2018-05-03

ER

PT J

AU Cayla, JM

Maizi, N

Marchand, C

AF Cayla, Jean-Michel

Maizi, Nadia

Marchand, Christophe

TI The role of income in energy consumption behaviour: Evidence from French households data

SO ENERGY POLICY

LA English

DT Article

DE Household energy consumption; Investment choice; Energy behaviour

ID DISCOUNT RATES; CONSERVATION; INVESTMENT; EFFICIENCY; DIFFUSION; PURCHASE

AB The main purpose of this paper is to characterise quantitatively the impact of income on household energy consumption in the residential and transport sectors. Starting from the data collected in a paper survey, we analyse the extent of the constraint experienced by households in terms of equipment purchasing behaviour and daily energy consumption. This analysis shows that the least well-off

households are particularly constrained since the share of their budget represented by these energy services is very large (15-25%), and this corresponds to a level of energy service well below that of the better-off households. The case of space-heating shows a factor of 2 in terms of level of comfort achieved between the extreme 10-percentiles. These households also face a strong capital constraint for equipment purchases. This leads either to a large increase in the required rate of return or to a reduction in the proportion of households that are prepared to replace their equipment earlier. The least well-off households are thus doubly constrained, since it is more difficult for them to invest. In our opinion, it is crucial to take into account this observation in the context of political measures aimed at reducing households'CO(2) emissions. (C) 2011 Elsevier Ltd. All rights reserved.

C1 [Cayla, Jean-Michel; Maizi, Nadia] Mines ParisTech Ctr Math Appliquees, CMA, Ctr Appl Math, Sophia Antipolis, France.

[Cayla, Jean-Michel; Marchand, Christophe] Elect France EDF R&D, Moret Sur Loing, France.

RP Cayla, JM (reprint author), Mines ParisTech Ctr Math Appliquees, CMA, Ctr Appl Math, Sophia Antipolis, France.

EM jeanmichel.cayla@gmail.com

RI feng, tingting/A-9545-2012

OI Maizi, Nadia/0000-0001-5003-5103

CR Abrahamse W., 2007, THESIS GRONINGEN U

AJZEN I, 1991, ORGAN BEHAV HUM DEC, V50, P179, DOI 10.1016/0749-5978(91)90020-T

Bamberg S, 2003, J ENVIRON PSYCHOL, V23, P21, DOI 10.1016/S0272-4944(02)00078-6

Bartiaux F., 2006, SOCIOTECHNICAL FACTO

Bigot R., 2007, CAHIER RECHERCHES

BLACK JS, 1985, J APPL PSYCHOL, V70, P3, DOI 10.1037//0021-9010.70.1.3

Cayla J.M., 2010, ACEEE SUMM STUD P EN

CEREN, 2007, EST CONS GAZ US EAU

Clochard R., 2008, AUTOMOBILITES ALTERM

Corraliza JA, 2000, ENVIRON BEHAV, V32, P832, DOI 10.1177/00139160021972829

Desjeux D, 1996, ANTHR ELECT

DILLMAN DA, 1983, J ECON PSYCHOL, V3, P299, DOI 10.1016/0167-4870(83)90008-9

Douglas Mary, 1979, WORLD GOODS ANTHR CO

DREYFUS MK, 1995, J LAW ECON, V38, P79, DOI 10.1086/467326

DUBIN JA, 1984, ECONOMETRICA, V52, P345, DOI 10.2307/1911493

Goett A., 1982, EA2512 EL POW RES I

GREENE DL, 1983, TRANSPORT RES B-METH, V17, P491, DOI 10.1016/0191-2615(83)90034-6

Greene D.L., 2004, FUTURE POTENTIAL HYB

Greening LA, 2000, ENERG POLICY, V28, P389

Haas R, 2000, ENERG POLICY, V28, P403, DOI 10.1016/S0301-4215(00)00023-9

HASSETT KA, 1993, ENERG POLICY, V21, P710, DOI 10.1016/0301-4215(93)90294-P

HAUSMAN JA, 1979, BELL J ECON, V10, P33, DOI 10.2307/3003318

HOUSTON DA, 1983, J CONSUM RES, V10, P236, DOI 10.1086/208962

INSEE, 2008, INSEE PREM NO 1176

JAFFE AB, 1994, RESOUR ENERGY ECON, V16, P91, DOI 10.1016/0928-7655(94)90001-9

Kahneman D, 2003, AM ECON REV, V93, P162, DOI 10.1257/000282803321946985

Mahapatra K, 2008, ENERG POLICY, V36, P577, DOI 10.1016/j.enpol.2007.10.006

McKenzie-Mohr D, 2000, J SOC ISSUES, V56, P543, DOI 10.1111/0022-4537.00183

Ministere de l'Emploi de la Cohesion sociale et du Logement, 2006, NORSOCU0610563A MIN

Moussaoui I., 2005, MAITRISER SON CONFOR

Moussaoui I., 2006, MAITRISE ENERGIE COM

PINDYCK RS, 1991, J ECON LIT, V29, P1110

Sadler M., 2003, THESIS S FRASER U

Schwartz S., 1992, ADV EXPT SOCIAL PSYC, V10, P221

Shove E, 2003, COMFORT CLEANLINESS

SONDEREGGER RC, 1978, ENERG BUILDINGS, V1, P313, DOI 10.1016/0378-7788(78)90011-7

Stern P. C., 1999, HUMAN ECOLOGY REV, V6, P81, DOI DOI 10.2307/2083693

TRAIN K, 1985, ENERGY, V10, P1243, DOI 10.1016/0360-5442(85)90135-5

VERHALLEN TMM, 1981, J CONSUM RES, V8, P253, DOI 10.1086/208862

Wach M., 2003, STRUCTURE VALEURS ES

Winer R., 1997, MARKET SCI, V8, P109

NR 41  
TC 46  
Z9 49  
U1 0  
U2 7  
PU ELSEVIER SCI LTD  
PI OXFORD  
PA THE BOULEVARD, LANGFORD LANE, KIDLINGTON, OXFORD OX5 1GB, OXON, ENGLAND  
SN 0301-4215  
J9 ENERG POLICY  
JI Energy Policy  
PD DEC  
PY 2011  
VL 39  
IS 12  
BP 7874  
EP 7883  
DI 10.1016/j.enpol.2011.09.036  
PG 10  
WC Economics; Energy & Fuels; Environmental Sciences; Environmental Studies  
SC Business & Economics; Energy & Fuels; Environmental Sciences & Ecology  
GA 866EN  
UT WOS:000298363400039  
DA 2018-05-03  
ER

PT J  
AU Mastrucci, A  
    Baume, O  
    Stazi, F  
    Leopold, U  
AF Mastrucci, Alessio  
    Baume, Olivier  
    Stazi, Francesca  
    Leopold, Ulrich

TI Estimating energy savings for the residential building stock of an  
entire city: A GIS-based statistical downscaling approach applied to  
Rotterdam

SO ENERGY AND BUILDINGS

LA English

DT Article

DE Sustainable urban planning; Building stock modelling; Multiple linear  
regression; Energy savings potential; Downscaling

ID MODELING TECHNIQUES; URBAN SCALE; END-USE; CONSUMPTION; SECTOR

AB Energy retrofit of buildings represents an important sector for mobilizing investments to address carbon mitigation of cities. The identification of the actual energy consumption profile of large building stocks is a necessary step to evaluate the impact of retrofit measures, e.g. energy savings, at city scale.

The present study introduces a bottom-up statistical methodology based on a Geographical Information System (GIS) to estimate the energy consumption of residential stocks across an entire city.

The adoption of a multiple linear regression model allows the downscaling of measured natural gas and electricity consumption from the aggregated post-code level to single dwellings, based on several descriptors, such as dwelling type, period of construction, floor surface and number of occupants. The energy consumption is apportioned to different end-uses and corrected for weather, then the energy savings potential is estimated by accounting for the implementation of typical refurbishment measures. Results are finally aggregated across the whole city for evidence-based decision support in sustainable urban planning.

- The study provided relevant results to prioritize the implementation of energy retrofit measures for the residential stock of Rotterdam city, consisting of about 300,000 dwellings. The methodology can be further applied to other contexts due to its generic nature. (C) 2014 Elsevier B.V. All rights reserved.
- C1 [Mastrucci, Alessio; Baume, Olivier; Leopold, Ulrich] Resource Ctr Environm Technol, Publ Res Ctr Henri Tudor, L-4362 Esch Sur Alzette, Luxembourg.  
[Mastrucci, Alessio; Stazi, Francesca] Univ Politecn Marche, Dipartimento Ingn Civile Edile & Architettura, I-60131 Ancona, Italy.
- RP Mastrucci, A (reprint author), Resource Ctr Environm Technol, Publ Res Ctr Henri Tudor, 6A,Ave Hauts Fourneaux, L-4362 Esch Sur Alzette, Luxembourg.  
EM alessiomastrucci@gmail.com; ulrich.leopold@tudor.lu
- RI Leopold, Ulrich/F-9714-2010
- OI Leopold, Ulrich/0000-0003-0059-6134
- FU Public Research Centre Henri Tudor, Luxembourg; EU INTERREG IVB NWE [165F]; Universita Politecnica delle Marche, Italy [FNR/12/AM2c/11]; MUSIC project; Fonds National de la Recherche Luxembourg (FNR)
- FX This work has been funded by: the Public Research Centre Henri Tudor, Luxembourg, by the EU INTERREG IVB NWE, Project 165F; the MUSIC project; the Fonds National de la Recherche Luxembourg (FNR) by the measure FNR/12/AM2c/11 for the mobility of Alessio Mastrucci from Universita Politecnica delle Marche, Italy, to Public Research Centre Henri Tudor, Luxembourg.
- CR Agentschap NL, 2011, VOORBEELDWONINGEN 20
- Baker KJ, 2008, APPL ENERG, V85, P475, DOI 10.1016/j.apenergy.2007.09.004
- Bentzen J, 2001, ENERGY, V26, P45, DOI 10.1016/S0360-5442(00)00052-9
- Beusker E, 2012, BUILD ENVIRON, V49, P324, DOI 10.1016/j.buildenv.2011.08.006
- Caputo P, 2013, ENERG POLICY, V55, P261, DOI 10.1016/j.enpol.2012.12.006
- Christensen R., 2011, THEORY LINEAR MODELS
- De Sousa L, 2012, P INT ENV MOD SOFTW
- Efron B., 1993, INTRO BOOTSTRAP
- Fracastoro GV, 2011, ENERG BUILDINGS, V43, P844, DOI 10.1016/j.enbuild.2010.12.004
- Gikas A., 2006, STAT FOCUS ENV ENERG, P4
- Griffin H., 2000, COUNTRY PICTURES ENE
- Heiple S, 2008, ENERG BUILDINGS, V40, P1426, DOI 10.1016/j.enbuild.2008.01.005
- HIRST E, 1978, SIMULATION, V30, P69, DOI 10.1177/003754977803000301
- Howard B, 2012, ENERG BUILDINGS, V45, P141, DOI 10.1016/j.enbuild.2011.10.061
- Kavgic M, 2010, BUILD ENVIRON, V45, P1683, DOI 10.1016/j.buildenv.2010.01.021
- Mata E, 2013, ENERG BUILDINGS, V56, P100, DOI 10.1016/j.enbuild.2012.09.037
- The MUSIC Project, 2013, MIT CO2 EM URB AR SO
- Normalisatie-instituut N., 2011, 71202011 NEN
- R Development Core Team, 2012, R LANG ENV STAT COMP
- SAHA GP, 1980, ENERGY, V5, P167, DOI 10.1016/0360-5442(80)90005-5
- Santin G.O., 2009, ENERG BUILDINGS, V41, P1223
- Singh MK, 2013, ENERG POLICY, V62, P729, DOI 10.1016/j.enpol.2013.07.138
- Strzalka A, 2011, HVAC&R RES, V17, P526, DOI 10.1080/10789669.2011.582920
- Swan LG, 2009, RENEW SUST ENERG REV, V13, P1819, DOI 10.1016/j.rser.2008.09.033
- Theodoridou I, 2012, RENEW SUST ENERG REV, V16, P6239, DOI 10.1016/j.rser.2012.03.075
- Tian W, 2012, ENERG BUILDINGS, V54, P1, DOI 10.1016/j.enbuild.2012.06.031
- Tso GKF, 2007, ENERGY, V32, P1761, DOI 10.1016/j.energy.2006.11.010
- [Anonymous], 2012, FACTS FIGURES ROTTER
- NR 28
- TC 45
- Z9 45
- U1 2
- U2 24
- PU ELSEVIER SCIENCE SA
- PI LAUSANNE
- PA PO BOX 564, 1001 LAUSANNE, SWITZERLAND
- SN 0378-7788



EI 1872-6178

J9 ENERGBUILDINGS

J1 Energy Build.

PD JUN

PY 2014

VL 75

BP 358

EP 367

DI 10.1016/j.enbuild.2014.02.032

PG 10

WC Construction & Building Technology; Energy & Fuels; Engineering, Civil

SC Construction & Building Technology; Energy & Fuels; Engineering

GA AI6UT

UT WOS:000337013200036

DA 2018-05-03

ER

PT J

AU Wang, ZH

Lu, ML

Wang, JC

AF Wang, Zhaohua

Lu, Milin

Wang, Jian-Cai

TI Direct rebound effect on urban residential electricity use: An empirical study in China

SO RENEWABLE & SUSTAINABLE ENERGY REVIEWS

LA English

DT Review

DE Rebound effect; Energy efficiency; Energy service; Energy consumption

ID ENERGY EFFICIENCY; CONSUMPTION; PANEL; INDICATORS; COUNTRY; TESTS; OECD

AB Though improving energy efficiency is an important approach to decrease the energy consumption, the rebound effect caused by technology progress negatively affects the effectiveness of energy efficiency policies. This paper empirically investigates direct rebound effect of urban residential electricity use in China. Using China's 30 provincial government panel data from 1996 to 2010, we build a co-integration equation and a panel error correction model to analyze the direct rebound effect. The results indicate that an obvious rebound effect in the Chinese urban residential electricity consumption does exist. Specifically, the long-term rebound effect is 0.74, while the short-term rebound effect is 0.72. Therefore, the rebound effect significantly impairs functions of energy efficiency policies. For this reason, Chinese government should take the rebound effect into consideration when formulating energy policies. (C) 2013 Elsevier Ltd. All rights reserved.

C1 [Wang, Zhaohua; Lu, Milin; Wang, Jian-Cai] Beijing Inst Technol, Sch Management & Econ, Beijing 100081, Peoples R China.

[Wang, Zhaohua; Lu, Milin] Beijing Inst Technol, Ctr Energy & Environm Policy Res, Beijing 100081, Peoples R China.

RP Wang, ZH (reprint author), Beijing Inst Technol, Sch Management & Econ, Beijing 100081, Peoples R China.

EM wangzhaohua@bit.edu.cn

FU Fok Ying Tung Education Foundation [121079]; National Natural Science Foundation of China [71173017, 71271030, 71172106, 71020107026];

Ministry of Education of China [20101101110034]; State Key Development Program of Basic Research of China [2012CB955703, 2012CB955704]; Nature Science Foundation of Beijing [9112013]

FX This study is supported by the Fok Ying Tung Education Foundation (Reference no. 121079), National Natural Science Foundation of China (Reference nos. 71173017, 71271030, 71172106, and 71020107026), Doctoral Fund of Ministry of Education of China (Reference no. 20101101110034), State Key Development Program of Basic Research of China (Reference nos.

- 2012CB955703, 2012CB955704) and Nature Science Foundation of Beijing (Reference no. 9112013). The authors want to thank Prof. Yiming Wei, Dr. Hua Liao and Dr. Bin Zhang for their comments and suggestions. The authors also express their gratitude to postgraduates Hualin Zeng, Kun Wang, Chen Wang and Lin Yang for providing their linguistic support.
- CR BECKER GS, 1965, *ECON J*, V75, P493, DOI 10.2307/2228949
- Bentzen J, 2004, *ENERG ECON*, V26, P123, DOI 10.1016/S0140-9883(03)00047-1
- Berkhout PHG, 2000, *ENERG POLICY*, V28, P425, DOI 10.1016/S0301-4215(00)00022-7
- Bilgili F, 2011, *ECON COMPUT ECON CYB*, V45, P113
- Binswanger M, 2001, *ECOL ECON*, V36, P119, DOI 10.1016/S0921-8009(00)00214-7
- Bosseboeuf D, 1997, *ENERG POLICY*, V25, P673, DOI 10.1016/S0301-4215(97)00059-1
- Brandt L, 2006, *ECON DEV CULT CHANGE*, V55, P43, DOI 10.1086/505722
- BROOKES LG, 1978, *ENERG POLICY*, V6, P94, DOI 10.1016/0301-4215(78)90031-9
- DARGAY J, 1995, *ENERG ECON*, V17, P59, DOI 10.1016/0140-9883(95)98907-L
- Dargay J., 1992, *ARE PRICE INCOME ELA*
- Dimitropoulos J., 2006, P 29 *IAEE INT C POTS*
- Frondel M, 2008, *ENERG J*, V29, P145
- GATELY D, 1993, *ENERGY J*, V14, P163
- Greene DL, 1999, *ENERGY J*, V20, P1
- Greening LA, 2000, *ENERG POLICY*, V28, P389
- Greening LA, 1998, *ENERGY USE TECHNICAL*
- Haas R, 2000, *ENERG POLICY*, V28, P403, DOI 10.1016/S0301-4215(00)00023-9
- Hass R, 1998, *ENERG ECON*, V20, P421
- HAUSMAN JA, 1978, *ECONOMETRICA*, V46, P1251, DOI 10.2307/1913827
- Jevons W.S, *COAL QUESTION INQUIR*
- Jin SH, 2007, *ENERG POLICY*, V35, P5622, DOI 10.1016/j.enpol.2007.05.028
- Kadioglu M, 1999, *J APPL METEOROL*, V38, P837, DOI 10.1175/1520-0450(1999)038<0837:DDFAAI>2.0.CO;2
- Kao C, 1999, *J ECONOMETRICS*, V90, P1, DOI 10.1016/S0304-4076(98)00023-2
- Khazzoom J. D, 1980, *ENERGY J*, V1, P21
- Liang Y., 2007, *EC RES J*, V8, P133
- Mizobuchi K, 2008, *ENERG ECON*, V30, P2486, DOI 10.1016/j.eneco.2008.01.001
- Patterson MG, 1996, *ENERG POLICY*, V24, P377, DOI 10.1016/0301-4215(96)00017-1
- Sailor DJ, 2001, *ENERGY*, V26, P645, DOI 10.1016/S0360-5442(01)00023-8
- Saunders HD, 2008, *ENERG ECON*, V30, P2184, DOI 10.1016/j.eneco.2007.11.006
- Saunders HD, 2000, *ENERG POLICY*, V28, P497, DOI 10.1016/S0301-4215(00)00025-2
- Saunders H. D., 2005, *TOPICS EC ANAL POLIC*, V5, P1
- Saunders H. D., 1992, *ENERGY J*, V13, P131, DOI DOI 10.5547/ISSN0195-6574-EJ-V0113-N04-7
- Sorrel S., 2007, *REBOUND EFFECT ASSES*
- Sorrell S, 2008, *ECOL ECON*, V65, P636, DOI 10.1016/j.ecolecon.2007.08.013
- Sorrell S, 2009, *ENERG POLICY*, V37, P1356, DOI 10.1016/j.enpol.2008.11.026
- Thom H., 1952, *MON WEA REV*, V80, P143, DOI [DOI 10.1175/1520-0493(1952)080<0143:SDSFTU>2.0.CO;2, 10. 1175/1520-0493(1952)080&LT;0143:SDSFTU&GT;2. 0. CO;2]
- von Weizsacker E., 1997, *FACTOR 4 DOUBLING WE*
- Wang ZH, 2012, *APPL ENERG*, V91, P235, DOI 10.1016/j.apenergy.2011.09.002
- Wirl F, 2009, *EC CONSERVATION PROG*
- Wooldridge Jeffrey M., 2007, *INTRO ECONOMETRICS M*
- W. Council, 2008, *EN EFF POL WORLD REV*
- NR 41
- TC 45
- Z9 46
- U1 4
- U2 30
- PU PERGAMON-ELSEVIER SCIENCE LTD
- PI OXFORD
- PA THE BOULEVARD, LANGFORD LANE, KIDLINGTON, OXFORD OX5 1GB, ENGLAND
- SN 1364-0321
- J9 RENEW SUST ENERG REV

JI Renew. Sust. Energ. Rev.  
 PD FEB  
 PY 2014  
 VL 30  
 BP 124  
 EP 132  
 DI 10.1016/j.rser.2013.09.002  
 PG 9  
 WC GREEN & SUSTAINABLE SCIENCE & TECHNOLOGY; Energy & Fuels  
 SC Science & Technology - Other Topics; Energy & Fuels  
 GA AA9OC  
 UT WOS:000331421800007  
 DA 2018-05-03  
 ER

PT B  
 AU Pierce, J  
     Schiano, DJ  
     Paulos, E  
 AF Pierce, James  
     Schiano, Diane J.  
     Paulos, Eric  
 GP ACM  
 TI Home, Habits, and Energy: Examining Domestic Interactions and Energy  
 Consumption  
 SO CHI2010: PROCEEDINGS OF THE 28TH ANNUAL CHI CONFERENCE ON HUMAN FACTORS  
 IN COMPUTING SYSTEMS, VOLS 1-4

LA English  
 DT Proceedings Paper  
 CT 28th Annual CHI Conference on Human Factors in Computing Systems  
 CY APR 10-15, 2010  
 CL Atlanta, GA

SP Google, Microsoft, NSF, Yahoo Labs, ACM SIGCHI  
 DE Energy; Sustainability; Sustainable Interaction Design

AB This paper presents findings from a qualitative study of people's everyday interactions with energy-consuming products and systems in the home. Initial results from a large online survey are also considered. This research focuses not only on "conservation behavior" but importantly investigates interactions with technology that may be characterized as "normal consumption" or "over-consumption." A novel vocabulary for analyzing and designing energy-conserving interactions is proposed based on our findings, including: cutting, trimming, switching, upgrading, and shifting. Using the proposed vocabulary, and informed by theoretical developments from various literatures, this paper demonstrates ways in which everyday interactions with technology in the home are performed without conscious consideration of energy consumption but rather are unconscious, habitual, and irrational. Implications for the design of energy-conserving interactions with technology and broader challenges for HCI research are proposed.

C1 [Pierce, James; Schiano, Diane J.] Palo Alto Res Ctr, Comp Sci Lab, Coyote Hill, CA 94304 USA.

[Pierce, James; Paulos, Eric] Carnegie Mellon Univ, HCI Inst, Pittsburgh, PA 15232 USA.

[Schiano, Diane J.] Yahoo Inc, SAMA Grp, Sunnyvale, CA 94089 USA.

RP Pierce, J (reprint author), Palo Alto Res Ctr, Comp Sci Lab, Coyote Hill, CA 94304 USA.

EM jppierce@cs.cmu.edu; schiano@yahoo-inc.com; paulos@cs.cmu.edu

FU Palo Alto Research Center (PARC); PARC Sustainability Fellowship

FX This work was funded in part by the Palo Alto Research Center (PARC).

The primary author was supported in part by a PARC Sustainability Fellowship. We thank our colleagues in the PARC Collaborative Homes project, including Marc Mosko, Ellen Isaacs, and Victoria Bellotti. We also thank the anonymous reviewers, Will Odom, and the participants in our studies.

CR Akrich M., 1992, SHAPING TECHNOLOGY B  
 BACKLUND S, 2006, P DES RES SOC INT C

BLEVIS E, 2007, P SIGCHI C HUM FACT, P503, DOI DOI 10.1145/1240624.1240705  
 Chetty M., 2008, P 10 INT C UB COMP U, P242, DOI DOI 10.1145/1409635.1409668  
 CHETTY M, 2009, P CHI 09, P1033  
 Cialdini RB, 2007, PSYCHOMETRIKA, V72, P263, DOI 10.1007/s11336-006-1560-6  
 DeCanio SJ, 1998, ENERG POLICY, V26, P441, DOI 10.1016/S0301-4215(97)00152-3  
 DILLAHUNT T, 2009, P UBICOMP 09, P255  
 Earle R., 2006, ELECT J, V19, P21, DOI DOI 10.1016/J.TEJ.2006.03.006  
 FALLMAN D, 2003, P SIGCHI C HUM FACT, P225  
 Fischer C, 2008, ENERG EFFIC, V1, P79, DOI 10.1007/s12053-008-9009-7  
 GOLDSTEIN N, ROOM VIEWPOINT UNPUB  
 GRAMHANSEN K, 2007, J CLEAN PROD, V16, P1181  
 HUANG EM, 2008, P CHI 08, P323  
 ILLICH I, 1974, ENERGY EQUITY  
 Jackson T., 2005, MOTIVATING SUSTAINAB  
 JELSMA J, 2006, USER BEHAV TECHNOLOG  
 KEMPTON W, 1985, FAMILIES ENERGY TRAN  
 LATOUR B, 2000, SHAPING TECHNOLOGY B  
 Norman D. A., 1988, DESIGN EVERYDAY THIN  
 ODOM W, 2009, P CHI 09, P1053  
 Pierce James, 2008, P 20 AUSTR C COMP HU, P1  
 SHOVE E, 1998, HUMAN CHOICE CLIMATE, P291  
 Shove E., 2004, ECOLOGICAL EC CONSUM, P111  
 Shove E, 2003, COMFORT CLEANLINESS  
 Slob A., 2006, USER BEHAV TECHNOLOG  
 Strengers Yolande, 2008, P 20 AUSTR C COMP HU, P9, DOI DOI 10.1145/1517744.1517747  
 TVERSKY A, 1974, SCIENCE, V185, P1124, DOI 10.1126/science.185.4157.1124  
 Verbeek P.-P., 2005, WHAT THINGS DO PHILO  
 WAKKARY R, 2009, P CHI 09, P365  
 WILHITE H, 2007, P ECEEE 2007 SUMM ST, P23  
 Wilson C, 2007, ANNU REV ENV RESOUR, V32, P169, DOI 10.1146/annurev.energy.32.053006.141137  
 WOODRUFF A, 2008, P 26 ANN SIGCHI C HU, P313, DOI DOI 10.1145/1357054.1357109  
 ZIMMERMAN J, 2007, P SIGCHI C HUM FACT, P493

NR 34

TC 43

Z9 43

U1 0

U2 7

PU ASSOC COMPUTING MACHINERY

PI NEW YORK

PA 1515 BROADWAY, NEW YORK, NY 10036-9998 USA

BN 978-1-60558-929-9

PY 2010

BP 1985

EP +

PG 3

WC Computer Science, Information Systems; Computer Science,  
 Interdisciplinary Applications; Computer Science, Theory & Methods

SC Computer Science

GA BQM07

UT WOS:000281276701068

DA 2018-05-03

ER

PT J

AU Sartori, I

Wachenfeldt, BJ

Hestnes, AG

AF Sartori, Igor

Wachenfeldt, Bjorn Jensen

Hestnes, Anne Grete

TI Energy demand in the Norwegian building stock: Scenarios on potential reduction

SO ENERGY POLICY

LA English

DT Article

DE Energy demand; Building stock; Scenario analysis

ID CURRENT TRENDS; SECTOR

AB A model has been developed for studying the effect of three hypothetical approaches in reducing electricity and energy demand in the Norwegian building stock: wide diffusion of thermal carriers, heat pumps and conservation measures, respectively. Combinations of these are also considered. The model has a demand side perspective, considers both residential and service sectors, and calculates energy flows from net to delivered energy. Energy demand is given by the product of activity and intensity matrices. The activity levels are defined for the stock and the new construction, renovation and demolition flows. The intensity properties are defined in archetypes, and are the result of different energy class and heating carriers share options. The scenarios are shaped by combining the activity flows with different archetypes. The results show that adopting conservation measures on a large scale does allow reducing both electricity and total energy demand from present day levels while the building stock keeps growing. The results also highlight the importance of making a clear distinction between the assumptions on intensity and activity levels. (C) 2009 Elsevier Ltd. All rights reserved.

C1 [Sartori, Igor; Hestnes, Anne Grete] Norwegian Univ Sci & Technol NTNU, Dept Architectural Design Hist & Technol, N-7491 Trondheim, Norway.

[Wachenfeldt, Bjorn Jensen] SINTEF Bldg & Infrastruct, N-7465 Trondheim, Norway.

RP Sartori, I (reprint author), SINTEF Bldg & Infrastruct, Pb 124 Blindern, N-0314 Oslo, Norway.

EM igor.sartori@sintef.no

CR Boeng A. C., 2005, ENERGIBRUK HUSHOLDNI

\*DGET, 2004, EUR UN EN TRANSP F 2

\*ECBCS, 2004, ANN 31 EN REL ENV IM

EGGEN G, 2005, NVE VARMEPUMPENS BID

\*EN, 2007, 15217 EN CEN

\*EN, 2006, SER BYGN EN 2002 200

GRORUD C, 2007, FREMSKRIVNING VARMEP

Johansson P, 2007, ENER POLICY, V35, P1386, DOI 10.1016/j.enpol.2006.03.025

Johansson P, 2006, ENER POLICY, V34, P3049, DOI 10.1016/j.enpol.2005.05.012

MYHRE L, 2000, 41 NBI

Nassen J, 2005, ENER POLICY, V33, P1037, DOI 10.1016/j.enpol.2003.11.004

\*NVE, 2008, STAT AN IMP EKSP 199

PETTERSEN TD, 2005, O20461 NVE BYGGF

RODSETH A, 1997, SIMULATION MODEL NOR

SARTORI I, 2007, A07009 SBF BY SINTEF

SARTORI I, 2006, EPLAN DATA ACTIVITY

Sartori I, 2008, BUILD RES INF, V36, P412, DOI 10.1080/09613210802184312

\*STAT NORW, 2007, IND ACT CONSTR

\*STAT NORW, 2001, SER POP HOUS CENS FO

\*STAT NORW, 2007, POP

\*STAT NORW, 2007, NAT RES ENV RES ENG

STEEN P, 1981, EN TILL VAD HOR MYCK

\*TEK, 2007, VEIL TEKNISK FORSKR

THYHOLT M, 2007, A07002 SBF BY NYE EN

THYHOLT M, 2006, THESIS NTNU, P162

WACHENFELDT BJ, 2004, SPREADSHEET TOOL SCE

WACHENFELDT BJ, 2007, VARME ENERGIETTERSPO

WIGENSTAD T, 2005, STF50F05117 NVE SINT

NR 28

TC 43

Z9 43

U1 0

U2 6  
 PU ELSEVIER SCI LTD  
 PI OXFORD  
 PA THE BOULEVARD, LANGFORD LANE, KIDLINGTON, OXFORD OX5 1GB, OXON, ENGLAND  
 SN 0301-4215  
 J9 ENERGO POLICY  
 JI Energy Policy  
 PD MAY  
 PY 2009  
 VL 37  
 IS 5  
 BP 1614  
 EP 1627  
 DI 10.1016/j.enpol.2008.12.031  
 PG 14  
 WC Economics; Energy & Fuels; Environmental Sciences; Environmental Studies  
 SC Business & Economics; Energy & Fuels; Environmental Sciences & Ecology  
 GA 437BS  
 UT WOS:000265461400003  
 DA 2018-05-03  
 ER

PT J  
 AU Rhodes, JD  
 Cole, WJ  
 Upshaw, CR  
 Edgar, TF  
 Webber, ME  
 AF Rhodes, Joshua D.  
 Cole, Wesley J.  
 Upshaw, Charles R.  
 Edgar, Thomas F.  
 Webber, Michael E.

TI Clustering analysis of residential electricity demand profiles

SO APPLIED ENERGY

LA English

DT Article

DE Energy; Smart meter data; Residential

ID ENERGY-CONSUMPTION; EMISSIONS; IMPACTS; AUSTIN; TEXAS; POWER

AB Little is known about variations in electricity use at finely-resolved timescales, or the drivers for those variations. Using measured electricity use data from 103 homes in Austin, TX, this analysis sought to (1) determine the shape of seasonally-resolved residential demand profiles, (2) determine the optimal number of normalized representative residential electricity use profiles within each season, and (3) draw correlations to the different profiles based on survey data from the occupants of the 103 homes. Within each season, homes with similar hourly electricity use patterns were clustered into groups using the k-means clustering algorithm. Then probit regression was performed to determine if homeowner survey responses could serve as predictors for the clustering results. This analysis found that Austin homes fall into one of two seasonal groups with some homes using more expensive electricity (from a wholesale electricity market perspective) than others. Regression results indicate that variables such as if someone works from home, hours of television watched per week, and education levels have significant correlations with average profile shape, but might vary across seasons. The results herein also indicate that policies such as time-of-use or real-time electricity structures might be more likely to affect lower income households during some high electricity use parts of the year. (C) 2014 Published by Elsevier Ltd.

C1 [Rhodes, Joshua D.] Univ Texas Austin, Dept Civil Architectural & Environm Engr, Austin, TX 78712 USA.

[Cole, Wesley J.; Edgar, Thomas F.] Univ Texas Austin, McKetta Dept Chem Engr, Austin, TX 78712 USA.

[Upshaw, Charles R.] Univ Texas Austin, Dept Mech Engr, Austin, TX 78712 USA.

[Edgar, Thomas F.; Webber, Michael E.] Univ Texas Austin, Energy Inst, Austin, TX 78712 USA.

RP Rhodes, JD (reprint author), Univ Texas Austin, Dept Civil Architectural & Environm Engn, 301 E Dean Keeton St, Stop C1752, Austin, TX 78712 USA.

EM joshdr@utexas.edu; wcole@che.utexas.edu; crupshaw@utexas.edu; edgar@mail.utexas.edu; webber@mail.utexas.edu

FU National Science Foundation [DGE-1110007]

FX The authors would like to thank the US Department of Energy, the Doris Duke Charitable Foundation, Austin Energy, the Texas Advanced Computing Center, and Pecan Street Inc. for their direct and in-kind support. The authors would also like to thank the study participants and the Mueller neighborhood groups for their support. This material is partly based upon work supported by the National Science Foundation Graduate Research Fellowship under Grant No. DGE-1110007. Any opinion, findings, and conclusions or recommendations expressed in this material are those of the authors and do not necessarily reflect the views of the National Science Foundation.

CR \*AUST EN, 2014, DATA F85ED7EF E7BF 4

Chicco G, 2012, ENERGY, V42, P68, DOI 10.1016/j.energy.2011.12.031

DOGGETT T, 2011, UT SMART GRID CONFER

Engle R. F., 1984, HDB ECONOMETRICS, V2, P775, DOI DOI 10.1016/S1573-4412(84)02005-5

FERNIHOUGH A, 2013, CRAN PACKAGE MFX

GELMAN A, 2006, ANALYTICAL METHODS F, V625

HARRIS CB, 2014, THESIS

Harris CB, 2014, APPL ENERG, V126, P172, DOI 10.1016/j.apenergy.2014.03.078

Hothorn T., 2009, HDB STAT ANAL USING

Katzenstein W, 2009, ENVIRON SCI TECHNOL, V43, P253, DOI 10.1021/es801437t

Kim Y. H., 2011, 2011 IEEE 38th International Conference on Plasma Sciences (ICOPS), DOI [10.1109/PLASMA.2011.5993364, 10.1109/CWIT.2011.5872110, 10.1109/PLASMA.2011.5993283, 10.1109/PLASMA.2011.5993073]

Kwac J, 2014, IEEE T SMART GRID, V5, P420, DOI 10.1109/TSG.2013.2278477

Liao TW, 2005, PATTERN RECOGN, V38, P1857, DOI 10.1016/j.patcog.2005.01.025

MCCRACKEN B, 2013, RESIDENTIAL EV CHARG

MEEHAN CM, 2012, 31ST USAEE IAEE NORT, P1

Mokhtarian PL, 1998, TRANSPORT RES D-TR E, V3, P419, DOI 10.1016/S1361-9209(98)00018-2

PANAPAKIDIS IP, 2012, 2012 INTERNATIONAL C, P1

Rasanen T, 2010, APPL ENERG, V87, P3538, DOI 10.1016/j.apenergy.2010.05.015

Reddy TA, 2011, APPLIED DATA ANALYSIS AND MODELING FOR ENERGY ENGINEERS AND SCIENTISTS, P231, DOI 10.1007/978-1-4419-9613-8\_8

Rhodes J, 2012, ASHRAE TRAN, V118, P143

Rhodes JD, 2014, ENERGY, V65, P462, DOI 10.1016/j.energy.2013.11.004

Rhodes JD, 2011, ENERGBUILDINGS, V43, P3271, DOI 10.1016/j.enbuild.2011.08.032

Sanquist TF, 2012, ENERGPOLICY, V42, P354, DOI 10.1016/j.enpol.2011.11.092

SRIVASTAVA AK, 2012, 2012 IEEE POWER AND, P1

U. S. Department of Energy, 2011, TECH REP

\*US EIA, 2013, HEATING AND COOLING

Zhou KL, 2013, RENEW SUST ENERGEREV, V24, P103, DOI 10.1016/j.rser.2013.03.023

2014, PACKAGE NBCLUST

NR 28

TC 42

Z9 43

U1 3

U2 24

PU ELSEVIER SCI LTD

PI OXFORD

PA THE BOULEVARD, LANGFORD LANE, KIDLINGTON, OXFORD OX5 1GB, OXON, ENGLAND

SN 0306-2619

EI 1872-9118

J9 APPL ENERG

J1 Appl. Energy

PD DEC 15  
 PY 2014  
 VL 135  
 SI SI  
 BP 461  
 EP 471  
 DI 10.1016/j.apenergy.2014.08.111  
 PG 11  
 WC Energy & Fuels; Engineering, Chemical  
 SC Energy & Fuels; Engineering  
 GA AU2TJ  
 UT WOS:000345470100045  
 DA 2018-05-03  
 ER

PT J  
 AU Zhou, N  
 Lin, J  
 AF Zhou, Nan  
 Lin, Jiang  
 TI The reality and future scenarios of commercial building energy  
 consumption in China

SO ENERGY AND BUILDINGS

LA English

DT Article

DE China; Commercial building; Energy intensity; Energy efficiency;  
 Scenario; Elasticity; Bottom-up modeling; Energy statistics; Energy  
 consumption

AB While China's 11th Five-Year Plan called for a reduction of energy intensity by 2010, whether and how the energy consumption trend can be changed in a short time has been hotly debated. This research intends to evaluate the impact of a variety of scenarios of gross domestic product (GDP) growth, energy elasticity and energy-efficiency improvement on energy consumption in commercial buildings in China using a detailed China End-Use Energy Model.

China's official energy statistics have limited information on energy demand by end-use. This is a particularly pertinent issue for building energy consumption. The authors have applied reasoned judgments, based on experience of working on Chinese efficiency standards and energy-related programs, to present a realistic interpretation of the current energy data. The bottom-up approach allows detailed consideration of end-use intensity, equipment efficiency, etc., thus facilitating assessment of potential impacts of specific policy and technology changes on building energy use.

The results suggest that: (1) commercial energy consumption in China's current statistics is underestimated by about 44%, and the fuel mix is misleading; (2) energy-efficiency improvements will not be sufficient to offset the strong increase in end-use penetration and intensity in commercial buildings; (3) energy intensity (particularly electricity) in commercial buildings will increase; (4) different GDP growth and elasticity scenarios could lead to a wide range of floor area growth trajectories, and therefore, significantly impact energy consumption in commercial buildings. (C) 2008 Elsevier B.V. All rights reserved.

C1 [Zhou, Nan] Ernest Orlando Lawrence Berkeley Natl Lab, Energy Anal Dept, Berkeley, CA 94720 USA.

RP Zhou, N (reprint author), Ernest Orlando Lawrence Berkeley Natl Lab, Energy Anal Dept, 1 Cyclotron Rd, MS 90R4000, Berkeley, CA 94720 USA.

EM NZhou@lbl.gov

FU McKinsey Global Institute (MGI)

FX The authors thank the McKinsey Global Institute (MGI) for its support of this work. In particular the authors would like to thank Florian Bressand for his involvement and advice that helped shape many of the concepts presented here.

CR Chen Chen, 2006, ESTABLISHMENT APPL C

\*COMM RNECSPC, 2005, RES NAT EN COMPR STR

\*EERE DOE, 2006, IND EN INT US



Fridley D, CHINA ENERGY DATABOO  
 IEA, 2004, 30 YEARS EN US IEA C  
 \*IEEJ, 2003, HDB EN EC STAT JAP E  
 Kang YB, 2005, INT J GLOBAL ENERGY, V24, P280  
 Lin Jiang, 2006, LBNL61800  
 MGI, 2006, MAD CHIN SOLD CHIN R  
 \*MGI, 2006, PROD GROW GLOB EN DE  
 National Bureau of Statistics, CHIN STAT YB  
 National Development and Reform Commission, 2006, OV 11 5 YEAR PLAN NA  
 QINGYI W, 2005, ENERGY DATA FISCAL E  
 Schipper L, 1992, ENERGY EFFICIENCY HU  
 Sinton J., 2001, LBNL48919  
 Sinton JE, 1996, CHINA ENERGY DATABOO  
 YONG W, 2006, STRENGTHENING BUILDI  
 ZHOU D, 2003, CHIN SUST EN SCEN 20

NR 18

TC 42

Z9 42

U1 1

U2 16

PU ELSEVIER SCIENCE SA

PI LAUSANNE

PA PO BOX 564, 1001 LAUSANNE, SWITZERLAND

SN 0378-7788

J9 ENERGBUILDINGS

J1 Energy Build.

PY 2008

VL 40

IS 12

BP 2121

EP 2127

DI 10.1016/j.enbuild.2008.06.009

PG 7

WC Construction & Building Technology; Energy & Fuels; Engineering, Civil

SC Construction & Building Technology; Energy & Fuels; Engineering

GA 363OI

UT WOS:000260276200003

DA 2018-05-03

ER

PT J

AU Santamouris, M

AF Santamouris, Mat

TI Innovating to zero the building sector in Europe: Minimising the energy consumption, eradication of the energy poverty and mitigating the local climate change

SO SOLAR ENERGY

LA English

DT Article

DE Near zero energy buildings; Climate change; Low income households; Energy poverty; Local climate change and urban heat island; Mitigation and adaptation

ID URBAN HEAT-ISLAND; LOW-INCOME HOUSEHOLDS; INDOOR ENVIRONMENTAL-QUALITY; OF-THE-ART; THERMAL COMFORT; NIGHT-VENTILATION; DISTRIBUTIONAL IMPLICATIONS; RESIDENTIAL BUILDINGS; AMBIENT-TEMPERATURE; IMPACT

AB The present paper discusses issues related to the three major problems of the built environment in Europe and in particular, the energy consumption of buildings, the energy poverty and the local climate change. The article introduces the idea of a zero concept world where the global impact of the three specific sectors

will be diminished. The paper analyses the actual status of each sector and identifies the main problems. It discusses and sets a road map to satisfy this objective, involving future quantitative and qualitative targets for the three considered sectors while it investigates the major technological, economic and social forces and policies that have to be employed in order to minimize the energy consumption of buildings, eradicate the energy poverty and mitigate the local climate change. The links, synergies and impacts between them are analysed in a comprehensive way and the interrelated nature and characteristics of the three sectors is highlighted. The mechanisms to transform the actual problems into opportunities and appropriate drivers for future development are identified and analysed. A road map involving a full estimation of the necessary investments to fulfil the defined targets is presented. The major medium and long term benefits for the society, including the impact on the economy, employment, the environment and health are fully quantified and analysed. (C) 2016 Elsevier Ltd. All rights reserved.

C1 [Santamouris, Mat] Univ Athens, Dept Phys, Grp Bldg Environm Studies, Athens, Greece.

RP Santamouris, M (reprint author), Univ Athens, Dept Phys, Grp Bldg Environm Studies, Athens, Greece.

EM msantam@phys.uoa.gr

OI Santamouris, Matthaios/0000-0001-6076-3526

CR Akbari H, 2016, J CIV ENG MANAG, V22, P1, DOI 10.3846/13923730.2015.1111934

Akbari H, 2009, CLIMATIC CHANGE, V94, P275, DOI 10.1007/s10584-008-9515-9

ARUP, 2014, RED URB HEAT RISK ST

Asimakopoulos DA, 2012, ENERGBUILDINGS, V49, P488, DOI 10.1016/j.enbuild.2012.02.043

Baccini M, 2008, EPIDEMIOLOGY, V19, P711, DOI 10.1097/EDE.0b013e318176bfcd

Barker T., 1998, FISCAL STUDIES, V19, P375

Bartzokas A, 2013, NAT HAZARD EARTH SYS, V13, P3271, DOI 10.5194/nhess-13-3271-2013

Basu R, 2002, EPIDEMIOL REV, V24, P190, DOI 10.1093/epirev/mxf007

Benzie M., 2011, VULNERABILITY HEAT W

BIMHow, 2015, IMP CONSTR IND ENV

Bird J., 2010, LONG COLD WINTER BEA

Bohnenstengel SI, 2014, Q J ROY METEOR SOC, V140, P687, DOI 10.1002/qj.2144

Bouzarovski S., 2015, SOCIAL JUSTICE CLIMA

Bouzarovski S., 2011, ENERGY POVERTY EU RE

Bouzarovski S, 2014, WIRES ENERGY ENVIRON, V3, P276, DOI 10.1002/wene.89

Bouzarovski S, 2012, ENERGPOLICY, V49, P76, DOI 10.1016/j.enpol.2012.01.033

Boyd, 1995, J ENVIRON ECON MANAG, V29, P1

BPIE, 2011, BUILD PERF I EUR EUR

Butterworth N., 2011, KIRKLEES WARM ZONE E

Buzar S, 2007, GEOFORUM, V38, P224, DOI 10.1016/j.geoforum.2006.02.007

BWI Building and Woodworkers International, 2006, DEF WORK RIGHTS CONS

BWI Building and Wood Workers International, 2006, BRIEF LAB STAND CONS

Callan T, 2009, ENERGPOLICY, V37, P407, DOI 10.1016/j.enpol.2008.08.034

Welsh School of Architecture Cardiff University, 2012, ARB 1 SCHEM EV WARM

Cartalis C, 2001, ENERGBUILDINGS, V42, P1647, DOI 10.1016/S0196-8904(00)00156-4

Cecodhas, HOUS EUR REV NUTS BO

Cellura M, 2013, RENEW ENER, V60, P586, DOI 10.1016/j.renene.2013.06.019

Changnon SA, 1999, CLIMATIC CHANGE, V42, P531, DOI 10.1023/A:1005453217967

Chen C, 2012, ENVIRON HEALTH PERSP, V120, P235, DOI 10.1289/ehp.1103970

Chief Medical Officer, 2009, ANN REP 2009

Christenson M, 2006, ENERGBUILDINGS, V47, P671, DOI 10.1016/j.enconman.2005.06.009

Ciscar J-C, 2014, JRC SCI POLICY REPOR

Clinch JP, 2000, J EPIDEMIOL COMMUN H, V54, P719, DOI 10.1136/jech.54.9.719

Confalonieri U., 2007, CLIMATE CHANGE 2007

Cool Cities Alliance, 2012, PRACT GUID COOL ROOF

Defaix PR, 2012, SOL ENERGY, V86, P2644, DOI 10.1016/j.solener.2012.06.007

Department for Communities and Local Government, 2010, ENGL HOUS SURV HOUS

Department of Health UK, 2010, PUBL HLTH WHIT PAP

Dol K., 2010, HOUSING STAT EUROPEA

Dresner S, 2006, FISC STUD, V27, P47, DOI 10.1111/j.1475-5890.2006.00027.x

Energy Action Scotland (EAS) and National Energy Action (NEA) (England and Wales), 2009, COST AFF

WARMTH

Ecocity, 2014, PROP ATM POLL ATH

EEA, 2012, CLIM CHANG IMP VULN  
Emrath P., 2015, IMPACT HOME BUILDING  
Energy Efficiency Industrial Forum, 2012, SURV EMPL EFF INV EN  
European Pathway to Zero Waste (EPOW), 2012, EUR PATHW ZER WAST E  
EPA, 2008, RED URB HEAT ISL COM  
EPEE, 2009, TRACKL FUEL POV EUR  
EPIA, 2014, GLOB MARK OUTL PHOT  
EST, 2008, ROADM 60 EC 1960S FL  
[Anonymous], 2015, OUTL TO 2030  
European Union EU, 2010, OFFICIAL J EUROPEA L, V153/13  
Eurostat, 2003, PROP POP HOUS PROBL  
Eurostat, 2015, POP STRUCT AG  
Eurostat, 2015, INC DISTR STAT  
European Commision, 2015, JRC SCI POL REP  
European Commission, 2014, COM2014520 EUR COMM  
European Concerted Action, 2015, EN PERF BUILD  
[Anonymous], 2003, 1 EUR QUAL LIF SURV  
European Trade Union Confederation, 2007, CLIM CHANG EMPL  
European Union: Commission Staff Working Document, 2013, SWD2013137 EUR UN  
EURO4M, 2015, 2014 WARM YEAR REC E  
Evans GW, 2002, ANNU REV PUBL HEALTH, V23, P303, DOI  
10.1146/annurev.publhealth.23.112001.112349  
Federal Ministry for the Environment Nature Conservation Building and Nuclear Safety (BMUB), 2014,  
GREENTECH MAD GERM 4  
Ferguson G, 2007, GEOPHYS RES LETT, V34, DOI 10.1029/2007GL032324  
Filiberto D, 2009, GENERATIONS, V33, P19  
Fintikakis N, 2011, SUSTAIN CITIES SOC, V1, P54, DOI 10.1016/j.scs.2010.12.001  
Gaitani N, 2014, SUSTAIN CITIES SOC, V13, P230, DOI 10.1016/j.scs.2014.02.006  
Gaitani, 2011, J BUILD SERVICES ENG, V32, P53  
Gamble J., 2013, ENV HLTH PERSPECT, V121, P1  
GEA Global Energy Assessment, 2012, SUST FUT  
Geros V, 1999, ENERG BUILDINGS, V29, P141, DOI 10.1016/S0378-7788(98)00056-5  
Giannopoulou K., 2013, SUSTAINABLE CITIES S, V10, P184  
Giannopoulou, 2011, J SUST CITIES SOC, V1, P16  
Glass, 2015, GLASS  
Global Construction Perspectives and Oxford Economics, 2013, GLB CONSTR 2025  
Green Futures, 2008, FUT IS RETR FIT BRIN  
Green G, 2008, WARM FRONT BETTER HL  
Greening LA, 2000, ENERG POLICY, V28, P389  
Grepperud S, 2004, ENERG ECON, V26, P261, DOI 10.1016/j.eneco.2003.11.003  
Hajat S, 2006, EPIDEMIOLOGY, V17, P632, DOI 10.1097/01.ede.0000239688.70829.63  
Hamilton IG, 2009, BUILD ENVIRON, V44, P807, DOI 10.1016/j.buildenv.2008.05.024  
Hanley N, 2009, ECOL ECON, V68, P692, DOI 10.1016/j.ecolecon.2008.06.004  
Hassid S, 2000, ENERG BUILDINGS, V32, P131, DOI 10.1016/S0378-7788(99)00045-6  
Healy J. D., 2003, EPIDEMIOL COMMUN HLT, V2003, P784  
Hermelink A., 2006, SOLANOVA P EUR C COO  
Hong SH, 2009, BUILD ENVIRON, V44, P1228, DOI 10.1016/j.buildenv.2008.09.003  
House of Commons UK Parliament, 2009, ENV FOOD RUR AFF COM  
Hultgren A., 2011, SWCA ENV CONSULTANTS  
Hutchinson EJ, 2006, APPL ENERG, V83, P1198, DOI 10.1016/j.apenergy.2006.01.007  
International Energy Agency (IEA), 2011, CO2 EM KWH EL HEAT G  
IHS Economics, 2013, GLOB CONSTR OUTL EX  
IIASA, 2015, EN END US BUILD  
International Energy Agency, 2013, WORLD EN OUTL 2013  
IPCC, 2008, CLIMATE CHANGE 2007  
Irish Department of Communications Energy and Natural Resources, 2015, WARM HOM STRAT AFF E  
Jenkins DP, 2010, ENERG POLICY, V38, P832, DOI 10.1016/j.enpol.2009.10.030  
Kapsomenakis J, 2013, ENERG CONVERS MANAGE, V74, P353, DOI 10.1016/j.enconman.2013.05.005

- Mellon Carnegie, 2005, CIT GREEN AM SCH COS
- Keatinge WR, 2000, BRIT MED J, V321, P670, DOI 10.1136/bmj.321.7262.670
- Kelly B., 2015, PROCESS SOCIOECONOMI
- Klinenberg, 2002, HEAT WAVE SOCIAL AUT
- Kolokotroni M, 2012, ENER G BUILDINGS, V47, P302, DOI 10.1016/j.enbuild.2011.12.019
- Kolokotsa D, 2015, SCI TOTAL ENVIRON, V536, P316, DOI 10.1016/j.scitotenv.2015.07.073
- Kovats RS, 2006, EUR J PUBLIC HEALTH, V16, P592, DOI 10.1093/eurpbu/ckl049
- Kruger Eduardo Drach Patricia Emmanuel Rohinton Corbella Oscar, 2012, THEOR APPL CLIMATOL
- Lampietti J., 2002, HEAT IS LUXURY HELPI
- LEVINSON R, 2008, ESTIMATING SOLAR ACC
- Livada I, 2002, THEOR APPL CLIMATOL, V71, P219, DOI 10.1007/s007040200006
- Lokoshchenko M. A., 2015, Urban Climate, V13, P1, DOI 10.1016/j.uclim.2015.04.002
- Lomas KJ, 2013, BUILD RES INF, V41, P259, DOI 10.1080/09613218.2013.757886
- Mastrapostoli E, 2014, ENER G BUILDINGS, V69, P417, DOI 10.1016/j.enbuild.2013.10.024
- Mavrogianni A, 2010, OPEN HOUSE INT, V35, P49
- McCarthy M., 2009, 036961 CIRCE EUR COM
- McGregor G, 2007, SC20061SR6 ENV AG
- Michelozzi P, 1999, J EPIDEMIOL COMMUN H, V53, P687, DOI 10.1136/jech.53.11.687
- Mihalakakou P., 2002, J APPL METEOROL, V41, P5
- Mihalakakou P., 1994, J ENERGY CONVERS MAN, V35, P395
- Mihalakakou P. G., 1994, ENERGY, V19, P17
- Mirasdegis S., 2007, ENER G CONVERS MANAGE, P1737
- National Association of Home Builders, 2015, EC IMP HOM BUILD TYP
- Odyssee-Mure, 2012, EN EFF TRENDS BUILD
- OECD, 1996, IMPL STRAT ENV TAX
- Pais Jesim, 2002, EC POLITICAL WEEKLY, V46
- Palmer J., 2013, UK HOUS EN FACT FIL
- Pantavou K, 2014, BUILD ENVIRON, V80, P283, DOI 10.1016/j.buildenv.2014.06.001
- Papanastasiou DK, 2015, ATMOS RES, V152, P4, DOI 10.1016/j.atmosres.2014.06.002
- Paravantis I., 2015, ADV BUILD E IN PRESS
- Poltimae Helen, 2009, DISCUSS ESTONIAN EC, V17
- Guertler P., 2008, MUCH COST ALLEVIATIN
- Rai AC, 2013, ATMOS ENVIRON, V77, P885, DOI 10.1016/j.atmosenv.2013.05.062
- Ramponi R, 2014, ENER G BUILDINGS, V78, P25, DOI 10.1016/j.enbuild.2014.04.001
- Roberts S., 2007, ASSESSING SOCIAL IMP
- Roberts S, 2008, ENER G POLICY, V36, P4471, DOI 10.1016/j.enpol.2008.09.025
- Rozzini Renzo, 2004, J Am Med Dir Assoc, V5, P138, DOI 10.1097/01.JAM.0000113427.45325.81
- Rubbelke D, 2011, 349 CEPS
- Sakka, 2012, ENERGY BUILD, V49, P69
- Santamouris K., 2007, ENER G BUILDINGS, V39, P893
- Santamouris M, 2007, ENER G BUILDINGS, V39, P859, DOI 10.1016/j.enbuild.2007.02.008
- Santamouris M, 2007, CLIMATIC CHANGE, V80, P265, DOI 10.1007/s10584-006-9128-0
- Santamouris M, 2015, ENER G BUILDINGS, V98, P119, DOI 10.1016/j.enbuild.2014.09.052
- Santamouris M, 2015, ENER G BUILDINGS, V91, P43, DOI 10.1016/j.enbuild.2015.01.027
- Santamouris M, 2014, ENER G BUILDINGS, V82, P100, DOI 10.1016/j.enbuild.2014.07.022
- Santamouris M, 2014, SOL ENERGY, V103, P682, DOI 10.1016/j.solener.2012.07.003
- Santamouris M, 2014, ENER G BUILDINGS, V70, P61, DOI 10.1016/j.enbuild.2013.11.074
- Santamouris M, 2013, RENEW SUST ENER G REV, V26, P224, DOI 10.1016/j.rser.2013.05.047
- Santamouris M, 2012, BUILD ENVIRON, V53, P128, DOI 10.1016/j.buildenv.2012.01.022
- Santamouris M, 2010, ENER G BUILDINGS, V42, P1309, DOI 10.1016/j.enbuild.2010.02.024
- Santamouris M, 2001, SOL ENERGY, V70, P201, DOI 10.1016/S0038-092X(00)00095-5
- Santamouris M., 2015, ENERGY BUILD, V98
- Santamouris M, 2007, ADV BUILD ENERGY RES, V1, P123, DOI 10.1080/17512549.2007.9687272
- Santamouris M, 2015, SUSTAIN CITIES SOC, V19, P281, DOI 10.1016/j.scs.2015.02.001
- Santamouris M, 2013, ENER G BUILDINGS, V57, P74, DOI 10.1016/j.enbuild.2012.11.002
- Santamouris, 2013, ENERGY BUILD, V65, P477
- Santamouris, 2011, SOL ENERGY, V85, P3085
- Sarrat C, 2006, ATMOS ENVIRON, V40, P1743, DOI 10.1016/j.atmosenv.2005.11.037

Sheffield Hallam University, 2008, HLTH IMP EV WARM FRO  
 Sims R, 2007, CLIMATE CHANGE 2007  
 Singh S, 2012, NEW MEGA TRENDS: IMPLICATIONS FOR OUR FUTURE LIVES, P1, DOI 10.1057/9781137008091  
 Skumatz L., 2010, NONENERGY BENEFITS S  
 Speck S, 1999, ENER POLICY, V27, P659, DOI 10.1016/S0301-4215(99)00059-2  
 Stathopoulou E, 2008, J EARTH SYST SCI, V117, P227, DOI 10.1007/s12040-008-0027-9  
 Summerfield AJ, 2007, ENER BUILDINGS, V39, P783, DOI 10.1016/j.enbuild.2007.02.012  
 Sustainable Energy Authority of Ireland, 2009, 3 SUST EN AUTH IR  
 Sustainable Energy Authority of Ireland, 2013, EN EFF RES SECT  
 Sustainable Energy Security, 2015, SUST GROWTH GROWTH V  
 Symons E, 2000, EFFECTS POLLUTION EN  
 Synnefa A, 2007, ENER BUILDINGS, V39, P1167, DOI 10.1016/j.enbuild.2006.01.004  
 Synnefa, 2012, ENERGY BUILD, V55, P35  
 Taniguchi M., 2006, CLIMATE DISCUSSIONS, V2, P831  
 Thomson H, 2013, ENER POLICY, V52, P563, DOI 10.1016/j.enpol.2012.10.009  
 Tiezzi S, 2005, ENER POLICY, V33, P1597, DOI 10.1016/j.enpol.2004.01.016  
 Turner K, 2009, ENER ECON, V31, P648, DOI 10.1016/j.eneco.2009.01.008  
 UK Government Department of Energy and Climate Change (DECC), 2009, ADDR FUEL POV  
 United Nations, 2009, URB RUR AR  
 United Nations Development Program, 2015, IMPR EN EFF LOW INC  
 UN-Habitat, 2013, STREETS PUBL SPAC DR  
 Un- Habitat, 2011, CIT CLIM CHANG GLOB  
 Union Sociale pour l'Habitat, 2013, EUR INV LOG SOC PLAN  
 UNDP, 2004, STUCK EN ENV POV SER  
 United Nations Environment Programme (UNEP), 2012, BUILD DES CONSTR FOR  
 Urge-Vorsatz D., 2012, ENERGY POLICY  
 Urge-Vorsatz D., 2012, GLOBAL ENERGY ASSESS  
 Vandentorren S, 2006, EUR J PUBLIC HEALTH, V16, P583, DOI 10.1093/eurpub/ck1063  
 Vliet Van, 2012, NATURE CLIMATE CHANG, V2, P676  
 Washan P., 2014, BUILDING FUTURE EC F  
 WBCSD, 2009, TRANSF MARK EN EFF B  
 WHO, 2006, FUEL LIF HOUS EN HLT  
 World Health Organization,, 2007, LARG AN REV EUR HOUS  
 WIEGO, 2015, WOM INF EC GLOB ORG  
 Wigley K.J., 1997, 18 N AM C USAEE IAEE  
 Wingfield J., 2008, 393663 CI PARTN INN  
 World Bank: Urban Development, 2015, URB DEV  
 World Economy Profile, 2014, WORLD EC PROFILE  
 World Resources Institute, 2010, GREEN INV HOR EFF PO  
 Worldwatch Institute, 2008, GREEN JOBS SUST WORK  
 Wright A, 2005, BUILD SERV ENG RES T, V26, P285, DOI [DOI 10.1191/0143624405BT1360A, DOI 10.1191/0143624405BT1360A]  
 Yohanis YG, 2010, APPL ENER, V87, P681, DOI 10.1016/j.apenergy.2009.08.003  
 Zhao P., 2005, P IND AIR 2005  
 [Anonymous], 2011, MARMOT REVIEW  
 [Anonymous], 2015, WORLD URB AR 11 ED  
 [Anonymous], 2012, NANOMARKETS SMART WI  
 [Anonymous], 2012, INTRO FUEL POVERTY B

NR 203  
 TC 41  
 Z9 41  
 U1 14  
 U2 31  
 PU PERGAMON-ELSEVIER SCIENCE LTD  
 PI OXFORD  
 PA THE BOULEVARD, LANGFORD LANE, KIDLINGTON, OXFORD OX5 1GB, ENGLAND  
 SN 0038-092X

J9 SOL ENERGY

J1 Sol. Energy

PD APR

PY 2016

VL 128

SI SI

BP 61

EP 94

DI 10.1016/j.solener.2016.01.021

PG 34

WC Energy & Fuels

SC Energy & Fuels

GA DJ0AY

UT WOS:000373865000004

DA 2018-05-03

ER

PT J

AU Baynes, T

Lenzen, M

Steinberger, JK

Bai, XM

AF Baynes, Timothy

Lenzen, Manfred

Steinberger, Julia K.

Bai, Xuemei

TI Comparison of household consumption and regional production approaches to assess urban energy use and implications for policy

SO ENERGY POLICY

LA English

DT Article

DE Input-output analysis; Regional assessment; Energy catchment

ID CARBON FOOTPRINT; GREENHOUSE GASES; CITY-SCALE; CITIES; REQUIREMENTS; COST; TRANSPORT; AUSTRALIA; TRADE

AB Assessment of urban energy use may proceed by a number of methods. Here we derive an energy account from local statistics, and compare them with an input output (IO) analysis as applied to Melbourne, Australia. These approaches highlight different aspects of urban energy use and comparable outputs are presented together to assess consistency, to identify complementarities and discuss the insight each approach brings to understanding urban energy. The IO method captures the direct and embodied primary energy requirements of local household expenditure (235.8 GJ/capita/year) while the regional assessment more directly accounts for local production activity (258.1 GJ/capita/year). The parity of these results is unexpected for a developed city with a strong tertiary sector. Sectoral detail reveals differences between the primary energy required by Melbourne's economic structure and that ultimately required through the full supply chain relating to household expenditure. This is accompanied by an IO analysis of the geography of Melbourne's 'energy catchment'. It is suggested that the IO consumption and regional production approaches have particular relevance to policies aimed at consumption behaviour and economic, (re)structuring, respectively. Their complementarity further suggests that a combined analysis would be valuable in understanding urban energy futures and economic transitions elsewhere. Crown Copyright (C) 2011 Published by Elsevier Ltd. All rights reserved.

C1 [Baynes, Timothy] CSIRO, Ecosyst Sci Div, N Ryde, NSW 1670, Australia.

[Lenzen, Manfred] Univ Sydney, ISA, Sch Phys A28, Sydney, NSW 2006, Australia.

[Steinberger, Julia K.] Alpen Adria Univ, Inst Social Ecol, A-1070 Vienna, Austria.

[Steinberger, Julia K.] Univ Leeds, Sustainabil Res Inst, Sch Earth & Environm, Leeds LS2 9JT, W Yorkshire, England.

[Bai, Xuemei] Australian Natl Univ, Fenner Sch Environm & Soc, Canberra, ACT 0200, Australia.

RP Baynes, T (reprint author), CSIRO, Ecosyst Sci Div, POB 310, N Ryde, NSW 1670, Australia.

EM Tim.Baynes@csiro.au; m.lenzen@physics.usyd.edu.au;

j.k.steinberger@leeds.ac.uk; Xuemei.Bai@anu.edu.au

- RI Steinberger, Julia/B-3288-2011; Bai, Xuemei/A-5443-2012; Lenzen, Manfred/D-3161-2013; Baynes, Timothy/D-4738-2011; Bai, Xuemei/H-7072-2012; feng, tingting/A-9545-2012
- OI Steinberger, Julia/0000-0002-5925-9602; Bai, Xuemei/0000-0001-6556-8041; Baynes, Timothy/0000-0001-8416-3365; Lenzen, Manfred/0000-0002-0828-5288
- FU Global Energy Assessment; CSIRO; Australian Research Council [LP0347812]; SUME; European Community [212034]; GEA; College of Medicine, Biology and Environment at Australian National University
- FX Timothy Baynes was supported by the Global Energy Assessment and CSIRO's Urban Futures Project. The regional approach analysis was prepared as a technical paper for Global Energy Assessment. The algorithm used by Manfred Lenzen for regionalising the energy catchment was developed in the scope of Linkage Project LP0347812 funded by the Australian Research Council. Julia Steinberger acknowledges funding from the SUME project, European Community's Seventh Framework Programme FP7/2007-2013 under grant agreement 212034. Xuemei Bai was supported by GEA, the CSIRO Climate Adaptation Flagship, and a research fund from the College of Medicine, Biology and Environment at Australian National University. We thank Arnulf Grubler for the inspiration to conduct a methodological comparison, and Helga Weisz, Heinz Schandl and Steve Hatfield-Dodds for their critical input.
- CR ABARE, 2008, TABL C AUSTR CONS EN  
 ABARE, 2006, TABL F3 VICT EN CONS  
 ABARE, 2008, TABL L AUSTR PETR SU  
 ABARE, 2008, TABL G3 VICT EN CONS  
 ABARE, 2008, TABL B AUSTR CONS EN  
 ABARE, 2007, TABL F3 AUSTR EN CON  
 Bai XM, 2007, J IND ECOL, V11, P1, DOI 10.1162/jie.2007.1296  
 Banister D, 1997, ENVIRON PLANN B, V24, P125, DOI 10.1068/b240125  
 Baynes T., 2009, TRAJECTORIES CHANGE  
 BITRE ( Bureau of Infrastructure Transport and Regional Economics), 2008, AUSTR TRANSP STAT YB  
 BULLARD CW, 1975, P IEEE, V63, P484, DOI 10.1109/PROC.1975.9775  
 BULLARD CW, 1975, ENER POLICY, V3, P268, DOI 10.1016/0301-4215(75)90035-X  
 Chartered Institute of Wastes Management, 2002, RES FLOW EC FOOTPR A  
 Cohen C.A.M.J., 2005, ENER POLICY, V55, P555  
 Collins G., 2002, GUIDE PETROLEUM IND  
 Decker EH, 2000, ANNU REV ENER ENV, V25, P685, DOI 10.1146/annurev.energy.25.1.685  
 Dey C., 2007, WATER WIND ART DEBAT, P280  
 Dhakal S, 2009, ENER POLICY, V37, P4208, DOI 10.1016/j.enpol.2009.05.020  
 DPCD, 2005, CAR TRAV COND  
 ESAA, 2005, EL GAS AUSTR 2005  
 ESAA, 2002, EL AUSTR 2002  
 Casson B., 2002, P SAPI INT C PLANN A  
 Herendeen R., 1976, ENERGY, P165  
 HERENDEEN RA, 1981, ENERGY, V6, P1433, DOI 10.1016/0360-5442(81)90069-4  
 Hersey J., 2009, CAPITAL CONSUMPTION  
 Hertwich EG, 2009, ENVIRON SCI TECHNOL, V43, P6414, DOI 10.1021/es803496a  
 Hillman T, 2010, ENVIRON SCI TECHNOL, V44, P1902, DOI 10.1021/es9024194  
 Kennedy C, 2007, J IND ECOL, V11, P43, DOI 10.1162/jie.2007.1107  
 Kennedy C, 2010, ENER POLICY, V38, P4828, DOI 10.1016/j.enpol.2009.08.050  
 Kennedy C, 2009, ENVIRON SCI TECHNOL, V43, P7297, DOI 10.1021/es900213p  
 Kenway S.J., 2008, WATER ENERGY FUTURES  
 Lenzen M, 2006, ENERGY, V31, P181, DOI 10.1016/j.energy.2005.01.009  
 Lenzen M, 1998, ENERGY, V23, P497, DOI 10.1016/S0360-5442(98)00020-6  
 Lenzen M, 2004, ECOL ECON, V49, P375, DOI 10.1016/j.ecolecon.2004.01.019  
 Lenzen M, 1998, ENER POLICY, V26, P495, DOI 10.1016/S0301-4215(98)00012-3  
 Lenzen M, 1999, TRANSPORT RES D-TR E, V4, P265, DOI 10.1016/S1361-9209(99)00009-7  
 Lenzen M., 2010, 18 INT INP OUTP C SY

Lenzen M, 2008, URBAN ENERGY TRANSITION: FROM FOSSIL FUELS TO RENEWABLE POWER, P91,  
 DOI 10.1016/B978-0-08-045341-5.00004-9  
 Lenzen M, 2010, J IND ECOL, V14, P73, DOI 10.1111/j.1530-9290.2009.00190.x  
 Lin JY, 2010, ENER POLICY, V38, P5123, DOI 10.1016/j.enpol.2010.04.042  
 New York City, 2007, INV NEW YORK CIT GRE  
 MUNKSGAARD J, 2005, ENERGY ENV, V16, P283  
 Newman PW, 1996, HUMAN SETTLEMENTS AU  
 [OECD IEA], 2010, EN BAL OECD COUNTR  
 OECD/IEA, 2004, EN STAT MAN  
 Peters GP, 2008, ENVIRON SCI TECHNOL, V42, P1401, DOI 10.1021/es072023k  
 Ramaswami A, 2008, ENVIRON SCI TECHNOL, V42, P6455, DOI 10.1021/es702992q  
 Ramaswami A, 2011, ENVIRON SCI TECHNOL, V45, P4205, DOI 10.1021/es201166n  
 Rees W, 1996, ENVIRON IMPACT ASSES, V16, P223, DOI 10.1016/S0195-9255(96)00022-4  
 Refsgaard K, 1998, AGR SYST, V57, P599, DOI 10.1016/S0308-521X(98)00004-3  
 Rueda-Cantucho JM, 2009, ECON SYST RES, V21, P59, DOI 10.1080/09535310802703429  
 Shammin MR, 2010, ECOL ECON, V69, P2363, DOI 10.1016/j.ecolecon.2010.07.003  
 Troy P., 2003, URBAN POLICY RES, V21, P9  
 Tukker A, 2009, ECOL ECON, V68, P1928, DOI 10.1016/j.ecolecon.2008.11.010  
 UITP, 2006, MOB CIT DAT  
 International Association of Public Transport (UITP), 2006, MOB CIT DAT  
 USEIA, 2010, ANN EN REV 2009  
 Weisz H, 2010, CURR OPIN SUST, V2, P185, DOI 10.1016/j.cosust.2010.05.010  
 Wiedmann T, 2010, ECON SYST RES, V22, P19, DOI 10.1080/09535311003612591  
 NR 59  
 TC 41  
 Z9 42  
 U1 4  
 U2 32  
 PU ELSEVIER SCI LTD  
 PI OXFORD  
 PA THE BOULEVARD, LANGFORD LANE, KIDLINGTON, OXFORD OX5 1GB, OXON, ENGLAND  
 SN 0301-4215  
 EI 1873-6777  
 J9 ENER POLICY  
 JI Energy Policy  
 PD NOV  
 PY 2011  
 VL 39  
 IS 11  
 BP 7298  
 EP 7309  
 DI 10.1016/j.enpol.2011.08.053  
 PG 12  
 WC Economics; Energy & Fuels; Environmental Sciences; Environmental Studies  
 SC Business & Economics; Energy & Fuels; Environmental Sciences & Ecology  
 GA 862US  
 UT WOS:000298120200062  
 DA 2018-05-03  
 ER  
  
 PT J  
 AU Eom, J  
     Clarke, L  
     Kim, SH  
     Kyle, P  
     Patel, P  
 AF Eom, Jiyong  
     Clarke, Leon



Kim, Son H.

Kyle, Page

Patel, Pralit

TI China's building energy demand: Long-term implications from a detailed assessment

SO ENERGY

LA English

DT Article

DE China buildings; Building energy modeling; Scenario analysis; Integrated assessment model; Electrification

ID INTEGRATED ASSESSMENT; SCENARIOS; FUTURE; MODEL; TRANSPORTATION; TECHNOLOGIES; PROJECTIONS; FRAMEWORK

AB Buildings are an important contributor to China's energy consumption and attendant CO<sub>2</sub> emissions. Measures to address energy consumption and associated emissions from the buildings sector will be an important part of strategy to reduce the country's CO<sub>2</sub> emissions. This study presents a detailed, service-based model of China's building energy demand, nested in the GCAM (Global Change Assessment Model) integrated assessment framework. Using the model, we explored long-term pathways of China's building energy demand and identified opportunities to reduce greenhouse gas emissions. A range of different scenarios was also developed to gain insights into how China's building sector might evolve and what the implications might be for improved building energy technology and carbon policies. The analysis suggests that China's building energy growth will not wane anytime soon, although technology improvement will put downward pressure on this growth: In the reference scenarios, the sector's final energy demand will increase by 110–150% by 2050 and 160–220% by 2095 from its 2005 level. Also, regardless of the scenarios represented, the growth will involve the continued, rapid electrification of the buildings sector throughout the century, and this transition will be accelerated by the implementation of carbon policy. (C) 2012 Elsevier Ltd. All rights reserved.

C1 [Eom, Jiyong; Clarke, Leon; Kim, Son H.; Kyle, Page; Patel, Pralit] Pacific NW Natl Lab, Joint Global Change Res Inst, College Pk, MD 20740 USA.

RP Eom, J (reprint author), Pacific NW Natl Lab, Joint Global Change Res Inst, College Pk, MD 20740 USA.

EM jiyong.eom@pnl.gov

RI Eom, Jiyong/A-1161-2014

OI Eom, Jiyong/0000-0002-8092-5921

CR ANDERSON JG, 1987, J CONSUM AFF, V21, P1, DOI 10.1111/j.1745-6606.1987.tb00185.x

Bauen A., 2000, 1 WORLD C BIOM EN IN, P1354

Brockett D, 2002, P 2002 AM COUNC EN E, P12

CEG, 2008, CHIN EN DAT V7 0

Clarke L, 2007, SCENARIOS GREENHOUSE

CLARKE JF, 1993, ENERG ECON, V15, P123, DOI 10.1016/0140-9883(93)90031-L

Clarke L., 2008, CO<sub>2</sub> EMISSIONS MITIGA

CSY, 2009, CHIN STAT YB

Edmonds J, 2004, ENERG ECON, V26, P517, DOI 10.1016/j.eneco.2004.04.025

Edmonds J., 1985, GLOBAL ENERGY ASSESS

Edmonds J, 2006, ENVIRON ECON POLICY, V7, P175, DOI 10.1007/s10018-005-0111-1

Energy Information Administration (EIA), 2006, INT EN OUTL

Eom J, 2012, SCENARIOS FUTURE SOC

ERI, 2003, CHIN SUST EN FUT

Evans M., 2009, SHAPING ENERGY EFFIC

Grubler A, 2007, TECHNOL FORECAST SOC, V74, P980, DOI 10.1016/j.techfore.2006.05.023

Guertin C., 2003, DETERMINING DEMAND E

Henley A, 1997, OXFORD B ECON STAT, V59, P149, DOI 10.1111/1468-0084.00054

Hong TZ, 2009, ENERG BUILDINGS, V41, P426, DOI 10.1016/j.enbuild.2008.11.003

Kejuan Jiang, 2001, EVALUATION TECHNOLOG

\*IEA, 2007, EN BAL OECD NONOECD

Kim SH, 2006, ENERG J, P63

Krey V, 2012, ENERGY EC IN PRESS

Kyle P, 2010, ENERGY J, V31, P131

Lang SW, 2004, ENERG BUILDINGS, V36, P1191, DOI 10.1016/j.enbuild.2003.09.014

Larson ED, 2003, ENERG POLICY, V31, P1189, DOI 10.1016/S0301-4215(02)00171-4

Li J, 2008, ENER POLICY, V36, P1736, DOI 10.1016/j.enpol.2008.01.029  
 McFadden D, 1980, J BUS, V53, P513  
 Meyer A.S., 2008, CHINA DEV NATL HEAT  
 Swart R., 2000, SPECIAL REPORT EMISS  
 Odyssee, 2009, DAT EN EFF IND EUR  
 OECD, 2011, STAT PORT  
 O'Neill B, 2012, ENERGY EC IN PRESS  
 Sands RD, 2003, CLIMATIC CHANGE, V56, P185, DOI 10.1023/A:1021344614845  
 Sinton J, 2001, ACCURACY RELIABILITY  
 Tonooka Y, 2003, J ASIAN ARCHIT BUILD, V2, P93  
 Train K., 1993, QUALITATIVE CHOICE A  
 UNPD, 2009, WORLD URB PROSP  
 van Ruijven BJ, 2012, ENERGY, V38, P386, DOI 10.1016/j.energy.2011.11.037  
 van Ruijven BJ, 2011, ENER POLICY, V39, P7747, DOI 10.1016/j.enpol.2011.09.021  
 van Vliet O, 2012, ENERGY EC IN PRESS  
 Vuuren D, 2007, GLOBAL ENVIRON CHANG, V17, P114  
 Wan KKW, 2011, BUILD ENVIRON, V46, P223, DOI 10.1016/j.buildenv.2010.07.016  
 WEO, 2007, WORLD EN OUTL 2007 C  
 Wigley TML, 2002, J CLIMATE, V15, P2945, DOI 10.1175/1520-0442(2002)015<2945:RFLWPI>2.0.CO;2  
 Zhou N, 2007, ENERGY USE CHINA SEC  
 Zhou N, 2008, ENER BUILDINGS, V40, P2121, DOI 10.1016/j.enbuild.2008.06.009

NR 47

TC 40

Z9 40

U1 2

U2 18

PU PERGAMON-ELSEVIER SCIENCE LTD

PI OXFORD

PA THE BOULEVARD, LANGFORD LANE, KIDLINGTON, OXFORD OX5 1GB, ENGLAND

SN 0360-5442

J9 ENERGY

JI Energy

PD OCT

PY 2012

VL 46

IS 1

BP 405

EP 419

DI 10.1016/j.energy.2012.08.009

PG 15

WC Thermodynamics; Energy &amp; Fuels

SC Thermodynamics; Energy &amp; Fuels

GA 047XB

UT WOS:000311873700044

DA 2018-05-03

ER

PT J

AU Zhang, T

Siebers, PO

Aickelin, U

AF Zhang, Tao

Siebers, Peer-Olaf

Aickelin, Uwe

TI Modelling electricity consumption in office buildings: An agent based approach

SO ENERGY AND BUILDINGS

LA English

DT Article

DE Office energy consumption; Agent-based simulation; Energy management technologies; Energy management strategies

ID SIMULATION; DIFFUSION; BEHAVIOR; RETAIL

AB In this paper, we develop an agent-based model which integrates four important elements, i.e. organisational energy management policies/regulations, energy management technologies, electric appliances and equipment, and human behaviour, to simulate the electricity consumption in office buildings. Based on a case study, we use this model to test the effectiveness of different electricity management strategies, and solve practical office electricity consumption problems. This paper theoretically contributes to an integration of the four elements involved in the complex organisational issue of office electricity consumption, and practically contributes to an application of an agent-based approach for office building electricity consumption study. (C) 2011 Elsevier B.V. All rights reserved.

C1 [Zhang, Tao; Siebers, Peer-Olaf; Aickelin, Uwe] Univ Nottingham, Sch Comp Sci, Intelligent Modelling & Anal Grp, Nottingham NG8 1BB, England.

RP Zhang, T (reprint author), Univ Nottingham, Sch Comp Sci, Intelligent Modelling & Anal Grp, Nottingham NG8 1BB, England.

EM Tao.Zhang@nottingham.ac.uk

RI Aickelin, Uwe/J-4843-2012

OI Aickelin, Uwe/0000-0002-2679-2275; Siebers, Peer-Olaf/0000-0002-0603-5904

FU UK Engineering and Physical Sciences Research Council [EP/G05956X/1]

FX The research was sponsored by the UK Engineering and Physical Sciences Research Council (Grant Ref: EP/G05956X/1).

CR ANDERSSON B, 1987, BUILD ENVIRON, V22, P3, DOI 10.1016/0360-1323(87)90038-2  
Axtell R., 2000, P WORKSH AG SIM APPL, P3, DOI 10.1002/(SICI)1099-0526(199711/12)3:2<16:AID-CPLX4>3.0.CO;2-K

Azar E, 2010, WINT SIMUL C PROC, P3145, DOI 10.1109/WSC.2010.5679007

Bourgeois D, 2006, ENERGBUILDINGS, V38, P814, DOI 10.1016/j.enbuild.2006.03.002

Bunn DW, 2001, IEEE T EVOLUT COMPUT, V5, P493, DOI 10.1109/4235.956713

ERICKSON VL, 2009, P ACM BUILDSYS 2009

FARMER JD, 2009, NATURE, V406, P685

Firth S, 2008, ENERGBUILDINGS, V40, P926, DOI 10.1016/j.enbuild.2007.07.005

Galan JM, 2009, JASSS-J ARTIF SOC S, V12

GALASIU AM, 1995, P 1995 ILL ENG SOC N, P617

Hoes P, 2009, ENERGBUILDINGS, V41, P295, DOI 10.1016/j.enbuild.2008.09.008

Janssen MA, 2003, ARTIF LIFE, V9, P343, DOI 10.1162/106454603322694807

Janssen MA, 2002, J EVOL ECON, V12, P283, DOI 10.1007/s00191-002-0120-1

JANSSEN MA, 1999, J ARTIFICIAL SOC SOC, V2

JOHN RW, 1986, BUILD SERV ENG RES T, V7, P121

Love J. A., 1998, LIGHTING RES TECHNOL, V30, P45, DOI DOI 10.1177/096032719803000107

Mahdavi A, 2007, BAUPHYSIK, V29, P72, DOI 10.1002/bapi.200710013

Nicol J.F., 2001, P 7 INT IBPSA C RIO, V39, P1073

Reinhart CF, 2004, SOL ENERGY, V77, P15, DOI 10.1016/j.solener.2004.04.003

RIJAL NB, 2007, ENERGBUILDINGS, V39, P823

Russell Stuart J., 2003, ARTIFICIAL INTELLIGE

Siebers Peer-Olaf, 2009, International Journal of Simulation & Process Modelling, V5, P215, DOI 10.1504/IJSPM.2009.031096

Siebers PO, 2010, SIMUL-T SOC MOD SIM, V86, P5, DOI 10.1177/0037549708101575

Wilhite H, 1996, ENERGPOLICY, V24, P795, DOI 10.1016/0301-4215(96)00061-4

\*XJ TECHN, 2010, XJ TECHN OFF ANYLOGI

Zhang T, 2007, J BUS RES, V60, P912, DOI 10.1016/j.jbusres.2007.02.006

Zhang T, 2011, J PROD INNOVAT MANAG, V28, P169, DOI 10.1111/j.1540-5885.2011.00790.x

NR 27

TC 40

Z9 42

U1 1

U2 20

PU ELSEVIER SCIENCE SA

PI LAUSANNE  
 PA PO BOX 564, 1001 LAUSANNE, SWITZERLAND  
 SN 0378-7788  
 J9 ENERGBUILDINGS  
 JI Energy Build.  
 PD OCT  
 PY 2011  
 VL 43  
 IS 10  
 BP 2882  
 EP 2892  
 DI 10.1016/j.enbuild.2011.07.007  
 PG 11  
 WC Construction & Building Technology; Energy & Fuels; Engineering, Civil  
 SC Construction & Building Technology; Energy & Fuels; Engineering  
 GA 825QR  
 UT WOS:000295297700038  
 DA 2018-05-03  
 ER

PT J  
 AU Byun, J  
     Park, S  
 AF Byun, Jinsung  
     Park, Sehyun

TI Development of a Self-adapting Intelligent System for Building Energy  
 Saving and Context-aware Smart Services

SO IEEE TRANSACTIONS ON CONSUMER ELECTRONICS

LA English

DT Article

DE Self-adapting; pattern generation; intelligent sensor; adaptive  
 middleware; wireless sensor networks

ID NETWORKS

AB Recent advances in ubiquitous technologies facilitate context-aware systems which can offer situation-based services. Wireless sensor networks (WSNs) have become increasingly important in recent years due to their ability to monitor and manage situational information for various intelligent services in ubiquitous environments. However, existing energy management systems are not effectively implemented in home and building environments due to their architectural limitations, such as static system architecture and a finite battery lifetime. Therefore, in this paper, we propose a Self-adapting intelligent system used for providing building control and energy saving services in buildings. Our system consists of a gateway (self-adapting intelligent gateway) and a sensor (self-adapting intelligent sensor). In addition, we also propose an energy-efficiency self-clustering sensor network (ESSN) and a node type indicator based routing (NTIR) protocol that considers the requirements of WSNs, such as network lifetime and system resource management. In order to verify the efficiency of our system, we implemented our system in real test bed and conducted experiments. The results show that autonomous power saving using our system is approximately 16-24% depending on the number of SIS1.

C1 [Byun, Jinsung; Park, Sehyun] Chung Ang Univ, Sch Elect & Elect Engr, Seoul 156756, South Korea.

RP Park, S (reprint author), Chung Ang Univ, Sch Elect & Elect Engr, Seoul 156756, South Korea.

EM jinsung@wm.cau.ac.kr; shpark@cau.ac.kr

FU MKE(The Ministry of Knowledge Economy), Korea, under the HNRC(Home Network Research Center) ITRC(Information Technology Research Center) [NIPA-2010-C1090-1011-0010]; Korea government Ministry of Knowledge Economy [20104010100570]; Ministry of Knowledge Economy(MKE); Korea Institute for Advancement of Technology(KIAT) through the Research and Development for Regional Industry

FX This research was supported by the MKE(The Ministry of Knowledge Economy), Korea, under the HNRC(Home Network Research Center) ITRC(Information Technology Research Center) support program supervised

by the NIPA(National IT Industry Promotion Agency (NIPA-2010-C1090-1011-0010) and by the Human Resources Development of the Korea Institute of Energy Technology Evaluation and Planning (KETEP) grant funded by the Korea government Ministry of Knowledge Economy (20104010100570) and by the Ministry of Knowledge Economy(MKE) and Korea Institute for Advancement of Technology(KIAT) through the Research and Development for Regional Industry.

CR Cao XH, 2010, IEEE T IND ELECTRON, V57, P3596, DOI 10.1109/TIE.2009.2029585  
 Chonggang W., 2008, COMMUNICATIONS MAGAZ, V46, P121  
 Ferreira AA, 2008, IEEE T POWER ELECTR, V23, P107, DOI 10.1109/TPEL.2007.911799  
 Guangming S., 2008, CONSUMER ELECT IEEE, V54, P1110  
 Guangming S., 2007, CONSUMER ELECT IEEE, V53, P1434  
 Heinzelman WB, 2002, IEEE T WIREL COMMUN, V1, P660, DOI 10.1109/TWC.2002.804190  
 Hojin P., 2009, CONSUMER ELECT IEEE, V55, P1185  
 Hsiao-Yi H., 2004, AUTOMATION SCI ENG I, V1, P14  
 Hyunsuk C., 2009, CONSUMER ELECT IEEE, V55, P839  
 Krause A, 2006, IEEE T MOBILE COMPUT, V5, P113, DOI 10.1109/TMC.2006.18  
 Tompros S, 2009, IEEE NETWORK, V23, P8, DOI 10.1109/MNET.2009.5350347  
 Tzyy-Kuen T., 2005, DES AUT C 2005 P ASP, V2, P1010  
 Wan-Ki P., 2005, CONSUMER ELECT IEEE, V51, P485  
 Wan-Ki P., 2006, CONSUMER ELECT IEEE, V52, P110  
 Wheeler A, 2007, IEEE COMMUN MAG, V45, P70, DOI 10.1109/MCOM.2007.343615  
 YINGWEN B, 2008, CONSUMER ELECT IEEE, V54, P1173  
 Yoonsik U., 2010, CONSUMER ELECT IEEE, V56, P231  
 Youn-Kwae J., 2008, CONSUMER ELECT IEEE, V54, P487

NR 18

TC 40

Z9 40

U1 6

U2 32

PU IEEE-INST ELECTRICAL ELECTRONICS ENGINEERS INC

PI PISCATAWAY

PA 445 HOES LANE, PISCATAWAY, NJ 08855-4141 USA

SN 0098-3063

EI 1558-4127

J9 IEEE T CONSUM ELECTR

JI IEEE Trans. Consum. Electron.

PD FEB

PY 2011

VL 57

IS 1

BP 90

EP 98

DI 10.1109/TCE.2011.5735486

PG 9

WC Engineering, Electrical & Electronic; Telecommunications

SC Engineering; Telecommunications

GA 738XW

UT WOS:000288676900014

DA 2018-05-03

ER

PT J

AU Kim, H

Stump, A

Kim, W

AF Kim, Hyunjoo

Stump, Annette

Kim, Wooyoung

TI Analysis of an energy efficient building design through data mining approach

SO AUTOMATION IN CONSTRUCTION

LA English

DT Article

DE Energy simulation; Data mining; Classification; Factor selection; Energy design process

AB Incorporating energy efficiency and sustainable green design features into new/existing buildings has become a top priority in recent years for building owners, designers, contractors, and facility managers. This paper intends to address why delivery of an energy efficient building is not just the result of applying one or more isolated technologies. Rather, it can best be obtained using an integrated whole building process throughout the entire project development process, which leads building designers to generate a large amount of data during energy simulations. The authors observed that even a simple energy modeling run generated pages of data with many different variables. The volumes of energy modeling data clearly overwhelm traditional data analysis methods such as spreadsheets and ad-hoc queries with so many factors to be considered. An integrated or whole building design process involves studies of the energy-related impacts and interactions of all building components, including the building location, envelope (walls, windows, doors, and roof), heating, ventilation and air conditioning (HVAC) system, lighting, controls, and equipment, which shows why it is so difficult to find the correlation between different systems. The objective of this research is to develop an energy efficient building design process using data mining technology which can help project teams discover important patterns to improve the building design. This paper utilizes the data mining technology to extract interrelationships and patterns of interest from a large dataset Case study revealed that data mining based energy modeling help project teams discover useful patterns to improve the energy efficiency of building design during the design phase. The method developed during this research could be used to guide designers and engineers through the process of completing an early design energy analysis based on energy simulation models. (C) 2010 Elsevier B.V. All rights reserved.

C1 [Stump, Annette] USA, Corps Engineers, Engr Res & Dev Ctr, Washington, DC 20310 USA.

EM hykim@fullerton.edu; Annette.LStumpf@usace.army.mil;  
beladomo@cerik.re.kr

CR Abaza H., 2008, J GREEN BUILDING

Crawley D.B., 2005, CONTRASTING CAPABILI

Dahl P., 2005, CONSTR RES C

Domingos P., 1997, OPTIMALITY SIMPLE BA

Fayyad U, 1998, ADV KNOWLEDGE DISCOV

John G., 1996, CROSS VALIDATED C4 5

KIM H, 2009, 3 INT C CONSTR ENG M

Lam K. P., 2004, AUTOMATION CONSTRUCT, V13

QUINLAN R, 1993, C 4 5 PROGRAMS MACHI

NR 9

TC 40

Z9 40

U1 4

U2 46

PU ELSEVIER SCIENCE BV

PI AMSTERDAM

PA PO BOX 211, 1000 AE AMSTERDAM, NETHERLANDS

SN 0926-5805

J9 AUTOMAT CONSTR

JI Autom. Constr.

PD JAN

PY 2011

VL 20

IS 1

SI SI

BP 37

EP 43

DI 10.1016/j.autcon.2010.07.006

PG 7

WC Construction & Building Technology; Engineering, Civil

SC Construction & Building Technology; Engineering

GA 705KO

UT WOS:000286127500005

DA 2018-05-03

ER

PT J

AU Al-Ghandoor, A

Jaber, JO

Al-Hinti, I

Mansour, IM

AF Al-Ghandoor, A.

Jaber, J. O.

Al-Hinti, I.

Mansour, I. M.

TI Residential past and future energy consumption: Potential savings and environmental impact

SO RENEWABLE & SUSTAINABLE ENERGY REVIEWS

LA English

DT Review

DE Electricity; Fuel; GHG emissions; Multivariate regression; Jordan; Residential sector

ID EFFICIENCY STANDARD; ELECTRICITY CONSUMPTION; HOUSEHOLD REFRIGERATORS; NEURAL-NETWORKS; SECTOR; APPLIANCE; MALAYSIA; SPACE; IMPLEMENTATION; CONSERVATION

AB In order to identify main drivers behind changes in electricity and fuel consumptions in the household sector in Jordan, two empirical models are developed based on multivariate linear regression analysis. In addition, this paper analyzes and evaluates impacts of introducing some efficient measures, such as high efficiency lightings and solar water heating systems, in the housing stock, on the future fuel and electricity demands and associated reduction in GHG emissions. It was found that fuel unit price, income level, and population are the most important variables that affect demand on electrical power, while population is the most important variable in the case of fuel consumption. Obtained results proved that the multivariate linear regression models can be used adequately to simulate residential electricity and fuel consumptions with very high coefficient of determination. Without employing most effective energy conservation measures, electricity and fuel demands are expected to rise by approximately 100% and 23%, respectively within 10 years time. Consequently, associated GHG emissions resulting from activities within the residential sector are predicted to rise by 59% for the same period. However, if recommended energy management measures are implemented on a gradual basis, electricity and fuel consumptions as well as GHG emissions are forecasted to increase at a lower rate. (C) 2008 Elsevier Ltd. All rights reserved.

C1 [Al-Ghandoor, A.] Hashemite Univ, Dept Ind Engr, Zarqa, Jordan.

[Jaber, J. O.] Al Balqa Appl Univ, Fac Engr Technol, Amman, Jordan.

[Al-Hinti, I.] Hashemite Univ, Dept Mech Engr, Zarqa, Jordan.

[Mansour, I. M.] Univ Jordan, Dept Elect Engr, Amman, Jordan.

RP Al-Ghandoor, A (reprint author), Hashemite Univ, Dept Ind Engr, Zarqa, Jordan.

EM ghandoor@hu.edu.jo

RI Mansour, Ibrahim/A-1300-2011; Damra, Qatada/D-5574-2014

OI Mansour, Ibrahim/0000-0003-3657-202X;

CR Al-Ghandoor A, 2008, INT J EXERGY, V5, P413, DOI 10.1504/IJEX.2008.019113

Al-Ghandoor A, 2008, ENER POLICY, V36, P258, DOI 10.1016/j.enpol.2007.09.020

Al-Hinti I, 2007, ENER POLICY, V35, P5003, DOI 10.1016/j.enpol.2007.04.024

ALGHANDOOR A, 2005, P 2005 ACEEE SUMM ST

Aunan K, 2004, ENER POLICY, V32, P567, DOI 10.1016/S0301-4215(03)00156-3

Aydinalp M, 2004, APPL ENER, V79, P159, DOI 10.1016/j.apenergy.2003.12.006

Aydinalp M, 2003, INT J ENER RES, V27, P441, DOI 10.1002/er.887

Aydinalp M, 2002, APPL ENER, V71, P87, DOI 10.1016/S0306-2619(01)00049-6

Balaras CA, 2000, ENER G BUILDINGS, V31, P143, DOI 10.1016/S0378-7788(99)00028-6  
 \*CBJ, 2008, GROSS DOM PROD GDP  
 \*CBJ, 2008, CONS PRIC IND  
 Claycombe W., 1977, FUNDAMENTAL FORECAST  
 Dincer I, 1996, APPL ENER G, V53, P283, DOI 10.1016/0306-2619(95)00023-2  
 \*DOS, 2008, POP  
 \*DOS, 2005, POP HOUS CENS  
 Flores CE, 2004, INT J ENER G RES, V28, P641, DOI 10.1002/er.989  
 \*GEN SECR NAT POP, 2006, NAT POP STRAT  
 HIRST E, 1985, ENER G EC JAN, P20  
 IEA, 2006, KEY WORLD EN STAT  
 Jaber JO, 2004, ENER G POLICY, V32, P357, DOI 10.1016/S0301-4215(02)00297-5  
 Jaber JO, 2002, ENER G BUILDINGS, V34, P311, DOI 10.1016/S0378-7788(01)00118-9  
 Jaber JO, 2002, ENER G POLICY, V30, P385, DOI 10.1016/S0301-4215(01)00105-7  
 Jaber JO, 2008, RENEW SUST ENER G REV, V12, P287  
 \*JISM, 2007, 17492007 JISM JS  
 \*JISM, 2007, 177232007 JISM JS  
 Lu W, 2006, ENER G POLICY, V34, P1583, DOI 10.1016/j.enpol.2004.12.012  
 Mahlia TMI, 2003, ENER GY, V28, P751, DOI 10.1016/S0360-5442(02)00190-1  
 Mahlia TMI, 2001, ENER G CONVERS MANAGE, V42, P1673, DOI 10.1016/S0196-8904(00)00161-8  
 Makridakis S., 1983, FORECASTING METHODS  
 Markis T, 2007, ENER G BUILDINGS, V39, P404, DOI 10.1016/j.enbuild.2006.08.006  
 Mayer LS, 1977, ENER G BUILDINGS, V1, P301  
 \*MD, 2008, CLIM DAT  
 \*MEMR, 2008, EL FIN EN CONS JORD  
 \*MEMR, 2007, ANN REP 2006 MIN EN  
 \*MEMR, 2008, COST CONS EN  
 \*MEMR, 2008, GEN IND  
 Mihalakakou G, 2002, ENER G BUILDINGS, V34, P727, DOI 10.1016/S0378-7788(01)00137-2  
 MONTEGOMERY D, 2007, APPL STAT PROBABILIT  
 \*NEPCO, 2007, ANN REP 2006 NAT EL  
 Ozturk HK, 2004, ENER G BUILDINGS, V36, P175, DOI 10.1016/j.enbuild.2003.11.001  
 PARTI M, 1980, BELL J ECON, V11, P309, DOI 10.2307/3003415  
 Siller T, 2007, ENER G POLICY, V35, P529, DOI 10.1016/j.enpol.2005.12.021  
 Ugursal VI, 1996, ENER G BUILDINGS, V24, P137  
 Varman M, 2005, ENER G BUILDINGS, V37, P685, DOI 10.1016/j.enbuild.2004.10.001  
 \*WAJ, 2007, ANN REP 2006 WAT AUT  
 \*WEC, 2005, WEC MEMB COUNTR NAT  
 NR 46  
 TC 40  
 Z9 41  
 U1 0  
 U2 16  
 PU PERGAMON-ELSEVIER SCIENCE LTD  
 PI OXFORD  
 PA THE BOULEVARD, LANGFORD LANE, KIDLINGTON, OXFORD OX5 1GB, ENGLAND  
 SN 1364-0321  
 J9 RENEW SUST ENER G REV  
 JI Renew. Sust. Energ. Rev.  
 PD AUG-SEP  
 PY 2009  
 VL 13  
 IS 6-7  
 BP 1262  
 EP 1274  
 DI 10.1016/j.rser.2008.09.008  
 PG 13  
 WC GREEN & SUSTAINABLE SCIENCE & TECHNOLOGY; Energy & Fuels



SC Science & Technology - Other Topics; Energy & Fuels

GA 444ZL

UT WOS:000266019300006

DA 2018-05-03

ER

PT J

AU Dianshu, F

Sovacool, BK

Vu, KM

AF Dianshu, Feng

Sovacool, Benjamin K.

Vu, Khuong Minh

TI The barriers to energy efficiency in China: Assessing household electricity savings and consumer behavior in Liaoning Province

SO ENERGY POLICY

LA English

DT Article

DE Liaoning Province; Energy efficiency; Household electricity consumption

ID CONSERVATION; CONSUMPTION; ENVIRONMENT; EMISSIONS

AB This article investigates the barriers to energy efficiency at the residential sector within one province in China and explores patterns of household electricity consumption. The article presents the results of a survey questionnaire distributed to more than 600 households in Liaoning Province, field research at various Liaoning government agencies, and research interviews of Liaoning government officials to determine the efficacy of their energy efficiency efforts in China. It then investigates the extent that electricity consumers have taken advantage of energy efficiency opportunities relating to more efficient lights, water heaters, appliances, air-conditioners and heaters, and better energy-efficiency labels. The article also assesses the degree that electricity users have become more aware about electricity prices and their levels of consumption, and touches on the connection between rising levels of income and electricity use. It concludes by providing recommendations for how to improve efforts to promote conservation and reduce electricity load growth in Liaoning Province and beyond. (C) 2009 Elsevier Ltd. All rights reserved.

C1 [Dianshu, Feng; Sovacool, Benjamin K.; Vu, Khuong Minh] Natl Univ Singapore, Ctr Asia & Globalisat, Lee Kuan Yew Sch Publ Policy, Singapore 259772, Singapore.

RP Sovacool, BK (reprint author), Natl Univ Singapore, Ctr Asia & Globalisat, Lee Kuan Yew Sch Publ Policy, Oei Tiong Ham Bldg, 469C Bukit Timah Rd, Singapore 259772, Singapore.

EM dianshu@nus.edu.sg; bsovacool@nus.edu.sg; sppkmv@nus.edu.sg

OI VU, Khuong/0000-0001-9807-7003; Sovacool, Benjamin/0000-0002-4794-9403

CR Bjornstad D. J., 2004, MARKET FAILURES FRAM

BROWN MA, 1993, ENER POLICY, V21, P391, DOI 10.1016/0301-4215(93)90279-0

Brown MA, 2001, ENER POLICY, V29, P1197, DOI 10.1016/S0301-4215(01)00067-2

Crompton P, 2005, ENER ECON, V27, P195, DOI 10.1016/j.eneco.2004.10.006

Gielen D, 2001, ECOL ECON, V39, P257, DOI 10.1016/S0921-8009(01)00206-3

He JK, 2006, ENER POLICY, V34, P3702, DOI 10.1016/j.enpol.2004.10.014

JAFFE AB, 1994, RESOUR ENERGY ECON, V16, P91, DOI 10.1016/0928-7655(94)90001-9

KEMPTON W, 1994, ENER POLICY, V22, P857, DOI 10.1016/0301-4215(94)90145-7

KEMPTON W, 1994, P 1994 ACEEE SUMM ST

Li J, 2009, J ENVIRON MANAGE, V90, P2436, DOI 10.1016/j.jenvman.2008.12.015

Lu W, 2006, ENER POLICY, V34, P1583, DOI 10.1016/j.enpol.2004.12.012

Lu W, 2007, ENER POLICY, V35, P1709, DOI 10.1016/j.enpol.2006.05.012

LUTZENHISER L, 1992, ENERGY, V17, P47, DOI 10.1016/0360-5442(92)90032-U

Min GF, 1997, ENER POLICY, V25, P77, DOI 10.1016/S0301-4215(96)00070-5

Price L, 2002, ENERGY, V27, P429, DOI 10.1016/S0360-5442(01)00095-0

Sovacool BK, 2009, ENER POLICY, V37, P1529, DOI 10.1016/j.enpol.2008.12.016

SOVACOOL BK, 2010, DRAGON TIGER CUBS

Speed PA, 2009, ENER POLICY, V37, P1331

STERN PC, 1993, SCIENCE, V260, P1897, DOI 10.1126/science.260.5116.1897

STERN PC, 1986, J POLICY ANAL MANAG, V5, P200, DOI 10.2307/3323541

WILHITE H, 2000, SOC BEHAV CLIMATE CH, P109

Yang M, 2008, ENERG POLICY, V36, P561, DOI 10.1016/j.enpol.2007.09.032  
 NR 22  
 TC 39  
 Z9 39  
 U1 2  
 U2 20  
 PU ELSEVIER SCI LTD  
 PI OXFORD  
 PA THE BOULEVARD, LANGFORD LANE, KIDLINGTON, OXFORD OX5 1GB, OXON, ENGLAND  
 SN 0301-4215  
 EI 1873-6777  
 J9 ENERG POLICY  
 JI Energy Policy  
 PD FEB  
 PY 2010  
 VL 38  
 IS 2  
 BP 1202  
 EP 1209  
 DI 10.1016/j.enpol.2009.11.012  
 PG 8  
 WC Economics; Energy & Fuels; Environmental Sciences; Environmental Studies  
 SC Business & Economics; Energy & Fuels; Environmental Sciences & Ecology  
 GA 548SD  
 UT WOS:000273985700055  
 DA 2018-05-03  
 ER

PT J  
 AU Frederiks, ER  
   Stenner, K  
   Hobman, EV  
 AF Frederiks, Elisha R.  
   Stenner, Karen  
   Hobman, Elizabeth V.

TI The Socio-Demographic and Psychological Predictors of Residential Energy  
 Consumption: A Comprehensive Review

SO ENERGIES  
 LA English  
 DT Review  
 DE review; energy consumption; energy conservation; household energy use;  
 pro-environmental behavior; psychology; motivation; behavior change

ID PRO-ENVIRONMENTAL BEHAVIOR; FAMILY-LIFE CYCLE; CONSERVATION PROGRAMS;  
 CONSUMER-BEHAVIOR; MOTIVATION THEORY; PLANNED BEHAVIOR; DECISION-MAKING;  
 HUMAN-VALUES; DETERMINANTS; PATTERNS

AB This article provides a comprehensive review of theory and research on the individual-level predictors of household energy usage. Drawing on literature from across the social sciences, we examine two broad categories of variables that have been identified as potentially important for explaining variability in energy consumption and conservation: socio-demographic factors (e. g., income, employment status, dwelling type/size, home ownership, household size, stage of family life cycle) and psychological factors (e. g., beliefs and attitudes, motives and intentions, perceived behavioral control, cost-benefit appraisals, personal and social norms). Despite an expanding literature, we find that empirical evidence of the impact of these variables has been far from consistent and conclusive to date. Such inconsistency poses challenges for drawing generalizable conclusions, and underscores the complexity of consumer behavior in this domain. In this article, we propose that a multitude of factors-whether directly, indirectly, or in interaction-influence how householders consume and conserve energy. Theory, research and practice can be greatly advanced by understanding what these factors are, and how, when, where, why and for whom

they operate. We conclude by outlining some important practical implications for policymakers and directions for future research.

C1 [Frederiks, Elisha R.; Stenner, Karen; Hobman, Elizabeth V.] CSIRO Adapt Social & Econ Syst, Ecosci Precinct, Dutton Pk, Qld 4102, Australia.

RP Frederiks, ER (reprint author), CSIRO Adapt Social & Econ Syst, Ecosci Precinct, 41 Boggo Rd, Dutton Pk, Qld 4102, Australia.

EM elisha.frederiks@csiro.au; karen.stenner@csiro.au;

elizabeth.v.hobman@csiro.au

RI Hobman, Elizabeth/K-3125-2014; Frederiks, Elisha/L-1537-2014

OI Hobman, Elizabeth/0000-0002-2011-7279; Frederiks,

Elisha/0000-0002-2262-5277

CR Abrahamse W, 2005, J ENVIRON PSYCHOL, V25, P273, DOI 10.1016/j.jenvp.2005.08.002

Abrahamse W, 2011, HUM ECOL REV, V18, P30

Abrahamse W, 2009, J ECON PSYCHOL, V30, P711, DOI 10.1016/j.joep.2009.05.006

AJZEN I, 1991, ORGAN BEHAV HUM DEC, V50, P179, DOI 10.1016/0749-5978(91)90020-T

Ajzen I., 1985, ACTION CONTROL COGNI, V2, P11, DOI [DOI 10.1007/978-3-642-69746-3\_2, 10.1007/978-3-642-69746-3\_2]

Allcott H, 2010, BEHAV SCI ENERGY POL

Allcott H., 2012, 18373 NBER

Allcott H, 2011, J PUBLIC ECON, V95, P1082, DOI 10.1016/j.jpubeco.2011.03.003

Anker-Nilssen P, 2003, APPL ENERG, V76, P189, DOI 10.1016/S0306-2619(03)00056-4

Ayres I., 2009, 15386 NBER

Bamberg S, 2007, J ENVIRON PSYCHOL, V27, P14, DOI 10.1016/j.jenvp.2006.12.002

Barr S, 2005, ENERG POLICY, V33, P1425, DOI 10.1016/j.enpol.2003.12.016

Baumeister R. F., 2004, HDB SELF REGULATION

BECKER LJ, 1981, ENVIRON BEHAV, V13, P590, DOI 10.1177/0013916581135004

Benders RMT, 2006, ENERG POLICY, V34, P3612, DOI 10.1016/j.enpol.2005.08.005

Biesiot W, 1999, ECOL ECON, V28, P367, DOI 10.1016/S0921-8009(98)00113-X

BLACK JS, 1985, J APPL PSYCHOL, V70, P3, DOI 10.1037//0021-9010.70.1.3

Blake J, 1999, INT J JUSTICE SUSTAI, V4, P257

Boulstridge E., 2000, J COMMUNICATION MANA, V4, P355, DOI DOI 10.1108/EB023532

Brandon G, 1999, J ENVIRON PSYCHOL, V19, P75, DOI 10.1006/jevp.1998.0105

Bruni CM, 2010, J ENVIRON PSYCHOL, V30, P95, DOI 10.1016/j.jenvp.2009.10.004

Camerer CF, 2004, ROUNDTABLE SER BEHAV, P1

Carver C. S, 2001, SELF REGULATION BEHA

Cialdini R., 2003, INFLUENCE SCI PRACTI

Cialdini RB, 2003, CURR DIR PSYCHOL SCI, V12, P105, DOI 10.1111/1467-8721.01242

CIALDINI RB, 1991, ADV EXP SOC PSYCHOL, V24, P201, DOI 10.1016/S0065-2601(08)60330-5

Gilbert D., 1998, HDB SOCIAL PSYCHOL, VII, P151

Clancy J., 2003, ENERGY SUSTAIN DEV, V7, P44, DOI DOI 10.1016/S0973-0826(08)60364-6

Clark CF, 2003, J ENVIRON PSYCHOL, V23, P237, DOI 10.1016/S0272-4944(03)00105-6

COOK SW, 1981, J SOC ISSUES, V37, P73, DOI 10.1111/j.1540-4560.1981.tb02627.x

Costa D. L., 2010, 15939 NBER

COSTANZO M, 1986, AM PSYCHOL, V41, P521, DOI 10.1037/0003-066X.41.5.521

Courtenay-Hall P., 2002, ENVIRON EDUC RES, V8, DOI [10.1080/13504620220145438, DOI 10.1080/13504620220145438]

Cunningham W.H., 1978, ADV CONSUM RES, V5, P201

CURTIN RT, 1976, J ENERGY DEV, V2, P38

CURTIS FA, 1984, ENERG POLICY, V12, P452, DOI 10.1016/0301-4215(84)90109-5

DARLEY JM, 1981, J SOC ISSUES, V37, P150, DOI 10.1111/j.1540-4560.1981.tb02630.x

DARLEY JM, 1978, ENERG BUILDINGS, V1, P339, DOI 10.1016/0378-7788(78)90013-0

De Young R, 2000, J SOC ISSUES, V56, P509, DOI 10.1111/0022-4537.00181

Deci EL, 1985, INTRINSIC MOTIVATION

desGroot J. I. M., 2007, ENVIRON BEHAV, V40, P330, DOI DOI 10.1177/0013916506297831

Dieperink C, 2004, ENERG POLICY, V32, P773, DOI 10.1016/S0301-4215(02)00341-5

EAGLY AH, 1998, HDB SOCIAL PSYCHOL, V1, P269

Eccles JS, 2002, ANNU REV PSYCHOL, V53, P109, DOI 10.1146/annurev.psych.53.100901.135153

Ellegard K, 2011, APPL ENERG, V88, P1920, DOI 10.1016/j.apenergy.2010.11.019

- Faiers A, 2007, ENER POLICY, V35, P4381, DOI 10.1016/j.enpol.2007.01.003
- FELDMAN DC, 1984, ACAD MANAGE REV, V9, P47, DOI 10.2307/258231
- Fishbein M., 1975, BELIEF ATTITUDE INTE
- Flynn R, 2010, SOCIOL REV MONOGR, P159
- Frederiks ER, 2015, RENEW SUST ENER REV, V41, P1385, DOI 10.1016/j.rser.2014.09.026
- FREY CJ, 1983, ADV CONSUM RES, V10, P641
- FRITZSCHE DJ, 1981, J MARKETING RES, V18, P227, DOI 10.2307/3150956
- Gardner G. T., 2002, ENV PROBLEMS HUMAN B
- Gaspar R, 2011, ENER POLICY, V39, P7335, DOI 10.1016/j.enpol.2011.08.057
- Gatersleben B, 2002, ENVIRON BEHAV, V34, P335, DOI 10.1177/0013916502034003004
- GELLER ES, 1981, J CONSUM RES, V8, P331, DOI 10.1086/208872
- Geller E.S., 2002, HDB ENV PSYCHOL, P525
- Geller ES, 1990, HLTH ED RES THEORY P, V5, P125
- Gram-Hanssen K, 2014, ARCHIT ENG DES MANAG, V10, P91, DOI 10.1080/17452007.2013.837251
- Gram-Hanssen K, 2010, BUILD RES INF, V38, P175, DOI 10.1080/09613210903541527
- GUAGNANO GA, 1995, ENVIRON BEHAV, V27, P699, DOI 10.1177/0013916595275005
- Hagerstrand, 1976, GEOFORUM, V7, P329, DOI [10.1016/0016-7185(76)90063-4, DOI 10.1016/0016-7185(76)90063-4]
- Hagerstrand T., 1970, PAPERS REGIONAL SCI, V24, P6, DOI [DOI 10.1007/BF01936872, 10.1007/BF01936872]
- Harland P, 1999, J APPL SOC PSYCHOL, V29, P2505, DOI 10.1111/j.1559-1816.1999.tb00123.x
- HARTMAN RS, 1986, APPL ECON, V18, P1, DOI 10.1080/00036848600000010
- Herberlein T. A., 1983, J ECON PSYCHOL, V4, P107, DOI [10.1016/0167-4870(83)90021-1, DOI 10.1016/0167-4870(83)90021-1]
- Hines J., 1987, J ENVIRON EDUC, V18, P1, DOI DOI 10.1080/00958964.1987.9943482
- Holloway D., 2006, URBAN POLICY RES, V24, P115, DOI [10.1080/08111140600591096, DOI 10.1080/08111140600591096]
- Huddart E, 2009, HUM ECOL REV, V16, P151
- HUMMEL CF, 1978, ENVIRON BEHAV, V10, P37, DOI 10.1177/0013916578101003
- KAHNEMAN D, 1984, AM PSYCHOL, V39, P341, DOI 10.1037/0003-066X.39.4.341
- Kahneman D, 2003, AM ECON REV, V93, P1449, DOI 10.1257/000282803322655392
- Kallgren CA, 2000, PERS SOC PSYCHOL B, V26, P1002, DOI 10.1177/01461672002610009
- Katzev R. D., 1987, PROMOTING ENERGY CON
- Kennedy T, 2004, ACAD MED, V79, P386, DOI 10.1097/00001888-200405000-00006
- Kolmuss A., 2002, ENVIRON EDUC RES, V8, P239, DOI DOI 10.1080/13504620220145401
- Latham G., 2007, WORK MOTIVATION HIST
- Latham GP, 2005, ANNU REV PSYCHOL, V56, P485, DOI 10.1146/annurev.psych.55.090902.142105
- Lindenberg S, 2001, KYKLOS, V54, P317
- Lindenberg S., 2006, SOLIDARITY PROSOCIAL, P23
- Lindenberg S., 2001, HDB SOCIOLOGICAL THE, P635
- Lindenberg S, 2007, J SOC ISSUES, V63, P117, DOI 10.1111/j.1540-4560.2007.00499.x
- Locke EA, 2004, ACAD MANAGE REV, V29, P388
- Locke EA, 2002, AM PSYCHOL, V57, P705, DOI 10.1037//0003-066X.57.9.705
- Locke EA, 2006, CURR DIR PSYCHOL SCI, V15, P265, DOI 10.1111/j.1467-8721.2006.00449.x
- LOEWENSTEIN G, 1989, J ECON PERSPECT, V3, P181, DOI 10.1257/jep.3.4.181
- LUTZENHISER L, 1993, ANNU REV ENER ENV, V18, P247, DOI 10.1146/annurev.energy.18.1.247
- Mahapatra K, 2008, ENER POLICY, V36, P577, DOI 10.1016/j.enpol.2007.10.006
- Mayer PC, 1996, CONTEMP ECON POLICY, V14, P116, DOI 10.1111/j.1465-7287.1996.tb00608.x
- McMakin AH, 2002, ENVIRON BEHAV, V34, P848, DOI 10.1177/001391602237252
- MIDDEN CJH, 1983, J ECON PSYCHOL, V4, P37, DOI 10.1016/0167-4870(83)90017-X
- MURPHY PE, 1979, J CONSUM RES, V6, P12, DOI 10.1086/208744
- Nair G, 2010, ENER POLICY, V38, P2956, DOI 10.1016/j.enpol.2010.01.033
- Nolan JM, 2008, PERS SOC PSYCHOL B, V34, P913, DOI 10.1177/0146167208316691
- O'Neill BC, 2002, POPUL DEV REV, V28, P53
- OLSEN ME, 1983, J ECON PSYCHOL, V4, P183, DOI 10.1016/0167-4870(83)90052-1
- Oparaocha S, 2011, CURR OPIN ENV SUST, V3, P265, DOI 10.1016/j.cosust.2011.07.003
- Osbaldiston R, 2012, ENVIRON BEHAV, V44, P257, DOI 10.1177/0013916511402673
- PAINTER J, 1983, J ECON PSYCHOL, V3, P317, DOI 10.1016/0167-4870(83)90009-0

- Palm J, 2011, INT J CONSUM STUD, V35, P171, DOI 10.1111/j.1470-6431.2010.00974.x
- Pedersen Marc, 2008, P 2008 ACEEE SUMM ST, V7, P229
- Pelletier L. G., 2002, HDB SELF DETERMINATI, P205
- Pelletier LG, 2008, CAN PSYCHOL, V49, P210, DOI 10.1037/a0012755
- Pesendorfer W, 2006, J ECON LIT, V44, P712, DOI 10.1257/jel.44.3.712
- Pollitt M.G., 2013, HDB ENERGY CLIMATE C, P523
- Poortinga W, 2004, ENVIRON BEHAV, V36, P70, DOI 10.1177/0013916503251466
- Poortinga W, 2003, J ECON PSYCHOL, V24, P49, DOI 10.1016/S0167-4870(02)00154-X
- Powers T. L., 1992, J MACROMARKETING, V12, P5, DOI DOI 10.1177/027614679201200202
- Rehdanz K, 2007, ENERG ECON, V29, P167, DOI 10.1016/j.eneco.2006.04.002
- RITCHIE B, 1981, J CONSUM RES, V8, P233
- Rogers E., 2003, DIFFUSION INNOVATION
- Rogers EM, 1962, DIFFUSION INNOVATION
- ROSSON PJ, 1981, ENERG POLICY, V9, P216, DOI 10.1016/0301-4215(81)90077-X
- SAMUELSON CD, 1991, J APPL SOC PSYCHOL, V21, P549, DOI 10.1111/j.1559-1816.1991.tb00536.x
- Santin OG, 2011, ENERG BUILDINGS, V43, P2662, DOI 10.1016/j.enbuild.2011.06.024
- Sardianou E, 2007, ENERG POLICY, V35, P3778, DOI 10.1016/j.enpol.2007.01.020
- Schatzki T., 1996, SOCIAL PRACTICES WIT
- SCHIPPER L, 1989, ANNU REV ENERGY, V14, P273, DOI 10.1146/annurev.eg.14.110189.001421
- Schultz PW, 2014, EUR PSYCHOL, V19, P107, DOI 10.1027/1016-9040/a000163
- Schultz PW, 2001, J ENVIRON PSYCHOL, V21, P327
- Schultz PW, 2000, J SOC ISSUES, V56, P391, DOI 10.1111/0022-4537.00174
- Schultz P. W., 2003, HUMAN ECOLOGY REV, V10, P126
- SCHWARTZ SH, 1994, J SOC ISSUES, V50, P19, DOI 10.1111/j.1540-4560.1994.tb01196.x
- SCHWARTZ SH, 1987, J PERS SOC PSYCHOL, V53, P550, DOI 10.1037/0022-3514.53.3.550
- Schwartz S. H., 1992, UNIVERSALS CONTENT S, V25
- Schwartz S. H., 1977, ADV EXPT SOCIAL PSYC, V10, P221, DOI [DOI 10.1016/S0065-2601(08)60358-5, 10.1016/S0065-2601(08)60358-5]
- SELIGMAN C, 1978, ENERG BUILDINGS, V1, P325, DOI 10.1016/0378-7788(78)90012-9
- SELIGMAN C, 1979, J APPL SOC PSYCHOL, V9, P70, DOI 10.1111/j.1559-1816.1979.tb00795.x
- Semenza JC, 2008, AM J PREV MED, V35, P479, DOI 10.1016/j.amepre.2008.08.020
- Sheeran P, 2003, PERS SOC PSYCHOL B, V29, P205, DOI 10.1177/0146167202239046
- SHEERAN P, 2002, EUROPEAN REV SOCIAL, V12, P1, DOI DOI 10.1080/14792772143000003
- Sligo FX, 2000, J AM SOC INFORM SCI, V51, P858, DOI 10.1002/(SICI)1097-4571(2000)51:9<858::AID-ASI80>3.0.CO;2-Q
- Sovacool BK, 2014, NATURE, V511, P529, DOI 10.1038/511529a
- Splash C., 2006, LAND ECON, V82, P602
- Staats HJ, 1996, J ENVIRON MANAGE, V46, P189, DOI 10.1006/jema.1996.0015
- Steel P, 2006, ACAD MANAGE REV, V31, P889, DOI 10.5465/AMR.2006.22527462
- Steg L, 2009, J ENVIRON PSYCHOL, V29, P309, DOI 10.1016/j.jenvp.2008.10.004
- Stern PC, 2000, J SOC ISSUES, V56, P407, DOI 10.1111/0022-4537.00175
- STERN PC, 1993, ENVIRON BEHAV, V25, P322, DOI 10.1177/0013916593255002
- STERN PC, 1981, AM PSYCHOL, V36, P329, DOI 10.1037/0003-066X.36.4.329
- STERN PC, 1992, ANNU REV PSYCHOL, V43, P269, DOI 10.1146/annurev.ps.43.020192.001413
- STERN PC, 1992, AM PSYCHOL, V47, P1224, DOI 10.1037//0003-066X.47.10.1224
- STERN PC, 1994, J SOC ISSUES, V50, P65, DOI 10.1111/j.1540-4560.1994.tb02420.x
- Stern PC, 1999, J CONSUM POLICY, V22, P461, DOI DOI 10.1023/A:1006211709570
- Stern P, 1987, HDB ENV PSYCHOL, P1043
- Stern P. C., 1999, HUMAN ECOLOGY REV, V6, P81, DOI DOI 10.2307/2083693
- THALER R, 1980, J ECON BEHAV ORGAN, V1, P39, DOI 10.1016/0167-2681(80)90051-7
- THALER R, 1981, ECON LETT, V8, P201, DOI 10.1016/0165-1765(81)90067-7
- TONN B, 1986, ENERGY, V11, P785, DOI 10.1016/0360-5442(86)90017-4
- Turner J. C, 1991, SOCIAL INFLUENCE
- van den Bergh JCM, 2008, ECOL ECON, V66, P559, DOI 10.1016/j.ecolecon.2008.04.007
- VANRAAIJ WF, 1983, J ECON PSYCHOL, V3, P39, DOI 10.1016/0167-4870(83)90057-0
- VANRAAIJ WF, 1983, J ECON PSYCHOL, V4, P85, DOI 10.1016/0167-4870(83)90047-8
- VERHAGE BJ, 1980, EUR J MARKETING, V14, P167, DOI 10.1108/EUM00000000004898
- Verhallen M.M., 1981, J CONSUM RES, V8, P253

Vining J., 2002, HDB ENV PSYCHOL, P541  
 WALSH MJ, 1989, ENERG ECON, V11, P275, DOI 10.1016/0140-9883(89)90043-1  
 Wapner S., 2000, THEORETICAL PERSPECT  
 Webb TL, 2006, PSYCHOL BULL, V132, P249, DOI 10.1037/0033-2909.132.2.249  
 Weiner B., 1992, HUMAN MOTIVATION MET  
 WELLS WD, 1966, J MARKETING RES, V3, P355, DOI 10.2307/3149851  
 Wiidegren Orjan, 1998, ENVIRON BEHAV, V30, P75, DOI DOI 10.1177/0013916598301004  
 Wilson C, 2007, ANNU REV ENV RESOUR, V32, P169, DOI 10.1146/annurev.energy.32.053006.141137  
 WINKLER RC, 1982, AM PSYCHOL, V37, P421, DOI 10.1037//0003-066X.37.4.421  
 YATES SM, 1983, AM PSYCHOL, V38, P435, DOI 10.1037/0003-066X.38.4.435  
 Zelezny LC, 2000, J SOC ISSUES, V56, P443, DOI 10.1111/0022-4537.00177

NR 166

TC 38

Z9 38

U1 6

U2 61

PU MDPI AG

PI BASEL

PA POSTFACH, CH-4005 BASEL, SWITZERLAND

SN 1996-1073

J9 ENERGIES

JI Energies

PD JAN

PY 2015

VL 8

IS 1

BP 573

EP 609

DI 10.3390/en8010573

PG 37

WC Energy & Fuels

SC Energy & Fuels

GA AZ7MU

UT WOS:000348403800027

OA gold

DA 2018-05-03

ER

PT J

AU Muratori, M

Schuelke-Leech, BA

Rizzoni, G

AF Muratori, Matteo

Schuelke-Leech, Beth-Anne

Rizzoni, Giorgio

TI Role of residential demand response in modern electricity markets

SO RENEWABLE & SUSTAINABLE ENERGY REVIEWS

LA English

DT Review

DE Smart grid; Residential demand response; Electricity markets;

Sustainable energy; Energy policy

ID ENERGY-CONSUMPTION; CHALLENGES

AB Electricity generation must match the demand at each instant, following seasonal patterns and instantaneous fluctuations. Thus, one of the biggest drivers of costs and capacity requirements is the electricity demand that occurs during peak periods.

This paper reviews market-related problems of modern electric grids and possible solutions to address them. In particular, one techno-economical solution, namely residential demand response programs

enabled by a smart grid, is analyzed and modeled in detail. The implications of this solution from both economic and policy perspectives are discussed.

The analysis results in several insights: first a local optimum does not generally lead to a global optimum, especially for complex markets; second, in this approach, there exists a disconnection between the locus of the problem (electric utilities) and the locus of the solution (change of demand); third, any techno-economic solution must be carefully designed and global impact should be evaluated to ensure that the final objective is achieved; and fourth, two-way communication is an essential requirement for the successful deployment of smart grids. (C) 2014 Elsevier Ltd. All rights reserved.

C1 [Muratori, Matteo; Rizzoni, Giorgio] Ohio State Univ, Dept Mech & Aerosp Engr, Columbus, OH 43212 USA.

[Muratori, Matteo; Schuelke-Leech, Beth-Anne; Rizzoni, Giorgio] Ohio State Univ, Ctr Automot Res CAR, Columbus, OH 43212 USA.

[Schuelke-Leech, Beth-Anne] Ohio State Univ, John Glenn Sch Publ Affairs, Columbus, OH 43212 USA.

RP Muratori, M (reprint author), Ohio State Univ, Dept Mech & Aerosp Engr, Columbus, OH 43212 USA.

EM muratori.2@osu.edu; schuelke-leech.1@osu.edu; rizzoni.1@osu.edu

RI Rizzoni, Giorgio/D-2961-2016

OI Rizzoni, Giorgio/0000-0002-8397-7241

CR Ablondi B., 2010, CONSUMER ATTITUDES B

Aghaei J, 2013, RENEW SUST ENERG REV, V18, P64, DOI 10.1016/j.rser.2012.09.019

AIGNER DJ, 1984, J ECONOMETRICS, V26, P205, DOI 10.1016/0304-4076(84)90018-6

Albadi MH, 2008, ELECTR POW SYST RES, V78, P1989, DOI 10.1016/j.epsr.2008.04.002

Backer D., 2007, 2007 IEEE RUR EL POW

Borenstein S, 2002, J AM CHEM SOC, V128, P4136

CAPASSO A, 1994, IEEE T POWER SYST, V9, P957, DOI 10.1109/59.317650

Cappers P, 2010, ENERGY, V35, P1526, DOI 10.1016/j.energy.2009.06.029

CAVES DW, 1984, J ECONOMETRICS, V26, P179, DOI 10.1016/0304-4076(84)90017-4

CONEJO AJ, 2010, IEEE T SMART GRID, V1, P236

Cordaro M., UNDERSTANDING BASE L

Depuru SSSR, 2011, RENEW SUST ENERG REV, V15, P2736, DOI 10.1016/j.rser.2011.02.039

Du PW, 2011, IEEE T SMART GRID, V2, P411, DOI 10.1109/TSG.2011.2140344

Dutschke E, 2013, ENERGY POLICY

Gellings CW, 2009, SMART GRID ENABLING

GHOSH S, 2010, SMART GRID COMM SMAR, P519

Grandjean A., 2013, THESIS PARIS I TECHN

Hart D. G., 2008, US AMI REAL SMART GR, P1

HENLEY A, 1994, ECON LETT, V45, P421, DOI 10.1016/0165-1765(94)90047-7

Herter K, 2007, ENERG POLICY, V35, P2121, DOI 10.1016/j.enpol.2006.06.019

International Energy Agency, 2003, POW CHOOS DEM RESP L

KOHLER DF, 1984, J ECONOMETRICS, V26, P141, DOI 10.1016/0304-4076(84)90016-2

Li N, 2011, OPTIMAL DEMAND RESPO, P1

Livgard EF, 2010, IEEE INTERNATIONAL SYMPOSIUM ON INDUSTRIAL ELECTRONICS (ISIE 2010), P2519, DOI 10.1109/ISIE.2010.5637566

Mert W, 2008, CONSUMER ACCEPTANCE

Muratori M, 2013, P ASME 2013 DYN SYST

Muratori M, 2013, P 26 INT C EFF COST

Muratori M, 2013, ENERGY, V58, P168, DOI 10.1016/j.energy.2013.02.055

Muratori M, 2013, APPL ENERG, V107, P465, DOI 10.1016/j.apenergy.2013.02.057

O'sheasy M., 2003, ELECT J, V16, P48

Piette MA, 2006, AUTOMATED CRITICAL P

River C., 2005, PRIMER DEMAND SIDE M

Roncero JR, 2008, CIRED SEM 2008 SMART, P1

Schey S, 2012, 26 EL VEH S EVS 26 L

Strbac G, 2008, ENERG POLICY, V36, P4419, DOI 10.1016/j.enpol.2008.09.030

Swan LG, 2009, RENEW SUST ENERG REV, V13, P1819, DOI 10.1016/j.rser.2008.09.033

U.S. Department of Energy, 2006, 2006 US DEP EN

U.S. Energy Information Administration, 2013 SUMM REL ASS

U.S. Energy Information Administration (EIA), 2012, ANN EN REV 2012

U.S. Energy Information Administration, NAT GAS FIR COMB TUR

Yergin D., 2011, QUEST ENERGY SECURIT, P387

[Anonymous], 2013, STATE MARKET REPORT

NR 42

TC 38

Z9 40

U1 3

U2 21

PU PERGAMON-ELSEVIER SCIENCE LTD

PI OXFORD

PA THE BOULEVARD, LANGFORD LANE, KIDLINGTON, OXFORD OX5 1GB, ENGLAND

SN 1364-0321

J9 RENEW SUST ENERG REV

J1 Renew. Sust. Energ. Rev.

PD MAY

PY 2014

VL 33

BP 546

EP 553

DI 10.1016/j.rser.2014.02.027

PG 8

WC GREEN & SUSTAINABLE SCIENCE & TECHNOLOGY; Energy & Fuels

SC Science & Technology - Other Topics; Energy & Fuels

GA AG4XO

UT WOS:000335423900047

DA 2018-05-03

ER

PT J

AU Mlecnik, E

Visscher, H

van Hal, A

AF Mlecnik, Erwin

Visscher, Henk

van Hal, Anke

TI Barriers and opportunities for labels for highly energy-efficient houses

SO ENERGY POLICY

LA English

DT Article

DE Buildings; Energy efficiency; Policy instruments

ID INNOVATIONS; DIFFUSION

AB Promoting energy efficiency in the building sector is essential if the agreements of the Kyoto Protocol are to be honoured. Different initiatives for energy labelling of highly energy-efficient residential buildings have emerged throughout Europe as an essential method to stimulate market demand, to control grants or to ensure the quality of demonstration projects with excellent energy performance.

The paper identifies the barriers and opportunities for the further diffusion of labels for highly energy-efficient houses. A model based on the theory of the diffusion of innovation is developed to analyse perceived attributes of existing European labels. The paper investigates the innovation characteristics of existing labels in Europe, with a focus on advanced countries. The question of compatibility with the development of the European Energy Performance of Buildings Directive (EPBD) is examined in detail.

We found that the diffusion of emerging and already existing voluntary European labels for highly energy-efficient houses is needed. Their complexity can be lowered and relative advantage, trialability, observability, and compatibility can be increased. EPBD calculation procedures should be able to receive highly energy-efficient houses. In the framework of the recast of the EPBD, official recognition of existing voluntary labels is recommended. (C) 2010 Elsevier Ltd. All rights reserved.

C1 [Mlecnik, Erwin; Visscher, Henk] Delft Univ Technol, OTB Res Inst Built Environm, NL-2600 GA Delft, Netherlands.

[Mlecnik, Erwin] Passiehuis Platform Vzw, B-2600 Berchem, Belgium.

[van Hal, Anke] Delft Univ Technol, Fac Architecture, NL-2600 GA Delft, Netherlands.



- [van Hal, Anke] Nyenrode Business Univ, NL-3620 AC Breukelen, Netherlands.  
 RP Mlecnik, E (reprint author), Delft Univ Technol, OTB Res Inst Built Environm, POB 5030, NL-2600 GA Delft, Netherlands.  
 EM e.mlecnik@tudelft.nl  
 RI Visscher, Henk/R-8509-2017  
 OI Visscher, Henk/0000-0003-0929-1812  
 CR Hekkert M., 2009, 0908 ISU U UTR  
 Dokka T. H., 2008, PASSIVHUS NORDEN 200, P248  
 Sambale M., 2009, P 13 INT PASS HOUS C, P259  
 Lang G., 2009, PASSNETT COUNTRY REP  
 Hodgson G., 2007, WP34 BRE  
 Beerepoot M., 2007, THESIS DELFT U TECHN  
 BEEREPOOT M, 2005, ENVIRON PLANN B, P21  
 Frey T., 2006, P 10 INT C PASS HOUS, P361  
 Birt B.J., 2009, P SASBE 2009 C DELFT  
 Brown L. A., 1981, INNOVATION DIFFUSION  
 Casals XG, 2006, ENER G BUILDINGS, V38, P381, DOI 10.1016/j.enbuild.2005.05.004  
 \*CEPHEUS, 2001, CEPHEUS PROJ  
 Cobbaert B., 2005, P BEN PASS HOUS S 20, P33  
 Dieperink C, 2004, ENER G POLICY, V32, P773, DOI 10.1016/S0301-4215(02)00341-5  
 Jensen O. M., 2008, P PASSIVEHOUSE 2008, P31  
 Edquist C., 1993, NATL INNOVATION SYST  
 Edmond C, 2006, ENER G POLICY, V34, P4042, DOI 10.1016/j.enpol.2005.10.001  
 Quigley J.M., 2008, W08001 U CAL I BUS E  
 EKELINKAMP A, 2000, NIEUWE INSTRUMENTEN  
 Elswijk M., 2008, EUROPEAN EMBEDDING P  
 \*EN, 2006, 2006545 EC COM  
 [Anonymous], 2007, 15217 EN  
 EP, 2009, COM20080780C60413200  
 FEIST W, 1999, PROTOKOLLBAND 18 QUA  
 FERDINAND C, 2007, P PASSIVEHOUSE 2007  
 FRANZELIN A, 2007, P 11 INT C PASS HOUS  
 \*IEA SHC TASK, 37 IEA SHC TASK  
 \*IG PASS, 2009, PER NEWSL IG PASS DE  
 \*IPCC, 2007, SUMM POL MARK IPCC W  
 Itard L, 2008, SUSTAINABLE NO EUROP  
 Itard L., 2008, BUILDING RENOVATION  
 Boonstra C., 2006, P 10 INT C PASS HOUS, P235  
 Kemp R, 2000, OECD WORKSH INN ENV  
 \*KLIM, 2009, KLIM ANN REP  
 Laustsen J., 2008, P 12 INT PASS HOUS C, P43  
 \*LEON EN, 2006, WEB CAST PASS HOUS  
 Marrecau C., 2009, P 13 INT PASS HOUS C, P213  
 Miller D., 2009, SELLING SOLAR DIFFUS  
 Mlecnik E., 2004, P PHS 2004 2 BEN PAS, P134  
 Hasselaar E., 2008, P 29 AIVC C KYOT JAP, V3, P119  
 Mlecnik E., 2008, P PLEA 2008 25 C PAS  
 Mlecnik E., 2006, P 10 INT PASS HOUS C, P125  
 Mlecnik E., 2008, PASSIVHUS NORDEN 200, P192  
 Morbitzer C, 2008, OPEN HOUSE INT, V33, P17  
 Murakami S., 2002, SUSTAINABLE BUILDING  
 Nelson RR, 2002, RES POLICY, V31, P265, DOI 10.1016/S0048-7333(01)00140-8  
 \*PEP, 2008, PROM EUR PASS HOUS I  
 Perez-Lombard L, 2009, ENER G BUILDINGS, V41, P272, DOI 10.1016/j.enbuild.2008.10.004  
 PHP, 2009, PASSIEFHUIS PLATFORM  
 \*PHPP, 2007, PASS PROJ PAK SOFTW  
 Rogers E., 2003, DIFFUSION INNOVATION  
 Rongen L., 2008, P 12 INT PASS HOUS C, P491

Sparber W., 2007, P PLEA2007 24 C PASS  
Schnieders E, 2006, ENER POLICY, V34, P151, DOI 10.1016/j.enpol.2004.08.049  
Schnieders J., 2003, P ECEEE SUMM STUD 20, P341  
Schulze-Darup B., 2008, P 12 INT PASS HOUS C, P51  
Sunikka M., 2006, THESIS DELFT U TECHN  
Tambach M, 2010, ENER POLICY, V38, P981, DOI 10.1016/j.enpol.2009.10.050  
UBERBACHER D, 2009, THESIS LUND U SWEDEN  
VANHAL JDM, 2000, THESIS DELFT U TECHN  
Loon S. van, 2007, P PASSIVEHOUSE 2007, P53  
VISSCHER H, 2009, P SASBE C DELFT NETH

NR 62

TC 38

Z9 39

U1 0

U2 10

PU ELSEVIER SCI LTD

PI OXFORD

PA THE BOULEVARD, LANGFORD LANE, KIDLINGTON, OXFORD OX5 1GB, OXON, ENGLAND

SN 0301-4215

J9 ENER POLICY

J1 Energy Policy

PD AUG

PY 2010

VL 38

IS 8

BP 4592

EP 4603

DI 10.1016/j.enpol.2010.04.015

PG 12

WC Economics; Energy & Fuels; Environmental Sciences; Environmental Studies

SC Business & Economics; Energy & Fuels; Environmental Sciences & Ecology

GA 615EY

UT WOS:000279117500074

DA 2018-05-03

ER

PT J

AU Tompros, S

Mouratidis, N

Draaijer, M

Foglar, A

Hrasnica, H

AF Tompros, Spyridon

Mouratidis, Nikolaos

Draaijer, Maurice

Foglar, Andreas

Hrasnica, Halid

TI Enabling Applicability of Energy Saving Applications on the Appliances  
of the Home Environment

SO IEEE NETWORK

LA English

DT Article

AB Given the energy waste problem in contemporary households and the consequent need for optimal energy use, this article presents a novel network architecture that is generically applicable on domestic appliances, such as white goods, and audiovisual and communication equipment, and is capable of performing real-time management of their energy consumption. Deploying the latest information and communication technology, the proposed architecture enables definition of energy saving applications that perform three main functions: real-time estimation of the energy consumption of the home environment,

without exploiting smart metering devices; control of domestic appliances energy use so that energy consumption of the home environment is kept within user-defined limits; and autonomous identification and management of standby devices, targeting minimal energy consumption.

EM stombros@keletron.com

FU European Commission

FX The presented architecture has been elaborated in the frame of the 224621 project "A Novel Architecture for Modeling and Virtualising Energy Consumption of Household Appliances-AIM" [13], co-funded by the European Commission. The project consortium consists of Eurescom GmbH (Coordinator), Philips, Indesit, Cefriel, Polichnico di Milano, Doebelt Datenkommunikation, France Telecom, Infineon, BCT, PPC, and Keletron (Technical Manager).

CR \*AIM CONS, DEL 2 3 APPL PROF SP

\*AIM CONS, NOV ARCH MOD VIRT MA

\*BEYW CONS, BEYW BUILD EN WATCH

CASCIO V, 2006, 14 MED C CONTR AUT J

Curbera F, 2002, IEEE INTERNET COMPUT, V6, P86, DOI 10.1109/4236.991449

de Almeida A., 2006, INT EN EFF DOM APPL

\*DEHEMS CONS, DEHEMS DIG ENV HOM E

Gu T, 2004, IEEE PERVAS COMPUT, V3, P66

IEA (International Energy Agency), 2003, COOL APPL POL STRAT

\*ISO IEC, 2006, 1454321 ISOIEC

Jeong YK, 2008, IEEE T CONSUM ELECTR, V54, P487, DOI 10.1109/TCE.2008.4560119

SCHISCHKE K, 2008, ENERGY EFFICIENCY ME, P1

TOMPROS S, 2008, P ACM PETRA 08 ATH G, V282

NR 13

TC 38

Z9 40

U1 0

U2 4

PU IEEE-INST ELECTRICAL ELECTRONICS ENGINEERS INC

PI PISCATAWAY

PA 445 HOES LANE, PISCATAWAY, NJ 08855 USA

SN 0890-8044

J9 IEEE NETWORK

JI IEEE Netw.

PD NOV-DEC

PY 2009

VL 23

IS 6

BP 8

EP U16

DI 10.1109/MNET.2009.5350347

PG 9

WC Computer Science, Hardware & Architecture; Computer Science, Information

Systems; Engineering, Electrical & Electronic; Telecommunications

SC Computer Science; Engineering; Telecommunications

GA 530QO

UT WOS:000272607600003

DA 2018-05-03

ER

PT J

AU Kwong, QJ

Adam, NM

Sahari, BB

AF Kwong, Qi Jie

Adam, Nor Mariah

Sahari, B. B.

TI Thermal comfort assessment and potential for energy efficiency enhancement in modern tropical buildings: A review

SO ENERGY AND BUILDINGS

LA English

DT Review

DE Air conditioning system; Thermal comfort; Tropical buildings; Energy efficiency; Computational simulation; Adaptive behaviour

ID AIR-CONDITIONED BUILDINGS; NATURALLY VENTILATED BUILDINGS; NATURAL VENTILATION; TRANSITIONAL SPACES; INDOOR TEMPERATURE; FIELD EXPERIMENTS; OFFICE BUILDINGS; ADAPTIVE MODEL; HUMID CLIMATE; ENVIRONMENT

AB The rapid growth in population and economy activities in the tropical countries has led to an increase in energy consumption which hastens the depletion of available energy resources. The building sector is one of the major end users of energy. On the other hand, the air conditioning system is viewed as an important tool to sustain and improve thermal comfort of occupants, but this system is often the biggest energy consumer in buildings. This has raised concerns on efficient use of the air conditioning system for reduction in energy cost. In order to identify the thermal comfort perception of occupants as well as energy conservation potentials in tropical buildings, various thermal comfort assessments were conducted which included field surveys and chamber studies. This paper provides a comprehensive review of the energy efficiency improvement potentials in air-conditioned tropical buildings by considering thermal comfort of occupants. Some of the studies conducted in the institutes of learning, offices and residential were reviewed and focus was placed on the thermal comfort studies that emphasis on balance between energy efficiency and thermal comfort. It was estimated that a reduction of 2150 GWh of energy demand annually in Malaysia can be achieved if the thermostat set-point is set higher by 2 degrees C, together with a reduction of  $3 \times 10^9$  lbs ( $1.36 \times 10^9$  kg) of greenhouse gases. Besides, the use of computational simulation tools for prediction of thermal comfort and adaptive behaviour of people in the tropics towards their immediate thermal environment are also highlighted. (C) 2013 Elsevier B.V. All rights reserved.

C1 [Kwong, Qi Jie; Adam, Nor Mariah; Sahari, B. B.] Univ Putra Malaysia, Dept Mech & Mfg Engn, Fac Engn, Upm Serdang 43400, Selangor Darul, Malaysia.

RP Kwong, QJ (reprint author), Univ Putra Malaysia, Dept Mech & Mfg Engn, Fac Engn, Upm Serdang 43400, Selangor Darul, Malaysia.

EM kwong.qjie@mail.com

RI Kwong, Qi Jie/E-9457-2016

OI Kwong, Qi Jie/0000-0001-7094-5040

FU Research University Grant Scheme (RUGS) [05-02-12-1883RU]

FX The authors would like to thank the Research University Grant Scheme (RUGS) under Project Number 05-02-12-1883RU for the financial support provided.

CR American Society of Heating Refrigerating and Air-Conditioning Engineers (ASHRAE), 2004, 55 ASHRAE AM SOC HEA

AWBI HB, 1994, ASHRAE J, V36, P17

Aynsley R., 2007, AIRAH SUST TROP SUB, P1135

Aynsley R., 1999, P WORLD REN EN C, P333

Barlow S, 2007, ENERB BUILDINGS, V39, P837, DOI 10.1016/j.enbuild.2007.02.002

Brager GS, 1998, ENERB BUILDINGS, V27, P83, DOI 10.1016/S0378-7788(97)00053-4

BUSCH JF, 1992, ENERB BUILDINGS, V18, P235, DOI 10.1016/0378-7788(92)90016-A

Catalina T, 2009, BUILD ENVIRON, V44, P1740, DOI 10.1016/j.buildenv.2008.11.015

Cheong KWD, 2003, BUILD ENVIRON, V38, P63, DOI 10.1016/S0360-1323(02)00020-3

Chiang WH, 2012, BUILD ENVIRON, V48, P113, DOI 10.1016/j.buildenv.2011.09.002

Chow WK, 1996, BUILD ENVIRON, V31, P319, DOI 10.1016/0360-1323(95)00047-X

Conceicao EZE, 2012, BUILD ENVIRON, V50, P190, DOI 10.1016/j.buildenv.2011.10.013

Corgnati SP, 2007, BUILD ENVIRON, V42, P951, DOI 10.1016/j.buildenv.2005.10.027

Daghigh R, 2008, J BUILD PHYS, V32, P175, DOI 10.1177/1744259108097333

Daghigh R, 2009, INDOOR BUILT ENVIRON, V18, P113, DOI 10.1177/1420326X09103013

de Dear RJ, 2002, ENERB BUILDINGS, V34, P549, DOI 10.1016/S0378-7788(02)00005-1

DEDEAR RJ, 1991, INT J BIOMETEOROL, V34, P259, DOI 10.1007/BF01041840

Djongyang N, 2010, RENEW SUST ENERB REV, V14, P2626, DOI 10.1016/j.rser.2010.07.040

ELLIS FP, 1952, J HYG-CAMBRIDGE, V50, P415, DOI 10.1017/S0022172400019690

- Energy Policy and Planning Office, 2010, EN STAT THAIL 2010 2
- Evola G, 2006, ENERGBUILDINGS, V38, P491, DOI 10.1016/j.enbuild.2005.08.008
- Fanger PO, 2002, ENERGBUILDINGS, V34, P533
- Fanger P. O., 1970, THERMAL COMFORT ANAL
- Feriadi H, 2004, ENERGBUILDINGS, V36, P614, DOI 10.1016/j.enbuild.2004.01.011
- Gagge AP, 1986, ASHRAE T, V92, P709
- Givoni A., 2006, BUILD RES INF, V34, P496
- Habeebullah BA, 2007, ENERGBUILDINGS, V39, P355, DOI 10.1016/j.enbuild.2006.07.006
- Han J, 2007, BUILD ENVIRON, V42, P4043, DOI 10.1016/j.buildenv.2006.06.028
- Hui S.C.M., 2007, JOINT HONG KONG HANG
- HUMPHREYS MA, 1977, BUILD ENVIRON, V12, P231, DOI 10.1016/0360-1323(77)90025-7
- Hwang RL, 2006, ENERGBUILDINGS, V38, P53, DOI 10.1016/j.enbuild.2005.05.001
- Hwang RL, 2008, BUILD ENVIRON, V43, P2013, DOI 10.1016/j.buildenv.2007.12.004
- Indraganti M, 2010, ENERGBUILDINGS, V42, P273, DOI 10.1016/j.enbuild.2009.09.003
- International Organization of Standardization (ISO), 1994, MOD THERM ENV DET PM
- Jabatan Perangkaan Malaysia, 2010, BUK TAH PER MAL
- Jitkhajornwanich K, 2002, BUILD ENVIRON, V37, P1193, DOI 10.1016/S0360-1323(01)00088-9
- Karyono TH, 2000, BUILD ENVIRON, V35, P77, DOI 10.1016/S0360-1323(98)00066-3
- Khedari J, 2000, ENERGBUILDINGS, V32, P245, DOI 10.1016/S0378-7788(00)00050-5
- Kwok A.G., 1998, ASHRAE T, V104, P1031
- Kwok AG, 2010, BUILD ENVIRON, V45, P18, DOI 10.1016/j.buildenv.2009.02.005
- Kwong QJ, 2011, RENEW SUST ENER REV, V15, P4548, DOI 10.1016/j.rser.2011.07.097
- Kwong Q.J., 2011, J INDOOR BUILT ENV, V20, P524
- Lam JC, 2003, BUILD ENVIRON, V38, P493, DOI 10.1016/S0360-1323(02)00132-4
- Li BZ, 2011, INDOOR BUILT ENVIRON, V20, P101, DOI 10.1177/1420326X10394495
- Li YG, 2000, BUILD ENVIRON, V35, P191, DOI 10.1016/S0360-1323(99)00011-6
- Lin Z, 2005, INT J REFRIG, V28, P276, DOI 10.1016/j.ijrefrig.2004.04.005
- Lombard L, 2008, J ENERGY BUILDINGS, V40, P394
- Longo T.A., 2011, P BUILD SIM 2011 12
- Mallick FH, 1996, ENERGBUILDINGS, V23, P161, DOI 10.1016/0378-7788(95)00940-X
- Mathews EH, 2001, ENERGBUILDINGS, V33, P853, DOI 10.1016/S0378-7788(01)00075-5
- MCINTYRE DA, 1982, ENERGBUILDINGS, V5, P89, DOI 10.1016/0378-7788(82)90003-2
- Ministry of Energy, 2008, LOW EN OFF BUILD
- [Anonymous], 15252007 MS
- Nicol F, 1996, ENERGBUILDINGS, V23, P169, DOI 10.1016/0378-7788(95)00941-8
- Nicol JF, 2002, ENERGBUILDINGS, V34, P563, DOI 10.1016/S0378-7788(02)00006-3
- Nikolopoulou M, 2003, ENERGBUILDINGS, V35, P95, DOI 10.1016/S0378-7788(02)00084-1
- Noh KC, 2007, BUILD ENVIRON, V42, P689, DOI 10.1016/j.buildenv.2005.10.033
- Parsons KC, 2002, ENERGBUILDINGS, V34, P593, DOI 10.1016/S0378-7788(02)00009-9
- Pitts A., 2008, 25 C PASS LOW EN ARC
- Pitts A, 2007, ENERGBUILDINGS, V39, P815, DOI 10.1016/j.enbuild.2007.02.006
- Richtr J., 2001, 7 INT IBPSA C 2001, P1135
- Samirah A.R., 1996, P WORLD REN EN C WRE
- Sekhar SC, 2011, BUILD ENVIRON, V46, P1905, DOI 10.1016/j.buildenv.2011.03.012
- Stamou AI, 2008, APPL THERM ENG, V28, P1206, DOI 10.1016/j.applthermaleng.2007.07.020
- Tenaga Nasional Berhad, 2012, PRIC TAR COMM
- THAM KW, 1993, BUILD ENVIRON, V28, P287, DOI 10.1016/0360-1323(93)90034-Z
- Tom S, 2008, ASHRAE J, V50, P18
- UNDP (United Nations Development Programme), 2006, ACH IND EN EFF MAL
- Wan JW, 2009, BUILD ENVIRON, V44, P411, DOI 10.1016/j.buildenv.2008.04.001
- Wang L., 2007, ARCHITECT SCI REV, V50, P224
- WEBB C G, 1959, Br J Ind Med, V16, P297
- Wijewardane S, 2008, RENEW ENER, V33, P2057, DOI 10.1016/j.renene.2007.11.009
- Wong NH, 2003, ENERGBUILDINGS, V35, P337, DOI 10.1016/S0378-7788(02)00109-3
- Wong NH, 2002, BUILD ENVIRON, V37, P1267, DOI 10.1016/S0360-1323(01)00103-2
- Yamtraipat N, 2006, ENERGPOLICY, V34, P765, DOI 10.1016/j.enpol.2004.07.009
- Yamtraipat N, 2005, SOL ENERGY, V78, P504, DOI 10.1016/j.solener.2004.07.006
- Yang KH, 1997, BUILD ENVIRON, V32, P25, DOI 10.1016/S0360-1323(96)00027-3

Yang W, 2008, INT J BIOMETEOROL, V52, P385, DOI 10.1007/s00484-007-0133-4  
Yao RM, 2009, BUILD ENVIRON, V44, P2089, DOI 10.1016/j.buildenv.2009.02.014  
Zainazlan MZ, 2007, J DESALINATION, V209, P261  
Zhang H, 2007, INT J BIOMETEOROL, V51, P349, DOI 10.1007/s00484-006-0079-y

NR 81

TC 37

Z9 37

U1 3

U2 48

PU ELSEVIER SCIENCE SA

PI LAUSANNE

PA PO BOX 564, 1001 LAUSANNE, SWITZERLAND

SN 0378-7788

EI 1872-6178

J9 ENERGBUILDINGS

J1 Energy Build.

PD JAN

PY 2014

VL 68

BP 547

EP 557

DI 10.1016/j.enbuild.2013.09.034

PN A

PG 11

WC Construction & Building Technology; Energy & Fuels; Engineering, Civil

SC Construction & Building Technology; Energy & Fuels; Engineering

GA 292EP

UT WOS:000329885300056

DA 2018-05-03

ER

PT J

AU Mlecnik, E

Schutze, T

Jansen, S.J.T

de Vries, G

Visscher, H.J

van Hal, A

AF Mlecnik, E.

Schutze, T.

Jansen, S. J. T.

de Vries, G.

Visscher, H. J.

van Hal, A.

TI End-user experiences in nearly zero-energy houses

SO ENERGY AND BUILDINGS

LA English

DT Article

DE Passive house; Low-energy house; Post-occupancy evaluation; Comfort;

User experiences; End-user satisfaction; Heating; Mechanical

ventilation; Indoor air quality; Summer comfort

ID BUILDINGS

AB High end-user satisfaction levels are key for the acceptance of nearly zero-energy housing. Post-occupancy evaluation research on highly energy-efficient dwellings can lead to recommendations which will influence their performance in the expected future large volume market of such houses. This study analysed mainly German, Austrian and Swiss post-occupancy evaluation research results on nearly zero-energy dwellings and undertook a survey of occupants of nearly zero-energy houses in the Netherlands. The study determined how various comfort parameters (such as winter thermal comfort, summer thermal

- comfort, indoor air quality and acoustics), information provision and control parameters are related to positive or negative end-user appraisal, finding that summer comfort design and the quality of - and information about - heating and ventilation systems are critical factors which must be addressed to improve user satisfaction in nearly zero-energy dwellings. (C) 2012 Elsevier B.V. All rights reserved.
- C1 [Mlecnik, E.; Jansen, S. J. T.; Visscher, H. J.] Delft Univ Technol, Res Inst Built Environm, OTB, NL-2600 GA Delft, Netherlands.  
 [Mlecnik, E.] Passiefhuis Platform vzw PHP, B-2600 Berchem, Belgium.  
 [Schutze, T.; de Vries, G.; van Hal, A.] Delft Univ Technol, Fac Architecture, NL-2600 GA Delft, Netherlands.  
 [van Hal, A.] Nyenrode Business Univ, NL-3620 AC Breukelen, Netherlands.
- RP Mlecnik, E (reprint author), Delft Univ Technol, OTB Res Inst Built Environm, POB 5030, NL-2600 GA Delft, Netherlands.
- EM E.mlecnik@tudelft.nl  
 RI Visscher, Henk/R-8509-2017  
 OI Visscher, Henk/0000-0003-0929-1812  
 CR Berndgen-Kaiser A., 2007, ILS NRW SCHRIFTEN, V202  
 Danner M., 2003, P 7 INT PASS GERM, P321  
 Danner M., 2001, WOHNEN PASSIVHAUSSIE  
 Duijm F., 2007, GEZONDHEID VENTILATI  
 Ebel W., 1997, NUTZER VERHALTEN PROT, V9, pII1  
 Ebel W., 2003, WOHNEN PASSIV NIEDRI  
 Elswijk M., 2008, PASSIVE HOUSES INT P  
 Engelmann P., 2008, P 12 PASS NURNB PASS  
 Feist W., 2005, ENERG BUILDINGS, V37, P1186, DOI 10.1016/j.enbuild.2005.06.020  
 Feist W., 1997, NUTZER VERHALTEN PROT  
 Femenias P., 2004, THESIS CHALMERS U TE  
 Flade A., 1991, NUTZERORIENTIERTES W  
 Flade A., 1997, BEGLEITFORSCHUNG INN  
 Flade A., 2004, UMWELTPSYCHOLOGIE, V8, P66  
 Flade A., 2003, WOHNKOMFORT PASSIVHA  
 Meyer R., 2003, P 7 INT PASS DARMST, P329  
 Hacke U., 2006, AKZEPTANZ ENERGETISC  
 Mack B., 2004, UMWELTPSYCHOLOGIE, V8, P124  
 Hallmann S., 2003, P 7 INT PASS DARMST, P337  
 Hauge AL, 2011, ADV BUILD ENERGY RES, V5, P109, DOI 10.1080/17512549.2011.582350  
 Hermelink A., 2003, PROTOKOLLBAND PASSIV, P41  
 Hermelink A., 2006, EUR C COOP EXCH 2006  
 Hubner H., 2001, PROTOKOLLBAND PASSIV, P189  
 Hubner H., 2001, P 5 APSS BOBL GERM, P129  
 Hermelink A., 2003, P 7 INT PASS DARMST, P345  
 Hubner H., 2002, OKOLOGISCHE PERSPEKT, V2, P309  
 Jongeneel W. P., 2011, 630789006 RIVM  
 Keul A. G., 2009, UMWELTPSYCHOLOGISCHE  
 Keul A. G., 2001, BERICHTE ENERGIE UMW, V23  
 Keul A. G., 2010, ARCHITECTURE RES, V2, P47  
 Kuindersma P., 2007, ONDERZOEK NAAR WOONK  
 Loga T., 1997, NUTZER VERHALTEN PROT, pI1  
 Mahdavi A, 2010, ENERG BUILDINGS, V42, P1314, DOI 10.1016/j.enbuild.2010.02.025  
 Marans R., 1981, EVALUATING BUILT ENV  
 Meir IA, 2009, ADV BUILD ENERGY RES, V3, P189, DOI 10.3763/aber.2009.0307  
 Mlecnik E., 2011, ENERGY EFFICIENCY  
 Pfluger R., 2001, 15 CEPHEUS PROJ PASS  
 Pfluger R., 2010, P INT PASS HOUS C DR, P379  
 Preiser WF, 1988, POSTOCCUPANCY EVALUA  
 Preiser W. F. E., 2005, ASSESSING BUILDING P  
 Richter W., 2003, EINFLUSS NUTZER VERHA  
 Rohrman B., 1994, SOZIALWISSENSCHAFTLI  
 ROTHWEILER H, 1992, ATMOS ENVIRON A-GEN, V26, P2219, DOI 10.1016/0960-1686(92)90411-D

Schmitz B., 1997, NUTZERVERHALTEN PROT, pIV1  
 Schnieders E, 2006, ENERG POLICY, V34, P151, DOI 10.1016/j.enpol.2004.08.049  
 Schnieders J., 2003, P ECEEE SUMM STUD 20, P341  
 Schutze T., 2011, P PASS HOUS 2011 BRU, P104  
 Siegel S, 1988, NONPARAMETRIC STAT B  
 Stieldorf K., 2001, ANAL NUTZERINNENVERH  
 Keul A., 2009, NACHHALTIGKEITS MON  
 Treberspurg M., 2007, PAS P CENTR PAS DOM, P257  
 Treberspurg M., 2007, NACHHALTIGKEITS MONI  
 Ginkel J. T. van, 2007, INVENTARISATIE WONIN  
 Oesen M. von, 2001, P PASS 2001 REUTL GE  
 Mauthner F., 2008, ENERGIETECHNISCHE BA  
 Wagner W., 2010, BERICHTE ENERGIE UMW  
 Wagner W., 2006, ERNEUERBARE ENERGIEN, V2, P22  
 NR 57  
 TC 37  
 Z9 37  
 U1 0  
 U2 27  
 PU ELSEVIER SCIENCE SA  
 PI LAUSANNE  
 PA PO BOX 564, 1001 LAUSANNE, SWITZERLAND  
 SN 0378-7788  
 EI 1872-6178  
 J9 ENERG BUILDINGS  
 JI Energy Build.  
 PD JUN  
 PY 2012  
 VL 49  
 BP 471  
 EP 478  
 DI 10.1016/j.enbuild.2012.02.045  
 PG 8  
 WC Construction & Building Technology; Energy & Fuels; Engineering, Civil  
 SC Construction & Building Technology; Energy & Fuels; Engineering  
 GA 966ZI  
 UT WOS:000305875500055  
 DA 2018-05-03  
 ER  
  
 PT J  
 AU Nassen, J  
     Sprei, F  
     Holmberg, J  
 AF Nassen, Jonas  
     Sprei, Frances  
     Holmberg, John  
 TI Stagnating energy efficiency in the Swedish building sector-Economic and  
     organisational explanations  
 SO ENERGY POLICY  
 LA English  
 DT Article  
 DE Energy efficiency; Swedish building sector; Energy price elasticity  
 ID DISCOUNT RATES; PARADOX; ELASTICITIES; CONSUMPTION; BARRIERS; DEMAND;  
     POLICY  
 AB The development towards higher energy efficiency in the Swedish building sector stagnated in the late  
     1980s and 1990s. In new buildings the average specific energy use for heating is twice as high as in the best  
     performing buildings 20 years ago. By combining econometric studies and interviews with actors in the



building sector we analyse the underlying economic and organisational causes for this development. In the stock of buildings, specific energy use for heating (kWh/m<sup>2</sup>/yr) has a high correlation with increasing energy prices and price elasticities have not changed markedly over time. This implies that the stagnation to a large extent can be explained by energy price trends. On the contrary, in new buildings the correlation between energy prices and specific energy use is much weaker. One important cause of low sensitivity to price changes is that information about the life cycle cost (LCC) of different investment alternatives is often not available to the involved actors. The most common investment criterion is instead the requirements of the national building energy standard which has developed into a norm rather than a minimum for energy performance. In this paper we also discuss potential improvements in the learning processes within the sector. (C) 2008 Elsevier Ltd. All rights reserved.

C1 [Nassen, Jonas; Sprei, Frances; Holmberg, John] Chalmers, Environm & Energy Dept, SE-41296 Gothenburg, Sweden.

RP Nassen, J (reprint author), Chalmers, Environm & Energy Dept, SE-41296 Gothenburg, Sweden.

EM jonasna@chalmers.se

OI Nassen, Jonas/0000-0002-1564-8585

FU AES programme at the Swedish National Energy Administration; Swedish Research Council for Environment, Agricultural Sciences and Spatial Planning

FX Funding from the AES programme at the Swedish National Energy Administration, and the Swedish Research Council for Environment, Agricultural Sciences and Spatial Planning are gratefully acknowledged. Thanks to Christian Azar, Sten Karlsson and Stefan Wirsenius for comments on the manuscript. We are also grateful to Hans Eek, Kristina Gabriell, Are Kjeang, Hans Nilsson, Christer Wannheden, Svante Wijk and five other interviewees.

CR Andersson S., 2003, FJARRVARME SVERIGE 2

ATKINSON J, 1995, 1995 GLOBAL WARMING

Borgbrant J., 2003, BYGGPROCESSEN STRATE

BUHRING A, 2004, MARKPOTENZIAL PASSIV

\*BYGG BO, 2003, SYST UPPH LIVSCY HEL

\*BYGG BO, 2003, STYRG SLUTR BYGG BO

Coase RH, 1937, ECONOMICA-NEW SER, V4, P386, DOI 10.1111/j.1468-0335.1937.tb00002.x

Cyert R. M., 1992, BEHAV THEORY FIRM

DAHL C, 1991, ENERG ECON, V13, P203, DOI 10.1016/0140-9883(91)90021-Q

DeCanio SJ, 1998, ENERG POLICY, V26, P441, DOI 10.1016/S0301-4215(97)00152-3

DUNSTAN JM, 1988, ENERG ECON, V20, P206

ELMORTH A, 2002, ENERGIMYNDIGEHTEN NA, P66

ERICKSON RJ, 1997, PAPER PALSTIC ENRGY

Femenias P., 2004, THESIS CHALMERS U TE

Goodwin P, 2004, TRANSPORT REV, V24, P275, DOI 10.1080/0144164042000181725

Haas R, 1998, ENERG ECON, V20, P421, DOI 10.1016/S0140-9883(98)00003-6

HAUSMAN JA, 1979, BELL J ECON, V10, P33, DOI 10.2307/3003318

HIRST E, 1990, RESOUR CONSERV RECY, V3, P267, DOI 10.1016/0921-3449(90)90023-W

JAFFE AB, 1994, RESOUR ENERGY ECON, V16, P91, DOI 10.1016/0928-7655(94)90001-9

JOSEPHSSON PE, 2003, LARANDE BYGGPROJEKT

KUEHN S, 1998, LIVSTILENS BETYDNING

LEVINE MD, 1995, ANNU REV ENERG ENV, V20, P535

LINDAHL M, 2003, ENERGY OPTIMIZING MU

LOFGREN BE, 2001, BIOENERGI, P19

Lovins A. B., 1992, ENERGY EFFICIENT BUI

Lundin R. A., 1995, SCAND J MANAG, V11, P437, DOI DOI 10.1016/0956-5221(95)00036-U

Nakicenovic N, 1998, GLOBAL ENERGY PERSPE

Nassen J, 2005, ENERG POLICY, V33, P1037, DOI 10.1016/j.enpol.2003.11.004

Nesbakken R, 2001, SCAND J ECON, V103, P165, DOI 10.1111/1467-9442.00236

Newell RG, 2003, J REGUL ECON, V23, P43, DOI 10.1023/A:1021879330491

NILSSON A, 2003, ENERGIANVANDING NYBY

Nordhaus WD, 1977, INT STUDIES DEMAND E

\*NUTEK, 1995, STYRM IN EN, P48

OECD, 2003, ENV SUST BUILD CHALL  
 OECD/IEA (Organisation for Economic Co-operation and Development/International Energy Agency),  
 2004, OIL CRIS CLIM CHALL  
 Ostertag K., 1999, IEA INT WORKSH TECHN  
 PRINDYCK RS, 1979, STRUCTURE WORLD ENER  
 PRINDYCK RS, 1991, ECONOMETRIC MODELS E  
 RCEP, 2000, EN CHANG CLIM  
 SANSTAD AH, 1994, ENER G POLICY, V22, P811, DOI 10.1016/0301-4215(94)90139-2  
 Sorrell S, 2003, ENER G POLICY, V31, P865, DOI 10.1016/S0301-4215(02)00130-1  
 \*SOU, 2002, SKARPN GUBB KVAL KOS  
 \*STAT SWED, 2003, EN STAT ONE 2 DWELL  
 STEEN P, 1981, ENERGI TILL MYCKET F  
 \*SWED COUNC BUILD, 1996, EN SPARM INV VARM BO  
 \*SWED EN AG, 2003, EN SWED 2003  
 TRAIN K, 1985, ENERGY, V10, P1243, DOI 10.1016/0360-5442(85)90135-5  
 van Soest DP, 2001, ENVIRON RESOUR ECON, V18, P101, DOI 10.1023/A:1011112406964

NR 48  
 TC 37  
 Z9 37  
 U1 0  
 U2 1  
 PU ELSEVIER SCI LTD  
 PI OXFORD  
 PA THE BOULEVARD, LANGFORD LANE, KIDLINGTON, OXFORD OX5 1GB, OXON, ENGLAND  
 SN 0301-4215  
 J9 ENER G POLICY  
 JI Energy Policy  
 PD OCT  
 PY 2008  
 VL 36  
 IS 10  
 BP 3814  
 EP 3822  
 DI 10.1016/j.enpol.2008.07.018  
 PG 9

WC Economics; Energy & Fuels; Environmental Sciences; Environmental Studies  
 SC Business & Economics; Energy & Fuels; Environmental Sciences & Ecology  
 GA 367ON  
 UT WOS:000260561400019  
 DA 2018-05-03  
 ER

PT J  
 AU Kumar, A  
 Hancke, GP  
 AF Kumar, Anuj  
 Hancke, Gerhard P.

TI An Energy-Efficient Smart Comfort Sensing System Based on the IEEE 1451  
 Standard for Green Buildings  
 SO IEEE SENSORS JOURNAL  
 LA English  
 DT Article  
 DE IEEE1451 standard; sensor node; thermal comfort; graphical user  
 interface; smart sensor; green building  
 ID THERMAL COMFORT; IEEE-1451 STANDARD; SENSOR NETWORKS; CLASSIFICATION;  
 ENVIRONMENT; QUALITY  
 AB In building automation, comfort is an important aspect, and the real-time measurement of comfort is  
 notoriously complicated. In this paper, we have developed a wireless, smart comfort sensing system. The

important parameters in designing the prevalent measurement of comfort systems, such as portability, power consumption, reliability, and system cost, were considered. To achieve the target design goals, the communication module, sensor node, and sink node were developed based on the IEEE1451 standard. Electrochemical and semiconductor sensors were considered for the development of the sensor array, and the results of both technologies were compared. The sensor and sink nodes were implemented using the ATmega88 microcontroller. Microsoft Visual Studio 2013 preview was used to create the graphical user interface in C#. The sensors were calibrated after the signal processing circuit to ensure that the standard accuracy of the sensor was achieved. This paper presents detailed design solutions to problems that existed in the literature.

C1 [Kumar, Anuj] Univ Pretoria, Dept Elect Elect & Comp Engn, ZA-0002 Pretoria, South Africa.

[Hancke, Gerhard P.] City Univ Hong Kong, Dept Comp Sci, Hong Kong, Hong Kong, Peoples R China.

RP Kumar, A (reprint author), Univ Pretoria, Dept Elect Elect & Comp Engn, ZA-0002 Pretoria, South Africa.

EM anuj.kumar@up.ac.za; gp.hancke@city.edu.hk

RI Hancke, Gerhard/J-7187-2013

OI Hancke, Gerhard/0000-0002-2388-3542

FU University of Pretoria, Pretoria, South Africa

FX This work was supported by the University of Pretoria, Pretoria, South

Africa. The associate editor coordinating the review of this paper and

approving it for publication was Dr. Ashish Pandharipande.

CR [Anonymous], 2013, 401 AAN

Angelis F, 2013, IEEE T IND INFORM, V9, P1518

Arguello-Serrano B, 1999, IEEE T CONTR SYST T, V7, P56, DOI 10.1109/87.736752

[Anonymous], 2004, 552013 ASHRAE

Atthajariyakul S, 2004, ENERG BUILDINGS, V36, P720, DOI 10.1016/j.enbuild.2004.01.017

Bluyssen PM, 2009, INDOOR ENV HDB

Brelieh N., 2013, REHVA J, V50, P16

BRUNDRET.GW, 1974, ELECTRON POWER, V20, P248, DOI 10.1049/ep.1974.0176

Chen C, 2013, IEEE T SMART GRID, V4, P1401, DOI 10.1109/TSG.2013.2265239

Chu CM, 2008, IEEE T POWER SYST, V23, P1356, DOI 10.1109/TPWRS.2008.926432

del Mar Castilla M., 2013, P 39 ANN C IEEE IND, P7908

Donaisky E., 2007, P IEEE INT C CONTR A, P182

Du PW, 2011, IEEE T SMART GRID, V2, P411, DOI 10.1109/TSG.2011.2140344

Duan CX, 2011, C IND ELECT APPL, P1492, DOI 10.1109/ICIEA.2011.5975826

Dunbar M, 2001, IEEE INSTRU MEAS MAG, V4, P19, DOI 10.1109/5289.911169

Eccles LM, 2008, IEEE INSTRU MEAS MAG, V11, P23, DOI 10.1109/MIM.2008.4483730

Figaro Group, 2007, TGS2442 FIAG GROUP, P1

Gardner JW, 2010, IEEE SENS J, V10, P1833, DOI 10.1109/JSEN.2010.2046409

Gomez C, 2010, IEEE COMMUN MAG, V48, P92, DOI 10.1109/MCOM.2010.5473869

HOLLANDE.LJ, 1968, IEEE TRANS IND GEN A, VIGA4, P234, DOI 10.1109/TIGA.1968.4180881

Hong JY, 2009, EXPERT SYST APPL, V36, P8509, DOI 10.1016/j.eswa.2008.10.071

ISO, 1994, 7730 ISO

Kang J, 2000, SENSOR ACTUAT A-PHYS, V82, P302, DOI 10.1016/S0924-4247(00)00289-2

Kishore S, 2010, INT CONF SMART GRID, P443, DOI 10.1109/SMARTGRID.2010.5622084

KON A, 1994, 10TH ANNIVERSARY, IMTC/94 - ADVANCED TECHNOLOGIES IN I & M,

CONFERENCE PROCEEDINGS, VOLS 1-3 AND SUPPLEMENT, P454, DOI 10.1109/IMTC.1994.351922

Kularatna N, 2008, IEEE SENS J, V8, P415, DOI 10.1109/JSEN.2008.917477

Kumar A, 2014, IEEE SENS J, V14, P2557, DOI 10.1109/JSEN.2014.2313348

Kumar A, 2013, IEEE SENS J, V13, P1329, DOI 10.1109/JSEN.2012.2233469

Kumar A, 2011, IEEE SENS J, V11, P2598, DOI 10.1109/JSEN.2011.2148171

Kumar A, 2010, INT J SMART SENS INT, V3, P621

LASSOW W, 1972, IEEE T IND APPL, VIA 8, P504, DOI 10.1109/TIA.1972.349843

Lee D, 2008, SENSORS-BASEL, V8, P6417, DOI 10.3390/s8106417

Lee KB, 2005, IEEE INSTRU MEAS MAG, V8, P14, DOI 10.1109/MIM.2005.1578613

Lee KB, 2000, IEEE T INSTRUM MEAS, V49, P621, DOI 10.1109/19.850405

Lee KB, 2005, IEEE T INSTRUM MEAS, V54, P1527, DOI 10.1109/TIM.2005.851225

Lee KC, 2004, IEEE T IND ELECTRON, V51, P1150, DOI 10.1109/TIE.2004.837879

Liang J., 2005, P IEEE C CONTR APPL, P819

Mukaro R, 1999, IEEE T INSTRUM MEAS, V48, P1232, DOI 10.1109/19.816142

Nikolaou TG, 2012, IEEE T SMART GRID, V3, P2196, DOI 10.1109/TSG.2012.2215059  
 Ramos HMG, 2004, IEEE T INSTRUM MEAS, V53, P1232, DOI 10.1109/TIM.2004.831183  
 Rawi M. I. M., 2011, P COMPUT SCI, V5, P232  
 Reffat R. M., 2001, J PERFORM CONSTR FAC, V15, P104, DOI DOI 10.1061/(ASCE)0887-3828(2001)15:3(104)  
 Roosi S. R., 2009, IEEE T INSTRUM MEAS, V58, P3754  
 [Anonymous], 2009, SIM20 HD V2 02 HARDW  
 Singh MK, 2011, APPL ENERG, V88, P2420, DOI 10.1016/j.apenergy.2011.01.019  
 Song EY, 2008, IEEE INSTRU MEAS MAG, V11, P11, DOI 10.1109/MIM.2008.4483728  
 Tse WL, 2008, SENSOR ACTUAT A-PHYS, V144, P394, DOI 10.1016/j.sna.2008.02.004  
 Tse WL, 2007, MEASUREMENT, V40, P654, DOI 10.1016/j.measurement.2006.07.005  
 Nguyen TA, 2013, ENERG BUILDINGS, V56, P244, DOI 10.1016/j.enbuild.2012.09.005  
 Veitch JA, 2001, J ILLUM ENG SOC, V30, P124, DOI 10.1080/00994480.2001.10748341  
 Wang YF, 2005, IEEE T INSTRUM MEAS, V54, P1321, DOI 10.1109/TIM.2004.839767  
 Whitehouse K, 2012, IEEE DES TEST COMPUT, V29, P17, DOI 10.1109/MDT.2012.2201439  
 Wobschall D, 2008, IEEE INSTRU MEAS MAG, V11, P18  
 NR 53  
 TC 36  
 Z9 36  
 U1 0  
 U2 20  
 PU IEEE-INST ELECTRICAL ELECTRONICS ENGINEERS INC  
 PI PISCATAWAY  
 PA 445 HOES LANE, PISCATAWAY, NJ 08855-4141 USA  
 SN 1530-437X  
 EI 1558-1748  
 J9 IEEE SENS J  
 JI IEEE Sens. J.  
 PD DEC  
 PY 2014  
 VL 14  
 IS 12  
 DI 10.1109/JSEN.2014.2356651  
 PG 8  
 WC Engineering, Electrical & Electronic; Instruments & Instrumentation;  
 Physics, Applied  
 SC Engineering; Instruments & Instrumentation; Physics  
 GA AU5AM  
 UT WOS:000345619500006  
 DA 2018-05-03  
 ER  
  
 PT J  
 AU Dilaver, Z  
 Hunt, LC  
 AF Dilaver, Zafer  
 Hunt, Lester C.  
 TI Modelling and forecasting Turkish residential electricity demand  
 SO ENERGY POLICY  
 LA English  
 DT Article  
 DE Turkish residential electricity demand; Structural time series model  
 (STSM); Energy demand modelling and future scenarios  
 ID DYNAMIC REGRESSION-MODELS; TIME-SERIES ANALYSIS; ENERGY DEMAND;  
 STOCHASTIC TRENDS; SEASONALITY; UK; TURKEY  
 AB This research investigates the relationship between Turkish residential electricity consumption,  
 household total final consumption expenditure and residential electricity prices by applying the structural  
 time series model to annual data over the period from 1960 to 2008. Household total final consumption

expenditure, real energy prices and an underlying energy demand trend are found to be important drivers of Turkish residential electricity demand with the estimated short run and the long run total final consumption expenditure elasticities being 0.38 and 1.57, respectively, and the estimated short run and long run price elasticities being -0.09 and -0.38, respectively. Moreover, the estimated underlying energy demand trend, (which, as far as is known, has not been investigated before for the Turkish residential sector) should be of some benefit to Turkish decision makers in terms of energy planning. It provides information about the impact of past policies, the influence of technical progress, the impacts of changes in consumer behaviour and the effects of changes in economic structure. Furthermore, based on the estimated equation, and different forecast assumptions, it is predicted that Turkish residential electricity demand will be somewhere between 48 and 80 TWh by 2020 compared to 40 TWh in 2008. (C) 2011 Elsevier Ltd. All rights reserved.

C1 [Dilaver, Zafer; Hunt, Lester C.] Univ Surrey, SEEC, Dept Econ, Guildford GU2 7XH, Surrey, England.

[Dilaver, Zafer] Republ Turkey Prime Minist, TR-06573 Ankara, Turkey.

RP Dilaver, Z (reprint author), Univ Surrey, SEEC, Dept Econ, Guildford GU2 7XH, Surrey, England.

EM Z.dilaver@surrey.ac.uk

CR ALTAS M, 1994, 6 TURK EN C EN STAT

Amarawickrama HA, 2008, ENERGY, V33, P724, DOI 10.1016/j.energy.2007.12.008

Box G. E. P., 1976, TIME SERIES ANAL FOR

DILAVER Z, 2009, 10 IAEE EUR C VIENN

Dilaver Z, 2011, ENERG ECON, V33, P426, DOI 10.1016/j.eneco.2010.10.001

Dimitropoulos J, 2005, APPL ECON LETT, V12, P239, DOI 10.1080/1350485052000337789

DOLUN L, 2002, POWER GENERATION TUR

Ediger VS, 2002, ENERG CONVERS MANAGE, V43, P473, DOI 10.1016/S0196-8904(01)00033-4

\*FCO, 2010, TURK COUNTR PROF

Halicioglu F, 2007, ENERG ECON, V29, P199, DOI 10.1016/j.eneco.2006.11.007

Hamzacebi C, 2007, ENERG POLICY, V35, P2009, DOI 10.1016/j.enpol.2006.03.014

Harvey A, 1997, ECON J, V107, P192, DOI 10.1111/1468-0297.00152

HARVEY A, 1993, J AM STAT ASSOC, V88, P1228, DOI 10.2307/2291261

HARVEY A, 1994, ECON J, V104, P1324, DOI 10.2307/2235451

Harvey A, 1989, FORECASTING STRUCTUR

HARVEY AC, 1992, J BUS ECON STAT, V10, P377, DOI 10.2307/1391813

HARVEY AC, 1986, ECON J, V96, P975, DOI 10.2307/2233168

Harvey AC, 1993, HDB STAT, V11, P261, DOI DOI 10.1016/50169-7161(05)80045-8

Hunt LC, 2003, ENERGY J, V24, P63

Hunt LC, 2003, ENERG ECON, V25, P93, DOI 10.1016/S0140-9883(02)00072-5

Hunt L. C., 2003, ENERGY COMPETITIVE M, P140

HUNT LC, 2000, SEEDS99 U SURR DEP E

\*IEA, 2010, EN BAL OECD CONTR

Jalles J.T., 2009, FEUNL WORKING PAPER, Vwp541

Kalman R. E., 1960, J BASIC ENG, V82, P35, DOI [10.1115/1.3662552, DOI 10.1115/1.3662552, 10. 1115/1.3662552]

KELES SM, 2005, ELECT DEMAND FORECAS

Koopman S. J., 2007, STRUCTURAL TIME SERI

Maddala G. S., 1998, UNIT ROOTS COINTEGRA

Rao BB, 2010, APPL ECON, V42, P2193, DOI 10.1080/00036840701765494

\*TEI, 1972, TURK EL I STAT 1957

\*TETC, 2006, TURK EL GEN CAP PROJ

World Bank, 2010, WORLD DEV IND 2009

NR 32

TC 36

Z9 36

U1 2

U2 21

PU ELSEVIER SCI LTD

PI OXFORD

PA THE BOULEVARD, LANGFORD LANE, KIDLINGTON, OXFORD OX5 1GB, OXON, ENGLAND

SN 0301-4215

J9 ENERG POLICY

JI Energy Policy

PD JUN

PY 2011

VL 39

IS 6

BP 3117

EP 3127

DI 10.1016/j.enpol.2011.02.059

PG 11

WC Economics; Energy & Fuels; Environmental Sciences; Environmental Studies

SC Business & Economics; Energy & Fuels; Environmental Sciences & Ecology

GA 774UE

UT WOS:000291411300012

DA 2018-05-03

ER

PT J

AU Menanteau, P

Lefebvre, H

AF Menanteau, P

Lefebvre, H

TI Competing technologies and the diffusion of innovations: the emergence  
of energy-efficient lamps in the residential sector

SO RESEARCH POLICY

LA English

DT Article

DE lighting; technological competition; learning; incentive programmes;  
energy efficiency

ID PROGRESS

AB The emergence of a new lighting technology in the residential sector at the beginning of the 1980s has created a situation of technological competition with an existing and mature technology. Despite specific advantages in terms of durability and energy efficiency, the new compact fluorescent lamp faced numerous adoption barriers when introduced on the market. Further improvement of performance and characteristics has been necessary to reduce these barriers and establish a solid driving force for dissemination. The authors point out the importance of public programmes in this respect, which created initial niche markets and allowed a technological learning process to become established. (C) 2000 Elsevier Science B.V. All rights reserved.

C1 Inst Energy Policy & Econ, Inst Econ & Polit Energie, Natl Ctr Sci Res, F-38040 Grenoble 9, France.

RP Menanteau, P (reprint author), Inst Energy Policy & Econ, Inst Econ & Polit Energie, Natl Ctr Sci Res, BP 47, F-38040 Grenoble 9, France.

OI MENANTEAU, Philippe/0000-0001-6012-0133

CR \*AIE, 1990, UT RAT EN

ANGIOLETTI R, 1997, C MAITR DEM EL RES I, P5

ARROW KJ, 1962, REV ECON STUD, V29, P155, DOI 10.2307/2295952

ARTHUR WB, 1989, ECON J, V99, P116, DOI 10.2307/2234208

BOUWKNEGT A, 1982, J ILLUMINATION ENG S, V14, P43

DAVID PA, 1995, REV EC IND, P27

DIETRICH JG, 1997, C MAITR DEM EL RES I, P95

DOSI G, 1982, RES POLICY, V11, P147, DOI 10.1016/0048-7333(82)90016-6

FERSTORM GB, 1994, ENERGY EFFICIENT LIG, P27

Foray D, 1996, TECHNOL FORECAST SOC, V53, P3, DOI 10.1016/0040-1625(95)00064-X

Foray D., 1989, REV EC IND, V48, P16, DOI 10.3406/rei.1989.2244

FRENKEN LE, 1979, LUX, V101, P14

HERAUD JA, 1992, ECON APPL, V45, P45

JACK AG, 1986, PHILIPS TECH REV, V42, P342

KEMP R, 1992, FUTURES, V24, P437, DOI 10.1016/0016-3287(92)90015-8

KOEDAM M, 1980, REV ECLAIRAGE, V107, P109

LAMARRE L, 1993, EPRI J, P23

LEBAS, 1991, COLLECTION TECHNOLOG  
 LEMAIGREVOREAU P, 1990, ELECT ELECTRIFICATIO  
 LEMAIGREVOREAU P, 1979, REV ECLAIRAGE, V101, P1  
 LEVINE MD, 1995, ANNU REV ENERG ENV, V20, P535  
 \*LIGHT IND FED, 1990, LAMP GUID  
 \*LUX, 1980, LUX REV ECL, V107, P149  
 \*LUX, 1978, LUX REV ECL  
 \*LUX, 1979, LUX REV ECL, V105, P410  
 MEIER AK, 1983, ENERGY, V8, P957, DOI 10.1016/0360-5442(83)90094-4  
 MILLER RB, 1993, CONTEMP EDUC PSYCHOL, V18, P2, DOI 10.1006/ceps.1993.1002  
 NADEL SM, 1993, ENERGY, V18, P145, DOI 10.1016/0360-5442(93)90098-X  
 NELSON RR, 1977, RES POLICY, V6, P36, DOI 10.1016/0048-7333(77)90029-4  
 Rosenberg N., 1976, PERSPECTIVES TECHNOL  
 Rosenberg N., 1982, INSIDE BLACK BOX TEC  
 SAVIOTTI PP, 1994, INNOVATION TECHNOLOG  
 WILHITE H, 1995, ENERGY EFFICIENCY CH  
 NR 33  
 TC 36  
 Z9 36  
 U1 0  
 U2 12  
 PU ELSEVIER SCIENCE BV  
 PI AMSTERDAM  
 PA PO BOX 211, 1000 AE AMSTERDAM, NETHERLANDS  
 SN 0048-7333  
 J9 RES POLICY  
 JI Res. Policy  
 PD MAR  
 PY 2000  
 VL 29  
 IS 3  
 BP 375  
 EP 389  
 DI 10.1016/S0048-7333(99)00038-4  
 PG 15  
 WC Management; Planning & Development  
 SC Business & Economics; Public Administration  
 GA 296XJ  
 UT WOS:000086051800003  
 DA 2018-05-03  
 ER  
  
 PT J  
 AU Berardi, U  
 AF Berardi, Umberto  
 TI Stakeholders' influence on the adoption of energy-saving technologies in  
   Italian homes  
 SO ENERGY POLICY  
 LA English  
 DT Article  
 DE Energy saving technologies; Stakeholder's influence; Technology  
   diffusion  
 ID RESIDENTIAL BUILDINGS; EUROPEAN-UNION; BARRIERS; POLICY; PERFORMANCE;  
   INNOVATION; EFFICIENCY; OPPORTUNITIES; CONSTRUCTION; BEHAVIOR  
 AB The instability and fragmentation of the temporary aggregations of many stakeholders in construction  
   processes are barriers to adopting new technologies. This paper investigates the influence of different  
   stakeholders on the adoption of mature energy-saving technologies in new residential buildings. Recent  
   literature about the influence of different stakeholders on construction processes is reviewed focusing in

their interest for energy saving technologies. To gain an insight into the specific roles played by stakeholders (general contractors, construction firms, architects, users and public governments) in different projects, a case study methodology was used. The influence on the adoption of energy-saving technologies of stakeholders was assessed through semi-structured interviews. These interviews focused on the interest and power for the adoption of several energy-saving technologies. Having recognized that the interest in adoption is often expressed late in the construction processes, the time of introduction of this interest was assessed. This paper provides an empirical insight into significant barriers for the adoption of energy saving technologies which are the low influence of highly motivated stakeholders on the decision of adoption, and the delay at which the interest in energy-saving technologies emerges. Finally, policies to overcome these barriers are suggested. (C) 2013 Elsevier Ltd. All rights reserved.

C1 Worcester Polytech Inst WPI, CEE, Worcester, MA 01609 USA.

RP Berardi, U (reprint author), Worcester Polytech Inst WPI, CEE, 100 Inst Rd, Worcester, MA 01609 USA.

EM uberardi@wpi.edu

RI BERARDI, UMBERTO/G-1972-2017

OI BERARDI, UMBERTO/0000-0002-0508-6195

CR Abeysekera V., 2002, PERSPECTIVES CULTURE, V275, P39

AJZEN I, 1991, ORGAN BEHAV HUM DEC, V50, P179, DOI 10.1016/0749-5978(91)90020-T

Albino V, 2012, BUS STRATEG ENVIRON, V21, P387, DOI 10.1002/bse.1728

Andreu IC, 2004, BUILD RES INF, V32, P313, DOI 10.1080/09613210410001679857

Andrews CJ, 2009, ENERGBUILDINGS, V41, P287, DOI 10.1016/j.enbuild.2008.09.009

Annunziata E., 2013, ENERGY

Anumba C., 2005, AGENTS MULTIAGENT SY

Beerepoot M, 2007, ENERGPOLICY, V35, P4812, DOI 10.1016/j.enpol.2007.04.015

Berardi U, 2011, INT J SUSTAINABLE BU, V2, P276, DOI DOI 10.5390/SUSB.2011.2.4.276

Berardi U., 2013, SUSTAINABLE CITIES S, V8, P1

Berardi U, 2012, SUSTAIN DEV, V20, P411, DOI 10.1002/sd.532

Blank L, 1996, CHANGING BEHAV INDIV

Brown HS, 2008, TECHNOL FORECAST SOC, V75, P107, DOI 10.1016/j.techfore.2006.05.014

Chinyio E, 2009, CONSTRUCTION STAKEHO

Christie L, 2011, BUILD RES INF, V39, P450, DOI 10.1080/09613218.2011.592485

Cole RJ, 2000, BUILD RES INF, V28, P304, DOI 10.1080/096132100418456

Comodi G, 2012, ENERGPOLICY, V51, P737, DOI 10.1016/j.enpol.2012.09.019

Cooke R, 2007, RENEW ENER, V32, P2320, DOI 10.1016/j.renene.2006.12.004

de Blois M, 2011, ARCHIT ENG DES MANAG, V7, P3, DOI 10.3763/aedm.2009.0110

DeCanio SJ, 1998, ENERGPOLICY, V26, P441, DOI 10.1016/S0301-4215(97)00152-3

Engstrom Susanne, 2012, Construction Innovation, V12, P393, DOI 10.1108/14714171211272180

Entrop A. G., 2008, P SB08 MELB

Eurostat, 2010, HOUS STAT

Freeman RE, 2011, STAKEHOLDER THEORY: IMPACT AND PROSPECTS, P212

Gaps S.E., 1998, ENERGPOLICY, V26, P1105

GhaffarianHoseini A, 2013, RENEW SUST ENER REV, V25, P1, DOI 10.1016/j.rser.2013.01.010

Gluch P., 2005, THESIS CHALMERS U TE

Hakkinen T, 2011, BUILD RES INF, V39, P239, DOI 10.1080/09613218.2011.561948

Hauge A.L., 2012, ENERGY EFFICIENCY

IPCC, 2007, SUMM POL CLIM CHANG

Johnson G., 1999, EXPLORING CORPORATE

Kubba S, 2010, LEED (R) PRACTICES, CERTIFICATION, AND ACCREDITATION HANDBOOK, P1

Lee T, 2013, ENERGPOLICY, V52, P363, DOI 10.1016/j.enpol.2012.09.048

Levander E, 2011, CONSTR MANAG ECON, V29, P753, DOI 10.1080/01446193.2011.595423

Lutzkendorf T, 2011, BUILD RES INF, V39, P483, DOI 10.1080/09613218.2011.597206

LUTZENHISER L, 1994, ENERGPOLICY, V22, P867, DOI 10.1016/0301-4215(94)90146-5

Madsen H., 2001, BUSINESS STRATEGY EN, V10, P77, DOI DOI 10.1002/BSE.279

Manseau A., 2005, BUILDING TOMORROW IN

McGilligan C, 2010, ENERGPOLICY, V38, P1272, DOI 10.1016/j.enpol.2009.10.068

Miozzo M, 2002, RES POLICY, V31, P989, DOI 10.1016/S0048-7333(01)00173-1

Mitchell RK, 1997, ACAD MANAGE REV, V22, P853, DOI 10.2307/259247

Mlecnik E, 2010, ENERGPOLICY, V38, P4592, DOI 10.1016/j.enpol.2010.04.015

Mohsini R., 1991, BUILD RES INF, V19, P106



- Murphy L, 2012, ENER POLICY, V45, P459, DOI 10.1016/j.enpol.2012.02.056  
 Nam C. H., 1997, CONSTRUCTION MANAGEM, V15, P259, DOI DOI 10.1080/014461997372999  
 Nemry F, 2010, ENER BUILDINGS, V42, P976, DOI 10.1016/j.enbuild.2010.01.009  
 Newcombe R, 2003, CONSTR MANAG EC, V21, P841, DOI DOI 10.1080/0144619032000072137  
 Olander S., 2005, International Journal of Project Management, V23, P321, DOI  
 10.1016/j.ijproman.2005.02.002  
 Pan W, 2012, ENER POLICY, V45, P594, DOI 10.1016/j.enpol.2012.03.010  
 Parnphumeesup P, 2011, ENER POLICY, V39, P3591, DOI 10.1016/j.enpol.2011.03.060  
 Pinkse J, 2009, BUS STRATEG ENVIRON, V18, P515, DOI 10.1002/bse.615  
 Pries F., 1995, CONSTRUCTION MANAGEM, V13, P43  
 Runhaar H, 2008, BUSINESS STRATEGY EN, V17, P160, DOI DOI 10.1002/BSE.520  
 Svenfelt A, 2011, TECHNOL FORECAST SOC, V78, P785, DOI 10.1016/j.techfore.2010.09.005  
 Toole TM, 1998, J CONSTR ENG M ASCE, V124, P323, DOI 10.1061/(ASCE)0733-9364(1998)124:4(323)  
 Tuominen P, 2012, ENER BUILDINGS, V51, P48, DOI 10.1016/j.enbuild.2012.04.015  
 Vermeulen WJV, 2006, ENER POLICY, V34, P2719, DOI 10.1016/j.enpol.2005.04.009  
 Walker DHT, 2008, CONSTR MANAG ECON, V26, P645, DOI 10.1080/01446190701882390  
 WBSCD, 2009, TRANSF MARK EN EFF B  
 Williams K, 2007, SUSTAIN DEV, V15, P135, DOI 10.1002/sd.308  
 Winch G. M., 2010, MANAGING CONSTRUCTIO  
 Xu P, 2013, ENER POLICY, V52, P667, DOI 10.1016/j.enpol.2012.10.029  
 Yip R. C. P., 2009, J ENV MANAGEMENT ASC, V90, P3616

NR 63

TC 35

Z9 35

U1 3

U2 26

PU ELSEVIER SCI LTD

PI OXFORD

PA THE BOULEVARD, LANGFORD LANE, KIDLINGTON, OXFORD OX5 1GB, OXON, ENGLAND

SN 0301-4215

EI 1873-6777

J9 ENER POLICY

JI Energy Policy

PD SEP

PY 2013

VL 60

BP 520

EP 530

DI 10.1016/j.enpol.2013.04.074

PG 11

WC Economics; Energy &amp; Fuels; Environmental Sciences; Environmental Studies

SC Business &amp; Economics; Energy &amp; Fuels; Environmental Sciences &amp; Ecology

GA 206OB

UT WOS:000323530900052

DA 2018-05-03

ER

PT J

AU Muratori, M

Rizzoni, G

AF Muratori, Matteo

Rizzoni, Giorgio

TI Residential Demand Response: Dynamic Energy Management and Time-Varying

Electricity Pricing

SO IEEE TRANSACTIONS ON POWER SYSTEMS

LA English

DT Article

DE Demand response; electricity pricing; rebound peaks; residential energy

management; TOU and CPP

ID LOAD CONTROL; CONSUMPTION; MARKETS; IMPACTS

AB Demand response programs are currently being proposed as a solution to deal with issues related to peak demand and to improve the operation of the electric power system. In the demand response paradigm, electric utilities provide incentives and benefits to private consumers as a compensation for their flexibility in the timing of their electricity consumption. In this paper, a dynamic energy management framework, based on highly resolved energy consumption models, is used to simulate automated residential demand response. The models estimate the residential demand using a novel bottom-up approach that quantifies consumer energy use behavior, thus providing an accurate estimation of the actual amount of controllable resources. The optimal schedule of all of the controllable appliances, including plug-in electric vehicles, is found by minimizing consumer electricity-related expenditures. Recently, time-varying electricity rate plans have been proposed by electric utilities as an incentive to their customers with the objective of re-shaping the aggregate demand. Large-scale simulations are performed to analyze and quantitatively assess the impact of demand response programs using different electricity price structures. Results show that simple time-varying electricity price structures, coupled with large-scale adoption of automated energy management systems, might create pronounced rebound peaks in the aggregate residential demand. To cope with the rebound peaks created by the synchronization of the individual residential demands, innovative electricity price structures-called Multi-TOU and Multi-CPP-are proposed.

C1 [Muratori, Matteo] Pacific NW Natl Lab, Joint Global Change Res Inst, College Pk, MD 20740 USA.

[Rizzoni, Giorgio] Ohio State Univ, Dept Mech Engr, Columbus, OH 43212 USA.

RP Muratori, M (reprint author), Pacific NW Natl Lab, Joint Global Change Res Inst, College Pk, MD 20740 USA.; Rizzoni, G (reprint author), Ohio State Univ, Dept Mech Engr, Columbus, OH 43212 USA.

EM matteo.muratori@pnnl.gov; rizzoni.1@osu.edu

RI Rizzoni, Giorgio/D-2961-2016

OI Rizzoni, Giorgio/0000-0002-8397-7241

FU National Science Foundation [1029337]

FX This work was performed at The Ohio State University-Center for

Automotive Research supported by the National Science Foundation under Grant 1029337. Paper no. TPWRS-01072-2014.

CR Avci M., 2012, P IEEE ENERGYTECH C

Borenstein S, 2002, J AM CHEM SOC, V128, P4136

CAVES DW, 1984, J ECONOMETRICS, V26, P179, DOI 10.1016/0304-4076(84)90017-4

Chao H., 2010, ELECT J, V23, P7

Du PW, 2011, IEEE T SMART GRID, V2, P411, DOI 10.1109/TSG.2011.2140344

Dutschke E, 2013, ENERG POLICY, V59, P226, DOI 10.1016/j.enpol.2013.03.025

Espey J. A., 2004, Journal of Agricultural and Applied Economics, V36, P65

Gellings C. W., 2004, ELECT J, V17, P70, DOI DOI 10.1016/J.TEJ.2003.11.010

HEFFNER GC, 1985, IEEE T POWER AP SYST, V104, P1602, DOI 10.1109/TPAS.1985.319188

Kassakian J., 2011, FUTURE ELECT GRID IN

Kim TT, 2011, IEEE T SMART GRID, V2, P519, DOI 10.1109/TSG.2011.2159279

Kirschen DS, 2003, IEEE T POWER SYST, V18, P520, DOI 10.1109/TPWRS.2003.810692

Lehnhoff S, 2011, AT-AUTOM, V59, P167, DOI 10.1524/auto.2011.0906

LeMay M., 2008, P 41 HAW INT C SYST, P174

Livengood D, 2009, SERV SCI, V1, P1, DOI DOI 10.1287/SERV.1.1.1

Mishra A., 2013, P 4 INT C FUT EN SYS, P3

Mohsenian-Rad AH, 2010, IEEE T SMART GRID, V1, P120, DOI 10.1109/TSG.2010.2055903

Morales JM, 2014, INT SERIES OPER RES, V205

Muratori M, 2014, THESIS OHIO STATE U

Muratori M., 2013, P ASME DYN SYST CONT

Muratori M, 2014, RENEW SUST ENERG REV, V33, P546, DOI 10.1016/j.rser.2014.02.027

Muratori M, 2013, ENERGY, V58, P168, DOI 10.1016/j.energy.2013.02.055

Muratori M, 2013, APPL ENERG, V107, P465, DOI 10.1016/j.apenergy.2013.02.057

Navigant-Electric Light and Power, 2013, DYN PRIC AD WILL BE

Newsham GR, 2010, ENERG POLICY, V38, P3289, DOI 10.1016/j.enpol.2010.01.027

Roncero J. R., 2008, P IET CIRED SEM SMAR, P1

Schey S., 2012, P 26 EL VEH S LOS AN

Smart Energy Demand Coalition, 2011, DEM RESP SNAPSHOT REAL

Sou KC, 2011, IEEE DECIS CONTR P, P5144, DOI 10.1109/CDC.2011.6161081

Torrity J, 2012, ENERGY, V44, P576, DOI 10.1016/j.energy.2012.05.043  
 Torrity J, 2010, ENERGY, V35, P1575, DOI 10.1016/j.energy.2009.05.021  
 Walawalkar R, 2010, ENERGY, V35, P1553, DOI 10.1016/j.energy.2009.09.017  
 Wolak FA, 2007, RESIDENTIAL CUSTOMER

NR 33

TC 34

Z9 36

U1 6

U2 29

PU IEEE-INST ELECTRICAL ELECTRONICS ENGINEERS INC

PI PISCATAWAY

PA 445 HOES LANE, PISCATAWAY, NJ 08855-4141 USA

SN 0885-8950

EI 1558-0679

J9 IEEE T POWER SYST

JI IEEE Trans. Power Syst.

PD MAR

PY 2016

VL 31

IS 2

BP 1108

EP 1117

DI 10.1109/TPWRS.2015.2414880

PG 10

WC Engineering, Electrical & Electronic

SC Engineering

GA DG4CH

UT WOS:000372017600024

DA 2018-05-03

ER

PT J

AU Veldman, E

Gibescu, M

Slootweg, H

Kling, WL

AF Veldman, Else

Gibescu, Madeleine

Slootweg, Han (J. G. )

Kling, Wil L.

TI Scenario-based modelling of future residential electricity demands and  
 assessing their impact on distribution grids

SO ENERGY POLICY

LA English

DT Article

DE Distribution networks; Energy transition; Load management

ID POWER-SYSTEMS

AB New developments towards a more sustainable energy delivery system require electricity distribution grids that support distributed generation and a potential increase in electricity demand. In this article, the impact of changes in future residential use on the electricity distribution grids is assessed by using a scenario-based methodology to model residential loads. It illustrates that scenarios resulting from varied economic and demographic developments, but also driven by the focus of energy policies, can have considerable consequences on the loading and the resulting required network capacities of electricity distribution grids. A strategy for network operators to cope with these changes and optimise the utilisation of their grids is to use the possibilities to control flexible loads to reduce peak loads and shift demands. This article shows that if these loads can be managed in such way, the electricity profiles can be flattened significantly. For the case of the Netherlands, the peak demands in residential areas can be reduced with 35-67% in various scenarios. Load-flow analyses of medium voltage networks show that a load

management strategy to reduce peak demands can realise a reduction of 21-40% for required capacity of cables and transformers. This makes a reduction 45-72% in investment costs possible. (C) 2013 Elsevier Ltd. All rights reserved.

C1 [Veldman, Else; Slootweg, Han (J. G. ); Kling, Wil L.] Eindhoven Univ Technol, Elect Energy Syst Grp, NL-5600 MB Eindhoven, Netherlands.

[Veldman, Else; Slootweg, Han (J. G. )] Enexis BV, Asset Management Dept, NL-5201 AW sHertogenbosch, Netherlands.

[Gibescu, Madeleine] Delft Univ Technol, Elect Power Syst Grp, NL-2600 GA Delft, Netherlands.

RP Veldman, E (reprint author), Eindhoven Univ Technol, Elect Energy Syst Grp, POB 513, NL-5600 MB Eindhoven, Netherlands.

EM else.veldman@enexis.nl

CR Blokhuis E, 2011, ENER POLICY, V39, P6220, DOI 10.1016/j.enpol.2011.07.021

CE Delft and KEMA, 2012, MAATSCH KOST BAT INT

Cockroft J, 2006, ENER CONVERS MANAGE, V47, P2349, DOI 10.1016/j.enconman.2005.11.021

De Jong A, 2008, ENERGIE CO2 BESPARI

Directorate-General for Energy, 2010, EU EN TRENDS 2030 UP

Dunn B, 2011, SCIENCE, V334, P928, DOI 10.1126/science.1212741

European Climate Foundation, 2010, ROADM 2050 PRACT GUI

Eurlings C.M.P.S., 2009, PLAN AANPAK ELEKT RI

Faber A, 2009, DECENTRALE ELEKTRICI

Faruqui A, 2010, ENER POLICY, V38, P6222, DOI 10.1016/j.enpol.2010.06.010

Government of the Netherlands, 2009, WOONONDERZOEK NED 20

Grond M., 2011, THESIS DELFT U TECHN

Harmsen R., 2009, ENERGIEBESPARING CO2

Solar Holland, 2005, TRANS ZONN ROADM HOL

IEA, 2011, WORLD EN OUTL

IEA, 2011, TECHN ROADM SMART GR

Janssen L., 2006, WELVAART LEEFOMGEVIN

Kersting W. H., 2007, DISTRIBUTION SYSTEM

Lampropoulos I., 2010, INT C INN SUST PROD

Lopes JAP, 2007, ELECTR POW SYST RES, V77, P1189, DOI 10.1016/j.epsr.2006.08.016

McDonald J, 2008, ENER POLICY, V36, P4346, DOI 10.1016/j.enpol.2008.09.038

Ministry of Infrastructure and the Environment, 2009, MOB NED 2009

Morren J., 2011, INT C EL DISTR CIRED

Netbeheer Nederland, 2011, NET TOEK

Rotmans J., 2001, FORESIGHT, V3, P1, DOI DOI 10.1108/14636680110803003

Shaw R, 2010, ENER POLICY, V38, P5927, DOI 10.1016/j.enpol.2010.05.046

Slootweg J.G., 2007, INT C EL DISTR CIRED

Slootweg J.G., 2011, INT C NETW SENS CONT

Slootweg J.G., 2011, INT C EL DISTR CIRED

Stamminger R, 2009, SYNERGY POTENTIAL SM

U. S. Department of Energy, 2009, SMART GRID SYST REP

van Drunen MA, 2011, FUTURES, V43, P488, DOI 10.1016/j.futures.2011.01.001

van Oirsouw P., 2011, NETTEN DISTRIBUTIE E

Veldman E., 2010, COMPETITION REGULATI, V11, P287

Veldman E., 2011, IEEE POWERTECH C TRO

Veldman E., 2011, TRANSM DISTRIB, P44

Verbong G, 2007, ENER POLICY, V35, P1025, DOI 10.1016/j.enpol.2006.02.010

Verdonk M., 2012, REFERENTIERAMING ENE

Verzijlbergh R.A., 2011, IEEE POW EN SOC GEN

Westerga R., 2011, REGELRUIMTE WARMTEPO

[Anonymous], 2011, VISION NETWORK ANAL

NR 41

TC 33

Z9 33

U1 0

U2 27

PU ELSEVIER SCI LTD

PI OXFORD  
 PA THE BOULEVARD, LANGFORD LANE, KIDLINGTON, OXFORD OX5 1GB, OXON, ENGLAND  
 SN 0301-4215  
 J9 ENER POLICY  
 JI Energy Policy  
 PD MAY  
 PY 2013  
 VL 56  
 BP 233  
 EP 247  
 DI 10.1016/j.enpol.2012.12.078  
 PG 15  
 WC Economics; Energy & Fuels; Environmental Sciences; Environmental Studies  
 SC Business & Economics; Energy & Fuels; Environmental Sciences & Ecology  
 GA 120GI  
 UT WOS:000317158400022  
 DA 2018-05-03  
 ER

PT J  
 AU Byun, J  
 Hong, I  
 Lee, B  
 Park, S  
 AF Byun, Jinsung  
 Hong, Insung  
 Lee, Byoungjoo  
 Park, Sehyun  
 TI Intelligent Household LED Lighting System Considering Energy Efficiency  
 and User Satisfaction

SO IEEE TRANSACTIONS ON CONSUMER ELECTRONICS

LA English

DT Article

DE household LED lighting system; situation awareness; minimum light  
 intensity control; adaptive middleware

ID NETWORKS; DESIGN

AB Saving energy has become one of the most important issues these days. The most waste of energy is caused by the inefficient use of the consumer electronics. Particularly, a light accounts for a great part of the total energy consumption. Various light control systems are introduced in current markets, because the installed lighting systems are outdated and energy-inefficient. However, due to architectural limitations, the existing light control systems cannot be successfully applied to home and office buildings. Therefore, this paper proposes an intelligent household LED lighting system considering energy efficiency and user satisfaction. The proposed system utilizes multi sensors and wireless communication technology in order to control an LED light according to the user's state and the surroundings. The proposed LED lighting system can autonomously adjust the minimum light intensity value to enhance both energy efficiency and user satisfaction. We designed and implemented the proposed system in the test bed and measured total power consumption to verify the performance. The proposed LED lighting system reduces total power consumption of the test bed up to 21.9%(1).

C1 [Byun, Jinsung; Hong, Insung] Chung Ang Univ, Sch Elect & Elect Engr, Seoul 156756, South Korea.

[Lee, Byoungjoo] Aurora Design Lab, Seoul, South Korea.

[Park, Sehyun] Chung Ang Univ, Sch Elect & Elect Engr, Ubiquitous Comp & Cipher Internet Lab, Seoul 156756, South Korea.

RP Byun, J (reprint author), Chung Ang Univ, Sch Elect & Elect Engr, Seoul 156756, South Korea.

EM jinsung@wm.cau.ac.kr; axlrose11421@wm.cau.ac.kr;

bjlee@auroradesignlab.com; shpark@cau.ac.kr

FU MKE(The Ministry of Knowledge Economy), Korea, under the

ITRC(Information Technology Research Center) [NIPA-2012-H0301-12-4004];

Human Resources Development of the Korea Institute of Energy Technology

Evaluation and Planning (KETEP); Korea government Ministry of Knowledge Economy [20104010100570]

FX This research was supported by the MKE(The Ministry of Knowledge Economy), Korea, under the ITRC(Information Technology Research Center) support program (NIPA-2012-H0301-12-4004) supervised by the NIPA (National IT Industry Promotion Agency) and by the Human Resources Development of the Korea Institute of Energy Technology Evaluation and Planning (KETEP) grant funded by the Korea government Ministry of Knowledge Economy (20104010100570).

CR Atici C, 2011, IEEE T CONSUM ELECTR, V57, P788

Byun J, 2011, IEEE T CONSUM ELECTR, V57, P90, DOI 10.1109/TCE.2011.5735486

Chen T, 2011, IEEE WIREL COMMUN, V18, P30, DOI 10.1109/MWC.2011.6056690

Delaney Declan T, 2009, P 1 ACM WORKSH EMB S, P61

Denardin G. W., 2009, P IEEE IND APPL SOC, P1

Han J, 2011, IEEE T CONSUM ELECTR, V57, P85, DOI 10.1109/TCE.2011.5735485

Bellido-Outeirino FJ, 2012, IEEE T CONSUM ELECTR, V58, P47, DOI 10.1109/TCE.2012.6170054

Leccese F, 2013, IEEE T POWER DELIVER, V28, P21, DOI 10.1109/TPWRD.2012.2212215

Matta S., 2010, P 36 ANN C IEEE IND, P3316

Pan MS, 2008, IEEE SENS J, V8, P1710, DOI 10.1109/JSEN.2008.2004294

Park TJ, 2009, IEEE T AUTOM SCI ENG, V6, P322, DOI 10.1109/TASE.2008.2008148

Siddiqui A. A., 2012, P INT C ADV COMM TEC, P916

Tompros S, 2009, IEEE NETWORK, V23, P8, DOI 10.1109/MNET.2009.5350347

Uhm Y, 2010, IEEE T CONSUM ELECTR, V56, P231, DOI 10.1109/TCE.2010.5439150

NR 14

TC 33

Z9 34

U1 6

U2 40

PU IEEE-INST ELECTRICAL ELECTRONICS ENGINEERS INC

PI PISCATAWAY

PA 445 HOES LANE, PISCATAWAY, NJ 08855-4141 USA

SN 0098-3063

J9 IEEE T CONSUM ELECTR

JI IEEE Trans. Consum. Electron.

PD FEB

PY 2013

VL 59

IS 1

BP 70

EP 76

DI 10.1109/TCE.2013.6490243

PG 7

WC Engineering, Electrical & Electronic; Telecommunications

SC Engineering; Telecommunications

GA 127AF

UT WOS:000317665000010

DA 2018-05-03

ER

PT J

AU Pelenur, MJ

Cruickshank, HJ

AF Pelenur, Marcos J.

Cruickshank, Heather J.

TI Closing the Energy Efficiency Gap: A study linking demographics with barriers to adopting energy efficiency measures in the home

SO ENERGY

LA English

DT Article

DE Cities; Energy efficiency; Barriers; Demographics; Multi-response

contingency tables; Rao-Scott chi-square test

ID MULTIWAY CONTINGENCY-TABLES; MULTIPLE COLUMN RESPONSES; CHI-SQUARED TESTS; MARGINAL INDEPENDENCE; ASSOCIATION; CONSUMPTION; VARIABLES; BEHAVIOR

AB This paper presents a study which linked demographic variables with barriers affecting the adoption of domestic energy efficiency measures in large UK cities. The aim was to better understand the 'Energy Efficiency Gap' and improve the effectiveness of future energy efficiency initiatives. The data for this study was collected from 198 general population interviews (1.5-10 min) carried out across multiple locations in Manchester and Cardiff. The demographic variables were statistically linked to the identified barriers using a modified chi-square test of association (first order Rao-Scott corrected to compensate for multiple response data), and the effect size was estimated with an odds-ratio test. The results revealed that strong associations exist between demographics and barriers, specifically for the following variables: sex; marital status; education level; type of dwelling; number of occupants in household; residence (rent/own); and location (Manchester/Cardiff). The results and recommendations were aimed at city policy makers, local councils, and members of the construction/retrofit industry who are all working to improve the energy efficiency of the domestic built environment. (C) 2012 Elsevier Ltd. All rights reserved.

C1 [Pelenur, Marcos J.; Cruickshank, Heather J.] Univ Cambridge, Dept Engr, Ctr Sustainable Dev, Cambridge CB2 1PZ, England.

RP Pelenur, MJ (reprint author), Univ Cambridge, Dept Engr, Ctr Sustainable Dev, Trumpington St, Cambridge CB2 1PZ, England.

EM mp542@cam.ac.uk; hjc34@cam.ac.uk

FU EPSRC

FX This research was conducted at the Department of Engineering, Centre for Sustainable Development, University of Cambridge, and is part of the EPSRC funded research project: Re-Engineering the City 2020-2050 (RETROFIT 2050) Urban Foresight and Transition Management. Finally, the authors would like to thank all of the friendly interviewees in Manchester and Cardiff, and the anonymous paper reviewers for their invaluable feedback.

CR Abrahamse W, 2009, J ECON PSYCHOL, V30, P711, DOI 10.1016/j.joep.2009.05.006

Agresti A, 1999, BIOMETRICS, V55, P936, DOI 10.1111/j.0006-341X.1999.00936.x

Allcott H, 2010, SCIENCE, V327, P1204, DOI 10.1126/science.1180775

Baker KJ, 2008, APPL ENERG, V85, P475, DOI 10.1016/j.apenergy.2007.09.004

Bilder CR, 2000, COMMUN STAT-SIMUL C, V29, P1285, DOI 10.1080/03610910008813665

Bilder CR, 2004, BIOMETRICS, V60, P241, DOI 10.1111/j.0006-341X.2004.00147.x

Boyatzis R.E, 1998, TRANSFORMING QUALITA

Burgess J, 2008, ENERG POLICY, V36, P4454, DOI 10.1016/j.enpol.2008.09.039

The Climate Group, 2011, UK GOV COMM LONG TER

Committee on Climate Change, 2011, HOM

Committee on Climate Change, 2011, CLIM CHANG ACT

Darby S, 2010, BUILD RES INF, V38, P442, DOI 10.1080/09613218.2010.492660

Darnton A., 2008, GSR BEHAV CHANGE KNO

Decady YJ, 2000, BIOMETRICS, V56, P893, DOI 10.1111/j.0006-341X.2000.00893.x

Department of Energy and Climate Change, 2010, GREEN DEAL SUMM GOV

European Spatial Planning Observation Network, 2007, BRIT URB PATT POP DA

Faiers A, 2007, ENERG POLICY, V35, P4381, DOI 10.1016/j.enpol.2007.01.003

Fereday J, 2008, INT J QUAL METH, V5, P80, DOI DOI 10.1007/S11136-011-0063-9

Friendly M, 1994, J AM STAT ASSOC, V89, P190, DOI DOI 10.2307/2291215

GUERIN DA, 2000, FAMILY CONSUMER SCI, V29, P48, DOI DOI 10.1177/1077727X00291003

Hargreaves T, 2010, ENERG POLICY, V38, P6111, DOI 10.1016/j.enpol.2010.05.068

Institution of Mechanical Engineers, 2009, UK 2050 EN PLAN MAK

JAFFE AB, 1994, ENERG POLICY, V22, P804, DOI 10.1016/0301-4215(94)90138-4

Kelly MJ, 2009, BUILD RES INF, V37, P196, DOI 10.1080/09613210802645924

Lenzen M, 2006, ENERGY, V31, P181, DOI 10.1016/j.energy.2005.01.009

Lior N, 2010, ENERGY, V35, P3976, DOI 10.1016/j.energy.2010.03.034

Loughin TM, 1998, BIOMETRICS, V54, P630, DOI 10.2307/3109769

LUTZENHISER L, 1992, ENERGY, V17, P47, DOI 10.1016/0360-5442(92)90032-U  
 Madlener R, 2009, ENERGY, V34, P370, DOI 10.1016/j.energy.2008.10.011  
 Marks David F, 2004, RES METHODS CLIN HLT  
 PELENUR M, 2012, P RETROFIT 2012 C SA, P24  
 Pelenur M, 2011, P 6 UNESCO SUST DEV  
 RAO JNK, 1981, J AM STAT ASSOC, V76, P221, DOI 10.2307/2287815  
 RAO JNK, 1984, ANN STAT, V12, P46, DOI 10.1214/aos/1176346391  
 RETROFIT 2050, 2012, REENG CIT 2020 2050  
 Lutzenhiser L., 1998, HUMAN CHOICE CLIMATE, V2, P291  
 Stephenson J, 2010, ENER POLICY, V38, P6120, DOI 10.1016/j.enpol.2010.05.069  
 Stern N, 2006, STERN REV EC CLIMATE  
 Thomas D.R., 2004, INT J TESTING, V4, P43  
 Thomas DR, 2000, STAT SOC CAN P SURV, P121  
 Upham Paul, 2009, PUBLIC ATTITUDES ENV  
 Weber L, 1997, ENER POLICY, V25, P833, DOI 10.1016/S0301-4215(97)00084-0  
 Yates D, 1999, PRACTICE STAT AP T1  
 NR 43  
 TC 33  
 Z9 33  
 U1 3  
 U2 36  
 PU PERGAMON-ELSEVIER SCIENCE LTD  
 PI OXFORD  
 PA THE BOULEVARD, LANGFORD LANE, KIDLINGTON, OXFORD OX5 1GB, ENGLAND  
 SN 0360-5442  
 EI 1873-6785  
 J9 ENERGY  
 JI Energy  
 PD NOV  
 PY 2012  
 VL 47  
 IS 1  
 BP 348  
 EP 357  
 DI 10.1016/j.energy.2012.09.058  
 PG 10  
 WC Thermodynamics; Energy & Fuels  
 SC Thermodynamics; Energy & Fuels  
 GA 074ZR  
 UT WOS:000313854100038  
 DA 2018-05-03  
 ER  
  
 PT J  
 AU Kobus, CBA  
     Klaassen, EAM  
     Mugge, R  
     Schoormans, JPL  
 AF Kobus, Charlotte B. A.  
     Klaassen, Elke A. M.  
     Mugge, Ruth  
     Schoormans, Jan P. L.  
 TI A real-life assessment on the effect of smart appliances for shifting  
     households' electricity demand  
 SO APPLIED ENERGY  
 LA English  
 DT Article  
 DE Longitudinal user study; Demand response; Energy management systems;



Smart appliances

ID SIDE MANAGEMENT; IMPACT; CONSUMPTION; GRIDS; STRATEGIES; VEHICLES;  
FEEDBACK; SAVINGS; PRICES; USERS

AB Today's major developments in the production and demand of electricity in domestic areas make it increasingly important that domestic electricity demand can respond to the availability of electricity. Energy management systems and smart appliances can facilitate this by supporting the user to shift electricity demand of appliances to moments in time when electricity is abundantly available. However, the benefits resulting from domestic demand response depend on household acceptance and behaviour change. This paper explores the real electricity demand shift of households in time and the role of smart appliances to bring about this shift. A longitudinal study was conducted among Dutch households over a period of one year. The households received a dynamic electricity tariff, an energy management system and a smart washing machine. Results show that households shift their usage of the smart washing machine mostly to the day when the sun is shining and electricity is produced by their own solar panels. Households who regularly used automation of the smart washing machine, which implicates that the use of the washing machine is automatically shifted to time periods where electricity supply is abundantly available, were more likely to shift their electricity usage. Furthermore, during the course of one year, the results remained stable, indicating a structural shift in demand. (C) 2015 Elsevier Ltd. All rights reserved.

C1 [Kobus, Charlotte B. A.; Klaassen, Elke A. M.] Enexis BV, Dept Innovat, NL-5201 AW Shertogenbosch, Netherlands.

[Kobus, Charlotte B. A.; Mugge, Ruth; Schoormans, Jan P. L.] Delft Univ Technol, Dept Prod Innovat Management, NL-2628 CE Delft, Netherlands.

[Klaassen, Elke A. M.] Eindhoven Univ Technol, Dept Elect Energy Syst, NL-5600 MB Eindhoven, Netherlands.

RP Kobus, CBA (reprint author), Delft Univ Technol, Dept Prod Innovat Management, Landbergstr 15, NL-2628 CE Delft, Netherlands.

EM charlotte.kobus@enexis.nl

CR Almeida Ad, 2008, RESIDENTIAL MONITORI

AECOM, 2011, EN DEM RES PROJ FIN

Bartusch C, 2014, APPL ENERG, V125, P39, DOI 10.1016/j.apenergy.2014.03.054

Bartusch C, 2011, ENERG POLICY, V39, P5008, DOI 10.1016/j.enpol.2011.06.013

Darby SJ, 2012, ENERG POLICY, V49, P759, DOI 10.1016/j.enpol.2012.07.026

Di Giorgio A, 2014, APPL ENERG, V128, P119, DOI 10.1016/j.apenergy.2014.04.032

ECN Energie-Nederland and NBNL, 2012, EN TRENDS 2012

EPRI, 2008, EPRI, Palo Alto, Patent No. [CA: 2007, 1016264, 20071016264]

Erdinc O, 2014, APPL ENERG, V126, P142, DOI 10.1016/j.apenergy.2014.04.010

Faruqui A, 2010, ENERG POLICY, V38, P10

Faruqui A., 2009, ELECT J, V22, P55

Finn P, 2013, APPL ENERG, V101, P678, DOI 10.1016/j.apenergy.2012.07.004

Gaiser K, 2014, APPL ENERG, V113, P1586, DOI 10.1016/j.apenergy.2013.08.075

Geelen D, 2013, ENERG POLICY, V61, P151, DOI 10.1016/j.enpol.2013.05.107

Giorgio A.D., 2012, APPL ENERG, V96, P92

Gottwalt S, 2011, ENERG POLICY, V39, P8163, DOI 10.1016/j.enpol.2011.10.016

Gyamfi S, 2013, RENEW SUST ENERG REV, V25, P71, DOI 10.1016/j.rser.2013.04.006

Gyamfi S, 2011, ENERG POLICY, V39, P2993, DOI 10.1016/j.enpol.2011.03.012

Kiessling A, 2013, BEITRAGE MOMA TRANSF

Klaassen EAM, 2013, DUBL P 48 INT U POW

Kobus CBA, 2015, INT J SUSTAIN ENG

Kobus CBA, 2013, ERGONOMICS, V56, P451, DOI 10.1080/00140139.2012.721522

Kohlmann J., 2011, INN SMART GRID TECHN

Kollmus A., 2002, ENVIRON EDUC RES, V8, P240

Lockton D, 2010, APPL ERGON, V41, P382, DOI 10.1016/j.apergo.2009.09.001

Mert W, 2008, CONSUMER ACCEPTANCE

Newsham GR, 2010, ENERG POLICY, V38, P3289, DOI 10.1016/j.enpol.2010.01.027

Nilsson A, 2014, APPL ENERG, V122, P17, DOI 10.1016/j.apenergy.2014.01.060

Rastegar M, 2012, APPL ENERG, V96, P45, DOI 10.1016/j.apenergy.2012.01.056

Rogers E. M., 1983, DIFFUSION INNOVATION

Stamminger R., 2008, SYNERGY POTENTIAL SM

Stromback J., 2011, POTENTIAL SMART METE

Thorsnes P, 2012, ENER POLICY, V49, P552, DOI 10.1016/j.enpol.2012.06.062  
Timpe C., 2009, SMART DOMESTIC APPL  
Toft MB, 2014, APPL ENER, V134, P392, DOI 10.1016/j.apenergy.2014.08.048  
van Dam SS, 2010, BUILD RES INF, V38, P458, DOI 10.1080/09613218.2010.494832  
Vassileva I, 2013, APPL ENER, V106, P314, DOI 10.1016/j.apenergy.2013.01.059  
Veldman E, 2013, ENER POLICY, V56, P233, DOI 10.1016/j.enpol.2012.12.078  
Verbong GPJ, 2013, ENER POLICY, V52, P117, DOI 10.1016/j.enpol.2012.05.003  
Verplanken B, 2006, J PUBLIC POLICY MARK, V25, P90, DOI 10.1509/jppm.25.1.90  
Verzijlbergh R, 2014, APPL ENER, V120, P169, DOI 10.1016/j.apenergy.2013.08.020  
Walker G, 2014, ENERGY RES SOC SCI  
Wang JH, 2011, ENER POLICY, V39, P4016, DOI 10.1016/j.enpol.2011.01.042  
Widen J, 2014, APPL ENER, V126, P199, DOI 10.1016/j.apenergy.2014.04.008

NR 44

TC 32

Z9 33

U1 1

U2 29

PU ELSEVIER SCI LTD

PI OXFORD

PA THE BOULEVARD, LANGFORD LANE, KIDLINGTON, OXFORD OX5 1GB, OXON, ENGLAND

SN 0306-2619

EI 1872-9118

J9 APPL ENER

J1 Appl. Energy

PD JUN 1

PY 2015

VL 147

BP 335

EP 343

DI 10.1016/j.apenergy.2015.01.073

PG 9

WC Energy & Fuels; Engineering, Chemical

SC Energy & Fuels; Engineering

GA CH1BB

UT WOS:000353755000031

DA 2018-05-03

ER

PT J

AU Dietz, T

Stern, PC

Weber, EU

AF Dietz, Thomas

Stern, Paul C.

Weber, Elke U.

TI Reducing Carbon-Based Energy Consumption through Changes in Household Behavior

SO DAEDALUS

LA English

DT Article

ID ENVIRONMENTAL-POLICY; US; PERCEPTIONS; TECHNOLOGY; INCENTIVES; EFFICIENCY; EMISSIONS; CHOICES; GREEN

AB Actions by individuals and households to reduce carbon-based energy consumption have the potential to change the picture of U.S. energy consumption and carbon dioxide emissions in the near term. To tap this potential, however, energy policies and programs need to replace outmoded assumptions about what drives human behavior; they must integrate insights from the behavioral and social sciences with those from engineering and economics. This integrated approach has thus far only occasionally been

implemented. This essay summarizes knowledge from the social sciences and from highly successful energy programs to show what the potential is and how it can be achieved.

- C1 [Dietz, Thomas] Michigan State Univ, E Lansing, MI 48824 USA.  
 [Stern, Paul C.] Natl Res Council Natl Acad, Board Environm Change & Soc, Washington, DC 20001 USA.  
 [Stern, Paul C.] Norwegian Univ Sci & Technol, Trondheim, Norway.  
 [Weber, Elke U.] Columbia Univ, Columbia Business Sch, New York, NY 10027 USA.  
 [Weber, Elke U.] Columbia Univ, Psychol & Earth Inst Prof, New York, NY 10027 USA.  
 [Weber, Elke U.] Columbia Univ, Ctr Res Environm Decis, New York, NY 10027 USA.
- RP Dietz, T (reprint author), Michigan State Univ, E Lansing, MI 48824 USA.  
 OI Dietz, Thomas/0000-0001-9399-0784
- CR Allcott H, 2011, J PUBLIC ECON, V95, P1082, DOI 10.1016/j.jpubeco.2011.03.003  
 Attari SZ, 2010, P NATL ACAD SCI USA, V107, P16054, DOI 10.1073/pnas.1001509107  
 Berners-Lee M, 2012, ENERG POLICY, V43, P184, DOI 10.1016/j.enpol.2011.12.054  
 Busch L, 2011, INFRASTRUCT SER, P1  
 Cavoukian Ann, 2010, Identity in the Information Society, V3, P275, DOI 10.1007/s12394-010-0046-y  
 Cialdini RB, 2003, CURR DIR PSYCHOL SCI, V12, P105, DOI 10.1111/1467-8721.01242  
 Dietz T, 2010, P NATL ACAD SCI USA, V107, P16007, DOI 10.1073/pnas.1010651107  
 Dietz T, 2009, P NATL ACAD SCI USA, V106, P18452, DOI 10.1073/pnas.0908738106  
 Dinner I, 2011, J EXP PSYCHOL-APPL, V17, P332, DOI 10.1037/a0024354  
 Ferguson Denise P., 2012, BUSINESS RES YB BUSI, P497  
 Ferraro PJ, 2011, AM ECON REV, V101, P318, DOI 10.1257/aer.101.3.318  
 Figner B, 2010, NAT NEUROSCI, V13, P538, DOI 10.1038/nn.2516  
 Gallagher KS, 2011, J ENVIRON ECON MANAG, V61, P1, DOI 10.1016/j.jeem.2010.05.004  
 Goldstein DG, 2008, HARVARD BUS REV, V86, P99  
 Gonzalez AD, 2011, FOOD POLICY, V36, P562, DOI 10.1016/j.foodpol.2011.07.003  
 Heberlein T.A., 2012, NAVIGATING ENV ATTIT  
 Hirst Eric, 1987, COOPERATION COMMUNIT  
 Jaffe Adam B., 1994, ENERGY POLICY, V22  
 Johnson EJ, 2012, MARKET LETT, V23, P487, DOI 10.1007/s11002-012-9186-1  
 Kempton Willett, 1985, MARRIAGE FAM REV, V9, P116  
 Kintisch E, 2010, SCIENCE, V329, P788, DOI 10.1126/science.329.5993.788  
 Lenski Shoshannah, 2012, ENVIRON RES LETT, V5, p044003+8  
 Lineweber David C., 2011, ELECT J, V24, P92, DOI DOI 10.1016/j.TEJ.2011.09.005  
 National Research Council, 1984, EN US HUM DIM  
 Pichert D, 2008, J ENVIRON PSYCHOL, V28, P63, DOI 10.1016/j.jenvp.2007.09.004  
 Rosa Eugene A., 1984, PUBLIC REACTIONS NUC, P3  
 Shwom RL, 2011, ENVIRON POLIT, V20, P705, DOI 10.1080/09644016.2011.608535  
 Stern PC, 2011, AM PSYCHOL, V66, P303, DOI 10.1037/a0023235  
 Stern PC, 2010, ENVIRON SCI TECHNOL, V44, P4847, DOI 10.1021/es100896p  
 STERN PC, 1986, EVALUATION REV, V10, P147, DOI 10.1177/0193841X8601000201  
 Stern Paul C., 1985, MARRIAGE FAM REV, V9, P27  
 Szasz A., 2007, SHOPPING OUR WAY SAF  
 Thøgersen J, 2009, J CONSUMER POLICY, V32, P141, DOI DOI 10.1007/S10603-009-9101-1  
 Vandenberg MP, 2010, ENVIRON LAW REP, V40, P10547  
 Vine Edward L., 1981, SOLARIZING AM DAVIS  
 Weber Elke, 2012, PSYCHOL BEHAV EC LES  
 Weber EU, 2006, CLIMATIC CHANGE, V77, P103, DOI 10.1007/s10584-006-9060-3  
 Weber E. U., 1997, PSYCHOL PERSPECTIVES, P314  
 Wilson Charles, 2010, FAC CLIM CHANG RESP, P37  
 York R, 2002, SOC SCI QUART, V83, P18, DOI 10.1111/1540-6237.00068  
 York R., 2006, HUMAN ECOLOGY REV, V13, P143  
 Zografakis N, 2008, ENERG POLICY, V36, P3226, DOI 10.1016/j.enpol.2008.04.021

NR 42

TC 32

Z9 32

U1 5

U2 296

PU MIT PRESS

PI CAMBRIDGE  
 PA ONE ROGERS ST, CAMBRIDGE, MA 02142-1209 USA  
 SN 0011-5266  
 EI 1548-6192  
 J9 DAEDALUS-US  
 JI Daedalus  
 PD WIN  
 PY 2013  
 VL 142  
 IS 1  
 BP 78  
 EP 89  
 DI 10.1162/DAED\_a\_00186  
 PG 12  
 WC Humanities, Multidisciplinary; Social Sciences, Interdisciplinary  
 SC Arts & Humanities - Other Topics; Social Sciences - Other Topics  
 GA 073RS  
 UT WOS:000313760800006  
 DA 2018-05-03  
 ER

PT J

AU Pisello, AL

Bobker, M

Cotana, F

AF Pisello, Anna Laura

Bobker, Michael

Cotana, Franco

TI A Building Energy Efficiency Optimization Method by Evaluating the Effective Thermal Zones Occupancy

SO ENERGIES

LA English

DT Article

DE building energy efficiency; dynamic simulation and validation;

post-occupancy evaluation; equipment operations and management

ID RESIDENTIAL BUILDINGS; PERFORMANCE; CONSUMPTION; ENVIRONMENT;

SIMULATION; IMPACT; COMFORT; NETWORK; CHINA; MODEL

AB Building energy efficiency is strongly linked to the operations and control systems, together with the integrated performance of passive and active systems. In new high quality buildings in particular, where these two latter aspects have been already implemented at the design stage, users' perspective, obtained through post-occupancy assessment, has to be considered to reduce whole energy requirement during service life. This research presents an innovative and low-cost methodology to reduce buildings' energy requirements through post-occupancy assessment and optimization of energy operations using effective users' attitudes and requirements as feedback. As a meaningful example, the proposed method is applied to a multipurpose building located in New York City, NY, USA, where real occupancy conditions are assessed. The effectiveness of the method is tested through dynamic simulations using a numerical model of the case study, calibrated through real monitoring data collected on the building. Results show that, for the chosen case study, the method provides optimized building energy operations which allow a reduction of primary energy requirements for HVAC, lighting, room-electricity, and auxiliary supply by about 21%. This paper shows that the proposed strategy represents an effective way to reduce buildings' energy waste, in particular in those complex and high-efficiency buildings that are not performing as well as expected during the concept-design-commissioning stage, in particular due to the lack of feedback after the building handover.

C1 [Pisello, Anna Laura; Cotana, Franco] Univ Perugia, Dept Ind Engn, I-06125 Perugia, Italy.

[Bobker, Michael] CUNY, Bldg Performance Lab, New York, NY 10010 USA.

RP Pisello, AL (reprint author), Univ Perugia, Dept Ind Engn, Via Duranti 67, I-06125 Perugia, Italy.

EM pisello@crbnet.it; michael.bobker@baruch.cuny.edu; cotana@crbnet.it

OI PISELLO, ANNA LAURA/0000-0002-4527-6444; Cotana,

Franco/0000-0001-5705-5537

FU H2CU (Honors Center of Italian Universities)

FX The acknowledgements are due to H2CU (Honors Center of Italian Universities) for supporting the International cooperation among the authors. The authors also thank Vasile Iliaoei and Frederick Waeldner, for providing useful documentation of the building and for the support to the research, and Roberto Barone and Vanessa Romagna for the operative support.

- CR ALwaer H, 2010, BUILD ENVIRON, V45, P799, DOI 10.1016/j.buildenv.2009.08.019  
 Asdrubali F, 2012, ENERGIES, V5, P1864, DOI 10.3390/en5061864  
 [Anonymous], 2005, ASHRAE HDB FUND  
 ASHRAE, 2002, ASHRAE GUID 14 2002  
 Balaras CA, 2001, ASHRAE T, V107, P191  
 Bo-ot LM, 2012, ENERGIES, V5, P3723, DOI 10.3390/en5103723  
 Bordass B, 2001, BUILD RES INF, V29, P114, DOI 10.1080/09613210010008036  
 Chen SY, 2012, ENERGIES, V5, P1648, DOI 10.3390/en5051648  
 Chwieduk D, 2003, APPL ENERG, V76, P211, DOI 10.1016/S0306-2619(03)00059-X  
 Claridge D.E., 2011, P EUR COUNC EN EFF E, V4, P74  
 Cotana F, 2011, INT J PHOTOENERGY, DOI 10.1155/2011/843209  
 Crawley B. D. B., 2000, MANAGER, V42, P49  
 Dall'O G, 2012, ENER BUILDINGS, V54, P234, DOI 10.1016/j.enbuild.2012.08.005  
 Dall'O' G, 2012, SUSTAIN CITIES SOC, V3, P54, DOI 10.1016/j.scs.2012.02.001  
 Deuble MP, 2012, BUILD ENVIRON, V56, P21, DOI 10.1016/j.buildenv.2012.02.029  
 Dominguez S., 2012, ENERGIES, V5, P2263  
 [Anonymous], 2007, INT PERF MEAS VER PR  
 Fink A, 2009, CONDUCT SURVEYS STEP, P1  
 Gill ZM, 2010, BUILD RES INF, V38, P491, DOI 10.1080/09613218.2010.505371  
 Gou ZH, 2012, INDOOR BUILT ENVIRON, V21, P412, DOI 10.1177/1420326X11419311  
 Howard B, 2012, ENER BUILDINGS, V45, P141, DOI 10.1016/j.enbuild.2011.10.061  
 International Panel on Climate Change, 2007, CLIM CHANG 2007 SYNT  
 Kolokotsa D, 2011, SOL ENERGY, V85, P3067, DOI 10.1016/j.solener.2010.09.001  
 Menezes AC, 2012, APPL ENERG, V97, P355, DOI 10.1016/j.apenergy.2011.11.075  
 Murakami Y, 2007, BUILD ENVIRON, V42, P4022, DOI 10.1016/j.buildenv.2006.05.012  
 Newsham GR, 2009, ENER BUILDINGS, V41, P897, DOI 10.1016/j.enbuild.2009.03.014  
 Nexant Inc, 2008, M V GUID MEAS VER FE  
 Ouyang JL, 2009, ENER POLICY, V37, P140, DOI 10.1016/j.enpol.2008.07.041  
 Peschiera G, 2010, ENER BUILDINGS, V42, P1329, DOI 10.1016/j.enbuild.2010.03.001  
 Pisello AL, 2012, SMART SUSTAIN BUILT, V1, P73, DOI 10.1108/20466091211227061  
 Pisello AL, 2012, BUILD ENVIRON, V58, P37, DOI 10.1016/j.buildenv.2012.06.017  
 Pisello AL, 2012, APPL ENERG, V97, P419, DOI 10.1016/j.apenergy.2011.12.094  
 Popescu D, 2012, APPL ENERG, V89, P454, DOI 10.1016/j.apenergy.2011.08.015  
 Raftery P, 2011, ENER BUILDINGS, V43, P3666, DOI 10.1016/j.enbuild.2011.09.039  
 Raftery P, 2011, ENER BUILDINGS, V43, P2356, DOI 10.1016/j.enbuild.2011.05.020  
 Redmann N., 2003, P 3 INT C ENH BUILD  
 Tuohy R.P., 2007, ENERGY BUILD, V39, P823  
 Wang Z, 2012, APPL ENERG, V99, P247, DOI 10.1016/j.apenergy.2012.05.020  
 Wei G., 2002, P 2 INT C ENH BUILD  
 Xu XQ, 2012, ENER BUILDINGS, V55, P637, DOI 10.1016/j.enbuild.2012.09.013  
 Yu Z, 2012, ENER BUILDINGS, V47, P430, DOI 10.1016/j.enbuild.2011.12.018  
 Zalejska-Jonsson A, 2012, BUILD ENVIRON, V58, P135, DOI 10.1016/j.buildenv.2012.07.002

NR 42

TC 32

Z9 32

U1 0

U2 45

PU MDPI AG

PI BASEL

PA POSTFACH, CH-4005 BASEL, SWITZERLAND

SN 1996-1073  
 J9 ENERGIES  
 JI Energies  
 PD DEC  
 PY 2012  
 VL 5  
 IS 12  
 BP 5257  
 EP 5278  
 DI 10.3390/en5125257  
 PG 22  
 WC Energy & Fuels  
 SC Energy & Fuels  
 GA 058AR  
 UT WOS:000312607000021  
 OA gold  
 DA 2018-05-03  
 ER

PT J

AU van Ruijven, B  
 de Vries, B  
 van Vuuren, DP  
 van der Sluijs, JP

AF van Ruijven, Bas  
 de Vries, Bert  
 van Vuuren, Detlef P.  
 van der Sluijs, Jeroen P.

TI A global model for residential energy use: Uncertainty in calibration to regional data

SO ENERGY

LA English

DT Article

DE Uncertainty; Model calibration; Residential energy use

ID ENVIRONMENTAL KUZNETS CURVE; GREENHOUSE-GAS EMISSIONS;

DEVELOPING-COUNTRIES; STYLIZED FACTS; POLICY MODELS; BRAZIL; SCENARIOS;

INDIA; REQUIREMENTS; 21ST-CENTURY

AB Uncertainties in energy demand modelling allow for the development of different models, but also leave room for different calibrations of a single model. We apply an automated model calibration procedure to analyse calibration uncertainty of residential sector energy use modelling in the TIMER 2.0 global energy model. This model simulates energy use on the basis of changes in useful energy intensity, technology development (AEEI) and price responses (PIEEI). We find that different implementations of these factors yield behavioural model results. Model calibration uncertainty is identified as influential source for variation in future projections: amounting 30% to 100% around the best estimate. Energy modellers should systematically account for this and communicate calibration uncertainty ranges. (C) 2009 Elsevier Ltd. All rights reserved.

C1 [van Ruijven, Bas; de Vries, Bert; van Vuuren, Detlef P.] Netherlands Environm Assessment Agcy PBL, NL-3720 BA Bilthoven, Netherlands.

[de Vries, Bert; van der Sluijs, Jeroen P.] Univ Utrecht, Copernicus Inst Sustainable Dev & Innovat, Dept Sci Technol & Soc, NL-3584 CS Utrecht, Netherlands.

RP van Ruijven, B (reprint author), Netherlands Environm Assessment Agcy PBL, POB 1, NL-3720 BA Bilthoven, Netherlands.

EM bas.vanruijven@pbl.nl; bert.devries@pbl.nl; detlef.vanvuuren@pbl.nl;  
 j.p.vandersluijs@uu.nl

RI van Ruijven, Bas/G-8106-2011; van der Sluijs, Jeroen/B-6302-2008; van Vuuren, Detlef/A-4764-2009

OI van Ruijven, Bas/0000-0003-1232-5892; van der Sluijs, Jeroen/0000-0002-1346-5953; van Vuuren, Detlef/0000-0003-0398-2831

- FU Netherlands Environmental Assessment Agency (PBL)
- FX The authors are grateful to Peter Janssen and Peter Heuberger for their contribution to the mathematical analysis and development of the MATLAB tool. This research is financially supported by the Netherlands Environmental Assessment Agency (PBL).
- CR Agenor PR, 2000, WORLD BANK ECON REV, V14, P251, DOI 10.1093/wber/14.2.251
- \*AKINCKOSE MA, 2008, J ASIAN EC, V19, P1
- Azar C, 2003, ENER POLICY, V31, P961, DOI 10.1016/S0301-4215(02)00139-8
- BARLAS Y, 1989, EUR J OPER RES, V42, P59, DOI 10.1016/0377-2217(89)90059-3
- BERNARDINI O, 1993, FUTURES, V25, P431, DOI 10.1016/0016-3287(93)90005-E
- Beven K, 2006, J HYDROL, V320, P18, DOI 10.1016/j.jhydrol.2005.07.007
- BEVEN K, 1992, HYDROL PROCESS, V6, P279, DOI 10.1002/hyp.3360060305
- Brito JO, 1997, BIOMASS BIOENERG, V12, P69, DOI 10.1016/S0961-9534(96)00052-9
- Brockett D., 2002, ACEEE SUMMER STUDY B
- Casman EA, 1999, RISK ANAL, V19, P33
- CPB, 1999, WORLDSC COR VERS
- Criqui P., 2000, INT J GLOBAL ENERGY, V14, P116
- DEVRIES HJM, 2001, TIMER IMAGE ENERGY R
- \*DOE EIA, 2006, ANN EN REV
- DOHERTY J, 2004, PEST MODEL INDIPENDE
- DZIOUBINSKI C, 1999, TRENDS CONSUMPTION P
- Easterly W, 2001, WORLD BANK ECON REV, V15, P177, DOI 10.1093/wber/15.2.177
- Focacci A, 2005, ENER POLICY, V33, P543, DOI 10.1016/j.enpol.2003.08.020
- Gales B, 2007, EUR REV ECON HIST, V11, P219, DOI 10.1017/S1361491607001967
- GOLD HS, 1996, NIR NEWS, V7, P10
- GOLDEMBERG J, 2002, ENERGY SUSTAIN DEV, V4, P55
- GROENENBERG H, 2002, DEV CONVERGENCE BOTT
- Guillaume D. M., 1997, FINANC STOCH, V1, P95
- IEA, 2007, EN US NEW MILL TREND
- \*IEA, 2008, EN STAT NONOECD COUN
- \*IEA, 2008, EN STAT OECD NUMB CO
- International Energy Agency (IEA), 2004, WORLD EN OUTL 2004
- IEA, 2002, EL IND PROV POW MILL
- IPCC, 2000, SPEC REP EM SCEN
- ISAAC M, 2008, ENER POLICY, V37, P507
- JANSSEN PHM, 1995, ECOL MODEL, V83, P55, DOI 10.1016/0304-3800(95)00084-9
- Kainuma M, 2003, CLIMATE POLICY ASSES
- KANDER A, 2000, STRUCTURAL CHANGE EC, V18, P291
- Kann A, 2000, ENVIRON MODEL ASSESS, V5, P29, DOI 10.1023/A:1019041023520
- Kleindorfer GB, 1998, MANAGE SCI, V44, P1087, DOI 10.1287/mnsc.44.8.1087
- KRAM T, 2006, ANAL ENV PRESSURES I
- Lenzen M, 2006, ENERGY, V31, P181, DOI 10.1016/j.energy.2005.01.009
- Loulou R., 2004, DOCUMENTATION MARKAL
- Millennium Ecosystem Assessment (MA), 2005, MILL EC ASS EC HUM W
- MANNE A, 1995, ENER POLICY, V23, P17, DOI 10.1016/0301-4215(95)90763-W
- Manne AS, 2005, CLIMATIC CHANGE, V71, P1, DOI 10.1007/s10584-005-0470-4
- The MathWorks Inc, 2007, OPT TOOLB US GUID
- MAZZUCATO M, 2002, NONLINEAR DYNAMICS P, V6, P197
- MCNEIL MA, 2007, FORECASTING ELECT DE
- Medlock KB, 2001, ENERGY J, V22, P77
- NIST/SEMATECH, 2006, E HDB STAT METH
- \*NSSO, 1989, 489 NSS
- OECD, 2008, OECD ENV OUTL 2030
- Oliva R, 2003, EUR J OPER RES, V151, P552, DOI 10.1016/S0377-2217(02)00622-7
- Pachauri S., 2007, ENERGY ANAL HOUSEHOL
- Parikh KS, 2009, ENERGY, V34, P928, DOI 10.1016/j.energy.2008.11.010
- Poeter E. P., 2005, UCODE 2005 6 OTHER C
- POOLE AD, 1998, ENERGY CONSERVATION

RANA A, 2001, OPSEARCH, V38  
REDDY AKN, 1990, SCI AM, V263, P111  
Refsgaard JC, 2007, ENVIRON MODELL SOFTW, V22, P1543, DOI 10.1016/j.envsoft.2007.02.004  
Refsgaard JC, 2006, ADV WATER RESOUR, V29, P1586, DOI 10.1016/j.advwatres.2005.11.013  
Riahi K, 2000, TECHNOL FORECAST SOC, V63, P175, DOI 10.1016/S0040-1625(99)00111-0  
Risbey J, 2005, ENVIRON MODEL ASSESS, V10, P63, DOI 10.1007/s10666-004-4267-z  
Saltelli A., 2004, SENSITIVITY ANAL PRA  
Schaeffer R, 2005, NAT RESOUR FORUM, V29, P284, DOI 10.1111/j.1477-8947.2005.00141.x  
Schipper LJ, 1996, MITIGATION ADAPTATIO, V1, P167  
Seppala T, 2001, POPUL ENVIRON, V23, P217, DOI 10.1023/A:1012831804794  
SHUKLA PR, 1995, ENERG POLICY, V23, P677, DOI 10.1016/0301-4215(95)00062-N  
Sinton JE, 2003, COMMENTS RECENT ENER  
Sinton J. E., 2004, ENERGY SUSTAIN DEV, V8, P33, DOI DOI 10.1016/S0973-0826(08)60465-2  
Stern DI, 2004, WORLD DEV, V32, P1419, DOI 10.1016/j.worlddev.2004.03.004  
Syri S, 2001, ENERG POLICY, V29, P871, DOI 10.1016/S0301-4215(01)00022-2  
TSANG FT, 1995, INT J FORECASTING, V11, P43, DOI 10.1016/0169-2070(94)02010-M  
Turton H, 2008, ENERGY, V33, P1754, DOI 10.1016/j.energy.2008.07.008  
[Anonymous], 2007, GLOB ENV OUTL ENV DE  
van der Sluijs J, 2005, WATER SCI TECHNOL, V52, P87  
van der Sluijs JP, 2007, ENVIRON MODELL SOFTW, V22, P590, DOI 10.1016/j.envsoft.2005.12.020  
van der Sluijs JP, 2002, FUTURES, V34, P133, DOI 10.1016/S0016-3287(01)00051-9  
Van Ruijven B, 2008, WORLD DEV, V36, P2801, DOI 10.1016/j.worlddev.2008.01.011  
van Vuuren D, 2003, ENERG POLICY, V31, P369, DOI 10.1016/S0301-4215(02)00070-8  
van Vuuren DP, 2008, GLOBAL ENVIRON CHANG, V18, P635, DOI 10.1016/j.gloenvcha.2008.06.001  
van Vuuren DP, 1999, RESOUR POLICY, V25, P239, DOI 10.1016/S0301-4207(99)00031-8  
Van der Sluijs Jeroen, 2006, INTERFACES SCI SOC, P67  
Van der Sluijs J.P., 2002, 410200104 DUTCH NAT  
VANRUIJVEN BJ, ENV MODELIN IN PRESS  
van Ruijven BJ, 2008, ENERGY DEV MODELLING  
Van Vuuren D. P., 2007, ENERGY SYSTEMS CLIMA  
Van Vuuren D.P., 2006, INTEGRATED MODELLING  
VANVUUREN DP, ENERGY POLI IN PRESS  
VANVUUREN DP, 2007, UNCERTAINTY RANGES I  
\*WORLD BANK, 2007, BANK WORLD WORLD DEV  
Worrell E, 2004, ANNU REV ENV RESOUR, V29, P345, DOI 10.1146/annurev.energy.29.062403.102042  
NR 88  
TC 32  
Z9 32  
U1 0  
U2 8  
PU PERGAMON-ELSEVIER SCIENCE LTD  
PI OXFORD  
PA THE BOULEVARD, LANGFORD LANE, KIDLINGTON, OXFORD OX5 1GB, ENGLAND  
SN 0360-5442  
EI 1873-6785  
J9 ENERGY  
JI Energy  
PD JAN  
PY 2010  
VL 35  
IS 1  
BP 269  
EP 282  
DI 10.1016/j.energy.2009.09.019  
PG 14  
WC Thermodynamics; Energy & Fuels  
SC Thermodynamics; Energy & Fuels  
GA 547JT



UT WOS:000273884100030

DA 2018-05-03

ER

PT J

AU Zhao, J

Zhu, N

Wu, Y

AF Zhao, Jing

Zhu, Neng

Wu, Yong

TI Technology line and case analysis of heat metering and energy efficiency retrofit of existing residential buildings in Northern heating areas of China

SO ENERGY POLICY

LA English

DT Article

DE Technology line; Existing residential building; Building energy efficiency retrofit

AB The building area in northern heating areas accounting for 70% of the total land area in China is 6,500,000,000 m<sup>2</sup>. The average heating energy consumption in northern China is 100-200% times more than developed countries in the same latitude. This paper introduced firstly the heat metering and energy efficiency retrofit background of existing residential buildings in northern heating areas of China organized by mohurd and MOF, and then put forward the total principle and contents of retrofit. Through analyzing some retrofit cases in Germany, Poland and China, some technological experiences were summarized and finally a technology line suitable for heat metering and energy efficiency retrofit of existing residential buildings in northern heating areas of China which involved retrofit for heat metering and temperature regulation of heating systems, heat balance of heat source and network, and building envelope was described to provide a systematic, scientific, technological guide for the retrofit projects of 0.15 billion m<sup>2</sup> in "the Eleventh Five-Year Plan" period. (C) 2008 Elsevier Ltd. All rights reserved.

C1 [Zhao, Jing; Zhu, Neng] Tianjin Univ, Sch Environm Sci & Engn, Tianjin 300072, Peoples R China.

[Wu, Yong] Minist Housing & Urban Rural Dev Peoples Republ C, Dept Sci & Technol, Beijing 100835, Peoples R China.

RP Zhao, J (reprint author), Tianjin Univ, Sch Environm Sci & Engn, Tianjin 300072, Peoples R China.

EM zhaojing@tju.edu.cn

CR DANG KC, 2007, CONSTRUCTION SCI TEC, V20, P43

LIU G, 2007, HV AC, V37, P91

Lu S, 2007, HV AC, V37, P20

MA HQ, 2005, HV AC, V36, P87

\*MOC, 1995, EN CONS DES STAND NE

MOHURD, 2008, TECHN GUID HEAT MET

\*MOHURD MOF, 2008, IMPL OP PROM HEAT ME

\*TIANJ YUCH TEN GR, 2007, TIANJ EX RES BUILD E

WU Yong, 2007, RES BUILDING ENERGY

ZHAO B, 2007, CONSTRUCTION SCI TEC, V20, P47

ZHAO B, 2008, TANGSHAN DEMONSTRATI

ZHOU H, 2007, HV AC, V37, P8

NR 12

TC 32

Z9 37

U1 2

U2 17

PU ELSEVIER SCI LTD

PI OXFORD

PA THE BOULEVARD, LANGFORD LANE, KIDLINGTON, OXFORD OX5 1GB, OXON, ENGLAND

SN 0301-4215

J9 ENERG POLICY

J1 Energy Policy

PD JUN  
PY 2009  
VL 37  
IS 6  
BP 2106  
EP 2112  
DI 10.1016/j.enpol.2008.11.045  
PG 7  
WC Economics; Energy & Fuels; Environmental Sciences; Environmental Studies  
SC Business & Economics; Energy & Fuels; Environmental Sciences & Ecology  
GA 448AK  
UT WOS:000266233300011  
DA 2018-05-03  
ER

PT J  
AU DYNER, I  
SMITH, RA  
PENA, GE  
AF DYNER, I  
SMITH, RA  
PENA, GE  
TI SYSTEM DYNAMICS MODELING FOR RESIDENTIAL ENERGY EFFICIENCY ANALYSIS AND  
MANAGEMENT

SO JOURNAL OF THE OPERATIONAL RESEARCH SOCIETY

LA English

DT Article

DE SYSTEM DYNAMICS; SIMULATION; ENERGY PLANNING; ENERGY EFFICIENCY; ENERGY  
SUBSTITUTION; TECHNOLOGY PENETRATION

AB A System Dynamics model to simulate the substitution of installed household appliances by more efficient ones is presented. The model allows the construction of scenarios and also the analyses of several other issues such as: alternatives for technology penetration, electricity consumption growth, gas consumption growth and effects of pricing policies on various energy demands. The proposed methodology has been applied to assist the decision process in relation to gas penetration policies. The model also supports policy making on energy efficiency and it allows the calculation of total energy savings under different scenarios. Furthermore, government underpricing policies on tariffs and appliance acquisition (longer loan terms, lower interest rates and grace periods) may also be analysed.

C1 UNIV NAACL COLOMBIA,BOGOTA,COLOMBIA.

RP DYNER, I (reprint author), LONDON BUSINESS SCH,SUSSEX PL,REGENTS PK,LONDON NW1  
4SA,ENGLAND.

CR Davidsen PI, 1990, SYST DYNAM REV, V6, P66, DOI 10.1002/sdr.4260060105

DYNER I, 1993, P SYSTEM DYNAMICS C, P333

DYNER I, 1990, P SYSTEM DYNAMICS C, P83

FORD A, 1990, OPER RES, V38, P580, DOI 10.1287/opre.38.4.580

Ford A, 1989, SYST DYNAM REV, V5, P1, DOI 10.1002/sdr.4260050102

Forrester J. W., 1961, IND DYNAMICS

HASSETT KA, 1993, ENERG POLICY, V21, P710, DOI 10.1016/0301-4215(93)90294-P

Moxnes E, 1990, SYST DYNAM REV, V6, P44, DOI 10.1002/sdr.4260060104

NAILL R, 1977, MANAGING ENERGY TRAN

NAILL RF, 1992, SYST DYNAM REV, V8, P111, DOI 10.1002/sdr.4260080202

NAILL RF, 1992, SYST DYNAM REV, V8, P1, DOI 10.1002/sdr.4260080102

OLADE, 1992, LATIN AM ENERGY SITU

SMITH R, 1991, PLANNING RESIDENTIAL

Sterman J, 1983, ENERGY SYSTEMS POLIC, V7, P259

NR 14

TC 32

Z9 32

U1 0

U2 8  
 PU STOCKTON PRESS  
 PI BASINGSTOKE  
 PA HOUNDMILLS, BASINGSTOKE, HANTS, ENGLAND RG21 2XS  
 SN 0160-5682  
 J9 J OPER RES SOC  
 JJ J. Oper. Res. Soc.  
 PD OCT  
 PY 1995  
 VL 46  
 IS 10  
 BP 1163  
 EP 1173  
 DI 10.1057/jors.1995.165  
 PG 11  
 WC Management; Operations Research & Management Science  
 SC Business & Economics; Operations Research & Management Science  
 GA RX135  
 UT WOS:A1995RX13500001  
 DA 2018-05-03  
 ER

PT J  
 AU Rocha, P  
     Siddiqui, A  
     Stadler, M  
 AF Rocha, Paula  
     Siddiqui, Afzal  
     Stadler, Michael  
 TI Improving energy efficiency via smart building energy management  
   systems: A comparison with policy measures  
 SO ENERGY AND BUILDINGS  
 LA English  
 DT Article  
 DE Smart building energy management; Dynamic energy consumption;  
   Energy-efficiency policy measures; Non-linear optimisation  
 ID MICROGRIDS; SIMULATION; POWER

AB To foster the transition to more sustainable energy systems, policymakers have been approving measures to improve energy efficiency as well as promoting smart grids. In this setting, building managers are encouraged to adapt their energy operations to real-time market and weather conditions. Yet, most fail to do so as they rely on conventional building energy management systems (BEMS) that have static temperature set points for heating and cooling equipment. In this paper, we investigate how effective policy measures are at improving building-level energy efficiency compared to a smart BEMS with dynamic temperature set points. To this end, we present an integrated optimisation model mimicking the smart BEMS that combines decisions on heating and cooling systems operations with decisions on energy sourcing. Using data from an Austrian and a Spanish building, we find that the smart BEMS results in greater reduction in energy consumption than a conventional BEMS with policy measures. (C) 2014 The Authors. Published by Elsevier B.V. This is an open access article under the CC BY license (<http://creativecommons.org/licenses/by/3.0/>).

C1 [Rocha, Paula; Siddiqui, Afzal] UCL, Dept Stat Sci, London, England.  
 [Siddiqui, Afzal] Stockholm Univ, Dept Comp & Syst Sci, S-10691 Stockholm, Sweden.  
 [Stadler, Michael] Ctr Energy & Innovat Technol, Hofamt Priel, Austria.  
 [Stadler, Michael] Ernesto Orlando Lawrence Berkeley Natl Lab, Berkeley, CA USA.

RP Siddiqui, A (reprint author), UCL, Dept Stat Sci, London, England.  
 EM p.rocha@ucl.ac.uk; afzal.siddiqui@ucl.ac.uk; MStadler@cet.or.at  
 OI Siddiqui, Afzal/0000-0003-1841-1310; Rocha, Paula/0000-0003-3498-6077  
 FU European Union Seventh Framework Programme [260041]; Austrian Federal  
 Ministry for Transport, Innovation, and Technology through the "Building

of Tomorrow" program; Theodor Kery Foundation of the province of Burgenland

FX The research leading to these results has received funding from the European Union Seventh Framework Programme under grant agreement no. 260041 for Collaborative Project "Energy Efficiency and Risk Management in Public Buildings" (EnRiMa). The Center for Energy and Innovative Technologies (CET) is supported by the Austrian Federal Ministry for Transport, Innovation, and Technology through the "Building of Tomorrow" program and by the Theodor Kery Foundation of the province of Burgenland. Cooperation of Fundacion Asturiana de Atencion y Proteccion a Personas con Discapacidades y/o Dependencias (Siero, Asturias, Spain), Fachhochschule Burgenland's Pinkafeld campus (Burgenland, Austria), and Fachhochschule Technikum Wien's ENERGYbase facility (Vienna, Austria) has greatly enhanced our understanding of energy management at the building level. Feedback from Ruud Egging (SINTEF and NTNU) has helped to improve this paper. We are also grateful for comments provided by two anonymous reviewers. All remaining errors are the authors' own.

CR BOE, 2013, AG EST BOL OF EST

Cano Emilio L., 2014, Computational Management Science, V11, P25, DOI 10.1007/s10287-013-0177-3

Crawley DB, 2001, ENERGBUILDINGS, V33, P319, DOI 10.1016/S0378-7788(00)00114-6

DIN, 2003, 4421 DIN EN

EC, 2011, STAND MAND EUR STAND

Engdahl F, 2004, ENERGBUILDINGS, V36, P205, DOI 10.1016/j.enbuild.2003.09.007

Groissbock M, 2014, J ENERGENG, V140, DOI 10.1061/(ASCE)EY.1943-7897.0000143

Guo W, 2010, ENERGBUILDINGS, V42, P189, DOI 10.1016/j.enbuild.2009.08.014

King DE, 2007, J ENERGENG-ASCE, V133, P150, DOI 10.1061/(ASCE)0733-9402(2007)133:3(150)

Liang Y, 2012, ENERGENG, V33, P61, DOI 10.5547/01956574.33.4.4

Linden A., 2009, 200941 SVENSK FJARRV

Livengood D, 2009, SERV SCI, V1, P1, DOI DOI 10.1287/SERV.1.1.1

Marnay C, 2008, IEEE T POWER SYST, V23, P975, DOI 10.1109/TPWRS.2008.922654

Platt G, 2010, ENERGBUILDINGS, V42, P412, DOI 10.1016/j.enbuild.2009.10.009

Stadler M, 2011, EUR T ELECTR POWER, V21, P1291, DOI 10.1002/etep.418

Tanaka M, 2013, ENERGENG, V39, P187, DOI 10.1016/j.eneco.2013.05.004

Werner A., 2014, ENERGY J, V35, P79

Woodman B, 2011, ENERGPOLICY, V39, P3914, DOI 10.1016/j.enpol.2011.03.074

Xu BP, 2008, ENERGBUILDINGS, V40, P1755, DOI 10.1016/j.enbuild.2008.03.004

NR 19

TC 31

Z9 31

U1 3

U2 24

PU ELSEVIER SCIENCE SA

PI LAUSANNE

PA PO BOX 564, 1001 LAUSANNE, SWITZERLAND

SN 0378-7788

EI 1872-6178

J9 ENERGBUILDINGS

J1 Energy Build.

PD FEB 1

PY 2015

VL 88

BP 203

EP 213

DI 10.1016/j.enbuild.2014.11.077

PG 11

WC Construction & Building Technology; Energy & Fuels; Engineering, Civil

SC Construction & Building Technology; Energy & Fuels; Engineering

GA CB6JA

UT WOS:000349732100020

OA gold

DA 2018-05-03

ER

PT J

AU Li, C

Hong, TZ

Yan, D

AF Li, Cheng

Hong, Tianzhen

Yan, Da

TI An insight into actual energy use and its drivers in high-performance buildings

SO APPLIED ENERGY

LA English

DT Article

DE Actual energy use; Building technologies; Driving factors; High-performance buildings; Integrated design; Performance rating

ID TRENDS

AB Using portfolio analysis and individual detailed case studies, we studied the energy performance and drivers of energy use in 51 high-performance office buildings in the U.S., Europe, China, and other parts of Asia. Portfolio analyses revealed that actual site energy use intensity (EUI) of the study buildings varied by a factor of as much as 11, indicating significant variation in real energy use in HPBs worldwide. Nearly half of the buildings did not meet the American Society of Heating, Refrigerating, and Air Conditioning Engineers (ASHRAE) Standard 90.1-2004 energy target, raising questions about whether a building's certification as high performing accurately indicates that a building is energy efficient and suggesting that improvement in the design and operation of HPBs is needed to realize their energy-saving potential. We studied the influence of climate, building size, and building technologies on building energy performance and found that although all are important, none are decisive factors in building energy use. EUIs were widely scattered in all climate zones. There was a trend toward low energy use in small buildings, but the correlation was not absolute; some small HPBs exhibited high energy use, and some large HPBs exhibited low energy use. We were unable to identify a set of efficient technologies that correlated directly to low EUIs. In two case studies, we investigated the influence of occupant behavior as well as operation and maintenance on energy performance and found that both play significant roles in realizing energy savings. We conclude that no single factor determines the actual energy performance of HPBs, and adding multiple efficient technologies does not necessarily improve building energy performance; therefore, an integrated design approach that takes account of climate, technology, occupant behavior, and operations and maintenance practices should be implemented to maximize energy savings in HPBs. These findings are intended to help architects, engineers, operators, and policy makers improve the design and operation of HPBs. (C) 2014 Elsevier Ltd. All rights reserved.

C1 [Li, Cheng; Hong, Tianzhen] Univ Calif Berkeley, Lawrence Berkeley Natl Lab, Environm Energy Technol Div, Berkeley, CA 94720 USA.

[Yan, Da] Tsinghua Univ, Beijing 100084, Peoples R China.

RP Hong, TZ (reprint author), Univ Calif Berkeley, Lawrence Berkeley Natl Lab, Environm Energy Technol Div, 1 Cyclotron Rd, Berkeley, CA 94720 USA.

EM thong@LBL.gov

RI Yan, Da/M-8147-2017

OI Hong, Tianzhen/0000-0003-1886-9137

FU United States Department of Energy [DE-AC02-05CH11231]; China Ministry of Housing and Urban - Rural Development; Ministry of Science & Technology under the U.S.-China Clean Energy Research Center for Building Energy Efficiency [2010DFA72740-02]

FX This work was sponsored by the United States Department of Energy (Contract No. DE-AC02-05CH11231) and the China Ministry of Housing and Urban - Rural Development and the Ministry of Science & Technology (Grant No. 2010DFA72740-02) under the U.S.-China Clean Energy Research Center for Building Energy Efficiency. Data and information on the

CalSTRS building were provided by David Hill of Jones Lang LaSalle. Some data on Chinese buildings were provided by Qi Zhang of Tsinghua University, China.

- CR Alter L, 2013, LEED BASHING IS BANK  
 ASHRAE, 2004, 9012004 ASHRAE  
 ASHRAE, 2010, 9012010 ASHRAE  
 Barbarino A., 2013, BOA TOWER ENERGY GUZ  
 Brown RE, 2003, ENER POLICY, V31, P849, DOI 10.1016/S0301-4215(02)00129-5  
 The Center for the Built Environment at the University of California Berkeley, 2011, CAS STUD CALSTRS HEA  
 Damiens J, 2013, USING PASSIVE DESIGN  
 Diamond R., 2011, EVALUATING ENERGY PE  
 Diamond RC, 2013, BUILDINGS, V3, P639, DOI 10.3390/buildings3030639  
 Fowler K, 2008, ASSESSING GREEN BUIL  
 Fowler K., 2010, REASSESSING GREEN BU  
 [Anonymous], 2008, ASS GREEN BUILD PERF  
 Heerwagen J., 2005, HUMAN FACTORS SUSTAI  
 Hong TZ, 2014, APPL ENER, V126, P90, DOI 10.1016/j.apenergy.2014.03.052  
 Hong TZ, 2013, APPL ENER, V111, P333, DOI 10.1016/j.apenergy.2013.05.019  
 Hong TZ, 2000, BUILD ENVIRON, V35, P347, DOI 10.1016/S0360-1323(99)00023-2  
 Industrial Economics Incorporated, 2005, AN GREEN BUILD PROGR  
 International Energy Agency, 2013, DROP  
 [Anonymous], 2010, WORLD EN OUTL 2010  
 Legislative Research Commission, 2009, EN EFF BUILD DES CON  
 Li DHW, 2013, ENERGY, V54, P1, DOI 10.1016/j.energy.2013.01.070  
 Lin HW, 2013, APPL ENER, V111, P515, DOI 10.1016/j.apenergy.2013.05.040  
 Navarro M, 2009, NY TIMES  
 New Building Institute (NBI), 2012, GETT ZER 2012 STAT U  
 Newsham GR, 2009, ENER BUILDINGS, V41, P897, DOI 10.1016/j.enbuild.2009.03.014  
 Peterman A, 2012, ENER POLICY, V43, P415, DOI 10.1016/j.enpol.2012.01.026  
 Rainwater B., 2008, LOCAL LEADERS SUSTAI  
 Scofield J.H., 2009, INT EN PROGR EV C PO  
 Scofield JH, 2009, ENER BUILDINGS, V41, P1386, DOI 10.1016/j.enbuild.2009.08.006  
 Thilakarathne R, 2011, PROCEDIA ENGINEER, V21, P1136, DOI 10.1016/j.proeng.2011.11.2122  
 Torcellini P. A., 2006, LESSONS LEARNED FIEL  
 Turner C., 2008, ENERGY PERFORMANCE L  
 Turner C., 2006, LEED BUILDING PERFOR  
 Donlad Bren School of Environmental Science & Management University of California Santa Barbara, 2012, GREEN BUILD US CHIN  
 U. S. Department of Energy, 2010, EN EFF TRENDS RES CO  
 U.S. Department of Energy, 2011, 9012010 ASHRAE US DE  
 U.S. Energy Information Administration, 2003, COMM BUILD EN CONS S  
 U.S. Environmental Protection Agency, 2011, EN STAR PERF RAT TEC  
 U. S. EPA, 2007, EN STAR PERF RAT TEC  
 U.S. Environmental Protection Agency, EN STAR LAB BUILD PL  
 [Anonymous], DIR LEED NC BUILD  
 US Green Building Council. U.S. Green Building Council, LEED EX BUILD  
 Xiao J, 2013, STUDY POST OCCUPANCY  
 Yudelson J., 2013, WORLDS GREENEST BUIL  
 [Anonymous], 2013, EN CONS BUILD COMM S
- NR 45  
 TC 31  
 Z9 31  
 U1 1  
 U2 23  
 PU ELSEVIER SCI LTD  
 PI OXFORD  
 PA THE BOULEVARD, LANGFORD LANE, KIDLINGTON, OXFORD OX5 1GB, OXON, ENGLAND

SN 0306-2619  
 EI 1872-9118  
 J9 APPL ENERG  
 JI Appl. Energy  
 PD OCT 15  
 PY 2014  
 VL 131  
 BP 394  
 EP 410  
 DI 10.1016/j.apenergy.2014.06.032  
 PG 17  
 WC Energy & Fuels; Engineering, Chemical  
 SC Energy & Fuels; Engineering  
 GA AO4TY  
 UT WOS:000341335500036  
 DA 2018-05-03  
 ER

PT J  
 AU McMichael, M  
     Shipworth, D  
 AF McMichael, Megan  
     Shipworth, David  
 TI The value of social networks in the diffusion of energy-efficiency  
     innovations in UK households

SO ENERGY POLICY

LA English

DT Article

DE Residential energy demand; Social capital; Energy-efficiency innovations

ID INFORMATION; POLICY; BEHAVIOR; MODEL; TIES

AB The UK Government has policy goals for increasing energy efficiency in existing homes. However, there are doubts that standard technology and behavioural innovations will be adopted widely enough in time to achieve the targets. Diffusion of innovation theory states that the communication of information on innovations through a social system encourages adoption. Social capital theory states that interpersonal communication is a key means of gaining resources, such as information on energy-efficiency innovations, for attaining certain goals. Case study research of three British communities was conducted in 2009 in order to understand the influence of social capital on information diffusion regarding the adoption of household energy-efficiency measures. The findings show that while standard campaigns may account for two-thirds of information-seeking behaviour, they may not be addressing up to one-third of information-seekers who would prefer to speak to people they know. Findings also indicate that seeking information amongst personal contacts is often associated with adoption of energy-efficiency innovations, increasing the likelihood of adoption by up to four times, but that there are important differences between types of innovations and communities. Tailoring campaigns to communities' communication channels is therefore imperative. These findings have important implications for informing community-based energy-efficiency programmes. (C) 2012 Elsevier Ltd. All rights reserved.

C1 [McMichael, Megan; Shipworth, David] UCL, UCL Energy Inst, London WC1H 0NN, England.

RP Shipworth, D (reprint author), UCL, UCL Energy Inst, Cent House, 14 Upper Woburn Pl, London WC1H 0NN, England.

EM d.shipworth@ucl.ac.uk

OI Shipworth, David/0000-0001-9380-9949

CR Abrahamse W, 2007, J ENVIRON PSYCHOL, V27, P265, DOI 10.1016/j.jenvp.2007.08.002

Ball R., 1999, NZ EC PAPERS, V33, P5

Boardman B., 2005, 40 HOUSE

BROWN JJ, 1987, J CONSUM RES, V14, P350, DOI 10.1086/209118

Bryman A, 2008, SOCIAL RES METHODS

Bryman A., 2001, QUANTITATIVE DATA AN

BURT RS, 1984, SOC NETWORKS, V6, P293, DOI 10.1016/0378-8733(84)90007-8

Cabinet Office DECC DCLG, 2011, BEH CHANG EN US

Cialdini RB, 2003, CURR DIR PSYCHOL SCI, V12, P105, DOI 10.1111/1467-8721.01242  
 Coltrane S., 1986, ENER POLICY, V12, P133  
 CURTIS FA, 1984, ENER POLICY, V12, P452, DOI 10.1016/0301-4215(84)90109-5  
 Darby S, 2006, ENER POLICY, V34, P2929, DOI 10.1016/j.enpol.2005.04.013  
 DARLEY JM, 1981, J SOC ISSUES, V37, P150, DOI 10.1111/j.1540-4560.1981.tb02630.x  
 DCLG DECC, 2010, WARM HOM GREEN HOM G  
 Dearing JW, 2008, J PUBLIC HEALTH MAN, V14, P99, DOI 10.1097/01.PHH.0000311886.98627.b7  
 DECC (Department of Energy and Climate Change), 2009, UK LOW CARB TRANS PL  
 Department of Energy and Climate Change (DECC), 2010, LOW CARB COMM CHALL  
 Defra, 2006, CLIM CHANG UK PROGR  
 Defra, 2007, UK EN EFF ACT PLAN 2  
 DETR (Department of the Environment Transport and the Regions), 2000, CLIM CHANG UK PROGR  
 De Vaus D.A., 2002, SURVEYS SOCIAL RES  
 Dietz T, 2009, P NATL ACAD SCI USA, V106, P18452, DOI 10.1073/pnas.0908738106  
 Dillman D., 2000, MAIL INTERNET SURVEY  
 DILLMAN DA, 1991, ANNU REV SOCIOL, V17, P225, DOI 10.1146/annurev.so.17.080191.001301  
 Ek K, 2010, ENER POLICY, V38, P1578, DOI 10.1016/j.enpol.2009.11.041  
 Faiers A, 2007, ENER POLICY, V35, P4381, DOI 10.1016/j.enpol.2007.01.003  
 Fell D., 2009, 2 DEP ENV FOOD RUR A  
 Field A., 2009, DISCOVERING STAT USI  
 Fishbein M., 1975, BELIEF ATTITUDE INTE  
 House of Lords Science and Technology Committee, 2011, BEHAV CHANGE  
 Jackson T., 2005, MOTIVATING SUSTAINAB  
 JAFFE AB, 1994, ENER POLICY, V22, P804, DOI 10.1016/0301-4215(94)90138-4  
 Johnson C. A., 2004, INFORM RES, V10  
 Kellett J, 2007, J ENVIRON PLANN MAN, V50, P381, DOI 10.1080/09640560701261679  
 Lin N., 1999, CONNECTIONS, V22, P28, DOI DOI 10.1108/14691930410550381  
 Lin N., 2001, SOCIAL CAPITAL THEOR  
 Lin SJ, 2005, J AM SOC INF SCI TEC, V56, P393, DOI 10.1002/asi.20127  
 Lockwood M., 2009, GREEN STREETS FINAL  
 Lynn Peter, 1995, J R STAT SOC D-STAT, V44, P173  
 Macleay I., 2011, DIGEST UK ENERGY STA  
 McMichael M., 2011, THESIS U COLL LONDON  
 The Electricity and Gas (Community Energy Saving Programme) Order, 2009, 20091905 SI OFF PUBL  
 [Ofgem 2008], 2008, REV EN EFF COMM 2005  
 PEZZULLO JC, 2009, 2 WAY CONTINGENCY TA  
 Putnam R.D., 2000, BOWLING ALONE COLLAP  
 Rambo E., 2003, P 2003 INT EN PROGR, P469  
 Raw G., 2011, EDRP APPENDIX D SSE  
 Rogers E., 2003, DIFFUSION INNOVATION  
 Shipworth M, 2000, MOTIVATING HOME ENER  
 Simmons E., 2004, INCENTIVE PAYMENTS S  
 STERN PC, 1986, J POLICY ANAL MANAG, V5, P200, DOI 10.2307/3323541  
 Vandenberg MP, 2010, ENVIRON LAW REP, V40, P10547  
 Van der Gaag M., 2008, SOCIAL CAPITAL INT R, P27  
 van der Gaag MPJ, 2008, SOCIAL CAPITAL HLTH, P29  
 VANRAAIJ WF, 1983, J ECON PSYCHOL, V3, P39, DOI 10.1016/0167-4870(83)90057-0  
 van Rijnsoever F., 2008, INNOVATION STUDIES U  
 Wallace AA, 2010, LOCAL ENVIRON, V15, P403, DOI 10.1080/13549831003735387  
 WEENIG MWH, 1993, J APPL SOC PSYCHOL, V23, P1712, DOI 10.1111/j.1559-1816.1993.tb01062.x  
 WEENIG MWH, 1991, J PERS SOC PSYCHOL, V61, P734, DOI 10.1037//0022-3514.61.5.734  
 Woolcock M, 2000, WORLD BANK RES OBSER, V15, P225, DOI 10.1093/wbro/15.2.225  
 Yin R. K., 2003, CASE STUDY RES DESIG

NR 61

TC 31

Z9 31

U1 2

U2 62



PU ELSEVIER SCI LTD  
 PI OXFORD  
 PA THE BOULEVARD, LANGFORD LANE, KIDLINGTON, OXFORD OX5 1GB, OXON, ENGLAND  
 SN 0301-4215  
 J9 ENER POLICY  
 JI Energy Policy  
 PD FEB  
 PY 2013  
 VL 53  
 BP 159  
 EP 168  
 DI 10.1016/j.enpol.2012.10.039  
 PG 10  
 WC Economics; Energy & Fuels; Environmental Sciences; Environmental Studies  
 SC Business & Economics; Energy & Fuels; Environmental Sciences & Ecology  
 GA 079SP  
 UT WOS:000314192800015  
 DA 2018-05-03  
 ER

PT J  
 AU Wada, K  
 Akimoto, K  
 Sano, F  
 Oda, J  
 Homma, T  
 AF Wada, Kenichi  
 Akimoto, Keigo  
 Sano, Fuminori  
 Oda, Junichiro  
 Homma, Takashi

TI Energy efficiency opportunities in the residential sector and their  
 feasibility

SO ENERGY  
 LA English  
 DT Article

DE Energy efficiency; CO2 mitigation; Climate change  
 ID DISCOUNT RATES

AB The objective of this paper is to address the question of what would be the real impact of energy efficiency improvements on the reduction of GHG (greenhouse gas) emissions through the deployment of energy-efficient technologies. We study the cost effectiveness of replacing current appliances with more efficient models, taking into consideration the implicit discount rate observed in people's purchasing behavior. This is followed by a discussion of why the efficiency gap exists and how large it is. If the world were to successfully implement every negative- or zero-cost measure, the CO<sub>2</sub> abatement potential in the global residential and commercial sector in 2020, on a conservative estimate, would be 1.4 Gt of CO<sub>2</sub>, roughly equivalent to the current CO<sub>2</sub> emissions of India as the world fourth largest emitter. If a longer payback period is allowed, a further 1.2 Gt of opportunities, which almost amount to the current CO<sub>2</sub> emissions of Japan as the world's fifth largest emitter of CO<sub>2</sub>, could be gained globally at below zero-cost in 2020. (C) 2012 Elsevier Ltd. All rights reserved.

C1 [Wada, Kenichi; Akimoto, Keigo; Sano, Fuminori; Oda, Junichiro; Homma, Takashi] Res Inst Innovat Technol Earth RITE, Syst Anal Grp, Kizugawa, Kyoto 6190292, Japan.

RP Wada, K (reprint author), Res Inst Innovat Technol Earth RITE, Syst Anal Grp, 9-2 Kizugawadai, Kizugawa, Kyoto 6190292, Japan.

EM wada@rite.or.jp

CR Akimoto K, 2008, CLIM POLICY, V8, P46

Akimoto K, 2010, ENER POLICY, V38, P3384, DOI 10.1016/j.enpol.2010.02.012

Little Arthur D, 1984, RP1587 EL POW RES I

BEGGS SD, 1980, TRANSPORT RES A-POL, V14, P389, DOI 10.1016/0191-2607(80)90057-6

Carson R.T., 2009, J NEUROSCI PSICHOL E, V2, P112, DOI DOI 10.1037/A0017685  
 Dubin J., 1992, WORKING PAPERS CALTE  
 DUBIN JA, 1984, ECONOMETRICA, V52, P345, DOI 10.2307/1911493  
 Ekholm T., 2009, IR09007 IIASA  
 Epper T., 2011, 16 IED  
 Farrell D., 2007, MCKINSEY Q  
 Frederick S, 2002, J ECON LIT, V40, P351, DOI 10.1257/002205102320161311  
 Gillingham K, 2009, ANNU REV RESOUR ECON, V1, P597, DOI 10.1146/annurev.resource.102308.124234  
 Goett A, 1984, EA2512 EL POW RES I  
 HASSETT KA, 1993, ENERG POLICY, V21, P710, DOI 10.1016/0301-4215(93)90294-P  
 HAUSMAN JA, 1979, BELL J ECON, V10, P33, DOI 10.2307/3003318  
 [Anonymous], 2010, EN TECHN PERSP 2010  
 International Energy Agency, 2009, GADG GIG POL EN EFF  
 International Energy Agency, 2006, LIGHTS LAB LOST POL  
 International Energy Agency and Agence francaise de developpement (AFD), 2008, PROM EN EFF INV  
 CAS  
 Jaffe A. B., 2004, ENCY ENERGY, V2, P79, DOI [10.1016/B0-12-176480-X/00228-X, DOI 10.1016/B0-12-176480-X/00228-X]  
 KAHNEMAN D, 1979, ECONOMETRICA, V47, P263, DOI 10.2307/1914185  
 Laibson D, 1997, Q J ECON, V112, P443, DOI 10.1162/003355397555253  
 McKinsey & Company, 2009, PATHW LOW CARB EC VE  
 RITE, 2010, RITE GLOB CO2 EM OUT  
 Ruderman H., 1987, ENERGY J, V8, P101  
 SANSTAD AH, 1995, ENERG POLICY, V23, P739, DOI 10.1016/0301-4215(95)00065-Q  
 Sutherland RJ, 2003, 504 CAT I  
 TRAIN K, 1985, ENERGY, V10, P1243, DOI 10.1016/0360-5442(85)90135-5

NR 28

TC 31

Z9 31

U1 1

U2 16

PU PERGAMON-ELSEVIER SCIENCE LTD

PI OXFORD

PA THE BOULEVARD, LANGFORD LANE, KIDLINGTON, OXFORD OX5 1GB, ENGLAND

SN 0360-5442

J9 ENERGY

JI Energy

PD DEC

PY 2012

VL 48

IS 1

BP 5

EP 10

DI 10.1016/j.energy.2012.01.046

PG 6

WC Thermodynamics; Energy &amp; Fuels

SC Thermodynamics; Energy &amp; Fuels

GA 069UE

UT WOS:000313461800002

DA 2018-05-03

ER

PT J

AU Min, J

Hausfather, Z

Lin, QF

AF Min, Jihoon

Hausfather, Zeke

Lin, Qi Feng

TI A High-Resolution Statistical Model of Residential Energy End Use

Characteristics for the United States

SO JOURNAL OF INDUSTRIAL ECOLOGY

LA English

DT Article

DE electricity; energy efficiency; energy modeling; geographic information systems; industrial ecology; information and communication technology (ICT)

ID CONSUMPTION; SECTOR; FUEL

AB P>The absence of detailed information on residential energy end use characteristics for the United States has in the past presented an impediment to the effective development and targeting of residential energy efficiency programs. This article presents a framework for modeling space heating, cooling, water heating, and appliance energy end uses, fuels used, and carbon emissions at a zip code-level resolution for the entire United States. It combines a regression-based statistical model derived from Residential Energy Consumption Survey data with U.S. census 2000 five-digit zip code level information, climate division-level temperature data, and other sources. The results show large variations in energy use characteristics both between and within different regions of the country, with particularly notable differences in the magnitude of and distribution by fuel of residential energy use in urban and rural areas. The results are validated against residential energy sales data and have useful implications for both residential energy efficiency planning and further study of variations in use patterns.

C1 [Min, Jihoon; Hausfather, Zeke; Lin, Qi Feng] Efficiency 2 0, New York, NY 10009 USA.

RP Hausfather, Z (reprint author), Efficiency 2 0, 128 E 7th St, New York, NY 10009 USA.

EM zeke@efficiency20.com

OI Hausfather, Zeke/0000-0002-2926-0581; Min, Jihoon/0000-0002-0020-1174

CR BAUMERT K, 2003, CLIMATE ANAL IND TOO

BROWN MA, 2008, 39 GEORG TECH U I AL

DOUTHITT RA, 1989, ENERGY, V14, P187, DOI 10.1016/0360-5442(89)90062-5

\*EIA, 1996, RES EN CONS SURV QUA, pCH9

\*EIA, 2009, ADJ SAL DIST FUEL OI

\*EIA, 2008, RES EN CONS SURV PUB

\*EIA, 2009, NAT GAS NAV

EIA, 2009, US CARB DIOX EM EN S

\*EIA, 2009, EIA861 US DEP EN

Energy Information Administration (EIA), 2009, ANN EN REV

\*EIA, 2009, EL POW IND 2007 YEAR

\*EN EFF REN EN, 2010, EN SAV YOUR HOME EL

Ewing R, 2003, AM J PUBLIC HEALTH, V93, P1541, DOI 10.2105/AJPH.93.9.1541

Ewing R, 2008, HOUS POLICY DEBATE, V19, P1, DOI 10.1080/10511482.2008.9521624

Gurney KR, 2009, ENVIRON SCI TECHNOL, V43, P5535, DOI 10.1021/es900806c

Anderson R. E., 1995, MULTIVARIATE DATA AN

Heiple S, 2008, ENERG BUILDINGS, V40, P1426, DOI 10.1016/j.enbuild.2008.01.005

HIRST E, 1978, SIMULATION, V30, P69, DOI 10.1177/003754977803000301

Larsen BM, 2004, ENERG ECON, V26, P179, DOI 10.1016/j.eneco.2004.02.001

Meier PJ, 2002, THESIS U WISCONSIN M

Menard S., 2002, APPL LOGISTIC REGRES

Mills E., 2008, LBNL51938

\*NAT CLIM DAT CTR, 2009, DAIL MEAN TEMP CLIM

Parshall L, 2010, ENERG POLICY, V38, P4765, DOI 10.1016/j.enpol.2009.07.006

Simon M. K., 2006, PROBABILITY DISTRIBU

Swan LG, 2009, RENEW SUST ENERG REV, V13, P1819, DOI 10.1016/j.rser.2008.09.033

\*US BUR CENS, 2007, 2000 CENS POP HOUS S, pCH8

US Census Bureau, 2000, CENS 2000 SUMM FIL 3

\*US ENV PROT AG, 2009, EGRID2007 VERS 1 1

\*US NAT AC SCI NAT, 2008, REV SIT POINT OF US

NR 30

TC 31

Z9 31

U1 2  
 U2 23  
 PU WILEY-BLACKWELL PUBLISHING, INC  
 PI MALDEN  
 PA COMMERCE PLACE, 350 MAIN ST, MALDEN 02148, MA USA  
 SN 1088-1980  
 J9 J IND ECOL  
 JI J. Ind. Ecol.  
 PD OCT  
 PY 2010  
 VL 14  
 IS 5  
 SI SI  
 BP 791  
 EP +  
 DI 10.1111/j.1530-9290.2010.00279.x  
 PG 18  
 WC GREEN & SUSTAINABLE SCIENCE & TECHNOLOGY; Engineering, Environmental;  
 Environmental Sciences  
 SC Science & Technology - Other Topics; Engineering; Environmental Sciences  
 & Ecology  
 GA 673VQ  
 UT WOS:000283692700010  
 OA gold  
 DA 2018-05-03  
 ER  
 FN Clarivate Analytics Web of Science  
 VR 1.0  
 PT J  
 AU Crosbie, T  
 AF Crosbie, Tracey  
 TI Household energy consumption and consumer electronics: The case of  
 television  
 SO ENERGY POLICY  
 LA English  
 DT Article  
 DE consumer electronics; televisions; household energy consumption  
 AB In recent years, there has been a dramatic rise in the number of consumer electronics in households. These new technologies and the services that support them enable new highly energy intensive behaviours. Using in-depth interview data collected from 20 households in 2006, this paper explores these energy intensive behaviours, using the example of the use of televisions. In doing so, it illustrates how the design and marketing of consumer electronics, and the services which support them, actively encourage energy intensive behaviours and how householders are reconfiguring their homes and lifestyles to fit these behaviours. This latter point is significant because, as householders change their homes and daily lives to fit energy intensive consuming behaviours, it will become increasingly difficult to encourage people to reduce their household energy consumption. This paper concludes with the implications of the research findings for policies designed to reduce household energy consumption. (C) 2008 Elsevier Ltd. All rights reserved.  
 C1 Univ Manchester, MARC, Sch Environm & Dev, Manchester M13 9PL, Lancs, England.  
 RP Crosbie, T (reprint author), Univ Manchester, MARC, Sch Environm & Dev, Oxford Rd, Manchester M13 9PL, Lancs, England.  
 EM Tracey.Crosbie@manchester.ic.uk  
 OI Crosbie, Tracey/0000-0002-9355-4816  
 CR \*3M, 2007, LEARN BOUT LCD TVS  
 BOARDMAN B, 1997, COLD LABELLING UK EX  
 Charter M., 1999, J SUSTAINABLE PRODUC, V10, P17  
 \*CHILDWISE, 2008, 200708 CHILDWISE  
 CROSBIE T, INT J TECHN IN PRESS

\*DEFRA, 2007, INT TASKF SUST PROD  
 \*DIG TEL GROUP, 2006, ROL INT DIG TEL SETS  
 \*DIGITALUK, 2007, DIG SWITCH PROGR PRO  
 \*DISPL, 2007, SHIPM LARG TFT LCD P  
 DTI, 2002, EN CONS UK  
 DTI (Department of Trade and Industry), 2006, EN CHALL EN REV REP  
 \*DTI, 2005, REG ENV IMP ASS TIM  
 \*EN SAV TRUST, 2006, HAB LIF TIM  
 ERDMANN J, 2007, MEASURING ENERGY CON  
 European Commission, 2005, DOING MOR LESS GREEN  
 FIRTH S, 2008, ENERB BUILDINGS, V10, P926  
 \*FOXNEWS COM, 2006, CATH RAY TUB TV FORM  
 \*GUARD, 2007, MANY GADG HAV YOU GO  
 \*I PROSP TECHN STU, 2003, ENV TECHN MARK AN CO  
 \*IEA, 2004, TRENDS US SET TOP BO  
 IEA, 2007, FACT SHEET STANDB PO  
 \*IEA, 2007, INT WORKSH EN EFF SE  
 \*MARK TRANSF PROGR, 2007, MTP DEFR RET IN ENC  
 \*MARK TRANSF PROGR, 2006, UK EN CONS DOM TVS  
 \*MARK TRANSF PROGR, 2006, BNTV01 TEL FUT STOCK  
 MEIER A, 1999, HOME ENERGY MAGA MAY  
 NUIJ R., 2001, J SUSTAINABLE PRODUC, V1, P49  
 \*OFCOM, 2005, COMM MARK 2005 2 RAD  
 \*OFF NAT STAT, 2006, SURV ENGL HOUS PROV  
 OWEN P, 2006, RISE MACHINES REV EN  
 Owen P., 2007, AMPERE STRIKES BACK  
 Patton M. Q., 1990, QUALITATIVE EVALUATI  
 RICKER T, 2006, DIGITAL TELEVISION 2  
 Roberts DF, 2005, GENERATION M MEDIA L  
 ROSEN K, 2000, LBNL45988  
 \*SHOP COM, 2007, PHIL 50 HD READ PLAS  
 \*SHOPM, 2007, EL AUD VID ENT TEL H  
 US EPA, 2006, PREL TEL MARK IND RE  
 \*VAT19, 2007, AMB SER  
 2006, SUNDAY TIMES 0709

NR 40

TC 31

Z9 32

U1 0

U2 4

PU ELSEVIER SCI LTD

PI OXFORD

PA THE BOULEVARD, LANGFORD LANE, KIDLINGTON, OXFORD OX5 1GB, OXON, ENGLAND

SN 0301-4215

J9 ENERB POLICY

JI Energy Policy

PD JUN

PY 2008

VL 36

IS 6

BP 2191

EP 2199

DI 10.1016/j.enpol.2008.02.010

PG 9

WC Economics; Energy &amp; Fuels; Environmental Sciences; Environmental Studies

SC Business &amp; Economics; Energy &amp; Fuels; Environmental Sciences &amp; Ecology

GA 317IP

UT WOS:000257013600034

DA 2018-05-03  
ER

PT J

AU Azar, E  
Menassa, CC

AF Azar, Elie  
Menassa, Carol C.

TI A comprehensive framework to quantify energy savings potential from improved operations of commercial building stocks

SO ENERGY POLICY

LA English

DT Article

DE Energy savings quantification; Energy conservation; Commercial building stocks; Operation-focused interventions; Energy management; Occupancy interventions

ID PERFORMANCE SIMULATION; OFFICE BUILDINGS; CONSUMPTION; BEHAVIOR; MODELS

AB While studies highlight the significant impact of actions performed by occupants and facility managers on building energy performance, current policies ignore the importance of human actions and the potential energy savings from a more efficient operation of building systems. This is mainly attributed to the lack of methods that evaluate non-technological drivers of energy use for large stocks of commercial buildings to support policy making efforts. Therefore, this study proposes a scientific approach to quantifying the energy savings potential due to improved operations of any stock of commercial buildings. The proposed framework combines energy modeling techniques, studies on human actions in buildings, and surveying and sampling methods. The contributions of this study to energy policy are significant as they reinforce the role of human actions in energy conservation, and support efforts to integrate operation-focused solutions in energy conservation policy frameworks. The framework's capabilities are illustrated in a case study performed on the stock of office buildings in the United States (US). Results indicate a potential 21 percent reduction in the current energy use levels of these buildings through realistic changes in current building operation patterns. (C) 2013 Elsevier Ltd. All rights reserved.

C1 [Azar, Elie] Univ Wisconsin Madison, Dept Civil & Environm Engr, Madison, WI 53706 USA.  
[Menassa, Carol C.] Univ Michigan, Dept Civil & Environm Engr, Ann Arbor, MI 48109 USA.

RP Menassa, CC (reprint author), Univ Michigan, Dept Civil & Environm Engr, 2350 Hayward St, Ann Arbor, MI 48109 USA.

EM eazar@wisc.edu; menassa@umich.edu

FU US National Science Foundation (NSF) [CBET 1132734, CMMI-BRIGE 1125478];  
Wisconsin Alumni Research Foundation (WARF)

FX The authors would like to acknowledge the financial support for this research received from the US National Science Foundation (NSF) CBET 1132734 and CMMI-BRIGE 1125478 awards, and the Wisconsin Alumni Research Foundation (WARF). Any opinions and findings in this paper are those of the authors and do not necessarily represent those of NSF or WARF.

CR Allcott H, 2010, SCIENCE, V327, P1204, DOI 10.1126/science.1180775

ASHRAE, 2002, GUID 14 2007 MEAS EN

ASHRAE, 2007, 55 2007 THERM ENV CO

ASHRAE, 2007, 90 1 2007 EN STAND B

Augenbroe G, 2009, J ENG DES TECHNOL, V7, P21, DOI 10.1108/17260530910947240

Azar E, 2012, ENERGBUILDINGS, V55, P841, DOI 10.1016/j.enbuild.2012.10.002

Cabinet Office, 2011, BEH CHANG EN US

Carbon Trust, 2006, UK CLIM CHANG PROGR

Carrico AR, 2011, J ENVIRON PSYCHOL, V31, P1, DOI 10.1016/j.jenvp.2010.11.004

Commission of the European Communities (CEC), 2006, COMM COMM ACT PLAN E

Colmenar-Santos A, 2013, ENERGBUILDINGS, V56, P66, DOI 10.1016/j.enbuild.2012.10.004

Crawley DB, 2008, BUILD ENVIRON, V43, P661, DOI 10.1016/j.buildenv.2006.10.027

Daouas N, 2011, APPL ENERGBUILDINGS, V88, P156, DOI 10.1016/j.apenergy.2010.07.030

Deru M., 2011, US DEP ENERGY COMMERC

Eisenhower B, 2012, J BUILD PERFORM SIMU, V5, P171, DOI 10.1080/19401493.2010.549964

Escriva-Escriva G, 2010, ENERGBUILDINGS, V42, P2258, DOI 10.1016/j.enbuild.2010.07.023

Granade H. C., 2009, UNLOCKING ENERGY EFF  
 Granderson J, 2011, ENER EFFIC, V4, P17, DOI 10.1007/s12053-010-9084-4  
 Gynther L, 2012, ENER EFFIC, V5, P67, DOI 10.1007/s12053-011-9115-9  
 Henze G. P., 2001, ARCHIT ENG, V7, P97  
 Neto AH, 2008, ENER BUILDINGS, V40, P2169, DOI 10.1016/j.enbuild.2008.06.013  
 Hoes P, 2009, ENER BUILDINGS, V41, P295, DOI 10.1016/j.enbuild.2008.09.008  
 Health and Safety Executive Board (HSE), 2009, HSE REV CURR APPR WO  
 IPCC, 2007, IPCC 4 ASS REP AR4  
 Jarnagin R.E., 2010, 9012010 ANSIASHRAEIE  
 Jennings A. M., 2011, REDUCTION CARBON DIO  
 Levine M., 2007, CLIMATE CHANGE 2007  
 Lohr SL, 2010, SAMPLING DESIGN ANAL  
 Lopes MAR, 2012, RENEW SUST ENER REV, V16, P4095, DOI 10.1016/j.rser.2012.03.034  
 Marsden PV, 2010, HANDBOOK OF SURVEY RESEARCH, 2ND EDITION, P1  
 Masoso OT, 2010, ENER BUILDINGS, V42, P173, DOI 10.1016/j.enbuild.2009.08.009  
 Moezzi M, 2009, BEHAV ASSUMPTIONS EN  
 Ng LC, 2013, ENER BUILDINGS, V58, P11, DOI 10.1016/j.enbuild.2012.11.035  
 NREL, 2011, US DEP EN COMM REF B  
 Oldewurtel F, 2012, ENER BUILDINGS, V45, P15, DOI 10.1016/j.enbuild.2011.09.022  
 Peng C., 2011, BUILD SIMUL, V5, P85  
 Sanchez M., 2007, 2006 ACEEE SUMMER ST  
 Saporito A, 2001, ENER BUILDINGS, V33, P267, DOI 10.1016/S0378-7788(00)00091-8  
 Staats H, 2000, J APPL BEHAV ANAL, V33, P101, DOI 10.1901/jaba.2000.33-101  
 Turner C., 2008, ENERGY PERFORMANCE L  
 Ucci M., 2012, BUILD SERV ENG RES T, P1  
 Ueno T, 2006, APPL ENER, V83, P166, DOI 10.1016/j.apenergy.2005.02.002  
 Urge-Vorsatz D, 2009, ENER EFFIC, V2, P293, DOI 10.1007/s12053-009-9051-0  
 US Department of Energy (DOE), 2013, COMM BUILD IN  
 United States Department of Energy, 2010, GUID DET CLIM REG CO  
 U.S. Energy Information Administration (EIA), 2013, 2012 ANN EN OUTL  
 US Energy Information Administration (EIA), 2003, US CLIM ZON 2003 CBE  
 US Energy Information Administration (EIA), 2013, EN EXPL YOUR GUID UN  
 U. S. Energy Information Administration, 2003, COMM BUILD EN CONS S  
 US Environmental Protection Agency (EPA), 2010, ENERGY STAT OTH CLIM  
 Wang G, 2012, ENER BUILDINGS, V49, P310, DOI 10.1016/j.enbuild.2012.02.024  
 Webber CA, 2006, ENERGY, V31, P2823, DOI 10.1016/j.energy.2005.11.007  
 Yoon J, 2003, J SOL ENER-T ASME, V125, P251, DOI 10.1115/1.1564076  
 Yudelson J., 2010, GREENING EXISTING BU  
 Zhang T, 2011, ENER BUILDINGS, V43, P2882, DOI 10.1016/j.enbuild.2011.07.007

NR 55

TC 30

Z9 30

U1 3

U2 23

PU ELSEVIER SCI LTD

PI OXFORD

PA THE BOULEVARD, LANGFORD LANE, KIDLINGTON, OXFORD OX5 1GB, OXON, ENGLAND

SN 0301-4215

EI 1873-6777

J9 ENER POLICY

JI Energy Policy

PD APR

PY 2014

VL 67

BP 459

EP 472

DI 10.1016/j.enpol.2013.12.031

PG 14

WC Economics; Energy & Fuels; Environmental Sciences; Environmental Studies  
 SC Business & Economics; Energy & Fuels; Environmental Sciences & Ecology  
 GA AC8WH  
 UT WOS:000332815300044  
 DA 2018-05-03  
 ER

PT J

AU Lin, HW

Hong, TZ

AF Lin, Hung-Wen

Hong, Tianzhen

TI On variations of space-heating energy use in office buildings

SO APPLIED ENERGY

LA English

DT Article

DE Building simulation; Design and operation; EnergyPlus; Office buildings;

Performance benchmarking; Space heating

ID COMMERCIAL BUILDINGS; CLIMATES; CONSUMPTION; DISTRICT; SYSTEMS

AB Space heating is the largest energy end use, consuming more than seven quintillion joules of site energy annually in the U.S. building sector. A few recent studies showed discrepancies in simulated space-heating energy use among different building energy modeling programs, and the simulated results are suspected to be underpredicting reality. While various uncertainties are associated with building simulations, especially when simulations are performed by different modelers using different simulation programs for buildings with different configurations, it is crucial to identify and evaluate key driving factors to space-heating energy use in order to support the design and operation of low-energy buildings. In this study, 10 design and operation parameters for space-heating systems of two prototypical office buildings in each of three U.S. heating climates are identified and evaluated, using building simulations with EnergyPlus, to determine the most influential parameters and their impacts on variations of space-heating energy use. The influence of annual weather change on space-heating energy is also investigated using 30-year actual weather data. The simulated space-heating energy use is further benchmarked against those from similar actual office buildings in two U.S. commercial-building databases to better understand the discrepancies between simulated and actual energy use. In summary, variations of both the simulated and actual space-heating energy use of office buildings in all three heating climates can be very large. However these variations are mostly driven by a few influential parameters related to building design and operation. The findings provide insights for building designers, owners, operators, and energy policy makers to make better decisions on energy-efficiency technologies to reduce space-heating energy use for both new and existing buildings. (C) 2013 Elsevier Ltd. All rights reserved.

C1 [Lin, Hung-Wen] Ind Technol Res Inst, Green Energy & Environm Res Labs, Intelligent Energy Saving Syst Div, Hsinchu 31040, Taiwan.

[Hong, Tianzhen] Univ Calif Berkeley, Lawrence Berkeley Natl Lab, Environm Energy Technol Div, Berkeley, CA 94720 USA.

RP Hong, TZ (reprint author), Univ Calif Berkeley, Lawrence Berkeley Natl Lab, Environm Energy Technol Div, 1 Cyclotron Rd, Berkeley, CA 94720 USA.

EM thong@LBL.gov

FU U.S. Department of Energy under the U.S.-China Clean Energy Research Center on Building Energy Efficiency; Bureau of Energy, Ministry of Economic Affairs, Taiwan, ROC

FX This work was supported by the U.S. Department of Energy under the U.S.-China Clean Energy Research Center on Building Energy Efficiency. It was co-sponsored by the Bureau of Energy, Ministry of Economic Affairs, Taiwan, ROC.

CR Andrews CJ, 2009, ENERGBUILDINGS, V41, P287, DOI 10.1016/j.enbuild.2008.09.009

[Anonymous], 1989, 9011989 ANSIASHRAEIE

Branco G, 2004, ENERGBUILDINGS, V36, P543, DOI 10.1016/j.enbuild.2004.01.028

California Energy Commission, 2005, BUILD EN EFF STAND R

[Anonymous], 2005, ADV VAR AIR VOL SYST

Dai XZ, 2009, ENERGPOLICY, V37, P2073, DOI 10.1016/j.enpol.2009.02.008



Dovjak M, 2010, ENER POLICY, V38, P2998, DOI 10.1016/j.enpol.2010.01.039  
Energy Information Administration (EIA), 2008, 0384 EIA US DEP EN  
Emmerich S.J., 2005, NISTIR7238  
Eskin N, 2008, ENER BUILDINGS, V40, P763, DOI 10.1016/j.enbuild.2007.05.008  
Field K, 2010, 4 NAT C IBPSA US, P85  
Fisher SM, 2006, PLUG LOAD REDUCTION, P119  
Heller J., 2011, SENSITIVITY ANAL COM  
Lam JC, 2000, BUILD ENVIRON, V35, P19, DOI 10.1016/S0360-1323(98)00067-5  
Linden AL, 2006, ENER POLICY, V34, P1918, DOI 10.1016/j.enpol.2005.01.015  
Liu P, 2010, ENER POLICY, V38, P4224, DOI 10.1016/j.enpol.2010.03.051  
Pan DM, 2012, APPL ENER, V97, P313, DOI 10.1016/j.apenergy.2011.12.009  
Pedrini A, 2002, BUILD ENVIRON, V37, P903, DOI 10.1016/S0360-1323(02)00051-3  
Persily A. K., 2008, 7145 NISTIR  
Rezaie B, 2012, APPL ENER, V93, P2, DOI 10.1016/j.apenergy.2011.04.020  
Santin OG, 2011, ENER BUILDINGS, V43, P2662, DOI 10.1016/j.enbuild.2011.06.024  
[Anonymous], HIGH PERF BUILD DAT  
[Anonymous], ENERGYPLUS VERS 7 2  
U.S. Department of Energy, 2011, 2010 BUILD EN DAT BO  
U.S. Energy Information Administration, COMM BUILD EN CONS S  
Wilcox S., 2008, USERS MANUAL TMY3 DA  
Yamaguchi Y, 2007, ENER BUILDINGS, V39, P1, DOI 10.1016/j.enbuild.2006.03.031  
Yang L, 2008, APPL ENER, V85, P800, DOI 10.1016/j.apenergy.2007.11.002  
Yildiz A, 2009, APPL ENER, V86, P1939, DOI 10.1016/j.apenergy.2008.12.010  
[Anonymous], 2004, 9012004 ANSIASHRAEIE  
[Anonymous], 2010, 9012010 ANSIASHRAEIE

NR 31  
TC 30  
Z9 30  
U1 1  
U2 23  
PU ELSEVIER SCI LTD  
PI OXFORD  
PA THE BOULEVARD, LANGFORD LANE, KIDLINGTON, OXFORD OX5 1GB, OXON, ENGLAND  
SN 0306-2619  
EI 1872-9118  
J9 APPL ENER  
JI Appl. Energy  
PD NOV  
PY 2013  
VL 111  
BP 515  
EP 528  
DI 10.1016/j.apenergy.2013.05.040  
PG 14  
WC Energy & Fuels; Engineering, Chemical  
SC Energy & Fuels; Engineering  
GA 236YH  
UT WOS:000325834900048  
DA 2018-05-03  
ER

PT J  
AU Gram-Hanssen, K  
AF Gram-Hanssen, Kirsten  
TI Efficient technologies or user behaviour, which is the more important  
when reducing households' energy consumption?  
SO ENERGY EFFICIENCY  
LA English

DT Article

DE Households; Energy consumption; User practices; Energy efficiency;

Appliance use; Meter data; Energy statistics

ID ELECTRICITY CONSUMPTION; OCCUPANCY; FEEDBACK; COMFORT; SAVINGS

AB Much policy effort focuses on energy efficiency of technology, though not only efficiency but also user behaviour is an important factor influencing the amount of consumed energy. This paper explores to what extent energy efficiency of appliances and houses or user behaviour is the more important, both for understanding why some households consume much more energy than others, and when looking for relevant approaches to a future low-carbon society. The paper uses several sources to explore this question, most of them from a Danish context, including results from the researcher's own projects and Danish national statistics. These Danish data are discussed together with international studies. Through the presentation of these different projects and examples, it is shown how user behaviour is at least as important as the efficiency of technology when explaining households' energy consumption in Denmark. In the conclusion, these results are discussed in a broader international perspective and it is concluded that more research in this field is necessary. In relation to energy policy, it is argued that it is not a question of technology efficiency or behaviour, as both have to be included in future policy if energy demand is actually to be reduced. Furthermore, it is also argued that not only individual behaviour is relevant, but also a broader perspective on collectively shared low-carbon practices has to be promoted.

C1 Aalborg Univ, Danish Bldg Res Inst, DK-2450 Copenhagen SV, Denmark.

RP Gram-Hanssen, K (reprint author), Aalborg Univ, Danish Bldg Res Inst, AC Meyers Vaenge 15, DK-2450 Copenhagen SV, Denmark.

EM kgh@sbi.dk

OI Gram-Hanssen, Kirsten/0000-0002-8543-2501

CR Abrahamse W, 2007, J ENVIRON PSYCHOL, V27, P265, DOI 10.1016/j.jenvp.2007.08.002

Aune M, 2007, ENERG POLICY, V35, P5457, DOI 10.1016/j.enpol.2007.05.007

Brandon G, 1999, J ENVIRON PSYCHOL, V19, P75, DOI 10.1006/jevp.1998.0105

Danish Energy Authorities, 2010, EN STAT 2010

Darby S, 2010, BUILD RES INF, V38, P442, DOI 10.1080/09613218.2010.492660

Eurostat, 2009, PAN EN EN STAT SUPP

Faruqui A, 2010, J REGUL ECON, V38, P193, DOI 10.1007/s11149-010-9127-y

Fischer C, 2008, ENERG EFFIC, V1, P79, DOI 10.1007/s12053-008-9009-7

Gill Z.M., 2010, ENERG BUILDINGS, V43, P117

Gram-Hanssen K, 2012, ENERG BUILDINGS, V53, P64, DOI 10.1016/j.enbuild.2012.06.023

Gram-Hanssen K, 2011, J CONSUM CULT, V11, P61, DOI 10.1177/1469540510391725

Gram-Hanssen K, 2010, BUILD RES INF, V38, P175, DOI 10.1080/09613210903541527

Gram-Hanssen K., 2004, ECOLOGICAL EC CONSUM

Gram-Hanssen K, 2004, P 2004 AM COUNC EN E

Gram-Hanssen K., 2003, BOLIGERS ENERGIFORBR

Greening LA, 2000, ENERG POLICY, V28, P389

HACKETT B, 1991, SOCIOL FORUM, V6, P449, DOI 10.1007/BF01114472

Hargreaves T, 2010, ENERG POLICY, V38, P6111, DOI 10.1016/j.enpol.2010.05.068

Hobson K, 2006, ETHICS POLICY ENV, V9, P317, DOI 10.1080/13668790600902375

Jensen J. O. K., 2009, 1 C P ECEEE SUMM STU

Karlsson JF, 2007, RENEW ENERG, V32, P1830, DOI 10.1016/j.renene.2006.10.009

Kristensen L., 2010, GRONNE HUS, V197

LUTZENHISER L, 1993, ANNU REV ENERG ENV, V18, P247, DOI 10.1146/annurev.energy.18.1.247

Morley J., 2011, ECEEE P 2011 SUMM ST

Narayan PK, 2007, ENERG POLICY, V35, P4485, DOI 10.1016/j.enpol.2007.03.018

PALMBORG C, 1986, ENERGY, V11, P643, DOI 10.1016/0360-5442(86)90144-1

Ropke I, 1999, ECOL ECON, V28, P399, DOI 10.1016/S0921-8009(98)00107-4

Ropke I, 2010, ENERG POLICY, V38, P1764, DOI 10.1016/j.enpol.2009.11.052

Sanne C, 2000, ENERG POLICY, V28, P487, DOI 10.1016/S0301-4215(00)00031-8

Guerra Santin O, 2010, BUILD RES INF, V38, P318

Santin OG, 2009, ENERG BUILDINGS, V41, P1223, DOI 10.1016/j.enbuild.2009.07.002

Shipper L., 2000, ENERG POLICY, V<IT>28</IT>, P367

Shipworth M, 2010, BUILD RES INF, V38, P50, DOI 10.1080/09613210903263007

Shove E, 2003, COMFORT CLEANLINESS

Shove E, 2010, RES POLICY, V39, P471, DOI 10.1016/j.respol.2010.01.019

Sonderegger, 1977, ENER G BUILDINGS, V1, P313  
 Sorrell S, 2009, ENER G POLICY, V37, P1356, DOI 10.1016/j.enpol.2008.11.026  
 Steemers K, 2009, BUILD RES INF, V37, P625, DOI 10.1080/09613210903186661  
 Strengers Y, 2010, ENER G POLICY, V38, P7312, DOI 10.1016/j.enpol.2010.08.006  
 Wallenborn G, 2011, INT J CONSUM STUD, V35, P146, DOI 10.1111/j.1470-6431.2010.00985.x  
 Wilhite H., 2010, C PRACT THEOR CLIM C  
 Yohanis YG, 2008, ENER G BUILDINGS, V40, P1053, DOI 10.1016/j.enbuild.2007.09.001

NR 42

TC 30

Z9 30

U1 0

U2 45

PU SPRINGER

PI DORDRECHT

PA VAN GODEWIJCKSTRAAT 30, 3311 GZ DORDRECHT, NETHERLANDS

SN 1570-646X

J9 ENER G EFFIC

J1 Energy Effic.

PD AUG

PY 2013

VL 6

IS 3

BP 447

EP 457

DI 10.1007/s12053-012-9184-4

PG 11

WC GREEN & SUSTAINABLE SCIENCE & TECHNOLOGY; Energy & Fuels; Environmental Studies

SC Science & Technology - Other Topics; Energy & Fuels; Environmental Sciences & Ecology

GA 178HL

UT WOS:000321437000002

DA 2018-05-03

ER

PT J

AU Gouveia, JP

Fortes, P

Seixas, J

AF Gouveia, Joao Pedro

Fortes, Patricia

Seixas, Julia

TI Projections of energy services demand for residential buildings:

Insights from a bottom-up methodology

SO ENERGY

LA English

DT Article

DE Energy services demand; Residential buildings; Portugal

ID CLIMATE-CHANGE; ELECTRICITY CONSUMPTION; CALIFORNIA; IMPACTS; TRENDS; COSTS; STOCK; MODEL

AB Projections of energy demand are important for energy security supply and low carbon futures, and usually rely on final energy consumption trends methods, limiting the opportunity for future options. Methods supported by energy services are much preferred to estimate future energy demand, since they are better suited to accomplish end-users needs. Final energy can then be assessed through complementary tools, as technological models, resulting in deeper knowledge on the relation between energy services and technology options.

This paper presents a bottom-up methodology to project detailed energy end-uses demand in the Portuguese residential buildings until 2050, aiming to identify the parameters governing energy services

demand uncertainty, through a sensitivity analysis. The partial equilibrium TIMES (The Integrated MARKAL-EFOM System) model was used to assess technology options and final energy needs for the range of parameters variations for each end-use, allowing to conclude on the impact of uncertainty of energy services demand in final energy.

Main results show that technology can overweight behavioral practices and lifestyle changes for some end-uses as in space heating and lighting. Nevertheless, important focus should be given to uncertain parameters related with consumer behavior, especially those on heating and other electric end-uses, as thermal comfort and equipment's use. (C) 2012 Elsevier Ltd. All rights reserved.

C1 [Gouveia, Joao Pedro; Fortes, Patricia; Seixas, Julia] Univ Nova Lisboa, Fac Ciencias & Tecnol, CENSE Ctr Environm & Sustainabil Res, P-2829516 Caparica, Portugal.

RP Gouveia, JP (reprint author), Univ Nova Lisboa, Fac Ciencias & Tecnol, CENSE Ctr Environm & Sustainabil Res, P-2829516 Caparica, Portugal.

EM jplg@fct.unl.pt; p.fs@fct.unl.pt; mjs@fct.unl.pt

RI Fortes, Patricia/K-6806-2014; Gouveia, Joao Pedro/I-4288-2014; Seixas, Julia/K-9400-2013

OI Fortes, Patricia/0000-0002-4743-1874; Gouveia, Joao Pedro/0000-0002-7360-1363; Seixas, Julia/0000-0003-0355-0465

FU Portuguese Science and Technology Foundation (FCT) [SFRH/BD/70177/2011]

FX The authors are grateful for the valuable comments and suggestions on the manuscript from the anonymous reviewers. This work has been supported by the Portuguese Science and Technology Foundation (FCT) through the scholarship SFRH/BD/70177/2011.

CR ADENE, 2006, DAT EQ EN EFF BAS DA

Aguiar R., 2002, BUILD SERV ENG RES T, V23, P223

Rosas-Flores JA, 2010, ENERGY, V35, P2596, DOI 10.1016/j.energy.2010.01.015

Amarawickrama HA, 2008, ENERGY, V33, P724, DOI 10.1016/j.energy.2007.12.008

ANDERSON KP, 1973, RESIDENTIAL ENERGY U

Anstrom S, 2010, ENERGY EFFICIENCY IM

Asimakopoulos DA, 2012, ENERGBUILDINGS, V49, P488, DOI 10.1016/j.enbuild.2012.02.043

Auffhammer M, 2011, CLIMATIC CHANGE, V109, P191, DOI 10.1007/s10584-011-0299-y

Boardman B., 2005, 40 HOUSE

Boucinha J, 2006, CHANGES ELECT DEMAND

Brounen D., 2012, RESIDENTIAL ENERGY U

Daioglou V, 2012, ENERGY, V37, P601, DOI 10.1016/j.energy.2011.10.044

DGEG, 2011, STAT EN BAL 2005 201

DGEG, 2011, SURV EN CONS HOUS

Dilaver Z, 2011, ENERGY, V36, P6686, DOI 10.1016/j.energy.2011.07.043

Eurostat, 2011, EN STAT RES CONS

Fouquet R., 2011, LONG RUN DEMAND LIGH

Gomez A, 2011, ENERGY, V36, P1973, DOI 10.1016/j.energy.2010.02.046

Haas R, 2008, ENERGPOLICY, V36, P4012, DOI 10.1016/j.enpol.2008.06.028

Howells MI, 2005, ENERGPOLICY, V33, P1833, DOI 10.1016/j.enpol.2004.02.019

IEA, 2011, WORLD EN OUTL

INE, 2011, CONSTR HOUS STAT

INE, 2008, IDEF HOUS BUDG SURV, P135

INE, 2011, CENS 2011

INE, 2001, CENS 2001 MAIN CHAR

INE, 2009, POP PROJ 2008 2060

Jaffal I, 2012, APPL THERM ENG, V40, P267, DOI 10.1016/j.applthermaleng.2012.02.005

Labenderia X., 2006, ENERGY J, V27, P87

Li DHW, 2012, ENERGY, V42, P103, DOI 10.1016/j.energy.2012.03.044

Lombard L., 2008, ENERGBUILDINGS, V40, P394

Loulou R, COMPUTATIONAL MANAGE, V5, P7

Loulou R., 2005, DOCUMENTATION TIME 2

Loulou R., 2005, DOCUMENTATION TIMES

Madlener R, 1996, J ENERGY LIT, VII, P3

MEI. PNAEE, 2008, PNAEE NAT ACT PLAN E, P55

Panao MJNO, 2011, ENERGY, V36, P3262, DOI 10.1016/j.energy.2011.03.018

Olonscheck M, 2011, ENER POLICY, V39, P4795, DOI 10.1016/j.enpol.2011.06.041  
 Pachauri S, 2003, ENERGY USE ENERGY AC  
 Pilli-Sihvola K, 2010, ENER POLICY, V38, P2409, DOI 10.1016/j.enpol.2009.12.033  
 Popescu D, 2009, ENERGY, V34, P1447, DOI 10.1016/j.energy.2009.05.035  
 Price L., 1998, MITIGATION ADAPTATIO, V3, P263  
 REISTER DB, 1981, ENERGY, V6, P305, DOI 10.1016/0360-5442(81)90074-8  
 REMODECE, 2008, RES MONT DECR EN US  
 Rosenberg E, 2012, FORECAST USEFUL ENER  
 Santos F. D., 2006, CLIMATE CHANGE PORTU  
 Sartori I, 2009, ENER POLICY, V37, P1614, DOI 10.1016/j.enpol.2008.12.031  
 SCHIPPER L, 1985, ANNU REV ENERGY, V10, P341, DOI 10.1146/annurev.eg.10.110185.002013  
 Schulz T.F., 2007, THESIS ETH ZURICH SW  
 Seixas J., 2010, NEW ENERGY TECHNOLOG  
 Seixas J., 2008, FINAL REPORT PORTUGA  
 Seixas J., 2012, LOW CARBON ROADMAP P  
 Simoes S, 2008, ENER POLICY, V36, P3598, DOI 10.1016/j.enpol.2008.06.004  
 Sovacool BK, 2011, ENER POLICY, V39, P1659, DOI 10.1016/j.enpol.2010.12.041  
 Strachan N., 2007, FINAL REPORT DTI DEF  
 Suganthi L, 2012, RENEW SUST ENER REV, V16, P1223, DOI 10.1016/j.rser.2011.08.014  
 Swan LG, 2009, RENEW SUST ENER REV, V13, P1819, DOI 10.1016/j.rser.2008.09.033  
 Unler A, 2008, ENER POLICY, V36, P1937, DOI 10.1016/j.enpol.2008.02.018  
 van Ruijven B, 2010, ENERGY, V35, P269, DOI 10.1016/j.energy.2009.09.019  
 Kanudia A, 2006, PROJECTIONS DEMAND E  
 WWF, 2011, EN REP 100 REN EN 20, P256  
 Xu P, 2012, ENERGY, V44, P792, DOI 10.1016/j.energy.2012.05.013  
 Yun GY, 2011, APPL ENER, V88, P2191, DOI 10.1016/j.apenergy.2011.01.010

NR 62

TC 30

Z9 30

U1 2

U2 32

PU PERGAMON-ELSEVIER SCIENCE LTD

PI OXFORD

PA THE BOULEVARD, LANGFORD LANE, KIDLINGTON, OXFORD OX5 1GB, ENGLAND

SN 0360-5442

EI 1873-6785

J9 ENERGY

JI Energy

PD NOV

PY 2012

VL 47

IS 1

BP 430

EP 442

DI 10.1016/j.energy.2012.09.042

PG 13

WC Thermodynamics; Energy &amp; Fuels

SC Thermodynamics; Energy &amp; Fuels

GA 074ZR

UT WOS:000313854100047

DA 2018-05-03

ER

PT J

AU Zhou, KL

Yang, SL

AF Zhou, Kaile

Yang, Shanlin

TI Understanding household energy consumption behavior: The contribution of energy big data analytics

SO RENEWABLE & SUSTAINABLE ENERGY REVIEWS

LA English

DT Review

DE Household energy consumption behavior; Energy big data; Big data analytics; Energy informatics; Intervention strategies

ID DEMAND-SIDE MANAGEMENT; PRO-ENVIRONMENTAL BEHAVIOR; ELECTRICITY CONSUMPTION; SOCIAL INFORMATICS; SAVING BEHAVIOR; CLIMATE-CHANGE; CONSERVATION BEHAVIOR; FEEDBACK INFORMATION; RESEARCH AGENDA; POWER INDUSTRY

AB Understanding and changing household energy consumption behavior are considered as effective ways to improve energy efficiency and promote energy conservation. With the increasing penetration of conventional and emerging information and communication technologies (ICTs) in energy sector, traditional energy systems are being digitized. The energy big data provides a new way to analyze and understand individuals' energy consumption behavior, and thus to improve energy efficiency and promote energy conservation. We first propose a framework of the interdisciplinary research of energy, social and information science, which includes energy social science, social informatics and energy informatics. Then, different dimensions and different research paradigms of household energy consumption behavior are presented. Household energy consumption behavior can be analyzed in time dimension, user dimension and spatial dimension. The economic paradigm (including demand response) and the behavior-oriented paradigm (including intervention strategies) are two major research streams of household energy consumption behavior. Finally, the "4V" characteristics (i.e., volume, velocity, variety and value) of energy big data are discussed. (C) 2015 Elsevier Ltd. All rights reserved.

C1 [Zhou, Kaile; Yang, Shanlin] Hefei Univ Technol, Sch Management, Hefei 230009, Peoples R China.

[Zhou, Kaile; Yang, Shanlin] Hefei Univ Technol, Minist Educ, Key Lab Proc Optimizat & Intelligent Decis Making, Hefei 230009, Peoples R China.

RP Zhou, KL (reprint author), Hefei Univ Technol, Sch Management, Hefei 230009, Peoples R China.; Zhou, KL (reprint author), Hefei Univ Technol, Minist Educ, Key Lab Proc Optimizat & Intelligent Decis Making, Hefei 230009, Peoples R China.

EM zhoukaile@hfut.edu.cn

FU National Natural Science Foundation of China [71501056]; Anhui Provincial Philosophy and Social Science Planning Project [AHSKQ2015D42]; Foundation for Innovative Research Groups of the National Natural Science Foundation of China [71521001]; Fundamental Research Funds for the Central Universities [JZ2015HGBZ0093]

FX The authors would like to thank the anonymous reviewers for their constructive comments and suggestions. This work is supported by the National Natural Science Foundation of China (No. 71501056), Anhui Provincial Philosophy and Social Science Planning Project (No. AHSKQ2015D42), the Foundation for Innovative Research Groups of the National Natural Science Foundation of China (No. 71521001), and the Fundamental Research Funds for the Central Universities (JZ2015HGBZ0093).

CR Aalami HA, 2010, ELECTR POW SYST RES, V80, P426, DOI 10.1016/j.epsr.2009.10.007  
 Abrahamse W, 2005, J ENVIRON PSYCHOL, V25, P273, DOI 10.1016/j.jenvp.2005.08.002  
 Abrahamse W, 2007, J ENVIRON PSYCHOL, V27, P265, DOI 10.1016/j.jenvp.2007.08.002  
 AJZEN I, 1991, ORGAN BEHAV HUM DEC, V50, P179, DOI 10.1016/0749-5978(91)90020-T  
 Aldossary NA, 2014, APPL ENERG, V114, P353, DOI 10.1016/j.apenergy.2013.09.061  
 Allcott H, 2010, SCIENCE, V327, P1204, DOI 10.1126/science.1180775  
 ALLEN CT, 1982, J CONSUM RES, V8, P381, DOI 10.1086/208878  
 Amin S. F., 2005, IEEE POWER ENERGY M, P34, DOI [10.1109/MPAE.2005.1507024, DOI 10.1109/MPAE.2005.1507024]  
 Bamberg S, 2007, J ENVIRON PSYCHOL, V27, P14, DOI 10.1016/j.jenvp.2006.12.002  
 Barr S, 2005, ENERG POLICY, V33, P1425, DOI 10.1016/j.enpol.2003.12.016  
 BECKER LJ, 1981, ENVIRON BEHAV, V13, P590, DOI 10.1177/0013916581135004  
 Bennett C., 2008, EN 2030 C ENERGY 200, P1, DOI DOI 10.1109/ENERGY.2008.4781067  
 BITTLE RG, 1979, J ENVIRON SYST, V9, P275, DOI 10.2190/91AA-P97G-JF92-T7EJ

- Botetzagias I, 2014, ENER POLICY, V69, P415, DOI 10.1016/j.enpol.2014.03.005
- Boudet H, 2014, ENER POLICY, V73, P439, DOI 10.1016/j.enpol.2014.05.044
- Branco G, 2004, ENER BUILDINGS, V36, P543, DOI 10.1016/j.enbuild.2004.01.028
- Cai S, 2013, INT J PROD ECON, V146, P491, DOI 10.1016/j.ijpe.2013.01.030
- Chowdhury G, 2012, J AM SOC INF SCI TEC, V63, P633, DOI 10.1002/asi.21703
- Corbett J, 2013, INFORM SYST FRONT, V15, P747, DOI 10.1007/s10796-013-9414-0
- Darby Sarah, 2006, REV DEFRA LIT METERI, V486, P2006
- de Almeida A, 2011, ENER BUILDINGS, V43, P1884, DOI 10.1016/j.enbuild.2011.03.027
- DEYOUNG R, 1993, ENVIRON BEHAV, V25, P485, DOI 10.1177/0013916593253003
- Dietz T, 2009, P NATL ACAD SCI USA, V106, P18452, DOI 10.1073/pnas.0908738106
- Dimitropoulos J, 2007, ENER POLICY, V35, P6354, DOI 10.1016/j.enpol.2007.07.028
- Dixon GN, 2015, ENERGY RES SOC SCI, V6, P121, DOI 10.1016/j.erss.2015.01.004
- Dunne T, 2012, THE LAVASTORM BLOG
- Dwyer PC, 2015, J ENVIRON PSYCHOL, V41, P30, DOI 10.1016/j.jenvp.2014.11.002
- DWYER WO, 1993, ENVIRON BEHAV, V25, P275, DOI 10.1177/0013916593255001
- EEA, 2008, 62008 EEA
- Ellegard K, 2011, APPL ENER, V88, P1920, DOI 10.1016/j.apenergy.2010.11.019
- Elster Jon, 1986, RATIONAL CHOICE
- European Commission, 2006, COM2006545 EUR COMM
- Fabi V, 2012, BUILD ENVIRON, V58, P188, DOI 10.1016/j.buildenv.2012.07.009
- Farhangi H, 2010, IEEE POWER ENERGY M, V8, P18, DOI 10.1109/MPE.2009.934876
- FERC, 2009, NAT ASS DEM RESP POT
- Fishbein M., 2009, PREDICTING CHANGING
- Frederiks ER, 2015, RENEW SUST ENER REV, V41, P1385, DOI 10.1016/j.rser.2014.09.026
- Gardner GT, 2008, ENVIRONMENT, V50, P12, DOI 10.3200/ENVT.50.5.12-25
- Gardner G.T., 1996, ENV PROBLEMS HUMAN B
- Geller ES, 1982, PRESERVING ENV NEW S
- GELLINGS CW, 1985, P IEEE, V73, P1468, DOI 10.1109/PROC.1985.13318
- Gifford R, 2011, WIRES CLIM CHANGE, V2, P801, DOI 10.1002/wcc.143
- Goebel C, 2014, BUS INFORM SYST ENG+, V6, P25, DOI 10.1007/s12599-013-0304-2
- Gronhoj A, 2011, INT J CONSUM STUD, V35, P138, DOI 10.1111/j.1470-6431.2010.00967.x
- Gungor VC, 2011, IEEE T IND INFORM, V7, P529, DOI 10.1109/TII.2011.2166794
- Gupta R, 2012, CLOUD COMPUTING BIG, P42
- Han Q, 2013, ENER POLICY, V52, P706, DOI 10.1016/j.enpol.2012.10.031
- Harding M, 2014, J ECON BEHAV ORGAN, V107, P209, DOI 10.1016/j.jebo.2014.04.012
- HAYES SC, 1981, J APPL BEHAV ANAL, V14, P81, DOI 10.1901/jaba.1981.14-81
- Hiller C, 2015, ENERGY BUILD, V87, P243
- Homans G. C., 1961, SOCIAL BEHAV ITS ELE
- Jackson T., 2005, MOTIVATING SUSTAINAB
- Jain RK, 2013, ENER BUILDINGS, V66, P119, DOI 10.1016/j.enbuild.2013.06.029
- Jain RK, 2013, ENER BUILDINGS, V64, P408, DOI 10.1016/j.enbuild.2013.05.011
- Kim JH, 2011, ENERGY, V36, P873, DOI 10.1016/j.energy.2010.12.027
- King G, 2011, SCIENCE, V331, P719, DOI 10.1126/science.1197872
- Kling R, 2007, INFORM SOC, V23, P205, DOI 10.1080/01972240701441556
- Kluger AN, 1996, PSYCHOL BULL, V119, P254, DOI 10.1037/0033-2909.119.2.254
- Kobus CBA, 2015, APPL ENER, V147, P335, DOI 10.1016/j.apenergy.2015.01.073
- Lazer D, 2009, SCIENCE, V323, P721, DOI 10.1126/science.1167742
- Linden AL, 2006, ENER POLICY, V34, P1918, DOI 10.1016/j.enpol.2005.01.015
- Locke EA, 2002, AM PSYCHOL, V57, P705, DOI 10.1037//0003-066X.57.9.705
- Locke EA, 2000, APPL PSYCHOL-INT REV, V49, P408, DOI 10.1111/1464-0597.00023
- Locke EA, 2006, CURR DIR PSYCHOL SCI, V15, P265, DOI 10.1111/j.1467-8721.2006.00449.x
- Looock CM, 2013, MIS QUART, V37, P1313, DOI 10.25300/MISQ/2013/37.4.15
- Looock C, 2012, P 33 INT C INF SYST, P1
- Looock C-M, 2011, P 20 INT C MAN TECHN
- Lund H, 2012, ENERGY, V42, P96, DOI 10.1016/j.energy.2012.04.003
- LUTZENHISER L, 1993, ANNU REV ENER ENV, V18, P247, DOI 10.1146/annurev.energy.18.1.247
- Madden S, 2012, IEEE INTERNET COMPUT, V16, P4, DOI 10.1109/MIC.2012.50
- Matsui K, 2014, APPL ENER, V120, P159, DOI 10.1016/j.apenergy.2014.01.049

- Mattern F., 2010, P 1 INT C EN EFF COM, P1
- McAfee A., 2012, HARVARD BUS REV, V60, P60
- McKenzieMohr D, 1995, J SOC ISSUES, V51, P139, DOI 10.1111/j.1540-4560.1995.tb01352.x
- Mi LY, 2011, ENRGY PROCED, V5, P229, DOI 10.1016/j.egypro.2011.03.041
- Mizobuchi K, 2013, ENERG POLICY, V63, P775, DOI 10.1016/j.enpol.2013.08.064
- Moghaddam MP, 2011, APPL ENERG, V88, P3257, DOI 10.1016/j.apenergy.2011.02.039
- Mohamed AMA, 2015, APPL ENERG, V146, P247, DOI 10.1016/j.apenergy.2015.02.008
- National Bureau of Statistics of China (NBSC), 2014, CHIN EN STAT YB
- Nilsson A, 2014, APPL ENERG, V122, P17, DOI 10.1016/j.apenergy.2014.01.060
- O'Sullivan KC, 2014, SUSTAIN CITIES SOC, V13, P182, DOI 10.1016/j.scs.2013.10.004
- Osterhuis TL, 1997, J MARKETING, V61, P16, DOI 10.2307/1252084
- Ouyang JL, 2009, ENERG BUILDINGS, V41, P711, DOI 10.1016/j.enbuild.2009.02.003
- Pedersen L. H., 2000, J ENVIRON POL PLAN, V2, P193
- Perugini M, 2004, CONTEMPORARY PERSPECTIVES ON THE PSYCHOLOGY OF ATTITUDES, P169
- Poortinga W, 2003, J ECON PSYCHOL, V24, P49, DOI 10.1016/S0167-4870(02)00154-X
- Prindle W, 2011, ENERGY, SUSTAINABILITY AND THE ENVIRONMENT: TECHNOLOGY, INCENTIVES, BEHAVIOR, P305
- Qureshi WA, 2011, ENERG CONVERS MANAGE, V52, P2110, DOI 10.1016/j.enconman.2010.12.008
- Revell K, 2014, ENERG POLICY, V73, P461, DOI 10.1016/j.enpol.2014.05.049
- SAMUELSON CD, 1991, J APPL SOC PSYCHOL, V21, P549, DOI 10.1111/j.1559-1816.1991.tb00536.x
- Sapci O, 2014, J BEHAV EXP ECON, V52, P29, DOI 10.1016/j.socec.2014.06.001
- Sawyer S, 2002, ANNU REV INFORM SCI, V36, P427, DOI 10.1002/aris.1440360111
- Sawyer S., 2005, B AM SOC INFORM SCI, V31, P9, DOI DOI 10.1002/BULT.2005.1720310504
- Schultz P.W., 2002, NEW TOOLS ENV PROTEC, P67
- Schwartz S. H., 1977, ADV EXPT SOCIAL PSYC, V10, P221, DOI [DOI 10.1016/S0065-2601(08)60358-5, 10.1016/S0065-2601(08)60358-5]
- Simon HA, 1955, Q J ECON, V69, P99, DOI 10.2307/1884852
- SOCOLOW RH, 1978, ENERG BUILDINGS, V1, P207, DOI 10.1016/0378-7788(78)90003-8
- Song ML, 2013, RENEW SUST ENERG REV, V20, P8, DOI 10.1016/j.rser.2012.11.075
- Sorrell S, 2015, RENEW SUST ENERG REV, V47, P74, DOI 10.1016/j.rser.2015.03.002
- Sovacool BK, 2014, ENERGY RES SOC SCI, V1, P1, DOI 10.1016/j.erss.2014.02.003
- Steg L, 2005, J ENVIRON PSYCHOL, V25, P415, DOI 10.1016/j.jenvp.2005.08.003
- Steg L, 2010, BRIT J SOC PSYCHOL, V49, P725, DOI 10.1348/014466609X477745
- Steg L, 2009, J ENVIRON PSYCHOL, V29, P309, DOI 10.1016/j.jenvp.2008.10.004
- Steg L, 2008, ENERG POLICY, V36, P4449, DOI 10.1016/j.enpol.2008.09.027
- Strbac G, 2008, ENERG POLICY, V36, P4419, DOI 10.1016/j.enpol.2008.09.030
- EIA, 2009, ANN EN REV 2009
- Valkila N, 2013, ENERGY SUSTAIN DEV, V17, P24, DOI 10.1016/j.esd.2012.10.001
- van der Werff E, 2015, ENERGY RES SOC SCI, V6, P8, DOI 10.1016/j.erss.2014.11.002
- Vassileva I, 2013, APPL ENERG, V106, P314, DOI 10.1016/j.apenergy.2013.01.059
- Vassileva I, 2012, APPL ENERG, V93, P575, DOI 10.1016/j.apenergy.2011.12.067
- Vassileva I, 2012, APPL ENERG, V90, P182, DOI 10.1016/j.apenergy.2011.05.031
- Vining J, 2003, NEW HDB ENV PSYCHOL, P541
- Wang FY, 2007, IEEE INTELL SYST, V22, P79, DOI 10.1109/MIS.2007.41
- Wang ZH, 2011, ENERG POLICY, V39, P3550, DOI 10.1016/j.enpol.2011.03.055
- Watson RT, 2012, COMMUN ACM, V55, P28, DOI 10.1145/2209249.2209261
- Watson R T, 2010, MANAGEMENT INFORM SY, V34, P4
- Watts Duncan J., 2013, BRIDGE FRONTIERS ENG, V43, P5
- Webb D, 2013, J ENVIRON PSYCHOL, V35, P59, DOI 10.1016/j.jenvp.2013.04.003
- Wicker P, 2013, ECOL ECON, V88, P41, DOI 10.1016/j.ecolecon.2013.01.005
- Wilson B, 2013, LANDSCAPE URBAN PLAN, V115, P62, DOI 10.1016/j.landurbplan.2013.03.011
- Yang S, 2015, ENERG BUILDINGS, V96, P140, DOI 10.1016/j.enbuild.2015.03.009
- Yohanis YG, 2008, ENERG BUILDINGS, V40, P1053, DOI 10.1016/j.enbuild.2007.09.001
- Zhang Boming, 2009, Automation of Electric Power Systems, V33, P21
- Zhong HW, 2013, IEEE T POWER SYST, V28, P1266, DOI 10.1109/TPWRS.2012.2218665
- Zhou KL, 2015, RENEW SUST ENERG REV, V50, P719, DOI 10.1016/j.rser.2015.05.041
- Zhou K, 2015, RENEW SUST ENERG REV, V47, P954, DOI 10.1016/j.rser.2015.03.036
- Zhou KL, 2015, RENEW SUST ENERG REV, V45, P10, DOI 10.1016/j.rser.2015.01.056



Zhou KL, 2014, RENEW SUST ENERG REV, V35, P304, DOI 10.1016/j.rser.2014.04.028

ZHOU Y, 2013, OXID MED CELL LONGEV, V2013, P2013, DOI DOI 10.1371/JOURNAL.PONE.0057558

NR 129

TC 29

Z9 30

U1 11

U2 139

PU PERGAMON-ELSEVIER SCIENCE LTD

PI OXFORD

PA THE BOULEVARD, LANGFORD LANE, KIDLINGTON, OXFORD OX5 1GB, ENGLAND

SN 1364-0321

J9 RENEW SUST ENERG REV

J1 Renew. Sust. Energ. Rev.

PD APR

PY 2016

VL 56

BP 810

EP 819

DI 10.1016/j.rser.2015.12.001

PG 10

WC GREEN & SUSTAINABLE SCIENCE & TECHNOLOGY; Energy & Fuels

SC Science & Technology - Other Topics; Energy & Fuels

GA DC8IC

UT WOS:000369462100062

DA 2018-05-03

ER

PT J

AU Noailly, J

AF Noailly, Joelle

TI Improving the energy efficiency of buildings: The impact of  
environmental policy on technological innovation

SO ENERGY ECONOMICS

LA English

DT Article

DE Innovation; Technological change; Patents; Energy-efficiency; Buildings;  
Environmental policy

ID PATENT STATISTICS; DIFFUSION; CONSERVATION; INDICATORS; PRICES; MODELS

AB This paper investigates the impact of alternative environmental policy instruments on technological innovations aiming to improve energy efficiency in buildings. The empirical analysis focuses on three main types of policy instruments, namely regulatory energy standards in buildings codes, energy taxes as captured by energy prices and specific governmental energy R&D expenditures. Technological innovation is measured using patent counts for specific technologies related to energy efficiency in buildings (e.g. insulation, high-efficiency boilers, energy-saving lightings). The estimates for seven European countries over the 1989-2004 period imply that a strengthening of 10% of the minimum insulation standards for walls would increase the likelihood to file additional patents by about 3%. In contrast, energy prices have no significant effect on the likelihood to patent. Governmental energy R&D support has a small positive significant effect on patenting activities. (C) 2011 Elsevier B.V. All rights reserved.

C1 CPB Netherlands Bur Econ Policy Anal, NL-2508 GM The Hague, Netherlands.

RP Noailly, J (reprint author), CPB Netherlands Bur Econ Policy Anal, POB 80510, NL-2508 GM The Hague, Netherlands.

EM J.Noailly@cpb.nl

CR ACS ZJ, 1989, KYKLOS, V42, P171

Allison PD, 2002, SOCIOL METHODOL, V32, P247, DOI 10.1111/1467-9531.00117

Beerepoot M., 2002, ENERGY REGULATIONS N

COMANOR WS, 1969, J POLIT ECON, V77, P392, DOI 10.1086/259522

Davis K., 2010, 12130 NBER

Dekker T., 2009, INT ENV AGREEM UNPUB

De Vries F., 2005, 18 CENTER  
 Eichhammer W., 1999, COMP THERMAL BUILDIN  
 European Commission, 2009, R D INV PRIOR TECHN  
 FISHER AC, 1989, ENERG POLICY, V17, P397, DOI 10.1016/0301-4215(89)90010-4  
 Gillingham Kenneth, 2010, SPLIT INCENTIVES RES  
 Gillingham K., 2009, 15031 NBER  
 GRILICHES Z, 1990, J ECON LIT, V28, P1661  
 Hagedoorn J, 2003, RES POLICY, V32, P1365, DOI 10.1016/S0048-7333(02)00137-3  
 HAUSMAN J, 1984, ECONOMETRICA, V52, P909, DOI 10.2307/1911191  
 International Energy Agency, 2008, EN EFF REQ BUILD COD  
 Jaffe A.B., 1995, J ENVIRON ECON MANAG, V29, P43  
 JAFFE AB, 1994, RESOUR ENERGY ECON, V16, P91, DOI 10.1016/0928-7655(94)90001-9  
 Jaffe AB, 1997, REV ECON STAT, V79, P610, DOI 10.1162/003465397557196  
 Johnstone N., 2009, EAERE 2009 C 24 27 J  
 Johnstone N, 2010, ENVIRON RESOUR ECON, V45, P133, DOI 10.1007/s10640-009-9309-1  
 Lanjouw JO, 1996, RES POLICY, V25, P549, DOI 10.1016/0048-7333(95)00853-5  
 Levine M., 2007, CLIMATE CHANGE 2007  
 Levinson A, 2004, RESOUR ENERGY ECON, V26, P51, DOI [10.1016/S0928-7655(03)00047-2,  
 10.1016/50928-7655(03)00047-2]  
 Linn J, 2008, ECON J, V118, P1986, DOI 10.1111/j.1468-0297.2008.02199.x  
 Martin Y., 1998, MAITRISE ENERGIE  
 Newell RG, 1999, Q J ECON, V114, P941, DOI 10.1162/003355399556188  
 OECD, 2009, PAT STAT MAN  
 Popp D, 2006, J ENVIRON ECON MANAG, V51, P46, DOI 10.1016/j.jeem.2005.04.006  
 Popp D, 2002, AM ECON REV, V92, P160, DOI 10.1257/000282802760015658  
 Popp D, 2009, 14832 NBER  
 UNEP, 2007, BUILD CLIM CHANG STA  
 Wooldridge J. M., 2002, ECONOMETRIC ANAL CRO  
 NR 33  
 TC 29  
 Z9 30  
 U1 0  
 U2 38  
 PU ELSEVIER SCIENCE BV  
 PI AMSTERDAM  
 PA PO BOX 211, 1000 AE AMSTERDAM, NETHERLANDS  
 SN 0140-9883  
 J9 ENERG ECON  
 JI Energy Econ.  
 PD MAY  
 PY 2012  
 VL 34  
 IS 3  
 BP 795  
 EP 806  
 DI 10.1016/j.eneco.2011.07.015  
 PG 12  
 WC Economics  
 SC Business & Economics  
 GA 948OW  
 UT WOS:000304513500017  
 DA 2018-05-03  
 ER  
  
 PT J  
 AU Yohanis, YG  
 AF Yohanis, Yigzaw Goshu  
 TI Domestic energy use and householders' energy behaviour

## SO ENERGY POLICY

LA English

DT Article

DE Household energy efficiency; Appliances; Interventions

ID ELECTRICITY CONSUMPTION; EMBODIED ENERGY; EFFICIENCY GAP; SAVINGS; UK; CONSERVATION; APPLIANCES; DESIGN; HOMES; BUILDINGS

AB This paper discusses domestic energy use and energy behaviour. It shows some improvement in domestic energy consumption and adoption of good energy practice. The survey conducted indicated that 35% of homes could improve their energy efficiency by improved tank insulation. In the last 5 years condensing boilers have been installed only in 3% of homes, indicating that householders are unaware of their advantages. Although 88% of surveyed homes had purchased a major appliance in the last 2 years, only 16% had any idea of the energy rating of their new appliances. Use of energy saving light bulbs is predominant in kitchens compared to other rooms. 70-80% of householders undertook some kind of day-to-day energy efficiency measures. 20-35% of householders would like to invest in energy-saving measures but found cost to be a key barrier. Approximately 84% of those surveyed were unaware of the energy rating of their household appliances. Price and brand were the most important factors determining the purchase of a new appliance. Significant energy-saving could be achieved by providing appropriate information to the general public regarding temperature control, efficiency of appliances and energy-saving heating systems. (C) 2011 Elsevier Ltd. All rights reserved.

C1 Univ Ulster, Sch Built Environm, Ctr Sustainable Technol, Newtownabbey BT37 0QB, Ireland.

RP Yohanis, YG (reprint author), Univ Ulster, Sch Built Environm, Ctr Sustainable Technol, Newtownabbey BT37 0QB, Ireland.

EM yg.yohanis@ulster.ac.uk

FU Northern Ireland Housing Executive; Northern Ireland Electricity

FX Part of this work was supported by the Northern Ireland Housing Executive and Northern Ireland Electricity.

CR Abrahamse W, 2005, J ENVIRON PSYCHOL, V25, P273, DOI 10.1016/j.jenvp.2005.08.002

Abrahamse W, 2007, J ENVIRON PSYCHOL, V27, P265, DOI 10.1016/j.jenvp.2007.08.002

Abrahamse W, 2009, J ECON PSYCHOL, V30, P711, DOI 10.1016/j.joep.2009.05.006

Action Renewables, 2011, ACT REN

Andrade JA, 2001, ENERGBUILDINGS, V33, P525, DOI 10.1016/S0378-7788(00)00076-1

Attari SZ, 2010, P NATL ACAD SCI USA, V107, P16054, DOI 10.1073/pnas.1001509107

Baxter W., 1986, ENERGECON, V8, P62

Brandon G, 1999, J ENVIRON PSYCHOL, V19, P75, DOI 10.1006/jevp.1998.0105

BRANZ, 2005, HOUS EN END US PROJ

BRE, 2009, STAND ASS PROC EN RA

Carrico A. R., 2011, J ENERGY ENV LAW, V2, P61

COHEN S, 1991, ENERGBUILDINGS, V17, P297, DOI 10.1016/0378-7788(91)90012-R

Cordes JJ, 1990, J BEHAV EC, V19, P273

CTNI, 2005, VIS STUD NO IR

DEERING S, 1993, APPL ENERGBUILDINGS, V44, P1, DOI 10.1016/0306-2619(93)90044-P

DEFRA, 2003, EC INSTR IMPR HOUS E

Dietz T, 2010, P NATL ACAD SCI USA, V107, P16007, DOI 10.1073/pnas.1010651107

Druckman A, 2008, ENERGPOLICY, V36, P3177, DOI 10.1016/j.enpol.2008.03.021

DTI, 2002, EN CONS UK

DTI, 2003, EN CONS UK

DTI, 2008, DIG UK EN STAT

Firth S, 2008, ENERGBUILDINGS, V40, P926, DOI 10.1016/j.enbuild.2007.07.005

GILLINGHAM K, 2009, ANN REV RESOUR UNPUB

GOLDMAN CA, 1985, ENERGBUILDINGS, V8, P137, DOI 10.1016/0378-7788(85)90022-2

HECR, 2003, 7 ANN PROGR REP HOM

HITCHCOCK G, 1993, ENERGBUILDINGS, V20, P151, DOI 10.1016/0378-7788(93)90006-G

Jaber JO, 2002, ENERGBUILDINGS, V34, P311, DOI 10.1016/S0378-7788(01)00118-9

JAFJE AB, 1994, ENERGPOLICY, V22, P804, DOI 10.1016/0301-4215(94)90138-4

Kerkhof AC, 2009, ENERGPOLICY, V37, P1509, DOI 10.1016/j.enpol.2008.12.013

Labcraft, 2011, LABC DES LIGHT

Lam JC, 1998, ENERGBUILDINGS, V39, P623, DOI 10.1016/S0196-8904(97)10008-5

Leach N.L., 2000, P ACEEE SUMM STUD EN, V8, P197

Lee AHW, 2000, ENER CONVERS MANAGE, V41, P1999, DOI 10.1016/S0196-8904(00)00037-6  
LUTZENHISER L, 1993, ANNU REV ENER ENV, V18, P247, DOI 10.1146/annurev.energy.18.1.247  
Mansouri I, 1996, APPL ENER, V54, P211, DOI 10.1016/0306-2619(96)00001-3  
MEIER A, 1992, ENERGY, V17, P509, DOI 10.1016/0360-5442(92)90087-G  
Millward B., 2002, QUANTITATIVE ENERGY  
Mullaly C, 1998, ENER POLICY, V26, P1041, DOI 10.1016/S0301-4215(98)00046-9  
National Research Council (USA), 1985, EN EFF BUILD BEH ISS, P5  
NIE, 2011, SAV EN HOM  
NIHE, 2001, NO IR HOUS COND SURV  
Nilssen PA, 2003, APPL ENER, V76, P189  
OWENS J, 1988, ENERGY, V13, P853, DOI 10.1016/0360-5442(88)90050-3  
PALMBORG C, 1986, ENERGY, V11, P643, DOI 10.1016/0360-5442(86)90144-1  
Poortinga W, 2003, J ECON PSYCHOL, V24, P49, DOI 10.1016/S0167-4870(02)00154-X  
Roberts S, 2008, ENER POLICY, V36, P4630, DOI 10.1016/j.enpol.2008.09.064  
SCHIPPER L, 1982, ENERGY, V7, P205, DOI 10.1016/0360-5442(82)90045-7  
Seligman C, 1977, ENER BUILDINGS, V1, P325  
Shanks K.B.P., 2006, J HOUS BUILT ENVIRON, V21, P191  
Steg L, 2005, J ENVIRON PSYCHOL, V25, P415, DOI 10.1016/j.jenvp.2005.08.003  
Steg L, 2008, ENER POLICY, V36, P4449, DOI 10.1016/j.enpol.2008.09.027  
Stern PC, 2010, ENVIRON SCI TECHNOL, V44, P4847, DOI 10.1021/es100896p  
Stratford-on-Avon District Council, 2011, DOM SEC LIGHT  
Summerfield AJ, 2007, ENER BUILDINGS, V39, P783, DOI 10.1016/j.enbuild.2007.02.012  
Wall R, 2009, ENER POLICY, V37, P1021, DOI 10.1016/j.enpol.2008.10.045  
Westergren KE, 1999, ENER BUILDINGS, V29, P247, DOI 10.1016/S0378-7788(98)00065-6  
WILHITE HL, 1987, ENER BUILDINGS, V10, P73, DOI 10.1016/0378-7788(87)90007-7  
Wood G, 2003, ENER BUILDINGS, V35, P821, DOI 10.1016/S0378-7788(02)00241-4  
Yohanis YG, 2006, P I MECH ENG A-J POW, V220, P271, DOI 10.1243/095765006X76009  
Yohanis YG, 2002, ENERGY, V27, P77, DOI 10.1016/S0360-5442(01)00061-5  
Yohanis Y.G., 2005, HOUSEHOLD ENERGY RES  
Yohanis YG, 2008, ENER BUILDINGS, V40, P1053, DOI 10.1016/j.enbuild.2007.09.001  
Yohanis YG, 2010, APPL ENER, V87, P681, DOI 10.1016/j.apenergy.2009.08.003

NR 63

TC 29

Z9 29

U1 1

U2 41

PU ELSEVIER SCI LTD

PI OXFORD

PA THE BOULEVARD, LANGFORD LANE, KIDLINGTON, OXFORD OX5 1GB, OXON, ENGLAND

SN 0301-4215

J9 ENER POLICY

J1 Energy Policy

PD FEB

PY 2012

VL 41

BP 654

EP 665

DI 10.1016/j.enpol.2011.11.028

PG 12

WC Economics; Energy & Fuels; Environmental Sciences; Environmental Studies

SC Business & Economics; Energy & Fuels; Environmental Sciences & Ecology

GA 903XH

UT WOS:000301155500063

DA 2018-05-03

ER

PT J

AU Kuckshinrichs, W

- Kronenberg, T  
Hansen, P  
AF Kuckshinrichs, Wilhelm  
Kronenberg, Tobias  
Hansen, Patrick  
TI The social return on investment in the energy efficiency of buildings in Germany  
SO ENERGY POLICY  
LA English  
DT Article  
DE CO(2) emissions; Energy efficiency; Technology diffusion  
ID EXISTING BUILDINGS; INSULATION  
AB The German government has developed a variety of policy instruments intended to reduce national CO(2) emissions. These instruments include a programme administered by KfW bank, which aims at improving the energy efficiency of buildings. It provides attractive credit conditions or subsidies to finance refurbishment measures which improve the energy efficiency of buildings significantly.  
The refurbishment programme leads to a reduction in energy use, which benefits private investors by reducing their energy bills. In order to estimate whether the programme benefits society as a whole, additional effects must be taken into account, such as the amount of employment generated and the impact on the public budget.  
The aim of this paper is to evaluate the social benefits of the German CO(2) refurbishment programme for the years 2005-2007. An extended input-output model is used to estimate the effect of the refurbishment works on public revenue via taxes and social security contributions. The value of avoided CO(2) emissions is approximated using a range of marginal damage estimates from the literature. From these social benefits, the programme cost is deducted. The net social benefit thus computed turns out to be positive. This finding suggests that the refurbishment programme is a reasonable investment of public funds. (c) 2010 Elsevier Ltd. All rights reserved.
- C1 [Kuckshinrichs, Wilhelm; Kronenberg, Tobias; Hansen, Patrick] Forschungszentrum Julich, D-52425 Julich, Germany.  
RP Kronenberg, T (reprint author), Forschungszentrum Julich, D-52425 Julich, Germany.  
EM t.kronenberg@fz-juelich.de  
OI Kuckshinrichs, Wilhelm/0000-0002-5181-1298; Kronenberg, Tobias/0000-0001-9796-986X  
CR BACH HU, 2008, 142008 IAB  
BOHNISCH H, 1999, ZUKUNFT WARMEVERSORG  
Bolatturk A, 2006, APPL THERM ENG, V26, P1301, DOI 10.1016/j.applthermaleng.2005.10.019  
BRAAKMANN A, 2006, VIERTELJAHRliche EIN  
Clausnitzer K.-D., 2007, EFFEKTE KfW CO2 GEBÄ  
Clausnitzer K. D., 2008, EFFEKTE CO2 GEBÄUDE  
Erdmenger C, 2009, ENERG POLICY, V37, P158, DOI 10.1016/j.enpol.2008.07.031  
Fehr Ernst, 2005, 200520 U MUN DEP EC  
GABRIEL J, 2007, EFFEKTE KfW CO2 GEBÄ  
\*GERM GOV, 2007, ECKP INT EN KLIM PRO  
\*IWU, 2008, WIRTSCH EN MASSN SEL  
Johansson-Stenman O, 2005, ECON LETT, V86, P101, DOI 10.1016/j.econlet.2004.07.002  
KEMFERT C, 2007, DIW WOCHENBERICHT, V11, P165  
KLEEMANN M, 2003, KfW MITTELSTANDSUND, V30, P20  
KLEEMANN M, 2000, ENERGIEWIRTSCHAFT, V50, P444  
KLEEMANN M, 1999, CO2 REDUKTION BESCHA  
Kriechel B., 2009, EC INNOVATION NEW TE, V18, P267  
Kronenberg T, 2008, J ECON SURV, V22, P774, DOI 10.1111/j.1467-6419.2008.00549.x  
Power A, 2008, ENERG POLICY, V36, P4487, DOI 10.1016/j.enpol.2008.09.022  
Ravetz J, 2008, ENERG POLICY, V36, P4462, DOI 10.1016/j.enpol.2008.09.026  
Roberts S, 2008, ENERG POLICY, V36, P4482, DOI 10.1016/j.enpol.2008.09.023  
Siller T, 2007, ENERG POLICY, V35, P529, DOI 10.1016/j.enpol.2005.12.021  
Taylor PB, 2000, BUILD ENVIRON, V35, P339, DOI 10.1016/S0360-1323(99)00025-6  
Tzscheutschler P, 2009, BWK-ENERGIE-FACHMAG, V61, P6  
UBA, 2007, OK BEW UMW METH SCHA

\*UMW, 2007, WIRK MES BESCHS 23 A

NR 26

TC 29

Z9 30

U1 3

U2 25

PU ELSEVIER SCI LTD

PI OXFORD

PA THE BOULEVARD, LANGFORD LANE, KIDLINGTON, OXFORD OX5 1GB, OXON, ENGLAND

SN 0301-4215

J9 ENER POLICY

JI Energy Policy

PD AUG

PY 2010

VL 38

IS 8

BP 4317

EP 4329

DI 10.1016/j.enpol.2010.03.060

PG 13

WC Economics; Energy & Fuels; Environmental Sciences; Environmental Studies

SC Business & Economics; Energy & Fuels; Environmental Sciences & Ecology

GA 615EY

UT WOS:000279117500047

DA 2018-05-03

ER

PT J

AU Ashina, S

Nakata, T

AF Ashina, Shuichi

Nakata, Toshihiko

TI Energy-efficiency strategy for CO<sub>2</sub> emissions in a residential sector in

Japan

SO APPLIED ENERGY

LA English

DT Article

DE energy efficiency; rural energy-policy; residential sector

ID COGENERATION PLANTS; MANAGEMENT; SYSTEMS; DEMAND; DESIGN; CONSERVATION;  
TECHNOLOGIES; CONVERSION; MODEL; HEAT

AB This study examines the economics of energy-efficiency strategies, for reducing CO<sub>2</sub> emissions in a residential sector in Japan, from the perspective of regional characteristics. For this study, the residential sector in the Iwate prefecture was selected as representative of rural areas in Japan. In order to promote the purchases of energy-efficient consumer appliances, the prefectural government is presumed to reimburse purchasers a part of the cost difference between energy-efficient and conventional appliances. This paper begins with a discussion of the prefecture's financial support for purchasers of energy-efficient appliances and assumes that the payments come from prefectural government funds. This paper then looks at the effect of a carbon-tax refund on the reduction of CO<sub>2</sub> emissions. The results show that, if half of the households use energy-efficient appliances, then CO<sub>2</sub> emissions in the residential sector in the year 2020 will decrease from the BAU scenario of 0.726 Mt-C to 0.674 Mt-C. However, the Iwate prefectural government expends \$105 million annually, which is 1.5% of the total tax revenue for the year 2003. The carbon-tax refund effectively encourages further reductions in CO<sub>2</sub> emissions. Under the \$20/tC carbon-tax, proposed by the Ministry of the Environment, the carbon-tax refund leads to a reduction in residential CO<sub>2</sub> emissions from 0.726 Mt-C to 0.712 Mt-C. (c) 2007 Published by Elsevier Ltd.

C1 [Nakata, Toshihiko] Tohoku Univ, Grad Sch Engrn, Management Sci & Technol Dept, Sendai, Miyagi 9808579, Japan.

[Ashina, Shuichi] Ctr Global Environm Res, Natl Inst Environm Studies, Climate Policy Assessment Res Sec, Tsukuba, Ibaraki 3058506, Japan.

RP Nakata, T (reprint author), Tohoku Univ, Grad Sch Engn, Management Sci & Technol Dept, Aoba-yama 6-6-11-815, Sendai, Miyagi 9808579, Japan.

EM nakata@cc.mech.tohoku.ac.jp

RI Nakata, Toshihiko/E-3161-2010

OI Nakata, Toshihiko/0000-0003-0088-9498

CR Ahadi-Oskui T, 2006, ENERGY, V31, P1346, DOI 10.1016/j.energy.2005.05.016

Barr S, 2005, ENER POLICY, V33, P1425, DOI 10.1016/j.enpol.2003.12.016

Berta GL, 2006, ENERGY, V31, P1403, DOI 10.1016/j.energy.2005.05.022

BOYD DW, 1982, MANAGE SCI, V28, P418, DOI 10.1287/mnsc.28.4.418

Bruckner T, 2005, ECOL ECON, V54, P328, DOI 10.1016/j.ecolecon.2004.12.032

Dulleck U, 2004, ENER POLICY, V32, P1025, DOI 10.1016/S0301-4215(03)00060-0

\*EN CONS CTR, 2005, HDB EN EC STAT JPN

\*EN CONS CTR, 2005, TOP RUNN PROGR

Ghosh S, 2006, ENERGY, V31, P345, DOI 10.1016/j.energy.2005.01.011

\*GLOB WARM PREV HE, 2002, GUID MEAS PREV GLOB

Hernandez-Santoyo J, 2003, APPL ENER, V76, P219, DOI 10.1016/S0306-2619(03)00061-8

Hunt LC, 2003, ENERGY J, V24, P63

\*IW PREF GOVT, 2005, STAT REP IW PERF

\*IW PREF GOVT, 2002, REP BAS SURV PLANN N

\*IW PREF GOVT, 2002, ACT PLAN RES PREV GL

\*IW PREF GOVT, 2004, STAT REP IW PREF

\*JAP MIN ENV, 2005, IMPL CARB TAX JAP

\*JAP STAT BUR, 2005, JAP STAT YRB

\*JYUK RES I, 1999, EN HDB RES SECT

Kawamoto K, 2004, ENER BUILDINGS, V36, P915, DOI 10.1016/j.enbuild.2004.02.004

KUDO H, 2004, COMMUNICATION

Lamont A.D., 1997, USERS GUIDE META NET

Marbe A, 2006, ENERGY, V31, P1614, DOI 10.1016/j.energy.2005.05.029

Marquez AC, 2005, RELIAB ENG SYST SAFE, V88, P273, DOI 10.1016/j.ress.2004.07.018

\*MIN EC TRAD IND, 2003, ABSRT EL POW SUPPL D

\*MIN ENV, 2001, ACT TECHN RED CO2 EM

\*MIN ENV, 2004, PLAN CARB TAX

\*MIN ENV, 2004, SURV ENV TAX SYST OT

Mulder P, 2003, RESOUR ENERGY ECON, V25, P105, DOI 10.1016/S0928-7655(02)00019-2

Nagata Y, 2005, ENERGY, V30, P2636, DOI 10.1016/j.energy.2004.07.009

NAGATA Y, 2000, COMMUNICATION

NAKATA T, 2002, J CLEANER PROD

NAKATA T, 2004, PROG ENER COMBUST, P417

Pan CS, 2005, ENER BUILDINGS, V37, P443, DOI 10.1016/j.enbuild.2004.08.006

Rankin R, 2004, ENER CONVERS MANAGE, V45, P1553, DOI 10.1016/j.enconman.2003.08.020

SAINI S, 2004, REFOCUS MAY, P52

Smulders S, 2003, RESOUR ENERGY ECON, V25, P59, DOI 10.1016/S0928-7655(02)00017-9

UCHIYAMA Y, 1990, ENERGY ANAL POWER GE

Wall G, 2002, ENER CONVERS MANAGE, V43, P1235, DOI 10.1016/S0196-8904(02)00010-9

NR 39

TC 29

Z9 29

U1 0

U2 11

PU ELSEVIER SCI LTD

PI OXFORD

PA THE BOULEVARD, LANGFORD LANE, KIDLINGTON, OXFORD OX5 1GB, OXON, ENGLAND

SN 0306-2619

J9 APPL ENER

J1 Appl. Energy

PD FEB-MAR

PY 2008

VL 85

IS 2-3  
BP 101  
EP 114  
DI 10.1016/j.apenergy.2007.06.011  
PG 14  
WC Energy & Fuels; Engineering, Chemical  
SC Energy & Fuels; Engineering  
GA 243CV  
UT WOS:000251773400004  
DA 2018-05-03  
ER

PT J  
AU Gulbinas, R  
Taylor, JE  
AF Gulbinas, Rimas  
Taylor, John E.

TI Effects of real-time eco-feedback and organizational network dynamics on energy efficient behavior in commercial buildings

SO ENERGY AND BUILDINGS

LA English

DT Article

DE Behavior; Commercial buildings; Eco-feedback; Energy management; Organizational networks; Social networks

ID ELECTRICITY CONSUMPTION; SOCIAL-INFLUENCE; CONSERVATION; INFORMATION; IMPACT; SAVINGS; ANTECEDENTS; SYSTEM; NORMS; USERS

AB Commercial buildings account for a significant portion of energy consumption and associated carbon emissions around the world. Consequently, many countries are instituting building energy efficiency policies to mitigate the negative environmental impacts of building operations. As building owners and operators act to address the challenge of increasing energy efficiency, occupant behavior modification programs are growing increasingly popular. Recent advances in energy monitoring and control technologies have enabled the development of eco-feedback systems that collect, process, and relay high resolution, real-time energy consumption information to help building occupants control their energy-use. These systems have extended research into the effects of high resolution eco-feedback on building occupant behavior and energy efficiency from residential to commercial building settings. However, little is understood about how organizational network dynamics impact user-engagement levels with such systems and how these network connections may impact the energy conservation behavior of individuals inside commercial buildings. In this paper, results are presented from a novel 9-week eco-feedback system study which demonstrates that organizational network dynamics can significantly impact energy conservation among commercial building occupants. Furthermore, it is shown that exposure to eco-feedback impacts building occupant energy conservation differently in commercial office buildings than it does in residential buildings. (C) 2014 Elsevier B.V. All rights reserved.

C1 [Gulbinas, Rimas; Taylor, John E.] Virginia Tech, Charles E Via Jr Dept Civil & Environm Engr, Blacksburg, VA 24061 USA.

RP Taylor, JE (reprint author), Virginia Tech, Charles E Via Jr Dept Civil & Environm Engr, Blacksburg, VA 24061 USA.

EM rimasg@vt.edu; jet@vt.edu

FU Department of Energy Building Technologies Program; National Science Foundation [1142379]

FX This material is based upon work supported by the Department of Energy Building Technologies Program and the National Science Foundation under Grant No. 1142379. Any opinions, findings, and conclusions or recommendations expressed in this material are those of the authors and do not necessarily reflect the views of the Department of Energy or the National Science Foundation. The authors would like to thank the Alliance for Sustainable Colorado for hosting the study and helping with management and study administration.

CR Abrahamse W, 2007, J ENVIRON PSYCHOL, V27, P265, DOI 10.1016/j.jenvp.2007.08.002



- Allcott H, 2011, J PUBLIC ECON, V95, P1082, DOI 10.1016/j.jpubeco.2011.03.003
- Azar E., 2011, J COMPUT CIVIL ENG, V26, P506, DOI DOI 10.1061/(ASCE)CP.1943-5487.0000158
- Azar E, 2012, ENERGBUILDINGS, V55, P841, DOI 10.1016/j.enbuild.2012.10.002
- BECKER LJ, 1978, J APPL PSYCHOL, V63, P428, DOI 10.1037/0021-9010.63.4.428
- Carrico AR, 2011, J ENVIRON PSYCHOL, V31, P1, DOI 10.1016/j.jenvp.2010.11.004
- Chen VL, 2014, ENERGBUILDINGS, V70, P455, DOI 10.1016/j.enbuild.2013.11.069
- Coleman MJ, 2013, BUILD RES INF, V41, P637, DOI 10.1080/09613218.2013.808958
- Dietz T, 2009, P NATL ACAD SCI USA, V106, P18452, DOI 10.1073/pnas.0908738106
- Energy Information Agency, 2009, EM GREENH GAS US REP
- Environmental Protection Agency, 2013, BUILD THEIR IMP ENV
- Fischer C, 2008, ENERGBUILDINGS, V1, P79, DOI 10.1007/s12053-008-9009-7
- Foster D, 2012, P 6 NORD C HUM COMP, P178
- Froehlich J, 2010, CHI2010: PROCEEDINGS OF THE 28TH ANNUAL CHI CONFERENCE ON HUMAN FACTORS IN COMPUTING SYSTEMS, VOLS 1-4, P1999
- Grevet Catherine, 2010, P 43 HAW INT C SYST, P1
- Gulbinas R., 2013, P 2013 INT C APPL EN
- Gulbinas R., 2013, J COMPUT CIVIL ENG, V28, P89
- International Organizations for Standardization, 2013, ISO 50001 EN MAN
- Iyer M, 2006, ENERGBUILDINGS, V38, P988, DOI 10.1016/j.enbuild.2005.11.009
- Jain RK, 2013, ENERGBUILDINGS, V66, P119, DOI 10.1016/j.enbuild.2013.06.029
- Jain RK, 2013, ENERGBUILDINGS, V64, P408, DOI 10.1016/j.enbuild.2013.05.011
- Jain RK, 2012, ENERGBUILDINGS, V48, P8, DOI 10.1016/j.enbuild.2011.12.033
- Marans RW, 2010, INT J SUST HIGHER ED, V11, P6, DOI 10.1108/14676371011001011
- McCalley LT, 2002, J ECON PSYCHOL, V23, P589, DOI 10.1016/S0167-4870(02)00119-8
- Murtagh N, 2013, ENERGBUILDINGS, V62, P717, DOI 10.1016/j.enpol.2013.07.090
- Nolan JM, 2008, PERS SOC PSYCHOL B, V34, P913, DOI 10.1177/0146167208316691
- Peschiera G, 2012, ENERGBUILDINGS, V49, P584, DOI 10.1016/j.enbuild.2012.03.011
- Peschiera G, 2010, ENERGBUILDINGS, V42, P1329, DOI 10.1016/j.enbuild.2010.03.001
- Petersen E., 2007, INT J SUSTAINABILITY, V8, P16, DOI DOI 10.1108/14676370710717562
- Petkov P., 2011, P 5 INT C COMM TECHN, P21
- Randazzo KV, 2011, RECONSIDERING WHAT W
- RESNET, 2013, MORT IND NAT HOM EN
- Schultz PW, 2007, PSYCHOL SCI, V18, P429, DOI 10.1111/j.1467-9280.2007.01917.x
- SELIGMAN C, 1978, ENERGBUILDINGS, V1, P325, DOI 10.1016/0378-7788(78)90012-9
- Siero FW, 1996, J ENVIRON PSYCHOL, V16, P235, DOI 10.1006/jevp.1996.0019
- Ueno T, 2006, APPL ENERGBUILDINGS, V83, P166, DOI 10.1016/j.apenergy.2005.02.002
- United States Postal Service, 2012, POST SERV SAV MILL E
- U.S. Department of Energy, 2013, BUILD EN DAT BOOK
- US Green Buildings Council, 2007, BUILD CLIM CHANG DOC
- United States Green Building Council, 2013, LEED RAT SYST
- US. Small Business Administration, 2013, SMALL BUS TRENDS
- United States White House, 2012, ADM ANN NEW TOOLS HE
- Wood G, 2007, ENERGBUILDINGS, V39, P495, DOI 10.1016/j.enbuild.2006.06.009
- Zhang YX, 2013, ENERGBUILDINGS, V62, P1120, DOI 10.1016/j.enpol.2013.07.036
- NR 44
- TC 28
- Z9 28
- U1 4
- U2 37
- PU ELSEVIER SCIENCE SA
- PI LAUSANNE
- PA PO BOX 564, 1001 LAUSANNE, SWITZERLAND
- SN 0378-7788
- EI 1872-6178
- J9 ENERGBUILDINGS
- J1 Energy Build.
- PD DEC
- PY 2014

VL 84

BP 493

EP 500

DI 10.1016/j.enbuild.2014.08.017

PG 8

WC Construction & Building Technology; Energy & Fuels; Engineering, Civil

SC Construction & Building Technology; Energy & Fuels; Engineering

GA AT8KJ

UT WOS:000345182000048

DA 2018-05-03

ER

PT J

AU Gamtessa, SF

AF Gamtessa, Samuel Faye

TI An explanation of residential energy-efficiency retrofit behavior in  
Canada

SO ENERGY AND BUILDINGS

LA English

DT Article

DE Home energy-efficiency audits; Energy-efficiency retrofits;

Energy-efficiency retrofit behavior; Zero-inflated count data estimation

ID WILLINGNESS-TO-PAY; CONSERVATION; MODEL; DIFFUSION; POLICY

AB In 1998 the Canadian government introduced the EnerGuide for Houses (EGH) program, essentially consisting of home energy audits with financial incentives provided to the homeowner upon verification that sufficient auditor-recommended upgrades were undertaken to achieve energy savings. In this study, we analyze the EGH data compiled between October 1998 and September 2005 to determine what types of households chose to participate and what appear to be the main factors underlying retrofit decisions. In the program, homeowners were prescribed specific upgrade types in the first audit. Hence, the decision problem involves whether to retrofit at all and how many of the prescribed upgrades to adopt. Moreover, the second audit that reveals this decision does not reflect the possibility that some homeowners might have undertaken the recommended upgrades but opted not to or have yet to undergo the second audit. We adopt an econometric technique that takes these features of the data into account. We find that energy cost savings, financial incentives, and costs of retrofits are important factors behind retrofit decisions given several other home- and household-specific characteristics. (c) 2012 Elsevier B.V. All rights reserved.

C1 [Gamtessa, Samuel Faye] Mt Allison Univ, Dept Econ, Sackville, NB E0A 3C0, Canada.

RP Gamtessa, SF (reprint author), Room AVDX 233,144 Main St, Sackville, NB E4L 1A7, Canada.

EM sgamtessa@mta.ca

CR Aydinalp M., 2001, CREEDAC20010403 DALH

Banfi S, 2008, ENERG ECON, V30, P503, DOI 10.1016/j.eneco.2006.06.001

Braun FG, 2010, ENERG POLICY, V38, P5493, DOI 10.1016/j.enpol.2010.04.002

Cameron A. C., 2005, MICROECONOMETRICS ME

CAMERON TA, 1985, REV ECON STAT, V67, P205, DOI 10.2307/1924719

Cameron T.A., 1988, 520 U CAL DEP EC

Clinch JP, 2003, ENERG ECON, V25, P565, DOI 10.1016/S0140-9883(03)00051-3

Deutscher T., 1980, ROLE HOME ENERGY AUD

Finance Canada, 2005, TECHNICAL REPORT

Galvin R, 2010, ENERG BUILDINGS, V42, P834, DOI 10.1016/j.enbuild.2009.12.004

Gillingham K, 2009, ANNU REV RESOUR ECON, V1, P597, DOI 10.1146/annurev.resource.102308.124234

Greene W. H., 2003, ECONOMETRIC ANAL

Grosche P, 2009, ENERG J, V30, P135

Guler B., 1999, CREEDAC1999126 DALH

Hausman J.A., 1979, BELL J ECON, V10, P3

Jaccard M., 2002, COSTS CLIMATE POLICY

Jacoby HD, 2004, GLOBAL ENVIRON CHANG, V14, P287, DOI 10.1016/j.gloenvcha.2004.04.006

KARSHENAS M, 1993, RAND J ECON, V24, P503, DOI 10.2307/2555742

LONG JE, 1993, ENERG ECON, V15, P232, DOI 10.1016/0140-9883(93)90012-G

Maddala G., 1983, LTD DEPENDENT QUALIT

Mahapatra K, 2008, ENER POLICY, V36, P577, DOI 10.1016/j.enpol.2007.10.006  
 McKay S, 2004, ENER BUILDINGS, V36, P237, DOI 10.1016/j.enbuild.2003.12.001  
 NRCan, 2005, EN CONS MAJ HOUS APP  
 [Anonymous], 2005, EN EFF TRENDS CAN 19  
 NRCan, 1997, 1994 HOM EN RETR SUR  
 NRCan, 2006, SURV HOUS EN US 2003  
 Ryan D.L., 2003, INTEGRATING ENERGY M  
 Sadler M., 2003, HOME ENERGY PREFEREN  
 Ugursal VI, 1996, ENER BUILDINGS, V24, P137  
 Winkelmann R., 2008, ECONOMETRIC ANAL COU  
 Young D, 2008, ENER POLICY, V36, P553, DOI 10.1016/j.enpol.2007.09.034

NR 31

TC 28

Z9 28

U1 1

U2 20

PU ELSEVIER SCIENCE SA

PI LAUSANNE

PA PO BOX 564, 1001 LAUSANNE, SWITZERLAND

SN 0378-7788

J9 ENER BUILDINGS

JI Energy Build.

PD FEB

PY 2013

VL 57

BP 155

EP 164

DI 10.1016/j.enbuild.2012.11.006

PG 10

WC Construction &amp; Building Technology; Energy &amp; Fuels; Engineering, Civil

SC Construction &amp; Building Technology; Energy &amp; Fuels; Engineering

GA 087BF

UT WOS:000314735500018

DA 2018-05-03

ER

PT J

AU Chow, LCH

AF Chow, LCH

TI A study of sectoral energy consumption in Hong Kong (1984-97) with  
 special emphasis on the household sector

SO ENERGY POLICY

LA English

DT Article

DE sectoral energy consumption; energy transition; household energy  
 consumption

AB This study consists of two major parts. The first part deals with the changes in the pattern of sectoral energy consumption from 1984 to 1997, when the sectoral share of industry plummeted from 33.2% to 14.6%, whereas the share of the commercial sector advanced from 20.0% to 29.9%, trailed by smaller rises in the transportation and household sectors. Three factors contributed to these developments : First, changes in the economic structure, i.e. the decline in the role of manufacturing caused by the northward movement of industries into the Mainland, and the accompanying rise in the role of the tertiary activities; secondly, government policy and planning issues relating to the spatial development of Hong Kong; thirdly, the phenomenal hiking in living standard.

The second part analyses household energy consumption in light of the energy transition model.

Electricity played an increasingly important role in satisfying household energy demand, while LPG and kerosene were displaced by town gas as heating fuels. Lastly, ramifications of the study are presented. (C) 2001 Elsevier Science Ltd. All rights reserved.

C1 Hong Kong Baptist Univ, Dept Geog, Hong Kong Energy Studies Ctr, Kowloon, Hong Kong, Peoples R China.

RP Chow, LCH (reprint author), Hong Kong Baptist Univ, Dept Geog, Hong Kong Energy Studies Ctr, Kowloon, Hong Kong, Peoples R China.

CR CHOW LC, 1985, EC B ASIA PACIFIC, V36, P26

CHOW LCH, 2001, OPEC REV, V25, P79

CHOW LCH, 1989, RESOURCES ENV REGION, P462

CHOW LCH, 2000, OPEC REV, V24, P87

\*EL MECH SERV DEP, 1998, HONG KONG EN END US

\*ESCAP, 1991, SECT EN DEM STUD APP

GARCIA RA, 1994, ENERGY, V19, P539, DOI 10.1016/0360-5442(94)90050-7

HILLS P, 1991, HOUSEHOLD ENERGY TR

\*IEA, 1999, EN BAL NONOECD COUNT

\*IEA, 2000, EN BAL OECD COUNTR 1

Lam JC, 1996, ENERGY, V21, P1, DOI 10.1016/0360-5442(95)00089-5

LAM JC, 1994, ENERGY, V19, P1157, DOI 10.1016/0360-5442(94)90072-8

Lam PL, 1996, ENER G POLICY, V24, P713, DOI 10.1016/0301-4215(96)00037-7

LAM PL, 2000, COMPETITION HONG KON

LEACH G, 1992, ENER G POLICY, V20, P116, DOI 10.1016/0301-4215(92)90105-B

PONGSAPICH A, 1994, ENERGY, V19, P509, DOI 10.1016/0360-5442(94)90047-7

Soussan J., 1988, PRIMARY RESOURCES EN

\*WORLD BANK, 1985, CHIN EN SECT ANN 3 C

NR 18

TC 28

Z9 28

U1 0

U2 6

PU ELSEVIER SCI LTD

PI OXFORD

PA THE BOULEVARD, LANGFORD LANE, KIDLINGTON, OXFORD OX5 1GB, OXON, ENGLAND

SN 0301-4215

J9 ENER G POLICY

JI Energy Policy

PD NOV

PY 2001

VL 29

IS 13

BP 1099

EP 1110

DI 10.1016/S0301-4215(01)00046-5

PG 12

WC Economics; Energy & Fuels; Environmental Sciences; Environmental Studies

SC Business & Economics; Energy & Fuels; Environmental Sciences & Ecology

GA 475PC

UT WOS:000171172300004

DA 2018-05-03

ER

PT J

AU Beal, CD

Bertone, E

Stewart, RA

AF Beal, Cara D.

Bertone, Edoardo

Stewart, Rodney A.

TI Evaluating the energy and carbon reductions resulting from resource-efficient household stock

SO ENERGY AND BUILDINGS

LA English

DT Article

DE Water end-uses; Micro-components; Climate change; Climate adaptation;

Energy-efficient technology; Carbon footprint; Intervention strategies;

Greenhouse gas; Water heating

ID GREENHOUSE-GAS EMISSIONS; WATER; SYSTEMS; WASTE

AB The nexus of water and energy and greenhouse gas emissions is now well recognised, however, quantifying the energy savings from (hot) water-efficient technologies has been largely based on modelled or assumed consumption data from water use appliances and fixtures. The aim of this paper is to determine water, energy and greenhouse gas emission savings from resource-efficient household stock using empirical water end-use data and detailed stock specifications for homes in Queensland, Australia. Hot water system type is considered with comparisons made between intervention scenarios with and without inclusion of a low energy heating system. The results confirm the significant impact that coal-fired electricity water heating has on total household energy consumption. Further, it appears that substantial savings can be achieved by substituting water (e.g. high star rating appliances) and energy (e.g. solar hot water system) efficient appliances in the home. The findings also suggest that retrofitting cheaper resource-efficient technologies are still an effective means of reducing both water and energy consumption, regardless of hot water system type. Future work in this area is needed to expand the current research outcomes, such as the consideration of all thermal losses from heating systems and the use of empirical energy end-use data. (C) 2012 Elsevier B.V. All rights reserved.

C1 [Beal, Cara D.; Bertone, Edoardo; Stewart, Rodney A.] Griffith Univ, Smart Water Res Ctr, Nathan, Qld 4222, Australia.

[Bertone, Edoardo; Stewart, Rodney A.] Griffith Univ, Ctr Infrastruct Engn & Management, Nathan, Qld 4222, Australia.

RP Beal, CD (reprint author), Griffith Univ, Smart Water Res Ctr, Gold Coast Campus, Nathan, Qld 4222, Australia.

EM c.beal@griffith.edu.au; edobert@hotmail.it; r.stewart@griffith.edu.au

RI Beal, Cara/D-1138-2016

OI Beal, Cara/0000-0002-9219-2120

FU Urban Water Security Research Alliance

FX The authors would like to acknowledge the Urban Water Security Research Alliance for funding the SEQREUS upon which much of this data was based.

CR Australian Government, 2011, NAT GREENH ACC NGA F

Australian Government, E3 EQ EN EFF COMM AU

Australian Government, WAT EFF LAB STAND WE

Beal C., 2011, J AUSTR WATER ASS, V38, P80

Beal C.D., 2011, 47 URB WAT SEC RES A

Beal C.D., 2011, J CLEANER PRODUCTION

Blum P, 2010, RENEW ENERG, V35, P122, DOI 10.1016/j.renene.2009.03.034

Cheng CL, 2002, ENERG BUILDINGS, V34, P261, DOI 10.1016/S0378-7788(01)00097-4

Clarke A., 2009, FULL TECHNICAL REPOR

Cobos E., 2010, THESIS GRIFFITH U GO

Crawford RH, 2003, BUILD RES INF, V31, P34, DOI 10.1080/09613210210160800

Dakwale VA, 2011, SUSTAIN CITIES SOC, V1, P211, DOI 10.1016/j.scs.2011.07.007

DeOreo W., 2001, END USES HOT WATER S, P11

DIP, 2007, QUEENSL DEV COD

Fidar A, 2010, SCI TOTAL ENVIRON, V408, P5828, DOI 10.1016/j.scitotenv.2010.08.006

Flower D., 2009, THESIS MONASH U

Flower D., 2007, 13 INT RAINW CATCHM

Frijia S., 2011, ENVIRON SCI TECHNOL, V46, P1782

Gleick PH, 2010, SCIENCE, V328, P689, DOI 10.1126/science.328.5979.689

Gleick PH, 2003, SCIENCE, V302, P1524, DOI 10.1126/science.1089967

Golden JS, 2010, J INTEGR ENVIRON SCI, V7, P53, DOI 10.1080/19438150903541873

Hall MR, 2011, ENVIRON SCI TECHNOL, V45, P5434, DOI 10.1021/es103939a

Kenway SJ, 2011, WATER SCI TECHNOL, V63, P1983, DOI 10.2166/wst.2011.070

Kenway S. J., 2008, CSIRO WATER HLTH COU

Lee MS, 2012, J ENVIRON MANAGE, V101, P75, DOI 10.1016/j.jenvman.2012.02.010

Lenzen M, 2010, J IND ECOL, V14, P73, DOI 10.1111/j.1530-9290.2009.00190.x

Lund JW, 2004, GHC B, V2004, P1  
 Maas C., 2009, 0901 POLIS  
 Mayer P., 2004, TAMPA WATER DEP RESI  
 Morrison GL, 2004, SOL ENERGY, V76, P147, DOI 10.1016/j.solener.2003.08.007  
 Pachauri S, 2004, ENER POLICY, V32, P1723, DOI 10.1016/S0301-4215(03)00162-9  
 Pakula C, 2010, ENER EFFIC, V3, P365, DOI 10.1007/s12053-009-9072-8  
 Perry S, 2008, ENERGY, V33, P1489, DOI 10.1016/j.energy.2008.03.008  
 Rothausen SGSA, 2011, NAT CLIM CHANGE, V1, P210, DOI 10.1038/NCLIMATE1147  
 Solomon SD, 2007, 4 INT PAN CLIM CHANG  
 Stamminger R, 2011, ENER EFFIC, V4, P559, DOI 10.1007/s12053-011-9114-x  
 Tsilingiridis G, 2010, RENEW ENER, V35, P490, DOI 10.1016/j.renene.2009.05.001  
 Widen J, 2009, ENER BUILDINGS, V41, P753, DOI 10.1016/j.enbuild.2009.02.013  
 Willis RM, 2010, RESOUR CONSERV RECY, V54, P1117, DOI 10.1016/j.resconrec.2010.03.004  
 Willis R.M., 2011, J CLEANER PRODUCTION

NR 40

TC 26

Z9 26

U1 2

U2 32

PU ELSEVIER SCIENCE SA

PI LAUSANNE

PA PO BOX 564, 1001 LAUSANNE, SWITZERLAND

SN 0378-7788

J9 ENER BUILDINGS

JI Energy Build.

PD DEC

PY 2012

VL 55

BP 422

EP 432

DI 10.1016/j.enbuild.2012.08.004

PG 11

WC Construction & Building Technology; Energy & Fuels; Engineering, Civil

SC Construction & Building Technology; Energy & Fuels; Engineering

GA 065MK

UT WOS:000313152400045

DA 2018-05-03

ER

PT J

AU Niemeyer, S

AF Niemeyer, Shirley

TI Consumer voices: adoption of residential energy-efficient practices

SO INTERNATIONAL JOURNAL OF CONSUMER STUDIES

LA English

DT Article

DE Barriers; constraints; consumer; energy; household; residential

ID CO2

AB The purpose of this research is to identify constraining variables that may impinge on adopting energy-efficient practices, materials, equipment and technology in households. The intent is to uncover relationships of attitudes, beliefs, knowledge and other resource constraints to: (1) existing housing adaptations and adjustments for energy efficiency; and (2) more efficient use of energy in homes. A second objective is to identify existing practices used to reduce energy use and the adaptations made to the existing structure, materials, equipment and technology for energy efficiency as well as their intentions to make future adaptations. Constraint variables include knowledge of existing energy-efficient practices and technology; economic constraints (household income, cost as a problem, financial need and existing energy costs); obstacles to making changes (lack of information, assistance, time, cooperation, trained persons and the condition of home); and demographic variables (age, education level and urban/rural). Attitude and

belief constraints include measures of felt responsibility for energy use-related actions that impact the natural resources and environment, and measures of concern. These constraints may impinge on or contribute to making energy-efficient changes in residential households. Questionnaires were mailed to a random stratified sample of 800 households in Nebraska (US state) in April and May of 2008, resulting in a 29% return rate. The analysis indicates that the research produced information about constraining factors that impact the existing energy-efficiency levels of households. The use of energy-efficient equipment and technology, and behaviour practices that reduce energy use are related to those barriers. However, residential energy use and behaviour change result from a range of psychological and contextual influences on behaviour. Behaviour is often inconsistent with attitudes because of the presence of various constraining factors that preclude consistency with behaviour. Educational programmes have a challenging task if they are to alter attitudes and norms to overcome situational constraints. It may be more fruitful to educate and to remove the constraints impinging on those who already have a positive attitude about the need to increase energy efficiency for whatever reason.

C1 Univ Nebraska, Lincoln, NE 68583 USA.

RP Niemeier, S (reprint author), Univ Nebraska, Room 205, HE Bldg, East Campus, Lincoln, NE 68583 USA.

EM sniemeyer2@unl.edu

CR BARNOLA JM, 1987, NATURE, V329, P408, DOI 10.1038/329408a0

Barnola J.-M., 2003, TRENDS COMPENDIUM DA

Dillman DA, 1978, MAIL TELEPHONE SURVE

GMELCH L, 1988, HOUSING SOC, V13, P238

GUERIN DA, 2000, FAMILY CONSUMER SCI, V29, P48, DOI DOI 10.1177/1077727X00291003

Morris E. W., 1978, HOUSING FAMILY SOC

Ngo AT, 2009, INT J CONSUM STUD, V33, P151, DOI 10.1111/j.1470-6431.2009.00763.x

NIEMEYER S, 1982, THESIS IOWA STATE U

PETERSON J, 2006, EC EFFECTS RECENT IN, pR7

Salant P., 1994, CONDUCT YOUR OWN SUR

Socolow R, 2004, ENVIRONMENT, V46, P8, DOI 10.1080/00139150409605818

\*US DEP HHS, 2005, DIET GUID AM, P1

\*US DOE, 2005, DOEEIA05732004 OFF E

\*US DOE, 2005, DOEEIA05732005 OFF E

\*US DOE, 2008, EN SAV TIPS SAV EN M

[Anonymous], 2006, AM EN REN PATH EN SE, P19

YUST BL, 2002, J FAMILY CONSUMER SC, V30, P323, DOI DOI 10.1177/1077727X02030003001

NR 17

TC 26

Z9 26

U1 1

U2 20

PU WILEY-BLACKWELL

PI MALDEN

PA COMMERCE PLACE, 350 MAIN ST, MALDEN 02148, MA USA

SN 1470-6423

J9 INT J CONSUM STUD

J1 Int. J. Consum. Stud.

PD MAR

PY 2010

VL 34

IS 2

BP 140

EP 145

DI 10.1111/j.1470-6431.2009.00841.x

PG 6

WC Business

SC Business & Economics

GA 631HJ

UT WOS:000280337100005

DA 2018-05-03

ER

PT J

AU Wall, R

Crosbie, T

AF Wall, Rob

Crosbie, Tracey

TI Potential for reducing electricity demand for lighting in households: An exploratory socio-technical study

SO ENERGY POLICY

LA English

DT Article

DE Lighting; Household; Electricity

ID ENERGY USE; BEHAVIOR; QUESTIONS

AB Illuminance data were collected from 18 UK dwellings during 1-week periods in spring 2007, to establish when luminaires were used and to calculate electricity consumption for lighting. Householders were also interviewed about lighting use and choices. The potential for reducing lighting electricity consumption by replacing incandescent bulbs with compact fluorescent lamps (CFLs) is assessed. Mean weekly electricity consumption for lighting was 3.756kWh and mean proportion of total electricity consumption used for lighting was 6.55%. It is notable, however, that participants generally expressed high levels of environmental awareness and that electricity consumption figures for less environmentally-aware households may differ. On average, households could have reduced lighting electricity consumption by 50.9% if all incandescent bulbs were replaced with CFLs. Even householders making extensive use of efficient lighting technologies expressed concerns about these technologies' performance, but seemed willing to tolerate perceived shortcomings for environmental reasons. However, the study raises questions about whether people without strong environmental motivations can be convinced that efficient lighting technologies will meet their needs. It also raises questions about the effectiveness of policies phasing out general lighting service incandescent bulbs, as there is a risk that householders may switch to tungsten halogen bulbs rather than low-energy options. (C) 2008 Elsevier Ltd. All rights reserved.

C1 [Wall, Rob] De Montfort Univ, Inst Energy & Sustainable Dev, Leicester LE1 9BH, Leics, England.

[Crosbie, Tracey] Univ Teesside, Sch Sci & Technol, Ctr Construct Innovat & Res, Middlesbrough TS1 3BA, Cleveland, England.

RP Wall, R (reprint author), De Montfort Univ, Inst Energy & Sustainable Dev, Leicester LE1 9BH, Leics, England.

EM rdw3000@yahoo.com; t.crosbie@tees.ac.uk

OI Crosbie, Tracey/0000-0002-9355-4816

FU Carbon Trust; Engineering and Physical Sciences Research Council; Economic and Social Research Council; Natural Environment Research Council

FX This work forms part of the Carbon Reduction in Buildings (CaRB) Consortium. CaRB has five UK partners: De Montfort University, University College London, The University of Reading, The University of Manchester and The University of Sheffield. CaRB is supported by the Carbon Vision initiative, which is jointly funded by the Carbon Trust and Engineering and Physical Sciences Research Council, with additional support from the Economic and Social Research Council and Natural Environment Research Council. The partners are assisted by a steering panel of representatives from UK industry and government. See <http://www.carb.org.uk> for further details. In particular, the authors wish to thank Graeme Stuart for assistance with analysis of lighting data and Keith Baker for assistance with interviews.

CR Abrahamse W, 2005, J ENVIRON PSYCHOL, V25, P273, DOI 10.1016/j.jenvp.2005.08.002

Bamberg S, 2003, ENVIRON BEHAV, V35, P264, DOI 10.1177/0013916502250134

\*BERR DEP BUS ENT, 2007, EN TRENDS SEPT 2007

BLACK JS, 1985, J APPL PSYCHOL, V70, P3, DOI 10.1037//0021-9010.70.1.3

\*BSRIA, 2007, MANY POL DOES IT TAK

\*COI, 2007, ATT CLIM CHANG WAV, V5

CROSBIE T, 2008, ENERGY ENV, V19, P979

Crosbie T., 2006, ENERGY ENV, V17, P735, DOI DOI 10.1260/0958-305X.17.5.735



Darby S, 2006, EFFECTIVENESS FEEDBA  
\*DCLG, 2006, SURV ENGL HOUS PROV  
DEFRA, 2007, EN GUZZL LIGHTB PHAS  
DEFRA, 2007, SURV PUBL ATT BEH EN, P22  
\*DOE, 2008, EN EFF WHIT LEDS  
DTI, 2002, EN CONS UK  
\*EST, 2008, EN SAV LIGHT BULBS B  
Firth S, 2008, ENERG BUILDINGS, V40, P926, DOI 10.1016/j.enbuild.2007.07.005  
Gatersleben B, 2002, ENVIRON BEHAV, V34, P335, DOI 10.1177/0013916502034003004  
Gram-Hanssen K, 2004, P ACEEE 2004 SUMM ST, V7, P74  
Harland P, 1999, J APPL SOC PSYCHOL, V29, P2505, DOI 10.1111/j.1559-1816.1999.tb00123.x  
Hedges A, 1991, ATTITUDES ENERGY CON  
\*HM GOV, 2008, CLIM CHANG BILL HL  
Krantz H, 2007, P 2007 EUR COUNC EN, P1175  
LUTZENHISER L, 1993, ANNU REV ENERG ENV, V18, P247, DOI 10.1146/annurev.energy.18.1.247  
\*MTP, 2008, BRIEF NOT DOM LIGHT, V101  
\*MTP, 2008, BRIEF NOT DOM LIGHT  
Patton M. Q., 1990, QUALITATIVE EVALUATI  
Rasmussen T., 2007, P 2007 EUR COUNC EN  
Robson C, 2002, REAL WORLD RES  
Rogers E., 2003, DIFFUSION INNOVATION  
Schwarz N, 1999, AM PSYCHOL, V54, P93, DOI 10.1037/0003-066X.54.2.93  
Schwarz N, 2001, AM J EVAL, V22, P127, DOI 10.1177/109821400102200202  
Stern PC, 2000, J SOC ISSUES, V56, P407, DOI 10.1111/0022-4537.00175  
STOKES M, 2006, P 2006 ROYAL I CHART  
Tourangeau R., 2000, PSYCHOL SURVEY RESPO  
Ueno T, 2006, APPL ENERG, V83, P166, DOI 10.1016/j.apenergy.2005.02.002  
UNSELD C, 1981, MARKETING SOLAR ENER, P110  
van Meter K M, 1990, NIDA Res Monogr, V98, P31  
Wall R, 2007, ENVIRON BEHAV, V39, P731, DOI 10.1177/0013916506294594  
Wilhite H, 1996, ENERG POLICY, V24, P795, DOI 10.1016/0301-4215(96)00061-4  
ZISSIS G, 2007, ESTIMATING IMPACT LA  
2007, WHICH MAGAZINE, P66  
NR 41  
TC 26  
Z9 26  
U1 1  
U2 10  
PU ELSEVIER SCI LTD  
PI OXFORD  
PA THE BOULEVARD, LANGFORD LANE, KIDLINGTON, OXFORD OX5 1GB, OXON, ENGLAND  
SN 0301-4215  
J9 ENERG POLICY  
JI Energy Policy  
PD MAR  
PY 2009  
VL 37  
IS 3  
BP 1021  
EP 1031  
DI 10.1016/j.enpol.2008.10.045  
PG 11  
WC Economics; Energy & Fuels; Environmental Sciences; Environmental Studies  
SC Business & Economics; Energy & Fuels; Environmental Sciences & Ecology  
GA 415OF  
UT WOS:000263942700026  
DA 2018-05-03  
ER

PT J

AU Westergren, KE

Hogberg, H

Norlen, U

AF Westergren, KE

Hogberg, H

Norlen, U

TI Monitoring energy consumption in single-family houses

SO ENERGY AND BUILDINGS

LA English

DT Article

DE energy signature models; monitoring end-use energy for heating; climate standardization; sample design; Internet-based data communication

AB A technical and statistical solution to the problem of obtaining timely and reliable estimates of end-use energy consumption in single-family houses is presented. This approach is called 'The Energy Barometer' to allude to its possibility to follow the 'pressure' on the energy market. Recently developed Internet-based communication techniques are used to monitor building energy end-use at short time-intervals. We describe how this new technology is combined with statistical methods based on Energy Signature models into a system. Measured energy use from a random sample of houses is standardized for each investigated house by (i) statistically regressing energy data against climate data and (ii) using climate data for a 'normal' year together with the obtained regression equation to determine average annual energy use. The results are generalized to apply for the studied building stock by using a weighting procedure. (C) 1999 Elsevier Science S.A. All rights reserved.

C1 Royal Inst Technol, KTH, Ctr Built Environm, S-80102 Gavle, Sweden.

RP Westergren, KE (reprint author), Royal Inst Technol, KTH, Ctr Built Environm, S-80102 Gavle, Sweden.

CR ANDERLIND G, 1984IE BKL LUND I TE

BOMAN CA, 1993, TN42 NAT SWED I BUIL

Cochran WG, 1977, SAMPLING TECHNIQUES

FLOUQUET F, 1992, ENERGBUILDINGS, V19, P113, DOI 10.1016/0378-7788(92)90005-2

GAUNT L, 1985, HABITS ENERGY MEDDEL

Greene W., 1993, ECONOMETRIC ANAL

HAMMARSTEN S, 1987, APPL ENERGB, V26, P2

HAMMARSTEN S, 1984, B NATL SWEDISH I BUI, P18

HARVEY AC, 1981, EC ANAL TIME SERIES

HOGBERG H, 1991, TN24 NAT SWED I BUIL

Kish L., 1987, STAT DESIGN RES

LINDFORS A, 1998, EPIC 98 LYON FRANX

LINDFORS A, 1995, SOME ASPECTS EMPIRIC

Ljung L., 1991, SYSTEM IDENTIFICATIO

Lundstrom E., 1986, OCCUPANT INFLUENCE E

MEIER AK, 1988, ENERGBUILDINGS, V12, P77, DOI 10.1016/0378-7788(88)90057-6

NORLEN U, 1995, WORKSH APPL SYST ID

NORLEN U, 1985, M857 NAT SWED I BUIL

NORLEN U, 1993, D10 SWD COUC BUILD R

NORLEN U, 1994, M857 NAT SWED I BUIL

PETTERSEN TD, 1994, ENERGBUILDINGS, V21, P209, DOI 10.1016/0378-7788(94)90036-1

Sarndal CE, 1992, MODEL ASSISTED SURVE

Schipper LJ, 1996, MITIGATION ADAPTATIO, V1, P167

Soderstrom T, 1989, SYSTEM IDENTIFICATIO

WALLER T, 1998, THESIS ROYAL I TECHN

WESTEREGREN KE, 1998, 47 U COLL GAVL SWED

WESTEREGREN KE, 1998, ENERGY BAROMETER SWE

WOOUTERS P, 1994, EUR C EN PERF IND CL, P19

NR 28

TC 26

Z9 26

U1 1

U2 3  
 PU ELSEVIER SCIENCE SA  
 PI LAUSANNE  
 PA PO BOX 564, 1001 LAUSANNE, SWITZERLAND  
 SN 0378-7788  
 J9 ENERGBUILDINGS  
 JI Energy Build.  
 PD MAR  
 PY 1999  
 VL 29  
 IS 3  
 BP 247  
 EP 257  
 DI 10.1016/S0378-7788(98)00065-6  
 PG 11  
 WC Construction & Building Technology; Energy & Fuels; Engineering, Civil  
 SC Construction & Building Technology; Energy & Fuels; Engineering  
 GA 162AW  
 UT WOS:000078323700005  
 DA 2018-05-03  
 ER

PT J  
 AU HACKETT, B  
     LUTZENHISER, L  
 AF HACKETT, B  
     LUTZENHISER, L  
 TI SOCIAL-STRUCTURES AND ECONOMIC CONDUCT - INTERPRETING VARIATIONS IN  
    HOUSEHOLD ENERGY-CONSUMPTION  
 SO SOCIOLOGICAL FORUM  
 LA English  
 DT Article  
 DE ENERGY CONSUMPTION; ECONOMICS; SOCIAL STATUS; TECHNOLOGY  
 C1 WASHINGTON STATE UNIV,DEPT SOCIOL,PULLMAN,WA 99164.  
    WASHINGTON STATE UNIV,DEPT RURAL SOCIOL,PULLMAN,WA 99164.  
 RP HACKETT, B (reprint author), UNIV CALIF DAVIS,DEPT SOCIOL,DAVIS,CA 95616, USA.  
 RI Quezada, George/I-1106-2012  
 OI Quezada, George/0000-0002-4060-6109  
 CR Arrow K, 1987, RATIONAL CHOICE  
    BUTTEL FH, 1979, SOCIOPOLITICAL EFFIC  
    Cross J.G., 1983, THEORY ADAPTIVE EC B  
    DEUTSCHER I, 1973, WHAT WE SAY WHAT WE  
    Dewey J., 1925, EXPERIENCE NATURE  
    Douglas Marry, 1979, WORLD GOODS  
    Ewen S., 1976, CAPTAINS CONSCIOUSNE  
    FRIEDMAN D, 1988, SOCIOLOGICAL THEORY, V6, P201, DOI DOI 10.2307/202116  
    GRANOVETTER M, 1985, AM J SOCIOL, V91, P481, DOI 10.1086/228311  
    HACKETT B, 1987, ENERGY EFFICIENCY PE  
    HARDIN G, 1968, SCIENCE, V162, P1243  
    HERSCHLEIFER J, 1985, AM ECON REV, V75, P53  
    KEMPTON W, 1982, ENERGY, V7, P817, DOI 10.1016/0360-5442(82)90030-5  
    Marshall TH, 1964, CLASS CITIZENSHIP SO  
    MAZUR A, 1974, SCIENCE, V186, P607, DOI 10.1126/science.186.4164.607  
    McCloskey Donald, 1985, RHETORIC EC  
    NADER L, 1978, ANNU REV ENERGY, V3, P1, DOI 10.1146/annurev.eg.03.110178.000245  
    NELSON S, 1981, ENERGY SAVINGS ATTRI  
    Parsons T., 1956, EC SOC  
    ROSA E, 1981, P INT C APPLIED SYST, P258

ROSA EA, 1988, ANNU REV SOCIOL, V14, P149, DOI 10.1146/annurev.so.14.080188.001053  
 SCHIPPER L, 1976, SCIENCE, V194, P1001, DOI 10.1126/science.194.4269.1001  
 SCHIPPER L, 1985, ANNU REV ENERGY, V10, P341, DOI 10.1146/annurev.eg.10.110185.002013  
 Schnaiberg Allan, 1980, ENV SURPLUS SCARCITY  
 Simon HA, 1982, MODELS BOUNDED RATIO  
 Socolow R., 1978, SAVING ENERGY HOME P  
 STERN PC, 1986, J POLICY ANAL MANAG, V5, P200, DOI 10.2307/3323541  
 Stern P. C., 1984, ENERGY USE HUMAN DIM  
 Veblen Thorstein, 1979, THEORY LEISURE CLASS  
 VINE EL, 1982, ENERGY, V7, P909, DOI 10.1016/0360-5442(82)90039-1

NR 30

TC 26

Z9 26

U1 0

U2 4

PU PLENUM PUBL CORP

PI NEW YORK

PA 233 SPRING ST, NEW YORK, NY 10013

SN 0884-8971

J9 SOCIOL FORUM

J1 Sociol. Forum

PD SEP

PY 1991

VL 6

IS 3

BP 449

EP 470

DI 10.1007/BF01114472

PG 22

WC Sociology

SC Sociology

GA GF894

UT WOS:A1991GF89400002

DA 2018-05-03

ER

PT J

AU Chaturvedi, V

Eom, J

Clarke, LE

Shukla, PR

AF Chaturvedi, Vaibhav

Eom, Jiyong

Clarke, Leon E.

Shukla, Priyadarshi R.

TI Long term building energy demand for India: Disaggregating end use energy services in an integrated assessment modeling framework

SO ENERGY POLICY

LA English

DT Article

DE Building energy demand; India; Integrated assessment modeling

ID HOUSEHOLDS

AB With increasing population, income, and urbanization, meeting the energy service demands for the building sector will be a huge challenge for Indian energy policy. Although there is broad consensus that the Indian building sector will grow and evolve over the coming century, there is little understanding of the potential nature of this evolution over the longer term. The present study uses a technologically detailed, service based building energy model nested in the long term, global, integrated assessment framework, GCAM, to produce scenarios of the evolution of the Indian buildings sector up through the

end of the century. The results support the idea that as India evolves toward developed country per-capita income levels, its building sector will largely evolve to resemble those of the currently developed countries (heavy reliance on electricity both for increasing cooling loads and a range of emerging appliance and other plug loads), albeit with unique characteristics based on its climate conditions (cooling dominating heating and even more so with climate change), on fuel preferences that may linger from the present (for example, a preference for gas for cooking), and vestiges of its development path (including remnants of rural poor that use substantial quantities of traditional biomass). (C) 2012 Elsevier Ltd. All rights reserved. C1 [Chaturvedi, Vaibhav; Eom, Jiyong; Clarke, Leon E.] Joint Global Change Res Inst, College Pk, MD 20740 USA.

[Shukla, Priyadarshi R.] Indian Inst Management Ahmedabad, Vastrapur Ahmedabad 380015, Gujarat, India.

RP Chaturvedi, V (reprint author), Joint Global Change Res Inst, 5825 Univ Res Court, Suite 3500, College Pk, MD 20740 USA.

EM vaibhav.chaturvedi@pnl.gov; jiyong.eom@pnl.gov; leon.clarke@pnl.gov;  
shukla@iimand.ernet.in

RI Eom, Jiyong/A-1161-2014

OI Eom, Jiyong/0000-0002-8092-5921

CR Bauen A., 2000, 1 WORLD C BIOM EN IN, P1354

Clarke J. F., 1993, ENERGY EC, V15

Clarke L., 2008, PNNL18075 US DEP EN

Clarke L., 2007, PNNL16735 US DEP EN

Can S. de la Rue du, 2009, RESIDENTIAL TRANSPOR

Reilly J., 1983, ENERGY EC, V5

Edmonds J. A., 1996, PNNLSA27726 US DEP E

Eom J., 2012, ENERGY, V46, P405, DOI 10.1016/j.energy.2012.08.009

GoI (Government of India), 2006, INT EN POL

GOI (Government of India), 2011, LOW CARB STRAT INCL

\*IEA, 2007, EN BAL OECD NONOECD

IEA (International Energy Agency), 2007, WORLD EN OUTL 2007 C

Kowsari R., 2011, ENERGY POLICY

Krey V., 2012, ENERG ECON, V34, pS272, DOI 10.1016/j.eneco.2012.04.013

Kumar S., 2010, TOTAL COMMERCIAL FLO

Maurer EP, 2009, HYDROL EARTH SYST SC, V13, P183, DOI 10.5194/hess-13-183-2009

MGI (McKinsey Global Institute), 2010, INDIAS URBAN AWAKENI

NSSO (National Sample Survey Organisation), 2003, HOUS CONS EXP EMPL U

NSSO, 2005, HOUS CONS EXP EMPL U

NSSO, 2008, HOUS CONS EXP IND

NSSO (National Sample Survey Organisation), 2007, EN SOURC IND HOUS

NSSO (National Sample Survey Organisation), 2002, HOUS CONS EXP EMPL U

NSSO (National Sample Survey Organisation), 2010, HOUS CONS EXP IND

O'Neill BC, 2002, POPUL DEV REV, V28, P53

Odyssee, 2009, DAT EN EFF IND EUR

OECD, 2011, STAT PORT

Permana AS, 2008, ENERG POLICY, V36, P4287, DOI 10.1016/j.enpol.2008.08.005

Poddar T., 2007, 152 GOLDM SACHS

Rehman IH, 2005, ENERG POLICY, V33, P2165, DOI 10.1016/j.enpol.2004.04.014

Saxena N. C., 1997, WOODFUEL SCENARIO PO

Shukla PR, 2007, BALANCING ENERGY DEV

Shukla P. R., 2011, SUSTAINABLE DEV

Shukla PR, 2012, ENERG ECON, V34, pS487, DOI 10.1016/j.eneco.2012.05.002

TERI (The Energy and Resources Institute), 2008, INT REP EN US STUD R

United Nations, 2004, WORLD POP 2300

United Nations, 2007, WORLD URB PROSP 2007

Urban F., 2009, APPL ENERGY, V86

USBED, 2009, US BUILD EN DAT BOOK

van Ruijven BJ, 2011, ENERG POLICY, V39, P7747, DOI 10.1016/j.enpol.2011.09.021

Zhou Y., CLIMATIC CH IN PRESS

TC 25  
 Z9 26  
 U1 1  
 U2 5  
 PU ELSEVIER SCI LTD  
 PI OXFORD  
 PA THE BOULEVARD, LANGFORD LANE, KIDLINGTON, OXFORD OX5 1GB, OXON, ENGLAND  
 SN 0301-4215  
 EI 1873-6777  
 J9 ENERG POLICY  
 JI Energy Policy  
 PD JAN  
 PY 2014  
 VL 64  
 BP 226  
 EP 242  
 DI 10.1016/j.enpol.2012.11.021  
 PG 17  
 WC Economics; Energy & Fuels; Environmental Sciences; Environmental Studies  
 SC Business & Economics; Energy & Fuels; Environmental Sciences & Ecology  
 GA 300VD  
 UT WOS:000330491200025  
 DA 2018-05-03  
 ER

PT J  
 AU Niu, SW  
     Zhang, X  
     Zhao, CS  
     Niu, YZ  
 AF Niu, Shuwen  
     Zhang, Xin  
     Zhao, Chunsheng  
     Niu, Yunzhu

TI Variations in energy consumption and survival status between rural and urban households: A case study of the Western Loess Plateau, China

SO ENERGY POLICY

LA English

DT Article

DE Energy ladder; Energy consumption; Survival status

ID INDOOR AIR-POLLUTION; SOCIOECONOMIC IMPACTS; DEVELOPING-COUNTRIES; FUEL; EMISSIONS; LADDER; TECHNOLOGY; KNOWLEDGE; PROVINCE; ACCESS

AB As energy consumption is closely related to all aspects of human life, it becomes the standard by which to measure people's quality of life and the national development level. Based on the "energy ladder" hypothesis, we conducted questionnaire surveys in the Western Loess Plateau of China, and accessed a considerable amount of information about the energy usage of rural and urban households. The results show that the per capita effective heat is 323.3, 282.8, 250.0 and 123.6 kgce in the provincial capital, medium-sized cities, county towns and rural areas, respectively. The energy ladder feature is obvious. Using 719 sample data, the multiple regression analysis was conducted between per capita effective heat and two independent variables including per capita income and the attributes of energy used, the parameter estimation of the cross-quadratic model produced more significant effects. The three-dimensional graph clearly shows the differences in living standards and survival status between urban and rural households. High-income residents in urban areas consume more high-quality energy, they enjoy an affluent lifestyle. While low-income households in rural areas obtain less effective heat, and use poor quality fuels, they are still at the level of basic survival. (C) 2012 Elsevier Ltd. All rights reserved.

C1 [Niu, Shuwen; Zhang, Xin; Zhao, Chunsheng] Lanzhou Univ, Coll Earth & Environm Sci, Lanzhou 730000, Peoples R China.

- [Niu, Shuwen; Zhang, Xin; Zhao, Chunsheng] Lanzhou Univ, Key Lab Western Chinas Environm Syst, Minist Educ, Lanzhou 730000, Peoples R China.
- [Niu, Yunzhu] Tohoku Univ, Grad Sch Econ, Sendai, Miyagi 9808576, Japan.
- [Niu, Yunzhu] Tohoku Univ, Grad Sch Management, Sendai, Miyagi 9808576, Japan.
- RP Niu, SW (reprint author), Lanzhou Univ, Coll Earth & Environm Sci, Lanzhou 730000, Peoples R China.  
EM shuwenn@lzu.edu.cn
- FU National Natural Science Foundation of China; Ministry of Education of China; Ministry of Science and Technology of China [41171437, 20100211110018, 2008DFA62040]
- FX The authors would like to thank all the members of the project team for their hard work. They are: Dr. Li Guozhu, GuoXiaodong, Ma Libang, Luo Guanghua, Qin Jing, Hu Lili, Master Sun Hongjie, Liu Jianlan, Dong Jianmei, Li Yixin, Ding Yongxia, Yang Lina and Zhang Xifeng. We are also grateful to anonymous reviewers for their valuable suggestions, and National Natural Science Foundation of China, Ministry of Education of China and The Ministry of Science and Technology of China for their financial support during this study (Grant No. 41171437, 20100211110018, 2008DFA62040).
- CR Apergis N, 2011, ENERG ECON, V33, P770, DOI 10.1016/j.eneco.2010.12.018
- Biona JBM, 2008, CLEAN TECHNOL ENVIR, V10, P31, DOI 10.1007/s10098-007-0124-5
- Birol F, 2007, ENERG J, V28, P1
- Cai J, 2008, RENEW SUST ENERG REV, V12, P1667, DOI 10.1016/j.rser.2007.03.002
- Crosby Alfred, 2006, CHILDREN SUN HIST HU
- The editorial board of Atlas of China, 2005, ATL CHIN
- Ekhholm T, 2010, ENERG POLICY, V38, P5696, DOI 10.1016/j.enpol.2010.05.017
- Ezzati M, 2002, ANNU REV ENERG ENV, V27, P233, DOI 10.1146/annurev.energy.27.122001.083440
- Fu C., 1998, LAND REFORM, V2, P122
- Gansu Province Statistics Bureau, 2010, GANS DEV YB
- [??? GUO Xiaodong], 2006, [?????????, China Population 资源 esources and Environment], V16, P98
- Hiemstra-van der Horst G, 2008, ENERG POLICY, V36, P3333, DOI 10.1016/j.enpol.2008.05.006
- HOSIER RH, 1987, RESOUR ENERG, V9, P347, DOI 10.1016/0165-0572(87)90003-X
- Huang BN, 2008, ECOL ECON, V67, P41, DOI 10.1016/j.ecolecon.2007.11.006
- IEA, 2010, WORLD EN OUTL 2010
- IEA (International Energy Agency), 2002, WORLD EN OUTL 2002
- Intergovernmental Panel on Climate Change (IPCC), 2006, GUID NAT GREENH GAS
- Jin Y, 2006, SOC SCI MED, V62, P3161, DOI 10.1016/j.socscimed.2005.11.029
- Joyeux R, 2007, ENERG POLICY, V35, P50, DOI 10.1016/j.enpol.2005.10.012
- Kanagawa M, 2008, ENERG POLICY, V36, P2016, DOI 10.1016/j.enpol.2008.01.041
- Kanagawa M, 2007, ECOL ECON, V62, P319, DOI 10.1016/j.ecolecon.2006.06.005
- Li F, 2011, ENERG POLICY, V39, P568, DOI 10.1016/j.enpol.2010.10.025
- Li GZ, 2009, RENEW ENERG, V34, P1438, DOI 10.1016/j.renene.2008.10.018
- [??? LI Yanmei], 2008, [????, Resources Science], V30, P890
- Ma LW, 2011, ENERGY, V36, P1143, DOI 10.1016/j.energy.2010.11.035
- Mahapatra AK, 1999, BIOMASS BIOENERG, V17, P291, DOI 10.1016/S0961-9534(99)00056-2
- Masera OR, 2000, WORLD DEV, V28, P2083, DOI 10.1016/S0305-750X(00)00076-0
- Ningxia Autonomous Region Statistics Bureau, 2010, NINGX STAT YB
- Niu SW, 2010, ENERGY, V35, P2070, DOI 10.1016/j.energy.2010.01.025
- Pohekar SD, 2005, RENEW SUST ENERG REV, V9, P379, DOI 10.1016/j.rser.2004.05.001
- Poumanyvong P, 2010, ECOL ECON, V70, P434, DOI 10.1016/j.ecolecon.2010.09.029
- REDDY BS, 1995, ENERGY, V20, P929
- Rural Energy Office in Gansu Province, 2011, 12 5 YEAR RUR EN CON
- Sayin C, 2005, ENERG POLICY, V33, P2361, DOI 10.1016/j.enpol.2004.05.005
- Van Ruijven B, 2008, WORLD DEV, V36, P2801, DOI 10.1016/j.worlddev.2008.01.011
- Vennemo H, 2009, RESOUR ENERGY ECON, V31, P139, DOI 10.1016/j.reseneeco.2009.03.003
- Wang Q, 2010, RENEW SUST ENERG REV, V14, P535, DOI 10.1016/j.rser.2009.08.006
- Wei YM, 2007, ENERG POLICY, V35, P247, DOI 10.1016/j.enpol.2005.11.020
- WHO, 2006, FUEL LIF
- [?? ZHANG Lei], 2010, [????, Geographical Research], V29, P13

Zhuang Z, 2009, ENER BUILDINGS, V41, P452, DOI 10.1016/j.enbuild.2008.11.006

Zhuang Z, 2009, ENER BUILDINGS, V41, P111, DOI 10.1016/j.enbuild.2008.07.013

NR 42

TC 25

Z9 29

U1 2

U2 39

PU ELSEVIER SCI LTD

PI OXFORD

PA THE BOULEVARD, LANGFORD LANE, KIDLINGTON, OXFORD OX5 1GB, OXON, ENGLAND

SN 0301-4215

EI 1873-6777

J9 ENER POLICY

J1 Energy Policy

PD OCT

PY 2012

VL 49

BP 515

EP 527

DI 10.1016/j.enpol.2012.06.046

PG 13

WC Economics; Energy & Fuels; Environmental Sciences; Environmental Studies

SC Business & Economics; Energy & Fuels; Environmental Sciences & Ecology

GA 016CC

UT WOS:000309493900057

DA 2018-05-03

ER

PT J

AU Auffhammer, M

Aroonruengsawat, A

AF Auffhammer, Maximilian

Aroonruengsawat, Anin

TI Simulating the impacts of climate change, prices and population on

California's residential electricity consumption

SO CLIMATIC CHANGE

LA English

DT Article

DE Climate change; Adaptation; Impacts estimation; Electricity consumption

ID DEMAND; US; ADAPTATION

AB This study simulates the impacts of higher temperatures resulting from anthropogenic climate change on residential electricity consumption for California. Flexible temperature response functions are estimated by climate zone, which allow for differential effects of days in different temperature bins on households' electricity consumption. The estimation uses a comprehensive household level dataset of electricity bills for California's three investor-owned utilities (Pacific Gas and Electric, San Diego Gas and Electric, and Southern California Edison). The results suggest that the temperature response varies greatly across climate zones. Simulation results using a downscaled version of the National Center for Atmospheric Research global circulation model suggest that holding population constant, total consumption for the households considered may increase by up to 55% by the end of the century. The study further simulates the impacts of higher electricity prices and different scenarios of population growth. Finally, simulations were conducted consistent with higher adoption of cooling equipment in areas which are not yet saturated, as well as gains in efficiency due to aggressive energy efficiency policies.

C1 [Auffhammer, Maximilian] UC Berkeley ARE IAS, Berkeley, CA 94720 USA.

[Aroonruengsawat, Anin] Thammasat Univ, Fac Econ, Bangkok, Thailand.

RP Auffhammer, M (reprint author), UC Berkeley ARE IAS, 207 Giannini Hall, Berkeley, CA 94720 USA.

EM auffhammer@berkeley.edu; anin@econ.tu.ac.th

CR Aroonruengsawat A, 2009, CEC5002009018D PIER

Aroonruengsawat A, 2011, EC CLIMATE CHANGE PA



Auffhammer M, 2011, AM ECON REV, V101, P2687, DOI 10.1257/aer.101.6.2687  
 BAXTER LW, 1992, ENER POLICY, V20, P233, DOI 10.1016/0301-4215(92)90081-C  
 Bureau of Economic Analysis, 2008, REG EC ACC  
 California Energy Commission, 2005, INT EN POL REP  
 Tyree Mary, 2009, CEC5002009014F PIER  
 Cline WR, 1992, EC GLOBAL WARMING  
 Crowley C, 2003, 23 US ASS EN EC N AM  
 Deschenes O, 2011, AM ECON J-APPL ECON, V3, P152, DOI 10.1257/app.3.4.152  
 Energy Information Administration (EIA), 2008, STAT EN DAT SYST  
 Espey J. A., 2004, Journal of Agricultural and Applied Economics, V36, P65  
 Fisher FM, 1962, STUDY ECONOMETRICS D  
 Franco G., 2008, CLIMATIC CHANGE, V87, P139  
 HANEMANN WM, 1984, ECONOMETRICA, V52, P541, DOI 10.2307/1913464  
 Houthakker H.S., 1970, CONSUMER DEMAND US A  
 IPCC, 2000, EM SCEN  
 Mansur ET, 2008, J ENVIRON ECON MANAG, V55, P175, DOI 10.1016/j.jeem.2007.10.001  
 Reiss PC, 2005, REV ECON STUD, V72, P853, DOI 10.1111/0034-6527.00354  
 ROSENTHAL DH, 1995, ENERGY J, V16, P77  
 Sanstad A.H., 2009, CEC5002009013F  
 Schlenker W, 2009, P NATL ACAD SCI USA, V106, P15594, DOI 10.1073/pnas.0906865106  
 NR 22  
 TC 25  
 Z9 25  
 U1 2  
 U2 18  
 PU SPRINGER  
 PI DORDRECHT  
 PA VAN GODEWIJCKSTRAAT 30, 3311 GZ DORDRECHT, NETHERLANDS  
 SN 0165-0009  
 J9 CLIMATIC CHANGE  
 JI Clim. Change  
 PD DEC  
 PY 2011  
 VL 109  
 SU 1  
 SI SI  
 BP 191  
 EP 210  
 DI 10.1007/s10584-011-0299-y  
 PG 20  
 WC Environmental Sciences; Meteorology & Atmospheric Sciences  
 SC Environmental Sciences & Ecology; Meteorology & Atmospheric Sciences  
 GA 871SF  
 UT WOS:000298757300010  
 DA 2018-05-03  
 ER  
  
 PT J  
 AU Linhart, F  
     Scartezzini, JL  
 AF Linhart, Friedrich  
     Scartezzini, Jean-Louis  
 TI Evening office lighting - visual comfort vs. energy efficiency vs.  
     performance?  
 SO BUILDING AND ENVIRONMENT  
 LA English  
 DT Article  
 DE Office lighting; Electric lighting; Lighting power density;

Energy-efficiency; Performance; Comfort  
 ID DAYLIGHT; FREQUENCY; SAVINGS

AB During the study presented in this article, we compared two highly energy-efficient lighting scenarios for evening office lighting (i.e. electric lighting that is typically used for approximately 2 h in the evening). The first of these lighting scenarios (referred to as "Reference"-scenario, Lighting Power Density or LPD of 4.5 W/m<sup>2</sup>) has been successfully in use in many office rooms of the Solar Energy and Building Physics Laboratory's experimental building, located on the campus of the Swiss Federal Institute of Technology in Lausanne, for several years. The second lighting scenario (referred to as "Test"-scenario, Lighting Power Density of 3.9 W/m<sup>2</sup>) is more energy-efficient, creates higher workplane illuminances but leads to an increased risk of discomfort glare. The aim of this study was to meticulously compare the two lighting scenarios in order to find a lighting solution for evening office lighting that offers an optimal trade-off between energy-efficiency, visual comfort and visual performance.

For this purpose, objective visual performance tests (computer-based and paper-based) and subjective visual comfort assessments with 20 human subjects were carried out. The main hypothesis of our study was that the study participants would not perform worse under the more energy-efficient "Test"-scenario than under the "Reference"-scenario (which is extremely well accepted by the building's occupants).

We found that the two tested scenarios are comparable to usual lighting scenarios in other office rooms in terms of subjective visual comfort. The study participants preferred the "Test"-scenario to the "Reference"-scenario. Their performance in a paper-based task was significantly better under the "Test"-scenario than under the "Reference"-scenario. No significant differences in the performance during two computer-based tasks were found. We conclude that energy-efficient lighting with Lighting Power Densities of less than 5 W/m<sup>2</sup> is already achievable in today's office rooms Without jeopardizing visual comfort and performance. Less powerfull electric lighting systems do not necessarily mean a decrease in visual comfort and/or performance: our results even show that better visual comfort and better visual performance can be achieved with less connected lighting power. (C) 2010 Elsevier Ltd. All rights reserved.

C1 [Linhart, Friedrich; Scartezzini, Jean-Louis] Swiss Fed Inst Technol Lausanne EPFL, Solar Energy & Bldg Phys Lab LESO PB, CH-1015 Lausanne, Switzerland.

RP Linhart, F (reprint author), Swiss Fed Inst Technol Lausanne EPFL, Solar Energy & Bldg Phys Lab LESO PB, CH-1015 Lausanne, Switzerland.

EM friedrich.linhart@epfl.ch

CR Akashi Y, 2006, ENER BUILDINGS, V38, P588, DOI 10.1016/j.enbuild.2005.09.005

AKERSTEDT T, 1990, INT J NEUROSCI, V52, P29, DOI 10.3109/00207459008994241

Bach M, 1996, OPTOMETRY VISION SCI, V73, P49, DOI 10.1097/00006324-199601000-00008

\*CIE, 2002, 147 CIE

Courret G., 1999, THESIS SWISS FEDERAL

EKLUND N, J ILLUMINATING ENG S

Franzetti C, 2004, ENER BUILDINGS, V36, P117, DOI 10.1016/j.enbuild.2003.10.005

HINNELLS M, 2008, ENER POLICY, V36, P588

Jenkins D, 2007, APPL ENER, V84, P608, DOI 10.1016/j.apenergy.2007.02.002

Krarti M, 2005, BUILD ENVIRON, V40, P747, DOI 10.1016/j.buildenv.2004.08.007

Li DHW, 2006, ENER CONVERS MANAGE, V47, P1133, DOI 10.1016/j.enconman.2005.06.016

Li DHW, 2003, APPL ENER, V76, P363, DOI 10.1016/S0306-2619(02)00121-6

Linhart Friedrich, 2009, P SPIE, V7423

LINHART F, 2010, THESIS LAUSANNE, DOI DOI 10.5075/EPFL-THESIS-4634

LINHART F, 2008, INT C SOL HEAT COOL, P355

Linhart F, 2010, SOL ENERGY, V84, P1085, DOI 10.1016/j.solener.2010.01.014

Linhart F, 2010, SOL ENERGY, V84, P587, DOI 10.1016/j.solener.2009.05.001

RAMASOOT T, LIGHTING CLASSROOM F

Webb AR, 2006, ENER BUILDINGS, V38, P721, DOI 10.1016/j.enbuild.2006.03.004

WEN Y, 2006, IEEE INT C SENS NETW, V1

Wienold J, 2006, ENER BUILDINGS, V38, P743, DOI 10.1016/j.enbuild.2006.03.017

NR 21

TC 25

Z9 25

U1 0

U2 30

PU PERGAMON-ELSEVIER SCIENCE LTD

PI OXFORD

PA THE BOULEVARD, LANGFORD LANE, KIDLINGTON, OXFORD OX5 1GB, ENGLAND  
SN 0360-1323  
J9 BUILD ENVIRON  
JI Build. Environ.  
PD MAY  
PY 2011  
VL 46  
IS 5  
BP 981  
EP 989  
DI 10.1016/j.buildenv.2010.10.002  
PG 9  
WC Construction & Building Technology; Engineering, Environmental;  
Engineering, Civil  
SC Construction & Building Technology; Engineering  
GA 717TB  
UT WOS:000287069200001  
DA 2018-05-03  
ER

PT J

AU Granderson, J

Piette, MA

Ghatikar, G

AF Granderson, Jessica

Piette, Mary Ann

Ghatikar, Girish

TI Building energy information systems: user case studies

SO ENERGY EFFICIENCY

LA English

DT Article

DE Anomaly detection; Baselineing; Benchmarking; Energy efficiency;  
Diagnostics; Energy analysis; Energy information system; Enterprise  
energy management; Performance monitoring; Web-based energy management  
and control system

AB Measured energy performance data are essential to national efforts to improve building efficiency, as evidenced in recent benchmarking mandates, and in a growing body of work that indicates the value of permanent monitoring and energy information feedback. This paper presents case studies of energy information systems (EIS) at four enterprises and university campuses, focusing on the attained energy savings, and successes and challenges in technology use and integration. EIS are broadly defined as performance monitoring software, data acquisition hardware, and communication systems to store, analyze, and display building energy information. Case investigations showed that the most common energy savings and instances of waste concerned scheduling errors, measurement and verification, and inefficient operations. Data quality is critical to effective EIS use, and is most challenging at the subsystem or component level, and with non-electric energy sources. Sophisticated prediction algorithms may not be well understood but can be applied quite effectively, and sites with custom benchmark models or metrics are more likely to perform analyses external to the EIS. Finally, resources and staffing were identified as a universal challenge, indicating a need to identify additional models of EIS use that extend beyond exclusive in-house use, to analysis services.

C1 [Granderson, Jessica; Piette, Mary Ann; Ghatikar, Girish] Univ Calif Berkeley, Lawrence Berkeley Lab, Berkeley, CA 94720 USA.

RP Granderson, J (reprint author), Univ Calif Berkeley, Lawrence Berkeley Lab, 1 Cyclotron Rd, Berkeley, CA 94720 USA.

EM JGranderson@lbl.gov

FU California Energy Commission; California Institute for Energy and  
Environment [MUC-08-04]; US Government

FX Vendor participation was critical to the success of this study, and the  
authors wish to acknowledge their generosity and willingness to be

included in this work. This work was supported by the California Energy Commission and the California Institute for Energy and Environment under Contract No. MUC-08-04.; This document was prepared as an account of work sponsored by the US Government. While this document is believed to contain correct information, neither the US Government nor any agency thereof, nor The Regents of the University of California, nor any of their employees, makes any warranty, express or implied, or assumes any legal responsibility for the accuracy, completeness, or usefulness of any information, apparatus, product, or process disclosed, or represents that its use would not infringe privately owned rights. Reference herein to any specific commercial product, process, or service by its trade name, trademark, manufacturer, or otherwise, does not necessarily constitute or imply its endorsement, recommendation, or favoring by the US Government or any agency thereof, or The Regents of the University of California. The views and opinions of authors expressed herein do not necessarily state or reflect those of the US Government or any agency thereof or The Regents of the University of California.

CR Brown K, 2006, ACEEE SUMMER STUDY E, V3, P27  
 BROWN K, 2002, AM COUNCIL ENERGY EF, V4, P29  
 \*CA EN COMM, 2002, CAL EN COMM PUBL  
 Capehart B. L., 2005, WEB BASED ENERGY INF  
 Capehart Barney L., 2007, WEB BASED ENTERPRISE  
 Darby S, 2006, EFFECTIVENESS FEEDBA  
 DIAMOND R, 2006, AM COUNCIL ENERGY EF, V3, P41  
 FRIEDMAN H, 2001, LBNL47698  
 GRANDERSON J, 2009, P NAT C BUILD COMM  
 HEINEMEIER K, 1994, LBL36119 UC BERK DEP  
 JOHNSON J, 2002, AM COUNCIL ENERGY EF, V4, P161  
 Mills E., 2005, P NAT C BUILD COMM  
 MILLS E, 2009, LBNL1972E CAL EN COM  
 MOTEGI N, 2003, P INT C ENH BUILD  
 MOTEGI N, 2003, LBNL49977  
 New Buildings Institute, 2008, EN PERF LEED NEW CON  
 New Buildings Institute, 2009, ADV MET EN INF SYST  
 \*NEW BUILD I, 2009, MEAS PERF CAS STUD C  
 Petersen E., 2007, INT J SUSTAINABILITY, V8, P16, DOI DOI 10.1108/14676370710717562  
 Piette MA, 2001, ENERGBUILDINGS, V33, P783, DOI 10.1016/S0378-7788(01)00068-8  
 Piette M. A., 2001, LBNL47699  
 WEBSTER T, 2005, LBNL57772  
 NR 22  
 TC 25  
 Z9 25  
 U1 2  
 U2 24  
 PU SPRINGER  
 PI DORDRECHT  
 PA VAN GODEWIJCKSTRAAT 30, 3311 GZ DORDRECHT, NETHERLANDS  
 SN 1570-646X  
 J9 ENERGBUILDINGS  
 JI Energy Effic.  
 PD FEB  
 PY 2011  
 VL 4  
 IS 1  
 BP 17  
 EP 30  
 DI 10.1007/s12053-010-9084-4  
 PG 14

WC GREEN & SUSTAINABLE SCIENCE & TECHNOLOGY; Energy & Fuels; Environmental Studies

SC Science & Technology - Other Topics; Energy & Fuels; Environmental Sciences & Ecology

GA 796QW

UT WOS:000293067800003

OA gold

DA 2018-05-03

ER

PT J

AU Louw, K

Conradie, B

Howells, M

Dekenah, M

AF Louw, Kate

Conradie, Beatrice

Howells, Mark

Dekenah, Marcus

TI Determinants of electricity demand for newly electrified low-income African households

SO ENERGY POLICY

LA English

DT Editorial Material

DE electrification; determinants; consumption

ID DEVELOPING-COUNTRIES; SOUTH-AFRICA; ENERGY

AB Access to clean, affordable and appropriate energy is an important enabler of development. Energy allows households to meet their most basic subsistence needs; it is a central feature of all the millennium development goals (MDGs) and, while a lack of access to energy may not be a Cause of poverty, addressing the energy needs of the impoverished lets them access set-vices which in turn address the causes of poverty.

While much is known about the factors affecting the decisions made when choosing between fuel types within a household, few quantitative studies have been carried out in South Africa to determine the extent to which these factors affect energy choice decisions, It is assumed that the factors traditionally included in economic demand such as price and income of the household affect choice: tastes and preferences as well as external factors such as distance to fuel Suppliers are expected to influence preferences.

This Study follows two typical low-income rural sites in South Africa, Antioch and Garagapola, where the Electricity Basic Services Support Tariff (EBSST) was piloted in 2002. The EBSST is set at 50 kWh/month per household for low domestic consumers; this is worth approximately R20' (+/- USS3). This subsidy is a lifeline tariff, where households receive the set amount of units per month, free of charge irrespective of whether more units are purchased. These data (collected in 2001 and 2002), recently collated with detailed electricity consumption data, allow us to determine the drivers of electricity consumption within these households. The sample analysed is taken from the initial phase of the study, when no FBE had been introduced to the households. This enabled the Study presented here to make use of the well-populated datasets to assess what affects the electricity use decision in these households.

This paper attempts to assess which factors affected the decision-making process for electricity consumption within these households. A brief history of the electricity industry and the electrification is provided and the theoretical background for the electricity consumption model is provided.

It was found that income, woodfuel usage, iron ownership and credit obtained were significant in determining consumption levels within these households. Price and cross-price elasticities were difficult to assess due to lack of data within the sample. The results have many possible implications for policy, including the effect that easily obtained credit has for low-income households. (C) 2008 Elsevier Ltd. All rights reserved.

C1 [Louw, Kate] Univ Cape Town, Energy Res Ctr, ZA-7701 Rondebosch, South Africa.

[Conradie, Beatrice] Univ Cape Town, Sch Econ, ZA-7700 Rondebosch, South Africa.

[Howells, Mark] IAEA, PESS, A-1400 Vienna, Austria.

[Dekenah, Marcus] Marcus Dekenah Consulting, Centurion, South Africa.

RP Louw, K (reprint author), Univ Cape Town, Energy Res Ctr, Private Bag, ZA-7701 Rondebosch, South Africa.

EM kate.louw@uct.ac.za

OI Howells, Mark/0000-0001-6419-4957

CR Davis M, 1998, ENER POLICY, V26, P207, DOI 10.1016/S0301-4215(97)00100-6

DEKENAH M, 1998, COLLECTION LOAD DATA

\*DEP MIN EN, 2001, SUMM EV REP NAT EL P

\*DEP MIN EN AFF, 1998, WHIT PAP EN

Filippini M, 2004, ENER POLICY, V32, P429, DOI 10.1016/S0301-4215(02)00314-2

Gaunt CT, 2005, ENER POLICY, V33, P1309, DOI 10.1016/j.enpol.2003.12.007

Gaunt C. T., 2003, THESIS U CAPE TOWN C

Gujarati D.N., 2003, BASIC ECONOMETRICS

HALVORSEN R, 1975, REV ECON STAT, V57, P12, DOI 10.2307/1937858

Heltberg R, 2004, ENER ECON, V26, P869, DOI 10.1016/j.eneco.2004.04.018

Holtedahl P, 2004, ENER ECON, V26, P201, DOI 10.1016/j.eneco.2003.11.001

LETHPETERSON S, 2001, AKF MEMO

PRASID G, 2006, ENERGY POLICIES SUST, pCH5

\*U CAP TOWN, 2003, OPT BAS EL SUPP TAR

\*U CAP TOWN, 2002, OPT BAS EL SUPP TARR

Varian H.R., 1992, MICROECONOMIC ANAL

Zarnikau J, 2003, ENER ECON, V25, P603, DOI 10.1016/S0140-9883(03)00043-4

NR 17

TC 25

Z9 25

U1 0

U2 11

PU ELSEVIER SCI LTD

PI OXFORD

PA THE BOULEVARD, LANGFORD LANE, KIDLINGTON, OXFORD OX5 1GB, OXON, ENGLAND

SN 0301-4215

J9 ENER POLICY

JI Energy Policy

PD AUG

PY 2008

VL 36

IS 8

BP 2812

EP 2818

DI 10.1016/j.enpol.2008.02.032

PG 7

WC Economics; Energy & Fuels; Environmental Sciences; Environmental Studies

SC Business & Economics; Energy & Fuels; Environmental Sciences & Ecology

GA 342TI

UT WOS:000258806000006

DA 2018-05-03

ER

PT J

AU Jones, RV

Lomas, KJ

AF Jones, Rory V.

Lomas, Kevin J.

TI Determinants of high electrical energy demand in UK homes:

Socio-economic and dwelling characteristics

SO ENERGY AND BUILDINGS

LA English

DT Article

DE Electricity consumption; Socio-economic factors; Dwelling factors;

Domestic buildings; Odds ratio

ID HOUSEHOLD ELECTRICITY; RESIDENTIAL SECTOR; CONSUMPTION; APPLIANCES;  
BUILDINGS; CLIMATE; MODELS; USAGE

AB This paper provides an analysis of the socio-economic and dwelling factors contributing to high electrical energy demand in UK domestic buildings. The socio-economic, dwelling and electricity consumption data were collected during a large-scale, city-wide survey, carried out in Leicester, UK, in 2009-2010. Annual electrical energy demand was estimated for 315 dwellings and an odds ratio analysis used to identify the socio-economic and dwelling factors that led to high electricity consumption. The effects of a number of socio-economic and dwelling factors which have not previously been studied for the UK domestic sector are included. Thus, for the first time, presence of teenagers, having electric space heating as the primary form of heating, portable electric heating and electric water heating were identified as significant drivers of high electricity demand in UK homes. The employment status and education level of the Household Representative Person, the number of floors in a dwelling, presence of fixed electric heating, and the proportion of low-energy lighting were shown to have no effect on high electricity consumption in UK homes. Given the impetus to reduce electricity consumption and CO<sub>2</sub> emissions from the domestic sector, these observations can help shape energy saving campaigns and future energy policy. (C) 2015 The Authors. Published by Elsevier BM.

C1 [Jones, Rory V.] Univ Plymouth, Sch Architecture Design & Environm, Bldg Performance Anal Grp, Plymouth PL4 8AA, Devon, England.

[Lomas, Kevin J.] Univ Loughborough, Sch Civil & Bldg Engn, Bldg Energy Res Grp, Loughborough LE11 3TU, Leics, England.

RP Jones, RV (reprint author), Univ Plymouth, Sch Architecture Design & Environm, Bldg Performance Anal Grp, Plymouth PL4 8AA, Devon, England.

EM rory.jones@plymouth.ac.uk; K.J.Lomas@lboro.ac.uk

FU Engineering and Physical Sciences Research Council (EPSRC) under Sustainable Urban Environments programme [EP/F007604/1]; eViz project: Energy Visualisation for Carbon Reduction; EPSRC under Transforming Energy Demand in Buildings through Digital Innovation programme [EP/K002465/1]

FX This research was supported in parts by the 4M project: Measurement, Modelling, Mapping and Management: An Evidence-Based Methodology for Understanding and Shrinking the Urban Carbon Footprint, funded by the Engineering and Physical Sciences Research Council (EPSRC) under the Sustainable Urban Environments programme (grant reference EP/F007604/1) and the eViz project: Energy Visualisation for Carbon Reduction, funded by the EPSRC under the Transforming Energy Demand in Buildings through Digital Innovation programme (grant reference EP/K002465/1). For further details, see <http://mmmm.lboro.ac.uk/> and <http://www.eviz.org.uk/>

CR Agresti A., 2007, INTRO CATEGORICAL DA

Baker KJ, 2008, APPL ENERG, V85, P475, DOI 10.1016/j.apenergy.2007.09.004

Bartiaux F., 2005, ECEEE 2005 SUMMER ST, P1313

Bartusch C, 2012, APPL ENERG, V92, P637, DOI 10.1016/j.apenergy.2011.04.034

Bedir M, 2013, ENERG BUILDINGS, V58, P194, DOI 10.1016/j.enbuild.2012.10.016

Blazquez L, 2013, ENERG ECON, V36, P648, DOI 10.1016/j.eneco.2012.11.010

BRE, 2009, GOV STAND ASS PROC E

BRE (Building Research Establishment), 2008, 304702 BRE

Brounen D, 2012, EUR ECON REV, V56, P931, DOI 10.1016/j.eurocorev.2012.02.007

Carlson DR, 2013, ENERG BUILDINGS, V64, P132, DOI 10.1016/j.enbuild.2013.04.005

Carter A, 2012, J POLICY MODEL, V34, P242, DOI 10.1016/j.jpolmod.2011.08.006

Chong H, 2012, EUR ECON REV, V56, P906, DOI 10.1016/j.eurocorev.2012.02.009

CRAMER JC, 1985, ENERGY, V10, P1283, DOI 10.1016/0360-5442(85)90139-2

DCLG (Department for Communities and Local Government), 2009, ENGL HOUS SURV HOUS

Department for Energy and Climate Change (DECO), 2012, UK HOUS EN FACT FIL

Druckman A, 2008, ENERG POLICY, V36, P3177, DOI 10.1016/j.enpol.2008.03.021

EST (Energy Saving Trust), 2011, EN MON, P1

EU (European Union), 2005, OFFICIAL J EUROPEAN

Field A., 2005, DISCOVERING STAT USI

Filippini M, 2004, ENERG POLICY, V32, P429, DOI 10.1016/S0301-4215(02)00314-2

Firth S, 2008, ENER BUILDINGS, V40, P926, DOI 10.1016/j.enbuild.2007.07.005  
Firth SK, 2010, BUILD RES INF, V38, P25, DOI 10.1080/09613210903236706  
Genjo K, 2005, ENER BUILDINGS, V37, P259, DOI 10.1016/j.enbuild.2004.06.025  
Gram-Hanssen K., 2004, BREAKING OUT BOX  
Haas R, 1997, ENER POLICY, V25, P789, DOI 10.1016/S0301-4215(97)00069-4  
Haas R, 1998, ENER POLICY, V26, P1031, DOI 10.1016/S0301-4215(98)00057-3  
Halvorsen B, 2001, ENER POLICY, V29, P227, DOI 10.1016/S0301-4215(00)00106-3  
Hamilton IG, 2013, ENER POLICY, V60, P462, DOI 10.1016/j.enpol.2013.04.004  
Jones RV, 2015, RENEW SUST ENER REV, V43, P901, DOI 10.1016/j.rser.2014.11.084  
Kavousian A, 2013, ENERGY, V55, P184, DOI 10.1016/j.energy.2013.03.086  
Lam JC, 1998, ENER CONVERS MANAGE, V39, P623, DOI 10.1016/S0196-8904(97)10008-5  
Larsen BM, 2004, ENER ECON, V26, P179, DOI 10.1016/j.eneco.2004.02.001  
Leahy E, 2010, ENER POLICY, V38, P4265, DOI 10.1016/j.enpol.2010.03.056  
Lomas K.J., 2010, LOW CARBON CITIES, P168  
Louw K, 2008, ENER POLICY, V36, P2812, DOI 10.1016/j.enpol.2008.02.032  
McLoughlin F, 2012, ENER BUILDINGS, V48, P240, DOI 10.1016/j.enbuild.2012.01.037  
MUNLEY VG, 1990, SOUTHERN ECON J, V57, P178, DOI 10.2307/1060488  
Ndiaye D, 2011, ENER BUILDINGS, V43, P446, DOI 10.1016/j.enbuild.2010.10.008  
NIELSEN L, 1993, ENER POLICY, V21, P1133, DOI 10.1016/0301-4215(93)90263-F  
Office for National Statistics (ONS), 2010, RES 2001 CENS  
Panapakidis IP, 2014, ENER BUILDINGS, V73, P137, DOI 10.1016/j.enbuild.2014.01.002  
Papachristos G, 2015, ENER BUILDINGS, V86, P403, DOI 10.1016/j.enbuild.2014.09.077  
Parker DS, 2003, ENER BUILDINGS, V35, P863, DOI 10.1016/S0378-7788(02)00244-X  
PARTI M, 1980, BELL J ECON, V11, P309, DOI 10.2307/3003415  
Sanquist T.F., 2012, ENER POLICY, V42, P240  
Santamouris M, 2007, ENER BUILDINGS, V39, P893, DOI 10.1016/j.enbuild.2006.11.001  
Summerfield AJ, 2007, ENER BUILDINGS, V39, P783, DOI 10.1016/j.enbuild.2007.02.012  
Summerfield AJ, 2010, BUILD RES INF, V38, P42, DOI 10.1080/09613210903262512  
Szumilas M, 2010, J CAN ACAD CHILD ADO, V19, P227  
Tiwari P, 2000, J POLICY MODEL, V22, P81, DOI 10.1016/S0161-8938(98)00003-9  
Tso GKF, 2007, ENERGY, V32, P1761, DOI 10.1016/j.energy.2006.11.010  
Tso GKF, 2003, ENERGY, V28, P1671, DOI 10.1016/S0360-5442(03)00153-1  
Wiesmann D, 2011, ENER POLICY, V39, P2772, DOI 10.1016/j.enpol.2011.02.047  
Wyatt P, 2013, ENER POLICY, V60, P540, DOI 10.1016/j.enpol.2013.05.037  
Yohanis YG, 2008, ENER BUILDINGS, V40, P1053, DOI 10.1016/j.enbuild.2007.09.001  
Yu Z, 2011, ENER BUILDINGS, V43, P1409, DOI 10.1016/j.enbuild.2011.02.002  
Yu Z, 2010, ENER BUILDINGS, V42, P1637, DOI 10.1016/j.enbuild.2010.04.006  
Yu Z, 2012, ENER BUILDINGS, V47, P430, DOI 10.1016/j.enbuild.2011.12.018  
Zhou SJ, 2013, ENER POLICY, V61, P394, DOI 10.1016/j.enpol.2013.06.092  
Zimmermann J.P., 2012, R66141 INT

NR 60

TC 24

Z9 24

U1 7

U2 20

PU ELSEVIER SCIENCE SA

PI LAUSANNE

PA PO BOX 564, 1001 LAUSANNE, SWITZERLAND

SN 0378-7788

EI 1872-6178

J9 ENER BUILDINGS

J1 Energy Build.

PD AUG 15

PY 2015

VL 101

BP 24

EP 34

DI 10.1016/j.enbuild.2015.04.052



PG 11

WC Construction & Building Technology; Energy & Fuels; Engineering, Civil

SC Construction & Building Technology; Energy & Fuels; Engineering

GA CL8QB

UT WOS:000357238100003

OA gold

DA 2018-05-03

ER

PT J

AU Gago, EJ

Muneer, T

Knez, M

Koster, H

AF Gago, E. J.

Muneer, T.

Knez, M.

Koester, H.

TI Natural light controls and guides in buildings. Energy saving for electrical lighting, reduction of cooling load

SO RENEWABLE & SUSTAINABLE ENERGY REVIEWS

LA English

DT Review

DE Sustainable building; Healthy buildings; Environmental impact of daylight and control systems of daylighting

ID HOLOGRAPHIC OPTICAL-ELEMENTS; AUTOMATED VENETIAN BLIND; HIGHLY LUMINOUS CLIMATES; LOUVER SHADING DEVICES; PASSIVE SOLAR DESIGN; CONTROL STRATEGIES; OFFICE BUILDINGS; VISUAL COMFORT; SKY CONDITIONS; CONTROL-SYSTEM

AB The residential sector is responsible for approximately a quarter of energy consumption in Europe. This consumption, together with that of other buildings, mainly from the tertiary sector, makes up 40% of total energy consumption and 36% of CO<sub>2</sub> emissions. Artificial lighting makes up 14% of electrical consumption in the European Union and 19% worldwide. Through the use of well-designed natural lighting, controlled by technologies or systems which guarantee accessibility from all areas inside buildings, energy consumption for lighting and air conditioning can be kept to a minimum. The authors of this article carried out a state of the art on the technologies or control systems of natural light in buildings, concentrating on those control methods which not only protect the occupants from direct solar glare but also maximize natural light penetration in buildings based on the occupants' preferences, whilst allowing for a reduction in electrical consumption for lighting and cooling. All of the control and/or natural light guidance systems and/or strategies guarantee the penetration of daylight into the building, thus reducing the electrical energy consumption for lighting and cooling. At the same time they improve the thermal and visual comfort of the users of the buildings. However various studies have also brought to light certain disadvantages to these systems. (C) 2014 Elsevier Ltd. All rights reserved.

C1 [Gago, E. J.] Univ Granada, Sch Civil Engrn, Granada, Spain.

[Muneer, T.] Edinburgh Napier Univ, Sch Engrn & Built Environm, Edinburgh, Midlothian, Scotland.

[Knez, M.] Univ Maribor, Fac Logist, SLO-2000 Maribor, Slovenia.

[Koester, H.] Koster Lichtplanung, D-60437 Frankfurt, Germany.

RP Gago, EJ (reprint author), Univ Granada, Sch Civil Engrn, Granada, Spain.

EM ejadraque@gr.es

CR Acosta I, 2013, ENER G BUILDINGS, V60, P232, DOI 10.1016/j.enbuild.2013.01.006

Al-Sallal KA, 2007, RENEW ENER, V32, P1033, DOI 10.1016/j.renene.2006.08.010

Aleo F., 1994, P EUR C EN PERF IND, P1074

Alrubaih MS, 2013, RENEW SUST ENER REV, V21, P494, DOI 10.1016/j.rser.2012.12.057

Andersen M, 2005, SOL ENERGY, V78, P187, DOI 10.1016/j.solener.2004.06.005

Aries MBC, 2008, ENER G POLICY, V36, P1858, DOI 10.1016/j.enpol.2007.05.021

Athienitis AK, 2002, SOL ENERGY, V72, P271, DOI 10.1016/S0038-092X(02)00016-6

Blok K, 2005, ENER G POLICY, V33, P1635, DOI 10.1016/j.enpol.2004.02.006

Boyce P., 2003, BENEFITS DAYLIGHT WI

- Breitenbach J, 2000, SOL ENERGY, V68, P427, DOI 10.1016/S0038-092X(00)00011-6  
[Anonymous], 8206 BS 2
- Campbell N. S., 1997, P 5 IBPSA C PRAG CZE, P173
- Canziani R, 2004, ENER G BUILDINGS, V36, P1163, DOI 10.1016/j.enbuild.2004.05.001
- Chaiwiwatworakul P, 2009, ENER G CONVERS MANAGE, V50, P2927, DOI 10.1016/j.enconman.2009.07.008
- Chan YC, 2013, SOL ENERGY, V98, P241, DOI 10.1016/j.solener.2013.10.005
- Chel A, 2009, APPL ENER G, V86, P2507, DOI 10.1016/j.apenergy.2009.03.004
- Chen YY, 2014, ENER G BUILDINGS, V73, P184, DOI 10.1016/j.enbuild.2014.01.030
- Chirattananon S, 2000, SOL ENERGY, V69, P331, DOI 10.1016/S0038-092X(00)00081-5
- Chirattananon S, 2002, RENEW ENER G, V26, P69, DOI 10.1016/S0960-1481(01)00099-4
- Choi JH, 2012, BUILD ENVIRON, V50, P65, DOI 10.1016/j.buildenv.2011.10.010
- Christoffers D, 1996, SOL ENERGY, V57, P339, DOI 10.1016/S0038-092X(96)00112-0
- Cowrret G, 1998, ENER G BUILD, V28, P79
- CRITTEN DL, 1988, SOL ENERGY, V41, P583, DOI 10.1016/0038-092X(88)90061-8
- Daniels K, 1977, TECHNIK BAU, V3, P291
- Darula S, 2013, OPTIK, V124, P3165, DOI 10.1016/j.jileo.2012.09.052
- Datta G, 2001, RENEW ENER G, V23, P497, DOI 10.1016/S0960-1481(00)00131-2
- DiBartolomeo DL, 1997, J ILLUM ENG SOC, V26, P146, DOI 10.1080/00994480.1997.10748175  
\*DIN, 5034 DIN
- EDMONDS IR, 1993, SOL ENER G MAT SOL C, V29, P1, DOI 10.1016/0927-0248(93)90088-K
- Edmonds IR, 2002, SOL ENERGY, V73, P111, DOI 10.1016/S0038-092X(02)00039-7
- Edmonds IR, 1995, LIGHTING RES TECHNOL, V27, P27
- European Commission, COMM COMM EN EFF DEL
- European Commission & Directorate-General for Energy and Transport, 2010, EU EN TRANSP FIG ENER G YEARLY STATISTICS, 2008, EN YEARL STAT 2008
- Franzetti C, 2004, ENER G BUILDINGS, V36, P117, DOI 10.1016/j.enbuild.2003.10.005
- Freewan AA, 2008, SOL ENERGY, V82, P343, DOI 10.1016/j.solener.2007.08.003
- Freewan AA, 2010, ENER G CONVERS MANAGE, V51, P1600, DOI 10.1016/j.enconman.2009.09.037
- Galasiu AD, 2004, SOL ENERGY, V76, P523, DOI 10.1016/j.solener.2003.12.007
- Garcia-Hansen V, 2002, RENEW ENER G, V26, P91, DOI 10.1016/S0960-1481(01)00089-1
- Ghiaus C, HDB INTELLIGENT BUIL, P26
- Gorgulu S, 2013, ENER G BUILDINGS, V61, P172, DOI 10.1016/j.enbuild.2013.02.037
- Greenup P, 2001, RENEW ENER G, V22, P45, DOI 10.1016/S0960-1481(00)00027-6
- Greenup PJ, 2004, SOL ENERGY, V76, P99, DOI 10.1016/j.solener.2003.08.018
- Guillemin A, 2001, ENER G BUILDINGS, V33, P477, DOI 10.1016/S0378-7788(00)00100-6
- Hammad F, 2010, ENER G BUILDINGS, V42, P1888, DOI 10.1016/j.enbuild.2010.05.024
- Henriques GC, 2012, AUTOMAT CONSTR, V28, P91, DOI 10.1016/j.autcon.2012.06.002
- Heras MR, 2005, SOL ENERGY, V78, P85, DOI 10.1016/j.solener.2004.05.019
- Heschong L, 2002, ASHRAE J, V44, P65
- Hopkinson RG, 1966, DAYLIGHTING
- Hourani MM, 2012, RENEW SUST ENER G REV, V16, P3579, DOI 10.1016/j.rser.2012.02.074
- Hraska J., 2011, INGINERIA ILUMINATUL, V13, P5
- Hraska J., 2014, RENEW ENER G, p[xxx, 1]
- Huber A, 2010, DEV IMPLEMENTING EFF
- Hviid CA, 2008, SOL ENERGY, V82, P787, DOI 10.1016/j.solener.2008.03.001
- Illuminating Engineering Society of North America (IESNA), 1999, RP599 IESNA
- Ihm P, 2009, BUILD ENVIRON, V44, P509, DOI 10.1016/j.buildenv.2008.04.016
- Inoue T, 1998, ASHRAE T, V104, P1034
- James PAB, 2005, SOL ENERGY, V78, P441, DOI 10.1016/j.solener.2004.05.022
- Janssen R., 2004, ENER G EFFICIENT BUI
- Jenkins D, 2003, BUILD ENVIRON, V38, P965, DOI 10.1016/S0360-1323(03)00061-1
- Jenkins D, 2005, ENER G CONVERS MANAGE, V46, P2288, DOI 10.1016/j.enconman.2004.10.018
- Jenkins D, 2005, ENER G BUILDINGS, V37, P485, DOI 10.1016/j.enbuild.2004.09.014
- Jenkins D, 2004, APPL ENER G, V79, P77, DOI 10.1016/j.apenergy.2003.11.003
- Al-Obaidi Karam M, 2014, FRONT ARCHIT RES, V3, P178
- Khan KS, 2003, SYSTEMATIC REV SUPPO
- Kim JT, 2010, BUILD ENVIRON, V45, P256, DOI 10.1016/j.buildenv.2009.08.024

- Kim J., 2007, P CLIM 2007 WELLBEIN, P1678
- Kim JH, 2009, BUILD ENVIRON, V44, P1517, DOI 10.1016/j.buildenv.2008.08.006
- Klammt S, 2009, P PLDC TU DORTM BERL
- Klems JH, 1997, ASHRAE TRAN, V103, P1026
- Klems JH, 1995, ASHRAE TRAN, V101, P791
- Kocifaj M, 2012, SOL ENERGY, V86, P2753, DOI 10.1016/j.solener.2012.06.017
- Koo SY, 2010, BUILD ENVIRON, V45, P1508, DOI 10.1016/j.buildenv.2009.12.014
- Koster H, 2013, SUSTAIN BUILT ENV, V1, P112
- Kotey N. A., 2006, P 31 C SOL EN SOC CA
- Kristl Z, 2008, RENEW ENER, V33, P694, DOI 10.1016/j.renene.2007.03.020
- Kruger EL, 2011, J RENEW SUSTAIN ENER, V3, DOI 10.1063/1.3670407
- Kuhn E, 2006, ENERGY BUILD, V38, P648
- Kuhn T. E., 2001, SOL ENERGY, V69, P59
- Kurata K., 1991, SOL ENERGY, V46, P55
- Lancashire DS, 1996, LIGHTING WAY BUILDIN, P34
- Laouadi A, 2013, HVAC&R RES, V19, P63, DOI 10.1080/10789669.2012.736812
- Lee E, 1998, ENER BUILDINGS, V29, P47, DOI 10.1016/S0378-7788(98)00035-8
- Lee ES, 1995, ASHRAE TRAN, V101, P326
- Leung TCY, 2013, SOL ENERGY, V94, P253, DOI 10.1016/j.solener.2013.05.004
- Li DHW, 2006, ENER CONVERS MANAGE, V47, P1133, DOI 10.1016/j.enconman.2005.06.016
- Li DHW, 2001, ENER BUILDINGS, V33, P793, DOI 10.1016/S0378-7788(01)00067-6
- Linhart F, 2010, SOL ENERGY, V84, P1085, DOI 10.1016/j.solener.2010.01.014
- Linhart F, 2010, SOL ENERGY, V84, P587, DOI 10.1016/j.solener.2009.05.001
- Lorenz W, 2001, SOL ENERGY, V70, P109, DOI 10.1016/S0038-092X(00)00132-8
- Meijer F, 2009, BUILD RES INF, V37, P533, DOI 10.1080/09613210903189376
- MULLER HFO, 1994, RENEW ENER, V5, P935, DOI 10.1016/0960-1481(94)90114-7
- Ochoa CE, 2006, BUILD ENVIRON, V41, P1128, DOI 10.1016/j.buildenv.2005.05.001
- Oh MH, 2012, ENER BUILDINGS, V55, P728, DOI 10.1016/j.enbuild.2012.09.019
- Palmero-Marrero AI, 2010, APPL ENER, V87, P2040, DOI 10.1016/j.apenergy.2009.11.020
- Park KW, 2003, SOL ENERGY, V75, P277, DOI 10.1016/j.solener.2003.08.013
- Parmelee G.V., 1952, ASHVE T, V58, P377
- Perez-Lombard L, 2008, ENER BUILDINGS, V40, P394, DOI 10.1016/j.enbuild.2007.03.007
- Pfrommer P, 1996, SOL ENERGY, V57, P77, DOI 10.1016/S0038-092X(96)00063-1
- Pullin AS, 2006, CONSERV BIOL, V20, P1647, DOI 10.1111/j.1523-1739.2006.00485.x
- Reinhart CF, 2001, ENER BUILDINGS, V33, P683, DOI 10.1016/S0378-7788(01)00058-5
- Roche L., 2002, Lighting Research & Technology, V34, P11, DOI 10.1191/1365782802li026oa
- Roisin B, 2008, ENER BUILDINGS, V40, P514, DOI 10.1016/j.enbuild.2007.04.006
- Rosenfeld JLJ, 2000, SOL ENERGY S, V69, pS1
- Ruck N, DAYLIGHT BUILDINGS S
- Saelens D, 2013, ENER BUILDINGS, V60, P286, DOI 10.1016/j.enbuild.2012.10.056
- Sanati L, 2013, BUILD ENVIRON, V64, P67, DOI 10.1016/j.buildenv.2013.02.013
- Scartezzini JL, 2002, SOL ENERGY, V73, P123, DOI 10.1016/S0038-092X(02)00040-3
- Selkowitz S, 1998, DAYL 98 C P ONT CAN
- Selkowitz S, 2004, INT S DAYL BUILD IEA
- Shao L, 1998, LIGHTING RES TECHNOL, V30, P1
- Shehabi A, 2013, ENER BUILDINGS, V66, P415, DOI 10.1016/j.enbuild.2013.07.013
- Shen E, 2014, BUILD ENVIRON, V78, P155, DOI 10.1016/j.buildenv.2014.04.028
- Simmler H, 2008, BUILD ENVIRON, V43, P197, DOI 10.1016/j.buildenv.2006.10.011
- Soler A, 1997, BUILD ENVIRON, V32, P87, DOI 10.1016/S0360-1323(96)00047-9
- Soler A, 1996, RENEW ENER, V8, P198, DOI 10.1016/0960-1481(96)88845-8
- THOLL HD, 1994, P SOC PHOTO-OPT INS, V2255, P486, DOI 10.1117/12.185391
- TREADO S, 1984, ENER BUILDINGS, V6, P319, DOI 10.1016/0378-7788(84)90015-X
- Tsangrassoulis A, 2000, ENER BUILDINGS, V32, P41, DOI 10.1016/S0378-7788(99)00039-0
- Tsangrassoulis A, 2003, RENEW ENER, V28, P2157, DOI 10.1016/S0960-1481(03)00078-8
- Tzempelikos A., 2003, P 3 ISES WORLD C GOT
- Tzempelikos A, 2007, SOL ENERGY, V81, P369, DOI 10.1016/j.solener.2006.06.015
- Tzempelikos A, 2008, SOL ENERGY, V82, P1172, DOI 10.1016/j.solener.2008.05.014
- ul Haq MA, 2014, RENEW SUST ENER REV, V33, P268, DOI 10.1016/j.rser.2014.01.090

Vazquez-Molini D, 2013, ENER G BUILDINGS, V67, P525, DOI 10.1016/j.enbuild.2013.08.040  
Vine E, 1998, ENER G BUILDINGS, V28, P205, DOI 10.1016/S0378-7788(98)00023-1  
Wagner D., 2004, HOLOGRAPHIC OPTICAL  
Webb AR, 2006, ENER G BUILDINGS, V38, P721, DOI 10.1016/j.enbuild.2006.03.004  
Wittkopf SK, 2007, SOL ENERGY, V81, P151, DOI 10.1016/j.solener.2006.04.002  
Wittkopf SK, 2006, ENER G BUILDINGS, V38, P1120, DOI 10.1016/j.enbuild.2006.01.005  
Wong I, 2012, APPL ENER G, V90, P225, DOI 10.1016/j.apenergy.2011.03.018  
Xue P, 2014, BUILD ENVIRON, V81, P51, DOI 10.1016/j.buildenv.2014.06.011  
YAHODA DS, 2004, ASHRAE T, V110, P463  
Zain-Ahmed A, 2002, ENER G CONVERS MANAGE, V43, P1725, DOI 10.1016/S0196-8904(01)00007-3

NR 134  
TC 24  
Z9 24  
U1 6  
U2 61  
PU PERGAMON-ELSEVIER SCIENCE LTD  
PI OXFORD  
PA THE BOULEVARD, LANGFORD LANE, KIDLINGTON, OXFORD OX5 1GB, ENGLAND  
SN 1364-0321  
J9 RENEW SUST ENER G REV  
JI Renew. Sust. Energ. Rev.  
PD JAN  
PY 2015  
VL 41  
BP 1  
EP 13  
DI 10.1016/j.rser.2014.08.002  
PG 13  
WC GREEN & SUSTAINABLE SCIENCE & TECHNOLOGY; Energy & Fuels  
SC Science & Technology - Other Topics; Energy & Fuels  
GA AX0DA  
UT WOS:000346622400001  
DA 2018-05-03  
ER

PT J  
AU Keyvanfar, A  
Shafaghat, A  
Abd Majid, MZ  
Bin Lamit, H  
Hussin, MW  
Ali, KNB  
Saad, AD  
AF Keyvanfar, Ali  
Shafaghat, Arezou  
Abd Majid, Muhd Zaimi  
Bin Lamit, Hasanuddin  
Hussin, Mohd Warid  
Ali, Kherun Nita Binti  
Saad, Alshahri Dhafer

TI User satisfaction adaptive behaviors for assessing energy efficient  
building indoor cooling and lighting environment  
SO RENEWABLE & SUSTAINABLE ENERGY REVIEWS  
LA English  
DT Review  
DE Energy efficient building; User satisfaction; Adaptive behavior; Energy  
efficient indoor environment; Building assessment; Energy Behavior;  
Thermal comfort

ID MIXED-MODE BUILDINGS; THERMAL COMFORT; OFFICE BUILDINGS; DISCOMFORT  
GLARE; SUSTAINABLE BUILDINGS; SYSTEMATIC REVIEWS; ASSESSMENT TOOLS;  
VISUAL COMFORT; OCCUPANTS; PERFORMANCE

AB Many techniques for managing sustainability including sustainable building assessment tools and standards have been developed globally. The sustainable building assessment tools measure the user satisfaction dependent to environmental and economic aspects of energy efficient building practices. However, these tools have not yet measure energy efficiency index by involving user satisfaction from adaptive behaviors dependently, which can determine the actual energy consumption versus the planed energy consumption of the building. Hence, this research aimed at providing a comprehensive list of adaptive behaviors for assessing energy efficient building indoor environment in design phase of building lifecycle. The study focused on identifying and establishing adaptive behaviors that are in response to indoor conditions provided by Cooling and Lighting systems in energy efficient office buildings. This research involves adaptations across Technological and Personal. The research was conducted in two phases. Phase one identified the list of user satisfaction adaptive behaviors through a systematic approach. Next, an expert input study was conducted to validate the findings of the literature review. Expert input data was collected using Delphi structured close group discussion method, and then analyzed through Grounded Group Decision Making (GGDM) method. Eight experts were involved in four sessions of the GGDM application procedure. The research established 18 adaptive behaviors relevant to cooling system in energy efficient indoor environments, and 18 adaptive behaviors relevant to the lighting system. The comprehensive list of user satisfaction adaptive behaviors can be applied in both current and future sustainable building assessment tools' energy efficiency indexes. This aids architects, engineers, facility managers, building owners, consultants, authorities, contractors, and academic researchers in accreditation of building users, building design and reduction of building's energy consumption. (C) 2014 Elsevier Ltd. All rights reserved.

C1 [Keyvanfar, Ali; Abd Majid, Muhd Zaimi] Univ Teknol Malaysia, Construct Res Alliance, Construct Res Ctr, Skudai 81310, Johor, Malaysia.  
[Shafaghat, Arezou] Univ Teknol Malaysia, Sustainabil Res Alliance SUTRA, Skudai 81310, Johor, Malaysia.  
[Bin Lamit, Hasanuddin] Univ Teknol Malaysia, Fac Built Environm, Ctr Built Environm Malays World KALAM, Skudai 81310, Johor, Malaysia.  
[Hussin, Mohd Warid] Univ Teknol Malaysia, Fac Civil Engn, Construct Res Ctr, Skudai 81310, Johor, Malaysia.  
[Ali, Kherun Nita Binti] Univ Teknol Malaysia, Fac Built Environm, Dept Quant Survey, Skudai 81310, Johor, Malaysia.  
[Saad, Alshahri Dhafer] Jeddah Tech Coll, Tech & Vocat Training Corp, Jeddah, Mekkah, Saudi Arabia.  
RP Abd Majid, MZ (reprint author), Univ Teknol Malaysia, Construct Res Alliance, Construct Res Ctr, Skudai 81310, Johor, Malaysia.

EM alikkeyvanfar@gmail.com; arezou.shafaghat@gmail.com; mzaimi@utm.my;  
b-hasanuddin@utm.m; warid@utm.my; b-kherun@utm.my; civil747@gmail.com

RI Abd. Majid, Muhd Zaimi/J-1436-2012; Keyvanfar, Ali/B-8041-2016;  
Shafaghat, Arezou/B-8011-2016

OI Abd. Majid, Muhd Zaimi/0000-0001-9207-1508; Keyvanfar,  
Ali/0000-0003-0059-274X; Shafaghat, Arezou/0000-0002-6439-936X

FU Malaysian Ministry of Science, Technology, and Innovation (MOSTI)  
[4S055, 4S042]; Research Management Center, KALAM, Sustainability  
Research Alliance (SUTRA); Institute Sultan Iskandar at Universiti  
Teknologi Malaysia

FX The authors would like to thank the Malaysian Ministry of Science,  
Technology, and Innovation (MOSTI) for funding this research projects  
with grant vote numbers 4S055 and 4S042. Also, the authors appreciate  
these organizations for their supports and contributions, Research  
Management Center, KALAM, Sustainability Research Alliance (SUTRA), and  
Institute Sultan Iskandar at Universiti Teknologi Malaysia.

CR Abbaszadeh S, 2013, OCCUPANT SATISFACTIO  
Abbaszadeh S., 2006, OCCUPANT SATISFACTIO  
Abdalla G, 2006, P 2 INT C ENV SCI TE, P6  
Achterkamp Marjolein C, 2008, International Journal of Project Management, V26, P749, DOI  
10.1016/j.ijproman.2007.10.001

- Akbas R., 2007, ASCE P INT WORKSH CO
- Allsop DT, 2007, J ADVERTISING RES, V47, P398, DOI 10.2501/S0021849907070419
- American Society of Heating Refrigerating and Air-Conditioning Engineers-ASHRAE, 2010, 552010 ANSIASHRAE
- Andersen RV, 2013, ENER G BUILDINGS, V41, P11
- Aries MBC, 2010, J ENVIRON PSYCHOL, V30, P533, DOI 10.1016/j.jenvp.2009.12.004
- Azar E, 2012, J COMPUT CIVIL ENG, V26, P506, DOI 10.1061/(ASCE)CP.1943-5487.0000158
- Baker N, 1996, ENER G BUILDINGS, V23, P175, DOI 10.1016/0378-7788(95)00942-6
- Building and Construction Authority-BCA, 2005, SING GREEN MARK SCHE
- Benton CC, 1994, UNSET BUILDING FINAL
- Borgeson S, 2011, BUILD RES INF, V39, P118, DOI 10.1080/09613218.2011.556345
- Bourgeois D, 2006, ENER G BUILDINGS, V38, P814, DOI 10.1016/j.enbuild.2006.03.002
- Boyce PR, 2003, HUMAN FACTORS LIGHTI
- Brager G, 2009, BUILD RES INF, V37, P369, DOI 10.1080/09613210902899785
- Brager GS, 1998, ENER G BUILDINGS, V27, P83, DOI 10.1016/S0378-7788(97)00053-4
- Brager G. S., 2004, ASHRAE T, P110
- Hong Kong: Business Environment Council, 1996, HONG KONG BUILD ENV
- Campbell A., 1975, QUALITY AM LIFE
- Candido C, 2011, BUILD RES INF, V39, P145, DOI 10.1080/09613218.2011.557858
- Cena K, 2001, J THERM BIOL, V26, P409, DOI 10.1016/S0306-4565(01)00052-3
- Chen Z, 2006, ENER G BUILDINGS, V38, P393, DOI 10.1016/j.enbuild.2005.08.001
- Christensen P., 2011, ASSESSING ASSESSMENT
- Chung W, 2011, APPL ENER G, V88, P1470, DOI 10.1016/j.apenergy.2010.11.022
- CLARK KB, 1985, RES POLICY, V14, P235, DOI 10.1016/0048-7333(85)90007-1
- Cole RJ, 2010, BUILD RES INF, V38, P339, DOI 10.1080/09613211003747071
- Collins KJ, 1979, P 1 INT IND CLIM S, P819
- Cook DJ, 1997, ANN INTERN MED, V127, P210, DOI 10.7326/0003-4819-127-3-199708010-00006
- Cook DJ, 1997, ANN INTERN MED, V126, P376, DOI 10.7326/0003-4819-126-5-199703010-00006
- Crawley D, 1999, BUILD RES INF, V27, P300, DOI 10.1080/096132199369417
- Cuttle C., 1983, P PEOPL PHYS ENV RES, P203
- Danny HWL, 2010, APPL ENER G, V87, P558
- Darby S, 2006, EFFECTIVENESS FEEDBA
- Darby S, 2000, P 2 ANN INT C EN EFF
- de Dear R., 2007, P 6 INT C IND AIR QU
- Dear de RJ, 1998, ASHRAE T, V104, P145
- Degelman LO, 2005, P BUILD SIMUL, P692
- Dibra A., 2011, ADV APPL SCI RES, V2, P48
- Eang L. S., 2001, ENERGY EFFICIENCY OF
- Edwards B, 2006, SUSTAIN DEV, V14, P190, DOI 10.1002/sd.263
- [Anonymous], 2007, 15251 EN EUR COMM ST
- Estes JM, 2004, P 14 S IMPR BUILD SY, P259
- Fabi V, 2012, BUILD ENVIRON, V58, P188, DOI 10.1016/j.buildenv.2012.07.009
- Fanger PO, 2002, ENER G BUILDINGS, V34, P533
- Fischer C, 2007, P 2007 ECEEE SUMM ST
- Fisher S., 1990, ENV CHANGE CONTROL V
- Folk GE, 1981, BIOENGINEERING THERM, P157
- Fountain M, 1996, ENER G BUILDINGS, V24, P179, DOI 10.1016/S0378-7788(96)00988-7
- Froehlich J, 2009, P HCIC 2009 WORKSH R, P9
- Green Building Challenges (GBC), 2001, IEA ANN 31 CLASS SYS
- Geller ES, 1982, PRESERVING ENV NEW S
- Gibson C, 2011, T I BRIT GEOGR, V36, P3, DOI 10.1111/j.1475-5661.2010.00403.x
- Goldsmith R, 1974, P 20 E SCH AGR SCI
- Goto T, 2007, BUILD ENVIRON, V42, P3944, DOI 10.1016/j.buildenv.2006.06.026
- Green KC, 2007, FORESIGHT INT J APPL, V8, P17
- Haapio A, 2008, ENVIRON IMPACT ASSES, V28, P469, DOI 10.1016/j.eiar.2008.01.002
- Haldi F, 2008, BUILD ENVIRON, V43, P2163, DOI 10.1016/j.buildenv.2008.01.003
- Han S., 2005, J LIGHT VIS ENV, V29, P25
- Harrison-Walker L. J., 2001, J SERV RES-US, V4, P60, DOI DOI 10.1177/109467050141006

- Heidari S, 2002, ENER G BUILDINGS, V34, P607, DOI 10.1016/S0378-7788(02)00011-7
- Herkel S, 2005, P 9 INT IBPSA C BUIL
- Herkel S, 2008, BUILD ENVIRON, V43, P588, DOI 10.1016/j.buildenv.2006.06.031
- Hilbert M, 2009, TECHNOL FORECAST SOC, V76, P880, DOI 10.1016/j.techfore.2009.01.001
- Hirning MB, 2013, BUILD ENVIRON, V59, P349, DOI 10.1016/j.buildenv.2012.08.032
- Hoes P, 2009, ENER G BUILDINGS, V41, P295, DOI 10.1016/j.enbuild.2008.09.008
- Holopainen R., 2012, THESIS AALTO U
- Holopainen R, 2014, BUILD ENVIRON, V71, P60, DOI 10.1016/j.buildenv.2013.09.009
- Huizenga C, 2006, P HLTH BUILDINGS, VIII, P393
- Humphreys Micheal A., 1998, ASHRAE T, V104, P991
- Hwang T, 2011, INDOOR BUILT ENVIRON, V20, P75, DOI 10.1177/1420326X10392017
- IESNA, 2000, LIGHT HDB
- Indraganti M, 2014, BUILD ENVIRON, V74, P39, DOI 10.1016/j.buildenv.2014.01.002
- Inkarojrit V, 2005, THESIS U CALIFORNIA
- [Anonymous], 2006, 219311 ISOTS
- [Anonymous], 2006, 219291 ISOTS
- Jackson T., 2005, TECHNICAL REPORT
- Jazizadeh F, 2014, ENER G BUILDINGS, V70, P398, DOI 10.1016/j.enbuild.2013.11.066
- Jensen W, 2008, J GREEN BUILD, V3, P93
- Keyvanfar A., 2014, J TEKNOLOGI IN PRESS
- Kim J, 2013, BUILD ENVIRON, V70, P245, DOI 10.1016/j.buildenv.2013.08.022
- Krarti M, 2005, BUILD ENVIRON, V40, P747, DOI 10.1016/j.buildenv.2004.08.007
- Lamit H, 2013, ADV SCI LETT, V19, P3077
- Lan L, 2011, ENER G BUILDINGS, V43, P1057, DOI 10.1016/j.enbuild.2010.09.001
- Leaman A, 1999, BUILD RES INF, V27, P4, DOI 10.1080/096132199369615
- Lee SY, 2005, J ENVIRON PSYCHOL, V25, P323, DOI 10.1016/j.jenvp.2005.08.001
- LEONARDBARTON D, 1981, J CONSUM RES, V8, P243, DOI 10.1086/208861
- Lindelof D, 2008, BUILD RES INF, V36, P83, DOI 10.1080/09613210701544061
- Liu J, 2012, APPL THERM ENG, V35, P40, DOI 10.1016/j.applthermaleng.2011.09.037
- Loe D, 1994, LIGHTING RES TECHNOL, V26, P119, DOI DOI 10.1177/096032719402600301
- Lutzkendorf T, 2006, BUILD RES INF, V34, P334, DOI 10.1080/09613210600672914
- Lutzkendorf T, 2008, J PROP INVEST FINANC, V26, P482
- Lyons P, 2000, P ASHRAE WINT M DALL
- Maaijen R., 2012, REHVA J
- Macfarlane WV, 1987, ARCH SCI REV, V21, P86
- Macmillan S, 2006, BUILD RES INF, V34, P257, DOI 10.1080/09613210600590074
- Mandavi A, 2008, J BUILD PERFORM SIMU, V1, P57, DOI DOI 10.1080/19401490801906502
- [Anonymous], 2007, 1525 MS
- Morgan C, 2003, CLIMATE RES, V24, P267, DOI 10.3354/cr024267
- NEMA, 1989, LIGHT HUM PERF REV
- Newsham G.R, 2005, 48616 NRCC
- Newsham G. R., 1995, P RIGHT LIGHT 3 3 EU, P59
- Nicol J. F., 2001, P 7 INT IBPSA C RIO
- O'Brien W, 2014, BUILD ENVIRON, V77, P77, DOI 10.1016/j.buildenv.2014.03.024
- Ochoa CE, 2006, BUILD ENVIRON, V41, P1128, DOI 10.1016/j.buildenv.2005.05.001
- Oseland NA, 1994, TRENDS THERMAL COMFO
- Osterhaus WKE, 2005, SOL ENERGY, V79, P140, DOI 10.1016/j.solener.2004.11.011
- Ozer I., 2007, MASTERS ABSTR INT, V46, P168
- Parpairi K., 2002, Lighting Research & Technology, V34, P53, DOI 10.1191/1365782802li030oa
- Parys W, 2011, J BUILD PERFORM SIMU, V4, P339, DOI 10.1080/19401493.2010.524711
- Peffer T, 2011, BUILD ENVIRON, V46, P2529, DOI 10.1016/j.buildenv.2011.06.002
- Pensel S, 2010, FACILITIES, V28, P17, DOI 10.1108/02632771011011378
- Qiao B., 2006, P IEEE WIC ACM INT C, P653
- Reinhart CF, 2004, SOL ENERGY, V77, P15, DOI 10.1016/j.solener.2004.04.003
- Rijal HB, 2007, ENER G BUILDINGS, V39, P823, DOI 10.1016/j.enbuild.2007.02.003
- Roetzel A, 2014, BUILD ENVIRON, V71, P165, DOI 10.1016/j.buildenv.2013.10.001
- Roetzel A, 2010, RENEW SUST ENER G REV, V14, P1001, DOI 10.1016/j.rser.2009.11.005
- Rowe DM, 2001, J THERM BIOL, V26, P415, DOI 10.1016/S0306-4565(01)00053-5

Schweiker M, 2012, BUILD ENVIRON, V51, P351, DOI 10.1016/j.buildenv.2011.11.012  
 Shaikh PH, 2014, RENEW SUST ENERG REV, V34, P409, DOI 10.1016/j.rser.2014.03.027  
 Singhvi V., 2005, P 3 INT C EMB NETW S, P218, DOI DOI 10.1145/1098918.1098942  
 Sorrell S, 2009, ENERG POLICY, V37, P1356, DOI 10.1016/j.enpol.2008.11.026  
 Sutter Y, 2006, ENERG BUILDINGS, V38, P780, DOI 10.1016/j.enbuild.2006.03.010  
 Tabak V, 2010, BUILD ENVIRON, V45, P1366, DOI 10.1016/j.buildenv.2009.11.018  
 Taleghani M, 2013, RENEW SUST ENERG REV, V26, P201, DOI 10.1016/j.rser.2013.05.050  
 Taylor MJ, 2011, P C MAN INN SUST BUL, P133  
 Trengenza PR, 1983, LIGHTING RES TECHNOL, V15, P65  
 Trusty WB, 2002, P CAN C BUILD EN SIM  
 USGBC, 2008, US BUILD IMP  
 US Green Building Council-USGBC, 1998, LEAD EN ENV DES LEED  
 Veitch JA, 1998, J ILLUM ENG SOC, V27, P107, DOI 10.1080/00994480.1998.10748216  
 Veitch JA, 1996, ENVIRON BEHAV, V28, P446, DOI 10.1177/0013916596284002  
 Velds M, 2002, SOL ENERGY, V73, P95, DOI 10.1016/S0038-092X(02)00037-3  
 Vesely M, 2014, RENEW SUST ENERG REV, V34, P401, DOI 10.1016/j.rser.2014.03.024  
 Warren PR, 1984, BUILD SERV ENG RES T, V5, P89, DOI DOI 10.1177/014362448400500301  
 Wienold J, 2006, ENERG BUILDINGS, V38, P743, DOI 10.1016/j.enbuild.2006.03.017  
 WINETT RA, 1978, J ENVIRON SYST, V8, P217, DOI 10.2190/6Y43-BM72-NUNK-3HH1  
 WINETT RA, 1979, BEHAVIORAL ASSESSMEN, V1, P139  
 Wolf FM, 2001, TEACH LEARN MED, V13, P54, DOI 10.1207/S15328015TLM1301\_11  
 Yadollah F, 2008, APPL THERM ENG, V28, P1906  
 Yang L, 2014, APPL ENERGY, V115, P164, DOI 10.1016/j.apenergy.2013.10.062  
 Yu Z, 2011, ENERGY, V36, P6596, DOI 10.1016/j.energy.2011.09.002  
 Steemers K., 2007, P CISBAT INT C LAUS  
 Zagreus L, 2004, INDOOR AIR, V14, P65, DOI 10.1111/j.1600-0668.2004.00301.x  
 ZALESNY MD, 1987, ACAD MANAGE J, V30, P240, DOI 10.2307/256272  
 Zhang YF, 2012, BUILD ENVIRON, V54, P137, DOI 10.1016/j.buildenv.2012.02.016  
 Zhao QC, 2014, BUILD ENVIRON, V72, P309, DOI 10.1016/j.buildenv.2013.11.008  
 Zimmerman A, 2001, BUILD RES INF, V29, P168, DOI 10.1080/09613210010016857

NR 149

TC 24

Z9 24

U1 5

U2 52

PU PERGAMON-ELSEVIER SCIENCE LTD

PI OXFORD

PA THE BOULEVARD, LANGFORD LANE, KIDLINGTON, OXFORD OX5 1GB, ENGLAND

SN 1364-0321

J9 RENEW SUST ENERG REV

JI Renew. Sust. Energ. Rev.

PD NOV

PY 2014

VL 39

BP 277

EP 295

DI 10.1016/j.rser.2014.07.094

PG 19

WC GREEN &amp; SUSTAINABLE SCIENCE &amp; TECHNOLOGY; Energy &amp; Fuels

SC Science &amp; Technology - Other Topics; Energy &amp; Fuels

GA AQ1GN

UT WOS:000342530000021

DA 2018-05-03

ER

PT J

AU Menezes, AC

Cripps, A



- Buswell, RA  
 Wright, J  
 Bouchlaghem, D  
 AF Menezes, A. C.  
 Cripps, A.  
 Buswell, R. A.  
 Wright, J.  
 Bouchlaghem, D.
- TI Estimating the energy consumption and power demand of small power equipment in office buildings
- SO ENERGY AND BUILDINGS
- LA English
- DT Article
- DE Small power; Plug loads; Offices; Predictions; Estimates; Computers; Energy consumption; Power demand; Operational performance
- ID LOADS
- AB Small power is a substantial energy end-use in office buildings in its own right, but also significantly contributes to internal heat gains. Technological advancements have allowed for higher efficiency computers, yet current working practices are demanding more out of digital equipment. Designers often rely on benchmarks to inform predictions of small power consumption, power demand and internal gains. These are often out of date and fail to account for the variability in equipment specification and usage patterns in different offices. This paper details two models for estimating small power consumption in office buildings, alongside typical power demand profiles. The first model relies solely on the random sampling of monitored data, and the second relies on a 'bottom-up' approach to establish likely power demand and operational energy use. Both models were tested through a blind validation demonstrating a good correlation between metered data and monthly predictions of energy consumption. Prediction ranges for power demand profiles were also observed to be representative of metered data with minor exceptions. When compared to current practices, which often rely solely on the use of benchmarks, both proposed methods provide an improved approach to predicting the operational performance of small power equipment in offices. (C) 2014 The Authors. Published by Elsevier B.V.
- C1 [Menezes, A. C.; Cripps, A.] AECOM, Sustainable Dev Grp, London WC1V 6QS, England.  
 [Menezes, A. C.; Buswell, R. A.; Wright, J.] Univ Loughborough, Dept Civil & Bldg Engr, Loughborough, Leics, England.  
 [Bouchlaghem, D.] Nottingham Trent Univ, Sch Architecture, Nottingham, England.
- RP Menezes, AC (reprint author), AECOM, MidCity Pl,71 High Holborn, London WC1V 6QS, England.  
 EM annacmenezes@mac.com
- OI Cripps, Andrew/0000-0002-1825-1532
- FU Engineering and Physical Sciences Research Council (EPSRC); Loughborough University; AECOM
- FX The authors would like to thank the Engineering and Physical Sciences Research Council (EPSRC), Loughborough University and AECOM for funding and supporting this research.
- CR BCO, 2009, SMALL POW US OFF  
 BECTA, 2006, THIN CLIENT TECHN SC  
 Bray M., 2006, REV COMPUTER CONSUMP  
 BRECSU, 1993, EN CONS GUID  
 Enquiries Bureau-(BRECSU), 2000, EN CONS GUID  
 BSRIA 14, 2003, RUL THUMB GUID BUILD  
 Carbon Trust, 2006, CTV005  
 CIBSE TM54, 2013, TM54 CIBSE  
 DEFRA, 2011, LONG TERM EN PERF EN  
 Dunn G, 2005, ENERGBUILDINGS, V37, P87, DOI 10.1016/j.enbuild.2004.05.007  
 Efergy, 2013, EN MON SOCK DAT  
 Energy Star, 2013, DRAFT VERS 6 0 DAT R  
 EPA, 2012, ENERGY STAR RETR COM  
 Fleming R., 2011, GOV NEWS, V31, P54  
 CIBSE, 2012, GUID  
 Hosni M., 2010, 1482RP ASHRAE

Jenkins D, 2008, ENER G BUILDINGS, V40, P874, DOI 10.1016/j.enbuild.2007.06.006  
 Johnston James, 2011, CIBSE TECHN S 6 7 SE  
 Kaneda D., 2010, ACEEE SUMMER STUDY E  
 Kawamoto K, 2004, ENER G BUILDINGS, V36, P915, DOI 10.1016/j.enbuild.2004.02.004  
 Kawamoto K, 2002, ENERGY, V27, P255, DOI 10.1016/S0360-5442(01)00084-6  
 Komor P, 1997, ASHRAE J, V39, P41  
 Lanzisera S, 2013, BUILD ENVIRON, V65, P170, DOI 10.1016/j.buildenv.2013.03.025  
 Masoso OT, 2010, ENER G BUILDINGS, V42, P173, DOI 10.1016/j.enbuild.2009.08.009  
 Meeker M., 2010, INTERNET TRENDS  
 Menezes A., 2011, CIBSE TECHN POW OFF  
 Menezes A.C., 2013, THESIS LOUGH BOROUGH  
 Menezes AC, 2013, BUILD SERV ENG RES T, V34, P73, DOI 10.1177/0143624412465092  
 Moorefield L., 2011, OFFICE PLUG LOAD FIE  
 Mungwitikul W, 1997, ENERGY, V22, P673, DOI 10.1016/S0360-5442(97)00162-X  
 Myerson J., 2006, SPACE WORK NEW OFFIC  
 NAEEEP, 2003, STUD OFF EQ OP EN US  
 New Buildings Institute (NBI), 2012, PLUG LOAD BEST PRACT  
 Nordman B., 1996, LBL38057  
 Parsloe C., 1992, 892 TN BUILD SERV RE  
 Roberson J., 2002, LBNL48581  
 Webber C.A., 2006, ENERGY, V31, P2821  
 Wilkins C, 2000, ASHRAE J, V42, P33  
 Wilkins CK, 2011, ASHRAE J, V53, P30  
 WILKINS CK, 1994, ASHRAE J, V36, P21  
 Worthington J., 2005, REINVENTING WORKPLAC

NR 41  
 TC 24  
 Z9 25  
 U1 1  
 U2 11  
 PU ELSEVIER SCIENCE SA  
 PI LAUSANNE  
 PA PO BOX 564, 1001 LAUSANNE, SWITZERLAND  
 SN 0378-7788  
 EI 1872-6178  
 J9 ENER G BUILDINGS  
 JI Energy Build.  
 PD JUN  
 PY 2014  
 VL 75  
 BP 199  
 EP 209  
 DI 10.1016/j.enbuild.2014.02.011  
 PG 11  
 WC Construction & Building Technology; Energy & Fuels; Engineering, Civil  
 SC Construction & Building Technology; Energy & Fuels; Engineering  
 GA AI6UT  
 UT WOS:000337013200020  
 OA gold  
 DA 2018-05-03  
 ER

PT J  
 AU Paudel, S  
 Elmtiri, M  
 Kling, WL  
 Le Corre, O  
 Lacarriere, B

AF Paudel, Subodh  
 Elmtiri, Mohamed  
 Kling, Wil L.  
 Le Corre, Olivier  
 Lacarriere, Bruno

TI Pseudo dynamic transitional modeling of building heating energy demand  
 using artificial neural network

SO ENERGY AND BUILDINGS

LA English

DT Article

DE Building energy prediction; Short term building energy forecasting;  
 Operational heating characteristics; Occupancy profile; Artificial  
 neural network; Orthogonal arrays

ID COOLING LOAD PREDICTION; MIXED ORTHOGONAL ARRAYS; RESIDENTIAL BUILDINGS;  
 CONSUMPTION; SIMULATION; CONSTRUCTION; OPTIMIZATION; VALIDATION

AB This paper presents the building heating demand prediction model with occupancy profile and operational heating power level characteristics in short time horizon (a couple of days) using artificial neural network. In addition, novel pseudo dynamic transitional model is introduced, which consider time dependent attributes of operational power level characteristics and its effect in the overall model performance is outlined. Pseudo dynamic model is applied to a case study of French Institution building and compared its results with static and other pseudo dynamic neural network models. The results show the coefficients of correlation in static and pseudo dynamic neural network model of 0.82 and 0.89 (with energy consumption error of 0.02%) during the learning phase, and 0.61 and 0.85 during the prediction phase, respectively. Further, orthogonal array design is applied to the pseudo dynamic model to check the schedule of occupancy profile and operational heating power level characteristics. The results show the new schedule and provide the robust design for pseudo dynamic model. Due to prediction in short time horizon, it finds application for Energy Services Company (ESCOs) to manage the heating load for dynamic control of heat production system. (C) 2013 Elsevier B.V. All rights reserved.

C1 [Paudel, Subodh; Le Corre, Olivier; Lacarriere, Bruno] CNRS, Ecole Mines Nantes, Dept Energy Syst & Environm, GEPEA,UMR 6144, Nantes, France.

[Paudel, Subodh; Elmtiri, Mohamed] Environm Rech & Innovat, Veolia, Limay, France.

[Paudel, Subodh; Kling, Wil L.] Tech Univ Eindhoven, Dept Elect Engrn, NL-5600 MB Eindhoven, Netherlands.

RP Le Corre, O (reprint author), CNRS, Ecole Mines Nantes, Dept Energy Syst & Environm, GEPEA,UMR 6144, Nantes, France.

EM Olivier.Lecorre@mines-nantes.fr

RI Paudel, Subodh/O-3415-2014

OI Paudel, Subodh/0000-0003-2819-6765

FU Erasmus Mundus Joint Doctoral Programme SELECT+

FX This research has been done in collaboration with Ecole des Mines, Nantes, Technische Universiteit Eindhoven and VEOLIA Environnement Recherche et Innovation, funded through Erasmus Mundus Joint Doctoral Programme SELECT+, the support of which is gratefully acknowledged.

CR Azar E, 2012, ENER BUILDINGS, V55, P841, DOI 10.1016/j.enbuild.2012.10.002

Bompay F, 1998, ATMOS ENVIRON, V32, P4351, DOI 10.1016/S1352-2310(98)00172-1

Catalina T, 2008, ENER BUILDINGS, V40, P1825, DOI 10.1016/j.enbuild.2008.04.001

Chen D, 2012, ENER BUILDINGS, V51, P223, DOI 10.1016/j.enbuild.2012.05.017

Citherlet S., 2001, THESIS SWISS FEDERAL

Crawley DB, 2001, ENER BUILDINGS, V33, P319, DOI 10.1016/S0378-7788(00)00114-6

Dombayci OA, 2010, ADV ENG SOFTW, V41, P141, DOI 10.1016/j.advengsoft.2009.09.012

Dong B, 2005, ENER BUILDINGS, V37, P545, DOI 10.1016/j.enbuild.2004.09.009

Duanmu L, 2013, ENER BUILDINGS, V58, P281, DOI 10.1016/j.enbuild.2012.11.029

Ekici BB, 2009, ADV ENG SOFTW, V40, P356, DOI 10.1016/j.advengsoft.2008.05.003

Franek L, 2013, SIGNAL PROCESS, V93, P1694, DOI 10.1016/j.sigpro.2012.08.016

Girardin L, 2010, ENERGY, V35, P830, DOI 10.1016/j.energy.2009.08.018

Gonzalez PA, 2005, ENER BUILDINGS, V37, P595, DOI 10.1016/j.enbuild.2004.09.006

Haykin S, 1999, NEURAL NETWORKS COMP

Neto AH, 2008, ENER BUILDINGS, V40, P2169, DOI 10.1016/j.enbuild.2008.06.013

Hsieh W. W., 2009, MACHINE LEARNING MET  
 Husaunndee A., 1997, INT IBPSA C PRAG SEP, P269  
 Kalagasidis AS, 2007, ENERGBUILDINGS, V39, P665, DOI 10.1016/j.enbuild.2006.10.007  
 Kalogirou S., 2001, 2001 WORLD C NAP SEP  
 Kalogirou SA, 2000, ENERGY, V25, P479, DOI 10.1016/S0360-5442(99)00086-9  
 Kato K., 2008, INT C SYST MAN CYB O  
 J Laustsen, 2008, ENERGY EFFICIENCY RE  
 Leung MC, 2012, ENERGBUILDINGS, V55, P151, DOI 10.1016/j.enbuild.2012.08.032  
 Li Q., 2010, INT C ADV EN ENG JUN, DOI DOI 10.1109/ICAEE.2010.5557536  
 Li XL, 2010, IEEE T IND ELECTRON, V57, P3639, DOI 10.1109/TIE.2009.2027926  
 Mihalakakou G, 2002, ENERGBUILDINGS, V34, P727, DOI 10.1016/S0378-7788(01)00137-2  
 Nguyen MVM, 2008, J STAT PLAN INFER, V138, P220, DOI 10.1016/j.jspi.2007.05.010  
 Popescu P., 2009, ENERGY, V34, P1447  
 Shilin Q., 2010, INT C COMP MOD SIM J  
 [Anonymous], 1999, CORNOT BLOCKS US GUI, V1  
 Suen CY, 2003, STAT PROBABIL LETT, V65, P161, DOI 10.1016/j.spl.2003.07.014  
 Suen CY, 2003, J STAT PLAN INFER, V115, P623, DOI 10.1016/S0378-3758(02)00165-9  
 Sun YJ, 2013, ENERGBUILDINGS, V68, P20, DOI 10.1016/j.enconman.2013.01.002  
 Underwood C. P., 2008, MODELLING METHODS EN  
 Voyant C, 2012, ENERGY, V39, P341, DOI 10.1016/j.energy.2012.01.006  
 Wan KKW, 2011, BUILD ENVIRON, V46, P223, DOI 10.1016/j.buildenv.2010.07.016  
 Weng WC, 2007, IEEE T ANTENN PROPAG, V55, P723, DOI 10.1109/TAP.2007.891548  
 Wu X, 2011, APPL ENERGBUILDINGS, V88, P3615, DOI 10.1016/j.apenergy.2011.04.041  
 Yao RM, 2005, ENERGBUILDINGS, V37, P663, DOI 10.1016/j.enbuild.2004.09.007  
 Yokoyama R, 2009, ENERGBUILDINGS, V50, P319, DOI 10.1016/j.enconman.2008.09.017  
 Yu W, 2009, 4 INT S NEUR NETW  
 Yun K, 2012, ENERGBUILDINGS, V54, P225, DOI 10.1016/j.enbuild.2012.08.007  
 Zhao HX, 2012, RENEW SUST ENERGBUILDINGS, V16, P3586, DOI 10.1016/j.rser.2012.02.049

NR 43

TC 24

Z9 25

U1 4

U2 29

PU ELSEVIER SCIENCE SA

PI LAUSANNE

PA PO BOX 564, 1001 LAUSANNE, SWITZERLAND

SN 0378-7788

EI 1872-6178

J9 ENERGBUILDINGS

JI Energy Build.

PD FEB

PY 2014

VL 70

BP 81

EP 93

DI 10.1016/j.enbuild.2013.11.051

PG 13

WC Construction &amp; Building Technology; Energy &amp; Fuels; Engineering, Civil

SC Construction &amp; Building Technology; Energy &amp; Fuels; Engineering

GA ABOSP

UT WOS:000331502700009

DA 2018-05-03

ER

PT J

AU Morrissey, J

Meyrick, B

Sivaraman, D

- Horne, RE  
Berry, M  
AF Morrissey, J.  
Meyrick, B.  
Sivaraman, D.  
Horne, R. E.  
Berry, M.
- TI Cost-benefit assessment of energy efficiency investments: Accounting for future resources, savings and risks in the Australian residential sector  
SO ENERGY POLICY  
LA English  
DT Article  
DE Residential building; Thermal efficiency; Cost-benefit  
ID DISCOUNT RATES; CLIMATE-CHANGE; SUSTAINABLE DEVELOPMENT; POLICY-ANALYSIS; UNCERTAINTY; ENVIRONMENT; ECONOMICS; LIFE; WEAK  
AB This article focuses on the impact of the discount rate on cost-benefit assessment of investment options for residential building efficiency. An integrated thermal modeling, life cycle costing approach is applied to an extensive sample of dominant house designs for Australian conditions. The relative significance of predicted thermal performance and the applied discount rate on the Present Value of energy savings from alternative investment scenarios is investigated. Costs and benefits are also evaluated at the economy-wide scale, including carbon pricing considerations, and for a test-case household faced with alternative investment options at the point of construction. The influence of the applied discount rate on produced cost-benefit calculations is investigated, as is the interaction between critical cost-benefit input parameters. Findings support that the discounting framework is the primary driver of difference in estimates about costs and benefits of higher standards of efficiency in the residential sector. Results demonstrate that agreement on a low discount rate based on sustainability principals would prioritise those projects with significant environmental benefits. (C) 2012 Elsevier Ltd. All rights reserved.
- C1 [Morrissey, J.] Univ Otago, Dept Geog, Dunedin 9016, New Zealand.  
[Morrissey, J.; Sivaraman, D.; Horne, R. E.] RMIT Univ, Design Ctr, Melbourne, Vic 3001, Australia.  
[Meyrick, B.; Berry, M.] RMIT Univ, Australian Housing & Urban Res Inst, Melbourne, Vic 3001, Australia.
- RP Morrissey, J (reprint author), Univ Otago, Dept Geog, 354 Leith Walk, Dunedin 9016, New Zealand.  
EM jem@geography.otago.ac.nz; Bronwyn.meyrick@rmit.edu.au;  
Deepak.sivaraman@rmit.edu.au; Ralph.horne@rmit.edu.au;  
mike.berry@rmit.edu.au
- OI Morrissey, John/0000-0002-4986-776X; Sivaraman,  
Deepak/0000-0002-2640-0681
- FU Australian Research Council [LPO776834]
- FX This research is supported under the Australian Research Council's Linkage Projects funding scheme (project LPO776834). The views expressed herein are those of the authors and are not necessarily those of the Australian Research Council. The authors wish to acknowledge the contribution of project partner's the Building Commission, Land Management Corporation and VicUrban as well as Adjunct Professor Alan Pears, RMIT University for his input and advice. The authors also wish to thank the anonymous reviewers whose suggestions greatly strengthened the central argument of the paper.
- CR Abrahamse W, 2009, J ECON PSYCHOL, V30, P711, DOI 10.1016/j.joep.2009.05.006  
ABS, 2012, HOUS FIN  
ABS, 2008, ENV ISS EN US CONS  
ABS, 2009, DWELL UN COMM  
ABS, 2009, HOUS FIN  
AWERBUCH S, 1995, ENER POLICY, V23, P57, DOI 10.1016/0301-4215(95)90766-Z  
Azar C, 1996, ECOL ECON, V19, P169, DOI 10.1016/0921-8009(96)00065-1  
Baum SD, 2009, ECOL ECON, V69, P197, DOI 10.1016/j.ecolecon.2009.08.024  
Campbell H.F., 2003, BENEFIT COST ANAL FI  
Clinch JP, 2001, ENER POLICY, V29, P113, DOI 10.1016/S0301-4215(00)00110-5  
Clune S, 2012, ENER POLICY, V48, P657, DOI 10.1016/j.enpol.2012.05.072  
Commonwealth Government Australia, 2012, CARB PRIC CUT POLL S

CORUM KR, 1982, ENERGY, V7, P389, DOI 10.1016/0360-5442(82)90098-6  
 Department of Finance and Administration Australia, 2006, HDB COST BEN AN  
 DEWHA, 2010, REV GREEN LOANS PROG  
 DEWHA, 2008, EN EFF RAT HOUS PRIC  
 Dietz S, 2007, ECOL ECON, V61, P617, DOI 10.1016/j.ecolecon.2006.09.007  
 Energy Efficient Strategies, 2008, EN US AUSTR RES SECT  
 Faucheux S, 1998, ECOL ECON, V27, P243, DOI 10.1016/S0921-8009(97)00176-6  
 Frederick S, 2006, J ECON PSYCHOL, V27, P667, DOI 10.1016/j.joep.2006.05.007  
 Garnaut R., 2008, GARNAUT CLIMATE CHAN  
 Gasparatos A, 2008, ENVIRON IMPACT ASSES, V28, P286, DOI 10.1016/j.eiar.2007.09.002  
 Guo JH, 2006, ENVIRON SCI POLICY, V9, P205, DOI 10.1016/j.envsci.2005.11.010  
 Gutes MC, 1996, ECOL ECON, V17, P147  
 Denniss R., 2008, ENERGY AFFORDABILITY  
 HAUSMAN JA, 1979, BELL J ECON, V10, P33, DOI 10.2307/3003318  
 Heal G., 2005, HDB ENV EC, V3, P1105, DOI DOI 10.1016/S1574-0099(05)03021-4  
 Hepburn C, 2009, J ENVIRON ECON MANAG, V57, P140, DOI 10.1016/j.jeem.2008.04.004  
 HM Treasury, 2003, GREEN BOOK APPR EV C  
 Home R., 2007, ENHR 2007 INT C SUST  
 Horne R, 2008, J HOUS BUILT ENVIRON, V23, P119, DOI 10.1007/s10901-008-9105-1  
 Horowitz JK, 1996, ECOL ECON, V16, P73, DOI 10.1016/0921-8009(95)00082-8  
 Howarth RB, 2003, LAND ECON, V79, P369, DOI 10.2307/3147023  
 Howarth RB, 1996, ECOL MODEL, V92, P263, DOI 10.1016/0304-3800(95)00172-7  
 Howarth R. B., 2004, ENCY ENERGY, V1, P817  
 Jakob M, 2006, ENER POLICY, V34, P172, DOI 10.1016/j.enpol.2004.08.039  
 Jowsey E., 2003, NEW BASIS EC THEORY  
 Le Dars A, 2007, ENER POLICY, V35, P2995, DOI 10.1016/j.enpol.2006.10.032  
 Lee K, 2009, RENEW SUST ENER REV, V13, P1994, DOI 10.1016/j.rser.2009.01.002  
 MFAA, 2012, IND STAT  
 Morrissey J, 2011, ENER BUILDINGS, V43, P915, DOI 10.1016/j.enbuild.2010.12.013  
 NatHERS, 2009, NATHERS STARB  
 Neumayer E, 1999, ENER POLICY, V27, P33, DOI 10.1016/S0301-4215(98)00063-9  
 Newell RG, 2004, ENER POLICY, V32, P519, DOI 10.1016/S0301-4215(03)00153-8  
 NREL, 2009, CARB TAX REV EXP POL  
 OECD, 2012, WORKSH INN ENV EC IN  
 Office of Best Practice Regulation, 2007, BEST PRACT REG HDB  
 Padilla E, 2002, ECOL ECON, V41, P69, DOI 10.1016/S0921-8009(02)00026-5  
 Philibert C, 1999, ENER POLICY, V27, P913, DOI 10.1016/S0301-4215(99)00081-6  
 Pickin J, 2008, RESOUR CONSERV RECY, V53, P79, DOI 10.1016/j.resconrec.2008.09.003  
 Pulselli RM, 2009, BUILD ENVIRON, V44, P920, DOI 10.1016/j.buildenv.2008.06.009  
 Rabl A, 1996, ECOL ECON, V17, P137  
 Rambaud SC, 2005, ENVIRON SCI POLICY, V8, P343, DOI 10.1016/j.envsci.2005.04.003  
 Rawlinsons, 2009, AUSTR CONSTR HDB  
 Ryghaug M, 2009, ENER POLICY, V37, P984, DOI 10.1016/j.enpol.2008.11.001  
 Saez CA, 2007, ECOL ECON, V60, P712, DOI 10.1016/j.ecolecon.2006.05.002  
 SIMPSON D, 1987, ENER POLICY, V15, P217, DOI 10.1016/0301-4215(87)90083-8  
 Stern N., 2006, EC CLIMATE CHANGE ST  
 Thompson PB, 1997, ENER POLICY, V25, P989, DOI 10.1016/S0301-4215(97)00125-0  
 Tonn BE, 2002, FUTURES, V34, P117, DOI 10.1016/S0016-3287(01)00050-7  
 Victor PA, 2005, ECOL ECON, V52, P127, DOI 10.1016/j.ecolecon.2004.07.006  
 Wang XM, 2010, BUILD ENVIRON, V45, P1663, DOI 10.1016/j.buildenv.2010.01.022  
 Weitzman ML, 1998, J ENVIRON ECON MANAG, V36, P201, DOI 10.1006/jjeem.1998.1052  
 WEITZMAN ML, 1994, J ENVIRON ECON MANAG, V26, P200, DOI 10.1006/jjeem.1994.1012  
 Whitehead C., 2007, HOUSING FINANCE INT, V21, P16  
 Winkler R, 2006, ECOL ECON, V57, P573, DOI 10.1016/j.ecolecon.2005.05.013  
 Wong SK, 2008, HABITAT INT, V32, P283, DOI 10.1016/j.habitatint.2007.08.015  
 Yates J., 2007, HOUSING AFFORDABILIT

NR 68

TC 24

Z9 25  
U1 3  
U2 63  
PU ELSEVIER SCI LTD  
PI OXFORD  
PA THE BOULEVARD, LANGFORD LANE, KIDLINGTON, OXFORD OX5 1GB, OXON, ENGLAND  
SN 0301-4215  
J9 ENERG POLICY  
JI Energy Policy  
PD MAR  
PY 2013  
VL 54  
BP 148  
EP 159  
DI 10.1016/j.enpol.2012.11.005  
PG 12  
WC Economics; Energy & Fuels; Environmental Sciences; Environmental Studies  
SC Business & Economics; Energy & Fuels; Environmental Sciences & Ecology  
GA 106ON  
UT WOS:000316154500017  
DA 2018-05-03  
ER

PT J  
AU Soratana, K  
Marriott, J  
AF Soratana, Kullapa  
Marriott, Joe  
TI Increasing innovation in home energy efficiency: Monte Carlo simulation  
of potential improvements  
SO ENERGY AND BUILDINGS  
LA English  
DT Article  
DE Home energy efficiency; Energy services companies; Low-income household;  
Energy consumption

AB Despite the enormous potential for savings, there is little penetration of market-based solutions in the residential energy efficiency market. We hypothesize that there is a failure in the residential efficiency improvement market: due to lack of customer knowledge and capital to invest in improvements, there is unrecovered savings. In this paper, we model a means of extracting profit from those unrecovered energy savings with a market-based residential energy services company, or RESCO. We use a Monte Carlo simulation of the cost and performance of various improvements along with a hypothetical business model to derive general information about the financial viability of these companies. Despite the large amount of energy savings potential, we find that an average contract length with residential customers needs to be nearly 35 years to recoup the cost of the improvements. However, our modeling of an installer knowledge parameter indicates that experience plays a large part in minimizing the time to profitability for each home. Large numbers of inexperienced workers driven by government investment in this area could result in the installation of improvements with long payback periods, whereas a free market might eliminate companies making poor decisions. (C) 2010 Elsevier B.V. All rights reserved.

C1 [Soratana, Kullapa; Marriott, Joe] Univ Pittsburgh, Dept Civil & Environm Engr, Pittsburgh, PA 15261 USA.

RP Marriott, J (reprint author), Univ Pittsburgh, Dept Civil & Environm Engr, 949 Benedum Hall, 3700 OHara St, Pittsburgh, PA 15261 USA.

EM kus8@pitt.edu

FU Mascaro Center for Sustainable Innovation

FX The authors acknowledge funding for this project from the Mascaro Center for Sustainable Innovation 2008 seed grant and assistance from Conservation Consultants Inc.

CR Bureau of Labor Statistics, 2008, LOC AR UN STAT LAUS

\*CAL PUBL UT COMM, LOW INC EN EFF PROGR  
 \*D R INT, 2005, BUILD EN DAT BOOK 20  
 \*DE EN, 2009, ADM ANN NEARL 8 BILL  
 \*EERF, 2009, USD EN SAV YOUR HOM  
 Energy Information Administration, 2008, ANN EN REV 2008  
 \*EN INF ADM, 2009, CONS PRIC EXP EST 29  
 \*EN INF ADM, 2008, EM GREENH GAS REP 20  
 \*EN INF ADM, 2008, OFF EN STAT US GOV 2  
 \*EN INF ADM, 2009, OFF EN STAT US GOV N  
 GRANADE HC, 2009, UNLOCKING ENERGY EFF, P165  
 HOPPER N, 2007, SURVEY US ESCO IND M, P37  
 \*NAT ASS EN SERV C, 2009, LIHEAP FUND  
 \*NAT ASS EN SERV C, 2009, RES WHAT IS ESCO  
 \*NAT CTR APPR TECH, 2009, STAT LOW INC EN PROF  
 OLSEN J, 2008, ENERGY AUDITS RESIDE  
 SACQUETY R, 2000, ELECT US AVERAGE MON  
 SHINGLER RJ, 2009, LONG TERM STUDY PENN  
 TROTTA G, 2008, TIP DAY CUT YOUR HEA  
 US Census Bureau, STAT COUNT QUICKFACT  
 U. S. Department of Health and Human Services, 2009, 2009 HHS POV GUID ON  
 \*US DOE, 2009, EN EFF REN EN EN SAV  
 US Department of Energy, 2009, EN EFF REN EN  
 \*USDEO, 2008, EN EFF REN EN EN SAV  
 \*USDOE, 2008, EN EFF REN EN EFF TR  
 WASHINGTON HP, 2009, HOME PERFORMANCE  
 Woller J., 1996, BASICS MONTE CARLO S  
 2009, EERE NETWORK NE 0710

NR 28

TC 24

Z9 26

U1 1

U2 10

PU ELSEVIER SCIENCE SA

PI LAUSANNE

PA PO BOX 564, 1001 LAUSANNE, SWITZERLAND

SN 0378-7788

J9 ENERGBUILDINGS

JI Energy Build.

PD JUN

PY 2010

VL 42

IS 6

BP 828

EP 833

DI 10.1016/j.enbuild.2009.12.003

PG 6

WC Construction &amp; Building Technology; Energy &amp; Fuels; Engineering, Civil

SC Construction &amp; Building Technology; Energy &amp; Fuels; Engineering

GA 597GK

UT WOS:000277744400009

DA 2018-05-03

ER

PT S

AU Bang, M

Gustafsson, A

Katzeff, C

AF Bang, Magnus



Gustafsson, Anton  
 Katzeff, Cecilia  
 BE DeKort, Y  
 IJsselsteijn, W  
 Midden, C  
 Eggen, B  
 Fogg, BJ

TI Promoting new patterns in household energy consumption with pervasive learning games

SO PERSUASIVE TECHNOLOGY

SE Lecture Notes in Computer Science

LA English

DT Proceedings Paper

CT 2nd International Conference on Persuasive Technology (PERSUASIVE 2007)

CY APR 26-27, 2007

CL Stanfore Univ, Palo Alto, CA

HO Stanfore Univ

AB Engaging computer games can be used to change energy consumption patterns in the home. PowerAgent is a pervasive game for Java-enabled mobile phones that is designed to influence everyday activities and use of electricity in the domestic setting. PowerAgent is connected to the household's automatic electricity meter reading equipment via the cell network, and this setup makes it possible to use actual consumption data in the game. In this paper, we present a two-level model for cognitive and behavior learning, and we discuss the properties of PowerAgent in relation to the underlying situated learning, social learning, and persuasive technology components that we have included in the game.

C1 [Bang, Magnus; Gustafsson, Anton; Katzeff, Cecilia] Interact Inst, Eskilstuna, Sweden.

EM magnus.bang@tii.se; anton.gustafsson@tii.se; cecilia.katzeff@tii.se

CR Bandura A, 2001, ANNU REV PSYCHOL, V52, P1, DOI 10.1146/annurev.psych.52.1.1  
 Bandura A., 1977, SOCIAL LEARNING THEO  
 BROWN JS, 1989, SITUATED COGNITION C, P32  
 de Vries P, 2006, LECT NOTES COMPUT SC, V3962, P55  
 Fogg B. J., 2003, PERSUASIVE TECHNOLOG  
 Gee JP, 2003, WHAT VIDEO GAMES HAVE TO TEACH US ABOUT LEARNING AND LITERACY, P1  
 Lave Jean, 1991, SITUATED LEARNING LE  
 LINDT I, 2006, C HUM FACT COMP SYST  
 Magerkurth C., 2005, COMPUTERS ENTERTAINM, V3  
 MAYER RE, HDB ED PSYCHOL  
 Ramsden P., 1985, HIGHER ED RES DEV, V4, P51, DOI DOI 10.1080/0729436850040104  
 Sotamaa O., 2002, COMPUTER GAMES DIGIT, P35  
 Thomas S., 2006, Simulation & Gaming, V37, P41, DOI 10.1177/1046878105282274

NR 13  
 TC 24  
 Z9 24  
 U1 2  
 U2 3

PU SPRINGER-VERLAG BERLIN  
 PI BERLIN  
 PA HEIDELBERGER PLATZ 3, D-14197 BERLIN, GERMANY  
 SN 0302-9743  
 BN 978-3-540-77005-3  
 J9 LECT NOTES COMPUT SC  
 PY 2007  
 VL 4744  
 BP 55  
 EP 63  
 PG 9

WC Computer Science, Theory & Methods; Information Science & Library Science; Social Issues

SC Computer Science; Information Science & Library Science; Social Issues

GA BHB41  
 UT WOS:000252076100007  
 DA 2018-05-03  
 ER

PT J  
 AU Carroll, J  
 Lyons, S  
 Denny, E

AF Carroll, James  
 Lyons, Sean  
 Denny, Eleanor

TI Reducing household electricity demand through smart metering: The role  
 of improved information about energy saving

SO ENERGY ECONOMICS

LA English

DT Article

DE Residential electricity demand; Smart meters; Consumption feedback;  
 Household knowledge; Conservation motivations

ID CONSERVATION; CONSUMPTION; FEEDBACK

AB The international roll out of residential smart meters has increased considerably in recent years. The improved consumption feedback provided, and in particular, the installation of in-house displays, has been shown to significantly reduce residential electricity demand in some international trials. This paper attempts to uncover the underlying drivers of such information-led reductions by exploring two research questions. First, does feedback improve a household's stock of information about potential energy reducing behaviours? And second, do improvements in such information help explain the demand reductions associated with the introduction of smart metering and time-of-use tariffs? Data is from a randomised controlled smart metering trial (Ireland) which also collected extensive information on household attitudes towards energy conservation and self-reported stocks of information related to energy saving. As with previous results in Ireland, we find that participation in a smart metering programme with time-of-use tariffs significantly reduces demand. Although treated households also increased their self-reported energy-reducing information, such improvements are not correlated with demand reductions in the short-run. Given this result, it is possible that feedback and other information provided in the context of smart metering are mainly effective in reducing and shifting demand because they act as a reminder and motivator. (C)2014 Elsevier B.V. All rights reserved.

C1 [Carroll, James; Lyons, Sean; Denny, Eleanor] Trinity Coll Dublin, Dept Econ, Dublin, Ireland.

[Lyons, Sean] Econ & Social Res Inst, Dublin, Ireland.

RP Carroll, J (reprint author), Trinity Coll Dublin, Dept Econ, Dublin, Ireland.

EM jacarrol@tcd.ie

OI Lyons, Sean/0000-0002-3526-6947; Denny, Eleanor/0000-0002-7875-6022

CR Abrahamse W, 2005, J ENVIRON PSYCHOL, V25, P273, DOI 10.1016/j.jenvp.2005.08.002

Allcott H, 2011, J PUBLIC ECON, V95, P1082, DOI 10.1016/j.jpubeco.2011.03.003

CER, 2011, APP EL SMART MET CUS

CER, 2011, EL SMART MET CUST BE

CER, 2011, COST BEN AN CBA NAT

Darby S, 2010, LIT REV ENERGY DEMAN

Darby S, 2010, BUILD RES INF, V38, P442, DOI 10.1080/09613218.2010.492660

Faruqui A., 2005, ELECT J, V18, P1040, DOI [10.1016/j.tej.2005.04.005, DOI 10.1016/J.TEJ.2005.04.005]

Faruqui A, 2011, J REGUL ECON, V40, P82, DOI 10.1007/s11149-011-9152-5

Faruqui A, 2010, ENERGY, V35, P1598, DOI 10.1016/j.energy.2009.07.042

Fischer C, 2008, ENERG EFFIC, V1, P79, DOI 10.1007/s12053-008-9009-7

Gram-Hanssen K, 2010, J IND ECOL, V14, P150, DOI 10.1111/j.1530-9290.2009.00194.x

Hledik R, 2009, ELECT J, V22, P29

Karaca-Mandic P, 2012, HEALTH SERV RES, V47, P255, DOI 10.1111/j.1475-6773.2011.01314.x

Krishnamurti T, 2012, ENERG POLICY, V41, P790, DOI 10.1016/j.enpol.2011.11.047

MIT, 2011, FUT EL GRID

Newsham GR, 2010, ENERG POLICY, V38, P3289, DOI 10.1016/j.enpol.2010.01.027

OFGEM, 2011, EN DEM RES PROJ FIN

Stevenson F, 2010, BUILD RES INF, V38, P549, DOI 10.1080/09613218.2010.496182  
Wooldridge JM, 2010, ECONOMETRIC ANALYSIS OF CROSS SECTION AND PANEL DATA, 2ND EDITION, P1

NR 20

TC 23

Z9 23

U1 2

U2 24

PU ELSEVIER SCIENCE BV

PI AMSTERDAM

PA PO BOX 211, 1000 AE AMSTERDAM, NETHERLANDS

SN 0140-9883

EI 1873-6181

J9 ENERG ECON

J1 Energy Econ.

PD SEP

PY 2014

VL 45

BP 234

EP 243

DI 10.1016/j.eneco.2014.07.007

PG 10

WC Economics

SC Business & Economics

GA AR5GQ

UT WOS:000343613500021

DA 2018-05-03

ER

PT J

AU Yu, S

Eom, J

Zhou, YY

Evans, M

Clarke, L

AF Yu, Sha

Eom, Jiyong

Zhou, Yuyu

Evans, Meredydd

Clarke, Leon

TI Scenarios of building energy demand for China with a detailed regional representation

SO ENERGY

LA English

DT Article

DE China; Building energy use; Integrated assessment; Downscaled analysis; Climate change

ID CLIMATE-CHANGE; RESIDENTIAL BUILDINGS; RURAL CHINA; CONSUMPTION; COUNTY; PROVINCE; SECTOR; AREAS; MODEL

AB Building energy consumption currently accounts for 28% of China's total energy use and is expected to continue to grow induced by floorspace expansion, income growth, and population change. Fuel sources and building services are also evolving over time as well as across regions and building types. To understand sectoral and regional difference in building energy use and how socioeconomic, physical, and technological development influence the evolution of the Chinese building sector, this study developed a building energy use model for China downscaled into four climate regions under an integrated assessment framework. Three building types (rural residential, urban residential, and commercial) were modeled specifically in each climate region. Our study finds that the Cold and Hot Summer Cold Winter regions lead in total building energy use. The impact of climate change on heating energy use is more significant

than that of cooling energy use in most climate regions. Both rural and urban households will experience fuel switch from fossil fuel to cleaner fuels. Commercial buildings will experience rapid growth in electrification and energy intensity. Improved understanding of Chinese buildings with climate change highlighted in this study will help policy makers develop targeted policies and prioritize building energy efficiency measures. (C) 2014 Elsevier Ltd. All rights reserved.

C1 [Yu, Sha; Zhou, Yuyu; Evans, Meredydd; Clarke, Leon] Pacific NW Natl Lab, College Pk, MD 20740 USA. [Eom, Jiyong] Korea Adv Inst Sci & Technol, Sch Business, Grad Sch Green Growth, Seoul 130722, South Korea.

RP Yu, S (reprint author), Pacific NW Natl Lab, 5825 Univ Res Court, Suite 3500, College Pk, MD 20740 USA. EM sha.yu@pnnl.gov

RI Eom, Jiyong/A-1161-2014

OI Eom, Jiyong/0000-0002-8092-5921

FU Office of Energy Efficiency and Renewable Energy of the U.S. Department of Energy; Global Technology Strategy Program; U.S. Department of Energy by the Battelle Memorial Institute [DE-AC05-76RL01830]

FX The authors are grateful for research support provided by the Office of Energy Efficiency and Renewable Energy of the U.S. Department of Energy and the Global Technology Strategy Program. The authors acknowledge long-term support for GCAM development from the Integrated Assessment Research Program in the Office of Science of the U.S. Department of Energy. The Pacific Northwest National Laboratory is operated for the U.S. Department of Energy by the Battelle Memorial Institute under contract DE-AC05-76RL01830. The views and opinions expressed in this paper are those of the authors alone.

CR Amato AD, 2005, CLIMATIC CHANGE, V71, P175, DOI 10.1007/s10584-005-5931-2

Annunziata E, 2013, ENERGY, V57, P125, DOI 10.1016/j.energy.2012.11.049

Brockett D, 2002, ACEEE SUMMER STUDY B, P29

Buyukalaca O, 2001, APPL ENERG, V69, P269, DOI 10.1016/S0306-2619(01)00017-4

Chaturvedi V., ENERGY POLICY

Chen L, 2006, ECOL ECON, V58, P407, DOI 10.1016/j.ecolecon.2005.07.018

Chen SQ, 2008, ENERGBUILDINGS, V40, P654, DOI 10.1016/j.enbuild.2007.04.022

Chen Y, 2010, RENEW SUST ENERGEREV, V14, P545, DOI 10.1016/j.rser.2009.07.019

CLARKE JF, 1993, ENERGECON, V15, P123, DOI 10.1016/0140-9883(93)90031-L

Clarke L, 2007, CCSP SYNTHESIS ASS A

Clarke L., 2008, CO2 EMISSION MITIGAT

DOE, 2009, US BUILD EN DAT BOOK

EDMONDS J, 1983, ENERGECON, V5, P74, DOI 10.1016/0140-9883(83)90014-2

EIA, 2011, INT EN OUTL 2011

Eom J, 2012, ENERGY, V46, P405, DOI 10.1016/j.energy.2012.08.009

Evans M., 2010, ENFORCING BUILDING E

Evans M, 2013, ENERGY POLICY

GBS, 1980, GUANGD STAT YB

Glicksman LR, 2001, ANNU REV ENERGENV, V26, P83, DOI 10.1146/annurev.energy.26.1.83

HBS, 1980, HEIL STAT YB

Kejuan Jiang, 2001, EVALUATION TECHNOLOG

IEA, 2011, WORLD EN OUTL 2011

International Energy Agency (IEA), 2011, KEY WORLD EN STAT

IEA, 2010, 2008 EN BAL

IEA, 2007, INT COMB HEAT POW DI

Isaac M, 2009, ENERGPOLICY, V37, P507, DOI 10.1016/j.enpol.2008.09.051

JBS, 1980, JIANGS STAT YB

Jiang KJ, 2006, ENVIRON ECON POLICY, V7, P233, DOI 10.1007/s10018-005-010S-z

Kang Y, 2005, INT J GLOBAL ENERGY, V24

Krey V, 2012, ENERGECON, V34, pS272, DOI 10.1016/j.eneco.2012.04.013

Kyle P., 2010, ENERGY J, V31

LBNL, 2008, CHIN EN DAT V 7 0

Li DHW, 2013, ENERGY, V54, P1, DOI 10.1016/j.energy.2013.01.070

Li DHW, 2012, ENERGY, V42, P103, DOI 10.1016/j.energy.2012.03.044

Li M, 2011, SUSTAINABLE DESIGN O  
 Lin E.D., 2011, RURAL DEV ITS ENERGY  
 Lv S, 2007, HVAC, V9, P20  
 MOC, 1993, STAND CLIM REG ARCH  
 MOHURD, 2013, DES STAND EN EFF RUR  
 Nakagami H, 2008, ACEEE SUMMER STUDY E, P214  
 National Bureau of Statistics of Chins (NBSC), 2012, CHIN STAT YB 2012  
 NBSC, 2010, STAT COMM PEOPL REP  
 NBSC (National Bureau of Statistics of China), 2006, CHIN STAT YB 2006  
 National Bureau of Statistics of the People's Republic of China (NBSC), 2010, CHIN STAT YB 2010  
 National Bureau of Statistics of China (NBSC), 1999, COMPR STAT DAT MAT 5  
 Olonscheck M, 2011, ENERG POLICY, V39, P4795, DOI 10.1016/j.enpol.2011.06.041  
 Shen JF, 2006, INT STAT REV, V74, P89, DOI 10.1111/j.1751-5823.2006.tb00163.x  
 TBS, 1980, TIANJ STAT YB  
 THUBERC, 2011, 2011 ANN REP CHIN BU  
 Tonooka Y, 2003, J ASIAN ARCHIT BUILD, V2, P93  
 Tonooka Y, 2006, ENERG BUILDINGS, V38, P1335, DOI 10.1016/j.enbuild.2006.04.011  
 UN, 2010, WORLD URB PROSP 2010  
 van Vuuren DP, 2007, GLOBAL ENVIRON CHANG, V17, P114, DOI 10.1016/j.gloenvcha.2006.04.004  
 Wan KKW, 2011, BUILD ENVIRON, V46, P223, DOI 10.1016/j.buildenv.2010.07.016  
 Wan KW, 2011, INVESTIGATION IMPACT  
 Wang XH, 2005, RENEW SUST ENERG REV, V9, P229, DOI 10.1016/j.rser.2004.04.004  
 Wang XH, 2005, RENEW SUST ENERG REV, V9, P101, DOI 10.1016/j.rser.2004.02.001  
 Wang XH, 1999, ENERGY, V24, P493, DOI 10.1016/S0360-5442(99)00006-7  
 Wang XH, 2002, BIOMASS BIOENERG, V22, P251, DOI 10.1016/S0961-9534(02)00013-2  
 Wang XH, 1997, ENERGY, V22, P511  
 Wang XH, 2001, ENERG POLICY, V29, P1391  
 Wilbanks T. J., 2007, CLIMATE CHANGE 2007, V2007, P357  
 World Bank, 2011, WORLD DEVELOPMENT REPORT 2011: CONFLICT, SECURITY AND DEVELOPMENT, P1, DOI 10.1596/978-0-8213-8439-8  
 Wu Y, 2007, POLICY STUDY CHINA B  
 Wu Yong, 2007, STUDY CHINA BUILDING  
 Yang X, INT C ENH BUILD OP B  
 YANG X, 2010, FRONT ENERGY POWER E, V4, P35  
 Yu L, 2008, J ENV ENG, V73, P183  
 Zhang QY, 2004, ENERG BUILDINGS, V36, P1217, DOI 10.1016/j.enbuild.2003.08.002  
 Zhao J, 2009, ENERG POLICY, V37, P2106, DOI 10.1016/j.enpol.2008.11.045  
 Zhao J, 2009, ENERG POLICY, V37, P2092, DOI 10.1016/j.enpol.2008.11.043  
 Zhou N, 2008, ENERG BUILDINGS, V40, P2121, DOI 10.1016/j.enbuild.2008.06.009  
 Zhou Y, 2013, J OPTIMIZ THEORY APP, V156, P1, DOI 10.1007/s10957-013-0271-2  
 Zhou ZR, 2009, RENEW SUST ENERG REV, V13, P187, DOI 10.1016/j.rser.2007.05.006

NR 74  
 TC 23  
 Z9 23  
 U1 5  
 U2 39

PU PERGAMON-ELSEVIER SCIENCE LTD  
 PI OXFORD  
 PA THE BOULEVARD, LANGFORD LANE, KIDLINGTON, OXFORD OX5 1GB, ENGLAND  
 SN 0360-5442  
 EI 1873-6785  
 J9 ENERGY  
 JI Energy  
 PD APR 1  
 PY 2014  
 VL 67  
 BP 284  
 EP 297

DI 10.1016/j.energy.2013.12.072

PG 14

WC Thermodynamics; Energy & Fuels

SC Thermodynamics; Energy & Fuels

GA AE7BN

UT WOS:000334151800026

DA 2018-05-03

ER

PT J

AU Gram-Hanssen, K

AF Gram-Hanssen, Kirsten

TI Existing buildings - Users, renovations and energy policy

SO RENEWABLE ENERGY

LA English

DT Article; Proceedings Paper

CT WREC The World Renewable Energy Congress

CY MAY 08-13, 2011

CL Linköping, SWEDEN

DE Detached houses; Energy renovations; User practices; Energy policy

AB This paper deals with the energy consumption of existing owner-occupied detached houses and the question of how they can be energy renovated. Data on the age of the Danish housing stock, and its energy consumption is presented. Research on the potential for energy reductions in the Danish housing sector is discussed, and it is shown that there is a huge potential for reductions. It is a well-known problem that even if there are relevant technical means and even if it is economically feasible, the majority of house owners do not energy renovate their homes. This paper intends to address what can be done to solve this problem. The paper draws on different sources of why, when, and how, people do not energy renovate their homes. These results are then compared and discussed together with a presentation and discussion of the Danish policy measures aimed at encouraging people to energy renovate their homes. These policy measures include building regulations, energy tax and different types of incentives and information dissemination. The conclusion calls for new and innovative policy measures to cope with the realities of renovations of owner-occupied houses and how energy efficiency improvement could be part of that. (C) 2013 Elsevier Ltd. All rights reserved.

C1 Aalborg Univ, Danish Bldg Res Inst, Aalborg, Denmark.

RP Gram-Hanssen, K (reprint author), Aalborg Univ, Danish Bldg Res Inst, Aalborg, Denmark.

EM kgh@sbi.dk

OI Gram-Hanssen, Kirsten/0000-0002-8543-2501

CR [Anonymous], 2008, KLIM KONK 2008

Danish Energy Authorities, 2009, EN STAT

Gram-Hanssen K, 2007, ENERG POLICY, V35, P2879, DOI 10.1016/j.enpol.2006.10.017

Gram-Hanssen K., 2005, NOTAT ENERGIMAERKNIN

Gram-Hanssen K, 2011, ENERGY EFFICIENCY EX

Gram-Hansen K., 2004, HOUSING THEORY SOC, V21, P17, DOI DOI 10.1080/14036090410025816

Gram-Hanssen K, 2000, RENOVERING ENFAMILIE

Gram-Hanssen, 2011, FINDINGS RECOMMENDAT, V2011

Kvale S., 1996, INTERVIEWS INTRO QUA

Meijer F, 2009, BUILD RES INF, V37, P533, DOI 10.1080/09613210903189376

Power A, 2008, ENERG POLICY, V36, P4487, DOI 10.1016/j.enpol.2008.09.022

Stiess I, 2009, C P ECEEE SUMM STUD

Thomsen A, 2009, BUILD RES INF, V37, P649, DOI 10.1080/09613210903189335

Kj&AELIG;rbye V, 2011, 1 ENERGY EFFICIENCY, P1621

Witchen KB, 2009, POTENTIELLE ENERGIBE

Zundel S., J CONSUMER POLICY, V34, P91

NR 16

TC 23

Z9 23

U1 0

U2 19

PU PERGAMON-ELSEVIER SCIENCE LTD  
PI OXFORD  
PA THE BOULEVARD, LANGFORD LANE, KIDLINGTON, OXFORD OX5 1GB, ENGLAND  
SN 0960-1481  
J9 RENEW ENERG  
JI Renew. Energy  
PD JAN  
PY 2014  
VL 61  
BP 136  
EP 140  
DI 10.1016/j.renene.2013.05.004  
PG 5  
WC GREEN & SUSTAINABLE SCIENCE & TECHNOLOGY; Energy & Fuels  
SC Science & Technology - Other Topics; Energy & Fuels  
GA 241BI  
UT WOS:000326141000022  
DA 2018-05-03  
ER

PT J

AU Yu, BY

Zhang, JY

Fujiwara, A

AF Yu, Biying

Zhang, Junyi

Fujiwara, Akimasa

TI Representing in-home and out-of-home energy consumption behavior in  
Beijing

SO ENERGY POLICY

LA English

DT Article

DE Household energy consumption behavior; Joint representation; MDCEV

ID LIFE-STYLE; ELECTRICITY CONSUMPTION; RESIDENTIAL SECTOR; MODEL;

REQUIREMENTS; IMPACT; APPLIANCES; HOUSEHOLDS; OWNERSHIP; EMISSIONS

AB It is expected that in-home and out-of-home energy consumption behavior in a household might be correlated with each other, probably due to the existence of household budget constraints. Ownership and usage of energy-saving technologies for in-home appliances (or vehicles) might lead to the increase in out-of-home (or in-home) energy consumption. It is therefore necessary to jointly represent in-home and out-of-home energy consumption in the same modeling framework. With this consideration, we first build a new type of energy consumption model based on the Multiple Discrete-Continuous Extreme Value (MDCEV) modeling framework. Next, we conducted a questionnaire survey in Beijing in 2009 and successfully collected the information about households' energy consumption, ownership/usage of in-home appliances and vehicles, and households' and their members' attributes from 1014 households. Throughout an empirical analysis, it is confirmed that the MDCEV model is effective to simultaneously describe the in-home and out-of-home energy consumption behavior. In addition, it is revealed that a set of household and personal attributes affect the ownership and usage of in-home appliances and vehicles. Furthermore, it is shown that the unobserved factors play a much more important role in explaining energy consumption behavior than the observed attributes of households and their members. (C) 2011 Elsevier Ltd. All rights reserved.

C1 [Yu, Biying; Zhang, Junyi; Fujiwara, Akimasa] Hiroshima Univ, Grad Sch Int Dev & Cooperat,  
Higashihiroshima 724, Japan.

RP Yu, BY (reprint author), Hiroshima Univ, Grad Sch Int Dev & Cooperat, Higashihiroshima 724, Japan.

EM yubiyang@yahoo.com.cn

RI feng, tingting/A-9545-2012; Zhang, Junyi/B-4865-2012; Fujiwara,  
Akimasa/N-3328-2013

OI Zhang, Junyi/0000-0002-3267-542X; Fujiwara, Akimasa/0000-0002-3354-0631

FU Japan Society for the Promotion of Science (JSPS) [22246068]; Ministry

of Environment, Japan [S-6]

- FX This research is jointly supported by the Grants-in-Aid for Scientific Research (A) "Development of Cross-Sector Urban Planning and Management Methodologies by Establishing Theory of Citizens' Life Decisions and Behavior (Principal Researcher: Dr. Junyi ZHANG, Hiroshima University)" (No. 22246068) of the Japan Society for the Promotion of Science (JSPS), and the Environment Research and Technology Development Fund "Establishing of Methodology to Evaluate Middle to Long Term Environmental Policy Options toward Asian Low-Carbon Society (S-6)" of the Ministry of Environment, Japan.
- CR Abrahamse W, 2005, J ENVIRON PSYCHOL, V25, P273, DOI 10.1016/j.jenvp.2005.08.002  
 Achao C, 2009, ENERG POLICY, V37, P5208, DOI 10.1016/j.enpol.2009.07.043  
 Aydinalp M, 2002, APPL ENERG, V71, P87, DOI 10.1016/S0306-2619(01)00049-6  
 Bhat CR, 2008, TRANSPORT RES B-METH, V42, P274, DOI 10.1016/j.trb.2007.06.002  
 Bhat CR, 2009, TRANSPORT RES B-METH, V43, P1, DOI 10.1016/j.trb.2008.06.009  
 Bhat CR, 2005, TRANSPORT RES B-METH, V39, P679, DOI 10.1016/j.trb.2004.08.003  
 Bin S, 2005, ENERG POLICY, V33, P197, DOI 10.1016/S0301-4215(03)00210-6  
 CHIKARAISHI M, 2009, 12 INT C TRAV BEHAV  
 Chiou YC, 2009, TRANSPORT RES A-POL, V43, P665, DOI 10.1016/j.tra.2009.06.002  
 DEJONG GC, 1990, EUR ECON REV, V34, P971, DOI 10.1016/0014-2921(90)90018-T  
 DUBIN JA, 1984, ECONOMETRICA, V52, P345, DOI 10.2307/1911493  
 van Engelenburg B. C. W., 1994, ENERG POLICY, V22, P648  
 \*ESCAP, 2009, EC SOC COMM AS PAC A  
 Feng Y., 2005, NBER WORKING PAPER S  
 Ferdous N, 2010, TRANSPORTATION, V37, P363, DOI 10.1007/s11116-010-9264-2  
 FETTERS E, 2008, GAS GROCERY PRICES D  
 Fuks M, 2008, ENERG ECON, V30, P1672, DOI 10.1016/j.eneco.2007.09.006  
 Garling T. D., 2002, TRANSPORT POLICY, V9, P59, DOI DOI 10.1016/S0967-070X(01)00035-X  
 HEBERLEIN TA, 1983, J ECON PSYCHOL, V4, P107  
 HITCHCOCK G, 1993, ENERG BUILDINGS, V20, P151, DOI 10.1016/0378-7788(93)90006-G  
 IRORLMONGER DS, 1995, ENERG ECON, V17, P301  
 ISHIDA K, 1997, T AIJ, V501, P29  
 Leahy E, 2010, ENERG POLICY, V38, P4265, DOI 10.1016/j.enpol.2010.03.056  
 Lenzen M, 2006, ENERGY, V31, P181, DOI 10.1016/j.energy.2005.01.009  
 LINCIANO N, 1997, INT J TRANSP ECON, V24, P435  
 LUTZENHISER L, 1992, ENERGY, V17, P47, DOI 10.1016/0360-5442(92)90032-U  
 LUTZENHISER L, 1993, ANNU REV ENERG ENV, V18, P247, DOI 10.1146/annurev.energy.18.1.247  
 MANNERING F, 1985, RAND J EC  
 Mansouri I, 1996, APPL ENERG, V54, P211, DOI 10.1016/0306-2619(96)00001-3  
 MIURA S, 1998, T AIJ, V510, P77  
 Moll HC, 2005, J IND ECOL, V9, P259, DOI 10.1162/1088198054084662  
 Nijdam DS, 2005, J IND ECOL, V9, P147, DOI 10.1162/1088198054084725  
 O'Doherty J, 2008, APPL ENERG, V85, P650, DOI 10.1016/j.apenergy.2008.01.001  
 ONEILL BC, 2002, METHODS ANAL, P53  
 Pachauri S, 2004, ENERG POLICY, V32, P1723, DOI 10.1016/S0301-4215(03)00162-9  
 Sanchez T. W., 2006, 85 ANN M TRANSP RES  
 SAWACHI T, 1994, T AIJ, V462, P41  
 SCHIPPER L, 1989, ANNU REV ENERGY, V14, P273, DOI 10.1146/annurev.eg.14.110189.001421  
 SCHIPPER L, 1983, ENERG POLICY, V11, P131, DOI 10.1016/0301-4215(83)90026-5  
 SELIGMAN C, 1979, J APPL SOC PSYCHOL, V9, P70, DOI 10.1111/j.1559-1816.1979.tb00795.x  
 Shimoda Y, 2004, BUILD ENVIRON, V39, P959, DOI 10.1016/j.buildenv.2004.01.020  
 Spangenberg JH, 2002, ECOL ECON, V43, P127, DOI 10.1016/S0921-8009(02)00212-4  
 SUSAN LH, 2009, INT ASS TRAVEL BEHAV  
 Swan LG, 2009, RENEW SUST ENERG REV, V13, P1819, DOI 10.1016/j.rser.2008.09.033  
 TRAIN K, 1983, TRANSP RES BOARD ANN  
 Unander F, 2004, ENERG POLICY, V32, P1395, DOI 10.1016/S0301-4215(03)00106-X  
 VERA B, 2009, ECOLOGICAL EC, V68, P2859  
 VRINGER K, 1995, ENERG POLICY, V23, P893, DOI 10.1016/0301-4215(95)00072-Q



Weber C, 2000, ENER POLICY, V28, P549, DOI 10.1016/S0301-4215(00)00040-9  
Wei YM, 2007, ENER POLICY, V35, P247, DOI 10.1016/j.enpol.2005.11.020  
West SE, 2004, J PUBLIC ECON, V88, P735, DOI 10.1016/S0047-2727(02)00186-X  
Yamasaki E, 1997, ENER POLICY, V25, P903, DOI 10.1016/S0301-4215(97)00040-2  
Zhang QY, 2004, ENER BUILDINGS, V36, P1217, DOI 10.1016/j.enbuild.2003.08.002

NR 53

TC 23

Z9 24

U1 1

U2 22

PU ELSEVIER SCI LTD

PI OXFORD

PA THE BOULEVARD, LANGFORD LANE, KIDLINGTON, OXFORD OX5 1GB, OXON, ENGLAND

SN 0301-4215

J9 ENER POLICY

JI Energy Policy

PD JUL

PY 2011

VL 39

IS 7

SI SI

BP 4168

EP 4177

DI 10.1016/j.enpol.2011.04.024

PG 10

WC Economics; Energy & Fuels; Environmental Sciences; Environmental Studies

SC Business & Economics; Energy & Fuels; Environmental Sciences & Ecology

GA 790WG

UT WOS:000292620800031

DA 2018-05-03

ER

PT J

AU Tao, J

Yu, SR

AF Tao, Jing

Yu, Suiran

TI Implementation of energy efficiency standards of household  
refrigerator/freezer in China: Potential environmental and economic  
impacts

SO APPLIED ENERGY

LA English

DT Article

DE Household refrigerator; Energy efficiency standard; Electricity  
conservation; Life cycle cost; Benefit/cost ratio

ID LABELS

AB Due to the rapid economic development, living standards in China are improving fast. Chinese families are having more household electrical appliances, among which refrigerators are indispensable. Energy consumption of refrigerators is huge in China and causes environmental concerns. China has issued the national energy efficiency standards of household refrigerators, GB12021.2-2003 and GB12021.2-2008 to promote high-efficiency refrigerator production and use. This study evaluated the impacts of the standards on the environment, manufacturers and consumers over a long-term period of 2003-2023. It first evaluated the potential electricity conservation and GHG emission reduction resulting from energy efficiency improvements driven by the standards. Next, manufacturers' technological and economic concerns about complying with the standards were discussed. Some efficiency improving design options were considered and the resulting increases in manufacturing cost and retail price were estimated. The return of consumers from invest in efficiency was analyzed based on lifecycle cost saving of the improved models. The economical viability of the standards was then evaluated by national consumer costs and benefits. Results

showed that the considered efficiency standards will potentially save a cumulative total of 588-1180 TWh electricity, and reduce emission of 629-1260 million tons of CO<sub>2</sub>, 4.00-8.04 million tons of SO<sub>x</sub> and 2.37-4.76 million tons of NO<sub>x</sub> by 2023, depending on sale share of models by efficiency. In a more environmentally optimal case (75% sale share of high-efficiency models), the national consumer benefits are 121 billion RMB (discounted), with the benefit/cost ratio of consumer's expenditure being 1.45:1. However, the preference to high-efficiency models is substantially influenced by consumer's expectation on return from the additional cost on efficiency. (C) 2010 Elsevier Ltd. All rights reserved.

C1 [Tao, Jing; Yu, Suiran] Shanghai Jiao Tong Univ, Sch Mech & Power Engrn, Shanghai 200240, Peoples R China.

RP Yu, SR (reprint author), Shanghai Jiao Tong Univ, Sch Mech & Power Engrn, 800 Dongchuan Rd, Shanghai 200240, Peoples R China.

EM sryu@sjtu.edu.cn

FU National Natural Science Foundation of China [50775141]

FX This study is supported by National Natural Science Foundation of China, Project No. 50775141.

CR \*AQSIQ CHIN, 2008, MAX ALL VAL EN CONS

\*AQSIQ CHIN, 2003, MAX ALL VAL EN CONS

\*CHIN NAT I STAND, 2003, G020606375 CHIN NAT

China National Light Industry Council (CNLIC) China Light Industry Yearbook, 2008, CHIN LIGHT IND YB 20, P2008

Cole H., 1980, RESIDENTIAL ENERGY D

\*ED BOARD CHIN EL, 1995, ED BOARD CHIN EL POW

FENG D, 2010, ENERG POLICY, V32, P1202

International Energy Agency, 2004, WORLD EN OUTL 2004

Kiatkittipong W, 2008, J CLEAN PROD, V16, P1339, DOI 10.1016/j.jclepro.2007.06.019

Lu W, 2006, ENERG POLICY, V34, P1583, DOI 10.1016/j.enpol.2004.12.012

MA Y, 2003, REFRIG AIR CONDITION, V3, P6

Mahlia TMI, 2002, ENERG CONVERS MANAGE, V43, P743, DOI 10.1016/S0196-8904(01)00073-5

Masjuki HH, 2001, ENERGY, V26, P723, DOI 10.1016/S0360-5442(01)00028-7

McNeil M.A., 2006, VALUE STANDARDS LABE

McNeil MA, 2010, ENERG BUILDINGS, V42, P783, DOI 10.1016/j.enbuild.2009.11.015

MEIER AK, 1983, ENERGY, V8, P957, DOI 10.1016/0360-5442(83)90094-4

Meyers S, 2003, ENERGY, V28, P755, DOI 10.1016/S0360-5442(02)00188-3

National Bureau of Statistics of China, 2009, CHIN STAT YB 2009

\*PRC SAC NAT STAND, 2008, GEN REQ FIX NUMB YEA

Saidur R, 2002, ENERG CONVERS MANAGE, V43, P845, DOI 10.1016/S0196-8904(01)00069-3

State Statistical Bureau China Statistical Yearbook of China, 2009, STAT YB CHIN 2009, P2009

Steenhof PA, 2007, ENERG POLICY, V35, P280, DOI 10.1016/j.enpol.2005.11.024

TRAIN KE, 1995, ENERGY J, V16, P55

Train K. E., 2003, DISCRETE CHOICE METH

Population Division of the Department of Economic and Social Affairs of the United Nations Secretaria, 2009, WORLD POP PROSP 2008

\*UNDP, 2007, CAS STUD CHIN EN EFF

Wiel S, 2003, ENERG POLICY, V31, P1403, DOI 10.1016/S0301-4215(02)00199-4

Wiel S., 2006, ENERGY SUSTAIN DEV, V10, P54

Zhao R., 2003, CHINA ECON REV, V14, P131

NR 29

TC 23

Z9 23

U1 3

U2 15

PU ELSEVIER SCI LTD

PI OXFORD

PA THE BOULEVARD, LANGFORD LANE, KIDLINGTON, OXFORD OX5 1GB, OXON, ENGLAND

SN 0306-2619

J9 APPL ENERG

J1 Appl. Energy

PD MAY

PY 2011  
 VL 88  
 IS 5  
 BP 1890  
 EP 1905  
 DI 10.1016/j.apenergy.2010.11.015  
 PG 16  
 WC Energy & Fuels; Engineering, Chemical  
 SC Energy & Fuels; Engineering  
 GA 734TF  
 UT WOS:000288360500047  
 DA 2018-05-03  
 ER

PT J

AU Isaacs, N  
 Saville-Smith, K  
 Camilleri, M  
 Burrough, L

AF Isaacs, Nigel  
 Saville-Smith, Kay  
 Camilleri, Michael  
 Burrough, Lisa

TI Energy in New Zealand houses: comfort, physics and consumption

SO BUILDING RESEARCH AND INFORMATION

LA English

DT Article

DE building performance; building stock; demand temperature; fuel poverty;  
 housing; inhabitant behaviour; residential energy use; space heating;  
 New Zealand

AB The Household Energy End-use Study (HEEP) quantified how, where, when, and why energy was used in New Zealand houses based on the monitoring of energy and end-uses in a national sample of 400 houses. Based on these data, space heating was found to average 34% of total household energy use. Three issues are highlighted in relation to space heating: firstly, the extent to which low indoor temperatures are associated with persistent under-heating; secondly, whether some space-heating sources tend to be associated with higher (or lower) winter indoor temperatures than others; and thirdly, what the drivers of under-heating might be. An overview of the HEEP research and its complex data set is provided. The range of winter indoor temperatures are then compared with international benchmarks and established healthy temperature ranges. Occupants' perceptions of winter indoor temperature conditions are presented and explored in relation to heating patterns and household energy consumption. The impacts of this research have assisted in changing public policy, moving from a narrow focus on energy efficiency toward an integrated energy, environmental, and health policy for the building stock and future interventions.

C1 [Isaacs, Nigel; Camilleri, Michael; Burrough, Lisa] BRANZ Ltd, Porirua City, New Zealand.  
 [Saville-Smith, Kay] CRESA, Wellington, New Zealand.

RP Isaacs, N (reprint author), BRANZ Ltd, Private Bag 50908, Porirua City, New Zealand.

EM Nigel.Isaacs@branz.co.nz; kay@cresa.co.nz;

Michael.Camilleri@branz.co.nz; Lisa.Burrough@branz.co.nz

OI Isaacs, Nigel/0000-0002-1348-4644

FU New Zealand government's Foundation for Research Science and Technology

FX This work was supported by long-term funding from the New Zealand government's Foundation for Research Science and Technology's 'Public Good Science Fund' and Building Research Levy. The support of other funders, researchers, and the many house occupants involved in the research is also gratefully acknowledged. The authors also thank the referees and editors for their comments and suggestions.

CR Atkinson AB, 1995, INCOME DISTRIBUTION

Clark S. J., 2005, NZ 2005 HOUSE CONDIT

COLLINS K, 1986, UNH HOUS DIAGN I ENV  
 Dembkowski S., 1998, ECOMANAGEMENT AUDITI, V5, P62  
 \*DEP STAT, 1976, SURV HOUS EL CONS 19  
 \*DEP STAT, 1973, REP SURV HOUS EL CON  
 \*DIR, 2010, TOP TIPS SAV EN  
 Energy Information Administration (EIA), 2004, RES EN CONS SURV 200  
 \*ENV CANT, 2010, CLEAN HEAT PROJ  
 French LJ, 2007, ENERGBUILDINGS, V39, P770, DOI 10.1016/j.enbuild.2007.02.004  
 FRENCH LJ, 2008, P 29 AIVC C ADV BUIL  
 HOWDENCHAPMAN P, 2007, BRIT MED J ONLINE  
 HUNT SM, 1994, DOMESTIC ENERGY AFFO  
 ISAACS N, 1993, AUST J PUBLIC HEALTH, V17, P68  
 Isaacs N, 2010, ENERGY USE NZ HOUSEH  
 MACKINTOSH M, 1994, P 1994 ANN C EN EXC  
 \*MIN ENV, 2010, CLEAN AIR PROGR  
 \*NSSO, 2007, 511 NSS MIN STAT PRO  
 RAW GJ, 2001, 417 BRE  
 SANDUSKY WF, 1993, ENERGBUILDINGS, V19, P167, DOI 10.1016/0378-7788(93)90025-P  
 SCHIPPER L, 2000, INDICATORS ENERGY US  
 SIDLER O, 2000, CAMPAGNE MESURES FON  
 \*STAT NZ, 2004, STAND TABL NUMB HOUS  
 \*STAT NZ, 1984, STAND TABL NUMB HOUS  
 Stoecklein A., 2001, ENERGY USE NZ HOUSEH  
 TROTMAN R, 2008, NO1025 BEAC PATHW  
 Utley J., 2008, DOMESTIC ENERGY FACT  
 \*WHO, 2003, EXTR WEATH EV HLTH E  
 NR 28  
 TC 23  
 Z9 23  
 U1 1  
 U2 16  
 PU TAYLOR & FRANCIS LTD  
 PI ABINGDON  
 PA 4 PARK SQUARE, MILTON PARK, ABINGDON OX14 4RN, OXON, ENGLAND  
 SN 0961-3218  
 J9 BUILD RES INF  
 JI Build. Res. Informat.  
 PY 2010  
 VL 38  
 IS 5  
 BP 470  
 EP 480  
 AR PII 926033509  
 DI 10.1080/09613218.2010.494383  
 PG 11  
 WC Construction & Building Technology  
 SC Construction & Building Technology  
 GA 644HM  
 UT WOS:000281364800004  
 DA 2018-05-03  
 ER  
 PT J  
 AU Voss, K  
 Herkel, S  
 Pfafferott, J  
 Lohnert, G  
 Wagner, A

AF Voss, Karsten  
 Herkel, Sebastian  
 Pfafferott, Jens  
 Loehnert, Guenter  
 Wagner, Andreas

TI Energy efficient office buildings with passive cooling - Results and experiences from a research and demonstration programme

SO SOLAR ENERGY

LA English

DT Article

DE office buildings; energy monitoring; passive cooling; thermal comfort; user behaviour

ID BLINDS

AB To gain access to information on energy use in office buildings, the German Federal Ministry for Economy launched an intensive research and demonstration programme in 1995. In advance of the 2002 EU energy performance directive a limited primary energy coefficient of about 100 kW h m<sup>(-2)</sup> a<sup>(-1)</sup> as a goal for the complete building services technology was postulated (HVAC + lighting) for all demonstration buildings to be supported. A further condition was that active cooling be avoided. Techniques such as natural or mechanical night ventilation or heat removal by slab cooling with vertical ground pipes as well as earth-to-air heat exchangers in the ventilation system were applied. An accompanying research was established to keep track of the results and the lessons learned from about 22 demonstration buildings realized and monitored until the end of 2005. As one outcome this paper summarises the energy performance of a selection of characteristic buildings together with an overview on the summer thermal comfort situations achieved. The research program will proceed during the next five years. Detailed reports and future results may be downloaded from the internet: [www.enbaumonitor.de](http://www.enbaumonitor.de). (c) 2006 Elsevier Ltd. All rights reserved.

C1 Univ Gesamthsch Wuppertal, D-42285 Wuppertal, Germany.

Fraunhofer ISE, D-79110 Freiburg, Germany.

Solidar Planungswerkstatt, D-12163 Berlin, Germany.

Univ Karlsruhe, D-76131 Karlsruhe, Germany.

RP Voss, K (reprint author), Univ Gesamthsch Wuppertal, Pauluskirchstr 7, D-42285 Wuppertal, Germany.

EM [kvoss@uni-wuppertal.de](mailto:kvoss@uni-wuppertal.de); [herkel@ise.fraunhofer.de](mailto:herkel@ise.fraunhofer.de);

[loehnert@solidar-planungswerkstatt.de](mailto:loehnert@solidar-planungswerkstatt.de); [wagner@fbta.uni-karlsruhe.de](mailto:wagner@fbta.uni-karlsruhe.de)

CR BISCHOFF W, 2003, EXPOSITIONEN GESUNDH

BOERSTRA AC, 2003, P HLTH BUILD

BULOWHUBE H, 2000, P EUROSUN 2000 COP D

de Dear RJ, 2002, ENERG BUILDINGS, V34, P549, DOI 10.1016/S0378-7788(02)00005-1

\*DIN, 2003, 4701 DIN GERM I S 10

\*DIN, 2004, 5 DIN

\*DIN, 1946, 1946 DIN GERM I ST 2

HENNINGS D, 2004, P CFA DAGA C STRASB

HERKEL S, 2004, 9 INT PASS LUDW GERM

HOFFMANN C, P PLEA 2006 GEN SWIT

Kuhn TE, 2006, ENERG BUILDINGS, V38, P648, DOI 10.1016/j.enbuild.2005.10.002

LEIBUNDGUT H, 2000, SCHWEIZER INGENIEUR, V26, P16

Pfafferott Jens, 2004, ENHANCING DESIGN OPE

PFÄFFEROTT J, 2006, P COMF EN US BUILD W

PFÄFFEROTT J, 2005, PAL C SANT GREEC

[Anonymous], 2005, 15251 PREN

\*PREN, 2004, 14501 PREN

RAUE AK, 2004, 2K AIVC C PRAG CZECH

Reinhart C. F., 2003, Lighting Research & Technology, V35, P243, DOI 10.1191/1365782803li064oa

Reinhart CF, 2004, SOL ENERGY, V77, P15, DOI 10.1016/j.solener.2004.04.003

Santamouris M., 1997, PASSIVE COOLING BUIL

SCHOSSIG P, 2004, EUR 2004 P FREIB GER, V2, P413

Voss K., 2005, BUROGEBAUDE ZUKUNFT

VOSS K, 2006, SCHRIFTENREIHE BUNDE

Wall M, 2001, TABK013060 LUND U

Weber L., 2002, ENERGIE BUROGEBAUDEN  
ZIMMERMANN M, 2003, HDB PASSIVEN KÜHLUNG  
2002, ENERGY BUILDINGS, V34  
NR 28  
TC 23  
Z9 23  
U1 0  
U2 12  
PU PERGAMON-ELSEVIER SCIENCE LTD  
PI OXFORD  
PA THE BOULEVARD, LANGFORD LANE, KIDLINGTON, OXFORD OX5 1GB, ENGLAND  
SN 0038-092X  
J9 SOL ENERGY  
JI Sol. Energy  
PY 2007  
VL 81  
IS 3  
BP 424  
EP 434  
DI 10.1016/j.solener.2006.04.008  
PG 11  
WC Energy & Fuels  
SC Energy & Fuels  
GA 155ZD  
UT WOS:000245616600012  
DA 2018-05-03  
ER

PT B  
AU Baraka, K  
    Ghobril, M  
    Malek, S  
    Kanj, R  
    Kayssi, A  
AF Baraka, Kim  
    Ghobril, Marc  
    Malek, Sami  
    Kanj, Rouwaida  
    Kayssi, Ayman  
BE AIDabass, D  
    Romero, G  
    Orsoni, A  
    Pantelous, A  
TI Low cost Arduino/Android-based Energy-Efficient Home Automation System  
    with Smart Task Scheduling  
SO 2013 FIFTH INTERNATIONAL CONFERENCE ON COMPUTATIONAL INTELLIGENCE,  
    COMMUNICATION SYSTEMS AND NETWORKS (CICSYN)  
LA English  
DT Proceedings Paper  
CT 5th International Conference on Computational Intelligence,  
    Communication Systems and Networks (CICSyN)  
CY JUN 05-07, 2013  
CL Madrid, SPAIN  
SP IEEE UK & RI Comp Chapter, IEEE Reg 8, IEEE Reg 10, UK Simulat Soc, Asia Modelling & Simulat Soc,  
    Univ Polytechn Madrid, Univ Technol Malaysia, Univ Malaysia Pahang, Univ Sci Malaysia, Univ Malaysia  
    Sabah, Inst Technol Bandung, Machine Intelligence Res Labs, Norway Univ Sci & Technol, Nottingham  
    Trent Univ, UK European Simulat Council, European Council Modelling & Simulat, IEEE Comp Soc, IEEE  
DE Home automation; Arduino; Android; Smart scheduling; Energy management

AB In this paper, we make use of Home Automation techniques to design and implement a remotely controlled, energy-efficient and highly scalable Smart Home with basic features that safeguard the residents' comfort and security. Our system consists of a house network (sensors and appliance actuators to respectively get information from and control the house environment). As a central controller, we used an Arduino microcontroller that communicates with an Android application, our user interface. Our house network brings together both wireless Zigbee and wired X10 technologies, thus making it a cost-efficient hybrid system. Events can be programmed to be triggered under specific conditions, and this can have a great role in reducing the total energy consumed by some appliances. On the other hand, the system can suggest smart task scheduling. The scheduling algorithm we present is a heuristic for the Resource-constrained-scheduling problem (RCPSP) with hybrid objective function merging both resource-leveling and weighted completion time considerations.

C1 [Baraka, Kim; Ghobril, Marc; Malek, Sami; Kanj, Rouwaida; Kayssi, Ayman] Amer Univ Beirut, Dept Elect & Comp Engn, Beirut, Lebanon.

RP Baraka, K (reprint author), Amer Univ Beirut, Dept Elect & Comp Engn, Beirut, Lebanon.

EM kab06@aub.edu.lb; mmg17@aub.edu.lb; sam41@aub.edu.lb; rk105@aub.edu.lb;  
ayman@aub.edu.lb

OI Baraka, Kim/0000-0003-4381-4234

CR Banerjee N., AUTOMATING ENERGY MA

Banks D., 2010, HOME AUTOMATION IPHO

Brucker P, 2002, DISCRETE APPL MATH, V123, P227, DOI 10.1016/S0166-218X(01)00342-0

Brucker P, 1999, EUR J OPER RES, V112, P3, DOI 10.1016/S0377-2217(98)00204-5

Infantes Diaz J. A., 2012, WIRELESS SENSOR NETW

ElShafee A., 2012, DESIGN IMPLEMENTATIO

Gomez C., 2010, IEEE COMMUNICATIONS

Kolisch R., HEURISTIC ALGORITHMS

Nunes R. J. C., HOME AUTOMATION STEP

Petrov I., UCONTROL SOLUTIONS

Stanimirovic I., 2009, YUGOSLAV J OPERATION, V19, P2334, DOI 10.2298/YJOR09022815

Yang B., RESOURCE CONST UNPUB

Yuan J., NP HARDNESS SINGLE V

NR 13

TC 22

Z9 22

U1 0

U2 22

PU IEEE

PI NEW YORK

PA 345 E 47TH ST, NEW YORK, NY 10017 USA

BN 978-0-7695-5042-8; 978-1-4799-0587-4

PY 2013

BP 296

EP 301

DI 10.1109/CICSYN.2013.47

PG 6

WC Computer Science, Artificial Intelligence; Computer Science, Theory & Methods; Engineering, Electrical & Electronic

SC Computer Science; Engineering

GA BIA49

UT WOS:000327141600050

DA 2018-05-03

ER

PT J

AU Dlamini, NG

Cromieres, F

AF Dlamini, Ndumiso G.

Cromieres, Fabien

TI Implementing peak load reduction algorithms for household electrical

appliances

SO ENERGY POLICY

LA English

DT Article

DE Demand-side management; Household automation; Behaviour

AB Considering household appliance automation for reduction of household peak power demand, this study explored aspects of the interaction between household automation technology and human behaviour.

Given a programmable household appliance switching system, and user-reported appliance use times, we simulated the load reduction effectiveness of three types of algorithms, which were applied at both the single household level and across all 30 households. All three algorithms effected significant load reductions, while the least-to-highest potential user inconvenience ranking was: coordinating the timing of frequent intermittent loads (algorithm 2); moving period-of-day time-flexible loads to off-peak times (algorithm 1); and applying short-term time delays to avoid high peaks (algorithm 3) (least accommodating). Peak reduction was facilitated by load interruptibility, time of use flexibility and the willingness of users to forgo impulsive appliance use. We conclude that a general factor determining the ability to shift the load due to a particular appliance is the time-buffering between the service delivered and the power demand of an appliance. Time-buffering can be 'technologically inherent', due to human habits, or realised by managing user expectations. There are implications for the design of appliances and home automation systems. (C) 2012 Elsevier Ltd. All rights reserved.

C1 [Dlamini, Ndumiso G.] Kyoto Univ, Grad Sch Energy Sci, Sakyo Ku, Kyoto 6068501, Japan.

[Cromieres, Fabien] Kyoto Univ, Grad Sch Informat, Sakyo Ku, Kyoto 6068501, Japan.

RP Dlamini, NG (reprint author), Kyoto Univ, Grad Sch Energy Sci, Sakyo Ku, Kyoto 6068501, Japan.

EM ndumiso.dlamini@gmail.com; fabien.cromieres@gmail.com

CR Dickert J., 2010, MOD EL POW SYST S SE

Ha D.L., 2006, P 12 IFAC S INF CONT

Hobbs JE, 1999, CAN J AGR ECON, V47, P445, DOI 10.1111/j.1744-7976.1999.tb00442.x

The Institute of Energy Economics Japan, 2010, EDMC HDB EN EC STAT

Ilic M., 2002, P IEEE POW ENG SOC W, V1, P177

Nafziger D.L., 1996, ENERGY SUSTAINABLE D, VIII

Newsham GR, 2010, ENER POLICY, V38, P3289, DOI 10.1016/j.enpol.2010.01.027

PAETZ AG, 2011, 30 USAEE IAEE N AM C

Panasonic, 2009, PAN SEAS NVE START P

Panasonic, 2011, SMART LIF ENT HOM AR

Statistics Bureau, 2011, 2010 POP CENS PREL C

Toyota, 2010, TMC DEV ADV EN MAN S

Woo C., 1990, J REGULATORY EC, V2

[Anonymous], 2008, ECONOMIST 0415

NR 14

TC 22

Z9 22

U1 3

U2 10

PU ELSEVIER SCI LTD

PI OXFORD

PA THE BOULEVARD, LANGFORD LANE, KIDLINGTON, OXFORD OX5 1GB, OXON, ENGLAND

SN 0301-4215

J9 ENER POLICY

JI Energy Policy

PD MAY

PY 2012

VL 44

BP 280

EP 290

DI 10.1016/j.enpol.2012.01.051

PG 11

WC Economics; Energy & Fuels; Environmental Sciences; Environmental Studies

SC Business & Economics; Energy & Fuels; Environmental Sciences & Ecology

GA 926RM



UT WOS:000302848700026

DA 2018-05-03

ER

PT J

AU Berardi, U

AF Berardi, Umberto

TI A cross-country comparison of the building energy consumptions and their trends

SO RESOURCES CONSERVATION AND RECYCLING

LA English

DT Article

DE Energy consumption; Buildings; Energy saving; Building energy efficiency; Building stock; BRIC countries

ID RESIDENTIAL BUILDINGS; EFFICIENCY POLICIES; LONG-TERM; CHINA; SECTOR; DEMAND; IMPACT; INDIA; CHALLENGES; MITIGATION

AB Although it is often stated that the energy consumption in buildings accounts for more than 30% of total global final energy use, only a few studies analyze updated data about the current building energy consumptions or focus on comparing different countries. Similarly, models that predict future trends in building energy demand often use contrasting algorithms which result in diverse forecasts. Scope of this paper is to present and discuss data taken from several studies about the building energy consumptions in US, EU, and BRIC (Brazil, Russia, India, and China) countries and to provide an updated inventory of useful figures. Comparisons among countries are used to show historical, actual, and future energy consumption trends. Data presented by the World Bank, the United Nations Environment Program, the Intergovernmental Panel on Climate Change, and the International Energy Agency are compared with national reports as well as with research studies. The variety of the approaches used in each of the previous sources was considered fundamental to allow a complete review. The paper shows that the total building energy consumptions in BRIC countries have already overcome those in developed countries, and the continuous increase in the building stock of the BRIC countries creates an urgency for promoting building energy efficiency policies in these countries. At the same time, the policies actually adopted in developed countries are insufficient to guarantee a significant reduction in their building energy consumption in the years to come. In the current scenario, at least a doubling of the global energy demand in buildings compared to today's levels will occur by 2050. To avoid this forecast, cost-effective best practices and technologies as well as behavioral and lifestyle changes need to be diffused and accepted globally. (C) 2016 Elsevier B.V. All rights reserved.

C1 [Berardi, Umberto] Ryerson Univ, Fac Engn & Architectural Sci, 350 Victoria St, Toronto, ON, Canada.

RP Berardi, U (reprint author), Ryerson Univ, Fac Engn & Architectural Sci, 350 Victoria St, Toronto, ON, Canada.

EM uberardi@ryerson.ca

RI BERARDI, UMBERTO/G-1972-2017

OI BERARDI, UMBERTO/0000-0002-0508-6195

CR Broin EO, 2015, APPL ENERG, V150, P211, DOI 10.1016/j.apenergy.2015.03.063

Broin EO, 2013, ENERGY, V57, P134, DOI 10.1016/j.energy.2013.01.016

Cai WG, 2009, ENER POLICY, V37, P2054, DOI 10.1016/j.enpol.2008.11.037

Casals XG, 2006, ENER BUILDINGS, V38, P381, DOI 10.1016/j.enbuild.2005.05.004

CEBDS, 2012, BRAZ BUS COUNC SUST

Chandel SS, 2016, RENEW SUST ENER REV, V54, P1443, DOI 10.1016/j.rser.2015.10.060

Chen SQ, 2008, ENER BUILDINGS, V40, P654, DOI 10.1016/j.enbuild.2007.04.022

Chen SQ, 2013, BUILD SIMUL-CHINA, V6, P113, DOI 10.1007/s12273-013-0114-y

observatory national regulation building for energy efficiency, 2013, ONR REP

DOE, 2010, IND R D EN EFF BUILD

DOE, 2012, AN RUSS MARK BUILD E

EAA European Energy Agency, 2015, PRIM EN CONS FUEL CS

Economidou M, 2011, EUROPE BUILDINGS MI

EIA, 2014, INT EN OUTL

EIA U.S. International Energy Portal, 2016, EN INF ADM

EIA U.S. Energy Information Administration, ANN EN OUTL 2015

Enerdata,, 2010, ODYSSEE DATABASE EUR

- Eom J, 2012, ENERGY, V46, P405, DOI 10.1016/j.energy.2012.08.009
- EU European Commission, 2013, EU EN TRANSP GHG EM
- European Parliament and Council, 2010, OFF J EUR UNION L, VL153, P13
- EY, 2013, SUSTAINABLE BUILDING
- Geller H, 2004, ENER POLICY, V32, P1437, DOI 10.1016/S0301-4215(03)00122-8
- GhaffarianHoseini A, 2013, RENEW SUST ENER REV, V25, P1, DOI 10.1016/j.rser.2013.01.010
- Harvey LDD, 2009, ENER EFFIC, V2, P139, DOI 10.1007/s12053-009-9041-2
- Hong TZ, 2009, ENER BUILDINGS, V41, P426, DOI 10.1016/j.enbuild.2008.11.003
- Huang T, 2013, RESOUR CONSERV RECY, V72, P91, DOI 10.1016/j.resconrec.2012.12.013
- IEA. International Energy Agency, 2013, MOD BUILD EN COD
- IEA (International Energy Agency), 2013, TRANS SUST BUILD STR
- IEA, 2014, CO2 EM FUEL COMB
- IEA International Energy Agency., 2009, EN EFF N AM EX BUILD
- IFC World Bank, 2008, EN EFF RUSS UNT RES, P46936
- IPCC Intergovernmental Panel on Climate Change, 2014, CLIM CHANG 2014 MIT
- IPEEC, 2012, EN EFF REP BRAZ
- Johnsson F., 2011, EUROPEAN PATHWAYS PA
- Kong XF, 2012, ENER POLICY, V41, P624, DOI 10.1016/j.enpol.2011.11.024
- Koukkari H., 2011, INT J SUSTAINABLE BU, V2, P87
- Krey V, 2012, ENER ECON, V34, pS272, DOI 10.1016/j.eneco.2012.04.013
- Lang SW, 2004, ENER BUILDINGS, V36, P1191, DOI 10.1016/j.enbuild.2003.09.014
- Lenzen M, 2006, ENERGY, V31, P181, DOI 10.1016/j.energy.2005.01.009
- Levine MD, 1996, ENER POLICY, V24, P937, DOI 10.1016/S0301-4215(96)80359-4
- Li J, 2016, RENEW SUST ENER REV, V58, P1587, DOI 10.1016/j.rser.2015.12.326
- Li J, 2015, J CLEAN PROD, V90, P326, DOI 10.1016/j.jclepro.2014.11.061
- Lychuk T., 2012, ANAL RUSSIAN MARKET
- Mata E, 2013, ENER POLICY, V55, P404, DOI 10.1016/j.enpol.2012.12.023
- Mathew PA, 2015, APPL ENER, V140, P85, DOI 10.1016/j.apenergy.2014.11.042
- Mazzarella L, 2015, ENER BUILDINGS, V95, P23, DOI 10.1016/j.enbuild.2014.10.073
- Meijer F, 2012, BUILD RES INF, V36, P533
- MOC Ministry of Construction, 1993, COD BUILD THERM DES
- Morishita C., 2010, WORLD EN COUNC C
- Murata A, 2008, APPL ENER, V85, P1113, DOI 10.1016/j.apenergy.2007.05.008
- Salvalai G, 2015, RENEW SUST ENER REV, V42, P1245, DOI 10.1016/j.rser.2014.10.038
- Santamouris M, 2016, SOL ENERGY
- Sharma SS, 2010, APPL ENER, V87, P3565, DOI 10.1016/j.apenergy.2010.06.015
- Shukla P.R., 2011, SUSTAIN DEV, V21, P48
- Tulsyan A, 2013, ENER BUILDINGS, V58, P123, DOI 10.1016/j.enbuild.2012.11.015
- United Nations, 2014, WORLD URB PROSP 2014
- UN Habitat, 2010, STAT WORLDS CIT 2010
- UNHSP, 2010, CHALL SLUMS GLOB REP
- U.S. Department of Energy, 2011, ADV EN RETR GUID
- Wan KKW, 2012, APPL ENER, V97, P274, DOI 10.1016/j.apenergy.2011.11.048
- Wang T, 2015, RESOUR CONSERV RECY, V103, P205, DOI 10.1016/j.resconrec.2015.07.021
- WBCSD, 2009, EN EFF BUILD TRANSF, P67
- WBCSD, 2008, EN EFF BUILD BUS REA
- Woetzel J., 2009, PREPARING CHINAS URB
- World Bank, 2014, EN US
- Yu S, 2014, ENER POLICY, V67, P626, DOI 10.1016/j.enpol.2013.11.009
- Zhao HX, 2012, RENEW SUST ENER REV, V16, P3586, DOI 10.1016/j.rser.2012.02.049
- Zhou N., 2011, CHINAS ENERGY CARBON
- Zhou N, 2008, ENER BUILDINGS, V40, P2121, DOI 10.1016/j.enbuild.2008.06.009
- [Anonymous], 2013, ECONOMIST ACHIEVING

NR 70

TC 21

Z9 21

U1 28

U2 36

PU ELSEVIER SCIENCE BV  
 PI AMSTERDAM  
 PA PO BOX 211, 1000 AE AMSTERDAM, NETHERLANDS  
 SN 0921-3449  
 EI 1879-0658  
 J9 RESOUR CONSERV RECY  
 JI Resour. Conserv. Recycl.  
 PD AUG  
 PY 2017  
 VL 123  
 BP 230  
 EP 241  
 DI 10.1016/j.resconrec.2016.03.014  
 PG 12  
 WC Engineering, Environmental; Environmental Sciences  
 SC Engineering; Environmental Sciences & Ecology  
 GA EY0GJ  
 UT WOS:000403635900022  
 DA 2018-05-03  
 ER

PT J  
 AU Huang, H  
 Chen, L  
 Hu, E  
 AF Huang, Hao  
 Chen, Lei  
 Hu, Eric

TI A new model predictive control scheme for energy and cost savings in  
 commercial buildings: An airport terminal building case study  
 SO BUILDING AND ENVIRONMENT

LA English  
 DT Article

DE Model predictive control; Neural network model; Energy efficiency; HVAC  
 ID OPTIMAL TEMPERATURE CONTROL; NEURAL-NETWORK MODELS; THERMAL COMFORT;  
 CONTROL-SYSTEMS; PART II; UNCERTAINTY; ALGORITHM; STORAGE; MPC

AB Predictive control technology for heating, ventilation and air conditioning (HVAC) systems has been proven to be an effective way to reduce energy consumption and improve thermal comfort within buildings. Such methods rely on models to accurately predict the thermal dynamics of a specific building to achieve the optimal control. Implementing a predictive control at the building level faces several challenges, since buildings' thermal dynamics are nonlinear, time-varying, and contain several uncertainties. This paper presents a hybrid model predictive control (HMPC) scheme, which can minimise the energy and cost of running HVAC systems in commercial buildings. The proposed control framework combines a classical MPC with a neural network feedback linearisation method. The control model for the HMPC is developed using a simplified physical model, while the nonlinearity associated with HVAC process is handled independently by an inverse neural network model. To achieve the maximum energy saving, the proposed MPC integrates several advanced air-conditioning control strategies, such as an economizer control, an optimal start-stop control, and a load shifting control. This approach has been tested at the check-in hall of the T-1 building of the Adelaide Airport, through simulations and a field experiment. The merits of the proposed method compared to the existing control method are analysed from both the energy saving and cost saving points of view. The result shows that the proposed HMPC scheme performs reasonably well, and achieves a considerable amount of savings without violating thermal comfort. (C) 2015 Elsevier Ltd. All rights reserved.

C1 [Huang, Hao; Chen, Lei; Hu, Eric] Univ Adelaide, Sch Mech Engr, Adelaide, SA 5005, Australia.

RP Huang, H (reprint author), Univ Adelaide, Sch Mech Engr, Adelaide, SA 5005, Australia.

EM h.huang@adelaide.edu.au; lei.chen@adelaide.edu.au

FU Adelaide Airport Limited

FX The authors of this work would like to thank Adelaide Airport Limited

for providing financial support and the data for this study. Johnson Controls Australia Pty Ltd staff members are acknowledged for their technical help and support in conducting the field test.

- CR Afram A, 2014, BUILD ENVIRON, V72, P343, DOI 10.1016/j.buildenv.2013.11.016  
ASHRAE, 2013, 55 ASHRAE  
Avci M, 2013, ENER G BUILDINGS, V60, P199, DOI 10.1016/j.enbuild.2013.01.008  
Bengea S, 2011, IEEE DECIS CONTR P, P5137, DOI 10.1109/CDC.2011.6161302  
Botto MA, 1999, INT J CONTROL, V72, P1538, DOI 10.1080/002071799220038  
Braun JE, 2002, HVAC&R RES, V8, P73, DOI 10.1080/10789669.2002.10391290  
Braun J.E., 1990, ASHRAE T, P264  
Corbin CD, 2013, J BUILD PERFORM SIMU, V6, P159, DOI 10.1080/19401493.2011.648343  
Ferreira PM, 2012, ENER G BUILDINGS, V55, P238, DOI 10.1016/j.enbuild.2012.08.002  
Garnier A, 2014, J PROCESS CONTR, V24, P750, DOI 10.1016/j.jprocont.2013.10.005  
Goyal S., 2011, AM CONTR C ACC, P2077  
Hagan M. T., 1996, NEURAL NETWORK DESIG  
Hazyuk I, 2012, BUILD ENVIRON, V51, P379, DOI 10.1016/j.buildenv.2011.11.009  
Hazyuk I, 2012, BUILD ENVIRON, V51, P388, DOI 10.1016/j.buildenv.2011.11.008  
Henze GP, 2005, HVAC&R RES, V11, P189, DOI 10.1080/10789669.2005.10391134  
Huang H, 2012, PROCEDIA ENGINEER, V49, P142, DOI 10.1016/j.proeng.2012.10.122  
HUNT KJ, 1992, AUTOMATICA, V28, P1083, DOI 10.1016/0005-1098(92)90053-I  
irok J, 2011, APPL ENER G, V88, P3079  
Jimnez M, 2008, BUILD ENVIRON, V43, P170  
Kim SH, 2013, BUILD ENVIRON, V67, P111, DOI 10.1016/j.buildenv.2013.05.005  
Lee KH, 2008, BUILD ENVIRON, V43, P1633, DOI 10.1016/j.buildenv.2007.10.009  
LFBERG J, 2004, P CACSD C  
Ljung L., 1999, SYSTEM IDENTIFICATIO  
Lu T, 2009, NEURAL COMPUT APPL, V18, P345, DOI 10.1007/s00521-008-0185-3  
Ma JR, 2014, J PROCESS CONTR, V24, P1282, DOI 10.1016/j.jprocont.2014.06.011  
Ma Y, 2014, CONTROL SYS IN PRESS  
Ma Y., 2012, CONTROL SYSTEMS TECH, V20, P796, DOI DOI 10.1109/TCST.2011.2124461  
Ma Y., 2011, AM CONTR C ACC 2011, P2089  
Ma YD, 2012, IEEE CONTR SYST MAG, V32, P44, DOI 10.1109/MCS.2011.2172532  
Maasoumy M, 2014, ENER G BUILDINGS, V77, P377, DOI 10.1016/j.enbuild.2014.03.057  
May-Ostendorp P, 2011, BUILD ENVIRON, V46, P428, DOI 10.1016/j.buildenv.2010.08.004  
Mohammadzaheri M, 2012, ASIAN J CONTROL, V14, P1, DOI 10.1002/asjc.449  
Morel N., 2001, SOLAR ENERGY J, V21, P161  
Morosan PD, 2010, ENER G BUILDINGS, V42, P1445, DOI 10.1016/j.enbuild.2010.03.014  
Mustafaraj G, 2011, ENER G BUILDINGS, V43, P1452, DOI 10.1016/j.enbuild.2011.02.007  
Oldewurtel F, 2012, ENER G BUILDINGS, V45, P15, DOI 10.1016/j.enbuild.2011.09.022  
Prez-Lombard L., 2008, ENER G BUILDINGS, V40, p[394, 398]  
Prvara S, 2013, ENER G BUILDINGS, V56, P8  
Prvara S, 2011, ENER G BUILDINGS, V43, P564  
Ruano AE, 2006, ENER G BUILDINGS, V38, P682, DOI 10.1016/j.enbuild.2005.09.007  
Seem JE, 2010, APPL ENER G, V87, P910, DOI 10.1016/j.apenergy.2009.08.044  
Sourbron M, 2013, J BUILD PERFORM SIMU, V6, P175, DOI 10.1080/19401493.2012.680497  
Spindler HC, 2009, BUILD ENVIRON, V44, P750, DOI 10.1016/j.buildenv.2008.05.018  
Wang SW, 2000, BUILD ENVIRON, V35, P471, DOI 10.1016/S0360-1323(99)00032-3  
NR 44  
TC 21  
Z9 21  
U1 5  
U2 25  
PU PERGAMON-ELSEVIER SCIENCE LTD  
PI OXFORD  
PA THE BOULEVARD, LANGFORD LANE, KIDLINGTON, OXFORD OX5 1GB, ENGLAND  
SN 0360-1323  
EI 1873-684X  
J9 BUILD ENVIRON

JI Build. Environ.  
PD JUL  
PY 2015  
VL 89  
BP 203  
EP 216  
DI 10.1016/j.buildenv.2015.01.037  
PN 1  
PG 14  
WC Construction & Building Technology; Engineering, Environmental;  
Engineering, Civil  
SC Construction & Building Technology; Engineering  
GA CV7GO  
UT WOS:000364440600018  
DA 2018-05-03  
ER

PT J  
AU Nilsson, A  
Bergstad, CJ  
Thuvander, L  
Andersson, D  
Andersson, K  
Meiling, P

AF Nilsson, Andreas  
Bergstad, Cecilia Jakobsson  
Thuvander, Liane  
Andersson, David  
Andersson, Kristin  
Meiling, Par

TI Effects of continuous feedback on households' electricity consumption:  
Potentials and barriers

SO APPLIED ENERGY

LA English

DT Article

DE Electricity consumption; Intervention; Continuous feedback; In-home  
displays

ID ENERGY-CONSUMPTION; CONSERVATION; IMPACT

AB Two field experiments were carried out to study (a) the effects on energy savings of continuous visual feedback via in-home displays, and (b) the motives for responding or not. In study 1, 40 participants living in separate or semi-detached houses in two different towns participated. All participants received a questionnaire and a list of possible energy saving measures. Households were then randomly assigned to an experimental condition (display) or a control condition (no display). In study 2, 32 households in rented apartments participated. No significant differences between the conditions were found for either of the studies. In study 2, semi-structured interviews were conducted among nine of the households. Through an analysis of interview transcripts barriers were identified explaining why the feedback intervention was not sufficient to change behaviour and reduce consumption. The barriers experienced indicate that there is a risk of overconfidence in IHDs. For the development of energy policies and more wide-scale implementation, it is important to be aware of the potential obstacles to success. (c) 2014 Elsevier Ltd. All rights reserved.

C1 [Nilsson, Andreas; Bergstad, Cecilia Jakobsson; Andersson, Kristin] Univ Gothenburg, Dept Psychol, Gothenburg, Sweden.

[Thuvander, Liane; Meiling, Par] Chalmers, Dept Architecture, Gothenburg, Sweden.

[Andersson, David] Chalmers, Dept Phys Resource Theory, Gothenburg, Sweden.

RP Nilsson, A (reprint author), Univ Gothenburg, Dept Psychol, Gothenburg, Sweden.

EM andreas.nilsson@psy.gu.se; CJB@psy.gu.se; liane.thuvander@chalmers.se;  
david.andersson@chalmers.se; kristin.andersson@psy.gu.se;  
par.meiling@chalmers.se

RI Bergstad, Cecilia/B-2942-2016  
OI Bergstad, Cecilia/0000-0003-1574-7214  
FU Swedish Energy Agency [32320-1]; Swedish Research Council  
[421-2008-2119]  
FX This research were made possible by Grant - 32320-1 from the Swedish  
Energy Agency to the first author, and Grant 421-2008-2119 from the  
Swedish Research Council to the second author.  
CR Abrahamse W, 2005, J ENVIRON PSYCHOL, V25, P273, DOI 10.1016/j.jenvp.2005.08.002  
Andersson P, 2008, INDIVIDUELL MATNING  
Bennich P, 2009, ECEEE 2009 SUMM STUD, P1889  
BITTLE RG, 1979, J ENVIRON SYST, V9, P275, DOI 10.2190/91AA-P97G-JF92-T7EJ  
Brandon G, 1999, J ENVIRON PSYCHOL, V19, P75, DOI 10.1006/jevp.1998.0105  
Braun V., 2007, QUALITATIVE RES PSYC, V3, P77, DOI DOI 10.1191/1478088706QP0630A  
DEYOUNG R, 1993, ENVIRON BEHAV, V25, P485, DOI 10.1177/0013916593253003  
Dietz T, 2009, P NATL ACAD SCI USA, V106, P18452, DOI 10.1073/pnas.0908738106  
DWYER WO, 1993, ENVIRON BEHAV, V25, P275, DOI 10.1177/0013916593255001  
Ellegard K, 2011, APPL ENERG, V88, P1920, DOI 10.1016/j.apenergy.2010.11.019  
Energistyrelsen, 2010, EN 2010  
Gardner GT, 2008, ENVIRONMENT, V50, P12, DOI 10.3200/ENVT.50.5.12-25  
Gronhoj A, 2011, INT J CONSUM STUD, V35, P138, DOI 10.1111/j.1470-6431.2010.00967.x  
Hargreaves T, 2010, ENERG POLICY, V38, P6111, DOI 10.1016/j.enpol.2010.05.068  
HAYES SC, 1981, J APPL BEHAV ANAL, V14, P81, DOI 10.1901/jaba.1981.14-81  
Parker D, WORLD SUST EN DAYS N  
Pavlovas V., 2006, THESIS CHALMERS TEKN  
Skinner B.F., 1953, SCI HUMAN BEHAV  
Thogersen J, 2010, ENERG POLICY, V38, P7732, DOI 10.1016/j.enpol.2010.08.025  
Vassileva I, 2013, APPL ENERG, V106, P314, DOI 10.1016/j.apenergy.2013.01.059  
Vassileva I, 2012, APPL ENERG, V93, P575, DOI 10.1016/j.apenergy.2011.12.067  
Vassileva I, 2012, APPL ENERG, V90, P182, DOI 10.1016/j.apenergy.2011.05.031  
Wahlstrom A., 2010, ELANVANDNING VARDAGE  
NR 23  
TC 21  
Z9 21  
U1 4  
U2 35  
PU ELSEVIER SCI LTD  
PI OXFORD  
PA THE BOULEVARD, LANGFORD LANE, KIDLINGTON, OXFORD OX5 1GB, OXON, ENGLAND  
SN 0306-2619  
EI 1872-9118  
J9 APPL ENERG  
JI Appl. Energy  
PD JUN 1  
PY 2014  
VL 122  
BP 17  
EP 23  
DI 10.1016/j.apenergy.2014.01.060  
PG 7  
WC Energy & Fuels; Engineering, Chemical  
SC Energy & Fuels; Engineering  
GA AG2UR  
UT WOS:000335273100003  
DA 2018-05-03  
ER  
  
PT J  
AU Rahut, DB

- Das, S  
De Groote, H  
Behera, B  
AF Rahut, Dil Bahadur  
Das, Sukanya  
De Groote, Hugo  
Behera, Bhagirath  
TI Determinants of household energy use in Bhutan  
SO ENERGY  
LA English  
DT Article  
DE energy-use pattern; households; Bhutan; multinomial logit model  
ID DEVELOPING-COUNTRIES; INDIAN HOUSEHOLDS; FUEL CHOICE; RURAL INDIA;  
LADDER; CONSUMPTION; TRANSITION; COOKING; MODEL; POVERTY  
AB Using the Bhutan Living Standard Survey (BLSS) data for the year 2007, this paper attempts to identify and analyze the factors that are likely to influence household decisions when choosing a particular energy source for various uses such as lighting, cooking, and heating. A multinomial logit selection model has been applied for this identification and analysis. The results show that a household's choice of cleaner fuels for lighting, cooking, and heating is driven by level of income, age, education and gender of the household head, access to electricity, and location. Households with a better-educated or female head, those with a higher level of income, and urban households, have a higher probability of switching to the use of clean energy, while poor households, rural households and those with a low level of education are constrained by these factors to continue using dirty energy. The study shows that femaleheaded households are more likely to choose cleaner fuels, and that above all the availability of a clean and cost-effective source of energy within the proximity is an important factor in the adoption of clean energy. We combined BLSS 2003 and 2007 and conducted similar analyses and confirmed the robustness of the result. (C) 2014 Elsevier Ltd. All rights reserved.
- C1 [Rahut, Dil Bahadur] Int Maize & Wheat Improvement Ctr, CIMMYT, Addis Ababa, Ethiopia.  
[Das, Sukanya] Madras Sch Econ, Chennai 600025, Tamil Nadu, India.  
[De Groote, Hugo] Int Maize & Wheat Improvement Ctr, CIMMYT, Nairobi, Kenya.  
[Behera, Bhagirath] Indian Inst Technol, Dept Humanities & Social Sci, Kharagpur 721302, W Bengal, India.
- RP Rahut, DB (reprint author), Int Maize & Wheat Improvement Ctr, CIMMYT, Post Box 5689, Addis Ababa, Ethiopia.  
EM d.rahut@cgiar.org  
OI De Groote, Hugo/0000-0002-5081-0189  
CR Abebaw D, 2007, J DEV AREAS, P117  
Arntzen JW, 1984, BOTSWANA J AFR STUD, V4, P24  
Barnes DF, 1992, URBAN INTERFUEL SUBS  
Bruce N., 2000, B WORLD HEALTH ORGAN, V78, P1080  
Daioglou V, 2012, ENERGY, V37, P601, DOI 10.1016/j.energy.2011.10.044  
DEWEES PA, 1989, WORLD DEV, V17, P1159, DOI 10.1016/0305-750X(89)90231-3  
Ekholm T, 2010, ENER POLICY, V38, P5696, DOI 10.1016/j.enpol.2010.05.017  
Farhar BC, 1998, RENEW ENER, V15, P230, DOI 10.1016/S0960-1481(98)00164-5  
Farsi M, 2007, ENVIRON DEV ECON, V12, P757, DOI 10.1017/S1355770X07003932  
Gangopadhyay S, 2003, ACCESS POOR MODERN H  
Haverkort B., 1988, ILEIA Newsletter, V4, P3  
Heltberg R, 2000, LAND ECON, V76, P213, DOI 10.2307/3147225  
Heltberg R, 2005, ENVIRON DEV ECON, V10, P337, DOI 10.1017/S1355770X04001858  
Heltberg R, 2004, ENER ECON, V26, P869, DOI 10.1016/j.eneco.2004.04.018  
Hiemstra-van der Horst G, 2008, ENER POLICY, V36, P3333, DOI 10.1016/j.enpol.2008.05.006  
HILLS P, 1994, ENERGY, V19, P517, DOI 10.1016/0360-5442(94)90048-5  
Holdren J.P., 2000, ENERGY ENV HLTH  
HOSIER RH, 1993, ENER POLICY, V21, P454, DOI 10.1016/0301-4215(93)90035-E  
HOSIER RH, 1987, RESOUR ENER, V9, P347, DOI 10.1016/0165-0572(87)90003-X  
International Energy Agency, 2006, EN COOK DEV COUNTR  
Israel D, 2002, ECON DEV CULT CHANGE, V50, P865, DOI 10.1086/342846  
Jumbe CBL, 2011, ENER ECON, V33, P732, DOI 10.1016/j.eneco.2010.12.011

Khandker SR, 2012, ENER POLICY, V47, P1, DOI 10.1016/j.enpol.2012.02.028  
 LEACH G, 1987, BIOMASS, V12, P155, DOI 10.1016/0144-4565(87)90034-5  
 LEACH G, 1975, FOOD POLICY, V1, P62, DOI 10.1016/0306-9192(75)90009-3  
 LEACH G, 1992, ENER POLICY, V20, P116, DOI 10.1016/0301-4215(92)90105-B  
 Lhendup T, 2010, ENERGY SUSTAIN DEV, V14, P134, DOI 10.1016/j.esd.2010.04.004  
 Long J.S., 1997, REGRESSION MODELS CA  
 Luce R.D., 2012, INDIVIDUAL CHOICE BE  
 Masera OR, 2000, WORLD DEV, V28, P2083, DOI 10.1016/S0305-750X(00)00076-0  
 MCFADDEN D, 1976, ANN ECON SOC MEAS, V5, P363  
 Nansaior A, 2011, BIOMASS BIOENERG, V35, P4180, DOI 10.1016/j.biombioe.2011.06.046  
 Nepal M, 2011, ENVIRON DEV ECON, V16, P1, DOI 10.1017/S1355770X10000409  
 Onoja AO, 2012, CONSILIENCE J SUSTAI, V8, P115  
 Ouedraogo B, 2006, ENER POLICY, V34, P3787, DOI 10.1016/j.enpol.2005.09.006  
 Pachauri S, 2004, WORLD DEV, V32, P2083, DOI 10.1016/j.worlddev.2004.08.005  
 Pachauri S, 2008, ENER POLICY, V36, P4022, DOI 10.1016/j.enpol.2008.06.016  
 Pandey VL, 2011, BIOMASS BIOENERG, V35, P4724, DOI 10.1016/j.biombioe.2011.09.020  
 Rao MN, 2007, ENERGY, V32, P143, DOI 10.1016/j.energy.2006.03.012  
 Reddy BS, 2009, ENERGY, V34, P992, DOI 10.1016/j.energy.2009.01.004  
 Rehfuss E, 2006, ENVIRON HEALTH PERSP, V114, P373, DOI 10.1289/ehp.8603  
 Samuelson P. A., 2005, ECONOMICS  
 SMITH KR, 1994, ENERGY, V19, P587, DOI 10.1016/0360-5442(94)90054-X  
 Vaage K, 2000, ENER ECON, V22, P649, DOI 10.1016/S0140-9883(00)00053-0  
 Zhang J, 2011, ENERGY, V36, P4227, DOI 10.1016/j.energy.2011.04.021

NR 45

TC 21

Z9 21

U1 0

U2 11

PU PERGAMON-ELSEVIER SCIENCE LTD

PI OXFORD

PA THE BOULEVARD, LANGFORD LANE, KIDLINGTON, OXFORD OX5 1GB, ENGLAND

SN 0360-5442

EI 1873-6785

J9 ENERGY

JI Energy

PD MAY 1

PY 2014

VL 69

SI SI

BP 661

EP 672

DI 10.1016/j.energy.2014.03.062

PG 12

WC Thermodynamics; Energy & Fuels

SC Thermodynamics; Energy & Fuels

GA AJ7CZ

UT WOS:000337856100062

DA 2018-05-03

ER

FN Clarivate Analytics Web of Science

VR 1.0

PT J

AU Zografakis, N

Karyotakis, K

Tsagarakis, KP

AF Zografakis, Nikolaos

Karyotakis, Konstantinos

Tsagarakis, Konstantinos P.



TI Implementation conditions for energy saving technologies and practices  
in office buildings: Part 1. Lighting

SO RENEWABLE & SUSTAINABLE ENERGY REVIEWS

LA English

DT Review

DE Energy efficiency; Energy saving; Lighting; Office buildings; Public  
acceptance; Public awareness; Willingness to pay

ID COMPACT FLUORESCENT LAMPS; DAYLIGHT RESPONSIVE SYSTEMS; PERFORMANCE;  
CONSUMPTION; EFFICIENCY; SECTOR; ENVIRONMENT; EMISSIONS; BALLASTS;  
SUPPORT

AB This paper provides a review of lighting energy saving and energy efficiency policies and practices in office buildings. The results of a face to face survey of 685 managers of companies are presented, which give insights into the factors that have influenced them to invest in lighting saving technologies. The assessment of the available lighting technologies in use in office buildings, showed that the installation of lighting saving technologies was positively influenced by a number of parameters, such as high annual financial turnover, recently established companies and companies managed by older, highly educated and energy aware people. The acceptability of the adoption and use of new efficient lighting technologies and the willingness to pay for proposed new efficient office lighting technologies, following a technico-economic information session, were also investigated. The willingness of a manager to invest in lighting energy saving/efficient technology was positively influenced by a number of factors including when a company was located in old buildings, if it was companies affected by electricity shortages, and/or if it had a large floor area. (c) 2012 Elsevier Ltd. All rights reserved.

C1 [Tsagarakis, Konstantinos P.] Democritus Univ Thrace, Dept Environm Engn, GR-67100 Xanthi, Greece.  
[Zografakis, Nikolaos] Reg Energy Agcy Crete, Iraklion 71202, Greece.

[Karyotakis, Konstantinos] Univ Crete, Dept Econ, Rethimnon 74100, Greece.

RP Tsagarakis, KP (reprint author), Democritus Univ Thrace, Dept Environm Engn, GR-67100 Xanthi, Greece.

EM enr\_g\_bur@crete-region.gr; karyotakisk@gmail.com; kandila@her.forthnet.gr

RI Tsagarakis, Konstantinos/N-1403-2017

OI Tsagarakis, Konstantinos/0000-0003-4340-6118

FU Interreg IIIC

FX This work was financed by Interreg IIIC "Action program for Sustainable  
Strengthening Energy Efficiency and Source Saving by Sustainable Local  
Development in European Regions (ENERCY REGIO)/Subproject: Practical  
Training in Companies" where Region of Crete - Regional Energy Agency of  
Crete was a partner. Thanks are due to trine Drakaki, Irine Kritsotaki  
and Melina Mantidaki for helping in the data collection.

CR Augenbroe G, 2005, BUILD RES INF, V33, P159, DOI 10.1080/0961321042000325327

Balaras CA, 2007, BUILD ENVIRON, V42, P1298, DOI 10.1016/j.buildenv.2005.11.001

Choi AS, 2005, BUILD ENVIRON, V40, P39, DOI 10.1016/j.buildenv.2004.07.014

COM, 2006, COM2006105

[Anonymous], 2006, COM2006545

COM. Communication from the Commission to the European Parliament the Council the European  
Economic and Social Committee of the Regions Second Strategic Energy Review, 2008, SEC20082870 COM

Cowan KR, 2011, PICMET PORTL INT CTR

Dascalaki E, 2002, BUILD ENVIRON, V37, P557, DOI 10.1016/S0360-1323(02)00002-1

Dolara A., 2010, 14 INT C HARM QUAL P

Doulos L, 2008, ENERGBUILDINGS, V40, P36, DOI 10.1016/j.enbuild.2007.01.019

du Can SDR, 2008, ENERGPOLICY, V36, P1386, DOI 10.1016/j.enpol.2007.12.017

Dubois MC, 2011, ENERGBUILDINGS, V43, P2572, DOI 10.1016/j.enbuild.2011.07.001

EC, 2003, OFFICIAL J EUROPEA L, VL1, P65

EC, 2000, OFF J EUR COMMUN L, V279, P33

Eltamaly AM, 2011, P ISIE 2011 2011 IEE, P1017

Enercyregio, 2007, ACT PROGR STRENGTH E

Georgopoulou E, 2006, ENERGPOLICY, V34, P2012, DOI 10.1016/j.enpol.2005.02.002

Graeber N, 2011, LIGHT DES APPL LD A, V41, P52

Greek Government Buildings Thermal Code, 1979, OFFICIAL J GREEK GOV, V362

Hansen DM, 2010, IGH T DES APPL LD A, V40, P20

IEA, 2006, EN TECHN PERSP

IEA, 1989, EN POL PROGR IEA COU  
 IPCC, 2007, 4 ASS REP IPCC  
 Jacob B, 2009, LIGHTING RES TECHNOL, V41, P219, DOI 10.1177/1477153509339610  
 Jenkins D, 2008, ENERGBUILDINGS, V40, P874, DOI 10.1016/j.enbuild.2007.06.006  
 JOHNSON K, 1993, ENERGY, V18, P163  
 Klein MR, 2004, LECT NOTES COMPUT SC, V3183, P97  
 Kumar A, 2003, ENERGPOLICY, V31, P259, DOI 10.1016/S0301-4215(02)00038-1  
 Leaman A, 1999, BUILD RES INF, V27, P4, DOI 10.1080/096132199369615  
 Markis T, 2007, ENERGBUILDINGS, V39, P404, DOI 10.1016/j.enbuild.2006.08.006  
 MEDCLIMA, 2004, MAN EN SAV CLIM PROT  
 Menanteau P, 2000, RES POLICY, V29, P375, DOI 10.1016/S0048-7333(99)00038-4  
 MILLS E, 1991, ENERGPOLICY, V19, P266, DOI 10.1016/0301-4215(91)90151-D  
 Mortimer ND, 1998, ENERGPOLICY, V26, P615, DOI 10.1016/S0301-4215(98)00019-6  
 Murakami Y, 2007, LECT NOTES COMPUT SC, V4558, P1078  
 Ng IWH, 2002, T HONG KONG I ENG, V9, P34  
 NIELSEN B, 1993, ENERGY, V18, P211, DOI 10.1016/0360-5442(93)90105-M  
 OECD/IEA, 2006, LIGHTS LAB LOST POL, P558  
 OECD/IEA, 2002, EN POL IEA COUNTR GR, P114  
 Perez-Lombard L, 2008, ENERGBUILDINGS, V40, P394, DOI 10.1016/j.enbuild.2007.03.007  
 RAVE K, 1993, ENERGY, V18, P159, DOI 10.1016/0360-5442(93)90099-Y  
 REAC, 2006, EN SAV EST CRE UNPUB  
 SANTAMOURIS M, 1994, SOL ENERGY, V52, P59, DOI 10.1016/0038-092X(94)90081-C  
 Santamouris M, 2002, BUILD ENVIRON, V37, P575, DOI 10.1016/S0360-1323(02)00004-5  
 Savvanidou E, 2010, ENERGPOLICY, V38, P3482, DOI 10.1016/j.enpol.2010.02.021  
 Scrase JI, 2001, BUILD RES INF, V29, P51, DOI 10.1080/09613210010001150  
 Soori PK, 2011, IEEE GCC C EXH, P585  
 Tsagarakis KP, 2012, RENEW SUST ENERGEREV, V16, P3986, DOI 10.1016/j.rser.2012.03.007  
 Tsagarakis KP, 2011, RENEW SUST ENERGEREV, V15, P1335, DOI 10.1016/j.rser.2010.10.009  
 Urge-Vorsatz D, 2008, ENERGPOLICY, V36, P642, DOI 10.1016/j.enpol.2007.10.009  
 UNEP, 2007, BUILD CLIM CHANG STA  
 Van Bommel W, 2011, LIGHT ENG, V19, P5  
 Van Tichelen P, 2007, OFFICE LIGHTING PREP, P271  
 Waide P, 1997, ENERGBUILDINGS, V26, P45, DOI 10.1016/S0378-7788(96)01013-4  
 Wang N, 2011, LIGHTING RES TECHNOL, V43, P55, DOI 10.1177/1477153510370807  
 Yavuz C, 2010, LIGHT ENG, V18, P99  
 Yuen GSC, 2010, CLIN EXP OPTOM, V93, P66, DOI 10.1111/j.1444-0938.2010.00462.x  
 [Anonymous], 2008, OFF J GREEK GOVT L, V89, P1371

NR 58

TC 21

Z9 21

U1 0

U2 21

PU PERGAMON-ELSEVIER SCIENCE LTD

PI OXFORD

PA THE BOULEVARD, LANGFORD LANE, KIDLINGTON, OXFORD OX5 1GB, ENGLAND

SN 1364-0321

J9 RENEW SUST ENERGEREV

JI Renew. Sust. Energ. Rev.

PD AUG

PY 2012

VL 16

IS 6

BP 4165

EP 4174

DI 10.1016/j.rser.2012.03.005

PG 10

WC GREEN &amp; SUSTAINABLE SCIENCE &amp; TECHNOLOGY; Energy &amp; Fuels

SC Science &amp; Technology - Other Topics; Energy &amp; Fuels

GA 979YL  
 UT WOS:000306860700055  
 DA 2018-05-03  
 ER

PT J

AU Karkanias, C

Boemi, SN

Papadopoulos, AM

Tsoutsos, TD

Karagiannidis, A

AF Karkanias, C.

Boemi, S. N.

Papadopoulos, A. M.

Tsoutsos, T. D.

Karagiannidis, A.

TI Energy efficiency in the Hellenic building sector: An assessment of the restrictions and perspectives of the market

SO ENERGY POLICY

LA English

DT Article

DE Energy efficiency; Bioclimatic architecture; Sustainable building

ID SAMPLE-SIZE; GREECE; DEMAND

AB The significance of bioclimatic architecture has become widely accepted since the 1970s and the implementation of its principles in practice is a key factor in order to achieve energy efficiency in the building sector. The way, however, from scientific acceptance to commercial utilization is not a straightforward one. This paper deals with the notion of bioclimatic architecture in buildings and investigates the aspects of this concept in Hellas. A sample of university researchers, building contractors and members of public organisations was interviewed using a standardised set of guidelines. The barriers to promoting bioclimatic design, role of the local government in the adoption process, level of environmental culture as well as perspectives of this concept in Hellas were the key areas of discussion in each of the interviews. The results from the data analysis reveal insufficient economic incentives, a lack in technical information as well as a lack in specific environmental policies that would foster the propagation of bioclimatic architecture. (C) 2010 Elsevier Ltd. All rights reserved.

C1 [Karkanias, C.; Papadopoulos, A. M.; Karagiannidis, A.] Aristotle Univ Thessaloniki, Dept Mech Engr, Lab Heat Transfer & Environm Engr, GR-54124 Thessaloniki, Greece.

[Boemi, S. N.] Dept Environm & Nat Resources Management, GR-30100 Agrinion, Greece.

[Tsoutsos, T. D.] Tech Univ Crete, Dept Environm Engr, GR-19009 Khania, Greece.

RP Karkanias, C (reprint author), Aristotle Univ Thessaloniki, Dept Mech Engr, Lab Heat Transfer & Environm Engr, Box 483, GR-54124 Thessaloniki, Greece.

EM theocharis.tsoutsos@enveng.tuc.gr

RI Boemi, Sofia - Natalia/M-6139-2013

OI Boemi, Sofia - Natalia/0000-0003-3163-3495; TSOUTSOS,

THEOCHARIS/0000-0002-6411-2736; Papadopoulos, Agis/0000-0002-4470-8903

CR BEETS LM, 2008, HPAC HEATING PIPING, V80, P14

\*BREEAM, 2009, BRE ENV ASS METH

Douglas D., 2003, MANAGEMENT RES NEWS, V26, P44, DOI DOI 10.1108/01409170310783466

EDWARDS B, 1998, GREEN BUILDINGS PAYE

Glaser BG, 1967, DISCOVERY GROUNDED T

Goulding C., 2002, GROUNDED THEORY PRAC

\*HELL MIN ENV, 2001, PHYS PLANNING PUBLIC

Isaac M, 2009, ENER POLICY, V37, P507, DOI 10.1016/j.enpol.2008.09.051

Jette DU, 2003, PHYS THER, V83, P224

KARAVASSILI M, 2000, WEEKLY B

KENNEDY P, 1993, PREPARING 21 CENTURY, P185

Liaropoulos L, 2008, HEALTH POLICY, V87, P72, DOI 10.1016/j.healthpol.2007.12.005

Locke K., 2001, GROUNDED THEORY MANA

Maciel AA, 2007, BUILD ENVIRON, V42, P3762, DOI 10.1016/j.buildenv.2006.07.041

MAGLIOCCO A, 1999, REQUALIFICATION PUBL  
 Morse JM, 2000, QUAL HEALTH RES, V10, P3, DOI 10.1177/104973200129118183  
 Papadopoulos AM, 2008, ENER BUILDINGS, V40, P224, DOI 10.1016/j.enbuild.2007.02.019  
 Papadopoulos AM, 2009, INT J SUSTAIN ENERGY, V28, P29, DOI 10.1080/14786450802452423  
 PAPAPOPOULOS M, 1982, ENERGY DESIGN BUILDI, P47  
 PAPAPOPOULOS M, 1991, P 9 INT PLEA C ARCH, P487  
 Papakostas K.T., 2004, INT J SUSTAINABLE EN, V24, P19  
 Rapanos VT, 2006, ENER POLICY, V34, P3137, DOI 10.1016/j.enpol.2005.05.017  
 SANDELOWSKI M, 1995, RES NURS HEALTH, V18, P179, DOI 10.1002/nur.4770180211  
 Sardianou E, 2007, ENER POLICY, V35, P3778, DOI 10.1016/j.enpol.2007.01.020  
 SCHILD E, 1997, BAUPHYSIK PLANUNG AN  
 Schweizer-Ries P, 2008, ENER POLICY, V36, P4126, DOI 10.1016/j.enpol.2008.06.021  
 SEYFANG G, 2009, ENERGY POLI IN PRESS  
 Spanou C, 2008, INT J PUBLIC SECT MA, V21, P150, DOI 10.1108/09513550810855645  
 Staikouras P., 2004, EUROPEAN J LAW EC, V17, P373  
 Strauss A., 1998, BASICS QUALITATIVE R  
 Tsilingiridis G, 1998, ENER BUILDINGS, V28, P127, DOI 10.1016/S0378-7788(98)00017-6  
 TSOUTSOS T, 2008, EUROPEAN COMMISSION, V36  
 Tsoutsos T, 2009, ENER POLICY, V37, P1587, DOI 10.1016/j.enpol.2008.12.011  
 TURNER RK, 1993, SUSTAINABLE ENVIRONM  
 Wall M, 2006, ENER BUILDINGS, V38, P627, DOI 10.1016/j.enbuild.2005.10.005

NR 35

TC 21

Z9 21

U1 1

U2 5

PU ELSEVIER SCI LTD

PI OXFORD

PA THE BOULEVARD, LANGFORD LANE, KIDLINGTON, OXFORD OX5 1GB, OXON, ENGLAND

SN 0301-4215

J9 ENER POLICY

JI Energy Policy

PD JUN

PY 2010

VL 38

IS 6

BP 2776

EP 2784

DI 10.1016/j.enpol.2010.01.009

PG 9

WC Economics; Energy &amp; Fuels; Environmental Sciences; Environmental Studies

SC Business &amp; Economics; Energy &amp; Fuels; Environmental Sciences &amp; Ecology

GA 601JS

UT WOS:000278055700028

DA 2018-05-03

ER

PT J

AU Andrews, CJ

Krogmann, U

AF Andrews, Clinton J.

Krogmann, Uta

TI Explaining the adoption of energy-efficient technologies in US

commercial buildings

SO ENERGY AND BUILDINGS

LA English

DT Article

DE Commercial buildings; Energy efficiency; United States; Technology

diffusion; Innovation

AB This paper investigates factors explaining the adoption of energy-efficient heating, cooling, window, and lighting technologies in U.S. commercial buildings. It presents multinomial logit models of technology adoption using the 2003 Commercial Buildings Energy Consumption Survey microdata set, examining, first, fundamental building components, and, second, energy-efficient adaptations. Key findings are that the choice of fundamental building components is strongly influenced by locational factors, the activities that are expected to take place in the building, and building-specific characteristics. Lighting technologies are an exception, and are poorly explained by these factors. By contrast, energy-efficient heating, cooling, window, lighting, and control adaptations appear to share common drivers, and are more likely to be adopted in newer, larger, more energy-intensive, owner-occupied buildings. These are the buildings that can best afford the up-front costs of innovation, which is often a design-intensive process. Absent policy interventions, the energy-efficient adaptations are unlikely to diffuse rapidly to the rest of the commercial building stock. (C) 2008 Elsevier B.V. All rights reserved.

C1 [Andrews, Clinton J.] Rutgers State Univ, Edward J Bloustein Sch Planning & Publ Policy, New Brunswick, NJ 08901 USA.

[Krogmann, Uta] Rutgers State Univ, Dept Environm Sci, New Brunswick, NJ 08901 USA.

RP Andrews, CJ (reprint author), Rutgers State Univ, Edward J Bloustein Sch Planning & Publ Policy, 33 Livingston Ave 302, New Brunswick, NJ 08901 USA.

EM cja1@rutgers.edu

OI Andrews, Clinton/0000-0002-2989-8091

FU National Science Foundation [CMS-0424625, CMMI-0725503]

FX This research was supported by National Science Foundation grants CMS-0424625 and CMMI-0725503.

CR ANDREWS CJ, ENERGY POLI IN PRESS

CROSBIE MJ, 2000, COMMERCIAL HIGH PERF

EIA, 2006, COMM BUILD EN CONS S

Geroski PA, 2000, RES POLICY, V29, P603, DOI 10.1016/S0048-7333(99)00092-X

HAMLIN T, ARCHITECTURE AGES, P16

Long J.S., 1997, REGRESSION MODELS CA

Rogers EM, 1995, DIFFUSION INNOVATION

Sullivan L. H., TALL OFFICE BUILDING

\*UCLA, 2008, AC TECHN SERV STAT C

Vale Brenda, 2000, NEW AUTONOMOUS HOUSE

Venturi Robert, 1972, LEARNING LAS VEGAS

WOTTEN H, ELEMENTS ARCHITECTUR

NR 12

TC 21

Z9 21

U1 0

U2 12

PU ELSEVIER SCIENCE SA

PI LAUSANNE

PA PO BOX 564, 1001 LAUSANNE, SWITZERLAND

SN 0378-7788

J9 ENERG BUILDINGS

JI Energy Build.

PD MAR

PY 2009

VL 41

IS 3

BP 287

EP 294

DI 10.1016/j.enbuild.2008.09.009

PG 8

WC Construction & Building Technology; Energy & Fuels; Engineering, Civil

SC Construction & Building Technology; Energy & Fuels; Engineering

GA 411PZ

UT WOS:000263663100004

DA 2018-05-03  
ER

PT J

AU Parnell, R  
Larsen, OP

AF Parnell, R  
Larsen, OP

TI Informing the development of domestic energy efficiency initiatives an  
everyday - An everyday householder-centered framework

SO ENVIRONMENT AND BEHAVIOR

LA English

DT Article

DE domestic energy efficiency; information program; self-interest; energy  
knowledge; cognitive capacity

ID ENVIRONMENTALLY RESPONSIBLE BEHAVIOR; CONSERVATION; PERSPECTIVE;  
PARTICIPATION; INFORMATION; PSYCHOLOGY; BARRIERS; VALUES

AB This article challenges the assumptions of the techno-economic paradigm that has dominated U.K. energy policy and associated domestic energy efficiency programs since the 1970s. The process of development of an alternative conceptual framework, the everyday householder-centered approach, is described. The study began with semistructured interviews with domestic energy efficiency program providers, the results of which guided a subsequent literature review. The developed framework was structured around three core traits of the everyday householder in the context of information and advice programs for domestic energy efficiency: self-interest, energy knowledge, and cognitive capacity. The conceptual framework is presented for practical application in guiding the development of effective information and advice-focused domestic energy efficiency programs.

C1 Univ Sheffield, Sch Architecture, Sheffield S10 2TN, S Yorkshire, England.

RP Parnell, R (reprint author), Univ Sheffield, Sch Architecture, Sheffield S10 2TN, S Yorkshire, England.

EM r.parnell@sheffield.ac.uk

CR ANDERSON CD, 1982, J CONSUM RES, V9, P163, DOI 10.1086/208909

ARONSON E., 1983, J ENVIRON SYST, V12, P219, DOI DOI 10.2190/UBD5-4Y9B-61EF-WUM6

BANKS N, 1999, CASUAL MODELS HOUSEH

BANKS N, 1999, GREEN FUTURES, V17, P42

Bator RJ, 2000, J SOC ISSUES, V56, P527, DOI 10.1111/0022-4537.00182

\*BJM RES CONS LTD, 1999, 1998 EN EFF ADV CENT

Bryman A., 2001, SOCIAL RES METHODS

COLTRANE S, 1986, ENERG POLICY, V14, P133, DOI 10.1016/0301-4215(86)90124-2

Constanzo M., 1986, AM PSYCHOL, V41, P521

COOK SW, 1981, J SOC ISSUES, V37, P73, DOI 10.1111/j.1540-4560.1981.tb02627.x

Corraliza JA, 2000, ENVIRON BEHAV, V32, P832, DOI 10.1177/00139160021972829

Cowan R.S., 1985, SOCIAL SHAPING TECHN, P202

DARBY S, 1999, ENERGY ADVICE IS IT

De Young R, 2000, J SOC ISSUES, V56, P509, DOI 10.1111/0022-4537.00181

DENNIS ML, 1990, AM PSYCHOL, V45, P1109, DOI 10.1037/0003-066X.45.10.1109

\*DEP ENV, 1996, PROV EN ADV HOUS GUI

\*DEP ENV, 1996, EN EFF

\*DEP ENV, 1994, 1993 SURV PUBL ATT E

\*DEP ENV FOOD RUR, 2003, UK FUEL POV STRAT 1

Department of the Environment Transport and the Regions, 2000, ENGL HOUS COND SURV

[Anonymous], 2002, EN CONS UK

Department of Trade and Industry, 2003, UK EN SECT IND 2003

\*DEP TRANSP LOC GO, 2001, REP 2000 1 SURV ENGL

DEYOUNG R, 1989, J ENVIRON SYST, V18, P341

DEYOUNG R, 1993, ENVIRON BEHAV, V25, P484

DWYER WO, 1993, ENVIRON BEHAV, V25, P275, DOI 10.1177/0013916593255001

\*EN SAV TRUST, 2001, REV EN POL SUBM EN S

Ester P. A., 1982, J ENVIRON SYST, V11, P201

GELLER ES, 1995, ENVIRON BEHAV, V27, P184, DOI 10.1177/0013916595272004

Green J., 1998, ADVICE ACTION EVALUA  
 GUAGNANO GA, 1995, ENVIRON BEHAV, V27, P699, DOI 10.1177/0013916595275005  
 Harrison CM, 1996, GLOBAL ENVIRON CHANG, V6, P215, DOI 10.1016/0959-3780(96)00016-7  
 Hedges A, 1991, ATTITUDES ENERGY CON  
 \*HM TREAS, 2002, EC INSTR IMPR HOUS E  
 \*HOUS EN EFF BEST, 2002, HOUS ISS  
 \*J ROWNTR FDN, 1998, EFF EN ADV TEN  
 Kaplan R., 1982, COGNITION ENV FUNCTI  
 Kaplan S, 2003, AM J PUBLIC HEALTH, V93, P1484, DOI 10.2105/AJPH.93.9.1484  
 Kaplan S, 2000, J SOC ISSUES, V56, P491, DOI 10.1111/0022-4537.00180  
 KAPLAN S, 1990, COMING OF AGE : EDRA 21/1990, P19  
 KAPLAN S, 1989, J SOC ISSUES, V45, P59, DOI 10.1111/j.1540-4560.1989.tb01533.x  
 Karp DG, 1996, ENVIRON BEHAV, V28, P111, DOI 10.1177/0013916596281006  
 Katzev R. D., 1987, PROMOTING ENERGY CON  
 KEARNEY AR, 1994, CLIMATIC CHANGE, V27, P419, DOI 10.1007/BF01096270  
 KEMPTON W, 1991, GLOBAL ENVIRON CHANG, V1, P183, DOI 10.1016/0959-3780(91)90042-R  
 KEMPTON W, 1982, ENERGY, V7, P817, DOI 10.1016/0360-5442(82)90030-5  
 LUTZENHISER L, 1993, ANNU REV ENERGENV, V18, P243  
 LUTZENHISER L, 1999, P AM COUNC EN EFF EC  
 Macnaghten P, 1997, GLOBAL ENVIRON CHANG, V7, P5, DOI 10.1016/S0959-3780(96)00023-4  
 \*OFF DEP PRIM MIN, 2003, REF BUYING SELL PROC  
 OLSEN ME, 1981, J SOC ISSUES, V37, P109  
 PARNELL R, 2003, THESIS U SHEFFIELD S  
 PERLOFF R, 1987, AM PSYCHOL, V42, P3, DOI 10.1037/0003-066X.42.1.3  
 Royal Commission on Environmental Pollution, 2000, EN CHANG CLIM  
 \*ROYAL I CHART SUR, 1996, REAL COST POOR HOM C  
 SADLER R, 1998, ENERGY EFFICIENCY RE  
 SALVAGE A, 1992, ENERGY WISE ELDERLY  
 Schwartz S.H., 1970, ALTRUISM HELP BEHAV, P127  
 Schwartz S. H., 1977, ADV EXPT SOCIAL PSYC, V10, P221, DOI [DOI 10.1016/S0065-2601(08)60358-5,  
 10.1016/S0065-2601(08)60358-5]  
 \*SEL COMM ENV TRAN, 2000, 5 SEL COMM ENV TRANS  
 SHOVE E, 1995, ESF TERM WORKSH CONS  
 Shove E, 1997, ENERGY KNOWLEDGES  
 SHOVE E, 1991, FILLING GAP SOCIAL E  
 SHOVE E, 1995, GAPS BARRIERS CONCEP  
 SHOVE E, 2000, SOCIOLOGY ENERGY BUI  
 SHOVE E, 1997, ESF TERM WORKSH CONS  
 SHOVE E, 1999, ENERGY POLICY IT FOR  
 Spaargaren G., 2000, ENVIRON POLIT, P50, DOI DOI 10.1080/09644010008414512  
 Staats H, 2004, ENVIRON BEHAV, V36, P341, DOI 10.1177/0013916503260163  
 Staats HJ, 1996, J ENVIRON MANAGE, V46, P189, DOI 10.1006/jema.1996.0015  
 Stern PC, 2000, J SOC ISSUES, V56, P407, DOI 10.1111/0022-4537.00175  
 STERN PC, 1993, ENVIRON BEHAV, V25, P322, DOI 10.1177/0013916593255002  
 STERN PC, 1992, AM PSYCHOL, V47, P1224, DOI 10.1037//0003-066X.47.10.1224  
 Strauss L. A., 1998, BASICS QUALITATIVE R  
 UTLEY JI, 2001, DOMESTIC ENERGY FACT  
 WARDE A, 1998, TERM WORKSH CONS EV  
 WEBER C, 1999, EC SOCIOPSYCHOL MODE  
 Wilk R, 2002, GLOBAL ENVIRON CHANG, V12, P5, DOI 10.1016/S0959-3780(01)00028-0  
 YATES SM, 1983, AM PSYCHOL, V38, P435, DOI 10.1037/0003-066X.38.4.435  
 Zelezny LC, 2000, J SOC ISSUES, V56, P365, DOI 10.1111/0022-4537.00172

NR 80

TC 21

Z9 21

U1 0

U2 9

PU SAGE PUBLICATIONS INC

PI THOUSAND OAKS  
 PA 2455 TELLER RD, THOUSAND OAKS, CA 91320 USA  
 SN 0013-9165  
 J9 ENVIRON BEHAV  
 JI Environ. Behav.  
 PD NOV  
 PY 2005  
 VL 37  
 IS 6  
 BP 787  
 EP 807  
 DI 10.1177/0013916504274008  
 PG 21  
 WC Environmental Studies; Psychology, Multidisciplinary  
 SC Environmental Sciences & Ecology; Psychology  
 GA 975BM  
 UT WOS:000232636000003  
 DA 2018-05-03  
 ER

PT J

AU Kolokotsa, D  
 Santamouris, M  
 AF Kolokotsa, D.  
 Santamouris, M.

TI Review of the indoor environmental quality and energy consumption  
 studies for low income households in Europe

SO SCIENCE OF THE TOTAL ENVIRONMENT

LA English

DT Review

DE Energy poverty; Low income households; Indoor environmental quality;  
 Energy consumption

ID THERMAL COMFORT; EFFICIENT REFURBISHMENT; FUEL POVERTY; LUNG-CANCER;  
 COLD HOMES; TEMPERATURES; HEALTH; ENGLAND; IMPROVEMENTS; DWELLINGS

AB The term energy poverty is used to describe a situation of a household not able to satisfy socially and materially the required levels of its energy services. Energy and fuel poverty is an increasing problem in the European Union. Although the specific conditions vary from country to country the drivers defining fuel and energy poverty are similar in all Europe. This paper aims to present the state of the art regarding the energy demand and indoor environmental quality of low income households in Europe. The characteristics of this specific population group are presented including details on the specific energy consumption, the indoor comfort and finally the impact of the specific living conditions on the occupants' health. (C) 2015 Elsevier B.V. All rights reserved.

C1 [Kolokotsa, D.] Tech Univ Crete, Xania, Greece.

[Santamouris, M.] Cyprus Inst, Nicosia, Cyprus.

[Santamouris, M.] Univ Athens, Dept Phys, Grp Bldg Environm Studies, GR-10679 Athens, Greece.

RP Kolokotsa, D (reprint author), Environm Engn Sch, Xania 73100, Crete, Greece.

EM dkolokotsa@enveng.tuc.gr

OI Santamouris, Matthaios/0000-0001-6076-3526; Kolokotsa,  
 Dionysia/0000-0003-2960-3772

CR Akbari H., 2001, CHARACTERIZING FABRI

Akbari H, 2008, ADV BUILD ENERGY RES, V2, P1, DOI 10.3763/aber.2008.0201

Alevizos S., 2013, 2013 AIVC C ATH

Atwater H.A., 2011, IEEE PHOT SPEC C, P1

Aynsley R, 2012, ARCHIT SCI REV, V55, P15, DOI 10.1080/00038628.2011.641737

Baccini M, 2008, EPIDEMIOLOGY, V19, P711, DOI 10.1097/EDE.0b013e318176bfcd

Barreiro J, 2005, APPL ECON, V37, P1233, DOI 10.1080/0003684050123234

Bartusch C, 2014, APPL ENERG, V125, P39, DOI 10.1016/j.apenergy.2014.03.054

Bezaee A, 2013, BUILD ENVIRON, V65, P1, DOI 10.1016/j.buildenv.2013.03.011



- Bilger M, 2013, J HEALTH ECON, V32, P1, DOI 10.1016/j.jhealeco.2012.09.010
- Blecich P., 2011, 30 ISES BIENN SOL WO, V3
- Boardman B, 1991, FUEL POVERTY COLD HO
- Bouzarovski S., 2011, DG REG WORKSH COH PO
- Bowler DE, 2010, LANDSCAPE URBAN PLAN, V97, P147, DOI 10.1016/j.landurbplan.2010.05.006
- BROWN P, 1995, ENVIRON RES, V69, P15, DOI 10.1006/enrs.1995.1021
- Brunner K, 2011, FUEL POVERTY CASE ST, P2057
- Brunner KM, 2012, ENER POLICY, V49, P53, DOI 10.1016/j.enpol.2011.11.076
- Burholt V, 2006, ENER POLICY, V34, P1198, DOI 10.1016/j.enpol.2004.09.009
- Burton S, 2004, P 25 AIVC C
- Chuang JC, 1999, J EXPO ANAL ENV EPID, V9, P85, DOI 10.1038/sj.jea.7500003
- CIBSE, 2006, GUID ENV DES
- Mengolini A., 2013, SMART GRID PROJRCTS
- Critchley R, 2007, APPL ENER, V84, P147, DOI 10.1016/j.apenergy.2006.06.001
- de Dear R, 1998, ASHRAE T, V104, P1
- De Melo A.C.M., 2005, 22 INT C PLEA 2005 P, V1, P111
- Druckman A, 2008, ENER POLICY, V36, P3177, DOI 10.1016/j.enpol.2008.03.021
- Duncan J., 2005, BUDAPEST BISHKEK MAP
- Edwards L, 2002, LIT REV EFFECTS NATU
- Eicker U, 2010, APPL ENER, V87, P2031, DOI 10.1016/j.apenergy.2009.11.015
- Evans GW, 2002, ANNU REV PUBL HEALTH, V23, P303, DOI 10.1146/annurev.publhealth.23.112001.112349
- Ezratty V., 2011, IEA WORKSH EV COB IO
- Firth S., 2007, 3 ANN M NETW COMF EN
- Firth S.K., 2008, INVESTIGATION THERM, P27
- Geros V, 1999, ENER BUILDINGS, V29, P141, DOI 10.1016/S0378-7788(98)00056-5
- Gesundheit U., 2009, GESUNDHEIT SOZIALE L
- Gilbertson J, 2012, ENER POLICY, V49, P122, DOI 10.1016/j.enpol.2012.01.053
- GOLNESHAN AA, 1990, ENER BUILDINGS, V14, P201, DOI 10.1016/0378-7788(90)90043-I
- Gordon D, 2000, POVERTY SOCIAL EXCLU
- Grosche P, 2010, ENER POLICY, V38, P93, DOI 10.1016/j.enpol.2009.08.056
- Healy JD, 2004, ENER POLICY, V32, P207, DOI 10.1016/S0301-4215(02)00265-3
- Healy J. D., 2002, ENV STUDIES RES SERI, V2002
- Herrero ST, 2010, FUEL POVERTY HUNGARY
- Ho SH, 2009, APPL THERM ENG, V29, P1648, DOI 10.1016/j.applthermaleng.2008.07.015
- HOLGERSSON M, 1984, BUILD ENVIRON, V19, P121, DOI 10.1016/0360-1323(84)90037-4
- Hong SH, 2006, ENER BUILDINGS, V38, P1171, DOI 10.1016/j.enbuild.2006.01.007
- Hong SH, 2009, BUILD ENVIRON, V44, P1228, DOI 10.1016/j.buildenv.2008.09.003
- HUNT DRG, 1982, BUILD ENVIRON, V17, P107, DOI 10.1016/0360-1323(82)90048-8
- Hutchinson EJ, 2006, APPL ENER, V83, P1198, DOI 10.1016/j.apenergy.2006.01.007
- Kavgic M, 2012, ENER BUILDINGS, V47, P506, DOI 10.1016/j.enbuild.2011.12.027
- Kohlhuber M, 2006, ENVIRON RES, V101, P246, DOI 10.1016/j.envres.2005.09.008
- Kolokotroni M., 2001, ASHRAE T, V107, P479
- Kolokotsa D, 2012, SOL ENERGY, V86, P1648, DOI 10.1016/j.solener.2012.02.032
- Kryter K. D., 1985, EFFECTS NOISE MAN
- Lampietti J., 2002, HEAT IS LAXURY HELPI
- Lapillonne B., 2012, ENERGU EFFUECIENY BU
- Lavelle M, 2010, NATL GEOGRAPHIC NEWS
- Holt A., 2012, IEE PES INN SMART GR
- Liddell C, 2010, ENER POLICY, V38, P2987, DOI 10.1016/j.enpol.2010.01.037
- Lomas KJ, 2013, BUILD RES INF, V41, P259, DOI 10.1080/09613218.2013.757886
- MANTEL N, 1993, JAMA-J AM MED ASSOC, V270, P1689, DOI 10.1001/jama.1993.03510140049015
- Maragogiannis K., 2011, 52 INT SCI C RIG TEC
- Mavrogianni A, 2010, OPEN HOUSE INT, V35, P49
- Mielck A, 2002, GESUNDHEITSWESEN, V64, P405, DOI 10.1055/s-2002-32815
- Abedi A., 2007, P 3 IASTED AS C POW, P422
- Oreszczyn T, 2006, ENER BUILDINGS, V38, P245, DOI 10.1016/j.enbuild.2005.06.006
- Peeters L, 2009, APPL ENER, V86, P772, DOI 10.1016/j.apenergy.2008.07.011

Guertler P., 2008, MUCH COST ALLEVIATING  
 Richards K., 2001, SYNT PRED P WORKSH S, P1  
 Rohles F.H., 1983, ASHRAE T, V89, P245  
 Rohles Jr F. H., 1986, ASHRAE T 1A, V92, P288  
 Rybkowska A., 2011, HOUSING CONDITIONS E  
 Sakka A, 2012, ENERGBUILDINGS, V49, P69, DOI 10.1016/j.enbuild.2012.01.023  
 Santamouris M, 2007, ENERGBUILDINGS, V39, P859, DOI 10.1016/j.enbuild.2007.02.008  
 Santamouris M, 2011, SOL ENERGY, V85, P3085, DOI 10.1016/j.solener.2010.12.023  
 Santamouris M, 2008, INT J LOW-CARBON TEC, V3, P71, DOI 10.1093/ijlct/3.2.71  
 Santamouris M, 2013, ENERGBUILDINGS, V65, P477, DOI 10.1016/j.enbuild.2013.06.024  
 Santamouris M, 2013, ENERGBUILDINGS, V57, P74, DOI 10.1016/j.enbuild.2012.11.002  
 Santos I.P., 2012, ENERGY BUILD, V50, P290, DOI DOI 10.1016/J.ENBUILD.2012.03.052  
 Schnieders E, 2006, ENERGPOLICY, V34, P151, DOI 10.1016/j.enpol.2004.08.049  
 Shapiro G. G., 1999, HOUSE DUST MITE AVOID, V103  
 Shortt N, 2007, HEALTH PLACE, V13, P99, DOI 10.1016/j.healthplace.2005.10.004  
 Springer DA, 2005, ASHRAE TRAN, V111, P501  
 Summerfield AJ, 2007, ENERGBUILDINGS, V39, P783, DOI 10.1016/j.enbuild.2007.02.012  
 Sun YX, 2013, INDOOR BUILT ENVIRON, V22, P678, DOI 10.1177/1420326X13480373  
 Synnefa A, 2007, SOL ENERGY, V81, P488, DOI 10.1016/j.solener.2006.08.005  
 Synnefa A, 2012, ENERGBUILDINGS, V55, P35, DOI 10.1016/j.enbuild.2011.11.051  
 Taha H, 1997, ENERGBUILDINGS, V25, P99, DOI 10.1016/S0378-7788(96)00999-1  
 The European Fuel Poverty and Energy Efficiency Project, 2008, GOOD PRACTICES EXPERIENCE  
 Thiers S, 2008, SOL ENERGY, V82, P820, DOI 10.1016/j.solener.2008.02.014  
 Tonui JK, 2007, SOL ENERGY, V81, P498, DOI 10.1016/j.solener.2006.08.002  
 TRICHOPOULOS D, 1987, ENVIRON RES, V44, P169, DOI 10.1016/S0013-9351(87)80225-6  
 Wargocki P., 2013, EFFECTS OF VENTILATION  
 World Health Organization, LARG AN REV EUR HOUS  
 Wingfield J., 2008, EVALUATING IMPACT OF ENVIRONMENTAL  
 Wright A, 2005, BUILD SERV ENG RES T, V26, P285, DOI [DOI 10.1191/0143624405BT1360A, DOI 10.1191/0143624405BT1360A]  
 Yohanis YG, 2010, APPL ENERGBUILDINGS, V87, P681, DOI 10.1016/j.apenergy.2009.08.003  
 Zavadskas E, 2008, ENERGBUILDINGS, V40, P573, DOI 10.1016/j.enbuild.2007.04.015

NR 97

TC 20

Z9 20

U1 4

U2 47

PU ELSEVIER SCIENCE BV

PI AMSTERDAM

PA PO BOX 211, 1000 AE AMSTERDAM, NETHERLANDS

SN 0048-9697

EI 1879-1026

J9 SCI TOTAL ENVIRON

JI Sci. Total Environ.

PD DEC 1

PY 2015

VL 536

BP 316

EP 330

DI 10.1016/j.scitotenv.2015.07.073

PG 15

WC Environmental Sciences

SC Environmental Sciences &amp; Ecology

GA CR2VV

UT WOS:000361189800036

PM 26225739

DA 2018-05-03

ER

PT J

AU Battista, G  
 Evangelisti, L  
 Guattari, C  
 Basilicata, C  
 Vollaro, RD

AF Battista, Gabriele

Evangelisti, Luca  
 Guattari, Claudia  
 Basilicata, Carmine  
 Vollaro, Roberto de Lieto

TI Buildings Energy Efficiency: Interventions Analysis under a Smart Cities Approach

SO SUSTAINABILITY

LA English

DT Article

DE TRNSYS; smart environment; building efficiency; intervention efficiency

ID ICT; SUSTAINABILITY

AB Most of the world's population lives in urban areas and in inefficient buildings under the energy point of view. Starting from these assumptions, there is the need to identify methodologies and innovations able to improve social development and the quality of life of people living in cities. Smart cities can be a viable solution. The methodology traditionally adopted to evaluate building energy efficiency starts from the structure's energy demands analysis and the demands reduction evaluation. Consequently, the energy savings is assessed through a cascade of interventions. Regarding the building envelope, the first intervention is usually related to the reduction of the thermal transmittance value, but there is also the need to emphasize the building energy savings through other parameters, such as the solar gain factor and dye solar absorbance coefficients. In this contribution, a standard building has been modeled by means of the well-known dynamic software, TRNSYS. This study shows a parametrical analysis through which it is possible to evaluate the effect of each single intervention and, consequently, its influence on the building energy demand. Through this analysis, an intervention chart has been carried out, aiming to assess the intervention efficiency starting from the percentage variation of energy demands.

C1 [Battista, Gabriele; Evangelisti, Luca; Guattari, Claudia; Basilicata, Carmine; Vollaro, Roberto de Lieto] Univ Roma TRE, Dept Engn, I-00146 Rome, Italy.

RP Evangelisti, L (reprint author), Univ Roma TRE, Dept Engn, Via Vito Volterra 62, I-00146 Rome, Italy.

EM gabriele.battista@uniroma3.it; luca.evangelisti@uniroma3.it;  
 claudia.guattari@uniroma3.it; carmine.basilicata@uniroma3.it;  
 roberto.delietovollaro@uniroma3.it

OI Battista, Gabriele/0000-0001-9321-3061; Evangelisti,  
 Luca/0000-0002-9502-4309; de lieto vollaro, roberto/0000-0002-1010-2313

CR Agnoli S., 2011, RDS2011132 ENEA

Baldinelli G, 2014, ENER BUILDINGS, V79, P114, DOI 10.1016/j.enbuild.2014.05.010

Ballarini I, 2012, ENER BUILDINGS, V52, P168, DOI 10.1016/j.enbuild.2012.06.004

Cohen G, 2002, TELECOMMUN POLICY, V26, P31, DOI 10.1016/S0308-5961(01)00052-0

Forghieri C., 2013, PARADIGMA SMART CITY

GhaffarianHoseini A, 2013, RENEW SUST ENER REV, V24, P593, DOI 10.1016/j.rser.2013.02.032

Girard LF, 2013, SUSTAINABILITY-BASEL, V5, P4329, DOI 10.3390/su5104329

Grabot B, 2014, COMPUT IND, V65, P383, DOI 10.1016/j.compind.2014.01.016

Lazaroiu GC, 2012, ENERGY, V47, P326, DOI 10.1016/j.energy.2012.09.028

Mitalas G. P., 2014, ASHRAE J, V12, P54

Neirotti P, 2014, CITIES, V38, P25, DOI 10.1016/j.cities.2013.12.010

Paroutis S, 2014, TECHNOL FORECAST SOC, V89, P262, DOI 10.1016/j.techfore.2013.08.041

Ruggiero G., 2013, GUIDA PRATICA RIQUAL

[Anonymous], 77302006 UNI EN ISO

Calvesi M., 2014, ENERGY PROCEDIA, V48, P1459

Vollaro RD, 2014, ENRGY PROCED, V45, P731, DOI 10.1016/j.egypro.2014.01.078

Vollaro RD, 2014, ENRGY PROCED, V45, P372, DOI 10.1016/j.egypro.2014.01.040

Yamagata Y, 2013, APPL ENER, V112, P1466, DOI 10.1016/j.apenergy.2013.01.061

NR 18  
TC 20  
Z9 20  
U1 1  
U2 58  
PU MDPI AG  
PI BASEL  
PA POSTFACH, CH-4005 BASEL, SWITZERLAND  
SN 2071-1050  
J9 SUSTAINABILITY-BASEL  
JI Sustainability  
PD AUG  
PY 2014  
VL 6  
IS 8  
BP 4694  
EP 4705  
DI 10.3390/su6084694  
PG 12  
WC GREEN & SUSTAINABLE SCIENCE & TECHNOLOGY; Environmental Sciences;  
Environmental Studies  
SC Science & Technology - Other Topics; Environmental Sciences & Ecology  
GA AO1UG  
UT WOS:000341099800001  
OA gold  
DA 2018-05-03  
ER

PT B  
AU Wei, CY  
Li, YZ  
AF Wei, Chuyuan  
Li, Yongzhen  
GP IEEE  
TI Design of Energy Consumption Monitoring and Energy-saving Management  
System of Intelligent Building based on the Internet of Things  
SO 2011 INTERNATIONAL CONFERENCE ON ELECTRONICS, COMMUNICATIONS AND CONTROL  
(ICECC)  
LA English  
DT Proceedings Paper  
CT IEEE International Conference on Electronics, Communications and Control  
(ICECC)  
CY SEP 09-11, 2011  
CL Ningbo, PEOPLES R CHINA  
SP IEEE, Ningbo Univ, Key Lab Sci & Tech Natl Def (KLSTND)  
DE Building energy-saving; Intelligent Building; Wireless sensor network;  
Internet of things

AB for people improving the energy-saving performances of buildings, the applications of information communication, computer network, automation control and etc. are the current building energy-saving technologies. They form with a serial of technique measures for buildings with energy management systems running implementation and intelligent monitoring. This paper introduces and analyzes the information technology in building energy-saving. For building energy-saving on the demand for intelligent building energy monitoring, this paper proposed a system framework of Building Energy Monitoring and Analysis System based on the Internet of things, which has some enlightening in Building energy consumption further to achieve real-time monitoring and control, and improve the energy-saving of intelligent building.

C1 [Wei, Chuyuan; Li, Yongzhen] Beijing Inst Civil Engn & Architecture, Dept Comp Teaching & Network Informat, Beijing, Peoples R China.

RP Wei, CY (reprint author), Beijing Inst Civil Engr & Architecture, Dept Comp Teaching & Network Informat, Beijing, Peoples R China.

EM weicy@bucea.edu.cn; liyongzhen@bucea.edu.cn

CR Castellani Angelo P., 2011, IEEE INT C PERV COMP, P673

Kang Yanbing, 2003, CHINESE ENERGY, P18

The Ministry of housing and Urban- Rural Development, 2009, SOFTW DEV GUID STAT

Yang Xie, 2007, BUILDING ELECT, P25

Xu lei, DIGITAL TECHNOLOGY A, P38

Zhang gongzhong, 2011, INTELLIGENT BUILDING, P2011

NR 6

TC 20

Z9 20

U1 0

U2 7

PU IEEE

PI NEW YORK

PA 345 E 47TH ST, NEW YORK, NY 10017 USA

BN 978-1-4577-0321-8

PY 2011

BP 3650

EP 3652

PG 3

WC Automation & Control Systems; Engineering, Electrical & Electronic

SC Automation & Control Systems; Engineering

GA BYG97

UT WOS:000298656803183

DA 2018-05-03

ER

PT J

AU Naji, S

Keivani, A

Shamshirband, S

Alengaram, UJ

Jumaat, MZ

Mansor, Z

Lee, M

AF Naji, Sareh

Keivani, Afram

Shamshirband, Shahaboddin

Alengaram, U. Johnson

Jumaat, Mohd Zamin

Mansor, Zulkefli

Lee, Malrey

TI Estimating building energy consumption using extreme learning machine method

SO ENERGY

LA English

DT Article

DE Energy consumption; Residential buildings; Estimation; Energy efficiency; ELM (extreme learning machine)

ID ARTIFICIAL NEURAL-NETWORKS; RESIDENTIAL BUILDINGS; THERMAL COMFORT; PREDICTION; TECHNOLOGIES; ALGORITHM; ACCURATE; SYSTEMS; WALLS

AB The current energy requirements of buildings comprise a large percentage of the total energy consumed around the world. The demand of energy, as well as the construction materials used in buildings, are becoming increasingly problematic for the earth's sustainable future, and thus have led to alarming concern. The energy efficiency of buildings can be improved, and in order to do so, their operational energy usage should be estimated early in the design phase, so that buildings are as sustainable as

possible. An early energy estimate can greatly help architects and engineers create sustainable structures. This study proposes a novel method to estimate building energy consumption based on the ELM (Extreme Learning Machine) method. This method is applied to building material thicknesses and their thermal insulation capability (K-value). For this purpose up to 180 simulations are carried out for different material thicknesses and insulation properties, using the EnergyPlus software application. The estimation and prediction obtained by the ELM model are compared with GP (genetic programming) and ANNs (artificial neural network) models for accuracy. The simulation results indicate that an improvement in predictive accuracy is achievable with the ELM approach in comparison with GP and ANN. (C) 2015 Elsevier Ltd. All rights reserved.

- C1 [Naji, Sareh; Alengaram, U. Johnson; Jumaat, Mohd Zamin] Univ Malaya, Dept Civil Engr, Fac Engr, Kuala Lumpur, Malaysia.  
 [Keivani, Afram] Islamic Azad Univ, Dept Civil Engr, Tabriz Branch, Tabriz, Iran.  
 [Shamshirband, Shahaboddin] Univ Malaya, Dept Comp Syst & Technol, Fac Comp Sci & Informat Technol, Kuala Lumpur, Malaysia.  
 [Mansor, Zulkefli] Univ Kebangsaan Malaysia, Fac Informat Sci & Technol, Res Ctr Software Technol & Management, Bangi 43600, Malaysia.  
 [Lee, Malrey] Chonbuk Natl Univ, Sch Elect & Informat Engr, Res Ctr Adv Image & Informat Technol, Jeonju 561756, ChonBuk, South Korea.
- RP Naji, S (reprint author), Univ Malaya, Dept Civil Engr, Fac Engr, Kuala Lumpur, Malaysia.; Lee, M (reprint author), Chonbuk Natl Univ, Sch Elect & Informat Engr, Res Ctr Adv Image & Informat Technol, Jeonju 561756, ChonBuk, South Korea.
- EM sareh.naji@gmail.com; mrlee@chonbuk.ac.kr
- RI engineering, @UM-2016/I-9329-2016; JUMAAT, MOHD ZAMIN/B-9138-2010; Engineering, Faculty/I-7935-2015; Shamshirband, Shahaboddin/K-2544-2013; Alengaram, U. Johnson/B-9980-2010
- OI JUMAAT, MOHD ZAMIN/0000-0002-8783-1274; Engineering, Faculty/0000-0002-4848-7052; Shamshirband, Shahaboddin/0000-0002-6605-498X; Alengaram, U. Johnson/0000-0001-6153-9999
- FU High Impact Research Grant (HIRG) [UM.C/625/HIR/VC/206]
- FX This research work is funded by High Impact Research Grant (HIRG) no. UM.C/625/HIR/VC/206 (Synthesis of Energy Redeemable Material from Local Wastes for Building).
- CR Airumyan EL, 2005, P FIN C COST ACT C12, P431  
 Allen E., 2011, FUNDAMENTALS RESIDEN, P220  
 Arets MJP, 2002, P INT C ADV BUILD TE, P1449  
 Babovic V, 2002, NORD HYDROL, V33, P331  
 Bokalders V, 2010, WHOLE BUILDING HDB H  
 Castilla M, 2013, BUILD ENVIRON, V59, P107, DOI 10.1016/j.buildenv.2012.08.012  
 Coma J., 2014, ENER EFFIC, P1  
 Ekici BB, 2009, ADV ENG SOFTW, V40, P356, DOI 10.1016/j.advengsoft.2008.05.003  
 Govindaraju RS, 2000, J HYDROL ENG, V5, P115  
 Guertin M., 2011, GREEN APPL RESIDENTI  
 Gurney K., 1997, INTRO NEURAL NETWORK  
 Gustavsson L, 2010, ENER BUILDINGS, V42, P210, DOI 10.1016/j.enbuild.2009.08.017  
 Haykin S, 1999, NEURAL NETWORKS COMP  
 Neto AH, 2008, ENER BUILDINGS, V40, P2169, DOI 10.1016/j.enbuild.2008.06.013  
 Hsu D, 2015, APPL ENER, V160, P153, DOI 10.1016/j.apenergy.2015.08.126  
 Huang GB, 2006, NEUROCOMPUTING, V70, P489, DOI 10.1016/j.neucom.2005.12.126  
 Jung HC, 2015, ENER BUILDINGS, V90, P76, DOI 10.1016/j.enbuild.2014.12.029  
 Kalogirou SA, 2000, ENERGY, V25, P479, DOI 10.1016/S0360-5442(99)00086-9  
 KARUNANITHI N, 1994, J COMPUT CIVIL ENG, V8, P201, DOI 10.1061/(ASCE)0887-3801(1994)8:2(201)  
 Kaygusuz K, 2002, RENEW ENER, V25, P431, DOI 10.1016/S0960-1481(01)00075-1  
 Kermani A., 1999, STRUCTURAL TIMBER DE, P1  
 Khu ST, 2001, J AM WATER RESOUR AS, V37, P439, DOI 10.1111/j.1752-1688.2001.tb00980.x  
 Koza JR, 1992, GENETIC PROGRAMMING  
 Kumar A, 2013, BUILD ENVIRON, V59, P635, DOI 10.1016/j.buildenv.2012.09.023  
 Liang NY, 2006, IEEE T NEURAL NETWORK, V17, P1411, DOI 10.1109/TNN.2006.880583

Makelainen P, 1999, 4 INT C STEEL AL STR  
 Mateus R, 2013, BUILD ENVIRON, V67, P147, DOI 10.1016/j.buildenv.2013.05.012  
 Mena R, 2014, ENERG BUILDINGS, V82, P142, DOI 10.1016/j.enbuild.2014.06.052  
 Mihalakakou G, 2002, ENERG BUILDINGS, V34, P727, DOI 10.1016/S0378-7788(01)00137-2  
 Mohammad Shojafar, 2015, COMM WORKSH ICCW 201  
 Murakami S, 2009, ENERG EFFIC, V2, P179, DOI 10.1007/s12053-008-9040-8  
 Naji S, 2015, ENERGY EFFICIENCY, P1  
 Naji S, 2016, RENEW SUST ENERG REV, V53, P1520, DOI 10.1016/j.rser.2015.09.062  
 Naji S, 2014, ENERG BUILDINGS, V84, P727, DOI 10.1016/j.enbuild.2014.08.009  
 RSMEANS, 2008, RES LIGHT COMM CONST  
 Smith P. F., 2005, ARCHITECTURE CLIMATE  
 Spence W. P., 1993, RESIDENTIAL FRAMING  
 Trusty W., BUILDING LIFE CYCLE  
 Tuhus-Dubrow D, 2010, BUILD ENVIRON, V45, P1574, DOI 10.1016/j.buildenv.2010.01.005  
 US Energy Information Administration (EIA), 2015, IND STAT AN  
 Wang HF, 2015, PARALLEL COMPUT, V44, P18, DOI 10.1016/j.parco.2015.02.002  
 Wang XY, 2014, NEUROCOMPUTING, V145, P90, DOI 10.1016/j.neucom.2014.05.068  
 [Anonymous], 2007, TURKEY SPECIFICATION

NR 43

TC 19

Z9 19

U1 2

U2 25

PU PERGAMON-ELSEVIER SCIENCE LTD

PI OXFORD

PA THE BOULEVARD, LANGFORD LANE, KIDLINGTON, OXFORD OX5 1GB, ENGLAND

SN 0360-5442

EI 1873-6785

J9 ENERGY

JI Energy

PD FEB 15

PY 2016

VL 97

BP 506

EP 516

DI 10.1016/j.energy.2015.11.037

PG 11

WC Thermodynamics; Energy & Fuels

SC Thermodynamics; Energy & Fuels

GA DG1PX

UT WOS:000371841100043

DA 2018-05-03

ER

PT J

AU Fan, H

MacGill, IF

Sproul, AB

AF Fan, H.

MacGill, I. F.

Sproul, A. B.

TI Statistical analysis of driving factors of residential energy demand in  
 the greater Sydney region, Australia

SO ENERGY AND BUILDINGS

LA English

DT Article

DE Energy demand; Residential household characteristics; Driving factors  
 for electricity consumption; Empirical data; Smart grid; Energy

modelling

ID NEURAL-NETWORK; ELECTRICITY LOAD; TOP-DOWN; CONSUMPTION; SECTOR; MODEL; PERFORMANCE; PROFILES; TRENDS; IMPACT

AB The residential sector represents some 30% of global electricity consumption but the underlying composition and drivers are still only poorly understood. The drivers are many, varied, and complex, including local climate, household demographics, household behaviour, building stock and the type and number of appliances. There is considerable variation across households and, until recently, often a lack of good data. This study draws upon a detailed household dataset from the Australian Smart Grid Smart City project to build a household electricity consumption model. A statistical linear regression model for household energy demand was established and tested for both individual households and regional aggregations of households. The model showed only reasonable performance in forecasting the consumption of individual households - highlighting the influence of factors beyond those surveyed - but good performance for aggregated household consumption. Models such as this would seem highly useful for a range of stakeholders including individual households trying to understand the potential implications of different choices, utilities looking to better forecast the impact of different possible residential trends and policy makers seeking to assist households in improving their energy efficiency through targeted policies and programs. Crown Copyright (C) 2015 Published by Elsevier B.V. All rights reserved.

C1 [Fan, H.; Sproul, A. B.] Univ New S Wales, Sch Photovolta & Renewable Energy Engr, Sydney, NSW 2052, Australia.

[MacGill, I. F.] Univ New S Wales, Ctr Energy & Environm Markets, Sydney, NSW 2052, Australia.

[MacGill, I. F.] Univ New S Wales, Sch Elect Engr & Telecommun, Sydney, NSW 2052, Australia.

RP Sproul, AB (reprint author), Univ New S Wales, Sch Photovolta & Renewable Energy Engr, Sydney, NSW 2052, Australia.

EM a.sproul@unsw.edu.au

FU Australian Postgraduate Award scholarship; Cooperative Research Centre for Low Carbon Living whose activities - Australian Governments Cooperative Research Centre Programme

FX Hua Fan gratefully acknowledges the financial support of an Australian Postgraduate Award scholarship, and additional scholarship support from the Cooperative Research Centre for Low Carbon Living whose activities are funded by the Australian Governments Cooperative Research Centre Programme. Special thanks go to Miss Zoe Hungerford for her editing and Jin Zhang for his statistics advice.

CR AbdelAal RE, 1997, ENERGY, V22, P1059, DOI 10.1016/S0360-5442(97)00032-7

Ai-Hamadi HM, 2005, ELECTR POW SYST RES, V74, P353

Ali A. B. M. S., 2013, DEMAND FORECASTING S, P135

Ambrose M. D., 2013, EVALUATION 5 STAR EN

ARMSTRONG JS, 1977, J MARKETING RES, V14, P396, DOI 10.2307/3150783

Aydinalp M, 2002, APPL ENERG, V71, P87, DOI 10.1016/S0306-2619(01)00049-6

Aydinalp-Koksal M, 2008, APPL ENERG, V85, P271, DOI 10.1016/j.apenergy.2006.09.012

Badran S. M., 2012, IET C BIRM

Barakat EH, 2001, INT J ELEC POWER, V23, P63, DOI 10.1016/S0142-0615(00)00035-1

Bargur J, 1981, P 3 INT C EN US MAN

Bianco V, 2009, ENERGY, V34, P1413, DOI 10.1016/j.energy.2009.06.034

BOM, 2012, AV ANN MONTHL HEAT C

Boulaire F., 2013, SUSTAIN SCI, P1

Bradford L. W. J., 2007, M V GUIDELINES MEASU

Charytoniuk W, 1998, IEEE T POWER SYST, V13, P725, DOI 10.1109/59.708572

Chavez SG, 1999, ENERGY, V24, P183

Chen J, 2013, ENERGBUILDINGS, V66, P193, DOI 10.1016/j.enbuild.2013.07.045

Chen SQ, 2011, ENERGBUILDINGS, V43, P1063, DOI 10.1016/j.enbuild.2010.09.022

Chen SQ, 2009, ENERGBUILDINGS, V41, P1347, DOI 10.1016/j.enbuild.2009.07.033

Chen V., 2014, WHAT CAN WE LEARN HI

DEWHA, 2008, EN US AUSTR RES SECT, P41

Ediger VS, 2002, ENERGBUILDINGS, V43, P473, DOI 10.1016/S0196-8904(01)00033-4

Ermis K, 2007, ENERGPOLICY, V35, P1731, DOI 10.1016/j.enpol.2006.04.015

FAN JY, 1994, IEEE T POWER SYST, V9, P988, DOI 10.1109/59.317646



Fan S., 2012, IEEE POW EN SOC GEN  
 Farzana S, 2014, ENERGBUILDINGS, V81, P161, DOI 10.1016/j.enbuild.2014.06.007  
 Filik O. B., ENERGY CONVERS MANAG, P52  
 Fischer D, 2015, ENERGBUILDINGS, V92, P170, DOI 10.1016/j.enbuild.2015.01.058  
 Friedrich L, 2014, ENERGBUILDINGS, V80, P72, DOI 10.1016/j.enbuild.2014.05.011  
 Garau G., 2013, EC MODELL  
 Giurco DP, 2010, WATER-SUI, V2, P461, DOI 10.3390/w2030461  
 Gul M., 2011, INCORPORATING EC DEM  
 HAGAN MT, 1987, IEEE T POWER SYST, V2, P785, DOI 10.1109/TPWRS.1987.4335210  
 HAIDA T, 1994, IEEE T POWER SYST, V9, P1788, DOI 10.1109/59.331433  
 Hunt LC, 2003, ENERGECON, V25, P93, DOI 10.1016/S0140-9883(02)00072-5  
 IEA, 2014, EN TECHN PERSP 2014  
 Jaramillo-Moran MA, 2013, INT J ELEC POWER, V49, P253, DOI 10.1016/j.ijepes.2013.01.019  
 Kavagic M, 2010, BUILD ENVIRON, V45, P1683, DOI 10.1016/j.buildenv.2010.01.021  
 Kumar U, 2010, ENERGY, V35, P1709, DOI 10.1016/j.energy.2009.12.021  
 Langham E., 2014, SMART GRID SMART CIT  
 Milne C. R. G., 2013, YOUR HOME AUSTR GUID  
 [Anonymous], 2010, QUALITYCOMPANION MIN  
 Mostafavi ES, 2013, ENERGBUILDINGS, V74, P548, DOI 10.1016/j.enconman.2013.06.031  
 Nogales FJ, 2002, IEEE T POWER SYST, V17, P342, DOI 10.1109/TPWRS.2002.1007902  
 ONEAL DL, 1980, IEEE T SYST MAN CYB, V10, P749  
 Paatero JV, 2006, INT J ENERGERES, V30, P273, DOI 10.1002/er.1136  
 Pears AK, 2007, FUTURES, V39, P253, DOI 10.1016/j.futures.2006.01.012  
 R Core Team, 2014, R LANG ENV STAT COMP  
 Richardson I, 2010, ENERGBUILDINGS, V42, P1878, DOI 10.1016/j.enbuild.2010.05.023  
 Rivers N, 2005, ENERGBUILDINGS, V26, P83  
 Saddler H., 2013, POWER WHY IS ELECT C  
 Sharp R., 2014, SMART GRID SMART CIT, P16  
 Sims J. C. Rod, 2010, RESIDENTIAL ENERGY W  
 Sozen A, 2005, APPL ENERGBUILDINGS, V81, P209, DOI 10.1016/j.apenergy.2004.07.001  
 Swan LG, 2011, ENERGBUILDINGS, V43, P326, DOI 10.1016/j.enbuild.2010.09.021  
 Swan LG, 2009, RENEW SUST ENERGEREV, V13, P1819, DOI 10.1016/j.rser.2008.09.033  
 Tsanas A, 2012, ENERGBUILDINGS, V49, P560, DOI 10.1016/j.enbuild.2012.03.003  
 Unakitan G, 2014, ENERGBUILDINGS, V9, P284, DOI 10.1080/15567249.2010.492379  
 Wang XM, 2010, BUILD ENVIRON, V45, P1663, DOI 10.1016/j.buildenv.2010.01.022  
 Wiesmann D, 2011, ENERGPOLICY, V39, P2772, DOI 10.1016/j.enpol.2011.02.047  
 WILLIS HL, 1984, IEEE T POWER AP SYST, V103, P561, DOI 10.1109/TPAS.1984.318745  
 Willmott CJ, 2005, CLIMATE RES, V30, P79, DOI 10.3354/cr030079  
 NR 62  
 TC 19  
 Z9 19  
 U1 5  
 U2 36  
 PU ELSEVIER SCIENCE SA  
 PI LAUSANNE  
 PA PO BOX 564, 1001 LAUSANNE, SWITZERLAND  
 SN 0378-7788  
 EI 1872-6178  
 J9 ENERGBUILDINGS  
 JI Energy Build.  
 PD OCT 15  
 PY 2015  
 VL 105  
 BP 9  
 EP 25  
 DI 10.1016/j.enbuild.2015.07.030  
 PG 17  
 WC Construction & Building Technology; Energy & Fuels; Engineering, Civil

SC Construction & Building Technology; Energy & Fuels; Engineering  
 GA CS5UG  
 UT WOS:000362143200002  
 DA 2018-05-03  
 ER

PT J

AU Leung, MC

Tse, NCF

Lai, LL

Chow, TT

AF Leung, M. C.

Tse, Norman C. F.

Lai, L. L.

Chow, T. T.

TI The use of occupancy space electrical power demand in building cooling load prediction

SO ENERGY AND BUILDINGS

LA English

DT Article

DE Building cooling load prediction; Artificial neural network; Occupants' activities

ID ARTIFICIAL NEURAL-NETWORKS; FEEDFORWARD NETWORKS; ENERGY; SIMULATION; OFFICES; BLINDS; MODELS; IMPACT

AB This paper presents an investigation into the use of occupancy space electrical power demand to mimic occupants' activities in building cooling load prediction by intelligent approach. The occupancy space electrical power demand is obtained from an intelligent networked building power monitoring system. It works as a prototype advanced metering infrastructure - a key feature in smart grid technology. The artificial neural network model adopted is the Levenberg-Marquardt algorithm. The input parameters include the usual external climatic data, hour-type/day-type and pretreated air unit operation schedule, and the occupancy space electrical power demand. The output is the electrical power demand of the building cooling system. Simulation studies are conducted for a university building in Hong Kong. The 2010 and 2011 yearly data is used to conduct simulations. The performance indices used in evaluating the prediction performance are the coefficient of correlation (R), coefficient of variation (CV) and mean absolute percentage error (MAPE). It is demonstrated that with the use of occupancy space electrical power demand as one of the model input parameters, the prediction accuracy of the building cooling load model can be improved. In summer season, the best MAPE and CV is 4.494% and 5.808% respectively for hourly prediction, and is 1.935% and 2.345% respectively for daily prediction. On daily peak cooling load prediction in summer season, the best MAPE and CV is 2.313% and 2.862% respectively. It is found that the variability in the prediction is modest in summer season. (C) 2012 Elsevier B.V. All rights reserved.

C1 [Leung, M. C.; Tse, Norman C. F.; Lai, L. L.; Chow, T. T.] City Univ Hong Kong, Div Bldg Sci & Technol, Kowloon Tong, Hong Kong, Peoples R China.

RP Leung, MC (reprint author), City Univ Hong Kong, Div Bldg Sci & Technol, 83 Tat Chee Ave, Kowloon Tong, Hong Kong, Peoples R China.

EM mc.leung@cityu.edu.hk

OI TSE, Chung Fai Norman/0000-0002-5472-2389

FU City University of Hong Kong [CityU 7002614]

FX This work was supported in full by a grant from City University of Hong Kong [Ref. No. CityU 7002614]. Weather data are obtained from Hong Kong Observatory of the Hong Kong SAR. The authors would like to thank the building facility management of City University of Hong Kong for the support and advice.

CR Abushakra B., 2001, COMPILATION DIVERSIT

[Anonymous], 2005, ASHRAE HDB EN EST MO

Aydinalp M, 2002, APPL ENERG, V71, P87, DOI 10.1016/S0306-2619(01)00049-6

Bourgeois D, 2006, ENERGBUILDINGS, V38, P814, DOI 10.1016/j.enbuild.2006.03.002

DILLON TS, 1991, INT J ELEC POWER, V13, P186, DOI 10.1016/0142-0615(91)90021-M

Office E. E., 2007, GUID EN AUD

Foster M, 2001, BUILD ENVIRON, V36, P149, DOI 10.1016/S0360-1323(99)00074-8  
 Gonzalez PA, 2005, ENER BUILDINGS, V37, P595, DOI 10.1016/j.enbuild.2004.09.006  
 HAGAN MT, 1994, IEEE T NEURAL NETWORK, V5, P989, DOI 10.1109/72.329697  
 Haldi F, 2011, J BUILD PERFORM SIMU, V4, P323, DOI 10.1080/19401493.2011.558213  
 Haldi F, 2010, J BUILD PERFORM SIMU, V3, P135, DOI 10.1080/19401490903580759  
 Haldi F, 2009, BUILD ENVIRON, V44, P2378, DOI 10.1016/j.buildenv.2009.03.025  
 HORNIK K, 1989, NEURAL NETWORKS, V2, P359, DOI 10.1016/0893-6080(89)90020-8  
 Inkarojrit V., 2005, BALANCING COMFORT OC  
 Kandil N, 2006, INT J ELEC POWER, V28, P525, DOI 10.1016/j.ijepes.2006.02.014  
 Karjalainen S, 2009, BUILD ENVIRON, V44, P1237, DOI 10.1016/j.buildenv.2008.09.002  
 Krarti M., 2000, ENERGY AUDIT BUILDIN  
 Kreider J.F., 1994, HEATING COOLING BUIL  
 Kwok SSK, 2011, ENERG CONVERS MANAGE, V52, P2555, DOI 10.1016/j.enconman.2011.02.002  
 Mahdavi A., 2009, IEWT 2009 INT EN EC, P1  
 Newsham G. R., 1995, RIGHT LIGHT, P59  
 Nicol J.F., 2001, P 7 INT IBPSA C RIO, V39, P1073  
 Page J, 2008, ENER BUILDINGS, V40, P83, DOI 10.1016/j.enbuild.2007.01.018  
 Papalexopoulos A. D., 1993, ATH POW TECH 1993 AP, P796  
 Parys F. W, 2011, J BUILD PERFORM SIMU, V4, P339  
 RABL A, 1992, ENER BUILDINGS, V19, P143, DOI 10.1016/0378-7788(92)90008-5  
 Raja IA, 2001, ENERGY BUILD, V33, P235  
 Reinhart C. F., 2003, Lighting Research & Technology, V35, P243, DOI 10.1191/1365782803li064oa  
 Reinhart CF, 2004, SOL ENERGY, V77, P15, DOI 10.1016/j.solener.2004.04.003  
 Reinhart C.F., 2001, DAYLIGHT AVAILABILIT  
 SRINIVASAN D, 1995, IEEE T POWER SYST, V10, P1897, DOI 10.1109/59.476055  
 Tabak Vincent, 2008, USER SIMULATION SPAC  
 Wang D, 2005, ENER BUILDINGS, V37, P121, DOI 10.1016/j.enbuild.2004.06.015  
 Yalcintas M, 2008, ENER BUILDINGS, V40, P2111, DOI 10.1016/j.enbuild.2008.06.008  
 Zhang GQ, 1998, INT J FORECASTING, V14, P35, DOI 10.1016/S0169-2070(97)00044-7  
 Zimmermann G., 2007, P 2007 SUMM COMP SIM, P913

NR 36

TC 19

Z9 19

U1 0

U2 19

PU ELSEVIER SCIENCE SA

PI LAUSANNE

PA PO BOX 564, 1001 LAUSANNE, SWITZERLAND

SN 0378-7788

EI 1872-6178

J9 ENER BUILDINGS

JI Energy Build.

PD DEC

PY 2012

VL 55

BP 151

EP 163

DI 10.1016/j.enbuild.2012.08.032

PG 13

WC Construction &amp; Building Technology; Energy &amp; Fuels; Engineering, Civil

SC Construction &amp; Building Technology; Energy &amp; Fuels; Engineering

GA 065MK

UT WOS:000313152400018

DA 2018-05-03

ER

PT J

AU Lanzisera, S

Nordman, B

Brown, RE

AF Lanzisera, Steven

Nordman, Bruce

Brown, Richard E.

TI Data network equipment energy use and savings potential in buildings

SO ENERGY EFFICIENCY

LA English

DT Article

DE Network equipment energy use; Ethernet energy use; IP networks; Energy efficiency

AB Network connectivity has become nearly ubiquitous, and the energy use of the equipment required for this connectivity is growing. Network equipment consists of devices that primarily switch and route Internet Protocol (IP) packets from a source to a destination, and this category specifically excludes edge devices like PCs, servers and other sources, and sinks of IP traffic. This paper presents the results of a study of network equipment energy use and includes case studies of networks in a campus, a medium commercial building, and a typical home. The total energy use of network equipment is the product of the stock of equipment in use, the power of each device, and their usage patterns. This information was gathered from market research reports, broadband market penetration studies, field metering, and interviews with network administrators and service providers. We estimate that network equipment in the USA used 18 TWh, or about 1% of building electricity, in 2008 and that consumption is expected to grow at roughly 6% per year to 23 TWh in 2012; world usage in 2008 was 51 TWh. This study shows that office building network switches and residential equipment are the two largest categories of energy use consuming 40% and 30% of the total respectively. We estimate potential energy savings for different scenarios using forecasts of equipment stock and energy use, and savings estimates range from 20% to 50% based on full market penetration of efficient technologies.

C1 [Lanzisera, Steven; Nordman, Bruce; Brown, Richard E.] Univ Calif Berkeley, Lawrence Berkeley Natl Lab, Berkeley, CA 94720 USA.

RP Lanzisera, S (reprint author), Univ Calif Berkeley, Lawrence Berkeley Natl Lab, Berkeley, CA 94720 USA.

EM smlanzisera@lbl.gov; bnordman@lbl.gov; rebrown@lbl.gov

CR Baliga J, 2009, J LIGHTWAVE TECHNOL, V27, P2391, DOI 10.1109/JLT.2008.2010142

Census, 1996, CURR POP REP PROJ NU

Cisco, 2010, CISC PROD EFF CALC

DOE, 2009, BUILD EN DAT BOOK

Federal Communication Commission (FCC), 2009, HIGH SPEED SERV INT

Hoelzle U, 2006, HIGH EFFICIENCY POWE

IEEE, 2010, IEEE 802 3AZ EN EFF

Infineon, 2009, INF ANN WORLDS 1 GIG

Kawamoto K, 2002, ENERGY, V27, P255, DOI 10.1016/S0360-5442(01)00084-6

OECD, 2008, BROADB STAT JUN 2008

OECD, 2009, BROADB SUBSCR COUNTR

OECD, 2009, BROADB SUBSCR TECHB

OECD, 2007, BROADB STAT JUN 2007

Roth K., 2001, 7289500 AD LITTL, P66

Tolly Group, 2008, 208298 TOLL GROUP

NR 15

TC 19

Z9 19

U1 0

U2 8

PU SPRINGER

PI DORDRECHT

PA VAN GODEWIJCKSTRAAT 30, 3311 GZ DORDRECHT, NETHERLANDS

SN 1570-646X

J9 ENERGF EFFIC

J1 Energy Effic.

PD MAY

PY 2012

VL 5  
 IS 2  
 BP 149  
 EP 162  
 DI 10.1007/s12053-011-9136-4  
 PG 14  
 WC GREEN & SUSTAINABLE SCIENCE & TECHNOLOGY; Energy & Fuels; Environmental  
 Studies  
 SC Science & Technology - Other Topics; Energy & Fuels; Environmental  
 Sciences & Ecology  
 GA 909ZB  
 UT WOS:000301605600001  
 DA 2018-05-03  
 ER

PT J

AU Axon, CJ  
 Bright, SJ  
 Dixon, TJ  
 Janda, KB  
 Kolokotroni, M

AF Axon, C. J.  
 Bright, S. J.  
 Dixon, T. J.  
 Janda, K. B.  
 Kolokotroni, M.

TI Building communities: reducing energy use in tenanted commercial  
 property

SO BUILDING RESEARCH AND INFORMATION

LA English

DT Article

DE asset management; commercial property; communities of practice; energy  
 management; green leases; landlords; refurbishment; research agenda;  
 socio-legal; tenants

ID STAKEHOLDERS; ENVIRONMENT; DIFFUSION; MARKET

AB Reducing energy use in tenanted commercial property requires a greater understanding of 'buildings as communities'. Tenanted commercial properties represent: (1) the divergent communities that share specific buildings; and (2) the organizational communities represented by multi-site landlord and tenant companies. In any particular tenanted space the opportunity for environmental change is mediated (hindered or enabled) through the lease. This discussion draws on theoretical and practical understandings of (1) the socio-legal relationships of landlords, tenants and their advisors; (2) the real performance of engineering building services strategies to improve energy efficiency; (3) how organizational cultures affect the ability of the sector to engage with energy-efficiency strategies; and (4) the financial and economic basis of the relationship between owners and occupiers. The transformational complexity stems from: (1) the variety of commercial building stock; (2) the number of stakeholders (solicitors, investors, developers, agents, owners, tenants and facilities managers); (3) the fragmentation within the communities of practice; and (4) leasehold structures and language. An agenda is proposed for truly interdisciplinary research that brings together both the physical and the social sciences of energy use in buildings so that technological solutions are made effective by an understanding of the way that buildings are used and communities behave.

C1 [Axon, C. J.; Kolokotroni, M.] Brunel Univ, Sch Engr & Design, London UB8 3PH, England.

[Bright, S. J.] Univ Oxford, Fac Law, Oxford OX1 3UL, England.

[Dixon, T. J.] Univ Reading, Sch Construct Management & Engr, Reading RG6 6AY, Berks, England.

[Janda, K. B.] Univ Oxford, Sch Geog & Environm, Environm Change Inst, Oxford OX1 3QY, England.

RP Axon, CJ (reprint author), Brunel Univ, Sch Engr & Design, London UB8 3PH, England.

EM colin.axon@brunel.ac.uk; susan.bright@law.ox.ac.uk;

t.j.dixon@reading.ac.uk; katy.janda@ouce.ox.ac.uk;

maria.kolokotroni@brunel.ac.uk

- RI Axon, Colin/A-6611-2012; Janda, Kathryn/C-7054-2014  
 OI Axon, Colin/0000-0002-9429-8316; Janda, Kathryn/0000-0002-2978-430X;  
 Kolokotroni, Maria/0000-0003-4478-1868; Dixon, Tim/0000-0002-4513-6337  
 FU UK Engineering and Physical Sciences Research Council; Carbon Trust's  
 Carbon Vision initiative  
 FX These are two of the projects funded by the UK Engineering and Physical  
 Sciences Research Council and Carbon Trust's Carbon Vision initiative.  
 CR Andrews CJ, 2009, ENER POLICY, V37, P541, DOI 10.1016/j.enpol.2008.09.085  
 Ball M., 1998, EC COMMERCIAL PROPER  
 Baum A., 2007, PROPERTY INVESTMENT  
 Better Buildings Partnership (BBP), 2011, OWN OCC PARTN  
 BBP, 2010, LOW CARB RETR TOOLK  
 BBP, 2009, GREEN LEAS TOOLK WOR  
 Biggart NW, 2007, AM BEHAV SCI, V50, P1070, DOI 10.1177/000274207299355  
 Bureau of National Affairs (BNA), 2010, REAL EST LAW IND REP  
 British Property Federation (BPF), 2011, LANDL EN STAT TEN EN  
 British Property Federation (BPF) and IPD, 2010, ANN LEAS REV  
 Bright S. J., 2008, CONVEYANCER, V72, P498  
 Brown JS, 1991, ORGAN SCI, V2, P40, DOI 10.1287/orsc.2.1.40  
 Bruhns H., 2011, REV ENERGY BENCHMARK  
 Building Services Research and Information Association (BSRIA), 2011, SOFT LAND  
 Carbon Trust, 2009, CTC765 CARB TRUST  
 Carbon Trust, 2005, CTC518 CARB TRUST  
 Catney P., 2008, INTERDISCIPLINARY SC, V34, P290  
 Cooke R, 2007, RENEW ENER, V32, P2320, DOI 10.1016/j.renene.2006.12.004  
 Cooremans C, 2007, P EUR COUNC EN EFF E  
 Cortese A., 2010, P AM COUNC EN EFF EC  
 Cowan D, 2006, HOUSING STUD, V21, P381, DOI 10.1080/02673030600586019  
 Cushman M., 2002, BRIT AC MAN C FAST T  
 DECC, 2009, HEAT EN SAV STRAT CO  
 Demanuele C, 2012, BUILD SERV ENG RES T, V33, P351, DOI 10.1177/0143624411416064  
 Dixon T, 2009, J PROP RES, V26, P61, DOI 10.1080/09599910903290052  
 Dixon T, 2008, J PROP INVEST FINANC, V26, P460, DOI 10.1108/14635780810908352  
 Dixon T, 2009, LAND USE POLICY, V26, pS43, DOI 10.1016/j.landusepol.2009.08.017  
 Eichholtz P., 2009, 24 U CAL EN I  
 European Commission, 2011, COM2011109 EUR COMM  
 Fuerst F., 2011, J FINANCIAL MANAGEME, V16, P1366  
 Fuerst F, 2011, ENER POLICY, V39, P6608, DOI 10.1016/j.enpol.2011.08.005  
 Guy S, 1998, INT J URBAN REGIONAL, V22, P264, DOI 10.1111/1468-2427.00139  
 Hinnells M, 2008, J PROP INVEST FINANC, V26, P541, DOI 10.1108/14635780810908389  
 HM Treasury, 2005, ENERGY EFFICIENCY IN  
 IPF, 2009, GREEN LEAS LANDL TEN  
 Investment Property Forum (IPF), 2007, UND COMM PROP INV  
 Investment Property Forum (IPF), 2009, OCC DEM SUST OFF UK  
 Jackman S, 2010, ESTATES GAZETTE 0612, P102  
 Janda K., 2002, P AM COUNC EN EFF EC, P117  
 Janda KB, 2011, ARCHIT SCI REV, V54, P15, DOI 10.3763/asre.2009.0050  
 Kats G., 2003, GREEN BUILDING COSTS  
 Kempener R, 2007, LOW ENERGY HIGH RISE  
 Kilgour R., 2009, P EUR COUNC EN EFF E  
 Kok N, 2010, ENV PERFORMANCE GLOB  
 Langley A., 2009, GREENING COMMERCIAL  
 Langley A., 2007, INCORPORATING ENV 2  
 Langley A., 2007, INCORPORATING ENV 1  
 Lave Jean, 1991, SITUATED LEARNING LE  
 Lomas KJ, 2010, BUILD RES INF, V38, P1, DOI 10.1080/09613210903350937  
 Lorenz D., 2008, SUSTAINABLE PROPERTY  
 Lutzkendorf T, 2011, BUILD RES INF, V39, P483, DOI 10.1080/09613218.2011.597206

LUTZENHISER L, 1993, ANNU REV ENER G ENV, V18, P247, DOI 10.1146/annurev.energy.18.1.247  
Lutzenhiser L, 2002, UNDERSTANDING RESPON  
Maribu KM, 2007, ENER G POLICY, V35, P4471, DOI 10.1016/j.enpol.2007.03.005  
Miller E, 2008, J PROP INVEST FINANC, V26, P552, DOI 10.1108/14635780810908398  
Nelson A., 2008, GLOBALIZATION GLOBAL  
Newell G, 2008, J PROP INVEST FINANC, V26, P522, DOI 10.1108/14635780810908370  
Nicol JF, 2009, BUILD RES INF, V37, P68, DOI 10.1080/09613210802611041  
Nishida Y, 2011, BUILD RES INF, V39, P518, DOI 10.1080/09613218.2011.596419  
Office of Long Term Planning and Sustainability (OLTPS), 2011, MOD EN AL LEAS PROV  
Oreszczyn T, 2010, BUILD RES INF, V38, P107, DOI 10.1080/09613210903265432  
Pivo G, 2008, BUILD RES INF, V36, P20, DOI 10.1080/09613210701574795  
Pivo G, 2010, J REAL ESTATE RES, V32, P243  
RICS, 2009, SUST COMM PROP VAL  
Roussac C., 2012, INT J LAW BUILT ENV, V4, P6  
Ruikar Kirti, 2009, Construction Innovation, V9, P434, DOI 10.1108/14714170910995967  
Sayce S, 2009, GREENING LEASES LAND  
Schiellerup P, 2009, ENVIRON PLANN C, V27, P801, DOI 10.1068/c08102  
Titman S., 2011, LAW DURATION REAL ES  
UNEP Finance Initiative Property Working Group, 2009, OWN TEN ENG RESP PRO  
Zboralski K., 2006, ENCY COMMUNITIES PRA, P218

NR 71

TC 19

Z9 19

U1 0

U2 18

PU TAYLOR & FRANCIS LTD

PI ABINGDON

PA 4 PARK SQUARE, MILTON PARK, ABINGDON OX14 4RN, OXON, ENGLAND

SN 0961-3218

EI 1466-4321

J9 BUILD RES INF

JI Build. Res. Informat.

PY 2012

VL 40

IS 4

SI SI

BP 461

EP 472

DI 10.1080/09613218.2012.680701

PG 12

WC Construction & Building Technology

SC Construction & Building Technology

GA 971RE

UT WOS:000306220700006

DA 2018-05-03

ER

PT J

AU Xu, PP

Chan, EHW

Visscher, HJ

Zhang, XL

Wu, ZZ

AF Xu, Pengpeng

Chan, Edwin H. W.

Visscher, Henk J.

Zhang, Xiaoling

Wu, Zezhou

TI Sustainable building energy efficiency retrofit for hotel buildings  
using EPC mechanism in China: analytic Network Process (ANP) approach

SO JOURNAL OF CLEANER PRODUCTION

LA English

DT Article

DE Building energy efficiency; Retrofit; Energy performance contracting  
(EPC); ANP

ID PERFORMANCE CONTRACTING EPC; PROJECT; SUCCESS; MODEL

AB Building Energy Efficiency Retrofit (BEER) is considered as a valuable way to improve energy efficiency of high-energy-consumption buildings. Sustainable BEER helps integrate sustainable development strategy into existing buildings and retrofit projects. To ensure BEER projects that can fulfill the sustainable development strategy, Energy Performance Contracting (EPC) is one possible market mechanism to deliver energy efficiency projects. Sustainable BEER under the EPC mechanism is a comprehensive system which involves the various demands of sustainable dimensions, performance criteria and groups of project success factors, making multi-criteria decisions become a challenging problem for decision makers. This paper aims to examine the interrelationships of sustainable BEER by focusing on an existing hotel building. EPC mechanism is applied in the case study and an effective Analytic Network Process (ANP) approach is also employed in the research. The result indicates that sustainable BEER in hotel buildings under the EPC mechanism is mainly determined by project control mechanism, available technology, organizing capacity of the team leader, trust, accurate Measurement and Verification (M&V), and team workers' technical skills. Decision makers should dedicate more attention to these aspects. From the research findings, several policy implications are proposed in this paper. (C) 2015 Elsevier Ltd. All rights reserved.

C1 [Xu, Pengpeng] Chongqing Univ, Sch Construct Management & Real Estate, Chongqing 400044, Peoples R China.

[Xu, Pengpeng] Chongqing Univ, Int Res Ctr Sustainable Built Environm, Chongqing 400044, Peoples R China.

[Chan, Edwin H. W.; Wu, Zezhou] Hong Kong Polytech Univ, Dept Bldg & Real Estate, Hong Kong, Hong Kong, Peoples R China.

[Visscher, Henk J.] Delft Univ Technol, OTB Res Inst Built Environm, NL-2628 BX Delft, Netherlands.

[Zhang, Xiaoling] City Univ Hong Kong, Dept Publ Policy, Hong Kong, Hong Kong, Peoples R China.

RP Xu, PP (reprint author), Chongqing Univ, Sch Construct Management & Real Estate, 174 Shazhengjie, Chongqing 400044, Peoples R China.

EM xuppcn@gmail.com

RI Chan, Edwin Hon Wan/D-9630-2012; Visscher, Henk/R-8509-2017

OI Chan, Edwin Hon Wan/0000-0003-4841-6956; Visscher,  
Henk/0000-0003-0929-1812; Wu, Zezhou/0000-0002-8687-0466; Zhang,  
Xiaoling/0000-0002-6369-9424

FU NSFC [71403033]; Fundamental Research Funds for the Central Universities  
[106112012CDJJK0008, 106112013CDJJK0300005]; Hong Kong Polytechnic  
University

FX This research is supported by the NSFC (Project No. 71403033), the  
Fundamental Research Funds for the Central Universities (Project Nos.  
106112012CDJJK0008; 106112013CDJJK0300005) and a research grant from the  
Hong Kong Polytechnic University.

CR AACPS Development Office, 2005, INTR PROJ SUST

Bassioni HA, 2005, CONSTR MANAG ECON, V23, P495, DOI 10.1080/0144619042000301401

Chan APC, 2004, J CONSTR ENG M ASCE, V130, P153, DOI 10.1061/(ASCE)0733-9364(2004)130:1(153)

Chan A.P.L., 2004, THESIS HONG KONG POL

Chua DKH, 1999, J CONSTR ENG M ASCE, V125, P142, DOI 10.1061/(ASCE)0733-9364(1999)125:3(142)

Han Q., 2006, P INT C ENH BUILD OP

Jharkharia S, 2007, OMEGA-INT J MANAGE S, V35, P274, DOI 10.1016/j.omega.2005.06.005

David S, 1996, FACILITIES, V14, P15

Meade LM, 1999, INT J PROD RES, V37, P241, DOI 10.1080/002075499191751

Mickaityte A, 2008, INT J STRATEG PROP M, V12, P53, DOI 10.3846/1648-715X.2008.12.53-68

NAESCO, 2007, EPA INTR EN PERF CON

OECD, 2008, OECD INS SUST DEV LI

Saaty T. L., 1996, ANAL NETWORK PROCESS

Saaty T. L., 2005, THEORY APPL ANAL NET



SAATY T L, 1980, ANAL HIERARCHY PROCE  
 Saaty T.L., 2001, DEC MAK IND FEEDB AN  
 Seefeldt R, 2003, ECEEE 2003 SUMMER ST, P1013  
 Shen L.H., 2007, PROMOTING EPC MECHAN  
 Sitar M, 2006, C HOUS EXP EUR THEOR  
 Sobotka A, 1998, FACILITIES, V16, P319  
 Sun J.Y., 2007, LOW TEMP ARCHIT TECH, V5, P130  
 Xu PP, 2012, FACILITIES, V30, P432, DOI 10.1108/02632771211235242  
 Xu PP, 2013, J GREEN BUILD, V8, P177, DOI 10.3992/jgb.8.1.177  
 Xu PP, 2013, HABITAT INT, V37, P104, DOI 10.1016/j.habitatint.2011.12.004  
 Xu PP, 2011, ENERG POLICY, V39, P7389, DOI 10.1016/j.enpol.2011.09.001  
 Xu P.P., 2009, P CRIOCM 2009 INT RE  
 Xue Z.F., 2007, ENERGY SAVINGS PUBLI  
 Zhou Y. C., 2008, P 16 NAT HVAC F C NO

NR 28

TC 18

Z9 18

U1 11

U2 70

PU ELSEVIER SCI LTD

PI OXFORD

PA THE BOULEVARD, LANGFORD LANE, KIDLINGTON, OXFORD OX5 1GB, OXON, ENGLAND

SN 0959-6526

EI 1879-1786

J9 J CLEAN PROD

JI J. Clean Prod.

PD NOV 16

PY 2015

VL 107

BP 378

EP 388

DI 10.1016/j.jclepro.2014.12.101

PG 11

WC GREEN & SUSTAINABLE SCIENCE & TECHNOLOGY; Engineering, Environmental;  
 Environmental SciencesSC Science & Technology - Other Topics; Engineering; Environmental Sciences  
 & Ecology

GA CT8MP

UT WOS:000363071000037

DA 2018-05-03

ER

PT J

AU Farzan, F

Jafari, MA

Gong, J

Farzan, F

Stryker, A

AF Farzan, Farbod

Jafari, Mohsen A.

Gong, Jie

Farzan, Famaz

Stryker, Andrew

TI A multi-scale adaptive model of residential energy demand

SO APPLIED ENERGY

LA English

DT Article

DE Bottom-up demand modeling; Technology adoption; Demand side management;

Electric vehicles; Price responsive demand  
ID ENGINEERING MODELS; SECTOR; CONSUMPTION

AB In this paper, we extend a previously developed bottom-up energy demand model such that the model can be used to determine changes in behavioral and energy usage patterns of a community when: (i) new load patterns from Plug-in Electrical Vehicles (PEV) or other devices are introduced; (ii) new technologies and smart devices are used within premises; and (iii) new Demand Side Management (DSM) strategies, such as price responsive demand are implemented. Unlike time series forecasting methods that solely rely on historical data, the model only uses a minimal amount of data at the atomic level for its basic constructs. These basic constructs can be integrated into a household unit or a community model using rules and connectors that are, in principle, flexible and can be altered according to the type of questions that need to be answered. Furthermore, the embedded dynamics of the model works on the basis of: (i) Markovian stochastic model for simulating human activities, (ii) Bayesian and logistic technology adoption models, and (iii) optimization, and rule-based models to respond to price signals without compromising users' comfort. The proposed model is not intended to replace traditional forecasting models. Instead it provides an analytical framework that can be used at the design stage of new products and communities to evaluate design alternatives. The framework can also be used to answer questions such as why demand behaves the way it does by examining demands at different scales and by playing What-If games. These analyses are not possible with demand forecast models built on historical samples, simply because, these forecast models and their level of accuracy are limited by their training data sets and can hardly demonstrate variations that are not present in the historical data sets. (C) 2015 Elsevier Ltd. All rights reserved.

C1 [Farzan, Farbod; Jafari, Mohsen A.; Gong, Jie] Rutgers State Univ, Piscataway, NJ 08855 USA.

RP Gong, J (reprint author), Rutgers State Univ, Piscataway, NJ 08855 USA.

EM jafari@rci.rutgers.edu; jg931@rcrutgers.edu

CR Aghaei J, 2013, RENEW SUST ENERG REV, V18, P64, DOI 10.1016/j.rser.2012.09.019

Aigner DJ, 1984, ENERGY J, V5, P81, DOI DOI 10.5547/ISSN0195-6574-EJ-V015-N03-6

Attari S, 2010, P NATL ACAD SCI

Aydinalp M, 2002, APPL ENERG, V71, P87, DOI 10.1016/S0306-2619(01)00049-6

Brodick JR, 2002, US LIGHTING MARKET

Campillo J, 2012, INT C APPL EN ICAE S

CAPASSO A, 1994, IEEE T POWER SYST, V9, P957, DOI 10.1109/59.317650

Cappers P, 2010, ENERGY, V35, P1526, DOI 10.1016/j.energy.2009.06.029

CAVES DW, 1987, REV ECON STAT, V69, P438, DOI 10.2307/1925531

Chiou YS, 2009, 11 INT IBPSA C GLASG

Coe DL, 2002, 11 ANN EM INV C APR

Conejo AJ, 2010, IEEE T SMART GRID, V1, P236, DOI 10.1109/TSG.2010.2078843

Curtin R., 2009, PLUG IN HYBRID ELECT

Electric Drive Transportation Association, 2014, EL DRIV SAL DASH

EnergyPlus Energy Simulation Software, WEATH DAT

Gail S, 2001, 55 ASHRAE

Grahn P, 2013, IEEE T POWER SYST, V28, P2507, DOI 10.1109/TPWRS.2012.2230193

[Anonymous], GREEN BUILD OPE MAIN

Hamermesh DS, 2005, J ECON PERSPECT, V19, P221, DOI 10.1257/0895330053148029

Huang Y. J., 2000, LBNL46303

Kadian R, 2007, ENERG POLICY, V35, P6195, DOI 10.1016/j.enpol.2007.07.014

Kassakian G., 2011, FUTURE ELECT GRID

Kohler N, 1997, 2 INT C BUILD ENV PA

Larsen BM, 2004, ENERG ECON, V26, P179, DOI 10.1016/j.eneco.2004.02.001

Mihalakakou G, 2002, ENERG BUILDINGS, V34, P727, DOI 10.1016/S0378-7788(01)00137-2

Min J, 2014, ECOL ECON, V97, P42, DOI 10.1016/j.ecolecon.2013.10.015

Muratori M, 2013, P ASME2013 DYN SYST

Muratori M, 2013, P 26 INT C ECOS JUL

Muratori M, 2014, RENEW SUST ENERG REV, V33, P546, DOI 10.1016/j.rser.2014.02.027

Muratori M, 2013, APPL ENERG, V107, P465, DOI 10.1016/j.apenergy.2013.02.057

ONEAL DL, 1980, IEEE T SYST MAN CYB, V10, P749

Pandit S. M., 1983, TIME SERIES SYSTEM A

Pesaran A., 2007, 23 INT EL VEH S EXP

Raffio G, 2007, PROCEEDINGS OF THE ENERGY SUSTAINABILITY CONFERENCE 2007, P489

Ramirez R, 2005, IBPSA 9 INT C MONTR, P1003

Reinhart CF, 2004, SOL ENERGY, V77, P15, DOI 10.1016/j.solener.2004.04.003  
 Richard V, 2010, PRACTICE  
 Richardson I, 2008, ENERGBUILDINGS, V40, P1560, DOI 10.1016/j.enbuild.2008.02.006  
 Schey S, 2012, 26 EL VEH S EVS 26 L  
 Swan LG, 2009, RENEW SUST ENER REV, V13, P1819, DOI 10.1016/j.rser.2008.09.033  
 U.S Department of Energy, RED HOT WAT EN SAV  
 U.S. Department of Transportation; Federal Highway Administration, LIC DRIV AG SEX  
 U. S. Department of Transportation; Federal Highway Administration, DRIV  
 U. S. Energy Information Administration, TOD IN EN  
 U.S. Energy Information Administration, 2012, EL DET STAT DAT  
 Vaghefi, 2014, APPL ENER, V136, P186  
 Widen J, 2010, APPL ENER, V87, P1880, DOI 10.1016/j.apenergy.2009.11.006

NR 47

TC 18

Z9 18

U1 0

U2 24

PU ELSEVIER SCI LTD

PI OXFORD

PA THE BOULEVARD, LANGFORD LANE, KIDLINGTON, OXFORD OX5 1GB, OXON, ENGLAND

SN 0306-2619

EI 1872-9118

J9 APPL ENER

JI Appl. Energy

PD JUL 15

PY 2015

VL 150

BP 258

EP 273

DI 10.1016/j.apenergy.2015.04.008

PG 16

WC Energy &amp; Fuels; Engineering, Chemical

SC Energy &amp; Fuels; Engineering

GA CK3NJ

UT WOS:000356122500024

DA 2018-05-03

ER

PT J

AU Lin, BQ

Liu, HX

AF Lin, Boqiang

Liu, Hongxun

TI A study on the energy rebound effect of China's residential building energy efficiency

SO ENERGY AND BUILDINGS

LA English

DT Article

DE Building energy efficiency; Energy rebound effect; LA-AIDS model

ID DEMAND; CONSUMPTION; PRICES; KOREA

AB China's building energy efficiency design standards have been always treated as the base of national energy conservation planning and industrial investment. However, they cannot fully achieve the expected benefits due to the energy rebound effect. This paper verifies the energy rebound effect in China's urban and rural residential buildings based on the LA-AIDS theory, and further estimates the building energy conservation by counterfactual analysis, catching the specific influences of rebound effect on building energy conservation and the corresponding residential building energy conservation potentials of China. The empirical results reveal that: (i) The rebound effect in the rural residential buildings is much larger than that in the urban residential buildings, where presenting the "back-fire" effect. (ii) The rebound effect

in the rural residential buildings is weakening while it is enhancing in the urban residential buildings. (iii) Nationally, if energy policies including price policies, technological improvements as well as some other measures were implemented to avoid the rebound effect, we could have conserved about 20% electricity consumption in China's residential buildings each year. The magnitude increased by time to the highest level (107.66 GWh) in 2011, equivalent to the CO<sub>2</sub> emission reduction of 0.1 billion tons. (C) 2014 Elsevier B.V. All rights reserved.

C1 [Lin, Boqiang] Xiamen Univ, Collaborat Innovat Ctr Energy Econ & Energy Polic, Sch Econ, Xiamen 361005, Fujian, Peoples R China.

[Lin, Boqiang] Minjiang Univ, Newhuadu Business Sch, Fuzhou 350108, Fujian, Peoples R China.

[Liu, Hongxun] Xiamen Univ, China Ctr Energy Econ Res, Sch Econ, Xiamen 361005, Fujian, Peoples R China.

RP Lin, BQ (reprint author), Minjiang Univ, Newhuadu Business Sch, Fuzhou 350108, Fujian, Peoples R China.

EM bqlin@xmu.edu.cn

RI Lin, Boqiang/G-3960-2010

OI Lin, Boqiang/0000-0002-1308-400X

FU Newhuadu Business School Research Fund; China Sustainable Energy Program [G-1311-19436, G-1404-20905]; Ministry of Education [10JBG013]

FX This paper is supported by Newhuadu Business School Research Fund, the China Sustainable Energy Program (G-1311-19436, and G-1404-20905), and Ministry of Education (Grant No. 10JBG013).

CR Ban G.S., 2011, BUILDING HEATING AIR

Barker T, 2007, ENERG POLICY, V35, P4935, DOI 10.1016/j.enpol.2007.04.009

Bentzen J, 2004, ENERG ECON, V26, P123, DOI 10.1016/S0140-9883(03)00047-1

Berkhout PHG, 2000, ENERG POLICY, V28, P425, DOI 10.1016/S0301-4215(00)00022-7

Birol F, 2000, ENERG POLICY, V28, P457, DOI 10.1016/S0301-4215(00)00020-3

BROOKES L, 1990, ENERG POLICY, V18, P199, DOI 10.1016/0301-4215(90)90145-T

Chen K., 2011, J IND TECHNOLOGICAL, V4

Chen Y., 2011, EC PROBLEMS, V2, P126

Cho WG, 2004, ENERG ECON, V26, P31, DOI 10.1016/j.eneco.2003.04.001

CHRISTENSEN LR, 1975, AM ECON REV, V65, P367

DEATON A, 1980, AM ECON REV, V70, P312

Greene W. H., 2003, ECONOMETRIC ANAL

Greening LA, 2000, ENERG POLICY, V28, P389

[?? Guo Juan], 2010, [????, Resources Science], V32, P1839

Hang LM, 2007, ENERG POLICY, V35, P2978, DOI 10.1016/j.enpol.2006.10.022

Hens H, 2010, ENERG BUILDINGS, V42, P105, DOI 10.1016/j.enbuild.2009.07.017

Jevons W.S., 1865, J STAT SOC LONDON, P294

Jiang Y., 2011, CONSTRUCTION SCI TEC, V11, P15

Jin SH, 2007, ENERG POLICY, V35, P5622, DOI 10.1016/j.enpol.2007.05.028

Lin BQ, 2013, ENERGY, V59, P240, DOI 10.1016/j.energy.2013.07.021

Lin BQ, 2012, ENERGY, V45, P867, DOI 10.1016/j.energy.2012.06.077

Lin B.Q., 2009, J FINANC RES, V11, P1

Lin B.Q, 2014, ENERGY POLICY

[??? LIU Yuanyuan], 2008, [????, Resources Science], V30, P1300

Long W.D., 2005, ENERGY CHINA, V27, P23

Milne G, 2000, ENERG POLICY, V28, P411, DOI 10.1016/S0301-4215(00)00019-7

Mizobuchi K, 2008, ENERG ECON, V30, P2486, DOI 10.1016/j.eneco.2008.01.001

Orasch W, 1997, ENERG POLICY, V25, P1129, DOI 10.1016/S0301-4215(97)00105-5

Ouyang JL, 2010, ENERGY, V35, P5269, DOI 10.1016/j.energy.2010.07.038

Roy J, 2000, ENERG POLICY, V28, P433, DOI 10.1016/S0301-4215(00)00027-6

Saunders H. D., 1992, ENERGY J, V13

Shi J., 2011, SCIENCE

Sorrell S, 2007, 2 UK EN RES CTR

Sorrell S., 2007, REBOUND EFFECT ASSES

Sorrell S, 2009, ENERG POLICY, V37, P1356, DOI 10.1016/j.enpol.2008.11.026

Stone R, 1954, ECON J, V64, P511, DOI 10.2307/2227743

THEIL H, 1965, ECONOMETRICA, V33, P67, DOI 10.2307/1911889

Wang H., 2011, ENERGETICS, V34, P452  
 [??? WANG Qunwei], 2008, [????, Chinese Journal of Management], V5, P688  
 Wirf F., 1997, EC CONSERVATION PROG  
 ZELLNER A., 1962, J AM STAT ASSOC, V57, P348, DOI 10.2307/2281644  
 Zhao H.C., 2012, ENERGY TECHNOLOGY EC, V24, P39  
 Zhou Y., 2007, ECONOMIST, V2, P45  
 Zhu L., 2010, EMPIRICAL STUDY CHIN

NR 44

TC 18

Z9 20

U1 0

U2 35

PU ELSEVIER SCIENCE SA

PI LAUSANNE

PA PO BOX 564, 1001 LAUSANNE, SWITZERLAND

SN 0378-7788

EI 1872-6178

J9 ENERGETICS BUILDINGS

JI Energy Build.

PD JAN

PY 2015

VL 86

BP 608

EP 618

DI 10.1016/j.enbuild.2014.10.049

PG 11

WC Construction &amp; Building Technology; Energy &amp; Fuels; Engineering, Civil

SC Construction &amp; Building Technology; Energy &amp; Fuels; Engineering

GA AY3PI

UT WOS:000347494900057

DA 2018-05-03

ER

PT J

AU Du, P

Zheng, LQ

Xie, BC

Mahalingam, A

AF Du, Ping

Zheng, Li-Qun

Xie, Bai-Chen

Mahalingam, Arjun

TI Barriers to the adoption of energy-saving technologies in the building

sector: A survey study of Jing-jin-tang, China

SO ENERGY POLICY

LA English

DT Article

DE Barrier; Building sector; Energy-saving technology; Factor analysis;

Survey study

ID MEDIUM-SIZED ENTERPRISES; EFFICIENT USE; LONG-TERM; CONSERVATION;

EVIDENCES; BENEFITS; DRIVERS; COSTS

AB The building sector of China currently consumes 20% of the total energy consumption. Studies on barriers to the adoption of building energy-saving technologies are of great significance on implementing policies related to achieving energy-saving goals. This paper studied 15 barriers with the aid of information collected through questionnaires and semi-structured interviews. The respondents were 135 employees working in the Jing-jin-tang area. Based on the results of the factor analysis, the barriers were categorized into five groups: attitudes of stakeholders, policies and regulations, auxiliary resources, profitability, and adaptability of the technologies. Analysis of the entire sample showed that the stakeholders' reluctance to

use was the largest barrier, followed by high initial investment and low profitability. Further analysis showed that the occupation and designation of the respondents and the size of the enterprises that they served influenced their perspectives on the barriers. It was found that architects attributed more importance to the adoption of energy-saving technologies than contractors; barriers confronted by employees of large enterprises and small enterprises were different; managers perceived weaker barriers than frontline employees and were more optimistic about the prospect of building energy-saving technologies. Finally, policy recommendations were proposed based on these in-depth and targeted analyses. (C) 2014 Elsevier Ltd. All rights reserved.

C1 [Du, Ping; Zheng, Li-Qun; Xie, Bai-Chen] Tianjin Univ, Coll Management & Econ, Tianjin 300072, Peoples R China.

[Xie, Bai-Chen] Chinese Acad Sci, Inst Policy & Management, Ctr Energy & Environm Policy, Beijing 100190, Peoples R China.

[Mahalingam, Arjun] Univ Cambridge, Judge Business Sch, Energy Policy Res Grp, Cambridge CB2 1TN, England.

RP Xie, BC (reprint author), Tianjin Univ, Coll Management & Econ, Tianjin 300072, Peoples R China.

EM xiebaichen@tju.edu.cn

OI Xie, Bai-Chen/0000-0002-9588-830X

FU National Natural Science Foundation of China [71003072, 71373172]; National Development and Reform Commission [2012023]; Ministry of Housing and Urban-rural Development of China [11-R1-338]; Tianjin Urban-Rural Construction and Transport Commission; China State Construction Engineering Corporation

FX We would like to express our gratitude to the reviewers and Dr. David Reiner of University of Cambridge. Their constructive comments played an important role in improving the quality of our manuscript. We also sincerely acknowledge the financial support from the National Natural Science Foundation of China under Grant nos. 71003072 and 71373172, the support from National Development and Reform Commission under Grant no. 2012023 and the support from Ministry of Housing and Urban-rural Development of China under Grant no. 11-R1-338. Moreover, the authors are also grateful to the Tianjin Urban-Rural Construction and Transport Commission, China State Construction Engineering Corporation and Dr. Peng-Cheng Sun of China State Construction Technical Center for their support in this survey study.

CR Akadiri P. O., 2013, CONSTR INNOV INF PRO, V13, P352, DOI DOI 10.1108/CI-05-2012-0025

Arvanitis S., 2012, ENVIRON RESOUR ECON, V54, P389

BLUMSTEIN C, 1980, ENERGY, V5, P355, DOI 10.1016/0360-5442(80)90036-5

Cagno E, 2013, RENEW SUST ENERG REV, V19, P290, DOI 10.1016/j.rser.2012.11.007

Cagno E, 2013, APPL ENERG, V104, P276, DOI 10.1016/j.apenergy.2012.10.053

Cal W. G., 2009, ENERG POLICY, V37, P2054

Chinese construction enterprises management association (CCEMA), 2013, TOP 500 CHIN CONSTR

Chan EHW, 2009, ENERG POLICY, V37, P3061, DOI 10.1016/j.enpol.2009.03.057

Chen J, 2013, ENERG BUILDINGS, V66, P193, DOI 10.1016/j.enbuild.2013.07.045

Chiogioji M. H., 1979, J ENERGY DEV, V5, P353

Davies P, 2011, BUILD ENVIRON, V46, P1691, DOI 10.1016/j.buildenv.2011.02.011

Groot H. L. F. d., 2001, ENERG ECON, V23, P717

He XS, 2013, BUILD ENVIRON, V64, P130, DOI 10.1016/j.buildenv.2013.03.013

Hebei Government, 2013, HEB EC YB 2013

HIRST E, 1990, RESOUR CONSERV RECY, V3, P267, DOI 10.1016/0921-3449(90)90023-W

IEA, 2008, PROM EN EFF INV CAS

International Energy Agency (IEA), 2012, WORD EN OUTL 2011

Intrachooto S, 2007, BUILD ENVIRON, V42, P599, DOI 10.1016/j.buildenv.2005.10.002

Issa MH, 2010, BUILD ENVIRON, V45, P1698, DOI 10.1016/j.buildenv.2010.01.020

Kong XF, 2012, ENERG POLICY, V41, P624, DOI 10.1016/j.enpol.2011.11.024

Kostka G, 2013, J CLEAN PROD, V57, P59, DOI 10.1016/j.jclepro.2013.06.025

Masselink D. J., 2008, BARRIERS INVESTMENTS

Montalvo C, 2008, J CLEAN PROD, V16, pS7, DOI 10.1016/j.jclepro.2007.10.002

Morrissey J, 2011, ENERG BUILDINGS, V43, P915, DOI 10.1016/j.enbuild.2010.12.013

NBSC National Bureau of Statistics of China, 2013, CHIN STAT YB 2013  
Oppenheim A. N., 2001, QUESTIONNAIRE DESIGN  
Osmani M, 2008, WASTE MANAGE, V28, P1147, DOI 10.1016/j.wasman.2007.05.01  
Osmani M., 2006, P INST CIVIL ENG WAS, V159, P665  
Osmani M, 2009, BUILD ENVIRON, V44, P1917, DOI 10.1016/j.buildenv.2009.01.005  
Rohdin P, 2007, ENERG POLICY, V35, P672, DOI 10.1016/j.enpol.2006.01.010  
SCHIPPER L, 1978, FORENSIC QUART, V52, P138  
Shui Y. K., 2010, SOCIAL SURVEY TUTORI  
Sorrell Steve, 2004, EC ENERGY EFFICIENCY  
Sorrell S., 2000, REDUCING BARRIERS EN  
Tan YT, 2011, HABITAT INT, V35, P225, DOI 10.1016/j.habitatint.2010.09.008  
Thollander R, 2007, ENERG POLICY, V35, P5774  
Tsinghua University Building Energy Research Center (THUBERC), 2013, 2013 ANN REP CHIN BU  
Trianni A, 2012, ENERGY, V37, P494, DOI 10.1016/j.energy.2011.11.005  
Wagner A, 2014, ENERG BUILDINGS, V68, P634, DOI 10.1016/j.enbuild.2013.09.047  
Wang JY, 2014, RESOUR CONSERV RECY, V82, P1, DOI 10.1016/j.resconrec.2013.11.003  
Weber L, 1997, ENERG POLICY, V25, P833, DOI 10.1016/S0301-4215(97)00084-0  
Wong PSP, 2013, INT J PROJ MANAG, V31, P1042, DOI 10.1016/j.ijproman.2012.11.004  
Yik F. W. H, 2002, HKIE T, V9, P32  
Yu S, 2014, ENERG POLICY, V67, P626, DOI 10.1016/j.enpol.2013.11.009  
Zhang XL, 2011, BUILD ENVIRON, V46, P2153, DOI 10.1016/j.buildenv.2011.04.031  
Zhang YR, 2013, ENERG POLICY, V62, P768, DOI 10.1016/j.enpol.2013.06.128  
Zhu QH, 2013, J CLEAN PROD, V40, P6, DOI 10.1016/j.jclepro.2010.09.017

NR 47  
TC 18  
Z9 18  
U1 2  
U2 24  
PU ELSEVIER SCI LTD  
PI OXFORD  
PA THE BOULEVARD, LANGFORD LANE, KIDLINGTON, OXFORD OX5 1GB, OXON, ENGLAND  
SN 0301-4215  
EI 1873-6777  
J9 ENERG POLICY  
JI Energy Policy  
PD DEC  
PY 2014  
VL 75  
BP 206  
EP 216  
DI 10.1016/j.enpol.2014.09.025  
PG 11  
WC Economics; Energy & Fuels; Environmental Sciences; Environmental Studies  
SC Business & Economics; Energy & Fuels; Environmental Sciences & Ecology  
GA AY5HY  
UT WOS:000347604500024  
DA 2018-05-03  
ER

PT J  
AU Azar, E  
    Menassa, CC  
AF Azar, Elie  
    Menassa, Carol C.  
TI Framework to Evaluate Energy-Saving Potential from Occupancy  
    Interventions in Typical Commercial Buildings in the United States  
SO JOURNAL OF COMPUTING IN CIVIL ENGINEERING  
LA English

DT Article

DE Commercial buildings; Energy efficiency; United States; Commercial buildings; Energy conservation; Energy efficiency; Agent-based modeling; Social subnetworks

ID NORMATIVE SOCIAL-INFLUENCE; ELECTRICITY CONSUMPTION; ENVIRONMENTAL BEHAVIOR; EXTREMISM PROPAGATION; BOUNDED CONFIDENCE; DECISION-MAKING; NETWORKS; DYNAMICS; CONSERVATION; DIFFUSION

AB Occupancy-focused interventions to reduce building energy use have been shown to be effective but often result in unsustainable energy reductions. In addition, these interventions have rarely been applied to commercial buildings. Research on residential buildings has linked the success of these interventions to the buildings' social structures. However, the results cannot be directly applied to commercial buildings given their complex social structures formed by independent entities (i.e., companies) with different organizational structures and cultures within a building. In this paper, an agent-based modeling framework is developed to (1) provide a more realistic representation of social subnetworks in commercial buildings, (2) model interactions between occupants and the resulting peer pressure to change their energy-use characteristics based on the relative agreement interaction model, and (3) evaluate the efficiency of occupancy interventions for different subnetwork characteristics on a typical medium-sized office building in the United States. Statistical analyses are performed and recommendations made on how to improve energy conservation from occupancy interventions by as much as 24.7%. The contributions of this research to the fields of computing and energy conservation are significant and can be used to shape future occupancy interventions for more effective and sustained energy reductions in commercial buildings.

C1 [Azar, Elie] Univ Wisconsin, Dept Civil & Environm Engr, Madison, WI 53706 USA.

[Menassa, Carol C.] Univ Michigan, Dept Civil & Environm Engr, Ann Arbor, MI 48109 USA.

RP Menassa, CC (reprint author), Univ Michigan, Dept Civil & Environm Engr, 2322 GG Brown, 2315 Hayward St, Ann Arbor, MI 48109 USA.

EM eazar@wisc.edu; menassa@umich.edu

FU U.S. National Science Foundation (NSF) [CBET 1132734]; Wisconsin Alumni Research Foundation (WARF)

FX The authors would like to acknowledge the financial support for this research received from the U.S. National Science Foundation (NSF) Award CBET 1132734 and the Wisconsin Alumni Research Foundation (WARF). Any opinions and findings in this paper are those of the authors and do not necessarily represent those of NSF or WARF.

CR Abrahamse W, 2005, J ENVIRON PSYCHOL, V25, P273, DOI 10.1016/j.jenvp.2005.08.002

Agliari E, 2006, PHYS REV E, V73, DOI 10.1103/PhysRevE.73.046138

Allcott H, 2010, SCIENCE, V327, P1204, DOI 10.1126/science.1180775

Amblard F, 2004, PHYSICA A, V343, P725, DOI 10.1016/j.physa.2004.06.102

Anderson K, 2014, J COMPUT CIVIL ENG, V28, P30, DOI 10.1061/(ASCE)CP.1943-5487.0000314

Apolloni A, 2011, ADV COMPLEX SYST, V14, P151, DOI 10.1142/S0219525911003037

Azar E, 2012, ENERG BUILDINGS, V55, P841, DOI 10.1016/j.enbuild.2012.10.002

Azar E, 2012, J COMPUT CIVIL ENG, V26, P506, DOI 10.1061/(ASCE)CP.1943-5487.0000158

Barabasi AL, 1999, SCIENCE, V286, P509, DOI 10.1126/science.286.5439.509

Bartels G., 2002, MARKETING SUSTAINABI

Borshchev A., 2004, P 22 INT C SYST DYN

Bosch SJ, 2003, J PERFORM CONSTR FAC, V17, P9, DOI 10.1061/(ASCE)0887-3828(2003)17:1(9)

Capehart BL, 2003, GUIDE ENERGY MANAGEM

Carrico AR, 2011, J ENVIRON PSYCHOL, V31, P1, DOI 10.1016/j.jenvp.2010.11.004

Chen JY, 2012, ENERG BUILDINGS, V47, P515, DOI 10.1016/j.enbuild.2011.12.026

Cho Y, 2012, TECHNOL FORECAST SOC, V79, P97, DOI 10.1016/j.techfore.2011.06.003

Deffuant G, 2000, APPLICATIONS OF SIMULATION TO SOCIAL SCIENCES, P87, DOI 10.1142/S0219525900000078

Deffuant G, 2002, JASSS-J ARTIF SOC S, V5, P1

Dittmer JC, 2001, NONLINEAR ANAL-THEOR, V47, P4615, DOI 10.1016/S0362-546X(01)00574-0

Edmonds B., 2007, SOCIAL SIMULATION TE

Emery AF, 2006, ENERGY, V31, P677, DOI 10.1016/j.energy.2005.04.006

EPA, 2010, EPA 2010 ANN REP

Faruqui A, 2010, ENERGY, V35, P1598, DOI 10.1016/j.energy.2009.07.042

Franks DW, 2008, ADAPT BEHAV, V16, P264, DOI 10.1177/1059712308090536



- Frenken K, 2007, J ECON GEOGR, V7, P635, DOI 10.1093/jeg/lbm018  
 Gilbert GN., 2008, AGENT BASED MODELS  
 Gockeritz S, 2010, EUR J SOC PSYCHOL, V40, P514, DOI 10.1002/ejsp.643  
 Groeber P., 2009, ARTIF SOC SOC SIMUL, V12, P1  
 Gumm KE, 2012, INF SECUR J, V21, P115, DOI 10.1080/19393555.2011.647251  
 Hegselmann R., 2002, JASSS-J ARTIF SOC S, V5, P1  
 Jackson T., 2005, MOTIVATING SUSTAINAB  
 Krause U., 2000, COMMUN DIFFERENCE EQ, V25, P227  
 Kurant M., 2006, PHYS REV LETT, V96, P1  
 Kurmyshev E, 2011, PHYSICA A, V390, P2945, DOI 10.1016/j.physa.2011.03.037  
 Lutzenhiser L, 2002, UNDERSTANDING RESPON  
 Mason WA, 2007, PERS SOC PSYCHOL REV, V11, P279, DOI 10.1177/1088868307301032  
 Masoso OT, 2010, ENERG BUILDINGS, V42, P173, DOI 10.1016/j.enbuild.2009.08.009  
 McKenzie-Mohr D, 2000, J SOC ISSUES, V56, P543, DOI 10.1111/0022-4537.00183  
 Meier A, 2006, ENERG BUILDINGS, V38, P1296, DOI 10.1016/j.enbuild.2006.04.008  
 Nekovee M, 2007, PHYSICA A, V374, P457, DOI 10.1016/j.physa.2006.07.017  
 Nolan JM, 2008, PERS SOC PSYCHOL B, V34, P913, DOI 10.1177/0146167208316691  
 Oreszczyn T, 2010, BUILD RES INF, V38, P107, DOI 10.1080/09613210903265432  
 Payne C., 2006, COMMERCIAL ENERGY CO  
 Peschiera G, 2012, ENERG BUILDINGS, V49, P584, DOI 10.1016/j.enbuild.2012.03.011  
 Peschiera G, 2010, ENERG BUILDINGS, V42, P1329, DOI 10.1016/j.enbuild.2010.03.001  
 Pickens P. M., 2002, COMMUNITY BASED SOCI  
 Sailer K, 2012, SOC NETWORKS, V34, P47, DOI 10.1016/j.socnet.2011.05.005  
 Salzarulo L., 2006, ARTIF SOC SOC SIMUL, V9, P13  
 Sanchez M., 2007, 2006 ACEEE SUMM STUD  
 Schein J, 2006, ENERG BUILDINGS, V38, P1485, DOI 10.1016/j.enbuild.2006.04.014  
 Schultz PW, 2008, SOC INFLUENCE, V3, P4, DOI 10.1080/15534510701755614  
 Squillante M, 2010, INT J INTELL SYST, V25, P225, DOI 10.1002/int.20397  
 Staats H, 2000, J APPL BEHAV ANAL, V33, P101, DOI 10.1901/jaba.2000.33-101  
 Staats H, 2004, ENVIRON BEHAV, V36, P341, DOI 10.1177/0013916503260163  
 Steg L, 2009, J ENVIRON PSYCHOL, V29, P309, DOI 10.1016/j.jenvp.2008.10.004  
 Technologies XJ, 2009, AN OV  
 United Nations Environment Programme (UNEP), 2007, BUILD CAN PLAY KEY R  
 U.S. Energy Information Agency (EIA), 2011, 2011 ANN EN OUTL  
 U. S. Energy Information Administration, 2003, COMM BUILD EN CONS S  
 Verplanken B, 2006, J PUBLIC POLICY MARK, V25, P90, DOI 10.1509/jppm.25.1.90  
 Wasserman S, 1994, SOCIAL NETWORK ANAL  
 Watts DJ, 1998, NATURE, V393, P440, DOI 10.1038/30918  
 WEENIG MWH, 1991, J PERS SOC PSYCHOL, V61, P734, DOI 10.1037//0022-3514.61.5.734  
 SCHLUTER D., 2009, ANAL BIOL DATA  
 Yeung YY, 2005, AM J PHYS, V73, P145, DOI 10.1119/1.1775799  
 Yudelson J., 2010, GREENING EXISTING BU

NR 66

TC 18

Z9 18

U1 1

U2 11

PU ASCE-AMER SOC CIVIL ENGINEERS

PI RESTON

PA 1801 ALEXANDER BELL DR, RESTON, VA 20191-4400 USA

SN 0887-3801

EI 1943-5487

J9 J COMPUT CIVIL ENG

JI J. Comput. Civil. Eng.

PD JAN 1

PY 2014

VL 28

IS 1

BP 63

EP 78

DI 10.1061/(ASCE)CP.1943-5487.0000318

PG 16

WC Computer Science, Interdisciplinary Applications; Engineering, Civil

SC Computer Science; Engineering

GA AD7LT

UT WOS:000333446100007

DA 2018-05-03

ER

PT J

AU Chen, C

Cook, DJ

Crandall, AS

AF Chen, Chao

Cook, Diane J.

Crandall, Aaron S.

TI The user side of sustainability: Modeling behavior and energy usage in the home

SO PERVASIVE AND MOBILE COMPUTING

LA English

DT Article

DE Smart environments; Machine learning; Energy; Anomaly detection

ID CONSUMPTION; BUILDINGS

AB Society is becoming increasingly aware of the impact that our lifestyle choices make on energy usage and the environment. As a result, research attention is being directed toward green technology, environmentally-friendly building designs, and smart grids. This paper looks at the user side of sustainability. In particular, it looks at energy consumption in everyday home environments to examine the relationship between behavioral patterns and energy consumption. It first demonstrates how data mining techniques may be used to find patterns and anomalies in smart home-based energy data. Next, it describes a method to correlate home-based activities with electricity usage. Finally, it describes how this information could inform users about their personal energy consumption and to support activities in a more energy-efficient manner. These approaches are validated by using real energy data collected in a set of smart home testbeds. (C) 2012 Elsevier B.V. All rights reserved.

C1 [Chen, Chao; Cook, Diane J.; Crandall, Aaron S.] Washington State Univ, Sch Elect Engn & Comp Sci, Pullman, WA 99164 USA.

RP Chen, C (reprint author), Washington State Univ, Sch Elect Engn & Comp Sci, Pullman, WA 99164 USA.

EM cchen@eecs.wsu.edu; cook@eecs.wsu.edu; acrandal@wsu.edu

CR Bellala G., 2011, P 3 ACM WORKSH EMB S, P6

BERGES M, 2009, ASCE INT WORKSH COMP

Boser B, 1992, P 5 ANN WORKSH COMP, V5, P144, DOI DOI 10.1145/130385.130401

Chawla NV, 2002, J ARTIF INTELL RES, V16, P321

Chawla N. V., 2004, ACM SIGKDD EXPLORATI, V6, P1, DOI DOI 10.1145/1007730.1007733

Chen C., 2011, IEEE INT C PERV COMP, P650

Cook D., 2004, WILEY SERIES PARALLE

Cook D. J., 2009, P CHI WORKSH DEV SHA

COOPE ID, 1993, J OPTIMIZ THEORY APP, V76, P381, DOI 10.1007/BF00939613

Darby S., 2006, REV DEFRA LIT METERI

Darby S, 2010, BUILD RES INF, V38, P442, DOI 10.1080/09613218.2010.492660

Google, 2012, GOOGL POW MET

Gupta S, 2010, UBIComp 2010: PROCEEDINGS OF THE 2010 ACM CONFERENCE ON UBIQUITOUS COMPUTING, P139

Gusfield D., 1997, ALGORITHMS STRINGS T

HART GW, 1992, P IEEE, V80, P1870, DOI 10.1109/5.192069

Ichinose T, 1999, ATMOS ENVIRON, V33, P3897, DOI 10.1016/S1352-2310(99)00132-6

Kim E, 2010, IEEE PERVAS COMPUT, V9, P48, DOI 10.1109/MPRV.2010.7

Kolter J. Z., 2011, C ART INT AAAI SPEC

Li XL, 2010, IEEE T IND ELECTRON, V57, P3639, DOI 10.1109/TIE.2009.2027926  
 Liu H, 2002, DATA MIN KNOWL DISC, V6, P393, DOI 10.1023/A:1016304305535  
 MCCREIGHT EM, 1976, J ACM, V23, P262, DOI 10.1145/321941.321946  
 Pearl J., 1988, PROBABILISTIC REASON  
 Riche Y, 2010, CHI2010: PROCEEDINGS OF THE 28TH ANNUAL CHI CONFERENCE ON HUMAN  
 FACTORS IN COMPUTING SYSTEMS, VOLS 1-4, P1995  
 Seem JE, 2007, ENERG BUILDINGS, V39, P52, DOI 10.1016/j.enbuild.2006.03.033  
 Seryak J., 2003, P SOL C, P717  
 Szewczyk S, 2009, Technol Health Care, V17, P161, DOI 10.3233/THC-2009-0546  
 Tukey JW, 1977, EXPLORATORY DATA ANA  
 U.S. Energy Information Administration, 2011, TECHNICAL REPORT  
 Witten I. H., 2005, DATA MINING PRACTICA  
 ZORNETZER SF, 1995, INTRO NEURAL ELECT N

NR 30

TC 18

Z9 18

U1 4

U2 39

PU ELSEVIER SCIENCE BV

PI AMSTERDAM

PA PO BOX 211, 1000 AE AMSTERDAM, NETHERLANDS

SN 1574-1192

J9 PERVASIVE MOB COMPUT

J1 Pervasive Mob. Comput.

PD FEB

PY 2013

VL 9

IS 1

BP 161

EP 175

DI 10.1016/j.pmcj.2012.10.004

PG 15

WC Computer Science, Information Systems; Telecommunications

SC Computer Science; Telecommunications

GA 088AG

UT WOS:000314805600012

DA 2018-05-03

ER

PT J

AU Kalz, DE

Herkel, S

Wagner, A

AF Kalz, Doreen E.

Herkel, Sebastian

Wagner, Andreas

TI The impact of auxiliary energy on the efficiency of the heating and  
 cooling system: Monitoring of low-energy buildings

SO ENERGY AND BUILDINGS

LA English

DT Article

DE End and primary energy use; Auxiliary energy use; Energy efficiency;  
 Energy long-term monitoring; Thermo-active building systems; Low-energy  
 building; Environmental heat source and sink

AB This paper presents a detailed meta-analysis of end and primary energy use for heating, cooling and  
 ventilation of I I low-energy non-residential buildings and one residential building in Germany that belong  
 to the EnOB research program launched by the German Federal Ministry for Economy. In particular, the  
 analysis emphasizes the substantial impact of auxiliary energy use on the efficiency of heating and cooling

performance. The investigated buildings employ environmental energy sources and sinks - such as the ground, ground water, rainwater and the ambient air - in combination with thermo-active building systems. These concepts are promising approaches for slashing the primary energy use of buildings without violating occupant thermal comfort. A limited primary energy use of about 100 kWh(prim)/m(ner)(2)a as a target for the complete building service technology (HVAC and lighting) was postulated for all buildings presented. With respect to this premise, a comprehensive long-term monitoring in high time resolution was carried out over the course of two to five years, with an accompanying commissioning of the building performance. Measurements include the energy use for heating, cooling, and ventilation, as well as the auxiliary equipment, the performance of the environmental heat source and sink, and local climatic site conditions. (C) 2009 Elsevier B.V. All rights reserved.

C1 [Kalz, Doreen E.; Herkel, Sebastian] ISE, Fraunhofer Inst Solar Energy Syst, D-79110 Freiburg, Germany.

[Wagner, Andreas] Univ Karlsruhe, Bldg Sci Group, D-76131 Karlsruhe, Germany.

RP Kalz, DE (reprint author), ISE, Fraunhofer Inst Solar Energy Syst, Heidenhofstr 2, D-79110 Freiburg, Germany.

EM doreen.kalz@ise.fraunhofer.de

FU German Ministry of Economics and Labour BMWi [BMWi 0335007C]

FX This study was funded by the German Ministry of Economics and Labour BMWi under the program "Energy-Optimized Building" (BMWi 0335007C).

Monitoring, data acquisition and commissioning is a challenging task.

The authors would sincerely like to thank the various evaluation teams

for excellent support, discussion and cooperation: I. Repke (FH Koln),

P. Obert, G. Mengedoht and G. Lindemann (FH Ulm), M. Ehlers and F.

Ghazai (JU Munchen), C. Sasse (TU BS), D. Schmidt and J. Kaiser

(Fraunhofer IBP), M. Kappert and C. Pechtl (FH Erfurt), R. Koenigsdorff

and S. Heinrich (Hochschule Biberach), T. Hausler (TU Cottbus), E.

Bollin (FH Offenburg), M. Melcher (Engelhardt & Bauer Druck Karlsruhe),

C. Stolzel (Variotec GmbH Neumarkt) and T. Knapp and B. Bagherian (TU

Karlsruhe).

CR \*AG, 1999, EN WAT CONS GERM

\*ASHRAE, 2004, 55200404 ASHRAE

\*CEN BT WG, 2006, EPBD CENBT WG

DIN, 2003, 410822003 DIN

\*DIN, 2002, V185991200702 DIN

\*DIN, 2001, 2771200501 DIN

\*DIN, 2007, V185991200702 DIN

EHLERS M, 2007, ENERGIEOPTIMIERTES B

\*ENOB, 2008, RES EN OPT CONSTR

\*ENSAN, 2008, EN OPT CONSTR REF

FISCH M, 2006, ABSCHLUSSBERICHT F E

HAUSER G, 2004, SOLAROPTIMIERTES BAU

HEINRICH S, 2008, 0335007P FORD

HEINRICH S, 2007, P GEOTH BOCH GERM

HERKEL S, 2006, P 11 INT PASS BREG A

\*IK, 1999, IK DAT VERS 3 1 FACH

Kalz DE, 2009, BUILD RES INF, V37, P413, DOI 10.1080/09613210902899751

KALZ DE, RENEWABLE ENER UNPUB

KALZ DE, 2007, HEIZEN KUHLEN THERMO

KAPPERT M, 2005, MESSPROGRAMM EVALUIE

LINDEMANN G, 2006, PASSIVHAUS ENERGEN U

PFAFFEROTT J, 2007, P AIVC 28 C PAL 2 C

RANFT F, 2007, NEUBAU ENERGETISCH O

\*VDI, 1994, 38071994 VDI

VOSS K, 2006, WAMBSGANSS BUROGEBAU

Voss K, 2007, SOL ENERGY, V81, P424, DOI 10.1016/j.solener.2006.04.008

WAGNER A, 2004, ENERGIEKENNWERTE GEB

WEBER L, 1999, ENERGIE BUROGEBAUDEN

WILLBOLD G, 1998, P IMP VDI K FRANKF

2008, ZUKUNFTBAU FORSCHUNG

NR 30  
 TC 18  
 Z9 18  
 U1 0  
 U2 7  
 PU ELSEVIER SCIENCE SA  
 PI LAUSANNE  
 PA PO BOX 564, 1001 LAUSANNE, SWITZERLAND  
 SN 0378-7788  
 J9 ENERGBUILDINGS  
 JI Energy Build.  
 PD OCT  
 PY 2009  
 VL 41  
 IS 10  
 BP 1019  
 EP 1030  
 DI 10.1016/j.enbuild.2009.05.004  
 PG 12  
 WC Construction & Building Technology; Energy & Fuels; Engineering, Civil  
 SC Construction & Building Technology; Energy & Fuels; Engineering  
 GA 497QY  
 UT WOS:000270076900003  
 DA 2018-05-03  
 ER

PT J  
 AU Huang, B  
 Mauerhofer, V  
 Geng, Y  
 AF Huang, Beijia  
 Mauerhofer, Volker  
 Geng, Yong  
 TI Analysis of existing building energy saving policies in Japan and China  
 SO JOURNAL OF CLEANER PRODUCTION  
 LA English  
 DT Article

DE Building; Energy saving policy; Obstacle  
 ID IMPLEMENTATION THEORY; EFFICIENCY; SUSTAINABILITY; REDUCTION

AB Building sector accounts for a large percentage of the total national energy consumption in most of the countries, thus it is critical to formulate and implement appropriate energy saving policies in the building sector. This paper focuses on energy saving policies in the building sector by conducting a comparative study between Japan and China. The existing Building Energy Saving (BES) policies, actual effectiveness of policy implementation and obstacles to the effective policy implementation are compared in sequence. Related policies are categorized into four groups: control and regulatory instruments; economic/market-based instruments; fiscal instruments and information and voluntary actions. Policy effect analysis identifies that BES policies have promoted building energy saving in both Japan and China. Obstacles comparison reveals that Japan and China shared many obstacles including high transaction costs and lack of applicable methodology. Compared with Japan, China is suffering more obstacles such as inefficient enforcement, insufficient levels of information and awareness and immature financial regulation system. Based on the previous findings, common suggestions for overcoming these obstacles of BES policies in Japan and China are presented, such as the accurate methods of baseline identification and emission accountings, innovative incentives, and more capacity building activities. Distinct suggestions for Japan and China are also added by considering their own situations so that both countries can further improve their BES policies. (C) 2015 Elsevier Ltd. All rights reserved.

C1 [Huang, Beijia] Univ Shanghai Sci & Technol, Coll Environm & Architecture, Shanghai, Peoples R China.  
 [Mauerhofer, Volker] Univ Vienna, Fac Life Sci, A-1010 Vienna, Austria.  
 [Mauerhofer, Volker] United Nations Univ, Inst Adv Study Sustainabil, Tokyo, Japan.

[Mauerhofer, Volker] Minist Agr Forestry & Fisheries, Policy Res Inst, Tokyo, Japan.

[Geng, Yong] Shanghai Jiao Tong Univ, Sch Environm Sci & Engrn, Shanghai 200030, Peoples R China.

RP Huang, B (reprint author), Univ Shanghai Sci & Technol, Coll Environm & Architecture, Shanghai, Peoples R China.

EM ywhbjia@gmail.com; volker.mauerhofer@gmx.at

RI Geng, Yong/B-6310-2018

OI Geng, Yong/0000-0002-2284-1375; Mauerhofer, Volker/0000-0002-5444-2619

FU National Natural Science Foundation of China [71403170, 71325006, 71461137008]

FX This study was supported by the National Natural Science Foundation of China (Grant Nos. 71403170, 71325006, 71461137008). The advice from Mrs. Yuko Nishida from the Bureau of Environment, Tokyo Metropolitan Government and Mr. Norichika Kanie from Tokyo Institute of Technology is highly valued. The authors are also thankful to Marlen S. Krause for her careful proofreading of an earlier version and helpful comments.

CR Agency of Natural Resources and Energy, 2011, EN CONS POL JAP  
Asia-Pacific Economic Cooperation, 2013, APEC BUILD COD REG S  
Carlford S, 2010, BMC FAM PRACT, V11, DOI 10.1186/1471-2296-11-60  
Cheng C., 2008, KYOTO PROTOCOL CLEAN  
Doshi T.K., 2013, PACIFIC ENERGY SUMMI  
Evans E., 2009, COUNTRY REPORT BUIL  
Geller H, 2006, ENERG POLICY, V34, P556, DOI 10.1016/j.enpol.2005.11.010  
Geng Y, 2012, ENVIRON SCI TECHNOL, V46, P107, DOI 10.1021/es204293x  
Geng Y, 2011, NATURE, V477, P162  
Guo B, 2014, ENERG POLICY, V74, P134, DOI 10.1016/j.enpol.2014.08.005  
Hashimoto K., 2013, POLICY PROGRAMS ENER  
Hilke A., 2012, MOBILIZING INVESTMEN  
Hirayama S., 2008, ACEEE SUMMER STUDY E  
Holum L.C., 2012, INT J INTEGR CARE, V12  
Huang BJ, 2012, J CLEAN PROD, V32, P244, DOI 10.1016/j.jclepro.2012.03.031  
Huang B.J., 2009, 2 INT S AQ SCI WAT R  
[Anonymous], 2008, EN EFF REQ BUILD COD  
IPCC, 2014, CLIM CHANG 2014 IMP  
Jiang P, 2013, J CLEAN PROD, V58, P112, DOI 10.1016/j.jclepro.2013.04.039  
Jiang Y., 2012, CHIN SCI TECHN ACH  
Kang B.K., 2007, CHINA BUILDING ENERG  
Kapsali M, 2011, TECHNOVATION, V31, P615, DOI 10.1016/j.technovation.2011.07.006  
Urge-Vorsatz D., 2007, ASSESSMENT POLICY IN  
Kono N., 2010, JAPANESE LOW CARBON  
Lau LC, 2009, ENERG POLICY, V37, P4771, DOI 10.1016/j.enpol.2009.06.034  
J Laustsen, 2008, ENERGY EFFICIENCY RE  
Lee WL, 2004, PROG ENERG COMBUST, V30, P477, DOI 10.1016/j.peccs.2004.03.002  
Levine M., 2012, BUILDING ENERGY EFFI  
Li J, 2009, J ENVIRON MANAGE, V90, P2436, DOI 10.1016/j.jenvman.2008.12.015  
Liu XB, 2013, APPL ENERG, V102, P1464, DOI 10.1016/j.apenergy.2012.09.008  
Ma A.Y., 2008, CHINESE FOREIGN COUN  
Mauerhofer V., 2008, ECOLOGICAL EC, V63, P496  
Michaelowa A, 2009, ENERG EFFIC, V2, P353, DOI [10.1007/s12053-009-9052-Z, 10.1007/s12053-009-9052-z]  
Mochizuki J, 2011, CLIM POLICY, V11, P1337, DOI 10.1080/14693062.2011.579289  
Nishida Y., 2011, BUILD RES INF, V5, P518  
Olivier JGJ, 2013, TRENDS GLOBAL CO2 EM  
Ouyang JL, 2009, ENERG POLICY, V37, P140, DOI 10.1016/j.enpol.2008.07.041  
Peer V, 2013, J CLEAN PROD, V44, P85, DOI 10.1016/j.jclepro.2012.12.003  
Perdan S, 2011, ENERG POLICY, V39, P6040, DOI 10.1016/j.enpol.2011.07.003  
Policy Innovations, 2012, JAP EN POL FUK  
Satou H., 2012, J COMMUNICATION COMP, V9, P1008  
Sven R., 2012, JOINT DISCUSSION PAP

Tokyo Metropolitan Government (TMG), 2011, PATH LOW CARB CIT TO  
 Tseng ML, 2013, J CLEAN PROD, V40, P1, DOI 10.1016/j.jclepro.2012.07.015  
 Ullrich PM, 2014, WORLDV EVID-BASED NU, V11, P26, DOI 10.1111/wvn.12016  
 UNEP-SBCI, 2007, ASS POL INSTR RED GR  
 Van Berkel R, 2009, J ENVIRON MANAGE, V90, P1544, DOI 10.1016/j.jenvman.2008.11.010  
 Zhang YR, 2013, ENERG POLICY, V62, P768, DOI 10.1016/j.enpol.2013.06.128

NR 48

TC 17

Z9 18

U1 0

U2 28

PU ELSEVIER SCI LTD

PI OXFORD

PA THE BOULEVARD, LANGFORD LANE, KIDLINGTON, OXFORD OX5 1GB, OXON, ENGLAND

SN 0959-6526

EI 1879-1786

J9 J CLEAN PROD

JI J. Clean Prod.

PD JAN 20

PY 2016

VL 112

BP 1510

EP 1518

DI 10.1016/j.jclepro.2015.07.041

PN 2

PG 9

WC GREEN & SUSTAINABLE SCIENCE & TECHNOLOGY; Engineering, Environmental;  
 Environmental Sciences

SC Science & Technology - Other Topics; Engineering; Environmental Sciences  
 & Ecology

GA DBOOG

UT WOS:000368206800025

DA 2018-05-03

ER

PT J

AU Zhou, ZH

Zhang, SZ

Wang, CD

Zuo, J

He, Q

Rameezdeen, R

AF Zhou, Zhihua

Zhang, Shuzhen

Wang, Chendong

Zuo, Jian

He, Qing

Rameezdeen, Raufdeen

TI Achieving energy efficient buildings via retrofitting of existing  
 buildings: a case study

SO JOURNAL OF CLEANER PRODUCTION

LA English

DT Article

DE Existing building; Retrofitting; Operation strategy; Indoor environment

ID RESIDENTIAL BUILDINGS; POLICY INSTRUMENTS; ECONOMIC-ANALYSIS; CHINA;  
 TECHNOLOGIES; PERFORMANCE; CONSUMPTION; SIMULATION; EMISSION; GERMANY

AB Retrofitting of existing buildings plays a critical role to achieve sustainable development. There are a number of factors that affect the effectiveness of building energy efficient retrofitting. These factors can be

broadly categorised as technology and management. A case study approach was employed in this study to examine effective ways of building energy efficient retrofitting based on one year of monitoring. Several feasible schemes of building energy efficient retrofitting were identified according to the characteristics of the case building. The best scheme was chosen according to results of simulation, comparison and analysis. The focuses of building energy efficient retrofitting were placed on energy conservation and indoor environment quality. In particular, during the operation stage, staff can regulate the terminal unit in accordance with their own demands. Results showed that the building operation can satisfy staff's individual requirements after the retrofit. Similarly, the annual energy consumption can be reduced by 57% compared to the national average of office buildings in China. These findings provide useful inputs for the future building energy efficient retrofitting practices as well as policy making process. (C) 2015 Elsevier Ltd. All rights reserved.

C1 [Zhou, Zhihua; Zhang, Shuzhen; Wang, Chendong] Tianjin Univ, Tianjin Key Lab Indoor Air Environm Qual Control, Sch Environm Sci & Engn, Tianjin 300072, Peoples R China.

[Zuo, Jian] Univ Adelaide, Sch Architecture & Built Environm, ECIC, Adelaide, SA 5005, Australia.

[He, Qing] Tenio Architecture & Engn Co, Beijing, Peoples R China.

[Rameezdeen, Raufdeen] Univ S Australia, Sch Nat & Built Environm, Adelaide, SA 5000, Australia.

RP Zuo, J (reprint author), Univ Adelaide, Sch Architecture & Built Environm, ECIC, Adelaide, SA 5005, Australia.

EM Jian.Zuo@adelaide.edu.au

RI Zuo, Jian/M-3223-2016; Rameezdeen, Rameez/F-4614-2013

OI Rameezdeen, Rameez/0000-0001-9639-2624; Zuo, Jian/0000-0002-8279-9666

FU Ministry of Science and Technology of the People's Republic of China

[2013BAJ09B01, 2015BAJ01B01]; Chinese Ministry for Environmental Protection [2013467070]

FX This work was supported by Ministry of Science and Technology of the People's Republic of China (Contract No. 2013BAJ09B01, 2015BAJ01B01), and environmental charity project funded by the Chinese Ministry for Environmental Protection (Contract No. 2013467070). The authors are thankful to anonymous reviewers for their valuable comments and feedback.

CR Amstalden RW, 2007, ENER POLICY, V35, P1819, DOI 10.1016/j.enpol.2006.05.018

Asadi E, 2012, ENER BUILDINGS, V44, P81, DOI 10.1016/j.enbuild.2011.10.016

Aynur TN, 2009, ENER BUILDINGS, V41, P1143, DOI 10.1016/j.enbuild.2009.05.011

Bao LL, 2012, ENER POLICY, V45, P521, DOI 10.1016/j.enpol.2012.02.065

Bruce T., 2015, STRUCT SURV, V33, P1

Chan HY, 2010, RENEW SUST ENER REV, V14, P781, DOI 10.1016/j.rser.2009.10.030

China society for urban studies, 2014, CHIN GREEN BUILD 201

Chowdhury S, 2014, ENER POLICY, V68, P285, DOI 10.1016/j.enpol.2014.01.023

Desmedt J, 2009, J CLEAN PROD, V17, P455, DOI 10.1016/j.jclepro.2008.08.017

Fiaschi D, 2012, APPL ENER, V97, P101, DOI 10.1016/j.apenergy.2012.03.008

General Office of the State Council of the People's Republic of China, 2013, ACT PLAN GREEN BUILD

Hepbasli A, 2003, ENER CONVERS MANAGE, V44, P527, DOI 10.1016/S0196-8904(02)00073-0

Huang BJ, 2012, J CLEAN PROD, V32, P244, DOI 10.1016/j.jclepro.2012.03.031

Huang Y, 2012, ENER BUILDINGS, V44, P94, DOI 10.1016/j.enbuild.2011.10.027

Jaffal I, 2012, RENEW ENER, V43, P157, DOI 10.1016/j.renene.2011.12.004

Jiang P, 2013, J CLEAN PROD, V58, P112, DOI 10.1016/j.jclepro.2013.04.039

Jiang Y, 2010, ANN REPORT CHINA BUI

Johannsdottir L, 2014, J CLEAN PROD, V65, P526, DOI 10.1016/j.jclepro.2013.09.043

Kibert C.J., 2008, SUSTAINABLE CONSTRUC

Kiss B, 2013, J CLEAN PROD, V48, P187, DOI 10.1016/j.jclepro.2012.12.016

Koester RJ, 2006, J CLEAN PROD, V14, P769, DOI 10.1016/j.jclepro.2005.11.055

Lester TW, 2013, ENER POLICY, V62, P809, DOI 10.1016/j.enpol.2013.07.050

Li J., 2014, J CLEAN PROD, V90, P326

Li X. H., 2011, SICHUAN BUILD SCI, V37, P250

Ma D., 2012, INN MONG SCI EC, V16, P14

Meng J, 2014, J CLEAN PROD, V68, P7, DOI 10.1016/j.jclepro.2013.12.045

MOHURD, 2005, GBT501892005 MOHURD

MOHURD, 2006, GBT503782006 MOHURD



MOHURD, 2015, STAND EN CONS BUILD

Newsham GR, 2009, ENERGBUILDINGS, V41, P897, DOI 10.1016/j.enbuild.2009.03.014

Ouyang JL, 2011, ENERGPOLICY, V39, P4902, DOI 10.1016/j.enpol.2011.06.025

Ouyang JL, 2009, ENERGPOLICY, V37, P140, DOI 10.1016/j.enpol.2008.07.041

Perez-Lombard L, 2011, ENERGBUILDINGS, V43, P255, DOI 10.1016/j.enbuild.2010.10.025

Russell-Smith SV, 2015, JCLEANPROD, V88, P43, DOI 10.1016/j.jclepro.2014.03.025

Scofield JH, 2013, ENERGBUILDINGS, V67, P517, DOI 10.1016/j.enbuild.2013.08.032

Tianjin Urban & Rural Construction Commission, 2010, DB291532010 TIANJ UR

Turner C., 2008, ENERGYPERFORMANCE L

U.S. Energy Information Administration, 2012, LEV COST NEW GEN RES

WANG F, 2007, BUILDSCI, V2

Wang L.F., 2013, HEILONGJIANGSCI TEC, V24, P197

Wang Y., 2001, BUILDENERGY ENV, V20, P12

Xu PP, 2011, ENERGPOLICY, V39, P7389, DOI 10.1016/j.enpol.2011.09.001

Zhang XL, 2013, RENEWSUSTENERG REV, V25, P78, DOI 10.1016/j.rser.2013.04.011

Zuo J, 2014, RENEWSUSTENERG REV, V30, P271, DOI 10.1016/j.rser.2013.10.021

Zuo J, 2012, HABITATINT, V36, P278, DOI 10.1016/j.habitatint.2011.10.010

NR 45

TC 17

Z9 17

U1 11

U2 48

PU ELSEVIER SCI LTD

PI OXFORD

PA THE BOULEVARD, LANGFORD LANE, KIDLINGTON, OXFORD OX5 1GB, OXON, ENGLAND

SN 0959-6526

EI 1879-1786

J9 J CLEAN PROD

J I J. Clean Prod.

PD JAN 20

PY 2016

VL 112

BP 3605

EP 3615

DI 10.1016/j.jclepro.2015.09.046

PN 5

PG 11

WC GREEN & SUSTAINABLE SCIENCE & TECHNOLOGY; Engineering, Environmental;  
Environmental Sciences

SC Science & Technology - Other Topics; Engineering; Environmental Sciences  
& Ecology

GA DBOON

UT WOS:000368207500002

DA 2018-05-03

ER

PT J

AU Drochytka, R

Zach, J

Korjenic, A

Hroudova, J

AF Drochytka, Rostislav

Zach, Jiri

Korjenic, Azra

Hroudova, Jitka

TI Improving the energy efficiency in buildings while reducing the waste  
using autoclaved aerated concrete made from power industry waste

SO ENERGY AND BUILDINGS

LA English

DT Article

DE Aerated concrete; Industrial waste; Building; Insulation; Sorption;  
Energy saving

AB Production of autoclaved aerated concrete (AAC) from power industry waste cinders represents a progressive technology for processing of industrial waste in a new form of building material with good qualities. Despite these positive aspects, the share of cinder concrete in the building industry is less popular. The low popularity is partially caused by the poor aesthetic of cinder concrete in comparison with sand-based AAC; however, the main cause is the slightly smaller thermal and moisture qualities of fly ash-based AAC, respecting uncertainty because there are no supporting scientific research and publications about it. This paper is dedicated to a study of the thermal and moisture properties of the cinder concrete and mutual behaviour with the sand-based AAC. It was determined that fly ash-based AAC demonstrated slightly larger moisture sorption in comparison with sand-based concrete under similar conditions. On the contrary, the thermal insulating properties of fly ash-based concrete, as indicated by the heat conductivity, exhibits less moisture influence in comparison with sand-based AAC. Concerning volume changes, fly ash-based AAC showed, in the condition of low moisture, slightly better properties when compared with autoclaved aerated sand concrete. (C) 2012 Elsevier B.V. All rights reserved.

C1 [Drochytka, Rostislav; Zach, Jiri; Hroudova, Jitka] Brno Univ Technol, Fac Civil Engn, Inst Technol Bldg Mat & Components, Brno 60200, Czech Republic.

[Korjenic, Azra] Vienna Univ Technol, Inst Bldg Construct & Technol, Res Ctr Bldg Phys & Sound Protect, A-1040 Vienna, Austria.

RP Korjenic, A (reprint author), Vienna Univ Technol, Inst Bldg Construct & Technol, Res Ctr Bldg Phys & Sound Protect, Karlspl 13-206-2, A-1040 Vienna, Austria.

EM azra.korjenic@tuwien.ac.at

OI Korjenic, Azra/0000-0002-2904-9532

FU advance building material centre [GACR 103/09/0016]; European Social Funds, Operational programme Education for Competitiveness

FX This research was supported by the project of GACR 103/09/0016 and project SUPMAT - Promotion of further education of research workers from advance building material centre. Registration number:

CZ.1.07/2.3.00/20.0111, funded by European Social Funds, Operational programme Education for Competitiveness.

CR Balaras CA, 2000, ENERGBUILDINGS, V31, P143, DOI 10.1016/S0378-7788(99)00028-6

[Anonymous], 1992, 731356 CSN

[Anonymous], 1994, 7270123 CSN

[Anonymous], 2001, 77213 CSNEN

[Anonymous], 2001, 12571 CSN EN ISO

Drochytka R., 1999, PUBLICATION BRNO U T, V2572

Ghazi Wakili K, 2003, ENERGBUILDINGS, V35, P675, DOI 10.1016/S0378-7788(02)00209-8

Huberman N, 2008, ENERGBUILDINGS, V40, P837, DOI 10.1016/j.enbuild.2007.06.002

[Anonymous], 1991, 8301 ISO

[Anonymous], 1991, 8302 ISO

Kearsley EP, 2001, CEMENT CONCRETE RES, V31, P805, DOI 10.1016/S0008-8846(01)00490-2

Korjenic A, 2012, ENERGBUILDINGS, V47, P254, DOI 10.1016/j.enbuild.2011.11.045

Korjenic A, 2011, ENERGBUILDINGS, V43, P3189, DOI 10.1016/j.enbuild.2011.08.017

Korjenic A, 2011, ENERGBUILDINGS, V43, P2518, DOI 10.1016/j.enbuild.2011.06.012

Koronthalyova O, 2011, CONSTR BUILD MATER, V25, P879, DOI 10.1016/j.conbuildmat.2010.06.098

Kurama H, 2009, J MATER PROCESS TECH, V209, P767, DOI 10.1016/j.jmatprotec.2008.02.044

Kus H, 2003, CEMENT CONCRETE RES, V33, P1423, DOI 10.1016/S0008-8846(03)00084-X

Nielsen L.G., 2007, SERIES BYG REP

Olofsson T, 2001, ENERGBUILDINGS, V33, P85, DOI 10.1016/S0378-7788(00)00068-2

Radhi H, 2011, ENERGBUILDINGS, V43, P2086, DOI 10.1016/j.enbuild.2011.04.018

Stastnik S., 2002, TESTING INSULATING MA

Todorovic MS, 2012, ENERGBUILDINGS, V47, P12, DOI 10.1016/j.enbuild.2011.11.013

USGBC LEED, 2006, NEW CONSTR MAJ REN R

Vern L.S., 2011, USE GREEN BUILDING M

Zach J., 2006, WTA C CZECH REP

NR 25

TC 17  
 Z9 20  
 U1 2  
 U2 47  
 PU ELSEVIER SCIENCE SA  
 PI LAUSANNE  
 PA PO BOX 564, 1001 LAUSANNE, SWITZERLAND  
 SN 0378-7788  
 J9 ENERGBUILDINGS  
 JI Energy Build.  
 PD MAR  
 PY 2013  
 VL 58  
 BP 319  
 EP 323  
 DI 10.1016/j.enbuild.2012.10.029  
 PG 5  
 WC Construction & Building Technology; Energy & Fuels; Engineering, Civil  
 SC Construction & Building Technology; Energy & Fuels; Engineering  
 GA 112GH  
 UT WOS:000316580200032  
 DA 2018-05-03  
 ER

PT J  
 AU Kobus, CBA  
 Mugge, R  
 Schoormans, JPL  
 AF Kobus, Charlotte B. A.  
 Mugge, Ruth  
 Schoormans, Jan P. L.  
 TI Washing when the sun is shining! How users interact with a household  
 energy management system

SO ERGONOMICS

LA English

DT Article

DE energy management system; electricity consumption

ID FEEDBACK; CONSERVATION; BEHAVIOR; INTERVENTION; PRODUCTS; DESIGN

AB To make optimal use of sustainable energy, domestic electricity consumption should shift to match local supply conditions. Energy management systems (EMS) are a new sustainable technology that can help to disrupt consumers' habits concerning electricity consumption, whilst reinforcing desired behaviours. This research examined the factors that influence the likelihood that people will shift their electricity consumption to match sustainable supply. Twenty-one interviews were conducted with households who had used the EMS Smart Wash' for several months. The findings showed that the likelihood of behaviour change is influenced by a combination of the user's motivation, specific contextual factors and the design of the EMS. Based on these results, several recommendations are given for the future design of EMSs. Practitioner Summary: Energy management systems (EMS) are a new technology that encourages people to shift electricity consumption to match local solar supply. Interviews among users of an EMS showed that the likelihood of behaviour change is influenced by the combination of the user's motivation, contextual factors and the EMS design.

C1 [Kobus, Charlotte B. A.] Delft Univ Technol, Enexis BV, NL-5201 AW Shertogenbosch, Netherlands.  
 [Mugge, Ruth; Schoormans, Jan P. L.] Delft Univ Technol, Dept Prod Innovat Management, NL-2628 CE Delft, Netherlands.

RP Kobus, CBA (reprint author), Delft Univ Technol, Enexis BV, POB 856, NL-5201 AW Shertogenbosch, Netherlands.

EM Charlotte.CBA.Kobus@Enexis.nl

CR Abrahamse W, 2005, J ENVIRON PSYCHOL, V25, P273, DOI 10.1016/j.jenvp.2005.08.002

Abrahamse W, 2007, J ENVIRON PSYCHOL, V27, P265, DOI 10.1016/j.jenvp.2007.08.002

Abrahamse W, 2009, J ECON PSYCHOL, V30, P711, DOI 10.1016/j.joep.2009.05.006  
 BAGOZZI RP, 1982, J MARKETING RES, V19, P562, DOI 10.2307/3151727  
 BANDURA A, 1977, PSYCHOL REV, V84, P191, DOI 10.1037//0033-295X.84.2.191  
 Bauer S. R., 1995, DESIGN MANAGEMENT J, V6, P21  
 Baumeister RF, 2007, PERS SOC PSYCHOL REV, V11, P167, DOI 10.1177/1088868307301033  
 CBS, 2011, MON DUURZ NED 2011  
 Cialdini R. B., 1993, INFLUENCE PSYCHOL PE  
 Darby S, 2010, BUILD RES INF, V38, P442, DOI 10.1080/09613218.2010.492660  
 Derijcke E., 2006, USER BEHAV TECHNOLOG, P119  
 Dey I., 1993, QUALITATIVE DATA ANA  
 Faruqui A, 2010, ENERGY, V35, P1598, DOI 10.1016/j.energy.2009.07.042  
 Fischer C, 2008, ENER EFFIC, V1, P79, DOI 10.1007/s12053-008-9009-7  
 Fiske S., 1991, SOCIAL COGNITION  
 Fogg B. J., 2003, PERSUASIVE TECHNOLOG  
 Guest G, 2006, FIELD METHOD, V18, P59, DOI 10.1177/1525822X05279903  
 Jeong KA, 2010, ERGONOMICS, V53, P636, DOI 10.1080/00140130903581623  
 Kaiser FG, 2005, J APPL SOC PSYCHOL, V35, P2150, DOI 10.1111/j.1559-1816.2005.tb02213.x  
 Kobsa A, 2002, COMMUN ACM, V45, P64  
 Locke EA, 2002, AM PSYCHOL, V57, P705, DOI 10.1037//0003-066X.57.9.705  
 Lockton D, 2010, APPL ERGON, V41, P382, DOI 10.1016/j.apergo.2009.09.001  
 McCalley LT, 2002, J ECON PSYCHOL, V23, P589, DOI 10.1016/S0167-4870(02)00119-8  
 Muir BM, 1996, ERGONOMICS, V39, P429, DOI 10.1080/00140139608964474  
 Rijdsdijk SA, 2003, J PROD INNOVAT MANAG, V20, P204, DOI 10.1111/1540-5885.2003003  
 Rijdsdijk SA, 2007, J ACAD MARKET SCI, V35, P340, DOI 10.1007/s11747-007-0040-6  
 Rijdsdijk SA, 2009, J PROD INNOVAT MANAG, V26, P24, DOI 10.1111/j.1540-5885.2009.00332.x  
 Rogers EM, 1995, DIFFUSION INNOVATION  
 Sauer J, 2004, ERGONOMICS, V47, P1053, DOI 10.1080/00140130410001686302  
 VANHOUWELINGEN JH, 1989, J CONSUM RES, V16, P98, DOI 10.1086/209197  
 Verplanken B., 1999, EUROPEAN REV SOCIAL, V10, P101, DOI DOI 10.1080/14792779943000035  
 Verplanken B, 2006, J PUBLIC POLICY MARK, V25, P90, DOI 10.1509/jppm.25.1.90  
 Watson A., 2002, MARKETING INTELLIGEN, V20, P394  
 Wilson JR, 2000, APPL ERGON, V31, P557, DOI 10.1016/S0003-6870(00)00034-X

NR 34

TC 17

Z9 17

U1 0

U2 28

PU TAYLOR &amp; FRANCIS LTD

PI ABINGDON

PA 4 PARK SQUARE, MILTON PARK, ABINGDON OX14 4RN, OXON, ENGLAND

SN 0014-0139

J9 ERGONOMICS

JI Ergonomics

PD MAR 1

PY 2013

VL 56

IS 3

SI SI

BP 451

EP 462

DI 10.1080/00140139.2012.721522

PG 12

WC Engineering, Industrial; Ergonomics; Psychology, Applied; Psychology

SC Engineering; Psychology

GA 121WH

UT WOS:000317275100010

PM 23009607

DA 2018-05-03

ER

PT J

AU Desideri, U

Leonardi, D

Arcioni, L

Sdringola, P

AF Desideri, Umberto

Leonardi, Daniela

Arcioni, Livia

Sdringola, Paolo

TI European project Educa-RUE: An example of energy efficiency paths in educational buildings

SO APPLIED ENERGY

LA English

DT Article; Proceedings Paper

CT 3rd International Conference on Applied Energy (ICAE)

CY MAY 16-18, 2011

CL Perugia, ITALY

DE European project; Educational buildings; Energy efficiency

ID CONSUMPTION

AB The aim of Educa-RUE project is to improve energy performance in building sector at local level and with particular attention to educational buildings, by promoting the ability of local players to guide and orient initiatives, designed to encourage energy saving by means of specific measures and integrated tools.

The project is therefore focused to speed up the implementation of European Directive on Energy Performance in Buildings, EPBD (2002/91/EC), in Member States at local government level and to ensure its operability, within the various national legislations of reference.

Educa-RUE lasted 30 months, from January 2008 to June 2010, and involved the following eight partners: for Italy, Provinces of Potenza (project leader), Perugia, Rieti and Palermo; for other Countries, Climate Energy Ltd. Essex and Energy Solutions North West London (UK), Asociacion Aragonesa de Entidades Locales ASAEL (Spain), Municipality of Prenzlau (Germany).

A number of closely interconnected actions were carried on in eight Work Packages (WPs) to face the energy efficiency aspects identified as primary problems by the partners. The project developed a model process, known as "Educa-RUE method", to assess possible policies of intervention on educational buildings, owned or managed by each Partner.

In particular the Province of Perugia, leader of WP 2 and 5, provided guide lines and tools in order to: identify the state of the art of EPBD implementation and the main non-technological barriers, which are preventing its application at local level; select, within the Province/area patrimony, the most suitable educational building, to be used as a shining example to develop the following testing phases of the project; carry on an energy check, or audit, of selected buildings, by involving the educational community as user and active participant in the whole process; elaborate an executive project, concerning the description of all the building elements (structure, roof, heating/cooling plants, etc.) which need to be replaced/improved and the application of an energy/environmental assessment; plan refurbishing interventions for the rest of the school buildings directly managed by each Partner, according to specific priority selection criteria, which represents a guiding and coordinating act for those Administrations directly or indirectly interested in the Project.

This paper presents the results obtained by testing and proving Educa-RUE method in different regional areas. Its findings can be extended to other building typologies in order to create a reference model for local planners and responsible. (C) 2012 Elsevier Ltd. All rights reserved.

C1 [Desideri, Umberto; Leonardi, Daniela; Arcioni, Livia; Sdringola, Paolo] Univ Perugia, Dept Ind Engr, I-06125 Perugia, Italy.

RP Leonardi, D (reprint author), Univ Perugia, Dept Ind Engr, Via G Duranti 67, I-06125 Perugia, Italy.

EM leonardi@tre-eng.com

RI Desideri, Umberto/G-1394-2011

OI Desideri, Umberto/0000-0001-7360-5762; Sdringola,

Paolo/0000-0003-4402-2095

CR Butala V, 1999, ENERGETIC BUILDINGS, V29, P241, DOI 10.1016/S0378-7788(98)00062-0

Chung W, 2011, APPL ENERG, V88, P1470, DOI 10.1016/j.apenergy.2010.11.022

Desideri U, 2002, ENERG BUILDINGS, V34, P1003, DOI 10.1016/S0378-7788(02)00025-7

European Project Educa-RUE, 2007, 21 EUR PROJ ED RUE

Joudi A, 2011, APPL ENERG, V88, P4655, DOI 10.1016/j.apenergy.2011.06.002

Nair G, 2010, APPL ENERG, V87, P2411, DOI 10.1016/j.apenergy.2010.02.004

Popescu D, 2012, APPL ENERG, V89, P454, DOI 10.1016/j.apenergy.2011.08.015

Proietti S, 2003, P 15 INT C EFF COST

Provincial Education Office of Perugia, INF BAS MAN SCH YEAR

NR 9

TC 17

Z9 17

U1 3

U2 24

PU ELSEVIER SCI LTD

PI OXFORD

PA THE BOULEVARD, LANGFORD LANE, KIDLINGTON, OXFORD OX5 1GB, OXON, ENGLAND

SN 0306-2619

J9 APPL ENERG

J1 Appl. Energy

PD SEP

PY 2012

VL 97

SI SI

BP 384

EP 395

DI 10.1016/j.apenergy.2012.02.009

PG 12

WC Energy & Fuels; Engineering, Chemical

SC Energy & Fuels; Engineering

GA 984NC

UT WOS:000307196000046

DA 2018-05-03

ER

PT J

AU Corcoran, PM

Papai, F

Zoldi, A

AF Corcoran, PM

Papai, F

Zoldi, A

TI User interface technologies for home appliances and networks

SO IEEE TRANSACTIONS ON CONSUMER ELECTRONICS

LA English

DT Article

AB The design and implementation of portable, lightweight user-interfaces to provide access to remote embedded home-systems and home-networks is described. This paper is focussed on emerging standards in the consumer electronics field, including embedded-Java, the handheld device markup language (HDML) and remote frame buffer (RFB) technology as implemented in the public-domain virtual network computer (VNC.) software. A key goal of the present paper is to provide an objective technical assessment of the applicability of each of these technologies to the development of practical consumer appliances and handheld terminals providing enhanced user-access to the home environment.

C1 Natl Univ Ireland Univ Coll Galway, Dept Elect Engr, Galway, Ireland.

RP Corcoran, PM (reprint author), Natl Univ Ireland Univ Coll Galway, Dept Elect Engr, Galway, Ireland.

CR CORCORAN P, 1997, IEEE T CONSUMER NOV, P1063

CORCORAN PM, 1998, IEEE INT C CONS EL L

CORCORAN PM, 1996, IEEE T CONSUMER AUG

CUCOS A, 1998, IEEE INT C CONS EL L

DESBONNET J, 1997, IEEE T CONSUMER NOV, P1057

NR 5  
 TC 17  
 Z9 17  
 U1 0  
 U2 3  
 PU IEEE-INST ELECTRICAL ELECTRONICS ENGINEERS INC  
 PI NEW YORK  
 PA 345 E 47TH ST, NEW YORK, NY 10017-2394 USA  
 SN 0098-3063  
 J9 IEEE T CONSUM ELECTR  
 JI IEEE Trans. Consum. Electron.  
 PD AUG  
 PY 1998  
 VL 44  
 IS 3  
 BP 679  
 EP 685  
 DI 10.1109/30.713181  
 PG 7  
 WC Engineering, Electrical & Electronic; Telecommunications  
 SC Engineering; Telecommunications  
 GA 120UE  
 UT WOS:000075975100029  
 DA 2018-05-03  
 ER

PT J  
 AU Gruber, M  
     Truschel, A  
     Dalenback, JO  
 AF Gruber, Mattias  
     Truschel, Anders  
     Dalenback, Jan-Olof  
 TI Energy efficient climate control in office buildings without giving up  
     implementability  
 SO APPLIED ENERGY  
 LA English  
 DT Article

DE Office buildings; Indoor climate control; Implementability; Air-based  
 heating and cooling; Energy efficiency; Model-based controller

ID MODEL-PREDICTIVE CONTROL; COMMERCIAL BUILDINGS; SYSTEM; PERFORMANCE;  
 IDENTIFICATION; RECOVERY; HVAC

AB The adaptation between a building and its automation system can potentially be increased by model-based controllers with an integrated control model and information about indoor climate disturbances. The associated energy savings potential is large but a widespread utilization is typically prevented by high complexities. From that point of view, a trade-off technology that combines implementability with an overall higher performance than the system of current practice would be a better option at most sites. This work presents an experimental evaluation of an alternative controller that follows the same principle as model-based, but has gone through a large number of simplification measures for a reduced overall complexity and a limited function. The controller was evaluated for indoor climate control by automating the ventilation flow rate during a typical office working day that was re-created in a laboratory environment. Experiments were conducted in two different office sites, as well as during two weather seasons of Swedish summer and winter. From the investigation, it was concluded that despite of the reduced complexity, the investigated controller could save between 12% and 19% of indicated energy compared to a system of common practice at the same time as the quality of indoor climate was maintained. (C) 2015 Elsevier Ltd. All rights reserved.

C1 [Gruber, Mattias] ESBE AB, S-33021 Reftele, Sweden.

[Gruber, Mattias; Truschel, Anders; Dalenback, Jan-Olof] Chalmers, Energy & Environm, Bldg Serv Engn, Gothenburg, Sweden.

RP Gruber, M (reprint author), ESBE, Bruksgatan 22, S-33021 Reftele, Sweden.

EM mattias.gruber@esbe.eu

OI Truschel, Anders/0000-0002-2951-8378; Dalenback,

Jan-Olof/0000-0001-8771-0416

FU department of Energy & Environment, Chalmers University of Technology

FX Funding of this research has been provided by the department of Energy &

Environment, Chalmers University of Technology.

CR [Anonymous], 2013, 20092 AFS

ASHRAE, 2007, 6212007 ASHRAE

ASHRAE, 2004, 552004 ASHRAE

[Anonymous], 2011, 19 BBR

Belok, 2011, EN REQ COMM BUILD

Blomqvist C, 2004, AIR MOVEMENT HORIZON

Castilla M., 2010, ENERGBUILDINGS, V43, P2737

Dobbs JR, 2014, ENERGBUILDINGS, V82, P675, DOI 10.1016/j.enbuild.2014.07.051

Ekberg L, 2006, R1 VVS TEKNISKA FORE

El Fouih Y, 2012, ENERGBUILDINGS, V54, P29, DOI 10.1016/j.enbuild.2012.08.008

[Anonymous], 2007, EN15251

Fanger P.O., 1970, THERMAL COMFORT

Goyal S, 2013, APPL ENERGBUILDINGS, V106, P209, DOI 10.1016/j.apenergy.2013.01.039

Gruber M., 2012, THESIS CHALMERS U TE

Gruber M., 2013, ENERGBUILDINGS A, V68, P213

Gruber M, 2014, BUILD ENVIRON, V82, P228, DOI 10.1016/j.buildenv.2014.08.023

Hagglund T., 2008, PRAKTISH PROCESS REG

Huang H, 2015, BUILD ENVIRON, V89, P203, DOI 10.1016/j.buildenv.2015.01.037

Huang H, 2015, ENERGBUILDINGS, V97, P86, DOI 10.1016/j.enbuild.2015.03.045

[Anonymous], 2008, EN EFF REQ BUILD COD

International Organization for Standardization, 2005, 77302005 ISO

Jagemar L., 2003, ACHIEVING DESIRED IN

Maasoumy M, 2014, ENERGBUILDINGS, V77, P377, DOI 10.1016/j.enbuild.2014.03.057

Maripuu M-L, 2009, THESIS CHALMERS U TE

Oldewurtel F, 2013, APPL ENERGBUILDINGS, V101, P521, DOI 10.1016/j.apenergy.2012.06.014

Oldewurtel F, 2012, ENERGBUILDINGS, V45, P15, DOI 10.1016/j.enbuild.2011.09.022

Paris B, 2010, ENERGBUILDINGS, V42, P1908, DOI 10.1016/j.enbuild.2010.05.027

Privara S., 2010, ENERGBUILDINGS, V43, P564

Siroky J, 2011, APPL ENERGBUILDINGS, V88, P3079, DOI 10.1016/j.apenergy.2011.03.009

[Anonymous], 2011, 124641 SSEN

Touretzky CR, 2014, J PROCESS CONTR, V24, P723, DOI 10.1016/j.jprocont.2013.09.022

Wang SW, 2006, INT J THERM SCI, V45, P419, DOI 10.1016/j.ijthermalsci.2005.06.009

West SR, 2014, ENERGBUILDINGS, V72, P271, DOI 10.1016/j.enbuild.2013.12.037

Zacekova E, 2014, APPL ENERGBUILDINGS, V135, P53, DOI 10.1016/j.apenergy.2014.08.004

Zhang X, 2013, 2013 EUR CONTR C

NR 35

TC 16

Z9 16

U1 1

U2 20

PU ELSEVIER SCI LTD

PI OXFORD

PA THE BOULEVARD, LANGFORD LANE, KIDLINGTON, OXFORD OX5 1GB, OXON, ENGLAND

SN 0306-2619

EI 1872-9118

J9 APPL ENERGBUILDINGS

J1 Appl. Energy

PD SEP 15

PY 2015



VL 154  
 BP 934  
 EP 943  
 DI 10.1016/j.apenergy.2015.05.075  
 PG 10  
 WC Energy & Fuels; Engineering, Chemical  
 SC Energy & Fuels; Engineering  
 GA CP4TI  
 UT WOS:000359875100087  
 DA 2018-05-03  
 ER

PT J

AU Azar, E  
 Menassa, CC

AF Azar, Elie  
 Menassa, Carol C.

TI Evaluating the impact of extreme energy use behavior on occupancy  
 interventions in commercial buildings

SO ENERGY AND BUILDINGS

LA English

DT Article

DE Extremism; Occupancy interventions; Energy conservation; Extreme energy  
 use characteristics and behaviors; Commercial buildings

ID SOCIAL NETWORKS; ENVIRONMENTAL BEHAVIOR; DECISION-MAKING; DYNAMICS;  
 FRAMEWORK; CONSERVATION; PROPAGATION; OPINION

AB Occupancy interventions, which are typically used to diffuse energy conservation practices among commercial building occupants, are showing promising but un-sustained energy savings. One possible explanation to the observed results is the presence of extreme energy users in the buildings who can have an important influence on their moderate peers and revoke the benefits of occupancy interventions. While this 'extremism' in human behavior phenomenon has been extensively studied in various social science fields, it has yet to be applied on the study of energy conservation from occupancy interventions in commercial buildings. Using agent-based modeling and data from actual commercial buildings, this paper evaluates the influence of extreme energy users (1) on their peers and on the energy performance of commercial buildings and (2) on the effectiveness of commonly implemented occupancy interventions. Parametric variations and statistical analyses indicate that extremism can highly affect the effectiveness of traditional occupancy interventions. In parallel, a combination of methods has shown to empower moderate energy users, helping diffuse and maintain energy conservation practices even in the presence of extreme energy users. The demonstrated capability to test and optimize occupancy interventions is expected to support and boost their adoption in large-scale energy conservation initiatives. (C) 2015 Elsevier B.V. All rights reserved.

C1 [Azar, Elie] Masdar Inst Sci & Technol, Dept Engrn Syst & Management, Abu Dhabi, U Arab Emirates.  
 [Menassa, Carol C.] Univ Michigan, Dept Civil & Environm Engrn, Ann Arbor, MI 48109 USA.

RP Menassa, CC (reprint author), Univ Michigan, Dept Civil & Environm Engrn, Ann Arbor, MI 48109 USA.  
 EM eazar@masdar.ac.ae; menassa@umich.edu

FU US National Science Foundation (NSF) [CBET 1407908, CMMI-BRIGE 1414855];  
 Wisconsin Alumni Research Foundation (WARF)

FX The authors would like to acknowledge the financial support for this research received from the US National Science Foundation (NSF) CBET 1407908 and CMMI-BRIGE 1414855 awards, and the Wisconsin Alumni Research Foundation (WARF). Any opinions and findings in this paper are those of the authors and do not necessarily represent those of NSF or WARF.

CR Allcott H, 2010, SCIENCE, V327, P1204, DOI 10.1126/science.1180775

Amblard F, 2004, PHYSICA A, V343, P725, DOI 10.1016/j.physa.2004.06.102

Anderson K., 2013, J COMPUT CIVIL ENG, V28, P30

Apolloni A, 2011, ADV COMPLEX SYST, V14, P151, DOI 10.1142/S0219525911003037

Atran S, 2003, SCIENCE, V299, P1534, DOI 10.1126/science.1078854

Azar E, 2014, ENERG POLICY, V67, P459, DOI 10.1016/j.enpol.2013.12.031

- Azar E, 2014, J COMPUT CIVIL ENG, V28, P63, DOI 10.1061/(ASCE)CP.1943-5487.0000318
- Azar E, 2012, ENERG BUILDINGS, V55, P841, DOI 10.1016/j.enbuild.2012.10.002
- Bartels G., 2002, MARKETING SUSTAINABI
- Carrico AR, 2011, J ENVIRON PSYCHOL, V31, P1, DOI 10.1016/j.jenvp.2010.11.004
- Commission of the European Communities (CEC), 2006, COMM COMM ACT PLAN E
- Chen JY, 2012, ENERG BUILDINGS, V47, P515, DOI 10.1016/j.enbuild.2011.12.026
- Deffuant G., 2002, ARTIFICIAL SOC SOCIA, V5, P1
- Edmonds B., 2007, ADV NEW DISCOVERIES
- eQuest, 2009, INTR TUT VERS 3 63
- Faruqui A, 2010, ENERGY, V35, P1598, DOI 10.1016/j.energy.2009.07.042
- Franks DW, 2008, ADAPT BEHAV, V16, P264, DOI 10.1177/1059712308090536
- Frenken K, 2007, J ECON GEOGR, V7, P635, DOI 10.1093/jeg/lbm018
- Garcia-Valdecasas J.I., 2013, REV ESPAN INVESTIG S, V142, P25
- Gargiulo F., 2008, ARTIFICIAL SOC SOCIAL, V11
- Gilbert GN., 2008, AGENT BASED MODELS
- Gockeritz S, 2010, EUR J SOC PSYCHOL, V40, P514, DOI 10.1002/ejsp.643
- Groeber P., 2009, ARTIF SOC SOC SIMUL, V12, P1
- Gumm KE, 2012, INF SECUR J, V21, P115, DOI 10.1080/19393555.2011.647251
- Jackson T., 2005, MOTIVATING SUSTAINAB
- Kurmyshev E, 2011, PHYSICA A, V390, P2945, DOI 10.1016/j.physa.2011.03.037
- Lopes MAR, 2012, RENEW SUST ENERG REV, V16, P4095, DOI 10.1016/j.rser.2012.03.034
- Martins A., 2008, PHYS REV E, V78
- Mason WA, 2007, PERS SOC PSYCHOL REV, V11, P279, DOI 10.1177/1088868307301032
- Masoso OT, 2010, ENERG BUILDINGS, V42, P173, DOI 10.1016/j.enbuild.2009.08.009
- McKenzie-Mohr D, 2000, J SOC ISSUES, V56, P543, DOI 10.1111/0022-4537.00183
- Moscovici S., 1986, HDB SOCIAL PSYCHOL, V2, P347
- Murtagh N, 2013, ENERG POLICY, V62, P717, DOI 10.1016/j.enpol.2013.07.090
- Oreszczyn T, 2010, BUILD RES INF, V38, P107, DOI 10.1080/09613210903265432
- Peschiera G, 2010, ENERG BUILDINGS, V42, P1329, DOI 10.1016/j.enbuild.2010.03.001
- Pickens P. M., 2002, COMMUNITY BASED SOCI
- Rogers EM, 1995, DIFFUSION INNOVATION
- Sailer K, 2012, SOC NETWORKS, V34, P47, DOI 10.1016/j.socnet.2011.05.005
- SALZARULO L, 2006, J ARTIF SOC SOC SIMU, V9
- Saporito A, 2001, ENERG BUILDINGS, V33, P267, DOI 10.1016/S0378-7788(00)00091-8
- Squillante M, 2010, INT J INTELL SYST, V25, P225, DOI 10.1002/int.20397
- Staats H, 2000, J APPL BEHAV ANAL, V33, P101, DOI 10.1901/jaba.2000.33-101
- Staats H, 2004, ENVIRON BEHAV, V36, P341, DOI 10.1177/0013916503260163
- Steg L, 2009, J ENVIRON PSYCHOL, V29, P309, DOI 10.1016/j.jenvp.2008.10.004
- US Department of Energy (DOE), 2014, BUILD EN SOFTW TOOL
- US Energy Information Agency (EIA), 2013, 2013 ANN EN OUTL
- U. S. Energy Information Administration, 2003, COMM BUILD EN CONS S
- Verplanken B, 2006, J PUBLIC POLICY MARK, V25, P90, DOI 10.1509/jppm.25.1.90
- Wasserman S, 1994, SOCIAL NETWORK ANAL
- Webber CA, 2006, ENERGY, V31, P2823, DOI 10.1016/j.energy.2005.11.007
- Weenig W.H., 1991, J PERS SOC PSYCHOL, V61, P734
- XJ Technologies, 2009, AN OV
- Yeung YY, 2005, AM J PHYS, V73, P145, DOI 10.1119/1.1775799

NR 53

TC 16

Z9 16

U1 4

U2 17

PU ELSEVIER SCIENCE SA

PI LAUSANNE

PA PO BOX 564, 1001 LAUSANNE, SWITZERLAND

SN 0378-7788

EI 1872-6178

J9 ENERG BUILDINGS

JI Energy Build.  
PD JUN 15  
PY 2015  
VL 97  
BP 205  
EP 218  
DI 10.1016/j.enbuild.2015.03.059  
PG 14  
WC Construction & Building Technology; Energy & Fuels; Engineering, Civil  
SC Construction & Building Technology; Energy & Fuels; Engineering  
GA CL8KB  
UT WOS:000357222500022  
DA 2018-05-03  
ER

PT J  
AU Liu, YM  
    Guo, X  
    Hu, FL  
AF Liu, Yuming  
    Guo, Xia  
    Hu, Feiling  
TI Cost-benefit analysis on green building energy efficiency technology  
    application: A case in China  
SO ENERGY AND BUILDINGS  
LA English  
DT Article  
DE Green buildings; Energy efficiency technology application; Cost-benefit  
    evaluation; Incremental costs; Incremental benefits  
ID DWELLINGS; IMPACT

AB In order to initiate economic evaluation of green buildings and foster their development, this article conducts the cost-benefit evaluation of energy efficiency technology application (EETA) on green buildings in China. Based on the economic evaluation theory of construction project (EETCP), the authors first establishes the theoretical framework system of cost-benefit evaluation of the EETA on green buildings and then develops the analysis methods of incremental costs and quantitative calculation formula of incremental benefits of the EETA on green buildings. Using these theories and methods, this article takes the Wanke City project in China as a study case, conducts the cost-benefit empirical analysis of the EETA on green buildings, and draws the following important conclusions: (1) the incremental costs of the EETA account for a large proportion of total incremental costs of green buildings, which are more than 50% in this case; (2) the EETA on green buildings can bring incremental economic benefits, as well as environmental benefits; (3) if only consider the incremental economic benefits of the EETA on green buildings, the financial evaluation indexes show green buildings do not have market investment potential; (4) among all the factors influencing the financial evaluation results of the EETA on green buildings, power price is the most sensitive factor, followed by the unit incremental costs, and the lifetime has the smallest influence. (C) 2014 Elsevier B.V. All rights reserved.

C1 [Liu, Yuming] Beijing Jiaotong Univ, Sch Econ & Management, Beijing 100044, Peoples R China.

[Guo, Xia] Beijing Union Univ, Coll Biochem Engr, Beijing 100023, Peoples R China.

[Hu, Feiling] Duquesne Univ, Sch Business, Pittsburgh, PA 15282 USA.

RP Liu, YM (reprint author), Beijing Jiaotong Univ, Sch Econ & Management, Beijing 100044, Peoples R China.

EM ymliu@bjtu.edu.cn

FU Beijing Planning Project Fund of Philosophy and Social Science

[10BaJG368]; Natural Science Foundation of China [71173011]

FX The first author would like to thank for the support in part from Beijing Planning Project Fund of Philosophy and Social Science (10BaJG368) and Natural Science Foundation of China (71173011). The authors would also like to express great appreciation to professor Sudong Ye from Beijing Jiaotong University, associate professor Pinar

- Celikkol Geylani from Duquesne University for their sincere help.
- CR Cao S., 2010, CONSTRUCTION EC, V1, P54
- Chai Hong-xiang, 2010, Journal of South China University of Technology, V38, P59, DOI 10.3969/j.issn.1000-565X.2010.11.011
- Chel A., 2009, ENER G BUILDINGS, V41, P1172, DOI 10.1016/j.enbuild.2009.06.004
- Cheng Zhi-jun, 2012, Journal of Central South University (Science and Technology), V43, P283
- Du S.H., 2007, THESIS CHONGQING U C, P38
- Gaterell MR, 2005, ENER G BUILDINGS, V37, P1017, DOI 10.1016/j.enbuild.2004.12.004
- Kats G., 2003, COSTS FINANCIAL BENE
- Ke H., 2012, COST VALUATION CONTR, P118
- Kneifel J, 2010, ENER G BUILDINGS, V42, P333, DOI 10.1016/j.enbuild.2009.09.011
- Li J., 2011, J ENG MANAGEMENT, V25, P487
- Li Y.Z., 2009, BUILDING SCI, V25, P76
- Liu Y.M., 2009, J BEIJING JIAOTONG U, V9, P52
- Liu YM, 2013, ENER G BUILDINGS, V61, P61, DOI 10.1016/j.enbuild.2013.01.033
- [??? Liu Yuming], 2011, [??????, China Civil Engineering Journal], V44, P118
- MOHURD, 2012, 12 5 YEAR SPEC PLANN
- MOHURD, 2013, REP BUILD EN EFF SPE
- MOHURD, 2010, JGJ262010 MOHURD, P5
- Morris P., 2013, COST GREEN REVISITED
- Morrissey J, 2011, ENER G BUILDINGS, V43, P915, DOI 10.1016/j.enbuild.2010.12.013
- Nalewaik A., 2009, COST ENG, V51, P28
- National Legal Aid, 2006, COMMUNICATION, P5
- Papadopoulos AM, 2002, ENER G BUILDINGS, V34, P455, DOI 10.1016/S0378-7788(01)00129-3
- Ministry of Housing and Urban-Rural Development of the People's Republic of China (MOHURD), 2006, GBT503782006 MIN HOU
- Ries R., 2006, Engineering Economist, V51, P259, DOI 10.1080/00137910600865469
- Sun Da ming, 2009, CONSTRUCTION SCI TEC, V6, P34
- Sun J.M., 2007, J SHANDONG JIANZHU U, V22, P31
- Verbeeck G, 2005, ENER G BUILDINGS, V37, P747, DOI 10.1016/j.enbuild.2004.10.003
- Wang G., 2006, J CHEM IND ENG PROGR, V25, P1467
- Wen Y.Z., 2011, THESIS CHANGAN U XIA, P29
- Wu Q.Y., 2011, THESIS BEIJING JIAOT, P26
- Xiao D.k., 2012, BUILDING ELECT, V31, P21
- Xiamen Energy Consumption Conservation (XMECC), 2012, REF COEFF VAR KINDS
- Zhai Y., 2010, THESIS TIANJIN U TIA, P15
- Zhang J.G., 2009, CHINA ENERGY, V31, P26
- Zhang J.G., 2009, CHINA ENERGY, V31, P23
- Zhang XL, 2011, BUILD ENVIRON, V46, P2153, DOI 10.1016/j.buildenv.2011.04.031
- Zheng Y.C.H., 2006, TECHNICAL GUIDEBOOK, P80
- NR 37
- TC 16
- Z9 16
- U1 6
- U2 47
- PU ELSEVIER SCIENCE SA
- PI LAUSANNE
- PA PO BOX 564, 1001 LAUSANNE, SWITZERLAND
- SN 0378-7788
- EI 1872-6178
- J9 ENER G BUILDINGS
- J1 Energy Build.
- PD OCT
- PY 2014
- VL 82
- BP 37
- EP 46
- DI 10.1016/j.enbuild.2014.07.008

PG 10

WC Construction & Building Technology; Energy & Fuels; Engineering, Civil

SC Construction & Building Technology; Energy & Fuels; Engineering

GA AR7SZ

UT WOS:000343781400004

DA 2018-05-03

ER

PT J

AU Vieira, AS

Beal, CD

Stewart, RA

AF Vieira, Abel S.

Beal, Cara D.

Stewart, Rodney A.

TI Residential water heaters in Brisbane, Australia: Thinking beyond  
technology selection to enhance energy efficiency and level of service

SO ENERGY AND BUILDINGS

LA English

DT Article

DE Residential buildings; Energy-water nexus; Solar hot water; Heat pump;

Electric water heater; Peak energy demand; Electricity tariffs

ID DOMESTIC HOT-WATER; ELECTRICITY CONSUMPTION; SYSTEMS; SOLAR; BUILDINGS;  
PUMP; TEMPERATURE; LEGIONELLA

AB A holistic approach to residential water heating systems specification is required to provide optimal energy efficiency. The objective of this study is to analyse the performance of residential water heating systems for the city of Brisbane in Australia, for different combinations of heating system technologies (solar, heat pump, electric), storage tank sizes (1251, 2501, 3251), time-distribution of energy in accordance to the tariff selection (all-day, controlled, night off-peak) and washing machine water heating sources (internal and external). Performance assessments considered the influence of 54 different water heating system configurations on the electricity grid (i.e. power peaks, time-distribution of energy according to electricity tariffs, and energy intensity), as well as their level of service (i.e. compliance rates with recommended hot water temperatures). Empirical water end use data from 27 households was utilised to model the performance of water heating systems. The study demonstrated that beyond merely specifying the type of technology (e.g. solar hot water), other key criteria such as hot water demand, hot water tank size and electricity tariff selection should also be considered in order to systematically optimise the energy and service performance of hot water systems in residential buildings. (C) 2014 Elsevier B.V. All rights reserved.

C1 [Vieira, Abel S.; Beal, Cara D.; Stewart, Rodney A.] Griffith Univ, Sch Engr, Southport, Qld 4222, Australia.

[Beal, Cara D.] Griffith Univ, Smart Water Res Ctr, Southport, Qld 4222, Australia.

RP Stewart, RA (reprint author), Griffith Univ, Sch Engr, Gold Coast Campus, Parklands Dr, Southport, Qld 4222, Australia.

EM r.stewart@griffith.edu.au

RI Beal, Cara/D-1138-2016

OI Beal, Cara/0000-0002-9219-2120

CR Alanne K, 2007, ENER BUILDINGS, V39, P1218, DOI 10.1016/j.enbuild.2007.01.009

Arpke A, 2006, J IND ECOL, V10, P169, DOI 10.1162/108819806775545312

[Anonymous], 2003, 35004 ASNZS

Australia, 2010, PLUMB REF GUID SOL H

Aye L, 2002, SOL ENERGY, V73, P169, DOI 10.1016/S0038-092X(02)00043-9

Bargellini A, 2011, WATER RES, V45, P2315, DOI 10.1016/j.watres.2011.01.009

Beal CD, 2014, J WATER RES PLAN MAN, V140, DOI 10.1061/(ASCE)WR.1943-5452.0000357

Beal CD, 2012, ENER BUILDINGS, V55, P422, DOI 10.1016/j.enbuild.2012.08.004

Beal C.D., 2011, 47 URB WAT SEC RES A

Boait PJ, 2012, ENER BUILDINGS, V54, P160, DOI 10.1016/j.enbuild.2012.07.011

Bojic M, 2011, APPL ENER, V88, P2407, DOI 10.1016/j.apenergy.2011.01.011

Brahme R., 2008, 3 NAT C IBPSA US JUL, P156

Burch J., 2004, SOL 2004 C 29 NAT PA, P394  
 Carlo J, 2008, ENER BUILDINGS, V40, P2002, DOI 10.1016/j.enbuild.2008.05.002  
 Cheng CL, 2002, ENER BUILDINGS, V34, P261, DOI 10.1016/S0378-7788(01)00097-4  
 Cholewa T, 2011, ENER BUILDINGS, V43, P2140, DOI 10.1016/j.enbuild.2011.04.026  
 Cholewa T, 2010, ENER BUILDINGS, V42, P183, DOI 10.1016/j.enbuild.2009.08.013  
 Colmenar-Santos A, 2014, ENER BUILDINGS, V69, P481, DOI 10.1016/j.enbuild.2013.11.036  
 Crawford RH, 2004, SOL ENERGY, V76, P159, DOI 10.1016/j.solener.2003.07.030  
 Darelid J, 2002, J HOSP INFECT, V50, P213, DOI 10.1053/jhin.2002.1185  
 de Almeida A, 2011, ENER BUILDINGS, V43, P1884, DOI 10.1016/j.enbuild.2011.03.027  
 ENERGEX, 2014, HOT WAT REW FAQ  
 Flower D. J. M., 2009, INTEGRATED APPROACH  
 Guan L, 2011, ENER BUILDINGS, V43, P485, DOI 10.1016/j.enbuild.2010.10.013  
 Hendron R., 2004, SIMBUILD2004 C BOULD, P1  
 Hepbasli A, 2009, RENEW SUST ENER REV, V13, P1211, DOI 10.1016/j.rser.2008.08.002  
 Hong J, 2013, P I MECH ENG A-J POW, V227, P30, DOI 10.1177/0957650912454830  
 Kenway S., 2013, 100 URB WAT SEC RES  
 Kenway SJ, 2013, ENER BUILDINGS, V58, P378, DOI 10.1016/j.enbuild.2012.08.035  
 Li XT, 2012, APPL THERM ENG, V48, P317, DOI 10.1016/j.applthermaleng.2011.12.045  
 Liu XY, 2014, ENER BUILDINGS, V69, P1, DOI 10.1016/j.enbuild.2013.09.039  
 Mathys W, 2008, INT J HYG ENVIR HEAL, V211, P179, DOI 10.1016/j.ijheh.2007.02.004  
 Meyers RJ, 2010, ENER BUILDINGS, V42, P563, DOI 10.1016/j.enbuild.2009.10.026  
 Perez-Lombard L, 2008, ENER BUILDINGS, V40, P394, DOI 10.1016/j.enbuild.2007.03.007  
 Pillai IR, 2007, SOL ENERGY, V81, P162, DOI 10.1016/j.solener.2006.04.009  
 QLD, 2012, DEL AFF SAF REL EN W  
 Ramesh T, 2010, ENER BUILDINGS, V42, P1592, DOI 10.1016/j.enbuild.2010.05.007  
 Serrano-Suarez A, 2013, ENVIRON SCI POLLUT R, V20, P5534, DOI 10.1007/s11356-013-1557-5  
 Thiers S, 2012, BUILD ENVIRON, V51, P276, DOI 10.1016/j.buildenv.2011.11.018  
 Williams Ross P, 2011, J EXP SCI ENV EPIDEM, P1  
 Zhang Z., 2013, ADV MAT RES, V664, P1002

NR 41

TC 16

Z9 16

U1 3

U2 25

PU ELSEVIER SCIENCE SA

PI LAUSANNE

PA PO BOX 564, 1001 LAUSANNE, SWITZERLAND

SN 0378-7788

EI 1872-6178

J9 ENER BUILDINGS

J1 Energy Build.

PD OCT

PY 2014

VL 82

BP 222

EP 236

DI 10.1016/j.enbuild.2014.07.007

PG 15

WC Construction & Building Technology; Energy & Fuels; Engineering, Civil

SC Construction & Building Technology; Energy & Fuels; Engineering

GA AR7SZ

UT WOS:000343781400022

DA 2018-05-03

ER

PT J

AU Liu, L

Zhao, J

- Liu, X  
Wang, ZX  
AF Liu, Long  
Zhao, Jing  
Liu, Xin  
Wang, Zhaoxia
- TI Energy consumption comparison analysis of high energy efficiency office buildings in typical climate zones of China and US based on correction model
- SO ENERGY  
LA English  
DT Article  
DE Energy consumption comparison; Correction factors; High energy efficiency; Office buildings; Typical climate zones  
ID RESIDENTIAL ELECTRICITY CONSUMPTION; COOLING LOAD; HONG-KONG; PERFORMANCE; TURKEY; OPTIMIZATION; SYSTEMS; SECTOR; SPACE; STOCK  
AB Actual operation energy consumption of the high energy efficiency buildings built and operated in China and U.S. has been quite different than expected. This paper compares actual energy consumption to expect high energy efficiency office buildings in U.S. and China. Considering the different indoor design temperature, climate conditions and operated period between the compared cases in the two countries impact on the building energy consumption, correction model was built to eliminate the influence of the three factors on the comparison result and put the comparison analysis of high energy efficiency office buildings in the two countries into the same level. Regard to building general information and climate condition, four pairs of buildings in typical climate zones of China and U.S. were selected to compare the building energy conservation technology and building energy consumption based on a large scale of investigation and testing. After corrected, the energy consumption data are analyzed, including total energy consumption, and sub-metering energy consumption such as heating, cooling, lighting, office equipment, etc.. The energy saving technologies applied in these four pairs of buildings was also compared to explain energy consumption differences. (C) 2013 Elsevier Ltd. All rights reserved.
- C1 [Liu, Long; Zhao, Jing; Liu, Xin; Wang, Zhaoxia] Tianjin Univ, Sch Environm Sci & Engn, Tianjin 300072, Peoples R China.  
RP Zhao, J (reprint author), Tianjin Univ, Sch Environm Sci & Engn, 92 Weijin Rd, Tianjin 300072, Peoples R China.  
EM zhaojing@tju.edu.cn  
OI Zhao, Jing/0000-0002-0346-3292  
FU "International Science & Technology Cooperation Program of China"sss [2010DFA72740-06]  
FX Project (2010DFA72740-06) supported by "International Science & Technology Cooperation Program of China"sss.
- CR Agioutantis Z, 2000, GEOTHERMICS, V29, P51, DOI 10.1016/S0375-6505(99)00050-4  
Aktacir MA, 2008, ENER CONVERS MANAGE, V49, P1766, DOI 10.1016/j.enconman.2007.10.021  
[Anonymous], 2011, ASHRAE HDB  
Bawaneh K, 2011, RENEW SUST ENER REV, V3  
Beerepoot M, 2007, ENER POLICY, V35, P4812, DOI 10.1016/j.enpol.2007.04.015  
Bueno B, 2012, BUILD ENVIRON, V54, P116, DOI 10.1016/j.buildenv.2012.01.023  
Bulut H, 2003, ENERGY, V28, P1133, DOI 10.1016/S0360-5442(03)00118-X  
Delfani S, 2010, ENER BUILDINGS, V42, P1952, DOI 10.1016/j.enbuild.2010.06.001  
Djuric N, 2010, ENER BUILDINGS, V42, P510, DOI 10.1016/j.enbuild.2009.10.020  
Durmayaz A, 2000, ENERGY, V25, P1245, DOI 10.1016/S0360-5442(00)00040-2  
Fazlollahi S, 2012, ENERGY, V45, P12, DOI 10.1016/j.energy.2012.02.046  
Ghiaus C, 2003, ENER BUILDINGS, V35, P405, DOI 10.1016/S0378-7788(02)00110-X  
Ghiaus C, 2013, ENERGY, V50, P292, DOI 10.1016/j.energy.2012.10.024  
Kavousian A, 2013, ENERGY, V55, P184, DOI 10.1016/j.energy.2013.03.086  
Kofoworola OF, 2009, ENER BUILDINGS, V41, P1076, DOI 10.1016/j.enbuild.2009.06.002  
Korolija I, 2011, ENER BUILDINGS, V43, P1247, DOI 10.1016/j.enbuild.2011.01.003  
Lam JC, 1999, ENER CONVERS MANAGE, V40, P39, DOI 10.1016/S0196-8904(98)00112-5  
Lam JC, 2008, ENERGY, V33, P513, DOI 10.1016/j.energy.2007.10.002  
Li DHW, 2013, ENERGY, V54, P1, DOI 10.1016/j.energy.2013.01.070

Li DHW, 2012, ENERGY, V42, P103, DOI 10.1016/j.energy.2012.03.044  
Li DHW, 2003, ENER CONVERS MANAGE, V44, P1831, DOI 10.1016/S0196-8904(02)00189-9  
Liu X, 2007, J XIAN AEROTECH COLL, V25, P34  
Santin OG, 2009, ENER BUILDINGS, V41, P1223, DOI 10.1016/j.enbuild.2009.07.002  
Sarak H, 2003, ENERGY, V28, P929, DOI 10.1016/S0360-5442(03)00035-5  
Satman A, 1999, ENERGY, V24, P833, DOI 10.1016/S0360-5442(99)00035-3  
Wan KKW, 2010, ENER BUILDINGS, V42, P1463, DOI 10.1016/j.enbuild.2010.03.016  
Yan YY, 1998, ENERGY, V23, P17  
Yang L, 2008, APPL ENER, V85, P800, DOI 10.1016/j.apenergy.2007.11.002  
Yang L, 2011, ENERGY, V36, P6121, DOI 10.1016/j.energy.2011.07.053  
Zogou O, 1998, ENER CONVERS MANAGE, V39, P609, DOI 10.1016/S0196-8904(97)00050-2

NR 30

TC 16

Z9 16

U1 2

U2 28

PU PERGAMON-ELSEVIER SCIENCE LTD

PI OXFORD

PA THE BOULEVARD, LANGFORD LANE, KIDLINGTON, OXFORD OX5 1GB, ENGLAND

SN 0360-5442

EI 1873-6785

J9 ENERGY

J1 Energy

PD FEB 1

PY 2014

VL 65

BP 221

EP 232

DI 10.1016/j.energy.2013.12.012

PG 12

WC Thermodynamics; Energy & Fuels

SC Thermodynamics; Energy & Fuels

GA AB3CO

UT WOS:000331669100023

DA 2018-05-03

ER

PT J

AU Fernandes, LL

Lee, ES

DiBartolomeo, DL

McNeil, A

AF Fernandes, Luis L.

Lee, Eleanor S.

DiBartolomeo, Dennis L.

McNeil, Andrew

TI Monitored lighting energy savings from dimmable lighting controls in The

New York Times Headquarters Building

SO ENERGY AND BUILDINGS

LA English

DT Article

DE Building energy-efficiency; Daylighting; Lighting control systems

ID CONTROL-SYSTEMS; PERFORMANCE; OFFICES

AB Digital addressable, dimmable lighting controls were introduced to the US market in the early 2000s with the promise of energy savings while allowing greater flexibility than their analog counterpart. The New York Times Company installed this emerging technology, after thorough pre-procurement testing, in their new building in New York, NY. Four years after full occupancy (2007), the owner agreed to participate in post-occupancy monitoring of the lighting system to verify actual performance. Annual lighting energy



savings from daylighting, setpoint tuning and occupancy controls were determined for the daylit, open-plan office areas on three typical floors (6th, 11th, and 20th) of the 51-story tower. Energy savings were calculated from data recorded by the lighting control system, after calibration through independent energy consumption measurements. Savings from dimming controls (daylighting and setpoint tuning) were 12.6 kWh/m(2) yr for the daylit spaces on the three floors overall, or 20%, relative to ASHRAE 90.1-2007. Against the prescriptive code in effect at the time of the building's construction (ASHRAE 90.1-2001), savings were 21.0 kWh/m(2) yr or 28%. Annual lighting energy use with all lighting control strategies was 33.9 kWh/m(2) yr in the daylit, open plan zones on average for the three floors. A simple payback analysis was conducted. (C) 2013 Elsevier B.V. All rights reserved.

- C1 [Fernandes, Luis L.; Lee, Eleanor S.; DiBartolomeo, Dennis L.; McNeil, Andrew] Univ Calif Berkeley, Lawrence Berkeley Natl Lab, Bldg Technol & Urban Syst Dept, Environm Energy Technol Div, Berkeley, CA 94720 USA.
- RP Fernandes, LL (reprint author), Univ Calif Berkeley, Lawrence Berkeley Natl Lab, Bldg Technol & Urban Syst Dept, Environm Energy Technol Div, Mailstop 90-3111,1 Cyclotron Rd, Berkeley, CA 94720 USA.  
EM lfernandes@lbl.gov
- FU U.S. Department of Energy [DE-AC02-05CH11231]; California Energy Commission
- FX This work was supported by the Assistant Secretary for Energy Efficiency and Renewable Energy, Building Technologies Program, of the U.S. Department of Energy, under contract no. DE-AC02-05CH11231 and by the California Energy Commission through its Public Interest Energy Research (PIER) Program on behalf of the citizens of California.
- CR American Society of Heating Refrigerating and Air-Conditioning Engineers (ASHRAE), 2010, 9012010 ASHRAE  
American Society of Heating Refrigerating Air-Conditioning Engineers, 2001, 9012001 ASHRAE  
ASHRAE, 2007, 9012007 ASHRAE  
Birt B., 2009, LUX EUR 11 EUR LIGHT, P731  
Consolidated Edison Company of New York Inc., PSC 10 EL STAT MARK  
Consolidated Edison Company of New York Inc., PSC 10 EL, P63  
Galasiu AD, 2007, LEUKOS, V4, P7, DOI 10.1582/LEUKOS.2007.04.01.001  
Granderson J, 2010, LEUKOS, V7, P85, DOI 10.1582/LEUKOS.2010.07.02002  
Lee E., 2007, DAYLIGHTING NEW YORK  
Lee ES, 2006, ENERGBUILDINGS, V38, P914, DOI 10.1016/j.enbuild.2006.03.019  
Lee ES, 2005, LBNL57602  
Lee ES, 2013, LBNL6023E  
Mistrick RG, 1997, J ILLUM ENG SOC, V26, P150, DOI 10.1080/00994480.1997.10748199  
The PostgreSQL Global Development Group, 2008, POSTGRESQL 8 3 16 DO  
Roisin B, 2008, ENERGBUILDINGS, V40, P514, DOI 10.1016/j.enbuild.2007.04.006  
Rubinstein F., 2010, LBNL4190E  
Rubinstein F., 1989, PHOTOELECTRIC CONTRO  
Schrum L., 1996, DAYL DIMM SYST STUD  
Valdya P., 2004, P 2004 ACEEE SUMM ST  
Williams A, 2012, LEUKOS, V8, P161, DOI 10.1582/LEUKOS.2012.08.03.001
- NR 20  
TC 16  
Z9 16  
U1 2  
U2 8  
PU ELSEVIER SCIENCE SA  
PI LAUSANNE  
PA PO BOX 564, 1001 LAUSANNE, SWITZERLAND  
SN 0378-7788  
EI 1872-6178  
J9 ENERGBUILDINGS  
JI Energy Build.  
PD JAN  
PY 2014  
VL 68

BP 498  
 EP 514  
 DI 10.1016/j.enbuild.2013.10.009  
 PN A  
 PG 17  
 WC Construction & Building Technology; Energy & Fuels; Engineering, Civil  
 SC Construction & Building Technology; Energy & Fuels; Engineering  
 GA 292EP  
 UT WOS:000329885300052  
 DA 2018-05-03  
 ER

PT J  
 AU Chingcuanco, F  
 Miller, EJ  
 AF Chingcuanco, Franco  
 Miller, Eric J.  
 TI A microsimulation model of urban energy use: Modelling residential space  
 heating demand in ILUTE  
 SO COMPUTERS ENVIRONMENT AND URBAN SYSTEMS  
 LA English  
 DT Article  
 DE Urban energy; Agent-based modelling; Integrated urban models;  
 Microsimulation; Residential energy; ILUTE

ID GREATER TORONTO; CONSUMPTION; CANADA; AREA; NETWORK; SECTOR

AB Rapid urbanization, climate change and energy security warrant a more detailed understanding of how cities today consume energy. Agent-based, integrated microsimulation models of urban systems provide an excellent platform to accomplish this task, as they can capture both the short- and long-term decisions of firms and households which directly affect urban energy consumption. This paper presents the current effort towards developing an urban energy model for the Integrated Land Use, Transportation, Environment (ILUTE) modelling system.

As a first step, a model for the residential space heating system evolution of the Greater Toronto-Hamilton Area was developed. A bottom-up approach, where individual uses are aggregated, was then employed to estimate the region's space heating demand. Conventional bottom-up methodologies often suffer from insensitivity to either technological or behavioral factors. It is argued that coupling a discrete choice model with building energy simulation software solves this problem. A joint logit model of heating fuel and equipment choice was developed and estimated using Toronto household microdata. The HOT2000 software was then used to compute individual dwelling unit space heating use. The entire residential energy analysis was performed in tandem with the housing market and demographic evolution processes. This allows the endogenous formation of the required inputs as well as adherence to the core ILUTE framework of integrated modelling.

This residential space heating model is a first step towards a comprehensive urban energy end-use model. Further steps include developing similar models for other residential end-uses, such electricity and hot water consumption, as well as extensions to the commercial and transportation sectors. The entire effort aims to introduce an alternate methodology to modelling urban energy consumption that takes advantage of agent-based microsimulation to enhance and address issues with current approaches. (C) 2011 Elsevier Ltd. All rights reserved.

C1 [Chingcuanco, Franco] Univ Toronto, Div Engr Sci, Toronto, ON M5S 1A4, Canada.

[Miller, Eric J.] Univ Toronto, Dept Civil Engr, Toronto, ON M5S 2G8, Canada.

RP Chingcuanco, F (reprint author), Univ Toronto, Div Engr Sci, 35 St George St, Toronto, ON M5S 1A4, Canada.

EM franco.chingcuanco@utoronto.ca; miller@ecf.utoronto.ca

CR Akbari H, 2004, ENERGY, V29, P191, DOI 10.1016/j.energy.2003.09.004

Almeida A. M., 2009, P 45 ISOCARP INT C P

Aydinalp-Koksal M, 2008, APPL ENERG, V85, P271, DOI 10.1016/j.apenergy.2006.09.012

BERKOWITZ MK, 1990, CAN J ECON, V23, P253, DOI 10.2307/135603

Boydell S., 2010, P 5 URB RES S MARS F

CanmetENERGY, 2011, HOT2000

DUBIN JA, 1984, ECONOMETRICA, V52, P345, DOI 10.2307/1911493  
 Gao WL, 2010, TRANSP RES RECORD, P118, DOI 10.3141/2197-14  
 Hao JY, 2010, TRANSP RES RECORD, P1, DOI 10.3141/2176-01  
 HATZOPOULOU M, 2007, TRANSPORT RES REC, V2011, P29  
 International Energy Agency Office of the Chief Economist, 2008, WORLD EN OUTL 2008 E  
 Keirstead J., 2010, P 5 URB RES S MARS F  
 Marshall, 1999, DODG REP REM COST GU  
 MILLER EJ, 2003, TRANSPORT RES REC, V1831, P114  
 Miller E. J., TRANSPORTAT IN PRESS  
 Mohammadian A., 2003, TRANSPORT RES REC, P98  
 Natural Resources Canada, 2010, RES EN PRIC BACKG IN  
 Natural Resources Canada, 2009, BATCH HOT2000 DRAFT  
 Nesbakken R, 1999, ENERG ECON, V21, P493, DOI 10.1016/S0140-9883(99)00022-5  
 Pritchard D. R., 2009, 88 ANN M TRANSP RES  
 Robinson D, 2009, P 11 INT IBPSA C GLA  
 Roorda MJ, 2010, TRANSPORT RES E-LOG, V46, P18, DOI 10.1016/j.tre.2009.06.002  
 Seiders D., 2007, STUDY LIFE EXPECTANC  
 Sivakumar A., 2009, MODELLING URBAN ENER  
 Statistics Canada, 2011, CAN CENS 1986 2006  
 Statistics Canada, 1993, SURV HOUS EN US 1993  
 Statistics Canada, 2010, SURV HOUS SPEND 1998  
 Swan L, 2008, P INT C BUILD EN ENV  
 Swan LG, 2009, J BUILD PERFORM SIMU, V2, P75, DOI 10.1080/19401490802491827  
 Swan LG, 2009, RENEW SUST ENERG REV, V13, P1819, DOI 10.1016/j.rser.2008.09.033  
 Tirumalachetty S., 2009, 88 ANN M TRANSP RES  
 United Nations Department of Economic and Social Affairs, 2007, WORLD URB PROSP 2007  
 Vaage K, 2000, ENERG ECON, V22, P649, DOI 10.1016/S0140-9883(00)00053-0  
 VandeWeghe JR, 2007, J IND ECOL, V11, P133, DOI 10.1162/jie.2007.1220

NR 34

TC 16

Z9 17

U1 3

U2 22

PU ELSEVIER SCI LTD

PI OXFORD

PA THE BOULEVARD, LANGFORD LANE, KIDLINGTON, OXFORD OX5 1GB, OXON, ENGLAND

SN 0198-9715

J9 COMPUT ENVIRON URBAN

JI Comput. Environ. Urban Syst.

PD MAR

PY 2012

VL 36

IS 2

SI SI

BP 186

EP 194

DI 10.1016/j.compenvurbsys.2011.11.005

PG 9

WC Computer Science, Interdisciplinary Applications; Engineering,  
 Environmental; Environmental Studies; Geography; Operations Research &  
 Management Science

SC Computer Science; Engineering; Environmental Sciences & Ecology;  
 Geography; Operations Research & Management Science

GA 921PC

UT WOS:000302488500009

DA 2018-05-03

ER

PT J

AU Li, BZ

Yao, RM

AF Li, Baizhan

Yao, Runming

TI Building energy efficiency for sustainable development in China: challenges and opportunities

SO BUILDING RESEARCH AND INFORMATION

LA English

DT Article

DE built environment; carbon reduction; energy efficiency; integrated design; low-carbon society; research agenda; sustainable design; urbanization; China

ID SYSTEMS

AB Rapid urbanization in China has resulted in great demands for energy, resources and pressure on the environment. The progress in China's development is considered in the context of energy efficiency in the built environment, including policy, technology and implementation. The key research challenges and opportunities are identified for delivering a low-carbon built environment. The barriers include the existing traditional sequential design process, the lack of integrated approaches and insufficient socio-technical knowledge. A proposed conceptual systemic model of an integrated approach identifies research opportunities. The organization of research activities should be initiated, operated and managed in a collaborative way among policy-makers, professionals, researchers and stakeholders. More emphasis is needed on integrating social, economic and environmental impacts in the short, medium and long terms. An ideal opportunity exists for China to develop its own expertise, not merely in a technical sense but in terms of vision and intellectual leadership in order to flourish in global collaborations.

C1 [Li, Baizhan] Minist Educ, Key Lab Three Gorges Reservoir Reg Ecoenvironm, Chongqing 400044, Peoples R China.

[Li, Baizhan] Chongqing Univ, Fac Urban Construct & Environm Engn, Chongqing 400044, Peoples R China.

[Yao, Runming] Univ Reading, Sch Construct Management & Engn, Reading RG6 6AW, Berks, England.

RP Li, BZ (reprint author), Minist Educ, Key Lab Three Gorges Reservoir Reg Ecoenvironm, 174 Shazhengjie, Chongqing 400044, Peoples R China.

EM baizhanli@cqu.edu.cn; r.yao@reading.ac.uk

OI Li, Baizhan/0000-0001-7526-1748

FU National Natural Science Foundation of China [50838009]; UK FCO Strategic Programme Fund

FX Part of the information presented in this paper is from the project funded by the National Natural Science Foundation of China (50838009) and the UK FCO Strategic Programme Fund.

CR 2012 NPC & CPPCC, 2012, 2012 NPC CPPCC NAT P

Bellenger L. G., 2010, AM SOC HEAT REFR AIR

Chinese Academy of Social Sciences - CASS, 2011, CHIN CIT COMP BLUE B

China Daily, 2007, CHINA DAILY 1016

China National Standard (CNS), 1993, STAND CLIM REG ARCH

China National Standard (CNS), 2006, EV CRIT GREEN BUILD

China National Standard (CNS), 2005, DES STAND EN EFF PUB

China National Standard (CNS), 1996, EN CONS DES STAND NE

China National Standard (CNS), 2005, COD DES CIV BUILD GB

China National Standard (CNS), 1993, COD THERM DES RES BU

China Urban Research Committee (CURC), 2011, GREEN BUILD

China Urban Research Committee (CURC), 2008, GREEN BUILD

China Urban Research Committee (CURC), 2010, GREEN BUILD

Dhakal S, 2009, ENERG POLICY, V37, P4208, DOI 10.1016/j.enpol.2009.05.020

EST, 2008, EN EFF COD SUST HOM

Godfrey P., 2009, P INT C SUST DEV BUI

Hao Y., 2011, XINHUA NEWS 0819

Hong TZ, 2009, ENERG BUILDINGS, V41, P426, DOI 10.1016/j.enbuild.2008.11.003

Hu R., 2007, PROPOSAL CONSTRUCTIO

International Energy Agency (IEA), 2009, WORLD EN OUTL 2010  
 [Anonymous], 2008, CHIN CLIM CHANG WHIT  
 Leaman A, 2010, BUILD RES INF, V38, P564, DOI 10.1080/09613218.2010.495217  
 Li B., 2011, PROJECT REPORT THERM  
 Li B., 2005, INT J HOUSING SCI IT, V29, P234  
 Li BZ, 2009, RENEW ENERG, V34, P1994, DOI 10.1016/j.renene.2009.02.015  
 Li J, 2008, ENERG POLICY, V36, P1736, DOI 10.1016/j.enpol.2008.01.029  
 Liu M., 2009, ENERG BUILDINGS, V42, P1482  
 Liu W, 2011, APPL ENERG, V88, P518, DOI 10.1016/j.apenergy.2010.07.014  
 Ministry of Housing and Urban - Rural Development (MOHURD), 2009, SPEC PROGR PLANN EN  
 Ministry of Housing and Urban- Rural Development (MOHURD), 2008, TECHN GUID BUILD EN, V118  
 Ministry of Housing and Urban - Rural Development (MOHURD), 2008, PROV MAN METH BUILD, V80  
 Ministry of Housing and Urban - Rural Development (MOHURD), 2009, ENL IMPL BUILD EN EF  
 Ministry of Housing and Urban - Rural Development (MOHURD), 2005, REP BUILD SURV LARG  
 NBS (National Bureau of Statistics), 1994, CHIN STAT YB  
 NBS ( National Bureau of Statistics), 2010, CHIN STAT YB  
 National Development of and Reform Commission (NDRC), 2011, ANN CARR OUT PIL PRO  
 National Development of and Reform Commission (NDRC), 2011, MED LONG TERM DEV PL  
 Nicol LA, 2011, BUILD RES INF, V39, P459, DOI 10.1080/09613218.2011.588590  
 Ouyang JL, 2009, ENERG BUILDINGS, V41, P711, DOI 10.1016/j.enbuild.2009.02.003  
 Qiu B.X., 2011, 7 INT C GRE IN PRESS  
 Qiu B.X., 2005, CHINA EC WEEKLY, P11  
 Salat S, 2009, BUILD RES INF, V37, P598, DOI 10.1080/09613210903162126  
 Tsinghua University Building Energy Research Centre (TUBERC), 2008, 2008 ANN REP CHIN BU  
 Tsinghua University Building Energy Research Centre (TUBERC), 2011, 2011 ANN REP CHIN BU  
 Tsinghua University Building Energy Research Centre (TUBERC), 2010, 2010 ANN REP CHIN BU  
 Wen J., 2011, ECOCITY GREEN BU SUM  
 Whyte J., 2011, BUILD RES INF, V39, P459  
 Yang YL, 2010, ENERG POLICY, V38, P7687, DOI 10.1016/j.enpol.2010.08.018  
 Yao RM, 2005, RENEW ENERG, V30, P1973, DOI 10.1016/j.renene.2005.01.013  
 Yin B., 2007, J CONSRUCTION TECHNO, V36, P54

NR 50  
 TC 16  
 Z9 16  
 U1 0  
 U2 19  
 PU TAYLOR & FRANCIS LTD  
 PI ABINGDON  
 PA 4 PARK SQUARE, MILTON PARK, ABINGDON OX14 4RN, OXON, ENGLAND  
 SN 0961-3218  
 EI 1466-4321  
 J9 BUILD RES INF  
 JI Build. Res. Informat.  
 PY 2012  
 VL 40  
 IS 4  
 SI SI  
 BP 417  
 EP 431  
 DI 10.1080/09613218.2012.682419  
 PG 15  
 WC Construction & Building Technology  
 SC Construction & Building Technology  
 GA 971RE  
 UT WOS:000306220700003  
 DA 2018-05-03  
 ER

PT J

AU Martiskainen, M

Coburn, J

AF Martiskainen, Mari

Coburn, J.

TI The role of information and communication technologies (ICTs) in household energy consumption-prospects for the UK

SO ENERGY EFFICIENCY

LA English

DT Article

DE Information and communication technologies; Household energy consumption; Behavioural change

ID CONSERVATION; FEEDBACK; ATTITUDES; BEHAVIOR

AB Growing concerns about climate change and energy security have led to a strong focus on energy demand reduction and energy efficiency within United Kingdom (UK) energy policy. At the same time, information and communication technologies (ICTs) have become pervasive in society and this has brought with it new policy options which use them as enabling technologies. One such policy option planned for implementation in the UK is the use of smart meters and real-time displays to encourage people to become more aware of their energy consumption and possibly change their energy-related behaviours. Smart meters and display units by definition link individuals, technologies and society, and their effectiveness is influenced by a range of factors. Ten semi-structured stakeholder interviews with industry, government and academia and a review of literature were conducted in order to identify which factors are most likely to contribute to the effectiveness of implementing smart meters and real-time displays in the UK. Further analysis showed a number of key themes and perspectives on behavioural change, particularly as they relate to household electricity use and the role of smart meters in the UK energy policy, including the role of ICTs in energy demand reduction more generally.

C1 [Martiskainen, Mari; Coburn, J.] Univ Sussex, Sussex Energy Grp, SPRU Sci & Technol Policy Res, Freeman Ctr, Brighton BN1 9QE, E Sussex, England.

RP Martiskainen, M (reprint author), Univ Sussex, Sussex Energy Grp, SPRU Sci & Technol Policy Res, Freeman Ctr, Brighton BN1 9QE, E Sussex, England.

EM m.martiskainen@sussex.ac.uk

OI Martiskainen, Mari/0000-0002-3503-9197

FU EdF Energy and the Economic and Social Research Council

FX The authors would like to thank Dr. Jim Watson for his valuable comments. The authors also acknowledge the funding support from EdF Energy and the Economic and Social Research Council for two research projects which were used as the basis for this article.

CR Abrahamse W, 2005, J ENVIRON PSYCHOL, V25, P273, DOI 10.1016/j.jenvp.2005.08.002

Bamberg S, 2003, ENVIRON BEHAV, V35, P264, DOI 10.1177/0013916502250134

BECKER LJ, 1978, J APPL PSYCHOL, V63, P428, DOI 10.1037/0021-9010.63.4.428

BECKER LJ, 1981, ENVIRON BEHAV, V13, P590, DOI 10.1177/0013916581135004

\*BERR, 2008, EN CONS TABL DOM EN

Bertoldi P., 2007, ELECT CONSUMPTION EF

BITTLE RG, 1979, BEHAV MODIF, V3, P187, DOI 10.1177/014544557932004

BITTLE RG, 1979, J ENVIRON SYST, V9, P275, DOI 10.2190/91AA-P97G-JF92-T7EJ

Boardman B., 2005, 40 HOUSE

Darby S, 2006, EFFECTIVENESS FEEDBA

Department for Communities and Local Government (DCLG), 2008, DEF ZER CARB HOM NON

\*DEFRA, 2007, UK EN EFF ACT PLAN

Department of Trade and Industry (DTI), 2007, M EN CHALL WHIT PAP

Ek K, 2010, ENER POLICY, V38, P1578, DOI 10.1016/j.enpol.2009.11.041

\*EN RET ASS, 2007, SMART MET

Erdmann L, 2004, FUTURE IMPACT ICTS E

\*EST, 2006, HAB LIF EUR EN US RE

Fischer C., 2007, P ECEEE 2007 SUMM ST, P1873

Foresight Sustainable Energy Management and the Built Environment Project, 2008, FIN PROJ REP

GARLING, 2002, TRANSPORT POLICY, V9, P59

Helm Dieter, 2004, ENERGY STATE MARKET

HM Government, 2006, CLIM CHANG SUST EN A  
 HM Government, 2009, UK LOW CARB TRANS PL  
 International Energy Agency, 2009, WORLD EN OUTL  
 Jackson T., 2005, MOTIVATING SUSTAINAB  
 KNOWLES H, 2005, MAKING NETWORK REGIO  
 Koomey Jonathan G., 2007, ESTIMATING TOTAL POW  
 LAITNER JA, 2000, INFORM COMMUNICATION  
 LEES E, 2007, SMART METERS COSTS C  
 Marechal K, 2010, ECOL ECON, V69, P1104, DOI 10.1016/j.ecolecon.2009.12.004  
 Martiskainen M., 2007, AFFECTING CONSUMER B  
 Martiskainen M, 2009, ENER CLIM ENVIRON, P165  
 May T., 2001, SOCIAL RES ISSUES ME  
 \*OFG, 2009, EN DEM RES PROJ REV  
 \*OPSI, 2008, CLIM CHANG ACT 2008  
 OWEN G, 2007, SMART METERS GREAT B  
 Owen Gill, 2006, SMART METERS COMMERC  
 Owen P., 2007, AMPERE STRIKES BACK  
 Owens S, 2008, ENER POLICY, V36, P4412, DOI 10.1016/j.enpol.2008.09.031  
 Pamlin D., 2006, SAVING CLIMATE SPEED  
 Patterson W., 1999, TRANSFORMING ELECT C  
 Rip A, 1998, HUMAN CHOICE CLIMATE, P327  
 Roberts S, 2003, EFFECTIVE ENERGY INF  
 Roberts S, 2008, ENER POLICY, V36, P4482, DOI 10.1016/j.enpol.2008.09.023  
 Steg L, 2008, ENER POLICY, V36, P4449, DOI 10.1016/j.enpol.2008.09.027  
 Stern PC, 2000, J SOC ISSUES, V56, P407, DOI 10.1111/0022-4537.00175  
 Wilsdon J., 2001, DIGITAL FUTURES AGEN  
 Yin R. K., 2003, CASE STUDY RES DESIG  
 YOUNG S, 2006, CLIMATE CHANGE ICT O

NR 49

TC 16

Z9 16

U1 2

U2 21

PU SPRINGER

PI DORDRECHT

PA VAN GODEWIJCKSTRAAT 30, 3311 GZ DORDRECHT, NETHERLANDS

SN 1570-646X

J9 ENER EFFIC

JI Energy Effic.

PD MAY

PY 2011

VL 4

IS 2

BP 209

EP 221

DI 10.1007/s12053-010-9094-2

PG 13

WC GREEN & SUSTAINABLE SCIENCE & TECHNOLOGY; Energy & Fuels; Environmental  
 StudiesSC Science & Technology - Other Topics; Energy & Fuels; Environmental  
 Sciences & Ecology

GA 796RA

UT WOS:000293068200006

DA 2018-05-03

ER

PT J

AU Biswas, MAR

Robinson, MD

Fumo, N

AF Biswas, M. A. Rafe

Robinson, Melvin D.

Fumo, Nelson

TI Prediction of residential building energy consumption: A neural network approach

SO ENERGY

LA English

DT Article

DE Residential buildings; Energy consumption modeling; Neural network

ID SECTOR; MODELS; DEMAND; SYSTEM; SPACE; ANN

AB Some of the challenges to predict energy utilization has gained recognition in the residential sector due to the significant energy consumption in recent decades. However, the modeling of residential building energy consumption is still underdeveloped for optimal and robust solutions while this research area has become of greater relevance with significant advances in computation and simulation. Such advances include the advent of artificial intelligence research in statistical model development. Artificial neural network has emerged as a key method to address the issue of nonlinearity of building energy data and the robust calculation of large and dynamic data. The development and validation of such models on one of the TxAIRE Research houses has been demonstrated in this paper. The TxAIRE houses have been designed to serve as realistic test facilities for demonstrating new technologies. The input variables used from the house data include number of days, outdoor temperature and solar radiation while the output variables are house and heat pump energy consumption. The models based on Levenberg-Marquardt and OWO-Newton algorithms had promising results of coefficients of determination within 0.87-0.91, which is comparable to prior literature. Further work will be explored to develop a robust model for residential building application. (C) 2016 Elsevier Ltd. All rights reserved.

C1 [Biswas, M. A. Rafe; Fumo, Nelson] Univ Texas Tyler, Dept Mech Engr, Tyler, TX 75799 USA.

[Robinson, Melvin D.] Univ Texas Tyler, Dept Elect Engr, Tyler, TX 75799 USA.

RP Biswas, MAR (reprint author), Univ Texas Tyler, Dept Mech Engr, Tyler, TX 75799 USA.

EM mbiswas@uttyler.edu

FU TxAIRE

FX The authors would like to thank TxAIRE for providing the data and support. The authors would also like to thank the undergraduate research students including Daniel Lackey and John Henken for their contribution.

CR Ahmad AS, 2014, RENEW SUST ENERG REV, V33, P102, DOI 10.1016/j.rser.2014.01.069

American Society of Heating Refrigerating and Air-Conditioning Engineers Inc, 2013, ASHRAE HDB FUND

Aydinalp M, 2004, APPL ENERG, V79, P159, DOI 10.1016/j.apenergy.2003.12.006

Aydinalp M, 2003, INT J ENERG RES, V27, P441, DOI 10.1002/er.887

Aydinalp M, 2002, APPL ENERG, V71, P87, DOI 10.1016/S0306-2619(01)00049-6

Aydinalp-Koksal M, 2008, APPL ENERG, V85, P271, DOI 10.1016/j.apenergy.2006.09.012

Biswas MAR, 2015, ASME 2015 INT MECH E

CHEN S, 1989, INT J CONTROL, V50, P1873, DOI 10.1080/00207178908953472

Fumo N, 2015, ASME 2015 INT MECH E

Fumo N, 2014, RENEW SUST ENERG REV, V31, P53, DOI 10.1016/j.rser.2013.11.040

Hagan M. T., 1996, NEURAL NETWORK DESIG

Harish VSKV, 2016, RENEW SUST ENERG REV, V56, P1272, DOI 10.1016/j.rser.2015.12.040

Henken J, 2015, 2015 ASEE GSW ANN C

Huang GB, 2006, NEUROCOMPUTING, V70, P489, DOI 10.1016/j.neucom.2005.12.126

Jr JED, 1996, NUMERICAL METHODS UN

Kialashaki A, 2013, APPL ENERG, V108, P271, DOI 10.1016/j.apenergy.2013.03.034

Kumar R, 2013, ENERG BUILDINGS, V65, P352, DOI 10.1016/j.enbuild.2013.06.007

Li C. B., 2007, NEW GREY FORECASTING, V14, P713

Lu XS, 2002, ENERG BUILDINGS, V34, P1033, DOI 10.1016/S0378-7788(02)00021-X

Manry M. T., 1992, 26 AS C SIGN SYST CO

Moon JW, 2013, ENERGIES, V6, P3548, DOI 10.3390/en6073548

Moon JW, 2012, J ASIAN ARCHIT BUILD, V11, P169, DOI 10.3130/jaabe.11.169

Moon JW, 2011, APPL THERM ENG, V31, P2422, DOI 10.1016/j.applthermaleng.2011.04.006



Moon JW, 2010, BUILD ENVIRON, V45, P1612, DOI 10.1016/j.buildenv.2010.01.009  
Moon JM, 2009, THESIS  
Mullen DT, 2015, ENERG BUILDINGS, V99, P313, DOI 10.1016/j.enbuild.2015.04.015  
Perez-Lombard L, 2008, ENERG BUILDINGS, V40, P394, DOI 10.1016/j.enbuild.2007.03.007  
Robinson MD, 2013, 26 INT FLAIRS C ST P  
Seborg D. E., 2011, PROCESS DYNAMICS CON  
Swan L. G., 2009, RENEW SUST ENERG REV, P1819  
[Anonymous], TXAIRE RES DEM HOUS  
[Anonymous], 2013, INT EN OUTL  
Weisstein E. W., LEVENBERG MARQUARDT  
Wille J., 1997, INT C NEUR NETW HOUS  
Zhao HX, 2012, RENEW SUST ENERG REV, V16, P3586, DOI 10.1016/j.rser.2012.02.049  
NR 35  
TC 15  
Z9 15  
U1 4  
U2 17  
PU PERGAMON-ELSEVIER SCIENCE LTD  
PI OXFORD  
PA THE BOULEVARD, LANGFORD LANE, KIDLINGTON, OXFORD OX5 1GB, ENGLAND  
SN 0360-5442  
EI 1873-6785  
J9 ENERGY  
JI Energy  
PD DEC 15  
PY 2016  
VL 117  
BP 84  
EP 92  
DI 10.1016/j.energy.2016.10.066  
PN 1  
PG 9  
WC Thermodynamics; Energy & Fuels  
SC Thermodynamics; Energy & Fuels  
GA EGOJP  
UT WOS:000390719000008  
DA 2018-05-03  
ER  
  
PT J  
AU Tan, B  
    Yavuz, Y  
    Otay, EN  
    Camlibel, E  
AF Tan, Baris  
    Yavuz, Yahya  
    Otay, Emre N.  
    Camlibel, Emre  
TI Optimal selection of energy efficiency measures for energy  
    sustainability of existing buildings  
SO COMPUTERS & OPERATIONS RESEARCH  
LA English  
DT Article  
DE Energy efficiency measures; Multi-period technology selection problem;  
    Knapsack problem; Energy efficiency of buildings; Sustainable  
    retrofitting  
ID PROJECT SELECTION; ESCO INDUSTRY; PORTFOLIO; RETROFIT; MODEL

AB This study is motivated by the need to increase energy efficiency in existing buildings. Around 33% of the energy used in the world is consumed in the buildings. Identifying and investing in the right energy saving technologies within a given budget helps the adoption of energy efficiency measures in existing buildings. We use a mathematical programming approach to select the right energy efficiency measures among all the available ones to optimize financial or environmental benefits subject to budgetary and other logical constraints in single- and multi-period settings. We also present a business model to offer energy efficiency measures as a service. By using a real case study of a university campus, all the relevant energy efficiency measures are identified and their effects are determined by using engineering measurements and modelling. Through numerical experiments using the case data, we investigate and quantify the effects of using environmental or financial savings as the main objective, the magnitude of benefit of using a multi-period planning approach instead of a single-period approach, and also feasibility of offering energy saving technologies as a service. We show that substantial environmental and financial savings can be obtained by using the proposed method to select and invest in technologies in a multi-period setting. We also show that offering energy efficient technologies as a service can be a win-win-win arrangement for a service provider, its client, and also for the environment. (c) 2015 Elsevier Ltd. All rights reserved.

C1 [Tan, Baris] Koc Univ, Coll Adm Sci & Econ, TR-34450 Istanbul, Turkey.

[Yavuz, Yahya] Koc Univ, Dept Ind Engr, TR-34450 Istanbul, Turkey.

[Otay, Emre N.; Camlibel, Emre] Bogazici Univ, Dept Civil Engr, TR-34342 Istanbul, Turkey.

RP Tan, B (reprint author), Koc Univ, Coll Adm Sci & Econ, Rumeli Feneri Yolu, TR-34450 Istanbul, Turkey.

EM btan@ku.edu.tr; yayavuz@ku.edu.tr; notay@boun.edu.tr;

ecamlibel@soyakholding.com.tr

OI Tan, Baris/0000-0002-2584-1020

CR Aflaki S, 2013, PROD OPER MANAG, V22, P503, DOI 10.1111/j.1937-5956.2012.01377.x

Alanne K, 2004, AUTOMAT CONSTR, V13, P377, DOI 10.1016/j.sutcon.2003.12.004

Ardente F, 2011, RENEW SUST ENERG REV, V15, P460, DOI 10.1016/j.rser.2010.09.022

Beaujon GJ, 2001, NAV RES LOG, V48, P18, DOI 10.1002/1520-6750(200102)48:1<18::AID-NAV2>3.0.CO;2-7

Bell M, 2000, ENER BUILDINGS, V32, P267, DOI 10.1016/S0378-7788(00)00053-0

Camlibel M. E., 2011, THESIS

Canadell JG, 2007, P NATL ACAD SCI USA, V104, P18866, DOI 10.1073/pnas.0702737104

Dickinson MW, 2001, IEEE T ENG MANAGE, V48, P518, DOI 10.1109/17.969428

Goldman CA, 2005, ENER POLICY, V33, P387, DOI 10.1016/j.enpol.2003.08.008

Verbeek G, 2005, ENERGY BUILD, V37, P747

Holness G.V.R., 2008, ASHRAE J, V50, P12

Houri A, 2010, ENER BUILDINGS, V42, P658, DOI 10.1016/j.enbuild.2009.11.003

International Energy Agency, 2013, TRANS SUST BUILD STR, DOI [10.1787/9789264202955-en, DOI 10.1787/9789264202955-EN]

Kolokotsa D, 2009, ADV BUILD ENERGY RES, V3, P121, DOI 10.3763/aber.2009.0305

Kyparisis GJ, 1996, EUR J OPER RES, V94, P87, DOI 10.1016/0377-2217(95)00156-5

Liberatore MJ, 1988, PROJECT MANAGEMENT J, V19, P14

LOULOU R, 1979, OPER RES, V27, P1101, DOI 10.1287/opre.27.6.1101

Mahlia TMI, 2011, RENEW SUST ENERG REV, V15, P1125, DOI 10.1016/j.rser.2010.10.014

Muthulingam S, 2013, M&SOM-MANUF SERV OP, V15, P596, DOI 10.1287/msom.2013.0439

Parker P, 2000, ENVIRONMENTS, V28, P29

Rezessy S., 2010, TECHNICAL REPORT

Rysanek AM, 2013, ENER BUILDINGS, V57, P324, DOI 10.1016/j.enbuild.2012.10.027

Sadineni SB, 2011, RENEW ENER, V36, P2925, DOI 10.1016/j.renene.2011.04.006

SCHMIDT RL, 1993, IEEE T ENG MANAGE, V40, P403, DOI 10.1109/17.257733

Urge-Vorsatz D, 2007, BUILD RES INF, V35, P379, DOI 10.1080/09613210701325883

U.S. Congress Office of Technology Assessment, 1992, OTAE518 US C OFF TEC

Vine E, 2005, ENER POLICY, V33, P691, DOI 10.1016/j.enpol.2003.09.014

Yavuz Y., 2013, THESIS

NR 28

TC 15

Z9 15

U1 2

U2 45

PU PERGAMON-ELSEVIER SCIENCE LTD

PI OXFORD

PA THE BOULEVARD, LANGFORD LANE, KIDLINGTON, OXFORD OX5 1GB, ENGLAND  
SN 0305-0548  
EI 1873-765X  
J9 COMPUT OPER RES  
JI Comput. Oper. Res.  
PD FEB  
PY 2016  
VL 66  
BP 258  
EP 271  
DI 10.1016/j.cor.2015.01.013  
PG 14  
WC Computer Science, Interdisciplinary Applications; Engineering,  
Industrial; Operations Research & Management Science  
SC Computer Science; Engineering; Operations Research & Management Science  
GA CZ0FG  
UT WOS:000366779900025  
DA 2018-05-03  
ER

PT J

AU Lee, SH  
Hong, TZ  
Piette, MA  
Sawaya, G  
Chen, YX  
Taylor-Lange, SC

AF Lee, Sang Hoon  
Hong, Tianzhen  
Piette, Mary Ann  
Sawaya, Geof  
Chen, Yixing  
Taylor-Lange, Sarah C.

TI Accelerating the energy retrofit of commercial buildings using a  
database of energy efficiency performance

SO ENERGY

LA English

DT Article

DE High performance computing; EnergyPlus; Building simulation; Energy  
conservation measure; Energy modeling; Retrofit

AB Small and medium-sized commercial buildings can be retrofitted to significantly reduce their energy use, however it is a huge challenge as owners usually lack of the expertise and resources to conduct detailed on-site energy audit to identify and evaluate cost-effective energy technologies. This study presents a DEEP (database of energy efficiency performance) that provides a direct resource for quick retrofit analysis of commercial buildings. DEEP, compiled from the results of about ten million EnergyPlus simulations, enables an easy screening of ECMs (energy conservation measures) and retrofit analysis. The simulations utilize prototype models representative of small and mid-size offices and retails in California climates. In the formulation of DEEP, large scale EnergyPlus simulations were conducted on high performance computing clusters to evaluate hundreds of individual and packaged ECMs covering envelope, lighting, heating, ventilation, air-conditioning, plug-loads, and service hot water. The architecture and simulation environment to create DEEP is flexible and can expand to cover additional building types, additional climates, and new ECMs. In this study DEEP is integrated into a web-based retrofit toolkit, the Commercial Building Energy Saver, which provides a platform for energy retrofit decision making by querying DEEP and unearthing recommended ECMs, their estimated energy savings and financial payback. (C) 2015 Elsevier Ltd. All rights reserved.

C1 [Lee, Sang Hoon; Hong, Tianzhen; Piette, Mary Ann; Chen, Yixing; Taylor-Lange, Sarah C.] Univ Calif Berkeley, Lawrence Berkeley Natl Lab, Bldg Technol & Urban Syst Div, Berkeley, CA 94720 USA.  
[Sawaya, Geof] Univ Utah, Sch Comp, Salt Lake City, UT 84112 USA.

RP Hong, TZ (reprint author), Univ Calif Berkeley, Lawrence Berkeley Natl Lab, Bldg Technol & Urban Syst Div, One Cyclotron Rd, Berkeley, CA 94720 USA.

EM sanghlee@lbl.gov; thong@lbl.gov; mapiette@lbl.gov; sawaya@cs.utah.edu;  
yixingchen@lbl.gov; sctaylorlange@lbl.gov

OI Chen, Yixing/0000-0002-2077-0614; Hong, Tianzhen/0000-0003-1886-9137

FU California Energy Commission under the Public Interest Energy Research (PIER) program [PIR-12-031]; United States Department of Energy [DE-AC02-05CH11231]

FX The establishment of DEEP was part of the Small and Medium Building Efficiency Toolkit and Community Demonstration Program funded by California Energy Commission under the Public Interest Energy Research (PIER) program (PIR-12-031). This work was also supported by the United States Department of Energy (Contract No. DE-AC02-05CH11231). The authors would like to thank the National Energy Research Scientific Computing center (NERSC) at Lawrence Berkeley National Laboratory for providing computing resource and technical support to run the EnergyPlus simulations.

CR ASHRAE, 2011, ADV EN DES GUID SMAL

CEC, 2014, BUILD EN EFF PROGR

CEC, 2014, CAL BUILD CLIM ZON M

CEC, 2003, SMALL HVAC SYST DES

CEC, 2014, DEER DAT EN EFF RES

DOE, 2014, 179D DOE

DOE, 2015, COMM REF BUILD

EIA, 2013, ANN EN OUTL 2013 PRO

[Anonymous], 2013, EN IMP ILL

Fluhrer C, 2010, ASHRAE TRAN, V116, P236

Hale E, 2014, CLOUD BAS MOD CAL US

Hong TZ, 2014, APPL ENER, V126, P90, DOI 10.1016/j.apenergy.2014.03.052

IRS, 2005, COMM PROP OWN LEAS Q

Janda KB, 2013, BUILD RES INF, V41, P39, DOI 10.1080/09613218.2013.743396

Kim H, 2010, CLOUD COMPUTING PRIN

LBNL, 2014, SOFTW FUNCT SPEC REQ

LBNL, 2015, ENERGYIQ ACT OR EN B

LBNL, 2014, EFF MEAS SMART MET D

Lawrence Berkeley National Laboratory (LBNL), 2014, HOM EN SAV

Li Z, 2004, NO TITLE, P229

Ma ZJ, 2012, ENER BUILDINGS, V55, P889, DOI 10.1016/j.enbuild.2012.08.018

Naboni E, 2013, IBPSA IT C BOLZ IT

NREL, 2014, PAR AN TOOL

Pan Y., 2012, EVALUATING COMMERCIA

Petri I, 2013, ENTERPRISE INFORM SY

PNNL PECL, 2011, ADV EN RETR GUID PRA

Preservation Green Lab, 2013, REAL EN EFF POT SMAL

Roth A, 2012, DENCITY OPEN MULTIPU, P251

Sanyal J, 2014, CONCURR COMP-PRACT E, V26, P2122, DOI 10.1002/cpe.3267

Thain D, 2005, CONCURR COMP-PRACT E, V17, P323, DOI 10.1002/cpe.938

Tian W, 2011, J BUILD PERFORM SIMU, V4, P105, DOI 10.1080/19401493.2010.502246

VENUS-C, 2015, VENUS C USER COMMUNI

Zhang Y, 2009, BUILD SIMUL, P1382

NR 33

TC 15

Z9 15

U1 3

U2 19

PU PERGAMON-ELSEVIER SCIENCE LTD

PI OXFORD

PA THE BOULEVARD, LANGFORD LANE, KIDLINGTON, OXFORD OX5 1GB, ENGLAND

SN 0360-5442  
EI 1873-6785  
J9 ENERGY  
JI Energy  
PD OCT  
PY 2015  
VL 90  
BP 738  
EP 747  
DI 10.1016/j.energy.2015.07.107  
PN 1  
PG 10  
WC Thermodynamics; Energy & Fuels  
SC Thermodynamics; Energy & Fuels  
GA CV4PD  
UT WOS:000364248100067  
OA green\_published  
DA 2018-05-03  
ER  
FN Clarivate Analytics Web of Science  
VR 1.0  
PT J  
AU Battista, G  
    Carnielo, E  
    Evangelisti, L  
    Frascarolo, M  
    Vollaro, RD  
AF Battista, Gabriele  
    Carnielo, Emiliano  
    Evangelisti, Luca  
    Frascarolo, Marco  
    Vollaro, Roberto de Lieto  
TI Energy Performance and Thermal Comfort of a High Efficiency House: RhOME  
    for denCity, Winner of Solar Decathlon Europe 2014  
SO SUSTAINABILITY  
LA English  
DT Article  
DE solar decathlon; near zero energy buildings; energy efficiency  
ID URBAN CANYON; BUILDINGS; RELIABILITY; OPTIMIZATION; SYSTEMS  
AB The increase of people living in large cities and the expansion of new urban areas are keys to defining new sustainable models. It is estimated that about 70% of the EU population lives in urban areas, and it is expected to reach 80% by 2030. Consequently, it is important to find a new concept of buildings that can reduce the total energy consumption. The Solar Decathlon is an international university competition, born in 2002, created by the U.S. State Energy Department (DOE). Students are challenged to design and operate a full-scale, innovative and sustainable house able to exploit solar radiation as its sole energy source. The objective of the competition is to promote research and education in sustainable architecture and solar energy fields. This paper presents an overview on the contribution of LIFT (Interdisciplinary Laboratory of Technical Physics of Roma Tre University) to the winning project of the Solar Decathlon Europe 2014 competition: The RhOME for denCity. This project consists of a building properly designed to produce a solar-powered house that is cost-effective, energy-efficient, and attractive.  
C1 [Battista, Gabriele; Carnielo, Emiliano; Evangelisti, Luca; Vollaro, Roberto de Lieto] Univ Roma TRE, Dept Engr, I-00146 Rome, Italy.  
    [Frascarolo, Marco] Univ Roma TRE, Dept Architecture, I-00184 Rome, Italy.  
RP Battista, G (reprint author), Univ Roma TRE, Dept Engr, Via Vasca Navale 79-81, I-00146 Rome, Italy.  
EM gabriele.battista@uniroma3.it; emiliano.carnielo@uniroma3.it;  
    luca.evangelisti@uniroma3.it; marco.frascarolo@uniroma3.it;  
    roberto.delietovollaro@uniroma3.it  
OI Battista, Gabriele/0000-0001-9321-3061; Evangelisti,

Luca/0000-0002-9502-4309; de lieto vollaro, roberto/0000-0002-1010-2313  
CR Battista G, 2014, SUSTAINABILITY-BASEL, V6, P4694, DOI 10.3390/su6084694  
Bottillo S, 2014, SOL ENERGY, V102, P212, DOI 10.1016/j.solener.2014.01.029  
Bottillo S, 2014, SOL ENERGY, V99, P1, DOI 10.1016/j.solener.2013.10.031  
Carnielo E, 2013, BUILD ENVIRON, V60, P56, DOI 10.1016/j.buildenv.2012.11.004  
Coppi M, 2013, INT J VENT, V12, P41  
De Lieto V. R., 2014, ENERG PROCEDIA, V48, P1459, DOI DOI 10.1016/J.EGYPRO.2014.02.165  
De Lieto V. R., 2014, ENERG PROCEDIA, V45, P372, DOI DOI 10.1016/J.EGYPRO.2014.01.040  
Evangelisti L, 2014, SUSTAINABILITY-BASEL, V6, P5311, DOI 10.3390/su6085311  
Evangelisti L, 2014, SUSTAINABILITY-BASEL, V6, P4514, DOI 10.3390/su6074514  
Hayter S., 2004, SOLAR DECATHLON 2002  
Kamal WA, 1997, ENERG CONVERS MANAGE, V38, P39, DOI 10.1016/0196-8904(96)00012-X  
King R. J., 2003, P 3 WORLD C PHOT EN, V3, P2139  
Kjarstad J, 2009, ENERG POLICY, V37, P441, DOI 10.1016/j.enpol.2008.09.056  
Lior N, 2008, ENERGY, V33, P842, DOI 10.1016/j.energy.2007.09.009  
Pagliaroli T, 2015, J SOUND VIB, V341, P116, DOI 10.1016/j.jsv.2014.12.008  
Peng C., 2004, RENEW ENERG, V81, P136  
Peruzzi L, 2014, ENERG BUILDINGS, V68, P19, DOI 10.1016/j.enbuild.2013.09.027  
Salata F, 2015, ENERG BUILDINGS, V99, P32, DOI 10.1016/j.enbuild.2015.04.010  
Salata F, 2015, ENERG BUILDINGS, V86, P118, DOI 10.1016/j.enbuild.2014.09.056  
Salata F, 2014, ENRGY PROCED, V45, P482, DOI 10.1016/j.egypro.2014.01.052  
Salata F, 2014, ENRGY PROCED, V45, P1195, DOI 10.1016/j.egypro.2014.01.125  
Urge-Vorsatz D., 2012, GLOBAL ENERGY ASSESS, P649  
Vollaro AD, 2014, SUSTAINABILITY-BASEL, V6, P7894, DOI 10.3390/su6117894  
De Lieto Vollaro R., 2013, ADV MAT RES, V650, P647  
Vollaro RD, 2015, ENERG BUILDINGS, V87, P87, DOI 10.1016/j.enbuild.2014.10.080  
Vollaro RD, 2014, ENRGY PROCED, V45, P731, DOI 10.1016/j.egypro.2014.01.078  
Voss K, 2011, J GREEN BUILD, V6, P46, DOI 10.3992/jgb.6.1.46  
Wang N, 2009, RENEW ENERG, V34, P2860, DOI 10.1016/j.renene.2009.05.003  
Warner C. L., 2002, P 29 IEEE PHOT SPEC, P44  
Warner C. L., 2006, P 4 WORLD C PHOT EN, V34, P2272  
Zinzi M, 2012, ENERG BUILDINGS, V50, P111, DOI 10.1016/j.enbuild.2012.03.031  
Zinzi M, 2014, ADV BUILD ENERGY RES, V8, P84, DOI 10.1080/17512549.2014.890539

NR 32

TC 15

Z9 15

U1 1

U2 15

PU MDPI AG

PI BASEL

PA ST ALBAN-ANLAGE 66, CH-4052 BASEL, SWITZERLAND

SN 2071-1050

J9 SUSTAINABILITY-BASEL

JI Sustainability

PD JUL

PY 2015

VL 7

IS 7

BP 9681

EP 9695

DI 10.3390/su7079681

PG 15

WC GREEN & SUSTAINABLE SCIENCE & TECHNOLOGY; Environmental Sciences;

Environmental Studies

SC Science & Technology - Other Topics; Environmental Sciences & Ecology

GA CQ1JU

UT WOS:000360354500079

OA gold

DA 2018-05-03  
ER

PT J

AU Salvalai, G  
Masera, G  
Sesana, MM

AF Salvalai, Graziano  
Masera, Gabriele  
Sesana, Marta Maria

TI Italian local codes for energy efficiency of buildings: Theoretical  
definition and experimental application to a residential case study  
SO RENEWABLE & SUSTAINABLE ENERGY REVIEWS

LA English

DT Review

DE Local building energy regulation code; Energy efficiency; Building  
practices; Geocluster distribution; nZEB

ID CO2 EMISSIONS; PERFORMANCE; SECTOR; POLICIES; GREECE

AB The environmental concern in light of anthropogenic climate change is directly concerning the building sector as one of the major energy consumers and CO2 producers. To reduce the environmental impact of new and refurbished buildings, one of the most promising policies is the widespread adoption of Building Energy Regulation Codes (BERC), since they have a direct impact on the everyday work of local planners, architects, engineers and building companies. This article will look at how BERCs were implemented in Italy, where Regions and municipalities have developed in recent years a number of local regulations trying to drive the market towards more energy efficient practices. This happened in a legislative vacuum because the Italian Government implemented the European Directive on the Energy Performance of Buildings (2002/91/EC) only in 2005 and defined the related National Guidelines only in 2009. This article provides an overview on EPBD implementation in Europe and a Geocluster Italian distribution of BERCs in order to show their geographical distribution and their influence on the construction sector practices, focusing in particular on the region of Lombardy. Then the article describes the methodology followed for the definition of BERCs in nine municipalities in the same region. In conclusion, the paper presents the practical application of one of the nine BERCs to a nZEB residential case study as an example of what the EPBD recast define as nZEB. (C) 2014 Elsevier Ltd. All rights reserved.

C1 [Salvalai, Graziano; Masera, Gabriele; Sesana, Marta Maria] Politecn Milan, Dept Architecture Built Environm & Construct Engn, I-20133 Milan, Italy.

RP Salvalai, G (reprint author), Politecn Milan, Dept Architecture Built Environm & Construct Engn, Via Ponzio 31, I-20133 Milan, Italy.

EM graziano.salvalai@polimi.it

RI Masera, Gabriele/K-7795-2015

OI Masera, Gabriele/0000-0002-0704-4052; Sesana, Marta  
Maria/0000-0002-5177-1863

CR Andaloro APF, 2010, ENER POLICY, V38, P5840, DOI 10.1016/j.enpol.2010.05.039

Araujo C, 2013, ENERGY BUILD, V58

Asdrubali F, 2008, ENER BUILDINGS, V40, P1805, DOI 10.1016/j.enbuild.2008.03.007

Beerepoot M, 2007, ENER POLICY, V35, P4812, DOI 10.1016/j.enpol.2007.04.015

Bizzarri G, 2011, ENER BUILDINGS, V43, P2394, DOI 10.1016/j.enbuild.2011.05.027

Brunsgaard C, 2014, BUILD ENVIRON, V72, P1, DOI 10.1016/j.buildenv.2013.10.011

Bull R, 2012, ENER BUILDINGS, V50, P103, DOI 10.1016/j.enbuild.2012.03.032

Casals XG, 2006, ENER BUILDINGS, V38, P381, DOI 10.1016/j.enbuild.2005.05.004

CEN, 2008, 153162008 CEN EUR CO

CEN, 2008, 137902008 CEN ISO EU

CRESME, 2009, CTR RES EC SOC MARK

Dall'O' G, 2012, ENER BUILDINGS, V48, P211, DOI 10.1016/j.enbuild.2012.01.034

Dall'O' Giuliano, 2003, EVALUATION BUILDING

Dascalaki EG, 2012, ENER POLICY, V45, P469, DOI 10.1016/j.enpol.2012.02.058

DEFRA, 2007, UK CLIM CHANG PROGR

Economidou M, 2011, EUROPE BUILDINGS MI

Ekins P, 2008, ENER POLICY, V36, P4580, DOI 10.1016/j.enpol.2008.09.006

Eleonora Annunziata, 2013, ENERGY, V57, P125  
 European Commission, 2008, COM2008772 EUR COMM  
 European Commission, 2011, COM2011109 EUR COMM  
 FINLOMBARDA SPA, FIN SVIL LOMB  
 Fleiter T, 2012, ENER POLICY, V51, P502, DOI 10.1016/j.enpol.2012.08.054  
 Garrido-Soriano N, 2012, ENER BUILDINGS, V49, P119, DOI 10.1016/j.enbuild.2012.01.030  
 Georgopoulou E, 2006, ENER POLICY, V34, P2012, DOI 10.1016/j.enpol.2005.02.002  
 IPCC, 2007, CLIM CHANG 2007 SYNT  
 Jens Laustsen, 2008, EFFICIENCY REQUIREME  
 JOLLANDS N., 2009, ENERGY EFFICIENCY GO  
 Kavgic M, 2010, BUILD ENVIRON, V45, P1683, DOI 10.1016/j.buildenv.2010.01.021  
 Lam JC, 1996, BUILD RES INF, V24, P131, DOI 10.1080/09613219608727516  
 Lee WL, 2004, PROG ENER COMBUST, V30, P477, DOI 10.1016/j.pecs.2004.03.002  
 Levine MD, 1996, ENER POLICY, V24, P937, DOI 10.1016/S0301-4215(96)80359-4  
 Magrini A, 2012, APPL ENER, V97, P438, DOI 10.1016/j.apenergy.2012.01.012  
 Mlecnik E, 2010, ENER POLICY, V38, P4592, DOI 10.1016/j.enpol.2010.04.015  
 Pasquier S, 2011, INSIGHT SERIES, V2011  
 Salvalai G, 2010, CESB 10: CENTRAL EUROPE TOWARDS SUSTAINABLE BUILDING - FROM THEORY TO PRACTICE, P169  
 Salvalai G., 2010, PORT SB10 INT C SUST, P1  
 Sesana MM, 2013, BUILD ENVIRON, V67, P211, DOI 10.1016/j.buildenv.2013.05.022  
 Szalay AZZ, 2007, BUILD ENVIRON, V42, P1761, DOI 10.1016/j.buildenv.2005.12.003  
 Tronchin L, 2012, ENER POLICY, V48, P176, DOI 10.1016/j.enpol.2012.05.011  
 UNEP, 2007, BUILD CLIM CHANG STA  
 UNI, 2008, TECHN SPEC EN PERF 1  
 Urge-Vorsatz D, 2007, BUILD RES INF, V35, P458, DOI 10.1080/09613210701327384  
 Urge-Vorsatz D, 2007, BUILD RES INF, V35, P379, DOI 10.1080/09613210701325883  
 Wan KKW, 2011, BUILD ENVIRON, V46, P223, DOI 10.1016/j.buildenv.2010.07.016  
 [Anonymous], 2010, IMPLEMENTING ENERGY  
 NR 45  
 TC 15  
 Z9 15  
 U1 0  
 U2 7  
 PU PERGAMON-ELSEVIER SCIENCE LTD  
 PI OXFORD  
 PA THE BOULEVARD, LANGFORD LANE, KIDLINGTON, OXFORD OX5 1GB, ENGLAND  
 SN 1364-0321  
 J9 RENEW SUST ENER REV  
 JI Renew. Sust. Energ. Rev.  
 PD FEB  
 PY 2015  
 VL 42  
 BP 1245  
 EP 1259  
 DI 10.1016/j.rser.2014.10.038  
 PG 15  
 WC GREEN & SUSTAINABLE SCIENCE & TECHNOLOGY; Energy & Fuels  
 SC Science & Technology - Other Topics; Energy & Fuels  
 GA AZ2TI  
 UT WOS:000348084800094  
 DA 2018-05-03  
 ER  
  
 PT J  
 AU Streimikiene, D  
 AF Streimikiene, Dalia  
 TI Residential energy consumption trends, main drivers and policies in



Lithuania

SO RENEWABLE & SUSTAINABLE ENERGY REVIEWS

LA English

DT Review

DE Residential energy use trends; The main drivers of energy consumption;

Residential buildings; Energy saving potential; Costs

ID EFFICIENCY; FEASIBILITY; BEHAVIOR; DEMAND; SECTOR; COSTS; STOCK

AB Environmental pressure from residential energy use is projected to significantly increase by 2030.

Different environmental policy measures provide different incentives for "environmentally responsive" consumer choices and behavioural responses. There is a great energy saving potential in residential buildings of Lithuania. Compared to the other EU countries with similar climate conditions, energy consumption for residential heating is approximately 1.8 times higher in Lithuania. About 60% of Lithuanian population resides in multi-apartment buildings constructed during 1961-1990. The aim of the paper is to define the main drivers of residential energy use in Lithuania and to compare energy saving technologies in terms of energy saving potential and costs in Lithuanian residential buildings. Seeking to achieve the aim the main tasks of the paper are to analyse theoretical issues of the main drivers of residential energy use; to analyse residential energy use trends in Lithuania and to compare these trends with other EU member states; to define the main drivers of residential energy use by applying correlation analysis; to analyse policies aiming to reduce energy consumption in residential buildings and their impacts on GHG emission reduction.

The comparative study of residential energy use in Lithuania and several old EU member states showed that residential energy use per capita in Lithuania is significantly lower than in old EU member states because of the lower income per capita and lower living standards. The economic and technological factors are the main driving forces of final energy consumption in all compared EU member states; however the impact of different factors varies between countries. The comparative analysis of energy saving and GHG emission reduction potential and costs in residential buildings provided by different studies showed that the most cost-effective instruments were appliance standards, energy efficiency obligations, Demand Side Management programs, public benefit charges and labelling. (C) 2014 Elsevier Ltd. All rights reserved.

C1 Lithuanian Sports Univ, Sports Sci & Innovat Inst, LT-44221 Kaunas, Lithuania.

RP Streimikiene, D (reprint author), Lithuanian Sports Univ, Sports Sci & Innovat Inst, Sporto G 6, LT-44221 Kaunas, Lithuania.

EM dalia@mail.lei.lt

OI Streimikiene, Dalia/0000-0002-3247-9912

FU Research Council of Lithuania [MIP-004/2012]

FX This research was funded by a grant (No. MIP-004/2012) from the Research Council of Lithuania.

CR AJZEN I, 1991, ORGAN BEHAV HUM DEC, V50, P179, DOI 10.1016/0749-5978(91)90020-T

Aune M., 2002, NEEDS ROLES PARTICIP

Balezentis A, 2011, ENER POLICY, V39, P7322, DOI 10.1016/j.enpol.2011.08.055

BOHI DR, 1984, ANNU REV ENERGY, V9, P105, DOI 10.1146/annurev.eg.09.110184.000541

Dahl C., 1993, SURVEY ENERGY DEMAND

Darby S, 2010, BUILD RES INF, V38, P442, DOI 10.1080/09613218.2010.492660

Espey J. A., 2004, Journal of Agricultural and Applied Economics, V36, P65

Fransson N, 1999, J ENVIRON PSYCHOL, V19, P369, DOI 10.1006/jev.1999.0141

Fraunhofer ISI Enerdata ISIS Technical University Vienna Wuppertal Institute, 2009, STUD EN SAV POT

EU M

Harmelink M, 2008, ENER EFFIC, V1, P131, DOI 10.1007/s12053-008-9007-9

Jakob M, 2006, ENER POLICY, V34, P172, DOI 10.1016/j.enpol.2004.08.039

Janulis M, 2010, ALTERNATYVLU ENERGIJ

Jaraminiene E, 2012, ENV RES ENG MANAGEME, V1, P23

Johnston D, 2005, ENER POLICY, V33, P1643, DOI 10.1016/j.enpol.2004.02.003

Kaufmann Daniel, 2010, 5430 WORLD BANK

Kavgic M, 2010, BUILD ENVIRON, V45, P1683, DOI 10.1016/j.buildenv.2010.01.021

Kittipongvises S, 2013, INT J ENV SCI DEV, V4, P3

Leth-Petersen S, 2002, ENERGY J, V23, P57

Levinson A, 2004, RESOUR ENERGY ECON, V26, P51, DOI [10.1016/S0928-7655(03)00047-2, 10.1016/50928-7655(03)00047-2]

Lopes MAR, 2012, RENEW SUST ENER REV, V16, P4095, DOI 10.1016/j.rser.2012.03.034

Lutzenheiser L, 2002, EXLORATORY ANAL RESI  
LUTZENHISER L, 1993, ANNU REV ENERG ENV, V18, P247, DOI 10.1146/annurev.energy.18.1.247  
Mikalauskiene A, 2012, INT P EC DEV RES JEJ, P105  
Milutiene E, 2010, ENV RES ENG MANAG, V1, P63  
Ministry of Environment of Republic of Lithuania, 2013, NAT GREENH GAS EM IN  
Ministry of Foreign Affairs of the Republic of Lithuania, 2011, COSTS IMPL LITH COMM  
Nemet GF, 2007, ENERG POLICY, V35, P746, DOI 10.1016/j.enpol.2005.12.012  
Persson J, 2013, APPL ENERG, V112, P975, DOI 10.1016/j.apenergy.2013.03.047  
Sjoberg L., 2005, LIFESTYLES CONSUMER  
Streimikiene D, 2011, RENEW SUST ENERG REV, V5, P4118  
Streimikiene D, 2012, ENERGETIKA, V58, P117  
Urge-Vorsatz D, 2008, ENERG POLICY, V36, P642, DOI 10.1016/j.enpol.2007.10.009  
United Nations Environment Programme (UNEP), 2007, ASS POL INSTR RED GR  
NR 33  
TC 15  
Z9 15  
U1 0  
U2 24  
PU PERGAMON-ELSEVIER SCIENCE LTD  
PI OXFORD  
PA THE BOULEVARD, LANGFORD LANE, KIDLINGTON, OXFORD OX5 1GB, ENGLAND  
SN 1364-0321  
J9 RENEW SUST ENERG REV  
JI Renew. Sust. Energ. Rev.  
PD JUL  
PY 2014  
VL 35  
BP 285  
EP 293  
DI 10.1016/j.rser.2014.04.012  
PG 9  
WC GREEN & SUSTAINABLE SCIENCE & TECHNOLOGY; Energy & Fuels  
SC Science & Technology - Other Topics; Energy & Fuels  
GA ALOFM  
UT WOS:000338802800023  
DA 2018-05-03  
ER  
  
PT J  
AU Xiao, H  
    Wei, QP  
    Wang, HL  
AF Xiao, He  
    Wei, Qingpeng  
    Wang, Hailin  
TI Marginal abatement cost and carbon reduction potential outlook of key  
    energy efficiency technologies in China's building sector to 2030  
SO ENERGY POLICY  
LA English  
DT Article  
DE CO2 abatement cost; Building sector; China  
AB China achieved an energy savings of 67.5 Mtce in the building sector at the end of the 11th Five-Year Plan and set a new target of 116 Mtce by the end of the 12th Five-Year Plan. In this paper, an improved bottom-up model is developed to assess the carbon abatement potential and marginal abatement cost (MAC) of 34 selected energy-saving technologies/measures for China's building sector. The total reduction potential is 499.8 million t-CO<sub>2</sub> by 2030. 4.8 Gt-CO<sub>2</sub> potential will be achieved cumulatively to 2030. By 2030, total primary energy consumption of Chinese building sector will rise continuously to 1343 Mtce in the reference scenario and 1114 Mtce in the carbon reduction scenario. Total carbon dioxide emission will rise

to 2.39 Gt-CO<sub>2</sub> and 1.9 Gt-CO<sub>2</sub> in two scenarios separately. The average carbon abatement cost of the aforementioned technologies is 19.5 \$/t-CO<sub>2</sub>. The analysis reveals that strengthening successfully energy-saving technologies is important, especially for the residential building sector. The central government's direct investments in such technologies should be reduced without imposing significant negative effects.

(C) 2014 Elsevier Ltd. All rights reserved.

C1 [Xiao, He; Wei, Qingpeng] Tsinghua Univ, Sch Architecture, Dept Bldg Sci & Technol, Beijing 100084, Peoples R China.

[Wang, Hailin] Tsinghua Univ, Inst Energy Environm & Econ, Beijing 100084, Peoples R China.

RP Wei, QP (reprint author), Tsinghua Univ, Bldg Energy Res Ctr, Beijing 100084, PA, Peoples R China.

EM qpwei@tsinghua.edu.cn

CR Brown MA, 2001, ENER POLICY, V29, P1197, DOI 10.1016/S0301-4215(01)00067-2

CDRF, 2010, NEW URB CHIN PEOPL C

CEACES, 2009, 2050 CHIN EN CO2 EM

DeCanio S., 1993, ENER POLICY, V9, P906

DOE, 2012, BUILD EN DAT BOOK 20

ECOFYS, 2009, HIDD COSTS BEN DOM E

Ecom J. Y., 2012, ENERGY, V46, P405

ETP, 2010, EN TECHN PERSP

Fabian K., 2011, ENVIRON SCI POLICY, V14, P1195

Groenenberg H., 2007, GHG MARGINAL ABATEME

Hausman J. A., 1979, BELL J ECON, V10, P22

Hendriks C., 2001, ECOFYS ENERGY ENV

International Energy Agency (IEA), 2010, EN STAT NON OECD COU

IEA, 2010, EN STAT OECD COUNTR

IEA, 2011, INT EN OUTL

JAFFE AB, 1994, RESOUR ENERGY ECON, V16, P91, DOI 10.1016/0928-7655(94)90001-9

Jiang K.J., 2011, 2 ASSESSMENT REPOR 3, P402

LBNL, 2012, LBNL4866E ENV EN TEC

Li Z.J., 2007, STUDY LIFE CYCLE CON, P2011

Liu A.Q., 2011, APPL ANAL EVALUATION, P2011

McKinsey, 2007, COST CURV GREENH GAS

McKinsey & Company, 2007, CHIN GREEN REV PRIOR

MOHURD, 2011, 25 MOHURD

MOHURD, 2012, SPEC PLAN B IN PRESS

Mortimer ND, 1998, ENER POLICY, V26, P615, DOI 10.1016/S0301-4215(98)00019-6

Rabl A., 2007, P EN SUST JUN 27 30

Ruderman, 1987, ENERGY J, V8, P101

United Nations, 2010, POP DIV DEP EC SOC A

WEO, 2007, WORLD EN OUTL 2007 C

Xu Wei, 2011, DEV HEAP PUMP CHINA

Zhang S., 2010, FRONT ENERGY POWER E, V4, P2

NR 31

TC 15

Z9 16

U1 4

U2 30

PU ELSEVIER SCI LTD

PI OXFORD

PA THE BOULEVARD, LANGFORD LANE, KIDLINGTON, OXFORD OX5 1GB, OXON, ENGLAND

SN 0301-4215

EI 1873-6777

J9 ENER POLICY

J1 Energy Policy

PD JUN

PY 2014

VL 69

BP 92

EP 105

DI 10.1016/j.enpol.2014.02.021

PG 14

WC Economics; Energy & Fuels; Environmental Sciences; Environmental Studies

SC Business & Economics; Energy & Fuels; Environmental Sciences & Ecology

GA AH9MX

UT WOS:000336467600010

DA 2018-05-03

ER

PT J

AU Wilkerson, JT

Cullenward, D

Davidian, D

Weyant, JP

AF Wilkerson, Jordan T.

Cullenward, Danny

Davidian, Danielle

Weyant, John P.

TI End use technology choice in the National Energy Modeling System (NEMS):

An analysis of the residential and commercial building sectors

SO ENERGY ECONOMICS

LA English

DT Article

DE Energy models; Consumer preferences; Behavior; Energy forecasting

ID IMPACTS; POLICY; GENERATION; ECONOMICS; FORECASTS

AB The National Energy Modeling System (NEMS) is arguably the most influential energy model in the United States. The U.S. Energy Information Administration uses NEMS to generate the federal government's annual long-term forecast of national energy consumption and to evaluate prospective federal energy policies. NEMS is considered such a standard tool that other models are calibrated to its forecasts, in both government and academic practice. As a result, NEMS has a significant influence over expert opinions of plausible energy futures. NEMS is a massively detailed model whose inner workings, despite its prominence, receive relatively scant critical attention.

This paper analyzes how NEMS projects energy demand in the residential and commercial sectors. In particular, we focus on the role of consumers' preferences and financial constraints, investigating how consumers choose appliances and other end-use technologies. We identify conceptual issues in the approach the model takes to the same question across both sectors. Running the model with a range of consumer preferences, we estimate the extent to which this issue impacts projected consumption relative to the baseline model forecast for final energy demand in the year 2035. In the residential sector, the impact ranges from a decrease of 0.73 quads (-6.0%) to an increase of 0.24 quads (+2.0%). In the commercial sector, the impact ranges from a decrease of 1.0 quads (-9.0%) to an increase of 0.99 quads (+9.0%). (C) 2013 Elsevier B.V. All rights reserved.

C1 [Wilkerson, Jordan T.; Davidian, Danielle; Weyant, John P.] Stanford Univ, Dept Management Sci & Engrn, Stanford, CA 94305 USA.

[Cullenward, Danny] Stanford Univ, Environm & Resources E IPER, Stanford, CA 94305 USA.

[Cullenward, Danny] Stanford Law Sch, Stanford, CA 94305 USA.

RP Wilkerson, JT (reprint author), 475 Via Ortega, Suite 2530, Stanford, CA 94305 USA.

EM wilkejt1@stanford.edu; dcullenward@stanford.edu; davidian@stanford.edu; weyant@stanford.edu

OI Cullenward, Danny/0000-0002-6803-9572; Wilkerson, Jordan/0000-0003-1447-9465

CR ASCHER W, 1978, FORECASTING APPRAISA

Auffhammer M, 2007, RESOUR ENERGY ECON, V29, P102, DOI 10.1016/j.reseneeco.2006.05.001

Bataille C, 2006, ENERG J, P93

Brown MA, 2001, ENERG POLICY, V29, P1177, DOI 10.1016/S0301-4215(01)00102-1

Brown MA, 2010, ENERG POLICY, V38, P7665, DOI 10.1016/j.enpol.2010.07.057

Chandel MK, 2011, ENERG POLICY, V39, P6234, DOI 10.1016/j.enpol.2011.07.022

Chien D., 2005, J TRANSP STAT, V8, P43

Creyts Jon, 2007, REDUCING US GREENHOU

Cullenward D., 2009, AM STAT ASS COMM EN  
 Energy Information Administration (EIA), 2010, DOEEIAM0572010  
 Energy Information Administration (EIA), 2010, DOEEIAM0662010  
 Energy Information Administration (EIA), 2011, DOEEIAM0662011  
 \*EIA, 1998, SROIAF9803 EN INF AD  
 Energy Information Administration (EIA), 2009, DOEEIA05812009  
 Energy Information Administration (EIA), 2010, DOEEIAM0672010  
 Energy Information Administration (EIA), 2012, DOEEIA06402011  
 EIA, 2011, DOEEIA03832011  
 Energy Information Administration (EIA), 2010, DOEEIA03832010  
 Energy Information Administration (EIA), 2010, DOEEIA05542010  
 EMF, 2011, EMF 25 SUMM REP EN E  
 Fischer C, 2009, RESOUR ENERGY ECON, V31, P198, DOI 10.1016/j.reseneeco.2009.04.003  
 Gillingham K, 2012, ENERG J, V33, P37, DOI 10.5547/01956574.33.2.3  
 Gillingham K, 2009, ANNU REV RESOUR ECON, V1, P597, DOI 10.1146/annurev.resource.102308.124234  
 Granade H. C., 2009, UNLOCKING ENERGY EFF  
 Haq Z, 2006, APPL BIOCHEM BIOTECH, V129, P3, DOI 10.1385/ABAB:129:1:3  
 Hobbs M, 2001, INTERFACES, V31, P24, DOI 10.1287/inte.31.5.24.9651  
 Huntington H.G., 2011, ENERGY J STRATEGIES, P7  
 Illic M.D., 2011, IEEE POW EN SOC GEN  
 Interlaboratory Working Group,, 2000, ORNLCON476 INT WORK  
 Koomey JG, 2002, TECHNOL FORECAST SOC, V69, P511, DOI 10.1016/S0040-1625(01)00153-6  
 Koomey JG, 2001, ENERG POLICY, V29, P1209, DOI 10.1016/S0301-4215(01)00068-4  
 Koomey J. G., 1990, THESIS U CALIFORNIA  
 Kydes AS, 2007, ENERG POLICY, V35, P809, DOI 10.1016/j.enpol.2006.03.002  
 Kydes AS, 1999, ENERGY J, V20, P93  
 Lady GM, 2010, ENERG ECON, V32, P450, DOI 10.1016/j.eneco.2009.10.006  
 Luong T, 1998, INTERFACES, V28, P1, DOI 10.1287/inte.28.2.1  
 Morris SC, 2002, ENVIRON MODEL ASSESS, V7, P207, DOI 10.1023/A:1016332907313  
 Morrow RW, 2010, ENERG POLICY, V38, P1305  
 National Research Council (NRC), 1992, NAT EN MOD SYST  
 Sanstad AH, 2001, ENERG POLICY, V29, P1299, DOI 10.1016/S0301-4215(01)00074-X  
 Shogren JF, 2008, REV ENV ECON POLICY, V2, P26, DOI 10.1093/reep/rem027  
 Winebrake JJ, 2006, ENERG POLICY, V34, P3475, DOI 10.1016/j.enpol.2005.07.018  
 NR 42  
 TC 15  
 Z9 15  
 U1 2  
 U2 18  
 PU ELSEVIER SCIENCE BV  
 PI AMSTERDAM  
 PA PO BOX 211, 1000 AE AMSTERDAM, NETHERLANDS  
 SN 0140-9883  
 EI 1873-6181  
 J9 ENERG ECON  
 JI Energy Econ.  
 PD NOV  
 PY 2013  
 VL 40  
 BP 773  
 EP 784  
 DI 10.1016/j.eneco.2013.09.023  
 PG 12  
 WC Economics  
 SC Business & Economics  
 GA 281DX  
 UT WOS:000329081300072  
 DA 2018-05-03

ER

PT J

AU Doyle, R

Davies, AR

AF Doyle, Ruth

Davies, Anna R.

TI Towards sustainable household consumption: exploring a practice oriented, participatory backcasting approach for sustainable home heating practices in Ireland

SO JOURNAL OF CLEANER PRODUCTION

LA English

DT Article

DE Ireland; Household consumption; Participatory backcasting; Visioning workshops; Sustainability assessment; Social practice

ID STAKEHOLDER PARTICIPATION; TRANSITION; FUTURE; POLICY

AB Current attempts to encourage sustainable consumption are failing to make significant advancements and consumption by households in daily practices continues to grow. Interventions in this area are often based on simplistic behavioural assumptions, which overlook the embeddedness of daily consumption practices and fail to challenge escalating consumption demands and expectations. Against this background there is a need to consider more radical socio-cultural, technological and organisational innovations that may fulfil the goals of daily practices more sustainably in the future. Taking the case of home heating, the most energy intensive practice in Irish households, this paper reports on a participatory backcasting study that developed future scenarios and action plans for sustainable heating. In contrast to conventional behavioural change models and forecasting techniques, this study adopted a social practice orientation. This paper focuses on the operationalisation of the social practice approach with special reference to the iterative processes around scenario development and the resultant backcasting outputs. Participant evaluations of the procedure are presented which indicate that despite significant operational complexity, the process was strongly valued and provided significant opportunity for learning amongst stakeholders involved. Whether such approaches can be integrated into governing systems, however will depend on a willingness amongst stakeholders to embrace a radical reconceptualisation of behaviour. (C) 2012 Elsevier Ltd. All rights reserved.

C1 [Doyle, Ruth; Davies, Anna R.] Univ Dublin Trinity Coll, Dept Geog, Dublin 2, Ireland.

RP Doyle, R (reprint author), Univ Dublin Trinity Coll, Dept Geog, Museum Bldg, Dublin 2, Ireland.

EM rdoyle4@tcd.ie

OI Davies, Anna/0000-0002-3045-8552

CR Akrich M, 1992, SHAPING TECHNOLOGY B, P259

Borjeson L, 2006, FUTURES, V38, P723, DOI 10.1016/j.futures.2005.12.002

Brezet JC, 2001, DESIGN ECOEFFICIENT

Brooks D.B., 2009, MAKING MOST WATER WE

Brown HS, 2003, TECHNOL ANAL STRATEG, V15, P291, DOI 10.1080/09537320310001601496

Darby S., 2009, IS MORE FEEDBACK WAT

Davies AR, 2012, AREA, V44, P54, DOI 10.1111/j.1475-4762.2011.01054.x

Davies A. R., 2012, J CON POL, V34, P25

Diaz-lopez F., 2009, JOINT ACT CLIM CHANG

Dreborg KH, 1996, FUTURES, V28, P813, DOI 10.1016/S0016-3287(96)00044-4

EC, 2011, BACKGR PAP EN ROADM

Elzen B, 2004, SYSTEM INNOVATION TR

Green K, 2002, FUTURES, V34, P381, DOI 10.1016/S0016-3287(01)00066-0

Guy S., 2000, SOCIOLOGY ENERGY BUI

Halme M, 2004, ECOL ECON, V51, P125, DOI 10.1016/j.ecolecon.2004.04.007

HAND M, 2005, SOCIOL RES ONLINE, P10

Hargreaves T, 2008, LOCAL ENVIRON, V13, P743, DOI 10.1080/13549830802475666

IEA, 2011, WORLD EN OUTL

Jansen J.L.A., 1992, SUSTAINABLE DEV CHAL

Kallbekken S, 2011, ENERG POLICY, V39, P2966, DOI 10.1016/j.enpol.2011.03.006

Kern F, 2008, ENERG POLICY, V36, P4093, DOI 10.1016/j.enpol.2008.06.018

Kok K, 2011, TECHNOL FORECAST SOC, V78, P835, DOI 10.1016/j.techfore.2011.01.004

Kujer L., 2012, J DESIGN RES, V10, P67  
 Larsen K., 2009, HABITAT INT, V33, P260, DOI 10.1016/j.habitatint.2008.10.007  
 Latouche S., 2010, J CLEAN PROD, V18, P511  
 LOREK S., 2001, ENV SUSTAINABLE HOUS  
 Moll S., 2011, EUROSTAT STAT FOCUS  
 OECD, 2002, SUST HOUS CONS OECD  
 Quist J., 2001, INT J SUST DEV WORLD, V4, P75, DOI DOI 10.1504/IJSD.2001.001547  
 Quist J., 2007, THESIS TU DELFT DELF  
 Quist J., 2006, FUTURES, V38, P1027, DOI 10.1016/j.futures.2006.02.010  
 Quist J., 2011, TECHNOL FORECAST SOC, V78, P883, DOI 10.1016/j.techfore.2011.01.011  
 Reckwitz A., 2002, EUR J SOC THEORY, V5, P243, DOI [10.1177/13684310222225432, DOI 10.1177/13684310222225432]  
 Ropke I., 2009, ECOL ECON, V68, P2490, DOI 10.1016/j.ecolecon.2009.05.015  
 Rotmans J., 2001, FORESIGHT, V3, P1, DOI DOI 10.1108/14636680110803003  
 Sanne C., 2002, ECOL ECON, V42, P273, DOI 10.1016/S0921-8009(02)00086-1  
 Schnelle E., 1979, METAPLAN METHOD COMM  
 Scott K., 2012, DESIGN STUD, V33, P279, DOI 10.1016/j.destud.2011.08.002  
 SEAI, 2008, EN RES SECT SUST EN  
 Seyfang G., 2009, NEW EC SUSTAINABLE C  
 Shipworth M., 2005, 7 NORD ENV SOC SCI R  
 Shove E., 2003, COMFORT CLEANLINESS  
 Shove E., 2008, DESIGN EVERYDAY LIFE  
 Smith A., 2005, RES POLICY, V34, P1491, DOI 10.1016/j.respol.2005.07.005  
 Southerton D., 2004, SUSTAINABLE CONSUMPT  
 Spaargaren G., 2003, SOC NATUR RESOUR, V16, P687, DOI 10.1080/08941920390217429  
 Spaargaren G., 2005, 3 WORKSH UKWIR SEM S  
 Tite L., 2003, TOOLSUST DELIVERABLE  
 van de Kerkhof M., 2005, TECHNOL FORECAST SOC, V72, P733, DOI 10.1016/j.techfore.2004.10.002  
 Wangel J., 2011, TECHNOL FORECAST SOC, V78, P872, DOI 10.1016/j.techfore.2011.03.007  
 Warde A., 2005, J CONSUM CULT, V5, P131, DOI DOI 10.1177/1469540505053090

NR 51

TC 15

Z9 15

U1 0

U2 21

PU ELSEVIER SCI LTD

PI OXFORD

PA THE BOULEVARD, LANGFORD LANE, KIDLINGTON, OXFORD OX5 1GB, OXON, ENGLAND

SN 0959-6526

J9 J CLEAN PROD

JI J. Clean Prod.

PD JUN

PY 2013

VL 48

BP 260

EP 271

DI 10.1016/j.jclepro.2012.12.015

PG 12

 WC GREEN & SUSTAINABLE SCIENCE & TECHNOLOGY; Engineering, Environmental;  
 Environmental Sciences

 SC Science & Technology - Other Topics; Engineering; Environmental Sciences  
 & Ecology

GA 169BD

UT WOS:000320751000028

DA 2018-05-03

ER

PT J

AU Puksec, T  
Mathiesen, BV  
Duic, N

AF Puksec, Tomislav  
Mathiesen, Brian Vad  
Duic, Neven

TI Potentials for energy savings and long term energy demand of Croatian households sector

SO APPLIED ENERGY

LA English

DT Article

DE Energy demand; Forecast; Households sector; Energy efficiency; Bottom-up modelling

ID RESIDENTIAL BUILDINGS; CONSUMPTION; SYSTEM

AB Households represent one of the most interesting sectors, when analyzing Croatia's energy balance. It makes up one of the largest energy consumers with around 75 PJ per year, which is almost 29% of Croatia's final energy demand. Considering this consumption, implementing various mechanisms, which would lead to improvements in energy efficiency of this sector, seems relevant. In order to plan future energy systems, important would be to know future possibilities and needs regarding energy demand of different sectors. Through this paper, long term energy demand projections of Croatian households sector will be shown. Focus of the paper will be on various mechanisms influencing future energy demand scenarios. Important would be to quantify this influence, whether positive or negative, and see which mechanisms would be the most significant. Energy demand projections in this paper are based upon bottom-up approach model which combines and processes a large number of input data. The model will be compared to Croatian National Energy Strategy and certain differences and conclusions will be presented. One of the major conclusions shown in this paper is significant possibilities for energy efficiency improvements and lower energy demand in the future, based on careful and rational energy planning. Different financial, legal and technological mechanisms can lead to significant savings in the households sector which leads to lower GHG emissions and lower Croatian dependence on foreign fossil fuels. (C) 2012 Elsevier Ltd. All rights reserved.

C1 [Puksec, Tomislav; Duic, Neven] Univ Zagreb, Fac Mech Engn & Naval Architecture, Zagreb 10000, Croatia.

[Mathiesen, Brian Vad] Aalborg Univ, Dept Dev & Planning, DK-9000 Aalborg, Denmark.

RP Puksec, T (reprint author), Univ Zagreb, Fac Mech Engn & Naval Architecture, Ivana Lucica 5, Zagreb 10000, Croatia.

EM tomislav.puksec@fsb.hr; bvm@plan.aau.dk; neven.duic@fsb.hr

RI Duic, Neven/J-5242-2012; Mathiesen, Brian Vad/E-3551-2016

OI Duic, Neven/0000-0003-2376-6466; Mathiesen, Brian Vad/0000-0003-3917-1184

CR Aste N, 2010, APPL ENERG, V87, P629, DOI 10.1016/j.apenergy.2009.05.029

Aydinalp M, 2004, APPL ENERG, V79, P159, DOI 10.1016/j.apenergy.2003.12.006

Connolly D, 2011, APPL ENERG, V88, P502, DOI 10.1016/j.apenergy.2010.03.006

Cosic B, 2011, APPL THERM ENG

[Anonymous], 2008, 1531631 DIN EN

Duic N, 2005, ENERG POLICY, V33, P1003, DOI 10.1016/j.enpol.2003.10.022

Graus W., 2008, GLOBAL LOW ENERGY DE

International Energy Agency, WORLD EN MOD

[Anonymous], 2008, 13790 ISO

Kannan R, 2009, APPL ENERG, V86, P416, DOI 10.1016/j.apenergy.2008.08.005

Krajacic G, 2011, APPL THERM ENG, V31, P2073, DOI 10.1016/j.applthermaleng.2011.03.014

Krajacic G, 2011, APPL ENERG, V88, P508, DOI 10.1016/j.apenergy.2010.09.006

Lund H, 2011, ENERG BUILDINGS, V43, P1646, DOI 10.1016/j.enbuild.2011.03.006

Marszal AJ, 2011, ENERG BUILDINGS, V43, P971, DOI 10.1016/j.enbuild.2010.12.022

[Anonymous], 2008, AD UPGR CROAT EN STR

Murata A, 2008, APPL ENERG, V85, P1113, DOI 10.1016/j.apenergy.2007.05.008

[Anonymous], 2010, EN EFF IND EUR

Ostergaard PA, 2010, ENERGY, V35, P4892, DOI 10.1016/j.energy.2010.08.041

Peeters L, 2009, APPL ENERG, V86, P772, DOI 10.1016/j.apenergy.2008.07.011



Popescu D, 2012, APPL ENERG, V89, P454, DOI 10.1016/j.apenergy.2011.08.015  
Schneider DR, 2007, ENERGY, V32, P1731, DOI 10.1016/j.energy.2006.12.003  
Segurado R, 2011, APPL ENERG, V88, P466, DOI 10.1016/j.apenergy.2010.07.005  
Shimoda Y, 2010, APPL ENERG, V87, P1944, DOI 10.1016/j.apenergy.2009.10.021  
Swan LG, 2009, RENEW SUST ENERG REV, V13, P1819, DOI 10.1016/j.rser.2008.09.033  
Vuk B, 2009, ANN ENERGY REPORT EN  
Wan KSY, 2004, APPL ENERG, V77, P69, DOI 10.1016/S0306-2619(03)00104-1

NR 26

TC 15

Z9 15

U1 0

U2 14

PU ELSEVIER SCI LTD

PI OXFORD

PA THE BOULEVARD, LANGFORD LANE, KIDLINGTON, OXFORD OX5 1GB, OXON, ENGLAND

SN 0306-2619

J9 APPL ENERG

J1 Appl. Energy

PD JAN

PY 2013

VL 101

SI SI

BP 15

EP 25

DI 10.1016/j.apenergy.2012.04.023

PG 11

WC Energy & Fuels; Engineering, Chemical

SC Energy & Fuels; Engineering

GA 058ER

UT WOS:000312617400004

DA 2018-05-03

ER

PT J

AU Chin, J

Callaghan, V

Clarke, G

AF Chin, Jeannette

Callaghan, Vic

Clarke, Graham

TI Soft-appliances: A vision for user created networked appliances in digital homes

SO JOURNAL OF AMBIENT INTELLIGENCE AND SMART ENVIRONMENTS

LA English

DT Article

DE Digital homes; virtual appliances; service aggregation; disruptive technology; future homes

AB In this paper we introduce a vision for a new type of domestic appliance, a soft-appliance, constructed from aggregations of elementary network services. The vision is based on the possibility of 'deconstructing', logically, conventional home appliances such as TVs into their elemental functions which may then be combined in novel ways with other deconstructed services to generate soft-appliance of a person's own choosing. Additionally our aim is to describe the computer science challenges involved in fulfilling this vision. An essential component of this vision is a concept called a MAp (meta-appliance/application); a semantic data template that describes the soft or virtual-appliance that can be instantiated by manufacturers and end-users in a way that redefines the nature of an appliance and which can be created, owned and traded. We also present a socio-technical framework to motivate the discussion of this research agenda, especially the use of the agent technology that would be needed to realise this vision.

C1 [Chin, Jeannette; Callaghan, Vic; Clarke, Graham] Univ Essex, Colchester CO4 3SQ, Essex, England.

RP Chin, J (reprint author), Univ Essex, Colchester CO4 3SQ, Essex, England.

EM jschin@essex.ac.uk; vic@essex.ac.uk; graham@essex.ac.uk

CR Abowd G. D., 2000, ACM Transactions on Computer-Human Interaction, V7, P29, DOI

10.1145/344949.344988

Augusto J. C., 2006, LECT NOTES COMPUTER, V4008

Callaghan V., 2008, INTELLIGENT BUILDING, V1, P1

CALLAGHAN V, 2006, SPRINGER VERLAG BOOK

Chen H., 2004, INT C MOB UB SYST NE

Chin J, 2008, IET INT C INT ENV 20

Cook DJ, 2006, LECT NOTES COMPUT SC, V4008, P165

CRABTREE A, 2003, P 5 ANN C UB COMP OC

DAVID PC, 2002, OA 02

DAVIS N, 2002, IEEE PERSVASIVE COMPU, V1

DURANLIMON HA, 2004, IEEE DISTRIBUTED SYS, V5

DYBKYAER L, 2000, NAT LANGUAGE ENG

Edlund J, 2004, P ICSLP

Gajos K., 2002, PERSVASIVE 2002

Hagras H, 2004, IEEE INTELL SYST, V19, P12, DOI 10.1109/MIS.2004.61

Hague R., 2003, P UBICOMP 2003, P169

Horan B., 2005, TR2005131 SUN MICR R

Humble J, 2003, LECT NOTES COMPUT SC, V2864, P256

JOHNSON B, 2008, IET INT C INT ENV SE

KOPP S, 2007, AGENT TECHNOLOGY

LEIBERMAN H, 2000, SPECIAL ISSUE COMMUN

Limb R., 2005, P IEE WORKSH PERSP P

MASUOKA R, 2003, 2 INT SEM WEB C ISWC

Mozer M. C., 1998, P AM ASS ART INT SPR, P110

OGRADY MJ, 2007, HDB RES USER INTERFA

QUANTRILL M, 2003, IASTED INT C COMM IN

QUESADA JF, 2001, DIALOGUE MANAGEMENT, P89

SEREMETI L, 2008, IET INT C INT ENV 20

SHUMAO O, 2008, CONTROL BRIDGE AUTOM

Truong KN, P UB 2004, P143

WANG ZY, 2000, CMUCS00154

WEISE T, 2007, WEB SERVICE COMPOSIT

ZAMUDIO V, 2008, INT T SYST SCI APPL, V4

OWL S ONTOLOGY WEB L

NR 34

TC 15

Z9 15

U1 0

U2 1

PU IOS PRESS

PI AMSTERDAM

PA NIEUWE HEMWEG 6B, 1013 BG AMSTERDAM, NETHERLANDS

SN 1876-1364

J9 J AMB INTEL SMART EN

J1 J. Ambient Intell. Smart Environ.

PY 2009

VL 1

IS 1

BP 69

EP 75

DI 10.3233/AIS-2009-0010

PG 7

WC Computer Science, Artificial Intelligence; Computer Science, Information Systems; Telecommunications

SC Computer Science; Telecommunications  
 GA V16AC  
 UT WOS:000207841500011  
 DA 2018-05-03  
 ER

PT J

AU Bertoldi, P  
 Atanasiu, B

AF Bertoldi, Paolo  
 Atanasiu, Bogdan

TI Characterization of residential lighting consumption in the enlarged  
 European Union and policies to save energy

SO INTERNATIONAL JOURNAL OF GREEN ENERGY

LA English

DT Article

DE lighting; energy savings; compact fluorescent lamps; monitoring  
 consumption

AB Lighting represents a considerable share of the electricity consumption in the residential sector of the enlarged European Union (EU-27). Although most citizens are well aware that lighting is an important part of their electricity consumption, they are still either unaware of the benefits of installing efficient lighting technologies or are reluctant to change their habits. The European Commission has promoted the reduction of lighting consumption through a number of policies and programmes, which together with successful national and utility driven programmes have contributed to a substantial market transformation in some Member States. However, there is still a large cost-effective saving potential of at least 12.8 TWh per year in the EU-27. With more aggressive policies the saving potential could reach 24.1 TWh. These savings can be achieved in a rather short time (e.g. by 2010), due to the fast turnover of lamps. This paper provides updated information on the lighting consumption in the residential sector, the penetration of efficient technologies and estimates of the saving potential if new policies and programmes for the reduction of residential lighting consumption are introduced. In particular the role of promotional campaigns, efficiency standards, building codes, and white certificates are discussed. Last but not least, the paper calls for the collection of more accurate end-use data to assess in a more accurate manner the saving potential in residential lighting.

C1 [Bertoldi, Paolo; Atanasiu, Bogdan] Commiss European Communities, DG Joint Res Ctr, Inst Environm & Sustainabil, I-21027 Ispra, VA, Italy.

RP Bertoldi, P (reprint author), Commiss European Communities, DG Joint Res Ctr, Inst Environm & Sustainabil, Via E Fermi 2749, I-21027 Ispra, VA, Italy.

EM paolo.bertoldi@ec.europa.eu

CR BERRUTTO V, 2003, P 3 INT C EN EFF DOM

BERTOLDI P, 2003, P 3 INT C EN EFF DOM

BERTOLDI P, 2007, P 2007 IEPEC C CHIC

BERTOLDI P, 2006, 22 196 EUR EN

BERTOLDI P, 2007, 22753 EUR EN

BLUMBERGA D, 2003, P 3 INT C EN EFF DOM

BURLACU C, 2000, P 2 INT C EN EFF DOM

CALWELL C, 2006, P ACEEE 2004 SUMM ST

\*CLIP, 1997, CLUB ING PROSP EN EN

DASEK M, 2003, P 3 INT C EN EFF DOM

\*DEFU, 1996, MARK RES US EN SAV L

\*ENV CHANG UN, 1998, DOM EFF LIGHT DELIGH

\*ETSU, 2001, COORD ACT MARK EU CO

\*EUR COMM DG JRC, 2004, 21297 EUR EN

GROSEVA V, 2006, COMMUNICATION

JANEIRO V, 2002, EURELECTRIC EUROPEAN

KEVEN V, 2006, P 4 INT C EN EFF DOM

KOFOD C, 2000, 41031Z97030 SAVE

KOFOD C, 2006, COMMUNICATION

LANE K, 2005, P RIGHT LIGHT 6 C SH

Lees E, 2006, EVALUATION ENERGY EF  
 PEREZ TH, 2006, COMMUNICATION  
 PERSSON A, 1997, P RIGHT LIGHT 4 C CO  
 SCHALBURG R, 2006, COMMUNICATION  
 SCHIELLERUP P, 2000, PAPER LOWER CARBON F  
 THOMAS S, 2003, ENERGY EFFICIENCY PR  
 THOMAS S, 1997, P 1 INT C EN EFF DOM  
 \*TNS, 2006, OP SOC SPEC EUR ATT  
 TURDA E, 2003, P 3 INT C EN EFF DOM  
 VENAFRO R, 2005, WHIT CERT WORKSH EC  
 VREULS H, 2000, INDEEP ANAL REPORT I  
 WAIDE P, 2006, P 4 INT C EN EFF DOM  
 WILHELM P, 2006, COMMUNICATION  
 2001, EUROPEAN CLIMATE CHA  
 NR 34  
 TC 15  
 Z9 15  
 U1 1  
 U2 11  
 PU TAYLOR & FRANCIS INC  
 PI PHILADELPHIA  
 PA 325 CHESTNUT ST, SUITE 800, PHILADELPHIA, PA 19106 USA  
 SN 1543-5075  
 J9 INT J GREEN ENERGY  
 JI Int. J. Green Energy  
 PY 2008  
 VL 5  
 IS 1-2  
 BP 15  
 EP 34  
 DI 10.1080/15435070701839397  
 PG 20  
 WC Thermodynamics; GREEN & SUSTAINABLE SCIENCE & TECHNOLOGY; Energy & Fuels  
 SC Thermodynamics; Science & Technology - Other Topics; Energy & Fuels  
 GA 269MX  
 UT WOS:000253654200002  
 DA 2018-05-03  
 ER  
  
 PT J  
 AU Palacios-Garcia, EJ  
     Chen, A  
     Santiago, I  
     Bellido-Outeirino, FJ  
     Flores-Arias, JM  
     Moreno-Munoz, A  
 AF Palacios-Garcia, E. J.  
     Chen, A.  
     Santiago, I.  
     Bellido-Outeirino, F. J.  
     Flores-Arias, J. M.  
     Moreno-Munoz, A.  
 TI Stochastic model for lighting's electricity consumption in the  
     residential sector. Impact of energy saving actions  
 SO ENERGY AND BUILDINGS  
 LA English  
 DT Article  
 DE Residential electricity demand; Lighting consumption; Stochastic models;

LED technology; Reactive power  
ID DEMAND; OCCUPANCY; FUTURE

AB The residential sector represents about 30% of the total energy demand in Europe. Included in this percentage, lighting consumption is one of the basic end uses in all households and it may come to represents 15-20% of the total electricity bill. This figure can be reduced using advanced control techniques or more efficient lighting technologies, requiring previous detailed information about current consumption patterns. In this context, bottom-up stochastic models are established as the main tools to study new energy savings. In this paper, a high-resolution stochastic model for simulating lighting consumption profiles was developed, obtaining both daily active and reactive instantaneous power demand profiles, with a 1-min resolution. The model takes into account the number of household residents and differentiates between weekdays and weekends. Moreover, the monthly and annual amounts of electricity demanded by lighting in Spanish households were simulated. The proposed model was also used to quantify the impact of LED technology's penetration into domestic lighting systems on consumption patterns. Research has revealed the existence of two consumption peaks matching with morning and evening. Although these peaks are hard to shift since they are due to human behavior, they are easy to reduce through the improvement of lighting systems. (C) 2014 Elsevier B.V. All rights reserved.

C1 [Palacios-Garcia, E. J.; Chen, A.; Santiago, I.; Bellido-Outeirino, F. J.; Flores-Arias, J. M.; Moreno-Munoz, A.] Univ Cordoba, Dept AC Elect & TE, Escuela Politecn Super, E-14071 Cordoba, Spain.

RP Santiago, I (reprint author), Univ Cordoba, Dept AC Elect & TE, Escuela Politecn Super, Campus Rabanales, E-14071 Cordoba, Spain.

EM el1sachi@uco.es

RI Moreno-Munoz, Antonio/C-5819-2011; Bellido-Outeirino, Francisco J./G-3201-2016; Santiago, Isabel/N-4131-2015; Flores-Arias, Jose-Maria/F-8699-2016; Palacios-Garcia, Emilio Jose/K-9567-2015

OI Moreno-Munoz, Antonio/0000-0002-7298-3902; Bellido-Outeirino, Francisco J./0000-0002-9385-8123; Santiago, Isabel/0000-0002-6129-2962; Flores-Arias, Jose-Maria/0000-0002-2411-9431; Palacios-Garcia, Emilio Jose/0000-0003-2703-6532

FU Feder-Interconecta project TIGRIS [12013095 (ITC-20131002)]

FX This work is supported by Feder-Interconecta project TIGRIS under contract no. 12013095 (ITC-20131002).

CR Agencia Andaluza de la Energia, 2010, RAD SOL

Arghira N, 2012, ENERGY, V48, P128, DOI 10.1016/j.energy.2012.04.010

Arsov L., 2013, RENEW ENERGY POWER Q, V11, P38

Bladh M, 2008, ENERG POLICY, V36, P3521, DOI 10.1016/j.enpol.2008.06.001

Boardman B., 1995, DOMESTIC EQUIPMENT C

Asociacion Espanola de Domotica - CEDOM. & Instituto para la Diversificacion y Ahorro de la Energia - IDAE, 2008, COM AH EN INST DOM V

de Almeida A, 2011, ENERG BUILDINGS, V43, P1884, DOI 10.1016/j.enbuild.2011.03.027

E.I.A. U.S. Department of Energy, 1993, RES EN CONS SURV REC

European Commission Directorate-General Regional Policy, 2008, GUID COST BEN AN INV

Gamerman D., 2006, MARKOV CHAIN MONTE C

Gil-de-Castro A, 2012, 2012 IEEE 15 INT C H, P585

Gilks W. R., 1996, MARKOV CHAIN MONTE C

Hossen M., 2013, INT J SCI ENG TECHNO, V2, P1982

Humphreys CJ, 2008, MRS BULL, V33, P459, DOI 10.1557/mrs2008.91

HUNT DRG, 1979, BUILD ENVIRON, V14, P21, DOI 10.1016/0360-1323(79)90025-8

PROYECTO SECH-SPAHOUSEC, 2011, AN CONS EN SECT RES

Instituto de Estadistica de Andalucia, 2001, HOG FAM AND

Gago EJ, 2011, ENERG BUILDINGS, V43, P1315, DOI 10.1016/j.enbuild.2011.01.016

Kavgic M, 2010, BUILD ENVIRON, V45, P1683, DOI 10.1016/j.buildenv.2010.01.021

Lopez M. A., 2012, 2012 IEEE Second International Conference on Consumer Electronics - Berlin (ICCE-Berlin), P1, DOI [10.1109/ISSST.2012.6227983, 10.1109/ICCE-Berlin.2012.6336472]

Lopez-Rodriguez MA, 2013, ENERG POLICY, V62, P742, DOI 10.1016/j.enpol.2013.07.095

Mills E., 1995, 3 EUR C EN EFF LIGHT

National Statistics Institute of Spain, 2010, TIM US SURV

Ndiaye D, 2011, ENERG BUILDINGS, V43, P446, DOI 10.1016/j.enbuild.2010.10.008

Reinhart CF, 2004, SOL ENERGY, V77, P15, DOI 10.1016/j.solener.2004.04.003

Richardson I, 2008, ENER BUILDINGS, V40, P1560, DOI 10.1016/j.enbuild.2008.02.006  
 Richardson I, 2009, ENER BUILDINGS, V41, P781, DOI 10.1016/j.enbuild.2009.02.010  
 Sanquist TF, 2012, ENER POLICY, V42, P354, DOI 10.1016/j.enpol.2011.11.092  
 Santiago I, 2014, ENER BUILDINGS, V79, P84, DOI 10.1016/j.enbuild.2014.04.055  
 Stokes M, 2004, ENER BUILDINGS, V36, P103, DOI 10.1016/j.enbuild.2003.10.007  
 Swan LG, 2009, RENEW SUST ENER REV, V13, P1819, DOI 10.1016/j.rser.2008.09.033  
 Torriti J, 2012, ENER POLICY, V44, P199, DOI 10.1016/j.enpol.2012.01.039  
 French D., 1998, REV EUROPEAN COMMUNI, V7, P214, DOI DOI 10.1111/1467-9388.00150  
 Vassileva I, 2012, ENERGY, V46, P94, DOI 10.1016/j.energy.2012.02.069  
 Widen J, 2010, APPL ENER, V87, P1880, DOI 10.1016/j.apenergy.2009.11.006  
 Widen J, 2009, ENER BUILDINGS, V41, P1001, DOI 10.1016/j.enbuild.2009.05.002

NR 36

TC 14

Z9 14

U1 0

U2 9

PU ELSEVIER SCIENCE SA

PI LAUSANNE

PA PO BOX 564, 1001 LAUSANNE, SWITZERLAND

SN 0378-7788

EI 1872-6178

J9 ENER BUILDINGS

JI Energy Build.

PD FEB 15

PY 2015

VL 89

BP 245

EP 259

DI 10.1016/j.enbuild.2014.12.028

PG 15

WC Construction & Building Technology; Energy & Fuels; Engineering, Civil

SC Construction & Building Technology; Energy & Fuels; Engineering

GA CC9QT

UT WOS:000350706400024

DA 2018-05-03

ER

PT J

AU San, V

Sriv, T

Spoann, V

Var, S

Seak, S

AF San, Vibol

Sriv, Tharith

Spoann, Vin

Var, Sovannara

Seak, Sophat

TI Economic and environmental costs of rural household energy consumption

structures in Sameakki Meanchey district, Kampong Chhnang Province,

Cambodia

SO ENERGY

LA English

DT Article

DE Energy consumption; Economic cost; Environmental cost; Cambodia

ID FUELWOOD CONSUMPTION; CHINA; GASIFICATION; TECHNOLOGY; EMISSIONS;

PATTERNS; VILLAGES; STOVES; ASIA

AB Clean energy development in rural areas in Cambodia plays an important role in developing the economics of the poor. This study was conducted to explore rural household energy consumption in Sammeakki Meanchey district in Kampong Chhnang Province and its impact on the economy and environment using a quantitative model. The results show that most households consume a variety of non-conventional energy sources, including traditional biomass (fuelwood, plant waste and etc.), kerosene and even LPG (liquefied petroleum gas). Biomass is used for cooking and boiling water, while rechargeable batteries are exclusively used for lighting and running home devices. The monthly economic cost under the current structure with electricity at \$US33.23 is higher than the structure without electricity at \$US19.11. However, the monthly environmental cost of the structure with electricity is lower than the structure without electricity which the environmental cost is the highest. Monthly cash payment for energy structure with fossil fuel dominating is placed in the middle. Clear differences in the total cost, environmental cost, and economic cost for households are found among the four substitutable structures. Both the environmental and economic costs are lower when biogas is used, so this structure should be promoted throughout the rural areas in Cambodia. (C) 2012 Elsevier Ltd. All rights reserved.

C1 [San, Vibol; Spoann, Vin; Var, Sovannndara; Seak, Sophat] Royal Univ Phnom Penh, Dept Environm Sci, Phnom Penh, Cambodia.

[Sriv, Tharith] Royal Univ Phnom Penh, Dept Phys, Phnom Penh, Cambodia.

RP San, V (reprint author), Royal Univ Phnom Penh, Dept Environm Sci, Russian Federat Blvd, Tek Laak 2 Commune, PO 12157, Phnom Penh, Cambodia.

EM san.vibol@rupp.edu.kh

FU Economy and Environment Program for Southeast Asia (EEPSEA); Cambodian Development Resource Institute (CDRI)

FX The authors would like to express their gratitude to The Economy and Environment Program for Southeast Asia (EEPSEA) and Cambodian Development Resource Institute (CDRI) for providing financial support. We are also greatly indebted to Dr. David James and Dr. Herminia Francisco for their priceless support toward achieving the results that we were looking for. It should be noted that their professionals as well as moral assistance were the key for the successful accomplishment of this research work. The authors also would like to thank to Mr. Jonathan Gibson, Ms. Neang Im Chek and Mr. Sopheak Kong for their contribution and hard work in our survey.

CR Abe H, 2007, BIOMASS BIOENERG, V31, P656, DOI 10.1016/j.biombioe.2007.06.023

Akgiin O, 2011, THEORETICAL BIOENERG

Akgun O, 2012, ENRGY PROCED, V14, P1244, DOI 10.1016/j.egypro.2011.12.1083

Andreae MO, 2001, GLOBAL BIOGEOCHEMICA, V15, P4955

Arnold JEM, 2006, WORLD DEV, V34, P596, DOI 10.1016/j.worlddev.2005.08.008

Arnold M, 2003, 39 CIFOR

Batchelor SJ, 1997, RERIC INT ENERG J, V19, P45

CBD, 2001, VAL FOR EC

Chen L, 2006, ECOL ECON, V58, P407, DOI 10.1016/j.ecolecon.2005.07.018

Consulting Engineers Mekong, 2005, EV STUD BIOG PLANT D

Cambodian Research Centre for Development (CRCD), 2005, REN EN RES MAPS CAMB

Global Energy Network Institute (GEM), 2012, WIND EN POT CAMB

Hill Rebecca Lee, 2011, SOCIOECONOMIC PLANNI, V45

International Energy Agency, 2006, EN COOK DEV COUNTR W

IPCC, 2001, CLIMATE CHANGE 2001

IPCC, 2006, IPCC GUID NAT GREENH, VII

Janjai S, 2011, RENEW ENERG, V36, P1214, DOI 10.1016/j.renene.2010.09.023

Jin Y, 2006, SOC SCI MED, V62, P3161, DOI 10.1016/j.socscimed.2005.11.029

Kanagawa M, 2006, ECOLOGICAL EC, V58, P01

Kituyi E, 2001, BIOMASS BIOENERG, V20, P83, DOI 10.1016/S0961-9534(00)00072-6

Lenzen M., 1998, ENERG POLICY, V26, P496

Li GZ, 2009, RENEW ENERG, V34, P1438, DOI 10.1016/j.renene.2008.10.018

V Mansvelt ER, 2008, WOOD ENERGY BASELINE

Mansvelt R, 2006, CDM BASELINE STUDY F

Ministry of Environment, 2003, ASS GREENH GAS MIT T

The National Committee for Sub-National Democratic Development, 2010, COMM DAT ONL

National Institute of Statistics, 2008, STAT YB 2008 GEN POP  
 National Biodigester Programme (NBP), 2012, SPEC CRED BIOD  
 National Biodigester Programme (NBP), 2012, TECHN OV  
 National Biodigester Programme (NBP), 2012, BEN HOUS  
 Reddy MS, 2000, ATMOS ENVIRON, V34, P4511  
 Rural Electrification Fund (REF), 2011, RUR EL FUND KINGD CA  
 San V, 2012, ENERGY, V44, P335, DOI 10.1016/j.energy.2012.06.025  
 SMITH K., 1999, GREENHOUSE GASES SMA  
 Streets DG, 1998, ENERGY, V23, P1029, DOI 10.1016/S0360-5442(98)00033-4  
 Streets DG, 1999, ENERGY, V24, P841, DOI 10.1016/S0360-5442(99)00030-4  
 Top N, 2004, FOREST ECOL MANAG, V194, P369, DOI 10.1016/j.foreco.2004.02.028  
 Turker MF, 2001, ENER G CONVERS MANAGE, V42, P1215, DOI 10.1016/S0196-8904(00)00084-4  
 Turn SQ, 1997, J GEOPHYS RES-ATMOS, V102, P3683, DOI 10.1029/96JD02979  
 United Nations Development Program-UNDP, 2004, WORLD EN ASS OV 2004  
 UNDP, 2008, RES EN DEM RUR CAMB  
 Wang G. H., 1999, T CSAE, V15, P169  
 Wang Yu, 2010, Energy (Oxford), V35, P4473, DOI 10.1016/j.energy.2009.04.014  
 World Health Organization, 2008, GLOB BURD DIS 2004 U  
 World Bank, 2009, IMPR EN TECHN RUR CA  
 Yan S., 1997, CHINA ENV MANAGEMENT, V22, P2  
 Zhang J, 2000, ATMOS ENVIRON, V34, P4537, DOI 10.1016/S1352-2310(99)00450-1  
 Zhang PeiDong, 2005, Transactions of the Chinese Society of Agricultural Engineering, V21, P147  
 NR 48  
 TC 14  
 Z9 15  
 U1 0  
 U2 29  
 PU PERGAMON-ELSEVIER SCIENCE LTD  
 PI OXFORD  
 PA THE BOULEVARD, LANGFORD LANE, KIDLINGTON, OXFORD OX5 1GB, ENGLAND  
 SN 0360-5442  
 J9 ENERGY  
 JI Energy  
 PD DEC  
 PY 2012  
 VL 48  
 IS 1  
 BP 484  
 EP 491  
 DI 10.1016/j.energy.2012.10.017  
 PG 8  
 WC Thermodynamics; Energy & Fuels  
 SC Thermodynamics; Energy & Fuels  
 GA 069UE  
 UT WOS:000313461800055  
 DA 2018-05-03  
 ER  
  
 PT J  
 AU Tovar, MA  
 AF Tovar, Miguel A.  
 TI The structure of energy efficiency investment in the UK households and  
 its average monetary and environmental savings  
 SO ENERGY POLICY  
 LA English  
 DT Article  
 DE Energy efficiency adoption; Household space heating; Government policy  
 ID TAX CREDITS; DEMAND; ELECTRICITY; DISCOUNT; FUTURE; MODELS; SECTOR;



## POLICY

AB Socioeconomic and behavioural variables that influence the household's adoption of energy efficiency measures such as cavity and loft insulation and upgrades to the boiler are identified, contrary to previous literature. By extending Brechling and Smith's (1994) and Hassett and Metcalfs (1995) models, it is shown that the application of the Energy Act 2011, which contains provisions on the Green Deal, the new Energy Company Obligation (ECO) and the private rented sector, needs to follow a tailored strategy to reach the low adoption households identified by my model. Moreover, for the current adopters of the analysed measures, average monetary and environmental adoption benefits are estimated based on Parti and Parti's (1980) demand model. These estimates are smaller than their expected values showing an important energy efficiency gap in the sector. Particularly low cost measures can bring important savings that can help to meet the "pay as you save" rule (i.e., the Golden rule) of the new regulation. My model also shows that a poor state of dwelling repair can reduce the adoption benefits increasing the need of subsidies that will be financed through consumer's energy bills. However, this can increase the number of households in fuel poverty. (C) 2012 Elsevier Ltd. All rights reserved.

C1 Univ Essex, Dept Econ, Colchester CO4 3SQ, Essex, England.

RP Tovar, MA (reprint author), Univ Essex, Dept Econ, Wivenhoe Pk, Colchester CO4 3SQ, Essex, England.

EM matova@essex.ac.uk

CR Bertoldi P, 2010, ENERG POLICY, V38, P1455, DOI 10.1016/j.enpol.2009.11.027

BRADSHAW J, 1983, J ECON PSYCHOL, V3, P249, DOI 10.1016/0167-4870(83)90005-3

Braun FG, 2010, ENERG POLICY, V38, P5493, DOI 10.1016/j.enpol.2010.04.002

Brechling V, 1994, FISCAL STUDIES, V15, P44, DOI DOI 10.1111/J.1475-5890.1994.TB00196.X

Cramer J. S., 2003, LOGIT MODELS EC OTHE

Durbin J. A., 1984, ECONOMETRICA, V52, P345

Greene W., 2008, ECONOMETRIC ANAL

Guertler P., 2011, ENERG POLICY, V49, P91

HANEMANN WM, 1984, ECONOMETRICA, V52, P541, DOI 10.2307/1913464

Hargreaves C, 1998, ENERG ECON, V20, P173, DOI 10.1016/S0140-9883(97)00023-6

HASSETT KA, 1995, J PUBLIC ECON, V57, P201, DOI 10.1016/0047-2727(94)01452-T

HASSETT KA, 1993, ENERG POLICY, V21, P710, DOI 10.1016/0301-4215(93)90294-P

HAUSMAN JA, 1979, BELL J ECON, V10, P33, DOI 10.2307/3003318

Hong H.S., 2006, ENERG BUILDINGS, V38, P1171

Jamasb T., 2010, ENERGY SPENDING VULN

James P, 2012, ENVIRON DEV, V2, P6, DOI 10.1016/j.envdev.2012.02.002

Jeong J, 2011, ENERG POLICY, V39, P2679, DOI 10.1016/j.enpol.2011.02.037

Larsen BM, 2004, ENERG ECON, V26, P179, DOI 10.1016/j.eneco.2004.02.001

Liao HC, 2002, ENERG ECON, V24, P267, DOI 10.1016/S0140-9883(02)00014-2

Long E.J., 1993, ENERG ECON, V15, P232

MCDONALD R, 1986, Q J ECON, V101, P707, DOI 10.2307/1884175

Meier H, 2010, ENERG ECON, V32, P949, DOI 10.1016/j.eneco.2009.11.008

Palmer G, 2008, COLD POOR ANAL LINK

PARTI M, 1980, BELL J ECON, V11, P309, DOI 10.2307/3003415

Roberts S, 2008, ENERG POLICY, V36, P4471, DOI 10.1016/j.enpol.2008.09.025

Scott S, 1997, ENERG ECON, V19, P187, DOI 10.1016/S0140-9883(96)01000-6

Train K. E., 2003, DISCRETE CHOICE METH

Vaage K, 2000, ENERG ECON, V22, P649, DOI 10.1016/S0140-9883(00)00053-0

WALSH MJ, 1989, ENERG ECON, V11, P275, DOI 10.1016/0140-9883(89)90043-1

Wooldridge J. M., 2002, ECONOMETRIC ANAL CRO

NR 30

TC 14

Z9 14

U1 2

U2 37

PU ELSEVIER SCI LTD

PI OXFORD

PA THE BOULEVARD, LANGFORD LANE, KIDLINGTON, OXFORD OX5 1GB, OXON, ENGLAND

SN 0301-4215

J9 ENERG POLICY

J1 Energy Policy

PD NOV  
 PY 2012  
 VL 50  
 BP 723  
 EP 735  
 DI 10.1016/j.enpol.2012.08.019  
 PG 13  
 WC Economics; Energy & Fuels; Environmental Sciences; Environmental Studies  
 SC Business & Economics; Energy & Fuels; Environmental Sciences & Ecology  
 GA 028EO  
 UT WOS:000310405800068  
 DA 2018-05-03  
 ER

PT J  
 AU Chang, CC  
     Zhao, J  
     Zhu, N  
 AF Chang, Chenchen  
     Zhao, Jing  
     Zhu, Neng  
 TI Energy saving effect prediction and post evaluation of air-conditioning  
     system in public buildings  
 SO ENERGY AND BUILDINGS  
 LA English  
 DT Article  
 DE Artificial Neural Network; Refrigeration Operation Energy Efficiency  
     Ratio; Prediction evaluation; Post evaluation; Energy saving effect;  
     Retrofit air-conditioning system

ID ARTIFICIAL NEURAL-NETWORKS; CONSUMPTION

AB Accurate energy saving effect evaluation analysis of building energy efficiency retrofit is of benefit to obtain technology optimization and fast return of investment. According to the implement sequence, evaluation methods can be divided into post evaluation and prediction evaluation. The energy saving effect of an air-conditioning system retrofit project was analyzed by these two models respectively. The post evaluation model was built based on the spot test data and a parameter called as Refrigeration Operation Energy saving Effect Ratio (ROEER). The prediction evaluation model was built based on Back-Propagation Artificial Neural Network by the use of MATLAB Neural Network Toolbox. The comparison result between these two kinds of evaluation models match well with each other. These two models can be used to predict and evaluate energy saving effect of air-conditioning system retrofit to further improve the real energy saving effect of building energy efficiency retrofit. (C) 2011 Elsevier B.V. All rights reserved.

C1 [Chang, Chenchen; Zhao, Jing; Zhu, Neng] Tianjin Univ, Sch Environm Sci & Technol, Tianjin 300072, Peoples R China.

RP Zhao, J (reprint author), Tianjin Univ, Sch Environm Sci & Technol, Tianjin 300072, Peoples R China.

EM zhaojing@tju.edu.cn

CR Ding Y, 2010, ENERGBUILDINGS, V42, P955, DOI 10.1016/j.enbuild.2010.01.007

Ding Y, 2010, ENERGBUILDINGS, V42, P1902, DOI 10.1016/j.enbuild.2010.05.026

Escriva-Escriva G, 2010, ENERGBUILDINGS, V42, P2258, DOI 10.1016/j.enbuild.2010.07.023

\*GB, 2005, GB503652005

Gonzalez PA, 2005, ENERGBUILDINGS, V37, P595, DOI 10.1016/j.enbuild.2004.09.006

Guresen E, 2011, EXPERT SYST APPL, V38, P10389, DOI 10.1016/j.eswa.2011.02.068

Neto AH, 2008, ENERGBUILDINGS, V40, P2169, DOI 10.1016/j.enbuild.2008.06.013

Hippert HS, 2010, NEURAL NETWORKS, V23, P386, DOI 10.1016/j.neunet.2009.11.016

HU X, 1999, HV AC, V29, P1

Kalogirou SA, 1999, ENERGBUILDINGS, V40, P1073, DOI 10.1016/S0196-8904(99)00012-6

MIN XD, 2008, ANAL OPTIMIZATION ON

NI FJ, 2004, DEV BUILDING TECHNIQ, V31, P103

Gonzalez ABR, 2011, ENERGBUILDINGS, V43, P980, DOI 10.1016/j.enbuild.2010.12.023

Xie Z.H, 2000, ENERGY TECHNOLOGY, V21, P158

Yang J, 2005, ENERGBUILDINGS, V37, P1250, DOI 10.1016/j.enbuild.2005.02.005  
 Zhang YD, 2009, EXPERT SYST APPL, V36, P8849, DOI 10.1016/j.eswa.2008.11.028  
 ZHAO J, 2009, TECHNOLOGICAL SYSTEM  
 Zhao J, 2009, ENERGPOLICY, V37, P2053, DOI 10.1016/j.enpol.2008.11.035  
 ZHAO RY, 2004, AIR CONDITIONING

NR 19

TC 14

Z9 15

U1 4

U2 23

PU ELSEVIER SCIENCE SA

PI LAUSANNE

PA PO BOX 564, 1001 LAUSANNE, SWITZERLAND

SN 0378-7788

J9 ENERGBUILDINGS

JI Energy Build.

PD NOV

PY 2011

VL 43

IS 11

BP 3243

EP 3249

DI 10.1016/j.enbuild.2011.08.025

PG 7

WC Construction & Building Technology; Energy & Fuels; Engineering, Civil

SC Construction & Building Technology; Energy & Fuels; Engineering

GA 841YH

UT WOS:000296550600034

DA 2018-05-03

ER

PT J

AU Ma, J

Cheng, JCP

AF Ma, Jun

Cheng, Jack C. P.

TI Estimation of the building energy use intensity in the urban scale by  
 integrating GIS and big data technology

SO APPLIED ENERGY

LA English

DT Article

DE Artificial Neural Network (ANN); Big Data; Energy use intensity (EUI);

Feature selection; Geographic information system (GIS); Support Vector

Regression (SVR)

ID RIDGE-REGRESSION; NEURAL-NETWORKS; CLIMATE-CHANGE; LOW-INCOME;

CONSUMPTION; PREDICTION; SELECTION; OPTIMIZATION; IMPACT; REGULARIZATION

AB Buildings are the major source of energy consumption in urban areas. Accurate modeling and forecasting of the building energy use intensity (EUI) in the urban scale have many important applications, such as energy benchmarking and urban energy infrastructure planning. The use of Big Data technology is expected to have the capability of integrating a large number of predictors and giving an accurate prediction of the energy use intensity of buildings in the urban scale. However, past research has often used Big Data technology in estimating energy consumption of a single building rather than the urban scale, due to several challenges such as data collection and feature engineering. This paper therefore proposes a geographic information system integrated data mining methodology framework for estimating the building EUI in the urban scale, including preprocessing, feature selection, and algorithm optimization. Based on 216 prepared features, a case study on estimating the site EUI of 3640 multi-family residential buildings in New York City, was tested and validated using the proposed methodology framework. A comparative study on the feature selection strategies and the commonly used regression algorithms was

also included in the case study. The results show that the framework was able to help produce lower estimation errors than previous research, and the model built by the Support Vector Regression algorithm on the features selected by Elastic Net has the least cross-validation mean squared error. (C) 2016 Elsevier Ltd. All rights reserved.

C1 [Ma, Jun; Cheng, Jack C. P.] Hong Kong Univ Sci & Technol, Dept Civil & Environm Engn, Kowloon, Hong Kong, Peoples R China.

RP Cheng, JCP (reprint author), Hong Kong Univ Sci & Technol, Dept Civil & Environm Engn, Kowloon, Hong Kong, Peoples R China.

EM jmaae@ust.hk; cejcheng@ust.hk

RI MA, Jun/F-7385-2017

OI MA, Jun/0000-0001-9441-0083

FU Research Grants Council of the Hong Kong Special Administrative Region, China [611513]

FX The authors would like to acknowledge the support by the Research Grants Council of the Hong Kong Special Administrative Region, China (Project No. 611513).

CR Amiri SS, 2015, ENERGBUILDINGS, V109, P209, DOI 10.1016/j.enbuild.2015.09.073

Bergstra J, 2012, J MACH LEARN RES, V13, P281

Bradshaw JL, 2014, ENERGBUILDINGS, V69, P535, DOI 10.1016/j.enbuild.2013.11.035

Carta JA, 2015, APPL ENERGBUILDINGS, V158, P490, DOI 10.1016/j.apenergy.2015.08.102

Cheng JCP, 2015, BUILD ENVIRON, V93, P349, DOI 10.1016/j.buildenv.2015.07.019

Cheng JCP, 2015, BUILD ENVIRON, V90, P232, DOI 10.1016/j.buildenv.2014.11.029

City of New York D of CP, 2015, PLUTO AND MAPPLUTO

City of New York MO of S, 2015, BENCHMARKING DATA DI

De Gennaro M, 2014, APPL ENERGBUILDINGS, V124, P94, DOI 10.1016/j.apenergy.2014.03.003

Douak F, 2013, APPL ENERGBUILDINGS, V103, P328, DOI 10.1016/j.apenergy.2012.09.055

Friedman J, 2009, GLMNET LASSO ELASTIC, P1

Gaigne C, 2012, URBAN ECOL, V72, P123

Gruber M, 2015, APPL ENERGBUILDINGS, V154, P934, DOI 10.1016/j.apenergy.2015.05.075

Guyon I, 2003, Journal of Machine Learning Research, V3, P1157, DOI 10.1162/153244303322753616

Hall M. A., 1999, CORRELATION BASED FE

Han J, 2012, MOR KAUF D, P1

Hastie T., 2009, ELEMENTS STAT LEARNI

Hastie T, GLMNET VIGNETTE

Haykin S. O., 2009, NEURAL NETWORKS LEARNI, V3

HOERL AE, 1970, TECHNOMETRICS, V12, P55

Howard B, 2012, ENERGBUILDINGS, V45, P141, DOI 10.1016/j.enbuild.2011.10.061

Hsu D, 2015, ENERGY, V83, P144, DOI 10.1016/j.energy.2015.02.008

Huang KT, 2016, APPL ENERGBUILDINGS, V184, P1230, DOI 10.1016/j.apenergy.2015.11.008

Huebner GM, 2015, APPL ENERGBUILDINGS, V159, P589, DOI 10.1016/j.apenergy.2015.09.028

Jain RK, 2014, APPL ENERGBUILDINGS, V123, P168, DOI 10.1016/j.apenergy.2014.02.057

Koo C, 2015, APPL ENERGBUILDINGS, V154, P254, DOI 10.1016/j.apenergy.2015.05.003

Kusiak A, 2012, ENERGY, V42, P241, DOI 10.1016/j.energy.2012.03.063

Lal T, 2006, EMBEDDED METHODS FEA, P137

Liu JY, 2015, ENERGBUILDINGS, V86, P449, DOI 10.1016/j.enbuild.2014.10.062

Long H, 2014, APPL ENERGBUILDINGS, V126, P29, DOI 10.1016/j.apenergy.2014.03.084

Majidpour M, 2016, APPL ENERGBUILDINGS, V163, P134, DOI 10.1016/j.apenergy.2015.10.184

Martins TAL, 2014, ENERGBUILDINGS, V76, P43, DOI 10.1016/j.enbuild.2014.02.056

No OMB, 2005, NO OMB RESIDENTIAL E

Norman J, 2006, J URBAN PLAN D-ASCE, V132, P10, DOI 10.1061/(ASCE)0733-9488(2006)132:1(10)

Patil MA, 2015, APPL ENERGBUILDINGS, V159, P285, DOI 10.1016/j.apenergy.2015.08.119

Petersen S, 2010, ENERGBUILDINGS, V42, P1113, DOI 10.1016/j.enbuild.2010.02.002

Rakotomamonjy A., 2003, Journal of Machine Learning Research, V3, P1357, DOI 10.1162/153244303322753706

Ripley B. D, 1996, PATTERN RECOGNITION

Roy DP, 2014, REMOTE SENS ENVIRON, V145, P154, DOI 10.1016/j.rse.2014.02.001

Sanchez-Garcia S, 2015, APPL ENERGBUILDINGS, V144, P193, DOI 10.1016/j.apenergy.2015.01.099

Santamouris M, 2014, ENERGBUILDINGS, V70, P61, DOI 10.1016/j.enbuild.2013.11.074

Sarkar C., 2014, HLTH CITIES PUBLIC H  
 Schmidhuber J, 2015, NEURAL NETWORKS, V61, P85, DOI 10.1016/j.neunet.2014.09.003  
 Shammin MR, 2010, ECOL ECON, V69, P2363, DOI 10.1016/j.ecolecon.2010.07.003  
 Siami-Irdemoosa E, 2015, APPL ENERG, V151, P77, DOI 10.1016/j.apenergy.2015.04.064  
 Smola A., 1997, ADV NEURAL INFORM PR, V9, P155  
 Tibshirani R, 1996, J ROY STAT SOC B MET, V58, P267  
 Vartholomaios A, 2015, ENERG BUILDINGS, V99, P303, DOI 10.1016/j.enbuild.2015.04.046  
 Venables W. N., 2013, MODERN APPL STAT S P  
 Virote J, 2012, ENERG BUILDINGS, V53, P183, DOI 10.1016/j.enbuild.2012.06.001  
 [Anonymous], 2015, REGR AN  
 [Anonymous], 2015, GEOGR INF SYST  
 Xu JP, 2015, APPL ENERG, V159, P520, DOI 10.1016/j.apenergy.2015.09.008  
 Ye H, 2015, ENERG BUILDINGS, V93, P90, DOI 10.1016/j.enbuild.2015.02.011  
 Yuan J, 2015, ENERG BUILDINGS, V109, P1, DOI 10.1016/j.enbuild.2015.10.012  
 Yuce B, 2016, ENERG BUILDINGS, V111, P311, DOI 10.1016/j.enbuild.2015.11.017  
 Zhang H.H., 2008, J STAT, V2, P149  
 Zhou YY, 2014, APPL ENERG, V113, P1077, DOI 10.1016/j.apenergy.2013.08.034  
 Zou H, 2005, J ROY STAT SOC B, V67, P301, DOI 10.1111/j.1467-9868.2005.00503.x

NR 59

TC 13

Z9 13

U1 7

U2 33

PU ELSEVIER SCI LTD

PI OXFORD

PA THE BOULEVARD, LANGFORD LANE, KIDLINGTON, OXFORD OX5 1GB, OXON, ENGLAND

SN 0306-2619

EI 1872-9118

J9 APPL ENERG

JI Appl. Energy

PD DEC 1

PY 2016

VL 183

BP 182

EP 192

DI 10.1016/j.apenergy.2016.08.079

PG 11

WC Energy &amp; Fuels; Engineering, Chemical

SC Energy &amp; Fuels; Engineering

GA EH6PY

UT WOS:000391897600015

DA 2018-05-03

ER

PT J

AU Mills, B

Schleich, J

AF Mills, Bradford

Schleich, Joachim

TI Household transitions to energy efficient lighting

SO ENERGY ECONOMICS

LA English

DT Article

DE Energy-efficient lamps; Household adoption; Rebound effect

ID SELECTION BIAS; CONSERVATION; CONSUMPTION; ATTITUDES; ADOPTION

AB New energy efficient lighting technologies can significantly reduce household electricity consumption, but adoption has been slow. A unique dataset of German households is used in this paper to examine the factors associated with the replacement of old incandescent lamps (Is) with new energy efficient compact

fluorescent lamps (CFLs) and light emitting diodes (LEDs). The 'rebound' effect of increased lamp luminosity in the transition to energy efficient bulbs is analyzed jointly with the replacement decision to account for household self-selection in bulb-type choice. Results indicate that the EU ban on CFLs accelerated the pace of transition to CFLs and LEDs, while storage of bulbs significantly dampened the speed of the transition. Higher lighting needs and bulb attributes like energy efficiency, environmental friendliness, and durability spur CFL replacement with CFLs or LEDs. Electricity gains from new energy efficient lighting are mitigated by 23% and 47% increases in luminosity for CFL and LED replacements, respectively. Model results suggest that taking the replacement bulb from storage and higher levels of education dampen the magnitude of these luminosity rebounds in CFL to CFL transitions. (c) 2014 Elsevier B.V. All rights reserved.

C1 [Mills, Bradford; Schleich, Joachim] Virginia Polytech Inst & State Univ, Blacksburg, VA 24061 USA.  
 [Schleich, Joachim] Fraunhofer Inst Syst & Innovat Res, Karlsruhe, Germany.  
 [Schleich, Joachim] Grenoble Ecole Management, Grenoble, France.

RP Mills, B (reprint author), 205-A Hutcheson Hall, Blacksburg, VA 24061 USA.  
 EM bfmills@vt.edu

OI Schleich, Joachim/0000-0001-6079-7240

CR Allcott H, 2012, 17977 NAT BUR EC RES  
 Bertoldi P, 2012, ENERGY EFFICIENCY ST  
 Borenstein S, 2013, 19044 NAT BUR EC RES  
 Bourguignon F, 2007, J ECON SURV, V21, P174, DOI 10.1111/j.1467-6419.2007.00503.x  
 BROOKES L, 1990, ENER POLICY, V18, P199, DOI 10.1016/0301-4215(90)90145-T  
 Chitnis M, 2013, ENER POLICY, V55, P234, DOI 10.1016/j.enpol.2012.12.008  
 CLASP, 2013, EST POT ADD EN SAV U  
 Fonseca P, 2008, RESIDENTIAL MONITORI  
 de Almeida A., 2013, ACCELERATING DEPLOYM  
 Di Maria C, 2010, SCOT J POLIT ECON, V57, P48, DOI 10.1111/j.1467-9485.2009.00506.x  
 DUBIN JA, 1984, ECONOMETRICA, V52, P345, DOI 10.2307/1911493  
 European Commission, 2011, COM2011889 EUR COMM  
 [Anonymous], 2011, EUR LED QUAL CHART  
 Fouquet R, 2006, ENER J, V27, P139  
 Fouquet R, 2012, ECON ENERGY ENV POL, V1, P83, DOI 10.5547/2160-5890.1.1.8  
 Frondel M., 2008, ENERGY J, V29, P154, DOI DOI 10.5547/ISSN0195-6574-EJ-V0129-N04-7  
 Frondel M, 2012, ENER ECON, V34, P461, DOI 10.1016/j.eneco.2011.10.016  
 Frondel M, 2011, ENER POLICY, V39, P3177, DOI 10.1016/j.enpol.2011.02.072  
 Greening LA, 2000, ENER POLICY, V28, P389  
 HECKMAN JJ, 1979, ECONOMETRICA, V47, P153, DOI 10.2307/1912352  
 IEA, 2010, PHASE OUT ILS IMPL I  
 Kanter J, 2009, NY TIMES  
 Khazzoom J. D., 1989, ENERGY J, V10, P157  
 Khazzoom J., 1987, ENERGY J, V8, P85  
 Khazzoom J. D, 1980, ENERGY J, V1, P21  
 Kumar A., 2003, ENER POLICY, V31, P59  
 LEE LF, 1983, ECONOMETRICA, V51, P507, DOI 10.2307/1912003  
 Madlener R, 2009, ENERGY, V34, P370, DOI 10.1016/j.energy.2008.10.011  
 McKinsey & Company, 2012, LIGHT WAY PERSP GLOB  
 Mills B, 2012, ENER POLICY, V49, P616, DOI 10.1016/j.enpol.2012.07.008  
 Mills BF, 2010, RESOUR ENERGY ECON, V32, P363, DOI 10.1016/j.reseneeco.2009.10.002  
 Rogers E., 2003, DIFFUSION INNOVATION  
 Schleich J, 2014, ENER POLICY, V72, P35, DOI 10.1016/j.enpol.2014.04.028  
 SCHULTZ TW, 1975, J ECON LIT, V13, P827  
 Scott S, 1997, ENER ECON, V19, P187, DOI 10.1016/S0140-9883(96)01000-6  
 SIMON HA, 1959, AM ECON REV, V49, P253  
 Sorrell S., 2007, REBOUND EFFECT ASSES  
 Spiegel Online International, 2009, GETT EU BAN GERM HOA  
 van den Bergh JCM, 2011, ENVIRON RESOUR ECON, V48, P43, DOI 10.1007/s10640-010-9396-z  
 VITO, 2009, PREP STUD EC REQ EUP

NR 40

TC 13

Z9 13

U1 3  
 U2 27  
 PU ELSEVIER SCIENCE BV  
 PI AMSTERDAM  
 PA PO BOX 211, 1000 AE AMSTERDAM, NETHERLANDS  
 SN 0140-9883  
 EI 1873-6181  
 J9 ENERG ECON  
 JI Energy Econ.  
 PD NOV  
 PY 2014  
 VL 46  
 SI SI  
 BP 151  
 EP 160  
 DI 10.1016/j.eneco.2014.08.022  
 PG 10  
 WC Economics  
 SC Business & Economics  
 GA AY4YB  
 UT WOS:000347579800014  
 DA 2018-05-03  
 ER

PT J  
 AU Deng, SH  
 Zhang, J  
 Shen, F  
 Guo, H  
 Li, Y  
 Xiao, H

AF Deng, S. H.  
 Zhang, J.  
 Shen, F.  
 Guo, H.  
 Li, Y. -w.  
 Xiao, H.

TI The Relationship Between Industry Structure, Household-number and Energy Consumption in China

SO ENERGY SOURCES PART B-ECONOMICS PLANNING AND POLICY

LA English

DT Article

DE energy policy implication; improved decomposing methodology; industry structure; modeling; number of household

ID ESTIMATORS

AB This article investigates the empirical relationship between energy consumption, industry structure, and household-number. An empirical model with energy consumption, structure and scale of industry, and household-number was built. Using ridge regression analysis and observed data from 1985 to 2007 in China, we examine the relationship between each part of energy consumption and the corresponding coefficients, including gross domestic production (GDP) in the secondary sector (IGDP), in primary and tertiary industries (PTGDP) and number of denizens (NDC). The results show that changing the independent variables (diminishing IGDP/GDP, NDC/GDP, IGDP, PTGDP, and NDC or increasing PTGDP/GDP) or their corresponding coefficients can both lower energy consumption, theoretically. But, in fact, it is not suitable to decrease total energy consumption by changing the independent variables for China. In order to diminish the parameters, the Chinese government must continue to promote energy efficiency by introducing advanced technologies and implementing the policy of saving energy.

C1 [Deng, S. H.; Shen, F.; Li, Y. -w.; Xiao, H.] Sichuan Agr Univ, Prov Key Lab Agr Environm Engr, Chengdu 611130, Sichuan, Peoples R China.

[Deng, S. H.; Guo, H.] Sichuan Agr Univ, Econ & Business Coll, Yaan, Sichuan, Peoples R China.  
 [Zhang, J.] Sichuan Univ, Coll Architecture & Environm, Chengdu 610064, Peoples R China.  
 [Zhang, J.] Michigan State Univ, Dept Civil & Environm Engrn, E Lansing, MI 48824 USA.  
 RP Deng, SH (reprint author), Sichuan Agr Univ, Prov Key Lab Agr Environm Engrn, 3th Teaching Bldg,  
 Chengdu 611130, Sichuan, Peoples R China.  
 EM shdeng8888@163.com  
 OI Shen, Fei/0000-0001-5693-170X  
 CR Cao SX, 2010, J POLICY MODEL, V32, P159, DOI 10.1016/j.jpolmod.2009.08.002  
 Crompton P, 2005, ENERG ECON, V27, P195, DOI 10.1016/j.eneco.2004.10.006  
 Deng WS, 2001, J STAT PLAN INFER, V93, P225, DOI 10.1016/S0378-3758(00)00161-0  
 DICKEY DA, 1979, J AM STAT ASSOC, V74, P427, DOI 10.2307/2286348  
 Fan P, 2006, TECHNOL SOC, V28, P303, DOI 10.1016/j.techsoc.2006.06.002  
 Grapentine A, 1997, MARK RES, V9, P11  
 Guo ZC, 2010, ENERGY, V35, P4356, DOI 10.1016/j.energy.2009.04.008  
 Hoerl A. E., 1959, CHEM ENG PROGR, V55, P69  
 Hoerl A. E., 1962, CHEM ENG PROGR, V58, P54  
 [??? JIA Shun-ping], 2010, [????????????], Journal of Transporation Systems Engineering & Information  
 Technology], V10, P22  
 Li ZS, 2007, ENERG POLICY, V35, P4121, DOI 10.1016/j.enpol.2007.02.006  
 Liang DP, 2008, ENERG POLICY, V36, P268, DOI 10.1016/j.enpol.2007.09.014  
 Liang QM, 2007, ENERG POLICY, V35, P1685, DOI 10.1016/j.enpol.2006.04.018  
 Ma C, 2008, ENERG ECON, V30, P1037, DOI 10.1016/j.eneco.2007.05.005  
 MASON CH, 1991, J MARKETING RES, V28, P268, DOI 10.2307/3172863  
 Verbeke T, 2006, ENVIRON MODELL SOFTW, V21, P1447, DOI 10.1016/j.envsoft.2005.07.007  
 Yang M, 2008, ENERG POLICY, V36, P561, DOI 10.1016/j.enpol.2007.09.032  
 Yu XJ, 2010, ENERG POLICY, V38, P2161, DOI 10.1016/j.enpol.2009.06.004  
 Yuan C. Q., 2010, ENERG POLICY, V37, P2842  
 Zhang LX, 2009, RENEW ENERG, V34, P2813, DOI 10.1016/j.renene.2009.04.006  
 NR 20  
 TC 13  
 Z9 13  
 U1 0  
 U2 183  
 PU TAYLOR & FRANCIS INC  
 PI PHILADELPHIA  
 PA 325 CHESTNUT ST, SUITE 800, PHILADELPHIA, PA 19106 USA  
 SN 1556-7249  
 EI 1556-7257  
 J9 ENERG SOURCE PART B  
 JI Energy Sources Part B  
 PD OCT 2  
 PY 2014  
 VL 9  
 IS 4  
 BP 325  
 EP 333  
 DI 10.1080/15567249.2010.533330  
 PG 9  
 WC Energy & Fuels  
 SC Energy & Fuels  
 GA 240BH  
 UT WOS:000326069200002  
 DA 2018-05-03  
 ER  
 PT J  
 AU Joachain, H  
 Klopfert, F



AF Joachain, Helene

Klopfert, Frederic

TI Smarter than metering? Coupling smart meters and complementary currencies to reinforce the motivation of households for energy savings

SO ECOLOGICAL ECONOMICS

LA English

DT Article

DE Energy saving; Motivation; Complementary currencies; Smart metering; Innovative policy instruments; Households; Energy consumption

ID SELF-DETERMINED MOTIVATION; BEHAVIOR; INFORMATION; COMMUNITY; FEEDBACK; RISKS

AB A crucial argument in the debate around smart meter deployment in the EU is the potential for households to save energy. One strand of research in this field has investigated the effects on household energy consumption of the feed-back provided by smart meters. However, another aspect that deserves attention is the motivation for households to use the feed-back to save energy. This paper explores how the emerging trend of using complementary currencies for sustainability policies could translate into new interventions adapted to the smart meter deployment and capable of promoting more autonomous forms of motivation compared to interventions using official currencies. Three systems designs (rewarding, regulatory and hybrid) are presented and discussed within the framework of self-determination theory. Because the rewarding system S1 can contribute positively people's basic needs for autonomy, competence and relatedness, it could lead to more autonomous forms of motivation. The conclusions regarding the regulatory system S2 are less clear, although the hybrid variant S3 that integrates mechanisms from the rewarding system into the regulatory system could be perceived as more consonant with people's basic need for autonomy. (C) 2014 Elsevier B.V. All rights reserved.

C1 [Joachain, Helene] Univ Libre Bruxelles, Ctr European Res Microfinance CERMi, Solvay Brussels Sch Econ & Management SBS EM, B-1050 Brussels, Belgium.

[Klopfert, Frederic] Univ Libre Bruxelles, Brussels Sch Engr EPB, Bio Electro & Mech Syst BEAMS Energy, B-1050 Brussels, Belgium.

RP Joachain, H (reprint author), Univ Libre Bruxelles, Ctr European Res Microfinance CERMi, Solvay Brussels Sch Econ & Management SBS EM, 42 Ave FD Roosevelt CP 114-03, B-1050 Brussels, Belgium.

EM helene.joachain@ulb.ac.be

FU Science for a Sustainable Development Programme of the Belgian Science Policy [INESPO SD/EN/09]

FX Part of this research was carried out in the context of the "Innovative Instruments for Energy Saving Policies (INESPO) project" financed by the Science for a Sustainable Development Programme of the Belgian Science Policy under grant INESPO SD/EN/09.

CR Abrahamse W, 2005, J ENVIRON PSYCHOL, V25, P273, DOI 10.1016/j.jenvp.2005.08.002

Abrahamse W, 2007, J ENVIRON PSYCHOL, V27, P265, DOI 10.1016/j.jenvp.2007.08.002

Abrahamse W, 2011, HUM ECOL REV, V18, P30

AJZEN I, 1991, ORGAN BEHAV HUM DEC, V50, P179, DOI 10.1016/0749-5978(91)90020-T

Anderson W., 2009, REPORT ENERGY SAVING

Bamberg S, 2003, ENVIRON BEHAV, V35, P264, DOI 10.1177/0013916502250134

Blanc J., 2011, INT J COMMUNITY CURR, V15, P4

CER, 2011, SMART MET PROJ PHAS

Darby Sarah, 2006, REV DEFRA LIT METERI, V486, P2006

Deci EL, 2000, PSYCHOL INQ, V11, P227, DOI 10.1207/S15327965PLI1104\_01

Deci EL, 1985, INTRINSIC MOTIVATION

Demoulin NTM, 2008, J RETAIL CONSUM SERV, V15, P386, DOI 10.1016/j.jretconser.2007.10.001

EEA, 2013, ACH EN EFF BEH CHANG

Ehrhardt-Martinez Karen, 2010, ADV MET IN RES FEEDB

Fawcett T, 2010, ENERG POLICY, V38, P6868, DOI 10.1016/j.enpol.2010.07.001

Fischer C., 2007, INFLUENCING ELECT CO

Fischer C, 2008, ENERG EFFIC, V1, P79, DOI 10.1007/s12053-008-9009-7

Fleming D., 2011, TEQS TRADABLE ENERGY

Hagger M. S., 2007, PSYCHOL MOTIVATION, P83

Joachain H., 2012, IJCCR, V16, P156

Joachain H., 2013, 13008 CEB, V13-008

Joachain H., 2009, REPORT BRUSSELS ENV  
 JRC European Commission, 2013, SMART GRID PROJ EUR  
 KAGAN J, 1972, J PERS SOC PSYCHOL, V22, P51, DOI 10.1037/h0032356  
 Kennedy M., 2008, MONNAIES REGIONALES  
 Klopfert F, 2011, EMPOWERING CONSUMERS  
 Koestner R, 2001, J APPL SOC PSYCHOL, V31, P2545, DOI 10.1111/j.1559-1816.2001.tb00190.x  
 Lavergne KJ, 2010, J ENVIRON PSYCHOL, V30, P169, DOI 10.1016/j.jenvp.2009.11.002  
 Bond Beter Leefmilieu, 2006, EINDEVALUATIE PILOOT, V5  
 Lietaer B., 2012, MONEY SUSTAINABILITY  
 Lietaer B, 2010, J FUTURES STUD, V14, P89  
 MCMILLAN DW, 1986, J COMMUNITY PSYCHOL, V14, P6, DOI 10.1002/1520-6629(198601)14:1<6::AID-JCOP2290140103>3.0.CO;2-I  
 Moller AC, 2006, J PUBLIC POLICY MARK, V25, P104, DOI 10.1509/jppm.25.1.104  
 Ofgem, 2011, EN DEM RES PROJ FIN  
 Osbaldiston R, 2003, J ENVIRON PSYCHOL, V23, P349, DOI 10.1016/S0272-4944(03)00035-5  
 Pelletier LG, 1998, J APPL SOC PSYCHOL, V28, P437, DOI 10.1111/j.1559-1816.1998.tb01714.x  
 Ryan RM, 2000, CONTEMP EDUC PSYCHOL, V25, P54, DOI 10.1006/ceps.1999.1020  
 Schleich Joachim, 2011, SMART METERING GERMA  
 Seguin C, 1999, J APPL SOC PSYCHOL, V29, P1582, DOI 10.1111/j.1559-1816.1999.tb02043.x  
 Seyfang G, 2013, ECOL ECON, V86, P65, DOI 10.1016/j.ecolecon.2012.11.003  
 Sheldon K. M., 2011, ECOPSYCHOLOGY, V3, P97, DOI DOI 10.1089/EC0.2010.0078  
 Starkey R, 2012, ECOL ECON, V73, P19, DOI 10.1016/j.ecolecon.2011.09.018  
 Starkey R, 2012, ECOL ECON, V73, P7, DOI 10.1016/j.ecolecon.2011.09.022  
 Vansteenkiste M, 2004, J PERS SOC PSYCHOL, V87, P246, DOI 10.1037/0022-3514.87.2.246  
 Warde A, 2005, J CONSUM CULT, V5, P131, DOI DOI 10.1177/1469540505053090  
 Webb D, 2013, J ENVIRON PSYCHOL, V35, P59, DOI 10.1016/j.jenvp.2013.04.003  
 NR 46  
 TC 13  
 Z9 13  
 U1 0  
 U2 26  
 PU ELSEVIER SCIENCE BV  
 PI AMSTERDAM  
 PA PO BOX 211, 1000 AE AMSTERDAM, NETHERLANDS  
 SN 0921-8009  
 EI 1873-6106  
 J9 ECOL ECON  
 JI Ecol. Econ.  
 PD SEP  
 PY 2014  
 VL 105  
 BP 89  
 EP 96  
 DI 10.1016/j.ecolecon.2014.05.017  
 PG 8  
 WC Ecology; Economics; Environmental Sciences; Environmental Studies  
 SC Environmental Sciences & Ecology; Business & Economics  
 GA AP7QU  
 UT WOS:000342272600010  
 DA 2018-05-03  
 ER  
  
 PT J  
 AU Hoicka, CE  
     Parker, P  
     Andrey, J  
 AF Hoicka, Christina E.  
     Parker, Paul

Andrey, Jean

TI Residential energy efficiency retrofits: How program design affects participation and outcomes

SO ENERGY POLICY

LA English

DT Article

DE Residential energy efficiency evaluation; Information and incentives; Program design and participation

ID COMMUNITY ENERGY; CONSERVATION; INNOVATIONS; BEHAVIOR; MANAGEMENT; CANADA

AB Better methods of characterizing and addressing heterogeneity in preferences and decision making are needed to stimulate reductions in household greenhouse gas emissions. Four residential energy efficiency programs were delivered consecutively in the Region of Waterloo, Canada, between 1999 and 2011, and each offered a unique combination of information, financial reward structure, and price. A natural quasi-experimental intervention design was employed to assess differences in outcomes across these program structures. Participation at the initial (evaluation by an energy advisor) and follow-up (verification of retrofit) stages, and the material characteristics (e.g., energy performance) were measured and compared between the groups of houses included in each program at each stage. The programs appealed to people with different types of material concerns; each phase of the program was associated with houses with a different mix of material characteristics and depths of recommended and achieved changes. While a performance-based reward attracted fewer houses at each stage than a larger list-based reward, older houses with poorer energy performance were included at each stage. The findings support experimentation with program designs to target sub-populations of housing stock; future program designs should experiment more carefully and with larger performance-based rewards and test parallels with potential carbon market structures. (C) 2013 Elsevier Ltd. All rights reserved.

C1 [Hoicka, Christina E.] York Univ, Fac Environm Studies, N York, ON M3J 1P3, Canada.

[Parker, Paul; Andrey, Jean] Univ Waterloo, Dept Geog & Environm Management, Waterloo, ON N2L 3G1, Canada.

RP Hoicka, CE (reprint author), York Univ, Fac Environm Studies, N York, ON M3J 1P3, Canada.

EM cehoicka@yorku.ca

FU Social Science and Humanities Research Council of Canada; Ontario

Graduate Scholarship; Interdisciplinary Centre on Climate Change; University of Waterloo

FX The authors thank the Residential Energy Efficiency Project staff and partners who supported, delivered and managed the programs at the local level. In particular, Mary Jane Patterson and Brendan Schaeffer provided assistance in acquiring the dataset. The authors also thank Jamie Baxter and the anonymous reviewers for their insightful comments. The Social Science and Humanities Research Council of Canada, Ontario Graduate Scholarship, the Interdisciplinary Centre on Climate Change and the University of Waterloo provided financial support. Any errors or omissions remain the responsibility of the authors.

CR Abrahamse W, 2005, J ENVIRON PSYCHOL, V25, P273, DOI 10.1016/j.jenvp.2005.08.002

Berry D., 2010, ELECT J, V23, P65

Bird T., 2006, ALTERNATIVES, V32, P7

Campbell D. T., 1963, EXPT QUASIEXPERIMENT

CRAIG CS, 1978, J CONSUM RES, V5, P82, DOI 10.1086/208718

DEYOUNG R, 1993, ENVIRON BEHAV, V25, P485, DOI 10.1177/0013916593253003

Dusyk N, 2009, ENERG EFFIC, V2, P387, DOI 10.1007/s12053-009-9048-8

Egmond C, 2006, ENERG POLICY, V34, P4042, DOI 10.1016/j.enpol.2005.10.001

Egmond C, 2006, ENERG POLICY, V34, P3464, DOI 10.1016/j.enpol.2005.07.017

Egmond C, 2006, ENERG POLICY, V34, P3115, DOI 10.1016/j.enpol.2005.06.002

Environment Canada, 2010, EMM FACT CAN GHG INV

Environment Canada, 2010, EL INT TABL

Feilzer MY, 2010, J MIX METHOD RES, V4, P6, DOI 10.1177/1558689809349691

Fuller M.C., 2010, DRIVING DEMAND HOME, P3960

Gantessa SF, 2013, ENERG BUILDINGS, V57, P155, DOI 10.1016/j.enbuild.2012.11.006

HARTMAN RS, 1988, REV ECON STAT, V70, P448, DOI 10.2307/1926783

HIRST E, 1981, ENERGY, V6, P621, DOI 10.1016/0360-5442(81)90017-7  
 Hoffman SM, 2010, ENER POLICY, V38, P7567, DOI 10.1016/j.enpol.2009.06.054  
 International Energy Agency, 2008, WORLDW TRENDS EN US  
 Jaccard M, 1997, ENER POLICY, V25, P1065, DOI 10.1016/S0301-4215(97)00091-8  
 Jackson T., 2005, MOTIVATING SUSTAINAB  
 Kennedy R.D., 2001, ENVIRONMENTS, V28, P57  
 Lebel L, 2008, ANNU REV ENV RESOUR, V33, P241, DOI 10.1146/annurev.environ.33.022007.145734  
 Maruejols L, 2009, GEN HOME RETROFIT PR  
 Metz B., 2007, MITIGATION CLIMATE C  
 OECD - Organisation for Economic Co-operation and Development, 2011, OECD STUD ENV POL HO  
 Office of Energy Efficiency, 2012, DAT DEADL ECOENERGY  
 Office of Energy Efficiency, 2005, ENERGUIDE NEW HOUS A  
 Office of Energy Efficiency, 2006, STAT EN EFF CAN REP  
 Office of Energy Efficiency, 2012, RES GHG EM EN SOURC  
 Ontario Ministry of Energy, 2007, ONT HOM EN SAV PROGR  
 Ontario Ministry of Municipal Affairs and Housing, 2012, 2012 REQ NEW CONSTR  
 Owens S., 1986, ENERGY PLANNING URBA  
 Parker P, 2003, CAN GEOGR-GEOGR CAN, V47, P169, DOI 10.1111/1541-0064.00006  
 Parker P., 2001, ENVIRONMENTS, V28, P29  
 Parker P., 2001, ENVIRONMENTS, V28, P11  
 Parker P, 2007, LOCAL ENVIRON, V12, P505, DOI 10.1080/13549830701656853  
 Parker P, 2005, LOCAL ENVIRON, V10, P173, DOI 10.1080/1354983052000330761  
 Peattie K, 2010, ANNU REV ENV RESOUR, V35, P195, DOI 10.1146/annurev-environ-032609-094328  
 Ryan D.L., 2009, 2009RP02DRAFT CBEEDA  
 Scott D., 2001, ENVIRONMENTS, V28, P75  
 Shove E, 2003, COMFORT CLEANLINESS  
 Slob A., 2002, GLOBAL WARMING SOCIA  
 Song B.G., 2008, SPATIAL ANAL PARTICI  
 St Denis G, 2009, RENEW SUST ENER REV, V13, P2088, DOI 10.1016/j.rser.2008.09.030  
 Stephenson J, 2010, ENER POLICY, V38, P6120, DOI 10.1016/j.enpol.2010.05.069  
 STERN PC, 1986, EVALUATION REV, V10, P147, DOI 10.1177/0193841X8601000201  
 Stern PC, 1999, J CONSUM POLICY, V22, P461, DOI DOI 10.1023/A:1006211709570  
 Vergragt PJ, 2012, TECHNOL ANAL STRATEG, V24, P407, DOI 10.1080/09537325.2012.663964  
 Wilson C, 2007, ANNU REV ENV RESOUR, V32, P169, DOI 10.1146/annurev.energy.32.053006.141137  
 Zhao TT, 2012, ENER POLICY, V47, P291, DOI 10.1016/j.enpol.2012.04.070

NR 51

TC 13

Z9 13

U1 5

U2 27

PU ELSEVIER SCI LTD

PI OXFORD

PA THE BOULEVARD, LANGFORD LANE, KIDLINGTON, OXFORD OX5 1GB, OXON, ENGLAND

SN 0301-4215

EI 1873-6777

J9 ENER POLICY

JI Energy Policy

PD FEB

PY 2014

VL 65

BP 594

EP 607

DI 10.1016/j.enpol.2013.10.053

PG 14

WC Economics; Energy &amp; Fuels; Environmental Sciences; Environmental Studies

SC Business &amp; Economics; Energy &amp; Fuels; Environmental Sciences &amp; Ecology

GA AA0UV

UT WOS:000330813800058

DA 2018-05-03  
ER

PT J

AU Martinez-Espineira, R  
Garcia-Valinas, MA  
Nauges, C

AF Martinez-Espineira, Roberto  
Garcia-Valinas, Maria A.  
Nauges, Celine

TI Households' pro-environmental habits and investments in water and energy  
consumption: Determinants and relationships

SO JOURNAL OF ENVIRONMENTAL MANAGEMENT

LA English

DT Article

DE Water conservation; Energy conservation; Technology adoption; Habits;  
Multivariate probit

ID WILLINGNESS-TO-PAY; POLICY INSTRUMENTS; PLANNED BEHAVIOR; CONSERVATION;  
TECHNOLOGY; ATTITUDES; EFFICIENT; DEMAND; INFORMATION; INTENTION

AB Economic instruments have received a lot of attention in the literature dealing with water and energy demand management. However factors driving households' behaviour/habits and investment in water-saving and energy-saving equipment have been seldom studied. The main purpose of this article is to contribute to this literature by analysing the main determinants of a set of households' conservation habits and pro-environmental investment decisions. Using household-level data from Spain, we show that conservation habits and the purchase of resource-efficient appliances are not independent. (C) 2013 Elsevier Ltd. All rights reserved.

C1 [Garcia-Valinas, Maria A.] Univ Oviedo, Oviedo Efficiency Grp, Dept Econ, E-33006 Oviedo, Asturias, Spain.

[Martinez-Espineira, Roberto] Mem Univ Newfoundland, Dept Econ, St John, NF, Canada.

[Nauges, Celine] Univ Queensland, Dept Econ, Brisbane, Qld 4072, Australia.

RP Garcia-Valinas, MA (reprint author), Univ Oviedo, Oviedo Efficiency Grp, Dept Econ, E-33006 Oviedo, Asturias, Spain.

EM mariangv@uniovi.es

OI Martinez-Espineira, Roberto/0000-0001-8022-1230; Garcia-Valinas, Maria  
A./0000-0002-6136-2633

CR Abrahamse W, 2005, J ENVIRON PSYCHOL, V25, P273, DOI 10.1016/j.jenvp.2005.08.002

Albadi MH, 2008, ELECTR POW SYST RES, V78, P1989, DOI 10.1016/j.epsr.2008.04.002

Allcott H., 2012, TECHNICAL REPORT

Allcott H, 2011, J PUBLIC ECON, V95, P1082, DOI 10.1016/j.jpubeco.2011.03.003

Allcott H, 2010, SCIENCE, V327, P1204, DOI 10.1126/science.1180775

BERK RA, 1993, CLIMATIC CHANGE, V24, P233, DOI 10.1007/BF01091831

Cappellari L., 2003, STATA J, V3, P278, DOI DOI 10.1016/0304-4076(93)90049-B

Carlsson Kanyama, 2005, INT J CONSUM STUD, V29, P239, DOI [10.1111/j.1470-6431.2005.00409.x, DOI 10.1111/J.1470-6431.2005.00409.X]

Dalen H.M., 2009, OECD C HOUS BEH ENV

de Oliver M, 1999, ENVIRON BEHAV, V31, P372, DOI 10.1177/00139169921972155

Diaz-Rainey I., 2009, P 6 INT C EUR EN MAR, P1

Domene E, 2006, URBAN STUD, V43, P1605, DOI 10.1080/00420980600749969

[Anonymous], 2009, 22009 EEA

Ek K, 2010, ENERG POLICY, V38, P1578, DOI 10.1016/j.enpol.2009.11.041

Galarraga I, 2011, ENERG ECON, V33, pS66, DOI 10.1016/j.eneco.2011.07.028

Greene W. H., 2003, ECONOMETRIC ANAL

Grosche P, 2009, ENERG J, V30, P135

HASSETT KA, 1995, J PUBLIC ECON, V57, P201, DOI 10.1016/0047-2727(94)01452-T

Hawcroft LJ, 2010, J ENVIRON PSYCHOL, V30, P143, DOI 10.1016/j.jenvp.2009.10.003

PROYECTO SECH-SPAHOUSEC, 2011, AN CONS EN SECT RES

International Energy Agency (IEA), 2009, IMPL EN EFF POL AR I

JAFFE AB, 1995, J ENVIRON ECON MANAG, V29, pS43, DOI 10.1006/jeem.1995.1060

KISH L, 1949, J AM STAT ASSOC, V44, P380, DOI 10.2307/2280236  
 Krantz H, 2006, APPL GEOGR, V26, P227, DOI 10.1016/j.apgeog.2006.09.005  
 Labandeira X, 2006, ENERG J, V27, P87  
 Lam SP, 2006, J APPL SOC PSYCHOL, V36, P2803, DOI 10.1111/j.0021-9029.2006.00129.x  
 Linares P, 2010, J ECON SURV, V24, P573, DOI 10.1111/j.1467-6419.2009.00609.x  
 Linden AL, 2006, ENERG POLICY, V34, P1918, DOI 10.1016/j.enpol.2005.01.015  
 Lubell M, 2002, ENVIRON BEHAV, V34, P431, DOI 10.1177/00116502034004002  
 Mahapatra K, 2008, ENERG POLICY, V36, P577, DOI 10.1016/j.enpol.2007.10.006  
 Mainieri T, 1997, J SOC PSYCHOL, V137, P189, DOI 10.1080/00224549709595430  
 Martinez-Espineira R, 2013, INT J WATER RESOUR D, V29, P400, DOI 10.1080/07900627.2012.721695  
 Martinsson J, 2011, ENERG POLICY, V39, P5182, DOI 10.1016/j.enpol.2011.05.046  
 Millock K, 2010, ENVIRON RESOUR ECON, V46, P539, DOI 10.1007/s10640-010-9360-y  
 Mills B, 2012, ENERG POLICY, V49, P616, DOI 10.1016/j.enpol.2012.07.008  
 Nair G, 2010, ENERG POLICY, V38, P2956, DOI 10.1016/j.enpol.2010.01.033  
 Nord M, 1998, ENVIRON BEHAV, V30, P235, DOI 10.1177/0013916598302006  
 OECD, 2011, GREEN HOUS BEH ROL P, P119, DOI [DOI 10.1787/9789264096875-EN, 10.1787/9789264096875-en]  
 Olli E, 2001, ENVIRON BEHAV, V33, P181, DOI 10.1177/0013916501332002  
 [Anonymous], 2009, STAT STAT SOFTW REL  
 Steg L, 2008, ENERG POLICY, V36, P4449, DOI 10.1016/j.enpol.2008.09.027  
 Sutterlin B, 2011, ENERG POLICY, V39, P8137, DOI 10.1016/j.enpol.2011.10.008  
 Train K. E., 2003, DISCRETE CHOICE METH  
 Trumbo CW, 2001, SOC NATUR RESOUR, V14, P889, DOI 10.1080/089419201753242797  
 van den Bergh JCM, 2008, ECOL ECON, V66, P559, DOI 10.1016/j.ecolecon.2008.04.007  
 Weiss J, 2012, ENERG POLICY, V44, P406, DOI 10.1016/j.enpol.2012.02.006

NR 46

TC 13

Z9 15

U1 0

U2 35

PU ACADEMIC PRESS LTD- ELSEVIER SCIENCE LTD

PI LONDON

PA 24-28 OVAL RD, LONDON NW1 7DX, ENGLAND

SN 0301-4797

EI 1095-8630

J9 J ENVIRON MANAGE

JI J. Environ. Manage.

PD JAN 15

PY 2014

VL 133

BP 174

EP 183

DI 10.1016/j.jenvman.2013.12.002

PG 10

WC Environmental Sciences

SC Environmental Sciences &amp; Ecology

GA AA8JH

UT WOS:000331341300020

PM 24374466

DA 2018-05-03

ER

PT J

AU Zvingilaite, E

AF Zvingilaite, Erika

TI Modelling energy savings in the Danish building sector combined with  
 internalisation of health related externalities in a heat and power  
 system optimisation model

SO ENERGY POLICY

LA English

DT Article

DE Energy savings; Energy system modelling; Environmental externalities

ID ELECTRICITY-GENERATION; EFFICIENCY MEASURES; COST

AB A substantial untapped energy saving potential rests in the building sector and is expected to play an important role in achieving reduction of environmental impacts of energy. In order to utilise this potential, effective policy measures need to be adopted to remove the existing barriers and create incentives. For that purpose, the cost effective energy saving options together with an optimal level of savings and expected environmental benefits have to be identified. The paper reports on a study that analyses these questions by including heat-saving measures in buildings into an energy system optimisation model of the Danish heat and power sector. The achieved optimal level of heat savings reaches 11% of projected heat demand in 2025 under the model assumptions. Moreover, the analysis reveals the importance of considering energy conservation options in a system wide perspective. Furthermore, the results suggest that changes in the energy generation sector are the prime driver behind the reduction of environmental externalities of energy. Heat savings in buildings play only a small role under model assumptions. (C) 2012 Elsevier Ltd. All rights reserved.

C1 Tech Univ Denmark, DTU Management Engn, Syst Anal Div, DK-4000 Roskilde, Denmark.

RP Zvingilaite, E (reprint author), Tech Univ Denmark, DTU Management Engn, Syst Anal Div, Frederiksborgvej 399, POB 49, DK-4000 Roskilde, Denmark.

EM erzv@dtu.dk

FU Danish Strategic Research Program on Sustainable Energy [2104-06-0027]

FX The presented study is a part of the research of the Centre for Energy, Environment and Health, financed by The Danish Strategic Research Program on Sustainable Energy under contract no 2104-06-0027. The author is grateful to Bernd Moller for making the data on geographical distribution of the Danish building stock available. Furthermore the author is thankful to Henrik Klinge Jacobsen, Kenneth Karlsson, Marie Munster and Lars Bregnbæk for their helpful contributions.

CR Amstalden RW, 2007, ENER POLICY, V35, P1819, DOI 10.1016/j.enpol.2006.05.018

Andersen F. M., 2009, FREMSKRIVNING ERHVER

Andersen M.S., 2008, 16 ANN C EUR ASS ENV

Bollen J, 2009, RESOUR ENERGY ECON, V31, P161, DOI 10.1016/j.reseneeco.2009.03.001

Brandt J., 2009, 7 INT C AIR QUAL SCI

BYG-DTU, 2004, EN EKS NYE BOL

Czarnowska L, 2012, ENERGY, V41, P212, DOI 10.1016/j.energy.2011.08.004

Danmarks Nationalbank, 2007, MIDD KOB VEJL

DEA, 2009, BIOM

DEA, 2009, FOR SAMF AN EN

DEA, 2005, TECHN DAT EL HEAT GE

DEA, 2005, PERSP DANSK VARM FRE

Ea Energy Analyses, 2008, REN EN COSTS BEN SOC

European Commission, 2008, COM2008780 EUR COMM

EWEA, 2009, COST WIND POW COMP O

Frandsen F. B., 2006, MARKEDET ENERGIBESPA

Gaterell MR, 2005, ENER BUILDINGS, V37, P1017, DOI 10.1016/j.enbuild.2004.12.004

Gulli F, 2006, ENER POLICY, V34, P804, DOI 10.1016/j.enpol.2004.08.008

Gustavsson L, 2011, ENER BUILDINGS, V43, P38, DOI 10.1016/j.enbuild.2010.07.029

Heath GA, 2007, ATMOS ENVIRON, V41, P9159, DOI 10.1016/j.atmosenv.2007.07.055

IEA, 2008, WORLD EN OUTL 2008

International Energy Agency (IEA), 2007, TACKL INV CHALL POW

Jakob M, 2006, ENER POLICY, V34, P172, DOI 10.1016/j.enpol.2004.08.039

Joelsson A, 2008, ENER POLICY, V36, P84, DOI 10.1016/j.enpol.2007.08.021

Kannan R, 2009, APPL ENER, V86, P416, DOI 10.1016/j.apenergy.2008.08.005

Karlsson K, 2008, INT J HYDROGEN ENER, V33, P1777, DOI 10.1016/j.ijhydene.2008.01.031

Klimakommissionen, 2010, DOK KLIM SAML RAPP G

Kragh J, 2011, APPL ENER, V88, P2245, DOI 10.1016/j.apenergy.2010.12.049

Krewitt W, 1999, ENER POLICY, V27, P173, DOI 10.1016/S0301-4215(99)00008-7

Linares P, 2006, 2 ATL WORKSH EN ENV  
 Lund H, 2006, INGENIORFORENINGENS  
 Lund H., 2008, RAMBOLL VARMEPLAN DA, P98  
 Mathiesen B. V., 2009, BAGGRUNDSRAPPORT IDA  
 Metz B., 2007, CONTRIBUTION WORKING  
 Moller B, 2008, MANAG ENVIRON QUAL, V19, P467, DOI 10.1108/14777830810878650  
 Munster M., 2009, THESIS AALBORG U  
 PointCarbon, 2009, POINT CARB OTC PRIC  
 Ravn H.F., 2001, BALMOREL MODEL ANAL  
 Tommerup H, 2006, ENERG BUILDINGS, V38, P618, DOI 10.1016/j.enbuild.2005.08.017  
 Tommerup H., 2008, ENERGIBESPARELSER BY  
 Wittchen K., 2004, VURDERING POTENTIALE  
 Wittchen KB, 2009, POTENTIELLE ENERGIBE  
 Zvingilaite E., 2010, APPL ENERG, V88, P535

NR 43

TC 13

Z9 13

U1 0

U2 17

PU ELSEVIER SCI LTD

PI OXFORD

PA THE BOULEVARD, LANGFORD LANE, KIDLINGTON, OXFORD OX5 1GB, OXON, ENGLAND

SN 0301-4215

J9 ENERG POLICY

JI Energy Policy

PD APR

PY 2013

VL 55

BP 57

EP 72

DI 10.1016/j.enpol.2012.09.056

PG 16

WC Economics; Energy &amp; Fuels; Environmental Sciences; Environmental Studies

SC Business &amp; Economics; Energy &amp; Fuels; Environmental Sciences &amp; Ecology

GA 099FL

UT WOS:000315606700007

DA 2018-05-03

ER

PT J

AU Asadi, S

Hassan, M

Beheshti, A

AF Asadi, Somayeh

Hassan, Marwa

Beheshti, Ali

TI Development and validation of a simple estimating tool to predict  
heating and cooling energy demand for attics of residential buildings

SO ENERGY AND BUILDINGS

LA English

DT Article

DE Residential buildings; Radiant barrier; Multiple regression analysis;

Energy savings; Heating and cooling demand

ID RADIANT BARRIER RETROFITS; MASS-TRANSFER MODEL; TRANSIENT HEAT;

PERFORMANCE; CLIMATE

AB The application of attic radiant barriers as a residential building energy conservation tool has received considerable attention in recent years. Quantifying the benefits of radiant barrier is complicated because the energy savings provided by this system depend on various factors including local climate, geometry,



and other building parameters. Therefore, the objective of this study is to develop a simple estimating tool that may be used by homeowners and designers to assess the effectiveness and economic benefits of radiant barrier under different climatic conditions in the US. The developed tool is based on transient three-dimensional finite element models that were validated based on the results of an experimental field study. The results of the finite element models were used to develop a set of regression equations to predict the thermal performances of radiant barriers under a wide range of operating conditions. Although the theoretical basis behind this tool is robust and accurate, the developed tool is simple, flexible, and user-friendly to encourage its use among practitioners and homeowners with minimal background about this system and heat transfer mechanisms. It is anticipated that the developed tool will facilitate the integration of energy efficiency in residential design and construction. (c) 2012 Elsevier B.V. All rights reserved.

C1 [Asadi, Somayeh; Hassan, Marwa] Louisiana State Univ, Dept Construct Management, Baton Rouge, LA 70803 USA.

[Beheshti, Ali] Louisiana State Univ, Dept Mech Engr, Baton Rouge, LA 70803 USA.

RP Hassan, M (reprint author), Louisiana State Univ, Dept Construct Management, 3130A Patrick Taylor Hall, Baton Rouge, LA 70803 USA.

EM marwa@lsu.edu

RI Hassan, Marwa/D-8803-2015; Beheshti, Ali/B-8959-2011

OI Hassan, Marwa/0000-0001-8087-8232; Beheshti, Ali/0000-0001-9806-611X

FU Industry Ties Research Program; Board of Regents, State of Louisiana (ITRS); RoyOMartin Company

FX The authors would like to acknowledge the Industry Ties Research Program with the Board of Regents, State of Louisiana (ITRS) and RoyOMartin Company for their funding and support of this research.

CR AlAsmar HR, 1996, ASHRAE TRAN, V102, P297

Asadi S., 2011, ASCE P

Asadi S., 2012, 48 ASC ANN INT C P B

Asadi S., 2012, J BUILDING PHYS

Baldinelli G, 2010, BUILD ENVIRON, V45, P1016, DOI 10.1016/j.buildenv.2009.10.009

ABAQUS, 2009, ABAQUS US MAN VERS 6

Fairey P., 1985, 19 INT THERM COND C, P481

Freund R, 2000, SAS SYSTEM REGRESSIO

Law A. M., 2007, SIMULATION MODELING

Medina MA, 2000, ENERG BUILDINGS, V33, P31, DOI 10.1016/S0378-7788(00)00065-7

Medina MA, 1998, J SOL ENERG-T ASME, V120, P39, DOI 10.1115/1.2888045

Medina MA, 1998, J SOL ENERG-T ASME, V120, P32, DOI 10.1115/1.2888044

Medina MA, 2006, BUILD ENVIRON, V41, P1767, DOI 10.1016/j.buildenv.2005.07.018

Michels C, 2008, ENERG BUILDINGS, V40, P445, DOI 10.1016/j.enbuild.2007.03.013

Miranville F, 2003, ENERG BUILDINGS, V35, P997, DOI 10.1016/S0378-7788(03)00035-5

Miranville F, 2008, SOL ENERGY, V82, P399, DOI 10.1016/j.solener.2007.10.012

Miranville F, 2012, ENERG BUILDINGS, V48, P79, DOI 10.1016/j.enbuild.2012.01.013

Miranville F, 2011, J SOL ENERG-T ASME, V133, DOI 10.1115/1.4003730

National Renewable Energy Laboratory, 1995, NRELSP4637668

Petrie T.W., 2000, ASHRAE T, P1175

Soubdhan T, 2005, SOL ENERGY, V79, P311, DOI 10.1016/j.solener.2004.10.009

ULI-The Urban Land Institute, 2008, 7 ULI URI

U. S. Department of Energy, EN EFF REN EN

Zhu L, 2009, ENERG BUILDINGS, V41, P303, DOI 10.1016/j.enbuild.2008.10.003

NR 24

TC 13

Z9 13

U1 1

U2 8

PU ELSEVIER SCIENCE SA

PI LAUSANNE

PA PO BOX 564, 1001 LAUSANNE, SWITZERLAND

SN 0378-7788

J9 ENERG BUILDINGS

J1 Energy Build.

PD NOV  
 PY 2012  
 VL 54  
 BP 12  
 EP 21  
 DI 10.1016/j.enbuild.2012.07.037  
 PG 10  
 WC Construction & Building Technology; Energy & Fuels; Engineering, Civil  
 SC Construction & Building Technology; Energy & Fuels; Engineering  
 GA 059ZU  
 UT WOS:000312745200002  
 DA 2018-05-03  
 ER

PT J  
 AU Korjenic, A  
     Bednar, T  
 AF Korjenic, Azra  
     Bednar, Thomas  
 TI Transformation of Fundamental Parameters for Energy Demand and Indoor  
     Temperature from Room Level to Building Level  
 SO JOURNAL OF BUILDING PHYSICS  
 LA English  
 DT Article  
 DE climate surfaces; heating energy demand; cooling energy demand; summer  
     indoor temperatures; change of location; window size and orientation;  
     storage capacity

ID CLIMATE

AB Because the thermal optimization of a new building must be done in the planning phase, possible thermal optimizations are sought for the building by varying several parameters. This research article is based on the research of 'climate surfaces' by Prof. Keller and Dr Burmeister at the Federal Institute of Technology in Zurich ( Burmeister and Keller, 1998). The question should be resolved whether this simplified method using climate surfaces is applicable to the entire building. The most important parameters of the building have been systematically changed and their impact on energy performance during different outdoor climate changes was observed. As a result, the impacts on the following are presented and discussed: Heat energy demands, Cooling energy demands, and Summer indoor temperatures.

The results of these investigations showed that the 'multizone climate surface' method is a very practical and clear strategy for estimating the thermal behavior of a building by the correct selection of three determining parameters. Already in an early planning stage, it is possible to establish the optimal building data, at a sufficient level of detail, where energy consumption has been concerned. The study is carried out using the monthly energy balance method and dynamic simulation using 'BuildOpt' software. The objective was to establish if the much simpler monthly balance method will give sufficiently precise results for this optimization, or if a simulation must be performed. The results of the analysis indicate that the monthly balance method is inaccurate, especially for buildings with low energy demands. Subsequent studies deal with the optimization of the most important construction assembly parameters of a building for specific climates. The results of the optimization studies are presented in this article.

C1 [Korjenic, Azra; Bednar, Thomas] Vienna Univ Technol, Inst Bldg Construct & Technol, Res Ctr Bldg Phys & Sound Protect, Vienna, Austria.

RP Korjenic, A (reprint author), Vienna Univ Technol, Inst Bldg Construct & Technol, Res Ctr Bldg Phys & Sound Protect, Vienna, Austria.

EM azra.korjenic@tuwien.ac.at

OI Korjenic, Azra/0000-0002-2904-9532

CR Burmeister H, 1998, ENERG BUILDINGS, V28, P167, DOI 10.1016/S0378-7788(98)00012-7

[Anonymous], 2008, WHOL BUILD HEAT AIR

[Anonymous], 2007, 13790 ISOFDIS

Jokisalo J, 2007, ENERG BUILDINGS, V39, P236, DOI 10.1016/j.enbuild.2006.06.007

Kalema T, 2008, J BUILD PHYS, V32, P101, DOI 10.1177/1744259108093920

\*ONORM, 2007, B8110 ONORM 6

SOFIC M, 2007, ANAL GENAUIGKEIT MON  
 NR 7  
 TC 13  
 Z9 13  
 U1 0  
 U2 2  
 PU SAGE PUBLICATIONS LTD  
 PI LONDON  
 PA 1 OLIVERS YARD, 55 CITY ROAD, LONDON EC1Y 1SP, ENGLAND  
 SN 1744-2591  
 J9 J BUILD PHYS  
 JI J. Build Phys.  
 PD APR  
 PY 2010  
 VL 33  
 IS 4  
 BP 327  
 EP 355  
 DI 10.1177/1744259109358284  
 PG 29  
 WC Construction & Building Technology  
 SC Construction & Building Technology  
 GA 576RH  
 UT WOS:000276164500002  
 DA 2018-05-03  
 ER

PT S  
 AU Williams, E  
     Matthews, S  
     Breton, M  
     Brady, T  
 AF Williams, Eric  
     Matthews, Scott  
     Breton, Michael  
     Brady, Todd  
 GP IEEE Computer Society  
 TI Use of a computer-based system to measure and manage energy consumption  
     in the home  
 SO PROCEEDINGS OF THE 2006 IEEE INTERNATIONAL SYMPOSIUM ON ELECTRONICS &  
     THE ENVIRONMENT, CONFERENCE RECORD  
 SE IEEE International Symposium on Electronics and the Environment-ISEE  
 LA English  
 DT Proceedings Paper  
 CT 14th IEEE International Symposium on Electronics and the Environment  
     (ISEE)/7th Electronics Recycling Summit  
 CY MAY 08-11, 2006  
 CL San Francisco, CA  
 SP IEEE Comp Soc, TCEE, Int Assoc Elect Recyclers  
 DE energy use; residences; monitoring and control systems; information  
     technology; peak-shifting; precooling; behavioral patterns  
 AB Energy use in homes represents 21% of US total energy demand in 2004. Managing this sector is an  
     important priority for addressing global warming, conserving resources and improving energy security.  
     Much energy is wasted in delivering energy services not actually used by residents. Two examples include  
     heating/cooling and lighting of unoccupied houses and rooms, and overheating or overcooling to make up  
     for temperature variations. IT-enabled monitoring and control technologies have played an important role  
     in eliminating similar kinds of inefficiencies in other sectors, so it is natural to think that these systems  
     could have an important role in the home as well. The technology level of energy control in most homes is

at least 20 years old, with simple programmable thermostats still in only about a quarter of US homes. Networked thermostats, power meters and switches, and zone heating are technologies that can provide information on energy use and allow it to be controlled for distribution only when needed. In addition to direct energy savings, there is also a demand to reduce indirect needs for energy infrastructure through peak shifting, or redistributing of electricity demand more evenly throughout the day. In addition to surveying these energy management issues, this article also relates the experience of a pilot project setting up monitoring/control systems in three Sacramento homes. The design specifications of these systems combine capabilities for web-based monitoring and control and peak shifting via precooling, and load shedding. The pilot has shown that such a monitoring and control system satisfying the design parameters can be implemented via mainly off-the-shelf parts. Much work remains to be done however, to develop low-cost user friendly systems attractive to typical homeowners.

C1 [Williams, Eric; Matthews, Scott] Carnegie Mellon Univ, Pittsburgh, PA 15213 USA.

[Breton, Michael] Intel Corp, Santa Clara, CA 95051 USA.

[Brady, Todd] Intel Corp, Phoenix, AZ 95051 USA.

Williams, E (reprint author), Carnegie Mellon Univ, Pittsburgh, PA 15213 USA.

EM ericwilliams@cmu.edu; hsm@cmu.edu; msbreton@intel.com;  
todd.a.brady@intel.com

CR \*CARN MELL U GREEN, 2006, EC INP OUTP LIF CYCL

HERTER K, 2005, LBNL58956 L BERK NAT

\*INT EN AG, 1998, PROJ COSTS GEN EL

\*RECS, 2001, RES EN CONS SURV US

UENO T, 2005, EFFECTIVENESS DISPLA, P1289

\*US EN INF ADM, 2004, ANN EN OUTL

NR 6

TC 13

Z9 13

U1 0

U2 3

PU IEEE

PI NEW YORK

PA 345 E 47TH ST, NEW YORK, NY 10017 USA

SN 1095-2020

BN 1-4244-0351-0

J9 IEEE INT SYMP ELECTR

PY 2006

BP 167

EP +

DI 10.1109/ISEE.2006.1650055

PG 3

WC Engineering, Environmental; Engineering, Electrical & Electronic

SC Engineering

GA BEV84

UT WOS:000239657400034

DA 2018-05-03

ER

PT J

AU Miao, L

AF Miao, Lu

TI Examining the impact factors of urban residential energy consumption and

CO2 emissions in China - Evidence from city-level data

SO ECOLOGICAL INDICATORS

LA English

DT Article

DE Residential energy consumption; Residential CO2 emissions; Private  
vehicle ownership; STIRPAT model; Population compactness

ID CARBON-DIOXIDE EMISSIONS; CLIMATE-CHANGE; STIRPAT MODEL; URBANIZATION;  
GROWTH; POPULATION; INCOME; CITIES; AFFLUENCE; LEAD

AB Rapid urbanization has exerted substantial pressure on China's energy system and contributed to climate change. To find the key drivers of urban residential energy consumption and CO<sub>2</sub> emissions, this paper uses an extended Stochastic Impacts by Regression on Population, Affluence and Technology (STIRPAT), model that employs city-level data to examine the influences of population scale, income level, population compactness and price on house-based residential energy consumption, energy-related CO<sub>2</sub> emissions and private vehicle ownership. The empirical results indicate that factors such as population scale, affluence, and population compactness can lead to increases in residential energy consumption and CO<sub>2</sub> emissions. In terms of transportation, income and population scale positively drive the growth of private vehicle ownership, while the fuel price negatively influences private vehicle ownership. Moreover, population scale is the most important factor in residential energy consumption and CO<sub>2</sub> emissions. Finally, policy recommendations are suggested for China's urban development strategy and urban design and to encourage technology innovations that reduce residential energy consumption and CO<sub>2</sub> emissions. (C) 2016 Elsevier Ltd. All rights reserved.

C1 [Miao, Lu] Nagoya Univ, Grad Sch Int Dev, Nagoya, Aichi 4648601, Japan.

RP Miao, L (reprint author), Nagoya Univ, Grad Sch Int Dev, Nagoya, Aichi 4648601, Japan.

EM luoxiaoluoluo1988@gmail.com

CR Breheny M. J., 1992, SUSTAINABLE DEV URBA

Burchell RW, 2000, HOUS POLICY DEBATE, V11, P821

Burton E, 2002, ENVIRON PLANN B, V29, P219, DOI 10.1068/b2713

Burton E., 2001, HOUS STUD ASS SPRING

Chen HY, 2008, HABITAT INT, V32, P28, DOI 10.1016/j.habitatint.2007.06.005

Dargay J, 2007, ENERG J, V28, P143

Dietz T, 1997, P NATL ACAD SCI USA, V94, P175, DOI 10.1073/pnas.94.1.175

EHRlich PR, 1971, SCIENCE, V171, P1212, DOI 10.1126/science.171.3977.1212

Fan JL, 2015, ENERG BUILDINGS, V96, P201, DOI 10.1016/j.enbuild.2015.03.026

Hillman M., 1996, COMPACT CITY SUSTAIN, P30

International Energy Agency, 2009, WORLD EN OUTL

Intergovernmental Panel on Climate Change (IPCC), 2006, GUIDELINES NATL GREE, V2

Ji X, 2016, J CLEAN PROD, DOI [DOI 10.1016/j.jclepro.2015.12.002, 10.1016/j.jclepro.2015.12.002]

Knight C., 1996, COMPACT CITY SUSTAIN, P98

Li K, 2015, RENEW SUST ENERG REV, V52, P1107, DOI 10.1016/j.rser.2015.07.185

Liddle B, 2010, POPUL ENVIRON, V31, P317, DOI 10.1007/s11111-010-0101-5

Liddle B, 2015, GLOBAL ENVIRON CHANG, V31, P62, DOI 10.1016/j.gloenvcha.2014.10.016

Liddle B, 2015, INT J SUSTAIN TRANSP, V9, P502, DOI 10.1080/15568318.2013.814077

Liddle B, 2013, J TRANSP GEOGR, V28, P22, DOI 10.1016/j.jtrangeo.2012.10.010

Lin BQ, 2015, RENEW SUST ENERG REV, V52, P1693, DOI 10.1016/j.rser.2015.08.006

Lin BQ, 2014, ENERG CONVERS MANAGE, V79, P128, DOI 10.1016/j.enconman.2013.12.016

Lu HL, 2014, APPL ENERG, V131, P297, DOI 10.1016/j.apenergy.2014.06.036

Martinez-Zarzoso I, 2011, ECOL ECON, V70, P1344, DOI 10.1016/j.ecolecon.2011.02.009

Mcgranahan G., 2001, CITIZEN RISK URBAN S

Ministry of Construction of China, 1996, CIV BUILD EN SAV DES

Ministry of Housing and Urban-Rural Development of PRC, 2014, CHIN URB RUR CONSTR

Ministry of Housing and Urban-Rural Development of PRC, 2013, CHIN URB CONSTR STAT

Mol A.P.J., 2000, ECOLOGICAL MODERNISA, V9, P17

National Bureau of Statistics, 2015, CHIN STAT YB 2015

National Bureau of Statistics, 2014, CHIN CIT STAT YB

National Bureau of Statistics, 2014, CHIN EN STAT YB 2014

Nie HG, 2014, APPL ENERG, V121, P10, DOI 10.1016/j.apenergy.2014.01.070

OECD, 2012, COMP CIT POL COMP AS

Pachauri S, 2008, ENERG POLICY, V36, P4022, DOI 10.1016/j.enpol.2008.06.016

Poumanyvong P., 2012, IDEC DP2, V2, P1

Poumanyvong P, 2010, ECOL ECON, V70, P434, DOI 10.1016/j.ecolecon.2010.09.029

Riley K, 2002, POPUL ENVIRON, V23, P479, DOI 10.1023/A:1015138118757

Rosenzweig C, 2010, NATURE, V467, P909, DOI 10.1038/467909a

Shahbaz M, 2015, RENEW SUST ENERG REV, V47, P683, DOI 10.1016/j.rser.2015.03.044

Squalli J, 2010, ECOL ECON, V69, P1170, DOI 10.1016/j.ecolecon.2010.01.001

Sun C.-C., 2014, J SOLID STATE LIGHT, V1, P1, DOI DOI 10.1155/2014/316214

Thomas L., 1996, COMPACT CITY SUSTAIN, P44

United Nations, 2014, WORLD URB PROSP  
 Wang P, 2013, APPL ENERG, V106, P65, DOI 10.1016/j.apenergy.2013.01.036  
 Wang Q, 2014, ENERG POLICY, V65, P332, DOI 10.1016/j.enpol.2013.10.005  
 Wang SJ, 2016, ECOL INDIC, V69, P184, DOI 10.1016/j.ecolind.2016.04.022  
 Wang SJ, 2015, ECOL INDIC, V49, P121, DOI 10.1016/j.ecolind.2014.10.004  
 Wang YN, 2015, ECOL INDIC, V50, P186, DOI 10.1016/j.ecolind.2014.11.010  
 Wang ZH, 2012, APPL ENERG, V100, P277, DOI 10.1016/j.apenergy.2012.05.038  
 Wooldridge J. M., 2002, ECONOMETRIC ANAL CRO  
 Xu B, 2016, ECOL INDIC, V63, P346, DOI 10.1016/j.ecolind.2015.11.012  
 Ye H, 2015, ENERG BUILDINGS, V93, P90, DOI 10.1016/j.enbuild.2015.02.011  
 York R, 2003, ECOL ECON, V46, P351, DOI 10.1016/S0921-8009(03)00188-5  
 Zha DL, 2010, ENERG POLICY, V38, P3377, DOI 10.1016/j.enpol.2010.02.011  
 Zhang QY, 2004, ENERG BUILDINGS, V36, P1217, DOI 10.1016/j.enbuild.2003.08.002  
 Zhao CF, 2014, ECOL INDIC, V47, P43, DOI 10.1016/j.ecolind.2014.04.048  
 Zhao XL, 2012, ENERG POLICY, V41, P644, DOI 10.1016/j.enpol.2011.11.027  
 Zheng XY, 2014, ENERG POLICY, V75, P126, DOI 10.1016/j.enpol.2014.07.016  
 Zhou N, 2013, ENERG POLICY, V53, P51, DOI 10.1016/j.enpol.2012.09.065  
 Zhou Y, 2015, RENEW SUST ENERG REV, V52, P863, DOI 10.1016/j.rser.2015.07.158  
 NR 60  
 TC 12  
 Z9 13  
 U1 29  
 U2 56  
 PU ELSEVIER SCIENCE BV  
 PI AMSTERDAM  
 PA PO BOX 211, 1000 AE AMSTERDAM, NETHERLANDS  
 SN 1470-160X  
 EI 1872-7034  
 J9 ECOL INDIC  
 JI Ecol. Indic.  
 PD FEB  
 PY 2017  
 VL 73  
 BP 29  
 EP 37  
 DI 10.1016/j.ecolind.2016.09.031  
 PG 9  
 WC Biodiversity Conservation; Environmental Sciences  
 SC Biodiversity & Conservation; Environmental Sciences & Ecology  
 GA EQ8KN  
 UT WOS:000398334400004  
 DA 2018-05-03  
 ER  
  
 PT J  
 AU Oh, SJ  
     Ng, KC  
     Thu, K  
     Chun, W  
     Chua, KJE  
 AF Oh, Seung Jin  
     Ng, Kim Choon  
     Thu, Kyaw  
     Chun, Wongee  
     Chua, Kian Jon Ernest  
 TI Forecasting long-term electricity demand for cooling of Singapore's  
    buildings incorporating an innovative air-conditioning technology  
 SO ENERGY AND BUILDINGS

LA English

DT Article

DE Air conditioning; District cooling; Novel cooling technology;  
Electricity forecast model; Carbon footprint

ID BOTTOM-UP; DISTRICT; SYSTEMS

AB In an effort to accurately plan for investment on energy production and distribution, this paper proposes a long-term electricity consumption forecasting model for buildings' cooling by employing a high energy conservative scenario. The key aspect of the high energy conservative scenario is to adopt an innovative adsorbent-based dehumidifier and an indirect evaporative cooling (AD-IEC) technology as opposed to conventional mechanical vapor compression system. Bottom-up equations were developed to identify the cooling load and electricity consumption of both residential and non-residential buildings for the period 2002-2013. Based on the time-series electricity consumption, a multiple linear regression model is developed to forecast electricity demand for the future period of 2014-2030. It is found that the electricity demands for cooling in the building sectors account for 31 +/- 2% of the total electricity consumption in Singapore. This study concluded that the high conservative scenario realizes the best potential of electricity saving of 21,096 GWh until 2030. Using a CO<sub>2</sub> emission factor of 4.49 x 10<sup>-4</sup> metric tons CO<sub>2</sub>/kWh, the total carbon footprint saving from all power plants is estimated to be 9491,264t of CO<sub>2</sub>. This work evolves a new forecasting methodology to predict buildings' cooling energy consumption involving the use of novel cooling technologies. (C) 2016 Elsevier B.V. All rights reserved.

C1 [Oh, Seung Jin; Ng, Kim Choon; Thu, Kyaw; Chua, Kian Jon Ernest] Natl Univ Singapore, Dept Mech Engr, 9 Engr Dr 1, Singapore 117576, Singapore.

[Chun, Wongee] Jeju Natl Univ, Dept Nucl & Energy Engr, 1 Ara 1 Dong, Jeju 63243, South Korea.

RP Chua, KJE (reprint author), Natl Univ Singapore, Dept Mech Engr, 9 Engr Dr 1, Singapore 117576, Singapore.

EM mpeckje@nus.edu.sg

OI Ng, Kim Choon/0000-0003-3930-4127; Chua, Kian Jon/0000-0001-9293-7471

FU National Research Foundation of Singapore [R-265-000-466-281]; Korean National Research Foundation [2014R1A2A1A01006421]

FX The authors gratefully acknowledged the financial support from National Research Foundation of Singapore (grant no. R-265-000-466-281) and Korean National Research Foundation (grant no. 2014R1A2A1A01006421)

CR Arnold W., 2002, NY TIMES

Braun MR, 2014, APPL ENERG, V130, P305, DOI 10.1016/j.apenergy.2014.05.062

Brum M, 2015, ENERG BUILDINGS, V92, P306, DOI 10.1016/j.enbuild.2015.01.045

Building Construction Authority of Singapore, 2014, BCA BUILD EN BENCHM

Chan ALS, 2006, ENERG CONVERS MANAGE, V47, P87, DOI 10.1016/j.enconman.2005.02.010

Chow T.T., 2004, APPL ENERG, V79

Christopher M.L., 2007, ENERG ENG, V104, P34

Chua K.J., 2012, C EN SUST CIT SING

de Munck C, 2013, INT J CLIMATOL, V33, P210, DOI 10.1002/joc.3415

[Anonymous], 2009, 53 EL MECH SERV DEP

EMA, 2014, SING EN STAT 2014

Energy Market Authority of Singapore, 2009, DISTR COOL SERV SUPP

Fan H, 2015, ENERG BUILDINGS, V105, P9, DOI 10.1016/j.enbuild.2015.07.030

Hida Y., 2008, TECH REV, V45, P37

[Anonymous], HDB ANN REP 2013

Hughes B, 2013, SUSTAIN CITIES SOC, V7, P37, DOI 10.1016/j.scs.2012.10.002

Jacobsen HK, 1998, ENERG ECON, V20, P443

Kee T. P., 2010, DISTRICT COOLING ENE

Li K.K., 2009, P INT C PLANN LOW CA

Mohamed Z, 2005, ENERGY, V30, P1833, DOI 10.1016/j.energy.2004.08.012

Nagota T, 2008, ENERG BUILDINGS, V40, P732, DOI 10.1016/j.enbuild.2007.05.007

[Anonymous], 2011, AIR CON SYST EFF PRI

Navidi W., 2010, STAT ENG SCI

Park J.S., 2015, ENERGY BUILD

Peterson K.W., 2014, RACA J, V30, P27

Sapar M.H., 2014, 2 IBPSA ENGL C ASS C

Singapore's Second National Communication, 2010, UN FRAM CONV CLIM CH

Todesco G, 2005, ASHRAE J, V47, P18  
 [Anonymous], STOCK VAC SUPPL PIP  
 Widen J, 2009, ENERGBUILDINGS, V41, P1001, DOI 10.1016/j.enbuild.2009.05.002  
 [Anonymous], 2014, SINGAPORES 3 NATL CO  
 [Anonymous], 2007, ASHRAE HONG KONG CHA

NR 32

TC 12

Z9 12

U1 3

U2 18

PU ELSEVIER SCIENCE SA

PI LAUSANNE

PA PO BOX 564, 1001 LAUSANNE, SWITZERLAND

SN 0378-7788

EI 1872-6178

J9 ENERGBUILDINGS

J1 Energy Build.

PD SEP 1

PY 2016

VL 127

BP 183

EP 193

DI 10.1016/j.enbuild.2016.05.073

PG 11

WC Construction & Building Technology; Energy & Fuels; Engineering, Civil

SC Construction & Building Technology; Energy & Fuels; Engineering

GA DT5NH

UT WOS:000381529400016

DA 2018-05-03

ER

PT J

AU Yu, Z

Haghighat, F

Fung, BCM

AF Yu, Zhun (Jerry)

Haghighat, Fariborz

Fung, Benjamin C. M.

TI Advances and challenges in building engineering and data mining  
 applications for energy-efficient communities

SO SUSTAINABLE CITIES AND SOCIETY

LA English

DT Article

DE Data Mining; Building Energy Use; Occupant Behavior; Big Data; Review

ID FAULT-DETECTION; KNOWLEDGE DISCOVERY; NEURAL-NETWORK; CONSUMPTION;

DIAGNOSIS; PERFORMANCE; FRAMEWORK; SYSTEMS; SIMULATION; PREDICTION

AB The rapidly growing and gigantic body of stored data in the building field, coupled with the need for data analysis, has generated an urgent need for powerful tools that can extract hidden but useful knowledge of building performance improvement from large data sets. As an emerging subfield of computer science, data mining technologies suit this need well and have been proposed for relevant knowledge discovery in the past several years. Aimed to highlight recent advances, this paper provides an overview of the studies undertaking the two main data mining tasks (i.e. predictive tasks and descriptive tasks) in the building field. Based on the overview, major challenges and future research trends are also discussed. (C) 2015 The Authors. Published by Elsevier Ltd.

C1 [Yu, Zhun (Jerry)] Hunan Univ, Coll Civil Engr, Changsha 410082, Hunan, Peoples R China.

[Haghighat, Fariborz] Concordia Univ, Dept Bldg Civil & Environm Engr, Montreal, PQ H3G 1M8, Canada.

[Fung, Benjamin C. M.] McGill Univ, Sch Informat Studies, Montreal, PQ H3A 1X1, Canada.



RP Haghghat, F (reprint author), Concordia Univ, Dept Bldg Civil & Environm Engr, Montreal, PQ H3G 1M8, Canada.

EM haggi@bcee.concordia.ca

CR Ahmad AS, 2014, RENEW SUST ENERG REV, V33, P102, DOI 10.1016/j.rser.2014.01.069

Ahmed A, 2011, ADV ENG INFORM, V25, P341, DOI 10.1016/j.aei.2010.10.002

Basu K., 2012, IECON 2012

Basu K, 2013, ENERG BUILDINGS, V67, P668, DOI 10.1016/j.enbuild.2013.02.008

Beckel C, 2014, ENERGY, V78, P397, DOI 10.1016/j.energy.2014.10.025

Bonvini M, 2014, APPL ENERG, V124, P156, DOI 10.1016/j.apenergy.2014.03.009

Cabena P., 1998, DISCOVERING DATAMINI

Cabrera DFM, 2013, ENERG BUILDINGS, V62, P210, DOI 10.1016/j.enbuild.2013.02.049

Chicco G, 2012, ENERGY, V42, P68, DOI 10.1016/j.energy.2011.12.031

Chou JS, 2014, ENERG BUILDINGS, V82, P437, DOI 10.1016/j.enbuild.2014.07.036

Chou JS, 2014, EXPERT SYST APPL, V41, P2144, DOI 10.1016/j.eswa.2013.09.013

Congradac V, 2009, ENERG BUILDINGS, V41, P571, DOI 10.1016/j.enbuild.2008.12.004

D'Oca S, 2015, ENERG BUILDINGS, V88, P395, DOI 10.1016/j.enbuild.2014.11.065

D'Oca S, 2014, BUILD ENVIRON, V82, P726, DOI 10.1016/j.buildenv.2014.10.021

Du ZM, 2014, BUILD ENVIRON, V73, P1, DOI 10.1016/j.buildenv.2013.11.021

Fan C, 2015, AUTOMAT CONSTR, V50, P81, DOI 10.1016/j.autcon.2014.12.006

Fan CF, 2014, J OPHTHALMOL, DOI 10.1155/2014/382702

Hussain S, 2014, CONTROL ENG PRACT, V32, P172, DOI 10.1016/j.conengprac.2014.08.007

Jia Wei Han, 2012, DATA MINING CONCEPTS

Katipamula S, 2005, HVAC&R RES, V11, P3, DOI 10.1080/10789669.2005.10391123

Khan I, 2013, ENRGY PROCED, V42, P557, DOI 10.1016/j.egypro.2013.11.057

Kim H, 2011, AUTOMAT CONSTR, V20, P37, DOI 10.1016/j.autcon.2010.07.006

Kucuksille EU, 2011, ENERG CONVERS MANAGE, V52, P836, DOI 10.1016/j.enconman.2010.08.009

Kumar R, 2013, ENERG BUILDINGS, V65, P352, DOI 10.1016/j.enbuild.2013.06.007

Lai YX, 2013, INFORM SCIENCES, V230, P39, DOI 10.1016/j.ins.2012.10.002

Lange B., 2013, P SPIE, V8650

Lauro F, 2014, ENRGY PROCED, V62, P411, DOI 10.1016/j.egypro.2014.12.403

Li MC, 2014, ENERG BUILDINGS, V82, P47, DOI 10.1016/j.enbuild.2014.07.010

Li Q., 2010, P 2010 INT C ADV EN

Magoules F, 2013, ENERG BUILDINGS, V62, P133, DOI 10.1016/j.enbuild.2013.02.050

Miller C, 2015, AUTOMAT CONSTR, V49, P1, DOI 10.1016/j.autcon.2014.09.004

Moon JW, 2014, ENERG BUILDINGS, V85, P59, DOI 10.1016/j.enbuild.2014.09.018

Mulumba T, 2015, ENERG BUILDINGS, V86, P698, DOI 10.1016/j.enbuild.2014.10.069

Muratori M, 2013, APPL ENERG, V107, P465, DOI 10.1016/j.apenergy.2013.02.057

Rhodes JD, 2014, APPL ENERG, V135, P461, DOI 10.1016/j.apenergy.2014.08.111

Rollins S., 2014, 2014 IEEE INT C PERV

Stoppel CM, 2014, ENERG BUILDINGS, V68, P99, DOI 10.1016/j.enbuild.2013.08.042

Sun KY, 2014, BUILD ENVIRON, V79, P1, DOI 10.1016/j.buildenv.2014.04.030

Usama F., 1996, AI MAG, V17, P37

Xiao F, 2014, ENERG BUILDINGS, V75, P109, DOI 10.1016/j.enbuild.2014.02.005

Yan K, 2014, ENERG BUILDINGS, V81, P287, DOI 10.1016/j.enbuild.2014.05.049

Yu Z, 2011, ENERG BUILDINGS, V43, P1409, DOI 10.1016/j.enbuild.2011.02.002

Yu Z, 2010, ENERG BUILDINGS, V42, P1637, DOI 10.1016/j.enbuild.2010.04.006

Yu Z, 2013, BUILD SIMUL-CHINA, V6, P207, DOI 10.1007/s12273-013-0117-8

Yu Z, 2012, ENERG BUILDINGS, V47, P430, DOI 10.1016/j.enbuild.2011.12.018

Yu Z, 2011, ENERGY, V36, P6596, DOI 10.1016/j.energy.2011.09.002

Zhao HX, 2012, RENEW SUST ENERG REV, V16, P3586, DOI 10.1016/j.rser.2012.02.049

Zhao H. X., 2011, P 2011 IEEE S COMP I

Zhao J, 2014, ENERG BUILDINGS, V82, P341, DOI 10.1016/j.enbuild.2014.07.033

NR 49

TC 12

Z9 12

U1 5

U2 16

PU ELSEVIER SCIENCE BV

PI AMSTERDAM  
 PA PO BOX 211, 1000 AE AMSTERDAM, NETHERLANDS  
 SN 2210-6707  
 EI 2210-6715  
 J9 SUSTAIN CITIES SOC  
 JI Sust. Cities Soc.  
 PD AUG  
 PY 2016  
 VL 25  
 BP 33  
 EP 38  
 DI 10.1016/j.scs.2015.12.001  
 PG 6  
 WC Construction & Building Technology; GREEN & SUSTAINABLE SCIENCE &  
 TECHNOLOGY; Energy & Fuels  
 SC Construction & Building Technology; Science & Technology - Other Topics;  
 Energy & Fuels  
 GA EE1DF  
 UT WOS:000389320300004  
 OA gold  
 DA 2018-05-03  
 ER

PT J

AU Cetin, KS  
 Manuel, L  
 Novoselac, A

AF Cetin, Kristen S.  
 Manuel, Lance  
 Novoselac, Atila

TI Effect of technology-enabled time-of-use energy pricing on thermal  
 comfort and energy use in mechanically-conditioned residential buildings  
 in cooling dominated climates

SO BUILDING AND ENVIRONMENT

LA English

DT Article

DE Building energy modeling; Response surface methodology; Thermal comfort;  
 Time-of-use pricing

ID ARTIFICIAL NEURAL-NETWORK; MASS; MODEL; PREDICT; DEMAND; LOAD

AB The effects of automatic indoor set point temperature setbacks using smart thermostats in response to time-of-use (TOU) electricity rates structures on occupant thermal comfort are evaluated for representative single family residential buildings located in 3 climate zones with dominant cooling loads. Building energy models (BEM) of single family homes are evaluated using a full factorial experimental design to create a response surface which provides a continuous function to evaluate the impact of four design variables on long-term thermal comfort indices, including Average Percent of People Dissatisfied (Average PPD), and Percentage Outside Thermal Comfort Zone (POS). These design variables include indoor set point temperature, degrees of setback temperature in cooling mode, building thermal mass, and air exchange rate for each climate zone. These are compared to the relative energy savings resulting from TOU thermostat setbacks while considering other design variables. A second-order response surface is found to provide a reasonable fit to BEM simulation in- and out-of-sample data. The set point temperature is the most influential of the variables studied in decreasing long-term thermal comfort, while reducing HVAC electricity use. The thermostat setback has the strongest influence on thermal comfort in a hot-dry climate, while the most HVAC energy savings is able to be achieved in the mixed-humid climate zone. The results are tabulated for weighing the costs and benefits of TOU electricity rates for homes with different characteristics, in climate zones with air conditioning-dominate energy consumption. (C) 2015 Elsevier Ltd. All rights reserved.

C1 [Cetin, Kristen S.] Iowa State Univ, Dept Civil Construct & Environm Engrn, Ames, IA USA.

[Manuel, Lance; Novoselac, Atila] Univ Texas Austin, Dept Civil Architectural & Environm Engn, Austin, TX 78712 USA.

RP Cetin, KS (reprint author), Iowa State Univ, Dept Civil Construct & Environm Engn, Ames, IA USA.  
EM kcerin@iastate.edu

OI Manuel, Lance/0000-0002-0602-3014

FU National Science Foundation IGERT [DGE-0966298]

FX This work was supported by the National Science Foundation IGERT Grant

no. DGE-0966298. Any opinion, findings, and conclusions or recommendations expressed in this material are those of the authors and do not necessarily reflect the views of the National Science Foundation.

CR Air Conditioning Contractors of America, 2011, RES LOAD CALC MAN J

Akimoto T, 2010, BUILD ENVIRON, V45, P45, DOI 10.1016/j.buildenv.2009.06.022

ASHRAE (American Society of Heating Refrigerating and Airconditioning Engineer), 2013, 552013

ASHRAE

[IES (Illuminating Engineering Society) ANSI (American National Standards Institute) ASHRAE

(American Society of Heating Refrigerating and Air-Conditioning Engineers)], 2013, 9012013 ASHRAE

ANSIA

Ashtiani A, 2014, ENERGBUILDINGS, V76, P597, DOI 10.1016/j.enbuild.2014.03.018

Balaras CA, 1996, ENERGBUILDINGS, V24, P1, DOI 10.1016/0378-7788(95)00956-6

BERARDI BM, 1991, INT ARCH OCC ENV HEA, V63, P233, DOI 10.1007/BF00386371

Borgeson S., 2010, P C AD CHANG NEW THI

BOX GEP, 1951, J ROY STAT SOC B, V13, P1

Carlucci S., 2015, ENERGY BUILD, V102, P117

Carlucci S, 2012, ENERGBUILDINGS, V53, P194, DOI 10.1016/j.enbuild.2012.06.015

Cetin KS, 2014, ENERGBUILDINGS, V84, P716, DOI 10.1016/j.enbuild.2014.07.045

Cetin KS, 2015, ENERGBUILDINGS, V96, P210, DOI 10.1016/j.enbuild.2015.03.039

Cetin K.S., 2015, SCI TECHNOL IN PRESS

Chang Y.C., 2015, APPL MECH MAT, V716, P1399

Cole WJ, 2013, P AMER CONTR CONF, P449

Eisenhower B, 2012, J BUILD PERFORM SIMU, V5, P171, DOI 10.1080/19401493.2010.549964  
EN, 2006, 15251 EN

Fang X., 2011, NRELJA550049899

Fanger PO, 1967, ASHRAE T, V73, P4

Fanger P. O, 1972, THERMAL COMFORT

Goyal S, 2012, ENERGBUILDINGS, V47, P332, DOI 10.1016/j.enbuild.2011.12.005

Hammersley J.M., 1964, PERCOLATION PROCESSE, P134

Hendron R., 2010, BUILDING AM HOUSE SI

Hensen J.L., 2012, BUILDING PERFORMANCE

Henze G., 2007, ENERGY BUILD, V29, P221

Henze GP, 2005, HVAC&R RES, V11, P189, DOI 10.1080/10789669.2005.10391134

Henze GP, 2008, ASHRAE TRAN, V114, P75

[Anonymous], 2005, 7730 ISO

Isaac M, 2009, ENERGPOLICY, V37, P507, DOI 10.1016/j.enpol.2008.09.051

Kang SC, 2010, PROBABILIST ENG MECH, V25, P365, DOI 10.1016/j.probenmech.2010.04.002

Keeney KR, 1997, ASHRAE TRAN, V103, P463

Keeney K.R., INT J HVAC R RES, V2

Khalajzadeh V, 2011, ENERGBUILDINGS, V43, P1288, DOI 10.1016/j.enbuild.2011.01.007

Khuri AI, 2010, WIRES COMPUT STAT, V2, P128, DOI 10.1002/wics.73

Klepeis NE, 2001, J EXPO ANAL ENV EPID, V11, P231, DOI 10.1038/sj.jea.7500165

La Roche P, 2004, SOL ENERGY, V77, P421, DOI 10.1016/j.solener.2003.09.004

Meyer R.H., 2011, RESPONSE SURFACE MET

Newsham GR, 2010, ENERGPOLICY, V38, P3289, DOI 10.1016/j.enpol.2010.01.027

Nicol J.F., 2008, P AIR COND LOW CARB, P27

Offermann F.J., 2009, VENTILATION INDOOR A

Ogoli DM, 2003, ENERGBUILDINGS, V35, P851, DOI 10.1016/S0378-7788(02)00246-3

Olesen B.W., 1979, DISCOMFORT CAUSED VE

Olesen B.W., 2004, ASHRAE J, V8, P20

Pecan Street Research Institute, DAT RES BUILD EN CON

Peeters L, 2009, APPL ENERG, V86, P772, DOI 10.1016/j.apenergy.2008.07.011  
 Rhodes J, 2012, ASHRAE TRAN, V118, P143  
 Rijal HB, 2007, ENERG BUILDINGS, V39, P823, DOI 10.1016/j.enbuild.2007.02.003  
 Sage-Lauck JS, 2014, ENERG BUILDINGS, V79, P32, DOI 10.1016/j.enbuild.2014.04.028  
 Schellen L, 2010, INDOOR AIR, V20, P273, DOI 10.1111/j.1600-0668.2010.00657.x  
 Siemann M., 2013, THESIS U MARYLAND  
 U.S. Department of Energy, ENERGYPLUS VERS 8 2  
 United States Energy Information Administration RECS, 2009, RECS RES EN CONS SUR  
 Wattles P., 2012, DEMAND RESPONSE ERCO  
 Wilcox S., 2007, NRELTP58141364  
 Wong LT, 2014, BUILD ENVIRON, V82, P171, DOI 10.1016/j.buildenv.2014.08.018  
 Woods J., 2013, THERM PERF EXT ENV W  
 Wyon D.P., 1993, VERTICAL TEMPERATURE  
 Yuce B, 2014, ENERG BUILDINGS, V80, P45, DOI 10.1016/j.enbuild.2014.04.052  
 Zhang H, 2005, P IND AIR 2005 10 IN, P133

NR 60

TC 12

Z9 12

U1 1

U2 13

PU PERGAMON-ELSEVIER SCIENCE LTD

PI OXFORD

PA THE BOULEVARD, LANGFORD LANE, KIDLINGTON, OXFORD OX5 1GB, ENGLAND

SN 0360-1323

EI 1873-684X

J9 BUILD ENVIRON

JI Build. Environ.

PD FEB 1

PY 2016

VL 96

BP 118

EP 130

DI 10.1016/j.buildenv.2015.11.012

PG 13

WC Construction & Building Technology; Engineering, Environmental;  
 Engineering, Civil

SC Construction & Building Technology; Engineering

GA DC4QX

UT WOS:000369206500011

DA 2018-05-03

ER

PT J

AU Palm, J

Reindl, K

AF Palm, Jenny

Reindl, Katharina

TI Understanding energy efficiency in Swedish residential building

renovation: A practice theory approach

SO ENERGY RESEARCH & SOCIAL SCIENCE

LA English

DT Article

DE Renovation; Energy efficiency; Multi-family dwellings; Practice theory

ID PERFORMANCE; CONSUMPTION; SCIENCE

AB Examining renovation processes having reduced energy consumption as an explicit goal, this article considers how energy efficiency is made part of renovation processes, focusing on the planning and design phase. Interviews and participant observations of meetings have been conducted. Applying a framework developed in practice theory, we demonstrate the importance of understanding routines, technology,

meanings, and knowledge in order to understand why renovation processes repeat themselves and why a renovation practice are hard to change.

The analysis shows that the professionals were only engaged in decisions in relation to their own specialized areas, which benefited established solutions. The existing technical infrastructure, such as the HVAC shafts and the district heating system, largely determined what issues were up for discussion. It was clear that practical know-how were valued much higher than theoretical knowledge. The meaning of an energy efficient renovations for the professionals was to reduce the energy consumed as much as possible in every renovated building. With this in mind, we were surprised by how little energy efficiency was on the agenda. We can conclude that there was nothing in the studied processes that could trigger changes and dislodge the inertia of the practice. (C) 2015 Elsevier Ltd. All rights reserved.

C1 [Palm, Jenny; Reindl, Katharina] Linkoping Univ, Dept Themat Studies Technol & Social Change, S-58183 Linkoping, Sweden.

RP Palm, J (reprint author), Linkoping Univ, Dept Themat Studies Technol & Social Change, S-58183 Linkoping, Sweden.

EM jenny.palm@liu.se; katharina.reindl@liu.se

OI Palm, Jenny/0000-0001-7694-7397

FU FORMAS; IQS Samhallsbyggnad [2012-246]

FX This work was supported by FORMAS and IQS Samhallsbyggnad under grant number 2012-246. The authors would also like to acknowledge the valuable comments from the anonymous reviewers.

CR Callon M., 1987, SOCIAL CONSTRUCTION, P83

Giddens A., 1984, CONSTITUTION SOC OUT

Gieryn TF, 2002, THEOR SOC, V31, P35, DOI 10.1023/A:1014404201290

Gram-Hanssen K, 2011, J CONSUM CULT, V11, P61, DOI 10.1177/1469540510391725

Gram-Hanssen K, 2010, BUILD RES INF, V38, P175, DOI 10.1080/09613210903541527

Guy S., 2000, ROUTLEDGE RES GLOBAL

Janda KB, 2013, BUILD RES INF, V41, P39, DOI 10.1080/09613218.2013.743396

Karvonen A, 2013, BUILD RES INF, V41, P563, DOI 10.1080/09613218.2013.805298

Konstantinou T, 2013, ENERG BUILDINGS, V59, P301, DOI 10.1016/j.enbuild.2012.12.023

Kvale S, 2009, INTERVIEWS LEARNING

Maxwell J. A., 2005, APPL SOCIAL RES METH, V99-0497898-0 ; 41

Meijer F, 2009, BUILD RES INF, V37, P533, DOI 10.1080/09613210903189376

Moezzi M, 2014, ENERGY RES SOC SCI, V1, P30, DOI 10.1016/j.erss.2014.03.014

Nystrom J., 2014, INT C CONSTR CHANG W

Palm J, 2014, SCI TECHNOL STUD, V27, P72

Palm J, 2013, ENERG POLICY, V62, P762, DOI 10.1016/j.enpol.2013.08.018

Palm J, 2013, HOUSING STUD, V28, P57, DOI 10.1080/02673037.2013.729266

PETTIGREW AM, 1992, STRATEGIC MANAGE J, V13, P5, DOI 10.1002/smj.4250130903

PINCH TJ, 1987, SOCIAL CONSTRUCTION, P17, DOI DOI 10.1177/030631284014003004

Reckwitz A., 2002, EUR J SOC THEORY, V5, P243, DOI [10.1177/13684310222225432, DOI 10.1177/13684310222225432]

SCB (Statistics Sweden), 2013, STAT ARSB SVER 2013

Schatzki T., 1996, SOCIAL PRACTICES WIT

Shove E., 2005, Journal of Consumer Culture, V5, P43, DOI 10.1177/1469540505049846

Shove E., 2012, DYNAMICS SOCIAL PRAC

Sovacool BK, 2014, ENERGY RES SOC SCI, V1, P1, DOI 10.1016/j.erss.2014.02.003

Star S. L., 1990, SOCIOL REV MONOGR, V38, P26, DOI DOI 10.1111/J.1467-954X.1990.TB03347.X

Statens offentliga utredningar, 2008, VEG TILL EN SVER SLU, V2008, P110

Swedish Energy Agency, 2015, EN SIFFR 2015

Swedish National Board of Housing Building and Planning and Swedish Energy Agency, 2013, FORSL TILL NAT START

Thollander P., 2013, IMPROVING ENERGY EFF

Thuvander L, 2012, SUSTAINABILITY-BASEL, V4, P1188, DOI 10.3390/su4061188

Vlasova L, 2014, BUILD RES INF, V42, P512, DOI 10.1080/09613218.2014.907682

WOOLGAR S, 1991, SCI TECHNOL HUM VAL, V16, P20, DOI 10.1177/016224399101600102

Yin R.K., 2003, APPL SOCIAL RES METH

NR 34

TC 12

Z9 12  
 U1 1  
 U2 5  
 PU ELSEVIER SCIENCE BV  
 PI AMSTERDAM  
 PA PO BOX 211, 1000 AE AMSTERDAM, NETHERLANDS  
 SN 2214-6296  
 EI 2214-6326  
 J9 ENERGY RES SOC SCI  
 JI Energy Res. Soc. Sci.  
 PD JAN  
 PY 2016  
 VL 11  
 BP 247  
 EP 255  
 DI 10.1016/j.erss.2015.11.006  
 PG 9  
 WC Environmental Studies  
 SC Environmental Sciences & Ecology  
 GA DQ8AD  
 UT WOS:000379430400023  
 DA 2018-05-03  
 ER

PT J

AU Calderon, C

James, P

Urquizo, J

McLoughlin, A

AF Calderon, Carlos

James, Philip

Urquizo, Javier

McLoughlin, Adrian

TI A GIS domestic building framework to estimate energy end-use demand in UK sub-city areas

SO ENERGY AND BUILDINGS

LA English

DT Article

DE Cities; Energy; Data sets; Neighbourhood; Districts; Local energy policy; Modelling; GIS

ID RESIDENTIAL SECTOR; UNCERTAINTY; CONSUMPTION; SENSITIVITY

AB This paper presents the development, evaluation and application of a spatially referenced domestic building level framework (i.e. address level) to estimate domestic energy end-use demand baseline in sub-city areas. The paper core idea and conclusion is that unless knowledge and model estimating is available at an appropriate level, future UK local energy infrastructure planning will not be effective. Our framework innovatively combines a dataset, which includes detailed building surveys of 60,977 out of a total of 139,257 dwellings, with a normalised national dataset (i.e. the English Housing Survey) and applied to a BRE Domestic Energy Model (i.e. Cambridge Housing Model) so as to establish an energy consumption baseline for the domestic stock in localised areas of Newcastle upon Tyne. Our validation results show a poor alignment with existing observed data as published by the Department of Energy and Climate Change (DECC), particularly at neighbourhood scale. Our belief is that as spatial resolution is increased, local building and urban socio-economic and physical characteristics play a more important part in the estimation of dwelling energy consumption. Thus, we propose a taxonomy to holistically deal with the sources of uncertainty arising from these issues and the components of our framework. (C) 2015 Elsevier B.V. All rights reserved.

C1 [Calderon, Carlos; Urquizo, Javier] Newcastle Univ, Sch Architecture Planning & Landscape, Newcastle Upon Tyne NE1 7RU, Tyne & Wear, England.

- [James, Philip] Newcastle Univ, Sch Civil Engn & Geosci, Newcastle Upon Tyne NE1 7RU, Tyne & Wear, England.
- [McLoughlin, Adrian] Newcastle City Council, Civic Ctr, Climate Change Officer, Newcastle Upon Tyne NE1 8QH, Tyne & Wear, England.
- RP Calderon, C (reprint author), Newcastle Univ, Sch Architecture Planning & Landscape, Newcastle Upon Tyne NE1 7RU, Tyne & Wear, England.
- EM carlos.calderon@newcastle.ac.uk; philip.james@newcastle.ac.uk;  
j.urquizo@newcastle.ac.uk; adrian.mcloughlin@newcastle.gov.uk
- OI Calderon, Carlos/0000-0003-1201-7160
- FU Newcastle University; Newcastle City Council; Science City
- FX We would like to thank Newcastle University, Science City and Newcastle City Council for their financial and in kind support. Without that, this research would not have been possible. We would also like to thank early inputs from Prof. Tom Wagner, Mr David Alderson, and Mr Tom Bradley.
- CR BRE, 2011, COMM RED CARB EM GOV  
Calderon C., 2013, 21 GIS RES UK C GISR  
Calderon C., 2012, RETROFIT 2012  
Cheng V, 2011, ENVIRON MODELL SOFTW, V26, P1186, DOI 10.1016/j.envsoft.2011.04.005  
CSE, 2013, ADDR LEV DAT NAT HEA  
Firth SK, 2010, BUILD RES INF, V38, P25, DOI 10.1080/09613210903236706  
Firth S.K., 2011, DISAGGREGATED SCENAR  
FOTHERINGHAM AS, 1993, INT J GEOGR INF SYST, V7, P3, DOI 10.1080/02693799308901936  
Gehlke CE, 1934, J AM STAT ASSOC, V29, P169, DOI 10.2307/2277827  
Gomez-Rubio V, 2010, TECHNICAL REPORT  
Government, 2013, NAT EN EFF DAT FRAM  
Grid N., 2012, GAS DEMAND FORECASTI  
Hamilton I, 2011, REPORT EXPLORATORY A  
Han PKJ, 2011, MED DECIS MAKING, V31, P828, DOI 10.1177/0272989X11393976  
Hickman J.e.a., 1983, PRA PROCEDURES GUIDE  
Hughes M, 2013, BUILD RES INF, V41, P156, DOI 10.1080/09613218.2013.769146  
Kavgic M, 2010, BUILD ENVIRON, V45, P1683, DOI 10.1016/j.buildenv.2010.01.021  
Lane DA, 2005, J EVOL ECON, V15, P3, DOI 10.1007/s00191-004-0227-7  
Lloyd S., 1982, IEEE T INFORM THEORY, V28, P129, DOI DOI 10.1109/TIT.1982.1056489  
Lorimer S.W., 2010, 1 INT C CENTR EUR SU  
McCloughlin A., 2014, INFORMAL CONVERSATIO  
Newcastle City Council, WARM UP N  
Openshaw S, 1984, MODIFIABLE AREAL UNI  
Cooper I, 2012, UK HOUSING ENERGY FA  
Rafferty A., 2011, INTRO COMPLEX SAMPLE  
Rao JNK., 2003, SMALL AREA ESTIMATIO  
Redgrove Z., 2012, NATL HEAT MAP MODELL  
Sui DZ, 2004, ANN ASSOC AM GEOGR, V94, P269, DOI 10.1111/j.1467-8306.2004.09402003.x  
Swan LG, 2009, RENEW SUST ENERG REV, V13, P1819, DOI 10.1016/j.rser.2008.09.033  
Triantakontantis DP, 2009, LECT NOTES COMPUT SC, V5592, P221, DOI 10.1007/978-3-642-02454-2\_16  
TVERSKY A, 1974, SCIENCE, V185, P1124, DOI 10.1126/science.185.4157.1124  
U. Government, 2010, ENGL HOUS SURV HOUS  
U. Government, 2014, SUBN CONS STAT METH  
U. Government, 2012, ENGL HOUS SURV HOM 2  
U. Government, 2013, NAT EN EFF DAT FRAM  
Government U., 2010, CAMBR HOUS MOD US GU  
U. Government, 2009, MIDDL LAYER SUP OUTP  
W.S.U. WSU, 2007, BUILD AR MEAS
- NR 38  
TC 12  
Z9 12  
U1 2  
U2 12  
PU ELSEVIER SCIENCE SA

PI LAUSANNE  
PA PO BOX 564, 1001 LAUSANNE, SWITZERLAND  
SN 0378-7788  
EI 1872-6178  
J9 ENERGBUILDINGS  
JI Energy Build.  
PD JUN 1  
PY 2015  
VL 96  
BP 236  
EP 250  
DI 10.1016/j.enbuild.2015.03.029  
PG 15  
WC Construction & Building Technology; Energy & Fuels; Engineering, Civil  
SC Construction & Building Technology; Energy & Fuels; Engineering  
GA CL8JZ  
UT WOS:000357222300022  
DA 2018-05-03  
ER

PT J  
AU Berry, S  
    Whaley, D  
    Davidson, K  
    Saman, W  
AF Berry, Stephen  
    Whaley, David  
    Davidson, Kathryn  
    Saman, Wasim

TI Near zero energy homes - What do users think?

SO ENERGY POLICY

LA English

DT Article

DE Building energy policy; Zero energy homes; Building monitoring; Energy efficiency; Thermal comfort

ID RANDOMIZED COMMUNITY TRIAL; THERMAL COMFORT; HEALTH; PERFORMANCE; ENVIRONMENT; BUILDINGS; MORBIDITY; AUSTRALIA; MORTALITY; BENEFITS

AB With policy directions firmly moving towards net zero energy homes, what do we know about the perceptions and experiences of households who already live in homes at or near that standard? The research sets out to determine whether householders believe these buildings are thermally comfortable, and if they feel confident operating the smart technologies that help achieve the net zero energy outcome? Combining interviews from 25 households and monitored energy data from over 50 near zero energy homes, this paper examines the validity of this policy goal from the building user perspective. The evidence shows households attain high levels of thermal comfort, enjoy lower energy bills, and believe their behaviour has been influenced by the building and its energy systems. Yet many remain concerned that the building industry is unable to produce homes that maintain thermal comfort in all spaces and all seasons. The residents have also identified significant issues in the reliability and usability of the energy technologies. Whilst the policy appears valid from the end-user perspective, the case study highlights the substantial task ahead for policy makers to establish suitable commissioning and compliance processes, and develop effective energy rating tools on the path to zero energy homes. (C) 2014 Elsevier Ltd. All rights reserved.

C1 [Berry, Stephen; Whaley, David; Davidson, Kathryn; Saman, Wasim] Univ S Australia, Barbara Hardy Inst, Adelaide, SA 5095, Australia.

RP Berry, S (reprint author), Univ S Australia, Barbara Hardy Inst, GPO Box 2471, Adelaide, SA 5001, Australia.

EM bersr01f@mymail.unisa.edu.au

RI Whaley, David/F-4440-2013; Davidson, Kathryn/F-3769-2013; Saman, Wasim/A-3984-2008; Berry, Stephen/F-3703-2015



- OI Whaley, David/0000-0002-3660-5146; Davidson, Kathryn/0000-0003-3521-3535; Saman, Wasim/0000-0001-9732-5597; Berry, Stephen/0000-0003-2492-450X
- FU CSIRO's Intelligent Grid Cluster; Renewal SA
- FX The authors wish to acknowledge the funding and support provided by the CSIRO's Intelligent Grid Cluster. They would also like to thank the support and information provided by Renewal SA, in particular Andrew Bishop and Phil Donaldson. Finally, the authors also wish to thank Dr Anne Sharp, University of South Australia, for her valuable advice and assistance in shaping the Lochiel Park residents' interview design.
- CR ASHRAE, 2010, 55 2010 THERM ENV CO  
 Australian Building Codes Board, 2006, PROP AM BCA INC EN E  
 Australian Bureau of Statistics, 2010, BUILD APPR 8731 0  
 Australian Greenhouse Office, 2000, EN RES BUILD COD AUS  
 Australian Greenhouse Office, 1999, AUSTR RES BUILD SECT  
 Berry S., 2013, WORLD REN EN C PERTH, P14  
 Berry S, 2014, ENERG EFFIC, V7, P303, DOI 10.1007/s12053-013-9225-7  
 Berry S, 2013, ENERG POLICY, V62, P646, DOI 10.1016/j.enpol.2013.07.067  
 Bi P., 2011, J PUBLIC HLTH, V23, p27S  
 Butti K, 1980, GOLDEN THREAD 2500 Y  
 Chapman R, 2009, J EPIDEMIOLOG COMMUN H, V63, P271, DOI 10.1136/jech.2007.070037  
 Chappells H, 2005, BUILD RES INF, V33, P32, DOI 10.1080/0961321042000322762  
 Darby S, 2010, BUILD RES INF, V38, P442, DOI 10.1080/09613218.2010.492660  
 de Dear R, 2001, INT J BIOMETEOROL, V45, P100, DOI 10.1007/s004840100093  
 Dear de RJ, 1998, ASHRAE T, V104, P145  
 Department of Climate Change and Energy Efficiency, 2010, REP PRIM MIN TASK GR  
 Department of Communities and Local Government, 2006, BUILD GREEN FUT ZERO  
 Department of the Environment Water Heritage and the Arts, 2008, EN US AUSTR RES SEC  
 Edwards J, 2011, COMFORT CONVENIENCE  
 Fanger P. O., 1970, THERMAL COMFORT ANAL  
 Gilbertson J, 2006, SOC SCI MED, V63, P946, DOI 10.1016/j.socscimed.2006.02.021  
 Gill ZM, 2011, ENERG BUILDINGS, V43, P117, DOI 10.1016/j.enbuild.2010.08.025  
 Hansen A, 2008, ENVIRON HEALTH PERSP, V116, P1369, DOI 10.1289/ehp.11339  
 Havenith G, 2002, ENERG BUILDINGS, V34, P581, DOI 10.1016/S0378-7788(02)00008-7  
 Heinze M, 2009, J GREEN BUILD, V4, P93, DOI 10.3992/jgb.4.4.93  
 Hodge J., 2009, BEDZED 7 YEARS  
 Isaksson C, 2006, BUILD ENVIRON, V41, P1678, DOI 10.1016/j.buildenv.2005.06.022  
 Janda K, 2008, IMPR EN EFF COMM BUI  
 Janda KB, 2011, ARCHIT SCI REV, V54, P15, DOI 10.3763/asre.2009.0050  
 Kapsalaki M, 2011, ADV BUILD ENERGY RES, V5, P129, DOI 10.1080/17512549.2011.582352  
 Land Management Corporation, 2009, LOCH PARK URB DES GU  
 Leech JA, 2004, INDOOR AIR, V14, P169, DOI 10.1111/j.1600-0668.2004.00212.x  
 Liddell C, 2010, ENERG POLICY, V38, P2987, DOI 10.1016/j.enpol.2010.01.037  
 Lovell H, 2009, ENVIRON PLANN C, V27, P491, DOI 10.1068/c0878j  
 Marmot M., 2011, HLTH IMPACTS COLD HO  
 Matthews B., 2010, RES METHODS PRACTICA  
 Miller W, 2012, BUILD ENVIRON, V56, P57, DOI 10.1016/j.buildenv.2012.02.023  
 Miller W, 2012, SOL ENERGY, V86, P231, DOI 10.1016/j.solener.2011.09.028  
 Mlecnik E, 2012, ENERG BUILDINGS, V49, P471, DOI 10.1016/j.enbuild.2012.02.045  
 Musall E, 2010, EUROSUN 2010 INT C S  
 NatHERS National Administrator, 2010, NATHERS NAT HOUS EN  
 Nicol JF, 2002, ENERG BUILDINGS, V34, P563, DOI 10.1016/S0378-7788(02)00006-3  
 Nitschke M, 2007, MED J AUSTRALIA, V187, P662  
 Oliphant M, 2004, INNER CITY RESIDENTI  
 Parker DS, 2009, ENERG BUILDINGS, V41, P512, DOI 10.1016/j.enbuild.2008.11.017  
 Preval N, 2010, ENERG POLICY, V38, P3965, DOI 10.1016/j.enpol.2010.03.020  
 Productivity Commission, 2004, REF BUILD REG  
 Research for Energy Optimized Building, 2013, INT PROJ CARB NEUTR

Rudge J, 2007, ENER G BUILDINGS, V39, P847, DOI 10.1016/j.enbuild.2007.02.007  
 Saman W., 2013, FRAMEWORK ADAPTATION  
 Saman W., 2008, STUDY EFFECT TEMPERA  
 Saman W, 2011, ASSESSMENT ELECT DIS  
 Saman W., 2011, SUSTAINABLE HOUSING  
 Saman W. Y., 2011, INTELLIGENT GRID NEW  
 Saniotis A, 2009, AUST HEALTH REV, V33, P611, DOI 10.1071/AH090611  
 Sartori I, 2012, ENER G BUILDINGS, V48, P220, DOI 10.1016/j.enbuild.2012.01.032  
 Schweitzer M, 2003, APPL ENER G, V76, P321, DOI 10.1016/S0306-2619(03)00003-5  
 Stoecklein A., 2007, P AM COUNC EN EFF EC  
 Stoecklein A., 2005, ANZSEE C PALM N NZ D  
 Summerfield AJ, 2010, BUILD RES INF, V38, P42, DOI 10.1080/09613210903262512  
 Szokolay S., 2005, CEILING FANS THEIR E  
 Urge-Vorsatz D., 2009, ECEEE SUMMER STUDY  
 Vaneckova P, 2008, ENVIRON RES, V108, P361, DOI 10.1016/j.envres.2008.07.015  
 Victorian Auditor-General, 2011, COMPL BUILD PERM  
 Whaley D, 2013, EN EFF DOM APPL LIGH  
 Wilkenfeld G., 2004, NATL DEMAND MANAGEME

NR 66

TC 12

Z9 12

U1 0

U2 39

PU ELSEVIER SCI LTD

PI OXFORD

PA THE BOULEVARD, LANGFORD LANE, KIDLINGTON, OXFORD OX5 1GB, OXON, ENGLAND

SN 0301-4215

EI 1873-6777

J9 ENER G POLICY

J1 Energy Policy

PD OCT

PY 2014

VL 73

BP 127

EP 137

DI 10.1016/j.enpol.2014.05.011

PG 11

WC Economics; Energy & Fuels; Environmental Sciences; Environmental Studies

SC Business & Economics; Energy & Fuels; Environmental Sciences & Ecology

GA AO6PN

UT WOS:000341474100014

DA 2018-05-03

ER

PT J

AU Pan, JL

Jain, R

Paul, S

AF Pan, Jianli

Jain, Raj

Paul, Subharthi

TI A Survey of Energy Efficiency in Buildings and Microgrids using

Networking Technologies

SO IEEE COMMUNICATIONS SURVEYS AND TUTORIALS

LA English

DT Article

DE Intelligent buildings; energy efficiency; microgrids; building

automation; sustainability; smart homes; smart phones; cloud computing;

Internet

ID HOME; SYSTEMS; EVOLUTION

AB Intelligent buildings and microgrids are important parts of the future smart grid. The adoption and development process of the intelligent buildings has been slow. There are multiple technical and non-technical reasons. However, two recent trends have accelerated the research and application of the technologies related to this area. First, skyrocketing energy price and the global need for reducing fossil oil consumption for environmental sustainability combined with the fact that buildings are a significant source of energy consumption, making buildings intelligent and energy efficient will have huge impacts on the total CO<sub>2</sub> emission and hence global sustainability. Second, rapid popularity and maturation of mobile smart phone technology and Internet technologies like cloud computing enable smart phone holders to be aware of their energy consumption and participate in controlling and running their buildings with seamless Internet connections. Cloud computing enables active interactions between the consumer-side (buildings) and the provider-side (smart grids). Hence, combining energy efficiency and networking perspectives, in this paper, we investigate the key research topics through a broad survey on the latest developments in intelligent buildings and our vision of microgrids formed by such buildings. Our aim is to draw an overall picture of the current research and potential future applications. Moreover, we further summarize and discuss in detail a series of key issues and trends that can potentially motivate and impact the adoption and development of the intelligent building and microgrid technologies in the near future.

C1 [Pan, Jianli; Jain, Raj; Paul, Subharthi] Washington Univ, Dept Comp Sci & Engr, St Louis, MO 63130 USA.

RP Pan, JL (reprint author), Washington Univ, Dept Comp Sci & Engr, St Louis, MO 63130 USA.

EM jp10@cse.wustl.edu; jain@cse.wustl.edu; pauls@cse.wustl.edu

RI Paul, Subharthi/D-3297-2015

CR Arslan H., 2006, ULTRAWIDEBAND WIRELE

Atzori L, 2010, COMPUTER NETWORKS EL, V54

Barker S., 2012, P WORKSH DAT MIN APP

Barker S., 2012, P 10 IEEE INT C PERV

Basak P, 2012, RENEW SUST ENERG REV, V16, P5545, DOI 10.1016/j.rser.2012.05.043

Benjamin K, 2008, IEEE POWER ENERGY M, V6, P41

Borstein J., 2008, IN HOME DISPLAY UN 1

Bray J., 2001, BLUETOOTH 1 1 CONNEC

Brush A. J. Bernheim, 2011, P ACM C HUM FACT COM

Continental Automated Building Association (CABA), BRIGHT GREEN BUILD

Continental Automated Building Association (CABA), N AM INT BUILD ROADM

Cao Y, 2012, IEEE T PARALL DISTR, V23, P1572, DOI 10.1109/TPDS.2012.126

Chen CL, 2010, IEEE T POWER ELECTR, V25, P6, DOI 10.1109/TPEL.2009.2025864

Chen J., 2006, P IEEE 27 INT C ENG

Chetty M, 2007, LECT NOTES COMPUT SC, V4717, P127

Commercial Building Automation Systems, RES REP RES

[Anonymous], 1997, TIA232F

Dargie W., 2010, FUNDAMENTALS WIRELES

Dixon C., 2010, P 9 ACM HOT TOP NETW

Technology E. A., 2004, REV EL EN STOR TECHN

Echelon Corporation, LONTALK PROT SPEC VE

Egevang K., 1994, 1631 IETF RFC

Lampe Lutz, 2010, POWER LINE COMMUNICA

Finley Jr M. R., 1991, IEEE COMMUN MAG

Galvin Electricity Initiative, 2010, MICR CRIT COMP US EN

Gao G., 2009, P 1 ACM WORKSH EMB S

Gellings CW, 2009, SMART GRID ENABLING

Glisic S. G., 2006, ADV WIRELESS NETWORK

Grinter RE, 2009, ACM T COMPUT-HUM INT, V16, DOI 10.1145/1534903.1534905

Hatziargyriou N, 2007, IEEE POWER ENERGY MA

Hoff TE, 1998, PROCEEDINGS OF THE 1998 AMERICAN SOLAR ENERGY SOCIETY ANNUAL

CONFERENCE, P225

HomePlug Powerline Alliance, 2005, HOMEPLUG AV WHIT PAP

Hootman T, 2013, NET ZERO ENERGY DESI

Hossain E., 2012, SMART GRID COMMUNICA

[Anonymous], 2007, 80211 IEEE SA  
 Intille S. S., 2002, IEEE Pervasive Computing, V1, P76, DOI 10.1109/MPRV.2002.1012340  
 Irwin D., 2011, P 3 ACM WORKSH EMB S  
 Ito Y., 1740, P 4 INT POW EL MOT C, V3  
 JAMSA K., 2012, CLOUD COMPUTING  
 Jiang X., 2009, P 7 ACM C EMB NETW S  
 Kastner W., 2005, P IEEE, V93, P1178, DOI 10.1109/JPROC.2005.849726  
 Katiraei F., 2008, IEEE POWER ENERGY MA  
 Kietz J., 2008, P ACM C HUM FACT COM, P3675  
 Kim T., 2010, P HOT TOP SEC HOTSEC  
 Korhonen I., 2003, IEEE ENG MED BIOL, V22, P66, DOI 10.1109/MEMB.2003.1213628  
 Koskela T., 2004, PERS UBIQUIT COMPUT, V8, P234, DOI 10.1007/s00779-004-0283-x  
 Lasseter R., 2002, CERTS CONSORTIUM ELE  
 Lasseter RH, 2004, IEEE POWER ELECTRON, P4285  
 Lasseter R. H., 2004, P 35 IEEE POW EL SPE  
 Le T. M., 2009, P IEEE BIOM CIRC SYS  
 Li XJ, 2007, 2007 IEEE LAUSANNE POWERTECH, VOLS 1-5, P2000, DOI 10.1109/PCT.2007.4538625  
 Liang H, 2012, IEEE INFOCOM SER, P1674, DOI 10.1109/INFOCOM.2012.6195538  
 Lidula NWA, 2011, RENEW SUST ENERG REV, V15, P186, DOI 10.1016/j.rser.2010.09.041  
 Lu J., 2010, P 8 ACM C EMB NETW S, P211, DOI DOI 10.1145/1869983.1870005  
 Marnay C., 2006, P IEEE POW ENG SOC G, P18  
 Marszal A. J., 2010, ENERG BUILDINGS, V43, P971  
 Mazurek ML, 2010, CHI2010: PROCEEDINGS OF THE 28TH ANNUAL CHI CONFERENCE ON HUMAN FACTORS IN COMPUTING SYSTEMS, VOLS 1-4, P645  
 Microgrid Hub, 2012, GALV EL IN  
 Microsoft Research, HOMEOS EN SMART HOM  
 Mishra A. A., 2012, P 3 INT C FUT EN SYS  
 National Institute of Standards and Technology (NIST), 1995, LIF CYCL COST MAN FE  
 Oksman V., IEEE COMMUN MAG, V47, P138  
 Pan J., 2013, P IEEE WORLD C SUST  
 Pan J., 2012, P IEEE ENERGYTECH MA  
 Pan J., 2013, P IEEE EN MAY  
 Pan J., REFERENCE LIST BUILD  
 Pan J., ENERGY EFFI IN PRESS  
 Pareto Energy, 2010, BRIEF EN IMPR DISTR  
 Planas E, 2013, RENEW SUST ENERG REV, V17, P147, DOI 10.1016/j.rser.2012.09.032  
 Poole Erika Shehan, 2008, P 7 ACM C DES INT SY, P455, DOI DOI 10.1145/1394445.1394494  
 Randall D, 2003, INSIDE SMART HOME, P227, DOI DOI 10.1007/1-85233-854-7\_12  
 Rode Jennifer A., 2005, P CHI 2005, P1757  
 Sels T., 2001, POW GEN SUST DEV INT, P215  
 Shehan E, 2007, CONFERENCE ON HUMAN FACTORS IN COMPUTING SYSTEMS, VOLS 1 AND 2, P547  
 Sim F, 2010, USING MOORES LAW MAK  
 SINGHVI V, 2005, P 3 INT C EMB NETW S  
 SUMITA J, 2007, IEEE T PE, V127, P145  
 Tanenbaum A., 2003, COMPUTER NETWORKS  
 Tolmie P., 2007, P EUR C COMP SUPP CO, P331  
 Torcellini P., 2006, ZERO ENERGY BUILDING  
 U.S. Department of Energy, ENERGYPLUS EN SIM SO  
 United States Environment Protection Agency (EPA), GREEN BUILD  
 Wang S., 2009, INTELLIGENT BUILDING  
 Yudelson J., 2008, GREEN BUILDING REVOL  
 Zhu T., 2011, P 3 ACM WORKSH EMB S  
 ZIMMERMANN H, 1980, IEEE T COMMUN, V28, P425, DOI 10.1109/TCOM.1980.1094702  
 [Anonymous], 2008, ASS DEM RESP ADV MET

NR 87

TC 12

Z9 12

U1 4  
 U2 20  
 PU IEEE-INST ELECTRICAL ELECTRONICS ENGINEERS INC  
 PI PISCATAWAY  
 PA 445 HOES LANE, PISCATAWAY, NJ 08855-4141 USA  
 SN 1553-877X  
 J9 IEEE COMMUN SURV TUT  
 JI IEEE Commun. Surv. Tutor.  
 PY 2014  
 VL 16  
 IS 3  
 BP 1709  
 EP 1731  
 DI 10.1109/SURV.2014.060914.00089  
 PG 23  
 WC Computer Science, Information Systems; Telecommunications  
 SC Computer Science; Telecommunications  
 GA AQ8JQ  
 UT WOS:000343072200026  
 DA 2018-05-03  
 ER

PT J

AU Lewandowska, A

Noskowiak, A

Pajchrowski, G

AF Lewandowska, Anna

Noskowiak, Andrzej

Pajchrowski, Grzegorz

TI Comparative life cycle assessment of passive and traditional residential buildings' use with a special focus on energy-related aspects

SO ENERGY AND BUILDINGS

LA English

DT Article

DE Energy consumption; Environmental impact; Buildings

ID LCA; CONSTRUCTION; METHODOLOGY

AB This article presents the results of the research project financed by the Polish Ministry of Science and Higher Education (N N309 078138) and coordinated by the Wood Technology Institute in Poznan. A key point of this project was LCA study performed for four detached single-family dwellings with a particular emphasis on the use stage. The life-cycle assessment involved various types of activity made within a hundred years of use and related to: operation (energy and water consumption), replacements and repairs, renovations and maintenance, land occupation, waste transport and waste management. Two of the four analyzed buildings met passive house standards and their energy demands in the use stage were several times lower than those of their conventional counterparts. The aim of the studies was to demonstrate whether lower nominal energy consumption is sufficient to get the best results of the environmental impact of passive buildings, or whether a type of energy used to cover the demand also plays an important role. (C) 2013 Elsevier B.V. All rights reserved.

C1 [Lewandowska, Anna] Poznan Univ Econ, Fac Comm Sci, PL-61875 Poznan, Poland.

[Noskowiak, Andrzej; Pajchrowski, Grzegorz] Wood Technol Inst, PL-60654 Poznan, Poland.

RP Lewandowska, A (reprint author), Poznan Univ Econ, Fac Comm Sci, Al Niepodleglosci 10, PL-61875 Poznan, Poland.

EM anna.lewandowska@ue.poznan.pl

CR Adalberth K., 2001, INT J LOW ENERGY SUS, V2, P1

Asif M, 2007, BUILD ENVIRON, V42, P1391, DOI 10.1016/j.buildenv.2005.11.023

Birgisdottir H, 2006, TRANSPORT RES D-TR E, V11, P358, DOI 10.1016/j.trd.2006.07.001

Blengini GA, 2010, INT J LIFE CYCLE ASS, V15, P652, DOI 10.1007/s11367-010-0190-5

Bukowski M., 2011, ENERGY MIX 2050 SCEN

Dylewski R, 2011, BUILD ENVIRON, V46, P2615, DOI 10.1016/j.buildenv.2011.06.023

Erlandsson M, 2003, BUILD ENVIRON, V38, P919, DOI 10.1016/S0360-1323(03)00031-3  
 Feist W., 2006, BASICS PASSIVE HOUSING  
 Goedkoop M., 2000, ECOINDICATOR 99 DAMA  
 Gorzynski J., 2007, ENV ANAL PRODUCTS BU  
 Guinee J.B., 2002, HDB LIFE CYCLE ASSES  
 [Anonymous], 2006, 14040 ISO  
 ISO, 2006, 14044 ISO  
 Joliet O, 2003, INT J LIFE CYCLE ASS, V8, P324, DOI 10.1007/BF02978505  
 Kellenberger D, 2009, BUILD ENVIRON, V44, P818, DOI 10.1016/j.buildenv.2008.06.002  
 Kofoworola OF, 2008, INT J LIFE CYCLE ASS, V13, P498, DOI 10.1007/s11367-008-0012-1  
 Kotaji S., 2003, LIFE CYCLE ASSESSMEN  
 [Anonymous], 2011, VAD GREEN BUILD POL  
 Lewandowska A., 2012, ENV LIFE CYCLE ASSES  
 Mroueh UM, 2001, WASTE MANAGE, V21, P271, DOI 10.1016/S0956-053X(00)00100-8  
 Ortiz O, 2009, CONSTR BUILD MATER, V23, P28, DOI 10.1016/j.conbuildmat.2007.11.012  
 Ortiz-Rodriguez O, 2010, SCI TOTAL ENVIRON, V408, P2435, DOI 10.1016/j.scitotenv.2010.02.021  
 Peuportier BLP, 2001, ENERG BUILDINGS, V33, P443, DOI 10.1016/S0378-7788(00)00101-8  
 Demand for fuels and energy, 2009, DEM FUELS EN PROJ DE  
 Stripple H, 2010, B1943 IVL  
 Wnuk R, 2006, PASSIVE HOUSING PRAC  
 World Commission on Environment and Development, 1987, OUR COMMON FUTURE  
 [Anonymous], 2012, MUN INFR 2011 REP PO  
 NR 28  
 TC 12  
 Z9 12  
 U1 1  
 U2 32  
 PU ELSEVIER SCIENCE SA  
 PI LAUSANNE  
 PA PO BOX 564, 1001 LAUSANNE, SWITZERLAND  
 SN 0378-7788  
 EI 1872-6178  
 J9 ENERG BUILDINGS  
 JI Energy Build.  
 PD DEC  
 PY 2013  
 VL 67  
 BP 635  
 EP 646  
 DI 10.1016/j.enbuild.2013.09.002  
 PG 12  
 WC Construction & Building Technology; Energy & Fuels; Engineering, Civil  
 SC Construction & Building Technology; Energy & Fuels; Engineering  
 GA 267JN  
 UT WOS:000328094000065  
 DA 2018-05-03  
 ER  
  
 PT J  
 AU Muller, L  
     Berker, T  
 AF Mueller, Liana  
     Berker, Thomas  
 TI Passive House at the crossroads: The past and the present of a voluntary  
    standard that managed to bridge the energy efficiency gap  
 SO ENERGY POLICY  
 LA English  
 DT Article

DE Passive House; Technological innovation; Immutable mobile  
ID BARRIERS; TECHNOLOGY; PARADOX; HOME

AB Improving energy efficiency in dwellings is generally seen as the low-hanging fruit of climate change mitigation. In particular decreased heat loss through better insulation is suggested as one of the most cost-effective means to achieve the ambitious national and international goals of climate gas reduction. However, the literature shows that a profitable technological solution is not sufficient to reach the energy goals. Aspects such as a lack of information, unobserved costs, and heterogeneity among users can compromise the success of technical innovation. Still, there are successful concepts that drive the technological development in the construction sector. The Passive House is an example for such innovations that manage to bridge the energy efficiency gap. This paper addresses the Passive House concept and standard as a success story of technological innovation. With Bruno Latour's *Science in Action* (1987) as a starting point, we describe the conditions under which the standard was created, the role of the network built around the Passive House Institute, and the consequences of exporting the standard. We identify success factors that have supported the diffusion of the Passive House standard and concept and discuss its possible development in the current situation which is characterized by its wide-spread adoption. (C) 2013 Elsevier Ltd. All rights reserved.

C1 [Mueller, Liana; Berker, Thomas] Norwegian Univ Sci & Technol, Dept Interdisciplinary Studies Culture, Ctr Technol & Soc, NO-7491 Trondheim, Norway.

RP Muller, L (reprint author), Norwegian Univ Sci & Technol, Dept Interdisciplinary Studies Culture, Ctr Technol & Soc, NO-7491 Trondheim, Norway.

EM liana.mueller@ntnu.no; thomas.berker@ntnu.no

OI Berker, Thomas/0000-0002-8117-0700

FU ZEB partners; Research Council of Norway

FX This paper has been written within the Research Centre on Zero Emission Buildings (ZEB). The authors gratefully acknowledge the support from the ZEB partners and the Research Council of Norway.

CR Aune M, 2007, ENER POLICY, V35, P5457, DOI 10.1016/j.enpol.2007.05.007

Busch L, 2011, INFRASTRUCT SER, P1

Chai KH, 2012, ENER POLICY, V46, P460, DOI 10.1016/j.enpol.2012.04.012

Dangel U., 2010, NACHHALTIGE ARCHITEK

Andresen I., 2006, 10 INT PASS HOUS C 2

Fujimura J, 1992, SCI PRACTICE CULTURE, P168

JAFFE AB, 1994, RESOUR ENERGY ECON, V16, P91, DOI 10.1016/0928-7655(94)90001-9

Latour B., 1987, SCI ACTION

McKinsey & Company, 2009, PATHW LOW CARB EC VE

Mlecnik E, 2010, ENER POLICY, V38, P4592, DOI 10.1016/j.enpol.2010.04.015

Muller L., 2012, WORKSH DO YOU MAN UN

Ornetzeder M., 2009, ACT INNOVATE DELIVER, P1531

Perlman R., 1977, FAMILIES ENERGY CRIS

Phillips Y, 2012, ENER POLICY, V45, P112, DOI 10.1016/j.enpol.2012.01.067

Schot J, 2008, TECHNOL ANAL STRATEG, V20, P537, DOI 10.1080/09537320802292651

Shove E, 1998, ENER POLICY, V26, P1105, DOI 10.1016/S0301-4215(98)00065-2

SOrensen Knut H., 2000, UNDERSTANDING TRUST, P237

Stockelova T, 2012, SCI TECHNOL HUM VAL, V37, P286, DOI 10.1177/0162243911415872

Taylor J., 2004, INNOVATIONS PROJECT, P83

van Soest DP, 2001, ENVIRON RESOUR ECON, V18, P101, DOI 10.1023/A:1011112406964

Weber L, 1997, ENER POLICY, V25, P833, DOI 10.1016/S0301-4215(97)00084-0

WILK RR, 1985, ENERGY, V10, P621, DOI 10.1016/0360-5442(85)90093-3

NR 22

TC 12

Z9 12

U1 2

U2 18

PU ELSEVIER SCI LTD

PI OXFORD

PA THE BOULEVARD, LANGFORD LANE, KIDLINGTON, OXFORD OX5 1GB, OXON, ENGLAND

SN 0301-4215

EI 1873-6777

J9 ENER POLICY

J1 Energy Policy

PD SEP

PY 2013

VL 60

BP 586

EP 593

DI 10.1016/j.enpol.2013.05.057

PG 8

WC Economics; Energy & Fuels; Environmental Sciences; Environmental Studies

SC Business & Economics; Energy & Fuels; Environmental Sciences & Ecology

GA 206OB

UT WOS:000323530900059

DA 2018-05-03

ER

PT J

AU Fuerst, F

van de Wetering, J

Wyatt, P

AF Fuerst, Franz

van de Wetering, Jorn

Wyatt, Peter

TI Is intrinsic energy efficiency reflected in the pricing of office leases?

SO BUILDING RESEARCH AND INFORMATION

LA English

DT Article

DE commercial offices; eco-labelling; energy efficiency; Energy Performance

Certificate; hedonic modelling; rental premium; rental values

ID TECHNOLOGY; PARADOX; MARKET; LABELS; IMPACT; GAP

AB This paper investigates whether the intrinsic energy efficiency rating of an office building has a significant impact on its rental value. A sample of 817 transactions for offices with Energy Performance Certificates (EPCs) in the UK is used to assess whether a pricing differential can be identified, depending on the energy rating. While previous analyses of this topic have typically relied on appraisal-based and/or asking rent data, the dataset used in this research contains actual contract rents as well as information on lease terms. The results indicate a significant rental premium for energy-efficient buildings. However, it is found that this premium appears to be mainly driven by the youngest cohort of state-of-the-art energy-efficient buildings. The results also show that tenants of more energy-efficient buildings tend to pay a lower service charge, but this link appears to be rather weak and limited to newer buildings. Hence, it is argued that the information contained in the EPC is still not fully taken into account in the UK commercial property market with the possible exception of both the highest and the lowest EPC ratings.

C1 [Fuerst, Franz] Univ Cambridge, Dept Land Econ, Cambridge CB3 9EP, England.

[van de Wetering, Jorn; Wyatt, Peter] Univ Reading, Sch Real Estate & Planning, Henley Business Sch, Reading RG6 6AW, Berks, England.

RP Fuerst, F (reprint author), Univ Cambridge, Dept Land Econ, 19 Silver St, Cambridge CB3 9EP, England.

EM ff274@cam.ac.uk; J.T.VanDeWetering@pgr.reading.ac.uk;

p.wyatt@reading.ac.uk

CR Allcott H, 2012, J ECON PERSPECT, V26, P3, DOI 10.1257/jep.26.1.3

Brounen D, 2011, J ENVIRON ECON MANAG, V62, P166, DOI 10.1016/j.jeem.2010.11.006

Chegut A., 2012, SUPPLY DEMAND VALUE

Davies R., 2005, GREEN VALUE GREEN BU

DCLG, 2008, IMPR EN EFF OUR BUIL

Eichholtz P, 2010, AM ECON REV, V100, P2492, DOI 10.1257/aer.100.5.2492

European Commission, 2010, EN PERF BUILD

Fuerst F, 2011, ENER POLICY, V39, P6608, DOI 10.1016/j.enpol.2011.08.005

Fuerst F, 2011, REAL ESTATE ECON, V39, P45, DOI 10.1111/j.1540-6229.2010.00286.x

Giles D. E., 2011, WORKING PAPER



Gillingham K, 2012, ENERJ J, V33, P37, DOI 10.5547/01956574.33.2.3  
 HALVORSEN R, 1980, AM ECON REV, V70, P474  
 JAFFE AB, 1994, ENERJ POLICY, V22, P804, DOI 10.1016/0301-4215(94)90138-4  
 Jaffe AB, 2005, ECOL ECON, V54, P164, DOI 10.1016/j.ecolecon.2004.12.027  
 JAFFE AB, 1994, RESOUR ENERGY ECON, V16, P91, DOI 10.1016/0928-7655(94)90001-9  
 Jones Lang LaSalle, 2007, OFFICE OSCAR 2006 SE  
 LaSalle Jones Lang, 2008, NATL AVERAGE COMPONE  
 Kok N, 2012, ENERJ POLICY, V46, P489, DOI 10.1016/j.enpol.2012.04.015  
 Lai RN, 2007, J REAL ESTATE FINANC, V34, P159, DOI 10.1007/s11146-007-9004-3  
 van Soest DP, 2001, ENVIRON RESOUR ECON, V18, P101, DOI 10.1023/A:1011112406964  
 Wiley JA, 2010, J REAL ESTATE FINANC, V41, P228, DOI 10.1007/s11146-008-9142-2

NR 21

TC 12

Z9 12

U1 0

U2 13

PU TAYLOR & FRANCIS LTD

PI ABINGDON

PA 4 PARK SQUARE, MILTON PARK, ABINGDON OX14 4RN, OXON, ENGLAND

SN 0961-3218

J9 BUILD RES INF

JI Build. Res. Informat.

PD AUG 1

PY 2013

VL 41

IS 4

BP 373

EP 383

DI 10.1080/09613218.2013.780229

PG 11

WC Construction & Building Technology

SC Construction & Building Technology

GA 149LQ

UT WOS:000319321600001

DA 2018-05-03

ER

PT J

AU Pellegrini-Masini, G

Leishman, C

AF Pellegrini-Masini, Giuseppe

Leishman, Chris

TI The role of corporate reputation and employees' values in the uptake of energy efficiency in office buildings

SO ENERGY POLICY

LA English

DT Article

DE Office buildings; Energy efficiency; Corporate social responsibility

ID SOCIAL-RESPONSIBILITY; ENVIRONMENTAL-ISSUES; PROPERTY; PERFORMANCE; DRIVERS; SUSTAINABILITY; PERSPECTIVES; BUSINESS; BARRIERS; BEHAVIOR

AB Although office market actors in the United Kingdom show a growing interest in energy efficiency, the pace of takeup of energy efficient office features is slow. Previous studies have highlighted the roles of limited direct financial costs and benefits (efficiency gaps') and market barriers in limiting the rate of technology adoption. This study provides further evidence on the importance of these factors, but the primary contribution is focused on the role of corporate reputation and on the importance of individuals' values in shaping corporate behaviour. The paper presents a theoretical framework to explain environmental decision making in firms and we present qualitative evidence drawing from sixteen semi-structured individual and group interviews with office market stakeholders in London, Glasgow and

Edinburgh. The research finds that companies, despite gradually becoming more energy conscious, still regard energy costs as a negligible part of their business costs. Nevertheless, an increasingly important driver is the reputational gain obtained by corporate businesses implementing sustainable practices. All the interviewees agreed that the pace of change in the office market is slow and that only further policy interventions will accelerate it. (C) 2011 Elsevier Ltd. All rights reserved.

C1 [Pellegrini-Masini, Giuseppe] Heriot Watt Univ, Sch Built Environm, Edinburgh EH14 4AS, Midlothian, Scotland.

[Leishman, Chris] Univ Glasgow, Sch Social & Polit Sci, Glasgow G12 8RS, Lanark, Scotland.

RP Pellegrini-Masini, G (reprint author), Heriot Watt Univ, Sch Built Environm, Chadwick Bldg, Edinburgh EH14 4AS, Midlothian, Scotland.

EM gp89@hw.ac.uk; chris.leishman@glasgow.ac.uk

OI Pellegrini-Masini, Giuseppe/0000-0002-7158-9962; Leishman, Christian/0000-0002-7853-5035

CR Angel DP, 2005, ENVIRON PLANN A, V37, P1903, DOI 10.1068/a3788

Aragon-Correa JA, 2003, ACAD MANAGE REV, V28, P71

Bansal P, 2005, STRATEGIC MANAGE J, V26, P197, DOI 10.1002/smj.441

Bansal P, 2003, ORGAN SCI, V14, P510, DOI 10.1287/orsc.14.5.510.16765

Bansal P, 2000, ACAD MANAGE J, V43, P717, DOI 10.2307/1556363

Bordass B, 2000, BUILD RES INF, V28, P338, DOI 10.1080/096132100418492

Bowen FE, 2002, BRIT J MANAGE, V13, P305, DOI 10.1111/1467-8551.00248

Bowen FE, 2000, BUSINESS STRATEGY EN, V9, P92, DOI DOI 10.1002/(SICI)1099-0836(200003/04)9:2<LESS

BRAMMER S., 2006, BUSINESS ETHICS EURO, V15, P6, DOI DOI 10.1111/J.1467-8608.2006.00424.X

Branco MC, 2006, J BUS ETHICS, V69, P111, DOI 10.1007/s10551-006-9071-z

Brown MA, 2001, ENERG POLICY, V29, P1197, DOI 10.1016/S0301-4215(01)00067-2

CABE, 2005, IMP OFF DES BUS PERF

Carbon Trust, 2007, CARB TRUST LAUNCH CA

\*CARB TRUST, 2005, UK CLIM CHANG PROGR

CBRE, 2009, MARK VIEW CENTR LOND

CBRE, 2007, CIT W END RENT DIFF

DeCanio SJ, 1998, ENERG POLICY, V26, P441, DOI 10.1016/S0301-4215(97)00152-3

DECC, 2009, EN CONS UK

Doane D, 2005, FUTURES, V37, P215, DOI 10.1016/j.futures.2004.03.028

Department of Trade and Industry (DTI), 2007, M EN CHALL WHIT PAP

Epstein MJ, 2001, LONG RANGE PLANN, V34, P585, DOI 10.1016/S0024-6301(01)00084-X

Epstein M.J., 2003, J CORPORATE CITIZENS

Eurobarometer, 2007, ATT ISS REL EU EN PO

Gouldson A, 2008, ENERG POLICY, V36, P4618, DOI 10.1016/j.enpol.2008.09.047

Greening D., 2000, BUS SOC, V3, P254, DOI DOI 10.1177/000765030003900302

Guy S, 2006, ENVIRON PLANN C, V24, P645, DOI 10.1068/c0607j

GVA Grimley, 2007, SUST OFF

GVA Grimley, 2008, GREEN GOLD 2008 UNIQ

Hemingway CA, 2004, J BUS ETHICS, V50, P33, DOI 10.1023/B:BUSI.0000020964.80208.c9

Henriques I, 1996, J ENVIRON ECON MANAG, V30, P381, DOI 10.1006/jeem.1996.0026

HM Government, 2009, UK LOW CARB TRANS PL

Howard-Grenville JA, 2006, ORGAN ENVIRON, V19, P46, DOI 10.1177/1086026605285739

Howarth RB, 2000, ENERG POLICY, V28, P477

IEA, 2006, EN POL IEA COUNTR UK

Lasalle Jones Lang, 2008, OFF OSC 2008 SERV CH

Linnenluecke M.K., 2007, BUSINESS STRATEGY EN

Masurel E., 2007, BUSINESS STRATEGY EN, V16, P190, DOI [DOI 10.1002/(ISSN)1099-0836, DOI 10.1002/BSE.478]

McWilliams A, 2001, ACAD MANAGE REV, V26, P117, DOI 10.5465/AMR.2001.4011987

Miles MP, 2000, J BUS ETHICS, V23, P299, DOI 10.1023/A:1006214509281

Montiel I, 2008, ORGAN ENVIRON, V21, P245, DOI 10.1177/1086026608321329

Newell G, 2008, J PROP INVEST FINANC, V26, P522, DOI 10.1108/14635780810908370

ODPM, 2006, COMM IND FLOORSP RAT

Peterson D. K., 2004, BUSINESS SOC, V43, P296, DOI DOI 10.1177/0007650304268065

Pett J., 2003, P ECEEE 2003 SUMM ST  
 Pivo G, 2008, BUILD RES INF, V36, P20, DOI 10.1080/09613210701574795  
 Pivo G, 2008, CORP SOC RESP ENV MA, V15, P235, DOI 10.1002/csr.165  
 Rigby E., 2007, FINANCIAL TIMES 0119  
 Robson C., 2007, REAL WORLD RES RESOU  
 Npower, 2009, NPOW BUS EN IND 2009  
 Sayce S, 2007, BUILD RES INF, V35, P629, DOI 10.1080/09613210701559515  
 Schiellerup P, 2009, ENVIRON PLANN C, V27, P801, DOI 10.1068/c08102  
 Scrase JI, 2001, BUILD RES INF, V29, P51, DOI 10.1080/09613210010001150  
 Stern PC, 2000, J SOC ISSUES, V56, P407, DOI 10.1111/0022-4537.00175  
 Stern PC, 1999, J CONSUM POLICY, V22, P461, DOI DOI 10.1023/A:1006211709570  
 Stern P.C., 1999, HUMAN ECOLOGY REV, V56, P407  
 Taylor N, 2003, ENVIRON PLANN C, V21, P89, DOI 10.1068/c0219  
 Thøgersen J, 2004, J ENVIRON PSYCHOL, V24, P93, DOI 10.1016/S0272-4944(03)00039-2  
 Thornton A., 2009, PUBLIC ATTITUDES BEH  
 TILLEY F., 1999, BUSINESS STRATEGY EN, V8, P238, DOI DOI 10.1002/(SICI)1099-0836(199907/08)8:4238::AID-BSE1973.0.CO;2-M  
 Turban DB, 1997, ACAD MANAGE J, V40, P658, DOI 10.2307/257057  
 Wade J., 2003, ENERGY EFFICIENT OFF  
 NR 61  
 TC 12  
 Z9 12  
 U1 0  
 U2 18  
 PU ELSEVIER SCI LTD  
 PI OXFORD  
 PA THE BOULEVARD, LANGFORD LANE, KIDLINGTON, OXFORD OX5 1GB, OXON, ENGLAND  
 SN 0301-4215  
 J9 ENER POLICY  
 JI Energy Policy  
 PD SEP  
 PY 2011  
 VL 39  
 IS 9  
 BP 5409  
 EP 5419  
 DI 10.1016/j.enpol.2011.05.023  
 PG 11  
 WC Economics; Energy & Fuels; Environmental Sciences; Environmental Studies  
 SC Business & Economics; Energy & Fuels; Environmental Sciences & Ecology  
 GA 816JJ  
 UT WOS:000294594200072  
 DA 2018-05-03  
 ER  
  
 PT J  
 AU Sahakian, MD  
 AF Sahakian, Marlyne D.  
 TI Understanding household energy consumption patterns: When "West Is Best"  
 in Metro Manila  
 SO ENERGY POLICY  
 LA English  
 DT Article  
 DE Sustainable consumption; Household energy; The Philippines  
 ID PHILIPPINES; ENVIRONMENT  
 AB This paper addresses the topic of energy and development through a multi-disciplinary and systemic approach that combines environmental considerations with a social understanding of consumption. The focus is on electricity usage in the home and specifically lighting and cooling. Set in the urban mega-polis

of Metro Manila, the Philippines, energy consumption is first placed in its biophysical perspective: the energy sources and electricity grid are presented, in relation to the Philippines as well as the region. The research findings then explore the social and cultural drivers behind household electricity consumption, revealing in several examples the strong influence of globalization understood here as the flow of people, remittances, images and ideas. Policy recommendations are provided, based on the research results, with concluding remarks relevant to other similar contexts. (C) 2010 Elsevier Ltd. All rights reserved.

C1 Grad Inst Int & Dev Studies, CH-1207 Geneva, Switzerland.

RP Sahakian, MD (reprint author), Grad Inst Int & Dev Studies, 20 Rue Rothschild, CH-1207 Geneva, Switzerland.

EM marlyne.sahakian@graduateinstitute.ch

FU AAUW

FX The author would like to thank Julia K. Steinberger and Isabelle Schulte-Tenckhoff for their feedback, as well as the anonymous reviewers. This paper was written with the support of an American Fellowship from AAUW.

CR Appadurai Arjun, 1986, CAMBRIDGE STUDIES SO

Appadurai Arjun, 1996, MODERNITY LARGE CULT

Asian Development Bank and Asia Pacific Economic Cooperation, 2009, EN STAT AS PAC 1990

Bank L, 1997, AFRICAN STUDIES, V56, P157

Baudrillard J., 1968, SYSTEME OBJETS

Boden TA., 2009, GLOBAL REGIONAL NATL

Bourdieu Pierre, 1979, DISTINCTION CRITIQUE

Chappells H, 2005, BUILD RES INF, V33, P32, DOI 10.1080/0961321042000322762

Cooper G., 1998, AIR CONDITIONING AM

Douglas Mary, 1979, WORLD GOODS ANTHR CO

ESTOQUE MA, 2000, CLIMATE CHANGES DUE

Fernando H, 2008, CAPTURING KING COAL

Gardner G. T., 2002, ENV PROBLEMS HUMAN B

Gyberg P, 2009, ENER POLICY, V37, P2807, DOI 10.1016/j.enpol.2009.03.043

Hertwich EG, 2005, J IND ECOL, V9, P85, DOI 10.1162/1088198054084635

HEYMAN JM, 1994, HUM ORGAN, V53, P132, DOI 10.17730/humo.53.2.48u23qk420756g08

\*IBON, 2008, FACTS FIGURES SPECIA, V31

IEA, 2009, WORLD ENERGY OUTLOOK

International Energy Agency, 2007, EN BAL NONOECD COUNT

KEARNEY M, 1995, ANNU REV ANTHROPOL, V24, P547, DOI 10.1146/annurev.an.24.100195.002555

Lee R, 2006, J WOMENS HIST, V18, P55, DOI 10.1353/jowh.2006.0051

Lofstrom E, 2008, HOUSING STUD, V23, P935, DOI 10.1080/02673030802425602

Lutzenhiser L, 1999, ENER POLICY, V27, P217, DOI 10.1016/S0301-4215(99)00012-9

Maniates M., 2002, CONFRONTING CONSUMPT

Marvin S., 1999, Computers, Environment and Urban Systems, V23, P109, DOI 10.1016/S0198-9715(99)00011-3

MEHLWANA AM, 1997, ENERGY SUSTAINABLE 3, V5, P5

\*NSO DOE, 2004, HOUS EN CONS SURV FI

\*OFF PRES PHIL COM, 2008, STOCK EST OV FIL DEC

Okeil A, 2010, ENER BUILDINGS, V42, P1437, DOI 10.1016/j.enbuild.2010.03.013

Polanyi K., 1957, TRADE MARKET EARLY E, P243

Quisumbing A, 2010, J DEV STUD, V46, P91, DOI 10.1080/00220380903197960

Sahakian Marlyne D, 2010, Sustainability, V2, P2349, DOI 10.3390/su2072349

Sahakian MD, 2011, J IND ECOL, V15, P31, DOI 10.1111/j.1530-9290.2010.00305.x

Sanne C, 2002, ECOL ECON, V42, P273, DOI 10.1016/S0921-8009(02)00086-1

SATHAYE J, 1991, ANNU REV ENER ENV, V16, P295

Short CA, 2004, BUILD RES INF, V32, P187, DOI 10.1080/09613210410001679875

Shove E, 1998, ENER POLICY, V26, P1105, DOI 10.1016/S0301-4215(98)00065-2

Shove E, 2003, COMFORT CLEANLINESS

\*SSC CDM PDD, 2009, MAK S SEW TREATM PLA

Thavasi V, 2009, ENER POLICY, V37, P4240, DOI 10.1016/j.enpol.2009.05.061

Tyler SR, 1996, ATMOS ENVIRON, V30, P809, DOI 10.1016/1352-2310(94)00353-X  
[Population Division UNDESA], 2010, WORLD URB PROSP 2009

\*UNDP, 2007, HUM DEV REP 2007 200  
Veblen T., 1912, THEORY LEISURE CLASS  
Wilhite H, 1996, ENER POLICY, V24, P795, DOI 10.1016/0301-4215(96)00061-4  
Wilhite Harold, 2008, CONSUMPTION TRANSFOR  
Wilk R, 2002, GLOBAL ENVIRON CHANG, V12, P5, DOI 10.1016/S0959-3780(01)00028-0  
ZACAI E, 2008, SOC CONSOMMATION FAC

NR 48

TC 12

Z9 12

U1 0

U2 7

PU ELSEVIER SCI LTD

PI OXFORD

PA THE BOULEVARD, LANGFORD LANE, KIDLINGTON, OXFORD OX5 1GB, OXON, ENGLAND

SN 0301-4215

J9 ENER POLICY

J1 Energy Policy

PD FEB

PY 2011

VL 39

IS 2

BP 596

EP 602

DI 10.1016/j.enpol.2010.10.032

PG 7

WC Economics; Energy & Fuels; Environmental Sciences; Environmental Studies

SC Business & Economics; Energy & Fuels; Environmental Sciences & Ecology

GA 714BN

UT WOS:000286782000014

DA 2018-05-03

ER

PT J

AU Podgornik, A

Sucic, B

Blazic, B

AF Podgornik, Ales

Sucic, Boris

Blazic, Bostjan

TI Effects of customized consumption feedback on energy efficient behaviour  
in low-income households

SO JOURNAL OF CLEANER PRODUCTION

LA English

DT Article

DE Consumption feedback; Energy behaviour; Low-income households; Smart  
meters; Energy awareness

ID ELECTRICITY CONSUMPTION; DOMESTIC APPLIANCES; INFORMATION; HABITS;  
INDICATORS; RESIDENTS; DESIGN; POLICY; MODEL

AB Smart metering and various consumption-feedback systems can be used as applicable technology to encourage end-use energy efficiency in the residential sector. Many studies have demonstrated the positive influence of socially contextualized feedback on the energy consumption of households, but not many such studies dealt with the specifics of low-income households. This paper evaluates the effect of customized consumption feedback and other information interactions on energy-behaviour patterns and energy savings in low-income households. The experimentation process was accompanied by an interactive awareness campaign, with the emphasis being on a proper understanding of the consumption feedback and other complementary energy services provided to low-income households. The feedback actions were customized to tackle the recognised needs of each specific target household, considering both the social aspects and the typology of the dwelling. The results clearly confirmed the importance of customized

information and efficiency indicators for specific household groups, with a potential to increase knowledge and develop awareness with respect to established habits and their relevance to energy behaviour. (C) 2016 Elsevier Ltd. All rights reserved.

C1 [Podgornik, Ales; Susic, Boris] Jozef Stefan Inst, Energy Efficiency Ctr, Jamova 39, Ljubljana 1000, Slovenia.

[Blazic, Bostjan] Univ Ljubljana, Fac Elect Engrn, Trzaska 25, Ljubljana 1000, Slovenia.

RP Podgornik, A (reprint author), Jozef Stefan Inst, Energy Efficiency Ctr, Jamova 39, Ljubljana 1000, Slovenia.

EM ales.podgornik@ijs.si

FU European Regional Development Fund (ERDF); MED Programme project "ELIH-Med - Energy efficiency in low-income housing in Mediterranean" [1S-MED 10-029]

FX The authors would like to thank the European Regional Development Fund (ERDF) and the partners of the MED Programme project "ELIH-Med - Energy efficiency in low-income housing in Mediterranean" (<http://www.elih-med.eu/>, 1S-MED 10-029) for their support.

CR Abrahamse W, 2005, J ENVIRON PSYCHOL, V25, P273, DOI 10.1016/j.jenvp.2005.08.002

Annala Salla, 2014, Journal of Sustainable Development of Energy, Water and Environment Systems, V2, P51

Beunder A, 2015, J CLEAN PROD, V94, P137, DOI 10.1016/j.jclepro.2015.01.083

Bukarica V, 2013, ENER POLICY, V61, P414, DOI 10.1016/j.enpol.2013.06.052

Caeiro S, 2012, J CLEAN PROD, V27, P72, DOI 10.1016/j.jclepro.2011.12.026

Chen C, 2013, PERVASIVE MOB COMPUT, V9, P161, DOI 10.1016/j.pmcj.2012.10.004

Chiang T, 2012, ENER BUILDINGS, V55, P471, DOI 10.1016/j.enbuild.2012.07.026

Darby S, 2006, EFFECTIVENESS FEEDBA

Desmedt J, 2009, J CLEAN PROD, V17, P455, DOI 10.1016/j.jclepro.2008.08.017

EC, 2006, EUR UN EUR COMM COMM

Eisenhardt KM, 2007, ACAD MANAGE J, V50, P25, DOI 10.5465/AMJ.2007.24160888

ELIH-Med, 2010, 3677 ELIH MED STC PR

Elliott N, 2012, DEFINING FRAMEWORK I

Faruqui A, 2010, ENERGY, V35, P1598, DOI 10.1016/j.energy.2009.07.042

Firth S, 2008, ENER BUILDINGS, V40, P926, DOI 10.1016/j.enbuild.2007.07.005

Fischer C, 2008, ENER EFFIC, V1, P79, DOI 10.1007/s12053-008-9009-7

Gillingham K., 2009, NBER WORKING PAPER S

Gynther L, 2012, ENER EFFIC, V5, P67, DOI 10.1007/s12053-011-9115-9

HAYES SC, 1977, J APPL BEHAV ANAL, V10, P425, DOI 10.1901/jaba.1977.10-425

Jonsson DK, 2011, ENER EFFIC, V4, P355, DOI 10.1007/s12053-010-9103-5

Kang NN, 2012, ENER BUILDINGS, V46, P112, DOI 10.1016/j.enbuild.2011.10.039

Kavousian A, 2013, ENERGY, V55, P184, DOI 10.1016/j.energy.2013.03.086

Langevin J, 2013, APPL ENER, V102, P1358, DOI 10.1016/j.apenergy.2012.07.003

Lapillonne Bruno, 2013, ENERGY EFFICIENCY TR

Levine M., 2007, CLIMATE CHANGE 2007

Lopes MAR, 2012, RENEW SUST ENER REV, V16, P4095, DOI 10.1016/j.rser.2012.03.034

Marechal K, 2010, ECOL ECON, V69, P1104, DOI 10.1016/j.ecolecon.2009.12.004

Marechal K, 2009, J ECON ISSUES, V43, P69, DOI 10.2753/JEI0021-3624430104

Matthies E., 2005, UMWELTPSYCHOLOGIE, V9, P62

Mazur-Stommen S., 2013, TRUSTED PARTNERS EVE

Nadel S., 2012, REBOUND EFFECT LARGE

Ouyang JL, 2009, ENER BUILDINGS, V41, P711, DOI 10.1016/j.enbuild.2009.02.003

Rodriguez-Barreiro LM, 2013, J CLEAN PROD, V48, P116, DOI 10.1016/j.jclepro.2012.09.029

Shin D, 2008, J CLEAN PROD, V16, P1823, DOI 10.1016/j.jclepro.2008.06.006

Ueno T, 2006, APPL ENER, V83, P166, DOI 10.1016/j.apenergy.2005.02.002

Urge-Vorsatz D, 2009, ENER EFFIC, V2, P293, DOI 10.1007/s12053-009-9051-0

Vassileva I, 2012, APPL ENER, V90, P182, DOI 10.1016/j.apenergy.2011.05.031

Verplanken B, 2006, J PUBLIC POLICY MARK, V25, P90, DOI 10.1509/jppm.25.1.90

Wilson C, 2007, ANNU REV ENV RESOUR, V32, P169, DOI 10.1146/annurev.energy.32.053006.141137

Wood G, 2003, ENER BUILDINGS, V35, P821, DOI 10.1016/S0378-7788(02)00241-4

Wood W, 2005, J PERS SOC PSYCHOL, V88, P918, DOI 10.1037/0022-3514.88.6.918

NR 41  
TC 11  
Z9 11  
U1 1  
U2 31  
PU ELSEVIER SCI LTD  
PI OXFORD  
PA THE BOULEVARD, LANGFORD LANE, KIDLINGTON, OXFORD OX5 1GB, OXON, ENGLAND  
SN 0959-6526  
EI 1879-1786  
J9 J CLEAN PROD  
JI J. Clean Prod.  
PD SEP 1  
PY 2016  
VL 130  
BP 25  
EP 34  
DI 10.1016/j.jclepro.2016.02.009  
PG 10  
WC GREEN & SUSTAINABLE SCIENCE & TECHNOLOGY; Engineering, Environmental;  
Environmental Sciences  
SC Science & Technology - Other Topics; Engineering; Environmental Sciences  
& Ecology  
GA DQ7FB  
UT WOS:000379371200003  
DA 2018-05-03  
ER

PT J  
AU Wu, Z  
Wang, B  
Xia, XH  
AF Wu, Zhou  
Wang, Bo  
Xia, Xiaohua  
TI Large-scale building energy efficiency retrofit: Concept, model and  
control  
SO ENERGY  
LA English  
DT Article  
DE Building retrofit; Energy efficiency; Optimal planning; Net present  
value; Control  
ID MULTIOBJECTIVE OPTIMIZATION; NEIGHBORHOOD FIELD; METHODOLOGY;  
STRATEGIES; SYSTEM

AB BEER (Building energy efficiency retrofit) projects are initiated in many nations and regions over the world. Existing studies of BEER focus on modeling and planning based on one building and one year period of retrofitting, which cannot be applied to certain large BEER projects with multiple buildings and multi-year retrofit. In this paper, the large-scale BEER problem is defined in a general TBT (time-building technology) framework, which fits essential requirements of real-world projects. The large-scale BEER is newly studied in the control approach rather than the optimization approach commonly used before. Optimal control is proposed to design optimal retrofitting strategy in terms of maximal energy savings and maximal NPV (net present value). The designed strategy is dynamically changing on dimensions of time, building and technology. The TBT framework and the optimal control approach are verified in a large BEER project, and results indicate that promising performance of energy and cost savings can be achieved in the general TBT framework. (C) 2016 Elsevier Ltd. All rights reserved.

C1 [Wu, Zhou] Chongqing Univ, Minist Educ, Key Lab Dependable Serv Comp Cyber Phys Soc, Chongqing 400044, Peoples R China.  
[Wu, Zhou] Chongqing Univ, Sch Automat, Chongqing 400044, Peoples R China.

[Wu, Zhou; Wang, Bo; Xia, Xiaohua] Univ Pretoria, Dept Elect & Comp Engr, ZA-0083 Pretoria, South Africa.

RP Wu, Z (reprint author), Chongqing Univ, Sch Automat, Chongqing 400044, Peoples R China.  
EM wuzhsky@gmail.com

CR Asadi E, 2012, ENER BUILDINGS, V44, P81, DOI 10.1016/j.enbuild.2011.10.016  
Ascione F, 2015, ENER BUILDINGS, V88, P78, DOI 10.1016/j.enbuild.2014.11.058  
Carstens H, 2014, APPL ENER, V126, P256, DOI 10.1016/j.apenergy.2014.03.049  
Diakaki C, 2008, ENER BUILDINGS, V40, P1747, DOI 10.1016/j.enbuild.2008.03.002  
Gustafsson SI, 1998, APPL ENER, V61, P13, DOI 10.1016/S0306-2619(98)00032-4  
Heo Y, 2015, BUILD ENVIRON, V87, P342, DOI 10.1016/j.buildenv.2014.12.016  
Juan YK, 2009, AUTOMAT CONSTR, V18, P394, DOI 10.1016/j.autcon.2008.10.006  
Kaklauskas A, 2005, ENER BUILDINGS, V37, P361, DOI 10.1016/j.enbuild.2004.07.005  
Karmellos M, 2015, APPL ENER, V139, P131, DOI 10.1016/j.apenergy.2014.11.023  
Krarti M, 2015, RENEW SUST ENER REV, V50, P1069, DOI 10.1016/j.rser.2015.05.063  
Ma ZJ, 2012, ENER BUILDINGS, V55, P889, DOI 10.1016/j.enbuild.2012.08.018  
Malatji EM, 2013, ENER BUILDINGS, V61, P81, DOI 10.1016/j.enbuild.2013.01.042  
Shao YM, 2014, ENER BUILDINGS, V82, P356, DOI 10.1016/j.enbuild.2014.07.030  
STEUER RE, 1983, MATH PROGRAM, V26, P326, DOI 10.1007/BF02591870  
Storn R, 1997, J GLOBAL OPTIM, V11, P341, DOI 10.1023/A:1008202821328  
Tan B, 2016, COMPUT OPER RES, V66, P258, DOI 10.1016/j.cor.2015.01.013  
Vose MD, 1999, SIMPLE GENETIC ALGOR, V12  
Wang B, 2015, ENER BUILDINGS, V96, P299, DOI 10.1016/j.enbuild.2015.03.032  
Wang B, 2014, ENER BUILDINGS, V77, P227, DOI 10.1016/j.enbuild.2014.03.025  
Wu Z, 2015, ENER BUILDINGS, V87, P45, DOI 10.1016/j.enbuild.2014.10.079  
Wu Z, 2015, APPL ENER, V148, P294, DOI 10.1016/j.apenergy.2015.03.109  
Wu Z, 2013, SOFT COMPUT, V17, P819, DOI 10.1007/s00500-012-0955-9  
Wu Z, 2012, STRUCT MULTIDISCIPLIN, V46, P853, DOI 10.1007/s00158-012-0800-x  
Ye XM, 2015, CONTROL ENG PRACT, V37, P1, DOI 10.1016/j.conengprac.2014.12.014  
Ye XM, 2013, APPL ENER, V112, P1006, DOI 10.1016/j.apenergy.2013.05.064  
Yin C, 2014, AUTOMATICA, V50, P3173, DOI 10.1016/j.automatica.2014.10.027  
Zhang QF, 2007, IEEE T EVOLUT COMPUT, V11, P712, DOI 10.1109/TEVC.2007.892759

NR 27

TC 11

Z9 11

U1 4

U2 13

PU PERGAMON-ELSEVIER SCIENCE LTD

PI OXFORD

PA THE BOULEVARD, LANGFORD LANE, KIDLINGTON, OXFORD OX5 1GB, ENGLAND

SN 0360-5442

EI 1873-6785

J9 ENERGY

J1 Energy

PD AUG 15

PY 2016

VL 109

BP 456

EP 465

DI 10.1016/j.energy.2016.04.124

PG 10

WC Thermodynamics; Energy & Fuels

SC Thermodynamics; Energy & Fuels

GA DV0EO

UT WOS:000382591000040

DA 2018-05-03

ER

FN Clarivate Analytics Web of Science

VR 1.0



PT J

AU Belaid, F

Garcia, T

AF Belaid, Fateh

Garcia, Thomas

TI Understanding the spectrum of residential energy-saving behaviours:

French evidence using disaggregated data

SO ENERGY ECONOMICS

LA English

DT Article

DE Energy-saving behaviours; Residential energy use; Econometric modelling;

IRT; Lasso

ID NONCONCAVE PENALIZED LIKELIHOOD; ELECTRICITY CONSUMPTION; ORACLE

PROPERTIES; CONSERVATION; HOUSEHOLDS; DEMAND; DETERMINANTS; EFFICIENCY;

SELECTION; FRANCE

AB Analysing household energy-saving behaviours is crucial to improve energy consumption predictions and energy policy making. How should we quantitatively measure them? What are their determinants?

This study explores the main factors influencing residential energy-saving behaviours based on a bottom-up multivariate statistical approach using data from the recent French PHEBUS survey. Firstly, we assess energy-saving behaviours on a one-dimension scale using IRT. Secondly, we use linear regression with an innovative variable selection method via adaptive lasso to tease out the effects of both macro and micro factors on the behavioural score. The results highlight the impact of five main attributes incentivizing energy-saving behaviours based on cross-variable analyses: energy price, household income, education level, age of head of household and dwelling energy performance. In addition, our results suggest that the analysis of the inverted U-shape impact of age enables the expansion of the energy consumption life cycle theory to energy-saving behaviours. (C) 2016 Elsevier B.V. All rights reserved.

C1 [Belaid, Fateh; Garcia, Thomas] Sci & Tech Ctr Bldg,84 Ave Jean Jaures, F-77447 Marne La Vallee, France.

[Garcia, Thomas] Univ Lyon, F-69007 Lyon, France.

[Garcia, Thomas] CNRS, GATE Lyon St Etienne, F-69130 Ecully, France.

RP Garcia, T (reprint author), Univ Lyon, F-69007 Lyon, France.; Belaid, F (reprint author), Univ Paris Est, Sci & Tech Ctr Bldg,14 Blvd Newton, F-77447 Champs Sur Marne 2, Marnela Vallee, France.

EM Fateh.BELAID@cstb.fr; GARCIA@gate.cnrs.fr

OI BELAID, Fateh/0000-0002-1077-2798

CR Abrahamse W, 2005, J ENVIRON PSYCHOL, V25, P273, DOI 10.1016/j.jenvp.2005.08.002

Allcott H, 2011, J PUBLIC ECON, V95, P1082, DOI 10.1016/j.jpubeco.2011.03.003

Baker Frank B., 2004, ITEM RESPONSE THEORY

BAKER P, 1989, ECON J, V99, P720, DOI 10.2307/2233767

Barr S, 2005, ENER POLICY, V33, P1425, DOI 10.1016/j.enpol.2003.12.016

Belaid F, 2016, ENER POLICY, V92, P220, DOI 10.1016/j.enpol.2016.02.015

Berkhout PHG, 2000, ENER POLICY, V28, P425, DOI 10.1016/S0301-4215(00)00022-7

Bernard JT, 1996, CAN J ECON, V29, P92, DOI 10.2307/136153

BLACK JS, 1985, J APPL PSYCHOL, V70, P3, DOI 10.1037//0021-9010.70.1.3

Bourdieu Pierre, 1984, DISTINCTION SOCIAL C

Branch ER, 1993, ENERGY J, V14, P111

Branco G, 2004, ENER BUILDINGS, V36, P543, DOI 10.1016/j.enbuild.2004.01.028

BREIMAN L, 1995, TECHNOMETRICS, V37, P373, DOI 10.2307/1269730

Brounen D, 2012, EUR ECON REV, V56, P931, DOI 10.1016/j.eurocorev.2012.02.007

Caner M., 2011, NEAR MINIMAX RISK BO

Carlsson-Kanyama A, 2007, ENER POLICY, V35, P2163, DOI 10.1016/j.enpol.2006.06.018

Cayla JM, 2011, ENER POLICY, V39, P7874, DOI 10.1016/j.enpol.2011.09.036

Cayla J.M., 2010, ACEEE SUMMER STUDY E

Chwieduk D, 2003, APPL ENER, V76, P211, DOI 10.1016/S0306-2619(03)00059-X

Darby Sarah, 2006, REV DEFRA LIT METERI, V486, P2006

Druckman A, 2008, ENER POLICY, V36, P3177, DOI 10.1016/j.enpol.2008.03.021

Dubin J. A., 1984, ECONOMETRICA J ECONO, P345

DWYER WO, 1993, ENVIRON BEHAV, V25, P275, DOI 10.1177/0013916593255001

Ehrhardt-Martinez K., 2010, ADV METERING INITIAT

Fabi V, 2012, BUILD ENVIRON, V58, P188, DOI 10.1016/j.buildenv.2012.07.009

- Fan JQ, 2004, ANN STAT, V32, P928, DOI 10.1214/009053604000000256  
 Fan JQ, 2001, J AM STAT ASSOC, V96, P1348, DOI 10.1198/016214501753382273  
 Fritzsche D.J., 1981, J MARKETING RES, P227  
 Gillingham K, 2012, ENER G J, V33, P37, DOI 10.5547/01956574.33.2.3  
 Greening LA, 2000, ENER G POLICY, V28, P389  
 Griffin J.M., 2005, ELECT DEREGULATION C, P1  
 Guerra-Santin O, 2010, BUILD RES INF, V38, P318, DOI 10.1080/09613211003661074  
 Hines J., 1987, J ENVIRON EDUC, V18, P1, DOI DOI 10.1080/00958964.1987.9943482  
 HIRST E, 1982, ENER G ECON, V4, P74, DOI 10.1016/0140-9883(82)90024-X  
 Hori S, 2013, ENER G POLICY, V52, P354, DOI 10.1016/j.enpol.2012.09.043  
 IEO, 2013, TECHNICAL REPORT  
 Kaiser FG, 1998, J APPL SOC PSYCHOL, V28, P395, DOI 10.1111/j.1559-1816.1998.tb01712.x  
 Labandeira X., 2005, 2005001 MIT CTR EN E  
 Lam JC, 1998, ENER G CONVERS MANAGE, V39, P623, DOI 10.1016/S0196-8904(97)10008-5  
 le Blanc D, 2001, J HOUS ECON, V10, P429, DOI 10.1006/jhec.2001.0300  
 Linden AL, 2006, ENER G POLICY, V34, P1918, DOI 10.1016/j.enpol.2005.01.015  
 Lopes MAR, 2012, RENEW SUST ENER G REV, V16, P4095, DOI 10.1016/j.rser.2012.03.034  
 Mizobuchi K, 2013, ENER G POLICY, V63, P775, DOI 10.1016/j.enpol.2013.08.064  
 Nesbakken R, 2001, SCAND J ECON, V103, P165, DOI 10.1111/1467-9442.00236  
 Ohler AM, 2014, ECOL ECON, V107, P1, DOI 10.1016/j.ecolecon.2014.07.031  
 Olaniyan MJ, 2014, ENER G POLICY, V69, P273, DOI 10.1016/j.enpol.2013.12.023  
 OLSEN ME, 1981, J SOC ISSUES, V37, P108, DOI 10.1111/j.1540-4560.1981.tb02628.x  
 PARTI M, 1980, BELL J ECON, V11, P309, DOI 10.2307/3003415  
 PICKETT GM, 1993, J PUBLIC POLICY MARK, V12, P234  
 Risch A., 2013, TECHNICAL REPORT  
 Sa'ad S, 2011, ENER G POLICY, V39, P40, DOI 10.1016/j.enpol.2010.09.001  
 Samejima F., 1969, PSYCHOMETRIKA MONO S  
 Sanquist TF, 2012, ENER G POLICY, V42, P354, DOI 10.1016/j.enpol.2011.11.092  
 Sardianou E, 2007, ENER G POLICY, V35, P3778, DOI 10.1016/j.enpol.2007.01.020  
 SONDEREGGER RC, 1978, ENER G BUILDINGS, V1, P313, DOI 10.1016/0378-7788(78)90011-7  
 Steg L, 2009, J ENVIRON PSYCHOL, V29, P309, DOI 10.1016/j.jenvp.2008.10.004  
 Summerfield AJ, 2010, BUILD RES INF, V38, P42, DOI 10.1080/09613210903262512  
 Swan LG, 2009, RENEW SUST ENER G REV, V13, P1819, DOI 10.1016/j.rser.2008.09.033  
 Tibshirani R, 1996, J ROY STAT SOC B MET, V58, P267  
 Valenzuela C, 2014, ENER G POLICY, V69, P263, DOI 10.1016/j.enpol.2013.12.009  
 Wang ZH, 2011, ENER G POLICY, V39, P3550, DOI 10.1016/j.enpol.2011.03.055  
 Yue T, 2013, ENER G POLICY, V62, P665, DOI 10.1016/j.enpol.2013.07.051  
 Zhou SJ, 2013, ENER G POLICY, V61, P394, DOI 10.1016/j.enpol.2013.06.092  
 Zou H, 2006, J AM STAT ASSOC, V101, P1418, DOI 10.1198/016214506000000735

NR 64

TC 11

Z9 11

U1 1

U2 12

PU ELSEVIER SCIENCE BV

PI AMSTERDAM

PA PO BOX 211, 1000 AE AMSTERDAM, NETHERLANDS

SN 0140-9883

EI 1873-6181

J9 ENER G ECON

JI Energy Econ.

PD JUN

PY 2016

VL 57

BP 204

EP 214

DI 10.1016/j.eneco.2016.05.006

PG 11

WC Economics  
 SC Business & Economics  
 GA DS1YA  
 UT WOS:000380419900018  
 DA 2018-05-03  
 ER

PT J  
 AU Wells, EM

Berges, M  
 Metcalf, M  
 Kinsella, A  
 Foreman, K  
 Dearborn, DG  
 Greenberg, S

AF Wells, Ellen M.

Berges, Matt  
 Metcalf, Mandy  
 Kinsella, Audrey  
 Foreman, Kimberly  
 Dearborn, Dorr G.  
 Greenberg, Stuart

TI Indoor air quality and occupant comfort in homes with deep versus  
 conventional energy efficiency renovations

SO BUILDING AND ENVIRONMENT

LA English

DT Article

DE Indoor air pollution; Conservation of energy resources; Ventilation;  
 Carbon dioxide; Volatile organic hydrocarbons; Thermal comfort

ID ENVIRONMENTAL-QUALITY; GREEN RENOVATION; HEALTH OUTCOMES; PUBLIC-HEALTH;  
 ASTHMA; BUILDINGS; SATISFACTION; POLLUTION; CHILDREN; IMPACT

AB Deep energy retrofits (DER) for residential housing have been proposed to reduce greenhouse gas emissions; these result in similar to 50% additional energy efficiency compared to standard, energy star (ES), renovations. However, the impact of increased energy efficiency on indoor air quality (IAQ) is poorly understood. We conducted a longitudinal study to compare IAQ and occupant comfort in 12 low income single-family homes renovated to a DER or ES standard. Quarterly visits were conducted for a median of 18 months post-renovation; IAQ was assessed in 4 rooms per visit for a total of 237 measurements. Multivariable regression models accounted for repeated measurements and controlled for house- and family-related covariates. In fully adjusted models, average difference (95% confidence interval) in IAQ parameters in DER homes versus ES homes were: temperature: -0.3 degrees C (-1.2, 0.6); relative humidity: 0.4% (-1.1, 1.8); carbon dioxide: 43.7 ppm (-18.8, 106.2); and total volatile organic compounds: 198 ppb (-224, 620). Residents in DER homes were significantly less likely to report their homes were comfortable, most likely due to initial difficulties with new heating system technology. We found no differences in IAQ between DER and ES homes; however, education is strongly recommended when incorporating new technology into residences. (C) 2015 The Authors. Published by Elsevier Ltd.

C1 [Wells, Ellen M.] Purdue Univ, Sch Hlth Sci, W Lafayette, IN 47907 USA.

[Berges, Matt; Metcalf, Mandy; Kinsella, Audrey; Foreman, Kimberly; Greenberg, Stuart] Environm Hlth Watch, Cleveland, OH 44113 USA.

[Dearborn, Dorr G.] Case Western Reserve Univ, Sch Med, Dept Environm Hlth Sci, Cleveland, OH 44106 USA.

RP Wells, EM (reprint author), Purdue Univ, Sch Hlth Sci, 550 Stadium Mall Dr, HAMP 1269, W Lafayette, IN 47907 USA.

EM wells54@purdue.edu

OI Wells, Ellen/0000-0002-7293-1395

FU United States Department of Housing and Urban Development Healthy Homes  
 Technical Studies Grant [OHLHH0203-09]; Cleveland Foundation; Mary Ann  
 Swetland Center for Environmental Health

FX The authors would like to thank William Hutzell, Mike Piepsny, Fatima

Allen, Akbar Tyler, Debrah Mohammed, George Trappe, Jody Lavrich, Kate Monter-Durban, Jim Todt and Linda Wigington for their contributions to this research. This study was supported by the United States Department of Housing and Urban Development Healthy Homes Technical Studies Grant# OHLHH0203-09 and a grant from the Cleveland Foundation. The Mary Ann Swetland Center for Environmental Health also provided partial support (EMW; DGD).

- CR ASHRAE, 2010, VENT ACC IND AIR QUA  
 Metcalf M., 2013, J LIGHT CONSTR, P55  
 Bone A, 2010, PERSPECT PUBLIC HEAL, V130, P233, DOI 10.1177/1757913910369092  
 Breyse J, 2015, J PUBLIC HEALTH MAN, V21, P355, DOI 10.1097/PHH.0000000000000199  
 Breyse J, 2011, PUBLIC HEALTH REP, V126, P64, DOI 10.1177/00333549111260S110  
 Breyse Patrick N, 2010, Proc Am Thorac Soc, V7, P102, DOI 10.1513/pats.200908-083RM  
 Amann J, 2014, RESIDENTIAL DEEP ENE  
 Colton MD, 2014, ENVIRON SCI TECHNOL, V48, P7833, DOI 10.1021/es501489u  
 Crump D., 2009, INDOOR AIR QUALITY H  
 Day JK, 2015, BUILD ENVIRON, V84, P114, DOI 10.1016/j.buildenv.2014.11.003  
 Derbez M, 2014, BUILD ENVIRON, V72, P173, DOI DOI 10.1016/J.BUILDENV.2013.10.017  
 Derbez M, 2014, BUILD ENVIRON, V82, P288, DOI 10.1016/j.buildenv.2014.08.028  
 Diggle PJ, 2002, ANAL LONGITUDINAL DA  
 Cuevas J., 2012, ENTERPRISE GREEN COM  
 Frey SE, 2015, INDOOR AIR, V25, P210, DOI 10.1111/ina.12134  
 Frontczak M, 2011, BUILD ENVIRON, V46, P922, DOI 10.1016/j.buildenv.2010.10.021  
 Garland E, 2013, PROG COMM HLTH PARTN, V7, P29, DOI 10.1353/cpr.2013.0010  
 Hamilton I, 2015, BMJ OPEN, V5, DOI 10.1136/bmjopen-2014-007298  
 Hemsath TL, 2012, J HOUS BUILT ENVIRON, V27, P389, DOI 10.1007/s10901-011-9260-7  
 Howden-Chapman P, 2011, INT J PUBLIC HEALTH, V56, P583, DOI 10.1007/s00038-011-0287-z  
 Howieson SG, 2014, BUILD SERV ENG RES T, V35, P475, DOI 10.1177/0143624413510307  
 Jacobs DE, 2015, J PUBLIC HEALTH MAN, V21, P345, DOI 10.1097/PHH.0000000000000047  
 Jacobs DE, 2014, J ENVIRON HEALTH, V76, P8  
 Jacobs D.E., 2014, J ENV HLTH, V76, P60  
 Jones AP, 1999, ATMOS ENVIRON, V33, P4535, DOI 10.1016/S1352-2310(99)00272-1  
 Kercksmar CM, 2006, ENVIRON HEALTH PERSP, V114, P1574, DOI 10.1289/ehp.8742  
 Leech JA, 2004, INDOOR AIR, V14, P169, DOI 10.1111/j.1600-0668.2004.00212.x  
 Levy RJ, 2015, NEUROTOXICOL TERATOL, V49, P31, DOI 10.1016/j.ntt.2015.03.001  
 Levy J.I., 2003, ENV HLTH, V2, P4  
 Liang HH, 2014, BUILD ENVIRON, V72, P232, DOI 10.1016/j.buildenv.2013.11.007  
 Lubeck A, 2010, J GREEN BUILD, V5, P3, DOI 10.3992/jgb.5.3.3  
 Maidment CD, 2014, ENERG POLICY, V65, P583, DOI 10.1016/j.enpol.2013.10.054  
 Milner J, 2014, BMJ-BRIT MED J, V348, DOI 10.1136/bmj.f7493  
 Mitchell CS, 2007, ENVIRON HEALTH PERSP, V115, P958, DOI 10.1289/ehp.8987  
 Perez-Lombard L, 2008, ENERG BUILDINGS, V40, P394, DOI 10.1016/j.enbuild.2007.03.007  
 Samet JM, 2003, AM J PUBLIC HEALTH, V93, P1489, DOI 10.2105/AJPH.93.9.1489  
 Sharpe RA, 2015, ENVIRON INT, V75, P234, DOI 10.1016/j.envint.2014.11.017  
 Thousand Home Challenge, 2014, 1000 HOM CHALL RES  
 US Environmental Protectin Agency, 2014, EN STAR HOM VERS 2 G  
 U.S. Occupational Safety and Health Administration, 2011, IND AIR QUAL COMM I  
 United States National Oceanic and Atmospheric Administration Cleveland, 2015, CLEV OH CLIM INF  
 Walker SL, 2014, ENERGY RES SOC SCI, V2, P102, DOI 10.1016/j.erss.2014.04.004  
 Wilkinson P, 2009, LANCET, V374, P1917, DOI 10.1016/S0140-6736(09)61713-X  
 Wu F, 2007, ENVIRON HEALTH PERSP, V115, P953, DOI 10.1289/ehp.8986  
 ZEGER SL, 1986, BIOMETRICS, V42, P121, DOI 10.2307/2531248

NR 45

TC 11

Z9 11

U1 1

U2 56

PU PERGAMON-ELSEVIER SCIENCE LTD

PI OXFORD  
 PA THE BOULEVARD, LANGFORD LANE, KIDLINGTON, OXFORD OX5 1GB, ENGLAND  
 SN 0360-1323  
 EI 1873-684X  
 J9 BUILD ENVIRON  
 JI Build. Environ.  
 PD NOV  
 PY 2015  
 VL 93  
 BP 331  
 EP 338  
 DI 10.1016/j.buildenv.2015.06.021  
 PN 2  
 PG 8  
 WC Construction & Building Technology; Engineering, Environmental;  
 Engineering, Civil  
 SC Construction & Building Technology; Engineering  
 GA CR8EM  
 UT WOS:000361583900031  
 OA gold  
 DA 2018-05-03  
 ER

PT J

AU Angrisani, G  
 Canelli, M  
 Roselli, C  
 Sasso, M

AF Angrisani, Giovanni  
 Canelli, Michele  
 Roselli, Carlo  
 Sasso, Maurizio

TI Microcogeneration in buildings with low energy demand in load sharing  
 application

SO ENERGY CONVERSION AND MANAGEMENT

LA English

DT Article

DE Microcogeneration; Dynamic simulation; Load sharing; Buildings with low  
 energy demand; Climatic conditions

ID DYNAMIC PERFORMANCE ASSESSMENT; INTEGRATED COGENERATION SYSTEM;  
 OPTIMIZATION; SIMULATIONS; CALIBRATION; VALIDATION; OPERATION; NETWORK;  
 MODEL

AB The paper investigates the introduction of a MCHP (Micro Combined Heat and Power) system in buildings with low energy demand with respect to the current building stock. A load sharing approach between a multifamily residential building and an office one is taken into account. Dynamic simulations are carried out in order to evaluate the thermo-economic performance of the analyzed system. Particular attention is given to the estimation of the electric load of the different users, as the economic profitability of a MCHP system is strongly influenced by the amount of self-consumed electricity. In order to analyze the influence of climatic conditions, two different geographical locations in Italy (Naples and Turin, having 1034 and 2617 heating degree days, respectively) are considered. The results of this study indicate that the installation of MCHP systems in buildings with low energy demand allows to increase the percentage of self-consumed electricity reducing the bidirectional electricity flow between the users and the external grid, as well as the impact on the grid itself due to the large diffusion of distributed generation systems. Moreover this study shows that the load sharing approach between users with different load profile leads to better energy, environmental and economic results with respect to a conventional system. The climatic conditions play an important role on the MCHP operational hours and hence on the thermo-economic performance of the system. The primary energy saving of the system located in Turin is equal to 8.8% with respect to 6.2% of the system located in Naples. Also the environmental performance, evaluated in terms of

equivalent CO<sub>2</sub> avoided emissions, are better in Turin (8.3%) than in Naples (6.7%). The economic analysis shows acceptable values of the pay-back period in presence of economic support mechanisms. The findings of this study show that the introduction of a MCHP system in load sharing approach leads to thermo-economics advantages even considering the lower heating needs of well-insulated buildings. (C) 2015 Elsevier Ltd. All rights reserved.

C1 [Angrisani, Giovanni; Canelli, Michele; Roselli, Carlo; Sasso, Maurizio] Univ Sannio, Dipartimento Ingn, I-82100 Benevento, Italy.

RP Canelli, M (reprint author), Univ Sannio, Dipartimento Ingn, Piazza Roma 21, I-82100 Benevento, Italy.

EM mcanelli@unisannio.it

RI roselli, carlo/C-6684-2012; Canelli, Florencia/O-9693-2016

OI roselli, carlo/0000-0002-4423-8147; Canelli,

Florencia/0000-0001-6361-2117; Angrisani, Giovanni/0000-0003-2946-0134;

sasso, Maurizio/0000-0002-8318-8621

CR Angrisani G, 2012, PROG ENERG COMBUST, V38, P502, DOI 10.1016/j.pecs.2012.02.001

Angrisani G, 2014, APPL THERM ENG, V71, P628, DOI 10.1016/j.applthermaleng.2013.09.055

Angrisani G, 2014, APPL THERM ENG, V67, P190, DOI 10.1016/j.applthermaleng.2014.03.012

Angrisani G, 2014, ENERG CONVERS MANAGE, V80, P188, DOI 10.1016/j.enconman.2014.01.028

Aussant CD, 2009, ENERG BUILDINGS, V41, P1288, DOI 10.1016/j.enbuild.2009.07.021

Brandoni C, 2014, APPL THERM ENG, V71, P667, DOI 10.1016/j.applthermaleng.2013.10.044

Canelli M, 2015, APPL THERM ENG, V78, P315, DOI 10.1016/j.applthermaleng.2014.12.061

Caputo P, 2011, RDS201155 EL SYST RE

[Anonymous], 2011, GUID APPL MIN DECR E

Entchev E, CEORIES13099

[Anonymous], 2012, EU EN FIG STAT POCK, DOI 10.2833/11169

[Anonymous], REV EL LOSS FACT APP

Hirvonen J, 2014, APPL ENERG, V135, P350, DOI 10.1016/j.apenergy.2014.08.090

Hlebnikov A, 2009, OIL SHALE, V26, P269, DOI 10.3176/oil.2009.3S.09

[Anonymous], 1722012 ISPRA

Jordan U., 2001, REALISTIC DOMESTIC H, P2001

Kayo G, 2014, ENERG BUILDINGS, V82, P685, DOI 10.1016/j.enbuild.2014.07.077

Kelly N, 2007, SPECIFICATIONS MODEL

[Anonymous], 2004, TESS COMP LIB V 17 0

Mehler ED, 2013, RENEW ENERG, V51, P331, DOI 10.1016/j.renene.2012.09.009

Piacentino A, 2013, APPL ENERG, V111, P1204, DOI 10.1016/j.apenergy.2012.11.078

Richardson I, 2010, ENERG BUILDINGS, V42, P1878, DOI 10.1016/j.enbuild.2010.05.023

Rosato A, 2012, APPL THERM ENG, V45-46, P79, DOI 10.1016/j.applthermaleng.2012.04.020

Rosato A, 2014, ENERG CONVERS MANAGE, V79, P731, DOI 10.1016/j.enconman.2013.10.001

Rosato A, 2013, ENERG BUILDINGS, V64, P343, DOI 10.1016/j.enbuild.2013.05.035

Staffell I, 2008, PURCHASE COST CONDEN

TERNA, STAT FOR STAT DAT PR

TERNA, SUMM STAT DAT EL IT

[Anonymous], 2010, TRNSYS 17 TRANSIENT

UNI, 2008, 113002 UNI TS

NR 30

TC 11

Z9 11

U1 1

U2 10

PU PERGAMON-ELSEVIER SCIENCE LTD

PI OXFORD

PA THE BOULEVARD, LANGFORD LANE, KIDLINGTON, OXFORD OX5 1GB, ENGLAND

SN 0196-8904

EI 1879-2227

J9 ENERG CONVERS MANAGE

J1 Energy Conv. Manag.

PD AUG

PY 2015

VL 100

BP 78

EP 89

DI 10.1016/j.enconman.2015.04.065

PG 12

WC Thermodynamics; Energy &amp; Fuels; Mechanics

SC Thermodynamics; Energy &amp; Fuels; Mechanics

GA CL2DV

UT WOS:000356754700010

DA 2018-05-03

ER

PT J

AU Kavousian, A

Rajagopal, R

Fischer, M

AF Kavousian, Amir

Rajagopal, Ram

Fischer, Martin

TI Ranking appliance energy efficiency in households: Utilizing smart meter data and energy efficiency frontiers to estimate and identify the determinants of appliance energy efficiency in residential buildings

SO ENERGY AND BUILDINGS

LA English

DT Article

DE Home energy efficiency; Appliance energy efficiency; Stochastic Energy Efficiency Frontier (SEEF); Smart meter interval data; Stepwise regression; Home energy analytics; Energy efficiency ranking

ID ELECTRICITY; DEMAND

AB This paper offers a novel method to rank residential appliance energy efficiency utilizing energy efficiency frontiers. The method is validated using a real-world case study of 4231 buildings in Ireland. Our results show that structural factors have the largest impact on energy efficiency, followed by socioeconomic factors and behavioral factors. For example, households with high penetration of efficient lightbulbs and double-glazed windows were on average 4 and 3.5% more efficient than others. Households with the head of household having higher education are on average 1.3% more efficient than their peers. Finally, households that track their energy savings are on average 0.4% more efficient than others.

Furthermore, installing heater timers, wall insulation, and living in owned residences were correlated with higher efficiency. Generally, families with kids who have full-time employment and are highly-educated are more efficient compared to families with no kids, or families with retirees or unemployed members. This result has important implications for both targeting and messaging of energy efficiency programs.

Some behavioral factors demonstrated significant impact on appliance energy efficiency. For instance, households that expressed interest in making major energy-saving lifestyle changes scored higher efficiency ranks on average. Conversely, households that expressed doubt about their motivation to save energy ranked lower in efficiency. This finding validates the role of educational programs to increase awareness about energy efficiency and its importance.

In short, our results show that a data-driven analysis of a population is needed to develop a balanced view of the drivers of energy efficiency, and to devise a targeted approach to improve homes' energy efficiency. (C) 2015 Elsevier B.V. All rights reserved.

C1 [Kavousian, Amir] Stanford Univ, Sunrun Inc, Civil & Environm Engrn Dept, Stanford, CA 94305 USA.

[Rajagopal, Ram; Fischer, Martin] Stanford Univ, Civil & Environm Engrn, Stanford, CA 94305 USA.

[Rajagopal, Ram] Stanford Sustainable Syst Lab, Stanford, CA USA.

[Fischer, Martin] Ctr Integrated Facil Engrn, Stanford, CA USA.

RP Kavousian, A (reprint author), Stanford Univ, Sunrun Inc, Civil & Environm Engrn Dept, Stanford, CA 94305 USA.

EM amirk@alumni.stanford.edu

FU Center for Integrated Facility Engineering (CIFE) at Stanford University

FX The first author was funded by Center for Integrated Facility

Engineering (CIFE) at Stanford University. The authors would also like

to thank colleagues at Stanford Sustainable Systems Lab (S3L), especially Dr. June Flora, Dr. Chi-Woo Tan, Adrian Albert, and Jungsuk Kwac for their valuable comments and inputs throughout this research. The authors would like to express their appreciation of the respectful reviewers' comments.

CR Albert A, 2013, IEEE T POWER SYST, V28, P4019, DOI 10.1109/TPWRS.2013.2266122  
 Beckel C., 2013, P 4 INT C FUT EN SYS, P75  
 Becket C, 2012, P 4 ACM WORKSH EMB S, P169  
 Berges M., 2008, TSINGHUA SCI TECHNOL, V13, P406  
 Capasso A., 1994, IEEE T POWER SYST, V9  
 Carnes D., 1998, P 1998 SUMM STUD BUI  
 CAVES DW, 1980, J ECONOMETRICS, V14, P287, DOI 10.1016/0304-4076(80)90029-9  
 Commission for Energy Regulation of Ireland (CER), 2011, CER11080  
 DEMPSTER AP, 1977, J ROY STAT SOC B MET, V39, P1  
 FARRELL MJ, 1957, J R STAT SOC SER A-G, V120, P253, DOI 10.2307/2343100  
 Filippini M, 2011, ENERG POLICY, V39, P5811, DOI 10.1016/j.enpol.2011.06.002  
 Newsham Guy R., 2010, ENERG POLICY, V38, P3289  
 Herter K, 2007, ENERG POLICY, V35, P2121, DOI 10.1016/j.enpol.2006.06.019  
 Kavousian A, 2014, J COMPUT CIVIL ENG, V28, P79, DOI 10.1061/(ASCE)CP.1943-5487.0000327  
 Kavousian A, 2013, ENERGY, V55, P184, DOI 10.1016/j.energy.2013.03.086  
 Knight I., 2007, EUROPEAN CANADIAN NO  
 Kwac J, 2014, IEEE T SMART GRID, V5, P420, DOI 10.1109/TSG.2013.2278477  
 Margossian B., 1994, P ACEEE 1988 SUMM ST, V2  
 McLoughlin F., 2012, ENERGY BUILD, V2012  
 Natural Resources Defense Council NRDC, 2014, EFF APPL SAV EN MON  
 PARTI M, 1980, BELL J ECON, V11, P309, DOI 10.2307/3003415  
 Sexton Richard J., 1987, J CONSUM RES, V14, P55  
 US Department of Energy, 2014, BUILD EN DAT TABL 2  
 Zeifman M., 2011, IEEE T CONSUM ELECT, V57  
 [Anonymous], 2010, NY TIMES

NR 25  
 TC 11  
 Z9 11  
 U1 0  
 U2 29

PU ELSEVIER SCIENCE SA  
 PI LAUSANNE  
 PA PO BOX 564, 1001 LAUSANNE, SWITZERLAND  
 SN 0378-7788  
 EI 1872-6178

J9 ENERG BUILDINGS  
 JI Energy Build.  
 PD JUL 15  
 PY 2015  
 VL 99  
 BP 220  
 EP 230  
 DI 10.1016/j.enbuild.2015.03.052  
 PG 11

WC Construction & Building Technology; Energy & Fuels; Engineering, Civil  
 SC Construction & Building Technology; Energy & Fuels; Engineering  
 GA CL8RM  
 UT WOS:000357241800021  
 DA 2018-05-03  
 ER

PT J  
 AU Lopes, MAR



Antunes, CH

Martins, N

AF Lopes, Marta A. R.

Antunes, Carlos Henggeler

Martins, Nelson

TI Towards more effective behavioural energy policy: An integrative modelling approach to residential energy consumption in Europe

SO ENERGY RESEARCH & SOCIAL SCIENCE

LA English

DT Article

ID PROBLEM STRUCTURING METHODS; FUZZY COGNITIVE MAPS; ELECTRICITY CONSUMPTION; SAVING BEHAVIOR; MAPPING APPROACH; SOCIAL-SCIENCE; HUMAN-VALUES; END-USER; EFFICIENCY; SECTOR

AB Energy behaviours represent an important underexploited resource in the context of promoting end-use energy efficiency, namely in the residential sector. However, addressing the multidimensional nature of energy behaviours is a complex task and more effective behaviour change interventions and policies grounded on comprehensive approaches are required. An integrative intervention to explore the influence of usage energy behaviours on energy consumption was developed through an innovative combination of modelling techniques. A real-world case study was utilised to generate contextualised understanding. This intervention supported problem structuring methods as pertinent tools to be utilised in complex human-centred energy research, such as energy behaviours, by enabling the development of tailored methodologies which minimise the human bias. It further confirmed real-world behaviour change interventions should involve the different energy stakeholders and be designed to be flexible and adaptive. Results confirmed variables associated with different dimensions significantly impact energy consumption. In this case study the promotion of residential energy efficiency includes both structural and energy behavioural actions, namely a better insulation of the dwellings and encouraging specific usage energy behaviours. These results support the need to consider an integrative perspective when addressing energy behaviours and designing effective behavioural change interventions and energy efficiency policies. (C) 2015 Elsevier Ltd. All rights reserved.

C1 [Lopes, Marta A. R.; Antunes, Carlos Henggeler] INESC Coimbra, Rua Antero Quental 199, P-3000 Coimbra, Portugal.

[Lopes, Marta A. R.] ESAC Polytechn Inst Coimbra, Dept Environm, P-3045 Coimbra, Portugal.

[Antunes, Carlos Henggeler] Univ Coimbra, Dept Elect Engr & Computers, P-3030 Coimbra, Portugal.

[Martins, Nelson] Univ Aveiro, Dept Mech Engr, Campus Santiago, P-3810 Aveiro, Portugal.

RP Lopes, MAR (reprint author), INESC Coimbra, Rua Antero Quental 199, P-3000 Coimbra, Portugal.;

Lopes, MAR (reprint author), ESAC Polytechn Inst Coimbra, Dept Environm, P-3045 Coimbra, Portugal.

EM mlopes@esac.pt; ch@deec.uc.pt; nmartins@ua.pt

OI Henggeler Antunes, Carlos/0000-0003-4754-2168; Martins,

Nelson/0000-0002-9985-2806; Lopes, Marta/0000-0002-7413-1295

FU Energy and Mobility for Sustainable Regions Project

[CENTRO-07-0224-FEDER-002004]; Fundacao para a Ciencia e a Tecnologia (FCT) [SFRH/BD/51104/2010, UID/MULTI/00308/2013]

FX The authors would like to express their gratitude to Dr. Paulo Peixoto

for his contributions to the development of this study and to ISA -

Intelligent Sensing Anywhere for the technical support in energy

monitoring. This work has been developed under the Energy for

Sustainability Initiative of the University of Coimbra and partially

supported by the Energy and Mobility for Sustainable Regions Project

(CENTRO-07-0224-FEDER-002004) and by Fundacao para a Ciencia e a

Tecnologia (FCT) under grant SFRH/BD/51104/2010 and project grant

UID/MULTI/00308/2013. The paper benefited from the constructive comments

of the anonymous reviewers on an earlier version.

CR Abrahamse W, 2005, J ENVIRON PSYCHOL, V25, P273, DOI 10.1016/j.jenvp.2005.08.002

Ackermann F, 2012, EUR J OPER RES, V219, P652, DOI 10.1016/j.ejor.2011.11.014

AJZEN I, 1991, ORGAN BEHAV HUM DEC, V50, P179, DOI 10.1016/0749-5978(91)90020-T

Armenia S, 2009, 27 INT C SYST DYN SO

Bagozzi R. P., 2002, SOCIAL PSYCHOL CONSU

BANDURA A, 1991, ORGAN BEHAV HUM DEC, V50, P248, DOI 10.1016/0749-5978(91)90022-L

- Barr S, 2005, ENER POLICY, V33, P1425, DOI 10.1016/j.enpol.2003.12.016
- Bedir M, 2013, ENER BUILDINGS, V58, P194, DOI 10.1016/j.enbuild.2012.10.016
- BLACK JS, 1985, J APPL PSYCHOL, V70, P3, DOI 10.1037//0021-9010.70.1.3
- Breukers SC, 2011, ENERGY, V36, P2176, DOI 10.1016/j.energy.2010.06.027
- Cayla JM, 2011, ENER POLICY, V39, P7874, DOI 10.1016/j.enpol.2011.09.036
- Crosbie T., 2006, ENERGY ENV, V17, P735, DOI DOI 10.1260/0958-305X.17.5.735
- DHOLAKIA RR, 1983, J ECON PSYCHOL, V3, P231, DOI 10.1016/0167-4870(83)90004-1
- Ackermann F., 2001, RATIONAL ANAL PROBLE, P21
- EEA, 2013, ACH EN EFF BEH CHANG
- European Environment Agency, 2008, EN ENV REP 2008
- Ehrhardt-Martinez K, 2011, ENERGY SUSTAINABILIT, P598
- Ek K, 2010, ENER POLICY, V38, P1578, DOI 10.1016/j.enpol.2009.11.041
- Elias AA, 2008, ENER POLICY, V36, P3278, DOI 10.1016/j.enpol.2008.05.005
- ERSE, 2011, PPEC PORT TEND MECH
- European Comunities, 2004, EUR SPEND THEIR TIM
- Fishbein M., 1975, BELIEF ATTITUDE INTE
- Fri RW, 2014, ENERGY RES SOC SCI, V1, P183, DOI 10.1016/j.erss.2014.03.010
- Gardner GT, 2002, ENV PROBLEMS HUMAN B, P371
- Geelen D, 2013, ENER POLICY, V61, P151, DOI 10.1016/j.enpol.2013.05.107
- Goldblatt DL, 2005, ENER POLICY, V33, P257, DOI 10.1016/S0301-4215(03)0239-8
- Gynther L, 2011, ENERGY EFFICIENCY, P1, DOI DOI 10.1007/S12053-011-9115-9
- Haas R, 1997, ENER POLICY, V25, P789, DOI 10.1016/S0301-4215(97)00069-4
- Han Q, 2013, ENER POLICY, V52, P706, DOI 10.1016/j.enpol.2012.10.031
- HITCHCOCK G, 1993, ENER BUILDINGS, V20, P151, DOI 10.1016/0378-7788(93)90006-G
- Hori S, 2013, ENER POLICY, V52, P354, DOI 10.1016/j.enpol.2012.09.043
- INE DGEG, 2010, RES SECT EN CONS SUR
- Jefferson M, 2014, ENERGY RES SOC SCI, V4, P42, DOI 10.1016/j.erss.2014.08.006
- Jetter A, 2011, FUTURES, V43, P52, DOI 10.1016/j.futures.2010.05.002
- Karlin B, 2014, ENVIRON BEHAV, V46, P423, DOI 10.1177/0013916512467532
- Kavgic M, 2010, BUILD ENVIRON, V45, P1683, DOI 10.1016/j.buildenv.2010.01.021
- Kavousian A, 2013, ENERGY, V55, P184, DOI 10.1016/j.energy.2013.03.086
- Keirstead J, 2006, ENER POLICY, V34, P3065, DOI 10.1016/j.enpol.2005.06.004
- Kok G, 2011, ENER POLICY, V39, P5280, DOI 10.1016/j.enpol.2011.05.036
- Kowsari R, 2011, ENER POLICY, V39, P7505, DOI 10.1016/j.enpol.2011.06.030
- Lopes M, 2014, 3 EUR C BEH EN EFF U
- Lopes MAR, 2012, RENEW SUST ENER REV, V16, P4095, DOI 10.1016/j.rser.2012.03.034
- Madlener R, 2009, ENERGY, V34, P370, DOI 10.1016/j.energy.2008.10.011
- Marechal K, 2010, ECOL ECON, V69, P1104, DOI 10.1016/j.ecolecon.2009.12.004
- Martinsson J, 2011, ENER POLICY, V39, P5182, DOI 10.1016/j.enpol.2011.05.046
- Mingers J, 1997, OMEGA-INT J MANAGE S, V25, P489, DOI 10.1016/S0305-0483(97)00018-2
- Mingers J., 2001, RATIONAL ANAL PROBLE
- Moezzi M, 2014, ENERGY RES SOC SCI
- Moezzi M., 2010, 2010 ACEEE SUMMER ST
- Nair G, 2010, ENER POLICY, V38, P2956, DOI 10.1016/j.enpol.2010.01.033
- Nassen J, 2009, ENER EFFIC, V2, P221, DOI 10.1007/s12053-009-9046-x
- Neves LP, 2009, EUR J OPER RES, V199, P834, DOI 10.1016/j.ejor.2009.01.053
- Neves LMP, 2004, J OPER RES SOC, V55, P968, DOI 10.1057/palgrave.jors.2601763
- OECD/IEA AFD, 2008, PROM EN EFF INV CAS
- OECD/IEA, 2008, WORLDW TRENDS EN US, P94
- Oikonomou V, 2009, ENER POLICY, V37, P4787, DOI 10.1016/j.enpol.2009.06.035
- Ozesmi U, 2004, ECOL MODEL, V176, P43, DOI 10.1016/j.ecolmodel.2003.10.027
- PARK KS, 1995, INT J HUM-COMPUT ST, V42, P157, DOI 10.1006/ijhc.1995.1007
- Richardson I, 2010, ENER BUILDINGS, V42, P1878, DOI 10.1016/j.enbuild.2010.05.023
- Rosenhead J., 2001, RATIONAL ANAL PROBLE
- Sanquist TF, 2012, ENER POLICY, V42, P354, DOI 10.1016/j.enpol.2011.11.092
- Schultz M, 1996, ACAD MANAGE REV, V21, P529, DOI 10.2307/258671
- SCHWARTZ SH, 1994, J SOC ISSUES, V50, P19, DOI 10.1111/j.1540-4560.1994.tb01196.x
- Seem JE, 2005, ENER BUILDINGS, V37, P127, DOI 10.1016/j.enbuild.2004.04.004

Sovacool BK, 2014, ENERGY RES SOC SCI, V1, P1, DOI 10.1016/j.erss.2014.02.003  
 Sovacool BK, 2014, NATURE, V511, P529, DOI 10.1038/511529a  
 Stephenson J, 2010, ENER POLICY, V38, P6120, DOI 10.1016/j.enpol.2010.05.069  
 Sterman J. D., 2000, BUSINESS DYNAMICS SY  
 Stern PC, 2000, J SOC ISSUES, V56, P407, DOI 10.1111/0022-4537.00175  
 Stern PC, 2014, ENERGY RES SOC SCI  
 Swan LG, 2009, RENEW SUST ENERG REV, V13, P1819, DOI 10.1016/j.rser.2008.09.033  
 Taylor PG, 2014, ENERGY RES SOC SCI, V4, P32, DOI 10.1016/j.erss.2014.08.007  
 Thøgersen J, 2002, J ECON PSYCHOL, V23, P605, DOI 10.1016/S0167-4870(02)00120-4  
 van der Werff E, 2015, ENERGY RES SOC SCI, V6, P8, DOI 10.1016/j.erss.2014.11.002  
 VANRAAIJ WF, 1983, J ECON PSYCHOL, V3, P39, DOI 10.1016/0167-4870(83)90057-0  
 Venkatesh V, 2003, MIS QUART, V27, P425  
 Virkki-Hatakka T, 2013, ENER POLICY, V60, P499, DOI 10.1016/j.enpol.2013.04.052  
 Westcombe M, 2006, J OPER RES SOC, V57, P776, DOI 10.1057/palgrave.jors.2602161  
 Widen J, 2009, ENER BUILDINGS, V41, P753, DOI 10.1016/j.enbuild.2009.02.013  
 Wilk R, 2002, GLOBAL ENVIRON CHANG, V12, P5, DOI 10.1016/S0959-3780(01)00028-0  
 Yearworth M, 2014, EUR J OPER RES, V237, P932, DOI 10.1016/j.ejor.2014.02.015  
 Yucel G, 2011, 29 INT C SYST DYN SO

NR 82

TC 11

Z9 11

U1 1

U2 2

PU ELSEVIER SCIENCE BV

PI AMSTERDAM

PA PO BOX 211, 1000 AE AMSTERDAM, NETHERLANDS

SN 2214-6296

EI 2214-6326

J9 ENERGY RES SOC SCI

J1 Energy Res. Soc. Sci.

PD MAY

PY 2015

VL 7

BP 84

EP 98

DI 10.1016/j.erss.2015.03.004

PG 15

WC Environmental Studies

SC Environmental Sciences & Ecology

GA V3Y4B

UT WOS:000218700000009

DA 2018-05-03

ER

PT J

AU Papachristos, G

AF Papachristos, George

TI Household electricity consumption and CO2 emissions in the Netherlands:

A model-based analysis

SO ENERGY AND BUILDINGS

LA English

DT Article

DE Households; Electricity consumption; Bottom up modelling

ID ENERGY-CONSUMPTION; RESIDENTIAL SECTOR; BUILDING STOCK; FEEDBACK;

BEHAVIOR; INTERVENTION; TECHNOLOGIES; PERSPECTIVE; TRANSITION; IMPACTS

AB Twenty percent of the total energy consumption in the Netherlands comes from household electricity consumption. This comes from household electric appliances whose number has grown in recent years.

The paper explores the effect of smart meter introduction, appliance efficiency and consumer behaviour on

reducing electricity consumption in the Netherlands. It does so by combining two perspectives: a sociotechnical approach and a bottom up simulation approach. The range of scenarios explored through simulation in the paper provides an understanding of the interplay between efficiency, smart meter diffusion and consumer behaviour. The results show their effect on electricity consumption and suggest that further effort is required to control and reduce it. Insights from the paper suggest that future studies should disaggregate with respect to a number of factors. (C) 2014 Elsevier B.V. All rights reserved.

C1 Delft Univ Technol, Fac Technol Policy & Management, Policy Anal Sect, NL-2600 GA Delft, Netherlands.

RP Papachristos, G (reprint author), Delft Univ Technol, Fac Technol Policy & Management, Policy Anal Sect, Postbus 5015, NL-2600 GA Delft, Netherlands.

EM G.Papachristos@tudelft.nl

OI Papachristos, George/0000-0001-7622-3364

FU NWO [434-09-250]

FX This research was funded under NWO project number 434-09-250. The author would like to thank Pieter Bots and two anonymous reviewers for comments that improved the paper.

CR Abrahamse W, 2005, J ENVIRON PSYCHOL, V25, P273, DOI 10.1016/j.jenvp.2005.08.002

Abrahamse W, 2009, J ECON PSYCHOL, V30, P711, DOI 10.1016/j.joep.2009.05.006

Antal M, 2014, ENERG POLICY, V68, P585, DOI 10.1016/j.enpol.2013.11.016

Atkinson R.D., 2013, JUST FACTS EC BENEFIT

Attali S., 2010, FACTORS INFLUENCING

Cooke D., 2011, EMPOWERING CUSTOMER

Crosbie T, 2008, ENERG POLICY, V36, P2191, DOI 10.1016/j.enpol.2008.02.010

Cuijpers C., 2012, EUROPEAN DATA PRODUCTION, P269

Darby Sarah, 2006, REV DEFRA LIT METERS, V486, P2006

Darby S, 2010, BUILD RES INF, V38, P442, DOI 10.1080/09613218.2010.492660

de Jong A.H., 2004, LANGE TERMIJN BEVOL

Delmas M.A., 2013, THESIS DELFT TU

Dineen D, 2011, ENERG BUILDINGS, V43, P166, DOI 10.1016/j.enbuild.2010.09.004

Energy Research Centre of the Netherlands (ECN), 2012, EN EFF POL MEAS NETH

European Environmental Agency (EEA), 2010, TOT FIN EN CONS SECT, P1990

European Environmental Agency (EEA), 2013, NO52013 EEA

Ehrhardt-Martinez K., 2010, E105 AM COUNCIL EN EFF

European Parliament, 2010, OFFICIAL J EUROPEAN L, V153, P1

Farag S, 2007, TRANSPORT RES A-POL, V41, P125, DOI 10.1016/j.tra.2006.02.003

Faruqui A., 2009, UNLOCKING E3 BILLION

Faruqui A, 2010, ENERGY, V35, P1598, DOI 10.1016/j.energy.2009.07.042

Fischer C, 2008, ENERG EFFIC, V1, P79, DOI 10.1007/s12053-008-9009-7

Fraunhofer Institute for Systems and Innovation Research ISI, 2009, STUD EN SAV POT EU M

Gleerup M., 2010, ENERGY J, V31, P111

Gram-Hanssen K, 2013, ENERG EFFIC, V6, P447, DOI 10.1007/s12053-012-9184-4

Gram-Hanssen K, 2011, J CONSUM CULT, V11, P61, DOI 10.1177/1469540510391725

Gram-Hanssen K, 2010, J IND ECOL, V14, P150, DOI 10.1111/j.1530-9290.2009.00194.x

Gram-Hansen K., 2004, HOUSING THEORY SOC, V21, P17, DOI 10.1080/14036090410025816

Grin J., 2010, ROUTLEDGE STUDIES IN

Gronhoj A, 2011, INT J CONSUM STUD, V35, P138, DOI 10.1111/j.1470-6431.2010.00967.x

Han Q, 2013, ENERG POLICY, V52, P706, DOI 10.1016/j.enpol.2012.10.031

Hargreaves T, 2013, ENERG POLICY, V52, P126, DOI 10.1016/j.enpol.2012.03.027

Hargreaves T, 2010, ENERG POLICY, V38, P6111, DOI 10.1016/j.enpol.2010.05.068

Harmen R, 2013, ENERG POLICY, V60, P803, DOI 10.1016/j.enpol.2013.05.059

Houde S, 2013, ENERG J, V34, P87, DOI 10.5547/01956574.34.1.4

IEA, 2013, EN EFF MARK REP MARK

IEA, 2009, GADGETS POL EN EFF

Jensen J.O.K., 2009, C P ECEEE SUMM STUD

Kavgic M, 2010, BUILD ENVIRON, V45, P1683, DOI 10.1016/j.buildenv.2010.01.021

Kuijpers G.M., 2013, THESIS DELFT TU DELFT

Lee T, 2013, ENERG POLICY, V52, P363, DOI 10.1016/j.enpol.2012.09.048

Lukszo Z., 2009, 4 INT C CRIT INFR LI

Mahalingam A., 2013, THESIS DELFT TU DELFT

Marechal K, 2009, J ECON ISSUES, V43, P69, DOI 10.2753/JEI0021-3624430104  
 Martinsson J, 2011, ENER G POLICY, V39, P5182, DOI 10.1016/j.enpol.2011.05.046  
 Martiskainen M., 2008, C SUST CONS RES EXCH  
 McKenna E, 2012, ENER G POLICY, V41, P807, DOI 10.1016/j.enpol.2011.11.049  
 Melody W.H., 2007, OXFORD HDB INFORM CO, P55  
 Owen P., 2007, AMPERE STRIKES BACK  
 Paetz A.G., 2011, P 6 INT C EN EFF DOM  
 Pierce J., 2010, P 28 INT C HUM FACT  
 Pittini A., 2012, HOUSING EUROPE REV 2  
 Polder M., 2012, CAED C 2012 NUR  
 Press M, 2009, J PUBLIC POLICY MARK, V28, P102, DOI 10.1509/jppm.28.1.102  
 Ropke I, 1999, ECOL ECON, V28, P399, DOI 10.1016/S0921-8009(98)00107-4  
 Ropke I, 2012, TELEMAT INFORMAT, V29, P348, DOI 10.1016/j.tele.2012.02.001  
 Ropke I, 2012, RES POLICY, V41, P1631, DOI 10.1016/j.respol.2012.04.002  
 Ropke I, 2010, ENER G POLICY, V38, P1764, DOI 10.1016/j.enpol.2009.11.052  
 Santin OG, 2009, ENER G BUILDINGS, V41, P1223, DOI 10.1016/j.enbuild.2009.07.002  
 Schleich J, 2013, ENER G POLICY, V61, P1097, DOI 10.1016/j.enpol.2013.05.012  
 Silverstone Roger, 1993, TIME SOC, V2, P283  
 Sterman J. D., 2000, BUSINESS DYNAMICS SY  
 Strengers Y., 2010, ENER G POLICY, V39, P7312  
 Strengers Y, 2012, ENER G POLICY, V44, P226, DOI 10.1016/j.enpol.2012.01.046  
 Swan LG, 2009, RENEW SUST ENER G REV, V13, P1819, DOI 10.1016/j.rser.2008.09.033  
 Sweeney JC, 2013, ENER G POLICY, V61, P371, DOI 10.1016/j.enpol.2013.06.121  
 Thogersen J, 2010, ENER G POLICY, V38, P7732, DOI 10.1016/j.enpol.2010.08.025  
 Tseleki K., 2012, THESIS UTRECHT U UTR  
 United Nations, 2012, WORLD POP PROSP 2012  
 Vale B, 2010, BUILD RES INF, V38, P578, DOI 10.1080/09613218.2010.481438  
 van Dam S., 2013, THESIS DELFT TU  
 van Elburg H., 2011, 6 INT C EN EFF DOM A  
 Vine D., 2013, OPEN J ENERGY EFFICI, V2, P7, DOI DOI 10.4236/OJEE.2013.21002  
 von Hippel Eric, 2005, DEMOCRATIZING INNOVA  
 Wesseling A., 2010, ECOFYS FRAUNHOFER I  
 Williams E, 2011, NATURE, V479, P354, DOI 10.1038/nature10682  
 WINETT RA, 1975, AM J COMMUN PSYCHOL, V3, P123, DOI 10.1007/BF00877787  
 Yao RM, 2005, ENER G BUILDINGS, V37, P663, DOI 10.1016/j.enbuild.2004.09.007  
 Yucel G, 2013, ENER G BUILDINGS, V56, P134, DOI 10.1016/j.enbuild.2012.09.022  
 Herring H, 2009, ENER G CLIM ENVIRON, P1, DOI 10.1057/9780230583108  
 [Anonymous], 2009, OFFICIAL J EUROPEA L, V211, P55  
 [Anonymous], 2012, EL PRIC SCEN UNT LEA  
 [Anonymous], 2009, OFFICIAL J EUROPEA L, V40, P16  
 NR 83  
 TC 11  
 Z9 12  
 U1 1  
 U2 29  
 PU ELSEVIER SCIENCE SA  
 PI LAUSANNE  
 PA PO BOX 564, 1001 LAUSANNE, SWITZERLAND  
 SN 0378-7788  
 EI 1872-6178  
 J9 ENER G BUILDINGS  
 JI Energy Build.  
 PD JAN  
 PY 2015  
 VL 86  
 BP 403  
 EP 414  
 DI 10.1016/j.enbuild.2014.09.077

PG 12

WC Construction & Building Technology; Energy & Fuels; Engineering, Civil

SC Construction & Building Technology; Energy & Fuels; Engineering

GA AY3PI

UT WOS:000347494900038

DA 2018-05-03

ER

PT J

AU Feng, YP

Wu, Y

Liu, CB

AF Feng Yan-ping

Wu Yong

Liu Chang-bin

TI Energy-efficiency supervision systems for energy management in large public buildings: Necessary choice for China

SO ENERGY POLICY

LA English

DT Article

DE Energy efficiency; Public buildings; Supervision

AB Buildings are important contributors to total energy consumption accounting for around 30% of all energy consumed in China. Of this, around two-fifths are consumed within urban homes, one-fifth within public buildings, and two-fifths within rural area. Government office buildings and large-scale public buildings are the dominant energy consumers in cities but their consumption can be largely cut back through improving efficiency. At present, energy management in the large public sector is a particular priority in China. Firstly, this paper discusses how the large public building is defined, and then energy performance in large public buildings is studied. The paper also describes barriers to improving energy efficiency of large public buildings in China and examines the energy-efficiency policies and programs adopted in United States and European Union. The energy-efficiency supervision (EES) systems developed to improve operation and maintenance practices and promote energy efficiency in large public sector are described. The benefits of the EES systems are finally summarized. (C) 2009 Elsevier Ltd. All rights reserved.

C1 [Feng Yan-ping] Beijing Jiaotong Univ, Sch Econ & Management, Beijing 100044, Peoples R China.

[Wu Yong] Minist Housing & Urban Rural Dev, Beijing 100835, Peoples R China.

[Liu Chang-bin] Beijing Inst Civil Engn & Architecture, Beijing 100044, Peoples R China.

RP Feng, YP (reprint author), Beijing Jiaotong Univ, Sch Econ & Management, Jiaoda Donglu 18,5-803, Beijing 100044, Peoples R China.

EM fengyanping10@sohu.com

CR \*CC, 2005, TUT PUBL BUILD DES C, P78

\*EEB MIN HOUS URB, 2007, BUILD EN EFF HDB, P5

\*EPC, 2003, OFFICIAL J EURO 0401, P65

\*EST, 2004, EU DIR EN PERF BUILD

\*IEA, 2006, IEA PUBL, P15

JIANG Y, 2004, HEATING VENTILATING, V34, P17

KANG YB, 2007, CHALLENGE OPPORTUNIT

Lang SW, 2004, ENERGBUILDINGS, V36, P1191, DOI 10.1016/j.enbuild.2003.09.014

\*NBS, 2006, CHINA STAT YB 2006, P145

\*SC, 2006, 11 5 YEAR GUID 2006

\*STSB, 1994, NAT STAND PEOPL REP

WU Y, 2007, EC INCENTIVE POLICY, P45

XUE ZF, 2005, STUDIES APPL MECH AP, P25

NR 13

TC 11

Z9 11

U1 0

U2 14

PU ELSEVIER SCI LTD

PI OXFORD  
 PA THE BOULEVARD, LANGFORD LANE, KIDLINGTON, OXFORD OX5 1GB, OXON, ENGLAND  
 SN 0301-4215  
 J9 ENER POLICY  
 JI Energy Policy  
 PD JUN  
 PY 2009  
 VL 37  
 IS 6  
 BP 2060  
 EP 2065  
 DI 10.1016/j.enpol.2008.12.033  
 PG 6  
 WC Economics; Energy & Fuels; Environmental Sciences; Environmental Studies  
 SC Business & Economics; Energy & Fuels; Environmental Sciences & Ecology  
 GA 448AK  
 UT WOS:000266233300003  
 DA 2018-05-03  
 ER

PT S

AU Williams, ED

Matthews, HS

AF Williams, Eric D.

Matthews, H. Scott

TI Scoping the potential of monitoring and control technologies to reduce energy use in homes

SO PROCEEDINGS OF THE 2007 IEEE INTERNATIONAL SYMPOSIUM ON ELECTRONICS & THE ENVIRONMENT, CONFERENCE RECORD

SE IEEE International Symposium on Electronics and the Environment-ISEE

LA English

DT Proceedings Paper

CT 15th International Symposium on Electronics and the Environment (ISEE)

CY MAY 07-10, 2007

CL Orlando, FL

SP IEEE Comp Soc TCEE

DE energy use; residences; monitoring and control technologies

AB This scoping study takes a broad look at how Information Technology-enabled monitoring and control systems in residences could play a role in mitigating energy use. Managing the residential sector is an important priority for addressing energy use, as use in homes represents 21 % of US total energy demand, up 16% from 1994. Much energy is apparently wasted in delivering energy services not actually used by residents. These include heating/cooling of unoccupied houses and rooms, overheating or overcooling to make up for temperature variations, leakage current due to appliances in standby or off mode, and purchase of needlessly energy intensive models of appliances. The results of our initial rough estimate is that around 40% residential energy use is used to deliver these types of "unused" energy services. IT-enabled monitoring and control technologies have played an important role in eliminating similar kinds of waste in other sectors, so it is natural to think that these systems could have an important role in the home as well. The technology level of energy control in homes is at least 20 years old, with simple programmable thermostats still in only about a quarter of US homes. Networked thermostats, power meters and switches, and zone heating are technologies that can provide information on energy use and allow energy use to be controlled for distribution only when needed We estimate that monitoring and control systems could save from 3-26% of residential energy use. The lower end corresponds to use of a programmable thermostat and the upper to an integrated system including monitoring and control of appliances, plus zone heating/cooling. We propose that these results provide renewed motivation to investigate the promotion of smart home energy technologies.

C1 [Williams, Eric D.] Arizona State Univ, Civil & Env Engr & Sch Sustainabil, Tempe, AZ 85287 USA.

[Matthews, H. Scott] Carnegie Mellon Univ, Civil & Environm Engr, Pittsburgh, PA USA.

RP Williams, ED (reprint author), Arizona State Univ, Civil & Env Engrn & Sch Sustainabil, Tempe, AZ 85287 USA.

EM ericwilliams@asu.edu; hsm@cmu.edu

FU Intel Corporation

FX This research was funded in part by Intel Corporation.

CR Ardehali MM, 1996, ENER CONVERS MANAGE, V37, P1469, DOI 10.1016/0196-8904(95)00219-7

\*EPA, 2004, CALC PROGR THERM

KOOMEY JG, 1998, LBNL39511

MEIER A, 1997, RESULTS INVESTIGATIO

ROBERTS S, 2003, CONSUMERS PREFERENCE

UENO T, 2005, EFFECTIVENESS DISPLA, P1289

\*US DOE, 2004, DOEEIA0384

U.S Energy Information Administration, RES EN CONS SURV

WADE P, 2005, PRESENTATION SLIDES

WILLIAMS E, 2006, 2006 IEEE INT S EL E, P161

NR 10

TC 11

Z9 11

U1 0

U2 3

PU IEEE

PI NEW YORK

PA 345 E 47TH ST, NEW YORK, NY 10017 USA

SN 1095-2020

BN 978-1-4244-0861-0

J9 IEEE INT SYMP ELECTR

PY 2007

BP 239

EP +

DI 10.1109/ISEE.2007.369401

PG 2

WC Engineering, Environmental; Engineering, Industrial

SC Engineering

GA BGN15

UT WOS:000248562400046

DA 2018-05-03

ER

PT J

AU Makonin, S

Ellert, B

Bajic, IV

Popowich, F

AF Makonin, Stephen

Ellert, Bradley

Bajic, Ivan V.

Popowich, Fred

TI Electricity, water, and natural gas consumption of a residential house  
in Canada from 2012 to 2014

SO SCIENTIFIC DATA

LA English

DT Article; Data Paper

AB With the cost of consuming resources increasing (both economically and ecologically), homeowners need to find ways to curb consumption. The Almanac of Minutely Power dataset Version 2 (AMPds2) has been released to help computational sustainability researchers, power and energy engineers, building scientists and technologists, utility companies, and eco-feedback researchers test their models, systems, algorithms, or prototypes on real house data. In the vast majority of cases, real-world datasets lead to more accurate models and algorithms. AMPds2 is the first dataset to capture all three main types of consumption



(electricity, water, and natural gas) over a long period of time (2 years) and provide 11 measurement characteristics for electricity. No other such datasets from Canada exist. Each meter has 730 days of captured data. We also include environmental and utility billing data for cost analysis. AMPds2 data has been pre-cleaned to provide for consistent and comparable accuracy results amongst different researchers and machine learning algorithms.

C1 [Makonin, Stephen; Bajic, Ivan V.] Simon Fraser Univ, Engn Sci, 8888 Univ Dr, Burnaby, BC V5A 1S6, Canada.

[Makonin, Stephen; Ellert, Bradley; Popowich, Fred] Simon Fraser Univ, Comp Sci, 8888 Univ Dr, Burnaby, BC V5A 1S6, Canada.

RP Makonin, S (reprint author), Simon Fraser Univ, Engn Sci, 8888 Univ Dr, Burnaby, BC V5A 1S6, Canada.;

Makonin, S (reprint author), Simon Fraser Univ, Comp Sci, 8888 Univ Dr, Burnaby, BC V5A 1S6, Canada.

EM smakonin@sfu.ca

CR Anderson K., 2012, 2012 WORKSH DAT MIN

Barker S., 2012, 2012 WORKSH DAT MIN

Batra Nipun, 2013, P 5 ACM WORKSH EMB S, P1

Beckel C., 2014, P 1 ACM C EMB SYST E, P80, DOI DOI 10.1145/2674061.2674064

Carlis J., 2013, ARE LONG TERM ELECTR

Ehrhardt-Martinez K., 2010, ADV METERING INITIAT

Ellert B., 2015, P EAI INT C BIG DAT

Ellert B., 2015, THESIS

Froehlich J, 2010, CHI2010: PROCEEDINGS OF THE 28TH ANNUAL CHI CONFERENCE ON HUMAN FACTORS IN COMPUTING SYSTEMS, VOLS 1-4, P1999

Hadzic F, 2011, STUD COMPUT INTELL, V333, P1

Hebrail G., 2012, INDIVIDUAL HOUSEHOLD

Kelly J, 2015, SCI DATA, V2, DOI 10.1038/sdata.2015.7

Kolter J., 2011, WORKSH DAT MIN APPL

Maasoumy M., 2013, P WORKSH BIG LEARN C

Makonin S., 2014, GSTF J COMPUTING JOC, V2, P186

Makonin S., 2011, P 11 INT C SMART GRA, P194

Makonin S., 2011, USEFUL SERVICES ELDE

Makonin S., 2014, P 2014 IEEE CAN INT

Makonin S, 2015, CONVERSION SCRIPTS F

Makonin S., 2014, P COMP GRAPH INT CGI

MAKONIN STEPHEN, 2015, IEEE T SMART GRID, P1

Makonin S, 2013, 2013 IEEE ELECTRICAL POWER & ENERGY CONFERENCE (EPEC), DOI 10.1109/EPEC.2013.6802949

Monacchi A, 2014, INT CONF SMART GRID, P511, DOI 10.1109/SmartGridComm.2014.7007698

Natural Resources Canada, 2014, ENERGUIDE CAN

Pereira L., 2014, ICT SUSTAINABILITY 2

Plumer B., 2013, WASHINGTON POST

Strange T., 2008, SUSTAINABLE DEV

Street P., 2010, PECAN STREET PROJECT

NR 28

TC 10

Z9 10

U1 1

U2 7

PU NATURE PUBLISHING GROUP

PI LONDON

PA MACMILLAN BUILDING, 4 CRINAN ST, LONDON N1 9XW, ENGLAND

SN 2052-4463

J9 SCI DATA

Jl Sci. Data

PD JUN 7

PY 2016

VL 3

AR UNSP 160037

DI 10.1038/sdata.2016.37

PG 12  
WC Multidisciplinary Sciences  
SC Science & Technology - Other Topics  
GA EF3IK  
UT WOS:000390217800002  
PM 27271937  
OA gold  
DA 2018-05-03  
ER

PT J  
AU Wang, ZH  
Han, B  
Lu, ML  
AF Wang, Zhaohua  
Han, Bai  
Lu, Milin

TI Measurement of energy rebound effect in households: Evidence from residential electricity consumption in Beijing, China

SO RENEWABLE & SUSTAINABLE ENERGY REVIEWS

LA English

DT Review

DE Energy efficiency; Rebound effect; Energy input-output

ID EFFICIENCY IMPROVEMENTS; EMPIRICAL-EVIDENCE; UK HOUSEHOLDS;

UNITED-STATES; US HOUSEHOLDS; DEMAND; COUNTRIES; BACKFIRE; POLICY; PRICE

AB Energy efficiency improvement policies have special significance for carbon emissions reduction and the mitigation of the effects of climate change. However the energy rebound effect caused by technological progress will indirectly increase energy consumption. The magnitude of the rebound effect largely determines the effectiveness of energy efficiency in mitigating energy consumption. This study reviews the main theory behind estimated methods of energy rebound effect measurement, focuses on constructing a double logarithm energy demand model and an error correction model of the asymmetric demand responses of electricity price changes to empirically analyse the direct rebound effect on residential electricity use in Beijing. It integrates consumer's demand theory with the embodied electricity of household spending from a seven-sector environmental energy-input-output (E-I-O) analysis to estimate the indirect rebound effect. The three income-elasticity, weight change, and proportional re spending scenario simulation results show that: residential electricity use in Beijing exhibits a partial rebound effect, and the long-term direct and indirect rebound effects are 46% to 56%, and the short-term direct rebound effect is 24% to 37%. Finally, the direct and indirect energy rebound effect for various income groups needs further research. An appropriate policy mix should be adopted to mitigate effectively the rebound effect in China's current lower energy price and lower energy efficiency market. (C) 2015 Elsevier Ltd. All rights reserved.

C1 [Wang, Zhaohua; Han, Bai; Lu, Milin] Beijing Inst Technol, Sch Management & Econ, Beijing 100081, Peoples R China.

[Wang, Zhaohua; Han, Bai; Lu, Milin] Beijing Inst Technol, Ctr Energy & Environm Policy Res, Beijing 100081, Peoples R China.

[Lu, Milin] Beijing Inst Petrochem Technol, Sch Econ & Management, Beijing 102617, Peoples R China.

[Wang, Zhaohua] Collaborat Innovat Ctr Elect Vehicles Beijing, Beijing 100081, Peoples R China.

RP Wang, ZH (reprint author), Beijing Inst Technol, Sch Management & Econ, Beijing 100081, Peoples R China.

EM wangzh1018@hotmail.com

FU National Natural Science Foundation of China [71173017, 71573016, 71521002]; State Key Development Program of Basic Research of China [2012CB95570003]

FX This study is supported by the National Natural Science Foundation of China (Ref. nos. 71173017 and 71573016, 71521002) and State Key Development Program of Basic Research of China (Ref. no. 2012CB95570003). The authors also want to thank Prof. Yiming Wei for his comment and suggestion.

- CR Athukorala W, 2009, ENERG ECON, V31, P1
- Baumert K, 2003, DATA NOTE HEATING CO
- Bentzen J, 2004, ENERG ECON, V26, P123, DOI 10.1016/S0140-9883(03)00047-1
- Berkhout HG, 2000, ENERG POLICY, V28, P425
- Binswanger M, 2001, ECOL ECON, V36, P119, DOI 10.1016/S0921-8009(00)00214-7
- Brannlund R, 2007, ENERG ECON, V29, P1, DOI 10.1016/j.eneco.2005.09.003
- BROOKES L, 1990, ENERG POLICY, V18, P199, DOI 10.1016/0301-4215(90)90145-T
- BROOKES LG, 1978, ENERG POLICY, V6, P94, DOI 10.1016/0301-4215(78)90031-9
- Chitnis M, 2013, ENERG POLICY, V55, P234, DOI 10.1016/j.enpol.2012.12.008
- Dargay J., 1992, ARE PRICE INCOME ELA
- Dergiades T, 2008, ENERG ECON, V30, P2722, DOI 10.1016/j.eneco.2008.05.005
- Druckman A, 2011, ENERG POLICY, V39, P3572, DOI 10.1016/j.enpol.2011.03.058
- Freire-Gonzalez J, 2011, ECOL MODEL, V223, P32, DOI 10.1016/j.ecolmodel.2011.09.001
- Freire-Gonzalez J. F., 2010, ENERG POLICY, V38, P2309
- Frondel M., 2008, ENERGY J, V29, P154, DOI DOI 10.5547/ISSN0195-6574-EJ-V0129-N04-7
- Galvin R, 2014, ENERG POLICY, V73, P323, DOI 10.1016/j.enpol.2014.02.033
- Gately D, 2002, ENERGY J, V23, P19
- GATELY D, 1993, ENERGY J, V14, P163
- Gavankar S., 2010, REBOUND EFFECT STATE
- Greening LA, 2000, ENERG POLICY, V28, P389
- Haas R, 1998, ENERG ECON, V20, P421, DOI 10.1016/S0140-9883(98)00003-6
- Haas R, 2000, ENERG POLICY, V28, P403, DOI 10.1016/S0301-4215(00)00023-9
- Hens H, 2010, ENERG BUILDINGS, V42, P105, DOI 10.1016/j.enbuild.2009.07.017
- Jin SH, 2007, ENERG POLICY, V35, P5622, DOI 10.1016/j.enpol.2007.05.028
- Kadioglu M, 1999, J APPL METEOROL, V38, P837, DOI 10.1175/1520-0450(1999)038<0837:DDFAAI>2.0.CO;2
- Khazzoom J. D, 1980, ENERGY J, V1, P21
- LEONTIEF W, 1970, REV ECON STAT, V52, P262, DOI 10.2307/1926294
- Lin BQ, 2013, ENERGY, V59, P240, DOI 10.1016/j.energy.2013.07.021
- Mizobuchi K, 2008, ENERG ECON, V30, P2486, DOI 10.1016/j.eneco.2008.01.001
- Orea L, 2015, ENERG ECON, V49, P599, DOI 10.1016/j.eneco.2015.03.016
- Ouyang JL, 2010, ENERGY, V35, P5269, DOI 10.1016/j.energy.2010.07.038
- Roy J, 2000, ENERG POLICY, V28, P433, DOI 10.1016/S0301-4215(00)00027-6
- Sailor DJ, 2001, ENERGY, V26, P645, DOI 10.1016/S0360-5442(01)00023-8
- Sanne C, 2000, ENERG POLICY, V28, P487, DOI 10.1016/S0301-4215(00)00031-8
- Saunders HD, 2008, ENERG ECON, V30, P2184, DOI 10.1016/j.eneco.2007.11.006
- Saunders HD, 2012, ENERG POLICY, V49, P477, DOI 10.1016/j.enpol.2012.06.050
- Saunders HD, 2000, ENERG POLICY, V28, P497, DOI 10.1016/S0301-4215(00)00025-2
- Saunders HD, 2000, ENERG POLICY, V28, P439, DOI 10.1016/S0301-4215(00)00024-0
- Schleich J, 2014, ENERG POLICY, V72, P35, DOI 10.1016/j.enpol.2014.04.028
- Sorrel S., 2007, REBOUND EFFECT ASSES
- Sorrell S, 2009, ENERG POLICY, V37, P1456, DOI 10.1016/j.enpol.2008.12.003
- Su Q, 2012, ENERG POLICY, V45, P368, DOI 10.1016/j.enpol.2012.02.045
- Thom H., 1952, MON WEA REV, V80, P143, DOI [DOI 10.1175/1520-0493(1952)080<0143:SDSFTU>2.0.CO;2, 10. 1175/1520-0493(1952)080&LT;0143:SDSFTU&GT;2. 0. CO;2]
- Thomas BA, 2013, ECOL ECON, V86, P199, DOI 10.1016/j.ecolecon.2012.12.003
- Thomas BA, 2013, ECOL ECON, V86, P188, DOI 10.1016/j.ecolecon.2012.12.002
- Wang H, 2012, ENERG ECON, V34, P452, DOI 10.1016/j.eneco.2011.09.010
- Wang ZH, 2014, RENEW SUST ENERG REV, V30, P124, DOI 10.1016/j.rser.2013.09.002
- [?? Xue Dan], 2014, [?????. ?????, Acta Scientiarum Naturalium Universitatis Pekinensis], V50, P348
- Xue L, 2011, CHINA POPUL RESOUR E, V21, P55
- Yu BY, 2013, ENERG POLICY, P441
- Herring H, 2009, ENERG CLIM ENVIRON, P1, DOI 10.1057/9780230583108

NR 51

TC 10

Z9 10

U1 5

U2 45

PU PERGAMON-ELSEVIER SCIENCE LTD  
PI OXFORD  
PA THE BOULEVARD, LANGFORD LANE, KIDLINGTON, OXFORD OX5 1GB, ENGLAND  
SN 1364-0321  
J9 RENEW SUST ENERG REV  
JI Renew. Sust. Energ. Rev.  
PD MAY  
PY 2016  
VL 58  
BP 852  
EP 861  
DI 10.1016/j.rser.2015.12.179  
PG 10  
WC GREEN & SUSTAINABLE SCIENCE & TECHNOLOGY; Energy & Fuels  
SC Science & Technology - Other Topics; Energy & Fuels  
GA DG3CW  
UT WOS:000371948100071  
DA 2018-05-03  
ER

PT J

AU Gentile, N

    Laike, T

    Dubois, MC

AF Gentile, Niko

    Laike, Thorbjorn

    Dubois, Marie-Claude

TI Lighting control systems in individual offices rooms at high latitude:

    Measurements of electricity savings and occupants' satisfaction

SO SOLAR ENERGY

LA English

DT Article

DE Lighting control systems; Occupancy strategy; Daylight harvesting;

    Energy saving

ID ENERGY SAVINGS; BUILDINGS; PERFORMANCE; PATTERNS

AB An efficient lighting control systems (LCS) should take advantage of the natural light available, but this presents some technical challenges as well as user related issues. So far, the assessment of lighting energy consumption of LCS has been based on technical features rather than the occupants' acceptance. This article presents the results of a monitoring study in a real life setting. It provides some recommendations based on the human and technical aspects of LCS in small scale applications. Four identical peripheral office rooms located in Lund, Sweden, were equipped with four different LCS: manual switch at the door, presence detector, daylight dimming with absence detector and LED task lamp. Each occupant performed ordinary office tasks for two weeks in each room in April May 2013. A subjective evaluation concerning the general lighting experience and the appreciation of the LCS was carried out. The results indicate that the manual switch with absence detector was greatly appreciated and it accomplished good energy performances (75% savings compared to the presence detector). The daylight-linked LCS achieved only slightly higher savings (79%), due to relatively high standby losses. The desk lamp achieved 97% savings, but the lighting conditions were considered unacceptable by the office workers. In general, the participants in this study perceived all automatic controls as stressful. (C) 2016 Elsevier Ltd. All rights reserved.

C1 [Gentile, Niko; Dubois, Marie-Claude] Lund Univ, Div Energy & Bldg Design, Inst Architecture & Built Environm, POB 118, SE-22100 Lund, Sweden.

    [Laike, Thorbjorn] Lund Univ, Div Environm Psychol, Inst Architecture & Built Environm, POB 118, SE-22100 Lund, Sweden.

RP Gentile, N (reprint author), Lund Univ, Div Energy & Bldg Design, Inst Architecture & Built Environm, POB 118, SE-22100 Lund, Sweden.

EM niko.gentile@ebd.lth.se

OI Gentile, Niko/0000-0001-5721-6644

FU Swedish Energy Agency; Maj and Hilding Brosenius Research Foundation

- FX The authors thank the research staff and students who voluntarily participated in this study. This project was funded by the Swedish Energy Agency and supported by the Maj and Hilding Brosenius Research Foundation.
- CR Aghemo C, 2014, AUTOMAT CONSTR, V43, P10, DOI 10.1016/j.autcon.2014.02.015  
American Society of Heating and Refrigeration Engineers (ASHRAE), 2013, 9012013 ASHRAE  
Atif MR, 2003, ENERGBUILDINGS, V35, P441, DOI 10.1016/S0378-7788(02)00142-1  
Baker N., 2000, WE ARE ALL OUTDOOR A, P553  
Bodart M, 2002, ENERGBUILDINGS, V34, P421, DOI 10.1016/S0378-7788(01)00117-7  
Boyce PR, 2006, LIGHTING RES TECHNOL, V38, P358, DOI 10.1177/1477153506070994  
Boyce PR, 2014, HUMAN FACTORS IN LIGHTING, 3RD EDITION, P1, DOI 10.1201/b16707  
Brasche S, 2005, INT J HYG ENVIR HEAL, V208, P247, DOI 10.1016/j.ijheh.2005.03.003  
Brox J., 2012, BRILLIANT EVOLUTION  
Chang WK, 2013, BUILD SIMUL-CHINA, V6, P23, DOI 10.1007/s12273-013-0106-y  
Cuttle C, 2013, LIGHTING RES TECHNOL, V45, P22, DOI 10.1177/1477153512469201  
Doulos L, 2007, ELE COM ENG, P69  
Duarte C, 2013, ENERGBUILDINGS, V67, P587, DOI 10.1016/j.enbuild.2013.08.062  
Dubois MC, 2013, LIGHTING RES TECHNOL, V45, P52, DOI 10.1177/1477153511428918  
Dubois MC, 2011, ENERGBUILDINGS, V43, P2572, DOI 10.1016/j.enbuild.2011.07.001  
Escuyer S., 2001, Lighting Research and Technology, V33, P77, DOI 10.1177/136578280103300202  
Floyd D.B., 1995, FIELD COMMISSIONING  
Galasiu AD, 2006, ENERGBUILDINGS, V38, P728, DOI 10.1016/j.enbuild.2006.03.001  
Galasiu AD, 2004, SOL ENERGY, V76, P523, DOI 10.1016/j.solener.2003.12.007  
Gentile N., 2013, LIGHTING CONTROL SYS, P333  
Gentile N, 2015, 2015 IEEE 15TH INTERNATIONAL CONFERENCE ON ENVIRONMENT AND ELECTRICAL ENGINEERING (IEEE EEEIC 2015), P632, DOI 10.1109/EEEIC.2015.7165237  
Granderson J, 2010, LEUKOS, V7, P85, DOI 10.1582/LEUKOS.2010.07.02002  
Guest G, 2006, FIELD METHOD, V18, P59, DOI 10.1177/1525822X05279903  
Guo X, 2010, LIGHTING RES TECHNOL, V42, P415, DOI 10.1177/1477153510376225  
Halonen L., 1995, PUBL INT ECLAIR CIE, V119, P200  
Hobday R., 2007, LIGHT REVOLUTION HLT  
IEA, 2006, LIGHTS LAB LOST POL  
Leslie RP, 2003, BUILD ENVIRON, V38, P381, DOI 10.1016/S0360-1323(02)00118-X  
Logadottir A, 2013, PROCEEDINGS OF THE CIE CENTENARY CONFERENCE TOWARDS A NEW CENTURY OF LIGHT, P159  
Love J. A., 1998, LIGHTING RES TECHNOL, V30, P45, DOI DOI 10.1177/096032719803000107  
Maniccia D, 1999, J ILLUM ENG SOC, V28, P42, DOI 10.1080/00994480.1999.10748274  
Mardaljevic J, 2009, LIGHTING RES TECHNOL, V41, P261, DOI 10.1177/1477153509339703  
Mistrick R, 2005, LEUKOS, V1, P51, DOI 10.1582/LEUKOS.2005.01.03.004  
Pigg S., 1996, BEHAV ASPECTS LIGHTI, P161  
[Anonymous], 2015, PREN151931  
Richman EE, 1996, J ILLUM ENG SOC, V25, P83, DOI 10.1080/00994480.1996.10748136  
Robson C, 2011, REAL WORLD RES  
ROMNEY AK, 1986, AM ANTHROPOL, V88, P313, DOI 10.1525/aa.1986.88.2.02a00020  
Schweizer C, 2006, J EXPO SCI ENV EPID, V17, P170  
SMHI, 2015, SMHI OPPN DAT MET OB  
Von Neida B, 2001, J ILLUM ENG SOC, V30, P111, DOI 10.1080/00994480.2001.10748357  
Williams A, 2012, LEUKOS, V8, P161, DOI 10.1582/LEUKOS.2012.08.03.001  
Yun GY, 2012, ENERGBUILDINGS, V46, P152, DOI 10.1016/j.enbuild.2011.10.034
- NR 43  
TC 10  
Z9 10  
U1 2  
U2 9  
PU PERGAMON-ELSEVIER SCIENCE LTD  
PI OXFORD  
PA THE BOULEVARD, LANGFORD LANE, KIDLINGTON, OXFORD OX5 1GB, ENGLAND  
SN 0038-092X

J9 SOL ENERGY

J1 Sol. Energy

PD APR

PY 2016

VL 127

BP 113

EP 123

DI 10.1016/j.solener.2015.12.053

PG 11

WC Energy & Fuels

SC Energy & Fuels

GA DG3AR

UT WOS:000371942400011

DA 2018-05-03

ER

PT J

AU Rahut, DB

Behera, B

Ali, A

AF Bahadur Rahut, Dil

Behera, Bhagirath

Ali, Akhter

TI Household energy choice and consumption intensity: Empirical evidence from Bhutan

SO RENEWABLE & SUSTAINABLE ENERGY REVIEWS

LA English

DT Review

DE Energy choice; Switch; Clean energy; Firewood; Household; Bhutan

ID DEVELOPING-COUNTRIES; INDIAN HOUSEHOLDS; BIOMASS ENERGY; RESPIRATORY HEALTH; EXERGY PERFORMANCE; AIR-POLLUTION; COLD-STORAGE; FUEL CHOICE; COOKING; TRANSITION

AB This paper uses data from three Bhutan Living Standard surveys (BLSS 2003, BLSS 2007, and BLSS 2012) to examine the trends and patterns of household energy consumption, and identify and analyze the factors that influence household energy choices, consumption intensity and the per capita household expenditure on energy, sources in Bhutan. During the last decade significant numbers of Bhutanese households have switched to cleaner energy sources. Empirical results show that a household's choice of cleaner energy sources is driven by income level and household wealth, the age, gender and education of the household heads, access to electricity, and location. Education and income have a differential role on the choice of clean or dirty fuel; wealthier and more educated households use and rely more on clean sources of energy like electricity and liquid petroleum gas while poorer households use and rely on dirty fuel such as fuelwood and kerosene. The study shows that female-headed households are more likely to choose cleaner fuels and, above all, the availability of a clean and cost-effective source of energy within proximity to the household is an important factor in the adoption of clean energy. Several models using a variety of alternative independent variables, such as proxies for education and wealth, were estimated and confirmed the robustness of the results. (C) 2015 Elsevier Ltd. All rights reserved.

C1 [Bahadur Rahut, Dil] Int Maize & Wheat Improvement Ctr CIMMYT, El Batan, Mexico.

[Behera, Bhagirath] Indian Inst Technol Kharagpur, Dept Humanities & Social Sci, Kharagpur 721302, W Bengal, India.

[Ali, Akhter] CIMMYT, Socioecon Program, Islamabad, Pakistan.

RP Rahut, DB (reprint author), Int Maize & Wheat Improvement Ctr CIMMYT, 10km 45, Carretera Mex Veracruz, El Batan, Mexico.

EM dilbhutan@gmail.com

CR AGECCU, 2010, EN SUST FUT SUMM REP

Akpalu W, 2011, ENER POLICY, V39, P6525, DOI 10.1016/j.enpol.2011.07.054

Arntzen JW, 1984, BOTSWANA J AFR STUD, V4, P24

Baiyegunhi L, 2014, ENERGY SUSTAIN DEV, V20, P30

Behera B, 2015, ENERGY, V85, P468, DOI 10.1016/j.energy.2015.03.059

- Bruce N, 2000, B WORLD HEALTH ORGAN, V78, P1078  
Cayla JM, 2011, ENER POLICY, V39, P7874, DOI 10.1016/j.enpol.2011.09.036  
Daioglou V, 2012, ENERGY, V37, P601, DOI 10.1016/j.energy.2011.10.044  
DEWEES PA, 1989, WORLD DEV, V17, P1159, DOI 10.1016/0305-750X(89)90231-3  
Duflo E., 2008, Surveys and Perspectives Intergrating Environment and Society (SAPIENS), V1, P1  
Farhar BC, 1998, RENEW ENER, V15, P230, DOI 10.1016/S0960-1481(98)00164-5  
Farsi M, 2007, ENVIRON DEV ECON, V12, P757, DOI 10.1017/S1355770X07003932  
Heltberg R, 2000, LAND ECON, P213  
Heltberg R, 2005, ENVIRON DEV ECON, V10, P337, DOI 10.1017/S1355770X04001858  
Heltberg R, 2004, ENER ECON, V26, P869, DOI 10.1016/j.eneco.2004.04.018  
HILLS P, 1994, ENERGY, V19, P517, DOI 10.1016/0360-5442(94)90048-5  
Holdren J.P., 2000, ENERGY ENV HLTH  
Ingale LT, 2013, ASIA-PAC J PUBLIC HE, V25, P463, DOI 10.1177/1010539511420994  
Israel D, 2002, ECON DEV CULT CHANGE, V50, P865, DOI 10.1086/342846  
Kaygusuz K, 2012, RENEW SUST ENER REV, V16, P1116, DOI 10.1016/j.rser.2011.11.013  
Khandker SR, 2012, ENER POLICY, V47, P1, DOI 10.1016/j.enpol.2012.02.028  
LEACH G, 1975, FOOD POLICY, V1, P62, DOI 10.1016/0306-9192(75)90009-3  
LEACH G, 1992, ENER POLICY, V20, P116, DOI 10.1016/0301-4215(92)90105-B  
Lhendup T, 2010, ENERGY SUSTAIN DEV, V14, P134, DOI 10.1016/j.esd.2010.04.004  
Li G., 2013, REV THERMAL ENERGY S  
Li G, 2014, INT J REFRIG, V44, P23, DOI 10.1016/j.ijrefrig.2014.05.013  
Li G, 2014, ENERGY, V65, P675, DOI 10.1016/j.energy.2013.12.017  
Li G, 2013, ENERGY, V51, P1, DOI 10.1016/j.energy.2012.12.002  
Li G, 2012, INT J REFRIG, V35, P2053, DOI 10.1016/j.ijrefrig.2012.06.003  
Masera OR, 2000, WORLD DEV, V28, P2083, DOI 10.1016/S0305-750X(00)00076-0  
Nansaior A, 2011, BIOMASS BIOENERG, V35, P4180, DOI 10.1016/j.biombioe.2011.06.046  
Nepal M, 2011, ENVIRON DEV ECON, V16, P1, DOI 10.1017/S1355770X10000409  
Oguntoke O, 2013, INDOOR BUILT ENVIRON, V22, P528, DOI 10.1177/1420326X12444784  
Oluwole O, 2013, AIR QUAL ATMOS HLTH, V6, P553, DOI 10.1007/s11869-013-0196-9  
Ouedraogo B, 2006, ENER POLICY, V34, P3787, DOI 10.1016/j.enpol.2005.09.006  
Ozcan KM, 2013, ENER POLICY, V60, P550, DOI 10.1016/j.enpol.2013.05.046  
Pachauri S, 2004, WORLD DEV, V32, P2083, DOI 10.1016/j.worlddev.2004.08.005  
Pachauri S, 2008, ENER POLICY, V36, P4022, DOI 10.1016/j.enpol.2008.06.016  
Pandey VL, 2011, BIOMASS BIOENERG, V35, P4724, DOI 10.1016/j.biombioe.2011.09.020  
Rahut DB, 2014, ENERGY, V69, P661, DOI 10.1016/j.energy.2014.03.062  
Rao MN, 2007, ENERGY, V32, P143, DOI 10.1016/j.energy.2006.03.012  
Reddy BS, 2009, ENERGY, V34, P992, DOI 10.1016/j.energy.2009.01.004  
Rehfuess E, 2006, ENVIRON HEALTH PERSP, V114, P373, DOI 10.1289/ehp.8603  
Sanyal DK, 2000, S AFR J SCI, V96, P94  
Torres-Duque Carlos, 2008, Proc Am Thorac Soc, V5, P577, DOI 10.1513/pats.200707-100RP
- NR 45  
TC 10  
Z9 10  
U1 4  
U2 15  
PU PERGAMON-ELSEVIER SCIENCE LTD  
PI OXFORD  
PA THE BOULEVARD, LANGFORD LANE, KIDLINGTON, OXFORD OX5 1GB, ENGLAND  
SN 1364-0321  
J9 RENEW SUST ENER REV  
JI Renew. Sust. Energ. Rev.  
PD JAN  
PY 2016  
VL 53  
BP 993  
EP 1009  
DI 10.1016/j.rser.2015.09.019  
PG 17

WC GREEN & SUSTAINABLE SCIENCE & TECHNOLOGY; Energy & Fuels  
 SC Science & Technology - Other Topics; Energy & Fuels  
 GA DA4GL  
 UT WOS:000367758100069  
 DA 2018-05-03  
 ER

PT J  
 AU Ramos, A  
     Gago, A  
     Labandeira, X  
     Linares, P  
 AF Ramos, A.  
     Gago, A.  
     Labandeira, X.  
     Linares, P.

TI The role of information for energy efficiency in the residential sector  
 SO ENERGY ECONOMICS

LA English  
 DT Article

DE Energy efficiency; Information; Behavior

ID WILLINGNESS-TO-PAY; BEHAVIORAL-ENVIRONMENTAL ECONOMICS; HOUSEHOLD  
 ELECTRICITY CONSUMPTION; HOUSING-MARKET; SPLIT INCENTIVES; FIELD  
 EXPERIMENT; RATIONAL CHOICE; SAVING ENERGY; SOCIAL NORMS; GREEN

AB In spite of the large potential and existing efforts to foster energy efficiency in the residential sector, much remains to be achieved. This may be partially due to the many barriers and market failures faced by energy efficiency, which are even greater in this sector. In particular, informational failures seem to be pervasive and relevant in this area. Addressing these issues requires specific policy instruments and strategies. This paper reviews the empirical evidence on the effectiveness of such instruments, focusing on energy certificates, feedback programs, and energy audits. Results show that energy certificates and feedback programs can be effective, but only if they are carefully designed, whereas the evidence about the effectiveness of energy audits is mixed. In addition, the paper points out the large potential for new instruments as well as combinations of existing ones.

(c) 2015 Elsevier B.V. All rights reserved.

C1 [Ramos, A.; Gago, A.; Labandeira, X.] Univ Vigo, Fac CCEE, Rede, Vigo 36310, Spain.  
 [Labandeira, X.] European Univ Inst, FSR Climate, I-50014 Florence, Italy.  
 [Linares, P.] Univ Pontificia Comillas, Inst Invest Tecnol, Madrid 28015, Spain.

RP Ramos, A (reprint author), Univ Vigo, Fac CCEE, Rede, Campus Lagoas S-N, Vigo 36310, Spain.

EM anaramos@uvigo.es; agago@uvigo.es; xavier@uvigo.es;  
 pedro.linares@comillas.edu

RI Linares, Pedro/B-7999-2008

OI Linares, Pedro/0000-0002-0572-1937; Alberto, Gago/0000-0001-7964-3276

FU Spanish Ministry of Science and Innovation [ECO2013-41183-P]

FX The authors acknowledge valuable comments and suggestions by two anonymous reviewers. They are also grateful to the Spanish Ministry of Science and Innovation project ECO2013-41183-P. Yet the paper only reflects the views of the authors, who are responsible for any error or omission that may remain.

CR Abrahamse W, 2005, J ENVIRON PSYCHOL, V25, P273, DOI 10.1016/j.jenvp.2005.08.002

Achtnicht M, 2011, ECOL ECON, V70, P2191, DOI 10.1016/j.ecolecon.2011.06.026

Alberini A., 2014, 14190 CERETH

Towe C., 2015, 15208 CERETH

Alberini A, 2013, ENERG J, V34, P49, DOI 10.5547/01956574.34.1.3

Sweeney R., 2015, 008 E2E

Allcott H, 2015, AM ECON REV, V105, P2501, DOI 10.1257/aer.20131564

Allcott H, 2014, AM ECON REV, V104, P3003, DOI 10.1257/aer.104.10.3003

Allcott H, 2011, J PUBLIC ECON, V95, P1082, DOI 10.1016/j.jpubeco.2011.03.003

Allcott H, 2010, SCIENCE, V327, P1204, DOI 10.1126/science.1180775



- Aroonruengsawat A, 2012, ENERJ, V33, P31, DOI 10.5547/ISSN0195-6574-EJ-Vol33-No1-2
- Shih A., 2012, J LAW ECON ORGAN, V29, P1
- Banerjee A, 2003, ENERJ POLICY, V31, P109, DOI 10.1016/S0301-4215(02)00012-5
- Banfi S, 2008, ENERJ ECON, V30, P503, DOI 10.1016/j.eneco.2006.06.001
- Bloom B., 2011, J SUSTAINABLE REAL E, V3, P109
- Brechling V, 1994, FISCAL STUDIES, V15, P44, DOI DOI 10.1111/J.1475-5890.1994.TB00196.X
- Brounen D, 2013, ENERJ ECON, V38, P42, DOI 10.1016/j.eneco.2013.02.008
- Brounen D, 2011, J ENVIRON ECON MANAG, V62, P166, DOI 10.1016/j.jeem.2010.11.006
- Brown Z, 2013, ENERJ ECON, V39, P128, DOI 10.1016/j.eneco.2013.04.011
- Bull J, 2012, ENERJ POLICY, V50, P242, DOI 10.1016/j.enpol.2012.07.001
- Cajias M, 2013, J CORP REAL ESTATE, V15, P53, DOI 10.1108/JCRE-12-2012-0031
- Chau CK, 2010, BUILD ENVIRON, V45, P2553, DOI 10.1016/j.buildenv.2010.05.017
- Chegut A, 2013, URBAN STUD, P1
- Soderberg M., 2014, 6 ATL WORKSH EN ENV
- Adela Conchado, 2012, HDB NETWORKS POWER S
- Kahn M., 2010, 1597 NBER
- Costa DL, 2013, J EUR ECON ASSOC, V11, P680, DOI 10.1111/jeea.12011
- Croson R, 2014, ENVIRON RESOUR ECON, V58, P335, DOI 10.1007/s10640-014-9783-y
- Darby S., 2006, REV DEFRA LIT METERI
- Ziobrowski A., 2011, J SUSTAINABLE REAL E, V3, P2
- Davis Lucas W., 2012, DESIGN IMPLEMENTATIO
- Davis Lucas W., 2014, 20720 NBER
- DellaVigna S, 2009, J ECON LIT, V47, P315, DOI 10.1257/jel.47.2.315
- Deng YH, 2012, REG SCI URBAN ECON, V42, P506, DOI 10.1016/j.regsciurbeco.2011.04.004
- Deutsch M, 2010, J IND ECOL, V14, P103, DOI 10.1111/j.1530-9290.2009.00201.x
- Di Maria C, 2008, SCOTTISH J POLITICAL, V57, P48
- Dyner I, 2004, SYST RES BEHAV SCI, V21, P373, DOI 10.1002/sres.644
- Ehrhardt-Martinez K., 2010, E105 AM COUNC EN EFF
- Eichholtz P, 2013, REV ECON STAT, V95, P50, DOI 10.1162/REST\_a\_00291
- Eichholtz P, 2010, AM ECON REV, V100, P2492, DOI 10.1257/aer.100.5.2492
- Erdem C, 2010, ENERJ POLICY, V38, P3038, DOI 10.1016/j.enpol.2010.01.043
- Eskeland G, 1996, TAXING BADS TAXING G
- European Commission, 2013, COM2013225 EUR COMM
- European Parliament, 2014, 20132135INI EUR PARL
- Farsi M, 2010, ENERJ POLICY, V38, P3078, DOI 10.1016/j.enpol.2010.01.048
- Faruqui A, 2010, ENERGY, V35, P1598, DOI 10.1016/j.energy.2009.07.042
- Fischer C, 2008, ENERJ EFFIC, V1, P79, DOI 10.1007/s12053-008-9009-7
- Fowlie M., 2015, 016 E2E
- Frederiks ER, 2015, RENEW SUST ENERJ REV, V41, P1385, DOI 10.1016/j.rser.2014.09.026
- Frondel M., 2012, ENVIRON RESOUR ECON, V55, P407
- Fuerst F, 2011, ENERJ POLICY, V39, P6608, DOI 10.1016/j.enpol.2011.08.005
- Fuerst F, 2011, ECOL ECON, V70, P1220, DOI 10.1016/j.econ.2011.01.026
- Fuerst F, 2011, REAL ESTATE ECON, V39, P45, DOI 10.1111/j.1540-6229.2010.00286.x
- Gago A., 2013, HDB ENERGY CLIMATE C
- Galarraga I, 2014, TRANSPORT POLICY, V36, P272, DOI 10.1016/j.tranpol.2014.09.003
- Galarraga I, 2011, ENERJ ECON, V33, p566, DOI 10.1016/j.eneco.2011.07.028
- Gallagher KS, 2011, J ENVIRON ECON MANAG, V61, P1, DOI 10.1016/j.jeem.2010.05.004
- Gans W, 2013, ENERJ ECON, V36, P729, DOI 10.1016/j.eneco.2012.11.022
- Gillingham K, 2006, ANNU REV ENV RESOUR, V31, P161, DOI 10.1146/annurev.energy.31.020105.100157
- Gillingham K, 2014, REV ENV ECON POLICY, V8, P18, DOI 10.1093/reep/ret021
- Gillingham K, 2012, ENERJ, V33, P37, DOI 10.5547/01956574.33.2.3
- Gillingham K, 2009, ANNU REV RESOUR ECON, V1, P597, DOI 10.1146/annurev.resource.102308.124234
- Gleerup M, 2010, ENERJ, V31, P113
- Greene DL, 2011, ENERJ ECON, V33, P608, DOI 10.1016/j.eneco.2010.08.009
- Grosche P, 2009, ENERJ, V30, P135
- Hogberg L, 2013, J EUR REAL ESTATE RE, V6, P242, DOI 10.1108/JERER-09-2012-0024
- Houde Sebastien, 2014, WORKING PAPER
- Houde S., 2014, 20019 NBER

- Houde S, 2013, ENER G J, V34, P87, DOI 10.5547/01956574.34.1.4
- Hyland M, 2013, ENER G ECON, V40, P943, DOI 10.1016/j.eneco.2013.07.020
- IEA (International Energy Agency), 2013, TRANS SUST BUILD STR
- IEA, 2007, MIND GAP QUANT PRINC
- IEA, 2010, EN PERF CERT BUILD P
- Ito K., 2015, 017 E2E
- Iwano J, 2010, ENER G POLICY, V38, P7744, DOI 10.1016/j.enpol.2010.08.027
- Jacobsen GD, 2013, REV ECON STAT, V95, P34, DOI 10.1162/REST\_a\_00243
- JAFFE AB, 1994, ENER G POLICY, V22, P804, DOI 10.1016/0301-4215(94)90138-4
- Jaffe A. B., 2004, ENCY ENERGY, V2, P79, DOI [10.1016/B0-12-176480-X/00228-X, DOI 10.1016/B0-12-176480-X/00228-X]
- Jessoe K, 2014, AM ECON REV, V104, P1417, DOI 10.1257/aer.104.4.1417
- Kaenzig J, 2010, J IND ECOL, V14, P121, DOI 10.1111/j.1530-9290.2009.00195.x
- Kahn M., 2009, BE J ECON ANAL POLI, V9
- Kahn ME, 2014, REG SCI URBAN ECON, V47, P25, DOI 10.1016/j.regsciurbeco.2013.07.001
- KAHNEMAN D, 1979, ECONOMETRICA, V47, P263, DOI 10.2307/1914185
- Kahneman D, 2011, THINKING FAST SLOW
- Kallbekken Steffen, 2013, Journal of Consumer Policy, V36, P1, DOI 10.1007/s10603-012-9211-z
- Kok N, 2012, ENER G POLICY, V46, P489, DOI 10.1016/j.enpol.2012.04.015
- Kotchen MJ, 2007, J ENVIRON ECON MANAG, V53, P1, DOI 10.1016/j.jeem.2006.06.003
- Kwak SY, 2010, ENER G POLICY, V38, P673, DOI 10.1016/j.enpol.2009.09.022
- Lange I, 2014, ECOL ECON, V107, P76, DOI 10.1016/j.ecolecon.2014.07.021
- Levinson A, 2004, RESOUR ENERGY ECON, V26, P51, DOI [10.1016/S0928-7655(03)00047-2, 10.1016/S0928-7655(03)00047-2]
- Levinson Arik, 2014, 20797 NBER
- Linares P, 2010, J ECON SURV, V24, P573, DOI 10.1111/j.1467-6419.2009.00609.x
- LOOMES G, 1982, ECON J, V92, P805, DOI 10.2307/2232669
- Mahenc P, 2007, ENVIRON RESOUR ECON, V38, P461, DOI 10.1007/s10640-007-9084-9
- Markandya A, 2015, GREEN ENERGY EFFICIE
- Maruejols L, 2011, ENER G POLICY, V39, P3655, DOI 10.1016/j.enpol.2011.03.072
- Mlecnik E, 2010, ENER G POLICY, V38, P4592, DOI 10.1016/j.enpol.2010.04.015
- Mourato S, 2004, ENER G POLICY, V32, P685, DOI 10.1016/S0301-4215(02)00335-X
- Mullainathan S., 2000, 0027 MIT DEP EC
- Nair G, 2010, APPL ENER G, V87, P2411, DOI 10.1016/j.apenergy.2010.02.004
- Nair G, 2010, ENER G POLICY, V38, P2956, DOI 10.1016/j.enpol.2010.01.033
- Giraudet L.G., 2015, 201511 FAERE
- Newell RG, 2014, J ASSOC ENVIRON RESO, V1, P555, DOI 10.1086/679281
- Newsham GR, 2009, ENER G BUILDINGS, V41, P897, DOI 10.1016/j.enbuild.2009.03.014
- Nolan JM, 2008, PERS SOC PSYCHOL B, V34, P913, DOI 10.1177/0146167208316691
- OECD, 2003, ENV SUST BUILD CHALL
- Palmer K., 2011, 1142 DP RES FUT
- Qiu YM, 2014, ECOL ECON, V107, P216, DOI 10.1016/j.ecolecon.2014.09.002
- Ramos A., 2015, 012015 EC EN
- Reichardt A, 2012, J REAL ESTATE RES, V34, P99
- Gonzalez ABR, 2012, ENER G POLICY, V51, P417, DOI 10.1016/j.enpol.2012.08.050
- ROSEN S, 1974, J POLIT ECON, V82, P34, DOI 10.1086/260169
- Ryan L, 2011, ENERGY EFFICIENCY PO
- Sammer K, 2006, BUSINESS STRATEGY EN, V15, P185, DOI DOI 10.1002/BSE.522
- Schleich J, 2008, ENER G ECON, V30, P449, DOI 10.1016/j.eneco.2006.08.004
- Schleich J, 2013, ENER G POLICY, V61, P1097, DOI 10.1016/j.enpol.2013.05.012
- Schultz PW, 2007, PSYCHOL SCI, V18, P429, DOI 10.1111/j.1467-9280.2007.01917.x
- Scott S, 1997, ENER G ECON, V19, P187, DOI 10.1016/S0140-9883(96)01000-6
- Shen J, 2009, J ENVIRON MANAGE, V90, P3561, DOI 10.1016/j.jenvman.2009.06.010
- Shogren JF, 2008, REV ENV ECON POLICY, V2, P26, DOI 10.1093/reep/rem027
- Simon HA, 1955, Q J ECON, V69, P99, DOI 10.2307/1884852
- Sorrell Steve, 2004, EC ENERGY EFFICIENCY
- Staats H, 2004, ENVIRON BEHAV, V36, P341, DOI 10.1177/0013916503260163
- Stavins Robert, 2013, EC PERSPECTIVE BUILD

Stern P., 1987, ENERGY, V12, P339  
 Thaler R. H., 2008, NUDGE IMPROVING DECI  
 Tietenberg T, 2009, REV ENV ECON POLICY, V3, P304, DOI 10.1093/reep/rep004  
 Urge-Vorsatz D, 2008, ENER POLICY, V36, P642, DOI 10.1016/j.enpol.2007.10.009  
 Wall M., 2013, 1318 DP RES FUT  
 Wallander S, 2008, YAL ENV EC SEM  
 Ward DO, 2011, ENER POLICY, V39, P1450, DOI 10.1016/j.enpol.2010.12.017  
 Wiley JA, 2010, J REAL ESTATE FINANC, V41, P228, DOI 10.1007/s11146-008-9142-2  
 WILLIAMSON OE, 1981, AM J SOCIOL, V87, P548, DOI 10.1086/227496  
 Sugiura A., 2011, 23124 MPRA  
 Zheng SQ, 2012, EUR ECON REV, V56, P974, DOI 10.1016/j.eurocorev.2012.02.012

NR 135

TC 10

Z9 11

U1 4

U2 35

PU ELSEVIER SCIENCE BV

PI AMSTERDAM

PA PO BOX 211, 1000 AE AMSTERDAM, NETHERLANDS

SN 0140-9883

EI 1873-6181

J9 ENER ECON

J1 Energy Econ.

PD DEC

PY 2015

VL 52

SU 1

SI SI

BP S17

EP S29

DI 10.1016/j.eneco.2015.08.022

PG 13

WC Economics

SC Business & Economics

GA DA5QX

UT WOS:000367858700003

DA 2018-05-03

ER

PT J

AU Barnicoat, G

Danson, M

AF Barnicoat, Greta

Danson, Mike

TI The ageing population and smart metering: A field study of householders'

attitudes and behaviours towards energy use in Scotland

SO ENERGY RESEARCH & SOCIAL SCIENCE

LA English

DT Article

DE Smart meters; Older people; Fuel poverty; Attitudes and behaviours

ID FUEL POVERTY; TECHNOLOGY; ADOPTION; DEMAND; HOMES; POOR; COLD

AB Smart grids, smart metering and in-home displays (IHD) are expected to contribute to demand side management partly by increasing user knowledge whilst improving comfort, safety and the ability to cope with increasing costs. With an increasingly ageing population, the awareness and views of older people on energy use, technology, smart meters, smart grids are becoming progressively more important. Their behaviours regarding energy and technology use differ from the majority as they are usually living on low incomes and are at risk of fuel poverty. It is therefore important to understand their acceptance, engagement or resistance to smart metering, IHDs and external control of home appliances and heating.

Their willingness and capacity to change time- use behaviours and reduce consumption is crucial. A study of older tenants in rural Scotland is presented. Sensors and IHDs were installed to measure and display electricity costs and consumption of large appliances and the electricity supply for each house, and show internal household and external temperatures. Householder's use of energy, habits and routine, strategies for keeping warm and attitudes towards technology, smart metering, IHDs and direct external control of appliances and heating were explored through interviews. Conclusions identify significant implications for future research and policy. (C) 2015 Elsevier Ltd. All rights reserved.

C1 [Barnicoat, Greta; Danson, Mike] Heriot Watt Univ, Edinburgh, Midlothian, Scotland.

RP Danson, M (reprint author), Heriot Watt Univ, Sch Management & Languages, Doctoral Programmes, Edinburgh EH14 4AS, Midlothian, Scotland.

EM Gcameron5@hotmail.com; M.danson@hw.ac.uk

FU EPSRC (Environment and Physical Science Research Council) [EP/K002708/1]

FX The research was funded by the EPSRC (Environment and Physical Science Research Council) Grant number: EP/K002708/1. Our thanks to two anonymous referees and the editors of this special issue for the feedback and critical comments which have improved the paper, any remaining errors are our own.

CR Age UK, 2011, TECHN OLD PEOPLE

Anderson W, 2012, ENERGY POLICY, V49, P40, DOI 10.1016/j.enpol.2012.01.002

Atanasiu B., 2014, INVESTING LIORNE REN

Balta-Ozkan N, 2014, TECHNOLOGICAL STRATEG, V26, P1176, DOI 10.1080/09537325.2014.975788

Balta-Ozkan N, 2013, ENERGY POLICY, V63, P363, DOI 10.1016/j.enpol.2013.08.043

Boardman B, 2012, ENERGY POLICY, V49, P143, DOI 10.1016/j.enpol.2012.02.035

Buchanan K., 2015, ENERGY POLICY, V77

Burgess J, 2008, ENERGY POLICY, V36, P4454, DOI 10.1016/j.enpol.2008.09.039

[Anonymous], 2011, IND AG ND OLD PEOPLE

Committee on Climate Change, 2014, RED EM SCOTL 2014 PR

Darby S, 2010, BUILD RES INF, V38, P442, DOI 10.1080/09613218.2010.492660

Darby SJ, 2012, ENERGY POLICY, V49, P759, DOI 10.1016/j.enpol.2012.07.026

Darby SJ, 2012, ENERGY POLICY, V49, P98, DOI 10.1016/j.enpol.2011.11.065

Day R, 2011, HEALTH PLACE, V17, P885, DOI 10.1016/j.healthplace.2011.04.011

DECC, 2013, FUEL POVERTY REP

Demiris G, 2008, Yearb Med Inform, P33

EAS (Energy Action Scotland), 2014, FUEL POVERTY HLTH

Energy Saving Trust, 2012, POW NAT HOUS EL US H

Faruqui A, 2010, ENERGY, V35, P1598, DOI 10.1016/j.energy.2009.07.042

Fatuqui F., 2010, ENERGY POLICY, V38

Gurguc Z., 2013, EXPLORING BEHAV SCI

Hamza N., ENERGY POLICY, V39

Hardill I, 2012, GEOFORUM, V43, P1306, DOI 10.1016/j.geoforum.2012.03.016

Hargreaves T, 2013, ENERGY POLICY, V52, P126, DOI 10.1016/j.enpol.2012.03.027

Hargreaves T, 2010, ENERGY POLICY, V38, P6111, DOI 10.1016/j.enpol.2010.05.068

Healy JD, 2003, J EPIDEMIOL COMMUN H, V57, P784, DOI 10.1136/jech.57.10.784

Hills J, 2012, GETTING MEASURE FUEL

Lorenc A, 2013, PUBLIC HEALTH, V127, P894, DOI 10.1016/j.puhe.2013.07.004

MacKerron G, 2012, ENERGY POLICY, V49, P1, DOI 10.1016/j.enpol.2012.03.005

Matlabi H, 2012, SOC BEHAV PERSONAL, V40, P293, DOI 10.2224/sbp.2012.40.2.293

Mills B, 2012, ENERGY POLICY, V49, P616, DOI 10.1016/j.enpol.2012.07.008

National Energy Action and Energy Action Scotland, 2013, UK FUEL POVERTY MON 2013

National Records of Scotland (NRS), 2012, DUMFRIE GALL COUNCIL AR

National Records of Scotland (NRS), 2014, PROJ POP SCOTL 2012

Office for National Statistics (ONS), 2013, NATL POP PROJ 2012 B

Office for National Statistics (ONS), 2014, INT ACC HOUS IND

O'Sullivan K., 2014, CITIES SOC, V13, P182

Pragnell M., 2000, MARKET POTENTIAL SMA

Preston I., 2013, DISTRIBUTION CARBON

Public Health England, 2014, MIN HOM TEMP THRESH

Roberts S, 2008, ENERGY POLICY, V36, P4471, DOI 10.1016/j.enpol.2008.09.025

Scottish Fuel Poverty Forum, 2012, REV SCOTT GOV FUEL P  
 Scottish Fuel Poverty Forum, 2008, 2016 FUT FUEL POV PO  
 Scottish Housing Conditions Survey (SHCS), 2012, FUEL POV EV REV DEF  
 Scottish Housing Conditions Survey (SHCS), 2013, KEY FIND 2012  
 Shove E., 2003, COM FORT CLEANLINESS  
 Shove E., 2014, THEOR CULT SOC, V31, P41, DOI 10.1177/0263276414536746  
 Steventon A., 2013, AGE AGEING  
 Stirengers Y., 2013, SMART ENERGY TECHNOL  
 Strauss W., 2011, J RETAIL CONSUM SERV, V18, P548  
 Teh P., 2014, MANAGE DATA SYS, V114, P484  
 United Nations, 2009, WORLD POP AG 2009  
 van Hoof J., 2011, INT J MED INFORM, V80, P310, DOI 10.1016/j.ijmedinf.2011.02.010  
 Verbong GPJ., 2013, ENERG POLICY, V52, P117, DOI 10.1016/j.enpol.2012.05.003  
 Wagner N., 2010, COMPUT HUM BEHAV, V26, P870, DOI 10.1016/j.chb.2010.03.029  
 Walker G., 2012, ENERG POLICY, V49, P69, DOI 10.1016/j.enpol.2012.01.044  
 World Health Organisation (WHO), 2012, FACTS AB AG  
 Young R., 2014, HLTH INF J, V20, P2

NR 58

TC 10

Z9 10

U1 0

U2 1

PU ELSEVIER SCIENCE BV

PI AMSTERDAM

PA PO BOX 211, 1000 AE AMSTERDAM, NETHERLANDS

SN 2214-6296

EI 2214-6326

J9 ENERGY RES SOC SCI

JI Energy Res. Soc. Sci.

PD SEP

PY 2015

VL 9

SI SI

BP 107

EP 115

DI 10.1016/j.erss.2015.08.020

PG 9

WC Environmental Studies

SC Environmental Sciences &amp; Ecology

GA V3Y6B

UT WOS:000218705200011

DA 2018-05-03

ER

PT J

AU Diaz-Rainey, I

Ashton, JK

AF Diaz-Rainey, Ivan

Ashton, John K.

TI Investment inefficiency and the adoption of eco-innovations: The case of household energy efficiency technologies

SO ENERGY POLICY

LA English

DT Article

DE Eco-innovation; Investment inefficiency; Energy efficiency; Innovation adoption; Innovation diffusion; Efficiency gap

ID UK HOUSEHOLDS; INDUCED DIFFUSION; SOCIAL NETWORKS; MODEL; REGRESSION; MARKET; POLICY

AB This paper examines the factors determining household adoption of energy efficiency eco-innovations. We do so by testing hypotheses grounded in diffusion and finance theory and the literature on the barriers to energy efficiency. Using two large surveys of UK households, we explore the adoption of nine technologies. Our results indicate 'investment inefficiency' amongst household adopters occurs for two reasons. First, contrary to notions of rational choice, we find a negative relationship between the investment return of technologies and their level of diffusion. Second, we show adopters of these technologies display characteristics broadly consistent with diffusion theory, contradicting the prediction of finance theory that investment return, not individual characteristics, should drive adoption. We also find that policy has played a role in inducing the diffusion of these technologies and that tenure and spill-over effects are important in adoption. Finally, adoption is motivated more by a desire to save money than by environmental concern. We conclude by giving examples of how our research can lead to better policy timing and targeting. (c) 2015 Elsevier Ltd. All rights reserved:

C1 [Diaz-Rainey, Ivan] Univ Otago, Sch Business, Dunedin, New Zealand.

[Ashton, John K.] Bangor Univ, Bangor Business Sch, Bangor, Gwynedd, Wales.

CR Diaz-Rainey, I (reprint author), Univ Otago, Sch Business, Dunedin, New Zealand.

EM ivan.diaz-rainey@ag.ac.nz

OI Ashton, john/0000-0002-1132-0857

CR Allcott H, 2012, J ECON PERSPECT, V26, P3, DOI 10.1257/jep.26.1.3

Bale CSE, 2013, ENERG POLICY, V63, P833, DOI 10.1016/j.enpol.2013.09.033

BASS FM, 1969, MANAGE SCI, V15, P215, DOI 10.1287/mnsc.15.5.215

Brown MA, 2001, ENERG POLICY, V29, P1197, DOI 10.1016/S0301-4215(01)00067-2

Caird S, 2008, INT J INNOV MANAG, V12, P327, DOI 10.1142/S1363919608002072

Caird S, 2008, ENERG EFFIC, V1, P149, DOI 10.1007/s12053-008-9013-y

Cordes C, 2014, ECOL ECON, V97, P191, DOI 10.1016/j.ecolecon.2013.11.013

Coxe S, 2009, J PERS ASSESS, V91, P121, DOI 10.1080/00223890802634175

Davies SW, 2011, TECHNOL FORECAST SOC, V78, P1227, DOI 10.1016/j.techfore.2011.03.012

Davis L.W., 2010, 16114 NBER

DeCanio SJ, 1998, REV ECON STAT, V80, P95, DOI 10.1162/003465398557366

Diaz-Rainey I, 2012, TECHNOL FORECAST SOC, V79, P1693, DOI 10.1016/j.techfore.2012.05.012

Diaz-Rainey I., 2009, WORKING PAPER

Diaz-Rainey I., 2009, P 6 EUR OP EN MARK E

Enkvist P.A., 2007, MCKINSEY Q, V1, P35

EU Commission, 2007, EN CHANG WORLD EN PO

Golove W. H., 1996, LBL38059 U CAL EN EN

Greene W. H., 2003, ECONOMETRIC ANAL

Hosmer DW, 1997, STAT MED, V16, P965

Jaffe AB, 2002, ENVIRON RESOUR ECON, V22, P41, DOI 10.1023/A:1015519401088

MAHAJAN V, 1990, J MARKETING RES, V27, P37, DOI 10.2307/3172549

McMichael M, 2013, ENERG POLICY, V53, P159, DOI 10.1016/j.enpol.2012.10.039

Menard S., 2002, APPL LOGISTIC REGRES

Mills B, 2012, ENERG POLICY, V49, P616, DOI 10.1016/j.enpol.2012.07.008

Murray AG, 2011, ENERG ECON, V33, P1103, DOI 10.1016/j.eneco.2011.04.013

Nair G, 2010, ENERG POLICY, V38, P2956, DOI 10.1016/j.enpol.2010.01.033

Office of National Statistics (ONS), 2001, CENS 2001

Rixen M, 2014, TECHNOL FORECAST SOC, V85, P153, DOI 10.1016/j.techfore.2013.08.011

Rogers EM, 1995, DIFFUSION INNOVATION

Howarth R., 1994, ENERG POLICY, V10, P811

Sanstad A. H., 1995, ENERG POLICY, V23, P730

Schleich J, 2009, ECOL ECON, V68, P2150, DOI 10.1016/j.ecolecon.2009.02.008

Shorrocks L, 2003, DOMESTIC ENERGY FACT

Shorrocks L, 2005, REDUCING CARBON EMIS

Tovar MA, 2012, ENERG POLICY, V50, P723, DOI 10.1016/j.enpol.2012.08.019

Utleij JI, 2006, DOMESTIC ENERGY FACT

Zhao TT, 2012, ENERG POLICY, V47, P291, DOI 10.1016/j.enpol.2012.04.070

NR 37

TC 10

Z9 10

U1 4

U2 41  
PU ELSEVIER SCI LTD  
PI OXFORD  
PA THE BOULEVARD, LANGFORD LANE, KIDLINGTON, OXFORD OX5 1GB, OXON, ENGLAND  
SN 0301-4215  
EI 1873-6777  
J9 ENERG POLICY  
JI Energy Policy  
PD JUL  
PY 2015  
VL 82  
BP 105  
EP 117  
DI 10.1016/j.enpol.2015.03.003  
PG 13  
WC Economics; Energy & Fuels; Environmental Sciences; Environmental Studies  
SC Business & Economics; Energy & Fuels; Environmental Sciences & Ecology  
GA CJ3EX  
UT WOS:000355367300010  
DA 2018-05-03  
ER

PT J

AU Liu, WL

Zhang, JY

Bluemling, B

Mol, APJ

Wang, C

AF Liu, Wenling

Zhang, Jinyun

Bluemling, Bettina

Mol, Arthur P. J.

Wang, Can

TI Public participation in energy saving retrofitting of residential buildings in China

SO APPLIED ENERGY

LA English

DT Article

DE Residential building retrofit; Public participation; Energy saving performance; Energy technology; Behavior

ID NORTHERN HEATING REGION; EFFICIENCY RETROFIT; BUILT ENVIRONMENT; POLICY

AB Retrofitting existing residential buildings has been claimed as one crucial way to reduce energy consumption and greenhouse gas emissions within the Chinese residential sector. In China's government-dominated retrofitting projects, the participation of residents is often neglected. The objective of this paper is to assess the influence level of public participation (before, during and after retrofit) on energy saving by comparing three Beijing neighborhoods with different retrofitting models: a central government-led model, a local government-led model, and an old neighborhood retrofit Model. In the three cases data were collected through interviews with neighborhood workers and residents. The results show that residents' involvement in pre-retrofit activities, in technology selection and in the use of technology differs greatly among the three cases. This study concludes that in order to improve the effectiveness of energy saving interventions, the motives, intentions and living habits of residents need to be given more consideration when designing and implementing retrofitting. By highlighting the importance of public participation this paper contributes to energy saving policy development in China. (C) 2015 Elsevier Ltd. All rights reserved.

C1 [Liu, Wenling; Zhang, Jinyun; Wang, Can] Tsinghua Univ, State Key Joint Lab Environm Simulat & Pollut Con, Sch Environm, Beijing 100084, Peoples R China.

[Liu, Wenling; Zhang, Jinyun; Bluemling, Bettina; Mol, Arthur P. J.] Wageningen Univ, Environm Policy Grp, NL-6700 AP Wageningen, Netherlands.

- [Bluemling, Bettina] Leibniz Inst Agr Dev Transit Econ IAMO, Halle, Germany.  
 RP Wang, C (reprint author), Tsinghua Univ, Room 1004, Beijing 100084, Peoples R China.  
 EM canwang@tsinghua.edu.cn  
 RI Bluemling, Bettina/L-8848-2017  
 FU National Natural Science Foundation of China [71273153]; Wageningen  
 University, the Netherlands  
 FX The research was financially supported by National Natural Science  
 Foundation of China project (No.71273153) and Wageningen University, the  
 Netherlands. This research was carried out in the framework of the  
 Wageningen University sandwich PhD program.
- CR Andersen RV, 2009, ENER BUILDINGS, V41, P11, DOI 10.1016/j.enbuild.2008.07.004  
 Bao LL, 2012, ENER POLICY, V45, P521, DOI 10.1016/j.enpol.2012.02.065  
 Beijing Municipal Commission of Housing and Urban-Rural Development (BMCHURD), 2011, 27  
 BMCHURD  
 Chu JY, 2009, WATER RESOUR MANAG, V23, P3267, DOI 10.1007/s11269-009-9433-2  
 Cirman A, 2011, WORKSH 11 HOUS REG M  
 Ding Y, 2010, HV AC, V40, P19  
 Gaudio P, 2013, ANN NY ACAD SCI, V1295, P26, DOI 10.1111/nyas.12162  
 Glad W, 2012, BUILD RES INF, V40, P274, DOI 10.1080/09613218.2012.690955  
 Kong XF, 2012, ENER POLICY, V41, P624, DOI 10.1016/j.enpol.2011.11.024  
 Langevin J, 2013, APPL ENER, V102, P1358, DOI 10.1016/j.apenergy.2012.07.003  
 Li DY, 2009, ENER POLICY, V37, P2113, DOI 10.1016/j.enpol.2008.11.036  
 Liu WL, 2014, J RURAL STUD, V35, P80, DOI 10.1016/j.jrurstud.2014.04.005  
 Liu WL, 2013, APPL ENER, V102, P1187, DOI 10.1016/j.apenergy.2012.06.057  
 Liu WL, 2012, FRONT ENV SCI ENG, V6, P373, DOI 10.1007/s11783-011-0338-y  
 Liu YM, 2013, ENER BUILDINGS, V61, P61, DOI 10.1016/j.enbuild.2013.01.033  
 Lv SL, 2009, ENER POLICY, V37, P2102, DOI 10.1016/j.enpol.2008.11.042  
 Lv SL, 2009, ENER POLICY, V37, P2098, DOI 10.1016/j.enpol.2008.11.039  
 McEwen, 2012, THESIS MIT  
 Ministry of Housing and Urban-Rural Development of the People's Republic of China (MOHURD), 2010,  
 REP EN EFF RETR EX R, P28  
 Ministry of Housing and Urban-Rural Development of the People's Republic of China (MOHURD), 2012,  
 72 MOHURD  
 NBSC (National Bureau of Statistics of China), 2011, CHIN EN STAT YB 2010  
 Seyfang G, 2010, ENER POLICY, V38, P7624, DOI 10.1016/j.enpol.2009.10.027  
 Southwell B, 2014, ENERGY RES SOC SCI, V4, P21, DOI 10.1016/j.erss.2014.08.003  
 Southwell BG, 2014, ENERGY RES SOC SCI, V2, P59, DOI 10.1016/j.erss.2014.03.019  
 Valciukas S, 2012, THESIS KTH  
 Wang C, 2014, ENER POLICY, V73, P47, DOI 10.1016/j.enpol.2014.05.041  
 Wang C, 2013, ENER ENVIRON-UK, V24, P1347, DOI 10.1260/0958-305X.24.7-8.1347  
 Xu P, 2013, ENER POLICY, V52, P667, DOI 10.1016/j.enpol.2012.10.029  
 Yan D, 2011, ENER POLICY, V39, P4675, DOI 10.1016/j.enpol.2011.07.004  
 Yao RM, 2005, RENEW ENER, V30, P1973, DOI 10.1016/j.renene.2005.01.013
- NR 30  
 TC 10  
 Z9 11  
 U1 2  
 U2 22  
 PU ELSEVIER SCI LTD  
 PI OXFORD  
 PA THE BOULEVARD, LANGFORD LANE, KIDLINGTON, OXFORD OX5 1GB, OXON, ENGLAND  
 SN 0306-2619  
 EI 1872-9118  
 J9 APPL ENER  
 JI Appl. Energy  
 PD JUN 1  
 PY 2015  
 VL 147



BP 287  
 EP 296  
 DI 10.1016/j.apenergy.2015.02.090  
 PG 10  
 WC Energy & Fuels; Engineering, Chemical  
 SC Energy & Fuels; Engineering  
 GA CH1BB  
 UT WOS:000353755000026  
 DA 2018-05-03  
 ER

PT S

AU Khansari, N  
 Mostashari, A  
 Mansouri, M

AF Khansari, Nasrin  
 Mostashari, Ali  
 Mansouri, Mo

BE Madni, AM  
 Boehm, B

TI Conceptual Modeling of the Impact of Smart Cities on Household Energy Consumption

SO 2014 CONFERENCE ON SYSTEMS ENGINEERING RESEARCH

SE Procedia Computer Science

LA English

DT Proceedings Paper

CT Conference on Systems Engineering Research

CY MAR 20-22, 2014

CL Redondo Beach, CA

DE Smart city; Information and Communication Technology; Energy Behavior; Behavior Change; Conceptual Systems Model; CLIOS Model

ID SOCIAL COGNITIVE THEORY; BEHAVIOR-CHANGE; INFORMATION

AB Smart cities provide citizens with information on various urban services and allow them to track the impact of their resource consumption on the overall sustainability of their city. The premise of smart cities is that with improved access to information on resource consumption, residents make better use of those resources, resulting in increased sustainability of the city.

This paper explores the influence of the smart city technologies on individuals' resource consumption behavior, in particular on energy consumption, aiming at achieving environmentally sustainable development. This approach combines systems thinking with existing social science theories, such as cognitive and learning theories, to explore the impact of smart city information on individual decision-making and behavioral change. Using a CLIOS (complex, large-scale, interconnected, open, and sociotechnical) model, a conceptual soft systems model, the paper explores the impact of smart city technologies on behavioral change of households with regards to energy consumption. (C) 2014 The Authors. Published by Elsevier B.V.

C1 [Khansari, Nasrin; Mostashari, Ali; Mansouri, Mo] Stevens Inst Technol, Sch Syst & Enterprises, Hoboken, NJ 07030 USA.

RP Khansari, N (reprint author), Stevens Inst Technol, Sch Syst & Enterprises, Hoboken, NJ 07030 USA.

EM nkhansar@stevens.edu; amostash@stevens.edu; mo.mansouri@stevens.edu

CR Abrahamse W, 2007, J ENVIRON PSYCHOL, V27, P265, DOI 10.1016/j.jenvp.2007.08.002

Baldwin AS, 2006, HEALTH PSYCHOL, V25, P626, DOI 10.1037/0278-6133.25.5.626

BANDURA A, 1991, ORGAN BEHAV HUM DEC, V50, P248, DOI 10.1016/0749-5978(91)90022-L

Bandura A, 2001, ANNU REV PSYCHOL, V52, P1, DOI 10.1146/annurev.psych.52.1.1

Brechin S. R., 2003, INT J SOCIOLOGY SOCI, V3

CARAGLIU A., 2011, NETWORK IND Q, V13, P3

Chetty M., 2008, P 10 INT C UB COMP U, P242, DOI DOI 10.1145/1409635.1409668

Ek K, 2010, ENERG POLICY, V38, P1578, DOI 10.1016/j.enpol.2009.11.041

Froehlich J., 2009, P HCIC WORKSH, V9, P515

HE HA, 2010, P 28 INT C HUM FACT, P927, DOI DOI 10.1145/1753326.1753464

Heimlich JE, 2008, ENVIRON EDUC RES, V14, P215, DOI 10.1080/13504620802148881  
 Holloway Aisha, 2002, Int J Nurs Pract, V8, P106  
 Mathews J, 2007, ENERG POLICY, V35, P4247, DOI 10.1016/j.enpol.2007.02.031  
 Naphade M., 2011, ANNU REV ENV RESOUR, V44, P32  
 Oreg S, 2003, J APPL PSYCHOL, V88, P680, DOI 10.1037/0021-9010.88.4.680  
 Sharma A., 2010, SUSTAINABLE URBANIZA  
 Sussman J., 2007, COURSE MAT ESD 04J F  
 Thogersen J, 2010, ENERG POLICY, V38, P7732, DOI 10.1016/j.enpol.2010.08.025  
 Vlek C, 2007, J SOC ISSUES, V63, P1, DOI 10.1111/j.1540-4560.2007.00493.x  
 Wilson C, 2007, ANNU REV ENV RESOUR, V32, P169, DOI 10.1146/annurev.energy.32.053006.141137  
 ZIMBARDO P., 1969, INFLUENCING ATTITUDE

NR 21

TC 10

Z9 10

U1 0

U2 5

PU ELSEVIER SCIENCE BV

PI AMSTERDAM

PA SARA BURGERHARTSTRAAT 25, PO BOX 211, 1000 AE AMSTERDAM, NETHERLANDS

SN 1877-0509

J9 PROCEDIA COMPUT SCI

PY 2014

VL 28

BP 81

EP 86

DI 10.1016/j.procs.2014.03.011

PG 6

WC Computer Science, Information Systems; Computer Science, Software  
Engineering; Computer Science, Theory & Methods

SC Computer Science

GA BD4JF

UT WOS:000360837700010

OA gold

DA 2018-05-03

ER

PT J

AU Gluch, P

Johansson, K

Raisanen, C

AF Gluch, Pernilla

Johansson, Karin

Raisanen, Christine

TI Knowledge sharing and learning across community boundaries in an arena  
for energy efficient buildings

SO JOURNAL OF CLEANER PRODUCTION

LA English

DT Article

DE Energy efficiency; Inter-organisational learning; Knowledge sharing;  
Mediating objects; Renovation of residential housingID BOUNDED SOCIOTECHNICAL EXPERIMENTS; PROJECT ORGANIZATIONS; INNOVATION;  
COMMUNICATION; PERSPECTIVE; TRANSITION; MOBILITY

AB Within the field of sustainable development, collaborative and interdisciplinary actions are imperative for the development and implementation of proactive holistic renovation solutions. In an attempt to enhance cross-disciplinary and inter-organisational knowledge sharing, a project aimed at developing an arena for sharing knowledge pertaining to energy-efficient renovations of multi-family buildings was initiated. The authors have followed the development and implementation of this knowledge arena over a period of three years. The aim of this paper is to understand how knowledge sharing between different professional

groups and practices may be facilitated: in this case between various research organisations, municipal housing companies, energy suppliers and governmental organisations. Specific focus has been on identifying mechanisms for interaction and knowledge sharing between actors that normally do not meet in their everyday practice. The theoretical approach adopted concerns social processes related to the sharing of knowledge in and between organisations and professional groups and individuals. Findings show that in the arena knowledge was mainly shared within a pilot project where researchers and practitioners were jointly engaged in the planning and renovation of a building. Interaction within the arena was enabled by the individuals' mutual willingness to adapt and attempt to translate the disciplinary discourses and modes of communication of researchers and of practitioner specialists. Moreover, the motivation to share knowledge was related to their expectations of, and invested interest in, various arena activities. By empirically highlighting the facilitators and hindrances for knowledge-sharing in an arena for cleaner production, the paper contributes to increased understanding of inter-disciplinary communication and collaborative interaction. (C) 2012 Elsevier Ltd. All rights reserved.

C1 [Gluch, Pernilla; Johansson, Karin; Raisanen, Christine] Chalmers, Dep Civil & Environm Engn, Div Construct Management, SE-41296 Gothenburg, Sweden.

RP Johansson, K (reprint author), Chalmers, Dep Civil & Environm Engn, Div Construct Management, SE-41296 Gothenburg, Sweden.

EM pernilla.gluch@chalmers.se; karin.johansson@chalmers.se;  
christine.raisanen@chalmers.se

RI chen, zhu/K-5923-2013

OI Gluch, Pernilla/0000-0003-0026-0112

CR Bresnen M, 2005, BUILD RES INF, V33, P547, DOI 10.1080/09613210500288837

Bresnen M., 2003, International Journal of Project Management, V21, P157, DOI 10.1016/S0263-7863(02)00090-X

Brown HS, 2008, TECHNOL FORECAST SOC, V75, P107, DOI 10.1016/j.techfore.2006.05.014

Brown HS, 2003, TECHNOL ANAL STRATEG, V15, P291, DOI 10.1080/09537320310001601496

Brown JS, 2001, ORGAN SCI, V12, P198, DOI 10.1287/orsc.12.2.198.10116

Bryman A., 2011, SOCIAL RES METHODS

Cole RJ, 2011, BUILD RES INF, V39, P431, DOI 10.1080/09613218.2011.599057

Dainty A., 2006, COMMUNICATION CONSTR

Dalenback J.-O, 2011, P OK 2011 SEPT 28 30

Dubois A., 2002, CONSTRUCTION MANAGEM, V20, P621, DOI DOI 10.1080/01446190210163543

Fussel L., 2005, CORPORATE ENV GOVERN, P11

Gherardi S, 2000, ORGANIZATION, V7, P329, DOI 10.1177/135050840072008

Gherardi S, 2009, MANAGE LEARN, V40, P115, DOI 10.1177/1350507608101225

Glad W, 2012, BUILD RES INF, V40, P274, DOI 10.1080/09613218.2012.690955

Gluch P, 2012, ENG CONSTR ARCHIT MA, V19, P127, DOI 10.1108/09699981211206070

Gluch P, 2009, BUILD RES INF, V37, P164, DOI 10.1080/09613210802632849

Heiskanen E, 2010, TECHNOL ANAL STRATEG, V22, P495, DOI 10.1080/09537321003714568

Heiskanen E, 2010, J IND ECOL, V14, P91, DOI 10.1111/j.1530-9290.2009.00196.x

Kamp LM, 2004, ENERG POLICY, V32, P1625, DOI 10.1016/80301-4215(03)00134-4

Kimble C, 2010, INT J INFORM MANAGE, V30, P437, DOI 10.1016/j.ijinfomgt.2010.02.002

Lagan, 2012, LAG PROGR BUILD HAV

Lave Jean, 1991, SITUATED LEARNING LE

Loorbach D, 2010, GOVERNANCE, V23, P161, DOI 10.1111/j.1468-0491.2009.01471.x

Malmqvist T, 2011, ENERGY, V36, P1893, DOI 10.1016/j.energy.2010.08.040

Quist J, 2011, TECHNOL FORECAST SOC, V78, P883, DOI 10.1016/j.techfore.2011.01.011

Raisanen C, 2004, ORGANIZATION, V11, P101, DOI 10.1177/1350508404039660

Raisanen C., 1999, C FOR SYST GENR ACT

E2Rebuild, 2012, IND EN EFF RETR RES

Salkie Raphael, 1995, TEXT DISCOURSE ANAL

Stenberg A-C., 2006, INT STUDIES MANAGEME, V36, P32

Swedish Energy Agency, 2010, SVER BLEV NETT 2009

Swedish National Board of Housing Building and Planning, 2010, BYGG BO DIALOG KOMP

Teigland R, 2003, DECISION SCI, V34, P261, DOI 10.1111/1540-5915.02341

Thuvander L, 2011, P SB11 WORLD SUST BU

Tofield B., 2012, REFURBISHING EUROPE

Toller S, 2011, J IND ECOL, V15, P294

Vergragt PJ, 2007, J CLEAN PROD, V15, P1104, DOI 10.1016/j.jclepro.2006.05.020

Wenger E., 1998, COMMUNITIES PRACTICE

Whyte J, 2011, BUILD RES INF, V39, P473, DOI 10.1080/09613218.2011.592268

NR 39

TC 10

Z9 10

U1 0

U2 46

PU ELSEVIER SCI LTD

PI OXFORD

PA THE BOULEVARD, LANGFORD LANE, KIDLINGTON, OXFORD OX5 1GB, OXON, ENGLAND

SN 0959-6526

J9 J CLEAN PROD

J1 J. Clean Prod.

PD JUN

PY 2013

VL 48

BP 232

EP 240

DI 10.1016/j.jclepro.2012.10.020

PG 9

WC GREEN & SUSTAINABLE SCIENCE & TECHNOLOGY; Engineering, Environmental;  
Environmental Sciences

SC Science & Technology - Other Topics; Engineering; Environmental Sciences  
& Ecology

GA 169BD

UT WOS:000320751000025

DA 2018-05-03

ER

PT J

AU Kouveletsou, M

Sakkas, N

Garvin, S

Batic, M

Reccardo, D

Sterling, R

AF Kouveletsou, Maria

Sakkas, Nikos

Garvin, Stephen

Batic, Marko

Reccardo, Daniela

Sterling, Raymond

TI Simulating energy use and energy pricing in buildings: The case of  
electricity

SO ENERGY AND BUILDINGS

LA English

DT Article

DE Energy simulation; Energy use; Electricity pricing; Building energy  
performance

ID ARTIFICIAL NEURAL-NETWORKS; CONSUMPTION; SYSTEMS

AB The paper presents a methodology that has been developed and implemented for the simulation of electricity use (kWh) as well as electricity pricing (c(sic)/kWh) in buildings. In the simulation, electricity pricing has been treated as dependent on electricity use as energy pricing tariffs usually discriminate between specific electricity consumption zones, time periods, etc. Pricing and electricity use, together, may then provide an estimation of the building electric energy cost (sic). The simulation runs on an hourly resolution allowing to highlight some potential wasteful and costly practices in energy use and management and providing insight to user behavior, which has been a key driver for its development. The

key aspects of the simulation approach are presented and its use is demonstrated in two different buildings in Greece and Italy. The methodology is now adapted to allow for neural network based, real time training, which will also be briefly introduced. (C) 2012 Elsevier B.V. All rights reserved.

C1 [Kouveletsou, Maria; Sakkas, Nikos] Appl Ind Technol Ltd, Gerakas 15344, Greece.  
 [Garvin, Stephen] Bldg Res Estab Ltd, BRE Scotland, E Kilbride G750RD, Lanark, Scotland.  
 [Batic, Marko] Mihailo Pupin Inst, Belgrade 11060, Serbia.  
 [Reccardo, Daniela] DAppolonia SpA, I-16145 Genoa, Italy.  
 [Sterling, Raymond] NUI Galway, Informat Res Unit Sustainable Engrn, Galway, Ireland.

RP Kouveletsou, M (reprint author), Appl Ind Technol Ltd, 1 Souliou Str, Gerakas 15344, Greece.  
 EM kouveletsou@apintech.com; sakkas@apintech.com; GarvinS@bre.co.uk;  
 marko.batic@pupin.rs; daniela.reccardo@dappolonia.it;  
 raymond.sterling@nuigalway.ie

FU European Commission [246745]

FX The work presented in this paper is partly funded by the European Commission within the 7th Framework Programme (ENERGY WARDEN Project, Contract No.: 246745).

CR [Anonymous], 2012, EN EFF BUILD  
 Fumo N, 2010, ENER BUILDINGS, V42, P2331, DOI 10.1016/j.enbuild.2010.07.027  
 Gonzalez P.A., 2005, ENERGY BUILDINGS, V37  
 Hoes P, 2009, ENER BUILDINGS, V41, P295, DOI 10.1016/j.enbuild.2008.09.008  
 Kalogirou SA, 2001, RENEW SUST ENER REV, V5, P373, DOI 10.1016/S1364-0321(01)00006-5  
 Kalogirou SA, 2000, APPL ENER, V67, P17, DOI 10.1016/S0306-2619(00)00005-2  
 Karatasou S., 2006, ENERGY BUILDINGS, V38  
 Knight I., 2007, EUROPEAN CANADIAN NO  
 [Anonymous], 2000, LOAD SHIFT RESP TIM  
 Soderberg B., 1994, PREDICTING SYSTEM LO  
 PRECHELT Lutz, 1994, PROBEN1 SET NEURAL N  
 Riedlmiller M., 1993, IEEE INT C NEUR NETW, P586  
 Santin OG, 2011, ENER BUILDINGS, V43, P2662, DOI 10.1016/j.enbuild.2011.06.024  
 Seryak J., 2003, AM SOL EN SOC SOL C  
 Swan LG, 2009, RENEW SUST ENER REV, V13, P1819, DOI 10.1016/j.rser.2008.09.033  
 Yao RM, 2005, ENER BUILDINGS, V37, P663, DOI 10.1016/j.enbuild.2004.09.007  
 Zhai ZQ, 2006, INDOOR BUILT ENVIRON, V15, P305, DOI 10.1177/1420326X06067336  
 Zhai ZQJ, 2005, ENER BUILDINGS, V37, P333, DOI 10.1016/j.enbuild.2004.07.001

NR 18  
 TC 10  
 Z9 10  
 U1 0  
 U2 12  
 PU ELSEVIER SCIENCE SA  
 PI LAUSANNE  
 PA PO BOX 564, 1001 LAUSANNE, SWITZERLAND  
 SN 0378-7788  
 J9 ENER BUILDINGS  
 JI Energy Build.  
 PD NOV  
 PY 2012  
 VL 54  
 BP 96  
 EP 104  
 DI 10.1016/j.enbuild.2012.07.031  
 PG 9  
 WC Construction & Building Technology; Energy & Fuels; Engineering, Civil  
 SC Construction & Building Technology; Energy & Fuels; Engineering  
 GA 059ZU  
 UT WOS:000312745200012  
 DA 2018-05-03  
 ER

PT J

AU Kok, N

McGraw, M

Quigley, JM

AF Kok, Nils

McGraw, Marquise

Quigley, John M.

TI The diffusion over time and space of energy efficiency in building

SO ANNALS OF REGIONAL SCIENCE

LA English

DT Article

ID ENVIRONMENTAL-REGULATION; TECHNOLOGY DIFFUSION; PANEL-DATA; INNOVATION;  
ECONOMICS

AB Awareness of global warming and the extent of greenhouse gas emissions have focused more attention upon energy efficiency in building. Moreover, the inventory of "green" office space in the United States has increased dramatically since the introduction of rating schemes that attest to the energy efficiency or sustainability of commercial buildings. In some metropolitan areas, the supply of certified office buildings has more than doubled in the last decade, and there are a few metropolitan areas where "green" office space now accounts for more than a quarter of the total office stock. In this paper, we analyze the diffusion of buildings certified for energy efficiency across US property markets. Using a panel of 48 metropolitan areas observed over the last fifteen years, we trace the diffusion of green building practices across the country. We then model the geographic patterns and dynamics of building certification, relating industry composition, changes in economic conditions, characteristics of the local commercial property market, and the presence of human capital, to the cross-sectional variation in energy-efficient building technologies and the diffusion of those technologies over time. Understanding the determinants and the rate at which energy-efficient building practices diffuse over space and time is important for designing policies to affect resource consumption in the built environment.

C1 [McGraw, Marquise; Quigley, John M.] Univ Calif Berkeley, Dept Econ, Berkeley, CA 94720 USA.

[Kok, Nils] Maastricht Univ, Sch Business & Econ, Dept Finance, NL-6200 MD Maastricht, Netherlands.

RP Quigley, JM (reprint author), Univ Calif Berkeley, Dept Econ, 549 Evans Hall, Berkeley, CA 94720 USA.

EM n.kok@maastrichtuniversity.nl; mmcgraw@econ.berkeley.edu;

quigley@econ.berkeley.edu

CR Alcott H, 2010, SCIENCE, V327, P1204

ARELLANO M, 1991, REV ECON STUD, V58, P277, DOI 10.2307/2297968

Bauer TN, 1996, J BUS PSYCHOL, V10, P445, DOI 10.1007/BF02251780

Brounen D, 2011, EUR EC REV IN PRESS

Costa D. L., 2010, 15939 NBER

Costa DL, 2010, 1598 NBER

DeCanio SJ, 1998, REV ECON STAT, V80, P95, DOI 10.1162/003465398557366

Eichholtz P. M., 2010, WHO RENTS GREEN ECOL

Eichholtz P, 2010, AM ECON REV, V100, P2494

Eichholtz PMA, 2013, REV EC STAT IN PRESS

Elliott E, 1997, J ENVIRON MANAGE, V51, P15, DOI 10.1006/jema.1996.0129

Fuerst F., 2009, NEW EVIDENCE GREEN B

Fuerst F, 2011, REAL ESTATE ECON, V39, P45, DOI 10.1111/j.1540-6229.2010.00286.x

GRILICHES Z, 1957, ECONOMETRICA, V25, P501, DOI 10.2307/1905380

Hall B. H., 2004, HDB INNOVATION, P459

HAUSMAN JA, 1979, BELL J ECON, V10, P33, DOI 10.2307/3003318

JAFFE AB, 1994, RESOUR ENERGY ECON, V16, P91, DOI 10.1016/0928-7655(94)90001-9

Jaffe AB, 1997, REV ECON STAT, V79, P610, DOI 10.1162/003465397557196

Kahn ME, 2007, J ENVIRON ECON MANAG, V54, P129, DOI 10.1016/j.jeem.2007.05.001

Kahn M. E., 2010, 16241 NBER

Keller W, 2004, J ECON LIT, V42, P752, DOI 10.1257/0022051042177685

Menanteau P, 2000, RES POLICY, V29, P375, DOI 10.1016/S0048-7333(99)00038-4

Metcalf GE, 1999, REV ECON STAT, V81, P516, DOI 10.1162/003465399558274

Newsham GR, 2009, ENERG BUILDINGS, V41, P897, DOI 10.1016/j.enbuild.2009.03.014

OSTER SM, 1977, BELL J ECON, V8, P361, DOI 10.2307/3003292

Reiss PC, 2008, RAND J ECON, V39, P636, DOI 10.1111/j.1756-2171.2008.00032.x  
 Roe B, 2001, ENER POLICY, V29, P917, DOI 10.1016/S0301-4215(01)00006-4  
 ROSE NL, 1990, RAND J ECON, V21, P354, DOI 10.2307/2555614  
 Rosenberg N., 1976, PERSPECTIVES TECHNOL  
 Royal Institute of Chartered Surveyors, 2005, GREEN VAL  
 Scofield JH, 2009, ENER BUILDINGS, V41, P1386, DOI 10.1016/j.enbuild.2009.08.006  
 Snyder LD, 2003, AM ECON REV, V93, P431, DOI 10.1257/000282803321947470  
 Stern N, 2008, AM ECON REV, V98, P1, DOI 10.1257/aer.98.2.1  
 Zingales L, 2000, J FINANC, V55, P1623, DOI 10.1111/0022-1082.00262

NR 34

TC 10

Z9 10

U1 1

U2 38

PU SPRINGER

PI NEW YORK

PA 233 SPRING ST, NEW YORK, NY 10013 USA

SN 0570-1864

J9 ANN REGIONAL SCI

J1 Ann. Reg. Sci.

PD APR

PY 2012

VL 48

IS 2

SI SI

BP 541

EP 564

DI 10.1007/s00168-011-0494-9

PG 24

WC Economics; Environmental Studies; Geography

SC Business & Economics; Environmental Sciences & Ecology; Geography

GA 900NI

UT WOS:000300893600011

DA 2018-05-03

ER

PT J

AU Gutierrez, E

Adenso-Diaz, B

Lozano, S

Gonzalez-Torre, P

AF Gutierrez, Ester

Adenso-Diaz, Belarmino

Lozano, Sebastian

Gonzalez-Torre, Pilar

TI Lifetime of household appliances: empirical evidence of users behaviour

SO WASTE MANAGEMENT & RESEARCH

LA English

DT Article

DE Household behaviour; electrical and electronic equipment; lifetime;

survival analysis; competing risks

ID COMPETING RISKS; CUMULATIVE INCIDENCE; MODEL; REPLACEMENT; INFERENCE;

CRT

AB The household appliance industry is one of the most important sectors from both the economic and environmental point of view. A greater understanding of the way in which consumers of these items behave would help to better plan the recycling needs as a function of previous purchase figures. This paper presents the findings of a field survey of Spanish consumer habits with respect to different common household appliances as regards replacement time and the reasons for replacing these appliances. The

methodology used is based on survival analysis; specifically, a competing risks model. A Cox proportional hazards model is also used for the sake of comparison. Our results show that as the number of people and/or persons under 18 years in the household increases, the lifetimes of some types of appliance decrease significantly. Competing risk model shows that the probability of replacing the refrigerator due to malfunction and technological obsolescence increases with the increase of family members with a higher education. We also provide the cumulative incidence function for different appliances, which can be used to forecast future demands and electrical and electronic waste generation.

C1 [Gutierrez, Ester; Lozano, Sebastian] Univ Seville, Escuela Tecn Super Ingenieros, Seville 41092, Spain.

[Adenso-Diaz, Belarmino; Gonzalez-Torre, Pilar] Univ Oviedo, Escuela Politecn Super Ingn, Gijon, Spain.

RP Gutierrez, E (reprint author), Univ Seville, Escuela Tecn Super Ingenieros, Seville 41092, Spain.

EM egm@esi.us.es

RI Adenso-Diaz, Belarmino/L-1638-2017; Lozano, Sebastian/E-7807-2010

OI Adenso-Diaz, Belarmino/0000-0002-6519-9810; Lozano,

Sebastian/0000-0002-0401-3584; Gutierrez, Ester/0000-0001-9642-3195

FU Spanish Ministry of Science and Innovation [MEC-DPI2007-65827-C02-01]

FX The authors wish to thank the three referees for the insightful comments

on an earlier version of the paper. This research has been funded by the

Spanish Ministry of Science and Innovation through grant:

MEC-DPI2007-65827-C02-01.

CR BAYUS BL, 1994, IEEE ENG MANAGEMENT, V22, P65

Berger IE, 1997, ENVIRON BEHAV, V29, P515, DOI 10.1177/001391659702900404

\*CET, 2007, OBS CET 2006

COX DR, 1972, J R STAT SOC B, V34, P187

Eugster M, 2007, KEY ENV IMPACTS CHIN

European Parliament the Council and the Commission, 2003, OFFICIAL J EUROPEA L, V037, P0024

Fernandez VP, 2001, ENERG ECON, V23, P305, DOI 10.1016/S0140-9883(00)00066-9

Fine JP, 1999, J AM STAT ASSOC, V94, P496, DOI 10.2307/2670170

Fine J.P., 2001, BIostatistics, V2, P85, DOI DOI 10.1093/BIostatistics/2.1.85

GRAY RJ, 1988, ANN STAT, V16, P1141, DOI 10.1214/aos/1176350951

INE, 2007, ENC COND VID

INE, 2005, ENC POBL ACT

\*INE, 2009, PADR HAB

\*INE, 2007, ENC COMP HAB COMPR

\*INM, 2005, GUIA RES CLIM ESP 19

JEONG J, 2006, BIostatistics, V8, P184

Kalbfleisch JD, 1980, STAT ANAL FAILURE TI

KAPLAN EL, 1958, J AM STAT ASSOC, V53, P457, DOI 10.2307/2281868

Kreng VB, 2009, TECHNOL FORECAST SOC, V76, P942, DOI 10.1016/j.techfore.2009.02.001

Kulathinal SB, 2002, LIFETIME DATA ANAL, V8, P147, DOI 10.1023/A:1014887507027

Lee J, 2006, TECHNOL FORECAST SOC, V73, P362, DOI 10.1016/j.techfore.2004.12.002

LIN, 2008, RESOURCES CONSERVATI, V52, P1322

Lin DY, 1997, STAT MED, V16, P901, DOI 10.1002/(SICI)1097-0258(19970430)16:8<901::AID-

SIM543>3.0.CO;2-M

\*MITC, 2007, COM EL ESP

PEPE MS, 1991, J AM STAT ASSOC, V86, P770, DOI 10.2307/2290411

PEPE MS, 1993, STAT MED, V12, P737, DOI 10.1002/sim.4780120803

Pintilie M, 2007, STAT MED, V26, P1360, DOI 10.1002/sim.2655

Vicente P, 2007, RESOUR CONSERV RECY, V52, P1, DOI 10.1016/j.resconrec.2007.01.005

Walk W, 2009, WASTE MANAGE, V29, P945, DOI 10.1016/j.wasman.2008.07.012

Young D, 2008, ENERG POLICY, V36, P34, DOI 10.1016/j.enpol.2007.09.011

NR 30

TC 10

Z9 10

U1 4

U2 19

PU SAGE PUBLICATIONS LTD

PI LONDON

PA 1 OLIVERS YARD, 55 CITY ROAD, LONDON EC1Y 1SP, ENGLAND



SN 0734-242X  
 J9 WASTE MANAGE RES  
 JI Waste Manage. Res.  
 PD JUN  
 PY 2011  
 VL 29  
 IS 6  
 BP 622  
 EP 633  
 DI 10.1177/0734242X10377914  
 PG 12  
 WC Engineering, Environmental; Environmental Sciences  
 SC Engineering; Environmental Sciences & Ecology  
 GA 769JV  
 UT WOS:000291009600008  
 PM 20630942  
 DA 2018-05-03  
 ER

PT J  
 AU Sahakian, MD  
     Steinberger, JK  
 AF Sahakian, Marlyne D.  
     Steinberger, Julia K.

TI Energy Reduction Through a Deeper Understanding of Household Consumption  
 Staying Cool in Metro Manila

SO JOURNAL OF INDUSTRIAL ECOLOGY

LA English

DT Article

DE emerging economy; energy conservation; household electricity; industrial  
 ecology; the Philippines; sustainable consumption

ID SUSTAINABLE CONSUMPTION; PHILIPPINES; ENVIRONMENT; CITIES

AB This article proposes a multidisciplinary and systemic approach to sustainable consumption that combines environmental considerations of energy usage from a life cycle perspective with a social understanding of consumption grounded in economic anthropology. The goal is to understand both consumption patterns and drivers, with a focus on household energy used for cooling in the metropolitan region of Manila in the Philippines. For different socioeconomic groups, cooling devices also deliver social and cultural services, such as socializing or adhering to Western fashion trends. This article argues for the need to address these aspects if reductions in household energy usage are to become possible. The limits of individual-choice theories are rendered apparent, with examples of how institutional and structural conditions lock in consumption patterns and restrict household choices. The notion that emerging economies might be able to "leapfrog" over the environmental errors of more industrialized countries is also raised and critiqued.

C1 [Sahakian, Marlyne D.] Grad Inst Int & Dev Studies, CH-1202 Geneva, Switzerland.

[Steinberger, Julia K.] Univ Leeds, Sustainabil Res Inst, Leeds LS2 9JT, W Yorkshire, England.

[Steinberger, Julia K.] IFF Univ Klagenfurt, Inst Social Ecol, Vienna, Austria.

RP Sahakian, MD (reprint author), Grad Inst Int & Dev Studies, 20 Rue Rothschild, CH-1202 Geneva, Switzerland.

EM marlyne.sahakian@graduateinstitute.ch

RI Steinberger, Julia/B-3288-2011

OI Steinberger, Julia/0000-0002-5925-9602

CR Bank L, 1997, AFRICAN STUDIES, V56, P157

Baudrillard Jean, 1970, SOC CONSOMMATION SES

BENSEL TG, 1995, ENERGY, V20, P173, DOI 10.1016/0360-5442(94)00071-A

Boden TA., 2009, GLOBAL REGIONAL NATL

Bourdieu Pierre, 1979, DISTINCTION CRITIQUE

Bourdieu P, 1972, ESQUISSE THEORIE PRA

The Conference Board, 2009, TOT EC DAT

Chakravarty S, 2009, P NATL ACAD SCI USA, V106, P11884, DOI 10.1073/pnas.0905232106  
 Chappells H, 2005, BUILD RES INF, V33, P32, DOI 10.1080/0961321042000322762  
 CHIU ASF, 2004, J CLEAN PROD, V12, P1034  
 Cohen M, 2001, EXPLORING SUSTAINABL  
 Cooper G., 1998, AIR CONDITIONING AM  
 Douglas Mary, 1979, WORLD GOODS ANTHR CO  
 ESTOQUE MA, 2000, CLIMATE CHANGES DUE  
 GARCIA RA, 1994, ENERGY, V19, P539, DOI 10.1016/0360-5442(94)90050-7  
 GLADWELL M, 1997, NEW YORKER 0317, P78  
 Green K, 2006, INDUSTRIAL ECOLOGY AND SPACES OF INNOVATION, P1  
 HEYMAN JM, 1994, HUM ORGAN, V53, P132, DOI 10.17730/humo.53.2.48u23qk420756g08  
 International Energy Agency, 2007, EN BAL NONOECD COUNT  
 Jacobson A, 2005, ENER POLICY, V33, P1825, DOI 10.1016/j.enpol.2004.02.017  
 Lee R, 2006, J WOMENS HIST, V18, P55, DOI 10.1353/jowh.2006.0051  
 Mehlwana A.M, 1997, ENERGY SUSTAIN DEV, V3, P5, DOI DOI 10.1016/S0973-0826(08)60208-2  
 Myers Norman, 2004, NEW CONSUMERS INFLUE  
 \*NSO, 2004, HOUS EN CONS SURV FI  
 \*NSO, 2008, SURV OV FIL  
 Parkhurst G, 2008, BUILD RES INF, V36, P351, DOI 10.1080/09613210802076500  
 Peters GP, 2008, ENVIRON SCI TECHNOL, V42, P1401, DOI 10.1021/es072023k  
 Polanyi K., 1957, TRADE MARKET EARLY E  
 Polanyi K., 2001, GREAT TRANSFORMATION  
 Quisumbing A, 2010, J DEV STUD, V46, P91, DOI 10.1080/00220380903197960  
 \*REP PHIL, 2007, POW SECT SIT  
 \*REP PHIL, 2010, EN RES COAL STAT  
 Ropke I, 2009, ECOL ECON, V68, P2490, DOI 10.1016/j.ecolecon.2009.05.015  
 Rostow WW, 1960, STAGES EC GROWTH NON  
 Sanne C, 2002, ECOL ECON, V42, P273, DOI 10.1016/S0921-8009(02)00086-1  
 SATHAYE J, 1991, ANNU REV ENER ENV, V16, P295  
 Shove E, 2003, COMFORT CLEANLINESS  
 Shove E, 2009, TIME CONSUMPTION EVE  
 \*SSC CDM PDD, 2009, MAK S SEW TREATM PLA  
 Tukker A., 2005, INT J INNOVATION SUS, V1, P65  
 Tukker A, 2010, J IND ECOL, V14, P1, DOI 10.1111/j.1530-9290.2009.00214.x  
 Tyler SR, 1996, ATMOS ENVIRON, V30, P809, DOI 10.1016/1352-2310(94)00353-X  
 United Nations, 2007, WORLD POP PROSP 2006  
 \*UNDP, 2007, HUM DEV REP 2007 200  
 Veblen T, 1994, THEORY LEISURE CLASS  
 Wilhite H, 1996, ENER POLICY, V24, P795, DOI 10.1016/0301-4215(96)00061-4  
 Wilhite Harold, 2008, CONSUMPTION TRANSFOR  
 Wilk R, 2002, GLOBAL ENVIRON CHANG, V12, P5, DOI 10.1016/S0959-3780(01)00028-0

NR 48

TC 10

Z9 11

U1 3

U2 11

PU WILEY-BLACKWELL

PI MALDEN

PA COMMERCE PLACE, 350 MAIN ST, MALDEN 02148, MA USA

SN 1088-1980

J9 J IND ECOL

JI J. Ind. Ecol.

PD FEB

PY 2011

VL 15

IS 1

BP 31

EP 48

DI 10.1111/j.1530-9290.2010.00305.x

PG 18

WC GREEN & SUSTAINABLE SCIENCE & TECHNOLOGY; Engineering, Environmental;  
Environmental Sciences

SC Science & Technology - Other Topics; Engineering; Environmental Sciences  
& Ecology

GA 723CN

UT WOS:000287483900005

DA 2018-05-03

ER

PT J

AU Gabreyohannes, E

AF Gabreyohannes, Emmanuel

TI A nonlinear approach to modelling the residential electricity  
consumption in Ethiopia

SO ENERGY ECONOMICS

LA English

DT Article

DE Nonlinearity; SETAR model; STR model; Generalized impulse response  
function; Asymmetry

ID NUISANCE PARAMETER; HYPOTHESIS; TRANSITION

AB In this paper an attempt is made to model, analyze and forecast the residential electricity consumption in Ethiopia using the self-exciting threshold autoregressive (SETAR) model and the smooth transition regression (STR) model. For comparison purposes, the application was also extended to standard linear models. During the empirical presentation of both models, significant nonlinear effects were found and linearity was rejected. The SETAR model was found out to be relatively better than the linear autoregressive model in out-of-sample point and interval (density) forecasts. Results from our STR model showed that the residual variance of the fitted STR model was only about 65.7% of that of the linear ARX model. Thus, we can conclude that the inclusion of the nonlinear part, which basically accounts for the arrival of extreme price events, leads to improvements in the explanatory abilities of the model for electricity consumption in Ethiopia. (C) 2009 Elsevier B.V. All rights reserved.

C1 Ethiopian Civil Serv Coll, Addis Ababa, Ethiopia.

RP Gabreyohannes, E (reprint author), Ethiopian Civil Serv Coll, POB 5648, Addis Ababa, Ethiopia.

EM emmanuel.yohannes@tuwien.ac.at

CR ANDREWS DWK, 1994, *ECONOMETRICA*, V62, P1383, DOI 10.2307/2951753

BACON DW, 1971, *BIOMETRIKA*, V58, P525, DOI 10.2307/2334387

Clements MP, 1999, *J APPL ECONOM*, V14, P123

DAVIES RB, 1987, *BIOMETRIKA*, V74, P33, DOI 10.2307/2336019

Hansen BE, 1996, *ECONOMETRICA*, V64, P413, DOI 10.2307/2171789

Koop G, 1996, *J ECONOMETRICS*, V74, P119, DOI 10.1016/0304-4076(95)01753-4

Leybourne S., 1998, *J TIME SER ANAL*, V19, P83, DOI [10.1111/1467-9892.00078, DOI 10.1111/1467-9892.00078]

LUUKKONEN R, 1988, *BIOMETRIKA*, V75, P491, DOI 10.1093/biomet/75.3.491

MISIOREK A, 2006, *STUDIES NONLINEAR DY*, V10

Moral-Carcedo J, 2005, *ENERG ECON*, V27, P477, DOI 10.1016/j.eneco.2005.01.003

Pesaran MH, 1997, *J ECON DYN CONTROL*, V21, P661, DOI 10.1016/S0165-1889(96)00002-4

Tong H., 1990, *NONLINEAR TIME SERIE*

Van Dijk D., 2002, *ECONOMET REV*, V21, P1, DOI DOI 10.1081/ETC-120008723

Van Dijk D, 2000, 200001A ER U EC I

NR 14

TC 10

Z9 10

U1 0

U2 11

PU ELSEVIER SCIENCE BV

PI AMSTERDAM

PA PO BOX 211, 1000 AE AMSTERDAM, NETHERLANDS

SN 0140-9883  
 J9 ENERG ECON  
 JI Energy Econ.  
 PD MAY  
 PY 2010  
 VL 32  
 IS 3  
 BP 515  
 EP 523  
 DI 10.1016/j.eneco.2009.08.008  
 PG 9  
 WC Economics  
 SC Business & Economics  
 GA 578WC  
 UT WOS:000276326200002  
 DA 2018-05-03  
 ER

PT J

AU Jia, MD

Srinivasan, RS

Raheem, AA

AF Jia, Mengda

Srinivasan, Ravi S.

Raheem, Adeeba A.

TI From occupancy to occupant behavior: An analytical survey of data acquisition technologies, modeling methodologies and simulation coupling mechanisms for building energy efficiency

SO RENEWABLE & SUSTAINABLE ENERGY REVIEWS

LA English

DT Review

DE Occupant behavior; Model application; Modeling; Building energy efficiency

ID WINDOW OPENING BEHAVIOR; RESIDENTIAL BUILDINGS; COMFORT MANAGEMENT; COMMERCIAL BUILDINGS; PREDICTIVE CONTROL; STOCHASTIC-MODELS; PATTERN DETECTION; OFFICE OCCUPANTS; CONSUMPTION; VALIDATION

AB Energy consumption and indoor environment of buildings are proved to be largely influenced by the presence and behaviors of occupants. The uncertainty caused by occupant behaviors accounts for a significant discrepancy between the predicted and actual energy usage. In a real world, building system operations and control will be directly affected by occupant behavior, which may lead to over thirty percent waste against building's designed performance. Therefore, the capability to seamlessly integrate occupant behavior in energy simulation tools and building management systems in the future is clearly important to optimize building energy use while maintaining the same level of services. However, research has not reached the phase that occupant behaviors could be effectively modeled. Thus, the traditional schedule based approach is not adequate to satisfy the needs of building efficiency. In this paper, a thorough survey of occupant behavior modeling and simulation state-of-the-art technologies and methodologies for building energy efficiency is conducted. The paper first identifies and discusses the significance and application scale of building occupant behavior model. Based on the information collected, some recent data acquisition technologies for behavior-related research and occupant behavior modeling approaches are summarized. The advantages and limitations of these modeling methods are compared and analyzed, as well as appropriate recommendations are made for the future research. The paper finally outlines the findings and potential development areas in the field of occupant behavior modeling for energy efficient buildings.

C1 [Jia, Mengda; Srinivasan, Ravi S.] Univ Florida, ME Rinker Sr Sch Construct Management, Gainesville, FL 32611 USA.

[Raheem, Adeeba A.] Univ Texas El Paso, Dept Civil Engn, El Paso, TX 79912 USA.

RP Jia, MD (reprint author), Univ Florida, ME Rinker Sr Sch Construct Management, Gainesville, FL 32611 USA.

- EM jmd930@ufl.edu; sravi@ufl.edu; aaraheem@utep.edu  
OI Raheem, Adeeba/0000-0002-2226-5582  
CR Agarwal Y., 2010, P 2 ACM WORKSH EMB S, P1, DOI DOI 10.1145/1878431.1878433  
Alfakara A, 2014, P S SIM ARCH URB DES, P13  
Alhamoud A, 2015, ANONYMOUS WIRELESS S, P52  
Andersen R, 2013, BUILD ENVIRON, V69, P101, DOI 10.1016/j.buildenv.2013.07.005  
Andrews CJ, 2013, SIMULATION MODELING  
ASHRAE AS, 2004, 901E ASHRAE AS  
Azar E, 2011, J COMPUT CIV ENG  
Baptista M., 2014, P 28 AAAI C ART INT, P1164  
Cali D, 2015, BUILD ENVIRON, V86, P39, DOI 10.1016/j.buildenv.2014.12.011  
Carmenate T, 2015, IEEE INT CON AUTO SC, P425, DOI 10.1109/CoASE.2015.7294116  
Chen JY, 2014, ENERGBUILDINGS, V82, P540, DOI 10.1016/j.enbuild.2014.07.053  
Chen JY, 2012, ENERGBUILDINGS, V47, P515, DOI 10.1016/j.enbuild.2011.12.026  
Chen ZH, 2015, ENERGBUILDINGS, V103, P216, DOI 10.1016/j.enbuild.2015.06.009  
Cheung CK, 2005, ENERGBUILDINGS, V37, P37, DOI 10.1016/j.enbuild.2004.05.002  
Clevenger C.M., 2006, JOINT INT C COMP DEC, P1  
D'Oca S, 2015, ENERGBUILDINGS, V88, P395, DOI 10.1016/j.enbuild.2014.11.065  
D'Oca S, 2014, BUILD SIMUL-CHINA, V7, P683, DOI 10.1007/s12273-014-0191-6  
Daniel L, 2015, ENERGBUILDINGS, V88, P34, DOI 10.1016/j.enbuild.2014.11.060  
de Wilde P, 2014, AUTOMAT CONSTR, V41, P40, DOI 10.1016/j.autcon.2014.02.009  
Dong B., 2009, P BUILDING SIMULATIO, P1444  
Dong B, 2014, BUILD SIMUL-CHINA, V7, P89, DOI 10.1007/s12273-013-0142-7  
Dong B, 2011, J BUILD PERFORM SIMU, V4, P359, DOI 10.1080/19401493.2011.577810  
Duan Y, 2014, P 3 INT HIGH PERF BU  
Elmualim AA, 2012, 10 INT HEALTH BUILD  
Erickson V. L., 2009, P 1 ACM WORKSH EMB S, P19, DOI DOI 10.1145/1810279.1810284  
Erickson V. L., 2011, 10 INT C INF PROC SE, P258  
Fabi V, 2011, P BUILDING SIMULATIO  
Fabi V, 2014, 8 WINDS C  
Feng XH, 2015, ENERGBUILDINGS, V87, P348, DOI 10.1016/j.enbuild.2014.11.067  
Gunay HB, 2013, BUILD ENVIRON, V70, P31, DOI 10.1016/j.buildenv.2013.07.020  
Haldi F, 2008, BUILD ENVIRON, V43, P2163, DOI 10.1016/j.buildenv.2008.01.003  
Haldi F, 2011, J BUILD PERFORM SIMU, V4, P323, DOI 10.1080/19401493.2011.558213  
Haldi F, 2009, BUILD ENVIRON, V44, P2378, DOI 10.1016/j.buildenv.2009.03.025  
Hawarah L, 2010, 10 INT C ART INT SOF, P372  
Hoes P, 2009, ENERGBUILDINGS, V41, P295, DOI 10.1016/j.enbuild.2008.09.008  
Hong T., SIM 2012  
Hong TZ, 2015, BUILD ENVIRON, V92, P764, DOI 10.1016/j.buildenv.2015.02.019  
Kavulya G, 2012, COMPUT CIV ENG, V2012, P569  
Klein L, 2012, AUTOMAT CONSTR, V22, P525, DOI 10.1016/j.autcon.2011.11.012  
Korjenic A, 2012, AUTOMAT CONSTR, V23, P64, DOI 10.1016/j.autcon.2012.01.001  
Lam K.P., 2009, IBPSA BUILDING SIMUL, V145, P1452  
Langevin J, 2015, BUILD ENVIRON, V88, P27, DOI 10.1016/j.buildenv.2014.11.037  
Lee C, 2014, HK JOINT S 2014 HONG  
Lee YS, 2014, ENERGBUILDINGS, V69, P407, DOI 10.1016/j.enbuild.2013.11.020  
Li N, 2015, RENEW ENERGB, V73, P84, DOI 10.1016/j.renene.2014.05.065  
Li S, 2014, IEEE I C CONS ELECT, P1, DOI 10.1109/ICCE-Berlin.2014.7034294  
Liao CD, 2010, P AMER CONTR CONF, P3130  
Liao CD, 2012, J BUILD PERFORM SIMU, V5, P5, DOI 10.1080/19401493.2010.531143  
Mahdavi A., 2011, BUILDING SIMULATION  
Mandavi A., 2009, USER BEHAV ENERGY PE  
MANDAVI A, 2015, ENERGY BUILD, V86, P349, DOI DOI 10.1016/J.ENBUILD.2014.10.027  
Masoso OT, 2010, ENERGBUILDINGS, V42, P173, DOI 10.1016/j.enbuild.2009.08.009  
Masoudifar N, 2014, WINT SIMUL C PROC, P1108, DOI 10.1109/WSC.2014.7019969  
Nagy Z, 2015, ENERGBUILDINGS, V94, P100, DOI 10.1016/j.enbuild.2015.02.053  
Nasir N, 2015, ANONYMOUS DISTRIBUTE, P73  
Oldewurtel F, 2012, ENERGBUILDINGS, V45, P15, DOI 10.1016/j.enbuild.2011.09.022

Page J, 2008, ENERGBUILDINGS, V40, P83, DOI 10.1016/j.enbuild.2007.01.018  
Peng C, 2012, BUILD SIMUL-CHINA, V5, P85, DOI 10.1007/s12273-011-0049-0  
Pisello AL, 2015, BUILD ENVIRON, V88, P116, DOI 10.1016/j.buildenv.2014.09.025  
Ren XX, 2015, BUILD ENVIRON, V89, P1, DOI 10.1016/j.buildenv.2015.02.009  
Roetzel A, 2015, BUILD SIMUL-CHINA, V8, P211, DOI 10.1007/s12273-014-0203-6  
Ryan EM, 2012, ENERGBUILDINGS, V47, P375, DOI 10.1016/j.enbuild.2011.12.020  
Santini OG, 2009, ENERGBUILDINGS, V41, P1223, DOI 10.1016/j.enbuild.2009.07.002  
Schakib-Ekbatan K, 2015, BUILD ENVIRON, V84, P142, DOI 10.1016/j.buildenv.2014.10.018  
Shaikh PH, 2014, RENEW SUST ENER REV, V34, P409, DOI 10.1016/j.rser.2014.03.027  
[Anonymous], GUID LIF CYCL COST A  
Tabak V, 2010, BUILD ENVIRON, V45, P1366, DOI 10.1016/j.buildenv.2009.11.018  
Tanner RA, 2014, J BUILD PERFORM SIMU, V7, P427, DOI 10.1080/19401493.2013.863384  
Nguyen TA, 2013, ENERGBUILDINGS, V56, P244, DOI 10.1016/j.enbuild.2012.09.005  
USEIA, MONTHL EN REV EN CON  
Virote J, 2012, ENERGBUILDINGS, V53, P183, DOI 10.1016/j.enbuild.2012.06.001  
Wang LP, 2015, ENERGBUILDINGS, V92, P313, DOI 10.1016/j.enbuild.2015.01.060  
Wei S, 2014, ENERGBUILDINGS, V70, P36, DOI 10.1016/j.enbuild.2013.11.001  
Yan D, 2015, ENERGBUILDINGS, V107, P264, DOI 10.1016/j.enbuild.2015.08.032  
Yang Z, 2014, SIMUL-T SOC MOD SIM, V90, P960, DOI 10.1177/0037549713489918  
Yang Z, 2014, BUILD ENVIRON, V78, P23, DOI 10.1016/j.buildenv.2014.04.003  
Yu T., 2010, IEEE 9 INT C MACH LE, P726  
Yu Z, 2011, ENERGBUILDINGS, V43, P1409, DOI 10.1016/j.enbuild.2011.02.002  
Yu Z, 2011, ENERGY, V36, P6596, DOI 10.1016/j.energy.2011.09.002  
Zaraket T, 2014, ASME 2014 INT DES EN  
Zaraket T, 2015, J MECH DESIGN, V137, DOI 10.1115/1.4030202  
Zhao J, 2014, ENERGBUILDINGS, V82, P341, DOI 10.1016/j.enbuild.2014.07.033  
Zhou SY, 2014, ELECTR POW COMPO SYS, V42, P315, DOI 10.1080/15325008.2013.862322  
Zimmermann G., 2007, P 2007 SUMM COMP SIM, P913  
[Anonymous], 2013, BUILDING ENERGY EFFI

NR 85

TC 9

Z9 9

U1 3

U2 21

PU PERGAMON-ELSEVIER SCIENCE LTD

PI OXFORD

PA THE BOULEVARD, LANGFORD LANE, KIDLINGTON, OXFORD OX5 1GB, ENGLAND

SN 1364-0321

J9 RENEW SUST ENER REV

J1 Renew. Sust. Energ. Rev.

PD FEB

PY 2017

VL 68

BP 525

EP 540

DI 10.1016/j.rser.2016.10.011

PN 1

PG 16

WC GREEN & SUSTAINABLE SCIENCE & TECHNOLOGY; Energy & Fuels

SC Science & Technology - Other Topics; Energy & Fuels

GA EH6QO

UT WOS:000391899200039

DA 2018-05-03

ER

PT J

AU Binks, AN

Kenway, SJ

Lant, PA  
Head, BW

AF Binks, Amanda N.  
Kenway, Steven J.

Lant, Paul A.  
Head, Brian W.

TI Understanding Australian household water-related energy use and  
identifying physical and human characteristics of major end uses

SO JOURNAL OF CLEANER PRODUCTION

LA English

DT Article

DE Water; Energy; Material flow analysis; Greenhouse gas emissions;  
Residential; Demand management

ID GREENHOUSE-GAS EMISSIONS; APARTMENT BUILDINGS; HOT-WATER; CONSUMPTION;  
CONSERVATION; EFFICIENCY; HEATERS; LIFE; DETERMINANTS; PERFORMANCE

AB Residential resource use efficiency and management is a subject of interest to a number of fields spanning the physical and social sciences. Energy use for residential water heating in Australia is some five to eleven times more than the energy required to deliver urban water services. However, little is known about which activities within households contribute most significantly to water-related energy use (WRE). This work quantifies WRE use in individual households, and identifies household characteristics which contribute significantly to variation. Empirical data were collected through in-home audits, interviews and high-resolution end-use water flow meters for five households in Melbourne, and two in Brisbane, Australia. This was used to characterise 139 parameters describing household occupancy characteristics, behaviours, technologies, and structural and environmental aspects of influence. Mathematical material flow analysis (MMFA) modelling was conducted for individual water and energy use subsystems within each household. WRE use ranged from 7 to 21 kWh hh<sup>-1</sup> d<sup>-1</sup> (13-24% of total household energy use in Melbourne and 76-79% in Brisbane). Detailed end use analysis of the five Melbourne households showed that shower use (11-61% WRE), hot water system efficiency losses (8-31% WRE) and clothes washer usage (4-17% WRE) contributed most to differences in WRE between households. Findings highlighted shower use as a consistent influence on WRE across households, and suggest further investigation of shower programs as a potentially effective demand management measure for both water and energy in households. The work highlights the importance of consistent messaging for both water and energy efficiency, and suggests that a focus on both human and technical characteristics of households is needed for effective management of combined water and energy use. (C) 2016 Elsevier Ltd. All rights reserved.

C1 [Binks, Amanda N.; Kenway, Steven J.; Lant, Paul A.] Univ Queensland, Sch Chem Engn, St Lucia, Qld 4072, Australia.

[Head, Brian W.] Univ Queensland, Social Sci Res Inst, St Lucia, Qld 4072, Australia.

RP Binks, AN (reprint author), Univ Queensland, Sch Chem Engn, St Lucia, Qld 4072, Australia.

EM a.binks@uq.edu.au; s.kenway@uq.edu.au; paul.lant@uq.edu.au;  
brian.head@uq.edu.au

RI Kenway, Steven/J-8031-2013

OI Kenway, Steven/0000-0002-2095-9388

FU Smart Water Fund; Australian Research Council's Linkage Projects funding  
scheme [LP120200745]

FX The authors wish to acknowledge the generous contributions to this research made by Peter Roberts, Francis Pamminer and other Yarra Valley Water, City West Water, and South East Water staff. We also thank Melbourne Water, Jemena, Eawag and ETH Zurich Bits to Energy Laboratory, and all household participants. The authors thank Dr Marguerite Renouf and Dr Thomas Taimre for their comments. Finally, the authors would like to thank all of the reviewers for their constructive and insightful feedback. This research is supported by the Smart Water Fund in addition to the Australian Research Council's Linkage Projects funding scheme (project number LP120200745).

CR Arpke A, 2006, J IND ECOL, V10, P169, DOI 10.1162/108819806775545312

Beal CD, 2012, ENERG BUILDINGS, V55, P422, DOI 10.1016/j.enbuild.2012.08.004

Beal CD, 2013, J CLEAN PROD, V60, P116, DOI 10.1016/j.jclepro.2011.09.007

Beal C. D., 2011, S E QUEENSLAND RESID

Boait PJ, 2012, ENER G BUILDINGS, V54, P160, DOI 10.1016/j.enbuild.2012.07.011  
 Bohm B, 2013, ENER G CONVERS MANAGE, V67, P152, DOI 10.1016/j.enconman.2012.11.002  
 Cheng CL, 2002, ENER G BUILDINGS, V34, P261, DOI 10.1016/S0378-7788(01)00097-4  
 Commonwealth of Australia, 2008, EN US AUSTR RES SECT  
 Commonwealth of Australia, 2013, NAT GREENH ACC FACT  
 Cook S., 2012, CSIRO WATER HLTH COU  
 Fielding KS, 2012, ENVIRON EDUC RES, V18, P171, DOI 10.1080/13504622.2011.592936  
 Giglio T, 2014, ENER G POLICY, V72, P43, DOI 10.1016/j.enpol.2014.04.036  
 Gilg A, 2005, FUTURES, V37, P481, DOI 10.1016/j.futures.2004.10.016  
 Hansen LG, 1996, LAND ECON, V72, P66, DOI 10.2307/3147158  
 Head B.W., 2013, HDB INNOVATION PUBLI  
 Hernandez P, 2012, RENEW SUST ENER G REV, V16, P170, DOI 10.1016/j.rser.2011.07.144  
 Jeong SH, 2014, ENER G BUILDINGS, V80, P114, DOI 10.1016/j.enbuild.2014.05.013  
 Kar AK, 1996, ENER G CONVERS MANAGE, V37, P1445, DOI 10.1016/0196-8904(95)00230-8  
 Kenway S., 2008, ENER G USE PROVISION  
 Kenway SJ, 2011, J WATER CLIM CHANGE, V2, P247, DOI 10.2166/wcc.2011.005  
 Kenway SJ, 2011, WATER SCI TECHNOL, V63, P1983, DOI 10.2166/wst.2011.070  
 Kenway SJ, 2013, ENER G BUILDINGS, V58, P378, DOI 10.1016/j.enbuild.2012.08.035  
 Knoeri C, 2016, J CLEAN PROD, V132, P229, DOI 10.1016/j.jclepro.2015.08.079  
 Kurz T, 2005, J APPL SOC PSYCHOL, V35, P1281, DOI 10.1111/j.1559-1816.2005.tb02171.x  
 Kuusk K, 2014, ENER G BUILDINGS, V77, P313, DOI 10.1016/j.enbuild.2014.03.026  
 Lai CM, 2014, ENER G BUILDINGS, V77, P416, DOI 10.1016/j.enbuild.2014.03.071  
 Martinez-Espineira R, 2014, J ENVIRON MANAGE, V133, P174, DOI 10.1016/j.jenvman.2013.12.002  
 Nasrabadi T, 2013, INT J ENVIRON RES, V7, P235  
 Newton P, 2012, ENVIRON BEHAV, V44, P107, DOI 10.1177/0013916510390494  
 Parker DS, 2003, ENER G BUILDINGS, V35, P863, DOI 10.1016/S0378-7788(02)00244-X  
 Roberts P., 2012, 2011 APPLIANCE STOCK  
 Rothausen SGSA, 2011, NAT CLIM CHANGE, V1, P210, DOI 10.1038/NCLIMATE1147  
 Shimoda Y, 2010, ENER G, V35, P4880, DOI 10.1016/j.energy.2010.08.043  
 Slys D, 2014, ENER G BUILDINGS, V71, P1, DOI 10.1016/j.enbuild.2013.11.088  
 Strengers Y, 2012, GLOBAL ENVIRON CHANG, V22, P754, DOI 10.1016/j.gloenvcha.2012.04.004  
 Strengers Y, 2011, J CONSUM CULT, V11, P319, DOI 10.1177/1469540511417994  
 Tapper A., 1996, WEATHER CLIMATE AUST  
 UN, 2014, WORLD URB PROSP 2014  
 Vieira AS, 2014, ENER G BUILDINGS, V82, P222, DOI 10.1016/j.enbuild.2014.07.007  
 Zhou YC, 2013, ENVIRON SCI TECHNOL, V47, P10753, DOI 10.1021/es304816h

NR 40

TC 9

Z9 9

U1 5

U2 38

PU ELSEVIER SCI LTD

PI OXFORD

PA THE BOULEVARD, LANGFORD LANE, KIDLINGTON, OXFORD OX5 1GB, OXON, ENGLAND

SN 0959-6526

EI 1879-1786

J9 J CLEAN PROD

JI J. Clean Prod.

PD NOV 1

PY 2016

VL 135

BP 892

EP 906

DI 10.1016/j.jclepro.2016.06.091

PG 15

WC GREEN &amp; SUSTAINABLE SCIENCE &amp; TECHNOLOGY; Engineering, Environmental;

Environmental Sciences

SC Science &amp; Technology - Other Topics; Engineering; Environmental Sciences



& Ecology  
 GA DV3AH  
 UT WOS:000382792900078  
 DA 2018-05-03  
 ER

PT J  
 AU Hou, J  
 Liu, YS  
 Wu, Y  
 Zhou, N  
 Feng, W  
 AF Hou, Jing  
 Liu, Yisheng  
 Wu, Yong  
 Zhou, Nan  
 Feng, Wei

TI Comparative study of commercial building energy-efficiency retrofit policies in four pilot cities in China

SO ENERGY POLICY

LA English

DT Article

DE Existing commercial building; Energy efficiency retrofit; Incentive policy; Technical solution; Cost-benefit; Barrier

ID TIANJIN

AB The energy efficiency of existing commercial buildings is more challenging to regulate and improve than the energy efficiency of new constructions. In 2011 and 2012, the Chinese Government selected four cities—Shanghai, Tianjin, Shenzhen, and Chongqing— to implement pilot commercial building energy efficiency retrofit program. Based on site surveys and expert interviews in these pilot cities, this research conducted a comparative analysis on incentive policies of local city level. The analysis results show that policy designs of existing commercial buildings should be further improved. The aspects that influence the implementation effect in the future, such as subsidy level, installments, and business model promotion, should be specified in the policy clauses. Referring to the technical solution and cost-benefit in Chongqing, we found that lighting system is the most common retrofit objects while envelope system is the least common one. And the subsidy incentive is greatest for educational buildings, followed by office buildings. In the end, we further discussed the problems and obstacles in commercial building retrofit market, and provided a series of recommendations. (C) 2015 Elsevier Ltd. All rights reserved.

C1 [Hou, Jing; Liu, Yisheng] Beijing Jiaotong Univ, Beijing 100044, Peoples R China.

[Wu, Yong] Minist Housing & Urban Rural Dev, Beijing 100835, Peoples R China.

[Zhou, Nan; Feng, Wei] Univ Calif Berkeley, Lawrence Berkeley Natl Lab, Berkeley, CA 94720 USA.

RP Hou, J (reprint author), Beijing Jiaotong Univ, 3 Shangyuancun, Beijing 100044, Peoples R China.

EM houjing0130@gmail.com; yshliu1@bjtu.edu.cn; wuyong0715@163.com; nzhou@lbl.gov; weifeng@lbl.gov

FU National Natural Science Foundation of China [71173011]; Ministry of Housing and Urban-Rural Development [10401020908]; China Scholarship Council [201407090017]

FX This work was supported by the National Natural Science Foundation of China, and the Ministry of Housing and Urban-Rural Development under Contracts No. 71173011 and No. 10401020908, respectively. The authors express their gratitude for the support of the China Scholarship Council, File No. 201407090017. Furthermore, the authors express sincere appreciation to the government officials and industry experts from both MOHURD and the four pilot cities for their help and contributions during the investigation for this report.

CR Azar E, 2014, ENER POLICY, V67, P459, DOI 10.1016/j.enpol.2013.12.031

BECRC (Building Energy Conservation Research Center Tsinghua University), 2014, ANN REP DEV

BUILD EN

BP Group, 2010, BP STAT REV WORLD EN

CGPRC (Central Government of People's Republic of China), 2007, REG REINF EN EFF PUB  
CGPRC (Central Government of People's Republic of China), 2014, CHIN NEW URB PLAN 20  
EIA (Energy Information Administration), 2010, INT EN OUTL WORLD EN  
Feng W., 2014, EVALUATION ENERGY SA  
Gong C., 2014, CONSTR SCI TECHNOL, V10, P51  
He D., 2014, J CHONGQING U SCI TE, V16, P112  
He D., 2013, CHONGQING ARCHITECTU, V6, P45  
Hong TZ, 2015, APPL ENERG, V159, P298, DOI 10.1016/j.apenergy.2015.09.002  
Hong TZ, 2015, ENERG POLICY, V87, P187, DOI 10.1016/j.enpol.2015.09.013  
Hong TZ, 2009, ENERG BUILDINGS, V41, P426, DOI 10.1016/j.enbuild.2008.11.003  
Hou J., 2014, RES MARKETIZATION WA, V6, P1  
Jiang Y., 2010, CONSTR SCI TECHNOL, V22, P20  
Lee SH, 2015, ENERGY, V90, P738, DOI 10.1016/j.energy.2015.07.107  
Lee SH, 2015, ENERGY, V89, P1087, DOI 10.1016/j.energy.2015.06.112  
Li J, 2015, J CLEAN PROD, V90, P326, DOI 10.1016/j.jclepro.2014.11.061  
Liu huabing, 2012, RES INCENTIVE POLICY  
MoC (Ministry of Construction China), 1993, EN CONS DES STAND BU  
MOF (Ministry of Finance China) MOHURD (Ministry of Housing and Urban-Rural Development), 2011,  
GUID FURTH PROM BUIL  
MOP (Ministry of Finance China) MOHURD (Ministry of Housing and Urban-Rural Development), 2012,  
12 5 YEAR PLAN CHIN  
National Bureau of Statistics (NBS), 2013, CHIN STAT YB 2013  
Peng CH, 2014, ENERG BUILDINGS, V78, P123, DOI 10.1016/j.enbuild.2014.04.023  
Xing JC, 2015, ENERG BUILDINGS, V87, P14, DOI 10.1016/j.enbuild.2014.10.045  
Xu P, 2013, ENERG POLICY, V53, P76, DOI 10.1016/j.enpol.2012.10.002  
Xu Q, 2012, CONSTR SCI TECHNOL, V10, P28  
Zhang D., 2014, CONSTR SCI TECHNOL, V10, P41  
Zhao J, 2009, ENERG POLICY, V37, P2092, DOI 10.1016/j.enpol.2008.11.043

NR 29  
TC 9  
Z9 10  
U1 7  
U2 36  
PU ELSEVIER SCI LTD  
PI OXFORD  
PA THE BOULEVARD, LANGFORD LANE, KIDLINGTON, OXFORD OX5 1GB, OXON, ENGLAND  
SN 0301-4215  
EI 1873-6777  
J9 ENERG POLICY  
JI Energy Policy  
PD JAN  
PY 2016  
VL 88  
BP 204  
EP 215  
DI 10.1016/j.enpol.2015.10.016  
PG 12  
WC Economics; Energy & Fuels; Environmental Sciences; Environmental Studies  
SC Business & Economics; Energy & Fuels; Environmental Sciences & Ecology  
GA CZ0AE  
UT WOS:000366766700020  
DA 2018-05-03  
ER

PT J  
AU Izadyar, N  
Ghadamian, H  
Ong, HC

- Moghadam, Z  
 Tong, CW  
 Shamshirband, S  
 AF Izadyar, Nima  
 Ghadamian, Hossein  
 Ong, Hwai Chyuan  
 Moghadam, Zeinab  
 Tong, Chong Wen  
 Shamshirband, Shahaboddin
- TI Appraisal of the support vector machine to forecast residential heating demand for the District Heating system based on the monthly overall natural gas consumption
- SO ENERGY  
 LA English  
 DT Article  
 DE Residential natural gas demand; DHS (District heating system); Estimation; Wavelet and firefly algorithms (FFAs); SVM (Support vector machine)
- ID PARTICLE SWARM OPTIMIZATION; FIREFLY ALGORITHMS; DISCRETE OPTIMIZATION; NEURAL-NETWORKS; NORTHERN SPAIN; ERROR MEASURES; LEAST-SQUARES; CUCKOO SEARCH; REGRESSION; CLASSIFICATION
- AB DHS (District Heating System) is one of the most efficient technologies which has been used to meet residential thermal demand. In this study, the most accurate forecasting of the residential heating demand is investigated via soft computing method. The objective of this study is to obtain the most accurate prediction of the residential heating consumption to employ forecasting result for designing optimum DHS system as a possible substitute of a pipeline natural gas in BAHARESTAN Town. For this purpose, three Support Vector Machine (SVM) models namely SVM coupled with the discrete wavelet transform (SVM-Wavelet), the firefly algorithm (SVM-FFA) and using the radial basis function (SVM-RBF) were analyzed. The estimation and prediction results of these models were compared with two other soft computing methods (ANN (Artificial Neural Network) and GP (Genetic programming)) by using three statistical indicators i.e. RMSE (root means square error), coefficient of determination (R-2) and Pearson coefficient (r). Based on the experimental outputs, the SVM-Wavelet method can lead to slightly accurate forecasting of the monthly overall natural gas demand. (C) 2015 Elsevier Ltd. All rights reserved.
- C1 [Izadyar, Nima; Ong, Hwai Chyuan; Tong, Chong Wen] Univ Malaya, Fac Engn, Dept Mech Engn, Kuala Lumpur 50603, Malaysia.  
 [Ghadamian, Hossein] MERC, Dept Energy, Tehran, Iran.  
 [Moghadam, Zeinab] Edith Cowan Univ, Sch Engn, Perth, WA 6027, Australia.  
 [Shamshirband, Shahaboddin] Univ Malaya, Fac Comp Sci & Informat Technol, Dept Comp Syst & Informat Technol, Kuala Lumpur 50603, Malaysia.
- RP Shamshirband, S (reprint author), Univ Malaya, Fac Comp Sci & Informat Technol, Dept Comp Syst & Informat Technol, Kuala Lumpur 50603, Malaysia.  
 EM onghc@um.edu.my; shamshirband@um.edu.my  
 RI ong, hc/A-9492-2013; Chong, Wen Tong/B-8396-2010; Shamshirband, Shahaboddin/K-2544-2013  
 OI ong, hc/0000-0002-6731-4800; Chong, Wen Tong/0000-0002-9208-9908; Shamshirband, Shahaboddin/0000-0002-6605-498X
- FU Ministry of Higher Education, Malaysia; University of Malaya, Kuala Lumpur, Malaysia [HIRG: UM.C/HIR/MOHE/ENG/06 (D000006-16001), SATU: RU022H-2014]
- FX The authors would like to acknowledge the Ministry of Higher Education, Malaysia and The University of Malaya, Kuala Lumpur, Malaysia for the financial support under HIRG: UM.C/HIR/MOHE/ENG/06 (D000006-16001) and SATU: RU022H-2014.
- CR Adamowski J, 2011, J HYDROL, V407, P28, DOI 10.1016/j.jhydrol.2011.06.013  
 Alonso J, 2015, COMPUT ELECTRON AGR, V110, P36, DOI 10.1016/j.compag.2014.10.001  
 Amjady N, 2009, ENERGY, V34, P46, DOI 10.1016/j.energy.2008.09.020  
 Angelo JS, 2015, ADV ENG SOFTW, V80, P101, DOI 10.1016/j.advengsoft.2014.09.015  
 ARMSTRONG JS, 1992, INT J FORECASTING, V8, P69, DOI 10.1016/0169-2070(92)90008-W

- ARMSTRONG JS, 1995, J FORECASTING, V14, P67, DOI 10.1002/for.3980140106  
ASCE Task Committee, 2000, J HYDROL ENG, V5, P124  
ASCE Task Committee, 2000, J HYDROL ENG, V5, P115  
Asefa T, 2006, J HYDROL, V318, P7, DOI 10.1016/j.jhydrol.2005.06.001  
Assareh E, 2010, ENERGY, V35, P5223, DOI 10.1016/j.energy.2010.07.043  
Bao YK, 2013, NEUROCOMPUTING, V117, P98, DOI 10.1016/j.neucom.2013.01.027  
Basu M, 2015, INT J ELEC POWER, V69, P304, DOI 10.1016/j.ijepes.2015.01.015  
Beheshti Z, 2015, INFORM SCIENCES, V299, P58, DOI 10.1016/j.ins.2014.12.016  
Ch S, 2014, NEUROCOMPUTING, V129, P279, DOI 10.1016/j.neucom.2013.09.030  
Dorigo M, 1999, ARTIF LIFE, V5, P137, DOI 10.1162/106454699568728  
DORIGO M, 2003, INT SERIES OPERATION, V57, P250  
Fister I, 2013, SWARM EVOL COMPUT, V13, P34, DOI 10.1016/j.swevo.2013.06.001  
Fister I, 2013, ELSEV INSIGHT, P73, DOI 10.1016/B978-0-12-405163-8.00004-1  
Fister I, 2015, APPL MATH COMPUT, V252, P155, DOI 10.1016/j.amc.2014.12.006  
Fister J.I., 2013, ELEKT VESTN, V80, P1  
Fu MY, 2015, NEUROCOMPUTING, V155, P159, DOI 10.1016/j.neucom.2014.12.035  
Nieto PJG, 2014, ECOL ENG, V73, P192, DOI 10.1016/j.ecoleng.2014.09.042  
Nieto PJG, 2013, ENVIRON RES, V122, P1, DOI 10.1016/j.envres.2013.01.001  
Grosswindhagera S, 2011, P 31 INT S FOR PRAG  
Jain P, 2009, COMPUT BIOL CHEM, V33, P216, DOI 10.1016/j.compbiolchem.2009.04.004  
Ji Y, 2013, PATTERN RECOGN, V46, P914, DOI 10.1016/j.patcog.2012.08.010  
Kalteh AM, 2013, COMPUT GEOSCI-UK, V54, P1, DOI 10.1016/j.cageo.2012.11.015  
Kanimozhi T, 2015, NEUROCOMPUTING, V151, P1099, DOI 10.1016/j.neucom.2014.07.078  
Kaytez F, 2015, INT J ELEC POWER, V67, P431, DOI 10.1016/j.ijepes.2014.12.036  
Koza JR, GENETIC PROGRAMMING  
Kumar M, 2015, EXPERT SYST APPL, V42, P3433, DOI 10.1016/j.eswa.2014.12.020  
Lai Z, COMP SCI AUT ENG CSA, DOI [10.1109/CSAE.2011.5953247, DOI 10.1109/CSAE.2011.5953247]  
Lu WZ, 2005, CHEMOSPHERE, V59, P693, DOI 10.1016/j.chemosphere.2004.10.032  
Ma ZY, 2014, ENERGBUILDINGS, V85, P464, DOI 10.1016/j.enbuild.2014.09.048  
Massan SUR, 2015, APPL SOFT COMPUT, V27, P450, DOI 10.1016/j.asoc.2014.09.048  
Miha Kovacic, 2014, ENERGY MARCH, V66, P273  
Oguz Kaynar, 2011, EGU GEN ASSEMBLY, P7781  
Park Jinsoo, 2013, J KOREAN I IND ENG, V39, P247  
Park TC, 2010, KOREAN J CHEM ENG, V27, P1063, DOI 10.1007/s11814-010-0220-9  
Rajasekaran S, 2008, OCEAN ENG, V35, P1578, DOI 10.1016/j.oceaneng.2008.08.004  
Ramedani Z, 2014, RENEW SUST ENERGBUILDINGS, V39, P1005, DOI 10.1016/j.rser.2014.07.108  
Szoplik J, 2015, ENERGY, V85, P208, DOI 10.1016/j.energy.2015.03.084  
Taspinar F, 2013, ENERGBUILDINGS, V56, P23, DOI 10.1016/j.enbuild.2012.10.023  
Teske A, 2015, APPL SOFT COMPUT, V29, P52, DOI 10.1016/j.asoc.2014.11.059  
Vapnik V. N., 1998, STAT LEARNING THEORY  
Wu KP, 2009, PATTERN RECOGN, V42, P710, DOI 10.1016/j.patcog.2008.08.030  
Yang XS, 2014, NEURAL COMPUT APPL, V24, P169, DOI 10.1007/s00521-013-1367-1  
Yang XS, 2013, ENG COMPUT-GERMANY, V29, P175, DOI 10.1007/s00366-012-0254-1  
Yang XS, 2009, LECT NOTES COMPUT SC, V5792, P169, DOI 10.1007/978-3-642-04944-6\_14  
Zhang R, 2011, EXPERT SYST APPL, V38, P14225, DOI 10.1016/j.eswa.2011.04.235

NR 50

TC 9

Z9 10

U1 2

U2 13

PU PERGAMON-ELSEVIER SCIENCE LTD

PI OXFORD

PA THE BOULEVARD, LANGFORD LANE, KIDLINGTON, OXFORD OX5 1GB, ENGLAND

SN 0360-5442

EI 1873-6785

J9 ENERGY

JI Energy

PD DEC 15

PY 2015  
 VL 93  
 BP 1558  
 EP 1567  
 DI 10.1016/j.energy.2015.10.015  
 PN 2  
 PG 10  
 WC Thermodynamics; Energy & Fuels  
 SC Thermodynamics; Energy & Fuels  
 GA CZ9HU  
 UT WOS:000367409500032  
 DA 2018-05-03  
 ER

PT J  
 AU Dineen, D  
     Rogan, F  
     Gallachoir, BPO  
 AF Dineen, D.  
     Rogan, F.  
     Gallachoir, B. P. O.

TI Improved modelling of thermal energy savings potential in the existing residential stock using a newly available data source

SO ENERGY

LA English

DT Article

DE Residential; Energy; Archetype; Model; Retrofit; Bottom-up

ID DOMESTIC ENERGY; BUILDING STOCK; FUEL POVERTY; IRELAND; SECTOR; CONSUMPTION; EFFICIENCY; COMFORT; OWNERSHIP; BENEFIT

AB This paper presents a novel bottom up approach to modelling the energy savings potential of energy efficiency improvement measures to be applied through retrofit of the existing dwelling stock. It takes advantage of a newly available, rich dataset on the construction characteristics of the 2011 housing stock in Ireland. The methodological innovation centres on the use of wall construction type in the modelling and analysis. While Ireland is the focus, this approach is applicable to any EU member state for which data on dwelling characteristics exists from surveys carried as part of Energy Performance Certificate calculations. The model is calibrated to the national energy balance for 2011 by varying the internal temperature assumptions. Sensitivity analysis is performed on the effects of internal temperature and rebound. The paper also highlights some limitations posed by data availability on the accuracy and sophistication of models that can currently be developed, specifically in the Irish case. (C) 2015 Elsevier Ltd. All rights reserved.

C1 [Dineen, D.; Rogan, F.; Gallachoir, B. P. O.] Natl Univ Ireland Univ Coll Cork, Environm Res Inst, Cork, Ireland.

[Gallachoir, B. P. O.] Natl Univ Ireland Univ Coll Cork, Dept Civil & Environm Engn, Cork, Ireland.

RP Dineen, D (reprint author), Natl Univ Ireland Univ Coll Cork, Environm Res Inst, Lee Rd, Cork, Ireland.

EM d.g.dineen@umail.ucc.ie

OI O Gallachoir, Brian/0000-0002-6608-5997; Rogan, Fionn/0000-0002-7050-6301

FU SEAI through the Irish Research Council Science, Engineering and Technology (IRC-SET) Scholarship programme; SEAI

FX Denis Dineen's PhD research was funded by SEAI through the Irish Research Council Science, Engineering and Technology (IRC-SET) Scholarship programme. The authors acknowledge the data, useful discussions and support provided by SEAI.

CR Ahern C, 2013, ENER POLICY, V55, P139, DOI 10.1016/j.enpol.2012.11.039

Aydinalp-Koksal M, 2008, APPL ENERG, V85, P271, DOI 10.1016/j.apenergy.2006.09.012

Baker P, 2011, 10 GLASG CAL U

Booth A. T., 2011, BUILD ENVIRON, V48, P35

Cayla JM, 2011, ENER POLICY, V39, P7874, DOI 10.1016/j.enpol.2011.09.036

Cayre E, 2011, ECEEE 2011 SUMMER ST  
 Clinch JP, 2000, ENERG POLICY, V28, P1, DOI 10.1016/S0301-4215(99)00080-4  
 Clinch JP, 2001, ENVIRON MODELL SOFTW, V16, P87, DOI 10.1016/S1364-8152(00)00067-0  
 Clinch JP, 2003, ENERG ECON, V25, P565, DOI 10.1016/S0140-9883(03)00051-3  
 Clinch JP, 2001, ENERG POLICY, V29, P113, DOI 10.1016/S0301-4215(00)00110-5  
 CSO, 2012, CENS DAT  
 Daly H, 2010, BOTTOM UP ENERGY DEM  
 DECC, 2005, STAND ASS PROC EN RA  
 Dennehy E., 2013, ENERGY RESIDENTIAL S  
 Department\_of\_the\_Environment, 2012, HOUS STAT DAT  
 Dineen D, 2010, INT EN POL EV C PAR  
 Energy\_saving\_trust, 2013, HOM EN EFF DAT  
 Giraudet L, 2010, IEW WORKSH 2010  
 Hamilton IG, 2013, ENERGY EFFICIENCY BR, P462  
 Healy JD, 2004, ENERG POLICY, V32, P207, DOI 10.1016/S0301-4215(02)00265-3  
 Healy JD, 2002, APPL ENERG, V73, P329, DOI 10.1016/S0306-2619(02)00115-0  
 Hong SH, 2009, BUILD ENVIRON, V44, P1228, DOI 10.1016/j.buildenv.2008.09.003  
 Hull D, 2009, ENERG POLICY, V37, P5363, DOI 10.1016/j.enpol.2009.07.059  
 Hyland M, 2012, DEP EC DISCUSSION PA  
 [Anonymous], 2008, 137902008 ISO  
 Kannan R, 2009, APPL ENERG, V86, P416, DOI 10.1016/j.apenergy.2008.08.005  
 Kavgic M, 2010, BUILD ENVIRON, V45, P1683, DOI 10.1016/j.buildenv.2010.01.021  
 Kelly S, 2011, ENERGY, V36, P5610, DOI 10.1016/j.energy.2011.07.009  
 Leahy E, 2012, ELECT APPLIANCE OWNE  
 Leahy E, 2010, ENERG POLICY, V38, P4265, DOI 10.1016/j.enpol.2010.03.056  
 Magalhaes SMC, 2014, ENERG BUILDINGS, V70, P167, DOI 10.1016/j.enbuild.2013.11.054  
 Mata Ar, 2013, ENERGY BUILD, V56, P100  
 Mata E, 2013, ENERG POLICY, V55, P404, DOI 10.1016/j.enpol.2012.12.023  
 Natarajan S, 2011, ENERG BUILDINGS, V43, P2602, DOI 10.1016/j.enbuild.2011.05.013  
 O'Doherty J, 2008, APPL ENERG, V85, P650, DOI 10.1016/j.apenergy.2008.01.001  
 Preval N, 2010, ENERG POLICY, V38, P3965, DOI 10.1016/j.enpol.2010.03.020  
 Rogan F, 2014, ENERG EFFIC, V7, P441, DOI 10.1007/s12053-013-9231-9  
 Scheer J, 2012, ENERGY EFFIC, V5  
 SEAL, 2012, DWELL EN ASS PROC  
 SEAL, 2013, EN BAL  
 SEAI, 2012, DEAP MAN VERS 3 2 1  
 Stevens G, 2013, ECEEE 2013 SUMMER ST  
 Summerfield AJ, 2012, BUILD RES INF, V40, P391, DOI 10.1080/09613218.2012.693839  
 Summerfield A J, 2011, 12 C INT BUILD PERF  
 Sunikka-Blank M., 2012, BUILDING RES INFORM  
 Swan LG, 2009, RENEW SUST ENERG REV, V13, P1819, DOI 10.1016/j.rser.2008.09.033  
 [Anonymous], 2011, FUTUREFIT REP 1  
 [Anonymous], 2013, FUTUREFIT REP 2

NR 48

TC 9

Z9 9

U1 0

U2 9

PU PERGAMON-ELSEVIER SCIENCE LTD

PI OXFORD

PA THE BOULEVARD, LANGFORD LANE, KIDLINGTON, OXFORD OX5 1GB, ENGLAND

SN 0360-5442

EI 1873-6785

J9 ENERGY

JI Energy

PD OCT

PY 2015

VL 90

BP 759  
 EP 767  
 DI 10.1016/j.energy.2015.07.105  
 PN 1  
 PG 9  
 WC Thermodynamics; Energy & Fuels  
 SC Thermodynamics; Energy & Fuels  
 GA CV4PD  
 UT WOS:000364248100069  
 DA 2018-05-03  
 ER

PT J  
 AU Ma, JJ  
 Liu, LQ  
 Su, B  
 Xie, BC  
 AF Ma, Jia-Jun  
 Liu, Li-Qiu  
 Su, Bin  
 Xie, Bai-Chen

TI Exploring the critical factors and appropriate polices for reducing  
 energy consumption of China's urban civil building sector  
 SO JOURNAL OF CLEANER PRODUCTION

LA English  
 DT Article

DE Civil building sector; Energy saving potential; Hybrid input-output  
 model; Scenario analysis

ID LIFE-CYCLE; PUBLIC BUILDINGS; EMBODIED ENERGY; EFFICIENCY STANDARDS; HOT  
 SUMMER; HONG-KONG; CONSTRUCTION; IMPACTS; IMPLEMENTATION; ENVIRONMENT

AB The embodied and operating energy consumption of the civil building sector accounts for more than 30% of the national consumption. It is of great significance to probe the energy saving potential of the building sector and to explore the critical factors responsible for its energy saving practice, which may greatly benefit carbon emission reduction in the process of urbanization. In this paper, we develop a series of formulations to calculate both embodied and operating energy based on hybrid energy input-output model. Taking 2011-2050 as the study period, we combined the embodied and operating energy and designed six scenarios to comprehensively quantify the impacts of three factors: new building floor areas, energy efficiency standards and its implementation rate on the energy saving potential. Furthermore, sensitivity analysis was conducted to dissect the influence of the corresponding factors. The results show that improved standards and less new building floor areas will be the most effective ways to reduce energy consumption and that the best energy saving practice can save up to 20 billion tons of coal equivalent (tce) during the study period. The focus of policy reforms may be varied according to the times and regions. Energy saving technology development and more emphasis on key areas will reduce building energy consumption significantly in the short term, while household lifestyle changes, as well as improved building energy efficiency, should be given a higher priority in the long run. (C) 2014 Elsevier Ltd. All rights reserved.

C1 [Ma, Jia-Jun; Liu, Li-Qiu; Xie, Bai-Chen] Tianjin Univ, Coll Management & Econ, Tianjin 300072, Peoples R China.

[Su, Bin] Natl Univ Singapore, Energy Studies Inst, Singapore 117548, Singapore.

[Xie, Bai-Chen] Chinese Acad Sci, Ctr Energy & Environm Policy, Beijing 100190, Peoples R China.

RP Xie, BC (reprint author), Tianjin Univ, Coll Management & Econ, Tianjin 300072, Peoples R China.

EM xiebaichen@tju.edu.cn

RI SU, BIN/B-7990-2011

OI SU, BIN/0000-0003-4273-7054; Xie, Bai-Chen/0000-0002-9588-830X

FU National Natural Science Foundation of China [71003072, 71373172];

MOHURD (Ministry of Housing and Urban-Rural Development of China)

[11-R1-338]; National Development and Reform Commission [2012023]

FX We gratefully acknowledge the anonymous reviewers and professor Cui-Hong

Yang of Chinese Academy of Sciences, their constructive comments and suggestions played an important role in improving the quality of the manuscript. We are also very grateful for the financial supports from the National Natural Science Foundation of China under grants Nos.71003072 and 71373172, the support from MOHURD (Ministry of Housing and Urban-Rural Development of China) under grant No.11-R1-338 and the support from National Development and Reform Commission under grant 2012023.

- CR Agnieszka Z.-J., 2012, BUILD ENVIRON, V58, P135  
 CAE, 2011, RES MIDL TERM 2030 2  
 Cai WG, 2009, ENERG POLICY, V37, P2054, DOI 10.1016/j.enpol.2008.11.037  
 Chang Y, 2011, ENERG POLICY, V39, P6321, DOI 10.1016/j.enpol.2011.07.033  
 Chang YA, 2010, ENERG POLICY, V38, P6597, DOI 10.1016/j.enpol.2010.06.030  
 Chau CK, 2007, J CLEAN PROD, V15, P1840, DOI 10.1016/j.jclepro.2006.10.004  
 Chen SQ, 2008, ENERG BUILDINGS, V40, P654, DOI 10.1016/j.enbuild.2007.04.022  
 Chen TY, 2001, ENERGY, V26, P323, DOI 10.1016/S0360-5442(01)00006-8  
 Chen X., 1981, J SYST SCI MATH SCI, P69  
 Chow DHC, 2013, ENERG BUILDINGS, V57, P176, DOI 10.1016/j.enbuild.2012.11.012  
 Eom J, 2012, ENERGY, V46, P405, DOI 10.1016/j.energy.2012.08.009  
 Feng YP, 2009, ENERG POLICY, V37, P2060, DOI 10.1016/j.enpol.2008.12.033  
 Freire-Gonzalez J, 2011, ECOL MODEL, V223, P32, DOI 10.1016/j.ecolmodel.2011.09.001  
 Fu F, 2013, ENERGY, V49, P316, DOI 10.1016/j.energy.2012.10.021  
 Han MY, 2013, ENERG BUILDINGS, V64, P62, DOI 10.1016/j.enbuild.2013.04.006  
 Homod RZ, 2013, ENERG BUILDINGS, V60, P310, DOI 10.1016/j.enbuild.2012.10.034  
 Huang ZY, 2012, ENERG POLICY, V51, P374, DOI 10.1016/j.enpol.2012.08.036  
 Huberman N, 2008, ENERG BUILDINGS, V40, P837, DOI 10.1016/j.enbuild.2007.06.002  
 Huijuan W., 2010, SYST ENG THEORY PRAC, V30, P987  
 Huntzinger DN, 2009, J CLEAN PROD, V17, P668, DOI 10.1016/j.jclepro.2008.04.007  
 Jiang Y., 2013, ANN REPORT CHINA BUI  
 Jin ZX, 2009, ENERG POLICY, V37, P2066, DOI 10.1016/j.enpol.2008.12.005  
 Kong XF, 2012, ENERG POLICY, V41, P624, DOI 10.1016/j.enpol.2011.11.024  
 Li BZ, 2009, RENEW ENERG, V34, P1994, DOI 10.1016/j.renene.2009.02.015  
 Liang S, 2010, ECOL ECON, V69, P1805, DOI 10.1016/j.ecolecon.2010.04.019  
 Liu XL, 2009, ENERG BUILDINGS, V41, P1084, DOI 10.1016/j.enbuild.2009.05.016  
 Mardookhy M, 2014, J CLEAN PROD, V85, P241, DOI 10.1016/j.jclepro.2013.09.025  
 National Bureau of Statistics of China, 2012, CHIN STAT YB  
 Qiu B., 2010, URBAN STUD, V17, P1  
 Ramesh T, 2010, ENERG BUILDINGS, V42, P1592, DOI 10.1016/j.enbuild.2010.05.007  
 Sartori I, 2007, ENERG BUILDINGS, V39, P249, DOI 10.1016/j.enbuild.2006.07.001  
 Su B, 2013, ENERG POLICY, V56, P83, DOI 10.1016/j.enpol.2013.01.041  
 Su B, 2010, ENERG ECON, V32, P166, DOI 10.1016/j.eneco.2009.07.010  
 Tulsyan A, 2013, ENERG BUILDINGS, V58, P123, DOI 10.1016/j.enbuild.2012.11.015  
 Xu LY, 2013, ENERG POLICY, V57, P253, DOI 10.1016/j.enpol.2013.01.048  
 YANG Xiao-xian, 2007, ENERGY SAVING TECHNO, P7  
 Yohanis YG, 2002, ENERGY, V27, P77, DOI 10.1016/S0360-5442(01)00061-5  
 Zhang QY, 2004, ENERG BUILDINGS, V36, P1217, DOI 10.1016/j.enbuild.2003.08.002  
 Zhao J, 2009, ENERG POLICY, V37, P2079, DOI 10.1016/j.enpol.2008.11.041

NR 39

TC 9

Z9 9

U1 8

U2 41

PU ELSEVIER SCI LTD

PI OXFORD

PA THE BOULEVARD, LANGFORD LANE, KIDLINGTON, OXFORD OX5 1GB, OXON, ENGLAND

SN 0959-6526

EI 1879-1786

J9 J CLEAN PROD



JI J. Clean Prod.  
 PD SEP 15  
 PY 2015  
 VL 103  
 BP 446  
 EP 454  
 DI 10.1016/j.jclepro.2014.11.001  
 PG 9  
 WC GREEN & SUSTAINABLE SCIENCE & TECHNOLOGY; Engineering, Environmental;  
 Environmental Sciences  
 SC Science & Technology - Other Topics; Engineering; Environmental Sciences  
 & Ecology  
 GA CL5HQ  
 UT WOS:000356990800042  
 DA 2018-05-03  
 ER

PT J  
 AU Hicks, AL  
 Theis, TL  
 Zellner, ML  
 AF Hicks, Andrea L.  
 Theis, Thomas L.  
 Zellner, Moira L.  
 TI Emergent Effects of Residential Lighting Choices Prospects for Energy  
 Savings

SO JOURNAL OF INDUSTRIAL ECOLOGY

LA English

DT Review

DE agent-based modeling (ABM); complex systems; life cycle assessment  
 (LCA); light emitting diodes; lighting; rebound

ID ARTIFICIAL BEE COLONY; LIFE-CYCLE ASSESSMENT; INDUSTRIAL ECOLOGY;  
 DISCRETE-CHOICE; OPTIMIZATION; TECHNOLOGIES; CONSUMPTION; COMPLEXITY;  
 EVOLUTION; CENTURIES

AB Artificial lighting has allowed the decoupling of human activities from natural daylight hours. Electricity utilized for artificial lighting accounts for 18.8% of U.S. electricity consumption. Compact fluorescent lamp (CFL) and light-emitting diode (LED) options are more efficient and have longer lifetimes than conventional incandescent bulbs, but the question remains about the actual energy savings likely to be realized through more efficient lighting delivery systems. This uncertainty influences the rate of adoption and use of efficient lighting technology (and thus the extent and time lags of efficiency gains). Once adopted, gains in efficiency can lead to rebound effects that eliminate these gains and, paradoxically, lock society into increased use of energy. In this study, an agent-based model and complex systems approach is used to understand how available information and perceptions of different lighting options influence adoption and use, and the potential impact of the rebound effect to reduce the energy savings of energy-efficient lighting options in a residential setting. Individual households and their decisions are modeled to create overall population-level consumption data. The multifunctionality of LED lighting may cause consumers to use significantly more light, creating the potential for both rebound and backfire to occur. The results indicate that the adoption of CFL and LED lighting will decrease residential energy consumption if consumers continue to use the same amount or slightly more light; however, when an expansion of lit spaces is included or a large increase in lighting usage occurs, energy consumption will increase and, over time, reduce or completely erode energy savings.

C1 [Hicks, Andrea L.; Theis, Thomas L.] Univ Illinois, Inst Environm Sci & Policy, Chicago, IL 60612 USA.  
 [Zellner, Moira L.] Univ Illinois, Dept Urban Planning & Policy, Chicago, IL 60612 USA.

RP Hicks, AL (reprint author), Univ Illinois, Inst Environm Sci & Policy, 2121 West Taylor SPHW MC 673,  
 Chicago, IL 60612 USA.

EM ahicks6@uic.edu

FU University of Illinois and Chicago (UIC) Predoctoral Fellowship; UIC  
 Chancellor's Fellowship; UIC Provost Award

- FX The authors thank the following sources of support for this work:  
 University of Illinois and Chicago (UIC) Predoctoral Fellowship, UIC  
 Chancellor's Fellowship, and the UIC Provost Award.
- CR Afman M., 2010, THESIS DELFT U TECHN  
 Batten DF, 2009, J IND ECOL, V13, P197, DOI 10.1111/j.1530-9290.2009.00115.x  
 Baynes TM, 2009, J IND ECOL, V13, P214, DOI 10.1111/j.1530-9290.2009.00123.x  
 Bollinger LA, 2011, J IND ECOL, V16, P176  
 Braziunas D., 2012, THESIS U TORONTO TOR  
 Chappin EJL, 2013, ENVIRON INNOV SOC TR, V7, P16, DOI 10.1016/j.eist.2012.11.005  
 ComEd, 2014, LIGHT YOUR WAY EN SA  
 Container Recycling Institute, 2014, BOTTL BILLS US MICH  
 Dahums J, 2014, J IND ECOL, V18, P883  
 Davis C, 2009, J IND ECOL, V13, P306, DOI 10.1111/j.1530-9290.2009.00122.x  
 DeLaurentis DA, 2009, J IND ECOL, V13, P247, DOI 10.1111/j.1530-9290.2009.00121.x  
 Druckman A, 2011, ENER POLICY, V39, P3572, DOI 10.1016/j.enpol.2011.03.058  
 Eggers F, 2011, TECHNOL FORECAST SOC, V78, P51, DOI 10.1016/j.techfore.2010.06.014  
 Ek E., 2010, ENER POLICY, V38, P1578  
 Fouquet R, 2006, ENER J, V27, P139  
 Gillingham K., 2012, NATURE, V493, P475  
 Girod B, 2011, INT J LIFE CYCLE ASS, V16, P3, DOI 10.1007/s11367-010-0240-z  
 Greening L., 2000, ENER POLICY, V28, P289  
 Gydesen A., 1991, P RIGHT LIGHT BRIGHT  
 Hertwich EG, 2005, J IND ECOL, V9, P85, DOI 10.1162/1088198054084635  
 Hetwisch E. G., 2005, J IND ECOL, V9, P85  
 Hicks AL, 2014, ENER EFFIC, V7, P323, DOI 10.1007/s12053-013-9226-6  
 Hicks AL, 2014, INT J LIFE CYCLE ASS, V19, P370, DOI 10.1007/s11367-013-0643-8  
 Horne M, 2005, ENER ECON, V27, P59, DOI 10.1016/j.eneco.2004.11.003  
 Huang A., 2009, LECT NOTES I COMPUTE, V4  
 Jaccard M, 2006, ENVIRON MODEL ASSESS, V11, P91, DOI 10.1007/s10666-005-9036-0  
 Keirstead J, 2012, J IND ECOL, V16, P889, DOI 10.1111/j.1530-9290.2012.00486.x  
 Kiger P., 2014, SEPARATING MYTH FACT  
 Kim WJ, 2005, TECHNOL FORECAST SOC, V72, P825, DOI 10.1016/j.techfore.2003.09.003  
 Luo J, 2013, APPL MATH COMPUT, V219, P10253, DOI 10.1016/j.amc.2013.04.001  
 Matson S., 2008, ARE COMPACT FLUORESC  
 Miller SA, 2013, J IND ECOL, V17, P352, DOI 10.1111/j.1530-9290.2012.00531.x  
 Navigant, 2012, EN SAV POT SOL STAT  
 Nordhaus W., 1997, EC NEW GOODS  
 OSRAM, 2009, LIF CYCL ASS ILL COM  
 Pacific Northwest National Laboratories, 2012, LIF CYCL ASS EN EN 2  
 Ramroth L, 2008, COMP LIFE CYCLE ANAL  
 Safarzadeh O, 2014, ANN NUCL ENERGY, V63, P295, DOI 10.1016/j.anucene.2013.08.011  
 Shafiei E, 2012, TECHNOL FORECAST SOC, V79, P1638, DOI 10.1016/j.techfore.2012.05.011  
 Shogren E., 2007, CFL BULBS HAVE HITCH  
 Sorrell S, 2009, ENER POLICY, V37, P1356, DOI 10.1016/j.enpol.2008.11.026  
 Spielmann M, 2008, J CLEAN PROD, V16, P1388, DOI 10.1016/j.jclepro.2007.08.001  
 Thiesen J, 2008, INT J LIFE CYCLE ASS, V13, P104, DOI 10.1065/lca2006.12.297  
 Thogersen J, 2010, ENER POLICY, V38, P7732, DOI 10.1016/j.enpol.2010.08.025  
 Tsao J., 2010, J PHYS D, V43, P1, DOI DOI 10.1088/0022-3727/43/35/354001  
 Tsao JY, 2010, P IEEE, V98, P1162, DOI 10.1109/JPROC.2009.2031669  
 Tsao JY, 2010, LEUKOS, V6, P259, DOI 10.1582/LEUKOS.2010.06.04001  
 Vassileva I, 2012, ENERGY, V46, P94, DOI 10.1016/j.energy.2012.02.069  
 Vivanco DF, 2014, J IND ECOL, V18, P380, DOI 10.1111/jiec.12118

NR 49

TC 9

Z9 9

U1 6

U2 34

PU WILEY-BLACKWELL

PI HOBOKEN  
PA 111 RIVER ST, HOBOKEN 07030-5774, NJ USA  
SN 1088-1980  
EI 1530-9290  
J9 J IND ECOL  
JI J. Ind. Ecol.  
PD APR  
PY 2015  
VL 19  
IS 2  
SI SI  
BP 285  
EP 295  
DI 10.1111/jiec.12281  
PG 11  
WC GREEN & SUSTAINABLE SCIENCE & TECHNOLOGY; Engineering, Environmental;  
Environmental Sciences  
SC Science & Technology - Other Topics; Engineering; Environmental Sciences  
& Ecology  
GA CG4GK  
UT WOS:000353243300013  
DA 2018-05-03  
ER

PT J  
AU Gokce, HU  
Gokce, KU  
AF Goekce, H. Ufuk  
Goekce, K. Umut

TI Multi dimensional energy monitoring, analysis and optimization system  
for energy efficient building operations

SO SUSTAINABLE CITIES AND SOCIETY

LA English

DT Article

DE Energy efficiency; Data Warehouse technologies; Wireless sensor networks

AB Monitoring, analysis and optimization of buildings' energy consumption is of central importance for the renovation and energy-efficient operation of buildings since it allows the identification and correction of inefficient energy usage. However, the monitoring and control systems adoption for building management and control applications is hampered by the unavailability of appropriate tool environments. This paper addresses the need for integration concepts, holistic monitoring, analysis methodologies, multi dimensional decision support and scenario based control strategies through the seamless integration of ubiquitous sensing infrastructures, service oriented architectures, BIM tools and Data Warehouse technologies. The developed system is demonstrated and validated in the Environmental Research Institute (ERI) building located on the campus of National University of Ireland-University College Cork. (C) 2013 Elsevier B.V. All rights reserved.

C1 [Goekce, H. Ufuk; Goekce, K. Umut] EOS Sustainable Energy Solut GmbH, D-30165 Hannover, Germany.

RP Gokce, HU (reprint author), EOS Sustainable Energy Solut GmbH, Vahrewalder Str 7, D-30165 Hannover, Germany.

EM ufuk.gokce@eos-energy-solutions.de; umut.gokce@eos-energy-solutions.de

CR Abdullah A, 2009, COMPUT ELECTRON AGR, V69, P59, DOI 10.1016/j.compag.2009.07.003

Asim M., 2008, P INT WIR COMM MOB C

Augenbroe G, 2005, BUILD RES INF, V33, P159, DOI 10.1080/0961321042000325327

Autodesk, 2012, REV ARCH

BuildingEQ, 2012, BUILDINGEQ PROJ

Caldas R. B., 2005, P INT EM TECHN FACT

CHEN SZ, 2012, J PROCEDIA ENG, V29, P1994, DOI DOI 10.1016/J.PROENG.2012.01.250

CIBSE, 2004, GUID F EN EFF BUILD

Cylon, 2012, CYL CONTR SMART EN C

DIN-German Institute of Standards, 2007, 15232 DIN EN  
 DOE, 2008, BUILD EN DAT BOOK  
 Eastman, 2008, BIM HDB GUIDE BUILDI  
 EC - European Commission, 2007, NEW EU EN PLAN MOR S  
 EC, 2010, EN EFF BUILD PPP PUB  
 EC, 2009, EUR UN EN TRENDS 203  
 EC - European Commission, 2009, ENV CLIM CHANG EM TR  
 EC, 2012, EUR COMM RES INN IND  
 Elmasri R, 2004, FUNDAMENTALS DATABAS  
 EnOcean, 2012, EN WIR SYST  
 Erl T., 2005, SERVICE ORIENTED ARC  
 Eurostat, 2008, EUR COMM EUR SEARCH  
 Miguel S., 2012, J COMPUTER NETWORKS, V56, P1303  
 Fischer M., 2008, P 7 INT C MOB BUS  
 Gokce H. U., 2011, P 11 INT C CONSTR AP  
 Gokce H. U., 2009, P CIB W78 26 INT C M  
 Gokce H. U., 2012, P 11 INT C SUST EN T  
 Gokce H.U., 2010, THESIS  
 Gokce H. U., 2012, P 14 INT C COMP CIV  
 Gokce K. U., 2012, P 14 INT C COMP CIV  
 Hesmos, 2012, ICT PLATF HOL EN EFF  
 \*IEA, 2008, CO2 EM FUEL COMB  
 Inmon W. H., 2005, BUILDING DATA WAREHO  
 Itard L., 2008, BUILDING RENOVATION  
 Jagemar L., 2007, PROJECT REPORT  
 Jang WS, 2008, AUTOMAT CONSTR, V17, P729, DOI 10.1016/j.autcon.2008.02.001  
 Kabitzsch K., 2006, ANAL REMOTE ACCESS A, V48  
 Karavan A., 2008, P FET2005 6 IFAC INT  
 Keller M., 2008, TSINGHUA SCI TECHNOL, V13, P1  
 Kimball R, 2008, DATA WAREHOUSE LIFEC  
 Klues K., 2007, P 21 ACM SIGOPS S OP, P251  
 LBNL (Lawrence Berkley National Laboratory), 2006, LBNL56144  
 Liu Jingyu, 2006, P IEEE INT C INF ACQ  
 Malatras A, 2008, J FACIL MANAG, V6, P132, DOI 10.1108/14725960810872659  
 Diamond R., 2011, LBNL4283E  
 Marinilli M., 2006, PROFESSIONAL JAVA US  
 Mensah K., 2005, ORACLE DATABASE PROG  
 Nikolaus K., 2008, PICTURES FUTURE SPRI  
 Piette M. A., 2005, DEV EVALUATION FULLY  
 Ramanathan N., 2005, 2 IEEE WORKSH EMB NE  
 Rowe A., 2010, IBM J RES DEV, V55  
 Schmidt F., 2008, 4 WORKSH EN EFF TECH  
 Shangwei D., 2006, WIR OPT COMM NETW 20  
 Stackowiak, 2007, ORACLE DATA WAREHOUS  
 Tso GKF, 2007, ENERGY, V32, P1761, DOI 10.1016/j.energy.2006.11.010  
 VDMA-German Engineering Federation, 2008, EN EFF BUILD  
 Wang SW, 2007, AUTOMAT CONSTR, V16, P112, DOI 10.1016/j.autcon.2006.03.004  
 Wenjie C., 2005, P INT C PAR PROC WOR  
 Yaqing L., 2008, P INT C COMP COMM CO  
 Yarvis M., 2005, P IEEE INT C COMP CO  
 Zhang P., 2008, P 12 INT C COMP SUPP  
 Zhao Z, 2005, P IEEE ENG MED BIOL

NR 61

TC 9

Z9 9

U1 1

U2 8

PU ELSEVIER SCIENCE BV

PI AMSTERDAM  
 PA PO BOX 211, 1000 AE AMSTERDAM, NETHERLANDS  
 SN 2210-6715  
 J9 SUSTAIN CITIES SOC  
 JI Sust. Cities Soc.  
 PD FEB  
 PY 2014  
 VL 10  
 BP 161  
 EP 173  
 DI 10.1016/j.scs.2013.08.004  
 PG 13  
 WC Construction & Building Technology; GREEN & SUSTAINABLE SCIENCE &  
 TECHNOLOGY; Energy & Fuels  
 SC Construction & Building Technology; Science & Technology - Other Topics;  
 Energy & Fuels  
 GA V41OC  
 UT WOS:000209554500017  
 DA 2018-05-03  
 ER

PT J  
 AU Ultra, C  
 Boso, A  
 Espluga, J  
 Prades, A  
 AF Ultra, Christian  
 Boso, Alex  
 Espluga, Josep  
 Prades, Ana

TI A qualitative study of users' engagement with real-time feedback from  
 in-house energy consumption displays

SO ENERGY POLICY

LA English

DT Article

DE Real-time feedback; Qualitative study; Energy attitudes and behaviors

ID BEHAVIOR

AB Recent developments in feedback technologies and smart meters have advanced the introduction of energy consumption displays in the home. This could facilitate a significant amount of energy saving for the maximum number of homeowners. But empirical studies show that achieved savings in electricity consumption from in-house displays range approximately from 0 to 20%. In order to qualitatively explore the factors underlying such variation in the achieved saving, this paper studies how a small sample of householders interacted with the feedback from an energy consumption display. Following a heuristic model based on prior energy-related behavioral research, we explore the effects of the in-home display on household electricity. Results indicate that saving might be moderated by the level of users engagement with the display, preceded by user's motivation to save energy, prior attitudes and, importantly, the level of involvement generated by the intervention. (C) 2013 Elsevier Ltd. All rights reserved.

C1 [Ultra, Christian; Prades, Ana] CISOT, CIEMAT, Sociotech Res Ctr, Barcelona, Spain.

[Boso, Alex] Pompeu Fabra Univ, Dept Polit & Social Sci, Barcelona, Spain.

[Espluga, Josep] Univ Autònoma Barcelona, Dept Sociol, E-08193 Barcelona, Spain.

RP Ultra, C (reprint author), CISOT, CIEMAT, Sociotech Res Ctr, Gran Via Carls Catalanes 604, Barcelona, Spain.

EM Christian.oltra@ciemat.es; alex.boso@upf.edu;  
 josepluis.espluga@uab.cat; ana.prades@ciemat.es

OI Espluga, Josep/0000-0002-5058-2411

FU FP7 PACHELBEL Project (Policy Addressing Climate Change & Learning about  
 Consumer Behaviour and Everyday Life) [FP7/2008-1]

FX This research work was supported by the FP7 PACHELBEL Project (Policy

Addressing Climate Change & Learning about Consumer Behaviour and Everyday Life) (FP7/2008-1) (<http://www.pachelbel.eu/>). PACHELBEL was aimed at developing and trialing a method (STAVE: Systematic Tool for Behavioral Assumption Validation and Exploration) to aid in the design of public policies on sustainability by improving knowledge brokerage processes. Our gratitude and sincere thanks to Prof. Tom Horlick-Jones at Cardiff University for his dedication and commitment over the years. Thanks to Gerard Pol and Irma Soldevilla at the Agencia d'Energia de Barcelona as well as all colleagues who collaborated in Pachelbel. Thanks also to participants in the study for making this research possible.

- CR Anderson W., 2009, EXPLORING CONSUMER P  
 Anderson W., 2009, SMART WAY DISPLAY  
 Burgess J, 2008, ENER POLICY, V36, P4454, DOI 10.1016/j.enpol.2008.09.039  
 CNT Energy at the Center for Neighborhood Technology, 2008, DEM PRIC LIGHT TECHN  
 Darby S, 2006, EFFECTIVENESS FEEDBA  
 DeYoung R, 1996, ENVIRON BEHAV, V28, P358, DOI 10.1177/0013916596283005  
 Ehrhardt-Martinez K., 2010, ADV METERING INITIAT  
 Faruqui A, 2010, ENERGY, V35, P1598, DOI 10.1016/j.energy.2009.07.042  
 Fischer C, 2008, ENER EFFIC, V1, P79, DOI 10.1007/s12053-008-9009-7  
 Fisher J., 2010, P C IESD PHD C EN SU  
 FOSTER B, 2012, RESULTS RECENT REAL  
 Froehlich J., 2009, HCIC 2009 WORKSH  
 Gardner G. T., 2002, ENV PROBLEMS HUMAN B  
 Hargreaves T., 2012, ENERGY POLICY  
 Hargreaves T, 2010, ENER POLICY, V38, P6111, DOI 10.1016/j.enpol.2010.05.068  
 Horlick-Jones T, 2008, J RISK RES, V11, P697, DOI 10.1080/13669870701875693  
 Horlick-Jones T, 2007, RISK AND THE PUBLIC ACCEPTANCE OF NEW TECHNOLOGIES, P41  
 Horlick-Jones T., 2010, PUBLIC UNDERST SCI, V1, P1  
 Karbo P., 2005, P 2005 SUMM STUD EUR, P161  
 Kidd A., 2008, TALYBONT TRIAL EXPLO  
 MIDDEN CJH, 1983, J ECON PSYCHOL, V3, P65, DOI 10.1016/0167-4870(83)90058-2  
 Rosenhead J., 2001, RATIONAL ANAL PROBLE  
 Schultz PW, 2007, PSYCHOL SCI, V18, P429, DOI 10.1111/j.1467-9280.2007.01917.x  
 Staats H, 2004, ENVIRON BEHAV, V36, P341, DOI 10.1177/0013916503260163  
 Stern PC, 2000, J SOC ISSUES, V56, P407, DOI 10.1111/0022-4537.00175  
 STERN PC, 1986, EVALUATION REV, V10, P147, DOI 10.1177/0193841X8601000201  
 Wilson C, 2007, ANNU REV ENV RESOUR, V32, P169, DOI 10.1146/annurev.energy.32.053006.141137  
 Wood G, 2003, ENER BUILDINGS, V35, P821, DOI 10.1016/S0378-7788(02)00241-4
- NR 28  
 TC 9  
 Z9 10  
 U1 3  
 U2 19  
 PU ELSEVIER SCI LTD  
 PI OXFORD  
 PA THE BOULEVARD, LANGFORD LANE, KIDLINGTON, OXFORD OX5 1GB, OXON, ENGLAND  
 SN 0301-4215  
 EI 1873-6777  
 J9 ENER POLICY  
 JI Energy Policy  
 PD OCT  
 PY 2013  
 VL 61  
 BP 788  
 EP 792  
 DI 10.1016/j.enpol.2013.06.127  
 PG 5

WC Economics; Energy & Fuels; Environmental Sciences; Environmental Studies  
 SC Business & Economics; Energy & Fuels; Environmental Sciences & Ecology  
 GA 231UI  
 UT WOS:000325443500079  
 DA 2018-05-03  
 ER

PT J

AU Noonan, DS

Hsieh, LHC

Matisoff, D

AF Noonan, Douglas S.

Hsieh, Lin-Han Chiang

Matisoff, Daniel

TI Spatial Effects in Energy-Efficient Residential HVAC Technology Adoption

SO ENVIRONMENT AND BEHAVIOR

LA English

DT Article

DE HVAC; energy efficiency; adoption behavior; spatial dependence

ID NETWORK EXTERNALITIES; DIFFUSION; CONSERVATION; SECTOR

AB If your neighborhood adopts greener, energy-efficient residential heating, ventilating, and air conditioning (HVAC) systems, will your proenvironmental behavior become contagious, spilling over into adjacent neighborhoods' HVAC adoptions? Objective data on more than 300,000 detailed single-family house sale records in the Greater Chicago area from 1992 to 2004 are aggregated to census block-group neighborhoods to answer that question. Spatial lag regression models show that spatial dependence or "contagion" exists for neighborhood adoption of energy-efficient HVACs. Specifically, if 625 of 726 homes in a demonstration neighborhood upgraded to green HVAC, data of this study predict that at least 98 upgrades would occur in adjacent neighborhoods, more than doubling their baseline adoption rates. This spatial multiplier substantially magnifies the effects of factors affecting adoption rates. These results have important policy implications, especially in the context of new standards for neighborhood development, such as Leadership in Energy and Environmental Design (LEED) or Low-Impact Development standards.

C1 [Noonan, Douglas S.; Matisoff, Daniel] Georgia Inst Technol, Sch Publ Policy, Atlanta, GA 30332 USA.

[Hsieh, Lin-Han Chiang] Georgia Inst Technol, Atlanta, GA 30332 USA.

RP Noonan, DS (reprint author), Georgia Inst Technol, Sch Publ Policy, Atlanta, GA 30332 USA.

EM Douglas.Noonan@pubpolicy.gatech.edu

CR Abrahamse W, 2005, J ENVIRON PSYCHOL, V25, P273, DOI 10.1016/j.jenvp.2005.08.002

Anselin L, 2003, INT REGIONAL SCI REV, V26, P147, DOI 10.1177/0160017602250971

Anselin L, 2001, AM J AGR ECON, V83, P705, DOI 10.1111/0002-9092.00194

Anselin L, 2000, SPATIAL ECONOMETRICS

Ardehali MM, 1996, ENERG CONVERS MANAGE, V37, P1469, DOI 10.1016/0196-8904(95)00219-7

ARROW KJ, 1962, REV ECON STUD, V29, P155, DOI 10.2307/2295952

Baerenklau KA, 2005, LAND ECON, V81, P1

Bandiera O, 2006, ECON J, V116, P869, DOI 10.1111/j.1468-0297.2006.01115.x

Chandler S., 2009, 51 SCH PUBL POL GEOR

FOSTER AD, 1995, J POLIT ECON, V103, P1176, DOI 10.1086/601447

Fragkias M, 2007, ENVIRON PLANN B, V34, P858, DOI 10.1068/b32132

Goolsbee A, 2002, J LAW ECON, V45, P317, DOI 10.1086/344399

Gowrisankaran G, 2004, RAND J ECON, V35, P260, DOI 10.2307/1593691

Hekkert MP, 2007, TECHNOL FORECAST SOC, V74, P413, DOI 10.1016/j.techfore.2006.03.002

Ioannides YM, 2003, J APPL ECONOM, V18, P563, DOI 10.1002/jae.740

Jaber JO, 2005, ENERG POLICY, V33, P1329, DOI 10.1016/j.enpol.2003.12.009

Kim CW, 2003, J ENVIRON ECON MANAG, V45, P24

Kok N, 2011, AM ECON REV, V101, P77, DOI 10.1257/aer.101.3.77

Krause R., 2009, SEARCH WIS EN POL C

Kuhn I, 2006, NEW PHYTOL, V172, P127, DOI 10.1111/j.1469-8137.2006.01811.x

Lawrence TM, 2005, ASHRAE J, V47, pS40

Longley PA, 2004, ANN ASSOC AM GEOGR, V94, P503, DOI 10.1111/j.1467-8306.2004.00411.x

Menanteau P, 2000, RES POLICY, V29, P375, DOI 10.1016/S0048-7333(99)00038-4

Mills BF, 2010, RESOUR ENERGY ECON, V32, P363, DOI 10.1016/j.reseneeco.2009.10.002  
 Mlecnik E, 2010, OPEN HOUSE INT, V35, P39  
 Nair G, 2010, ENER POLICY, V38, P2956, DOI 10.1016/j.enpol.2010.01.033  
 Niemeyer S, 2010, INT J CONSUM STUD, V34, P140, DOI 10.1111/j.1470-6431.2009.00841.x  
 Osbaldiston R, 2012, ENVIRON BEHAV, V44, P257, DOI 10.1177/0013916511402673  
 Oster E, 2009, 14828 NBER  
 Rogers EM, 1995, DIFFUSION INNOVATION  
 Schot J, 2008, TECHNOL ANAL STRATEG, V20, P537, DOI 10.1080/09537320802292651  
 Sovacool BK, 2009, TECHNOL SOC, V31, P365, DOI 10.1016/j.techsoc.2009.10.009  
 Stern PC, 2011, AM PSYCHOL, V66, P303, DOI 10.1037/a0023235  
 Tse R. Y. C., 1999, REV URBAN REGIONAL D, V11, P114  
 US Department of Housing and Urban Development, 2003, PRACT LOW IMP DEV  
 United States Department of Energy, 2009, 2009 BUILD EN DAT BO  
 U. S. Green Building Council, 2010, LEAD EN ENV DES LEED

NR 37

TC 9

Z9 9

U1 0

U2 16

PU SAGE PUBLICATIONS INC

PI THOUSAND OAKS

PA 2455 TELLER RD, THOUSAND OAKS, CA 91320 USA

SN 0013-9165

J9 ENVIRON BEHAV

J1 Environ. Behav.

PD MAY

PY 2013

VL 45

IS 4

BP 476

EP 503

DI 10.1177/0013916511421664

PG 28

WC Environmental Studies; Psychology, Multidisciplinary

SC Environmental Sciences & Ecology; Psychology

GA 138YI

UT WOS:000318547400003

DA 2018-05-03

ER

PT J

AU Guta, DD

AF Guta, Dawit Diriba

TI Application of an almost ideal demand system (AIDS) to Ethiopian rural residential energy use: Panel data evidence

SO ENERGY POLICY

LA English

DT Article

DE Fuel choice; Residential energy use; Almost ideal demand system

ID HOUSEHOLD MODEL; INDIA; CONSUMPTION; COOKING; CHINA

AB It is well known that poor rural households in low-income economies are reliant on traditional fuels to meet basic domestic energy needs, but little is known about the specific underlying socio-economic drivers of residential fuel choices in Ethiopia. I used the linear approximation almost ideal demand system (LAAIDS) with normalized prices to compute expenditure elasticity and a multinomial logit model (MLM) to examine household fuel use. The LAAIDS model result showed that expenditure was elastic for modern fuels, but inelastic for traditional fuels. Regression results from the MLM indicated that fuel choice behaviour of rural households could be more accurately described as 'fuel stacking' behaviour as opposed to the 'energy ladder' hypothesis. In rural areas household fuel choice may be constrained by limited access



to commercial fuels and efficient cook stoves, supply dependency and affordability, consumer preferences and a web of other intricate factors. Rural households had less incentive for fuel switching due to underlying factors and the availability of fuel wood without direct financial cost. With continued deforestation and receding forests, households are expected to develop inter fuel substitution and switching behaviour conditional on access to modern energy technologies. (C) 2012 Elsevier Ltd. All rights reserved.

C1 Univ Bonn, Dept Econ & Technol Change, Ctr Dev Res ZEF, D-53113 Bonn, Germany.

RP Guta, DD (reprint author), Univ Bonn, Dept Econ & Technol Change, Ctr Dev Res ZEF, Walter Flex Str 3, D-53113 Bonn, Germany.

EM davdiriba@yahoo.com

CR Abebaw E.D., 2007, J DEV AREAS, V41, P117

Adhikari B, 2004, ECOL ECON, V48, P245, DOI 10.1016/j.ecolecon.2003.08.008

ARNOLD M, 2006, WORLD DEV, V34, P596

Baland J.M., 2007, ENV IMPACT POVERTY E

Barnes D. F., 2005, URBAN HOUSEHOLD ENER

Bereket K., 2002, ENER POLICY, V30, P1029

Campbell B., 2003, ENERGY TRANSITION AC

Chambwera M., 2004, EC ANAL URBAN FUEL W

Chaudhuri S., 2004, FUEL CHOICE INDOOR A

Chen L, 2006, ECOL ECON, V58, P407, DOI 10.1016/j.ecolecon.2005.07.018

DEATON A, 1980, AM ECON REV, V70, P312

Demurger S, 2011, CHINA ECON REV, V22, P512, DOI 10.1016/j.chieco.2010.09.009

Energy Sector Management Assistant Program (ESMAP), 2003, HOUS FUEL US FUEL SW

Farsi M, 2007, ENVIRON DEV ECON, V12, P757, DOI 10.1017/S1355770X07003932

Faye S., 2002, 304 WORLD BANK

Foster A., 2003, Q J ECON, V118, P301

Heltberg R, 2000, LAND ECON, V76, P213, DOI 10.2307/3147225

Heltberg R, 2005, ENVIRON DEV ECON, V10, P337, DOI 10.1017/S1355770X04001858

\*IEA, 2005, WORLD EN OUTL

JACK D, 2004, INCOME HOUSEHOLD ENE

Jargstorf B., 2004, RENEWABLE ENERGY DEV

Macht C., 2007, 07629 U MICH I SOC S

Masera OR, 2000, WORLD DEV, V28, P2083, DOI 10.1016/S0305-750X(00)00076-0

Mekonnen A., 1999, Journal of Forest Economics, V5, P69

Mekonnen A., 2009, ENV DEV DISCUSSION P

Ouedraogo B, 2006, ENER POLICY, V34, P3787, DOI 10.1016/j.enpol.2005.09.006

Pachauri S, 2008, ENER POLICY, V36, P4022, DOI 10.1016/j.enpol.2008.06.016

Reddy BS, 2003, ENER POLICY, V31, P1117, DOI 10.1016/S0301-4215(02)00220-3

Train K. E., 2003, DISCRETE CHOICE METH

NR 29

TC 9

Z9 9

U1 0

U2 26

PU ELSEVIER SCI LTD

PI OXFORD

PA THE BOULEVARD, LANGFORD LANE, KIDLINGTON, OXFORD OX5 1GB, OXON, ENGLAND

SN 0301-4215

J9 ENER POLICY

JI Energy Policy

PD NOV

PY 2012

VL 50

BP 528

EP 539

DI 10.1016/j.enpol.2012.07.055

PG 12

WC Economics; Energy & Fuels; Environmental Sciences; Environmental Studies

SC Business & Economics; Energy & Fuels; Environmental Sciences & Ecology  
GA 028EO  
UT WOS:000310405800050  
DA 2018-05-03  
ER

PT 5

AU Xie, Y

Mao, Z

AF Xie, Yan

Mao, Zhe

BE Guo, H

TI Evaluation of Residential Energy-Saving Buildings Based on Grey  
Relational Analysis Method

SO 2012 INTERNATIONAL WORKSHOP ON INFORMATION AND ELECTRONICS ENGINEERING

SE Procedia Engineering

LA English

DT Proceedings Paper

CT International Workshop on Information and Electronics Engineering  
(IWIEE) / International Conference on Information, Computing and  
Telecommunications (ICICT)

CY MAR 10-11, 2012

CL Harbin, PEOPLES R CHINA

SP Harbin Univ Sci & Technol, Int Sci & Engr Res Ctr, Harbin Engr Univ, NE Forestry Univ, Harbin Normal  
Univ, HeiLongJing Univ, NE Petr Univ, Harbin Univ, China Commun Magazine, Co., Ltd

DE Energy-saving building; Design selection; Grey relational analysis;  
Evaluation

AB Energy-saving design is the key factor for buildings, and there is no unified approach that can effectively assess the energy efficiency of residential design. On the basis of the characteristics of complexity and the uncertainty of optimal selection for energy-saving building designs, grey relational analysis model in energy-saving buildings multi-designs selection application has been put forward in this paper. The index system of influencing energy-saving buildings design selection is determined. Application model and procedures of the grey relational analysis method are introduced. According to the degree how close it is with the ideal dot, the optimal design is easy to be selected out. Through the optimization analysis design selection for energy-saving building designs, it is proved that the optimal design selection for energy-saving buildings based on grey relational analysis has the strong recognition judgment ability. It is convenient, quantitative, and strict. It provided a possible new way for evaluation of energy-saving building design selecting. (C) 2011 Published by Elsevier Ltd. Selection and/or peer-review under responsibility of Harbin University of Science and Technology.

C1 [Xie, Yan; Mao, Zhe] Wuhan Polytech Univ, Wuhan 430023, Peoples R China.

RP Xie, Y (reprint author), Wuhan Polytech Univ, 68 South Univ, Wuhan 430023, Peoples R China.

EM limimimm@163.com

CR Deng J. L., 1990, GRAY SYSTEM THEORY C

Yan Xie, 2011, 2011 INT C REC TREND, V55-57, P988

Zhang Mingdi, 1995, J GREY SYSTEM PAPERS, V21, P14

TIAN Qing-chang, 2008, RESOURCE DEV MARKET, V24, P876

NR 4

TC 9

Z9 9

U1 0

U2 6

PU ELSEVIER SCIENCE BV

PI AMSTERDAM

PA SARA BURGERHARTSTRAAT 25, PO BOX 211, 1000 AE AMSTERDAM, NETHERLANDS

SN 1877-7058

J9 PROCEDIA ENGINEER

PY 2012

VL 29

BP 3149  
 EP 3153  
 DI 10.1016/j.proeng.2012.01.456  
 PG 5  
 WC Engineering, Mechanical  
 SC Engineering  
 GA BDP99  
 UT WOS:000314346403035  
 OA gold  
 DA 2018-05-03  
 ER

PT J

AU Ashina, S

Nakata, T

AF Ashina, Shuichi

Nakata, Toshihiko

TI Quantitative analysis of energy-efficiency strategy on CO<sub>2</sub> emissions in the residential sector in Japan - Case study of Iwate prefecture

SO APPLIED ENERGY

LA English

DT Article

DE energy efficiency; rural energy policy; residential sector

ID COGENERATION PLANTS; MANAGEMENT; SYSTEMS; DEMAND; DESIGN; TECHNOLOGIES; CONSERVATION; CONVERSION; MODEL

AB This study examines the economics of energy-efficiency strategies for reducing CO<sub>2</sub> emissions in the residential sector in Japan from the perspective of regional characteristics. For this study, the residential sector in Iwate prefecture was selected as representative of rural areas in Japan. In order to promote purchases of energy-efficient consumer appliances, the prefectural government is presumed to reimburse purchasers a part of the cost difference between energy efficient and conventional appliances. This paper begins with a discussion of the prefecture's financial support for purchasers of energy efficient appliances and assumes that the payments come from prefectural government funds. This paper then looks at the effect of a carbon-tax refund on the reduction of CO<sub>2</sub> emissions. The results show that, if half of the households use energy-efficient appliances, then CO<sub>2</sub> emissions in the residential sector in the year 2020 will decrease from the BAU scenario, 0.726 Mt-C to 0.674 Mt-C. However, the Iwate prefectural government expends \$105 million annually, which is 1.5% of the total tax revenue in the year 2003. The carbon-tax refund effectively encourages further reductions in CO<sub>2</sub> emissions. Under the \$20/tC carbon tax, proposed by the Ministry of the Environment, the carbon-tax refund leads to a reduction in residential CO<sub>2</sub> emissions from 0.726 Mt-C to 0.712 Mt-C. (C) 2007 Elsevier Ltd. All rights reserved.

C1 [Nakata, Toshihiko] Tohoku Univ, Grad Sch Engr, Management Sci & Technol Dept, Sendai, Miyagi 9808579, Japan.

[Ashina, Shuichi] Natl Inst Environm Studies, Ctr Global Environm Res, Climate Policy Assessment Res Sect, Tsukuba, Ibaraki 3508506, Japan.

RP Nakata, T (reprint author), Tohoku Univ, Grad Sch Engr, Management Sci & Technol Dept, Aoba Yama 6-6-11-815, Sendai, Miyagi 9808579, Japan.

EM nakata@cc.mech.tohoku.ac.jp

RI Nakata, Toshihiko/E-3161-2010

OI Nakata, Toshihiko/0000-0003-0088-9498

CR Ahadi-Oskui T, 2006, ENERGY, V31, P1346, DOI 10.1016/j.energy.2005.05.016

Barr S, 2005, ENER POLICY, V33, P1425, DOI 10.1016/j.enpol.2003.12.016

Berta GL, 2006, ENERGY, V31, P1403, DOI 10.1016/j.energy.2005.05.022

BOYD DW, 1982, MANAGE SCI, V28, P418, DOI 10.1287/mnsc.28.4.418

Bruckner T, 2005, ECOL ECON, V54, P328, DOI 10.1016/j.ecolecon.2004.12.032

Dulleck U, 2004, ENER POLICY, V32, P1025, DOI 10.1016/S0301-4215(03)00060-0

\*EN CONS CTR, 2005, HDB EN EC STAT JAP

\*EN CONS CTR, 2005, TOP RUNN PROGR

Ghosh S, 2006, ENERGY, V31, P345, DOI 10.1016/j.energy.2005.01.011

\*GLOB WARM PREV HE, GUID MEAS PREV GLOB

Hernandez-Santoyo J, 2003, APPL ENERG, V76, P219, DOI 10.1016/S0306-2619(03)00061-8  
Hunt LC, 2003, ENERGY J, V24, P63  
\*IW PREF GOVT, 2005, STAT REP IW PREF  
\*IW PREF GOVT, 2004, STAT REP IW PREFECTU  
\*IW PREF GOVT, 2002, REP BAS SURV PLANN N  
\*IW PREF GOVT, 2002, ACT PLAN RES PREV GL  
\*JAP MIN ENV, 2005, IMPL CARB TAX JAP  
\*JAP STAT BUR, 2005, JAP STAT YB  
\*JYUK RES I, 1999, EN HDB RES SECT  
Kawamoto K, 2004, ENERGBUILDINGS, V36, P915, DOI 10.1016/j.enbuild.2004.02.004  
KUDO H, 2004, COMMUNICATION  
Lamont A.D., 1997, USERS GUIDE META NET  
MARBE A, 2006, PLANT ENERGY, V31, P1614  
Marquez AC, 2005, RELIAB ENG SYST SAFE, V88, P273, DOI 10.1016/j.ress.2004.07.018  
\*MIN EC TRAD IND, 2003, ABSTR EL POW SUPPL D  
\*MIN ENV, 2001, ACT TECHN RED CO2 EM  
\*MIN ENV, 2004, SURV ENV TAX SYST OT  
\*MIN ENV, 2004, DEF PLAN CARB TAX  
Mulder P, 2003, RESOUR ENERGY ECON, V25, P105, DOI 10.1016/S0928-7655(02)00019-2  
Nagata Y, 2005, ENERGY, V30, P2636, DOI 10.1016/j.energy.2004.07.009  
NAGATA Y, 2000, COMMUNICATION 0621  
Nakata T, 2003, J CLEAN PROD, V11, P389, DOI 10.1016/S0959-6526(02)00061-6  
NAKATA T, 2004, PROG ENERGBUILDINGS, V37, P443, DOI 10.1016/j.enbuild.2004.08.006  
Pan CS, 2005, ENERGBUILDINGS, V37, P443, DOI 10.1016/j.enbuild.2004.08.006  
Rankin R, 2004, ENERGBUILDINGS, V37, P443, DOI 10.1016/j.enconman.2003.08.020  
SAINI S, 2004, REFOCUS MAY, P52  
Smulders S, 2003, RESOUR ENERGY ECON, V25, P59, DOI 10.1016/S0928-7655(02)00017-9  
UCHIYAMA Y, 1990, Y90015 CENTR RES I P  
Wall G, 2002, ENERGBUILDINGS, V37, P443, DOI 10.1016/S0196-8904(02)00010-9

NR 39

TC 9

Z9 9

U1 0

U2 6

PU ELSEVIER SCI LTD

PI OXFORD

PA THE BOULEVARD, LANGFORD LANE, KIDLINGTON, OXFORD OX5 1GB, OXON, ENGLAND

SN 0306-2619

J9 APPL ENERG

J1 Appl. Energy

PD APR

PY 2008

VL 85

IS 4

BP 204

EP 217

DI 10.1016/j.apenergy.2007.07.012

PG 14

WC Energy & Fuels; Engineering, Chemical

SC Energy & Fuels; Engineering

GA 260OV

UT WOS:000253020500004

DA 2018-05-03

ER

PT J

AU Tyler, SR

AF Tyler, SR

TI Household energy use in Asian cities: Responding to development success

SO ATMOSPHERIC ENVIRONMENT

LA English

DT Article

DE household; cooking fuels; electricity; developing countries;  
urbanization

ID ELECTRICITY

AB In the past 10-15 years, gains in household income and urban development in many countries in Asia have led to significant shifts in household use of fuels away from traditional, biomass-based household fuels to modern, fossil fuels. These results suggest that, while the global atmospheric emissions implications need further analysis, the local air quality effects of urban household fuel use changes have been positive. These changes also demonstrate improvements in living conditions, particularly for poor women and children most affected by indoor air quality. However, for electricity use, where there is evidence of dramatic increases in household consumption, the longer term implications for atmospheric emissions are more troubling. Rapid demand growth in the urban household sector is contributing to huge increases in thermal electric generating capacity needs in Asia. Improving technologies of electricity use in the household sector appears to be easily achievable and could be stimulated through market and policy mechanisms which have been used elsewhere. These measures offer the prospect of real environmental and economic gains without sacrificing lifestyle advantages of electrical appliance use in households.

RP Tyler, SR (reprint author), INT DEV RES CTR, 7TH FLOOR RELC BLDG, 30 ORANGE GROVE RD, SINGAPORE 1025, SINGAPORE.

CR ANG BW, 1992, ENERGY, V17, P37, DOI 10.1016/0360-5442(92)90031-T

DAXIONG Q, 1994, ENERGY, V19, P529

GARCIA RA, 1994, ENERGY, V19, P539, DOI 10.1016/0360-5442(94)90050-7

GELLER H, 1990, ELECTRICITY CONSERVA

HILLS P, 1994, ENERGY, V19, P517, DOI 10.1016/0360-5442(94)90048-5

KULKARNI A, 1994, ENERGY, V19, P549, DOI 10.1016/0360-5442(94)90051-5

LEACH GA, 1988, ANNU REV ENERGY, V13, P47

MEYERS S, 1993, ENER POLICY, V21, P1123, DOI 10.1016/0301-4215(93)90262-E

PONGSAPICH A, 1994, ENERGY, V19, P509, DOI 10.1016/0360-5442(94)90047-7

SATHAYE J, 1991, ANNU REV ENER ENV, V16, P295

SCHIPPER L, 1991, ENER POLICY, V19, P244, DOI 10.1016/0301-4215(91)90150-M

SCHIPPER L, 1992, IMPROVING APPLIANCE

SCHIPPER L, 1992, ENERGY POLICY

SMITH KR, 1994, ENERGY, V19, P587, DOI 10.1016/0360-5442(94)90054-X

TYLER S, 1992, THESIS U CALIFORNIA

NR 15

TC 9

Z9 10

U1 0

U2 7

PU PERGAMON-ELSEVIER SCIENCE LTD

PI OXFORD

PA THE BOULEVARD, LANGFORD LANE, KIDLINGTON, OXFORD, ENGLAND OX5 1GB

SN 1352-2310

J9 ATMOS ENVIRON

JI Atmos. Environ.

PD MAR

PY 1996

VL 30

IS 5

BP 809

EP 816

DI 10.1016/1352-2310(94)00353-X

PG 8

WC Environmental Sciences; Meteorology & Atmospheric Sciences

SC Environmental Sciences & Ecology; Meteorology & Atmospheric Sciences

GA TP451

UT WOS:A1996TP45100016

DA 2018-05-03

ER

PT J

AU GARCIA, RA

MANEGDEG, F

RANESES, NO

AF GARCIA, RA

MANEGDEG, F

RANESES, NO

TI HOUSEHOLD ENERGY-CONSUMPTION SURVEYS IN 3 PHILIPPINE CITIES

SO ENERGY

LA English

DT Article

AB We present findings of a household energy-consumption survey conducted between September 1989 and June 1990 in three urban areas chosen to encompass wide variations in population size, levels of industrialization, climate conditions, and cultural practices. Nine hundred households were surveyed (300 in each of the cities) with respect to patterns of fuel use, fuel expenses, physico-socio-economic and environmental characteristics, and levels of appliance ownership. We found that household energy-consumption in these three Philippine cities is dominated by modern fuels, although traditional fuels still contribute a significant portion of total household-energy use. The shift toward more efficient, modern fuels has occurred gradually alongside expanding urbanization and household incomes. High costs inhibit a speedier transition to more efficient fuels and appliances. Analysis of past and current trends suggests that energy use in urban households in the Philippines will most likely rise over the next decade in light of expected population increases, economic growth and the global trend towards acquisition of more and larger appliances.

RP GARCIA, RA (reprint author), UNIV PHILIPPINES, COLL ENGN, ENERGY & ENVIRONM ENGN SYST & POLICY ANAL RES GRP, QUEZON, PHILIPPINES.

CR 1985, PHILIPPINE NATIONAL

NR 1

TC 9

Z9 9

U1 0

U2 1

PU PERGAMON-ELSEVIER SCIENCE LTD

PI OXFORD

PA THE BOULEVARD, LANGFORD LANE, KIDLINGTON, OXFORD, ENGLAND OX5 1GB

SN 0360-5442

J9 ENERGY

JJ Energy

PD MAY

PY 1994

VL 19

IS 5

BP 539

EP 548

DI 10.1016/0360-5442(94)90050-7

PG 10

WC Thermodynamics; Energy & Fuels

SC Thermodynamics; Energy & Fuels

GA NJ769

UT WOS:A1994NJ76900006

DA 2018-05-03

ER

FN Clarivate Analytics Web of Science

VR 1.0

PT J

AU Ma, MD

Yan, R

Du, YJ

Ma, XR

Cai, WG

Xu, PP

AF Ma, Minda

Yan, Ran

Du, Yongjie

Ma, Xianrui

Cai, Weiguang

Xu, Pengpeng

TI A methodology to assess China's building energy savings at the national level: An IPAT-LMDI model approach

SO JOURNAL OF CLEANER PRODUCTION

LA English

DT Article

DE National building energy savings (NBES); National building energy consumption (NBEC); China's existing buildings; Building energy-efficiency (BEE) policy; IPAT model; LMDI decomposition

ID CO2 EMISSION; LONG-TERM; DECOMPOSITION; CONSUMPTION; REDUCTION; MITIGATION; INDUSTRY; GROWTH

AB National building energy savings (NBES) plays an essential role in policymaking of China's building energy-efficiency (BEE) work. Numerous factors, such as technological progress and users' behavior, affect NBES while most of them are unquantifiable. One missing possibility along this direction is that there is currently no method to calculate China's NBES by summarizing all driving factors. To arrive at a solution, we proposed a concept of comparable building energy consumption per unit area and a method of China's NBES calculation based on an extended version of IPAT model (I = PAT, I = Human Impact, P = Population, A = Affluence, T = Technology) and LMDI decomposition (Logarithmic Mean Divisia Index, LMDI). Calculation revealed that China's NBES in "The 10th Five Year Plan" period (2001-2005), "The 11th Five Year Plan" period (2006-2010), and the first four years of "The 12th Five Year Plan" period (2011-2014) was 165, 158, and 127 million tce, respectively. Based on these calculation results, we checked NBES data then successfully proved the validity of this calculation method. Furthermore, after comparing the calculated NBES with the official planned NBES, we found that China surpassed its BEE targets. In the third stage of China's BEE work (2006-2015), the implementation of BEE policies obtained good results. (C) 2016 Elsevier Ltd. All rights reserved.

C1 [Ma, Minda; Yan, Ran; Du, Yongjie; Ma, Xianrui; Cai, Weiguang; Xu, Pengpeng] Chongqing Univ, Sch Construct Management & Real Estate, Chongqing 400045, Peoples R China.

[Cai, Weiguang] Lawrence Berkeley Natl Lab, China Energy Grp, Berkeley, CA 94720 USA.

RP Cai, WG (reprint author), Chongqing Univ, Sch Construct Management & Real Estate, Chongqing 400045, Peoples R China.

EM cquwgcai@163.com

RI Cai, Weiguang/F-4893-2014

OI Cai, Weiguang/0000-0002-0783-2016

FU Social Science and Humanity on Young Fund of the Ministry of Education

P.R. China [15YJC630003]; National Natural Science Foundation of P.R.

China [71403033]; Fundamental Research Fund for the Central Universities

of P.R. China [106112015CDJXY030009]

FX We thank all the anonymous reviewers for their invaluable and constructive comments on an earlier draft of this manuscript and hence their contribution to the substantial revisions made since that time. We also deeply appreciate Prof. Liyin Shen's substantial help for this revised manuscript. The study was supported by the Social Science and Humanity on Young Fund of the Ministry of Education P.R. China (No. 15YJC630003), National Natural Science Foundation of P.R. China (No. 71403033), and the Fundamental Research Fund for the Central Universities of P.R. China (No. 106112015CDJXY030009).

CR Ang BW, 1997, ENERGY J, V18, P59

Ang BW, 2004, ENER POLICY, V32, P1569, DOI 10.1016/S0301-4215(03)00128-9  
Ang BW, 1998, ENERGY, V23, P489, DOI 10.1016/S0360-5442(98)00016-4  
Cai WG, 2009, ENER POLICY, V37, P2054, DOI 10.1016/j.enpol.2008.11.037  
CAI WG, 2014, NAT ENVIRON POLLUT T, V13, P203  
Cai W.G., 2011, ANAL IMPACT FACTORS  
EHRlich PR, 1971, SCIENCE, V171, P1212, DOI 10.1126/science.171.3977.1212  
Jung S, 2012, ENERGY, V46, P231, DOI 10.1016/j.energy.2012.08.028  
Kaya Y, 1990, IMPACT CARBON DIOXID, P76  
Li S., 2015, J CLEAN PROD  
Lin BQ, 2016, RENEW SUST ENER REV, V53, P1348, DOI 10.1016/j.rser.2015.09.045  
Long W.D., 2005, CHINA ENERGY, V10, P23  
MIIT of\_PRC, 2016, IND GREREN DEV PLAN  
MOHURD\_of\_PRC, 2012, 12 5 YEAR BUILDING E  
MOHURD\_of\_PRC, 2016, CHIN BUILD EN EFF DE  
MOHURD\_of\_PRC, 2014, CHIN BUILD EN EFF DE  
MOHURD\_of\_PRC, 2011, CHIN BUILD EN EFF DE  
REN H, 2014, NAT ENVIRON POLLUT T, V13, P737  
Shen LY, 2016, J CLEAN PROD, V127, P214, DOI 10.1016/j.jclepro.2016.03.151  
Shen LY, 2016, J CLEAN PROD, V112, P1789, DOI 10.1016/j.jclepro.2015.06.108  
The\_State\_Council\_of\_PRC, 2014, CHIN NAT NEW URB PLA  
The\_State\_Council\_of\_PRC, 2007, NOT STAT COUONC ISS  
The\_State\_Council\_of\_PRC, 2011, CHIN POL ACT ADDR CL  
THUBECRC, 2016, 2016 ANN REP DEV CHI  
THUBECRC, 2013, 2013 ANN REP DEV CHI  
THUBECRC, 2015, 2015 ANN REP DEV CHI  
Wang C, 2005, ENERGY, V30, P73, DOI 10.1016/j.energy.2004.04.002  
Wang Q., 2007, ENERGY CONSERV ENV P, V8, P9  
Wang Q, 2016, RENEW SUST ENER REV, V62, P954, DOI 10.1016/j.rser.2016.04.048  
Wu Y., 2009, CHINA BUILDING ENER  
Xu PP, 2015, J CLEAN PROD, V107, P378, DOI 10.1016/j.jclepro.2014.12.101  
Yue T, 2013, APPL ENER, V112, P1510, DOI 10.1016/j.apenergy.2013.02.046  
Zhang W, 2016, ENER POLICY, V92, P369, DOI 10.1016/j.enpol.2016.02.026  
Zhang XL, 2016, J CLEAN PROD, V134, P425, DOI 10.1016/j.jclepro.2015.08.036  
Zhang XL, 2015, J CLEAN PROD, V109, P166, DOI 10.1016/j.jclepro.2014.09.037  
Zhang XL, 2015, J CLEAN PROD, V103, P873, DOI 10.1016/j.jclepro.2015.04.024

NR 36

TC 8

Z9 8

U1 12

U2 25

PU ELSEVIER SCI LTD

PI OXFORD

PA THE BOULEVARD, LANGFORD LANE, KIDLINGTON, OXFORD OX5 1GB, OXON, ENGLAND

SN 0959-6526

EI 1879-1786

J9 J CLEAN PROD

J1 J. Clean Prod.

PD FEB 1

PY 2017

VL 143

BP 784

EP 793

DI 10.1016/j.jclepro.2016.12.046

PG 10

WC GREEN & SUSTAINABLE SCIENCE & TECHNOLOGY; Engineering, Environmental;  
Environmental Sciences

SC Science & Technology - Other Topics; Engineering; Environmental Sciences  
& Ecology



GA EI8WN  
 UT WOS:000392789000069  
 DA 2018-05-03  
 ER

PT J

AU Timilsina, GR  
 Hochman, G  
 Fedets, I

AF Timilsina, Govinda R.  
 Hochman, Gal  
 Fedets, Iryna

TI Understanding energy efficiency barriers in Ukraine: Insights from a survey of commercial and industrial firms

SO ENERGY

LA English

DT Article

DE Energy efficiency; Technology; Adoption; Barriers; Ukraine

ID MANUFACTURING SMES; DRIVING FORCES; ADOPTION; CONSERVATION; INVESTMENTS; MANAGEMENT; BUILDINGS; SECURITY; MODELS; CHINA

AB Improvement of energy efficiency is an important element of energy policy for a sustainable supply of energy in Ukraine. However, the country is facing several challenges to the large-scale deployment of energy efficient technologies. We conducted a two-stage quota sample survey of 509 commercial and industrial firms of all regions of Ukraine to understand the barriers to energy efficiency improvements. Our study finds that more than two-thirds of the commercial and industrial firms in the country view improvement of energy efficiency very important to their business. However, due to several barriers they are unable to realize the improvements of energy efficiency. Among the 19 potential barriers investigated in the study, the survey results show that high upfront investment requirement, lack of government policies to support energy efficiency improvements, higher cost of capital, and lack of information and awareness are the most critical barriers to the improvement of energy efficiency in the industrial and commercial sectors in Ukraine. (C) 2016 Published by Elsevier Ltd.

C1 [Timilsina, Govinda R.] World Bank, Dev Res Grp, Environm & Energy Unit, 1818 H St NW, Washington, DC 20433 USA.

[Hochman, Gal] Rutgers State Univ, Dept Agr Food & Resource Econ, Piscataway, NJ 08855 USA.

[Fedets, Iryna] Inst Econ Res & Policy Consulting, Kiev, Ukraine.

RP Timilsina, GR (reprint author), World Bank, Dev Res Grp, Environm & Energy Unit, 1818 H St NW, Washington, DC 20433 USA.

EM gtimilsina@worldbank.org; gal.hochman@rutgers.edu; fedets@ier.kiev.ua

FU World Bank's Knowledge for Change Program (KCP) [P133056]

FX The authors appreciate two anonymous referees for their constructive comments. The financial support of the World Bank's Knowledge for Change Program (KCP) (P133056) is acknowledged. The views and interpretations herein are the authors and should not be attributed to the World Bank Group or the organizations with which it is affiliated. The authors are also thankful to the Institute for Economic Research and Policy Consulting, Kiev, Ukraine, for undertaking the survey.

CR Annunziata E, 2014, ENER POLICY, V69, P364, DOI 10.1016/j.enpol.2014.02.027  
 Apeaning RW, 2013, J CLEAN PROD, V53, P204, DOI [10.1016/j.jclepro.2013.04.003, 10.1016/j.jclepro.2013.04.003]

Avesani R. G., 2006, WP06105 IMF

Bai J, 2003, ECONOMETRICA, V71, P135, DOI 10.1111/1468-0262.00392

Blass V, 2014, ENERGY, V65, P560, DOI 10.1016/j.energy.2013.11.030

Brunke JC, 2014, J CLEAN PROD, V84, P509, DOI 10.1016/j.jclepro.2014.04.078

Cagno E, 2013, RENEW SUST ENER REV, V19, P290, DOI 10.1016/j.rser.2012.11.007

Correlje A, 2006, ENER POLICY, V34, P532, DOI 10.1016/j.enpol.2005.11.008

Cwiek-Karpowicz J, 2011, POL Q INT AFF, V20, P30

DeCanio SJ, 1998, REV ECON STAT, V80, P95, DOI 10.1162/003465398557366

DeCanio SJ, 1998, ENER POLICY, V26, P441, DOI 10.1016/S0301-4215(97)00152-3

DECANIO SJ, 1993, ENER POLICY, V21, P906, DOI 10.1016/0301-4215(93)90178-I  
de Gouvello C, 2010, ENERGY SECTOR MANAGE  
Delmas MA, 2013, ENER POLICY, V61, P729, DOI 10.1016/j.enpol.2013.05.109  
Dimitrova A, 2009, J EUR PUBLIC POLICY, V16  
Energy Charter Secretariat (ECS), 2013, IN DEPTH REV EN EFF  
Fleiter T, 2011, RENEW SUST ENER REV, V15, P3099, DOI 10.1016/j.rser.2011.03.025  
Forni M, 2000, REV ECON STAT, V82, P540, DOI 10.1162/003465300559037  
Goldthau A, 2008, ENER POLICY, V36, P686, DOI 10.1016/j.enpol.2007.10.012  
IEA, 2012, UKR 2012 EN POL IEA  
IEA, 2014, EN BAL NON OECD COUN  
Kostka G, 2013, J CLEAN PROD, V57, P59, DOI 10.1016/j.jclepro.2013.06.025  
Liu Y, 2014, ENER POLICY, V67, P412, DOI 10.1016/j.enpol.2013.12.022  
McKinsey & Company, 2009, PATHW LOW CARB EC VE  
Ogaranko L, 2013, J EC STRUCT, V2, P1  
Rohdin P, 2006, ENERGY, V31, P1836, DOI 10.1016/j.energy.2005.10.010  
Ruparathna R, 2016, RENEW SUST ENER REV, V53, P1032, DOI 10.1016/j.rser.2015.09.084  
Sabatini F., 2005, ROLE SOCIAL CAPITAL  
Sardianou E, 2008, J CLEAN PROD, V16, P1416, DOI 10.1016/j.jclepro.2007.08.002  
Schleich J, 2009, ECOL ECON, V68, P2150, DOI 10.1016/j.ecolecon.2009.02.008  
Soderbergh B, 2010, ENER POLICY, V38, P7827, DOI 10.1016/j.enpol.2010.08.042  
Sorrell Steve, 2004, EC ENERGY EFFICIENCY  
Costa-Campi MT, 2015, ENER POLICY, V83, P229, DOI 10.1016/j.enpol.2015.01.037  
Thollander P, 2007, ENER POLICY, V35, P5774, DOI 10.1016/j.enpol.2007.06.013  
Timilsina GR, 2000, POLLUT ATMOS, P79  
Trianni A, 2013, ENER POLICY, V61, P430, DOI 10.1016/j.enpol.2013.06.034  
Trianni A, 2013, ENERGY, V49, P444, DOI 10.1016/j.energy.2012.10.012  
Trianni A, 2013, J CLEAN PROD, V40, P161, DOI 10.1016/j.jclepro.2012.08.040  
Trianni A, 2012, ENERGY, V37, P494, DOI 10.1016/j.energy.2011.11.005  
World Bank, 2011, TRANSITION LOW EMISS  
Zhang ZG, 2013, ENER POLICY, V57, P36, DOI 10.1016/j.enpol.2012.07.011

NR 41

TC 8

Z9 8

U1 1

U2 11

PU PERGAMON-ELSEVIER SCIENCE LTD

PI OXFORD

PA THE BOULEVARD, LANGFORD LANE, KIDLINGTON, OXFORD OX5 1GB, ENGLAND

SN 0360-5442

EI 1873-6785

J9 ENERGY

J1 Energy

PD JUL 1

PY 2016

VL 106

BP 203

EP 211

DI 10.1016/j.energy.2016.03.009

PG 9

WC Thermodynamics; Energy & Fuels

SC Thermodynamics; Energy & Fuels

GA DP7DP

UT WOS:000378659700020

DA 2018-05-03

ER

PT J

AU Ramos, A

Labandeira, X

Loschel, A

AF Ramos, Ana

Labandeira, Xavier

Loeschel, Andreas

TI Pro-environmental Households and Energy Efficiency in Spain

SO ENVIRONMENTAL & RESOURCE ECONOMICS

LA English

DT Article

DE Energy efficiency; Investment; Behavior; Habits

ID SPLIT INCENTIVES; WARM CLIMATES; COLD HOUSES; ATTITUDES; BEHAVIOR;  
DEMAND; CONSUMPTION; ECONOMICS; PARADOX; POLICY

AB The residential building sector is a major driver of current and future energy consumption and associated emissions, which can be potentially mitigated through significant energy-efficiency (EE) improvements in both emerging and developed countries. Yet, there are several persistent barriers that hinder the attainment of EE improvements in this area. Using data from a 2008 national representative survey of Spanish households, this paper is interested in the determinants of EE-related decisions. In particular, a discrete-choice model empirically analyzes whether pro-environmental households are more likely to invest in EE and to adopt daily energy-saving habits. We show that households with eco-friendly behaviors are more likely to investment in well-differentiated EE measures as well as to steer daily habits towards energy savings. However, no effects are found for households with environmental attitudes based on stated willingness to pay to protect the environment. In addition to this, households belonging to higher income groups and education levels are more likely to invest in EE but not to adopt energy-saving habits; while households with older members are less likely to invest in EE and show fewer eco-friendly habits.

C1 [Ramos, Ana; Labandeira, Xavier] Univ Vigo, Fac CC Econ, Campus Lagoas, Vigo 36310, Spain.

[Ramos, Ana; Labandeira, Xavier] Econ Energy, Vigo, Spain.

[Labandeira, Xavier] FSR Climate European Univ Inst, Florence, Italy.

[Loeschel, Andreas] Univ Munster, Ctr Appl Econ Res Munster CAWM, Stadtgraben 9, D-48143 Munster, Germany.

[Loeschel, Andreas] Ctr European Econ Res ZEW, Mannheim, Germany.

RP Ramos, A (reprint author), Univ Vigo, Fac CC Econ, Campus Lagoas, Vigo 36310, Spain.

EM anaramos@uvigo.es; xavier@uvigo.es; loeschel@uni-muenster.de

OI Loschel, Andreas/0000-0002-3366-8053

CR Ameli N, 2014, 1165 OECD EC DEP

Brechling V, 1994, FISCAL STUDIES, V15, P44, DOI DOI 10.1111/J.1475-5890.1994.TB00196.X

Brounen D, 2013, ENERG ECON, V38, P42, DOI 10.1016/j.eneco.2013.02.008

Costa Dora L., 2010, 15978 NBER

Davis Lucas W., 2012, DESIGN IMPLEMENTATIO

DEWEES DN, 1990, J POLIT ECON, V98, P656, DOI 10.1086/261699

Di Maria C, 2008, SCOTTISH J POLITICAL, V57, P48

Ek K, 2010, ENERG POLICY, V38, P1578, DOI 10.1016/j.enpol.2009.11.041

ESHMA INE, 2010, ENC COND VID 2008

European Commission, 2011, COM109 EUR COMM

FRIEDMAN D, 1987, J POLIT ECON, V95, P1089, DOI 10.1086/261503

Gago A., 2013, HDB ENERGY CLIMATE C

Galarraga I, 2011, J CLEAN PROD, V19, P2057

Galarraga I, 2011, ENERG ECON, V33, pS66, DOI 10.1016/j.eneco.2011.07.028

Gillingham K, 2006, ANNU REV ENV RESOUR, V31, P161, DOI 10.1146/annurev.energy.31.020105.100157

Gillingham K, 2012, ENERG J, V33, P37, DOI 10.5547/01956574.33.2.3

Gillingham K, 2009, ANNU REV RESOUR ECON, V1, P597, DOI 10.1146/annurev.resource.102308.124234

Green C., 1999, VALUING ENV PREFEREN

Greene W., 2008, ECONOMETRIC ANAL

IDAE, 2011, PROYECT SECH SPAHOUS

IEA (International Energy Agency), 2013, TRANS SUST BUILD STR

IEA, 2007, MIND GAP QUANT PRINC

JAFFE AB, 1994, ENERG POLICY, V22, P804, DOI 10.1016/0301-4215(94)90138-4

Kahn ME, 2007, J ENVIRON ECON MANAG, V54, P129, DOI 10.1016/j.jeem.2007.05.001

- Kahn ME, 2009, BE J ECON ANAL POLI, V9, DOI [10.2202/1935-1682.2030, DOI 10.2202/1935-1682.2030]  
 Knack S, 1997, Q J ECON, V112, P1251, DOI 10.1162/003355300555475  
 Kolmuss A., 2002, ENVIRON EDUC RES, V8, P239, DOI DOI 10.1080/13504620220145401  
 Kotchen MJ, 2007, J ENVIRON ECON MANAG, V53, P1, DOI 10.1016/j.jeem.2006.06.003  
 Lange I, 2014, ECOL ECON, V107, P76, DOI 10.1016/j.ecolecon.2014.07.021  
 J Laustsen, 2008, ENERGY EFFICIENCY RE  
 Levine M., 2007, CLIMATE CHANGE 2007  
 Levinson A, 2004, RESOUR ENERGY ECON, V26, P51, DOI [10.1016/S0928-7655(03)00047-2, 10.1016/50928-7655(03)00047-2]  
 Linares P, 2010, J ECON SURV, V24, P573, DOI 10.1111/j.1467-6419.2009.00609.x  
 Loschel A, 2013, ECON LETT, V118, P415, DOI 10.1016/j.econlet.2012.12.007  
 Loureiro M, 2013, ENERG ECON, V40, pS126  
 Markandya A, 2015, GREEN ENERGY EFFICIE  
 Maruejols L, 2011, ENERG POLICY, V39, P3655, DOI 10.1016/j.enpol.2011.03.072  
 Miller KH, 2014, 2014 AAEE ANN M MINN  
 Odyssee, 2014, DAT EN EFF IND  
 OECD, 2013, TECHNICAL REPORT  
 Owen AL, 2006, ECOL ECON, V58, P814, DOI 10.1016/j.ecolecon.2005.09.007  
 Ryan L, 2011, IEA ENERGY EFFICIENC  
 Torgler B, 2007, ECOL ECON, V63, P536, DOI 10.1016/j.ecolecon.2006.12.013  
 Urge-Vorsatz D, 2008, ENERG POLICY, V36, P642, DOI 10.1016/j.enpol.2007.10.009  
 van den Bergh JCJM, 2008, ECOL ECON, V66, P559, DOI 10.1016/j.ecolecon.2008.04.007  
 Vassileva I, 2012, ENERGY, V46, P94, DOI 10.1016/j.energy.2012.02.069  
 Wooldridge J. M., 2001, ECONOMETRIC ANAL CRO

NR 47

TC 8

Z9 8

U1 6

U2 22

PU SPRINGER

PI NEW YORK

PA 233 SPRING ST, NEW YORK, NY 10013 USA

SN 0924-6460

EI 1573-1502

J9 ENVIRON RESOUR ECON

JI Environ. Resour. Econ.

PY 2016

VL 63

IS 2

SI SI

BP 367

EP 393

DI 10.1007/s10640-015-9899-8

PG 27

WC Economics; Environmental Studies

SC Business &amp; Economics; Environmental Sciences &amp; Ecology

GA DC6FI

UT WOS:000369314800008

DA 2018-05-03

ER

PT J

AU Marechal, K

Holzemer, L

AF Marechal, Kevin

Holzemer, Laurence

TI Getting a (sustainable) grip on energy consumption: The importance of household dynamics and 'habitual practices'

SO ENERGY RESEARCH & SOCIAL SCIENCE

LA English

DT Article

DE Energy consumption; Practice theories; Habits; Grips; Energy-saving tools

AB Considering the insufficient results achieved so far by energy-saving policies, the stance of this paper is to depart from an 'expert' view and base the analysis on those energy-related practices that are meaningful to practitioners (e.g., showering, cooking, listening to music). The framework described in this paper builds on the concept of habitual practices. Its rationale is to provide a precise characterisation of household energy-related practices allowing for a good understanding of their content together with a clearer picture of how they are formed and sustained over time. This constitutes a necessary step prior to reflecting on the type of interventions that could influence practices towards more sustainable configurations. The notion of 'grips' is then introduced with the aim of putting this characterisation into a form that is more operational for policy-makers. Grips are elements that have to be '(de-) activated' for supporting a targeted behavioral change. Identifying grips can enrich the characterization of consumption profiles and then be used as a dialogue interface between those profiles and the design of innovative energy-saving tools. This scheme is then applied within a dynamic perspective of the change process whereby a new practice has to be triggered, sustained and stabilized. (C) 2015 Elsevier Ltd. All rights reserved.

C1 [Marechal, Kevin; Holzemer, Laurence] Univ Libre Bruxelles, CESSE ULB, Brussels, Belgium.

[Marechal, Kevin] FNRS Belgian Natl Fund Res, Brussels, Belgium.

[Marechal, Kevin] Univ Liege, Gembloux Agr Bio Tech, Liege, Belgium.

RP Marechal, K (reprint author), Univ Libre Bruxelles, CESSE ULB, Brussels, Belgium.

EM kevin.marechal@ulb.ac.be

CR Abrahamse W, 2005, J ENVIRON PSYCHOL, V25, P273, DOI 10.1016/j.jenvp.2005.08.002

Adriaanse MA, 2011, PERS SOC PSYCHOL B, V37, P502, DOI 10.1177/0146167211399102

Bager S. L., 2014, THESIS

BANDURA A, 1991, ORGAN BEHAV HUM DEC, V50, P248, DOI 10.1016/0749-5978(91)90022-L

Bartiaux F, 2008, J CLEAN PROD, V16, P1170, DOI 10.1016/j.jclepro.2007.08.013

Berker T., 2013, SUSTAINABILITY SCI P, V9, P57

Bourdieu P., 1977, OUTLINE THEOTY PRACT

Brette O, 2014, J I ECON, V10, P399, DOI 10.1017/S1744137414000149

Burgess J, 2008, ENERG POLICY, V36, P4454, DOI 10.1016/j.enpol.2008.09.039

CALLON M, 1992, RES POLICY, V21, P215, DOI 10.1016/0048-7333(92)90017-X

Collider M., 2014, ENERGY RES SOC SCI, V2, P21

D'Oca S, 2014, ENERGY RES SOC SCI, V3, P131, DOI 10.1016/j.erss.2014.07.015

Darby S, 2006, EFFECTIVENESS FEEDBA

DAVID PA, 1985, AM ECON REV, V75, P332

Deci EL, 1985, INTRINSIC MOTIVATION

Desmedt J, 2009, J CLEAN PROD, V17, P455, DOI 10.1016/j.jclepro.2008.08.017

Duarte R, 2013, ECOL ECON, V96, P1, DOI 10.1016/j.ecolecon.2013.09.007

EEA, 2013, 52013 EEA

Ehrhardt-Martinez K., 2010, E105 ACEEE

Evans D., 1920, HABITS CONSUMPTION S, V12, P113

Fischer C, 2008, ENERG EFFIC, V1, P79, DOI 10.1007/s12053-008-9009-7

Fujii S, 2001, ENVIRON BEHAV, V33, P796, DOI 10.1177/00139160121973241

Giddens A., 1984, CONSTITUTION SOC OUT

Gollwitzer PM, 1999, AM PSYCHOL, V54, P493, DOI 10.1037//0003-066X.54.7.493

Gram-Hanssen K, 2014, BUILD RES INF, V42, P393, DOI 10.1080/09613218.2014.911572

Gram-Hanssen K, 2011, J CONSUM CULT, V11, P61, DOI 10.1177/1469540510391725

Gram-Hanssen K., 2008, P 2008 SCOR C SUST C

Griskevicius V, 2010, J PERS SOC PSYCHOL, V98, P392, DOI 10.1037/a0017346

Giotiow A., 2008, J I EC, V4, P351

Halkier B, 2001, INT J FOOD SCI TECH, V36, P801, DOI 10.1046/j.1365-2621.2001.00537.x

Halkier B, 2010, QUAL RES, V10, P71, DOI 10.1177/1468794109348683

Hand M, 2005, SOCIOL RES ONLINE, V10

Hardy CL, 2006, PERS SOC PSYCHOL B, V32, P1402, DOI 10.1177/0146167206291006

Hargreaves T, 2013, ENVIRON PLANN A, V45, P402, DOI 10.1068/a45124

Hargreaves T, 2013, ENERG POLICY, V52, P126, DOI 10.1016/j.enpol.2012.03.027

- Hargreaves T, 2011, J CONSUM CULT, V11, P79, DOI 10.1177/1469540510390500
- Hargreaves T, 2010, ENERG POLICY, V38, P6111, DOI 10.1016/j.enpol.2010.05.068
- Harris J., 2007, P ECEEE 2007 SUMM ST
- Hodgson G. M., 1997, Structural Change and Economic Dynamics, V8, P399, DOI 10.1016/S0954-349X(96)00073-2
- Hodgson GM, 2007, ORGAN STUD, V28, P95, DOI 10.1177/0170840607067832
- Hodgson G, 2010, J EVOL ECON, V20, P1, DOI 10.1007/s00191-009-0134-z
- Hodgson GM, 2004, J ECON PSYCHOL, V25, P651, DOI 10.1016/j.joep.2003.03.001
- Judson EP, 2014, BUILD RES INF, V42, P501, DOI 10.1080/09613218.2014.894808
- Kilpinen E., 2012, HABITS CONSUMPTION S, V12, P45
- Lopes MAR, 2015, ENERGY RES SOC SCI, V7, P84, DOI 10.1016/j.erss.2015.03.004
- Lutzenhiser L, 2014, ENERGY RES SOC SCI, V1, P141, DOI 10.1016/j.erss.2014.03.011
- Marechal K., 2012, EC CLIMATE CHANGE CH, P190
- Marechal K., 2015, RECASTING UNDERSTAND
- Marechal K, 2007, ENERG POLICY, V35, P5181, DOI 10.1016/j.enpol.2007.05.009
- Marechal K, 2010, ECOL ECON, V69, P1104, DOI 10.1016/j.ecolecon.2009.12.004
- Marechal K, 2009, J ECON ISSUES, V43, P69, DOI 10.2753/JEI0021-3624430104
- McMeekin A, 2012, TECHNOL ANAL STRATEG, V24, P345, DOI 10.1080/09537325.2012.663960
- Moezzi M, 2014, ENERGY RES SOC SCI, V1, P30, DOI 10.1016/j.erss.2014.03.014
- Mylan J., 2014, J CLEAN PRODUCT
- Ouellette JA, 1998, PSYCHOL BULL, V124, P54, DOI 10.1037//0033-2909.124.1.54
- Parnell R, 2005, ENVIRON BEHAV, V37, P787, DOI 10.1177/0013916504274008
- Reckwitz A., 2002, EUR J SOC THEORY, V5, P243, DOI [10.1177/13684310222225432, DOI 10.1177/13684310222225432]
- Ropke I, 2009, ECOL ECON, V68, P2490, DOI 10.1016/j.ecolecon.2009.05.015
- Sanne C, 2002, ECOL ECON, V42, P273, DOI 10.1016/S0921-8009(02)00086-1
- Schafer M., 2012, J CONSUM POLICY, V35, P65, DOI DOI 10.1007/S10603-011-9181-6
- Schatzki T., 1996, SOCIAL PRACTICES WIT
- Schatzki T., 2013, SUSTAINABLE PRACTICE, P31
- Schatzki Theodore R, 2001, PRACTICE TURN CONT T
- Schatzki Theodore R., 2002, SITE SOCIAL PHILOS A
- Schleich J, 2013, ENERG POLICY, V61, P1097, DOI 10.1016/j.enpol.2013.05.012
- Schultheiss O. C., 2008, HDB PERSONALITY THEO, V3, P603
- Shove E., 2012, J ACAD SOC SCI, P1
- Shove E., 2012, DYNAMICS SOCIAL PRAC
- Shove E., 2006, OFF EDGE EXPT CULTUR, P59
- Shove E., 2012, HABITS CONSUMPTION, P100
- Shove E, 2014, THEOR CULT SOC, V31, P41, DOI 10.1177/0263276414536746
- Shove E, 2010, ENVIRON PLANN A, V42, P1273, DOI 10.1068/a42282
- Southerton D, 2013, TIME SOC, V22, P335, DOI 10.1177/0961463X12464228
- Southwell BG, 2014, ENERGY RES SOC SCI, V2, P59, DOI 10.1016/j.erss.2014.03.019
- Sovacool BK, 2014, NATURE, V511, P529, DOI 10.1038/511529a
- Sovacool B. K., 2014, ENERGY RES SOC SCI, V1, P1
- Spaargaren G, 2011, GLOBAL ENVIRON CHANG, V21, P813, DOI 10.1016/j.gloenvcha.2011.03.010
- Spurling N., 2013, INTERVENTIONS PRACTI
- Stephenson J, 2010, ENERG POLICY, V38, P6120, DOI 10.1016/j.enpol.2010.05.069
- Stirling A, 2014, ENERGY RES SOC SCI, V1, P83, DOI 10.1016/j.erss.2014.02.001
- Strengers Y, 2011, J CONSUM CULT, V11, P319, DOI 10.1177/1469540511417994
- Unruh GC, 2000, ENERG POLICY, V28, P817, DOI 10.1016/S0301-4215(00)00070-7
- VEBLEN T., 1919, PLACE SCI MODERN CIV
- Veblen T., 1898, AM J SOCIOL, V4, P187
- Veblen T, 1994, THEORY LEISURE CLASS
- Veblen Thorstein, 1898, Q J ECON, V12, P373, DOI DOI 10.2307/1882952
- Verplanken B, 1999, EUR J SOC PSYCHOL, V29, P591, DOI 10.1002/(SICI)1099-0992(199908/09)29:5/6<591::AID-EJSP948>3.0.CO;2-H
- Verplanken B, 2006, BRIT J SOC PSYCHOL, V45, P639, DOI 10.1348/014466605X49122
- Verplanken B, 2006, J PUBLIC POLICY MARK, V25, P90, DOI 10.1509/jppm.25.1.90
- Walker G, 2014, ENERGY RES SOC SCI, V1, P49, DOI 10.1016/j.erss.2014.03.012

Warde A., 2012, HABITS CONSUMPTION S, V12, P1  
Warde A, 2005, J CONSUM CULT, V5, P131, DOI DOI 10.1177/1469540505053090  
Warde A, 2014, J CONSUM CULT, V14, P279, DOI 10.1177/1469540514547828  
Wilhite H., 2000, P ACEEE 2000 SUMM ST  
Wilk R., 2009, TIME CONSUMPTION EVE  
Wilson C, 2015, ENERGY RES SOC SCI, V7, P12, DOI 10.1016/j.erss.2015.03.002  
Wood G, 2007, INT J ENERG RES, V31, P56, DOI 10.1002/er.1228  
Wood W, 2007, PSYCHOL REV, V114, P843, DOI 10.1037/0033-295X.114.4.843  
NR 98  
TC 8  
Z9 8  
U1 2  
U2 2  
PU ELSEVIER SCIENCE BV  
PI AMSTERDAM  
PA PO BOX 211, 1000 AE AMSTERDAM, NETHERLANDS  
SN 2214-6296  
EI 2214-6326  
J9 ENERGY RES SOC SCI  
JI Energy Res. Soc. Sci.  
PD NOV  
PY 2015  
VL 10  
BP 228  
EP 239  
DI 10.1016/j.erss.2015.06.013  
PG 12  
WC Environmental Studies  
SC Environmental Sciences & Ecology  
GA V3Y7J  
UT WOS:000218708600022  
DA 2018-05-03  
ER  
  
PT J  
AU Yu, BY  
    Tian, YM  
    Zhang, JY  
AF Yu, Biying  
    Tian, Yaming  
    Zhang, Junyi  
TI A dynamic active energy demand management system for evaluating the  
    effect of policy scheme on household energy consumption behavior  
SO ENERGY  
LA English  
DT Article  
DE Household energy consumption behavior; Policy scheme; DAEDMS (Dynamic  
    active energy demand management system); Timing effect; Dynamic  
    simulation  
ID ENVIRONMENTAL ATTITUDES; CONSERVATION; EMISSIONS; DETERMINANTS;  
    EFFICIENCY; REDUCTION; IMPACT  
AB To reduce the continuously increasing energy consumption in the household sector, including residential  
    and private transport sectors, it is important to design a proper policy scheme to regulate household  
    energy demand. However, determining how to evaluate the collective effect of multiple countermeasures  
    in one policy scheme on household energy related behavior is very challenging; furthermore, the potential  
    interactions between policies due to the timing effect cannot be overlooked. Under these concerns, this  
    study provides a quantitative methodology by developing a DAEDMS (dynamic active energy demand  
    management system) that can evaluate the overall effects of urban planning, soft policies for improving

household/individual awareness, technology-improvement/rebate policies, market end-use diffusion control, and social-interaction oriented policies. The timing effect is directly incorporated by allowing the free setting of the execution period for each policy. Building on this demand management system, the quantified policy schemes and the pathways that can reach the target of energy conservation become straightforward, providing helpful support for policy planning. Besides, the variant effectiveness of policy schemes due to different policy timings admonishes the policy makers to realize that the current fragmented regime of policy making between different departments is undesirable for capturing the genuine effect of all of the policies. (C) 2015 Elsevier Ltd. All rights reserved.

C1 [Yu, Biying] Beijing Inst Technol, Sch Management & Econ, Beijing 100181, Peoples R China.

[Tian, Yaming] Econ & Planning Res Inst China Railway Corp, Beijing 100055, Peoples R China.

[Zhang, Junyi] Hiroshima Univ, Grad Sch Int Dev & Cooperat, Higashihiroshima 7398529, Japan.

RP Yu, BY (reprint author), Room 367 C1-3,C Cluster,Nishikyo Ku, Kyoto 6158540, Japan.

EM yubiyinjapan@yahoo.co.jp

RI Zhang, Junyi/B-4865-2012

OI Zhang, Junyi/0000-0002-3267-542X

CR Abrahamse W, 2005, J ENVIRON PSYCHOL, V25, P273, DOI 10.1016/j.jenvp.2005.08.002

Allcott H, 2011, J PUBLIC ECON, V95, P1082, DOI 10.1016/j.jpubeco.2011.03.003

Beijing Municipal Statistics Bureau, 2001, BEIJ STAT YB

Brand C, 2013, APPL ENERG, V104, P158, DOI 10.1016/j.apenergy.2012.11.001

Chuanwen J., 2005, ENERGY CONVERSION MA, P2689

Conti J. J., 2014, ANN ENERGY OUTLOOK 2

Ellis Mark, 2009, GADGETS GIGAWATTS PO

Emeakaroha A, 2014, ENERGY, V76, P357, DOI 10.1016/j.energy.2014.08.027

Fernandez C, 2005, J ECONOMETRICS, V126, P411, DOI 10.1016/j.jeconom.2004.05.008

Fortes P, 2014, ENERGY, V73, P716, DOI 10.1016/j.energy.2014.06.075

Freire-Gonzalez J, 2011, ECOL MODEL, V223, P32, DOI 10.1016/j.ecolmodel.2011.09.001

Gardner G.T., 1996, ENV PROBLEMS HUMAN B

Gaspar R, 2011, ENER POLICY, V39, P7335, DOI 10.1016/j.enpol.2011.08.057

Gomi K, 2011, TECHNOL FORECAST SOC, V78, P852, DOI 10.1016/j.techfore.2011.01.002

Han S, 2014, PHYSICA A, V394, P99, DOI 10.1016/j.physa.2013.10.003

Holden Erling, 2010, International Journal of Sustainable Development, V13, P217, DOI 10.1504/IJSD.2010.037555

LEA, 2009, TRANSP EN CO2 MOV SU

Jain RK, 2013, ENER BUILDINGS, V66, P119, DOI 10.1016/j.enbuild.2013.06.029

Jalali MM, 2015, ENERGY, V81, P766, DOI 10.1016/j.energy.2015.01.027

Keirstead J, 2006, ENER POLICY, V34, P3065, DOI 10.1016/j.enpol.2005.06.004

Khansari N, 2014, PROCEDIA COMPUT SCI, V28, P81, DOI 10.1016/j.procs.2014.03.011

LEE LF, 1983, ECONOMETRICA, V51, P507, DOI 10.2307/1912003

Lin BQ, 2013, ENERGY, V58, P330, DOI 10.1016/j.energy.2013.06.018

Martinsson J, 2011, ENER POLICY, V39, P5182, DOI 10.1016/j.enpol.2011.05.046

Nassen J, 2014, ENERGY, V66, P98, DOI 10.1016/j.energy.2014.01.019

Ohler AM, 2014, ECOL ECON, V107, P1, DOI 10.1016/j.ecolecon.2014.07.031

Ozaki R, 2011, ENER POLICY, V39, P2217, DOI 10.1016/j.enpol.2010.04.024

Rahut DB, 2014, ENERGY, V69, P661, DOI 10.1016/j.energy.2014.03.062

Sapci O, 2014, J BEHAV EXP ECON, V52, P29, DOI 10.1016/j.socec.2014.06.001

Solaymani S, 2015, ENERGY, V81, P719, DOI 10.1016/j.energy.2015.01.017

Sorrell S, 2009, ENER POLICY, V37, P1356, DOI 10.1016/j.enpol.2008.11.026

Train KE, 2009, DISCRETE CHOICE METHODS WITH SIMULATION, 2ND EDITION, P1, DOI 10.1017/CBO9780511805271

Valente TW, 2012, SCIENCE, V337, P49, DOI 10.1126/science.1217330

Wang Q, 2014, ENERGY, V77, P691, DOI 10.1016/j.energy.2014.09.060

Yu BY, 2013, TRANSPORT RES D-TR E, V24, P62, DOI 10.1016/j.trd.2013.06.001

Yu BY, 2013, ENER POLICY, V57, P441, DOI 10.1016/j.enpol.2013.02.024

Yu BY, 2012, ENER POLICY, V46, P319, DOI 10.1016/j.enpol.2012.03.067

Yu BY, 2011, ENER POLICY, V39, P4168, DOI 10.1016/j.enpol.2011.04.024

NR 38

TC 8

Z9 10



U1 1  
 U2 15  
 PU PERGAMON-ELSEVIER SCIENCE LTD  
 PI OXFORD  
 PA THE BOULEVARD, LANGFORD LANE, KIDLINGTON, OXFORD OX5 1GB, ENGLAND  
 SN 0360-5442  
 EI 1873-6785  
 J9 ENERGY  
 JI Energy  
 PD NOV  
 PY 2015  
 VL 91  
 BP 491  
 EP 506  
 DI 10.1016/j.energy.2015.07.131  
 PG 16  
 WC Thermodynamics; Energy & Fuels  
 SC Thermodynamics; Energy & Fuels  
 GA CX0BU  
 UT WOS:000365362700045  
 DA 2018-05-03  
 ER

PT J

AU Vandevyvere, H  
 Nevens, F

AF Vandevyvere, Han  
 Nevens, Frank

TI Lost in Transition or Geared for the S-Curve? An Analysis of Flemish  
 Transition Trajectories with a Focus on Energy Use and Buildings

SO SUSTAINABILITY

LA English

DT Article

ID SUSTAINABLE CITIES; CLIMATE-CHANGE; URBAN; GOVERNANCE; ENVIRONMENT;  
 CHALLENGES; INNOVATION; PATHWAYS; SUBURBS; POLICY

AB In recent years, many cities have adopted action plans to become climate neutral in the coming decades. Hereby, a strong motivational factor has been the goal to realize a win-win situation in the long term: climate neutrality and sustainable functioning are not only beneficial for the environment, but are equally beneficial for society and for the economy if well-integrated trajectories are adopted. Nevertheless, as actors across the fields start to implement these plans, many practical obstacles have arisen. These barriers are typical of a systemic transition: dominant practices are characterized by path dependencies, vast institutional frameworks and vested interests that are hard to break through. At the same time, relevant initiatives typically show some elements of uncertainty and a long term return, factors that make it difficult to attract financial investments. The present article addresses the state of the art for current transition experiments in the region of Flanders, Belgium, focusing on actions related to energy and buildings in cities. A brief overview of the state of affairs in several cities and provinces is presented, and some important opportunities and bottlenecks are identified. The resultant findings are tested against the framework of transition theory and related literature on the subject. Subsequently, a set of possible strategies to overcome the above mentioned barriers is formulated. These strategies focus on effectively mobilizing actors and investments.

C1 [Vandevyvere, Han] Flemish Inst Technol Res VITO, Unit Smart Energy & Built Environm, BE-2400 Mol, Belgium.

[Nevens, Frank] Flemish Inst Technol Res VITO, VITO Transit Platform, BE-2400 Mol, Belgium.

RP Vandevyvere, H (reprint author), Flemish Inst Technol Res VITO, Unit Smart Energy & Built Environm, Boeretang 200, BE-2400 Mol, Belgium.

EM han.vandevyvere@vito.be; frank.nevens@vito.be

RI Nevens, Frank/G-7429-2016

CR Arcadis, 2010, OPM CO2 NULM STAD GE

- Bai XM, 2010, CURR OPIN ENV SUST, V2, P129, DOI 10.1016/j.cosust.2010.05.008
- Barratt M, 2011, J OPER MANAG, V29, P329, DOI 10.1016/j.jom.2010.06.002
- Bellucci F, 2012, ELEMENTS, V8, P445, DOI 10.2113/gselements.8.6.445
- Bulkeley H, 2005, ENVIRON POLIT, V14, P42, DOI 10.1080/0964401042000310178
- Bulkeley H, 2011, ROUTL STUD HUM GEOGR, V35, P29
- Cooperrider D. L., 2003, APPRECIATIVE INQUIRY
- Dixon T, 2013, BUILD RES INF, V41, P499, DOI 10.1080/09613218.2013.812432
- Porto MD, 2014, LANG COMMUN, V39, P14, DOI 10.1016/j.langcom.2014.05.001
- EISENHARDT KM, 1989, ACAD MANAGE REV, V14, P532, DOI 10.2307/258557
- Ernstson H, 2010, AMBIO, V39, P531, DOI 10.1007/s13280-010-0081-9
- Flynn B., 1990, J OPER MANAG, V9, P254
- Frantzeskaki N., 2011, URBAN TRANSITION MAN
- Frantzeskaki Niki, 2012, International Journal of Sustainable Development, V15, P19, DOI 10.1504/IJSD.2012.044032
- Frantzeskaki N, 2009, FUTURES, V41, P593, DOI 10.1016/j.futures.2009.04.009
- Geels FW, 2007, RES POLICY, V36, P399, DOI 10.1016/j.respol.2007.01.003
- Gibbs D., 2014, P GEOGR INN 2014 C U
- GIDDENS A, 1984, MODERNITY SELF IDENT
- Glaser BG, 1967, DISCOVERY GROUNDED T
- Gorissen L., 2011, TOTAAL ACTIEPLAN CO2
- Grimm NB, 2008, SCIENCE, V319, P756, DOI 10.1126/science.1150195
- Grin J., 2010, TRANSITIONS SUSTAINA
- HARDIN G, 1968, SCIENCE, V162, P1243
- ICLEI, 2010, CIT POST 2012 CLIM P
- James P, 2012, ENVIRON DEV, V2, P6, DOI 10.1016/j.envdev.2012.02.002
- Jefferies C., 2011, P 12 INT C URB DRAIN
- KEMP R, 1994, FUTURES, V26, P1023, DOI 10.1016/0016-3287(94)90071-X
- Kemp R., 2005, ENV INNOVATION SYSTE, P33
- Khan J., 2010, P 2 UNITAR YAL C ENV
- Loorbach D., 2009, WORKSH URB TRANS MAN
- Loorbach D, 2007, TRANSITION MANAGEMEN
- Madlener R, 2011, SUSTAIN CITIES SOC, V1, P45, DOI 10.1016/j.scs.2010.08.006
- Markard J, 2012, RES POLICY, V41, P955, DOI 10.1016/j.respol.2012.02.013
- MCINTYRE Alice, 2008, QUALITATIVE RES METH, V52
- Nevens F, 2014, SUSTAIN CITIES SOC, V10, P112, DOI 10.1016/j.scs.2013.06.001
- Nevens F, 2013, J CLEAN PROD, V50, P111, DOI 10.1016/j.jclepro.2012.12.001
- Newton PW, 2013, BUILD RES INF, V41, P575, DOI 10.1080/09613218.2013.803921
- ROTMANS J, 2000, ENVIRON IMPACT ASSES, V20, P265
- Rotmans J., 2008, VRIJ U BRUSS SEM CRO
- Schaltegger S, 2011, BUS STRATEG ENVIRON, V20, P222, DOI 10.1002/bse.682
- Seto KC, 2010, ANNU REV ENV RESOUR, V35, P167, DOI 10.1146/annurev-environ-100809-125336
- Spath P, 2012, EUR PLAN STUD, V20, P461, DOI 10.1080/09654313.2012.651800
- Stad Antwerpen-Stadsontwikkeling EMA, 2012, EM INV 2012 UNPUB
- Theodoridou I, 2012, ENERG POLICY, V44, P207, DOI 10.1016/j.enpol.2012.01.042
- Van den Dobbelaer A., 2009, REAP ROTTERDAM ENERG
- Vandevyvere H., 2013, TRANSITIE NAAR LEUVE
- Vandevyvere H, 2012, SUSTAINABILITY-BASEL, V4, P1309, DOI 10.3390/su4061309
- Van Sande I., 2011, MILIEUDIENST S UNPUB
- Vergragt P., 2010, P SUSS EN GROUP C EN
- Westley F, 2011, AMBIO, V40, P762, DOI 10.1007/s13280-011-0186-9
- Williams K, 2013, BUILD RES INF, V41, P517, DOI 10.1080/09613218.2013.808893
- Yin R. K., 2003, CASE STUDY RES DESIG
- Zeijl-Rozema A. van, 2010, Sustainability: Science, Practice & Policy, V6, P6

NR 53

TC 8

Z9 8

U1 0

U2 16

PU MDPI AG  
PI BASEL  
PA POSTFACH, CH-4005 BASEL, SWITZERLAND  
SN 2071-1050  
J9 SUSTAINABILITY-BASEL  
JI Sustainability  
PD MAR  
PY 2015  
VL 7  
IS 3  
BP 2415  
EP 2436  
DI 10.3390/su7032415  
PG 22  
WC GREEN & SUSTAINABLE SCIENCE & TECHNOLOGY; Environmental Sciences;  
Environmental Studies  
SC Science & Technology - Other Topics; Environmental Sciences & Ecology  
GA CE5AZ  
UT WOS:000351843400008  
OA gold  
DA 2018-05-03  
ER

PT J  
AU Wijaya, ME  
Tezuka, T  
AF Wijaya, Muhammad Ery  
Tezuka, Tetsuo  
TI Measures for improving the adoption of higher efficiency appliances in  
Indonesian households: An analysis of lifetime use and decision-making  
in the purchase of electrical appliances  
SO APPLIED ENERGY  
LA English  
DT Article; Proceedings Paper  
CT 4th International Conference on Applied Energy (ICAE)  
CY JUL 01-04, 2012  
CL Suzhou, PEOPLES R CHINA  
DE Appliance lifetime; Decision-making; Energy efficiency; Households;  
Indonesia  
ID CONSUMPTION

AB One approach to decreasing electricity consumption is to facilitate the replacement of older appliances with new, higher-efficiency. The objectives of this paper are to compare and analyse the replacement of appliances in two cities of Indonesia - Yogyakarta and Bandung - that are characterised by different cultural backgrounds, ethnicities, and decision-making processes in the household purchase of electrical appliances. A questionnaire survey method was employed to obtain information on behavioural economics and human psychosocial variables such as attitudes, beliefs and perceived benefits regarding the replacement and purchase of electrical appliances. The results show that refrigerators in Yogyakarta have a longer lifetime than in Bandung. However, in Bandung, air conditioners, electric fans, rice cookers, and water pumps have a longer lifetime than in Yogyakarta. These differences in the lifetime of appliances can be attributed to the cultural differences within the two cities that are reflected in the manner in which people use electrical appliances as well as to their lack of knowledge regarding appliance operation. An analysis of the factors influencing the purchase of appliances indicated that people in Yogyakarta show a greater awareness of the benefits of adopting higher-efficiency appliances than do persons in Bandung. The following suggestions could be implemented to improve the strategy of encouraging the adoption of higher-efficiency appliances: (1) in Yogyakarta, energy labelling could be applied to assist customers in understanding the rate of energy consumption of selected appliances; (2) in Bandung, the store sales staff could be trained to adapt their promotional messages to persuade people to purchase high-efficiency appliances and to promote the adoption of higher-efficiency models; and (3) the price of appliances could

be correlated with the rate of energy consumption, and the total lifetime cost of use should be displayed in the store and included in promotional materials. (C) 2013 Elsevier Ltd. All rights reserved.

C1 [Wijaya, Muhammad Ery; Tezuka, Tetsuo] Kyoto Univ, Grad Sch Energy Sci, Dept Socioenvironm Energy Sci, Sakyo Ku, Kyoto, Japan.

RP Wijaya, ME (reprint author), Kyoto Univ, Grad Sch Energy Sci, Dept Socioenvironm Energy Sci, Sakyo Ku, Yoshida Honmachi, Kyoto, Japan.

EM ery\_wijaya@mail.ugm.ac.id

CR ADB, 2010, PROP LOAN ADM LOAN G

CDI-EMR, 2011, KEY IND IND EN MIN R

CDI-EMR, 2011, HDB EN EC STAT IND

Gaspar R, 2011, ENERG POLICY, V39, P7335, DOI 10.1016/j.enpol.2011.08.057

Ghisi E, 2007, ENERG POLICY, V35, P4107, DOI 10.1016/j.enpol.2007.02.020

Harrington L, 1997, ENERG BUILDINGS, V26, P81, DOI 10.1016/S0378-7788(96)01015-8

Kowsari R, 2011, ENERG POLICY, V39, P7505, DOI 10.1016/j.enpol.2011.06.030

Mahlia TMI, 2005, ENERG POLICY, V33, P53

Mansouri I, 1996, APPL ENERG, V54, P211, DOI 10.1016/0306-2619(96)00001-3

MEMR, 2008, NAT EL MAST PLAN 200

Michael AM, 2012, ENERG POLICY, V45, P33

Mills B, 2010, ENERG POLICY, V38, P814, DOI 10.1016/j.enpol.2009.10.028

O'Doherty J, 2008, APPL ENERG, V85, P650, DOI 10.1016/j.apenergy.2008.01.001

Shimoda Y, 2010, APPL ENERG, V87, P1944, DOI 10.1016/j.apenergy.2009.10.021

SI, 2010, POP CENS 2010

SI, 2012, STRAT DAT 2012

Suryadunata L, 2003, INDONESIA POPULATIO

Vassileva I, 2012, APPL ENERG, V90, P182, DOI 10.1016/j.apenergy.2011.05.031

Wijaya ME, 2012, ZERO CARBON ENERGY K, P56

Yamamoto Y, 2008, ENERG POLICY, V36, P1679, DOI 10.1016/j.enpol.2008.01.022

Young D., 2007, ENERG POLICY, V36, P34

NR 21

TC 8

Z9 8

U1 1

U2 19

PU ELSEVIER SCI LTD

PI OXFORD

PA THE BOULEVARD, LANGFORD LANE, KIDLINGTON, OXFORD OX5 1GB, OXON, ENGLAND

SN 0306-2619

EI 1872-9118

J9 APPL ENERG

J1 Appl. Energy

PD DEC

PY 2013

VL 112

SI SI

BP 981

EP 987

DI 10.1016/j.apenergy.2013.02.036

PG 7

WC Energy & Fuels; Engineering, Chemical

SC Energy & Fuels; Engineering

GA 285FA

UT WOS:000329377800104

DA 2018-05-03

ER

PT J

AU Azevedo, IL

Morgan, MG

Palmer, K

Lave, LB

AF Azevedo, Ines Lima

Morgan, M. Granger

Palmer, Karen

Lave, Lester B.

TI Reducing US Residential Energy Use and CO2 Emissions: How Much, How Soon, and at What Cost?

SO ENVIRONMENTAL SCIENCE & TECHNOLOGY

LA English

DT Article

ID INDIVIDUAL DISCOUNT RATES; GREENHOUSE-GAS EMISSIONS; CLIMATE-CHANGE; SUPPLY CURVES; EFFICIENCY; TECHNOLOGIES; BUILDINGS; DURABLES; BARRIERS; PURCHASE

AB There is growing interest in reducing energy use and emissions of carbon dioxide from the residential sector by deploying cost-effectiveness energy efficiency measures. However, there is still large uncertainty about the magnitude of the reductions that could be achieved by pursuing different energy efficiency measures across the nation. Using detailed estimates of the current inventory and performance of major appliances in U.S. homes, we model the cost, energy, and CO2 emissions reduction if they were replaced with alternatives that consume less energy or emit less CO2. We explore trade-offs between reducing CO2, reducing primary or final energy, or electricity consumption. We explore switching between electricity and direct fuel use, and among fuels. The trade-offs between different energy efficiency policy goals, as well as the environmental metrics used, are important but have been largely unexplored by previous energy modelers and policy-makers. We find that overnight replacement of the full stock of major residential appliances sets an upper bound of just over  $710 \times 10^6$  tonnes/year of CO2 or a 56% reduction from baseline residential emissions. However, a policy designed instead to minimize primary energy consumption instead of CO2 emissions will achieve a 48% reduction in annual carbon dioxide emissions from the nine largest energy consuming residential end-uses. Thus, we explore the uncertainty regarding the main assumptions and different policy goals in a detailed sensitivity analysis.

C1 [Azevedo, Ines Lima; Morgan, M. Granger; Lave, Lester B.] Carnegie Mellon Univ, Dept Engr & Publ Policy, Pittsburgh, PA 15213 USA.

[Palmer, Karen] Resources Future Inc, Washington, DC 20036 USA.

RP Azevedo, IL (reprint author), Carnegie Mellon Univ, Dept Engr & Publ Policy, 5000 Forbes Ave, Pittsburgh, PA 15213 USA.

EM iazevedo@cmu.edu

FU center for Climate and Energy Decision Making [SES-0949710]; Electricity and Environment Program at Resources for the Future

FX We thank Erica Myers for developing the algorithm to infer unit energy consumption and investments and retirements by type of end-use equipment, Conrad Coleman and Pedro Ferreira for programming assistance, and Elisabeth Anne Gilmore for programming assistance on RREEM. We also thank Jay Apt, John Cymbalsky and Paulo Ferrao, and the Carnegie Mellon Electricity Industry Center (CEIC) for thoughtful advice and comments. The work was supported by the center for Climate and Energy Decision Making (SES-0949710), both through a cooperative agreement between the National Science Foundation and Carnegie Mellon University, by the Electricity and Environment Program at Resources for the Future, and a gift to that program from Exelon Corporation.

CR ANDERSON CD, 1982, J CONSUM RES, V9, P163, DOI 10.1086/208909

BLUMSTEIN C, 1995, ENER POLICY, V23, P765, DOI 10.1016/0301-4215(95)00073-R

Bond TC, 2013, J GEOPHYS RES-ATMOS, V118, P5380, DOI 10.1002/jgrd.50171

Brown MA, 1998, ANNU REV ENER ENV, V23, P287, DOI 10.1146/annurev.energy.23.1.287

Brown MA, 2001, ENER POLICY, V29, P1197, DOI 10.1016/S0301-4215(01)00067-2

Brown R., 2008, U S BUILDINGSECTOR E

Brown R. E., 1993, THESIS

Carmichael GR, 2002, ENVIRON SCI TECHNOL, V36, P4707, DOI 10.1021/es011509c

Climate Change, 2007, CONTRIBUTION OF WORK, P996

Crabtree G., ENERGY FUTURE THINK

Dixon RK, 2010, ENER POLICY, V38, P6398, DOI 10.1016/j.enpol.2010.01.038  
EIA, 2011, ANNUAL ENERGY OUTLOO  
Annual Energy Outlook, 2008, ANNUAL ENERGY OUTLOO  
GATELY D, 1980, BELL J ECON, V11, P373, DOI 10.2307/3003422  
Gellings C., 2006, ELECT J, V19, P55  
Gillingham K., 2010, ANNU REV RESOUR ECON, V1, P597  
Gillingham K, 2006, ANNU REV ENV RESOUR, V31, P161, DOI 10.1146/annurev.energy.31.020105.100157  
Golove W.H., 1996, MARKET BARRIERS TO E  
Greening LA, 2000, ENER POLICY, V28, P389  
HAUSMAN JA, 1979, BELL J ECON, V10, P33, DOI 10.2307/3003318  
Howarth RW, 2011, CLIMATIC CHANGE, V106, P679, DOI 10.1007/s10584-011-0061-5  
Huntington H. G., 2011, ENERGY J, V32, P7, DOI [10.5547/ISSN0195-6574-EJ-Vol32-SI1-2, DOI 10.5547/ISSN0195-6574-EJ-VOL32-SI1-2]  
Interlaboratory Working Group, 1997, ORNL 444  
Interlaboratory Working Group, 2000, ORNL CON 476  
Interagency Working Group on Social Cost of Carbon, 2010, TECHNICAL SUPPORT DO  
JACKSON T, 1995, ENER POLICY, V23, P117, DOI 10.1016/0301-4215(95)91416-A  
Khazzoom J. D., 1996, ENERGY J, V14, P21  
Koomey J. G., 1991, LBL 20477  
Lovins A. B., 2005, ENCYCL ENERGY, V2, P383  
[Anonymous], 2007, REDUCING THE US GREE  
Meier A., 1982, LBL 14686  
MEIER AK, 1983, ENERGY, V8, P957, DOI 10.1016/0360-5442(83)90094-4  
Morgan MG, 2006, CLIMATIC CHANGE, V75, P195, DOI 10.1007/s10584-005-9025-y  
Nadel S., 2004, THE TECHNICAL ECONOM  
[Anonymous], 1992, POLICY IMPLICATIONS  
[Anonymous], 2010, PROSPECTS FOR ENERGY, P329  
[Anonymous], 2010, THE HIDDEN COST OF E, P506  
[Anonymous], 1991, OTA 0 489  
Pacala S, 2004, SCIENCE, V305, P968, DOI 10.1126/science.1100103  
ROSENFELD A, 1993, CONTEMP POLICY ISSUE, V11, P45, DOI 10.1111/j.1465-7287.1993.tb00370.x  
Rosenfeld A., 1991, LBL 31700  
Rosenfeld AH, 1999, ANNU REV ENER ENV, V24, P33, DOI 10.1146/annurev.energy.24.1.33  
Rubin ES, 1992, SCIENCE, V257, P261  
Smith V. K., 2010, ENVIRON RESOUR ECON, V46, P17  
Stoft S., 1995, PROGRAM ON WORKABLE  
Streets DG, 2001, SCIENCE, V294, P1835, DOI 10.1126/science.1065226  
[Anonymous], 1997, POLICIES AND MEASURE  
Thomas B. A., ECOL ECON IN PRESS  
Urge-Vorsatz D, 2009, ENER EFFIC, V2, P293, DOI 10.1007/s12053-009-9051-0  
Wigley TML, 2011, CLIMATIC CHANGE, V108, P601, DOI 10.1007/s10584-011-0217-3

NR 50  
TC 8  
Z9 8  
U1 2  
U2 60  
PU AMER CHEMICAL SOC  
PI WASHINGTON  
PA 1155 16TH ST, NW, WASHINGTON, DC 20036 USA  
SN 0013-936X  
J9 ENVIRON SCI TECHNOL  
JI Environ. Sci. Technol.  
PD MAR 19  
PY 2013  
VL 47  
IS 6  
BP 2502  
EP 2511

DI 10.1021/es303688k

PG 10

WC Engineering, Environmental; Environmental Sciences

SC Engineering; Environmental Sciences & Ecology

GA 112LP

UT WOS:000316594000010

DA 2018-05-03

ER

PT J

AU Bruhns, H

Wyatt, P

AF Bruhns, Harry

Wyatt, Peter

TI A data framework for measuring the energy consumption of the non-domestic building stock

SO BUILDING RESEARCH AND INFORMATION

LA English

DT Article

DE building stock; consumption; data; database; energy statistics; energy; evidence-based policy; framework

ID ENGLAND; WALES; CLASSIFICATION; MODEL

AB The transition to a low-carbon economy urgently demands better information on the drivers of energy consumption. UK government policy has prioritized energy efficiency in the built stock as a means of carbon reduction, but the sector is historically information poor, particularly the non-domestic building stock. This paper presents the results of a pilot study that investigated whether and how property and energy consumption data might be combined for non-domestic energy analysis. These data were combined in a 'Non-Domestic Energy Efficiency Database' to describe the location and physical attributes of each property and its energy consumption. The aim was to support the generation of a range of energy-efficiency statistics for the industrial, commercial and institutional sectors of the non-domestic building stock, and to provide robust evidence for national energy-efficiency and carbon-reduction policy development and monitoring. The work has brought together non-domestic energy data, property data and mapping in a 'data framework' for the first time. The results show what is possible when these data are integrated and the associated difficulties. A data framework offers the potential to inform energy-efficiency policy formation and to support its monitoring at a level of detail not previously possible.

C1 [Bruhns, Harry] UCL, Energy Inst, London WC1H OHY, England.

[Wyatt, Peter] Univ Reading, Henley Business Sch, Sch Real Estate & Planning, Reading RG6 6AW, Berks, England.

RP Bruhns, H (reprint author), UCL, Energy Inst, Cent House, 14 Upper Woburn Pl, London WC1H OHY, England.

EM h.bruhns@ucl.ac.uk; p.wyatt@reading.ac.uk

CR Brown FE, 2000, ENVIRON PLANN B, V27, P11, DOI 10.1068/b2571

Brown N, 2010, BUILD RES INF, V38, P80, DOI 10.1080/09613210903374788

Bruhns H, 2000, ENVIRON PLANN B, V27, P33, DOI 10.1068/bst6

BRUHNS H, 2008, IE ECB 08

BRUHNS H, 2006, COBRA C LOND US ROY

Bruhns HR, 2000, ENVIRON PLANN B, V27, P641, DOI 10.1068/bst08

\*CARB TRUST, 2003, EN CONS GUID CARB TR, V19

CIBSE, 2008, 46 CIBSE

Greenleaf J., 2008, PECSGB073903 EC

Mortimer ND, 2000, ENVIRON PLANN B, V27, P709, DOI 10.1068/b2573

\*NAT GRID PLC, 2007, GAS DEM FOR METH

NEFFENDORF H, 2009, ASS GEOGR INF C LOND

Penman JM, 2000, ENVIRON PLANN B, V27, P1, DOI 10.1068/bst1

Pout CH, 2000, ENVIRON PLANN B, V27, P721, DOI 10.1068/bst12

Rickaby PA, 2000, ENVIRON PLANN B, V27, P695, DOI 10.1068/bst10

Steadman P, 2000, ENVIRON PLANN B, V27, P73, DOI 10.1068/bst7

Steadman P, 2000, ENVIRON PLANN B, V27, P3, DOI 10.1068/bst2

NR 17  
TC 8  
Z9 8  
U1 1  
U2 10  
PU TAYLOR & FRANCIS LTD  
PI ABINGDON  
PA 4 PARK SQUARE, MILTON PARK, ABINGDON OX14 4RN, OXON, ENGLAND  
SN 0961-3218  
J9 BUILD RES INF  
JI Build. Res. Informat.  
PY 2011  
VL 39  
IS 3  
BP 211  
EP 226  
DI 10.1080/09613218.2011.559704  
PG 16  
WC Construction & Building Technology  
SC Construction & Building Technology  
GA 748QJ  
UT WOS:000289405200002  
DA 2018-05-03  
ER

PT J  
AU Musti, S  
Kortum, K  
Kockelman, KM  
AF Musti, Sashank  
Kortum, Katherine  
Kockelman, Kara M.

TI Household energy use and travel: Opportunities for behavioral change  
SO TRANSPORTATION RESEARCH PART D-TRANSPORT AND ENVIRONMENT  
LA English  
DT Article

DE Household energy consumption; Transport energy; Climate change;  
Greenhouse gas emissions

AB This study examines personal travel decisions and residents' opinions on energy policy options in the Austin metropolitan area. The vast majority of respondents recognized global warming as a problem, and most agreed that lifestyle changes are needed to combat climate change. Many also believe that climate change can be combated by application of stricter policies in the areas of vehicle technology, fuel economy, and building design. Results of the study illuminate the importance of home-zone attributes on vehicle ownership, vehicle miles, and emissions. Most households agree that energy regulations should be pursued to curb global climate change, and most prefer caps on consumption over taxation. The results suggest that substantial US energy and greenhouse gas savings are likely to come from vehicle fuel-economy regulation, rebates on relatively fuel-efficient vehicle purchases, caps on maximum household energy use, and long-term behavioral shifts. (C) 2010 Elsevier Ltd. All rights reserved.

C1 [Kockelman, Kara M.] Univ Texas Austin, Dept Civil Architectural & Environm Engr, Austin, TX 78712 USA.

[Musti, Sashank] Cambridge Systemat, Oakland, CA 94607 USA.

RP Kockelman, KM (reprint author), Univ Texas Austin, Dept Civil Architectural & Environm Engr, 6-9 E Cockrell Jr Hall, Austin, TX 78712 USA.

EM kcockelm@mail.utexas.edu

FU Southwest Region University Transportation Center [169202]

FX This research was financially supported by the Southwest Region University Transportation Center's Project # 169202. The survey instrument for this paper was created and many responses were obtained



by graduate students at the University of Texas at Austin. We are indebted to Jason Lemp, Melissa Thompson, Siva Kakaraparathi and Sumala Tirumalachetty for their assistance in the survey process. Ms. Annette Perrone was instrumental in obtaining survey permissions and other administrative activities. We appreciate the detailed editing recommendations of Prof. Ken Button and the valuable comments of several anonymous reviewers.

CR Bannon B, 2007, AM EVALUATION POLICI  
 CLAYTON M, 2007, CHRISTIAN SCI M 0307  
 Curry Thomas E., 2007, SURVEY PUBLIC ATTITU  
 \*EN INF AG, 2007, DOEEIA0573 EN INF AG  
 Garling T, 2003, TRANSPORTATION, V30, P1, DOI 10.1023/A:1021230223001  
 KERKHOF AC, 2008, ECOLOGICAL EC, P318  
 KOCKELMAN K, 2009, GHG EMISSIONS CONTRO  
 Potoglou D, 2007, TRANSPORT RES D-TR E, V12, P264, DOI 10.1016/j.trd.2007.03.001  
 Puller SL, 1999, ENERG ECON, V21, P37, DOI 10.1016/S0140-9883(98)00006-1  
 SAJAIA Z, 2005, BIOPROBIT STATE MODU  
 Searchinger T, 2008, SCIENCE, V319, P1238, DOI 10.1126/science.1151861  
 Small KA, 2007, ENERG J, V28, P25  
 Smith C., 2009, TRANSP RES BOARDS NA  
 NR 13  
 TC 8  
 Z9 9  
 U1 0  
 U2 6  
 PU PERGAMON-ELSEVIER SCIENCE LTD  
 PI OXFORD  
 PA THE BOULEVARD, LANGFORD LANE, KIDLINGTON, OXFORD OX5 1GB, ENGLAND  
 SN 1361-9209  
 J9 TRANSPORT RES D-TR E  
 JI Transport. Res. Part D-Transport. Environ.  
 PD JAN  
 PY 2011  
 VL 16  
 IS 1  
 BP 49  
 EP 56  
 DI 10.1016/j.trd.2010.07.005  
 PG 8  
 WC Environmental Studies; Transportation; Transportation Science &  
 Technology  
 SC Environmental Sciences & Ecology; Transportation  
 GA 676DG  
 UT WOS:000283889700007  
 DA 2018-05-03  
 ER  
  
 PT J  
 AU Lv, SL  
 Wu, Y  
 AF Lv Shilei  
 Wu Yong  
 TI Target-oriented obstacle analysis by PESTEL modeling of energy  
 efficiency retrofit for existing residential buildings in China's  
 northern heating region  
 SO ENERGY POLICY  
 LA English  
 DT Article

DE EERFERB; Obstacle; PESTEL

AB According to the "Comprehensive Work Program of Energy Efficiency and Emission Reduction" of the Chinese government, during the period of the "11th Five-Year Plan", 1.5 x 10(8) m(2) of existing residential buildings in China's northern heating region are to be retrofitted for energy efficiency. However, at present, this "Energy Efficiency Retrofit for Existing Residential Buildings" (EERFERB) faces many obstacles. Under the current working and market system, both the central and local governments and the energy supply companies can not push on this work smoothly. Using both the results of the annual national special inspection of building energy efficiency and some case analyses, this paper examines the necessity for energy efficiency retrofit, along with the relationships among the various Political, Economic, Social, Technological, Environmental and Legal (PESTEL) factors affecting it. Furthermore, organizational, financial and technical support systems are explored to promote the development of retrofit. Finally, some primary principles to be followed toward the implementation of EERFERB are suggested. (C) 2008 Elsevier Ltd. All rights reserved.

C1 [Lv Shilei] Tianjin Univ, Sch Environm Sci & Technol, Tianjin 300072, Peoples R China.

[Wu Yong] Minist Housing & Urban Rural Dev Peoples Republ C, Dept Sci & Technol, Beijing 100835, Peoples R China.

RP Lv, SL (reprint author), Tianjin Univ, Sch Environm Sci & Technol, Tianjin 300072, Peoples R China.

EM lvshilei@tju.edu.cn

CR \*OFF NAT EN LEAD G, 2007, REP RES IMP ISS EN E

SHILEI L, 2007, HEATING VENTILATING, V9, P20

XU XL, 2007, HEATING VENTILATING, V9, P29

XU XL, 2008, CONSTRUCTION SCI TEC, V7, P33

NR 4

TC 8

Z9 8

U1 4

U2 39

PU ELSEVIER SCI LTD

PI OXFORD

PA THE BOULEVARD, LANGFORD LANE, KIDLINGTON, OXFORD OX5 1GB, OXON, ENGLAND

SN 0301-4215

J9 ENERG POLICY

JI Energy Policy

PD JUN

PY 2009

VL 37

IS 6

BP 2098

EP 2101

DI 10.1016/j.enpol.2008.11.039

PG 4

WC Economics; Energy & Fuels; Environmental Sciences; Environmental Studies

SC Business & Economics; Energy & Fuels; Environmental Sciences & Ecology

GA 448AK

UT WOS:000266233300009

DA 2018-05-03

ER

PT J

AU Xu, MJ

Hu, ZG

Wu, JY

Zhou, YH

AF Xu, Minjie

Hu, Zhaoguang

Wu, Junyong

Zhou, Yuhui

TI A hybrid society model for simulating residential electricity

consumption

SO INTERNATIONAL JOURNAL OF ELECTRICAL POWER & ENERGY SYSTEMS

LA English

DT Article

DE Residential electricity consumption; Multi-agent systems (MAS); Power price policy; Electricity saving; Social influence model

ID FUNCTIONAL FORMS; DEMAND; PATTERNS; DESIGN

AB In this paper, a hybrid social model of econometric model and social influence model is proposed for evaluating the influence of pricing policy and public education policy on residential habit of electricity using in power resources management. And, a hybrid society simulation platform based on the proposed model, called residential electricity consumption multi-agent systems (RECMAS), is designed for simulating residential electricity consumption by multi-agent system. RECMAS is composed of consumer agent, power supplier agent, and policy maker agent. It provides the policy makers with a useful tool to evaluate power price policies and public education campaigns in different scenarios. According to an influenced diffusion mechanism, RECMAS can simulate the residential electricity demand-supply chain and analyze impacts of the factors on residential electricity consumption. Finally, the proposed method is used to simulate urban residential electricity consumption in China. (C) 2008 Elsevier Ltd. All rights reserved.

C1 [Xu, Minjie; Hu, Zhaoguang] State Power Econ Res Inst, Beijing 100761, Peoples R China.

[Xu, Minjie; Wu, Junyong; Zhou, Yuhui] Beijing Jiaotong Univ, Sch Elect Engr, Beijing, Peoples R China.

RP Xu, MJ (reprint author), State Power Econ Res Inst, Integrated Bldg Room 518,1 Ertiao,Baiguang Rd, Beijing 100761, Peoples R China.

EM 05117299@bjtu.edu.cn

CR Athanasiadis IN, 2005, SIMUL-T SOC MOD SIM, V81, P175, DOI 10.1177/0037549705053172

Dintchev OD, 2000, ENG SCI EDUC J, V9, P53, DOI 10.1049/esej:20000201

HESSINGCOUVRET E, 2002, WIN MODEL VALUE SYST

Houri A, 2005, INT J ENERG RES, V29, P755, DOI 10.1002/er.1086

JENNING NR, 2001, P 10 EUR WORKSH MULT

LOPEZ A, 2002, J SOCIO-ECON, V31, P423

Moholkar A., 2004, POW SYST C EXP IEEE, V2, P1030

Paatero J., 2005, INT J ENERG RES, V30, P273

Rivkin JW, 2003, MANAGE SCI, V49, P290, DOI 10.1287/mnsc.49.3.290.12740

SHI ZZ, 2003, MAGE MULTIAGENT ENV

SONG W, 2006, ELECT POWER, V39, P66

Vringer K, 2007, ENERG POLICY, V35, P553, DOI 10.1016/j.enpol.2005.12.025

Weiss G., 1999, MULTIAGENT SYSTEMS M

Wooldridge M, 2000, AUTON AGENT MULTI-AG, V3, P285, DOI 10.1023/A:1010071910869

Xiao N, 2007, ENERG ECON, V29, P158, DOI 10.1016/j.eneco.2006.02.005

Yuan Jia-hai, 2005, Power System Technology, V29, P47

Zarnikau J, 2003, ENERG ECON, V25, P603, DOI 10.1016/S0140-9883(03)00043-4

NR 17

TC 8

Z9 10

U1 0

U2 8

PU ELSEVIER SCI LTD

PI OXFORD

PA THE BOULEVARD, LANGFORD LANE, KIDLINGTON, OXFORD OX5 1GB, OXON, ENGLAND

SN 0142-0615

J9 INT J ELEC POWER

JI Int. J. Electr. Power Energy Syst.

PD DEC

PY 2008

VL 30

IS 10

BP 569

EP 574

DI 10.1016/j.ijepes.2008.08.005

PG 6

WC Engineering, Electrical & Electronic

SC Engineering

GA 386CL

UT WOS:000261859800002

DA 2018-05-03

ER

PT J

AU Zadeh, SMS

AF Zadeh, S. M. Sadegh

TI An energy efficiency plan for the Iranian building sub-sector

SO ENERGY POLICY

LA English

DT Article

DE energy efficiency; integrated energy network; least cost planning

AB The objective of this paper is to develop a 25-year least cost plan for energy management in the Iranian building sub-sector. For this purpose, an energy flow optimization from the point where the final energy is delivered to consumers, until the useful energy and energy services point is investigated. This will help to select the most economically feasible technologies as well as energy carriers considering all technical and social constraints. Based on the optimization results, absorption cooling for the regions where natural gas network is available, grades A and B evaporative coolers and air conditioners for those areas where there is no gas service, gas fired heating systems, wall insulation, double-glazed windows, equipments and appliances with highest energy labelling grade and compact and non-compact fluorescent lamps are among the selections. The results of the sensitivity analysis indicates that if the cost of natural gas network development to the regions where there is no gas will result in the tripling rate of the actual cost of the natural gas, in those areas, the priority should be still given to the consumption of gas. The proposed energy efficiency plan results in 27%, 54% and 10% saving in energy consumption, energy cost and investment cost, respectively. (c) 2006 Elsevier Ltd. All rights reserved.

C1 Shahed Univ, Fac Engr, Tehran 1417953836, Iran.

RP Zadeh, SMS (reprint author), Shahed Univ, Fac Engr, POB 15875-5794, Beinning Tehran Qom Free Way, Tehran 1417953836, Iran.

EM sadeghzadeh@shahed.ac.ir

CR \*AM SOC HEAT REFR, 1997, ASHR HDB

\*EN EFF OFF IR MIN, 2003, EN EFF LONG TERM PLA

\*EN EFF OFF IR MIN, 2004, ED7420010 IR MIN EN

\*EN ENV, 1995, RAS92071 PACEE UN NA

\*EN PLANN OFF IR M, 2003, EN BAL

\*ISIRI, 2004, 60162 ISIRI

\*ISIRI, 2004, 7342 ISIRI

\*ISIRI, 2004, 49102 ISIRI

\*ISIRI, 2004, 48532 ISIRI

\*ISIRI, 2004, 7341 ISIRI

\*ISIRI, 2004, 43352 ISIRI

\*ISIRI, 2004, 15632 ISIRI

\*ISIRI, 2004, 34772 ISIRI

\*ISIRI, 2004, 36782 ISIRI

MALEKZADEH GR, 1994, HDB AIR CONDITIONING

Sillion F. X., 1994, RADIOSITY GLOBAL ILL

\*STAT CTR IR, 2003, IR STAT YB

Swisher J. N., 1997, TOOLS METHODS INTEGR

TABATABAEI SM, 2003, BUILDING UTILITY CAL

\*WHIT TOW, 2004, VER MOD RES BUILD SU

NR 20

TC 8

Z9 8

U1 0

U2 0

PU ELSEVIER SCI LTD  
PI OXFORD  
PA THE BOULEVARD, LANGFORD LANE, KIDLINGTON, OXFORD OX5 1GB, OXON, ENGLAND  
SN 0301-4215  
J9 ENERG POLICY  
JI Energy Policy  
PD FEB  
PY 2007  
VL 35  
IS 2  
BP 1164  
EP 1171  
DI 10.1016/j.enpol.2006.03.008  
PG 8  
WC Economics; Energy & Fuels; Environmental Sciences; Environmental Studies  
SC Business & Economics; Energy & Fuels; Environmental Sciences & Ecology  
GA 135RF  
UT WOS:000244170000034  
DA 2018-05-03  
ER

PT J

AU Paudel, S  
Elmitri, M  
Couturier, S  
Nguyen, PH  
Kamphuis, R  
LacARRIERE, B  
Le Corre, O

AF Paudel, Subodh  
Elmitri, Mohamed  
Couturier, Stephane  
Nguyen, Phuong H.  
Kamphuis, Rene  
LacARRIERE, Bruno  
Le Corre, Olivier

TI A relevant data selection method for energy consumption prediction of  
low energy building based on support vector machine

SO ENERGY AND BUILDINGS

LA English

DT Article

DE Building energy consumption; Prediction; Low energy building; Support  
vector machine; Online and offline learning

ID ARTIFICIAL NEURAL-NETWORKS; LOAD; MODEL; OPTIMIZATION; PERFORMANCE;  
SIMILARITY; SYSTEM

AB Low energy buildings (LEBs) are being considered as a promising solution for the built environment to satisfy high-energy efficiency standards. The technology is based on lowering the overall heat transmission coefficient value (U-value) of the buildings envelope and increasing a heat capacity thus creating a higher thermal inertia. However, LEB introduces a large time constant compared to conventional building due to which it slows the rate of heat transfer between interior of building and outdoor environment and alters the indoor climate regardless of sudden changes in climatic conditions. Therefore, it is challenging to estimate and predict thermal energy demand for such LEBs.

This work focuses on artificial intelligence (AI) model to predict energy consumption of LEB. Two kinds of AI modeling approaches: "all data" and "relevant data" are considered. The "all data" uses all available training data and "relevant data" uses a small representative day dataset and addresses the complexity of building non-linear dynamics by introducing past day climatic impacts behavior. This extraction is based on dynamic time warping pattern recognition methods. The case study consists of a French residential LEB. The numerical results showed that "relevant data" modeling approach that relies on small

- representative data selection has higher accuracy ( $R^2=0.98$ ; RMSE = 3.4) than "all data" modeling approach ( $R^2 = 0.93$ ; RMSE = 7.1) to predict heating energy load. (C) 2016 Elsevier B.V. All rights reserved.
- C1 [Paudel, Subodh; Lacarriere, Bruno; Le Corre, Olivier] Ecole Mines Nantes, GEPEA, CNRS, UMR 6144, Dept Energy Syst & Environm, Nantes, France.  
 [Paudel, Subodh; Elmitri, Mohamed; Couturier, Stephane] Veolia Rech & Innovat VERI, Limay, France.  
 [Paudel, Subodh; Nguyen, Phuong H.; Kamphuis, Rene] Eindhoven Univ Technol, Dept Elect Engrn, Eindhoven, Netherlands.
- RP Le Corre, O (reprint author), Ecole Mines Nantes, GEPEA, CNRS, UMR 6144, Dept Energy Syst & Environm, Nantes, France.  
 EM Olivier.Lecorre@mines-nantes.fr  
 RI Nguyen, Phuong/C-6762-2011  
 OI Nguyen, Phuong/0000-0003-1124-2710  
 FU Ecole des Mines de Nantes; Eindhoven University of Technology; Veolia Recherche et Innovation (VERI)
- FX This research has been done in collaboration with Ecole des Mines de Nantes, Eindhoven University of Technology and Veolia Recherche et Innovation (VERI), funded through Erasmus Mundus Joint doctoral programme SELECT+, the support of which is gratefully acknowledged.
- CR Box George E. P., 2008, TIME SERIES ANAL FOR  
 Chang C.-C., 2001, TECHNICAL REPORT  
 Chen Y, 2010, IEEE T POWER SYST, V25, P322, DOI 10.1109/TPWRS.2009.2030426  
 Citherlet S., 2001, THESIS  
 Crawley DB, 2001, ENERGBUILDINGS, V33, P319, DOI 10.1016/S0378-7788(00)00114-6  
 D'Oca S, 2015, ENERGBUILDINGS, V88, P395, DOI 10.1016/j.enbuild.2014.11.065  
 De Rosa M, 2014, APPL ENERGB, V128, P217, DOI 10.1016/j.apenergy.2014.04.067  
 Dong B, 2005, ENERGBUILDINGS, V37, P545, DOI 10.1016/j.enbuild.2004.09.009  
 Dong-xing Duan, 2009, Proceedings of the 2009 Second International Workshop on Computer Science and Engineering (WCSE 2009), P394, DOI 10.1109/WCSE.2009.695  
 Du KL, 2014, NEURAL NETWORKS STAT  
 Gaitani N, 2010, APPL ENERGB, V87, P2079, DOI 10.1016/j.apenergy.2009.12.007  
 Gao XF, 2014, ENERGBUILDINGS, V84, P607, DOI 10.1016/j.enbuild.2014.08.030  
 Ghanbari A, 2010, INT CONF COMPUT AUTO, P407, DOI 10.1109/ICCAE.2010.5451228  
 Gibbons J. D., 2003, NONPARAMETRIC STAT I  
 Grzenda M., 2006, ADV NATURAL COMPUTAT, P131  
 He Y.-J., 2005, P 4 INT C MACH LEARN  
 Iglesias F, 2013, ENERGIES, V6, P579, DOI 10.3390/en6020579  
 Jain A., 2009, IEEE POW EN SOC GEN, P1, DOI DOI 10.1109/ICPWS.2009.5442673  
 Jain A, 2011, LECT NOTES COMPUT SC, V7076, P626  
 Joachims T, 1999, ADVANCES IN KERNEL METHODS, P169  
 Keogh E, 2005, KNOWL INF SYST, V7, P358, DOI 10.1007/s10115-004-0154-9  
 Lam JC, 2008, ENERGBUILDINGS, V40, P828, DOI 10.1016/j.enbuild.2007.06.001  
 Li Q, 2009, ENERGBUILDINGS, V50, P90, DOI 10.1016/j.enconman.2008.08.033  
 Li XL, 2010, IEEE T IND ELECTRON, V57, P3639, DOI 10.1109/TIE.2009.2027926  
 Liang X, 2016, BUILD ENVIRON, V102, P179, DOI 10.1016/j.buildenv.2016.03.027  
 MALLAT SG, 1989, IEEE T PATTERN ANAL, V11, P674, DOI 10.1109/34.192463  
 Manda P, 2006, INT J ELEC POWER, V28, P367, DOI 10.1016/j.ijepes.2005.12.007  
 Marin FJ, 2002, IEE P-GENER TRANSM D, V149, P121, DOI 10.1049/ip-gtd:20020224  
 Mu Q., 2010, AS PAC POW EN C 28 3  
 Nazarko J., 2005, IEEE POW TECH C 27 3, P1  
 Pasila F., 2008, IEEE WORLD C COMP IN, P1098  
 Paudel S., 2015, P ECOS 2015 28 INT C  
 Paudel S, 2014, ENERGBUILDINGS, V70, P81, DOI 10.1016/j.enbuild.2013.11.051  
 Pecourt A., 2015, INERTIE BATIMENTS PA  
 Pelckmans K, 2002, LS SVMLAB MATLAB C T  
 Ren XX, 2015, BUILD ENVIRON, V89, P1, DOI 10.1016/j.buildenv.2015.02.009  
 Roldan-Blay C, 2013, ENERGBUILDINGS, V60, P38, DOI 10.1016/j.enbuild.2012.12.009  
 Santamouris M, 2007, ENERGBUILDINGS, V39, P45, DOI 10.1016/j.enbuild.2006.04.018  
 Senjyu T, 2001, ELECTR POW COMPO SYS, V29, P939, DOI 10.1080/15325000152646541

Sun CY, 2008, SOFT COMPUT, V12, P633, DOI 10.1007/s00500-007-0252-1  
 Sun W, 2008, ICNC 2008: FOURTH INTERNATIONAL CONFERENCE ON NATURAL COMPUTATION, VOL 2, PROCEEDINGS, P300, DOI 10.1109/ICNC.2008.432  
 Tafreshi SMM, 2007, 2007 CONFERENCE PROCEEDINGS IPEC, VOLS 1-3, P1377  
 Underwood C.P., 2004, MODELING METHODS ENE  
 Widrow B, 2003, NEURAL NETWORKS, V16, P735, DOI 10.1016/S0893-6080(03)00126-6  
 Yadav V, 2010, INT CONF COMPUT AUTO, P186, DOI 10.1109/ICCAE.2010.5451972  
 Yokoyama R, 2009, ENER CONVERS MANAGE, V50, P319, DOI 10.1016/j.enconman.2008.09.017  
 Zhao HX, 2012, RENEW SUST ENER REV, V16, P3586, DOI 10.1016/j.rser.2012.02.049

NR 47

TC 7

Z9 7

U1 0

U2 19

PU ELSEVIER SCIENCE SA

PI LAUSANNE

PA PO BOX 564, 1001 LAUSANNE, SWITZERLAND

SN 0378-7788

EI 1872-6178

J9 ENER BUILDINGS

J1 Energy Build.

PD MAR 1

PY 2017

VL 138

BP 240

EP 256

DI 10.1016/j.enbuild.2016.11.009

PG 17

WC Construction & Building Technology; Energy & Fuels; Engineering, Civil

SC Construction & Building Technology; Energy & Fuels; Engineering

GA EK6UL

UT WOS:000394061200022

DA 2018-05-03

ER

PT J

AU Eleftheriadis, S

Mumovic, D

Greening, P

AF Eleftheriadis, Stathis

Mumovic, Dejan

Greening, Paul

TI Life cycle energy efficiency in building structures: A review of current developments and future outlooks based on BIM capabilities

SO RENEWABLE & SUSTAINABLE ENERGY REVIEWS

LA English

DT Review

DE BIM; LCA; Energy efficiency; Sustainable structures; Building systems

ID EMBODIED ENERGY; OFFICE BUILDINGS; THERMAL MASS; ENVIRONMENTAL ASSESSMENT; INFORMATION MODEL; COST ESTIMATION; DESIGN; CONSTRUCTION; CONCRETE; OPTIMIZATION

AB The continuous developments of Building Information Modelling.(BIM) in Architecture, Engineering and Construction (AEC) industry supported by the advancements in material resourcing and construction processes could offer engineers the essential decision-making procedures to leverage the raising demands for sustainable structural designs. This article brings together the theory of Life Cycle Assessment (LCA) and the capabilities of BIM to survey the current developments in the energy efficiency of structural systems. In addition, the article explores the engineering dimensions of common decision-making procedures within BIM systems including optimisation methods, buildability and safety constraints and

code compliance limitations. The research presents critical expositions in both engineering and sustainable energy domains. The article then argues that future innovations in the sustainable decision making of buildings' structures would require BIM-integrated workflows in order to facilitate the conflicting nature of both energy efficient and engineering performance indexes. Finally, the study puts forward a series of research guidelines for a consolidated decision paradigm that utilises the capabilities of BIM within the engineering and sustainable energy domains in a synergistic manner. (C) 2016 Elsevier Ltd. All rights reserved.

- C1 [Eleftheriadis, Stathis; Mumovic, Dejan] UCL, UCL Inst Environm Design & Engr, London WC1H 0NN, England.  
 [Greening, Paul] Coventry Univ, Fac Engr Environm & Comp, Coventry CV1 5FB, W Midlands, England.  
 [Eleftheriadis, Stathis] Price & Myers Consulting Engineers, 37 Alfred Pl, London WC1E 7DP, England.  
 RP Eleftheriadis, S (reprint author), Price & Myers Consulting Engineers, 37 Alfred Pl, London WC1E 7DP, England.  
 EM stathiseleftheriadis@gmail.com  
 OI Eleftheriadis, Stathis/0000-0002-8160-3270  
 FU Engineering and Physical Sciences Research Council (EPSRC); Price & Myers LLP via the UCL EngD Centre [EP/G037159/1]  
 FX This research has been made possible through funding provided by the Engineering and Physical Sciences Research Council (EPSRC) and from Price & Myers LLP via the UCL EngD Centre (Grant number: EP/G037159/1) in Virtual Environments, Imaging and Visualisation and this is gratefully acknowledged here.
- CR Ahn KU, 2014, ENER BUILDINGS, V68, P671, DOI 10.1016/j.enbuild.2013.08.063  
 Ajayi SO, 2015, INT J SUSTAIN BUILD  
 Akbarnezhad A, 2014, AUTOMAT CONSTR, V37, P131, DOI 10.1016/j.autcon.2013.10.017  
 Ali NBH, 2009, ENG STRUCT, V31, P2766, DOI 10.1016/j.engstruct.2009.07.004  
 Alwan Zaid, 2014, Structural Survey, V32, P49, DOI 10.1108/SS-01-2013-0012  
 Anderson John E, 2009, Structural Engineering International, V19, P283, DOI 10.2749/101686609788957946  
 Anderson JE, 2015, RENEW SUST ENER REV, V44, P149, DOI 10.1016/j.rser.2014.12.027  
 Arayici Y, 2011, AUTOMAT CONSTR, V20, P189, DOI 10.1016/j.autcon.2010.09.016  
 Attia S, 2013, ENER BUILDINGS, V60, P110, DOI 10.1016/j.enbuild.2013.01.016  
 Azhar S, 2011, AUTOMAT CONSTR, V20, P217, DOI 10.1016/j.autcon.2010.09.019  
 Basbagill J, 2013, BUILD ENVIRON, V60, P81, DOI 10.1016/j.buildenv.2012.11.009  
 Beach TH, 2013, P 24 INT C DEXA PRAG, P366  
 Bertin B, 2012, EDBT 12  
 BSI, 2010, COSNTR BUS CAS BUILD  
 Cabinet Office, 2011, GOV COSNTR STRAT  
 Cemesova A, 2012, PC PROD PROC MOD ECP  
 Chen TY, 2001, ENERGY, V26, P323, DOI 10.1016/S0360-5442(01)00006-8  
 Cheung FKT, 2012, AUTOMAT CONSTR, V27, P67, DOI 10.1016/j.autcon.2012.05.008  
 Chi HL, 2015, ARCH COMPUT METHOD E, V22, P135, DOI 10.1007/s11831-014-9127-7  
 Cho YS, 2014, COMPUT-AIDED CIV INF, V29, P47, DOI 10.1111/j.1467-8667.2012.00794.x  
 Cole RJ, 1996, BUILD ENVIRON, V31, P307, DOI 10.1016/0360-1323(96)00017-0  
 Curry E, 2013, ADV ENG INFORM, V27, P206, DOI 10.1016/j.aei.2012.10.003  
 Danatzko JM, 2011, PRACTICE PERIODICALS, V16, P186, DOI DOI 10.1061/(ASCE)SC.1943-5576.0000095  
 Dawood Saad, 2009, Proceedings of the 2009 Winter Simulation Conference (WSC 2009), P2653, DOI 10.1109/WSC.2009.5429263  
 Diaz J., 2014, COMPUTING CIVIL BUIL, P283  
 Dimoudi A, 2008, RESOUR CONSERV RECY, V53, P86, DOI 10.1016/j.resconrec.2008.09.008  
 Ding G. K. C., 2004, DEV MULTICRITERIA AP  
 Ding GKC, 2008, J ENVIRON MANAGE, V86, P451, DOI 10.1016/j.jenvman.2006.12.025  
 Ding LY, 2014, AUTOMAT CONSTR, V46, P82, DOI 10.1016/j.autcon.2014.04.009  
 Dixit MK, 2010, ENER BUILDINGS, V42, P1238, DOI 10.1016/j.enbuild.2010.02.016  
 Dadoo A, 2012, APPL ENER, V92, P462, DOI 10.1016/j.apenergy.2011.11.017  
 Dossick CS, 2010, J CONSTR ENG M ASCE, V136, P459, DOI 10.1061/(ASCE)CO.1943-7862.0000109  
 Eguaras-Martinez M, 2014, APPL ENER, V114, P475, DOI 10.1016/j.apenergy.2013.09.047  
 Eleftheriadis S, 2015, P ISARC OUL FINL  
 Eleftheriadis S, 2016, P SEMC CAPTOWN S AFR



- Faghihi V, 2014, EXPERT SYST APPL, V41, P7565, DOI 10.1016/j.eswa.2014.05.047
- Fiala C, 2007, ENV BASED OPTIMIZATI, P416
- Finnveden G, 2009, J ENVIRON MANAGE, V91, P1, DOI 10.1016/j.jenvman.2009.06.018
- Firoz S, 2012, INT J ENG, V1, P18
- FLAGER F., 2009, INFORM TECHNOLOGY CO, V14, P595
- Foraboschi P, 2014, ENERGBUILDINGS, V68, P254, DOI 10.1016/j.enbuild.2013.09.003
- Geyer P, 2012, ADV ENG INFORM, V26, P656, DOI 10.1016/j.aei.2012.04.005
- Gonzalez MJ, 2006, BUILD ENVIRON, V41, P902, DOI 10.1016/j.buildenv.2005.04.006
- Gustavsson L, 2006, BUILD ENVIRON, V41, P940, DOI 10.1016/j.buildenv.2005.04.008
- Hacker JN, 2008, ENERGBUILDINGS, V40, P375, DOI 10.1016/j.enbuild.2007.03.005
- Halog A, 2011, SUSTAINABILITY-BASEL, V3, P469, DOI 10.3390/su3020469
- Heinisuo M, 2010, P EUR C PROD PROC MO
- Hiyama K, 2014, ENERGBUILDINGS, V73, P83, DOI 10.1016/j.enbuild.2014.01.025
- Hossaini N., 2014, J ENVIRON PLANN MAN, P1
- Hsu SL, 2010, THESIS
- Hu ZZ, 2011, AUTOMAT CONSTR, V20, P167, DOI 10.1016/j.autcon.2010.09.014
- Huberman N, 2008, ENERGBUILDINGS, V40, P837, DOI 10.1016/j.enbuild.2007.06.002
- Huston DR, 2014, STRUCT C BOST MASS U
- Ibn-Mohammed T, 2013, ENERGBUILDINGS, V66, P232, DOI 10.1016/j.enbuild.2013.07.026
- Iddon CR, 2013, ENERGBUILDINGS, V67, P479, DOI 10.1016/j.enbuild.2013.08.041
- Inyim P, 2013, P ICCREM KARLSR GERM
- [Anonymous], 2006, 14040 ISO
- Jaehyun Park, 2012, Construction Innovation, V12, P335, DOI 10.1108/14714171211244587
- Jalaei F, 2014, CONSTR RES C ATL GEO
- John S, 2008, ENV IMPACTS MULTISTO
- Jrade A, 2013, BUILD SIMUL-CHINA, V6, P429, DOI 10.1007/s12273-013-0120-0
- Kahhat R, 2009, J INFRASTRUCT SYST, V15, P211, DOI 10.1061/(ASCE)1076-0342(2009)15:3(211)
- Kendrick C, 2012, ENERGBUILDINGS, V48, P40, DOI 10.1016/j.enbuild.2012.01.009
- Khasreen M., 2009, SUSTAINABILITY, P674
- Kohler K, 2003, UNEP IND ENV, P17
- Kovacic I., 2013, VISUALIZATION ENG, V1, P1, DOI DOI 10.1186/2213-7459-1-13
- Kulahcioglu T, 2012, HVAC&R RES, V18, P283, DOI 10.1080/10789669.2012.634264
- Kymmell W., 2008, BUILDING INFORM MODE
- Lee S, 2013, ENERGBUILDINGS, V58, P93, DOI 10.1016/j.enbuild.2012.11.034
- Lee SK, 2014, AUTOMAT CONSTR, V41, P96, DOI 10.1016/j.autcon.2013.10.020
- Lee SI, 2012, AUTOMAT CONSTR, V23, P20, DOI 10.1016/j.autcon.2011.12.008
- Lenzen M, 2009, ENVIRON SCI TECHNOL, V43, P8251, DOI 10.1021/es902090z
- Li B., 2012, Structural Survey, V30, P411, DOI 10.1108/02630801211288198
- Liu CH, 2012, NAT RESOUR FORUM, V36, P123, DOI 10.1111/j.1477-8947.2012.01439.x
- Liu W, 2014, INT J ADV ROBOT SYST, V11, P1
- Lu SR, 2009, GERONTECHNOLOGY, V11, P2
- Luo H, 2014, J INTELL ROBOT SYST
- Mao C, 2013, INT J DIGIT CONTENT, V7, P645
- McAuley B, 2012, P JOINT CIB W055 W06
- Memarzadeh M, 2012, P CONSTR RES C W LAF
- Miller D, 2013, P 22 AUSTR C MECH ST, P1009
- Miller D, 2015, SUSTAIN CITIES SOC, V16, P39, DOI 10.1016/j.scs.2015.02.003
- Miller D, 2015, CONSTR BUILD MATER, V80, P329, DOI 10.1016/j.conbuildmat.2015.01.071
- Miller D, 2015, STRUCT DES TALL SPEC, V24, P421, DOI 10.1002/tal.1172
- Miller SA, 2013, J IND ECOL, V17, P352, DOI 10.1111/j.1530-9290.2012.00531.x
- Moncaster A. M., 2012, INT J SUSTAIN BUILD, V3, P26, DOI DOI 10.1080/2093761X.2012.673915
- Monteiro A, 2013, AUTOMAT CONSTR, V35, P238, DOI 10.1016/j.autcon.2013.05.005
- Nawari N, 2011, INT WORKSH COMP CIV
- Nawari N, 2011, COMPUT CIVIL ENG, P569
- Ness D, 2014, J CLEAN PROD, P1
- Nour M., 2012, INT J ENG RES APPL, V2, P411
- Omar WMSW, 2014, SUSTAIN CITIES SOC, V10, P101, DOI 10.1016/j.scs.2013.06.002
- O'Reilly A, 2012, CONSTR RES INNOV, V3, P28

- Ortiz O, 2009, CONSTR BUILD MATER, V23, P28, DOI 10.1016/j.conbuildmat.2007.11.012
- Oti AH, 2014, COMPUT CIV BUILD ENG, P219
- Perez N, 2008, P WORLD C SUST BUILD, P244
- Porwal A, 2012, J CONSTR ENG M ASCE, V138, P943, DOI 10.1061/(ASCE)CO.1943-7862.0000508
- Puskas A, 2014, ADV ENV SCI DEV CHEM
- Rafiq MY, 2014, J COMPUT CIVIL ENG, V28, DOI 10.1061/(ASCE)CP.1943-5487.0000295
- Rajendran P, 2012, P 2 INT C MAN LANGK
- Ramesh T, 2010, ENERG BUILDINGS, V42, P1592, DOI 10.1016/j.enbuild.2010.05.007
- Reddy BVV, 2003, ENERG BUILDINGS, V35, P129
- Rekola M, 2012, ARCHIT ENG DES MANAG, V8, P78, DOI 10.1080/17452007.2012.659503
- Roh S, 2014, RENEW SUST ENERG REV, V35, P410, DOI 10.1016/j.rser.2014.04.034
- Russell-Smith SV, 2015, J CLEAN PROD, V88, P43, DOI 10.1016/j.jclepro.2014.03.025
- Russell-Smith S., 2011, COMPUT CIV ENG, P760
- Sanguinetti P, 2012, ADV ENG INFORM, V26, P317, DOI 10.1016/j.aei.2011.12.001
- Schlueter A, 2009, AUTOMAT CONSTR, V18, P153, DOI 10.1016/j.autcon.2008.07.003
- Schwartz Y, 2016, PCIBSE TECHN S ED UK
- Shi X, 2010, FRONTIERS ARCHITECTU, V4, P512
- Silva RD, 2013, 2 WORLD S COL SRI LA, P427
- Singh A, 2011, J ARCHIT ENG, V17, P15, DOI [10.1061/(ASCE)AE.1943-5568.0000026, 10.1016/j.jmoneco.2010.05.012]
- Solnosky R., 2014, STRUCT C BOST MASS U
- Solnosky R, 2013, CURRENT STATUS BIM B
- Song S, 2012, COMPUT IND, V63, P895, DOI 10.1016/j.compind.2012.08.013
- Stadel A, 2011, J PROF ISS ENG ED PR, V137, P51, DOI 10.1061/(ASCE)EI.1943-5541.0000053
- Succar B, 2009, AUTOMAT CONSTR, V18, P357, DOI 10.1016/j.autcon.2008.10.003
- Tae S, 2011, ENVIRON IMPACT ASSES, V31, P253, DOI 10.1016/j.eiar.2010.07.002
- Takano A, 2015, BUILD ENVIRON, V89, P192, DOI 10.1016/j.buildenv.2015.03.001
- Treloar G.J., 2000, CONSTRUCTION MANAGEM, V18, P5, DOI DOI 10.1080/014461900370898
- Treloar G. J., 1998, THESIS
- Tulke J., 2007, P CIB W78 24 INT C I, P79
- Tulke J, 2008, P 17 IABSE C CHIC US
- Venkatarama R., 2003, ENERGY BUILD, V35, P129
- Wang E, 2011, P 47 ASC ANN INT C U
- Wang ED, 2013, J CLEAN PROD, V43, P166, DOI 10.1016/j.jclepro.2012.12.010
- Wang HJ, 2013, ENERG BUILDINGS, V67, P267, DOI 10.1016/j.enbuild.2013.08.025
- Wang LS, 2014, ENERG BUILDINGS, V78, P79, DOI 10.1016/j.enbuild.2014.04.015
- Weisenberger G, 2011, PRACT PERIOD STRUCT, P146
- Welle B, 2011, BUILD SIMUL-CHINA, V4, P293, DOI 10.1007/s12273-011-0052-5
- Wong JKW, 2014, AUTOMAT CONSTR, V44, P163, DOI 10.1016/j.autcon.2014.04.003
- Wong K., 2013, FACILITIES, V31, P138, DOI [10.1108/02632771311299412, DOI 10.1108/02632771311299412]
- Xa S, 2013, P INT C COSNTR REAL, P555
- Xing S, 2008, ENERG BUILDINGS, V40, P1188, DOI 10.1016/j.enbuild.2007.10.016
- Yan W, 2013, P BS2013 CHAMB FRANC
- Yang J, 2005, SMART AND SUSTAINABLE BUILT ENVIRONMENTS, P1, DOI 10.1002/9780470759493
- Yuan Y, 2013, J CONVERG INF TECHNO, V8, P502
- Yuan Y, 2011, PROCEDIA ENGINEER, V15, DOI 10.1016/j.proeng.2011.08.987
- Zeng MN, 2012, ADV MATER RES-SWITZ, V374-377, P2557, DOI 10.4028/www.scientific.net/AMR.374-377.2557
- Zhiliang M., 2011, AUTOMAT CONSTR, V20, P196, DOI DOI 10.1016/J.AUTC0N.2010.09.017
- Zuo J, 2014, RENEW SUST ENERG REV, V30, P271, DOI 10.1016/j.rser.2013.10.021
- [Anonymous], 2005, WORLD SUST BUILD C T, P1356

NR 143

TC 7

Z9 7

U1 26

U2 99

PU PERGAMON-ELSEVIER SCIENCE LTD

PI OXFORD  
 PA THE BOULEVARD, LANGFORD LANE, KIDLINGTON, OXFORD OX5 1GB, ENGLAND  
 SN 1364-0321  
 J9 RENEW SUST ENERG REV  
 JI Renew. Sust. Energ. Rev.  
 PD JAN  
 PY 2017  
 VL 67  
 BP 811  
 EP 825  
 DI 10.1016/j.rser.2016.09.028  
 PG 15  
 WC GREEN & SUSTAINABLE SCIENCE & TECHNOLOGY; Energy & Fuels  
 SC Science & Technology - Other Topics; Energy & Fuels  
 GA ED7YP  
 UT WOS:000389088900059  
 DA 2018-05-03  
 ER

PT J  
 AU Strengers, Y  
 Nicholls, L  
 Maller, C  
 AF Strengers, Yolande  
 Nicholls, Larissa  
 Maller, Cecily  
 TI Curious energy consumers: Humans and nonhumans in assemblages of  
 household practice  
 SO JOURNAL OF CONSUMER CULTURE  
 LA English  
 DT Article  
 DE Consumers; energy consumption; distributed agency; social practices;  
 assemblages  
 ID AGENTIC CAPACITIES; AGENCY

AB In international energy policy, programmes and consumer research, a dominant ideal consumer is emerging. This consumer is typically a human adult who has the agency to make autonomous, functional and rational decisions about his or her household's energy consumption. This article seeks to disrupt this dominant anthropocentric conceptualisation of the consumer and provide new ways of knowing and potentially intervening in the lives of energy consumers. Drawing on qualitative research conducted with householders living in Sydney, Australia, and theories of practice, materiality and agency from sociology and science and technology studies, we seek to understand consumers as human and nonhuman actants operating in distributed assemblages of practice. We explore the implications of conceptualising non-traditional consumers of energy, such as babies, pets, pests and pool pumps, as performers of or materials in practices that consume energy. Our analysis provides new ways of potentially intervening in patterns of energy consumption. We argue that policy makers need to refocus their attention on finding routes into assemblages of practice to achieve change. We conclude by calling for further exploration and recognition of the myriad curious consumers found in households.

C1 [Strengers, Yolande; Nicholls, Larissa; Maller, Cecily] RMIT Univ, Ctr Urban Res, Melbourne, Vic, Australia.

RP Strengers, Y (reprint author), RMIT Univ, Ctr Urban Res, Melbourne, Vic, Australia.

EM yolande.strengers@rmit.edu.au

RI Nicholls, Larissa/P-5906-2015

OI Nicholls, Larissa/0000-0001-6841-0696; Strengers,

Yolande/0000-0002-5664-621X; Maller, Cecily/0000-0001-8322-2124

FU TransGrid; Ausgrid; Endeavour Energy

FX The research presented in this paper was conducted as part of the Co-managing Home Energy Demand project funded by TransGrid and supported by Ausgrid and Endeavour Energy. The authors are grateful for their

support and assistance with the research. The views expressed in this paper do not necessarily represent the views of TransGrid, Ausgrid or Endeavour Energy. The authors also thank the two anonymous reviewers for their insightful feedback, and the curious consumers who generously gave their time to assist with this research.

CR Accenture, 2012, NEW EN CONS BAL STRA  
 Accenture, 2011, REV VAL NEW EN CONS  
 AEMC, 2011, ISS PAP POW CHOIC GI  
 Attfield J., 2000, WILD THINGS MAT CULT  
 Bennett J., 2005, PUBLIC CULTURE, V17, P445, DOI 10.1215/08992363-17-3-445  
 Bennett Jane, 2010, VIBRANT MATTER POLIT  
 Bennett J., 2007, NEW LEFT REV, P133  
 Coole D., 2005, POLIT STUD-LONDON, V53, P124, DOI 10.1111/j.1467-9248.2005.00520.x  
 Coole D., 2013, MILLENNIUM-J INT ST, V41, P451, DOI 10.1177/0305829813481006  
 Gram-Hanssen K., 2011, J CONSUM CULT, V11, P61, DOI 10.1177/1469540510391725  
 Gram-Hanssen K., 2007, SUSTAINABILITY SCI P, V3, P1  
 Hargreaves T., 2011, J CONSUM CULT, V11, P79, DOI 10.1177/1469540510390500  
 Latour B., 2005, REASSEMBLING SOCIAL  
 Law J., 1993, MODERNITY MYTH MAT  
 Law J., 2013, SOC STUD SCI, V43, P363, DOI 10.1177/0306312712456947  
 Law J., 2009, CULT SOCIOL, V3, P239, DOI 10.1177/1749975509105533  
 Reckwitz A., 2002, J THEOR SOC BEHAV, V32, P195, DOI 10.1111/1468-5914.00183  
 Schatzki T., 2010, NAT CULT, V5, P123, DOI 10.3167/nc.2010.050202  
 SGA, 2011, MAX CONS BEN  
 SGCC, 2012, 2012 STAT CONS REP  
 Shove E., 2005, Journal of Consumer Culture, V5, P43, DOI 10.1177/1469540505049846  
 Shove E., 1997, INT HDB ENV SOCIOLOG, P271  
 Shove E., 2003, COMFORT CLEANLINESS  
 Shove E., 2012, DYNAMICS SOCIAL PRAC  
 Strengers Y., 2013, CONSUM PUBLIC LIFE, P1, DOI 10.1057/9781137267054  
 Strengers Y., 2012, ENERG POLICY, V44, P226, DOI 10.1016/j.enpol.2012.01.046  
 Trentmann F., 2006, MAKING CONSUMER KNOW, P1  
 Schurr A., 2009, LIGHTING WAY UNDERST  
 van Vliet B., 2005, INFRASTRUCTURES CONS  
 Verbeek P.-P., 2006, USER BEHAV TECHNOLOG, P309  
 Warde A., 2005, J CONSUM CULT, V5, P131, DOI DOI 10.1177/1469540505053090  
 Wheeler W., 2012, NEW FORMATIONS, P5  
 Zpryme, 2011, NEW EN CONS

NR 33  
 TC 7  
 Z9 7  
 U1 0  
 U2 7

PU SAGE PUBLICATIONS LTD  
 PI LONDON  
 PA 1 OLIVERS YARD, 55 CITY ROAD, LONDON EC1Y 1SP, ENGLAND  
 SN 1469-5405  
 EI 1741-2900  
 J9 J CONSUM CULT  
 JIJ. Consum. Cult.  
 PD NOV  
 PY 2016  
 VL 16  
 IS 3  
 BP 761  
 EP 780  
 DI 10.1177/1469540514536194  
 PG 20

WC Cultural Studies; Sociology

SC Cultural Studies; Sociology

GA EA8ZF

UT WOS:000386928300006

DA 2018-05-03

ER

PT J

AU Atalla, TN

Hunt, LC

AF Atalla, Tarek N.

Hunt, Lester C.

TI Modelling residential electricity demand in the GCC countries

SO ENERGY ECONOMICS

LA English

DT Article

DE GCC residential electricity demand; Structural time series model; Impact of weather and exogenous underlying energy demand trend (UEDT)

ID UNDERLYING ENERGY DEMAND; PANEL COINTEGRATION ANALYSIS; ASYMMETRIC PRICE RESPONSES; DYNAMIC REGRESSION-MODELS; TRANSPORT OIL DEMAND; CLIMATE-CHANGE; CONSUMPTION; TRENDS; UK; SEASONALITY

AB This paper aims at understanding the drivers of residential electricity demand in the Gulf Cooperation Council countries by applying the structural time series model. In addition to the economic variables of GDP and real electricity prices, the model accounts for population, weather, and a stochastic underlying energy demand trend as a proxy for efficiency and human behaviour. The resulting income and price elasticities are informative for policy makers given the paucity of previous estimates for a region with particular political structures and economies subject to large shocks. In particular, the estimates allow for a sound assessment of the impact of energy related policies suggesting that if policy makers in the region wish to curtail future residential electricity consumption they would need to improve the efficiency of appliances and increase energy using awareness of consumers, possibly by education and marketing campaigns. Moreover, even if prices were raised the impact on curbing residential electricity growth in the region is likely to be very small given the low estimated price elasticities-unless, that is, prices were raised so high that expenditure on electricity becomes such a large proportion of income that the price elasticities increase (in absolute terms). (C) 2016 King Abdullah Petroleum Studies and Research Center (KAPSARC). Published by Elsevier B.V.

C1 [Atalla, Tarek N.; Hunt, Lester C.] KAPSARC, Riyadh, Saudi Arabia.

[Hunt, Lester C.] Univ Surrey, SEEC, Guildford GU2 5XH, Surrey, England.

RP Atalla, TN (reprint author), KAPSARC, Riyadh, Saudi Arabia.

EM Tarek.Atallah@outlook.com; L.Hunt@surrey.ac.uk

CR AbdelAal RE, 1997, ENERGY, V22, P911, DOI 10.1016/S0360-5442(97)00019-4

Ackah I, 2014, OPEC ENERGY REV, V38, P272, DOI 10.1111/opec.12026

Adeyemi OI, 2014, ENER E CON, V45, P435, DOI 10.1016/j.eneco.2014.07.012

Adeyemi OI, 2010, ENER E CON, V32, P1157, DOI 10.1016/j.eneco.2010.04.003

Akbari H., 1996, P 1996 ACEEE SUMM ST, P11

Al-Faris ARF, 2002, ENER POLICY, V30, P117, DOI 10.1016/S0301-4215(01)00064-7

Amato AD, 2005, CLIMATIC CHANGE, V71, P175, DOI 10.1007/s10584-005-5931-2

Arab Union of Electricity (n.d.), STAT B

Arab Union of Electricity, 2012, EL TAR AR COUNTR 201

Atallah T N, 2015, GLOBAL DEGREE DAYS D

Bigano A, 2006, 11206 FEEM

Broadstock DC, 2015, INT J SUSTAIN TRANSP, V9, P310, DOI 10.1080/15568318.2013.769653

Broadstock DC, 2010, ENER POLICY, V38, P1559, DOI 10.1016/j.enpol.2009.11.039

Christenson M, 2006, ENER CONVERS MANAGE, V47, P671, DOI 10.1016/j.enconman.2005.06.009

Davis WB, 2003, ENER E CON, V25, P375, DOI 10.1016/S0140-9883(02)00094-4

De Cian E, 2013, CLIMATIC CHANGE, V116, P805, DOI 10.1007/s10584-012-0514-5

Diabi A., 1998, OPEC REV, V22, P13

Dilaver O, 2014, J NAT GAS SCI ENG, V19, P125, DOI 10.1016/j.jngse.2014.04.002

Dilaver Z, 2011, ENERGY, V36, P6686, DOI 10.1016/j.energy.2011.07.043

Dilaver Z, 2011, ENER POLICY, V39, P3117, DOI 10.1016/j.enpol.2011.02.059  
 Dilaver Z, 2011, ENER ECON, V33, P426, DOI 10.1016/j.eneco.2010.10.001  
 Dimitropoulos J, 2005, APPL ECON LETT, V12, P239, DOI 10.1080/1350485052000337789  
 ECRA, SAUD AR TAR GEN  
 El-Katiri L., 2011, EL8 OIES  
 Elkhafif MAT, 1996, ENER ECON, V18, P221, DOI 10.1016/0140-9883(96)00010-2  
 Eltony MN, 2007, OPEC ENERGY REV, V31, P159, DOI 10.1111/j.1468-0076.2007.00181.x  
 Eltony M.N., 1996, J ENERGY DEV, V21, P293  
 Eltony M. N., 1995, OPEC REV, VXIX, P37  
 Eltony M. N. M., 1993, J ENERGY DEV, V18, P213  
 Enerdata, 2015, EN GLOB EN CO2 DAT  
 Eskeland G.S., 2009, 2000901 CICERO  
 Fattouh B., 2014, MEP8 OIES  
 Harvey A, 1997, ECON J, V107, P192, DOI 10.1111/1468-0297.00152  
 HARVEY A, 1994, ECON J, V104, P1324, DOI 10.2307/2235451  
 Harvey A, 1989, FORECASTING STRUCTUR  
 HARVEY AC, 1992, J BUS ECON STAT, V10, P377, DOI 10.2307/1391813  
 HARVEY AC, 1986, ECON J, V96, P975, DOI 10.2307/2233168  
 Harvey AC, 1993, HDB STAT, V11, P261, DOI DOI 10.1016/50169-7161(05)80045-8  
 Hunt LC, 2003, ENERGY J, V24, P63  
 Hunt LC, 2003, ENER ECON, V25, P93, DOI 10.1016/S0140-9883(02)00072-5  
 Hunt L. C., 2003, ENERGY COMPETITIVE M, P140  
 Hunt LC, 2015, ENER ECON, V50, P273, DOI 10.1016/j.eneco.2015.05.006  
 IEA, 2014, WORLD EN BAL IEA WOR  
 IRENA, 2014, SULT OM REN READ ASS  
 Javid M, 2014, ENERGY, V64, P811, DOI 10.1016/j.energy.2013.10.051  
 Kingdom of Bahraini Energy and Water Authority, 2015, TAR SERV RAT  
 Koopman S. J., 2007, STRUCTURAL TIME SERI  
 Narayan PK, 2007, ENER POLICY, V35, P4485, DOI 10.1016/j.enpol.2007.03.018  
 Narayan PK, 2009, ENER POLICY, V37, P229, DOI 10.1016/j.enpol.2008.08.020  
 Olonscheck M, 2011, ENER POLICY, V39, P4795, DOI 10.1016/j.enpol.2011.06.041  
 Perez-Lombard L, 2008, ENER BUILDINGS, V40, P394, DOI 10.1016/j.enbuild.2007.03.007  
 Reiche D, 2010, ENER POLICY, V38, P2395, DOI 10.1016/j.enpol.2009.12.031  
 ROSENTHAL DH, 1995, ENERGY J, V16, P77  
 Sa'ad S, 2009, OPEC ENERGY REV, V33, P140, DOI 10.1111/j.1753-0237.2009.00165.x  
 Sa'ad S, 2011, ENER POLICY, V39, P40, DOI 10.1016/j.enpol.2010.09.001  
 Squalli J, 2007, ENER ECON, V29, P1192, DOI 10.1016/j.eneco.2006.10.001  
 World Bank, 2014, WORLD DEV IND 2014

NR 57

TC 7

Z9 7

U1 1

U2 11

PU ELSEVIER SCIENCE BV

PI AMSTERDAM

PA PO BOX 211, 1000 AE AMSTERDAM, NETHERLANDS

SN 0140-9883

EI 1873-6181

J9 ENER ECON

JI Energy Econ.

PD SEP

PY 2016

VL 59

BP 149

EP 158

DI 10.1016/j.eneco.2016.07.027

PG 10

WC Economics

SC Business & Economics  
 GA EA2DK  
 UT WOS:000386402800014  
 OA gold  
 DA 2018-05-03  
 ER

PT J

AU Moran, AJ  
 Profaizer, P  
 Zapater, MH  
 Valdavida, MA  
 Bribian, IZ

AF Janez Moran, Alberto  
 Profaizer, Paolo  
 Herrando Zapater, Maria  
 Anderez Valdavida, Maria  
 Zabalza Bribian, Ignacio

TI Information and Communications Technologies (ICTs) for energy efficiency  
 in buildings: Review and analysis of results from EU pilot projects

SO ENERGY AND BUILDINGS

LA English

DT Review

DE Information and Communication; Technology; European Union; Energy  
 efficiency; Energy savings; Energy management system; Public building

ID OPTIMIZATION; CONSUMPTION; PREDICTION; MANAGEMENT; ALGORITHM; SYSTEM

AB Information and Communications Technologies (ICTs) can play a potential role in improving the energy performance of buildings by the implementation of effective solutions that take advantage of the energy interactions between all the elements included in a building.

A revision of the 105 pilots implemented or under implementation in 18 projects in the area of ICTs for energy efficiency in buildings located in 23 European countries, through 88 cities with different types of climates, buildings and technologies have been carried out through documentary and field analysis of the energy, economic and social project results. These results have been extrapolated to assess the potential energy savings which could be expected at the EU level by implementing the solutions proposed by the projects.

By the implementation of the different ICT solutions, buildings have achieved more than 20% energy savings. Pilots have demonstrated that the effectiveness of the ICT solution does not depend directly on the different climates where the solutions are implemented, but on several factors, such as the level of motivation, perceived thermal comfort, quality of social interaction and communication and ICT support. (C) 2016 Elsevier B.V. All rights reserved.

C1 [Janez Moran, Alberto; Profaizer, Paolo; Herrando Zapater, Maria; Anderez Valdavida, Maria; Zabalza Bribian, Ignacio] CIRCE Res Ctr Energy Resources & Consumpt CIRCE, CIRCE Bldg Campus Rio Ebro, Mariano Esquillor 15, Zaragoza 50018, Spain.

RP Bribian, IZ (reprint author), CIRCE Res Ctr Energy Resources & Consumpt CIRCE, CIRCE Bldg Campus Rio Ebro, Mariano Esquillor 15, Zaragoza 50018, Spain.

EM albjm@fcirce.es; pprofaizer@gmail.com; mherrando@fcirce.es;  
 marianderez@gmail.com; izabal@unizar.es

OI Zabalza Bribian, Ignacio/0000-0001-6183-0831

FU European Commission - DG Communications Networks, Content Technology  
 [SMART 2013/0073]

FX This paper was developed from the results obtained in the framework of the study "SMART 2013/0073 - reducing energy consumption in buildings with ICT - analysis of data from EU pilot projects" financed by the European Commission - DG Communications Networks, Content & Technology and executed by CIRCE.

CR Bloom Eric, 2013, BUILDING ENERGY MANA

Egan J., 2010, MULTIPLE INPUT MULTI

European Commission, 2014, OFF J EUR UNION, V57

Gravogl K., 2011, CHOOSING BEST WIRELE  
Hajdukiewicz M., 2015, BUILD ENVIRON, V86, P1, DOI 10.1016/j.buildenv.2014.12.012  
Hannus M., 2010, ICT SUPPORTED ENERGY  
Hardy A., 2011, INT J ADV ENG SCI TE, V3, P61  
High-Level Advisory Group and REEB Consortium, 2009, SMART BUILD  
Ishida H., 2015, TELEMAT INFORM, V32, P79, DOI 10.1016/j.tele.2014.04.003  
Kailas A., 2012, J COMPUTER NETWORKS, V2012, P1  
Keng EG, 2010, P ASIA PACIFIC ADV N, V30, P71  
Kramers A., 2011, ICT APPL ENERGY EFFI  
Kramers A., 2014, ENVIRON MODELL SOFTW, V56, P52, DOI 10.1016/j.envsoft.2013.12.019  
Kyselytsya Y., 2006, IMPLEMENTATION KNX S  
Lazos D., 2015, BUILD ENVIRON, V90, P82, DOI 10.1016/j.buildenv.2015.03.025  
Marsic V., 2011, 19 TEL FOR TELEFOR  
Nyvlt O., 2011, BUSES PROTOCOLS SYST  
Pang XF, 2012, BUILD ENVIRON, V54, P100, DOI 10.1016/j.buildenv.2012.02.003  
Petri I., 2014, HPC BASED CLOUD MODE  
Srisikanthan N., 2002, MICROPROCESS MICROSY, V26, P281, DOI 10.1016/S0141-9331(02)00039-X  
Tang F., 2014, ENERGBUILDINGS, V82, P310, DOI 10.1016/j.enbuild.2014.07.037  
Webb M., 2008, SMART 2020 EN LOW CA  
Wei XP, 2014, ENERGY, V73, P898, DOI 10.1016/j.energy.2014.06.102  
Woodall G., 2011, D1 2 NONRESIDENTIAL  
Yang CF, 2014, ENERGBUILDINGS, V76, P92, DOI 10.1016/j.enbuild.2014.02.053  
Ye J., 2016, ICT ENERGY EFFICIENC  
Yuce B., 2016, IEEE T AUTOM SCI ENG, V2015, P1  
Yuce B., 2014, ENERGBUILDINGS, V80, P45, DOI 10.1016/j.enbuild.2014.04.052  
Yuce B., 2016, ENERGBUILDINGS, V111, P311, DOI 10.1016/j.enbuild.2015.11.017

NR 29

TC 7

Z9 7

U1 1

U2 12

PU ELSEVIER SCIENCE SA

PI LAUSANNE

PA PO BOX 564, 1001 LAUSANNE, SWITZERLAND

SN 0378-7788

EI 1872-6178

J9 ENERGBUILDINGS

J1 Energy Build.

PD SEP 1

PY 2016

VL 127

BP 128

EP 137

DI 10.1016/j.enbuild.2016.05.064

PG 10

WC Construction & Building Technology; Energy & Fuels; Engineering, Civil

SC Construction & Building Technology; Energy & Fuels; Engineering

GA DT5NH

UT WOS:000381529400012

DA 2018-05-03

ER

PT J

AU Patti, E

Acquaviva, A

Jahn, M

Pramudianto, F

Tomasi, R



- Rabourdin, D  
 Virgone, J  
 Macii, E  
 AF Patti, Edoardo  
 Acquaviva, Andrea  
 Jahn, Marco  
 Pramudianto, Ferry  
 Tomasi, Riccardo  
 Rabourdin, Damien  
 Virgone, Joseph  
 Macii, Enrico
- TI Event-Driven User-Centric Middleware for Energy-Efficient Buildings and Public Spaces  
 SO IEEE SYSTEMS JOURNAL  
 LA English  
 DT Article  
 DE Ambient intelligent; energy efficiency; event-driven middleware; Internet of things; pervasive computing; smart buildings; ubiquitous computing; user-centered development; web services  
 ID AMBIENT INTELLIGENCE
- AB In this paper, the design of an event-driven usercentric middleware for monitoring and managing energy consumption in public buildings and spaces is presented. The main purpose is to increase energy efficiency in buildings and public spaces, thus reducing consumption. To achieve this, the proposed service-oriented middleware has been designed to be event based, also exploiting the user behavior patterns of people who live and work in buildings. Furthermore, it allows an easy integration of heterogeneous technologies in order to enable a hardwareindependent interoperability between them. Moreover, a heating ventilation and air conditioning (HVAC) control strategy has been developed, and the whole infrastructure has been deployed in a real-world case study consisting of a historical building. Finally, the results will be presented and discussed.
- C1 [Patti, Edoardo; Acquaviva, Andrea; Macii, Enrico] Politecn Torino, Dept Control & Comp Engn, I-10129 Turin, Italy.  
 [Jahn, Marco; Pramudianto, Ferry] Fraunhofer Inst Appl Informat Technol FIT, Dept User Ctr Comp, D-53754 St Augustin, Germany.  
 [Tomasi, Riccardo] Ist Super Mario Boella, I-10138 Turin, Italy.  
 [Rabourdin, Damien; Virgone, Joseph] Univ Lyon 1, Ctr Therm Lyon, F-69621 Villeurbanne, France.
- RP Patti, E (reprint author), Politecn Torino, Dept Control & Comp Engn, I-10129 Turin, Italy.  
 EM edoardo.patti@polito.it; andrea.acquaviva@polito.it;  
 marco.jahn@fit.fraunhofer.de; ferry.pramudianto@fit.fraunhofer.de;  
 tomasi@ismb.it; damien.rabourdin@insa-lyon.fr;  
 joseph.virgone@insa-lyon.fr; enrico.macii@polito.it
- OI Patti, Edoardo/0000-0002-6043-6477; Tomasi, Riccardo/0000-0001-9594-3834  
 FU SEEMPubS; DIMMER; Tribute
- FX This work was supported by SEEMPubS, DIMMER, and Tribute, which are European Seventh Framework Programme research projects.
- CR Bonino D., 2008, P IEEE T CONS EL, P1656  
 Brizzi P., 2013, P 2013 IEEE 18 C EM, P1  
 Candido G., 2009, P 35 ANN IEEE IECON, P3931  
 Candido G., 2011, IEEE T IND INFORM, V7, P759, DOI 10.1109/TII.2011.2166779  
 Caragliu A., 2009, SMART CITIES EUROPE, V0048  
 Corno F., 2009, LECT NOTES COMPUTER  
 DESRUISSEAU B, 2009, 5545 RFC INT ENG TAS  
 Eisenhauer M., 2009, P 6 ANN IEEE COMM SO, P1, DOI DOI 10.1109/SAHCNW.2009.5172913  
 Erickson V L, 2011, Proceedings 2011 10th International Conference on Information Processing in Sensor Networks (IPSN 2010), P258  
 Fraisse G, 1997, HEAT VENT AIR COND R, V4, P369  
 Guinard D, 2010, IEEE T SERV COMPUT, V3, P223, DOI 10.1109/TSC.2010.3

Hoffmann M, 2008, DEVELOPING AMBIENT INTELLIGENCE, PROCEEDINGS OF THE INTERNATIONAL CONFERENCE ON AMBIENT INTELLIGENCE DEVELOPMENTS (AMI.D'07), P13, DOI 10.1007/978-2-287-78544-3\_2

Jahn M., 2011, 2 INT C ENERGYEFFICI, V2011, P87

Jahn M., 2013, P INT C SMART GRIDS, P171

Jahn M., 2010, P 5 INT C FUT INF TE, P1, DOI DOI 10.1109/FUTURETECH.2010.5482712

Hofmann M., 2011, 12 INT WORKSH IM AN

Karnouskos S., 2010, P 14 IEEE ISCE BRAUN, P1

Llinas J., 2004, P 7 INT C INF FUS ST, P1218

Milagro F., 2008, P INT THINGS WORKSH, P1

Priyantha NB, 2008, SENSYS'08: PROCEEDINGS OF THE 6TH ACM CONFERENCE ON EMBEDDED NETWORKED SENSOR SYSTEMS, P253

Simon J., 2012, P 11 INT C MOB UB MU

Sleman A, 2010, 2010 SECOND INTERNATIONAL CONFERENCE ON COMPUTATIONAL INTELLIGENCE, COMMUNICATION SYSTEMS AND NETWORKS (CICSYN), P137, DOI 10.1109/CICSyN.2010.22

Stavropoulos TG, 2013, EXPERT SYST APPL, V40, P4380, DOI 10.1016/j.eswa.2013.01.061

Teixeira T., 2010, ACM COMPUT SURV, V5, P1

Warmer C., 2009, P GRID INT ROAD INT, P1

Zamora-Izquierdo MA, 2010, IEEE PERVAS COMPUT, V9, P66, DOI 10.1109/MPRV.2010.20

NR 26

TC 7

Z9 7

U1 1

U2 5

PU IEEE-INST ELECTRICAL ELECTRONICS ENGINEERS INC

PI PISCATAWAY

PA 445 HOES LANE, PISCATAWAY, NJ 08855-4141 USA

SN 1932-8184

EI 1937-9234

J9 IEEE SYST J

JI IEEE Syst. J.

PD SEP

PY 2016

VL 10

IS 3

BP 1137

EP 1146

DI 10.1109/JSYST.2014.2302750

PG 10

WC Computer Science, Information Systems; Engineering, Electrical & Electronic; Operations Research & Management Science; Telecommunications

SC Computer Science; Engineering; Operations Research & Management Science; Telecommunications

GA DV9KV

UT WOS:000383260300028

OA green\_published

DA 2018-05-03

ER

PT J

AU Zhou, X

    Yan, D

    Feng, XH

    Deng, GW

    Jian, YW

    Jiang, Y

AF Zhou, Xin

Yan, Da  
 Feng, Xiaohang  
 Deng, Guangwei  
 Jian, Yiwen  
 Jiang, Yi

TI Influence of household air-conditioning use modes on the energy performance of residential district cooling systems

SO BUILDING SIMULATION

LA English

DT Article

DE AC usage model; load distribution; residential district cooling system; uncertainty analysis; energy performance

ID BUILDING SIMULATION; THERMAL COMFORT; CONSUMPTION INFORMATION; OCCUPANT BEHAVIOR; EFFICIENCY; DEST; OPTIMIZATION; VERIFICATION; METHODOLOGY; TECHNOLOGY

AB During technical evaluations of cooling systems in residential buildings, it is necessary to consider the influence of the household air-conditioning (AC) use modes. In other words, how the occupants control the AC, for instance, when it is turned on, what the temperature setting is, and how long it is used. Field measurements and spot interviews indicate that AC usage by residents should be environmental, event and random related. A reduced-order AC conditional probability (CP) model was developed in this study to describe AC usage. The AC CP model was integrated with a building energy modeling program (BEMP) to reflect the interaction of the AC operation and the indoor environment. With consideration of stochastic AC use modes, the uncertainty of user compositions was studied. Additionally, simulation results revealed that AC use modes and user compositions can cause up to a 4.5-fold difference in the system efficiency of district cooling systems. The Lorenz curve and Gini coefficient were applied in this study to describe the load distribution in a quantitative manner. Through a comparison with the constant schedule definition model, the study also identified inclusion of the stochastic feature of AC use modes and their compositions in simulations as being important to the technical evaluation of district cooling systems.

C1 [Zhou, Xin] Southeast Univ, Sch Architecture, Nanjing 210096, Jiangsu, Peoples R China.

[Yan, Da; Feng, Xiaohang; Jiang, Yi] Tsinghua Univ, Sch Architecture, Beijing 100084, Peoples R China.

[Deng, Guangwei] Shanghai Res Inst, Bldg Sci Grp, Shanghai 610041, Peoples R China.

[Jian, Yiwen] Beijing Univ Technol, Beijing 100084, Peoples R China.

RP Zhou, X (reprint author), Southeast Univ, Sch Architecture, Nanjing 210096, Jiangsu, Peoples R China.

EM zhou-x06@seu.edu.cn

RI Yan, Da/M-8147-2017

FU Natural Science Foundation of Beijing, China [8142022]

FX This research is supported by the Natural Science Foundation of Beijing, China (No. 8142022).

CR Al-Qattan A, 2014, J POWER SOURCES, V257, P21, DOI 10.1016/j.jpowsour.2014.01.099

Araujo A.M., 2001, ENERGY, V26, P413

[Anonymous], 2010, 552010 ASHRAE

Boardman B, 2004, ENVIRON SCI POLICY, V7, P165, DOI 10.1016/j.envsci.2004.03.002

Building Energy Research Center of Tsinghua University, 2013, 2013 ANN REP CHIN BU

Chen SQ, 2008, ENERG BUILDINGS, V40, P654, DOI 10.1016/j.enbuild.2007.04.022

Chen X, 2001, PROCEEDINGS OF THE 4TH INTERNATIONAL CONFERENCE ON INDOOR AIR QUALITY, VENTILATION AND ENERGY CONSERVATION IN BUILDINGS, VOLS I-III, P1863

Chow TT, 2004, APPL ENERG, V79, P275, DOI 10.1016/j.apenergy.2004.01.002

Chow TT, 2004, ENERG BUILDINGS, V36, P1153, DOI 10.1016/j.enbuild.2004.04.002

Chow TT, 2004, APPL ENERG, V77, P1, DOI 10.1016/S0306-2619(03)00102-8

CORRODO G, 1921, ECON J, V31, P124

D'Oca S, 2015, ENERG BUILDINGS, V88, P395, DOI 10.1016/j.enbuild.2014.11.065

de Dear RJ, 2002, ENERG BUILDINGS, V34, P549, DOI 10.1016/S0378-7788(02)00005-1

Devotta S, 2005, INT J REFRIG, V28, P594, DOI 10.1016/j.ijrefrig.2004.09.013

Fanger P. O., 1970, THERMAL COMFORT ANAL

Feng XH, 2015, ENERG BUILDINGS, V87, P348, DOI 10.1016/j.enbuild.2014.11.067

Frontczak M, 2011, BUILD ENVIRON, V46, P922, DOI 10.1016/j.buildenv.2010.10.021

Hoes P, 2009, ENERG BUILDINGS, V41, P295, DOI 10.1016/j.enbuild.2008.09.008

ISO, 2005, 7730 ISO

- Jing ZX, 2014, ENERGY, V73, P399, DOI 10.1016/j.energy.2014.06.030
- Jones B, 2000, CAPABILITIES LIMITAT, P112
- Kamal WA, 1997, ENER G CONVERS MANAGE, V38, P39, DOI 10.1016/0196-8904(96)00012-X
- Korolija I, 2011, ENER G BUILDINGS, V43, P1247, DOI 10.1016/j.enbuild.2011.01.003
- Lam JC, 2008, ENER G CONVERS MANAGE, V49, P2354, DOI 10.1016/j.enconman.2008.01.013
- Lenzen M, 2006, ENERGY, V31, P181, DOI 10.1016/j.energy.2005.01.009
- Long WD, 2003, PROCEEDINGS OF THE 4TH INTERNATIONAL SYMPOSIUM ON HEATING, VENTILATING AND AIR CONDITIONING, VOLS 1 AND 2, P493
- Meyers S, 2003, ENERGY, V28, P755, DOI 10.1016/S0360-5442(02)00188-3
- MORELLI N., 2001, J SUSTAINABLE PRODUC, V1, P3
- Nagota T, 2008, ENER G BUILDINGS, V40, P732, DOI 10.1016/j.enbuild.2007.05.007
- Nicol JF, 2001, P INT IBPSA BUILD SI, P493
- O'Doherty J, 2008, APPL ENER G, V85, P650, DOI 10.1016/j.apenergy.2008.01.001
- Ortiga J, 2013, APPL THERM ENG, V50, P1536, DOI 10.1016/j.applthermaleng.2011.10.041
- Page J, 2008, ENER G BUILDINGS, V40, P83, DOI 10.1016/j.enbuild.2007.01.018
- Pardo N, 2013, ENERGY, V52, P339, DOI 10.1016/j.energy.2013.01.062
- Peeters L, 2009, APPL ENER G, V86, P772, DOI 10.1016/j.apenergy.2008.07.011
- Peng C, 2012, BUILD SIMUL-CHINA, V5, P85, DOI 10.1007/s12273-011-0049-0
- Perez-Lombard L, 2008, ENER G BUILDINGS, V40, P394, DOI 10.1016/j.enbuild.2007.03.007
- Reinhart CF, 2004, SOL ENERGY, V77, P15, DOI 10.1016/j.solener.2004.04.003
- Ren XX, 2014, BUILD ENVIRON, V81, P172, DOI 10.1016/j.buildenv.2014.06.022
- Rezaie B, 2012, APPL ENER G, V93, P2, DOI 10.1016/j.apenergy.2011.04.020
- Richardson I, 2008, ENER G BUILDINGS, V40, P1560, DOI 10.1016/j.enbuild.2008.02.006
- Rijal HB, 2007, ENER G BUILDINGS, V39, P823, DOI 10.1016/j.enbuild.2007.02.003
- Shimoda Y, 2008, BUILD ENVIRON, V43, P569, DOI 10.1016/j.buildenv.2006.03.017
- Soderman J, 2007, APPL THERM ENG, V27, P2665, DOI 10.1016/j.applthermaleng.2007.05.004
- Tanimoto J, 2008, BUILD ENVIRON, V43, P610, DOI 10.1016/j.buildenv.2006.06.034
- Ueno T, 2006, APPL ENER G, V83, P166, DOI 10.1016/j.apenergy.2005.02.002
- Wang C, 2011, BUILD SIMUL-CHINA, V4, P149, DOI 10.1007/s12273-011-0044-5
- Wei S, 2014, ENER G BUILDINGS, V70, P36, DOI 10.1016/j.enbuild.2013.11.001
- Weibull W, 1951, ASME J APPL MECH, V18, P293
- Yan D, 2015, ENER G BUILDINGS, V107, P264, DOI 10.1016/j.enbuild.2015.08.032
- Yan D, 2008, BUILD SIMUL-CHINA, V1, P95, DOI 10.1007/s12273-008-8118-8
- Yoshino H, 2006, ENER G BUILDINGS, V38, P1308, DOI 10.1016/j.enbuild.2006.04.006
- Zhang WJ, 2009, FIFTH INTERNATIONAL WORKSHOP ON ENERGY AND ENVIRONMENT OF RESIDENTIAL BUILDINGS AND THIRD INTERNATIONAL CONFERENCE ON BUILT ENVIRONMENT AND PUBLIC HEALTH, VOL I AND II, PROCEEDINGS, P1768
- Zhang XL, 2008, BUILD SIMUL-CHINA, V1, P193, DOI 10.1007/s12273-008-8124-x
- Zhao J, 2014, ENER G BUILDINGS, V82, P341, DOI 10.1016/j.enbuild.2014.07.033
- Zhou X, 2013, COMP BUILDING ENERGY
- Zhou X, 2014, BUILD SIMUL-CHINA, V7, P21, DOI 10.1007/s12273-013-0150-7
- Zhu DD, 2013, BUILD SIMUL-CHINA, V6, P323, DOI 10.1007/s12273-013-0126-7
- NR 58
- TC 7
- Z9 7
- U1 6
- U2 17
- PU TSINGHUA UNIV PRESS
- PI BEIJING
- PA TSINGHUA UNIV, RM A703, XUEYAN BLDG, BEIJING, 100084, PEOPLES R CHINA
- SN 1996-3599
- EI 1996-8744
- J9 BUILD SIMUL-CHINA
- J1 Build. Simul.
- PD AUG
- PY 2016
- VL 9
- IS 4

BP 429  
 EP 441  
 DI 10.1007/s12273-016-0280-9  
 PG 13  
 WC Thermodynamics; Construction & Building Technology  
 SC Thermodynamics; Construction & Building Technology  
 GA DW7QJ  
 UT WOS:000383845800004  
 DA 2018-05-03  
 ER

PT J  
 AU Torriti, J  
     Hanna, R  
     Anderson, B  
     Yeboah, G  
     Druckman, A  
 AF Torriti, Jacopo  
     Hanna, Richard  
     Anderson, Ben  
     Yeboah, Godwin  
     Druckman, Angela

TI Peak residential electricity demand and social practices: Deriving flexibility and greenhouse gas intensities from time use and locational data

SO INDOOR AND BUILT ENVIRONMENT

LA English

DT Article

DE Demand side response; Load shifting; Peak demand; Residential electricity demand; Time-use

ID ENERGY-CONSUMPTION; GENDER; POLICY; WORK; OCCUPANCY; COUNTRIES; IMPACTS; SQUEEZE; MODELS; SECTOR

AB Peak residential electricity demand takes place when people conduct simultaneous activities at specific times of the day. Social practices generate patterns of demand and can help understand why, where, with whom and when energy services are used at peak time. The aim of this work is to make use of recent UK time use and locational data to better understand: (i) how a set of component indices on synchronisation, variation, sharing and mobility indicate flexibility to shift demand; and (ii) the links between people's activities and peaks in greenhouse gases' intensities. The analysis is based on a recent UK time use dataset, providing 1-min interval data from GPS devices and 10-min data from diaries and questionnaires for 175 data days comprising 153 respondents. Findings show how greenhouse gases' intensities and flexibility to shift activities vary throughout the day. Morning peaks are characterised by high levels of synchronisation, shared activities and occupancy, with low variation of activities. Evening peaks feature low synchronisation, and high spatial mobility variation of activities. From a network operator perspective, the results indicate that periods with lower flexibility may be prone to more significant local network loads due to the synchronisation of electricity-demanding activities.

C1 [Torriti, Jacopo; Hanna, Richard] Univ Reading, Sch Construct Management & Engr, Reading RG6 6AW, Berks, England.

[Anderson, Ben] Univ Southampton, Energy & Climate Change Div, Sustainable Energy Res Grp, Southampton, Hants, England.

[Yeboah, Godwin] Univ Aberdeen, Sch Geosci, Ctr Transport Res, Aberdeen, Scotland.

[Druckman, Angela] Univ Surrey, Ctr Environm Strategy, Surrey, England.

RP Torriti, J (reprint author), Univ Reading, Sch Construct Management & Engr, POB 219, Reading RG6 6AW, Berks, England.

EM j.torriti@reading.ac.uk

OI Druckman, Angela/0000-0002-2515-0369; Yeboah, Godwin/0000-0003-4618-3175; Torriti, Jacopo/0000-0003-0569-039X; Anderson, Ben/0000-0003-2092-4406

FU Engineering and Physical Sciences Research Council as part of the RCUK

- Energy Programme [EP/K011723/1]; EDF as part of the R&D ECLEER Programme  
 FX This work was supported by the Engineering and Physical Sciences  
 Research Council [grant number EP/K011723/1] as part of the RCUK Energy  
 Programme and by EDF as part of the R&D ECLEER Programme.
- CR Abrahamse W, 2005, J ENVIRON PSYCHOL, V25, P273, DOI 10.1016/j.jenvp.2005.08.002  
 Anable J, 3 DEMAND CTR  
 Anderson B, 2014, SPATIAL VARIATION EN  
 Anderson T, 2010, NATL TRAVEL SURVEY G  
 Bonke J, 2005, SOC INDIC RES, V70, P349, DOI 10.1007/s11205-004-1547-6  
 Clarkberg M, 2001, AM BEHAV SCI, V44, P1115, DOI 10.1177/00027640121956683  
 COSTANZA R, 1980, SCIENCE, V210, P1219, DOI 10.1126/science.210.4475.1219  
 DECC, 2013, UK HOUS EN FACT FIL  
 De Jong R., 2003, ITSWP0302  
 Department of Energy and Climate Change, 2009, EN CONS UK  
 Department of Trade and Industry, 2006, DIG UK EN STAT DUKES  
 Dill J, UNDERSTANDING MEASUR  
 Druckman A, 2012, ECOL ECON, V84, P153, DOI 10.1016/j.ecolecon.2012.09.008  
 Druckman A, 2009, ECOL ECON, V68, P2066, DOI 10.1016/j.ecolecon.2009.01.013  
 Eibl-Eibesfeldt I., 1970, ETHOLOGY BIOL BEHAV  
 Ellegard K, 2014, BEHAVE EN C 3 4 SEPT  
 ELLEGARD K, 1999, GEOJOURNAL, V48, P167, DOI DOI 10.1023/A:1007071407502  
 Geller H, 2006, ENERG POLICY, V34, P556, DOI 10.1016/j.enpol.2005.11.010  
 Halvorsen B, 2001, RESOUR ENERGY ECON, V23, P1, DOI 10.1016/S0928-7655(00)00035-X  
 HEBERLEIN TA, 1983, J ECON PSYCHOL, V4, P107  
 Ipsos-RSL and Office for National Statistics, 2000, UK TIM US SURV  
 Jacobsen GD, 2012, EUR ECON REV, V56, P946, DOI 10.1016/j.eurocorev.2012.02.008  
 Jenkins SP, 1997, SCOT J POLIT ECON, V44, P153, DOI 10.1111/1467-9485.00050  
 Kan Man Yee, 2007, 200703 ISER U ESS  
 Lopez-Rodriguez MA, 2013, ENERG POLICY, V62, P742, DOI 10.1016/j.enpol.2013.07.095  
 Lutzenhiser L., 1993, ANNU REV ENERG ENV, V18, P259  
 Miranda V, 2011, OECD SOCIAL EMPLOYME, V116  
 Neutens T, 2011, TRANSPORT REV, V31, P25, DOI 10.1080/01441647.2010.484153  
 Office for National Statistics, 2005, ONS OMN SURV TIM US  
 Office for National Statistics, 2014, UK ENV ACC  
 Office for National Statistics, 2008, ENV ACC  
 PALMBORG C, 1986, ENERGY, V11, P643, DOI 10.1016/0360-5442(86)90144-1  
 PARIKH JK, 1995, ENERG POLICY, V23, P745, DOI 10.1016/0301-4215(95)00056-0  
 Raty R, 2010, ENERG POLICY, V38, P646, DOI 10.1016/j.enpol.2009.08.010  
 Richardson I, 2008, ENERG BUILDINGS, V40, P1560, DOI 10.1016/j.enbuild.2008.02.006  
 Richardson I, 2010, ENERG BUILDINGS, V42, P1878, DOI 10.1016/j.enbuild.2010.05.023  
 Ricotta C, 2002, ECOL MODEL, V152, P1, DOI 10.1016/S0304-3800(01)00468-9  
 Shipworth David, 2013, Perspectives on Science, V21, P250, DOI 10.1162/POSC\_a\_00098  
 Shove E, 2010, ENVIRON PLANN A, V42, P1273, DOI 10.1068/a42282  
 Southerton D, 2005, SOCIOL REV, V53, P215, DOI 10.1111/j.1467-954X.2005.00511.x  
 Southerton D, 2003, TIME SOC, V12, P5, DOI 10.1177/0961463X03012001356  
 Southerton D., 2012, TIME SOC, V22, P335, DOI DOI 10.1177/0961463  
 STRBAC G, 2010, BENEFITS ADV SMART M  
 Strengers Y, 2012, ENERG POLICY, V44, P226, DOI 10.1016/j.enpol.2012.01.046  
 Suganthi L., 2011, RENEW SUST ENERG REV, V16, P1223  
 Swan LG, 2009, RENEW SUST ENERG REV, V13, P1819, DOI 10.1016/j.rser.2008.09.033  
 Torriti J, 2014, ECON ENERGY ENV POL, V3, P32  
 Torriti J, 2014, RENEW SUST ENERG REV, V37, P265, DOI 10.1016/j.rser.2014.05.034  
 Torriti J, 2012, ENERGY, V44, P576, DOI 10.1016/j.energy.2012.05.043  
 Vrotsou Katerina, 2011, Human Interface and the Management of Information. Interacting with  
 Information. Proceedings Symposium on Human Interface 2011. Held as Part of HCI International 2011,  
 P170, DOI 10.1007/978-3-642-21793-7\_21  
 Walker G, 2014, ENERGY RES SOC SCI, V1, P49, DOI 10.1016/j.erss.2014.03.012  
 Warren P, 2014, RENEW SUST ENERG REV, V29, P941, DOI 10.1016/j.rser.2013.09.009

Wilke U, 2012, BUILD ENVIRON, V60, P254

Yeboah G, 2015, GEOTECH ENVIRON, V13, P185, DOI 10.1007/978-3-319-11469-9\_8

NR 54

TC 7

Z9 7

U1 0

U2 11

PU SAGE PUBLICATIONS LTD

PI LONDON

PA 1 OLIVERS YARD, 55 CITY ROAD, LONDON EC1Y 1SP, ENGLAND

SN 1420-326X

EI 1423-0070

J9 INDOOR BUILT ENVIRON

J1 Indoor Built Environ.

PD NOV

PY 2015

VL 24

IS 7

SI SI

BP 891

EP 912

DI 10.1177/1420326X15600776

PG 22

WC Construction & Building Technology; Engineering, Environmental; Public,  
Environmental & Occupational Health

SC Construction & Building Technology; Engineering; Public, Environmental &  
Occupational Health

GA CU0KF

UT WOS:000363204300004

DA 2018-05-03

ER

PT J

AU Revel, GM

Arnesano, M

Pietroni, F

Frick, J

Reichert, M

Schmitt, K

Huber, J

Ebermann, M

Battista, U

Alessi, F

AF Revel, Gian Marco

Arnesano, Marco

Pietroni, Filippo

Frick, Juergen

Reichert, Manuela

Schmitt, Katrin

Huber, Jochen

Ebermann, Martin

Battista, Umberto

Alessi, Franck

TI COST-EFFECTIVE TECHNOLOGIES TO CONTROL INDOOR AIR QUALITY AND COMFORT IN  
ENERGY EFFICIENT BUILDING RETROFITTING

SO ENVIRONMENTAL ENGINEERING AND MANAGEMENT JOURNAL

LA English

DT Article; Proceedings Paper

CT 18th International Conference on Trade Fair of Material & Energy  
Recovery and Sustainable Development

CY NOV 05-08, 2014

CL Ecomondo, Rimini, ITALY

HO Ecomondo

DE energy efficiency; gas sensor; HVAC control; indoor air quality; thermal  
comfort

ID SPORTS FACILITIES; ENVIRONMENTS; RISK

AB This paper presents a toolset for the efficient control of the indoor air quality and thermal comfort in retrofitted buildings. The refurbishment of existing buildings, compliant to actual regulations, often leads to airtightness and the consequent poor conditions for the occupants that could cause low productivity and even sickness. For this reason, the CETIEB (Cost Effective Tools for Better Indoor Environment in Retrofitted Energy Efficient Buildings) project developed innovative low-cost solutions to monitor and control the indoor air quality and thermal comfort. Among the technologies developed, this paper presents ad-hoc sensors for the monitoring of Total Volatile Organic Components (TVOC), CO<sub>2</sub> and thermal comfort together with a control logic that, using measured data, provides the optimal rules to actuate the control devices (ventilation, heating/cooling, windows opening, shutters operation and so on). The application and validation of the integrated solution, monitoring plus control logic, was performed in a laboratory building to compare the performance of the proposed solution with the traditional system employed in buildings. The results turned out to show sensors performances comparable with commercial solutions but with a significant reduction of costs. Moreover, the application of the integrated solution showed an improvement of the indoor air quality and comfort with a 15% of energy saving, compared to the traditional thermostatic control.

C1 [Revel, Gian Marco; Arnesano, Marco; Pietroni, Filippo] Univ Politecn Marche, Dept Ind Engr & Math Sci, Ancona, Italy.

[Frick, Juergen; Reichert, Manuela] Univ Stuttgart, Mat Testing Inst Stuttgart, Stuttgart, Germany.

[Schmitt, Katrin; Huber, Jochen] Fraunhofer Inst Phys Measurement Tech, Freiburg, Germany.

[Ebermann, Martin] InfraTec GmbH, Dresden, Germany.

[Battista, Umberto] Stam Srl, Genoa, Italy.

[Alessi, Franck] CEA, INES, Lab Energet Batiment, Le Bourget Du Lac, France.

RP Arnesano, M (reprint author), Univ Politecn Marche, Dept Ind Engr & Math Sci, Ancona, Italy.

EM m.arnesano@univpm.it

OI ARNESANO, MARCO/0000-0003-1700-3075; Revel, Gian  
Marco/0000-0002-3372-7543

FU European Commission [285623]

FX This work is co-funded by the European Commission within the FP7  
European Project CETIEB (Cost - Effective Tools for Better Indoor  
Environment in Retrofitted Energy Efficient Buildings), Grant agreement  
no: 285623.

CR CAPOLONGO S, 2013, ENVIRON ENG MANA S11, V12, P209

European Commission, 2009, LOW EN BUILD EUR CUR

European Commission, 2011, PROM ACT HLTH IND AI

Giusca R, 2009, ENVIRON ENG MANAG J, V8, P1495

Grindvoll Hanne, 2012, WIRELESS SENSOR NETW, V17, P43

Ioan CC, 2012, ENVIRON ENG MANAG J, V11, P879

Kalmar T, 2011, ENVIRON ENG MANAG J, V10, P1249

Mendell MJ, 2007, INDOOR AIR, V17, P259, DOI 10.1111/j.1600-0668.2007.00478.x

Myhrvold AN, 1996, INDOOR AIR, V4, P369

Perez-Lombard L, 2008, ENERG BUILDINGS, V40, P394, DOI 10.1016/j.enbuild.2007.03.007

Revel GM, 2014, MEASUREMENT, V55, P382, DOI 10.1016/j.measurement.2014.05.027

Revel GM, 2014, MEAS SCI TECHNOL, V25, DOI 10.1088/0957-0233/25/8/085101

Revel G. M., 2013, Environmental Engineering and Management Journal, V12, P229

Revel GM, 2012, MEAS SCI TECHNOL, V23, DOI 10.1088/0957-0233/23/3/035005

Revel GM, 2014, BUILD ENVIRON, V77, P12, DOI 10.1016/j.buildenv.2014.03.017

Revel G.M., 2014, P INT C QIRT 2014

Sharpe RA, 2015, ENVIRON INT, V75, P234, DOI 10.1016/j.envint.2014.11.017

Yang KH, 1997, BUILD ENVIRON, V32, P25, DOI 10.1016/S0360-1323(96)00027-3

NR 18



TC 7  
Z9 7  
U1 0  
U2 12  
PU GH ASACHI TECHNICAL UNIV IASI  
PI IASI  
PA 71 MANGERON BLVD, IASI, 700050, ROMANIA  
SN 1582-9596  
EI 1843-3707  
J9 ENVIRON ENG MANAG J  
JI Environ. Eng. Manag. J.  
PD JUL  
PY 2015  
VL 14  
IS 7  
BP 1487  
EP 1494  
PG 8  
WC Environmental Sciences  
SC Environmental Sciences & Ecology  
GA CQ3KH  
UT WOS:000360500300003  
DA 2018-05-03  
ER

PT J  
AU Wang, XT  
    Lu, MJ  
    Mao, W  
    Ouyang, JL  
    Zhou, B  
    Yang, YK  
AF Wang, Xiaotong  
    Lu, Meijun  
    Mao, Wei  
    Ouyang, Jinlong  
    Zhou, Bo  
    Yang, Yunkai

TI Improving benefit-cost analysis to overcome financing difficulties in promoting energy-efficient renovation of existing residential buildings in China

SO APPLIED ENERGY

LA English

DT Article

DE Financing; Benefit-cost analysis; Cost-effectiveness; Win-win

ID NORTHERN HEATING REGION; ECONOMIC-ANALYSIS; RETROFIT; CONSUMPTION; PERFORMANCE; SAVINGS; SYSTEM; SECTOR; WINTER; AREAS

AB Energy-efficient renovation of existing residential buildings is an important energy policy in China, but financing difficulties seriously hinder the promotion of the policy. In this article, novel indices based on benefit-cost analysis are presented to overcome the barriers. Firstly, benefit-cost analysis is expanded to include the ratio of energy-saving benefit to investment cost (EnIR), the ratio of environmental benefit to investment cost (EvIR), and the ratio of economic benefit to investment cost (EcIR). The above ratios are applied to determine the optimum plans with the highest cost-effectiveness for the buildings to be renovated. Secondly, according to the actual situation regarding both the government and residents, EnIR is modified to the ratio of energy-saving benefit from the retrofit plan to the part of the investment cost undertaken by the government (EnIgR), EvIR to the ratio of environmental benefit from the retrofit plan to the part of the investment cost undertaken by the government (EvIgR), and EcIR to the ratio of economic benefit from the retrofit plan to the part of the investment cost undertaken by residents (EcIrR). The

modified ratios can increase awareness of residents in respect of their individual benefits from the adoption of the optimum plans, and can attract them to co-invest. Through these two steps, financing difficulties could be eased or even no longer considered as obstacles to some extent. The ratios are applied to a case study building in Hangzhou. Based on the results, a "win-win" model, consistent with market principles, is developed, in which both the government and residents can co-invest and co-benefit. The model has proven to be an effective decision-making tool in promoting the building renovation policy in China. (C) 2014 Elsevier Ltd. All rights reserved.

C1 [Wang, Xiaotong; Mao, Wei; Ouyang, Jinlong; Zhou, Bo] Sichuan Univ, Coll Architecture & Environm, Chengdu 610065, Peoples R China.

[Wang, Xiaotong] Southwest Univ Sci & Technol, Sch Literature & Art, Mianyang 621010, Peoples R China.

[Lu, Meijun] North China Inst Water Conservancy & Hydroelect, Dept Architecture, Zhengzhou 450008, Peoples R China.

[Mao, Wei; Yang, Yunkai] China CMCU Engn Corp CMCU, Chongqing 400039, Peoples R China.

RP Ouyang, JL (reprint author), Sichuan Univ, Coll Architecture & Environm, Chengdu 610065, Peoples R China.

EM ow761202@scu.edu.cn

FU Scientific Research Foundation for the Returned Overseas Chinese Scholars, State Education Ministry [2012940-15-8]

FX The work in this paper was supported by the Scientific Research Foundation for the Returned Overseas Chinese Scholars, State Education Ministry (No. 2012940-15-8). We would like to thank the anonymous reviewers and the editors for their valuable suggestions and comments.

CR Amstalden RW, 2007, ENER POLICY, V35, P1819, DOI 10.1016/j.enpol.2006.05.018

Baek C, 2012, RENEW SUST ENER REV, V16, P3939, DOI 10.1016/j.rser.2012.03.046

Bao LL, 2012, ENER POLICY, V45, P521, DOI 10.1016/j.enpol.2012.02.065

Bin G, 2012, APPL ENER, V93, P24, DOI 10.1016/j.apenergy.2011.05.055

Burhenne S, 2013, BUILD ENVIRON, V62, P143, DOI 10.1016/j.buildenv.2013.01.013

Chau CK, 2000, BUILD ENVIRON, V35, P307, DOI 10.1016/S0360-1323(99)00024-4

[?? Chen Hong], 2004, [?????], Acta Scientiae Circumstantiae, V24, P545

Chidiac SE, 2011, ENERGY, V36, P5037, DOI 10.1016/j.energy.2011.05.050

China Academy of Building Research Chongqing University Ministry of Housing and Urban-rural Development of China, 2001, DES STAND EN EFF RES

[Anonymous], 2005, SPEC CLIM DAT SET AN

Galvin R, 2014, ENER BUILDINGS, V69, P515, DOI 10.1016/j.enbuild.2013.11.004

Ghajar RF, 2003, APPL ENER, V76, P25, DOI 10.1016/S0306-2619(03)00044-8

Gong Zhiqi, 2004, Journal of Tsinghua University (Science and Technology), V44, P1209

Gu Daojin, 2006, Journal of Tsinghua University (Science and Technology), V46, P1953

Hangzhou Statistics Bureau, 2012, HANGZH STAT YB 2012

Kragh J, 2011, APPL ENER, V88, P2245, DOI 10.1016/j.apenergy.2010.12.049

Kumbaroglu G, 2012, ENER BUILDINGS, V49, P327, DOI 10.1016/j.enbuild.2012.02.022

Lazarevic D, 2010, RESOUR CONSERV RECY, V55, P246, DOI 10.1016/j.resconrec.2010.09.014

Lee WL, 2003, ENERGY, V28, P877, DOI 10.1016/S0360-5442(03)00005-7

Li M, 2013, ENER POLICY, V61, P1178, DOI 10.1016/j.enpol.2013.06.068

Li S, 2005, J HUAZHONG U SCI TEC, V22, P54

Liang CZ, 2012, ENRGY PROCED, V16, P983, DOI 10.1016/j.egypro.2012.01.157

Liu S, 2002, THESIS WUHAN U TECHN

Liu Y, 2011, STUDY EC INCENTIVE I

Liu YM, 2013, ENER BUILDINGS, V61, P61, DOI 10.1016/j.enbuild.2013.01.033

Lu S, 2007, HV AC, V37, P20

Lv SL, 2009, ENER POLICY, V37, P2102, DOI 10.1016/j.enpol.2008.11.042

Ma ZJ, 2012, ENER BUILDINGS, V55, P889, DOI 10.1016/j.enbuild.2012.08.018

Mahapatra K, 2013, APPL ENER, V112, P1558, DOI 10.1016/j.apenergy.2013.01.010

Ministry of Construction of China, 1986, GBJ961986 MIN CONSTR

Ministry of Finance of China, 2008, REW FUND MAN INT PRO

Ministry of Finance of China, 2012, REW FUND MAN INT PRO

Ministry of Housing and Urban-rural Development of China, 2012, GUID EX RES BUILD EN

Nair G, 2010, APPL ENER, V87, P2411, DOI 10.1016/j.apenergy.2010.02.004

Ouyang JL, 2011, ENER POLICY, V39, P4902, DOI 10.1016/j.enpol.2011.06.025  
 Ouyang JL, 2010, ENERGY, V35, P5269, DOI 10.1016/j.energy.2010.07.038  
 Ouyang JL, 2009, ENER BUILDINGS, V41, P711, DOI 10.1016/j.enbuild.2009.02.003  
 Ouyang JL, 2009, ENER POLICY, V37, P140, DOI 10.1016/j.enpol.2008.07.041  
 Popescu D, 2012, APPL ENER, V89, P454, DOI 10.1016/j.apenergy.2011.08.015  
 Siller T, 2007, ENER POLICY, V35, P529, DOI 10.1016/j.enpol.2005.12.021  
 The State Council of China, 2012, 12 5 YEAR PLAN EN EF  
 Yan D, 2011, ENER POLICY, V39, P4675, DOI 10.1016/j.enpol.2011.07.004  
 Yang L, 2014, APPL ENER, V115, P164, DOI 10.1016/j.apenergy.2013.10.062  
 Yu JH, 2009, APPL ENER, V86, P2520, DOI 10.1016/j.apenergy.2009.03.010  
 Zhao J, 2009, ENER POLICY, V37, P2124, DOI 10.1016/j.enpol.2008.11.044  
 Zhao P, 2004, CHINA BUILD MAT SCI, V13, P1  
 Zhong P, 2005, STUDY BUILDING LIFE, P41

NR 47

TC 7

Z9 7

U1 2

U2 23

PU ELSEVIER SCI LTD

PI OXFORD

PA THE BOULEVARD, LANGFORD LANE, KIDLINGTON, OXFORD OX5 1GB, OXON, ENGLAND

SN 0306-2619

EI 1872-9118

J9 APPL ENER

J1 Appl. Energy

PD MAR 1

PY 2015

VL 141

BP 119

EP 130

DI 10.1016/j.apenergy.2014.12.001

PG 12

WC Energy & Fuels; Engineering, Chemical

SC Energy & Fuels; Engineering

GA CB8LF

UT WOS:000349880400012

DA 2018-05-03

ER

PT J

AU Kavousian, A

Rajagopal, R

AF Kavousian, Amir

Rajagopal, Ram

TI Data-Driven Benchmarking of Building Energy Efficiency Utilizing

Statistical Frontier Models

SO JOURNAL OF COMPUTING IN CIVIL ENGINEERING

LA English

DT Article

DE Energy efficiency; Stochastic processes; Benchmark; Data analysis;

Energy efficiency; Stochastic ranking; Data-driven benchmarking; Data

envelopment analysis; Energy-efficient frontier

ID CONSERVATION; INDICATORS; NETWORK

AB Frontier methods quantify the energy efficiency of buildings by forming an efficient frontier (best-practice technology) and by comparing all buildings against that frontier. Because energy consumption fluctuates over time, the efficiency scores are stochastic random variables. Existing applications of frontier methods in energy efficiency either treat efficiency scores as deterministic values or estimate their uncertainty by resampling from one set of measurements. Availability of smart meter data (repeated measurements of

energy consumption of buildings) enables using actual data to estimate the uncertainty in efficiency scores. Additionally, existing applications assume a linear form for an efficient frontier; i.e., they assume that the best-practice technology scales up and down proportionally with building characteristics. However, previous research shows that buildings are nonlinear systems. This paper proposes a statistical method called stochastic energy efficiency frontier (SEEF) to estimate a bias-corrected efficiency score and its confidence intervals from measured data. The paper proposes an algorithm to specify the functional form of the frontier, identify the probability distribution of the efficiency score of each building using measured data, and rank buildings based on their energy efficiency. To illustrate the power of SEEF, this paper presents the results from applying SEEF on a smart meter data set of 307 residential buildings in the United States. SEEF efficiency scores are used to rank individual buildings based on energy efficiency, to compare subpopulations of buildings, and to identify irregular behavior of buildings across different time-of-use periods. SEEF is an improvement to the energy-intensity method (comparing kWh/sq.ft.): whereas SEEF identifies efficient buildings across the entire spectrum of building sizes, the energy-intensity method showed bias toward smaller buildings. The results of this research are expected to assist researchers and practitioners compare and rank (i.e., benchmark) buildings more robustly and over a wider range of building types and sizes. Eventually, doing so is expected to result in improved resource allocation in energy-efficiency programs.

C1 [Kavousian, Amir] Stanford Univ, Stanford, CA 94305 USA.

[Rajagopal, Ram] Stanford Univ, Dept Civil & Environm Engr, Stanford Sustainable Syst Lab, Stanford, CA 94305 USA.

RP Rajagopal, R (reprint author), Stanford Univ, Dept Civil & Environm Engr, Stanford Sustainable Syst Lab, Stanford, CA 94305 USA.

EM amirk@stanford.edu; ram.rajagopal@stanford.edu

FU Advanced Research Projects Agency-Energy (ARPA-E); Powell Foundation; TomKat Center for Sustainable Energy

FX Amir Kavousian was funded through an Advanced Research Projects Agency-Energy (ARPA-E) grant to Stanford University. Ram Rajagopal was supported by the Powell Foundation Fellowship and TomKat Center for Sustainable Energy. The authors would like to thank Professor Martin Fischer, Professor James Sweeney, Dr. June Flora, Dr. Carrie Armel, and Professor Pravin Varaiya for their helpful inputs and comments during this study. The authors would also like to thank Rene Morkos, Taewan Kim, Austin Becker, and Forest Peterson for their feedback on the level of service discussion, and the respected reviewers for their helpful comments on the paper.

CR Ahn C., 2010, SUSTAINABILITY, V2, P354

Aigner D., 1977, J ECONOMETRICS, V6, P21, DOI [DOI 10.1016/0304-4076(77)90052-5, 10.1016/0304-4076(77)90052-5]

Atkinson B. A. C., 1982, J R STAT SOC, V44, P1

Azar E, 2012, J COMPUT CIVIL ENG, V26, P506, DOI 10.1061/(ASCE)CP.1943-5487.0000158

Berges M, 2011, J COMPUT CIVIL ENG, V25, P471, DOI 10.1061/(ASCE)CP.1943-5487.0000108

CAPASSO A, 1994, IEEE T POWER SYST, V9, P957, DOI 10.1109/59.317650

Carnes D., 1998, P 1998 SUMM STUD BUI

Chen JY, 2012, ENERG BUILDINGS, V47, P515, DOI 10.1016/j.enbuild.2011.12.026

Clevenger C., 2012, J ENG DESIGN ELECT, V24, P165

FARRELL MJ, 1957, J R STAT SOC SER A-G, V120, P253, DOI 10.2307/2343100

Griffith B., 2006, P SIMBUILD 2006 C

Grosche P, 2009, J PROD ANAL, V31, P87, DOI 10.1007/s11123-008-0121-7

Houde S., 2012, ENERGY, V34, P1

Kavousian A, 2013, ENERGY, V55, P184, DOI 10.1016/j.energy.2013.03.086

Lutzenhiser L., 2010, ACEEE SUMM STUD EN E

Maile T., 2010, THESIS STANFORD U ST

Onut S, 2006, ENERG BUILDINGS, V38, P964, DOI 10.1016/j.enbuild.2005.11.006

Pacific Gas and Electric, 2013, EL RAT SCHED

Patterson MG, 1996, ENERG POLICY, V24, P377, DOI 10.1016/0301-4215(96)00017-1

Phylipsen GJM, 1997, ENERG POLICY, V25, P715, DOI 10.1016/S0301-4215(97)00063-3

Pisello AL, 2012, BUILD ENVIRON, V58, P37, DOI 10.1016/j.buildenv.2012.06.017

Pacific Northwest National Lab (PNNL) and Oak Ridge National Laboratory (ORNL), 2010, BUILD AM BEST PRACT, V7.1  
 Riani M, 2000, TECHNOMETRICS, V42, P384, DOI 10.2307/1270948  
 Savage S., 2009, FLAW AVERAGES WHY WE  
 SCHIPPER L, 1983, ENERGY, V8, P7, DOI 10.1016/0360-5442(83)90004-X  
 Simar L, 1999, J PROD ANAL, V11, P67, DOI 10.1023/A:1007735422028  
 Waltner M., 2012, P 2012 SUMM STUD BUI  
 Xydis G., INT J ENERGY TECHNOL, V6, P474  
 Yezioro A, 2008, ENERGBUILDINGS, V40, P612, DOI 10.1016/j.enbuild.2007.04.014

NR 29  
 TC 7  
 Z9 7  
 U1 1  
 U2 22  
 PU ASCE-AMER SOC CIVIL ENGINEERS  
 PI RESTON  
 PA 1801 ALEXANDER BELL DR, RESTON, VA 20191-4400 USA  
 SN 0887-3801  
 EI 1943-5487  
 J9 J COMPUT CIVIL ENG  
 IJ J. Comput. Civil. Eng.  
 PD JAN 1  
 PY 2014  
 VL 28  
 IS 1  
 BP 79  
 EP 88  
 DI 10.1061/(ASCE)CP.1943-5487.0000327  
 PG 10  
 WC Computer Science, Interdisciplinary Applications; Engineering, Civil  
 SC Computer Science; Engineering  
 GA AD7LT  
 UT WOS:000333446100008  
 DA 2018-05-03  
 ER

PT J  
 AU Kleinschafer, J  
 Morrison, M  
 AF Kleinschafer, Jodie  
 Morrison, Mark  
 TI Household norms and their role in reducing household electricity consumption  
 SO INTERNATIONAL JOURNAL OF CONSUMER STUDIES  
 LA English  
 DT Article  
 DE Decision making; efficiency champion; environment  
 ID SOCIAL-INFLUENCE; DECISION-MAKING; BEHAVIOR  
 AB Researchers have only recently begun to investigate the role of the norms of the household or family group in energy-efficiency decisions. These researchers have demonstrated that these norms can influence the behaviour and attitudes of children within the household. We contribute to their findings by providing a characterization of the use of household norms in household decisions about electricity efficiency. For our qualitative research, we conducted focus groups with three different household types: (1) share houses/young couples with no children; (2) households with children; and (3) empty nest/elderly households in three regional centres in New South Wales, Australia (total of 76 respondents in nine focus groups). Specifically, we found that household norms were evident in the decision-making process through rules and expectations about behaviour and the use of sanctions to enforce or shaped that behaviour. We identified several drivers of household norms including a household member taking the

role of efficiency champion' and the occurrence of critical incidents in the household. In addition, we found that household members try to establish household norms to socialize household members with the goal of the intergenerational transmission of desirable behaviours. Based on these observations, we conclude that household members employ norms to regulate and reduce their electricity consumption, and as a mechanism for consumer socialization. As such, our findings are important for marketers and policy makers tasked with regulating household consumption.

C1 [Kleinschafer, Jodie; Morrison, Mark] Charles Sturt Univ, Sch Management & Mkt, Bathurst, NSW 2795, Australia.

RP Kleinschafer, J (reprint author), Charles Sturt Univ, Sch Management & Mkt, Panorama Ave, Bathurst, NSW 2795, Australia.

EM jkleinschafer@csu.edu.au

CR Belch M.A., 2002, J CONSUM BEHAV, V2, P111, DOI [10.1002/cb.94, DOI 10.1002/CB.94]

BLACK JS, 1985, J APPL PSYCHOL, V70, P3, DOI 10.1037//0021-9010.70.1.3

Braun V., 2007, QUALITATIVE RES PSYC, V3, P77, DOI DOI 10.1191/1478088706QP0630A

CHILDERS TL, 1992, J CONSUM RES, V19, P198, DOI 10.1086/209296

Chiovitti RF, 2003, J ADV NURS, V44, P427, DOI 10.1046/j.0309-2402.2003.02822.x

Clancy D., 2002, INT J NONPROFIT VOLU, V7, P258, DOI DOI 10.1002/NVSM.184

Commuri Suraj, 2000, ACAD MARKETING SCI R, V8, P1

Crossley D., 2006, DEM RESP DSM C 27 MA

DAVIS HL, 1974, J CONSUM RES, V1, P51, DOI 10.1086/208581

DAVIS HL, 1976, J CONSUM RES, V2, P241, DOI 10.1086/208639

Ek K, 2010, ENERG POLICY, V38, P1578, DOI 10.1016/j.enpol.2009.11.041

Ek K, 2008, ECOL ECON, V68, P169, DOI 10.1016/j.ecolecon.2008.02.013

Erasmus AC, 2003, ADV CONSUM RES, V30, P332

FELDMAN DC, 1984, ACAD MANAGE REV, V9, P47, DOI 10.2307/258231

Gladhart P.M., 1982, J CONSUMER STUDIES H, V6, P205

Goldsmith EB, 2011, INT J CONSUM STUD, V35, P117, DOI 10.1111/j.1470-6431.2010.00965.x

Gronhoj A., 2007, J CONSUM BEHAV, V6, P218, DOI DOI 10.1002/CB.2L6

Gronhoj A., 2006, J CONSUM BEHAV, V5, P491, DOI DOI 10.1002/CB.198

Gronhoj A, 2012, J ECON PSYCHOL, V33, P292, DOI 10.1016/j.joep.2011.10.001

Gronhoj A, 2011, INT J CONSUM STUD, V35, P138, DOI 10.1111/j.1470-6431.2010.00967.x

Gronhoj A, 2009, J ENVIRON PSYCHOL, V29, P414, DOI 10.1016/j.jenvp.2009.05.002

Hamilton K. L., 2008, EUROPEAN ADV CONSUME, V8, P43

Kim CK, 1996, J BUS RES, V36, P157, DOI 10.1016/0148-2963(95)00102-6

Kirchler E, 1999, APPL PSYCHOL-INT REV, V48, P329, DOI 10.1111/j.1464-0597.1999.tb00005.x

Kirchler E., 2001, CONFLICT DECISION MA

Lanasa John M., 1993, PSYCHOL MARK, V10, P81, DOI DOI 10.1002/(ISSN)1520-6793

Matthies E, 2012, J ENVIRON PSYCHOL, V32, P277, DOI 10.1016/j.jenvp.2012.04.003

Nelson M. C., 1988, ADV CONSUM RES, V15, P436

PARK CW, 1982, J CONSUM RES, V9, P151, DOI 10.1086/208908

Patton M. Q., 1990, QUALITATIVE EVALUATI

QUALLS WJ, 1992, ADV CONSUM RES, V19, P522

Qualls W. J., 1988, ADV CONSUM RES, V15, P442

Salazar HA, 2013, INT J CONSUM STUD, V37, P172, DOI 10.1111/j.1470-6431.2012.01110.x

SCHANINGER CM, 1986, SEX ROLES, V15, P77, DOI 10.1007/BF00287533

Sonderegger R.C., 1978, SAVING ENERGY HOME P, P207

SPIRO RL, 1983, J CONSUM RES, V9, P393, DOI 10.1086/208933

Stern PC, 2000, J SOC ISSUES, V56, P407, DOI 10.1111/0022-4537.00175

Thogersen J, 2010, ENERG POLICY, V38, P7732, DOI 10.1016/j.enpol.2010.08.025

Ward C. B., 2005, J APPL BUSINESS RES, V21, P9

Wood L., 2004, J CONSUM BEHAV, V4, P9, DOI DOI 10.1002/CB.154

NR 40

TC 7

Z9 7

U1 1

U2 17

PU WILEY-BLACKWELL

PI HOBOKEN

PA 111 RIVER ST, HOBOKEN 07030-5774, NJ USA  
SN 1470-6423  
EI 1470-6431  
J9 INT J CONSUM STUD  
JI Int. J. Consum. Stud.  
PD JAN  
PY 2014  
VL 38  
IS 1  
BP 75  
EP 81  
DI 10.1111/ijcs.12066  
PG 7  
WC Business  
SC Business & Economics  
GA 286WZ  
UT WOS:000329501300011  
DA 2018-05-03  
ER

PT J

AU Osello, A

Acquaviva, A

Aghemo, C

Blaso, L

Dalmaso, D

Erba, D

Fracastoro, G

Gondre, D

Jahn, M

Macii, E

Patti, E

Pellegrino, A

Piumatti, P

Pramudianto, F

Savoyat, J

Spirito, M

Tomasi, R

Virgone, J

AF Osello, Anna

Acquaviva, Andrea

Aghemo, Chiara

Blaso, Laura

Dalmaso, Daniele

Erba, David

Fracastoro, Giovanni

Gondre, Damien

Jahn, Marco

Macii, Enrico

Patti, Edoardo

Pellegrino, Anna

Piumatti, Paolo

Pramudianto, Ferry

Savoyat, Jerme

Spirito, Maurizio

Tomasi, Riccardo

Virgone, Joseph

TI Energy saving in existing buildings by an intelligent use of

interoperable ICTs

SO ENERGY EFFICIENCY

LA English

DT Article

DE Interoperability; Middleware; Wireless Sensor and Actuator Networks;  
Building management system; Building information modelling; Energy  
awareness and efficiency

AB In this paper, we report a methodology, developed in the context of Smart Energy Efficient Middleware for Public Spaces European Project, aimed at exploiting ICT monitoring and control services to reduce energy usage and CO2 footprint in existing buildings. The approach does not require significant construction work as it is based on commercial-off-the-shelf devices and, where present, it exploits and integrates existing building management systems with new sensors and actuator networks. To make this possible, the proposed approach leverages upon the following main contributions: (a) to develop an integrated building automation and control system, (b) to implement a middleware for the energy-efficient buildings domain, (c) to provide a multi-dimensional building information modelling-based visualisation, and (d) to raise people's awareness about energy efficiency. The research approach adopted in the project started with the selection, as case studies, of representative test and reference rooms in modern and historical buildings chosen for having different requirements and constraints in term of sensing and control technologies. Then, according to the features of the selected rooms, the strategies to reduce the energy consumptions were defined, taking into account the potential savings related to lighting, heating, ventilation, and air conditioning (HVAC) systems and other device loads (PC, printers, etc.). The strategies include both the control of building services and devices and the monitoring of environmental conditions and energy consumption. In the paper, the energy savings estimated through simulation, for both HVAC and lighting, are presented to highlight the potential of the designed system. After the implementation of the system in the demonstrator, results will be compared with the monitored data.

C1 [Osello, Anna; Acquaviva, Andrea; Aghemo, Chiara; Blaso, Laura; Dalmasso, Daniele; Erba, David; Fracastoro, Giovanni; Macii, Enrico; Patti, Edoardo; Pellegrino, Anna; Piumatti, Paolo] Politecn Torino, Turin, Italy.

[Gondre, Damien; Savoyat, Jerme; Virgone, Joseph] Univ Lyon 1, F-69365 Lyon, France.

[Jahn, Marco; Pramudianto, Ferry] Fraunhofer Inst Appl Informat Technol FIT, St Augustin, Germany.

[Spirito, Maurizio; Tomasi, Riccardo] ISMB, Turin, Italy.

RP Osello, A (reprint author), Politecn Torino, Turin, Italy.

EM anna.osello@polito.it

OI Patti, Edoardo/0000-0002-6043-6477; Tomasi, Riccardo/0000-0001-9594-3834

FU EU

FX The research is funded by EU, FP7 Collaborative project- 2010: SEEMPubS.

CR Autodesk Ecotect Analysis, 2013, AUT EC AN

Autodesk Revit, 2013, AUT REV

ebbits Project, 2010, BUS BAS INT THINGS S

Eisenhauer M., 2011, 2 WORKSH EEBUILDINGS

Eisenhauer Markus, 2009, SENS MESH AD HOC COM, P1, DOI DOI 10.1109/SAHCNW.2009.5172913

Fracastoro G. V., 2012, 5 INT BUILD PHYS C I, P825

Larson G. W., 1998, RENDERING RADIANCE A

Lee ES, 2006, ENERGBUILDINGS, V38, P914, DOI 10.1016/j.enbuild.2006.03.019

Li DHW, 2010, APPL ENERGB, V87, P558, DOI 10.1016/j.apenergy.2009.07.002

Milagro F., 2008, INT THINGS WORKSH

Osello A., 2012, DATA STANDARDIZATION, P189

Plugwise, 2006, SMART WIR SOL EN SAV

Reinhart CF, 2004, SOL ENERGY, V77, P15, DOI 10.1016/j.solener.2004.04.003

Reinhart CF, 2001, THESIS TU KARLSRUHE

ST Microelectronics Smart Plug, 2013, ST MICR SMART PLUG

[Anonymous], 2011, TEX INSTR CC2530 DAT

Yun GY, 2012, ENERGBUILDINGS, V46, P152, DOI 10.1016/j.enbuild.2011.10.034

[Anonymous], 2003, CROSSB TEL REV B DAT

NR 18

TC 7

Z9 7

U1 1



U2 50  
 PU SPRINGER  
 PI DORDRECHT  
 PA VAN GODEWIJCKSTRAAT 30, 3311 GZ DORDRECHT, NETHERLANDS  
 SN 1570-646X  
 J9 ENER EFFIC  
 JI Energy Effic.  
 PD NOV  
 PY 2013  
 VL 6  
 IS 4  
 SI SI  
 BP 707  
 EP 723  
 DI 10.1007/s12053-013-9211-0  
 PG 17  
 WC GREEN & SUSTAINABLE SCIENCE & TECHNOLOGY; Energy & Fuels; Environmental  
 Studies  
 SC Science & Technology - Other Topics; Energy & Fuels; Environmental  
 Sciences & Ecology  
 GA 227MD  
 UT WOS:000325116300008  
 DA 2018-05-03  
 ER

PT J  
 AU Nassen, J  
 Holmberg, J  
 AF Nassen, Jonas  
 Holmberg, John  
 TI On the potential trade-offs between energy supply and end-use  
 technologies for residential heating  
 SO ENERGY POLICY  
 LA English  
 DT Article  
 DE Energy efficiency; District heating; CO2 emissions  
 ID SWEDISH BUILDING SECTOR; CONSERVATION; EFFICIENCY; SYSTEMS; BIOMASS;  
 EXAMPLE; FUELS

AB In Sweden, where district heating accounts for a significant share of residential heating, it has been argued that improvements in end-use energy efficiency may be counter-productive since such measures reduce the potential of energy efficient combined heat and power production. In this paper we model how the potential trade-offs between energy supply and end-use technologies depend on climate policy and energy prices. The model optimizes a combination of energy efficiency measures, technologies and fuels for heat supply and district heating extensions over a 50 year period. We ask under what circumstances improved end-use efficiency may be cost-effective in buildings connected to district heating? The answer hinges on the available technologies for electricity production. In a scenario with no alternatives to basic condensing electricity production, high CO2 prices result in very high electricity prices, high profitability of combined heat and power production, and little incentive to reduce heat demand in buildings with district heating. In contrast, in a scenario where electricity production alternatives with low CO2 emissions are available, the electricity price will level out at high CO2 prices. This gives heat prices that increase with the CO2 price and make end-use efficiency cost-effective also in buildings with district heating. (c) 2013 Elsevier Ltd. All rights reserved.

C1 [Nassen, Jonas; Holmberg, John] Chalmers, Dept Energy & Environm, SE-41296 Gothenburg, Sweden.  
 RP Nassen, J (reprint author), Chalmers, Dept Energy & Environm, SE-41296 Gothenburg, Sweden.  
 EM jonasna@chalmers.se  
 OI Nassen, Jonas/0000-0002-1564-8585  
 FU AES program at the Swedish National Energy Administration; Swedish  
 Research Council for Environment, Agricultural Sciences and Spatial

## Planning (Formas)

FX Funding from the AES program at the Swedish National Energy Administration, and the Swedish Research Council for Environment, Agricultural Sciences and Spatial Planning (Formas) is gratefully acknowledged. Thanks to Sten Karlsson for comments on the manuscript and to Paulina Essunger for language editing.

CR Aberg M, 2012, ENERGY, V41, P525, DOI 10.1016/j.energy.2012.02.034

Axelsson E., 2012, FJARRVARMESSEKTORNS P

Azar C, 2006, CLIMATIC CHANGE, V74, P47, DOI 10.1007/s10584-005-3484-7

Azar C, 2003, ENER POLICY, V31, P961, DOI 10.1016/S0301-4215(02)00139-8

Berndes G, 2007, ENER POLICY, V35, P5965, DOI 10.1016/j.enpol.2007.08.003

Capros P, 2010, EU ENERGY TRENDS 203

Difs K, 2010, ENERGY, V35, P3194, DOI 10.1016/j.energy.2010.04.001

DTI (Department of Trade and Industry), 2006, EN CHALL EN REV REP

Ericsson K, 2004, BIOMASS BIOENERG, V26, P205, DOI 10.1016/S0961-9534(03)00122-3

EWEA, 2013, WIND POW 2012 EUR ST

Friesen C, 2012, PLAN THEORY PRACT, V13, P115

GILIJAMSE W, 1995, ENER BUILDINGS, V23, P49, DOI 10.1016/0378-7788(95)00918-N

Grahn M, 2007, BIOMASS BIOENERG, V31, P747, DOI 10.1016/j.biombioe.2007.05.001

GUSTAFSSON SI, 1990, HEAT RECOV SYST CHP, V10, P151, DOI 10.1016/0890-4332(90)90168-J

GUSTAFSSON SI, 1992, ENERGY, V17, P161, DOI 10.1016/0360-5442(92)90065-8

International Energy Agency, 2011, WORLD EN OUTL 2011

Larsson L, 2002, 200274 FOU SVENSK FJ

Nassen J, 2005, ENER POLICY, V33, P1037, DOI 10.1016/j.enpol.2003.11.004

Nassen J, 2008, ENER POLICY, V36, P3814, DOI 10.1016/j.enpol.2008.07.018

Rolfman B, 2004, ENER CONVERS MANAGE, V45, P595, DOI 10.1016/S0196-8904(03)00174-2

Rolfman B, 2003, INT J ENER RES, V27, P31, DOI 10.1002/er.857

RYDEN B, 1993, ENER POLICY, V21, P176, DOI 10.1016/0301-4215(93)90139-7

Sandberg B., 2003, VAD KOSTAR SMAHUSANS, P4

Schnieders E, 2006, ENER POLICY, V34, P151, DOI 10.1016/j.enpol.2004.08.049

Spath P., 2005, ECEEE SUMM STUD P EC

Statistics Sweden, 2012, 21SM1201 BO STAT SWE

Statistics Sweden, 2012, BO14 STAT SWED

Swedish Energy Agency/Swedish Consumer Agency, 2006, MARKN VARM SMAH

Swedish Energy Agency, 2011, 201111 ES SWED EN AG

Swedish Energy Agency, 2009, 200908 ES SWED EN AG

Swedish Energy Agency, 2009, 200907 ES SWED EN AG

Swedish Energy Agency, 2006, 200625 ET SWED EN AG

Thyholt M, 2008, ENER BUILDINGS, V40, P131, DOI 10.1016/j.enbuild.2007.01.016

WENE CO, 1980, INT J ENER RES, V4, P271, DOI 10.1002/er.4440040309

Wene C. O., 1981, P IEA C NEW EN CONS

Wijk S., 2005, MARKNADENS INTRESSE

NR 36

TC 7

Z9 7

U1 0

U2 15

PU ELSEVIER SCI LTD

PI OXFORD

PA THE BOULEVARD, LANGFORD LANE, KIDLINGTON, OXFORD OX5 1GB, OXON, ENGLAND

SN 0301-4215

EI 1873-6777

J9 ENER POLICY

JI Energy Policy

PD AUG

PY 2013

VL 59

BP 470

EP 480

DI 10.1016/j.enpol.2013.03.059

PG 11

WC Economics; Energy & Fuels; Environmental Sciences; Environmental Studies

SC Business & Economics; Energy & Fuels; Environmental Sciences & Ecology

GA 202QW

UT WOS:000323235700042

DA 2018-05-03

ER

PT J

AU Sovacool, BK

AF Sovacool, Benjamin K.

TI Security of energy services and uses within urban households

SO CURRENT OPINION IN ENVIRONMENTAL SUSTAINABILITY

LA English

DT Review

ID CONSUMPTION; CHALLENGE; SYSTEMS

AB This article explores how the security of energy services and uses differs according to the socio-demographic nature of households. The article begins by defining energy services and distinguishing them from primary energy, end-use energy, and useful energy. It then proposes an 'energy services ladder' that tracks the primary fuels and technologies, services and end-uses they provide, and broader driving factors associated with energy use at lower-income, middle-income, and upper-income households, with energy security vulnerabilities. The article does not analyze rural energy services, energy services for commercial firms or industries, indirect energy services, or potential gains from future energy transitions. The final part of the article offers implications for energy policy and energy studies.

C1 Natl Univ Singapore, Ctr Asia & Globalisat, Lee Kuan Yew Sch Publ Policy, Singapore 259772, Singapore.

RP Sovacool, BK (reprint author), Natl Univ Singapore, Ctr Asia & Globalisat, Lee Kuan Yew Sch Publ Policy, 469C Bukit Timah Rd, Singapore 259772, Singapore.

EM bsovacool@nus.edu.sg

OI Sovacool, Benjamin/0000-0002-4794-9403

CR Barnes DF, 1996, ANNU REV ENERG ENV, V21, P497, DOI 10.1146/annurev.energy.21.1.497

Baudrillard J., 1970, CONSUMER SOC MYTHS S

Beniger James, 1986, CONTROL REVOLUTION T

Dianshu F, 2010, ENERG POLICY, V38, P1202, DOI 10.1016/j.enpol.2009.11.012

Douglas Mary, 1979, WORLD GOODS ANTHR CO

Kapp G, 2006, RISKS CHANCES COMBIN

Gardner G. T., 2008, ENVIRONMENT

Haas R, 2008, ENERG POLICY, V36, P4012, DOI 10.1016/j.enpol.2008.06.028

Tsighe Z, 2002, ENERG POLICY, V30, P1107

Harden Blaine, 2008, WASHINGTON POST 0625

Hiemstra-van der Horst G, 2008, ENERG POLICY, V36, P3333

Holdren John P, 2000, WORLD ENERGY ASSESSM, P61

Jackson T, 2005, J IND ECOL, V9, P19, DOI 10.1162/1088198054084734

Jacobson A, 2005, ENERG POLICY, V33, P1825, DOI 10.1016/j.enpol.2004.02.017

Jane S, 1991, ENERG POLICY, P24

Jansen J. C, 2009, ENERGY SERVICES SECU, P7

Karekezi S, 2002, ENERG POLICY, V30, P1015, DOI 10.1016/S0301-4215(02)00055-1

LEAD International, 2004, SUST SOC TRANS CAS S

Legros G, 2009, ENERGY ACCESS SITUAT

Lovins A, 1978, ANNU REV ENERG ENV, V3, P466

Lovins Amory, 1976, FUTURE STRATEGIES EN, P88

LOVINS AB, 1976, FOREIGN AFF, V55, P65, DOI 10.2307/20039628

LOVINS AB, 1979, SOFT ENERGY PATHS DU

Lovins AB, 1983, TECHNOLOGY ENERGY CH, P1

Malyshev Teresa, 2009, LOOKING AHEAD ENERGY

Masera OR, 2000, WORLD DEV, V28, P2083, DOI 10.1016/S0305-750X(00)00076-0

McDade S, 2005, ENERGY SERVICES MILL, P9

Monbiot George, 2009, GUARDIAN SEP  
 MORRISON DE, 1981, ANNU REV ENERGY, V6, P357, DOI 10.1146/annurev.eg.06.110181.002041  
 Pachauri S, 2004, WORLD DEV, V32, P2083, DOI 10.1016/j.worlddev.2004.08.005  
 Rehfuess E, 2006, ENVIRON HEALTH PERSP, V114, P373, DOI 10.1289/ehp.8603  
 Shonali P, 2008, ENERG POLICY, V36, P4022  
 Shove E, 2004, ENERGY ENV, V15, P1053  
 Shove E, 2003, COMFORT CLEANLINESS  
 Sovacool BK, 2011, ENERG POLICY, V39, P1659, DOI 10.1016/j.enpol.2010.12.041  
 SPRENG D, 1993, ENERG POLICY, V21, P13, DOI 10.1016/0301-4215(93)90204-5  
 United Nations Development Programme, 1997, EN MAJ GLOB ISS EN R  
 Unander F, 2005, NAT RESOUR FORUM, V29, P377, DOI 10.1111/j.1477-8947.2005.00148.x  
 World Bank, 2011, WORLD DEVELOPMENT REPORT 2011: CONFLICT, SECURITY AND  
 DEVELOPMENT, P1, DOI 10.1596/978-0-8213-8439-8  
 Zhang QY, 2004, ENERG BUILDINGS, V36, P1217, DOI 10.1016/j.enbuild.2003.08.002  
 NR 40  
 TC 7  
 Z9 7  
 U1 1  
 U2 4  
 PU ELSEVIER SCI LTD  
 PI OXFORD  
 PA THE BOULEVARD, LANGFORD LANE, KIDLINGTON, OXFORD OX5 1GB, OXON, ENGLAND  
 SN 1877-3435  
 J9 CURR OPIN ENV SUST  
 JI Curr. Opin. Environ. Sustain.  
 PD SEP  
 PY 2011  
 VL 3  
 IS 4  
 BP 218  
 EP 224  
 DI 10.1016/j.cosust.2011.06.004  
 PG 7  
 WC GREEN & SUSTAINABLE SCIENCE & TECHNOLOGY; Environmental Sciences  
 SC Science & Technology - Other Topics; Environmental Sciences & Ecology  
 GA 825UP  
 UT WOS:000295307900004  
 DA 2018-05-03  
 ER  
  
 PT S  
 AU Pantong, K  
     Chirarattananon, S  
     Chaiwiwatworakul, P  
 AF Pantong, K.  
     Chirarattananon, S.  
     Chaiwiwatworakul, P.  
 BE Yupapin, PP  
     PivsaArt, S  
     Ohgaki, H  
 TI Development of Energy Conservation Programs for Commercial Buildings  
     based on Assessed Energy Saving Potentials  
 SO 9TH ECO-ENERGY AND MATERIALS SCIENCE AND ENGINEERING SYMPOSIUM  
 SE Energy Procedia  
 LA English  
 DT Proceedings Paper  
 CT 9th Eco-Energy and Materials Science and Engineering Symposium  
 CY MAY 25-27, 2011

CL Chiang Rai, THAILAND

DE Building energy code; Building energy labeling; Energy efficiency;

Energy conservation program

ID THAILAND

AB Thailand is a developing country whose energy demand is continuously increasing. However, Thailand has limited energy resources, and half of the energy consumed is imported. Buildings account for the largest sector, which shares 53% of total electrical energy consumption in Thailand. Over half of this consumption is due to the large commercial buildings. This study aims to propose energy conservation programs focusing on these large commercial buildings. The energy consumption data were extracted from various sources to develop the building performance models, which were then employed to project its energy consumption for the next 20 years (2030). The analysis shows that the energy consumption from the large commercial buildings in 2030 will nearly double the consumption in the base year (2010) if there is no energy conservation program implemented. However, implementation of the proposed programs of building energy code (BEC) and building energy labeling (BEL) integrated with a rolling plan of the program revision show technically a high potential for savings of electrical energy up to 50% from the total consumption in 2030. Implementation of a program for high efficiency stove and burner can help save additional LPG for cooking and fuel oil for water heating 40% from the total fuel demand in 2030. (C) 2011 Published by Elsevier Ltd. Selection and/or peer-review under responsibility of CEO of Sustainable Energy System, Rajamangala University of Technology Thanyaburi (RMUTT).

C1 [Pantong, K.; Chirarattananon, S.; Chaiwiwatworakul, P.] King Mongkuts Univ Technol Thonburi, Joint Grad Sch Energy & Environm, Bangkok, Thailand.

RP Pantong, K (reprint author), King Mongkuts Univ Technol Thonburi, Joint Grad Sch Energy & Environm, Bangkok, Thailand.

EM karun.jgc@gmail.com

CR Chan AT, 2005, ENER BUILDINGS, V37, P631, DOI 10.1016/j.enbuild.2004.09.018

CHIRARATTANANON S, 1994, ENERGY, V19, P269, DOI 10.1016/0360-5442(94)90066-3

Chirarattananon S, 2004, ENER BUILDINGS, V36, P680, DOI 10.1016/j.enbuild.2004.01.035

Chirarattananon S, 2010, ENERGY, V35, P1741, DOI 10.1016/j.energy.2009.12.027

Chirarattananon S, 2003, ENERGY CONVERSION MA, V44, P742

Chirarattananon S., 2004, P SUST EN ENV SEE JO, P859

Department of Alternative Energy Development and Efficiency (DEDE), MIN EN THAIL EN SIT

Electricity Generating Authority of Thailand, 2010, THAIL POW DEV PLAN 2

Joint Graduate School of Energy and Environment, 2009, FIN REP HIGH EN PERF

Office of Natural Resources and Environmental Policy and Planning Ministry of Natural Resources and Environment, 2010, REP ACC TREATM GREEN

U.S.A Public Health Service, AP 42 COMP AIR POLL

NR 11

TC 7

Z9 7

U1 0

U2 5

PU ELSEVIER SCIENCE BV

PI AMSTERDAM

PA SARA BURGERHARTSTRAAT 25, PO BOX 211, 1000 AE AMSTERDAM, NETHERLANDS

SN 1876-6102

J9 ENRGY PROCED

PY 2011

VL 9

DI 10.1016/j.egypro.2011.09.009

PG 14

WC Energy & Fuels; Materials Science, Multidisciplinary

SC Energy & Fuels; Materials Science

GA BYG26

UT WOS:000298549900009

OA gold

DA 2018-05-03

ER

PT J

AU Li, YG

Zhuang, Z

Liu, JP

AF Li Yuguo

Zhuang Zhi

Liu JiaPing

TI Chinese kang and building energy consumption

SO CHINESE SCIENCE BULLETIN

LA English

DT Article

DE Building energy efficiency; rural energy; home heating; Chinese kang;  
elevated kang; indoor air quality

AB Chinese kang are an integrated system for cooking, sleeping and heating in rural Northern China with more than 2000 years history. In 2004 there were 67 million Chinese kang used by 44 million rural families or 174 million people. Chinese kang store surplus heat from stove during cooking and releases it later for both home heating and localized bed heating. Such a widely used heating system has been rarely studied. Understanding kang is important for developing new effective home heating systems for better energy efficiency and improving indoor air quality in Northern China. In this paper, we review and present some preliminary results from our field measurement and mathematical modeling, and discuss the development of Chinese kang as related to future energy consumption in rural homes, and building energy consumption in China in general. We suggest that transition and new technologies for rural home heating in Northern China, i.e. the future of Chinese kang, should be considered as the top priority in managing future building energy consumption in China.

C1 [Li Yuguo; Zhuang Zhi] Univ Hong Kong, Dept Mech Engn, Hong Kong, Hong Kong, Peoples R China.  
[Zhuang Zhi] Dalian Univ Technol, Bldg Environm & New Energy Resource Lab, Dalian 1106024, Peoples R China.

[Liu JiaPing] Xian Architectural Technol Univ, Sch Architecture, Xian 710005, Peoples R China.

RP Li, YG (reprint author), Univ Hong Kong, Dept Mech Engn, Pokfulam Rd, Hong Kong, Hong Kong, Peoples R China.

EM liyg@hku.hk

RI Li, Yuguo/A-9469-2010

OI Li, Yuguo/0000-0002-2281-4529

FU Research Grants Council of the Hong Kong Special Administrative Region, China [HKU 7154/05E]; National Natural Science Foundation of China 2007 Young Researcher Award [50729803]; International Energy Agency Annex 44; Integrating Environmentally Responsive Elements in Buildings

FX Supported by the grant from the Research Grants Council of the Hong Kong Special Administrative Region, China (Grant No. HKU 7154/05E) and National Natural Science Foundation of China 2007 Young Researcher Award (Grant No. 50729803) The work is also a part of the International Energy Agency Annex 44 project on Integrating Environmentally Responsive Elements in Buildings.

CR Bansal NK, 1998, BUILD ENVIRON, V34, P305

Building Energy Research Centre Tsinghua University, 2008, 2008 ANN REP CHIN BU

\*DEST GROUP, 2006, BUILD ENV SYST SIM A

Edwards RD, 2004, ENERG POLICY, V32, P395, DOI 10.1016/S0301-4215(02)00309-9

GRIMM HP, 2002, P 12 EUR C BIOM EN I

GUO JY, 2003, ENERGY SAVING STOVE

Li J., 1998, ASSESSMENT BIOMASS R

Li YG, 2000, BUILD ENVIRON, V35, P191, DOI 10.1016/S0360-1323(99)00011-6

National Bureau of Statistics of China, 2005, CHIN STAT YB 2005

\*NAT MET INF CTR D, 2005, CHIN SPEC CLIM DAT B

NORDQVIST J, 2000, RURAL RESIDENTIAL DI

Sinton J. E., 2004, ENERGY SUSTAIN DEV, V8, P33, DOI DOI 10.1016/S0973-0826(08)60465-2

Wang D. M., 2003, RENEW ENERG, V3, P52

Wang XP, 2003, ENVIRON DEV ECON, V8, P467, DOI 10.1017/S1355770X03000251

YANG XD, 2008, P 1 INT C BUILD EN E

Yeo MS, 2003, ENER G BUILDINGS, V35, P715

ZHUANG Z, 2008, P 2008 WORLD SUST BU

Zhuang Z., 2008, P 1 INT C BUILD EN E

ZHUANG Z, 2007, P 10 INT BUILD PERF

Zhuang Z, 2009, ENER G BUILDINGS, V41, P111, DOI 10.1016/j.enbuild.2008.07.013

NR 20

TC 7

Z9 12

U1 0

U2 14

PU SCIENCE PRESS

PI BEIJING

PA 16 DONGHUANGCHENGGEN NORTH ST, BEIJING 100717, PEOPLES R CHINA

SN 1001-6538

J9 CHINESE SCI BULL

JI Chin. Sci. Bull.

PD MAR

PY 2009

VL 54

IS 6

BP 992

EP 1002

DI 10.1007/s11434-009-0129-z

PG 11

WC Multidisciplinary Sciences

SC Science & Technology - Other Topics

GA 418UM

UT WOS:000264174900012

DA 2018-05-03

ER

PT J

AU Rackes, A

Waring, MS

AF Rackes, Adams

Waring, Michael S.

TI Alternative ventilation strategies in US offices: Comprehensive assessment and sensitivity analysis of energy saving potential

SO BUILDING AND ENVIRONMENT

LA English

DT Article

DE Energy efficiency measures; Building energy simulation; Economizer; Demand controlled ventilation; Supply air temperature reset; Heating, ventilation, and air-conditioning; (HVAC)

ID INDOOR AIR-QUALITY; DEMAND-CONTROLLED VENTILATION; BUILDING PERFORMANCE; COMMERCIAL BUILDINGS; SEQUENCE GENERATOR; SIMULATION; MODELS; SYSTEM

AB Mature technologies exist to reduce the heating, ventilation, and air-conditioning (HVAC) energy associated with ventilation and use ventilation proactively to save energy. This study investigated the energy use impacts in U.S. office buildings of multiple alternative ventilation strategies that combined: economizing, demand controlled ventilation (DCV), supply air temperature reset (SR), and/or a doubled ventilation rate. We used energy simulations in a Monte Carlo analysis, sampling 17 building inputs and varying locations to match the climate zone distribution of the U.S. office stock. Results indicated the possibility for significant savings compared to a baseline that ventilated constantly at a minimum rate in both a small office type with a constant air volume (CAV) HVAC system and a medium office type with a variable air volume (VAV) system. In 95% of instances, HVAC source energy savings were 5-25% in the small-CAV office (median: 11%) and 6-42% in the medium-VAV office (median: 27%). In the small-CAV office, DCV typically saved the most energy, usually from heating, and heating degree days and occupant density were decisive influences. In the medium-VAV office, economizing and SR were most important,

DCV usually only had minor impacts, and zone temperature setpoints, along with climate indicators, were the critical influences. Other than infiltration, envelope characteristics did not strongly influence energy impacts. The untapped primary energy savings of alternative ventilation strategies over the 74% of U.S. office floorspace reasonably represented by our modeling was estimated at 36 TWh per year, with an annual value of U.S. \$1.25 billion. (C) 2017 Elsevier Ltd.

C1 [Rackes, Adams; Waring, Michael S.] Drexel Univ, Dept Civil Architectural & Environm Engrn, 3141 Chestnut St, Philadelphia, PA 19104 USA.

RP Rackes, A (reprint author), Drexel Univ, Dept Civil Architectural & Environm Engrn, 3141 Chestnut St, Philadelphia, PA 19104 USA.

EM aer37@drexel.edu

FU U.S. National Science Foundation [1511151]; U.S. NSF Graduate Research Fellowship [1002809]

FX This work was supported by the U.S. National Science Foundation under Grant No. 1511151 and the U.S. NSF Graduate Research Fellowship under Grant No. 1002809.

CR ASHRAE, 2011, STAND METH TEST EV B

ASHRAE, 2013, VENT ACC IND AIR QUA

American Society of Heating and Refrigerating Engineers (ASHRAE), 2001, VENT ACC IND AIR QUA

ASHRAE, 2013, ASHRAE HDB FUND

Baechler M. C., 2010, GUIDE DETERMINING CL, V7

Ben-David T, 2016, BUILD ENVIRON, V104, P320, DOI 10.1016/j.buildenv.2016.05.007

Brandemuehl MJ, 1999, ASHRAE T, V105, P39

BRATLEY P, 1988, ACM T MATH SOFTWARE, V14, P88, DOI 10.1145/42288.214372

Burhenne S., 2011, P BUILD SIMUL

Burhenne S, 2013, BUILD ENVIRON, V62, P143, DOI 10.1016/j.buildenv.2013.01.013

California Energy Commission, 2003, ADV VAR AIR VOL SYST

Rodriguez GC, 2013, ENERG BUILDINGS, V67, P79, DOI 10.1016/j.enbuild.2013.08.009

Chan W. R., 2006, ASSESSING EFFECTIVEN

Chao CYH, 2004, BUILD ENVIRON, V39, P385, DOI 10.1016/j.buildenv.2003.11.001

Deru M., 2011, US DEP ENERGY COMMER

Eisenhower B, 2012, ENERG BUILDINGS, V47, P292, DOI 10.1016/j.enbuild.2011.12.001

Fisk WJ, 2012, BUILD ENVIRON, V47, P368, DOI 10.1016/j.buildenv.2011.07.001

Fisk WJ, 2005, ASHRAE TRAN, V111, P673

Hamilton M, 2016, INDOOR AIR, V26, P318, DOI 10.1111/ina.12192

Hart R., 2011, ASHRAE T, P117

Homma T, 1996, RELIAB ENG SYST SAFE, V52, P1, DOI 10.1016/0951-8320(96)00002-6

Hopfe CJ, 2011, ENERG BUILDINGS, V43, P2798, DOI 10.1016/j.enbuild.2011.06.034

Jarnagin R.E., 2010, 9012010 ANSIASHRAEIE

Joe S, 2003, ACM T MATH SOFTWARE, V29, P49, DOI 10.1145/641876.641879

Johnson AM, 2017, INDOOR AIR, V27, P230, DOI 10.1111/ina.12299

Kreider JF, 2009, HEATING COOLING BUIL

Lattin J. M., 2002, ANAL MULTIVARIATE DA

Lawrence TM, 2007, ASHRAE TRAN, V113, P227

The MathWorks Inc, CONSTR SOB QUAS RAND

Nassif N, 2012, ENERG BUILDINGS, V45, P72, DOI 10.1016/j.enbuild.2011.10.018

Ng LC, 2012, BUILD ENVIRON, V58, P179, DOI 10.1016/j.buildenv.2012.07.008

Rackes A, 2016, INDOOR AIR, V26, P642, DOI 10.1111/ina.12224

Rackes A, 2016, APPL ENERG, V174, P256, DOI 10.1016/j.apenergy.2016.04.081

Rackes A, 2014, ENERG BUILDINGS, V75, P272, DOI 10.1016/j.enbuild.2014.02.024

Rackes A, 2013, BUILD ENVIRON, V60, P243, DOI 10.1016/j.buildenv.2012.10.013

Saltelli A., 2008, GLOBAL SENSITIVITY A

Sanchez DG, 2014, ENERG BUILDINGS, V68, P741, DOI 10.1016/j.enbuild.2012.08.048

Seppanen O, 2006, INDOOR AIR, V16, P28, DOI 10.1111/j.1600-0668.2005.00394.x

Sundell J, 2011, INDOOR AIR, V21, P191, DOI 10.1111/j.1600-0668.2010.00703.x

Tian W, 2013, RENEW SUST ENERG REV, V20, P411, DOI 10.1016/j.rser.2012.12.014

[EnergyPlus U. S. DOE], 2015, ENERGYPLUS

U.S. Department of Energy, 2012, 2011 BUILD EN DAT BO

U.S. Energy Information Administration (EIA), NAT GAS CONS END US



U.S. Energy Information Administration (EIA), 2006, COMM BUILD EN CONS S  
 U.S. Energy Information Administration (EIA), NAT GAS PRIC AV COMM  
 U.S. Energy Information Administration (EIA), RET SAL EL ULT CUST  
 [Anonymous], AV RET PRIC EL ULT C  
 U.S. EIA, 2015, COMM BUILD EN CONS S  
 U.S. EPA (U.S. Environmental Protection Agency), 2013, ENERGYSTAR PORTF MAN  
 U.S. EPA, BUILD ASS SURV EV ST  
 Wang G, 2012, ENER G BUILDINGS, V49, P310, DOI 10.1016/j.enbuild.2012.02.024  
 Fisk William J., 1998, ENER G BUILDINGS, V29, P35  
 Womble S.E., 1995, HLTH BUILDINGS, V95, P1305  
 Yao Y, 2010, ENER G BUILDINGS, V42, P1220, DOI 10.1016/j.enbuild.2010.02.013  
 NR 54  
 TC 6  
 Z9 6  
 U1 8  
 U2 22  
 PU PERGAMON-ELSEVIER SCIENCE LTD  
 PI OXFORD  
 PA THE BOULEVARD, LANGFORD LANE, KIDLINGTON, OXFORD OX5 1GB, ENGLAND  
 SN 0360-1323  
 EI 1873-684X  
 J9 BUILD ENVIRON  
 JI Build. Environ.  
 PD MAY  
 PY 2017  
 VL 116  
 BP 30  
 EP 44  
 DI 10.1016/j.buildenv.2017.01.027  
 PG 15  
 WC Construction & Building Technology; Engineering, Environmental;  
 Engineering, Civil  
 SC Construction & Building Technology; Engineering  
 GA EP7IT  
 UT WOS:000397552200003  
 DA 2018-05-03  
 ER  
  
 PT J  
 AU Hargreaves, A  
 Cheng, V  
 Deshmukh, S  
 Leach, M  
 Steemers, K  
 AF Hargreaves, Anthony  
 Cheng, Vicky  
 Deshmukh, Sandip  
 Leach, Matthew  
 Steemers, Koen  
 TI Forecasting how residential urban form affects the regional carbon  
 savings and costs of retrofitting and decentralized energy supply  
 SO APPLIED ENERGY  
 LA English  
 DT Article; Proceedings Paper  
 CT 3rd International Conference on Sustainable Thermal Energy Management  
 (SusTEM)  
 CY JUL 07-08, 2015  
 CL Newcastle upon Tyne, ENGLAND

DE Building-scale; Sustainable technologies; Housing typologies; Urban modelling; Decarbonisation of supply

ID LAND-USE; SYSTEM MODELS; HOUSING STOCK; CONSUMPTION; UK; SUSTAINABILITY; TECHNOLOGY; SCENARIOS; TRANSPORT; PARADIGM

AB Low carbon energy supply technologies are increasingly used at the building and community scale and are an important part of the government decarbonisation strategy. However, with their present state of development and costs, many of these decentralised technologies rely on public subsidies to be financially viable. It is questionable whether they are cost effective compared to other ways of reducing carbon emissions, such as decarbonisation of conventional supply and improving the energy efficiency of dwellings. Previous studies have found it difficult to reliably estimate the future potential of decentralised supply because this depends on the available residential space which varies greatly within a city region. To address this problem, we used an integrated modelling framework that converted the residential density forecasts of a regional model into a representation of the building dimensions and land of the future housing stock. This included a method of estimating the variability of the dwellings and residential land. We present the findings of a case study of the wider south east regions of England that forecasted the impacts of energy efficiency and decentralised supply scenarios to year 2031. Our novel and innovative method substantially improves the spatial estimates of energy consumption compared to building energy models that only use standard dwelling typologies. We tested the impact of an alternative spatial planning policy on the future potential of decentralised energy supply and showed how lower density development would be more suitable for ground source heat pumps. Our findings are important because this method would help to improve the evidence base for strategies on achieving carbon budgets by taking into account how future residential space constraints would affect the suitability and uptakes of these technologies. (C) 2016 The Authors. Published by Elsevier Ltd.

C1 [Hargreaves, Anthony] Univ Birmingham, Sch Engn, Birmingham, W Midlands, England.

[Cheng, Vicky] Tech Univ Munich, Munich Sch Engn, Munich, Germany.

[Deshmukh, Sandip] Birla Inst Technol & Sci, Pilani Hyderabad Campus, Pilani, Rajasthan, India.

[Leach, Matthew] Univ Surrey, Ctr Environm Strategy, Guildford, Surrey, England.

[Steemers, Koen] Univ Cambridge, Dept Architecture, Cambridge, England.

RP Hargreaves, A (reprint author), Univ Birmingham, Sch Engn, Birmingham, W Midlands, England.

EM a.j.hargreaves@bham.ac.uk

CR Abraham JE, 2005, TRANSPORT RES REC, P114

Arup, 2008, ASHF FUT ASHF SUST E

Balcombe P, 2014, APPL ENERG, V130, P403, DOI 10.1016/j.apenergy.2014.05.047

Barton J, 2015, DISTRIBUTING POWER T

Bianchi M, 2012, APPL ENERG, V97, P673, DOI 10.1016/j.apenergy.2011.11.023

Blum P, 2010, RENEW ENERG, V35, P122, DOI 10.1016/j.renene.2009.03.034

Chappells H, 2005, BUILD RES INF, V33, P32, DOI 10.1080/0961321042000322762

Cheng V, 2011, ENVIRON MODELL SOFTW, V26, P1186, DOI 10.1016/j.envsoft.2011.04.005

Committee on Climate Change, 2009, M CARB BUDG NEED STE

Committee on Climate Change, 2013, 2013 4 CARB BUDG R 2

De Barra TI, 1982, ENV PLANN B, V9, P429

Department for Communities and Local Government, 2012, NAT PLANN POL FRAM

Department for Communities and Local Government, 2010, COD SUST HOM TECHN G

Department of Communities and Local Government, 2014, NEXT STEPS ZER CARB

Department of Communities and Local Government, 2011, COST BUILD COD SUST

Department for Communities and Local Government, 2009, ENGL HOUS COND SURV

Department for Communities and Local Government, 2007, GEN LAND US DAT STAT

Department of Energy and Climate Change, 2013, VAL EN US GREENH GAS

Department of Energy & Climate Change, 2013, FUT HEAT M CHALL

Department of Energy and Climate Change, 2012, REN HEAT INC

Department of Energy and Climate Change, 2013, FUT HEAT M CHALL EV

Department of Energy & Climate Change, 2013, DEP EN CLIM CHANG PU, V13D

Department for Transport, 2009, TRIP END MOD PRES PR

Department for Transport, 2014, NAT TRAV SURV ENGL 2

Dodds PE, 2014, APPL ENERG, V132, P358, DOI 10.1016/j.apenergy.2014.06.079

Echenique MH, 2013, ENVIRON PLANN B, V40, P1003, DOI 10.1068/b38202

Filogamo L, 2014, APPL ENERG, V135, P825, DOI 10.1016/j.apenergy.2014.04.002

Fonseca JA, 2015, APPL ENERG, V142, P247, DOI 10.1016/j.apenergy.2014.12.068

Hargreaves AJ, 2015, COMPUT ENVIRON URBAN, V54, P280, DOI 10.1016/j.compenvurbsys.2015.08.001  
HM Treasury, 2011, GREEN BOOK APPR EV C  
Jenkins DP, 2009, ENERGBUILDINGS, V41, P587, DOI 10.1016/j.enbuild.2008.12.002  
Jenkins G., 2010, UK CLIMATE PROJECTIO  
Jones P, 2013, BUILD RES INF, V41, P532, DOI 10.1080/09613218.2013.807064  
Kannan R, 2009, APPL ENERGB, V86, P416, DOI 10.1016/j.apenergy.2008.08.005  
Keirstead J, 2012, RENEW SUST ENERGB REV, V16, P3847, DOI 10.1016/j.rser.2012.02.047  
Keirstead J, 2012, ENERGB POLICY, V46, P253, DOI 10.1016/j.enpol.2012.03.058  
Lukac N, 2013, APPL ENERGB, V102, P803, DOI 10.1016/j.apenergy.2012.08.042  
Mott MacDonald Consultancy, 2010, UK EL GEN COSTS UPD  
Mitchell G, 2011, ENVIRON PLANN A, V43, P2143, DOI 10.1068/a43570  
NERA Economic Consulting and AEA, 2010, REP COMM CLIM CHANG  
Office for National Statistics, 2001, NAT STAT 2001 AR CLA  
Pereira IM, 2013, ENERGB POLICY, V59, P257, DOI 10.1016/j.enpol.2013.03.024  
Pilkington B, 2011, ENERGB POLICY, V39, P4962, DOI 10.1016/j.enpol.2011.06.018  
Poyry, 2009, POT COSTS DISTR HEAT  
Robinson D, 2007, SOL ENERGB, V81, P1196, DOI 10.1016/j.solener.2007.06.002  
Shimoda Y, 2010, APPL ENERGB, V87, P1944, DOI 10.1016/j.apenergy.2009.10.021  
Shorrocks LD, 1997, ENERGB POLICY, V25, P1027, DOI 10.1016/S0301-4215(97)00130-4  
Urich C, 2014, WATER SCI TECHNOL, V70, P1857, DOI 10.2166/wst.2014.363  
Waddell P, 2003, NETW SPAT ECON, V3, P43, DOI 10.1023/A:1022049000877  
Yu Z, 2011, ENERGB BUILDINGS, V43, P1409, DOI 10.1016/j.enbuild.2011.02.002

NR 51

TC 6

Z9 6

U1 5

U2 38

PU ELSEVIER SCI LTD

PI OXFORD

PA THE BOULEVARD, LANGFORD LANE, KIDLINGTON, OXFORD OX5 1GB, OXON, ENGLAND

SN 0306-2619

EI 1872-9118

J9 APPL ENERGB

J1 Appl. Energy

PD JAN 15

PY 2017

VL 186

SI SI

BP 549

EP 561

DI 10.1016/j.apenergy.2016.02.095

PN 3

PG 13

WC Energy & Fuels; Engineering, Chemical

SC Energy & Fuels; Engineering

GA EF7FK

UT WOS:000390495300025

OA gold

DA 2018-05-03

ER

PT J

AU Barnes, E

Parrish, K

AF Barnes, Elizabeth

Parrish, Kristen

TI Small buildings, big impacts: The role of small commercial building  
energy efficiency case studies in 2030 Districts

SO SUSTAINABLE CITIES AND SOCIETY

LA English

DT Article

DE Small commercial buildings; Building energy efficiency; Case study

AB Small commercial buildings, or those comprising less than 50,000 square feet of floor area, make up 90% of the total number of buildings in the United States. Though these buildings currently account for less than 50% of total energy consumption in the U.S., this statistic is expected to change as larger commercial buildings become more efficient and thus account for a smaller percentage of commercial building energy consumption. This paper describes the efforts of a multi-organization collaboration and their demonstration partners in developing a library of case studies that promote and facilitate energy efficiency in the small commercial buildings market as well as a case study template that standardized the library. Case studies address five identified barriers to energy efficiency in the small commercial market, specifically, lack of: (1) access to centralized, comprehensive, and consistent information about how to achieve energy targets, (2) reasonably achievable energy targets, (3) access to tools that measure buildings' progress toward targets, (4) financial incentives that make the reduction effort attractive, and (5) effective models of how disparate stakeholders can collaborate in commercial centers to reach targets. The case study library can be organized by location, building type, project size, energy savings, end uses impacted, and retrofit measures. This paper discusses the process of developing the library and case study template. Finally, the paper presents next steps for the library and explores energy savings potential its widespread use. (C) 2016 Elsevier Ltd. All rights reserved.

C1 [Barnes, Elizabeth; Parrish, Kristen] Arizona State Univ, Sch Sustainable Engn & Built Environm, POB 873005, Tempe, AZ 85287 USA.

RP Parrish, K (reprint author), Arizona State Univ, Sch Sustainable Engn & Built Environm, POB 873005, Tempe, AZ 85287 USA.

EM Kristen.Parrish@asu.edu

FU U.S. Department of Energy [FOA 0000829]

FX This work was funded by an award from the U.S. Department of Energy's FOA 0000829, "Better Buildings - Commercial Energy Efficiency Solutions," specifically, the "Small Commercial 2030 District Program and Toolkit" project led by the Lawrence Berkeley National Laboratory. Any opinions, findings, conclusions, or recommendations expressed in this paper are those of the writers and do not necessarily reflect the views of the Lawrence Berkeley National Laboratory or the United States Department of Energy.

CR 2030 Districts, 2015, AB 2030 DISTR

2030 Districts, 2016, 2030 DISTR NETW

Architecture 2030, 2016, WHY BUILD SECT

Architecture 2030, 2016, US

National Trust for Historic Preservation, 2013, REALIZING ENERGY EFF

Langner R., 2013, IND RES RECOMMENDATI

New Buildings institute (NBI), 2016, CAS STUD

RMI, 2016, CAS STUD

U.S. Department of Energy, 2013, BUILD EN DAT BOOK

U.S. Department of Energy, 2016, COMM BUILD RES DAT

US Department of Energy, 2008, EN EFF TRENDS RES CO

US DOE, 2011, ADV EN RETR GUID OFF

US EPA, 2016, ENERGY STAT CERT YOU

NR 13

TC 6

Z9 6

U1 1

U2 11

PU ELSEVIER SCIENCE BV

PI AMSTERDAM

PA PO BOX 211, 1000 AE AMSTERDAM, NETHERLANDS

SN 2210-6707

EI 2210-6715

J9 SUSTAIN CITIES SOC

JI Sust. Cities Soc.  
PD NOV  
PY 2016  
VL 27  
BP 210  
EP 221  
DI 10.1016/j.scs.2016.05.015  
PG 12  
WC Construction & Building Technology; GREEN & SUSTAINABLE SCIENCE &  
TECHNOLOGY; Energy & Fuels  
SC Construction & Building Technology; Science & Technology - Other Topics;  
Energy & Fuels  
GA EE1DQ  
UT WOS:000389321500024  
DA 2018-05-03  
ER

PT J  
AU Batic, M  
Tomasevic, N  
Beccuti, G  
Demiray, T  
Vranes, S  
AF Batic, Marko  
Tomasevic, Nikola  
Beccuti, Giovanni  
Demiray, Turhan  
Vranes, Sanja  
TI Combined energy hub optimisation and demand side management for  
buildings  
SO ENERGY AND BUILDINGS  
LA English  
DT Article  
DE Energy hub modelling; Demand side management; Optimisation; Linear  
programming

ID SUPPLY-SYSTEMS; OPTIMAL-DESIGN; GENETIC ALGORITHM; DECISION-SUPPORT;  
LOAD MANAGEMENT; NETWORK; ELECTRICITY; OPERATION; STORAGE; UTILITY

AB The deployment of innovative energy management (EM) approaches based on systematic modelling and optimisation techniques has received an increasing amount of attention in the last decade. This has been often prompted by more stringent energy policy objectives aiming at reducing carbon emissions, phasing out nuclear plants and promoting overall energy efficiency, while containing both capital and operating costs. In this respect the energy hub concept has proven to be a popular approach for operating technologies and units comprising diversified energy carriers, small-scale production units, storage devices and converter systems. Additionally, developments in communication network and control infrastructure afford the possibility, at least in principle, to actively steer and adjust the load on the demand side of the energy balance, leading to the formulation of demand side management (DSM) techniques. This paper proposes an EM solution that combines the features and advantages of both of the aforementioned approaches, i.e. the energy hub framework and DSM methods. The key idea is to combine the supply-side characteristics of energy hubs with the demand side flexibility yielded by the deployment of DSM schemes. This combined approach is validated on an existing building complex by formalizing its energy supply system as an integrated hub and by modelling its heating demand based on thermodynamic principles. Numerical results based on this experimental setup are presented, illustrating that the combined approach can lead to overall savings typically exceeding 10% compared to a baseline scenario where no EM solution is applied, i.e. where only a rule-based heuristic is employed to control the available energy assets, and underscoring the advantages brought by a systematically integrated modelling and optimisation approach. The proposed solution is thus of interest for a broad host of installations in the residential and commercial domain, and for the latter a specific real-world example has been explicitly

considered and analysed. The obtained results are encouraging and warrant further analysis and investigation. (C) 2016 Elsevier B.V. All rights reserved.

C1 [Batic, Marko; Tomasevic, Nikola; Vranes, Sanja] Univ Belgrade, Sch Elect Engrn, Mihajlo Pupin Inst, Volgina 15, Belgrade 11060, Serbia.

[Beccuti, Giovanni; Demiray, Turhan] ETH, Forschungsstelle Energienetze, Zurich, Switzerland.

RP Batic, M (reprint author), Univ Belgrade, Sch Elect Engrn, Mihajlo Pupin Inst, Volgina 15, Belgrade 11060, Serbia.

EM marko.batic@pupin.rs

FU European Union (FP7 EPIC-HUB project) [600067]; Ministry of Education, Science and Technological Development of Republic of Serbia [TR-32010]

FX The research presented in this paper is financed by the European Union (FP7 EPIC-HUB project, Pr. No: 600067), and by the Ministry of Education, Science and Technological Development of Republic of Serbia (Pr. No: TR-32010).

CR Ahcin P., 2010, P IEEE INT C POW SYS

Almassalkhi M., 2011, P POW SYST COMP C ST

Baharlouei Z, 2013, IEEE T SMART GRID, V4, P968, DOI 10.1109/TSG.2012.2228241

Bakken B.H., 2004, IEEE POW ENG SOC GEN, V2

Bakken BH, 2007, ENERGY, V32, P1676, DOI 10.1016/j.energy.2007.01.003

Beccuti G., 2015, P POW C EINDH JUN

Brahman F, 2015, ENERGBUILDINGS, V90, P65, DOI 10.1016/j.enbuild.2014.12.039

Cardenas J.J., 2009, 14 IEEE INT C EM TEC

Favre-Perrod M., 2005, IEEE PES IN C EXP AF

GROSCURTH HM, 1995, ENERGY, V20, P941, DOI 10.1016/0360-5442(95)00067-Q

Hawkes AD, 2009, APPL ENERGB, V86, P1253, DOI 10.1016/j.apenergy.2008.09.006

Henning D, 1998, INT J ENERGB RES, V22, P691, DOI 10.1002/(SICI)1099-114X(19980625)22:8<691::AID-ER395>3.0.CO;2-E

Henning D, 1997, ENERGY, V22, P1135, DOI 10.1016/S0360-5442(97)00052-2

Henning D, 2006, EUR J OPER RES, V175, P1224, DOI 10.1016/j.ejor.2005.06.026

ISO, 2005, 7730 ISO

Kavvadias KC, 2010, ENERGB CONVERS MANAGE, V51, P833, DOI 10.1016/j.enconman.2009.11.019

Keshtkar A, 2015, ENERGB BUILDINGS, V104, P165, DOI 10.1016/j.enbuild.2015.06.068

Khodr HM, 2012, RENEW ENERGB, V48, P269, DOI 10.1016/j.renene.2012.05.008

Khoury J., 2016, ENERGY BUILD, P110

Kienzle F, 2011, IEEE T SUSTAIN ENERGB, V2, P194, DOI 10.1109/TSTE.2011.2106228

Kouveletsou M, 2012, ENERGB BUILDINGS, V54, P96, DOI 10.1016/j.enbuild.2012.07.031

Kung CH, 2000, IEEE IMTC P, P1061, DOI 10.1109/IMTC.2000.848903

Lin QG, 2010, EXPERT SYST APPL, V37, P5040, DOI 10.1016/j.eswa.2009.12.007

Liu P, 2010, ENERGB POLICY, V38, P4224, DOI 10.1016/j.enpol.2010.03.051

Manfren M, 2012, ENERGB PROCED, V14, P1380, DOI 10.1016/j.egypro.2011.12.1105

Mehlerli ED, 2013, RENEW ENERGB, V51, P331, DOI 10.1016/j.renene.2012.09.009

Mehlerli ED, 2012, ENERGY, V44, P96, DOI 10.1016/j.energy.2012.02.009

Mesaric P, 2015, ENERGB BUILDINGS, V108, P1, DOI 10.1016/j.enbuild.2015.09.001

Mohsenian-Rad A.-H., IEEE T SMART GRID, V1

Morais H, 2010, RENEW ENERGB, V35, P151, DOI 10.1016/j.renene.2009.02.031

Norstebo V.S., 2013, EPIC HUB DELIVERABLE

Ortiga J, 2013, APPL THERM ENGB, V50, P1536, DOI 10.1016/j.applthermaleng.2011.10.041

Pandzic H, 2013, APPL ENERGB, V101, P134, DOI 10.1016/j.apenergy.2012.05.039

Platt G., 2008, IEEE EN 2030 C ENERGB, P1

Remme U, 2002, OPERAT RES PROCEED, P59

Ren HB, 2010, APPL ENERGB, V87, P1001, DOI 10.1016/j.apenergy.2009.09.023

Schutz T, 2015, ENERGB BUILDINGS, V93, P23, DOI 10.1016/j.enbuild.2015.02.031

Sheikhi A, 2015, IEEE T SMART GRID, V6, P675, DOI 10.1109/TSG.2014.2377020

Stamatovic R., 1831, 32 CIGRE SERB COUNS

Vetterli J, 2012, ENERGB BUILDINGS, V49, P226, DOI 10.1016/j.enbuild.2012.02.012

Yao L, 2005, IEEE T POWER SYST, V20, P1414, DOI 10.1109/TPWRS.2005.852151

Yokoyama R, 2002, ENERGB CONVERS MANAGE, V43, P771, DOI 10.1016/S0196-8904(01)00075-9

TC 6  
 Z9 6  
 U1 2  
 U2 16  
 PU ELSEVIER SCIENCE SA  
 PI LAUSANNE  
 PA PO BOX 564, 1001 LAUSANNE, SWITZERLAND  
 SN 0378-7788  
 EI 1872-6178  
 J9 ENERGBUILDINGS  
 JI Energy Build.  
 PD SEP 1  
 PY 2016  
 VL 127  
 BP 229  
 EP 241  
 DI 10.1016/j.enbuild.2016.05.087  
 PG 13  
 WC Construction & Building Technology; Energy & Fuels; Engineering, Civil  
 SC Construction & Building Technology; Energy & Fuels; Engineering  
 GA DT5NH  
 UT WOS:000381529400020  
 DA 2018-05-03  
 ER

PT J

AU Guo, F

Kurdgelashvili, L

Bengtsson, M

Akenji, L

AF Guo, Fei

Kurdgelashvili, Lado

Bengtsson, Magnus

Akenji, Lewis

TI Analysis of achievable residential energy-saving potential and its implications for effective policy interventions: A study of Xiamen city in southern China

SO RENEWABLE & SUSTAINABLE ENERGY REVIEWS

LA English

DT Review

DE Energy-saving potential; Energy consumption projection; Policy evaluation; Residential buildings; China

ID APARTMENT BUILDINGS; CONSERVATION; EFFICIENCY; COST

AB This paper explores opportunities for effective policy intervention for residential energy savings in southern China, by analyzing achievable potential of residential energy savings in the city of Xiamen as a case study. In contrast to static technical and economic potential analyses, the achievable potential analysis is based on dynamic energy consumption projections, which consider two real-world factors: (1) gradual ramping-up adoption process of advanced technical measures; and (2) consumers' adoption of these measures. A bottom-up type Residential Energy Consumption (REC) projection model specifically tailored for southern China was developed in this paper, based on the general logic and calculation principles utilized in the U.S. EIA's "National Energy Modeling System (NEMS)," and the adoption theory of advanced technical measures proposed by Kastovich. This REC projection model was then used as a policy analysis tool to quantitatively evaluate the impact of various policies on residential energy savings in the case study city of Xiamen. The analysis of the Xiamen case shows that although there is a significant technical potential for residential energy savings in the city (about 20.9-24.9%), the maximum achievable potential (MAP) in 2020 is only about 8.3-8.4% of that year's business-as-usual baseline consumption. Moreover, with existing policies only about one-fourth to half of the calculated MAP is likely to be achieved by 2020. These findings indicate that in order to realize a larger share of achievable potential for

- residential energy savings in China, additional and more effective policies are needed. (C) 2016 Elsevier Ltd. All rights reserved.
- C1 [Guo, Fei; Kurdgelashvili, Lado] Univ Delaware, Ctr Energy & Environm Policy, Newark, DE 19711 USA.  
[Bengtsson, Magnus; Akenji, Lewis] Inst Global Environm Strategies, Hayama, Kanagawa 2400115, Japan.
- RP Guo, F (reprint author), Univ Delaware, Ctr Energy & Environm Policy, Newark, DE 19711 USA.  
EM guofei@udel.edu  
OI Guo, Fei/0000-0001-6415-8083
- FU Institute for Global Environmental Strategies (IGES), Japan, through its  
Asian Development Bank (ADB) [RETA 7450]
- FX The Household Energy Use Survey in Xiamen in this research is sponsored  
by the Institute for Global Environmental Strategies (IGES), Japan,  
through its Asian Development Bank (ADB) funded project RETA 7450.
- CR BASS FM, 1969, MANAGE SCI, V15, P215, DOI 10.1287/mnsc.15.5.215  
Beck RW. Inc, 2009, DISTR REN EN OP IMP  
Cai LH, 2006, RES ENERGY SAVING TE  
China Electricity Council, 2012, IND STAT  
China Household Electrical Appliances Associate, 2011, DEV PLAN CHIN HOUS A  
China Household Electrical Appliances Associate, 2014, NEWS NAT STAND EN EF  
Chung MH, 2014, ENERG BUILDINGS, V78, P176, DOI 10.1016/j.enbuild.2014.04.018  
CLASP, 2013, MARK AN CHIN EN EFF  
CLASP, 2005, POL AN MOD SYST PAMS  
Drury E, 2010, MOD US ROOFT PHOT MA  
Energy Information Administration (EIA), 2009, RES EN CONS SURV HOU  
EIA, 2009, NAT EN MOD SYST OV  
Eldridge M, 2008, ENERGY EFFICIENCY 1  
Energy Label (of China), 2014, NAT STAND EN EFF APP  
EPA, 2014, EM FACT GREENH GAS I  
Farese P, 2012, TOOL PRIORITIZE ENER  
Government of Fujian Province, 2011, NOT SELL PRIC NAT GA  
Guo F, 2015, THESIS  
Hong L, 2013, ENERG POLICY, V54, P335, DOI 10.1016/j.enpol.2012.11.045  
IEA, 2009, EN BAL NON OECD COUN  
International Energy Agency (IEA), 2014, EN BAL NON IECD COUN  
IEA, 2012, CO2 EM FUEL COMB HIG  
IEA, 2014, EN BAL OECD COUNTR 2  
International Risk Governance Council, 2013, REB EFF IMPL CONS BE  
Just D, 2014, INTRO BEHAV EC  
Kang YB, 2008, INTRO POLICIES ENERG  
Kastovich JC, 1982, ADV ELECT HEAT PUMP  
Kuusk K, 2014, ENERG BUILDINGS, V77, P313, DOI 10.1016/j.enbuild.2014.03.026  
Li W, 2014, J APPL MATH, DOI 10.1155/2014/131432  
Lin BQ, 2015, ENERG BUILDINGS, V86, P608, DOI 10.1016/j.enbuild.2014.10.049  
Zhang CJ, 2009, RESEXPLOR LAB, V28  
Mata E, 2013, ENERG POLICY, V55, P404, DOI 10.1016/j.enpol.2012.12.023  
Ministry of Housing and Urban-Rural Development of China, 2012, JGJ752012 MIN HOUS U  
Nadel S, 2012, REB EFF LARG SMALL  
National Bureau of Statistics of China, 2014, STAT YB CHIN CIT 201  
National Bureau of Statistics of China, 2008, CHIN STAT YB 2008 20  
National Development and Reform Commission of China, 2007, REP REN EN DEV CHIN  
Ouyang JL, 2010, ENERGY, V35, P5269, DOI 10.1016/j.energy.2010.07.038  
Ouyang JL, 2009, ENERG POLICY, V37, P140, DOI 10.1016/j.enpol.2008.07.041  
Paiho S, 2013, ENERG BUILDINGS, V66, P706, DOI 10.1016/j.enbuild.2013.07.084  
Pantong K, 2011, ENRGY PROCED, V9, DOI 10.1016/j.egypro.2011.09.009  
Pfeiffer A, 2005, ENERG BUILDINGS, V37, P1158, DOI 10.1016/j.enbuild.2005.06.018  
Rogers M E, 1995, DIFFUSION INNOVATION  
Standardization Administration of China, 2012, SAF US LIF IN PRESS  
[Standardization Administration of China General Administration of Quality Supervision Inspection and  
Quarantine], 2008, GB 17905-2008, Patent No. 17905200



State Council (of China), 2014, ANN ADJ CAT CIT SCAL  
 SUNING, 2014, PROD INF  
 Swisher JN, 1997, 7 UNEP COLL CTR EN E  
 Tsinghua University Building Energy Research Center, 2013, ANN REP EN EFF CHIN  
 Tu FX, 2010, PERSISTING DEV ROAD  
 U.S. Energy Information Administration (EIA), 2013, RES DEM MOD NAT EN M  
 EPA (U. S. Environmental Protection Agency), 2007, GUID COND EN EFF POT  
 van Dronkelaar C, 2014, ENERGBUILDINGS, V71, P129, DOI 10.1016/j.enbuild.2013.12.004  
 Wang L., 2013, J XIAMEN U TECHNOL, V21  
 Xiamen Bureau of Statistics, 2015, 2015 STAT B EC SOC D  
 Xiamen Bureau of Statistics, 2003, YB XIAM SPEC EC ZON  
 Xiamen Bureau of Statistics, 2011, B XIAM POP 6 NAT CEN  
 Xiamen City Government, 2013, EL PRIC SCHEM XIAM C  
 Xiamen City Government, 2011, PRIC SCHEM NAT GAS X  
 Xiamen Development and Reform Commission, 2014, STRAT THINK XIAM SOC  
 Xiamen News Network, 2012, IMPL MULT EL PRIC XI  
 Xiao H, 2014, ENERGPOLICY, V69, P92, DOI 10.1016/j.enpol.2014.02.021  
 Yashiro T, 2009, STOCK MANAGEMENT SUS  
 Yu PCH, 2007, ENERGY, V32, P83, DOI 10.1016/j.energy.2006.03.019  
 Zhang J., 2010, RES THERMAL EFFICIEN

NR 65

TC 6

Z9 6

U1 2

U2 18

PU PERGAMON-ELSEVIER SCIENCE LTD

PI OXFORD

PA THE BOULEVARD, LANGFORD LANE, KIDLINGTON, OXFORD OX5 1GB, ENGLAND

SN 1364-0321

J9 RENEW SUST ENERGEREV

JI Renew. Sust. Energ. Rev.

PD SEP

PY 2016

VL 62

BP 507

EP 520

DI 10.1016/j.rser.2016.04.070

PG 14

WC GREEN &amp; SUSTAINABLE SCIENCE &amp; TECHNOLOGY; Energy &amp; Fuels

SC Science &amp; Technology - Other Topics; Energy &amp; Fuels

GA DQ5UM

UT WOS:000379270600034

DA 2018-05-03

ER

PT J

AU Jones, RV

Lomas, KJ

AF Jones, Rory V.

Lomas, Kevin J.

TI Determinants of high electrical energy demand in UK homes: Appliance  
ownership and use

SO ENERGY AND BUILDINGS

LA English

DT Article

DE Electricity consumption; Appliance ownership; Appliance use; Domestic  
buildings; Odds ratio

ID HOUSEHOLD ELECTRICITY; CONSUMPTION; CLIMATE; MODELS; TRENDS; USAGE

AB This paper provides an analysis of the appliance ownership and use factors contributing to high electrical energy demand in UK homes. The data were collected during a large-scale, city-wide survey, carried out in Leicester, UK, in 2009-2010. Annual electricity consumption and appliance ownership and use were established for 183 dwellings and an odds ratio analysis used to identify the factors that led to high electricity consumption. Many of the appliance ownership and use factors have not previously been studied for the UK domestic sector. The results of this study should be of key interest to government policy makers and energy supply companies interested in the underlying drivers of the highly positively skewed distribution of UK domestic electricity use. The study identifies those appliances that could be targeted for technical improvements or subjected to campaigns to encourage more energy efficient use in order to reduce electricity consumption among high demand households. This paper builds on earlier work by the current authors which identified the households (socio-demographic and dwelling characteristics) most likely to be high electricity consumers. The current work provides the basis for advice and guidance to those households that would enable them to, over time, reduce their electricity use. (C) 2016 The Authors. Published by Elsevier B.V.

C1 [Jones, Rory V.] Univ Plymouth, Bldg Performance Anal Grp, Sch Architecture Design & Environm, Plymouth PL4 8AA, Devon, England.

[Lomas, Kevin J.] Univ Loughborough, Sch Civil & Bldg, Bldg Energy Res Grp, Loughborough LE11 3TU, Leics, England.

RP Jones, RV (reprint author), Univ Plymouth, Bldg Performance Anal Grp, Sch Architecture Design & Environm, Plymouth PL4 8AA, Devon, England.

EM rory.jones@plymouth.ac.uk; K.J.Lomas@lboro.ac.uk

FU 4M Project: Measurement, Modelling, Mapping and Management: An Evidence-Based Methodology for Understanding and Shrinking the Urban Carbon Footprint; Engineering and Physical Sciences Research Council (EPSRC) under the Sustainable Urban Environments programme [EP/F007604/1]

FX This research was supported by the 4M Project: Measurement, Modelling, Mapping and Management: An Evidence-Based Methodology for Understanding and Shrinking the Urban Carbon Footprint, funded by the Engineering and Physical Sciences Research Council (EPSRC) under the Sustainable Urban Environments programme (grant reference EP/F007604/1).

CR Agresti A., 2007, INTRO CATEGORICAL DA

Baker KJ, 2008, APPL ENERG, V85, P475, DOI 10.1016/j.apenergy.2007.09.004

Bartiaux F, 2005, P ECEEE 2005 SUMM ST, P1313

Bedir M, 2013, ENERG BUILDINGS, V58, P194, DOI 10.1016/j.enbuild.2012.10.016

Boardman B., 2005, 40 HOUSE

BRE (Building Research Establishment), 2008, AN EN US CARB EM HIG

Carlson DR, 2013, ENERG BUILDINGS, V64, P132, DOI 10.1016/j.enbuild.2013.04.005

Carter A, 2012, J POLICY MODEL, V34, P242, DOI 10.1016/j.jpolmod.2011.08.006

Coleman M, 2012, ENERG BUILDINGS, V54, P61, DOI 10.1016/j.enbuild.2012.06.008

CRAMER JC, 1985, ENERGY, V10, P1283, DOI 10.1016/0360-5442(85)90139-2

[Anonymous], 2012, DECC PUBL

EST (Energy Saving Trust), 2006, RIS MACH RFEN US PRO

EST. (Energy Saving Trust), 2006, EL LIV ROOM OUR APPL, P1

Field A., 2005, DISCOVERING STAT USI

Firth S, 2008, ENERG BUILDINGS, V40, P926, DOI 10.1016/j.enbuild.2007.07.005

Firth SK, 2010, BUILD RES INF, V38, P25, DOI 10.1080/09613210903236706

Genjo K, 2005, ENERG BUILDINGS, V37, P259, DOI 10.1016/j.enbuild.2004.06.025

Gram-Hanssen K., 2004, P AM COUNC EN EFF E, P774

Halvorsen B, 2001, ENERG POLICY, V29, P227, DOI 10.1016/S0301-4215(00)00106-3

Hamilton IG, 2013, ENERG POLICY, V60, P462, DOI 10.1016/j.enpol.2013.04.004

HERRING H, 1995, ENERGY, V20, P705, DOI 10.1016/0360-5442(95)00021-8

IEA. (International Energy Agency), 2009, IEA PUB L

Jones RV, 2015, ENERG BUILDINGS, V101, P24, DOI 10.1016/j.enbuild.2015.04.052

Jones RV, 2015, RENEW SUST ENERG REV, V43, P901, DOI 10.1016/j.rser.2014.11.084

Kavousian A, 2013, ENERGY, V55, P184, DOI 10.1016/j.energy.2013.03.086

Larsen BM, 2004, ENERG ECON, V26, P179, DOI 10.1016/j.eneco.2004.02.001

Leahy E, 2010, ENERG POLICY, V38, P4265, DOI 10.1016/j.enpol.2010.03.056

Lomas K.J., 2010, LOW CARBON CITIES, P168  
Louw K, 2008, ENER POLICY, V36, P2812, DOI 10.1016/j.enpol.2008.02.032  
Mansouri I, 1996, APPL ENER, V54, P211, DOI 10.1016/0306-2619(96)00001-3  
Marjanovic L., 2008, ASHRAE T 1, V114  
McLoughlin F, 2012, ENER BUILDINGS, V48, P240, DOI 10.1016/j.enbuild.2012.01.037  
NIELSEN L, 1993, ENER POLICY, V21, P1133, DOI 10.1016/0301-4215(93)90263-F  
Parker DS, 2003, ENER BUILDINGS, V35, P863, DOI 10.1016/S0378-7788(02)00244-X  
PARTI M, 1980, BELL J ECON, V11, P309, DOI 10.2307/3003415  
Sanquist T.F., 2012, ENER POLICY, V42, P240  
Summerfield AJ, 2007, ENER BUILDINGS, V39, P783, DOI 10.1016/j.enbuild.2007.02.012  
Summerfield AJ, 2010, BUILD RES INF, V38, P42, DOI 10.1080/09613210903262512  
Szumilas M, 2010, J CAN ACAD CHILD ADO, V19, P227  
Terry N, 2016, BUILD RES INF, V44, P175, DOI 10.1080/09613218.2015.1040284  
Tiwari P, 2000, J POLICY MODEL, V22, P81, DOI 10.1016/S0161-8938(98)00003-9  
Tso GKF, 2007, ENERGY, V32, P1761, DOI 10.1016/j.energy.2006.11.010  
Tso GKF, 2003, ENERGY, V28, P1671, DOI 10.1016/S0360-5442(03)00153-1  
Wiesmann D, 2011, ENER POLICY, V39, P2772, DOI 10.1016/j.enpol.2011.02.047  
Zhou SJ, 2013, ENER POLICY, V61, P394, DOI 10.1016/j.enpol.2013.06.092  
Zimmermann J.P., 2012, R66141 INT

NR 46

TC 6

Z9 6

U1 0

U2 7

PU ELSEVIER SCIENCE SA

PI LAUSANNE

PA PO BOX 564, 1001 LAUSANNE, SWITZERLAND

SN 0378-7788

EI 1872-6178

J9 ENER BUILDINGS

JI Energy Build.

PD APR 1

PY 2016

VL 117

BP 71

EP 82

DI 10.1016/j.enbuild.2016.02.020

PG 12

WC Construction & Building Technology; Energy & Fuels; Engineering, Civil

SC Construction & Building Technology; Energy & Fuels; Engineering

GA DI8LA

UT WOS:000373751300008

OA gold

DA 2018-05-03

ER

PT J

AU Sheikhi, A

Rayati, M

Ranjbar, AM

AF Sheikhi, Aras

Rayati, Mohammad

Ranjbar, Ali Mohammad

TI Demand side management for a residential customer in multi-energy systems

SO SUSTAINABLE CITIES AND SOCIETY

LA English

DT Article

DE Residential customer; Demand side management; Multi-energy system (MES);  
Reinforcement learning

ID SMART ENERGY HUBS; ELECTRICITY; OPERATION; FUTURE; UNCERTAINTY;  
CONSUMPTION; SIMULATION; NETWORKS; DESIGN; GAME

AB Today, as a consequence of the growing installation of efficient technologies, e.g. micro-combined heat and power (micro-CHP), the integration of traditionally separated electricity and natural gas networks has been attracting attentions from researchers in both academia and industry. To model the interaction among electricity and natural gas networks in distribution systems, this paper models a residential customer in a multi-energy system (MES). In this paper, we propose a fully automated energy management system (EMS) based on a reinforcement learning (RL) algorithm to motivate residential customers for participating in demand side management (DSM) programs and reducing the peak load in both electricity and natural gas networks. This proposed EMS estimates the residential customers' satisfaction function, energy prices, and efficiencies of appliances based on the residential customers' historical actions. Simulations are performed for the sample model and results depict how much of each energy, i.e. electricity and natural gas, the residential customer should consume and how much of natural gas should be converted in order to meet electricity and heating loads. It is also shown that the proposed RL algorithm reduces residential customer energy bill and electrical peak load up to 20% and 24%, respectively. (C) 2016 Elsevier Ltd. All rights reserved.

C1 [Sheikhi, Aras; Rayati, Mohammad; Ranjbar, Ali Mohammad] Sharif Univ Technol, Ctr Excellence Power Syst Control & Management, Dept Elect Engn, Tehran, Iran.

RP Sheikhi, A (reprint author), Sharif Univ Technol, Ctr Excellence Power Syst Control & Management, Dept Elect Engn, Tehran, Iran.

EM sheikhi@ee.sharif.edu; m-rayati@ee.sharif.edu; aranjbar@sharif.edu

CR Ameri M, 2016, ENER BUILDINGS, V110, P135, DOI 10.1016/j.enbuild.2015.10.050  
Nguyen AT, 2014, APPL ENERG, V113, P1043, DOI 10.1016/j.apenergy.2013.08.061  
Brohus H, 2012, ENER BUILDINGS, V55, P127, DOI 10.1016/j.enbuild.2012.07.013  
Cesena EAM, 2015, ENER POLICY, V82, P222, DOI 10.1016/j.enpol.2015.03.012  
Cho H., 2009, ENERGY BUILDINGS, V41  
Daneshfar F, 2010, IET GENER TRANSM DIS, V4, P13, DOI 10.1049/iet-gtd.2009.0168  
del Real AJ, 2014, INT J ELEC POWER, V54, P65, DOI 10.1016/j.ijepes.2013.06.035  
Ellamla HR, 2015, J POWER SOURCES, V293, P312, DOI 10.1016/j.jpowsour.2015.05.050  
Fang X., 2011, IEEE COMMUNICATIONS, V14  
Geidl M, 2007, IEEE POWER ENERGY M, V5, P24, DOI 10.1109/MPAE.2007.264850  
Giupponi L, 2005, IEEE IPCCC, P621  
Gomes A, 2007, IEEE T POWER SYST, V22, P1004, DOI 10.1109/TPWRS.2007.901468  
Gonzalez AM, 2005, IEEE T POWER SYST, V20, P13, DOI 10.1109/TPWRS.2004.840412  
Harish VSKV, 2016, RENEW SUST ENER REV, V56, P1272, DOI 10.1016/j.rser.2015.12.040  
Kadar P, 2011, P INT C REN EN POW Q  
Li XW, 2014, RENEW SUST ENER REV, V37, P517, DOI 10.1016/j.rser.2014.05.056  
Magnier L, 2010, BUILD ENVIRON, V45, P739, DOI 10.1016/j.buildenv.2009.08.016  
Maharjan S, 2013, IEEE T SMART GRID, V4, P120, DOI 10.1109/TSG.2012.2223766  
Mancarella P., 2013, BULK POW SYST DYN CO, V1, P25  
Mancarella P, 2014, ENERGY, V65, P1, DOI 10.1016/j.energy.2013.10.041  
Mancarella P, 2013, IEEE T SMART GRID, V4, P1928, DOI 10.1109/TSG.2013.2258413  
Mohsenian-Rad AH, 2010, IEEE T SMART GRID, V1, P320, DOI 10.1109/TSG.2010.2089069  
Nelson P., 2007, P 23 INT EL VEH S EX  
O'Neill D., 2010, P IEEE SMART GRID CO  
Pazouki S, 2014, INT J ELEC POWER, V61, P335, DOI 10.1016/j.ijepes.2014.03.038  
Powell W. B., 2007, APPROXIMATE DYNAMIC  
Rastegar M, 2015, ENER BUILDINGS, V107, P234, DOI 10.1016/j.enbuild.2015.07.028  
Samadi P, 2012, IEEE T SMART GRID, V3, P1170, DOI 10.1109/TSG.2012.2203341  
Sheikhi A., 2014, ELECT POWER ENERGY S, V64, P1007  
Sheikhi A, 2015, ENERGY, V89, P490, DOI 10.1016/j.energy.2015.05.109  
Sheikhi A, 2015, IEEE T SMART GRID, V6, P675, DOI 10.1109/TSG.2014.2377020  
Sutton R., 1998, REINFORCEMENT LEARNI  
U.S. Federal Energy Regulatory Commission, 2008, ASS DEM RESP ADV MET  
Vojdani A, 2008, IEEE POWER ENERGY M, V6, P71, DOI 10.1109/MPE.2008.929744  
Wang YF, 2011, IEEE T SMART GRID, V2, P23, DOI 10.1109/TSG.2011.2105287

Watkins C. J. C. H., 1989, THESIS  
 Wen Z., 2014, OPTIMAL DEMAND RESPO, P1401  
 Yu W, 2006, ELECTR POW SYST RES, V76, P445, DOI 10.1016/j.epsr.2005.09.013

NR 38

TC 6

Z9 6

U1 0

U2 1

PU ELSEVIER SCIENCE BV

PI AMSTERDAM

PA PO BOX 211, 1000 AE AMSTERDAM, NETHERLANDS

SN 2210-6707

EI 2210-6715

J9 SUSTAIN CITIES SOC

JI Sust. Cities Soc.

PD APR

PY 2016

VL 22

BP 63

EP 77

DI 10.1016/j.scs.2016.01.010

PG 15

WC Construction & Building Technology; GREEN & SUSTAINABLE SCIENCE &  
 TECHNOLOGY; Energy & Fuels

SC Construction & Building Technology; Science & Technology - Other Topics;  
 Energy & Fuels

GA EE1CP

UT WOS:000389318700007

DA 2018-05-03

ER

PT J

AU Taniguchi, A

Inoue, T

Otsuki, M

Yamaguchi, Y

Shimoda, Y

Takami, A

Hanaoka, K

AF Taniguchi, Ayako

Inoue, Takuya

Otsuki, Masaya

Yamaguchi, Yohei

Shimoda, Yoshiyuki

Takami, Akinobu

Hanaoka, Kanako

TI Estimation of the contribution of the residential sector to summer peak  
 demand reduction in Japan using an energy end-use simulation model

SO ENERGY AND BUILDINGS

LA English

DT Article

DE Electricity load curve; Residential electricity demand; Bottom-up type  
 simulation model; Electricity saving measures; Behavioral change

ID INHABITANTS; PREDICTION; BUILDINGS; BEHAVIOR

AB The effect of electricity peak demand reduction by electricity saving measures in the Japanese residential sector on the power system scale during summer was evaluated through the use of a simulation model developed by the authors. In order to simulate the electricity peak demand on the power system scale, the model was improved so as to (1) represent the household distribution and residential stock on the power

system scale and (2) improve the temporal resolution of the simulation. The proposed model is a bottom-up type model that simulates residential electricity demand based on occupant behavior considering numerous factors, such as family composition, residence floor area, and building insulation level. Therefore, the proposed model can be used to evaluate both occupant behavioral changes and energy conservation technologies. As a result, we determined that the most influential behavioral measure in reducing summer peak demand is turning off the lights. The peak demand reduction effect when 5% of households turned off the lights was 13 MW, which is equivalent to approximately 0.2% of the residential electricity demand during the daytime in summer in the Kansai region. The model also clarified differences in the electricity savings for each countermeasure among several family composition categories. (C) 2015 Elsevier B.V. All rights reserved.

C1 [Taniguchi, Ayako; Inoue, Takuya; Otsuki, Masaya; Yamaguchi, Yohei; Shimoda, Yoshiyuki] Osaka Univ, Grad Sch Engr, Div Sustainable Energy & Environm Engr, 2-1 Yamada Oka, Suita, Osaka 5650871, Japan. [Taniguchi, Ayako; Yamaguchi, Yohei; Shimoda, Yoshiyuki] Japan Sci & Technol Agcy, CREST, Tokyo, Japan.

[Takami, Akinobu; Hanaoka, Kanako] Kansai Elect Power Co Inc, Sales Dept, Osaka, Japan.

RP Taniguchi, A (reprint author), Osaka Univ, Grad Sch Engr, Div Sustainable Energy & Environm Engr, 2-1 Yamada Oka, Suita, Osaka 5650871, Japan.; Taniguchi, A (reprint author), Japan Sci & Technol Agcy, CREST, Tokyo, Japan.

EM a-taniguchi@ue.see.eng.osaka-u.ac.jp

CR Baker N, 1996, ENER G BUILDINGS, V23, P175, DOI 10.1016/0378-7788(95)00942-6

Famuyibo AA, 2012, ENER G BUILDINGS, V50, P150, DOI 10.1016/j.enbuild.2012.03.033

Habara H., 2004, J HUM LIVING ENV, V11, P83

Habara H., 2014, J ENV ENG T AIJ, V79, P1071

Haldi F, 2010, BUILD ENVIRON, V45, P2440, DOI 10.1016/j.buildenv.2010.05.010

Higashino M., 2014, P 2 AS C INT BUILD P, P712

Institute for Building Environment and Energy Conservation (IBEC), CALC METH PRIM EN CO

Japan Refrigeration and Air Conditioning Industry Association, 1999, JRA4046

JONES PJ, 2001, P 7 INT IBPSA C RIO, P175

Swan Lukas G, 2009, RENEW SUST ENER G REV, V13, P1819, DOI DOI 10.1016/J.RSER.2008.09.033

Michalik G, 1997, ENERGY, V22, P937, DOI 10.1016/S0360-5442(97)00029-7

Parekh A., 2005, P 9 INT IBPSA C MONT, P921

Richardson I, 2010, ENER G BUILDINGS, V42, P1878, DOI 10.1016/j.enbuild.2010.05.023

Schweiker M, 2012, J BUILD PERFORM SIMU, V5, P55, DOI 10.1080/19401493.2011.567422

Shimoda Y, 2007, ENERGY, V32, P1617, DOI 10.1016/j.energy.2007.01.007

Shimoda Y, 2010, APPL ENER G, V87, P1944, DOI 10.1016/j.apenergy.2009.10.021

Statistics Bureau Ministry of Internal Affairs and Communications, 2010 POP CENS JAP

Statistics Bureau, 2006, 2006 SURV TIM US LEI

Tanimoto J, 2008, ENER G BUILDINGS, V40, P316, DOI 10.1016/j.enbuild.2007.02.032

Tanimoto J, 2010, J BUILD PERFORM SIMU, V3, P155, DOI 10.1080/19401490903580767

Widen J, 2010, APPL ENER G, V87, P1880, DOI 10.1016/j.apenergy.2009.11.006

Yamaguchi Y., 2012, P 2014 ACEEE SUMM ST

Yamaguchi Y., 2014, P 2 AS C INT BUILD P, P617

NR 23

TC 6

Z9 6

U1 0

U2 4

PU ELSEVIER SCIENCE SA

PI LAUSANNE

PA PO BOX 564, 1001 LAUSANNE, SWITZERLAND

SN 0378-7788

EI 1872-6178

J9 ENER G BUILDINGS

J1 Energy Build.

PD JAN 15

PY 2016

VL 112

BP 80

EP 92

DI 10.1016/j.enbuild.2015.11.064

PG 13

WC Construction &amp; Building Technology; Energy &amp; Fuels; Engineering, Civil

SC Construction &amp; Building Technology; Energy &amp; Fuels; Engineering

GA DF7SH

UT WOS:000371557400009

DA 2018-05-03

ER

FN Clarivate Analytics Web of Science

VR 1.0

PT J

AU Galvin, R

Terry, N

AF Galvin, Ray

Terry, Nicola

TI Selling energy savings in the United Kingdom: A case study of top-down  
pro-environmental behaviour change in commercial office buildings

SO ENERGY RESEARCH &amp; SOCIAL SCIENCE

LA English

DT Article

DE Energy saving; Commercial office buildings; Building energy management;  
Selling energy savingsID EFFICIENCY; CONSUMPTION; COMMUNITIES; PROPERTY; BARRIERS; SCIENCE;  
SECTOR

AB Energy saving in commercial office buildings is often frustrated by the complex organisational nature of the communities with a stake in building energy performance. While policy support and landlords' sustainability aspirations can give impetus towards energy saving, most consumption and savings potential is in the hands of the tenant firms. Relevant research is often framed in terms of barriers and drivers of energy saving, where reasons for lack of saving are explored. This study takes an alternative approach. It offers two case studies of central London office buildings owned by different firms with large international building fleets, both of whom have a core business commitment to sustainability and are reporting significant energy savings in these buildings. Using qualitative interviews with the top-down agents who are charged with making savings happen, the study explores the reasons savings are being made despite the kinds of barriers found more generally. It finds sustainability agendas are being driven by highly motivated agents, skilled in the art of persuasion, with strong personal relationship skills, an indefatigable positive attitude, and the flexibility to change strategies where needed. The metaphor of 'selling energy savings' is coined to frame this approach. (C) 2015 Elsevier Ltd. All rights reserved.

C1 [Galvin, Ray] Univ Cambridge, Dept Architecture, Behav & Bldg Performance, 1 Scroope Terrace, Cambridge CB2 1PX, England.

[Terry, Nicola] Qeng Ho Ltd, 130 Chesterton Rd, Cambridge CB4 1DA, England.

RP Galvin, R (reprint author), Univ Cambridge, Dept Architecture, Behav & Bldg Performance, 1 Scroope Terrace, Cambridge CB2 1PX, England.

EM rg445@cam.ac.uk; nicola@qeng-ho.org

OI Galvin, Ray/0000-0001-9279-4263; Terry, Nicola/0000-0002-1048-7268

CR Anderson ST, 2004, RESOUR ENERGY ECON, V26, P27, DOI 10.1016/j.reseneeco.2003.07.001

Axon CJ, 2012, BUILD RES INF, V40, P461, DOI 10.1080/09613218.2012.680701

Berger P, 1991, SOCIAL CONSTRUCTION

Cogner J., 1988, NECESSARY ART PERSUA

Cooremans C, 2011, ENERG EFFIC, V4, P473, DOI 10.1007/s12053-011-9125-7

de Groot HLF, 2001, ENERG ECON, V23, P717, DOI 10.1016/S0140-9883(01)00083-4

Dixon GN, 2015, ENERGY RES SOC SCI, V6, P121, DOI 10.1016/j.erss.2015.01.004

Galvin R, 2012, ENERG BUILDINGS, V50, P219, DOI 10.1016/j.enbuild.2012.03.043

Galvin R, 2010, ENERG BUILDINGS, V42, P834, DOI 10.1016/j.enbuild.2009.12.004

Harre R, 2009, J THEOR SOC BEHAV, V39, P129, DOI 10.1111/j.1468-5914.2009.00403.x

JAFFE AB, 1994, ENERG POLICY, V22, P804, DOI 10.1016/0301-4215(94)90138-4

Jakob M, 2006, ENERG POLICY, V34, P172, DOI 10.1016/j.enpol.2004.08.039

Janda KB, 2014, ENERG POLICY, V67, P48, DOI 10.1016/j.enpol.2013.08.058

Juan YK, 2010, ENERGBUILDINGS, V42, P290, DOI 10.1016/j.enbuild.2009.09.006  
 Kneifel J, 2010, ENERGBUILDINGS, V42, P333, DOI 10.1016/j.enbuild.2009.09.011  
 Lam JC, 1996, BUILD ENVIRON, V31, P27, DOI 10.1016/0360-1323(95)00031-3  
 Lozano R, 2013, CORP SOC RESP ENV MA, V20, P275, DOI 10.1002/csr.1290  
 LUTZENHISER L, 1992, ENERGY, V17, P47, DOI 10.1016/0360-5442(92)90032-U  
 Meerbeek B, 2014, BUILD ENVIRON, V79, P66, DOI 10.1016/j.buildenv.2014.04.023  
 Moezzi M, 2014, ENERGY RES SOC SCI, V1, P30, DOI 10.1016/j.erss.2014.03.014  
 Pink D., 2012, TO SELL IS HUMAN  
 Pivo G, 2008, BUILD RES INF, V36, P20, DOI 10.1080/09613210701574795  
 Sandberg P, 2003, ENERGPOLICY, V31, P1623, DOI 10.1016/S0301-4215(02)00228-8  
 Schleich J, 2008, ENERGECON, V30, P449, DOI 10.1016/j.eneco.2006.08.004  
 Siebenhuner B, 2007, BUSINESS STRATEGY EN, V16, P339, DOI DOI 10.1002/BSE.579  
 Sovacool BK, 2014, ENERGY RES SOC SCI, V1, P1, DOI 10.1016/j.erss.2014.02.003  
 STERN PC, 1993, SCIENCE, V260, P1897, DOI 10.1126/science.260.5116.1897  
 Tetlow RM, 2014, BUILD ENVIRON, V81, P234, DOI 10.1016/j.buildenv.2014.07.003  
 Thomas G., 2011, DO YOUR CASE STUDY  
 Urge-Vorsatz D, 2007, BUILD RES INF, V35, P379, DOI 10.1080/09613210701325883  
 Weber L, 1997, ENERGPOLICY, V25, P833, DOI 10.1016/S0301-4215(97)00084-0

NR 31

TC 6

Z9 6

U1 1

U2 2

PU ELSEVIER SCIENCE BV

PI AMSTERDAM

PA PO BOX 211, 1000 AE AMSTERDAM, NETHERLANDS

SN 2214-6296

EI 2214-6326

J9 ENERGY RES SOC SCI

JI Energy Res. Soc. Sci.

PD JAN

PY 2016

VL 11

BP 155

EP 163

DI 10.1016/j.erss.2015.10.001

PG 9

WC Environmental Studies

SC Environmental Sciences &amp; Ecology

GA DQ8AD

UT WOS:000379430400015

DA 2018-05-03

ER

PT J

AU Bonnington, O

AF Bonnington, Oliver

TI The Indispensability of Reflexivity to Practice: The Case of Home Energy Efficiency

SO JOURNAL OF CRITICAL REALISM

LA English

DT Article

DE climate change; cold-related morbidity; home energy efficiency; morphogenesis; reflexivity; social practice

ID SOCIAL PRACTICE; CONSUMPTION; POLICY; DIFFUSION; HABITUS; GAP

AB This article offers new theoretical and empirical insights into decision-making with regard to the domestication and incorporation of home energy efficiency (HEE) artefacts. These items, such as insulation and heating systems, are currently of high social, political and environmental importance. Researchers



investigating energy consumption and related topics have recently turned to theories of practice - especially that proposed by Shove and colleagues which treat humans as 'carriers'. In contrast, this article uses realist social theory to afford a pivotal role to reflexivity in practice. Individual case studies, derived from in-depth interviews, are used to explore Archer's communicative, autonomous and meta-reflexive modes. And, at the same time, Archer's distinction between natural, practical and social orders of reality is used to show the importance of embodied and practical knowledge in HEE practices. As such, this article takes the theoretical focus in this research area beyond dispositions and attitudes, and argues that the way artefacts are domesticated in the course of householders' pursuit of that which matters most to them may have significant social implications that contemporary forms of practice theory seem unable to account for. Sustainability policy, therefore, should be sensitive to the concerns of householders and the indispensability of reflexivity to home energy efficiency practices.

C1 [Bonnington, Oliver] London Sch Hyg & Trop Med, Sociol, London WC1H 9SH, England.

RP Bonnington, O (reprint author), London Sch Hyg & Trop Med, Fac Publ Hlth & Policy, Dept Social & Environm Hlth Res, 15-17 Tavistock Pl, London WC1H 9SH, England.

EM oliver.bonnington@lshtm.ac.uk

FU National Institute for Health Research Public Health Research Programme [11/3005/31]

FX This project was funded by the National Institute for Health Research Public Health Research Programme (project number 11/3005/31). The views and opinions expressed therein are those of the author and do not necessarily reflect those of the Public Health Research Programme, NIHR, NHS, or the Department of Health. The author would like to thank the participants who took part in the study and Judith Green for her constructive comments on an earlier draft. I also thank two anonymous reviewers for their valuable comments and suggestions, which have improved the manuscript.

CR Adams M, 2006, SOCIOLOGY, V40, P511, DOI 10.1177/003803850663672

Archer M, 2007, MAKING OUR WAY WORLD

Archer M, 2000, BEING HUMAN PROBLEM

Archer M., 2003, STRUCTURE AGENCY INT

Archer MS, 2012, REFLEXIVE IMPERATIVE IN LATE MODERNITY, P1, DOI 10.1017/CBO9781139108058

Archer M. S., 2009, CONVERSATIONS REFLEX, P1

Archer M.S., 1995, REALIST SOCIAL THEOR

Archer M. S., 2000, RATIONAL CHOICE THEO

Ball R., 1999, NZ EC PAPERS, V33, P5

Bartiaux F., 2014, BUILD RES INF, V42, P1

Bhaskar Roy, 1998, POSSIBILITY NATURALI

Blue S., 2014, CRITICAL PUBLIC HLTH, DOI 10.1080/09581596.2014.980396

Bourdieu Pierre, 1992, INVITATION REFLEXIVE

Bourdieu P., 1977, OUTLINE THEORY PRACT

Braun V., 2007, QUALITATIVE RES PSYC, V3, P77, DOI DOI 10.1191/1478088706QP0630A

Cabinet Office, 2011, BEH CHANG EN US

COLTRANE S, 1986, ENERG POLICY, V14, P133, DOI 10.1016/0301-4215(86)90124-2

Darby S, 2006, ENERG POLICY, V34, P2929, DOI 10.1016/j.enpol.2005.04.013

Dearing JW, 2008, J PUBLIC HEALTH MAN, V14, P99, DOI 10.1097/01.PHH.0000311886.98627.b7

Defra (Department for Environment Food and Rural Affairs), 2007, UK EN EFF ACT PLAN 2

DoH (Department of Health), 2011, COLD WEATH PLAN ENGL

Elder-Vass D, 2007, SOCIOLOG THEOR, V25, P325, DOI 10.1111/j.1467-9558.2007.00312.x

Evans E, 2014, J CRIT REALISM, V13, P304, DOI 10.1179/1476743014Z.00000000032

Fleetwood S., 2008, J I ECON, V4, P183, DOI DOI 10.1017/S1744137408000957

Flyvbjerg B, 2006, QUAL INQ, V12, P219, DOI 10.1177/1077800405284363

Foucault Michel, 1990, HIST SEXUALITY USE P

Frankfurt H, 1988, IMPORTANCE WHAT WE C

Giddens Anthony, 1984, CONSTITUTION SOC

Hargreaves T, 2011, J CONSUM CULT, V11, P79, DOI 10.1177/1469540510390500

Hills J., 2011, 69 CASE

HIRST E, 1990, RESOUR CONSERV RECY, V3, P267, DOI 10.1016/0921-3449(90)90023-W

Hitchings R, 2015, LOCAL ENVIRON, V20, P369, DOI 10.1080/13549839.2013.852524

HOLLIS M., 1987, CUNNING REASON  
 JAFFE AB, 1994, ENER POLICY, V22, P804, DOI 10.1016/0301-4215(94)90138-4  
 Lawson T., 2006, EC REALITY  
 Marechal K, 2009, J ECON ISSUES, V43, P69, DOI 10.2753/JEI0021-3624430104  
 Marmott Review Team, 2011, HLTH IMP COLD HOM FU  
 McMichael M, 2013, ENER POLICY, V53, P159, DOI 10.1016/j.enpol.2012.10.039  
 Mead G. H., 1938, PHILOS ACT  
 Mouzelis NP, 2008, MODERN AND POSTMODERN SOCIAL THEORIZING: BRIDGING THE DIVIDE,  
 P1, DOI 10.1017/CBO9780511811418  
 Murphy S, 2011, J MARKET MANAG, V27, P1322, DOI 10.1080/0267257X.2011.627366  
 Neij L., 2009, CHOICE DECISION DETE  
 Palmer J., 2013, UK HOUSING ENERGY FA  
 Reckwitz A., 2002, EUR J SOC THEORY, V5, P243, DOI [10.1177/13684310222225432, DOI  
 10.1177/13684310222225432]  
 Ropke I, 2009, ECOL ECON, V68, P2490, DOI 10.1016/j.ecolecon.2009.05.015  
 Royston S, 2014, ENERGY RES SOC SCI, V2, P148, DOI 10.1016/j.erss.2014.04.016  
 Sayer A, 2011, WHY THINGS MATTER PE  
 Sayer A., 2013, SUSTAINABLE PRACTICE, P330  
 Schatzki T., 1996, SOCIAL PRACTICES WIT  
 Shove E., 2012, DYNAMICS SOCIAL PRAC  
 Shove E, 2014, THEOR CULT SOC, V31, P41, DOI 10.1177/0263276414536746  
 Shove E, 2010, ENVIRON PLANN A, V42, P1273, DOI 10.1068/a42282  
 Silverman D., 2011, INTERPRETING QUALITA  
 Spaargaren G, 2011, GLOBAL ENVIRON CHANG, V21, P813, DOI 10.1016/j.gloenvcha.2011.03.010  
 Sweetman P, 2003, SOCIOL REV, V51, P528, DOI 10.1111/j.1467-954X.2003.00434.x  
 Warde A, 2005, J CONSUM CULT, V5, P131, DOI DOI 10.1177/1469540505053090  
 Wilhite H., 2013, CULTURES OF ENERGY, P60  
 Wilhite H, 2008, ENER EFFIC, V1, P121, DOI 10.1007/s12053-008-9006-x  
 Winther T, 2013, ENER EFFIC, V6, P369, DOI 10.1007/s12053-012-9170-x  
 Yin R.K., 2014, CASE STUDY RES DESIG

NR 60

TC 6

Z9 6

U1 1

U2 9

PU ROUTLEDGE JOURNALS, TAYLOR & FRANCIS LTD

PI ABINGDON

PA 2-4 PARK SQUARE, MILTON PARK, ABINGDON OX14 4RN, OXON, ENGLAND

SN 1476-7430

EI 1572-5138

J9 J CRIT REALISM

J1 J. Crit. Realism

PD OCT

PY 2015

VL 14

IS 5

BP 461

EP 484

DI 10.1179/1572513815Y.0000000009

PG 24

WC Philosophy

SC Philosophy

GA CV4GD

UT WOS:000364224100002

DA 2018-05-03

ER

PT J

AU Wang, QS

Liu, P

Yuan, XL

Cheng, XX

Ma, RJ

Mu, RM

Zuo, J

AF Wang, Qingsong

Liu, Ping

Yuan, Xueliang

Cheng, Xingxing

Ma, Rujian

Mu, Ruimin

Zuo, Jian

TI Structural Evolution of Household Energy Consumption: A China Study

SO SUSTAINABILITY

LA English

DT Article

ID DECOMPOSITION ANALYSIS; MULTIVARIATE-ANALYSIS; POLICY; REQUIREMENTS;  
PERSPECTIVE; EMISSIONS; COUNTRIES; EFFICIENT; UK

AB Sustainable energy production and consumption is one of the issues for the sustainable development strategy in China. As China's economic development paradigm shifts, household energy consumption (HEC) has become a focus of achieving national goals of energy efficiency and greenhouse gas reduction. The information entropy model and LMDI model were employed in this study in order to analyse the structural evolution of HEC, as well as its associated critical factors. The results indicate that the information entropy of HEC increased gradually, and coal will be reduced by clean energies, such as natural gas and liquefied petroleum gas. The information entropy tends to stabilize and converge due to rapid urbanization. Therefore, from the perspective of environmental protection and natural resource conservation, the structure of household energy consumption will be optimized. This study revealed that residents' income level is one of the most critical factors for the increase of energy consumption, while the energy intensity is the only driving force for the reduction of HEC. The accumulated contribution of these two factors to the HEC is 240.53% and -161.75%, respectively. It is imperative to improve the energy efficiency in the residential sector. Recommendations are provided to improve the energy efficiency-related technologies, as well as the standards for the sustainable energy strategy.

C1 [Wang, Qingsong; Yuan, Xueliang; Cheng, Xingxing; Ma, Rujian] Shandong Univ, Sch Energy & Power Engr, Jinan 250061, Peoples R China.

[Liu, Ping] Shandong Univ, Sch Management, Jinan 250100, Peoples R China.

[Mu, Ruimin] Shandong Jianzhu Univ, Sch Municipal & Environm Engr, Jinan 250101, Peoples R China.

[Zuo, Jian] Univ S Australia, Sch Nat & Built Environm, Adelaide, SA 5000, Australia.

RP Yuan, XL (reprint author), Shandong Univ, Sch Energy & Power Engr, 17923 Jingshi Rd, Jinan 250061, Peoples R China.

EM wqs@sdu.edu.cn; liuping\_91@163.com; yuanxl@sdu.edu.cn;

xcheng@sdu.edu.cn; mrj2005@126.com; ruiminmu@163.com;

jian.zuo@unisa.edu.au

RI Zuo, Jian/M-3223-2016

OI Zuo, Jian/0000-0002-8279-9666

FU National Natural Science Foundation [41301640, 41471461]; Award Fund for Young Scientists of Shandong Province [BS2012SF015]; Shandong University [IFYT1401, IFYT14010]; Humanities & Social Sciences Project of Shandong Province [14-ZZ-JG-02]; Soft Science Research Plan of Shandong Province [2014RKE27057, 2014RKE27058]; Development Program of Application-Oriented Talent Training for Environmental Engineering Specialty, Shandong Province

FX This research is supported by National Natural Science Foundation (41301640, 41471461), the Award Fund for Young Scientists of Shandong Province (BS2012SF015), the Innovation Fund of Shandong University (IFYT1401, IFYT14010), the Humanities & Social Sciences Project of Shandong Province (14-ZZ-JG-02), the Soft Science Research Plan of

- Shandong Province (2014RKE27057, 2014RKE27058) and The Development Program of Application-Oriented Talent Training for Environmental Engineering Specialty, Shandong Province.
- CR Ala-Mantila S, 2014, *ECOL ECON*, V104, P129, DOI 10.1016/j.ecolecon.2014.04.019
- Allan J., 2002, *EXERGY*, V2, P295, DOI [10.1016/S1164-0235(02)00077-8, DOI 10.1016/S1164-0235(02)00077-8]
- Ang BW, 2004, *ENERG POLICY*, V32, P1131, DOI 10.1016/S0301-4215(03)00076-4
- Ang BW, 1998, *ENERGY*, V23, P489, DOI 10.1016/S0360-5442(98)00016-4
- Angelamaria M., 2014, *SUSTAINABILITY*, V6, P5730, DOI [10.3390/su6095730, DOI 10.3390/SU6095730]
- Biesiot W, 1999, *ECOL ECON*, V28, P367, DOI 10.1016/S0921-8009(98)00113-X
- BROOKES LG, 1978, *ENERG POLICY*, V6, P94, DOI 10.1016/0301-4215(78)90031-9
- BROOKES LG, 1993, *ENERG POLICY*, V21, P346, DOI 10.1016/0301-4215(93)90274-J
- Cellura M, 2012, *RENEW SUST ENERG REV*, V16, P1135, DOI 10.1016/j.rser.2011.11.016
- Chen Y. M., 2001, *HUM GEOGR*, V16, P20
- Chitnis M, 2013, *ENERG POLICY*, V55, P234, DOI 10.1016/j.enpol.2012.12.008
- Chung W, 2011, *APPL ENERG*, V88, P5180, DOI 10.1016/j.apenergy.2011.07.030
- Dai B. X., 2011, *MODERN IND EC*
- Durowoju OA, 2012, *J MANUF TECHNOL MANA*, V23, P998, DOI 10.1108/17410381211276844
- Egmond C, 2005, *ENERG POLICY*, V33, P2374, DOI 10.1016/j.enpol.2004.05.007
- Fang B., 2011, *MATH PRACT THEORY*, V2, p66 77
- [??? Fu Chonghui], 2013, [????, *Resources Science*], V35, P1933
- Galvin R, 2014, *ENERG POLICY*, V73, P323, DOI 10.1016/j.enpol.2014.02.033
- [??? Geng Haiqing], 2004, [?????, *Journal of Natural Resources*], V19, P257
- Graham P., 2013, *SUSTAINABILITY*, V5, P1406, DOI [10.3390/su5041406, DOI 10.3390/SU5041406]
- GRUBB M, 1992, *ENERG POLICY*, V20, P392, DOI 10.1016/0301-4215(92)90060-F
- Hansla A, 2008, *ENERG POLICY*, V36, P768, DOI 10.1016/j.enpol.2007.10.027
- He J. K., 2015, *WUHAN U J*, V68, P5
- [??? He Renfei], 2012, [????, *Resources Science*], V34, P1142
- Heinonen J, 2013, *ENVIRON RES LETT*, V8, DOI 10.1088/1748-9326/8/3/035050
- Hertwich EG, 2005, *J IND ECOL*, V9, P85, DOI 10.1162/1088198054084635
- Huang F. X., 2011, *REV IND EC*, V10, p104 121
- Jowsey E, 2009, *INT J SUST DEV WORLD*, V16, P303, DOI 10.1080/13504500903204934
- Kasemsan M., 2008, *STOCH ENV RES RISK A*, V22, P159, DOI [10.1007/s00477-007-0106-5, DOI 10.1007/S00477-007-0106-5]
- Khazzoom D. J., 1980, *ENERGY J*, V11, P21
- Larry L. S., 1999, *INT J IMPACT ENG*, V23, p869 882, DOI [10.1016/S0734-743X(99)00131-1, DOI 10.1016/S0734-743X(99)00131-1]
- Lenzen M, 2006, *ENERGY*, V31, P181, DOI 10.1016/j.energy.2005.01.009
- Lenzen M, 2004, *ECOL ECON*, V49, P375, DOI 10.1016/j.ecolecon.2004.01.019
- [??? LI Yanmei], 2008, [????, *Resources Science*], V30, P890
- Linden AL, 2006, *ENERG POLICY*, V34, P1918, DOI 10.1016/j.enpol.2005.01.015
- MACQUEEN J, 1975, *P NATL ACAD SCI USA*, V72, P3819, DOI 10.1073/pnas.72.10.3819
- Mehrara M, 2007, *ENERG POLICY*, V35, P2939, DOI 10.1016/j.enpol.2006.10.018
- Munksgaard J, 2005, *J IND ECOL*, V9, P169, DOI 10.1162/1088198054084699
- National Bureau of Statistics (NBS), 2013, *CHIN STAT YB 2013*
- Qin Y., 2013, *ECOL ECON*, V1, p64 66
- Reinhard H., 1998, *ENERG ECON*, V20, p421 442, DOI [10.1016/S0140-9883(98)00003-6, DOI 10.1016/S0140-9883(98)00003-6]
- Saunders HD, 2015, *ENERG J*, V36, P23, DOI 10.5547/01956574.36.1.2
- Schultz PW, 2001, *J ENVIRON PSYCHOL*, V21, P327
- Stern P. C., 1999, *HUMAN ECOLOGY REV*, V6, P81, DOI DOI 10.2307/2083693
- [??? Tan Yongzhong], 2003, [?????, *Journal of Natural Resources*], V18, P112
- Tomas K., 2001, *ECOL ECON*, V36, P165, DOI [10.1016/S0921-8009(00)00225-1, DOI 10.1016/S0921-8009(00)00225-1]
- Wang CJ, 2014, *SUSTAINABILITY-BASEL*, V6, P8164, DOI 10.3390/su6118164
- Wang QS, 2014, *SUSTAINABILITY-BASEL*, V6, P4858, DOI 10.3390/su6084858
- Wang QS, 2012, *STOCH ENV RES RISK A*, V26, P443, DOI 10.1007/s00477-011-0493-5
- [?? Xue Dan], 2014, [?????. ????], *Acta Scientiarum Naturalium Universitatis Pekinensis*, V50, P348

Yao XL, 2014, ENERGETICS POLICY, V73, P512, DOI 10.1016/j.enpol.2014.06.010  
 Yohanis YG, 2012, ENERGETICS POLICY, V41, P654, DOI 10.1016/j.enpol.2011.11.028  
 York R, 2007, SOC SCI RES, V36, P855, DOI 10.1016/j.ssresearch.2006.06.007  
 Yuan XL, 2011, ENERGETICS POLICY, V39, P3855, DOI 10.1016/j.enpol.2011.04.017  
 Zhao XL, 2012, ENERGETICS POLICY, V41, P644, DOI 10.1016/j.enpol.2011.11.027  
 Zheng X. Y., 2015, CHINESE HOUSEHOLD EN

NR 56

TC 6

Z9 6

U1 2

U2 33

PU MDPI AG

PI BASEL

PA ST ALBAN-ANLAGE 66, CH-4052 BASEL, SWITZERLAND

SN 2071-1050

J9 SUSTAINABILITY-BASEL

J1 Sustainability

PD APR

PY 2015

VL 7

IS 4

BP 3919

EP 3932

DI 10.3390/su7043919

PG 14

WC GREEN & SUSTAINABLE SCIENCE & TECHNOLOGY; Environmental Sciences;  
 Environmental Studies

SC Science & Technology - Other Topics; Environmental Sciences & Ecology

GA CH0MV

UT WOS:000353715400022

OA gold

DA 2018-05-03

ER

PT S

AU Poznaka, L

Laicane, I

Blumberga, D

Blumberga, A

Rosa, M

AF Poznaka, Liga

Laicane, Ilze

Blumberga, Dagnija

Blumberga, Andra

Rosa, Marika

BE Valtere, S

TI Analysis of electricity user behavior: case study based on results from  
 extended household survey

SO INTERNATIONAL SCIENTIFIC CONFERENCE ENVIRONMENTAL AND CLIMATE  
 TECHNOLOGIES, CONECT 2014

SE Energy Procedia

LA English

DT Proceedings Paper

CT International Scientific Conference on Environmental and Climate  
 Technologies (CONECT)

CY OCT 14-16, 2014

CL Riga, LATVIA

SP Riga Tech Univ, Inst Energy Syst & Environm

DE Smart meters; household energy consumption; electricity; behavior;  
multiple regression; pilot project; survey; re-survey

ID ENERGY-CONSUMPTION; SMART GRIDS; DETERMINANTS; PREDICTION; OCCUPANTS;  
CLIMATE

AB Greater emphasis on the individual consumers' engagement in energy efficiency has been integrated into the concept of a comprehensive European energy policy. Households, as well as the people living there are very different and one of the important factors is to assess a consumer's behavioral aspects. Conducting surveys is the most common way to obtain this type of information. Our research is based on JSC "Latvenergo" pilot project "Promoting energy efficiency of household using smart technologies" (further - pilot project) where 500 Latvian households were installed with smart meters at the beginning of 2013. The first results have shown that the average electricity consumption in the target group decreased by 23 %. In order to explain the results, research was carried out by analyzing 1) what kind of behavioral and motivation factors influenced changes in electricity consumption; and 2) to what extent changes in electricity consumption were affected by smart meters. Three multiple linear regression models were tested on the basis of first survey data of 430 households and 8 selected households, who were re-interviewed in March - April, 2014. The results show that changes in electricity consumption are not influenced only by technical aspects, but also by users' psychological aspects, such as subconscious and belonging to the social group. (C) 2015 The Authors. Published by Elsevier Ltd.

C1 [Poznaka, Liga; Laicane, Ilze; Blumberga, Dagnija; Blumberga, Andra; Rosa, Marika] Riga Tech Univ, Inst Energy Syst & Environm, LV-1048 Riga, Latvia.

RP Poznaka, L (reprint author), Riga Tech Univ, Inst Energy Syst & Environm, Azenes Iela 12-1, LV-1048 Riga, Latvia.

EM poznaka.liga@gmail.com

OI Blumberga, Andra/0000-0002-4712-4794

CR Baker KJ, 2008, APPL ENERG, V85, P475, DOI 10.1016/j.apenergy.2007.09.004

Bartusch C, 2012, APPL ENERG, V92, P637, DOI 10.1016/j.apenergy.2011.04.034

Bedir M., 2012, ENERG BUILDINGS, V58, P194

Chen J, 2013, ENERG BUILDINGS, V66, P193, DOI 10.1016/j.enbuild.2013.07.045

Clastres C, 2011, ENERG POLICY, V39, P5399, DOI 10.1016/j.enpol.2011.05.024

Eurostat manuals and guidelines, 2013, EUR MAN GUID MAN STA

Eurostat European Commission, 2014, DAT EL CONS HOUS SEC

Gara E, 2010, ENV CLIMATE TECHNOLO, V13, P35

Graabak I., 2014, ENV CLIMATE TECHNOLO, V13, P12

Hierzinger R., 2012, EUROPEAN SMART METER

Kavousian A, 2013, ENERGY, V55, P184, DOI 10.1016/j.energy.2013.03.086

Laicane I., 2014, Agronomy Research, V12, P527

Leahy E., 2009, 277 ESRI

McLoughlin F, 2012, ENERG BUILDINGS, V48, P240, DOI 10.1016/j.enbuild.2012.01.037

Mondol J.D, 2007, ENERG BUILDINGS, V40, P1053

Olaniyan MJ, 2014, ENERG POLICY, V69, P273, DOI 10.1016/j.enpol.2013.12.023

Orlando E., 2010, ENERGY EFFICIENCY IN

Sanquist TF, 2012, ENERG POLICY, V42, P354, DOI 10.1016/j.enpol.2011.11.092

Sardianou E, 2007, ENERG POLICY, V35, P3778, DOI 10.1016/j.enpol.2007.01.020

Siano P, 2014, RENEW SUST ENERG REV, V30, P461, DOI 10.1016/j.rser.2013.10.022

Stemmers K, 2009, BUILD RES INF, V37, P625, DOI 10.1080/09613210903186661

Wissner M, 2011, APPL ENERG, V88, P2509, DOI 10.1016/j.apenergy.2011.01.042

Wu X, 2004, ENERG ECON, V26, P345, DOI 10.1016/j.eneco.2004.04.011

Yang Z, 2014, INT J ELEC POWER, V56, P209, DOI 10.1016/j.ijepes.2013.11.023

Yohanis Y.G., 2011, ENERG POLICY, V41, P654

Zahare D, 2011, ENV CLIMATE TECHNOLO, V7, P125

Zhou S, ENERGY POLICY, V61, P394

Zogla G, 2010, ENV CLIMATE TECHNOLO, V13, P130

[Anonymous], 2013, MANUAL STAT ENERGY C

NR 29

TC 6

Z9 6

U1 0

U2 4

PU ELSEVIER SCIENCE BV  
 PI AMSTERDAM  
 PA SARA BURGERHARTSTRAAT 25, PO BOX 211, 1000 AE AMSTERDAM, NETHERLANDS  
 SN 1876-6102  
 J9 ENRGY PROCED  
 PY 2015  
 VL 72  
 BP 79  
 EP 86  
 DI 10.1016/j.egypro.2015.06.012  
 PG 8  
 WC Energy & Fuels; Environmental Sciences  
 SC Energy & Fuels; Environmental Sciences & Ecology  
 GA BD3RL  
 UT WOS:000360103400011  
 OA gold  
 DA 2018-05-03  
 ER

PT J  
 AU Hope, AJ  
 Booth, A  
 AF Hope, Alexander John  
 Booth, Alexander  
 TI Attitudes and behaviours of private sector landlords towards the energy  
 efficiency of tenanted homes

SO ENERGY POLICY

LA English

DT Article

DE Energy efficiency; Energy policy; Green Deal; Housing; Rented sector

ID REHABILITATION PROGRAM; EXISTING BUILDINGS; CLIMATE-CHANGE; GREEN DEAL;  
 UK; POLICY; DWELLINGS; BARRIERS; ENGLAND

AB The UK's housing stock generates approximately 27% of the country's total annual carbon emissions. In light of the legally binding targets to reduce carbon emissions, new housing is subject to a tightening of regulations governing energy demand and efficiency resulting in a gradual improvement in carbon emissions. The question is how to achieve the deep carbon emission reductions from existing domestic properties, of which 75% will still be in use in 2050. Government has sought to provide incentives to homeowners to improve the energy efficiency of their households, and mandate improvements in socially rented housing using a range of fiscal measures, most recently the 'Green Deal'. There has however been little consideration of the 18% of UK households who privately rent their home, a tenure that is growing fast. The aim of this research is to investigate the factors that influence private sector landlords when considering energy efficiency improvements to their tenanted homes. The results indicate that government policy has consistently failed to engage private sector landlords in the issue of energy efficiency and thus measures must be taken to understand the motivations of landlords in order to design effective incentives and interventions. (C) 2014 Elsevier Ltd. All rights reserved.

C1 [Hope, Alexander John] Northumbria Univ, Newcastle Business Sch, Fac Business & Law, Newcastle Upon Tyne NE1 8ST, Tyne & Wear, England.

[Booth, Alexander] Northumbria Univ, Fac Engn & Environm, Newcastle Upon Tyne NE1 8ST, Tyne & Wear, England.

RP Hope, AJ (reprint author), Northumbria Univ, Newcastle Business Sch, Fac Business & Law, City Campus East 1, Newcastle Upon Tyne NE1 8ST, Tyne & Wear, England.

EM alex.hope@northumbria.ac.uk; alexander.booth@northumbria.ac.uk

OI Hope, Alex/0000-0001-8634-1911

CR All Party Group for Excellence in the Built Environment, 2013, REEN GREEN AG

Astmarsson B, 2013, ENER POLICY, V63, P355, DOI 10.1016/j.enpol.2013.08.046

Ayush T, 2008, 2008 SYSTEMS AND INFORMATION ENGINEERING DESIGN SYMPOSIUM, P65, DOI 10.1109/SIEDS.2008.4559687

Bell M, 2000, ENER BUILDINGS, V32, P267, DOI 10.1016/S0378-7788(00)00053-0

- Bird S, 2012, ENER POLICY, V48, P506, DOI 10.1016/j.enpol.2012.05.053
- Boardman B, 1991, FUEL POVERTY COLD HO
- Brechling V., 1991, EC POLICY ENV
- Brechling V, 1994, FISCAL STUDIES, V15, P44, DOI DOI 10.1111/J.1475-5890.1994.TB00196.X
- Briggs B., 2014, GUARDIAN
- Burford I, 2012, J ENVIRON ECON MANAG, V64, P153, DOI 10.1016/j.jeem.2012.05.002
- Chahal S, 2012, P RETR 2012 C
- CIH, 2013, PRIV RENT SECT
- Clarke JA, 2008, ENER POLICY, V36, P4605, DOI 10.1016/j.enpol.2008.09.004
- DCLG, 2011, PRIV LANDL SURV 2010
- DCLG, 2006, DEC HOM DEF GUID IMP
- DCLG (Department for Communities and Local Government), 2012, ENGL HOUS SURV HOUS
- Department for Communities and Local Government (DCLG), 2014, ENGL HOUS SURV HEADL
- DECC, 2014, DOM GREEN DEAL EN CO
- DECC, 2013, GREEN DEAL CASHB EN
- DECC, 2013, 125M GREEN DEAL CASH
- Department of Energy and Climate Change [ DECC], 2010, GREEN DEAL SUMM GOV
- DECC, 2012, GREEN DEAL NEW WAY O
- DECC, 2011, EN ACT AID MEM
- DECC (Department of Energy and Climate Change), 2012, ANN REP FUEL POV STA
- DECC, 2011, EXTR HELP IT IS NEED
- DECC, 2012, FIN STAG IMP ASS GRE
- DECC, 2011, CARB PLAN DEL OUR LO
- DECC, 2012, QUICK GUID EN CO OBL
- DECC, 2011, REP ART 4 14 EU END
- DECC, 2012, GREEN DEAL EN CO OBL
- DECC, 2013, STAND ASS PROC
- Dowson M, 2012, ENER POLICY, V50, P294, DOI 10.1016/j.enpol.2012.07.019
- Easdon W., 2013, ATTITUDES PERCEPTION
- Gabriel M., 2010, 125 AHURI
- Gadenne D, 2011, ENER POLICY, V39, P7684, DOI 10.1016/j.enpol.2011.09.002
- Gilbertson J, 2006, SOC SCI MED, V63, P946, DOI 10.1016/j.socscimed.2006.02.021
- Gillingham K., 2012, ENERGY J, V33, P33
- Hamilton B, 2010, COMP ENERGY EFFICIEN
- Hong SH, 2009, BUILD ENVIRON, V44, P1228, DOI 10.1016/j.buildenv.2008.09.003
- Huhne C., 2010, C HUHNE GREEN DEAL W
- Hulme J., 2012, ENERGY EFFICIENCY HO
- IEA, 2008, PROM EN EFF INV CAS
- IEA, 2007, MIND GAP QUANT PRINC
- Jenkins D, 2011, STUDY FUEL POVERTY L
- Johnson K, 2012, ENER EFFIC, V5, P109, DOI 10.1007/s12053-011-9109-7
- Kelly S, 2012, RENEW SUST ENER REV, V16, P6861, DOI 10.1016/j.rser.2012.07.018
- Kofner S, 2014, J HOUS BUILT ENVIRON, V29, P255, DOI 10.1007/s10901-013-9383-0
- Kolmuss A., 2002, ENVIRON EDUC RES, V8, P239, DOI DOI 10.1080/13504620220145401
- Leyshon A, 2009, BRIT J POLIT INT REL, V11, P438, DOI 10.1111/j.1467-856X.2009.00381.x
- Lomas KJ, 2010, BUILD RES INF, V38, P1, DOI 10.1080/09613210903350937
- Lonsdale S., 2014, TELEGRAPH ONLINE
- Lorenzoni I, 2007, GLOBAL ENVIRON CHANG, V17, P445, DOI 10.1016/j.gloenvcha.2007.01.004
- Lowe R, 2009, BUILD RES INF, V37, P206, DOI 10.1080/09613210902727960
- McNeil L., 2010, WHAT IS NHER RATING
- Meen G, 2013, URBAN STUD, V50, P637, DOI 10.1177/0042098012458006
- Meyer H., 2013, GUARDIAN
- Morrison N, 2013, URBAN STUD, V50, P2569, DOI 10.1177/0042098012474512
- Murphy L., 2012, P RETR 2012 C U SALF
- NAO, 2009, WARM FRONT SCHEM
- National Housing Federation, 2012, GREEN DEAL EN CO OBL
- NLA, 2013, UND ECO
- OSCI, 2013, CHANG HOUS TEN EV CE



Palmer J, 2011, GREAT BRITAINS HOUSI  
 Roberts S, 2008, ENERG POLICY, V36, P4482, DOI 10.1016/j.enpol.2008.09.023  
 Rosenow J, 2013, ENERG EFFIC, V6, P219, DOI 10.1007/s12053-012-9181-7  
 Rosenow J, 2013, ENERG ENVIRON-UK, V24, P83, DOI 10.1260/0958-305X.24.1-2.83  
 Scanlon K., 2011, SUSTAINABLE PRIVATE  
 SWAN W., 2013, STRUCTURAL SURVEY, V31, P181  
 Vaughan A., 2013, 4 OUT 5 PEOPLE HAVE  
 Wetherill M., 2012, P RETR 2012 C U SALF  
 Wilkinson S., 2002, PROP MANAG, V20, P49  
 Willey A., 2012, P RETR 2012 C U SALF  
 Williamson M., 2011, SUPPORTING PEOPLE PR  
 Wright A, 2008, ENERG POLICY, V36, P4544, DOI 10.1016/j.enpol.2008.09.014

NR 74

TC 6

Z9 6

U1 0

U2 19

PU ELSEVIER SCI LTD

PI OXFORD

PA THE BOULEVARD, LANGFORD LANE, KIDLINGTON, OXFORD OX5 1GB, OXON, ENGLAND

SN 0301-4215

EI 1873-6777

J9 ENERG POLICY

JI Energy Policy

PD DEC

PY 2014

VL 75

BP 369

EP 378

DI 10.1016/j.enpol.2014.09.018

PG 10

WC Economics; Energy &amp; Fuels; Environmental Sciences; Environmental Studies

SC Business &amp; Economics; Energy &amp; Fuels; Environmental Sciences &amp; Ecology

GA AY5HY

UT WOS:000347604500038

DA 2018-05-03

ER

PT J

AU Qiu, YM

AF Qiu, Yueming

TI Energy Efficiency and Rebound Effects: An Econometric Analysis of Energy

Demand in the Commercial Building Sector

SO ENVIRONMENTAL &amp; RESOURCE ECONOMICS

LA English

DT Article

DE Electricity and natural gas demand; Energy efficiency; Heckman selection  
model; Price elasticity; Rebound effect

ID MICROECONOMETRIC APPROACH; ELECTRICITY DEMAND; SELECTION BIAS; DIFFUSION

AB It is widely recognized that the adoption of energy saving innovations can induce an increase in the usage of the corresponding technologies and thus can possibly increase energy consumption. Among other concerns is that uncertainties regarding the magnitude of this "rebound effect" can deter policy makers from promoting energy efficiency. This paper analyzes the rebound effects of the adoption of energy efficient technologies in commercial buildings. Based upon a structural model of technology adoption and subsequent energy demand at the building level, the empirical results are that energy efficiency can reduce electricity use by about 35 % and natural gas consumption by about 50 %.

C1 Arizona State Univ, Morrison Sch Agribusiness & Resource Management, Mesa, AZ 85212 USA.

RP Qiu, YM (reprint author), Arizona State Univ, Morrison Sch Agribusiness & Resource Management, 7231  
E Sonoran Arroyo Mall, Mesa, AZ 85212 USA.

EM yuemingq@gmail.com

- CR Ahmed A, 2010, ADV ENG INFORM, V24, P466, DOI 10.1016/j.aei.2010.06.007  
 Andrews CJ, 2009, ENER BUILDINGS, V41, P287, DOI 10.1016/j.enbuild.2008.09.009  
 Andrews CJ, 2009, ENER POLICY, V37, P541, DOI 10.1016/j.enpol.2008.09.085  
 BAKER P, 1991, OXFORD REV ECON POL, V7, P54, DOI 10.1093/oxrep/7.2.54  
 Berkhout PHG, 2000, ENER POLICY, V28, P425, DOI 10.1016/S0301-4215(00)00022-7  
 Bernard JT, 1996, CAN J ECON, V29, P92, DOI 10.2307/136153  
 Bernstein M. A., 2005, REGIONAL DIFFERENCES  
 BOHI DR, 1984, ANNU REV ENERGY, V9, P105, DOI 10.1146/annurev.eg.09.110184.000541  
 BROOKES L, 1990, ENER POLICY, V18, P199, DOI 10.1016/0301-4215(90)90145-T  
 CEC, 2003, 50003082A11 CEC  
 Dahl C, 1993, WORKING PAPER  
 Davis L., 2012, 18044 NAT BUR EC RES  
 Denton FT, 2003, LAND ECON, V79, P86, DOI 10.2307/3147107  
 Denton FT, 2000, ENERGY STUD REV, V9, P23  
 Dodd M., 2012, COMP ENERGY SAVINGS  
 DoItYourself, 2013, SAV MON EN EFF LIGHT  
 DUBIN JA, 1984, ECONOMETRICA, V52, P345, DOI 10.2307/1911493  
 EIA, 2011, EL POW GEN CONS DAT  
 EnergyStar, 2013, LIGHT BULBS  
 EnergyStar, 2013, AIR SID EC  
 EPRI, 1993, TR101638 EPRI  
 Fell H., 2010, 1057 RFF DP  
 FERC, 2011, FORM FERC 423 DAT  
 Focusonenergy, 2009, OCC SENS SAV EN MON  
 Gillingham K, 2009, ANNU REV RESOUR ECON, V1, P597, DOI 10.1146/annurev.resource.102308.124234  
 Ham JC, 1997, RAND J ECON, V28, pS113, DOI 10.2307/3087458  
 HECKMAN JJ, 1979, ECONOMETRICA, V47, P153, DOI 10.2307/1912352  
 Horowitz JM, 2004, ENERGY J, V25, P115  
 IBE, 2012, DAT MATT IMP US CBEC  
 Ito K, 2010, 210 WP HASS EN I  
 Jacobsen GD, 2011, REV EC STAT IN PRESS  
 Jenkins J., 2011, ENERGY EMERGENCE REB  
 Kemfert C, 1998, ENER ECON, V20, P249, DOI 10.1016/S0140-9883(97)00014-5  
 Khazzoom J. D., 1980, ENERGY J, V1, P21  
 Kok N, 2011, AM ECON REV, V101, P77, DOI 10.1257/aer.101.3.77  
 Koomey J, 2011, LEARNING EXAMPLE REB  
 Manne AS, 1992, BUYING GREENHOUSE IN  
 Metcalf GE, 1999, REV ECON STAT, V81, P516, DOI 10.1162/003465399558274  
 Newell RG, 2008, RESOUR ENERGY ECON, V30, P527, DOI 10.1016/j.reseneeco.2008.09.004  
 NLPPI, 2000, EL BAL  
 NRC, 2013, MUCH WILL I SAV ART  
 Pacala S, 2004, SCIENCE, V305, P968, DOI 10.1126/science.1100103  
 PARTI M, 1980, BELL J ECON, V11, P309, DOI 10.2307/3003415  
 Platss, 2004, HVAC EC  
 Qiu Y, 2013, WORKING PAPER  
 Saunders H. D., 1992, ENERGY J, V13, P131, DOI DOI 10.5547/ISSN0195-6574-EJ-V0113-N04-7  
 Wade SH, 2003, PRICE RESPONSIVENESS  
 WellHome, 2011, SKYL EN SAV TOOL

NR 48

TC 6

Z9 6

U1 1

U2 25

PU SPRINGER

PI NEW YORK

PA 233 SPRING ST, NEW YORK, NY 10013 USA  
 SN 0924-6460  
 EI 1573-1502  
 J9 ENVIRON RESOUR ECON  
 JI Environ. Resour. Econ.  
 PD OCT  
 PY 2014  
 VL 59  
 IS 2  
 BP 295  
 EP 335  
 DI 10.1007/s10640-013-9729-9  
 PG 41  
 WC Economics; Environmental Studies  
 SC Business & Economics; Environmental Sciences & Ecology  
 GA AN8UP  
 UT WOS:000340880700007  
 DA 2018-05-03  
 ER

PT S

AU Aderohunmu, F

Balsamo, D

Paci, G

Brunelli, D

AF Aderohunmu, Femi

Balsamo, Domenico

Paci, Giacomo

Brunelli, Davide

BE Langendoen, K

Hu, W

Ferrari, F

Zimmerling, M

Mottola, L

TI Long Term WSN Monitoring for Energy Efficiency in EU Cultural Heritage Buildings

SO REAL-WORLD WIRELESS SENSOR NETWORKS, REALWSN 2013

SE Lecture Notes in Electrical Engineering

LA English

DT Proceedings Paper

CT 5th International Workshop on Real-World Wireless Sensor Networks (REALWSN)

CY SEP 19-20, 2013

CL Como, ITALY

SP Politecnico Milano Dipartimento Elettronica Informazione Bioingegneria

AB Historic buildings are a distinctive and invaluable characteristic of numerous European cities, and living symbols of Europe's rich cultural heritage. However, today, EU cultural heritage buildings are contributing huge percentage to the greenhouse gas emissions. This has led to the increasing of wireless sensor network (WSN) deployments aimed at monitoring and improving the energy efficiency of these historic buildings. In this chapter we show a long term, low cost, passive distributed environmental monitoring system that promotes energy-efficient retrofitting in historic buildings. We focus on the design and implementation of an innovative technological framework, and on the hardware and software development of the solution. The presented system provides real-time feedback for the civil engineers for prompt intervention via remote interfaces.

C1 [Brunelli, Davide] Univ Trento, Dept Ind Engn DII, Via Sommar 14, Trento, Italy.

[Aderohunmu, Femi] Univ Otago, Dept Informat Sci, Dunedin, New Zealand.

[Balsamo, Domenico; Paci, Giacomo] Univ Bologna, Dept Elect Elect & Informat Engn DEI, Bologna, Italy.

RP Brunelli, D (reprint author), Univ Trento, Dept Ind Engn DII, Via Sommar 14, Trento, Italy.

EM femi.aderohunmu@otago.ac.nz; domenico.balsamo@unibo.it;  
giacomo.paci@unibo.it; davide.brunelli@unitn.it  
RI Brunelli, Davide/H-7927-2012  
OI Brunelli, Davide/0000-0001-5110-6823  
FU EU 7th Framework Programme  
FX The research leading to these results has received funding from the  
projects 3ENCULT and GreenDataNet, both funded by the EU 7th Framework  
Programme. In addition, the authors would like to thank WISPES srl for  
the implementation of the prototypes  
CR Abrardo A., 2010, NV ENERGY STRUCTURAL, P98  
Amato F. D., 2012, ENV ENERGY STRUCTURA, P1  
Anastasi G., 2009, HUM SYST INT 2009 HS, P574  
Brunelli D., 2012, ELECTRON LETT, V48, P1026, DOI 10.1049/el.2012.1246  
Caione C., 2013, IND INFORM IEEE T  
Caione C., 2012, IEEE T IND INFORM, V8, P30, DOI 10.1109/TII.2011.2173500  
CARLI D., 2011, DES AUT TEST EUR C E, P1  
Ceriotti M., 2009, 2009 INTERNATIONAL CONFERENCE ON INFORMATION PROCESSING IN  
SENSOR NETWORKS (IPSN 2009), P277  
Dondi D., 2008, 2008 IEEE INTERNATIONAL CONFERENCE ON SUSTAINABLE ENERGY  
TECHNOLOGIES (ICSET), VOLS 1 AND 2, P945, DOI 10.1109/ICSET.2008.4747143  
Ferrari F., 2011, IPSN, P73  
Lynch J. P., 2004, 4 INT WORKSH STRUCT  
Magno M., 2008, 11TH EUROMICRO CONFERENCE ON DIGITAL SYSTEM DESIGN -  
ARCHITECTURES, METHODS AND TOOLS : DSD 2008, PROCEEDINGS, P512, DOI  
10.1109/DSD.2008.23  
Neri A., 2009, ENV EN STRUCT MON SY, P93  
Porcarelli D., 2013, ADV SENS INT IWASI 2, P200  
Porcarelli D., 2012, POW EL EL DRIV AUT M, P946  
Porcarelli D., 2013, DES AUT TEST EUROPE, P1155  
Weddell A. S., 2013, DES AUT TEST EUR C E, P905, DOI DOI 10.7873/DATE.2013.190  
WISPES, 2009, WISP W24TH SENS NOD  
Zonta D., 2008, INT J ARCHIT HERIT, V2, P200, DOI 10.1080/15583050802063691  
NR 19  
TC 6  
Z9 6  
U1 1  
U2 2  
PU SPRINGER  
PI NEW YORK  
PA 233 SPRING STREET, NEW YORK, NY 10013, UNITED STATES  
SN 1876-1100  
BN 978-3-319-03071-5; 978-3-319-03070-8  
J9 LECT NOTES ELECTR EN  
PY 2014  
VL 281  
BP 253  
EP 261  
DI 10.1007/978-3-319-03071-5\_25  
PG 9  
WC Computer Science, Information Systems; Engineering, Electrical &  
Electronic; Telecommunications  
SC Computer Science; Engineering; Telecommunications  
GA BB7CD  
UT WOS:000345330600025  
DA 2018-05-03  
ER  
PT J

AU Hall, N  
 Romanach, L  
 Cook, S  
 Meikle, S

AF Hall, Nina  
 Romanach, Lygia  
 Cook, Stephanie  
 Meikle, Sarah

TI Increasing Energy-Saving Actions in Low Income Households to Achieve Sustainability

SO SUSTAINABILITY

LA English

DT Article

DE energy consumption; behaviour change; low-income; Australia; bridge sustainability

ID CONSERVATION; BEHAVIOR

AB Residential energy consumption contributes up to one-fifth of total greenhouse gas emissions in Australia. Low-income households could benefit from energy efficiency behaviour change programs with anticipated "bridge sustainability" outcomes of environmental and financial benefits and increased well-being, but participation rates from this demographic are often low. The EnergySavers energy behaviour change program was designed for Australian low-income households. A variety of information materials were delivered in structured discussions over a five month period in 2012, with 139 low-income participants in two Australian cities in different climate zones. This article identifies which energy-saving actions low income households are already undertaking and, after completing the program, which actions were most commonly adopted. Participants reported that their participation in the program increased their energy-saving actions, increased their control over energy consumption, and that they disseminated their new knowledge through their social networks. Findings identified the importance of group discussion within demographic groups for information uptake and adoption of new energy behaviours. The housing situation, home population and language background were found to have a significant influence on the uptake of new behaviours. The results also suggest that the program would benefit from amendments to the actions and assessment prior to national roll-out to ensure that effective and long term bridge sustainability can be achieved.

C1 [Hall, Nina; Romanach, Lygia; Cook, Stephanie; Meikle, Sarah] CSIRO, Pullenvale, Qld 4069, Australia.

RP Hall, N (reprint author), CSIRO, 1 Technol Ct, Pullenvale, Qld 4069, Australia.

EM Nina.hall@csiro.au; Lygia.romanach@csiro.au; steffi.cook@gmail.com;

Sarah.meikle@csiro.au

RI Romanach, Lygia/K-1135-2015; Hall, Nina/D-3706-2012

OI Romanach, Lygia/0000-0003-4437-2124; Hall, Nina/0000-0002-5410-6332;

Cook, Stephanie/0000-0002-0053-7276

CR Abrahamse W, 2005, J ENVIRON PSYCHOL, V25, P273, DOI 10.1016/j.jenvp.2005.08.002

Australian Bureau of Statistics, 2013, 4125 0 GEND IND AUST

[Anonymous], 2012, AUSTR GOV SEC CLEAN

Cayla JM, 2011, ENERG POLICY, V39, P7874, DOI 10.1016/j.enpol.2011.09.036

Corner A, 2011, GLOBAL ENVIRON CHANG, V21, P1005, DOI 10.1016/j.gloenvcha.2011.05.002

COSTANZO M, 1986, AM PSYCHOL, V41, P521, DOI 10.1037/0003-066X.41.5.521

Dietz T, 2009, P NATL ACAD SCI USA, V106, P18452, DOI 10.1073/pnas.0908738106

Jubb I., 2010, MAN CLIM CHANG GREEN

Gardner J., 3 CAF

Gynther L, 2012, ENERG EFFIC, V5, P67, DOI 10.1007/s12053-011-9115-9

Lave J., 1991, SITUATED LEARNING LE, DOI [10.2307/2804509, DOI 10.2307/2804509]

McKenzie-Mohr D., 2011, FOSTERING SUSTAINABL

McMakin AH, 2002, ENVIRON BEHAV, V34, P848, DOI 10.1177/001391602237252

Moloney S, 2010, ENERG POLICY, V38, P7614, DOI 10.1016/j.enpol.2009.06.058

Niemeyer S, 2010, INT J CONSUM STUD, V34, P140, DOI 10.1111/j.1470-6431.2009.00841.x

Roberts S, 2008, ENERG POLICY, V36, P4471, DOI 10.1016/j.enpol.2008.09.025

Romanach L., 2013, EP133598 CSIRO

Russo R., 2003, STAT BEHAV SCI INTRO

Simshauser P., 2011, ELECT J, V24, P63, DOI DOI 10.1016/j.TEJ.2011.01.017

- Steg L, 2005, J ENVIRON PSYCHOL, V25, P415, DOI 10.1016/j.jenvp.2005.08.003  
 Steg L, 2009, J ENVIRON PSYCHOL, V29, P309, DOI 10.1016/j.jenvp.2008.10.004  
 Steg L, 2008, ENERG POLICY, V36, P4449, DOI 10.1016/j.enpol.2008.09.027  
 Stern P. C., 1984, ENERGY USE HUMAN DIM  
 Sutterlin B, 2011, ENERG POLICY, V39, P8137, DOI 10.1016/j.enpol.2011.10.008  
 Vallance S., 2011, GEOFORUM, V42, P342, DOI DOI 10.1016/J. GEOFORUM. 2011.01.002  
 Van Hoven B, 2003, J GEOGR HIGHER EDUC, V27, P113, DOI 10.1080/03098260120084403522  
 Verplanken B., 2011, ENGAGING PUBLIC CLIM, P17  
 Wada K, 2012, ENERGY, V48, P5, DOI 10.1016/j.energy.2012.01.046  
 Wright J., 2009, CSIRO HOME ENERGY SA  
 Yohanis Y.G., 2011, ENERG POLICY, V41, P654  
 Yu Z, 2011, ENERG BUILDINGS, V43, P1409, DOI 10.1016/j.enbuild.2011.02.002

NR 31

TC 6

Z9 6

U1 2

U2 39

PU MDPI AG

PI BASEL

PA POSTFACH, CH-4005 BASEL, SWITZERLAND

SN 2071-1050

J9 SUSTAINABILITY-BASEL

JI Sustainability

PD NOV

PY 2013

VL 5

IS 11

BP 4561

EP 4577

DI 10.3390/su5114561

PG 17

WC GREEN & SUSTAINABLE SCIENCE & TECHNOLOGY; Environmental Sciences;  
 Environmental Studies

SC Science & Technology - Other Topics; Environmental Sciences & Ecology

GA 276ZY

UT WOS:000328789400003

OA gold

DA 2018-05-03

ER

PT J

AU Gokce, HU

Gokce, KU

AF Goekce, Hasan Ufuk

Goekce, Kamil Umut

TI Holistic system architecture for energy efficient building operation

SO SUSTAINABLE CITIES AND SOCIETY

LA English

DT Article

DE Energy efficient buildings; Integrated and intelligent control; Data  
 Warehouse Technology; BIM

AB Buildings account for almost 40% of the total energy usage and 30% of the total CO<sub>2</sub> emissions in Europe. Environmental, legislative and economical drivers require more efficient and accurate energy management of buildings. Current building management systems do not have the capabilities of energy specific monitoring and management. In order to address these issues, in this paper, the Holistic Multi-Dimensional Information Management System will be described with its components: Data Warehouse Core, Extraction, Transformation and Loading (ETL) tool and Information Representation tools. The purpose of the developed system is to store, integrate, analyse complex data sets from multiple data and

information sources such as wired/wireless sensing devices (e.g. sensor and meter readings) and Building Information Modelling (BIM) Tools (e.g. Autodesk Revit Architecture and MEP). The developed system is demonstrated and validated in the Environmental Research Institute (ERI) Building located on the campus of National University of Ireland-University College Cork. (C) 2012 Elsevier B.V. All rights reserved.

C1 [Goekce, Hasan Ufuk; Goekce, Kamil Umut] Tech Univ Dresden, Inst Bauinformat, D-01062 Dresden, Germany.

RP Gokce, HU (reprint author), Tech Univ Dresden, Inst Bauinformat, D-01062 Dresden, Germany.  
EM ufuk.gokce@eos-energy-solutions.de; umut.gokce@eos-energy-solutions.de

CR Asim M., 2008, P INT WIR COMM MOB C  
Autodesk, 2012, REV ARCH  
Caldas R. B., 2005, P 10 IEEE C INT EM T  
Chen SZ, 2012, PROCEDIA ENGINEER, V29, P1994, DOI 10.1016/j.proeng.2012.01.250  
Cylon, 2012, CYL CONTR SMART EN C  
DIN-German Institute of Standards, 2007, 15232 DIN EN  
EC - European Commission, 2007, NEW EU EN PLAN MOR S  
EC - European Commission, 2009, ENV CLIM CHANG EM TR  
Familiar MS, 2012, COMPUT NETW, V56, P1303, DOI 10.1016/j.comnet.2011.12.005  
Fischer M., 2008, P 7 INT C MOB BUS  
Gokce H. U., 2011, P 11 INT C CONSTR AP  
Gokce H. U., 2009, P 26 W78 C INF TECHN, P287  
Gokce H.U., 2010, THESIS  
Gokce H. U., 2012, P 14 INT C COMP CIV  
Gokce K. U., 2012, P 14 INT C COMP CIV  
\*IEA, 2008, CO2 EM FUEL COMB  
Itard L., 2008, BUILDING RENOVATION  
Jagemar L., 2007, EIE06038S12448300  
Jingyu L., 2006, P IEEE INT C INF ACQ  
Kimball R, 2008, DATA WAREHOUSE LIFEC  
Klues K., 2007, P 21 ACM SIGOPS S OP, P251  
Marinilli M., 2006, PROFESSIONAL JAVA US  
Microstation, 2012, BENTLEY MICROSTATION  
Nikolaus K., 2008, PICTURE FUTURE SPRIN  
Piette M. A., 2005, REPORT CALIFORNIA EN  
Ramanathan N., 2005, 2 IEEE WORKSH EMB NE  
Shangwei D., 2006, 2006 IFIP INT C WIR  
VDMA-German Engineering Federation, 2008, EN EFF BUILD, P79  
Wenjie C., 2005, P INT C PAR PROC WOR  
Yaqing L., 2008, P INT C COMP COMM CO  
Yarvis M., 2005, P IEEE INT C COMP CM  
Zhang P., 2008, P 12 INT C COMP SUPP  
Zhao Z., 2005, P IEEE ENG MED BIOL

NR 33  
TC 6  
Z9 6  
U1 0  
U2 4  
PU ELSEVIER SCIENCE BV  
PI AMSTERDAM  
PA PO BOX 211, 1000 AE AMSTERDAM, NETHERLANDS  
SN 2210-6715  
J9 SUSTAIN CITIES SOC  
JI Sust. Cities Soc.  
PD FEB  
PY 2013  
VL 6  
BP 77  
EP 84  
DI 10.1016/j.scs.2012.07.003

PG 8

WC Construction & Building Technology; GREEN & SUSTAINABLE SCIENCE & TECHNOLOGY; Energy & Fuels

SC Construction & Building Technology; Science & Technology - Other Topics; Energy & Fuels

GA V41NY

UT WOS:000209554100011

DA 2018-05-03

ER

PT J

AU Gabriel, M

Watson, P

AF Gabriel, Michelle

Watson, Phillipa

TI From Modern Housing to Sustainable Suburbia: How Occupants and their Dwellings are Adapting to Reduce Home Energy Consumption

SO HOUSING THEORY & SOCIETY

LA English

DT Article

DE Sustainable; Adaptation; Material culture; Technology

AB In this paper, we examine how occupants and their dwellings adapt to reduce home energy consumption.

Our analysis is informed by recent studies which emphasize the materiality of the home, as well as the impact of technological change within the home. Such approaches are important in clarifying the relationship between home design and home practices, as well as understanding processes of change such as sustainable home adaptation. Drawing on people's experiences of installing solar hot water systems, we found that sustainable home adaptation was not a straightforward process whereby occupant aspirations were delivered through building adaptation, but rather adaptation arose from the differing capacities and practices of occupants and their buildings, and how these were negotiated over time. In particular, we found that successful adaptations were dependent on the integration of the occupant's "folk knowledge" of their home along with the "technical knowledge" provided by tradespeople, suppliers or the occupant themselves. In contrast to mid-century Australian housing new sustainable modes of living demand: working knowledge of the dwelling, reflection on home practices, and case-specific adjustments of dwellings that reflect the needs and capacities of occupants.

C1 [Gabriel, Michelle; Watson, Phillipa] Univ Tasmania, Sch Sociol & Social Work, Housing & Community Res Unit, Hobart, Tas 7001, Australia.

RP Gabriel, M (reprint author), Univ Tasmania, Sch Sociol & Social Work, Housing & Community Res Unit, Private Bag 17, Hobart, Tas 7001, Australia.

EM michelle.gabriel@utas.edu.au

FU Department of Infrastructure, Energy and Resources, Tasmanian Government

FX The research on which this article is based was supported by funding from the Department of Infrastructure, Energy and Resources, Tasmanian Government. The authors would like to thank colleagues at the University of Tasmania, staff at Sustainable Living Tasmania, and participants of the Housing Theory Symposium held in Hobart, March 2012 for all their advice and assistance. The authors would also like to thank two anonymous reviewers for their insightful comments on drafts of this article. Finally, the authors sincerely thank the research participants who were so generous in providing us with their thoughtful reflections and their valued time.

CR Australian Building Codes Board, 2008, HIST BUILD COD AUSTR

Baker S., 2005, SUSTAINABLE DEV

Bhatti M., 2003, HOUSING STUDIES, V1, P501

Brand S., 1994, BUILDINGS LEARN WHAT

Law J., 1986, POWER ACTION BELIEF, V32, P196, DOI DOI 10.1111/J.1467-954X.1984.TB00113.X

Callon M., 1998, LAWS MARKETS, P1, DOI DOI 10.1080/17530350.2010.494119

Edwards B., 2000, SUSTAINABLE HOUSING

Gabriel M., 2008, HOUSING STUD, V23, P527, DOI 10.1080/02673030802101666



Goldie J, 2005, SEARCH SUSTAINABILIT  
 Gram-Hanssen K, 2011, J CONSUM CULT, V11, P61, DOI 10.1177/1469540510391725  
 Greig A, 1997, HOUSING STUD, V12, P321, DOI 10.1080/02673039708720899  
 Hand M, 2004, HOME CULT, V1, P1  
 Hand M, 2007, ENVIRON PLANN D, V25, P668, DOI 10.1068/d413t  
 Hicks Dan, 2010, OXFORD HDB MAT CULTU  
 Hicks D, 2010, OXFORD HDB MAT CULTU, P25  
 Ingram J, 2007, DES ISSUES, V23, P3, DOI 10.1162/desi.2007.23.2.3  
 Jelsma J., 1999, 4S ANN C SAN DIEG OC  
 Jenks M., 2006, FUTURE FORMS DESIGN  
 Jones A. M, 2010, OXFORD HDB MAT CULTU, P333, DOI DOI  
 10.1093/0XF0RDHB/9780199218714.013.0014  
 Latour Bruno, 1993, WE HAVE NEVER BEEN M  
 LATOUR B, 1988, SOC PROBL, V35, P298, DOI DOI 10.2307/800624  
 Latour B., 2005, REASSEMBLING SOCIAL  
 Law John, 2010, OXFORD HDB MAT CULTU, P173  
 MacKenzie D., 1999, SOCIAL SHAPING TECHN  
 Maller C, 2011, HOUSING THEORY SOC, V29, P255, DOI DOI 10.1080/14036096.2011.606332  
 Maller CJ, 2011, URBAN POLICY RES, V29, P59, DOI 10.1080/08111146.2011.539514  
 Miller D., 2001, HOME POSSESSIONS MAT  
 Miller D, 2005, MATERIALITY  
 Nansen B, 2011, ENVIRON PLANN D, V29, P693, DOI 10.1068/d11709  
 Pels D, 2002, THEOR CULT SOC, V19, P1, DOI 10.1177/026327602761899110  
 Pickering Andrew, 1995, MANGLE PRACTICE TIME  
 Rowe Peter, 1993, MODERNITY HOUSING  
 Rybczynski W., 1986, HOME SHORT HIST IDEA  
 Shove E, 2010, COMFORT LOWER CARBON  
 Shove E, 2007, DESIGN EVERYDAY LIFE  
 Shove E, 2003, COMFORT CLEANLINESS  
 Shove E., 2012, DYNAMICS SOCIAL PRAC  
 Smith SJ, 2004, URBAN GEOGR, V25, P89, DOI 10.2747/0272-3638.25.2.89

NR 38

TC 6

Z9 6

U1 0

U2 3

PU ROUTLEDGE JOURNALS, TAYLOR & FRANCIS LTD

PI ABINGDON

PA 4 PARK SQUARE, MILTON PARK, ABINGDON OX14 4RN, OXFORDSHIRE, ENGLAND

SN 1403-6096

EI 1651-2278

J9 HOUS THEORY SOC

JI Hous. Theory Soc.

PY 2013

VL 30

IS 3

BP 219

EP 236

DI 10.1080/14036096.2013.775183

PG 18

WC Environmental Studies; Planning & Development; Urban Studies

SC Environmental Sciences & Ecology; Public Administration; Urban Studies

GA AQ7VR

UT WOS:000343027800002

DA 2018-05-03

ER

PT B

AU Ahmadi, SA  
 Shames, I  
 Scotton, F  
 Huang, L  
 Sandberg, H  
 Johansson, KH  
 Wahlberg, B

AF Ahmadi, S. A.  
 Shames, I.  
 Scotton, F.  
 Huang, L.  
 Sandberg, H.  
 Johansson, K. H.  
 Wahlberg, B.

BE Lee, VCS  
 Ong, KL

TI Towards More Efficient Building Energy Management Systems

SO 2012 SEVENTH INTERNATIONAL CONFERENCE ON KNOWLEDGE, INFORMATION AND  
 CREATIVITY SUPPORT SYSTEMS (KICSS 2012)

LA English

DT Proceedings Paper

CT 7th IEEE International Conference on Knowledge, Information and  
 Creativity Support Systems (KICSS)

CY NOV 08-10, 2012

CL Melbourne, AUSTRALIA

SP IEEE, IEEE Comp Soc, IEEE Syst, Man & Cybernet Soc

AB As a first step towards developing efficient building energy management techniques, in this paper, we first study the energy consumption patterns of heating, ventilation and cooling (HVAC) systems across the KTH Royal Institute of Technology campus and we identify some possible areas where energy consumption can be made less wasteful. Later, we describe a test-bed where wireless sensor networks are used to collect data and eventually control the HVAC system in a distributed way. We present some of the data, temperature, humidity, and CO<sub>2</sub> measurements, that are collected by the aforementioned network and compare them with the measurements collected by the legacy sensors already in place. In the end we present a preliminary result on modelling the dynamics of the temperature, humidity, and CO<sub>2</sub> using the data gather by the sensor network. We check the validity of the model via comparing the out put of the system with measured data. As a future work we identify the possibility of using the models obtained here for model based control, and fault detection and isolation techniques.

C1 [Ahmadi, S. A.; Shames, I.; Scotton, F.; Huang, L.; Sandberg, H.; Johansson, K. H.; Wahlberg, B.] Royal Inst Technol, ACCESS Linnaeus Ctr, Stockholm, Sweden.

RP Ahmadi, SA (reprint author), Royal Inst Technol, ACCESS Linnaeus Ctr, Stockholm, Sweden.

RI Shames, Iman/G-6565-2016

OI Shames, Iman/0000-0001-7308-3546; Wahlberg, Bo/0000-0002-1927-1690;  
 Johansson, Karl H./0000-0001-9940-5929

CR [Anonymous], 2010, EN CONS UK DOM DAT T  
 [Anonymous], 2010, DIG UK EN STAT  
 Fisk WJ, 2008, PILOT STUDY ACCURACY  
 Fisk W. J., 2010, CO<sub>2</sub> MONITORING DEMAN  
 Gyalistras D., 2010, 10 REHVA WORLD C CLI, P9  
 Hoyt T., 2009, ENERGY SAVINGS EXTEN  
 Ljung L., 1988, MATLAB USERS GUIDE  
 [Anonymous], 2007, MON EN EFF EU 27 NOR  
 [Anonymous], BUILD CAN PLAY KEY R  
 US Department of Energy, BUILD EN DAT BOOK  
 Zimmermann JP, 2009, CONTRACT, V17, P5  
 [Anonymous], 2011, ENERGY POLICY, V39, P5182

NR 12

TC 6

Z9 6

U1 1  
U2 4  
PU IEEE  
PI NEW YORK  
PA 345 E 47TH ST, NEW YORK, NY 10017 USA  
BN 978-0-7695-4861-6  
PY 2012  
BP 118  
EP 125  
DI 10.1109/KICSS.2012.21  
PG 8  
WC Computer Science, Information Systems; Engineering, Electrical &  
Electronic  
SC Computer Science; Engineering  
GA BFP45  
UT WOS:000320869400018  
DA 2018-05-03  
ER

PT J

AU Ma, HR  
Riera-Palou, X  
Harrison, A

AF Ma, Hongrui  
Riera-Palou, Xavier  
Harrison, Andrew

TI Development of a new tank-to-wheels methodology for energy use and green  
house gas emissions analysis based on vehicle fleet modeling

SO INTERNATIONAL JOURNAL OF LIFE CYCLE ASSESSMENT

LA English

DT Article

DE Fleet; Methodology; Modeling; Tank-to-Wheels; Transport statistics;  
Vehicle; Well-to-Wheels

ID ADVISER

AB Background, aim and scope Tank-to-Wheels (TtW) makes the largest contribution to the total Well-to-Wheels (WtW) energy consumption and greenhouse gas (GHG) emissions from fossil-derived transportation fuels. The most commonly adopted TtW methodologies to obtain vehicle energy consumption, energy efficiency, and GHG emissions used to date all have significant limitations. A new TtW methodology, which combines micro-scale virtual vehicle simulation with macro-scale fleet modeling, is proposed in this paper. The models capabilities are demonstrated using a case study based on data from the passenger car sector in Great Britain.

Methods A simplified internal combustion engine model was developed in-house to simulate engine behaviors across a wide range of engine capacities and technologies. Vehicle simulation was then carried out using the efficiency map output by the simplified engine model for any given gasoline or diesel engine; the simulation was validated for 37 vehicles available on the UK market in terms of their vehicle-certification fuel consumption, with a discrepancy generally within 3%. Real-world fleet and driving data from the Great Britain's car fleet was extracted from the Transport Statistics Great Britain (TSGB) database between 2001 and 2007 TSGB 2001-2007. A virtual fleet was constructed with the validated virtual vehicles to represent the real-world passenger car fleet in terms of its composition and operating characteristics. This fleet model was shown to match the real-world fleet-averaged fuel consumption within 3% for the gasoline fleet and within 6% for the diesel fleet. Finally, several scenarios were analyzed using the validated fleet model, covering a projection for 2008, driving pattern, lubrication, and fuel. The vehicle-to-vehicle variation was found to be significant in some scenarios, indicating that a fleet-based methodology would be more rigorous and flexible.

Discussion Energy consumption and CO<sub>2</sub> emission figures from previous, well-recognized Europe-oriented studies (e.g., the 2008 JRC/EUCAR/CONCAWE study) were significantly lower than the TSGB real-world results based on the new TtW methodology. It is apparent that using a single vehicle to represent the whole fleet could be misleading; in particular, the relative energy efficiency and CO<sub>2</sub>

emission of diesel over gasoline cars might follow a different trend with time for the real-world fleet from that shown in previous studies.

Conclusions Future WtW studies can benefit from the modeling toolset and methodology reported herein in a number of ways:

TtW analysis can be carried out

thoroughly-on a fleet basis

independently-involving less proprietary information

impartially-not concentrating on a specific vehicle model

and flexibly-allowing detailed analysis of physics, chemistry, and vehicle component performance.

When comparing different WtW energy pathways, e.g., gasoline vs. diesel passenger cars or natural gas vs. bio-diesel fuelled busses, the absolute aggregate fleet impact can be investigated-conclusions based on a single vehicle may overlook vehicle-to-vehicle variations and potentially mislead policy making.

Using the virtual fleet database as a platform, a large number of scenarios can be analyzed and detailed impact of fuels properties, vehicle technologies and driving patterns on WtW results investigated. The models will evolve in time together with the researchers' knowledge base and data base.

Recommendations and perspectives The virtual engine/vehicle/fleet model developed in this work can readily be expanded and upgraded in the future, in terms of model details, coverage, and data quality. The methodology itself is generically applicable to any defined fleet (passenger cars, commercial vehicles, etc.) with any operating characteristics at any given timeframe from any geographic region. Various subjects and their implications for fleet energy consumption and GHG emissions could be studied including, but not restricted to, the following:

Fuels-injector/valve cleanliness, anti-knock properties, dieselization, bio-components, gaseous fuels etc.

Engine/vehicle technology-friction and weight reduction, advanced combustion, hybridization etc.

Driving pattern-vehicle loading, gear-shifting schedule, tire maintenance, cold start, etc.

C1 [Ma, Hongrui; Riera-Palou, Xavier; Harrison, Andrew] Shell Global Solut UK, Shell Technol Ctr Thornton, Chester CH1 3SH, Cheshire, England.

RP Ma, HR (reprint author), Shell Global Solut UK, Shell Technol Ctr Thornton, POB 1, Chester CH1 3SH, Cheshire, England.

EM H.Ma@shell.com

CR Argonne National Laboratory, 2009, GREENH GAS REG EM EN

Bandivadekar A., 2008, 200805 LFEE RP MIT

BERR - Department for Business Enterprise and Regulatory Reform, 2008, INV SCOP TRANSP SECT

Delucchi M. A., 2003, UCDITSRR0317

\*DEP TRANSP, 2001, TRANSP STAT GREAT BR

Heywood J. B., 1988, INTERNAL COMBUSTION

[CONCAWE EUCAR JRC], 2008, WELL TO WHEELS AN FU

Markel T, 2002, J POWER SOURCES, V110, P255, DOI 10.1016/S0378-7753(02)00189-1

\*SAE, 2008, AUT ENG INT ONL

SCHWADERLAPP M, 2000, FRICTION REDUCTION E

Wipke KB, 1999, IEEE T VEH TECHNOL, V48, P1751, DOI 10.1109/25.806767

NR 11

TC 6

Z9 6

U1 1

U2 18

PU SPRINGER HEIDELBERG

PI HEIDELBERG

PA TIERGARTENSTRASSE 17, D-69121 HEIDELBERG, GERMANY

SN 0948-3349

EI 1614-7502

J9 INT J LIFE CYCLE ASS

JI Int. J. Life Cycle Assess.

PD MAY

PY 2011

VL 16

IS 4

BP 285

EP 296

DI 10.1007/s11367-011-0268-8

PG 12

WC Engineering, Environmental; Environmental Sciences

SC Engineering; Environmental Sciences & Ecology

GA 750QC

UT WOS:000289562100001

DA 2018-05-03

ER

PT J

AU Dai, XZ

Wu, Y

Di, YQ

Li, QY

AF Dai, Xuezhi

Wu, Yong

Di, Yanqiang

Li, Qiaoyan

TI Government regulation and associated innovations in building energy-efficiency supervisory systems for large-scale public buildings in a market economy

SO ENERGY POLICY

LA English

DT Article

DE Energy efficiency supervision; Government regulation; Common benefit community

AB The supervision of energy efficiency in government office buildings and large-scale public buildings is the main embodiment for government implementation of Public Administration in the fields of resource saving and environmental protection. Aimed at improving the current situation of lack of government administration in building energy efficiency, this paper proposes the concept of "change and redesign of governmental supervision in building energy efficiency", repositioning the role of government supervision. Based on this theory and other related theories in regulation economic and modern management, this paper analyzes and researches the action and function of all level governments in execution of the supervisory system of building energy efficiency in government office buildings and large-scale public buildings. This paper also defines the importance of government supervision in energy-efficiency system. Finally, this paper analyzes and researches the interaction mechanism between government and owners of different type buildings, government and energy-efficiency service institution with gambling as main features. This paper also presents some measurements to achieve a common benefit Community in implementation of building energy-efficiency supervisory system. (C) 2009 Elsevier Ltd. All rights reserved.

C1 [Dai, Xuezhi] China Acad Bldg Res, Div Sci & Technol, Beijing 100013, Peoples R China.

[Wu, Yong] Minist Housing & Urban Rural Dev Peoples Republ C, Beijing 100835, Peoples R China.

[Li, Qiaoyan] Natl Univ Singapore, Dept Bldg, Sch Design & Environm, Singapore 117548, Singapore.

RP Dai, XZ (reprint author), China Acad Bldg Res, Div Sci & Technol, 30 Bei San Huan Dong Lu, Beijing 100013, Peoples R China.

EM daixz9999@126.com

CR BROWN CV, 2000, EC PUBLIC SECTOR

JIANG Y, 2006, P 2 GREEN BUILD BUIL

Pindyck Robert S., 2006, MICROECONOMICS

Spulber D., 1999, REGULATION MARKET

WU Y, 2002, ENERGY EFFICIENCY, V38

ZHANG HF, 2005, EC PERSPECTIVE, V8, P72

ZHANG WY, 1996, GRAMBLING INFORM EC

ZHI CY, 1992, MICROREGULATORY EC

NR 8

TC 6

Z9 7

U1 1

U2 11  
 PU ELSEVIER SCI LTD  
 PI OXFORD  
 PA THE BOULEVARD, LANGFORD LANE, KIDLINGTON, OXFORD OX5 1GB, OXON, ENGLAND  
 SN 0301-4215  
 J9 ENERG POLICY  
 JI Energy Policy  
 PD JUN  
 PY 2009  
 VL 37  
 IS 6  
 BP 2073  
 EP 2078  
 DI 10.1016/j.enpol.2009.02.008  
 PG 6  
 WC Economics; Energy & Fuels; Environmental Sciences; Environmental Studies  
 SC Business & Economics; Energy & Fuels; Environmental Sciences & Ecology  
 GA 448AK  
 UT WOS:000266233300005  
 DA 2018-05-03  
 ER

PT J  
 AU Durrenberger, G  
     Patzel, N  
     Hartmann, C  
 AF Durrenberger, G  
     Patzel, N  
     Hartmann, C  
 TI Household energy consumption in Switzerland  
 SO INTERNATIONAL JOURNAL OF ENVIRONMENT AND POLLUTION  
 LA English  
 DT Article; Proceedings Paper  
 CT 2nd International Symposium on Energy Consumption and its Environmental  
     Impact  
 CY JUN, 1999  
 CL PATERWOLDE, NETHERLANDS  
 DE energy; household; lifestyles; material flux analysis; modelling;  
     technological change  
 AB Households consume more energy embodied in goods and services than they consume with energy  
     carriers. Thus, energy assessments need to address both direct consumption and indirect consumption via  
     commodities. This paper first presents a conceptual framework for describing and analysing the direct and  
     indirect energy use of households. The framework is based on material flux analysis and differentiates  
     between four household activities: feeding, housing, transporting and consuming. Secondly, Swiss data on  
     household energy consumption are presented and discussed in the context of household size, technology  
     and consumption behaviour. It is shown that these factors considerably shape per capita energy demand.  
     The third part presents energy projections based on trend assumptions for demographic and technological  
     developments for the next 30 years. When zero growth per capita in commodities consumption is  
     assumed, overall energy demand will increase by about 5%, mainly due to strong increases in gasoline  
     demand. When the growth rate of commodities consumption exceeds 0.3% per year, embodied energy  
     demand will offset efficiency gains achieved by technological improvements in the economic and domestic  
     sectors and will fuel overall energy growth.  
 C1 Swiss Fed Inst Environm Sci & Technol, CH-8600 Dubendorf, Switzerland.  
 RP Durrenberger, G (reprint author), Swiss Fed Inst Environm Sci & Technol, Postfach 611, Uberlandstr 133,  
     CH-8600 Dubendorf, Switzerland.  
 CR Baccini P., 1996, REGIONALER STOFFHAUS  
     \*BFE, 1996, PERSP EN  
     \*BFS, 1996, BEV GES WAND

BIEDERMANN A, 1992, PERSONLICHE ENERGIE  
 ECKERLE K, 1996, ENERGIEPERSPEKTIVEN  
 FAIST M, 1999, P 2 INT S SUST HOUS, P37  
 KASSER U, 1999, OKOLOGISCHE BEWERTUN  
 Maibach M., 1995, OKOINVENTAR TRANSPOR  
 MUTZNER J, 1997, B VSE, P3  
 Noorman K, 1998, GREEN HOUSEHOLDS DOM  
 ROTH C, 1998, SPUREN GRAUEN ENERGI  
 SCHLUMPF C, 1999, ENVIRON MODEL ASSESS, P1  
 WEBER C, 1995, LEBENSSTANDARD LEBEN, P15

NR 13

TC 6

Z9 7

U1 1

U2 5

PU INDERSCIENCE ENTERPRISES LTD

PI GENEVA AEROPORT

PA WORLD TRADE CENTER BLDG 110 AVE LOUIS CASAI CP 306, CH-1215 GENEVA  
 AEROPORT, SWITZERLAND

SN 0957-4352

J9 INT J ENVIRON POLLUT

JI Int. J. Environ. Pollut.

PY 2001

VL 15

IS 2

BP 159

EP 170

DI 10.1504/IJEP.2001.000599

PG 12

WC Environmental Sciences

SC Environmental Sciences & Ecology

GA 394ZR

UT WOS:000166554700004

DA 2018-05-03

ER

PT J

AU Yoshino, H

Hong, TZ

Nord, N

AF Yoshino, Hiroshi

Hong, Tianzhen

Nord, Natasa

TI IEA EBC annex 53: Total energy use in buildings Analysis and evaluation  
 methods

SO ENERGY AND BUILDINGS

LA English

DT Article

DE Real energy use; Occupant behavior; Energy modeling; Performance  
 evaluation; Energy data definition; Energy monitoring

ID OCCUPANT BEHAVIOR

AB One of the most significant barriers to achieving deep building energy efficiency is a lack of knowledge about the factors determining energy use. In fact, there is often a significant discrepancy between designed and real energy use in buildings, which is poorly understood but are believed to have more to do with the role of human behavior than building design. Building energy use is mainly influenced by six factors: climate, building envelope, building services and energy systems, building operation and maintenance, occupants' activities and behavior, and indoor environmental quality. In the past, much research focused on the first three factors. However, the next three human-related factors can have an influence as

significant as the first three. Annex 53 employed an interdisciplinary approach, integrating building science, architectural engineering, computer modeling and simulation, and social and behavioral science to develop and apply methods to analyze and evaluate the real energy use in buildings considering the six influencing factors. Outcomes from Annex 53 improved understanding and strengthen knowledge regarding the robust prediction of total energy use in buildings, enabling reliable quantitative assessment of energy-savings measures, policies, and techniques. (C) 2017 Elsevier B.V. All rights reserved.

C1 [Yoshino, Hiroshi] Tohoku Univ, Dept Architecture & Bldg Sci, Sendai, Miyagi 9808579, Japan.  
 [Hong, Tianzhen] Lawrence Berkeley Natl Lab, Bldg Technol & Urban Syst Div, One Cyclotron Rd, Berkeley, CA 94720 USA.  
 [Nord, Natasa] Norwegian Univ Sci & Technol NTNU, Dept Energy & Proc Engn, NO-7491 Trondheim, Norway.

RP Yoshino, H (reprint author), Tohoku Univ, Dept Architecture & Bldg Sci, Sendai, Miyagi 9808579, Japan.  
 EM yoshino@sabine.pin.archi.toholcu.ac.jp; thong@lbl.gov;  
 natasa.nord@ntnu.no

FU Assistant Secretary for Energy Efficiency and Renewable Energy of the United States Department of Energy [DE-ACO205CH11231]

FX LBNL's participation in Annex 53 was supported by the Assistant Secretary for Energy Efficiency and Renewable Energy of the United States Department of Energy under Contract No. DE-ACO205CH11231.

CR Andre P., 2013, ANNEX 53 FINAL REPOR, VVI  
 Cao G., 2013, ANNEX 53 FINAL REPOR, VIV  
 Chen SQ, 2008, ENERGBUILDINGS, V40, P654, DOI 10.1016/j.enbuild.2007.04.022  
 Chen SQ, 2009, ENERGBUILDINGS, V41, P1347, DOI 10.1016/j.enbuild.2009.07.033  
 Corgnati S., 2013, ANNEX 53 FINAL REPOR  
 Corgnati SP, 2013, APPL ENERGBUILDINGS, V102, P983, DOI 10.1016/j.apenergy.2012.06.001  
 Hong TZ, 2017, BUILD ENVIRON, V114, P518, DOI 10.1016/j.buildenv.2016.12.006  
 Hong TZ, 2016, ENERGBUILDINGS, V116, P694, DOI 10.1016/j.enbuild.2015.11.052  
 ISO, 2013, 12655 ISO  
 [Anonymous], 2013, 16346 ISO  
 Jiang Y., 2013, ANNEX 53 FINAL REPOR, VIII  
 Levine M., 2013, ANNEX 53 FINAL REPOR, VI  
 Polinder H., 2013, ANNEX 53 FINAL REPOR, VII  
 Scofield JH, 2009, ENERGBUILDINGS, V41, P1386, DOI 10.1016/j.enbuild.2009.08.006  
 Yan D, 2015, ENERGBUILDINGS, V107, P264, DOI 10.1016/j.enbuild.2015.08.032  
 Yoshino H., 2013, ANNEX 53 FINAL REPOR

NR 16  
 TC 5  
 Z9 5  
 U1 2  
 U2 4  
 PU ELSEVIER SCIENCE SA  
 PI LAUSANNE  
 PA PO BOX 564, 1001 LAUSANNE, SWITZERLAND  
 SN 0378-7788  
 EI 1872-6178  
 J9 ENERGBUILDINGS  
 JI Energy Build.  
 PD OCT 1  
 PY 2017  
 VL 152  
 BP 124  
 EP 136  
 DI 10.1016/j.enbuild.2017.07.038  
 PG 13  
 WC Construction & Building Technology; Energy & Fuels; Engineering, Civil  
 SC Construction & Building Technology; Energy & Fuels; Engineering  
 GA FH9PV  
 UT WOS:000411545100013



DA 2018-05-03  
ER

PT J

AU Hu, S  
Yan, D  
Guo, SY  
Cui, Y  
Dong, B

AF Hu, Shan  
Yan, Da  
Guo, Siyue  
Cui, Ying  
Dong, Bing

TI A survey on energy consumption and energy usage behavior of households and residential building in urban China

SO ENERGY AND BUILDINGS

LA English

DT Article

DE China urbanization; Residential building; Household energy consumption; Energy use behavior; Questionnaire survey; International comparison

ID PERFORMANCE

AB Building performance, equipment efficiency, and occupant behavior play important roles in China urban residential building energy conservation. An online survey was conducted in 2015 to study the urban residential energy and usage behavior. A total of 4964 Chinese urban households participated in the survey, answering questions about their family composition, buildings, energy use and conservation behaviors, and reactions to specific energy conservation policies. The results suggest that the general trend in Chinese urban households is larger unit sizes (on average, 109 m<sup>2</sup> per household) and smaller families. The average electricity consumption of urban residential buildings is 1690 kWh per year per household in 2015 and it continues to grow as home electronics become more widespread and the demand for higher quality of life increases. China urban residential buildings energy use has the following characteristics: steady growth in size and energy consumption of the buildings associated with rapid urbanization, decentralized and individual equipment with diversified energy usage behavior, and relatively low energy consumption level compared to other countries. In addition to the current energy efficiency programs, China should focus on energy consumption and intensities target of building sector, and the key for urban residential building energy efficiency is to retain traditional behaviors and lifestyles, as well as promoting outcome-based energy conservation policies and technology systems to improve indoor environment and comfort. (C) 2017 Elsevier B.V. All rights reserved.

C1 [Hu, Shan; Yan, Da; Guo, Siyue; Cui, Ying; Dong, Bing] Tsinghua Univ, Bldg Energy Res Ctr, Beijing, Peoples R China.

RP Yan, D (reprint author), Univ Texas San Antonio, Dept Mech Engn, One UTSA Circle, San Antonio, TX 78249 USA.

EM hu-s06@mails.tsinghua.edu.cn; yanda@tsinghua.edu.cn;  
guo-cy12@mails.tsinghua.edu.cn; cui-y14@mails.tsinghua.edu.cn

RI Yan, Da/M-8147-2017

FU Natural Science Foundation of China [51521005]; China Ministry of Housing and Urban-Rural Development; Ministry of Science & Technology, under U.S.-China Clean Energy Research Center for Building Energy Efficiency [2016YFE0102300-05]

FX This study was supported by Natural Science Foundation of China (No. 51521005), it was also supported by the China Ministry of Housing and Urban-Rural Development and the Ministry of Science & Technology, under the U.S.-China Clean Energy Research Center for Building Energy Efficiency (grant no. 2016YFE0102300-05).

CR Belessiotis V, 2002, SOL ENERGY, V72, P307, DOI 10.1016/S0038-092X(02)00011-7  
Building Energy Research Center of Tsinghua University, 2013, ANN REP CHIN BUILD E  
China N Bureau of Statistics, 2015, CHIN STAT YB 2015  
China State Council, 2013, 12 5 YEAR EN DEV PLA

China State Council, 2014, NAT EN DEV STRAT ACT  
 Fabi V., 2013, P 13 IBPSA INT C CHA, P1999  
 Guo SY, 2015, BUILD ENVIRON, V94, P532, DOI 10.1016/j.buildenv.2015.10.004  
 Hazlett R., 2008, ADV PLAY EXP, V53, P187  
 Hu S., 2013, ENERGY CONSUMPTION C  
 Hu S, 2016, ENERG POLICY, V92, P158, DOI 10.1016/j.enpol.2016.01.032  
 I.E. Agency, 2015, EN TECHN PERSP 2015  
 International Energy Agency (IEA) T, BUILD EN US CHIN TRA  
 Jiang JH, 2016, ENERGY, V109, P866, DOI 10.1016/j.energy.2016.05.060  
 Li Z., 2007, STUDY LIFE CYCLE ENE  
 Ling H., 2010, CHINA POPUL RESOUR E, V20, P39  
 National Bureau of Statistics of China, 2013, CHIN STAT YB 2013  
 National Development and Reform Commission C, 2011, CHIN ROADM BAN INC L  
 National Development and Reform Commission, 2004, CHIN MED LONG TERM E  
 National Development and Reform Commission C, 2011, GUID MULT EL PRIC RE  
 National Development and Reform Commission C, 2013, NOT PERF MULT EL PRI  
 Ouyang JL, 2010, ENERGY, V35, P5269, DOI 10.1016/j.energy.2010.07.038  
 Peng C, 2015, ENERG BUILDINGS, V102, P307, DOI 10.1016/j.enbuild.2015.05.049  
 Perez-Lombard L, 2008, ENERG BUILDINGS, V40, P394, DOI 10.1016/j.enbuild.2007.03.007  
 Research Group on Energy Use Performance of China Urban Residential and the Approaches of Energy Saving, 2010, EN US PERF CHIN URB  
 Tsinghua Building Energy Research Center, 2016, 2016 ANN REP CHIN BU  
 Tsinghua Building Energy Research Center, 2011, ANN REP CHIN BUILD E  
 Xi J., 2015, US CHINA JOINT PRESI  
 Xi J., 2014, US CHINA JOINT ANNOU  
 Yan D, 2015, ENERG BUILDINGS, V107, P264, DOI 10.1016/j.enbuild.2015.08.032  
 Yang X., 2007, BUILD ENERGY EFFIC, V1, P12  
 Zhang S., 2010, FRONT ENERGY POWER E, V4, P2  
 Zheng XY, 2014, ENERG POLICY, V75, P126, DOI 10.1016/j.enpol.2014.07.016  
 Zhou X, 2016, BUILD SIMUL-CHINA, V9, P429, DOI 10.1007/s12273-016-0280-9  
 [Anonymous], 2010, ENERGY USES PERFORMA  
 [Anonymous], 2013, XINHUA  
 NR 35  
 TC 5  
 Z9 5  
 U1 10  
 U2 27  
 PU ELSEVIER SCIENCE SA  
 PI LAUSANNE  
 PA PO BOX 564, 1001 LAUSANNE, SWITZERLAND  
 SN 0378-7788  
 EI 1872-6178  
 J9 ENERG BUILDINGS  
 JI Energy Build.  
 PD AUG 1  
 PY 2017  
 VL 148  
 BP 366  
 EP 378  
 DI 10.1016/j.enbuild.2017.03.064  
 PG 13  
 WC Construction & Building Technology; Energy & Fuels; Engineering, Civil  
 SC Construction & Building Technology; Energy & Fuels; Engineering  
 GA EZ4TI  
 UT WOS:000404705000029  
 DA 2018-05-03  
 ER

PT J

AU Hong, JK

Zhang, XL

Shen, QP

Zhang, WQ

Feng, Y

AF Hong, Jingke

Zhang, Xiaoling

Shen, Qiping

Zhang, Wanqiu

Feng, Yong

TI A multi-regional based hybrid method for assessing life cycle energy use of buildings: A case study

SO JOURNAL OF CLEANER PRODUCTION

LA English

DT Article

DE Multi-regional input-output model; Construction industry; Life cycle energy use; Buildings

ID INPUT-OUTPUT-ANALYSIS; CHINA CONSTRUCTION-INDUSTRY; GREENHOUSE-GAS EMISSION; RESIDENTIAL BUILDINGS; CO2 EMISSIONS; CARBON FOOTPRINT; OFFICE BUILDINGS; WORLD-ECONOMY; CONSUMPTION; TRADE

AB Although sustainable development in the construction industry has attracted much attention, relevant studies on the regional scale analysis of industrial energy performance are still rare in China, especially for Guangdong province, which is currently on the frontier and fast track of national low-carbon development. In response, this study integrates a multi-regional input-output method with field based operational data to quantify the total embodied energy consumption and energy transfers from the construction industry and assess the life cycle energy use of residential and office buildings in Guangdong Province. The results show that the embodied energy consumption of the provincial construction industry is localization dominant and fossil fuel oriented, which accounts for approximately 18.6% of the total regional energy consumption. The geographical connection and resource characteristic are the two factors that influence the interregional energy transmissions induced by construction activities in Guangdong province. The result of uncertainty analysis indicates that the mean value of energy intensities simulated by Monte Carlo simulation is highly consistent with the deterministic results. It is crucial to improve the accuracy of the input-output analysis by providing sufficient economic information. At last, a number of recommendations are given through the technology, product, and management aspects at the industrial and building levels. The local government and construction department can benefit from implementing such environment-friendly, technology innovative and multi-disciplinary solutions in the full-process management and improvement of energy reduction of buildings. (C) 2017 Elsevier Ltd. All rights reserved.

C1 [Hong, Jingke] Chongqing Univ, Fac Construct Management & Real Estate, Chongqing 400045, Peoples R China.

[Zhang, Xiaoling] City Univ Hong Kong, Dept Publ Policy, Hong Kong, Hong Kong, Peoples R China.

[Shen, Qiping; Feng, Yong] Hong Kong Polytech Univ, Dept Bldg & Real Estate, Hong Kong, Hong Kong, Peoples R China.

[Zhang, Wanqiu] China Dev Bank, Beijing, Peoples R China.

RP Hong, JK (reprint author), Chongqing Univ, Fac Construct Management & Real Estate, Chongqing 400045, Peoples R China.; Zhang, XL (reprint author), City Univ Hong Kong, Dept Publ Policy, Hong Kong, Hong Kong, Peoples R China.

EM hongjingke@gmail.com; xiaoling.zhang@cityu.edu.hk;

geoffrey.shen@polyu.edu.hk; zhangwanqiu@cdb.cn;

11902800r@connect.polyu.hk

RI Hong, Jingke/A-5302-2018

OI Shen, Qiping/0000-0002-3111-2019

FU Research Grants Council of Hong Kong [15276916]

FX The authors wish to express their sincere gratitude to the Research Grants Council of Hong Kong for funding this research project (No. 15276916). Appreciation is also due to all members of the research team for their invaluable contributions.

CR AIA (American Institute of Architects), 2008, SUST POL

ATHENA, 1997, DEM EN AN OFF BUILD  
 Baum M., 2007, GREEN BUILDING RES F  
 Birol F., 2010, WORLD ENERGY OUTLOOK, V1  
 Blengini GA, 2010, INT J LIFE CYCLE ASS, V15, P652, DOI 10.1007/s11367-010-0190-5  
 Blengini GA, 2010, ENERGBUILDINGS, V42, P869, DOI 10.1016/j.enbuild.2009.12.009  
 Blengini GA, 2009, BUILD ENVIRON, V44, P319, DOI 10.1016/j.buildenv.2008.03.007  
 Brunklaus B, 2010, BUILD RES INF, V38, P265, DOI 10.1080/09613211003654871  
 Chen GQ, 2011, ECOL MODEL, V222, P2362, DOI 10.1016/j.ecolmodel.2010.11.024  
 Chen SQ, 2016, ENVIRON SCI TECHNOL, V50, P4731, DOI 10.1021/acs.est.5b06299  
 Chen SQ, 2015, APPL ENERGBUILDINGS, V138, P99, DOI 10.1016/j.apenergy.2014.10.055  
 Chen TY, 2001, ENERGY, V26, P323, DOI 10.1016/S0360-5442(01)00006-8  
 Chen ZM, 2011, ENERGPOLICY, V39, P5920, DOI 10.1016/j.enpol.2011.06.046  
 Chen ZM, 2013, COMMUN NONLINEAR SCI, V18, P1757, DOI 10.1016/j.cnsns.2012.11.004  
 Ding GKC, 2007, BUILD RES INF, V35, P487, DOI 10.1080/09613210601116408  
 Dixit MK, 2012, RENEW SUST ENERGBUILDINGS, V16, P3730, DOI 10.1016/j.rser.2012.03.021  
 Dixit M. K., 2016, CIB WORLD BUILD C 20  
 Fay R, 2000, BUILD RES INF, V28, P31, DOI 10.1080/096132100369073  
 Guo JE, 2012, ENERGPOLICY, V42, P486, DOI 10.1016/j.enpol.2011.12.015  
 Hertwich EG, 2009, ENVIRON SCI TECHNOL, V43, P6414, DOI 10.1021/es803496a  
 Hong JK, 2017, RENEW SUST ENERGBUILDINGS, V73, P85, DOI 10.1016/j.rser.2017.01.021  
 Hong JK, 2016, J CLEAN PROD, V129, P183, DOI 10.1016/j.jclepro.2016.04.085  
 Hong JK, 2016, ENERGPOLICY, V92, P56, DOI 10.1016/j.enpol.2016.01.017  
 Hong JK, 2016, RENEW SUST ENERGBUILDINGS, V53, P1303, DOI 10.1016/j.rser.2015.09.068  
 Ichimura S., 2003, INTERREGIONAL INPUT  
 Junnila S, 2006, J INFRASTRUCT SYST, V12, P10, DOI 10.1061/(ASCE)1076-0342(2006)12:1(10)  
 Konig H, 2012, BUILD RES INF, V40, P558, DOI 10.1080/09613218.2012.702017  
 Kofoworola OF, 2009, ENERGBUILDINGS, V41, P1076, DOI 10.1016/j.enbuild.2009.06.002  
 Kua HW, 2012, ENERGBUILDINGS, V51, P6, DOI 10.1016/j.enbuild.2012.03.027  
 Lenzen M., 2004, ECON SYST RES, V16, P391, DOI DOI 10.1080/0953531042000304272  
 Lenzen M, 2013, ECON SYST RES, V25, P20, DOI 10.1080/09535314.2013.769938  
 Liu Z, 2012, ENERGY, V45, P1059, DOI 10.1016/j.energy.2012.06.007  
 Metz B., 2007, CONTRIBUTION WORKING  
 Mithraratne N, 2004, BUILD ENVIRON, V39, P483, DOI 10.1016/j.buildenv.2003.09.008  
 NBSC, 2013, CHIN STAT YB CONSTR  
 Perez-Lombard L, 2008, ENERGBUILDINGS, V40, P394, DOI 10.1016/j.enbuild.2007.03.007  
 Rossello-Batle B, 2010, ENERGBUILDINGS, V42, P547, DOI 10.1016/j.enbuild.2009.10.024  
 Rossi B, 2012, BUILD ENVIRON, V51, P395, DOI 10.1016/j.buildenv.2011.11.017  
 Salazar J, 2009, J CLEAN PROD, V17, P1563, DOI 10.1016/j.jclepro.2009.06.006  
 Scheuer C, 2003, ENERGBUILDINGS, V35, P1049, DOI 10.1016/S0378-7788(03)00066-5  
 Su B, 2014, APPL ENERGBUILDINGS, V114, P377, DOI 10.1016/j.apenergy.2013.09.036  
 Thormark C, 2000, BUILD RES INF, V28, P176, DOI 10.1080/096132100368948  
 Utama A, 2008, ENERGBUILDINGS, V40, P1911, DOI 10.1016/j.enbuild.2008.04.017  
 Van Ooteghem K, 2012, BUILD ENVIRON, V49, P212, DOI 10.1016/j.buildenv.2011.09.028  
 Verbeeck G, 2010, BUILD ENVIRON, V45, P964, DOI 10.1016/j.buildenv.2009.10.003  
 Wallhagen M, 2011, BUILD ENVIRON, V46, P1863, DOI 10.1016/j.buildenv.2011.02.003  
 Weber CL, 2009, ENERGPOLICY, V37, P1561, DOI 10.1016/j.enpol.2008.12.027  
 Weidema BP, 1996, J CLEAN PROD, V4, P167, DOI DOI 10.1016/S0959-6526(96)00043-1  
 Wu HJJ, 2012, INT J LIFE CYCLE ASS, V17, P105, DOI 10.1007/s11367-011-0342-2  
 Xing S, 2008, ENERGBUILDINGS, V40, P1188, DOI 10.1016/j.enbuild.2007.10.016  
 Bribian IZ, 2009, BUILD ENVIRON, V44, P2510, DOI 10.1016/j.buildenv.2009.05.001  
 Zhang Y, 2007, CHINA MULTIREGIONAL

NR 52

TC 5

Z9 5

U1 8

U2 25

PU ELSEVIER SCI LTD

PI OXFORD

PA THE BOULEVARD, LANGFORD LANE, KIDLINGTON, OXFORD OX5 1GB, OXON, ENGLAND  
 SN 0959-6526  
 EI 1879-1786  
 J9 J CLEAN PROD  
 JI J. Clean Prod.  
 PD APR 1  
 PY 2017  
 VL 148  
 BP 760  
 EP 772  
 DI 10.1016/j.jclepro.2017.02.063  
 PG 13  
 WC GREEN & SUSTAINABLE SCIENCE & TECHNOLOGY; Engineering, Environmental;  
 Environmental Sciences  
 SC Science & Technology - Other Topics; Engineering; Environmental Sciences  
 & Ecology  
 GA EQ9SO  
 UT WOS:000398425700072  
 DA 2018-05-03  
 ER

PT J

AU Traversari, R  
 Den Hoed, M  
 Di Giulio, R  
 Bomhof, F

AF Traversari, Roberto  
 Den Hoed, Martjan  
 Di Giulio, Roberto  
 Bomhof, Freek

TI TOWARDS SUSTAINABILITY THROUGH ENERGY EFFICIENT BUILDINGS' DESIGN:  
 SEMANTIC LABELS

SO ENTREPRENEURSHIP AND SUSTAINABILITY ISSUES

LA English

DT Article

DE sustainability; energy efficiency; BIM; early design; semantic  
 technology; design rules

AB When designing buildings, it is a challenge to take into account Energy Efficiency in the early design stage. This is especially difficult for hospital designs, because these buildings comprise many different room types and functions. This greatly increases the number of design directions available. Choices made early on in the design process have a large impact on the final performance of the building. However, the lack of detailing available in early designs makes it hard to evaluate them in terms of Key Performance Indicators. The Semantic Labels developed as part of the STREAMER project provide a way to address this problem, by allowing structured capture of the most relevant aspects of the Program of Requirements. Using this method, design rules can be applied to early building designs to detect and correct inconsistencies or suboptimal solutions. Also, using default values for label values, an early design can already be evaluated using simulation tools. The Semantic labels describe standard values for Construction (floor height and strength, accessibility), Hygiene class (from public spaces to operational theatres), Equipment (electric power requirements, safety), User profile (when the room is used), Comfort class (like daylight) and Access security (who can enter). Design rules may express conditions like the preferred spatial separation between rooms, or whether rooms should be placed at outer walls, but may also highlight incompatibilities in e.g. access requirements and user profiles. The Early Design Configurator, also under development as part of the STREAMER project, uses the Semantic Labels to allow automatic conversion of a Programme of Requirements, into an initial Building Information Modeling (BIM) design proposal that respects the design rules.

C1 [Traversari, Roberto; Bomhof, Freek] TNO, Van Mourik Broekmanweg 6, Delft, Netherlands.  
 [Den Hoed, Martjan] De Jong Gortemaker Algra Architecten, Rotterdam, Netherlands.  
 [Di Giulio, Roberto] Univ Ferrara, Dept Architecture, Ferrara, Italy.

RP Traversari, R (reprint author), TNO, Van Mourik Broekmanweg 6, Delft, Netherlands.

EM roberto.traversari@tno.nl; martjan.denhoed@djga.nl; dgr@unife.it;

freek.bomhof@tno.nl

OI Bomhof, Freek/0000-0002-1498-6873; Traversari,

Roberto/0000-0001-9116-3849

FU STREAMER project, from the European Union's 7th Framework Programme [608739]

FX This research was supported by the STREAMER project, which has received funding from the European Union's 7th Framework Programme under grant agreement No 608739.

CR Abdirad H., 2015, C COMP CIV ENG P JAN, V2015, P548

Dael O., 2006, J MACHINE LEARNING R, V7, P551

De Hoogh S., 2014, EWORK EBUSINESS ARCH, P907

El-Diraby TA, 2005, J COMPUT CIVIL ENG, V19, P394, DOI 10.1061/(ASCE)0887-3801(2005)19:4(394)

Fottler MD, 2000, J HEALTHC MANAG, V45, P91

Guruz R, 2014, ENTREP SUSTAIN ISS, V2, P60, DOI 10.9770/jesi.2014.2.2(2)

Knopp-Trendafilova A., 2009, VTT S VALT TEKN TUTK, P285

Likhitruangsilp V., 2014, COMP CIV BUILD ENG P, P2224

Maradza E, 2014, P 30 ANN ASS RES CON, P613

[Anonymous], 2007, BUILD DIFF HOSP LAY

Razminiene K, 2016, TERRA ECON, V14, P101, DOI 10.18522/2073-6606-2016-14-3-101-111

Rezk M. A., 2016, ENTREPRENEURSHIP SUS, V3, P306

Simelyte A, 2016, ENTREP SUSTAIN ISS, V3, P319, DOI 10.9770/jesi.2016.3.4(2)

Strielkowski W., 2016, J SECURITY SUSTAINAB, V6, P235

Van Oers B. J., 2011, PACKING APPROACH EAR

Van Ree H., 2006, COBRA 2006 P ANN RES, P13

[Anonymous], 2013, BUILDING COMPONENT S, V61

NR 17

TC 5

Z9 5

U1 7

U2 7

PU ENTERPRENEURSHIP & SUSTAINABILITY CENTER

PI VILNUS

PA M K CIURLIONIO STR 86A, VILNUS, 03100, LITHUANIA

SN 2345-0282

J9 ENTREP SUSTAIN ISS

J1 Entrep. Sustain. Iss.

PD MAR

PY 2017

VL 4

IS 3

BP 243

EP 256

DI 10.9770/jesi.2016.4.3S(1)

PG 14

WC Business

SC Business & Economics

GA EZ7KZ

UT WOS:000404904400001

DA 2018-05-03

ER

PT J

AU Gourlis, G

Kovacic, I

AF Gourlis, Georgios

Kovacic, Iva

TI Building Information Modelling for analysis of energy efficient industrial buildings - A case study

SO RENEWABLE & SUSTAINABLE ENERGY REVIEWS

LA English

DT Article; Proceedings Paper

CT 10th Conference on Sustainable Development of Energy, Water and Environment Systems (SDEWES)

CY SEP 27-OCT 02, 2015

CL Dubrovnik, CROATIA

DE BIM; BEM; Industrial construction; Thermal simulation

ID BIM; SIMULATION; PERFORMANCE; DESIGN; FRAMEWORK

AB Industrial buildings demand higher amount of energy than other building typologies, thus powerful modelling and simulation tools for energy-optimisation and identification of synergies-potentials between the building envelope, building services and production systems are needed.

Building Information Modelling (BIM), as emerging technology, bears promise to support processes integration thus enabling life-cycle management of buildings. BIM model serves as a joint knowledge database where data transfer between various models is possible; thereby enabling follow up studies, such as cost, thermal and structural analysis.

Adoption of BIM to BEM (building energy modelling) approach is particularly interesting for optimisation of industrial facilities. Multiple layers of interacting complex systems (building, services and machine floor layout) require careful modelling and control of geometry in terms of collisions, various adaptations due to the short product-life-cycles, as well as integrated energy performance analysis along interacting systems.

This paper explores the potentials and deficits of the modelling, analysis and optimisation of energy efficient industrial buildings using BIM to BEM methodology, by means of case study research of two industrial facilities. Varying needs concerning the Level of Development and semantic differences in the modelling procedures of part-taking disciplines (architecture, structural engineering or analysis) were identified as problems; as well as time pressure as one of the main reasons for defects of building models. The identified deficits represent various types of uncertainties related to the integrated energy modelling, as BIM to BEM can be referred to. We conclude that as a first step of integrated modelling, an uncertainty-analysis should be carried out, and strategies how to deal with these developed. In order to minimise BIM to BEM uncertainties, not only interoperability issues of the software has to be improved (modelling uncertainty), but moreover, the redefinition of the design process and enhancement of individual capabilities is necessary (process uncertainty). (C) 2016 Elsevier Ltd. All rights reserved.

C1 [Gourlis, Georgios; Kovacic, Iva] Vienna Univ Technol, Fac Civil Engn, Dept Ind Bldg & Interdisciplinary Planning, Karlspl 13-e234-2, A-1040 Vienna, Austria.

RP Kovacic, I (reprint author), Vienna Univ Technol, Fac Civil Engn, Dept Ind Bldg & Interdisciplinary Planning, Karlspl 13-e234-2, A-1040 Vienna, Austria.

EM georgios.gourlis@tuwien.ac.at; iva.kovacic@tuwien.ac.at

OI Gourlis, Georgios/0000-0002-2575-0559

FU Austrian Climate and Energy Funds within the program e!MISSION.at - Energy Mission Austria [840746]

FX The research presented in this article is a part of research project BaMa\_Balance Manufacturing, by the Austrian Climate and Energy Funds within the program e!MISSION.at - Energy Mission Austria, Grant number 840746. We gratefully acknowledge the collaboration of all academic and industrial project-partners.

CR Ahn KU, 2014, ENERGETIC BUILDINGS, V68, P671, DOI 10.1016/j.enbuild.2013.08.063

Anderson Gary, 1993, FUNDAMENTALS ED RES

Aranda-Mena G, 2008, CIBW78 2008 INT C IN

Ascough JC, 2008, ECOL MODEL, V219, P383, DOI 10.1016/j.ecolmodel.2008.07.015

Asl MR, 2015, ENERGY BUILD, V108, P401

Autodesk, PAR BUILD MOD BIMS F

Azhar S, 2011, AUTOMAT CONSTR, V20, P217, DOI 10.1016/j.autcon.2010.09.019

Bahar YN, 2013, BUILDINGS, V3, P380, DOI 10.3390/buildings3020380

Azhar S., 2009, CIB W, V5, P276

Bazjanac V., 2008, IFC BIM BASED METHOD

Bleicher F, 2014, CIRP ANN-MANUF TECHN, V63, P441, DOI 10.1016/j.cirp.2014.03.122

BuildingSMARTalliance United States National, 2007, US NAT BUILD INF MOD

- Cemesova A, 2015, AUTOMAT CONSTR, V57, P17, DOI 10.1016/j.autcon.2015.04.014
- Chandel SS, 2016, RENEW SUST ENERG REV, V54, P13
- Chasey Allan D., 2012, Proceedings of the 2012 Construction Research Congress, P437
- Clarke JA, 2015, BUILD ENVIRON, V91, P294, DOI 10.1016/j.buildenv.2015.04.002
- Dainty A, 2015, P ENG PROJ ORG C U E
- De Boeck L, 2015, RENEW SUST ENERG REV, V52, P960, DOI 10.1016/j.rser.2015.07.037
- de Wilde P, 2014, AUTOMAT CONSTR, V41, P40, DOI 10.1016/j.autcon.2014.02.009
- Dong B, 2007, BUILDING SIMULATION 2007, VOLS 1-3, PROCEEDINGS, P1530
- Eadie R, 2013, AUTOMAT CONSTR, V36, P145, DOI 10.1016/j.autcon.2013.09.001
- Eastman C., 1999, BUILDING PRODUCT MOD
- EISENHARDT KM, 1989, ACAD MANAGE REV, V14, P532, DOI 10.2307/258557
- El Asmi E, 2015, INT J DES SCI TECHNO, V21, P59
- Fischer M, 2003, ITCON, V8, P137
- Fouquier A, 2013, RENEW SUST ENERG REV, V23, P272, DOI 10.1016/j.rser.2013.03.004
- Georgescu M, 2015, ENERG BUILDINGS, V86, P794, DOI 10.1016/j.enbuild.2014.10.046
- Graphisoft, VIRT BUILD CONC
- Ham Y, 2015, AUTOMAT CONSTR, V49, P214, DOI 10.1016/j.autcon.2014.07.009
- Harremoes P, 1999, WATER SCI TECHNOL, V39, P1
- Heravi G, 2015, J CLEAN PROD, V109, P92, DOI 10.1016/j.jclepro.2015.06.133
- McGraw Hill, BUSINESS VALUE BIM G
- Hitchcock R. J., 2011, P BUILD SIM 2011 12, P1089
- Huang RY, 2012, P 14 INT C COMP CIV
- Hyun S, 2015, BUILDING INFORM MODE, P543
- Ibrahim M, 2004, CAADRIA 2004 C SEOUL, P1
- Ionescu C, 2015, RENEW SUST ENERG REV, V49, P243, DOI 10.1016/j.rser.2015.04.062
- [Anonymous], 2013, 16739 ISO
- Jeong W, 2016, J BUILD PERFORM SIMU, V9, P50, DOI 10.1080/19401493.2014.993709
- Kensek K., 2014, BUILDING INFORM MODE
- Kim JB, 2015, AUTOMAT CONSTR, V50, P16, DOI 10.1016/j.autcon.2014.10.011
- Kiviniemi A, 2008, ERABUILD, P1
- Kota S, 2014, ENERG BUILDINGS, V81, P391, DOI 10.1016/j.enbuild.2014.06.043
- Kovacic I, 2013, VIS ENG, V13, P1
- Kovacic I, 2013, STROJARSTVO, V55, P17
- Lee SI, 2012, AUTOMAT CONSTR, V23, P20, DOI 10.1016/j.autcon.2011.12.008
- Li N, 2014, AUTOMAT CONSTR, V42, P78, DOI 10.1016/j.autcon.2014.02.019
- Li XW, 2014, RENEW SUST ENERG REV, V37, P517, DOI 10.1016/j.rser.2014.05.056
- Linderoth HCJ, 2010, AUTOMAT CONSTR, V19, P66, DOI 10.1016/j.autcon.2009.09.003
- Maile T, 2013, BUILD SIM C, P3244
- Mirakyan A, 2015, RENEW SUST ENERG REV, V46, P62, DOI 10.1016/j.rser.2015.02.028
- Moon H.J., 2011, P 12 C INT BUILD PER, P1521
- Morgan MG, 1992, UNCERTAINTY GUIDE DE
- Nasyrov V, 2014, EWORK EBUSINESS ARCH, P479
- O'Donnell JT, 2013, TRANSFORMING BIM BEM
- Penttila H., 2006, ITCON, V11, P395
- Prada-Hernandez A. V., 2015, P SIBRAGEC ELAGEC 20, P519
- Redmond A, 2012, AUTOMAT CONSTR, V24, P175, DOI 10.1016/j.autcon.2012.02.003
- Robert S, 2014, EWORK EBUSINESS ARCH, P149
- Ruparathna R, 2016, RENEW SUST ENERG REV, V53, P1032, DOI 10.1016/j.rser.2015.09.084
- Schlueter A, 2009, AUTOMAT CONSTR, V18, P153, DOI 10.1016/j.autcon.2008.07.003
- Sebastian R, 2010, ARCHIT ENG DES MANAG, V6, P254, DOI 10.3763/aedm.2010.IDDS3
- Smith P, 2014, PROCD SOC BEHV, V119, P475, DOI 10.1016/j.sbspro.2014.03.053
- Steel J, 2012, SOFTW SYST MODEL, V11, P99, DOI 10.1007/s10270-010-0178-4
- Succar B, 2013, AUTOMAT CONSTR, V35, P174, DOI 10.1016/j.autcon.2013.05.016
- Succar B, 2009, AUTOMAT CONSTR, V18, P357, DOI 10.1016/j.autcon.2008.10.003
- von Both P, 2011, PRODUKTDATENMODELLIE
- Wang G, 2013, P 30 CIB W78 INT C B, P565
- Welle B, 2011, BUILD SIMUL-CHINA, V4, P293, DOI 10.1007/s12273-011-0052-5
- Wetzel EM, 2015, AUTOMAT CONSTR, V60, P12, DOI 10.1016/j.autcon.2015.09.004



Wong JKW, 2015, AUTOMAT CONSTR, V57, P156, DOI 10.1016/j.autcon.2015.06.003

Yin R. K., 1994, CASE STUDY RES DESIG

Zhang SJ, 2013, AUTOMAT CONSTR, V29, P183, DOI 10.1016/j.autcon.2012.05.006

NR 73

TC 5

Z9 5

U1 8

U2 53

PU PERGAMON-ELSEVIER SCIENCE LTD

PI OXFORD

PA THE BOULEVARD, LANGFORD LANE, KIDLINGTON, OXFORD OX5 1GB, ENGLAND

SN 1364-0321

J9 RENEW SUST ENERG REV

J1 Renew. Sust. Energ. Rev.

PD FEB

PY 2017

VL 68

BP 953

EP 963

DI 10.1016/j.rser.2016.02.009

PN 2

PG 11

WC GREEN & SUSTAINABLE SCIENCE & TECHNOLOGY; Energy & Fuels

SC Science & Technology - Other Topics; Energy & Fuels

GA EH6QQ

UT WOS:000391899400011

DA 2018-05-03

ER

PT J

AU Liu, HX

Lin, BQ

AF Liu, Hongxun

Lin, Boqiang

TI Energy substitution, efficiency, and the effects of carbon taxation:

Evidence from China's building construction industry

SO JOURNAL OF CLEANER PRODUCTION

LA English

DT Article

DE Energy substitution; Energy efficiency decomposition; Carbon taxation;

Building construction industry; Translog cost function

ID ECONOMIC VIABILITY ANALYSIS; WASTE RECYCLING PLANT; INTERFUEL

SUBSTITUTION; TECHNICAL CHANGE; INTERFACTOR/INTERFUEL SUBSTITUTION; CO2

EMISSIONS; DEMAND; TECHNOLOGY; TAX; TRANSPORT

AB As buildings are constructed to be more energy-efficient and environmental friendly, the building construction industry, which is a basic and leading industry of the national economy development, has become one of the key sectors for energy conservation and emission reduction in China. This paper aims at quantifying both inter-factor and inter-energy substitution for China's building construction industry and investigate the main driving forces behind energy efficiency changes as well as the CO<sub>2</sub> abatement effect of a uniform carbon tax in this sector. The model is established employing provincial pooled data over 2003-2012 in China by regions; hence, results between different regions are compared. The main findings indicate that: (i) energy and non-energy are substitutes whereas individual energy inputs are complementary in China's building construction industry. The substitution effect varies across regions due to different factor endowments and marketization levels. (ii) Energy price increase and construction scale expansion leads to energy efficiency improvement while substitution and technology present negative influences on energy efficiency. (iii) Approximately 3% of the CO<sub>2</sub> emissions in China's building construction industry can be reduced by carbon taxation based on the integrated own-and cross-price elasticities of each energy. (C) 2016 Elsevier Ltd. All rights reserved.

- C1 [Liu, Hongxun] Xi An Jiao Tong Univ, Sch Econ & Finance, Xian 710061, Shaanxi, Peoples R China.  
 [Lin, Boqiang] Xiamen Univ, China Inst Studies Energy Policy, Collaborat Innovat Ctr Energy Econ & Energy Polic, Xiamen 361005, Fujian, Peoples R China.
- RP Lin, BQ (reprint author), Xiamen Univ, China Inst Studies Energy Policy, Collaborat Innovat Ctr Energy Econ & Energy Polic, Xiamen 361005, Fujian, Peoples R China.  
 EM bqlin@xmu.edu.cn  
 RI Lin, Boqiang/G-3960-2010  
 OI Lin, Boqiang/0000-0002-1308-400X  
 FU Grant for Collaborative Innovation Center for Energy Economics and Energy Policy [1260-Z0210011]; Xiamen University Flourish Plan [1260-Y07200]
- FX The paper is supported by the Grant for Collaborative Innovation Center for Energy Economics and Energy Policy (No: 1260-Z0210011), and Xiamen University Flourish Plan Special Funding (No:1260-Y07200).
- CR AGOSTINI P, 1992, *ENERG ECON*, V14, P279, DOI 10.1016/0140-9883(92)90034-B  
 Allen R. G. D., 1938, *MATH ANAL EC*  
 BERNDT ER, 1975, *REV ECON STAT*, V57, P259, DOI 10.2307/1923910  
 Broadstock D., 2007, 3 *UKERC EN RES CTR*  
 Chang YA, 2010, *ENERG POLICY*, V38, P6597, DOI 10.1016/j.enpol.2010.06.030  
 Chen X.L., 2013, *CHINA EC Q*, V11, P93  
 Cho WG, 2004, *ENERG ECON*, V26, P31, DOI 10.1016/j.eneco.2003.04.001  
 CHRISTENSEN LR, 1973, *REV ECON STAT*, V55, P28, DOI 10.2307/1927992  
 Coelho A, 2013, *J CLEAN PROD*, V39, P338, DOI 10.1016/j.jclepro.2012.08.024  
 Coelho A, 2013, *J CLEAN PROD*, V39, P329, DOI 10.1016/j.jclepro.2012.05.006  
 DEBERTIN DL, 1990, *ENERG ECON*, V12, P2, DOI 10.1016/0140-9883(90)90002-W  
 Fazeli R, 2016, *RENEW SUST ENERG REV*, V57, P1210, DOI 10.1016/j.rser.2015.12.184  
 FIELD BC, 1980, *REV ECON STAT*, V62, P207, DOI 10.2307/1924746  
 GRIFFIN JM, 1976, *AM ECON REV*, V66, P845  
 Haan P, 2007, *J CLEAN PROD*, V15, P1076, DOI 10.1016/J.JCLEPR0.2006.05.025  
 Intergovernmental Panel on Climate Change (IPCC), 2006, *IPCC 2006 GUID NAT G*  
 Li AJ, 2013, *ENERG POLICY*, V60, P667, DOI 10.1016/j.enpol.2013.04.041  
 Li JL, 2016, *ENERG ECON*, V56, P483, DOI 10.1016/j.eneco.2016.04.001  
 Liang QM, 2016, *J CLEAN PROD*, V112, P1568, DOI 10.1016/j.jclepro.2015.02.092  
 Lin BQ, 2016, *J CLEAN PROD*, V126, P537, DOI 10.1016/j.jclepro.2016.03.065  
 Lin BQ, 2015, *BUILD ENVIRON*, V94, P239, DOI 10.1016/j.buildenv.2015.08.013  
 Lin BQ, 2014, *ENERG POLICY*, V74, P589, DOI 10.1016/j.enpol.2014.08.031  
 Lin BQ, 2014, *ENERGY*, V76, P884, DOI 10.1016/j.energy.2014.08.089  
 Lin BQ, 2014, *ENERGY*, V67, P213, DOI 10.1016/j.energy.2013.12.045  
 Lin BQ, 2013, *ENERG ECON*, V40, P529, DOI 10.1016/j.eneco.2013.08.013  
 Lin B, 2013, *ENERG ECON*, V40, P560, DOI 10.1016/j.eneco.2013.08.017  
 Lin BQ, 2011, *ENERG POLICY*, V39, P5137, DOI 10.1016/j.enpol.2011.05.050  
 Lin B.Q., 2010, *SOCIAL SCI CHINA*, V2, P91  
 Liu HX, 2016, *ECOL INDIC*, V67, P68, DOI 10.1016/j.ecolind.2016.02.024  
 Liu XB, 2015, *J CLEAN PROD*, V103, P393, DOI 10.1016/j.jclepro.2014.12.084  
 Lu Y, 2011, *EC RES J*, V7, P42  
 Ma HY, 2008, *ENERG ECON*, V30, P2167, DOI 10.1016/j.eneco.2008.01.010  
 PINDYCK RS, 1979, *REV ECON STAT*, V61, P169, DOI 10.2307/1924584  
 Smyth R, 2011, *APPL ENERG*, V88, P361, DOI 10.1016/j.apenergy.2010.07.019  
 Sorrell S, 2014, *ENERGIES*, V7, P2850, DOI 10.3390/en7052850  
 UZAWA H, 1962, *REV ECON STUD*, V29, P291, DOI 10.2307/2296305  
 Varnas A, 2009, *J CLEAN PROD*, V17, P1214, DOI 10.1016/j.jclepro.2009.04.001  
 Wang H, 2012, *ENERG ECON*, V34, P452, DOI 10.1016/j.eneco.2011.09.010  
 Wang J., 2009, *CHINA ENV SCI*, V29, P101  
 Welsch H, 2005, *ENERG ECON*, V27, P93, DOI 10.1016/j.eneco.2004.11.004  
 Wesseh PK, 2013, *RENEW SUST ENERG REV*, V24, P122, DOI 10.1016/j.rser.2013.03.061  
 Zhu Y, 2010, *CHINA SOFT SCI*, V4, P1

NR 42

TC 5

Z9 5  
 U1 15  
 U2 43  
 PU ELSEVIER SCI LTD  
 PI OXFORD  
 PA THE BOULEVARD, LANGFORD LANE, KIDLINGTON, OXFORD OX5 1GB, OXON, ENGLAND  
 SN 0959-6526  
 EI 1879-1786  
 J9 J CLEAN PROD  
 JI J. Clean Prod.  
 PD JAN 10  
 PY 2017  
 VL 141  
 BP 1134  
 EP 1144  
 DI 10.1016/j.jclepro.2016.09.119  
 PG 11  
 WC GREEN & SUSTAINABLE SCIENCE & TECHNOLOGY; Engineering, Environmental;  
 Environmental Sciences  
 SC Science & Technology - Other Topics; Engineering; Environmental Sciences  
 & Ecology  
 GA ED7ZC  
 UT WOS:000389090300104  
 DA 2018-05-03  
 ER

PT J  
 AU Jagger, P  
 Perez-Heydrich, C  
 AF Jagger, Pamela  
 Perez-Heydrich, Carolina  
 TI Land use and household energy dynamics in Malawi  
 SO ENVIRONMENTAL RESEARCH LETTERS  
 LA English  
 DT Article  
 DE biomass; Africa; energy; cookstoves; woodfuels; deforestation; land use  
 change  
 ID COOKSTOVES; POVERTY; MODEL; FUELS

AB Interventions to mitigate household air pollution (HAP) from cooking with solid fuels often fail to take into account the role of access to freely available woodfuels in determining fuel choice and willingness to adopt clean cooking technologies, key factors in mitigating the burden of HAP. We use national-scale remote sensing data on land use land cover change, and population representative data from two waves of the Malawi Living Standards Measurement Survey to explore the relationship between land use change and the type of fuel households use, time spent collecting fuel, and expenditures on fuel, hypothesizing that land use dynamics influence household-level choice of primary cooking fuel. We find considerable heterogeneity with respect to regeneration and deforestation/ degradation dynamics and evidence of spatial clustering. We find that regeneration of forests and woodlands increases the share of households that collect fuelwood, whereas deforestation and degradation lead households to purchase fuelwood. We also find that a relatively large share of land under woody savannah or degraded forest (versus fully stocked forest) increases fuel collection time. Areas with regeneration happening at broader scale experience increases in fuel expenditures. Our findings have implications for the spatial targeting of interventions designed to mitigate HAP.

C1 [Jagger, Pamela] Univ North Carolina Chapel Hill, Dept Publ Policy, 206 West Franklin St, Room 208, Chapel Hill, NC 27516 USA.  
 [Jagger, Pamela] Univ North Carolina Chapel Hill, Carolina Populat Ctr, 206 West Franklin St, Room 208, Chapel Hill, NC 27516 USA.  
 [Perez-Heydrich, Carolina] Meredith Coll, Dept Biol Sci, 3800 Hillsborough St, Raleigh, NC 27607 USA.

RP Jagger, P (reprint author), Univ North Carolina Chapel Hill, Dept Publ Policy, 206 West Franklin St, Room 208, Chapel Hill, NC 27516 USA.; Jagger, P (reprint author), Univ North Carolina Chapel Hill, Carolina Populat Ctr, 206 West Franklin St, Room 208, Chapel Hill, NC 27516 USA.

EM pjagger@unc.edu; cperezheydrich@meredith.edu

FU Eunice Kennedy Shriver National Institute of Child Health and Human Development [K01HD073329]; Fogarty International Center [R25 TW009340]; National Heart, Lung and Blood Institute [R25 TW009340]

FX This research was funded by the Eunice Kennedy Shriver National Institute of Child Health and Human Development (K01HD073329) and the Fogarty International Center and National Heart, Lung and Blood Institute (R25 TW009340). We are grateful to the Carolina Population Center (P2C HD050924) at The University of North Carolina at Chapel Hill for general support. We also wish to thank the National Statistical Office of Malawi for their willingness to share IHS2 and IHS3 data with us. The opinions expressed herein are those of the authors and do not necessarily reflect the views of the sponsoring agency.

CR Ahrends A, 2010, P NATL ACAD SCI USA, V107, P14556, DOI 10.1073/pnas.0914471107  
 ANSELIN L, 1995, GEOGR ANAL, V27, P93, DOI 10.1111/j.1538-4632.1995.tb00338.x  
 Bailis R, 2015, NAT CLIM CHANGE, V5, P266, DOI [10.1038/nclimate2491, 10.1038/NCLIMATE2491]  
 Bandyopadhyay S, 2011, ECOL ECON, V70, P2461, DOI 10.1016/j.ecolecon.2011.08.003  
 Bates D, 2013, LME4 LINEAR MIXED EF  
 BENJAMINI Y, 1995, J ROY STAT SOC B MET, V57, P289  
 Brouwer ID, 1997, WORLD DEV, V25, P255, DOI 10.1016/S0305-750X(96)00100-3  
 Das I, 2017, ECOHEALTH, V14, P7, DOI 10.1007/s10393-016-1190-0  
 DeFries RS, 2010, NAT GEOSCI, V3, P178, DOI 10.1038/NGEO756  
 Foell W, 2011, ENER POLICY, V39, P7487, DOI 10.1016/j.enpol.2011.08.016  
 Foley JA, 2005, SCIENCE, V309, P570, DOI 10.1126/science.1111772  
 Fotheringham A. S., 2002, GEOGRAPHICALLY WEIGH  
 Fournier DA, 2012, OPTIM METHOD SOFTW, V27, P233, DOI 10.1080/10556788.2011.597854  
 Friedl MA, 2010, REMOTE SENS ENVIRON, V114, P168, DOI 10.1016/j.rse.2009.08.016  
 Global Energy Assessment (GEA), 2012, GLOBAL ENERGY ASSESS  
 Hiemstra-van der Horst G, 2009, BIOMASS BIOENERG, V33, P524  
 Institute for Health Metrics and Evaluation (IHME), 2013, GBD PROF MAL  
 Jagger P, 2016, ENER POLICY, V92, P409, DOI 10.1016/j.enpol.2016.02.034  
 Jagger P, 2014, ENER POLICY, V67, P713, DOI 10.1016/j.enpol.2013.11.068  
 Kelkar G, 2007, TESTING GENDER TOOLS  
 Knox J, 2012, ENVIRON RES LETT, V7, DOI 10.1088/1748-9326/7/3/034032  
 Lewis JJ, 2012, ENVIRON HEALTH PERSP, V120, P637, DOI 10.1289/ehp.1104194  
 Lim SS, 2012, LANCET, V380, P2224, DOI 10.1016/S0140-6736(12)61766-8  
 Lopez-Carr D, 2014, POPUL ENVIRON, V35, P323, DOI 10.1007/s11111-014-0209-0  
 Masera O, 2006, BIOMASS BIOENERG, V30, P618, DOI 10.1016/j.biombioe.2006.01.006  
 Masera OR, 2000, WORLD DEV, V28, P2083, DOI 10.1016/S0305-750X(00)00076-0  
 Nychka D, 2014, FIELDS TOOLS SPATIAL  
 Openshaw K, 2010, BIOMASS BIOENERG, V34, P365, DOI 10.1016/j.biombioe.2009.11.008  
 Pfeifer M, 2012, GLOBAL ECOL BIOGEOGR, V21, P603, DOI 10.1111/j.1466-8238.2011.00712.x  
 Ramanathan V, 2008, NAT GEOSCI, V1, P221, DOI 10.1038/ngeo156  
 Rehfuess EA, 2010, ENVIRON RES, V110, P725, DOI 10.1016/j.envres.2010.07.006  
 Schlag N., 2008, MARKET BARRIERS CLEA  
 Skaug H, 2014, GEN LINEAR MIXED MOD  
 Smeets EMW, 2007, CLIMATIC CHANGE, V81, P353, DOI 10.1007/s10584-006-9163-x  
 United Nations Department of Economic and Social Affairs (UNDESA) Population Division, 2015, WORLD POP PROSP 2015  
 Van Etten J., 2014, GDISTANCE DISTANCES  
 Vintrou E, 2012, INT J APPL EARTH OBS, V14, P83, DOI 10.1016/j.jag.2011.06.010  
 Perez-Heydrich C, 2016, SPAT DEMOGR, V4, P135  
 WHO, 2014, BURD DIS HOUS AIR PO

NR 39

TC 5

Z9 5  
U1 1  
U2 3  
PU IOP PUBLISHING LTD  
PI BRISTOL  
PA TEMPLE CIRCUS, TEMPLE WAY, BRISTOL BS1 6BE, ENGLAND  
SN 1748-9326  
J9 ENVIRON RES LETT  
JI Environ. Res. Lett.  
PD DEC  
PY 2016  
VL 11  
IS 12  
AR 125004  
DI 10.1088/1748-9326/11/12/125004  
PG 14  
WC Environmental Sciences; Meteorology & Atmospheric Sciences  
SC Environmental Sciences & Ecology; Meteorology & Atmospheric Sciences  
GA EY200  
UT WOS:000403808100001  
OA gold  
DA 2018-05-03  
ER

PT J  
AU Gandhi, P  
    Brager, GS  
AF Gandhi, Priya  
    Brager, Gail S.  
TI Commercial office plug load energy consumption trends and the role of  
    occupant behavior  
SO ENERGY AND BUILDINGS  
LA English  
DT Article  
DE Plug loads; Occupant behavior; Gamification  
ID INTERVENTION

AB This study evaluates the energy patterns of 137 individual plug loads (desktops, laptops, monitors, and task lights) collected in a California office building over two years, and the effects of a behavior-based intervention on a subset of these devices to reduce plug load energy consumption. An analysis of the data reveals that desktops consume the most power per person and demonstrate the widest range of power consumption, and that occupants are more likely to turn equipment off before a longer break from the office than overnight during the week. Much of the literature on reducing commercial plug loads is focused on technology-based solutions, while the literature on changing occupant behavior is focused on residential occupants. Multiple studies show that non-financial incentives, such as games, can motivate behavior change. An online sustainability game, Cool Choices, was initiated on-site with 30 occupants, where players competed on teams to earn points for completing resource-saving actions. The analysis revealed that because occupants were already engaging in relevant energy saving behaviors (e.g. turning equipment off at the end of the day), there was limited opportunity for further behavior-based reductions. This study highlights the need for additional research in commercial buildings examining how to motivate occupant behavior change through non-financial incentives. (C) 2016 Elsevier B.V. All rights reserved.

C1 [Gandhi, Priya; Brager, Gail S.] Univ Calif Berkeley, Ctr Built Environm, 390 Wurster Hall 1839, Berkeley, CA 94720 USA.

RP Gandhi, P (reprint author), Univ Calif Berkeley, Ctr Built Environm, 390 Wurster Hall 1839, Berkeley, CA 94720 USA.

EM priya.gandhi@berkeley.edu; gbrager@berkeley.edu

FU UC Berkeley Center for the Built Environment

FX Thanks to the UC Berkeley Center for the Built Environment for funding this project. Many thanks to Stefano Schiavon, David Lehrer, the Cool

Choices team, and the UC Office of the President.

- CR Abrahamse W, 2005, J ENVIRON PSYCHOL, V25, P273, DOI 10.1016/j.jenvp.2005.08.002  
 New Buildings Institute, 2012, PLUG LOAD BEST PRACT  
 California Public Utility Commission, 2008, CAL LONG TERM EN EFF  
 Claridge D.E., 2004, ASHRAE T, V110  
 Cortese A., 2014, OTHERS GETTING ZERO  
 Dean E., 2014, ZERO NET ENERGY CASE  
 Fuertes G., 2014, ROLE PLUG LOADS LEED  
 Ghatikar G., 2014, MISCELLANEOUS ELECT  
 Grossberg F., 2015, GAMIFIED ENERGY EFFI  
 Itron California End Use Survey California Energy Commission, 2006, CAL END US SURV  
 Kaneda D., 2010, PLUG LOAD REDUCTION, P9  
 Knapp R. H., 2013, SUSTAINABILITY PRACT  
 Kuntz K., 2012, P AM COUNC EN EFF EC, V7, P126  
 Ladhad A, 2013, J GREEN BUILD, V8, P3, DOI 10.3992/jgb.8.4.3  
 Lehrer D.R., 2014, P 2014 ACEEE SUMM ST  
 Lehrer D.R., 2014, USING FEEDBACK COMME  
 Lobato C., 2011, ASHRAE WINT C, P1  
 McKenney K., 2010, COMMERCIAL MISCELLAN, V498, P224  
 Mercier C., 2011, COMMERCIAL OFFICE PL  
 Metzger I., 2012, PLUG LOAD CONTROL BE  
 National Renewable Energy Laboratory, 2013, ASS RED PLUG PROC LO  
 Orland B, 2014, ENERG BUILDINGS, V74, P43, DOI 10.1016/j.enbuild.2014.01.036  
 Petersen E., 2007, INT J SUSTAINABILITY, V8, P16, DOI DOI 10.1108/14676370710717562  
 U. S. Energy Information Administration, 2003, COMM BUILD EN CONS S  
 US Energy Information Administration, 2014, ANN EN OUTL 2014  
 Yan D., 2014, EBC ANNEX 66 TEXT DE

NR 26

TC 5

Z9 5

U1 3

U2 28

PU ELSEVIER SCIENCE SA

PI LAUSANNE

PA PO BOX 564, 1001 LAUSANNE, SWITZERLAND

SN 0378-7788

EI 1872-6178

J9 ENERG BUILDINGS

J1 Energy Build.

PD AUG 1

PY 2016

VL 125

BP 1

EP 8

DI 10.1016/j.enbuild.2016.04.057

PG 8

WC Construction & Building Technology; Energy & Fuels; Engineering, Civil

SC Construction & Building Technology; Energy & Fuels; Engineering

GA DQ1LK

UT WOS:000378962300001

OA green\_published

DA 2018-05-03

ER

PT J

AU Zhang, HY

Lahr, ML

Bi, J

AF Zhang, Haiyan

Lahr, Michael L.

Bi, Jun

TI Challenges of green consumption in China: a household energy use perspective

SO ECONOMIC SYSTEMS RESEARCH

LA English

DT Article

DE Household energy use; urbanization; lifestyle change; structural decomposition analysis; China

ID STRUCTURAL DECOMPOSITION ANALYSIS; CARBON-DIOXIDE EMISSIONS; GROWING CO2 EMISSIONS; RESIDENTIAL BUILDINGS; RESOURCE CONSUMPTION; URBAN CONSTRUCTION; LABOR PRODUCTIVITY; EMPIRICAL-ANALYSIS; POLICY; DRAGON

AB To encourage economic progress, China's government has been pushing domestic consumption as a substitute for its waning growth in investment and exports. It has also been promoting greener policies for growth, of which green consumerism is a prime component. By examining the economy through the lens of household energy consumption, this paper lays out the challenges the nation must overcome through green consumption. We explore the trends in household energy use and decompose energy used indirectly by households into six factors: changes in total population, urbanization rate, energy efficiency, interindustry input mix, household consumption preferences, and per capita household consumption level. Doing so yields insights into how progress in industrial technology, household income, urbanization, and lifestyles has affected energy use in the production of goods and services used by households. It also offers policy suggestions on how China might guide lifestyle changes to effect green consumption.

C1 [Zhang, Haiyan; Bi, Jun] Nanjing Univ, State Key Lab Pollut Control & Resource Reuse, Sch Environm, Nanjing 210008, Jiangsu, Peoples R China.

[Zhang, Haiyan] Nanjing Univ, Johns Hopkins Univ, Ctr Chinese & Amer Studies, Nanjing 210008, Jiangsu, Peoples R China.

[Lahr, Michael L.] Rutgers State Univ, Bloustein Sch Planning & Publ Policy, New Brunswick, NJ 08903 USA.

RP Bi, J (reprint author), Nanjing Univ, State Key Lab Pollut Control & Resource Reuse, Sch Environm, Nanjing 210008, Jiangsu, Peoples R China.

EM jbi@nju.edu.cn

FU National Science Foundation of China [71433007, 71403118]; Clean Development Mechanism Project of China's National Development and Reform Commission [2013056]

FX This research was supported by the National Science Foundation of China [grant numbers 71433007 and 71403118] and the Clean Development Mechanism Project of China's National Development and Reform Commission [grant number 2013056].

CR Aldhous P, 2005, NATURE, V435, P1152, DOI 10.1038/4351152a

Ang BW, 2004, ENERG ECON, V26, P757, DOI 10.1016/j.eneco.2004.02.002

Deng L, 2011, J PLAN LIT, V26, P168, DOI 10.1177/0885412210390220

Dietzenbacher E, 2000, J REGIONAL SCI, V40, P425, DOI 10.1111/0022-4146.00182

Fan J., 2012, APPL ENERG, V101, P323, DOI 10.1016/j.apenergy.2012.01.020

Feng KS, 2012, J IND ECOL, V16, P600, DOI 10.1111/j.1530-9290.2012.00494.x

Feng KS, 2009, ECOL ECON, V69, P145, DOI 10.1016/j.ecolecon.2009.08.007

Feng ZH, 2011, ENERGY, V36, P656, DOI 10.1016/j.energy.2010.09.049

Fernandez JE, 2007, J IND ECOL, V11, P99, DOI 10.1162/jie.2007.1199

Glicksman LR, 2001, ANNU REV ENERG ENV, V26, P83, DOI 10.1146/annurev.energy.26.1.83

Golley J, 2012, ENERG ECON, V34, P1864, DOI 10.1016/j.eneco.2012.07.025

Guan D, 2009, GEOPHYS RES LETT, V36, DOI 10.1029/2008GL036540

Han J, 2008, TRANSPORT RES D-TR E, V13, P471, DOI 10.1016/j.trd.2008.09.007

Hubacek K, 2012, ENERGIES, V5, P22, DOI 10.3390/en5010022

Jotzo F., 2014, DEEPENING REFORM CHI, P207

Li BZ, 2009, RENEW ENERG, V34, P1994, DOI 10.1016/j.renene.2009.02.015

Liu HT, 2009, ENERG POLICY, V37, P3194, DOI 10.1016/j.enpol.2009.04.016

Liu JG, 2003, NATURE, V421, P530, DOI 10.1038/nature01359

Liu JG, 2005, NATURE, V435, P1179, DOI 10.1038/4351179a

Liu JR, 2005, POPUL ENVIRON, V26, P325, DOI 10.1007/s11111-005-3345-8  
 Liu LC, 2007, ENERG POLICY, V35, P5892, DOI 10.1016/j.enpol.2007.07.010  
 Liu LC, 2011, J CLEAN PROD, V19, P1754, DOI 10.1016/j.jclepro.2011.06.011  
 Lu SL, 2014, RENEW SUST ENERG REV, V38, P765, DOI 10.1016/j.rser.2014.07.015  
 Miller R. E., 2009, INPUT OUTPUT ANAL FD  
 Minx JC, 2011, ENVIRON SCI TECHNOL, V45, P9144, DOI 10.1021/es201497m  
 National Bureau of Statistics of China, 2014, 2014 CHIN STAT YB  
 National Bureau of Statistics of China, 2009, 2009 CHIN EN STAT YB  
 National Bureau of Statistics of China, 2011, 2011 CHIN STAT YB  
 National Bureau of Statistics of China, 1998, 1991 1996 CHIN EN ST  
 National Bureau of Statistics of China, 2011, 2011 CHIN EN STAT YB  
 National Bureau of Statistics of China, 1990, 1989 CHIN STAT YB  
 Ouyang JL, 2010, ENERGY, V35, P5269, DOI 10.1016/j.energy.2010.07.038  
 Pachauri S, 2008, ENERG POLICY, V36, P4022, DOI 10.1016/j.enpol.2008.06.016  
 Peters GP, 2007, ENVIRON SCI TECHNOL, V41, P5939, DOI 10.1021/es070108f  
 Wang C, 2005, ENERGY, V30, P73, DOI 10.1016/j.energy.2004.04.002  
 Wang XH, 1999, ENERGY, V24, P493, DOI 10.1016/S0360-5442(99)00006-7  
 Wang XH, 2001, ENERG POLICY, V29, P1391  
 Wei YM, 2007, ENERG POLICY, V35, P247, DOI 10.1016/j.enpol.2005.11.020  
 Yang L, 2010, CHINA ECON REV, V21, P557, DOI 10.1016/j.chieco.2010.05.012  
 Zhang HY, 2014, ECON SYST RES, V26, P119, DOI 10.1080/09535314.2014.880663  
 Zhang LX, 2009, RENEW ENERG, V34, P2813, DOI 10.1016/j.renene.2009.04.006  
 Zhang M, 2009, ECOL ECON, V68, P2122, DOI 10.1016/j.ecolecon.2009.02.005  
 Zhao J, 2009, ENERG POLICY, V37, P2106, DOI 10.1016/j.enpol.2008.11.045  
 Zheng S., 2010, J ECON GEOGR, V11, P761, DOI DOI 10.1093/JEG/LBQ031  
 Zhu YX, 2004, ENERG BUILDINGS, V36, P1287, DOI 10.1016/j.enbuild.2003.11.007

NR 45

TC 5

Z9 5

U1 6

U2 41

PU ROUTLEDGE JOURNALS, TAYLOR & FRANCIS LTD

PI ABINGDON

PA 4 PARK SQUARE, MILTON PARK, ABINGDON OX14 4RN, OXFORDSHIRE, ENGLAND

SN 0953-5314

EI 1469-5758

J9 ECON SYST RES

JI Econ. Syst. Res.

PD JUN

PY 2016

VL 28

IS 2

BP 183

EP 201

DI 10.1080/09535314.2016.1144563

PG 19

WC Economics

SC Business & Economics

GA DM0KA

UT WOS:000376031700005

DA 2018-05-03

ER

PT J

AU Boomsma, C

Goodhew, J

Goodhew, S

Pahl, S



AF Boomsma, Christine

Goodhew, Julie

Goodhew, Steve

Pahl, Sabine

TI Improving the visibility of energy use in home heating in England:

Thermal images and the role of visual tailoring

SO ENERGY RESEARCH & SOCIAL SCIENCE

LA English

DT Article

DE Energy efficiency; Tailoring; Visualisation; Communication

ID CLIMATE-CHANGE; BEHAVIOR; INTERVENTIONS; CONSERVATION; CONSUMPTION;  
FEEDBACK; COMMUNICATION; DESIGN

AB This study examined the use of thermal imaging as a communication tool that allows householders to 'see' where a building is losing heat. We tested the effect of tailored and non-tailored thermal images on energy beliefs, behavioural intentions and a simple self-report behaviour question in an English field study. Householders received tailored thermal images of their home, thermal images of other homes with typical problems for the area ('non-tailored'), or information on the same typical problems in text format. A post-intervention survey (N = 233) indicated that showing occupants any thermal image (tailored or non-tailored) led to higher vividness when recalling the communication, compared to text-only information. Householders engaged with the reports to a greater extent when they were personal to their home: the tailored thermal images were more likely to be shared with others and led to stronger energy saving intentions and reporting energy efficiency behaviour compared to non-tailored reports. This is a promising approach integrating technology and social science knowledge and methods. (C) 2016 Elsevier Ltd. All rights reserved.

C1 [Boomsma, Christine; Goodhew, Julie; Pahl, Sabine] Univ Plymouth, Sch Psychol, Portland Sq, Plymouth PL4 8AA, Devon, England.

[Goodhew, Steve] Univ Plymouth, Sch Architecture Design & Environm, Roland Levinsky Bldg, Plymouth PL4 8AA, Devon, England.

RP Pahl, S (reprint author), Univ Plymouth, Sch Psychol, Portland Sq, Plymouth PL4 8AA, Devon, England.

EM christine.boomsma@plymouth.ac.uk; julie.goodhew@plymouth.ac.uk;

steve.goodhew@plymouth.ac.uk; sabine.pahl@plymouth.ac.uk

OI Goodhew, Julie/0000-0001-9564-1393; Goodhew, Steve/0000-0003-1227-217X

FU UK government's Department for Energy and Climate Change as part of the 'Cheaper Energy Together competition'; Engineering and Physical Sciences Research Council under Transforming Energy Demand in Buildings through Digital Innovation (TEDDI) [EP/K002465/1]

FX The authors would like to thank all the householders in Cornwall who participated in this study. We thank the research staff and the Cornwall Together team at the Eden Project for their support throughout this project, in particular Andrew Jasper, Matt Hastings and Peter Blenard. We are grateful for the support of our team: Christianne Garrill, Matthew Fox, Charles McGilligan, Linzi Smith, Solomon Danganana, Donna Trevelyan and Amy Hurst. Also, thanks to the Sustainability and Psychology Research Group at Plymouth University for their feedback in writing up this research. This research and paper was funded by the UK government's Department for Energy and Climate Change as part of the 'Cheaper Energy Together competition' and through the eViz Project, a consortium of four UK universities (eviz.org.uk) funded by the Engineering and Physical Sciences Research Council under Transforming Energy Demand in Buildings through Digital Innovation (TEDDI) [grant number EP/K002465/1].

CR Abrahamse W, 2005, J ENVIRON PSYCHOL, V25, P273, DOI 10.1016/j.jenvp.2005.08.002

Abrahamse W, 2007, J ENVIRON PSYCHOL, V27, P265, DOI 10.1016/j.jenvp.2007.08.002

AECOM, 2011, EN DEM RES PROJ FIN

Andrade J., 2012, J EXP PSYCHOPATHOL, V3, P127, DOI DOI 10.5127/JEP.024611

Association for the Conservation of Energy, 2015, COLD MAN EUR 2015

Bailey JO, 2015, ENVIRON BEHAV, V47, P570, DOI 10.1177/0013916514551604

Bjork E. L., 2011, PSYCHOL REAL WORLD E, P1

Boomsma C., 2013, THESIS  
 Brandon G, 1999, J ENVIRON PSYCHOL, V19, P75, DOI 10.1006/jevp.1998.0105  
 Burchell K., 2014, WORKING TOGETHER SAV  
 Burgess J, 2008, ENER POLICY, V36, P4454, DOI 10.1016/j.enpol.2008.09.039  
 Chen VL, 2014, ENER BUILDINGS, V70, P455, DOI 10.1016/j.enbuild.2013.11.069  
 Chiang T., 2012, ENERGY BUILD, V70, P507  
 Chiang T, 2012, ENER BUILDINGS, V55, P471, DOI 10.1016/j.enbuild.2012.07.026  
 [Anonymous], 2015, AM PSYCHOL  
 Daamen DDL, 2001, ENVIRON BEHAV, V33, P229, DOI 10.1177/00139160121972963  
 Darby S, 2001, ENERGY EFFICIENCY IN HOUSEHOLD APPLIANCES AND LIGHTING, P685  
 Darby S, 2006, EFFECTIVENESS FEEDBA  
 de Vries H, 1999, PATIENT EDUC COUNS, V36, P99  
 DECC, 2013, EN CONS UK  
 DECC, 2013, QUANT RES PUBL AW AT  
 EEA European Environment Agency, 2015, FIN EN CONS SECT FUE  
 Ehrhardt-Martinez K., 2010, ADV METERING INITIAT  
 Field A, 2013, DISCOVERING STAT USI  
 Fischer C, 2008, ENER EFFIC, V1, P79, DOI 10.1007/s12053-008-9009-7  
 Gifford R, 2014, ANNU REV PSYCHOL, V65, P541, DOI 10.1146/annurev-psych-010213-115048  
 Goodhew J, 2015, ENVIRON BEHAV, V47, P1059, DOI 10.1177/0013916514546218  
 Guy S., 2000, SOCIOLOGY ENERGY BUI  
 Hargreaves T., 2010, 141 TYND CTR CLIM CH  
 Hargreaves T, 2010, ENER POLICY, V38, P6111, DOI 10.1016/j.enpol.2010.05.068  
 HIRST E, 1983, J ENVIRON SYST, V12, P303  
 Kavanagh DJ, 2005, PSYCHOL REV, V112, P446, DOI 10.1037/0033-295X.112.2.446  
 Kreuter M., 2000, TAILORING HLTH MESSA  
 McDaniel M. A., 2011, SUCCESSFUL REMEMBERI, P175  
 McMakin AH, 2002, ENVIRON BEHAV, V34, P848, DOI 10.1177/001391602237252  
 Midden CJH, 2007, J SOC ISSUES, V63, P155, DOI 10.1111/j.1540-4560.2007.00501.x  
 Smith W., 1999, FOSTERING SUSTAINABL  
 Murphy L, 2014, ENER POLICY, V65, P398, DOI 10.1016/j.enpol.2013.10.016  
 Nicholson-Cole S. A., 2005, Computers, Environment and Urban Systems, V29, P255, DOI 10.1016/j.compenvurbsys.2004.05.002  
 Noar SM, 2007, PSYCHOL BULL, V133, P673, DOI 10.1037/0033-2909.133.4.673  
 O'Neill SJ, 2014, WIRES CLIM CHANGE, V5, P73, DOI 10.1002/wcc.249  
 O'Neill SJ, 2013, GLOBAL ENVIRON CHANG, V23, P413, DOI 10.1016/j.gloenvcha.2012.11.006  
 ODYSSEE-MURE, 2015, ENERGY EFFICIENCY TR  
 Parnell R, 2005, ENVIRON BEHAV, V37, P787, DOI 10.1177/0013916504274008  
 Pearson C., 2011, THERMAL IMAGING BUIL  
 Petty R. E., 1986, ADV EXPT SOCIAL PSYC, P1, DOI DOI 10.1016/S0065-2601(08)60214-2  
 Revere D, 2001, J AM MED INFORM ASSN, V8, P62, DOI 10.1136/jamia.2001.0080062  
 Rimer BK, 2006, J COMMUN, V56, pS184, DOI 10.1111/j.1460-2466.2006.00289.x  
 Sheppard SRJ, 2005, ENVIRON SCI POLICY, V8, P637, DOI 10.1016/j.envsci.2005.08.002  
 Skinner CS, 1999, ANN BEHAV MED, V21, P290, DOI 10.1007/BF02895960  
 Snell J., 2008, TESTING BUILDING ENV  
 Sovacool BK, 2014, ENERGY RES SOC SCI, V1, P1, DOI 10.1016/j.erss.2014.02.003  
 Steg L, 2008, ENER POLICY, V36, P4449, DOI 10.1016/j.enpol.2008.09.027  
 Stern PC, 1999, J CONSUM POLICY, V22, P461, DOI DOI 10.1023/A:1006211709570  
 TAYLOR SE, 1982, PSYCHOL REV, V89, P155, DOI 10.1037/0033-295X.89.2.155  
 WINETT RA, 1982, J ENVIRON SYST, V12, P61, DOI 10.2190/B4DN-N9H8-A57Y-2JDG  
 Wood G, 2003, ENER BUILDINGS, V35, P821, DOI 10.1016/S0378-7788(02)00241-4  
 [Anonymous], 2015, GLOBE MAIL

NR 58

TC 5

Z9 5

U1 1

U2 10

PU ELSEVIER SCIENCE BV

PI AMSTERDAM  
 PA PO BOX 211, 1000 AE AMSTERDAM, NETHERLANDS  
 SN 2214-6296  
 EI 2214-6326  
 J9 ENERGY RES SOC SCI  
 JI Energy Res. Soc. Sci.  
 PD APR  
 PY 2016  
 VL 14  
 BP 111  
 EP 121  
 DI 10.1016/j.erss.2016.01.005  
 PG 11  
 WC Environmental Studies  
 SC Environmental Sciences & Ecology  
 GA DQ8BR  
 UT WOS:000379434600011  
 DA 2018-05-03  
 ER

PT J  
 AU He, XP  
 Reiner, D  
 AF He, Xiaoping  
 Reiner, David  
 TI Electricity demand and basic needs: Empirical evidence from China's households

SO ENERGY POLICY  
 LA English  
 DT Article

DE Electricity; Household; Basic needs; Quantile regression

ID ENERGY POVERTY; TRANSITION; COUNTRIES; LESSONS; ACCESS; MARKET; REFORM; MODEL; COST; COAL

AB An increasing block tariff (IBT) has been implemented nationwide in the residential sector in China since 2012. However, knowledge about IBT design is still limited, particularly how to determine the electricity volume for the first block of an IBT scheme. Assuming the first block should be set based on some measure of electricity poverty; we attempt to model household electricity demand such that the range of basic needs can be established. We show that in Chinese households there exists a threshold for electricity consumption with respect to income, which could be considered a measure of electricity poverty, and the threshold differs between rural and urban areas. For rural (urban) families, electricity consumption at the level of 7th (5th) income decile households can be considered the threshold for basic needs or a measure of electricity poverty since household electricity demand in rural (urban) areas does not respond to income changes until after 7th (5th) income decile. Accordingly, the first IBT block for some provinces (e.g., Beijing) appears to have been set at a level that is too high. Over time however, given continued rapid growth, the IBT will begin to better reflect actual basic needs. (C) 2015 Elsevier Ltd. All rights reserved.

C1 [He, Xiaoping] Xiamen Univ, Sch Econ, Collaborat Innovat Ctr Energy Econ & Energy Polic, Xiamen 361005, Peoples R China.

[Reiner, David] Univ Cambridge, Judge Business Sch, Energy Policy Res Grp, Trumpington St, Cambridge CB2 1AG, England.

RP He, XP (reprint author), Xiamen Univ, Sch Econ, Collaborat Innovat Ctr Energy Econ & Energy Polic, Xiamen 361005, Peoples R China.

EM xphe@xmu.edu.cn; dmr40@cam.ac.uk

OI Reiner, David/0000-0003-2004-8696

FU National Natural Science Foundation of China [71203187, 71573217];  
 Fundamental Research Funds for the Central Universities [20720151028,  
 20720151039]

FX XH gratefully acknowledges supports from the National Natural Science Foundation of China (Nos. 71203187 and 71573217) and the Fundamental

- Research Funds for the Central Universities (Nos. 20720151028 and 20720151039).
- CR Asaduzzaman M, 2010, WOR BANK WORK PAPER, P1, DOI 10.1596/978-0-8213-7897-7
- Barnes DF, 2011, ENER POLICY, V39, P894, DOI 10.1016/j.enpol.2010.11.014
- BBS, 2010, BEIJ STAT YB 2010
- Bhattacharyya SC, 2012, ENER POLICY, V49, P676, DOI 10.1016/j.enpol.2012.07.003
- Boardman B, 1991, FUEL POVERTY COLD HO
- Whittington D., 1998, WORLD BANK SPONS WOR
- Bradbrook AJ, 2006, HUM RIGHTS QUART, V28, P389, DOI 10.1353/hrq.2006.0015
- Bravo V., 1983, 28051 UNU
- Coase RH, 1946, ECONOMICA-NEW SER, V13, P169, DOI 10.2307/2549764
- DEFRA/DTI, 2001, UK FUEL POV STRAT
- Demurger S, 2011, CHINA ECON REV, V22, P512, DOI 10.1016/j.chieco.2010.09.009
- Fankhauser S, 2007, ENER POLICY, V35, P1038, DOI 10.1016/j.enpol.2006.02.003
- Galli R, 1998, ENERGY J, V19, P85
- GOLDEMBERG J, 1985, AMBIO, V14, P190
- Denniss R., 2008, ENERGY AFFORDABILITY
- HENNESSY M, 1984, EVALUATION REV, V8, P327, DOI 10.1177/0193841X8400800303
- Hills J., 2012, 72 CASE
- KRUGMANN H, 1983, TECHNOL FORECAST SOC, V24, P45, DOI 10.1016/0040-1625(83)90062-8
- LEACH G, 1992, ENER POLICY, V20, P116, DOI 10.1016/0301-4215(92)90105-B
- Liddell C., 2011, DEFINING FUEL POVERT
- Lin BQ, 2012, ENER POLICY, V42, P164, DOI 10.1016/j.enpol.2011.11.062
- Lin BQ, 2011, ENER ECON, V33, P273, DOI 10.1016/j.eneco.2010.07.005
- Liu MH, 2013, ENER ECON, V40, P167, DOI 10.1016/j.eneco.2013.05.021
- Yang J., 2010, PRICE THEORY PRACTIC, V3, P12
- Luo G, 2008, CHIN AGR SCI B, V24, P535
- Masera OR, 2000, WORLD DEV, V28, P2083, DOI 10.1016/S0305-750X(00)00076-0
- Medlock KB, 2001, ENERGY J, V22, P77
- NBS, 2013, CHIN REG AGR STAT RE
- NBS, 2011, CHIN RUR HOUS SURV Y
- National Bureau of Statistics (NBS), 2014, CHIN EN STAT YB 2013
- National Bureau of Statistics (NBS), 2011, CHIN EN STAT YB 2010
- NBS, 2013, CHIN HOUS SURV YB 20
- Nussbaumer P, 2012, RENEW SUST ENER REV, V16, P231, DOI 10.1016/j.rser.2011.07.150
- Osbaldeston J., 1984, CITIES, V1, P366, DOI 10.1016/0264-2751(84)90009-X
- Shonali P., 2004, EC POLIT WEEKLY, V39, P271
- Pachauri S, 2008, ENER POLICY, V36, P4022, DOI 10.1016/j.enpol.2008.06.016
- Parikh J.K., 1978, ENERGY, V3, P631
- Petersen H.C., 1982, PUBLIC UTIL FORTN, V110, P33
- Pollitt M, 2009, UTIL POLICY, V17, P13, DOI 10.1016/j.jup.2008.02.006
- RAVALLION M, 1994, WORLD BANK ECON REV, V8, P75, DOI 10.1093/wber/8.1.75
- Rubin DB, 1987, MULTIPLE IMPUTATIONS
- Sovacool BK, 2012, ENER POLICY, V42, P715, DOI 10.1016/j.enpol.2011.12.007
- STREETEN P, 1984, WORLD DEV, V12, P973, DOI 10.1016/0305-750X(84)90054-8
- Wang B, 2007, ENER POLICY, V35, P4959, DOI 10.1016/j.enpol.2007.04.022
- Wodon Q., 2003, INFRASTRUCTURE POOR, V823, P227
- Zhou SJ, 2013, ENER POLICY, V61, P394, DOI 10.1016/j.enpol.2013.06.092
- NR 46
- TC 5
- Z9 5
- U1 3
- U2 16
- PU ELSEVIER SCI LTD
- PI OXFORD
- PA THE BOULEVARD, LANGFORD LANE, KIDLINGTON, OXFORD OX5 1GB, OXON, ENGLAND
- SN 0301-4215
- EI 1873-6777

J9 ENERG POLICY

J1 Energy Policy

PD MAR

PY 2016

VL 90

BP 212

EP 221

DI 10.1016/j.enpol.2015.12.033

PG 10

WC Economics; Energy & Fuels; Environmental Sciences; Environmental Studies

SC Business & Economics; Energy & Fuels; Environmental Sciences & Ecology

GA DD7KX

UT WOS:000370104500021

DA 2018-05-03

ER

PT S

AU Mutani, G

Delmastro, C

Gargiulo, M

Corgnati, SP

AF Mutani, Guglielmina

Delmastro, Chiara

Gargiulo, Maurizio

Corgnati, Stefano P.

BE Masoero, MC

Arsie, I

TI Characterization of building thermal energy consumption at the urban scale

SO 71ST CONFERENCE OF THE ITALIAN THERMAL MACHINES ENGINEERING ASSOCIATION (ATI 2016)

SE Energy Procedia

LA English

DT Proceedings Paper

CT 71st Conference of the Italian-Thermal-Machines-Engineering-Association (ATI)

CY SEP 14-16, 2016

CL Politecnico Torino, Turin, ITALY

SP Italian Thermal Machines Engn Assoc

HO Politecnico Torino

DE building stock; urban; energy modeling; GIS; space heating

ID SECTOR

AB The ongoing urban transition toward decarbonized energy systems has raised the attention on local energy planning practices. Besides the multiple actors involved in the planning process, the complexity of the urban energy systems requires the elaboration of heterogeneous data. In such contest, the paper introduces and compares two GIS-based methodologies for supporting the spatial characterization of the local residential built environment in terms of building distribution and space heating energy consumption. Starting from the assessment of residential consumption, a third method for the characterization of non-residential building thermal energy consumption is proposed. From a bottom-up perspective, in both residential models all the buildings are geo-referenced and clustered according to their thermo-physical characteristics. From a top-down perspective, energy balance data are used to calibrate the bottom-up results and to match the total building loads. The procedure, tested on the city of Turin as case study, allows assessing the energy use of buildings and to create urban energy maps.

The energy spatial characterization of a territory is the basis for performing short and long-term scenarios analysis. Results of this method can be useful to: i. decision maker to understand the current state of the territorial energy consumption to identify critical energy intense areas; ii. citizens for visualising their energy consumption and iii. researchers for setting up the basis of further urban analysis. (C) 2016 The Authors. Published by Elsevier Ltd.

C1 [Mutani, Guglielmina; Delmastro, Chiara; Corgnati, Stefano P.] Politecn Torino, DENERG, Cso Duca Abruzzi, I-10124 Turin, Italy.

[Gargiulo, Maurizio] E4SMA, Via Livorno 60, ENVIRONM Pk, Turin, Italy.

RP Delmastro, C (reprint author), Politecn Torino, DENERG, Cso Duca Abruzzi, I-10124 Turin, Italy.

EM chiara.delmastro@polito.it

OI Delmastro, Chiara/0000-0002-4786-0839

CR Ascione F, 2013, CITIES, V35, P270, DOI 10.1016/j.cities.2013.04.012

Brownsword RA, 2005, APPL ENERG, V82, P167, DOI 10.1016/j.apenergy.2004.10.005

Caputo P, 2013, ENERG POLICY, V55, P261, DOI 10.1016/j.enpol.2012.12.006

Corgnati SP, 2013, APPL ENERG, V102, P983, DOI 10.1016/j.apenergy.2012.06.001

Dall'O' G, 2012, ENERG BUILDINGS, V48, P211, DOI 10.1016/j.enbuild.2012.01.034

Fabbri K, 2012, ENERG BUILDINGS, V48, P137, DOI 10.1016/j.enbuild.2012.01.018

Fracastoro GV, 2011, ENERG BUILDINGS, V43, P844, DOI 10.1016/j.enbuild.2010.12.004

Fracastoro GV, 2009, STAT ANAL ENERGY PER

Harish VSKV, 2016, RENEW SUST ENERG REV, V56, P1272, DOI 10.1016/j.rser.2015.12.040

Hong TZ, 2016, ENERG BUILDINGS, V116, P694, DOI 10.1016/j.enbuild.2015.11.052

Howard B, 2012, ENERG BUILDINGS, V45, P141, DOI 10.1016/j.enbuild.2011.10.061

Kazmi H, 2016, APPL ENERG, V175, P1, DOI 10.1016/j.apenergy.2016.04.108

Lombardi P, 2013, INT J SUSTAINABLE BU, V4, P274

Mattinen MK, 2014, J CLEAN PROD, V81, P70, DOI 10.1016/j.jclepro.2014.05.054

Mutani G, MODEL EVALUATE HEATI, P21

Mutani G., 2015, J CIV ENG ARCHIT RES, V2, P1102

Mutani G., 2013, 8 ENERGY FORUM ADV B, P87

Panayiotou GP, 2010, ENERG BUILDINGS, V42, P2083, DOI 10.1016/j.enbuild.2010.06.018

[Anonymous], 2014, 11300 UNI EN

[Anonymous], 2012, TAPE TOR ACT PLAN EN

NR 20

TC 5

Z9 5

U1 0

U2 0

PU ELSEVIER SCIENCE BV

PI AMSTERDAM

PA SARA BURGERHARTSTRAAT 25, PO BOX 211, 1000 AE AMSTERDAM, NETHERLANDS

SN 1876-6102

J9 ENRGY PROCED

PY 2016

VL 101

BP 384

EP 391

DI 10.1016/j.egypro.2016.11.049

PG 8

WC Thermodynamics; Engineering, Mechanical

SC Thermodynamics; Engineering

GA BH1HC

UT WOS:000398030000049

OA gold

DA 2018-05-03

ER

PT J

AU Berry, S

Marker, T

AF Berry, Stephen

Marker, Tony

TI Residential energy efficiency standards in Australia: where to next?

SO ENERGY EFFICIENCY

LA English

DT Article

DE House energy regulation; Zero carbon homes; Energy efficiency;

Performance-based regulation

ID ZERO-ENERGY; PUBLIC-HEALTH; HOMES; PERSPECTIVE; MORBIDITY; MORTALITY;  
CARBON

AB Increasing the energy and carbon efficiency of homes has been at the forefront of international climate change mitigation policy. In Australia, recent policy action led to the introduction of minimum energy efficiency standards for new homes within the Building Code of Australia in 2003, with subsequent stringency increases in 2006 and 2010. Although not yet reflecting international best regulatory practice, these standards represent substantial progress in addressing the energy and carbon emission impact of new homes, yet there are a number of energy policy challenges that highlight the need for further change. This paper documents the history of house energy standards in Australia and examines the post-occupancy evidence of that policy outcome. The paper examines international and domestic issues pointing to a possible future direction for Australian house energy regulation, highlighting the key drivers for change. In particular, we investigate the concepts of net zero carbon and net zero energy homes which have recently been adopted internationally, examining the technical and economic evidence that would support such a policy position in Australia.

C1 [Berry, Stephen] Univ S Australia, Barbara Hardy Inst, Mawson Lakes, SA 5095, Australia.

[Marker, Tony] Pitt & Sherry, Launceston, Tas 7250, Australia.

RP Berry, S (reprint author), GPO Box 2471, Adelaide, SA 5001, Australia.

EM stephen.berry@unisa.edu.au

OI Berry, Stephen/0000-0003-2492-450X

CR Allen Consulting Group, 2011, MAND DISC RES BUILD

Ambrose M. D., 2013, EVALUATION 5 STAR EN

Australian Building Codes Board, 2002, EN EFF MEAS BCA, V2

Australian Bureau of Statistics, 2010, BUILD APPR 8731 0

Australian Building Codes Board, 2006, PROP AM BCA INCR EN

Australian Building Codes Board, 2009, PROP REV EN EFF REQ

Australian Greenhouse Office, 2000, IMPL UN SERV OBL CON

Australian Energy Market Commission, 2013, 2013 RES EL PRIC TRE

Australian Energy Market Commission, 2013, STRAT PRIOR EN MARK

Australian Greenhouse Office, 1998, NAT GREENH STRAT

Australian Greenhouse Office, 1999, SCOP STUD MIN EN PER

Australian Minerals Energy Council, 1990, EN GREENH EFF

Australian and New Zealand Environment Council, 1990, NAT GREENH STRAT AUS

AusZEH, 2010, AUSTR ZER EM DEM HOU

Berry Michael, 2007, Software Process and Product Measurement. International Conference, IWSM-Mensura 2007, P1

Berry S., 2001, ECEEE SUMM STUD

Berry S, 2014, TECHNICAL EC FEASIBI

Berry S, 2014, ENRGY PROCED, V62, P112, DOI 10.1016/j.egypro.2014.12.372

Berry S, 2014, ENER POLICY, V73, P127, DOI 10.1016/j.enpol.2014.05.011

Berry S, 2014, RENEW ENER, V67, P80, DOI 10.1016/j.renene.2013.11.031

Berry S, 2014, ENER EFFIC, V7, P303, DOI 10.1007/s12053-013-9225-7

Berry S, 2013, ENER POLICY, V62, P646, DOI 10.1016/j.enpol.2013.07.067

Beyond Zero Emissions, 2013, ZER CARB AUSTR BUILD

Bi P, 2011, ASIA-PAC J PUBLIC HE, V23, p275, DOI 10.1177/1010539510391644

Building Regulation Review Taskforce, 1991, MICR REF BUILD REG

Building Regulation Review Taskforce, 1991, MOD COD EN EFF BUILD

Buildings Performance Institute Europe, 2011, PRINC NEARL ZER EN B

Bulkeley H, 2001, GLOBAL ENVIRON CHANG, V11, P155, DOI 10.1016/S0959-3780(00)00064-9

[Anonymous], 2013, SOL PV PRIC CHECK DE

Council of Australian Governments, 1992, NAT GREENH RESP STRA

Council of Australian Governments, 2009, NAT STRAT EN EFF

de la Tour A, 2013, ENERGY, V62, P341, DOI 10.1016/j.energy.2013.09.037

Delsante A, 2003, DESCRIPTION FEATURES

Department of Climate Change, 2008, CARB POLL RED SCHEM

Department of Climate Change and Energy Efficiency, 2012, NAT BUILD EN STAND S

Department of Climate Change and Energy Efficiency, 2010, REP PRIM MIN TASK GR  
 Department of Climate Change and Energy Efficiency, 2012, INCL EN GEN BUILD EN  
 Department for Communities and Local Government, 2006, BUILD GREEN FUT ZER  
 Department for Communities and Local Government, 2007, BUILD GREEN FUT POL  
 Department for Environment Food and Rural Affairs, 2007, UK EN EFF ACT PLAN  
 Department of the Environment Water Heritage and the Arts, 2008, EN EFF RAT HOUS PRIC  
 Department of the Prime Minister and Cabinet, 2004, SEC AUSTR EN FUT  
 [Energy and Tourism Department of Resources], 2012, EN WHIT PAP  
 Greene D., 1990, REDUCING GREENHOUSE, V26  
 Greene D., 1990, GREENHOUSE ENERGY ST  
 Halverson M., 2002, ACEEE SUMM STUD EN E  
 Hawke R. J., 1989, OUR COUNTRY OUR FUTU  
 Horne R. E., 2005, INT COMP BUILDING EN  
 Howard J., 1997, SAFEGUARDING FUTURE  
 Intergovernmental Committee on Ecologically Sustainable Development, 1995, PROGR IMPL NAT  
 GREEN  
 International Energy Agency, 2014, CAPT MULT BEN EN EFF  
 The International Energy Agency, 2013, MOD BUILD EN COD SEC  
 Intergovernmental Panel on Climate Change, 2014, WORK GROUP 3 MIT CLI  
 Jagemar L., 2011, REHVA J, V48, P14  
 Janda K, 2008, IMPR EN EFF COMM BUI  
 Kapsalaki M, 2011, ADV BUILD ENERGY RES, V5, P129, DOI 10.1080/17512549.2011.582352  
 Keating P, 1993, AUSTR ENV NATURAL AS  
 Langham E, 2010, BUILDING OUR SAVINGS  
 J Laustsen, 2008, ENERGY EFFICIENCY RE  
 Leech JA, 2004, INDOOR AIR, V14, P169, DOI 10.1111/j.1600-0668.2004.00212.x  
 Macdonald I., 2005, PROPOSED 5 STAR ENER  
 Miller W, 2012, BUILD ENVIRON, V56, P57, DOI 10.1016/j.buildenv.2012.02.023  
 Moore T., 2014, ENV INNOVAT IN PRESS  
 Moore T, 2012, FACILITATING TRANSIT  
 Moore T, 2014, ENERGBUILDINGS, V70, P463, DOI 10.1016/j.enbuild.2013.11.084  
 Morrissey J, 2011, ENERGBUILDINGS, V43, P915, DOI 10.1016/j.enbuild.2010.12.013  
 Nitschke M, 2007, MED J AUSTRALIA, V187, P662  
 Organisation for Economic Co-operation and Development, 2011, GREEN HOUS BEH ROL P  
 Papineau M, 2006, ENERGPOLICY, V34, P422, DOI 10.1016/j.enpol.2004.06.008  
 PriceWaterhouseCoopers, 2008, REV EN EFF POL OPT R  
 Productivity Commission, 2005, PRIV COST EFF IMPR E  
 Productivity Commission, 2004, REF BUILD REG  
 Saddler H., 2013, POWER WHY IS EL CONS  
 Saniotis A, 2009, AUST HEALTH REV, V33, P611, DOI 10.1071/AH090611  
 Schettler-Kohler H., 2009, EPBD IMPLEMENTATION  
 Schimschar S, 2011, ENERGPOLICY, V39, P3346, DOI 10.1016/j.enpol.2011.03.029  
 Senior Officials Group on Energy Efficiency, 2010, NAT BUILD EN STAND S  
 Senate Standing Committee on Industry Science and Technology, 1991, RESC FUT RED IMP GRE  
 Spooner ED, 2000, ENERGPOLICY, V28, P1059, DOI 10.1016/S0301-4215(00)00092-6  
 Sustainability House, 2012, ID COST SAV BUILD 2  
 Tsao JY, 2010, J PHYS D APPL PHYS, V43, DOI 10.1088/0022-3727/43/35/354001  
 Urge-Vorsatz D., 2009, ECEEE SUMM STUD  
 US Department of Energy, 2010, BUILD REG PROGR MULT  
 Van Mierlo B., 2012, SUSTAINABILITY SCI P, V8, P4  
 Watt M., 2003, ANZSES C NOV 2003  
 Weiss M, 2010, TECHNOL FORECAST SOC, V77, P411, DOI 10.1016/j.techfore.2009.10.009  
 Donaldson K., 2005, ENERGY IN AUSTR  
 Williamson T., 2006, PASS LOW EN ARCH C  
 Williamson T., 2000, AD ANZASCA C

NR 89

TC 5

Z9 5



U1 0  
 U2 10  
 PU SPRINGER  
 PI DORDRECHT  
 PA VAN GODEWIJCKSTRAAT 30, 3311 GZ DORDRECHT, NETHERLANDS  
 SN 1570-646X  
 EI 1570-6478  
 J9 ENERG EFFIC  
 JI Energy Effic.  
 PD OCT  
 PY 2015  
 VL 8  
 IS 5  
 BP 963  
 EP 974  
 DI 10.1007/s12053-015-9336-4  
 PG 12  
 WC GREEN & SUSTAINABLE SCIENCE & TECHNOLOGY; Energy & Fuels; Environmental  
 Studies  
 SC Science & Technology - Other Topics; Energy & Fuels; Environmental  
 Sciences & Ecology  
 GA CS0FX  
 UT WOS:000361734800009  
 DA 2018-05-03  
 ER

PT J  
 AU Jridi, O  
 Bargaoui, SA  
 Nouri, FZ  
 AF Jridi, Omar  
 Bargaoui, Saoussen Aguir  
 Nouri, Fethi Zouheir

TI Household preferences for energy saving measures: Approach of discrete  
 choice models

SO ENERGY AND BUILDINGS

LA English

DT Article

DE Rationality; Heterogeneity; Buildings; Discrete choice models; Energy  
 policy

ID MULTINOMIAL LOGIT MODEL; WILLINGNESS-TO-PAY; SPECIFICATION TESTS; MARKET  
 FAILURES; EFFICIENCY GAP; CONSERVATION; POLICY; DETERMINANTS; BEHAVIOR;  
 INVESTMENTS

AB The aim of this paper is crystallized around the research of the energy saving measures adoption's  
 determinants in the residential sector. Using data from the latest survey of the Tunisian Company of  
 Electricity and Gas, we study the specifications of discrete choice models to the characteristics of three  
 different electrical purposes: the Solar Water Heaters, the Low-Energy Bulbs and the classes of energy  
 efficient refrigerators. The results suggest the strong heterogeneity of households, making the effect of  
 energy policies a bit obvious. However, by adopting a perfect rationality, these households give  
 importance to the enrichment of electricity prices and gains in energy savings, as far as the importance of  
 the changes in equipments' price. Subsequently, we urge policy makers to create mechanisms of balancing  
 the grants of conventional energies by increasing the grants on energy efficient equipments' purchasing  
 prices. (C) 2015 Elsevier B.V. All rights reserved.

C1 [Jridi, Omar; Bargaoui, Saoussen Aguir] Tunis ELMANAR Univ, Fac Econ Sci & Management, Lab Res  
 Appl Microecon LARMA, El Manar li 2092, Tunisia.

[Nouri, Fethi Zouheir] Tunis Univ, LARMA, High Sch Econ Sci & Commercials, Montfleury 1089, Tunisia.

RP Jridi, O (reprint author), 29 St Essanaouber Alward City, Oued Ellil Manouba 2021, Tunisia.

EM jridi.omar@yahoo.fr; aguir\_saoussen@yahoo.fr; fethinouri@yahoo.fr

FU Tunis El MANAR University

FX This research was financed by Tunis El MANAR University. Special thanks to the laboratory of research in applied microeconomics (LARMA) and the direction of study and planning of the Tunisian Company of Electricity and Gas for their supports in the data collection process.

- CR Abrahamse W, 2005, J ENVIRON PSYCHOL, V25, P273, DOI 10.1016/j.jenvp.2005.08.002  
 Anderson ST, 2004, RESOUR ENERGY ECON, V26, P27, DOI 10.1016/j.reseneeco.2003.07.001  
 Austin O, 2012, ELIXIR INT J, V51, P11159  
 Banfi S, 2008, ENERG ECON, V30, P503, DOI 10.1016/j.eneco.2006.06.001  
 Bogdon AS, 1996, J HOUS ECON, V5, P323, DOI 10.1006/jhec.1996.0017  
 CAMERON TA, 1985, REV ECON STAT, V67, P205, DOI 10.2307/1924719  
 Diaz-Rainey L., 2009, DOMESTIC ENERGY EFFI  
 [Anonymous], 2010, REP STEG 6 ENQ AUPR  
 Gamtessa SF, 2013, ENERG BUILDINGS, V57, P155, DOI 10.1016/j.enbuild.2012.11.006  
 Gillingham K, 2009, ANNU REV RESOUR ECON, V1, P597, DOI 10.1146/annurev.resource.102308.124234  
 Grosche P, 2009, ENERG J, V30, P135  
 HASSETT KA, 1995, J PUBLIC ECON, V57, P201, DOI 10.1016/0047-2727(94)01452-T  
 HAUSMAN J, 1984, ECONOMETRICA, V52, P1219, DOI 10.2307/1910997  
 HAUSMAN JA, 1987, J ECONOMETRICS, V34, P83, DOI 10.1016/0304-4076(87)90068-6  
 HIRST E, 1990, RESOUR CONSERV RECY, V3, P267, DOI 10.1016/0921-3449(90)90023-W  
 JAFFE AB, 1994, ENERG POLICY, V22, P804, DOI 10.1016/0301-4215(94)90138-4  
 Jaffe AB, 2005, ECOL ECON, V54, P164, DOI 10.1016/j.ecolecon.2004.12.027  
 Kenneth A.S., 1985, INT ECON REV, V26, P619  
 Kwak SY, 2010, ENERG POLICY, V38, P673, DOI 10.1016/j.enpol.2009.09.022  
 LEVINE MD, 1995, ANNU REV ENERG ENV, V20, P535  
 Mahapatra K, 2008, ENERG POLICY, V36, P577, DOI 10.1016/j.enpol.2007.10.006  
 MCFADDEN D, 1987, J ECONOMETRICS, V34, P63, DOI 10.1016/0304-4076(87)90067-4  
 McFadden D., 1981, STRUCTURAL ANAL DISC  
 Metcalf GE, 1999, REV ECON STAT, V81, P516, DOI 10.1162/003465399558274  
 Nair G, 2010, ENERG POLICY, V38, P2956, DOI 10.1016/j.enpol.2010.01.033  
 Poortinga W, 2003, J ECON PSYCHOL, V24, P49, DOI 10.1016/S0167-4870(02)00154-X  
 Popp D, 2012, ENERG ECON, V34, P980, DOI 10.1016/j.eneco.2011.07.001  
 POTEPAN MJ, 1989, J URBAN ECON, V25, P282, DOI 10.1016/0094-1190(89)90051-X  
 Rehdanz K, 2007, ENERG ECON, V29, P167, DOI 10.1016/j.eneco.2006.04.002  
 Thisse J.F., 1995, REV EC, V46, P921  
 Train K, 2002, DISCRETE CHOICE METH  
 Wang ZH, 2012, APPL ENERG, V91, P235, DOI 10.1016/j.apenergy.2011.09.002  
 Wang ZH, 2011, ENERG POLICY, V39, P3550, DOI 10.1016/j.enpol.2011.03.055  
 Weil S., 2003, ENERG POLICY, V31, P1403  
 Wen CH, 2001, TRANSPORT RES B-METH, V35, P627, DOI 10.1016/S0191-2615(00)00045-X  
 Yue T, 2013, ENERG POLICY, V62, P665, DOI 10.1016/j.enpol.2013.07.051

NR 36

TC 5

Z9 5

U1 1

U2 20

PU ELSEVIER SCIENCE SA

PI LAUSANNE

PA PO BOX 564, 1001 LAUSANNE, SWITZERLAND

SN 0378-7788

EI 1872-6178

J9 ENERG BUILDINGS

JI Energy Build.

PD SEP 15

PY 2015

VL 103

BP 38

EP 47

DI 10.1016/j.enbuild.2015.06.013

PG 10

WC Construction & Building Technology; Energy & Fuels; Engineering, Civil

SC Construction & Building Technology; Energy & Fuels; Engineering

GA CS0SZ

UT WOS:000361773800004

DA 2018-05-03

ER

PT J

AU Sesana, MM

Cuca, B

Iannaccone, G

Brumana, R

Caccavelli, D

Gay, C

AF Sesana, Marta Maria

Cuca, Branka

Iannaccone, Giuliana

Brumana, Raffaella

Caccavelli, Dominique

Gay, Charly

TI Geomapping methodology for the GeoCluster Mapping Tool to assess deployment potential of technologies for energy efficiency in buildings

SO SUSTAINABLE CITIES AND SOCIETY

LA English

DT Article

DE Energy efficiency; Geocluster methodology; Building technologies

ID CLUSTER-ANALYSIS; DECISION-MAKING; POLICY; SYSTEMS; REQUIREMENTS; INFORMATION

AB Energy efficiency in buildings will play a major role in responding to EU climate change and energy-saving policies, if sustainable actions are to be triggered at large scale involving EU, all Member States and their regional and local authorities.

The objective of this paper is to explain the Geocluster methodology developed within the European "GE20" project aimed at developing a general framework for the assessment of the effectiveness of building technologies for energy efficiency. The research aimed to locate similarities across the EU countries by combining parameters and indicators structures in homogeneous layers and sub-layers (i.e. building technology, context, policies and regulations, climatic conditions, social aspects) in order to develop a repository to be used as source of data for a dynamic geo-database web service. The assessment has been performed on two selected technologies, thermal insulation for envelope retrofitting and solar cooling, respectively, for two pilot areas: Benelux and Mediterranean arc. The final goal was to create an Open Source geo-portal named GeoCluster Mapping Tool, based on international standards in the GIS domain, which implements the methodology developed and becomes a decision-making tool for private or public parties. (C) 2015 Elsevier Ltd. All rights reserved.

C1 [Sesana, Marta Maria; Cuca, Branka; Iannaccone, Giuliana; Brumana, Raffaella] Politecn Milan, Dept Architecture Built Environm & Construct Engr, I-20133 Milan, Italy.

[Cuca, Branka] Cyprus Univ Technol, CY-3036 Limassol, Cyprus.

[Caccavelli, Dominique; Gay, Charly] CSTB, F-06904 Sophia Antipolis, France.

RP Sesana, MM (reprint author), Politecn Milan, Dept Architecture Built Environm & Construct Engr, Via Ponzio 31, I-20133 Milan, Italy.

EM marta.sesana@polimi.it

OI Sesana, Marta Maria/0000-0002-5177-1863; Iannaccone,

Giuliana/0000-0002-8804-5734

FU European Community [285501]

FX The research leading to these results has received funding from the European Community's Seventh Framework Programme (FP7), Subprogramme, EeB,NMP,201-1-4 - Geo-clusters approach to support European energy-efficiency goals, under grant agreement no 285501,

- CR Amini M., 2005, GEODERMA, V124, P223
- Andersson B., 1985, ASHRAE T 2, V91
- Antonelli C., 1994, INT REV APPL EC, V8, P18
- ASIEPI Project, ASS IMPR EPBD IMP
- Brass D. J., 2004, ACAD MANAGE J, V47, P785
- Calvert K, 2013, RENEW SUST ENERG REV, V18, P416, DOI 10.1016/j.rser.2012.10.024
- Cannemi M, 2014, ENER POLICY, V67, P127, DOI 10.1016/j.enpol.2013.12.011
- Cooke P, 1998, ENVIRON PLANN A, V30, P1563, DOI 10.1068/a301563
- Cooke P., 1997, RES POLICY, V26, P427
- Cuca B, 2014, CENT EUR J GEOSCI, V6, P121, DOI 10.2478/s13533-012-0165-0
- Delic M., 2006, INT SCI DAYS 2006 CO
- European Commission, 2013, COM20130169 EUR COMM
- Florida F., 1995, FUTURES, V27, P527
- FOVELL RG, 1993, J CLIMATE, V6, P2103, DOI 10.1175/1520-0442(1993)006<2103:CZOTCU>2.0.CO;2
- Freeman D., 1995, CAMBRIDGE J ECON, V19, P5
- Gaitani N, 2010, APPL ENER, V87, P2079, DOI 10.1016/j.apenergy.2009.12.007
- Gomez-Munoz VM, 2002, RENEW ENER, V25, P171, DOI 10.1016/S0960-1481(01)00013-1
- Grun A., 2013, INT SOC PHOTOGRAMMET
- Hackl R, 2013, APPL ENER, V112, P1500, DOI 10.1016/j.apenergy.2013.03.083
- Hadley D. L., 1993, P CLIMA 2000 C NOV 1
- Hazewinkel M., 1994, ENCY MATH
- Hernandez P, 2010, ENER BUILDINGS, V42, P815, DOI 10.1016/j.enbuild.2009.12.001
- [Anonymous], 2008, EN EFF REQ BUILD COD
- Jackson MO, 2008, SOCIAL AND ECONOMIC NETWORKS, P1
- Jain AK, 1999, ACM COMPUT SURV, V31, P264, DOI 10.1145/331499.331504
- Janda K., 1999, P ECEEE SUMM STUD CO, P485
- Kapsalaki M, 2012, ENER BUILDINGS, V55, P765, DOI 10.1016/j.enbuild.2012.10.022
- Kaymak U, 2002, IEEE T FUZZY SYST, V10, P705, DOI 10.1109/TFUZZ.2002.805901
- Reynolds T. S., 1997, TECHNOLOGY W HIST AN
- Kwakkel J H, 2012, TECHNOLOGICAL FORECA, V81, P67
- Praessler S., 2011, ENER POLICY, V39, P4876
- Lundvall Bengt-ake, 1994, J IND STUDIES, V1, P23, DOI DOI 10.1080/13662719400000002
- Mans P, 2008, ENER POLICY, V36, P1375, DOI 10.1016/j.enpo1.2007.12.004
- Marshall A, 1920, PRINCIPLES EC
- Marshall Alfred, 1919, IND TRADE
- Michalena E, 2012, ENER POLICY, V45, P201, DOI 10.1016/j.enpol.2012.02.021
- Mulder K, 2011, WHAT IS SUSTAINABLE TECHNOLOGY?: PERCEPTIONS, PARADOXES AND POSSIBILITIES, P1
- Dante V., 2007, P ISPRS 5 INT S MOBS
- Nelson E. R., 1993, COMP ANAL
- OLIVER JE, 1991, PHYS GEOGR, V12, P231
- Penn BS, 2005, COMPUT GEOSCI-UK, V31, P531, DOI 10.1016/j.cageo.2004.10.009
- Perez-Lombard L, 2008, ENER BUILDINGS, V40, P394, DOI 10.1016/j.enbuild.2007.03.007
- Petcharat S, 2012, ENER BUILDINGS, V52, P145, DOI 10.1016/j.enbuild.2012.06.006
- Porter M. E., 1990, COMPETITIVE ADVANTAG
- Raikes P, 2000, ECON SOC, V29, P390
- Sesana MM, 2013, BUILD ENVIRON, V67, P211, DOI 10.1016/j.buildenv.2013.05.022
- Sousa J. M., 2002, FUZZY DECISION MAKIN
- Suetterlin B., 2011, ENER POLICY, V39, P8137
- Tutmez B., 2009, IFSA EUSFLAT 2009 LI, P351
- Tutmez B, 2012, COMPUT GEOSCI-UK, V43, P34, DOI 10.1016/j.cageo.2012.02.019
- Uhlenkuken C, 2000, COMPUT GEOSCI, V26, P77, DOI 10.1016/S0098-3004(99)00035-7
- Wiedenhofer D, 2013, ENER POLICY, V63, P696, DOI 10.1016/j.enpol.2013.07.035
- WONG P, 2001, SOFT COMPUTING RESER
- Yu L., 2011, DEV GUIDE SEMANTIC W
- [Anonymous], 2013, COM2013698

Z9 5  
 U1 0  
 U2 7  
 PU ELSEVIER SCIENCE BV  
 PI AMSTERDAM  
 PA PO BOX 211, 1000 AE AMSTERDAM, NETHERLANDS  
 SN 2210-6715  
 J9 SUSTAIN CITIES SOC  
 JI Sust. Cities Soc.  
 PD SEP  
 PY 2015  
 VL 17  
 BP 22  
 EP 34  
 DI 10.1016/j.scs.2015.02.006  
 PG 13  
 WC Construction & Building Technology; GREEN & SUSTAINABLE SCIENCE &  
 TECHNOLOGY; Energy & Fuels  
 SC Construction & Building Technology; Science & Technology - Other Topics;  
 Energy & Fuels  
 GA CZ9DA  
 UT WOS:000367396800003  
 DA 2018-05-03  
 ER

PT J  
 AU Yang, S  
 Shipworth, M  
 Huebner, G  
 AF Yang, Shu  
 Shipworth, Michelle  
 Huebner, Gesche  
 TI His, hers or both's? The role of male and female's attitudes in  
 explaining their home energy use behaviours  
 SO ENERGY AND BUILDINGS  
 LA English  
 DT Article  
 DE Couples' attitudes; Home heating usage; Maximum temperature; Heating  
 duration

ID THERMAL COMFORT; INTERNAL TEMPERATURES; GENDER-DIFFERENCES; CONSUMPTION;  
 SPACE; DETERMINANTS; CONSERVATION; HOUSEHOLDS; KNOWLEDGE; ENGLAND

AB Building energy research has historically overlooked the role of attitudes, instead focusing on building and socio-demographic influences. Even when attitudes are measured, usually, the attitudes of just one household member are measured even though household energy consumption is the result of actions of all household members. This research explored first whether attitudes could help explain heating usage and second whether the attitudes of a couple could explain more of the variability in heating behaviour than the attitudes of one partner. The attitudes towards home heating energy use (i.e. attitudes towards thermal comfort, economical with energy, industry and technology's role and individual's role) of 128 English couples were used in this study. Together with building and socio-demographics, attitudes were examined to explain heating temperatures and durations, which were derived from temperature sensors placed in the homes in 2007-2008. The results showed that attitudes helped explain heating temperatures and durations, even when building and socio-demographic variables were controlled. Economical with energy was the most highly identified influence on heating behaviours, with thermal comfort a close second. In households that included a couple, combined attitudes of both partners explained heating usage behaviours more accurately than the attitudes of either male or female only. Crown Copyright (C) 2015 Published by Elsevier B.V. This is an open access article under the CC BY-NC-ND license (<http://creativecommons.org/licenses/by-nc-nd/4.0/>).

C1 [Yang, Shu] Univ Sci & Technol China, Sch Management, Hefei 230026, Anhui, Peoples R China.

[Yang, Shu; Shipworth, Michelle; Huebner, Gesche] UCL, UCL Energy Inst, London WC1H 0NN, England.

RP Yang, S (reprint author), Univ Sci & Technol China, Sch Management, Hefei 230026, Anhui, Peoples R China.

EM ysazure@mail.ustc.edu.cn; m.shipworth@ucl.ac.uk; g.huebner@ucl.ac.uk

OI Huebner, Gesche/0000-0002-1304-4366

FU Carbon Trust [GR/S94377/01]; EPSRC [GR/S94377/01]; China Scholarship Council (CSC); University College London

FX The data is drawn from the CaRB Home Energy Survey conducted as part of the Carbon Reduction in Buildings project (GR/S94377/01), which was jointly funded by the Carbon Trust and the EPSRC. The authors would like to thank David Shipworth, Kevin Lomas, Steven Firth, Andrew Wright, and Mike Gentry for their contributions in creating the data set. We would also like to thank the China Scholarship Council (CSC) and University College London for the UCL-CSC Research Student Visit Award that funded the first author's year as a visiting PhD student at the UCL Energy Institute.

- CR Abrahamse W, 2009, J ECON PSYCHOL, V30, P711, DOI 10.1016/j.joep.2009.05.006  
 ASHRAE, 2010, THERM ENV COND HUM O  
 Base S.S., 2010, IBM SPSS STAT 19 COR  
 BECKER LJ, 1981, ENVIRON BEHAV, V13, P590, DOI 10.1177/0013916581135004  
 Chen H, 2014, APPL ENERG, V116, P376, DOI 10.1016/j.apenergy.2013.11.027  
 Critchley R, 2007, APPL ENERG, V84, P147, DOI 10.1016/j.apenergy.2006.06.001  
 EHCS English House Condition Survey, 1996, ENGLISH HOUSE CONDIT  
 Elmhurst Energy Systems M.C.a.N.E.S, 2006, RED DAT SAP COLL DAT  
 Gill L., 2001, NATL STAT METHODOLOG  
 Griffiths I.D., 1987, HUMAN FACTORS DOMEST  
 Griffiths I.D., 1986, L ESRC END GRANT REP  
 Herzog T. N., 2007, DATA QUALITY RECORD, V1  
 Hong SH, 2006, ENERG BUILDINGS, V38, P1171, DOI 10.1016/j.enbuild.2006.01.007  
 Huebner GM, 2013, ENERG BUILDINGS, V66, P688, DOI 10.1016/j.enbuild.2013.07.025  
 Huebner GM, 2013, ENERG BUILDINGS, V66, P626, DOI 10.1016/j.enbuild.2013.07.043  
 Jorgensen B.S., 2013, ENVIRON BEHAV  
 Karjalainen S, 2007, BUILD ENVIRON, V42, P1594, DOI 10.1016/j.buildenv.2006.01.009  
 Karpiak CP, 2008, J ENVIRON PSYCHOL, V28, P203, DOI 10.1016/j.jenvp.2007.12.001  
 Kelly S, 2013, APPL ENERG, V102, P601, DOI 10.1016/j.apenergy.2012.08.015  
 Kim H., 2011, EXPLORING GENDER DIF  
 MIDDEN CJH, 1983, J ECON PSYCHOL, V4, P37, DOI 10.1016/0167-4870(83)90017-X  
 National Statistics, 2004, HARM CONC QUEST SOC  
 National Statistics, 2009, SOC TRENDS 39  
 Newton P, 2013, SUSTAINABILITY-BASEL, V5, P1211, DOI 10.3390/su5031211  
 Oreszczyn T, 2006, ENERG BUILDINGS, V38, P245, DOI 10.1016/j.enbuild.2005.06.006  
 Ormandy D, 2012, ENERG POLICY, V49, P116, DOI 10.1016/j.enpol.2011.09.003  
 Pagiaslis A, 2014, PSYCHOL MARKET, V31, P335, DOI 10.1002/mar.20698  
 Palmer J., 2013, APPL ENERG, P145  
 Ping XG, 2012, ENERG POLICY, V51, P828, DOI 10.1016/j.enpol.2012.09.030  
 Reinard J. C., 2006, COMMUNICATION RES ST  
 SAMUELSON CD, 1991, J APPL SOC PSYCHOL, V21, P549, DOI 10.1111/j.1559-1816.1991.tb00536.x  
 Santin OG, 2009, ENERG BUILDINGS, V41, P1223, DOI 10.1016/j.enbuild.2009.07.002  
 Schuler A, 2000, ENERG POLICY, V28, P877, DOI 10.1016/S0301-4215(00)00074-4  
 SELIGMAN C, 1983, ADV CONSUM RES, V10, P647  
 SELIGMAN C, 1979, J APPL SOC PSYCHOL, V9, P70, DOI 10.1111/j.1559-1816.1979.tb00795.x  
 Shipworth M, 2010, BUILD RES INF, V38, P50, DOI 10.1080/09613210903263007  
 Smithson M., 2013, GEN LINEAR MODELS CA  
 van Hoof J, 2010, FRONT BIOSCI-LANDMRK, V15, P765, DOI 10.2741/3645  
 Vuong Q.H., 1989, ECONOMETRICA, V57  
 Xenias D, 2013, TRANSPORT RES A-POL, V48, P75, DOI 10.1016/j.tra.2012.10.007  
 Zelezny LC, 2000, J SOC ISSUES, V56, P443, DOI 10.1111/0022-4537.00177

NR 41  
 TC 5  
 Z9 5  
 U1 1  
 U2 14  
 PU ELSEVIER SCIENCE SA  
 PI LAUSANNE  
 PA PO BOX 564, 1001 LAUSANNE, SWITZERLAND  
 SN 0378-7788  
 EI 1872-6178  
 J9 ENERGBUILDINGS  
 JI Energy Build.  
 PD JUN 1  
 PY 2015  
 VL 96  
 BP 140  
 EP 148  
 DI 10.1016/j.enbuild.2015.03.009  
 PG 9  
 WC Construction & Building Technology; Energy & Fuels; Engineering, Civil  
 SC Construction & Building Technology; Energy & Fuels; Engineering  
 GA CL8JZ  
 UT WOS:000357222300013  
 OA gold  
 DA 2018-05-03  
 ER

PT J  
 AU Hosgor, E  
     Fischbeck, PS  
 AF Hosgoer, Enes  
     Fischbeck, Paul S.  
 TI Virtual home energy auditing at scale: Predicting residential energy  
     efficiency using publicly available data  
 SO ENERGY AND BUILDINGS  
 LA English  
 DT Article  
 DE Residential; Energy efficiency; Predictive modeling; PRISM; Publicly  
     available data  
 ID LOW-INCOME; ELECTRICITY; CONSERVATION; BUILDINGS; RETROFIT; BEHAVIOR;  
     POLICY

AB In this study we model and examine the energy efficiency profile of individual single-family houses from Gainesville, Florida, in our sample (n = 7091). For this we use Princeton Scorekeeping Method (PRISM) which processes historical weather data and monthly utility usage data as inputs using an iterative regression approach to compute three energy efficiency parameters: (1) baseload consumption for enduses which do not change with weather, e.g., lighting, refrigerator, water heater; (2) heating/cooling slope which is a function of the building shell insulation and the efficiency of the heating/cooling unit; (3) reference temperature, i.e., the outside temperature at which the house turns on heating/cooling. These parameters make up the normalized annual consumption (NAC). We then proceed to regress these parameters against the publicly available data to study the extent we can extract statistical insight for residential energy efficiency profiling using publicly available information (n = 5243). These regression models are to pave a path to creating energy efficiency "reservoir maps" across individual homes and reducing the information barrier to energy efficiency adoption. (C) 2015 Elsevier B.V. All rights reserved.

C1 [Hosgoer, Enes; Fischbeck, Paul S.] Carnegie Mellon Univ, Dept Engr & Publ Policy, Pittsburgh, PA 15232 USA.

[Hosgoer, Enes] EEme LLC, Pittsburgh, PA USA.

RP Hosgor, E (reprint author), Carnegie Mellon Univ, Engr & Publ Policy, Pittsburgh, PA 15232 USA.

EM enes@energyefficiency.me

FU EEme; LLC; Carnegie Mellon University

FX We would like to thank Nick Taylor, Hal Knowles and Pierce Jones with Program for Resource Efficient Communities (PREC) at University of Florida for sharing the utility and publicly available data that underlie this work, and for providing support. Additionally, we are grateful for the advice and domain guidance given by Alan Meier with Lawrence Berkeley National Laboratory, and by Arthur A. Boni, William F. Eddy and H. Scott Matthews with Carnegie Mellon University. Finally, we extend our gratitude to EEme, LLC, a spin-out from Carnegie Mellon University, for sponsoring this research.

CR Ben H, 2014, ENER G BUILDINGS, V80, P120, DOI 10.1016/j.enbuild.2014.05.019  
 Birt BJ, 2012, ENER G BUILDINGS, V50, P93, DOI 10.1016/j.enbuild.2012.03.025  
 Bradshaw JL, 2014, ENER G BUILDINGS, V69, P535, DOI 10.1016/j.enbuild.2013.11.035  
 Brecha RJ, 2011, ENER G POLICY, V39, P2982, DOI 10.1016/j.enpol.2011.03.011  
 Brown M., 1993, ORNLCON373  
 Carlson DR, 2013, ENER G BUILDINGS, V64, P132, DOI 10.1016/j.enbuild.2013.04.005  
 Dutt G., 1989, KEEPING SCORE ELECT, P353  
 Fels M., 1992, 933 NYSERDA  
 Fels M.F., 1986, PRISM INTRO, P08544  
 Goldberg M., 1982, THESIS PRINCETON U P  
 GOLDMAN CA, 1986, ENER G BUILDINGS, V9, P89, DOI 10.1016/0378-7788(86)90010-1  
 Goldstein K, 2014, ENER G BUILDINGS, V80, P556, DOI 10.1016/j.enbuild.2014.03.068  
 Gregory J., 1987, OHIO HOME WEATHERIZA  
 Haberl J.S., 1989, P 6 ANN S IMPR EN EF  
 HIRST E, 1986, ENER G BUILDINGS, V9, P45, DOI 10.1016/0378-7788(86)90006-X  
 Institute for Electric Innovation, 2013, SUMM CUST FUND EL EF  
 JAFFE AB, 1994, ENERGY J, V15, P43  
 Kavousian A, 2013, ENERGY, V55, P184, DOI 10.1016/j.energy.2013.03.086  
 Laurent M.H., 2013, ECEEE SUMM STUD P 20  
 Lee YS, 2014, ENER G BUILDINGS, V69, P407, DOI 10.1016/j.enbuild.2013.11.020  
 Mills E., 1987, ENERGY AUDITOR R NOV, P27  
 Ndiaye D, 2011, ENER G BUILDINGS, V43, P446, DOI 10.1016/j.enbuild.2010.10.008  
 Pisello AL, 2014, APPL ENER G, V133, P224, DOI 10.1016/j.apenergy.2014.07.049  
 Rishee J.E.T., 2013, ENERGY BUILD, V64, P408  
 RODBERG LS, 1986, ENER G BUILDINGS, V9, P55, DOI 10.1016/0378-7788(86)90007-1  
 Sciortino M., 2011, ENERGY EFFICIENCY RE  
 The National Academies Press, 2010, REAL PROSPECTS ENER G

NR 27

TC 5

Z9 5

U1 0

U2 13

PU ELSEVIER SCIENCE SA

PI LAUSANNE

PA PO BOX 564, 1001 LAUSANNE, SWITZERLAND

SN 0378-7788

EI 1872-6178

J9 ENER G BUILDINGS

JI Energy Build.

PD APR 1

PY 2015

VL 92

BP 67

EP 80

DI 10.1016/j.enbuild.2015.01.037

PG 14

WC Construction & Building Technology; Energy & Fuels; Engineering, Civil

SC Construction & Building Technology; Energy & Fuels; Engineering



GA CE4FQ  
 UT WOS:000351786900007  
 DA 2018-05-03  
 ER

PT J

AU Petri, I

Rezgui, Y

Beach, T

Li, HJ

Arnesano, M

Revel, GM

AF Petri, Ioan

Rezgui, Yacine

Beach, Tom

Li, Haijiang

Arnesano, Marco

Revel, Gian Marco

TI A semantic service-oriented platform for energy efficient buildings

SO CLEAN TECHNOLOGIES AND ENVIRONMENTAL POLICY

LA English

DT Article

DE Sustainability; Energy efficiency; Service-oriented computing;

Construction; Buildings; Energy optimisation

ID CLIMATE-CHANGE; BEHAVIOR

AB The construction industry is under pressure to increase the sustainability of its practices to meet UK commitments for reducing energy consumption and alleviating climate change. The research uses a mixed-method approach drawn from recent studies to explore the readiness, maturity and level of engagement of construction stakeholders in adopting the UK government sustainability agenda. Limited positive energy practices and sustainability regulatory awareness, combined with information provision deficiencies, form some of the key barriers to sustainable construction faced by industry. A service-oriented platform that provides integrated access to sustainability resources in the form of interactive, dynamic and user-oriented services that fully exploit latest advances in computing technologies is proposed to address these barriers. In this paper, we specifically elaborate on how a service-oriented system can be efficiently used for performing (near) real-time energy optimisation in buildings, greatly contributing to engaging construction stakeholders with sustainability practices. The solution disseminates energy efficient practices and provides support for building managers in implementing energy efficient optimisation plans. The solution is tested and validated through a number of energy efficiency scenarios developed as part of the EU FP7 SportE2 project.

C1 [Petri, Ioan] Cardiff Univ, Sch Comp Sci & Informat, Cardiff CF24 3AA, S Glam, Wales.

[Rezgui, Yacine; Beach, Tom; Li, Haijiang] Cardiff Univ, Sch Engr, Cardiff CF24 3AA, S Glam, Wales.

[Arnesano, Marco; Revel, Gian Marco] Univ Politecn Marche, Dipartimento Ingn Ind & Sci Matemat, I-60131 Ancona, Italy.

RP Petri, I (reprint author), Cardiff Univ, Sch Comp Sci & Informat, Cardiff CF24 3AA, S Glam, Wales.

EM petrii@cardiff.ac.uk; rezguiy@cardiff.ac.uk; beachth@cardiff.ac.uk;

lih@cardiff.ac.uk; m.arnesano@univpm.it; gm.revel@univpm.it

RI Petri, Ioan/E-6136-2017

OI Petri, Ioan/0000-0002-1625-8247; Beach, Thomas/0000-0001-5610-8027;

Revel, Gian Marco/0000-0002-3372-7543; ARNESANO,

MARCO/0000-0003-1700-3075; Rezgui, Yacine/0000-0002-5711-8400

FU European Commission under the FP7 SportE2 Grant; Welsh Government under the Academic Expertise for Business (A4B) programme

FX The European-wide study was funded by the European Commission under the

FP7 SportE2 Grant. The initial Wales study and the follow-up 'SCRIPT'

Project were funded by the Welsh Government under the Academic Expertise

for Business (A4B) programme. The authors would also like to acknowledge

the many industrial/stakeholder organisations and individuals who have

kindly taken part in the various studies.

CR Blake DE, 2001, ENVIRON BEHAV, V33, P708, DOI 10.1177/00139160121973205  
BSRIA, 2011, ZER CARB TARG CONSTR  
Burgess J, 2008, ENER POLICY, V36, P4454, DOI 10.1016/j.enpol.2008.09.039  
Clarke JA, 2008, ENER POLICY, V36, P4605, DOI 10.1016/j.enpol.2008.09.004  
de Bruijn J, 2005, COMMUN ACM, V48, P43, DOI 10.1145/1101779.1101807  
DEFRA, 2002, SURV PUBL ATT QUAL L  
Digest of UK Energy Statistics, 2008, DIG UK EN STAT  
Egemen M., 2005, Journal of Civil Engineering and Management, V11, P267  
HM Government, 2010, LOW CARB CONSTR INN  
Hug F, 2014, CLEAN TECHNOL ENVIR, V6, P138  
IPCC, 2007, CONTRIBUTION WORKING  
\*IPCC, 2001, CLIM CHANG 2001  
Kolmuss A., 2002, ENVIRON EDUC RES, V8, P239, DOI DOI 10.1080/13504620220145401  
Lill I, 2009, TECHNOL ECON DEV ECO, V15, P540, DOI 10.3846/1392-8619.2009.15.540-560  
Lorenzoni I, 2007, GLOBAL ENVIRON CHANG, V17, P445, DOI 10.1016/j.gloenvcha.2007.01.004  
Martinaitis V, 2006, J CIV ENG MANAG, V12, P1  
Morgan M. G., 2002, RISK COMMUNICATION M  
MPA-The Concrete Centre, 2011, OP EMB CO2  
Norton A., 2004, DAY TOMORROW PUBLIC  
Oates B., 2006, RES INFORM SYSTEMS C  
Rezgui Y, 2011, HARVESTING AND MANAGING KNOWLEDGE IN CONSTRUCTION: FROM  
THEORETICAL FOUNDATIONS TO BUSINESS APPLICATIONS, P1  
Rezgui Y, 2010, ADV ENG INFORM, V24, P340, DOI 10.1016/j.aei.2010.02.001  
Rezgui Y, 2010, ADV ENG INFORM, V24, P219, DOI 10.1016/j.aei.2009.12.001  
Rip A, 1998, HUMAN CHOICE CLIMATE  
Saidur R, 2011, CLEAN TECHNOL ENVIR, V13, P103, DOI 10.1007/s10098-009-0275-7  
Schellnhuber HJ, 2006, AVOIDING DANGEROUS C  
Smith A, 2005, RES POLICY, V34, P1491, DOI 10.1016/j.respol.2005.07.005  
Stern PC, 2000, J SOC ISSUES, V56, P407, DOI 10.1111/0022-4537.00175  
Teixeira J. M. C., 2006, Journal of Civil Engineering and Management, V12, P237  
Kuechler W., 2011, DESIGN SCI RES INFOR  
Vakola M, 2004, TEAM PERFORMANCE MAN, V10, P112, DOI DOI 10.1108/13527590410556836  
van Vliet B, 2005, INFRASTRUCTURES CONS  
WAG, 2011, SUST BUILD WAL BREEA  
Whitmarsh L., 2009, 132 TYND  
Whitmarsh L, 2011, GLOBAL ENVIRON CHANG, V21, P56, DOI 10.1016/j.gloenvcha.2010.07.011  
Lichtenstein S, 2006, CONSTRUCTION OF PREFERENCE, P1, DOI 10.2277/ 0521542200  
[Anonymous], 2005, CHALL CHANG EUR BUIL

NR 37  
TC 5  
Z9 5  
U1 1  
U2 12  
PU SPRINGER  
PI NEW YORK  
PA 233 SPRING ST, NEW YORK, NY 10013 USA  
SN 1618-954X  
EI 1618-9558  
J9 CLEAN TECHNOL ENVIR  
JI Clean Technol. Environ. Policy  
PD MAR  
PY 2015  
VL 17  
IS 3  
BP 721  
EP 734  
DI 10.1007/s10098-014-0828-2  
PG 14

WC GREEN & SUSTAINABLE SCIENCE & TECHNOLOGY; Engineering, Environmental;  
Environmental Sciences

SC Science & Technology - Other Topics; Engineering; Environmental Sciences  
& Ecology

GA CE0EN

UT WOS:000351477400013

DA 2018-05-03

ER

PT S

AU Chin, J

Lin, SC

AF Chin, Jacky

Lin, Shu-Chiang

BE Bordea, G

TI Investigating Users' Perspectives in Building Energy Management System  
with an extension of Technology Acceptance Model: A Case Study in  
Indonesian Manufacturing Companies

SO THIRD INFORMATION SYSTEMS INTERNATIONAL CONFERENCE 2015

SE Procedia Computer Science

LA English

DT Proceedings Paper

CT 3rd Information Systems International Conference

CY NOV 02-04, 2015

CL Surabaya, INDONESIA

DE Building Energy Management System; Technology Acceptance Model;  
Structural Equation Modeling

ID OPTIMIZATION; EFFICIENCY

AB This study investigates factors that may influence users' perspectives in utilizing energy management system. An extended model of the Technology Acceptance Model (TAM) with two external factors, compatibility (C) and technology complexity (TC), was developed to evaluate the implementation of the Building Energy Management System (BEMS) in Indonesia's manufacturing industries. 258 questionnaires were analyzed via the structural equation modeling and the result shows that both C and TC influence user's intention to use BEMS through the user's attitude, perceived usefulness and perceived ease of use. The findings can be served as guidelines for design improvements of similar energy management systems. (C) 2015 The Authors. Published by Elsevier B.V.

C1 [Chin, Jacky; Lin, Shu-Chiang] Natl Taiwan Univ Sci & Technol, Dept Ind Management, 43 Keelung Rd, Sect 4, Taipei 106, Taiwan.

RP Lin, SC (reprint author), Natl Taiwan Univ Sci & Technol, Dept Ind Management, 43 Keelung Rd, Sect 4, Taipei 106, Taiwan.

EM slin@mail.ntust.edu.tw

OI chin, Jacky/0000-0003-0378-1298

CR Ajzen I., 1980, UNDERSTANDING ATTITU

Aslam W, 2015, RENEW SUST ENERG REV, V44, P933, DOI 10.1016/j.rser.2015.01.004

Chou JS, 2014, APPL ENERG, V128, P336, DOI 10.1016/j.apenergy.2014.04.083

DAVIS FD, 1989, MANAGE SCI, V35, P982, DOI 10.1287/mnsc.35.8.982

Figueiredo J, 2012, ENERG BUILDINGS, V49, P85, DOI 10.1016/j.enbuild.2012.01.041

Fong KF, 2006, ENERG BUILDINGS, V38, P220, DOI 10.1016/j.enbuild.2005.05.008

Fung C., 2010, POW EN SOC GEN M 201

Hooper D., 2008, STRUCTURAL EQUATION, P2

Hyo-Jeong Kim, 2009, International Journal of Accounting Information Systems, V10, P214, DOI 10.1016/j.accinf.2009.09.001

Introna V., 2014, INT J CLEANER PRODUC, V83, P108, DOI DOI 10.1016/J.JDEPR0.2014.07.001

Lowry G, 2002, AUTOMAT CONSTR, V11, P695, DOI 10.1016/S0926-5805(02)00010-9

Missaoui R, 2014, ENERG BUILDINGS, V71, P155, DOI 10.1016/j.enbuild.2013.12.018

Muller E, 2013, PROC CIRP, V7, P622, DOI 10.1016/j.procir.2013.06.043

Ngai EWT, 2013, INT J PROD ECON, V146, P453, DOI 10.1016/j.ijpe.2012.12.018

Pai FY, 2011, TECHNOL FORECAST SOC, V78, P650, DOI 10.1016/j.techfore.2010.11.007

Park E, 2014, TELEMAT INFORM, V31, P3, DOI 10.1016/j.tele.2013.07.001  
 Rocha P, 2015, ENERG BUILDINGS, V88, P203, DOI 10.1016/j.enbuild.2014.11.077  
 Son H, 2012, AUTOMAT CONSTR, V28, P82, DOI 10.1016/j.autcon.2012.07.002  
 Stromback J., 2011, POTENTIAL SMART METE  
 Venkatesh V, 2000, MANAGE SCI, V46, P186, DOI 10.1287/mnsc.46.2.186.11926  
 Vikhorev K, 2013, J CLEAN PROD, V43, P103, DOI 10.1016/j.jclepro.2012.12.012  
 Yao R., 2010, INTELLIGENT BUILDING, V2, P72  
 [Anonymous], 2014, HDB ENERGY EC STAT I  
 [Anonymous], SE AS ENERGY OUTLOOK

NR 24

TC 5

Z9 5

U1 0

U2 1

PU ELSEVIER SCIENCE BV

PI AMSTERDAM

PA SARA BURGERHARTSTRAAT 25, PO BOX 211, 1000 AE AMSTERDAM, NETHERLANDS

SN 1877-0509

J9 PROCEDIA COMPUT SCI

PY 2015

VL 72

BP 31

EP 39

DI 10.1016/j.procs.2015.12.102

PG 9

WC Computer Science, Information Systems; Computer Science,  
 Interdisciplinary Applications

SC Computer Science

GA BE6AR

UT WOS:000373775700005

OA gold

DA 2018-05-03

ER

PT S

AU Laicane, I

Blumberga, D

Blumberga, A

Rosa, M

AF Laicane, Ilze

Blumberga, Dagnija

Blumberga, Andra

Rosa, Marika

BE Valtere, S

TI Evaluation of household electricity savings. Analysis of household  
 electricity demand profile and user activities

SO INTERNATIONAL SCIENTIFIC CONFERENCE ENVIRONMENTAL AND CLIMATE  
 TECHNOLOGIES, CONECT 2014

SE Energy Procedia

LA English

DT Proceedings Paper

CT International Scientific Conference on Environmental and Climate  
 Technologies (CONECT)

CY OCT 14-16, 2014

CL Riga, LATVIA

SP Riga Tech Univ, Inst Energy Syst & Environm

DE Smart meters; household electricity consumption; user behavior; demand  
 side management

ID BOTTOM-UP APPROACH; RESIDENTIAL SECTOR; ENERGY SAVINGS; LOAD PROFILES;  
CONSUMPTION; MODEL

AB To achieve reduction in electricity consumption, it is vital to have current information about household electricity use. This allows to draw user behaviour profile based on household electricity demand for a specific time of the day. Activities involving the use of electricity for certain purposes, time of use survey and smart metering data of a four people family were analysed in this study. Household energy efficiency performance till 2020 was evaluated based on increase of equipment energy efficiency driven by technological progress. The results of energy efficiency evaluation for particular household shows that 1219 kWh savings can be achieved due to improvements of energy performance of some mostly used appliances until 2020 (i.e., reduction in electricity consumption of 13 % if compared to present scenario). However, the results imply that user behaviour change is also important to implement the measures associated with energy efficiency improvements in households. (C) 2015 The Authors. Published by Elsevier Ltd.

C1 [Laicane, Ilze; Blumberga, Dagnija; Blumberga, Andra; Rosa, Marika] Riga Tech Univ, Inst Energy Syst & Environm, LV-1048 Riga, Latvia.

RP Laicane, I (reprint author), Riga Tech Univ, Inst Energy Syst & Environm, Azenes Iela 12-1, LV-1048 Riga, Latvia.

EM ilze.laicane@rtu.lv

OI Blumberga, Andra/0000-0002-4712-4794

CR Blumberga A, 2013, J CLEAN PROD, V63, P134

Borg SP, 2011, ENERGBUILDINGS, V43, P2240, DOI 10.1016/j.enbuild.2011.05.001

CAPASSO A, 1994, IEEE T POWER SYST, V9, P957, DOI 10.1109/59.317650

EEA, 2013, ACH EN EFF BEH CHANG

Gara E, 2010, ENV CLIMATE TECHNOLO, V13, P35

Gils HC, 2014, ENERGY, V67, P1, DOI 10.1016/j.energy.2014.02.019

Joachain H, 2014, ECOL ECON, V105, P89, DOI 10.1016/j.ecolecon.2014.05.017

Kagvic A., 2010, BUILD ENVIRON, V45, P1683

Laicane I, 2014, Agronomy Research, V12, P527

Munkhammar J, 2014, APPL ENERG, V135, P382, DOI 10.1016/j.apenergy.2014.08.093

Paatero JV, 2006, INT J ENERG RES, V30, P273, DOI 10.1002/er.1136

Richardson I, 2008, ENERGBUILDINGS, V40, P1560, DOI 10.1016/j.enbuild.2008.02.006

Richardson I, 2010, ENERGBUILDINGS, V42, P1878, DOI 10.1016/j.enbuild.2010.05.023

Richardson I, 2009, ENERGBUILDINGS, V41, P781, DOI 10.1016/j.enbuild.2009.02.010

Santiago I, 2014, ENERGBUILDINGS, V79, P84, DOI 10.1016/j.enbuild.2014.04.055

Swan LG, 2009, RENEW SUST ENERG REV, V13, P1819, DOI 10.1016/j.rser.2008.09.033

Torriti J, 2012, ENERGPOLICY, V44, P199, DOI 10.1016/j.enpol.2012.01.039

Widen J, 2013, P ECEEE SUMM STUD

Widen J, 2012, J BUILD PERFORM SIMU, V5, P27, DOI 10.1080/19401493.2010.532569

Widen J, 2010, APPL ENERG, V87, P1880, DOI 10.1016/j.apenergy.2009.11.006

Widen J, 2009, ENERGBUILDINGS, V41, P1001, DOI 10.1016/j.enbuild.2009.05.002

Widen J, 2009, ENERGBUILDINGS, V41, P753, DOI 10.1016/j.enbuild.2009.02.013

Yao RM, 2005, ENERGBUILDINGS, V37, P663, DOI 10.1016/j.enbuild.2004.09.007

Young D, 2008, ENERGPOLICY, V36, P34, DOI 10.1016/j.enpol.2007.09.011

Zandekis A, 2011, ENV CLIMATE TECHNOLO, V6, P138

NR 25

TC 5

Z9 5

U1 0

U2 5

PU ELSEVIER SCIENCE BV

PI AMSTERDAM

PA SARA BURGERHARTSTRAAT 25, PO BOX 211, 1000 AE AMSTERDAM, NETHERLANDS

SN 1876-6102

J9 ENRGY PROCED

PY 2015

VL 72

BP 285

EP 292

DI 10.1016/j.egypro.2015.06.041

PG 8

WC Energy & Fuels; Environmental Sciences

SC Energy & Fuels; Environmental Sciences & Ecology

GA BD3RL

UT WOS:000360103400040

OA gold

DA 2018-05-03

ER

PT J

AU Groesser, SN

AF Groesser, Stefan N.

TI Co-evolution of legal and voluntary standards: Development of energy efficiency in Swiss residential building codes

SO TECHNOLOGICAL FORECASTING AND SOCIAL CHANGE

LA English

DT Article

DE Co-evolution; Innovation diffusion; Feedback; Causal model; Standard; System structure; Innovation ecosystem; System dynamics; Energy efficiency

ID 2000 W SOCIETY; INNOVATION DIFFUSION; SYSTEM DYNAMICS; PUBLIC-POLICY; MULTILEVEL PERSPECTIVE; TECHNOLOGY DIFFUSION; EXISTING BUILDINGS; TECHNICAL CHANGE; SECTOR; TRANSITIONS

AB Improving the level of energy efficiency required by building codes for refurbishments and new construction is a powerful lever for reducing greenhouse gas emissions. This paper explores how technological, social, political, and economic factors interact and shape the evolution of the energy efficiency in building codes. Existing approaches to the evolution of standards focus primarily on adopting individual or multiple technologies or products, but only peripherally explore the feedback dynamics between innovation, diffusion, and standardization (IDS).(2) To fill this void, I draw on the revelatory case of Switzerland, because the Swiss standards have continuously improved since 1970, whereas in many other countries improvements have stagnated after the recovery from peaks in energy prices. The paper's contribution is, first, a qualitative, structural model which endogenously formalizes the IDS-dynamics of standard improvement. I find that the co-evolution of voluntary and legal building codes have enabled a continuous improvement of the standards even in the absence of economic pressures. And second, I use the model for policy analysis, which indicates that several obvious policies might cause policy resistance and could result in uneconomical, counter-intuitive outcomes. Policy interventions have to dynamically balance the speed of innovation and the ability of system agents to change. (C) 2014 Elsevier Inc. All rights reserved.

C1 Bern Univ Appl Sci, Sch Management, Strategy & Simulat Lab, CH-3022 Bern, Switzerland.

RP Groesser, SN (reprint author), Bern Univ Appl Sci, Sch Management, Strategy & Simulat Lab, Morgartenstr 2c, CH-3022 Bern, Switzerland.

EM stefan.groesser@bfh.ch

RI Gomes, Leonardo/E-9980-2015

CR Abrahamson E, 1997, ORGAN SCI, V8, P289, DOI 10.1287/orsc.8.3.289

Acker RH, 1996, ENERG POLICY, V24, P81, DOI 10.1016/0301-4215(95)00112-3

Alberth S, 2008, TECHNOL FORECAST SOC, V75, P952, DOI 10.1016/j.techfore.2007.09.003

Amstalden RW, 2007, ENERG POLICY, V35, P1819, DOI 10.1016/j.enpol.2006.05.018

Andersen DF, 1997, SYST DYNAM REV, V13, P107, DOI 10.1002/(SICI)1099-1727(199722)13:2<107::AID-SDR120>3.3.CO;2-Z

Ansar J, 2009, ENERG POLICY, V37, P1012, DOI 10.1016/j.enpol.2008.10.037

Arkesteijn K, 2005, ENERG POLICY, V33, P183, DOI 10.1016/S0301-4215(03)00209-X

Audenaert A, 2008, ENERG POLICY, V36, P47, DOI 10.1016/j.enpol.2007.09.022

AWEL, 2007, EN 2006 BER REG EN K

Azar C, 1999, ANNU REV ENERG ENV, V24, P513, DOI 10.1146/annurev.energy.24.1.513

Beerepoot M, 2007, ENERG POLICY, V35, P4812, DOI 10.1016/j.enpol.2007.04.015

BFE, 2005, NACHB ERF INV EN 200

BFE, 2001, EN NACHF EN 2000

- BFE, 2002, RAT EN GEB AKT PROJ
- Biermayr P., 2002, HEMMNISSE FORDERNDE
- Zelenka H., 2001, ANAL FORDERNDER HEMM
- Blind K., 2002, APPL ECON, V34, P1985, DOI 10.1080/00036840110111158
- Blind K., 2006, EC INNOVATION NEW TE, V15, P157, DOI DOI 10.1080/10438590500143970
- Blind K., 2009, J TECHNOL TRANSFER, V34, P320, DOI 10.1007/s10961-008-9089-8
- Botzem S., 2012, ORGAN STUD, V33, P737, DOI 10.1177/0170840612443626
- Bozeman B., 2000, RES POLICY, V29, P627, DOI 10.1016/S0048-7333(99)00093-1
- BP, 2009, OIL PRIC STAT 1871
- BUCKLIN LP, 1993, J PROD INNOVAT MANAG, V10, P148, DOI 10.1111/1540-5885.1020148
- CCEM, 2011, CCEM RETR ADV LOW EN
- Chatterjee K., 2004, ADV APPL PROBAB, V36, P355, DOI 10.1239/aap/1086957576
- Company & McKinsey, 2009, SWISS GREENH GAS COS
- Consoli D., 2008, TECHNOL ANAL STRATEG, V20, P409, DOI 10.1080/09537320802141395
- COYLE RG, 1984, SOCIO ECON PLAN SCI, V18, P219, DOI 10.1016/0038-0121(84)90001-6
- Coyle R. G., 1996, SYSTEM DYNAMICS MODE
- Coyle R. G., 2000, SYST DYN REV, V16, P225
- Daim T., 2014, TECHNOL FORECAST SOC, V80, P1033
- Dattee B., 2007, TECHNOL FORECAST SOC, V74, P579, DOI 10.1016/j.techfore.2007.03.003
- de Vries HJ, 2011, TECHNOL ANAL STRATEG, V23, P249, DOI 10.1080/09537325.2011.550393
- Delley J.D., 1986, ETAT FACE DEFI ENERG
- Dijk M., 2010, TECHNOL FORECAST SOC, V77, P1371, DOI 10.1016/j.techfore.2010.05.001
- DOE, 2009, RES EN CONS
- DOSI G., 1982, RES POLICY, V11, P147, DOI 10.1016/0048-7333(82)90016-6
- E.T.H. Council, 1998, COUNC STRAT NACHH ET
- Edenhofer O., 2011, IPCC SPECIAL REPORT
- Edquist C., 2006, OXFORD HDB ONLINE
- EISENHARDT KM, 1989, ACAD MANAGE REV, V14, P532, DOI 10.2307/258557
- EnDK, 2011, MUST KANT EN MUKEN
- Forrester J. W., 1961, IND DYNAMICS
- FSO, 2008, SWISS ENV STAT BRIEF
- Gann DM, 1998, BUILD RES INF, V26, P280, DOI 10.1080/096132198369760
- Gantenbein K., 2009, BUILDING 2000 WATT S
- Geels FW, 2008, TECHNOL ANAL STRATEG, V20, P521, DOI 10.1080/09537320802292982
- Geels FW, 2005, TECHNOL ANAL STRATEG, V17, P445, DOI 10.1080/09537320500357319
- Geels FW, 2005, TECHNOL FORECAST SOC, V72, P681, DOI 10.1016/j.techfore.2004.08.014
- Goluchowicz K., 2011, TECHNOL FORECAST SOC, V78, P1526, DOI 10.1016/j.techfore.2011.04.014
- Groesser S. N., 2012, COEVOLUTION STANDARD
- Groesser SN, 2012, SYST DYNAM REV, V28, P46, DOI 10.1002/sdr.476
- Guseo R., 2011, TECHNOL FORECAST SOC, V78, P13, DOI 10.1016/j.techfore.2010.06.003
- Gyberg P., 2009, ENERG POLICY, V37, P2807, DOI 10.1016/j.enpol.2009.03.043
- de Haan J., 2011, TECHNOL FORECAST SOC, V78, P90, DOI 10.1016/j.techfore.2010.10.008
- Hekkert MP, 2007, TECHNOL FORECAST SOC, V74, P413, DOI 10.1016/j.techfore.2006.03.002
- Hekkert MP, 2009, TECHNOL FORECAST SOC, V76, P584, DOI 10.1016/j.techfore.2008.04.013
- HENDERSON R, 1995, RES POLICY, V24, P631, DOI 10.1016/S0048-7333(94)00790-X
- Hens H., 2001, ENERG BUILDINGS, V33, P275, DOI 10.1016/S0378-7788(00)00092-X
- Higgins A., 2011, TECHNOL FORECAST SOC, V78, P621, DOI 10.1016/j.techfore.2010.12.003
- IPCC, 2001, CLIM CHANG 2001 SYNT
- IPCC, 2007, CONTRIBUTION WORKING
- IPCC (Intergovernmental Panel on Climate Change), 2007, SUMM POL SYNTH REP I
- JAFFE AB, 1994, ENERG POLICY, V22, P804, DOI 10.1016/0301-4215(94)90138-4
- JAFFE AB, 1994, RESOUR ENERGY ECON, V16, P91, DOI 10.1016/0928-7655(94)90001-9
- Jakob M., 2008, GRUNDLAGEN WIRKUNGS
- Kagi W., 2004, BEST PRACTICE MARKTO
- KAPUR S, 1995, J IND ECON, V43, P173, DOI 10.2307/2950480
- Kaufmann M., 2005, ENERGIESCHWEIZ 2 ETA
- Kern F., 2012, TECHNOL FORECAST SOC, V79, P298, DOI 10.1016/j.techfore.2011.07.004
- Koetse MJ, 2006, SMALL BUS ECON, V26, P365, DOI 10.1007/s11187-005-3201-3

- Koschenz M., 2005, POTENZIAL WOHNGEBAUD
- Kreng VB, 2013, TECHNOL FORECAST SOC, V80, P77, DOI 10.1016/j.techfore.2012.08.002
- Lane DC, 2008, SYST RES BEHAV SCI, V25, P3, DOI 10.1002/sres.826
- Lee DH, 2013, TECHNOL FORECAST SOC, V80, P498, DOI 10.1016/j.techfore.2012.08.009
- Levine M., 2007, CLIMATE CHANGE 2007
- Lundvall BA, 2002, RES POLICY, V31, P213, DOI 10.1016/S0048-7333(01)00137-8
- Madlener R, 2007, ENER POLICY, V35, P1992, DOI 10.1016/j.enpol.2006.06.010
- Marechal F, 2005, RESOUR CONSERV RECY, V44, P245, DOI 10.1016/j.resconrec.2005.01.008
- Marxt C, 2013, TECHNOL FORECAST SOC, V80, P1035, DOI 10.1016/j.techfore.2012.07.008
- McDonald A, 2001, ENER POLICY, V29, P255, DOI 10.1016/S0301-4215(00)00122-1
- McKinsey & Company, 2010, IMP FIN CRIS CARB EC
- Meadows D. H., 1972, LIMITS GROWTH
- Meier R., 2005, GRUNDLAGEN STRATEGIE
- Meijer F, 2009, BUILD RES INF, V37, P533, DOI 10.1080/09613210903189376
- Merito M, 2007, RES POLICY, V36, P1070, DOI 10.1016/j.respol.2007.04.005
- Muller MO, 2012, EUR J OPER RES, V216, P495, DOI 10.1016/j.ejor.2011.07.014
- Murray F, 2002, RES POLICY, V31, P1389, DOI 10.1016/S0048-7333(02)00070-7
- Nassen J, 2005, ENER POLICY, V33, P1037, DOI 10.1016/j.enpol.2003.11.004
- Nassen J, 2008, ENER POLICY, V36, P3814, DOI 10.1016/j.enpol.2008.07.018
- Negro SO, 2008, TECHNOL ANAL STRATEG, V20, P465, DOI 10.1080/09537320802141437
- OECD/IEA, 1997, IAE EN TECHN R D STA
- Pfeiffer A, 2005, ENER BUILDINGS, V37, P1158, DOI 10.1016/j.enbuild.2005.06.018
- Phillips F.Y., 2001, MARKET ORIENTED TECH
- Ravetz J, 2008, ENER POLICY, V36, P4462, DOI 10.1016/j.enpol.2008.09.026
- Roberts S, 2008, ENER POLICY, V36, P4482, DOI 10.1016/j.enpol.2008.09.023
- Rogers E. M., 2013, DIFFUSION INNOVATION
- Schaffernicht M, 2010, SYST RES BEHAV SCI, V27, P653, DOI 10.1002/sres.1018
- Schulz T.F., 2007, THESIS SWISS FEDERAL
- Schulz TF, 2008, ENER POLICY, V36, P1303, DOI [10.1016/j.enpol.2007.12.006, 10.1016/j.enpo1.2007.12.006]
- Schwaninger M, 2008, SYST RES BEHAV SCI, V25, P447, DOI 10.1002/sres.914
- SFOE, 2007, VORST ERH EN WOHNB
- Siller T, 2007, ENER POLICY, V35, P529, DOI 10.1016/j.enpol.2005.12.021
- Sokolov A. P., 2009, REPORT SERIES MIT JO
- Sorrell S, 2009, ENER POLICY, V37, P1356, DOI 10.1016/j.enpol.2008.11.026
- SFOE, 2005, INT VERGL EN BAUB
- STERMAN JD, 1994, SYST DYNAM REV, V10, P291, DOI 10.1002/sdr.4260100214
- Sterman J. D., 2000, BUSINESS DYNAMICS SY
- Stern P.C., 2005, ELR NEWS ANAL, V35, P10785
- STONEMAN P, 1994, ECON J, V104, P918, DOI 10.2307/2234987
- Stoneman P., 2002, EC TECHNICAL DIFFUSI
- Strauss A., 1998, BASICS QUALITATIVE R
- Sunikka M, 2006, BUILD RES INF, V34, P521, DOI 10.1080/09613210600660976
- Sweeney JC, 2008, EUR J MARKETING, V42, P344, DOI 10.1108/03090560810852977
- Urge-Vorsatz D, 2008, ENER POLICY, V36, P642, DOI 10.1016/j.enpol.2007.10.009
- Utterback J. M., 1994, MASTERING DYNAMICS I
- Venkatesh V, 2003, MIS QUART, V27, P425
- Vennix JAM, 1996, GROUP MODEL BUILDING
- Weber L, 1997, ENER POLICY, V25, P833, DOI 10.1016/S0301-4215(97)00084-0
- Weil HB, 2010, KYBERNETES, V39, P1429, DOI 10.1108/03684921011081114
- Weiss M, 2009, ENER POLICY, V37, P2962, DOI 10.1016/j.enpol.2009.03.038
- Yin R., 2008, CASE STUDY RES
- Young H. P., 2005, 43 CSED J HOPKINS U

NR 123

TC 5

Z9 5

U1 6

U2 31



PU ELSEVIER SCIENCE INC  
 PI NEW YORK  
 PA 360 PARK AVE SOUTH, NEW YORK, NY 10010-1710 USA  
 SN 0040-1625  
 EI 1873-5509  
 J9 TECHNOL FORECAST SOC  
 JI Technol. Forecast. Soc. Chang.  
 PD SEP  
 PY 2014  
 VL 87  
 BP 1  
 EP 16  
 DI 10.1016/j.techfore.2014.05.014  
 PG 16  
 WC Business; Planning & Development  
 SC Business & Economics; Public Administration  
 GA AN8OD  
 UT WOS:000340862600001  
 DA 2018-05-03  
 ER

PT J

AU Fensel, A  
 Kumar, V  
 Tomic, SDK

AF Fensel, Anna  
 Kumar, Vikash

Tomic, Slobodanka Dana Kathrin

TI End-user interfaces for energy-efficient semantically enabled smart homes

SO ENERGY EFFICIENCY

LA English

DT Article

DE Smart home; Semantics; Energy efficiency; User interfaces

ID WEB

AB The need for energy efficient technological solutions is becoming ever more prevalent in today's world. However, current advances are failing to offer end-consumers with a flexible solution that can be widely implemented in domestic or business environments. This is particularly relevant at the user interface level where energy consumers should be allowed to easily engage in effective energy saving technology. With the help of semantically linked data, we aim to actively assist end-consumers in making well-informed decisions in order to successfully control their energy consumption. By integrating smart metering and home automation functionality, our SESAME system offers end-consumers energy-efficient and cost-cutting options for their homes or businesses. The developed SESAME system conceptualizes, demonstrates and evaluates a variety of innovative end-consumer services, here focusing specifically on their user interface paradigms. In this paper, we present three types of interactive participatory user interfaces, all of which enable users to interact with the house automation settings modelled as semantic rules, as well their evaluation in user studies based on the demonstrator system. We show that the proposed interfaces have the potential for broad acceptance, and provide a detailed analysis of the effectiveness of their varying design principles and features.

C1 [Fensel, Anna; Kumar, Vikash; Tomic, Slobodanka Dana Kathrin] FTW Forschungszentrum  
 Telekommunikat Wien GmbH, A-1220 Vienna, Austria.

[Fensel, Anna] Univ Innsbruck, Semant Technol Inst STI Innsbruck, A-6020 Innsbruck, Austria.

[Kumar, Vikash] Inland Revenue, Auckland, New Zealand.

RP Fensel, A (reprint author), Univ Innsbruck, Semant Technol Inst STI Innsbruck, A-6020 Innsbruck, Austria.

EM anna.fensel@sti2.at; kumar@ftw.at; tomic@ftw.at

OI Fensel, Anna/0000-0002-1391-7104

FU FFG COIN within SESAME; FFG COIN within SESAME-S; Austrian government;

City of Vienna within the competence centre programme COMET

FX This work is supported by the FFG COIN funding line, within the SESAME and SESAME-S projects. FTW is supported by the Austrian government and the City of Vienna within the competence centre programme COMET. The authors thank the whole SESAME project team for their valuable contributions-especially colleagues from Experimental Factory of Scientific Engineering (EZAN), Russia, for the SESAME hardware development and E-Smart Systems d.o.o., Serbia, for the development of the HAN interfaces, as well as Amy Strub for the editing and English proofreading of this paper.

CR Berners-Lee T, 2001, SCI AM, V284, P34, DOI 10.1038/scientificamerican0501-34  
 BIZER C, 2009, INT J SEMANT WEB INF, V5, P1  
 Bonino D, 2008, PROC INT C TOOLS ART, P157, DOI 10.1109/ICTAL.2008.115  
 [Anonymous], 2012, EN ROADM 2050  
 Fensel A., 2013, INFORM SPEKTRUM, V36, P46  
 Friedman-Hill E, 2003, JESS ACTION JAVA RUL  
 Gray AJG, 2011, LECT NOTES COMPUT SC, V6644, P300, DOI 10.1007/978-3-642-21064-8\_21  
 Hall K., 2005, NEXT GENERATION ENER  
 Hippel E. V., 1986, MANAGE SCI, V32, P791, DOI DOI 10.1287/MNSC.32.7.791  
 Hu H, 2011, IET COMMUN, V5, P2451, DOI 10.1049/iet-com.2010.0615  
 Kimura H., 2011, PSYCHOLOGY J, V9, P7  
 Konnex Association, 2006, KNX HDB HOM BUILD CO  
 Kumar V., 2012, P MOV MEAN INT SYST, V7567, P272  
 Loseto G., 2012, 13 WORKSH OBJ AG WOA, V892, P49  
 Loviscach J., 2011, PSYCHNOL J, V9, P29  
 [Anonymous], 2009, WHIT PAP BAS 2009 SE  
 Schulz S., 2010, SPIEGEL  
 Schwanzner M, 2010, LECT NOTES COMPUT SC, V6369, P78  
 Maglio P.P., 2008, EMERGENCE SERVICE SC  
 Tang Y., 2012, P 11 IEEE INT C TRUS, P1777  
 Tomic S., 2011, APPL SEMANTIC TECHNO  
 Xu JJ, 2009, 2009 INTERNATIONAL CONFERENCE ON EMBEDDED SOFTWARE AND SYSTEMS, PROCEEDINGS, P297, DOI 10.1109/ICISS.2009.60  
 Zapico J.L., 2011, PSYCHOLOGY J, V9, P43  
 Zeiss J., 2008, P INT C SEM SYST I S, P67

NR 24

TC 5

Z9 5

U1 2

U2 21

PU SPRINGER

PI DORDRECHT

PA VAN GODEWIJCKSTRAAT 30, 3311 GZ DORDRECHT, NETHERLANDS

SN 1570-646X

EI 1570-6478

J9 ENERG EFFIC

JI Energy Effic.

PD AUG

PY 2014

VL 7

IS 4

BP 655

EP 675

DI 10.1007/s12053-013-9246-2

PG 21

WC GREEN & SUSTAINABLE SCIENCE & TECHNOLOGY; Energy & Fuels; Environmental Studies

SC Science & Technology - Other Topics; Energy & Fuels; Environmental

Sciences & Ecology  
 GA AL7TM  
 UT WOS:000339338500007  
 DA 2018-05-03  
 ER

PT S

AU Masoudifar, N  
 Hammad, A  
 Rezaee, M

AF Masoudifar, Nassim  
 Hammad, Amin  
 Rezaee, Mandana

BE Tolk, A  
 Yilmaz, L  
 Diallo, SY  
 Ryzhov, IO

TI MONITORING OCCUPANCY AND OFFICE EQUIPMENT ENERGY CONSUMPTION USING  
 REAL-TIME LOCATION SYSTEM AND WIRELESS ENERGY METERS

SO PROCEEDINGS OF THE 2014 WINTER SIMULATION CONFERENCE (WSC)

SE Winter Simulation Conference Proceedings

LA English

DT Proceedings Paper

CT Winter Simulation Conference

CY DEC 07-10, 2014

CL Savannah, GA

ID BUILDINGS

AB Buildings are one of the major energy consumers because of the need to meet occupants requirements. The commercial/institutional sector accounted for 14% of total energy consumption in Canada in 2009 while office buildings consumed 35% of this amount. Auxiliary equipment used 19% of the total energy consumed in office buildings. Previous studies showed the impact of occupancy behavior on IT equipment energy consumption. This paper proposes a new method for monitoring occupant behavior and energy consumption of IT equipment. Analyzing the resulting data can help evaluating the occupancy behavior impact on energy saving. Two wireless sensor technologies are investigated to collect the required data and to build an occupancy behavior estimation profile: Ultra-Wideband Real-Time Location System for occupancy location monitoring and Zigbee wireless energy meters for monitoring the energy consumption of IT equipment. The occupancy behavior estimation profile can be used to reduce energy consumption based on real-time occupants' information.

C1 [Masoudifar, Nassim; Hammad, Amin; Rezaee, Mandana] Concordia Univ, Fac Engn & Comp Sci, 1455  
 Maisonneuve Blvd West, Montreal, PQ H3G 1M8, Canada.

RP Masoudifar, N (reprint author), Concordia Univ, Fac Engn & Comp Sci, 1455 Maisonneuve Blvd West,  
 Montreal, PQ H3G 1M8, Canada.

EM n\_masoud@encs.concordia.ca; hammad@ciise.concordia.ca;  
 m\_rezaee@encs.concordia.ca

CR Agarwal Y., 2010, P 2 ACM WORKSH EMB S, P1, DOI DOI 10.1145/1878431.1878433  
 Azar E, 2012, J COMPUT CIVIL ENG, V26, P506, DOI 10.1061/(ASCE)CP.1943-5487.0000158  
 Barbato A., 2009, P 1 ACM WORKSH EMB S, P49, DOI DOI 10.1145/1810279.1810291  
 Conti J., 2013, INT ENERGY OUTLOOK  
 Delaney Declan T, 2009, P 1 ACM WORKSH EMB S, P61  
 Dong B., 2009, P 11 INT IBPSA C BUI  
 Erickson V. L., 2010, P 2 ACM WORKSH EMB S, P1  
 Erickson V. L., 2009, P 1 ACM WORKSH EMB S, P19, DOI DOI 10.1145/1810279.1810284  
 Harle R.K., 2008, P 10 INT C UB COMP U, P302, DOI DOI 10.1145/1409635.1409676  
 Kamthe A., 2009, P 6 EUR C WIR SENS N, P279  
 Li S, 2011, P 28 INT ASS AUT ROB, P587  
 Martani C, 2012, ENER BUILDINGS, V47, P584, DOI 10.1016/j.enbuild.2011.12.037  
 Menezes AC, 2013, BUILD SERV ENG RES T, V34, P73, DOI 10.1177/0143624412465092  
 Newsham G. R., 2010, P 2 ACM WORKSH EMB S, P13

Padmanabh K., 2009, P 1 ACM WORKSH EMB S, P37  
 Singh V. B., 2011, THESIS  
 Spataru C., 2012, SUSTAINABILITY ENER, P471  
 Sun ZW, 2011, BUILD ENVIRON, V46, P124, DOI 10.1016/j.buildenv.2010.07.008  
 Tachwali Y., 2007, P 33 ANN C IEEE IND, P439  
 Nguyen TA, 2013, ENER BUILDINGS, V56, P244, DOI 10.1016/j.enbuild.2012.09.005  
 Yang Z., 2012, P CONSTR RES C, P828  
 Yu Z, 2011, ENER BUILDINGS, V43, P1409, DOI 10.1016/j.enbuild.2011.02.002

NR 22

TC 5

Z9 5

U1 0

U2 1

PU IEEE

PI NEW YORK

PA 345 E 47TH ST, NEW YORK, NY 10017 USA

SN 0891-7736

BN 978-1-4799-7486-3

J9 WINT SIMUL C PROC

PY 2014

BP 1108

EP 1119

PG 12

WC Computer Science, Information Systems; Computer Science,  
 Interdisciplinary Applications; Computer Science, Theory & Methods

SC Computer Science

GA BG4XP

UT WOS:000389248201035

DA 2018-05-03

ER

PT J

AU Suter, JF

Shammin, MR

AF Suter, Jordan F.

Shammin, Md Rumi

TI Returns to residential energy efficiency and conservation measures: A  
 field experiment

SO ENERGY POLICY

LA English

DT Article

DE Energy efficiency; Field experiment; Residential energy

ID SOCIAL NORMS; BILLING DATA; CONSUMPTION; DEMAND; FEEDBACK; GAP

AB Residential energy conservation is a key component of contemporary energy, and climate change policy in the US and elsewhere. Comparisons of the relative effectiveness of measures aimed at reducing residential energy consumption are made challenging, however, by the endogeneity of technology and energy use decisions. In this paper we describe a novel small-scale field experiment that uses randomized treatments to estimate the returns to three types of energy conservation measures in institutionally owned homes. The results from the experiment indicate considerable reductions in natural gas consumption associated with the installation of attic insulation and the provision of incentives for conservation. The results are supported by observations of ambient indoor temperature data, which show that households receiving incentives significantly reduce their temperature settings especially when coupled with access to a programmable thermostat. The study will ideally provide guidance for institutions and communities considering energy efficiency measures and for future researchers designing randomized experiments to study residential energy use. (c) 2013 Elsevier Ltd. All rights reserved.

C1 [Suter, Jordan F.] Oberlin Coll, Dept Econ, Oberlin, OH 44074 USA.

[Shammin, Md Rumi] Oberlin Coll, Environm Studies Program, Oberlin, OH 44074 USA.

RP Suter, JF (reprint author), Oberlin Coll, Dept Econ, Oberlin, OH 44074 USA.

EM jsuter@oberlin.edu; rshammin@oberlin.edu  
 CR Allcott H, 2012, J ECON PERSPECT, V26, P3, DOI 10.1257/jep.26.1.3  
 Allcott H, 2011, J PUBLIC ECON, V95, P1082, DOI 10.1016/j.jpubeco.2011.03.003  
 Ayres I., J LAW EC ORG  
 BATTALIO RC, 1979, REV ECON STAT, V61, P180, DOI 10.2307/1924585  
 Bertrand M, 2004, Q J ECON, V119, P249, DOI 10.1162/003355304772839588  
 Costa D. L., 2010, 15939 NBER  
 Costa Dora L., 2010, 15978 NBER  
 Davis L., 2010, EVALUATING SLO UNPUB  
 Davis LW, 2008, RAND J ECON, V39, P530, DOI 10.1111/j.0741-6261.2008.00026.x  
 DUBIN JA, 1984, ECONOMETRICA, V52, P345, DOI 10.2307/1911493  
 DUBIN JA, 1986, RAND J ECON, V17, P310, DOI 10.2307/2555713  
 Gillingham K, 2012, ENERG J, V33, P37, DOI 10.5547/01956574.33.2.3  
 Gillingham K, 2009, ANNU REV RESOUR ECON, V1, P597, DOI 10.1146/annurev.resource.102308.124234  
 Greening LA, 2000, ENERG POLICY, V28, P389  
 HAYES SC, 1977, J APPL BEHAV ANAL, V10, P425, DOI 10.1901/jaba.1977.10-425  
 Jacobsen GD, 2013, REV ECON STAT, V95, P34, DOI 10.1162/REST\_a\_00243  
 JAFFE AB, 1994, ENERG POLICY, V22, P804, DOI 10.1016/0301-4215(94)90138-4  
 Levinson A, 2004, RESOUR ENERGY ECON, V26, P51, DOI [10.1016/S0928-7655(03)00047-2,  
 10.1016/50928-7655(03)00047-2]  
 Metcalf GE, 1999, REV ECON STAT, V81, P516, DOI 10.1162/003465399558274  
 Nolan J., 2008, PERSONALITY SOCIAL P, V34, P13  
 Schultz PW, 2007, PSYCHOL SCI, V18, P429, DOI 10.1111/j.1467-9280.2007.01917.x  
 Sutherland R. J., 1991, ENERGY J, V12, P15, DOI DOI 10.5547/ISSN0195-6574-EJ-VOL12-N03-3  
 US Census Bureau, 2009, AM HOUS SURV  
 Vossler CA, 2013, HANDBOOK ON EXPERIMENTAL ECONOMICS AND THE ENVIRONMENT, P89  
 WINETT RA, 1979, J APPL BEHAV ANAL, V12, P173, DOI 10.1901/jaba.1979.12-173

NR 25

TC 5

Z9 5

U1 1

U2 24

PU ELSEVIER SCI LTD

PI OXFORD

PA THE BOULEVARD, LANGFORD LANE, KIDLINGTON, OXFORD OX5 1GB, OXON, ENGLAND

SN 0301-4215

EI 1873-6777

J9 ENERG POLICY

J1 Energy Policy

PD AUG

PY 2013

VL 59

BP 551

EP 561

DI 10.1016/j.enpol.2013.04.003

PG 11

WC Economics; Energy & Fuels; Environmental Sciences; Environmental Studies

SC Business & Economics; Energy & Fuels; Environmental Sciences & Ecology

GA 202QW

UT WOS:000323235700049

DA 2018-05-03

ER

PT J

AU Bladh, M

AF Bladh, Mats

TI Energy efficient lighting meets real home life

SO ENERGY EFFICIENCY

LA English

DT Article

DE Lighting; LED; Acceptance; Household; Path dependence; Phase-out; Energy saving; Rebound effect

ID BARRIERS; TECHNOLOGIES; DRIVERS

AB Will the phase-out of inefficient lighting in the European Union (EU) lower consumption of residential electricity significantly? Will light-emitting diode (LED) light replace other technologies for lighting in the near future? Implementation of the phase-out decision in the EU will push demand for efficient lighting technologies. One of the most efficient types, light-emitting diodes, promises even greater reductions than CFLs. However, in order to reap the gains from LEDs they must replace existing lamps and luminaires. This paper reports the findings from tests of LED lights in real homes. It points at the limits of the LED technology at sale in the market today, and the risk for a rebound effect. This paper also addresses the more general issue of theoretical development in the area of residential use of electricity. A "frame of interpretation" is presented in which the use of the lighting set in a home is the foundation. From this, sociotechnical and pathdependent aspects on technical and cultural inertia and marginal change can be developed.

C1 Linköping Univ, Dept Themat Studies Technol & Social Change, SE-58183 Linköping, Sweden.

RP Bladh, M (reprint author), Linköping Univ, Dept Themat Studies Technol & Social Change, SE-58183 Linköping, Sweden.

EM mats.bladh@liu.se

CR Bjiker Wiebe, 1992, SHAPING TECHNOLOGY B, P205

ARTHUR WB, 1988, TECHNICAL CHANGE EC, P590

Bertoldi P, 2008, INT J GREEN ENERGY, V5, P15, DOI 10.1080/15435070701839397

BLADH M, 2010, P SUST EV LIF C NORR

Bladh M, 2008, ENERG POLICY, V36, P3521, DOI 10.1016/j.enpol.2008.06.001

Caird S, 2008, ENERG EFFIC, V1, P149, DOI 10.1007/s12053-008-9013-y

Callon M., 1987, SOCIAL CONSTRUCTION, P83

David P. A., 1986, EC HIST MODERN EC, P30

LANCASTER KJ, 1966, J POLIT ECON, V74, P132, DOI 10.1086/259131

\*LEDSH, 2009, LED PHIL MASTERLED 7

NEIJ L, 2001, BUILDING SUSTAINABLE

NILSSON L, 2009, E COMMUNICATION 1218

Rohdin P, 2007, ENERG POLICY, V35, P672, DOI 10.1016/j.enpol.2006.01.010

Shove E, 1998, ENERG POLICY, V26, P1105, DOI 10.1016/S0301-4215(98)00065-2

SHOVE E, 2006, EARTHSCAN READER SUS

Urge-Vorsatz D, 2001, ENERG POLICY, V29, P801, DOI 10.1016/S0301-4215(01)00013-1

VANTICHELEN P, 2009, FINAL REPORT LOT 19

Weber L, 1997, ENERG POLICY, V25, P833, DOI 10.1016/S0301-4215(97)00084-0

Wilhite H, 1996, ENERG POLICY, V24, P795, DOI 10.1016/0301-4215(96)00061-4

Wilhite H, 2008, ENERG EFFIC, V1, P121, DOI 10.1007/s12053-008-9006-x

Zimmerman J.P., 2009, END USE METERING CAM

NR 21

TC 5

Z9 5

U1 1

U2 20

PU SPRINGER

PI DORDRECHT

PA VAN GODEWIJCKSTRAAT 30, 3311 GZ DORDRECHT, NETHERLANDS

SN 1570-646X

J9 ENERG EFFIC

J1 Energy Effic.

PD MAY

PY 2011

VL 4

IS 2

BP 235

EP 245

DI 10.1007/s12053-010-9092-4

PG 11

WC GREEN & SUSTAINABLE SCIENCE & TECHNOLOGY; Energy & Fuels; Environmental Studies

SC Science & Technology - Other Topics; Energy & Fuels; Environmental Sciences & Ecology

GA 796RA

UT WOS:000293068200008

DA 2018-05-03

ER

PT S

AU Siew, CC

Che-Ani, AI

Tawil, NM

Abdullah, NAG

Mohd-Tahir, M

AF Siew, C. C.

Che-Ani, A. I.

Tawil, N. M.

Abdullah, N. A. G.

Mohd-Tahir, M.

BE Tawil, NM

Ani, AIC

Hamid, MY

Radzuan, NAM

TI Classification of Natural Ventilation Strategies in Optimizing Energy Consumption in Malaysian Office Buildings

SO 2ND INTERNATIONAL BUILDING CONTROL CONFERENCE

SE Procedia Engineering

LA English

DT Proceedings Paper

CT 2nd International Building Control Conference

CY JUL 11-12, 2011

CL Penang, MALAYSIA

DE Natural ventilation; Physical Passive Designs; Multiple Regression Analysis

ID PERFORMANCE; ENVIRONMENT; SYSTEM

AB Buildings have been defined as one of the major contributors to environmental problems in construction and operation stages. Intensive researches have been conducted to intensify green building designs by using alternative sustainable construction technologies and operation approaches in order to reduce energy use, and at the same time, to maximize the utility of natural resources. One of the strategies that are widely applied in the building operation recently is to optimize the potential usage of natural ventilation within an interior building space. This paper explores literally the conceptual approaches of classifying physical passive designs to optimize the application of natural ventilation within building zones. Through these findings, the categories of physical designs can be classified in five major groups, which are Air Wells, Facade Designs, Ventilation Openings, Corridors and Shadings, and Blockage and Partitions. (C) 2010 Published by Elsevier Ltd. Selection and/or peer-review under responsibility of Universiti Teknologi MARA Perak and Institution of Surveyor Malaysia (ISM).

C1 [Siew, C. C.] Legenda Educ Grp, Sch Quant Surveying & Construct Management, BUTL Batu 12, Mantin 71700, Malaysia.

[Che-Ani, A. I.; Tawil, N. M.; Abdullah, N. A. G.; Mohd-Tahir, M.] Univ Kebangsaan Malaysia, Fac Engr & Built Environm, Dept Architect, Bangi 43600, Malaysia.

RP Siew, CC (reprint author), Legenda Educ Grp, Sch Quant Surveying & Construct Management, BUTL Batu 12, Mantin 71700, Malaysia.

EM scchan@legendagroup.edu.my

RI Che-Ani, Adi Irfan/H-5350-2011

OI Che-Ani, Adi Irfan/0000-0002-8516-6522

CR Allison PD, 1999, MULTIPLE REGRESSION, P1  
 Allocca C, 2003, ENER G BUILDINGS, V35, P785, DOI 10.1016/S0378-7788(02)00239-6  
 Almeida Manuela, 2005, NATURAL VENTILATION, P168  
 Anselm Akubue Jideofor, 2006, Journal of Applied Sciences, V6, P958  
 Cardinale N, 2003, ENER G BUILDINGS, V35, P153, DOI 10.1016/S0378-7788(02)00024-5  
 Chan ALS, 2009, ENER G BUILDINGS, V41, P1135, DOI 10.1016/j.enbuild.2009.05.012  
 Chen Qingyan, 2001, 7 INT IBPSA C RIO JA, P577  
 Chen QY, 2009, BUILD ENVIRON, V44, P848, DOI 10.1016/j.buildenv.2008.05.025  
 Eley Associates, 2004, HAW COMM BUILD GUID  
 Ghiaus C, 2005, NATURAL VENTILATION, P136  
 Ghiaus Cristian, 2005, NATURAL VENTILATION, P36  
 Gratia E, 2004, BUILD ENVIRON, V39, P1157, DOI 10.1016/j.buildenv.2004.02.005  
 Green Building Index, 2011, GBI CERT BUILD  
 Haase M, 2009, ENER G BUILDINGS, V41, P361, DOI 10.1016/j.enbuild.2008.11.008  
 Heiselberg P., 2002, 35 HYBR VENT CTR AAL  
 Jafarian SM, 2010, ENER G BUILDINGS, V42, P559, DOI 10.1016/j.enbuild.2009.10.025  
 Juan YK, 2009, ENER G BUILDINGS, V42, P290, DOI 10.1016/j.enbuild.2009.09.006  
 Lin Z, 2009, BUILD ENVIRON, V44, P534, DOI 10.1016/j.buildenv.2008.04.018  
 Mohamed M. F., 2008, INT C CONSTR BUILD T, P173  
 Okba E. M., 2005, INT C PASS LOW EN CO, P467  
 Omer AM, 2008, RENEW SUST ENER G REV, V12, P1789, DOI 10.1016/j.rser.2006.05.009  
 Prianto E., 2003, INT J ARCHITECTURAL, V4, P114  
 Priyadarsini R, 2004, ENER G BUILDINGS, V36, P61, DOI 10.1016/S0378-7788(03)00076-8  
 Roulet Claude-Alain, 2005, NATURAL VENTILATION, P20  
 Roulet Claude-Alain, 2005, NATURAL VENTILATION, P158  
 Santamouris M., 2005, NATURAL VENTILATION, P1  
 Tian C, 2010, SOL ENERGY, V84, P1232, DOI 10.1016/j.solener.2010.03.030  
 Yuan Lim Jee, 2011, TRADITIONAL MALAY HO  
 Zhou JL, 2008, ENER G BUILDINGS, V40, P979, DOI 10.1016/j.enbuild.2007.08.001  
 Zhou Liang, 2005, BUILD ENVIRON, V44, P651

NR 30  
 TC 5  
 Z9 5  
 U1 0  
 U2 4  
 PU ELSEVIER SCIENCE BV  
 PI AMSTERDAM  
 PA SARA BURGERHARTSTRAAT 25, PO BOX 211, 1000 AE AMSTERDAM, NETHERLANDS  
 SN 1877-7058  
 J9 PROCEDIA ENGINEER  
 PY 2011  
 VL 20  
 DI 10.1016/j.proeng.2011.11.178  
 PG 9  
 WC Construction & Building Technology; Engineering, Civil  
 SC Construction & Building Technology; Engineering  
 GA BYU56  
 UT WOS:000300440200045  
 OA gold  
 DA 2018-05-03  
 ER

PT J  
 AU Newsham, GR  
 Mancini, S  
 Marchand, RG  
 AF Newsham, Guy R.  
 Mancini, Sandra



Marchand, Roger G.

TI Detection and acceptance of demand-responsive lighting in offices

SO LEUKOS

LA English

DT Article

DE demand response; load shedding; energy management; comfort

AB Participants (N = 33) in an office laboratory were exposed to an initial baseline electric lighting level of 400 lx on the desktop. The electric lighting was dimmed smoothly over 10 seconds. During the dim, and for 30 seconds afterwards, the participant performed a computer-based proofreading task. The participants indicated if they had noticed the change, and whether the lighting conditions were acceptable. This was repeated over multiple trials, with dimming from 0 to 80 percent, and with or without daylight. The level of dimming not noticed by occupants was 20 percent with no daylight, 40 percent with relatively low prevailing daylight, and 60 percent with high prevailing daylight (or, alternatively, an amount which represents 20 percent of total light level). The level of dimming that resulted in conditions that were still acceptable was 40 percent with no or low daylight, and 80 percent with high prevailing daylight. These results may be used to develop guidelines for using lighting in demand response actions. They suggest that dimming lights can contribute large electricity demand reductions during periods of grid stress without major inconvenience to occupants.

C1 [Newsham, Guy R.; Mancini, Sandra; Marchand, Roger G.] Natl Res Council Canada, Inst Res Construct, Ottawa, ON K1A 0R6, Canada.

RP Newsham, GR (reprint author), Natl Res Council Canada, Inst Res Construct, Ottawa, ON K1A 0R6, Canada.

EM guy.newsham@nrc-cnrc.gc.ca

CR \*ADM ASS, 2007, DEM RESP TECHN EV MA

Akashi Y., 2005, Lighting Research & Technology, V37, P133, DOI 10.1191/1365782805li140oa

Akashi Y., 2004, J ILLUM ENG SOC, V33, P3

\*ASHRAE, 2004, 552004 ANSI ASHRAE

BLACKWELL R, 2006, SHOOTING BREEZE GLOB

Boyce PR, 2006, LIGHTING RES TECHNOL, V38, P191, DOI 10.1191/1365782806lrt161oa

BOYCE PR, 1984, P CEA DBR S OTT CAN, P69

International Energy Agency (IEA), 2006, LIGHT LAB LOST POL E

[IESNA] Illuminating Engineering Society of North America, 2000, LIGHT HDB REF APPL

JOUTEY HA, 2006, P EPIC C LYON, V2, P419

KELLY DH, 1961, J OPT SOC AM, V51, P422, DOI 10.1364/JOSA.51.000422

Kiliccote S., 2006, P ACEEE SUMM STUD EN

Kryszczuk KM, 2002, J ILLUM ENG SOC, V31, P3, DOI 10.1080/00994480.2002.10748387

Newsham G. R., 2006, P ACEEE SUMM STUD AS

Newsham GR, 2006, LEUKOS, V3, P105, DOI 10.1582/LEUKOS.2006.03.02.002

PERSON A, 2006, BUILDING SERV J, V28, P11

Piette MA, 2005, FINDINGS 2004 FULLY

Rosenzweig M.B., 2003, ELECT J, V16, P11

ROWLANDS IH, 2005, 2005139 CETC

RUBINSTEIN F, 2007, LBNL62226 LBNL DRRC

\*SCE, 2005, DEM RESP TECHN EV LA

\*SCE, 2005, DEM RESP TECHN EV GA

Shikakura T., 2003, J LIGHT VISUAL ENV, V27, P75

TENNER AD, 1997, P 8 EUR LIGHT C AMST, P131

NR 24

TC 5

Z9 5

U1 0

U2 2

PU ILLUMINAT ENG SOC NORTH AMER

PI NEW YORK

PA 120 WALL ST, 17TH FL, NEW YORK, NY 10005-4001 USA

SN 1550-2724

J9 LEUKOS

J1 Leukos

PD JAN

PY 2008

VL 4

IS 3

BP 139

EP 156

DI 10.1582/LEUKOS.2007.004.03.001

PG 18

WC Construction & Building Technology; Optics

SC Construction & Building Technology; Optics

GA 271EC

UT WOS:000253770700002

DA 2018-05-03

ER

PT J

AU Santisirisomboon, J

Limmechokchai, B

Chungpaibulpatana, S

AF Santisirisomboon, J

Limmechokchai, B

Chungpaibulpatana, S

TI An assessment of energy efficiency programs in Thai commercial and industrial sectors

SO ENERGY SOURCES

LA English

DT Article

DE demand-side management; emission control; emissions mitigation; end-use model; energy demand analysis and forecasting; least-cost electricity generation planning

AB An assessment of benefits of the implementation of demand-side management (DSM) and energy efficiency programs to the commercial and industrial sectors in Thailand is presented, and the corresponding impacts on power-generation expansion planning and emissions are discussed. The reference building models were simulated to capture energy consumption patterns of the medium and large commercial buildings in Thailand. Nine subsectors in the industrial sector classified according to the international standard codes, are modeled and analyzed through the technoeconomic approach. Scenarios of the energy efficiency programs in Thailand are applied to the commercial and industrial sectors to investigate the potential of energy savings. Control technologies of airborne emissions from the utilization of fossil fuels in the power sector are also applied. Finally, a least-cost electricity expansion model is used to generate new generation plans. Features of the resultant plans include a significant reduction in the required power capacity addition and airborne emissions of fossil-fired power plants compared to a reference plan.

C1 Thammasat Univ, Sirindhorn Int Inst Technol, Pathumthani 12121, Thailand.

RP Limmechokchai, B (reprint author), Thammasat Univ, Sirindhorn Int Inst Technol, Pathumthani 12121, Thailand.

CR \*DEP EN DEV PROM, 1997, THAIL EN SIT 1997

DUANGJAI, 1995, ELECT M NEEDS LEAST

\*EL GEN AUTH THAIL, 1997, 9701 EGAT PDP

[Anonymous], 1984, EXP PLANN EL GEN SYS

\*INT AT EN AG, 1995, WIEN AUT SYST PLANN

\*INT PAN CLIM CHAN, 1995, GUID NAT GREENH GAS

\*KING MONGK I TECH, 1992, EN AUD 70 COMM BUILD

\*LAWR BERK NAT LAB, 1995, DOE 2 SUPPL VERS 2 1

\*NAT EC SOC DEV BO, 1999, NAT INC THAIL 1998

\*NAT EN POL OFF, 1997, STRAT EN DEV 8 NAT

\*THAIL ENV I, 1997, THAIL NAT GREENH GAS

NR 11

TC 5

Z9 5  
U1 1  
U2 6  
PU TAYLOR & FRANCIS INC  
PI PHILADELPHIA  
PA 325 CHESTNUT ST, SUITE 800, PHILADELPHIA, PA 19106 USA  
SN 0090-8312  
J9 ENERG SOURCE  
JI Energy Sources  
PD NOV  
PY 2000  
VL 22  
IS 9  
BP 825  
EP 836  
DI 10.1080/009083100300001627  
PG 12  
WC Energy & Fuels; Engineering, Chemical  
SC Energy & Fuels; Engineering  
GA 371CZ  
UT WOS:000165161600005  
DA 2018-05-03  
ER

PT J

AU de la Cruz-Lovera, C

Perea-Moreno, AJ

de la Cruz-Fernandez, JL

Alvarez-Bermejo, JA

Manzano-Agugliaro, F

AF de la Cruz-Lovera, Carmen

Perea-Moreno, Alberto-Jesus

de la Cruz-Fernandez, Jose-Luis

Antonio Alvarez-Bermejo, Jose

Manzano-Agugliaro, Francisco

TI Worldwide Research on Energy Efficiency and Sustainability in Public Buildings

SO SUSTAINABILITY

LA English

DT Article

DE energy saving; energy efficiency; sustainability; building

ID THERMAL COMFORT; H-INDEX; MANAGEMENT; FUTURE; ARCHITECTURE; CONSUMPTION; STRATEGIES; COUNTRIES; CLIMATE; SYSTEMS

AB The present study details the significant contribution that different international institutions have made to the field of sustainability and energy efficiency, with a focus on public buildings. This has been achieved by making use of the database Scopus, by applying bibliometric techniques and by analyzing the contents of articles published from 1976 to 2016. All the materials included in the analysis have been reported from Scopus. Several key aspects of the publications have been considered such as document type, language, subject area, journal type and keywords. Sustainable Development, Sustainability, Energy Conservation, Energy Efficiency and Buildings have been verified as the most used keywords. The obtained contributions have been classified geographically and by institution, with the United States, the United Kingdom, China, Australia and Italy being the leading research countries and Hong Kong Polytechnic University, Delft University of Technology and Tsinghua University the top contributing institutions. The most active categories in those fields are engineering, social sciences and environmental issues in that order. It can be assumed that the study of sustainability and energy efficiency across all its dimensions is of great interest for the scientific community. The global environmental issue has led many countries to incorporate a wide range of Energy Efficiency (EE) strategies in order to reduce energy consumption in public buildings, a highly valued aspect by European Union energy labelling.

C1 [de la Cruz-Lovera, Carmen; Perea-Moreno, Alberto-Jesus; de la Cruz-Fernandez, Jose-Luis] Univ Cordoba, Dept Fis Aplicada, E-14071 Cordoba, Spain.

[Antonio Alvarez-Bermejo, Jose] Univ Almeria, Dept Informat, Almeria 04120, Spain.

[Manzano-Agugliaro, Francisco] Univ Almeria, Dept Engrn, CEIA3, Almeria 04120, Spain.

RP Manzano-Agugliaro, F (reprint author), Univ Almeria, Dept Engrn, CEIA3, Almeria 04120, Spain.

EM z52crloc@uco.es; aperea@uco.es; fa1crfej@uco.es; jaberme@ual.es;

fmanzano@ual.es

RI Manzano-Agugliaro, Francisco/K-8184-2014

OI Manzano-Agugliaro, Francisco/0000-0002-0085-030X; Perea Moreno, Alberto

Jesus/0000-0002-3196-7033; Alvarez Bermejo, Jose

Antonio/0000-0002-5815-7858

CR AlFaris F, 2016, ENERGBUILDINGS, V131, P158, DOI 10.1016/j.enbuild.2016.09.016

AlFaris F, 2016, J CLEAN PROD, V135, P794, DOI 10.1016/j.jclepro.2016.06.172

Allouhi A, 2015, J CLEAN PROD, V109, P118, DOI 10.1016/j.jclepro.2015.05.139

Ayres RU, 2007, ENERGY, V32, P634, DOI 10.1016/j.energy.2006.06.005

Batey M, 2016, ENERGBUILDINGS, V9, P939, DOI 10.1007/s12053-015-9415-6

Berardi U, 2012, SUSTAIN DEV, V20, P411, DOI 10.1002/sd.532

Bull R, 2012, ENERGBUILDINGS, V50, P103, DOI 10.1016/j.enbuild.2012.03.032

Du HB, 2013, ENERGBUILDINGS, V6, P177, DOI 10.1007/s12053-012-9171-9

Ekins P, 2008, ENERGPOLICY, V36, P4580, DOI 10.1016/j.enpol.2008.09.006

Ferenhof HA, 2014, J CLEAN PROD, V74, P44, DOI 10.1016/j.jclepro.2014.03.027

Geller H, 2006, ENERGPOLICY, V34, P556, DOI 10.1016/j.enpol.2005.11.010

Hepbasli A, 2008, RENEW SUST ENERGBUILDINGS, V12, P593, DOI 10.1016/j.rser.2006.10.001

Herring H., 1996, UK ENERGY EXPERIENCE, P327

Hirsch JE, 2007, P NATL ACAD SCI USA, V104, P19193, DOI 10.1073/pnas.0707962104

Hirsch JE, 2005, P NATL ACAD SCI USA, V102, P16569, DOI 10.1073/pnas.0507655102

Perea-Moreno AJ, 2017, J CLEAN PROD, V148, P545, DOI 10.1016/j.jclepro.2017.02.019

Kulasegarah J, 2010, EUR ARCH OTO-RHINO-L, V267, P455, DOI 10.1007/s00405-009-1009-5

Lior N, 2010, ENERGY, V35, P3976, DOI 10.1016/j.energy.2010.03.034

Manzano-Agugliaro F, 2013, RENEW SUST ENERGBUILDINGS, V18, P134, DOI 10.1016/j.rser.2012.10.020

Manzano-Agugliaro F, 2015, RENEW SUST ENERGBUILDINGS, V49, P736, DOI 10.1016/j.rser.2015.04.095

Marszal AJ, 2011, ENERGBUILDINGS, V43, P971, DOI 10.1016/j.enbuild.2010.12.022

Martinez-Lao J, 2017, RENEW SUST ENERGBUILDINGS, V77, P970, DOI 10.1016/j.rser.2016.11.239

Martinez-Molina A, 2016, RENEW SUST ENERGBUILDINGS, V61, P70, DOI 10.1016/j.rser.2016.03.018

Mattoni B, 2015, SUSTAIN CITIES SOC, V15, P105, DOI 10.1016/j.scs.2014.12.002

Medina A, 2016, SUSTAINABILITY-BASEL, V8, DOI 10.3390/su8101039

Montoya FG, 2017, ENERGBUILDINGS, V140, P50, DOI 10.1016/j.enbuild.2017.01.028

Montoya FG, 2016, J CLEAN PROD, V112, P4719, DOI 10.1016/j.jclepro.2015.06.042

Montoya FG, 2016, RENEW SUST ENERGBUILDINGS, V54, P846, DOI 10.1016/j.rser.2015.10.091

Montoya FG, 2014, RENEW SUST ENERGBUILDINGS, V29, P173, DOI 10.1016/j.rser.2013.08.094

Perez-Lombard L, 2008, ENERGBUILDINGS, V40, P394, DOI 10.1016/j.enbuild.2007.03.007

Pisello AL, 2012, BUILD ENVIRON, V58, P37, DOI 10.1016/j.buildenv.2012.06.017

Poel B, 2007, ENERGBUILDINGS, V39, P393, DOI 10.1016/j.enbuild.2006.08.008

Semprini G, 2016, ENERGBUILDINGS, V126, P365, DOI 10.1016/j.enbuild.2016.05.009

Unander F, 2007, APPL ENERGBUILDINGS, V84, P771, DOI 10.1016/j.apenergy.2007.01.008

Urge-Vorsatz D, 2009, ENERGBUILDINGS, V2, P87, DOI 10.1007/s12053-009-9049-7

Viholainen J, 2016, APPL ENERGBUILDINGS, V163, P295, DOI 10.1016/j.apenergy.2015.10.101

Yigitcanlar T, 2015, SUSTAINABILITY-BASEL, V7, P14677, DOI 10.3390/su71114677

Zhao L, 2017, SUSTAINABILITY-BASEL, V9, DOI 10.3390/su9020208

[Anonymous], 2007, PLAN ACC CONS EUR BR

[Anonymous], 2016, KEY WORLD EN STAT

NR 40

TC 4

Z9 4

U1 9

U2 37

PU MDPI AG

PI BASEL

PA ST ALBAN-ANLAGE 66, CH-4052 BASEL, SWITZERLAND  
SN 2071-1050

J9 SUSTAINABILITY-BASEL

J1 Sustainability

PD AUG

PY 2017

VL 9

IS 8

AR 1294

DI 10.3390/su9081294

PG 20

WC GREEN & SUSTAINABLE SCIENCE & TECHNOLOGY; Environmental Sciences;  
Environmental Studies

SC Science & Technology - Other Topics; Environmental Sciences & Ecology

GA FF3YT

UT WOS:000408861800009

OA gold

DA 2018-05-03

ER

PT J

AU Muresan, AA

Attia, S

AF Muresan, Adina Ana

Attia, Shady

TI Energy efficiency in the Romanian residential building stock: A  
literature review

SO RENEWABLE & SUSTAINABLE ENERGY REVIEWS

LA English

DT Review

DE Energy policy; Passive house; Thermal comfort; Thermal insulation; Fuel  
poverty; Sustainable renovation

ID INTERMITTENTLY HEATED BUILDINGS; REQUIREMENTS; INSULATION; MODEL

AB The building sector in Romania is dominated by residential buildings that are old and have poor thermal performance. As a member of the European Union, Romania has to reach the objectives imposed by the Directive 2009/28/EC and to fulfill the requirements of the Energy Performance of Buildings Directive (EPBD) by year 2020. The implementation of these concepts in Romania consists into thermal rehabilitation of the existing buildings, applying the latest thermal performance characteristics in new buildings and establishing the certificate of energy performance. The following paper presents the literature review of the state of building energy performance in Romania. The purpose of the literature review analysis is to provide a snapshot on the existing building energy efficiency and future perspectives on the implementation of high performance buildings in Romania. The implementation of concepts such as the Passive House (PH), nearly Zero Energy Buildings (nZEB) and Net Zero Energy Buildings (NZEB) are discussed in order to help the decision makers to achieve the 2020 objectives. The results of the reviewed publications and case studies are classified under three categories: policy and regulations, technology and feasibility. Finally a holistic perspective on the Strength, Weakness, Opportunities and Threats (SWOTs) of energy efficiency in Romania's residential building sector is presented.

C1 [Muresan, Adina Ana] Tech Univ Cluj Napoca, Fac Civil Engn, Dept Mech Construct, Cluj Napoca, Romania.

[Muresan, Adina Ana; Attia, Shady] Univ Liege, Fac Appl Sci, Dept ArGEnCo, Sustainable Bldg Design Lab, Liege, Belgium.

RP Muresan, AA (reprint author), Tech Univ Cluj Napoca, Fac Civil Engn, Dept Mech Construct, Cluj Napoca, Romania.

EM Adina.Muresan@mecon.utcluj.ro; shady.attia@ulg.ac.be

RI Attia, Shady/M-4942-2013

OI Attia, Shady/0000-0002-9477-5098

CR Atanasiu B, 2014, POLICY SCENARIOS REC

Badea A, 2014, ENERG BUILDINGS, V80, P542, DOI 10.1016/j.enbuild.2014.04.044

Badescu V, 2003, ENER G BUILDINGS, V35, P1085, DOI 10.1016/j.enbuild.2003.09.004  
Badescu V, 2011, RENEW ENER G, V36, P142, DOI 10.1016/j.renene.2010.06.015  
Badescu V, 2010, ENER GY, V35, P3284, DOI 10.1016/j.energy.2010.04.013  
Baldi MG, 2014, ENER GY PROCED, V62, P723, DOI 10.1016/j.egypro.2014.12.436  
Ballarini I, 2012, ENER G BUILDINGS, V52, P168, DOI 10.1016/j.enbuild.2012.06.004  
Comsit M, 2014, ARCHITECTURALLY INTE, P47  
Eftimie Elena, 2015, International Journal of Energy and Environment, V6, P47  
Eurostat, 2015, HOUS STAT  
Ghiaus C, 2010, ENER G BUILDINGS, V42, P1248, DOI 10.1016/j.enbuild.2010.02.017  
Hazyuk I, 2012, BUILD ENVIRON, V51, P379, DOI 10.1016/j.buildenv.2011.11.009  
Ionescu VGE, 2012, J SUSTAIN ENER GY, V3  
Iordache V, 2011, BUILD ENVIRON, V46, P1115, DOI 10.1016/j.buildenv.2010.11.012  
Jelle BP, 2011, ENER G BUILDINGS, V43, P2549, DOI 10.1016/j.enbuild.2011.05.015  
Memon SA, 2013, ENER G BUILDINGS, V66, P405, DOI 10.1016/j.enbuild.2013.07.056  
Moise B, 2010, ANN CONSTANTIN BRANC, P76  
Musatescu V., 2009, THEORETICAL EMPIRICA, V4, P194  
Nolte I., 2013, IMPLEMENTING COST OP  
Nolte I, 2012, IMPLEMENTING NEARLY  
Pacesila M., 2013, MANAG RES PRACT, V5, P49  
Petrasincu N, 2006, P PLEA2006 23 C PASS  
Popescu D, 2009, ENVIRON ENG MANAG J, V8, P601  
Prada MF, P 11 WSEAS INT C SUS, P246  
Rotar N, 2011, UNIV POLIT BUCHAR S, V73, P287  
Sadineni SB, 2011, RENEW SUST ENER G REV, V15, P3617, DOI 10.1016/j.rser.2011.07.014  
Sage-Lauck JS, 2014, ENER G BUILDINGS, V79, P32, DOI 10.1016/j.enbuild.2014.04.028  
Sarbu I, 2013, ENER G BUILDINGS, V60, P410, DOI 10.1016/j.enbuild.2013.02.005  
Shahbaz M, 2013, RENEW SUST ENER G REV, V18, P165, DOI 10.1016/j.rser.2012.10.012  
Sharp M, 2008, ENER GY SERVICES EURO  
Tanasa C, P PORT SB13 CONTR SU, P161  
Vasiu AR, 2011, 11 C NAT MULT CU PAR, P247

NR 32  
TC 4  
Z9 4  
U1 4  
U2 9

PU PERGAMON-ELSEVIER SCIENCE LTD  
PI OXFORD  
PA THE BOULEVARD, LANGFORD LANE, KIDLINGTON, OXFORD OX5 1GB, ENGLAND  
SN 1364-0321  
J9 RENEW SUST ENER G REV  
JI Renew. Sust. Energ. Rev.  
PD JUL  
PY 2017  
VL 74  
BP 349  
EP 363  
DI 10.1016/j.rser.2017.02.022  
PG 15

WC GREEN & SUSTAINABLE SCIENCE & TECHNOLOGY; Energy & Fuels  
SC Science & Technology - Other Topics; Energy & Fuels  
GA EV1FU  
UT WOS:000401492900026  
DA 2018-05-03  
ER  
FN Clarivate Analytics Web of Science  
VR 1.0  
PT S  
AU Shi, J

- Yu, NP  
 Yao, WX  
 AF Shi, Jie  
 Yu, Nanpeng  
 Yao, Weixin  
 BE Howlett, R  
 Capozzoli, A  
 Serra, V  
 TI Energy efficient building HVAC control algorithm with real-time occupancy prediction  
 SO 8TH INTERNATIONAL CONFERENCE ON SUSTAINABILITY IN ENERGY AND BUILDINGS, SEB-16  
 SE Energy Procedia  
 LA English  
 DT Proceedings Paper  
 CT 8th International Conference on Sustainability in Energy and Buildings (SEB)  
 CY SEP 11-13, 2016  
 CL Politecnico Torino, Turin, ITALY  
 HO Politecnico Torino  
 DE Energy efficient building; HVAC; Occupancy prediction; MPC; Logistic regression  
 ID CLIMATE CONTROL; BEHAVIOR  
 AB A large amount of energy is wasted through inefficient operation of heating, ventilation, and air conditioning (HVAC) system due to the lack of reliable building occupancy measurement and prediction. To mitigate this problem, an innovative change-point logistic regression model is developed to provide an accurate forecast of building occupancy. A novel building HVAC control algorithm is then developed by embedding the occupancy prediction model into the model predictive control (MPC) framework. The occupancy-based MPC algorithm tries to minimize building electricity consumption and maximize building occupants' comfort at the same time. A penalty factor is introduced which allows building occupants to determine the optimal trade-off between comfort and energy efficiency. Numerical simulation results show that the proposed HVAC control strategy with real-time occupancy prediction not only reduces electricity consumption but also improves building occupants' comfort. Published by Elsevier Ltd.
- C1 [Shi, Jie; Yu, Nanpeng] Univ Calif Riverside, Dept Elect & Comp Engn, 900 Univ Ave, Riverside, CA 92507 USA.  
 [Yao, Weixin] Univ Calif Riverside, Dept Stat, 900 Univ Ave, Riverside, CA 92507 USA.
- RP Yu, NP (reprint author), Univ Calif Riverside, Dept Elect & Comp Engn, 900 Univ Ave, Riverside, CA 92507 USA.  
 EM nyu@ece.ucr.edu  
 FU National Science Foundation (NSF) [1637258]; Department of Energy (DOE) [DE-OE0000840]  
 FX The authors would like to thank Dr. Bing Dong from UTSA for sharing residential building occupancy data. This work was supported by National Science Foundation (NSF) under award #1637258 and Department of Energy (DOE) under award #DE-OE0000840.
- CR Aswani A, 2012, P IEEE, V100, P240, DOI 10.1109/JPROC.2011.2161242  
 Avci M, 2013, ENER BUILDINGS, V60, P199, DOI 10.1016/j.enbuild.2013.01.008  
 Boggs P.T., 1995, ACTA NUMER, V4, P1, DOI [DOI 10.1017/S0962492900002518, 10.1017/S0962492900002518]  
 Dobbs JR, 2014, P AMER CONTR CONF, P1057, DOI 10.1109/ACC.2014.6859389  
 Dong B, 2015, SCI TECHNOL BUILT EN, V21, P892, DOI 10.1080/23744731.2015.1040321  
 Dong B, 2014, BUILD SIMUL-CHINA, V7, P89, DOI 10.1007/s12273-013-0142-7  
 Fraisse G, 2002, ENER BUILDINGS, V34, P1017, DOI 10.1016/S0378-7788(02)00019-1  
 Goyal S, 2012, ENER BUILDINGS, V47, P332, DOI 10.1016/j.enbuild.2011.12.005  
 Hosmer Jr DW, 2013, STURDIVANT APPL LOGI  
 Kelman A, 2013, J BUILD PERFORM SIMU, V6, P236, DOI 10.1080/19401493.2012.671959  
 Maasoumy M, 2012, IEEE DESIGN TEST COM, V29

Maasoumy M, 2011, ASME 2011 DYN SYST C, P271  
 Majumdar A, 2014, GREEN COMP C IGCC 20, P1  
 McQuiston FC, 2004, HEATING VENTILATING  
 Oldewurtel F, 2013, APPL ENERG, V101, P521, DOI 10.1016/j.apenergy.2012.06.014  
 Oldewurtel F, 2012, ENERG BUILDINGS, V45, P15, DOI 10.1016/j.enbuild.2011.09.022  
 Pampel F. C., 2000, LOGISTIC REGRESSION  
 van-Aerschot C., 2009, ENERGY EFFICIENCY BU  
 Wei TS, 2016, IEEE T COMPUT, V65, P1392, DOI 10.1109/TC.2015.2495244  
 Yadav AK, 2014, RENEW SUST ENERG REV, V33, P772, DOI 10.1016/j.rser.2013.08.055  
 YALMIP Lofberg J., 2004, COMP AID CONTR SYST, P284  
 Yu NP, 2015, IEEE INT CON AUTO SC, P1300, DOI 10.1109/CoASE.2015.7294278  
 Zhang Y., 2006, HVAC&R RES, V12, P739

NR 23

TC 4

Z9 4

U1 2

U2 3

PU ELSEVIER SCIENCE BV

PI AMSTERDAM

PA SARA BURGERHARTSTRAAT 25, PO BOX 211, 1000 AE AMSTERDAM, NETHERLANDS

SN 1876-6102

J9 ENRGY PROCED

PY 2017

VL 111

BP 277

EP 286

DI 10.1016/j.egypro.2017.03.028

PG 10

WC GREEN & SUSTAINABLE SCIENCE & TECHNOLOGY; Energy & Fuels

SC Science & Technology - Other Topics; Energy & Fuels

GA BH4TC

UT WOS:000400643800028

OA gold

DA 2018-05-03

ER

PT J

AU Zhao, D

McCoy, AP

Du, J

Agee, P

Lu, YJ

AF Zhao, Dong

McCoy, Andrew P.

Du, Jing

Agee, Philip

Lu, Yujie

TI Interaction effects of building technology and resident behavior on  
 energy consumption in residential buildings

SO ENERGY AND BUILDINGS

LA English

DT Article

DE Energy efficiency; High-performance housing; Building construction  
 technology; Building systems; Human-environmental interaction

ID COMMERCIAL BUILDINGS; FEEDBACK; INFORMATION; REGRESSION; CLIMATE;  
 IMPACT; TOOL; HOT; US

AB Buildings account for a significant portion of energy consumption and carbon emissions around the  
 world and increasingly scholars and practitioners are re-thinking strategies that mitigate use. This paper



reports an empirical study aimed at identifying the relationship between building technology and resident behavior and the joint effects on energy consumption in residential buildings. Unlike previous work that isolated effects of technology or behavior on energy consumption, this study investigates their interactions. The researchers collected technical and behavioral data from more than 300 residential units and performed data analysis using energy simulation and multivariate regression techniques. Results identify the interaction effects between building technology and resident behavior and provide quantifiable evidence supporting the hypothesis that "building technology and resident behaviors interact with each other and ultimately affect home energy consumption." Findings indicate four important resident behaviors that directly correlate to energy consumption and two that indirectly correlate to energy consumption. The research also indicates that only 42% of technological advances directly contribute to home energy efficiency, suggesting that the achievable impact on energy savings depends on both technical advances and behavioral plasticity. (C) 2016 Elsevier B.V. All rights reserved.

C1 [Zhao, Dong] Michigan State Univ, Sch Planning Design & Construct, E Lansing, MI 48824 USA.

[McCoy, Andrew P.; Agee, Philip] Virginia Tech, Myers Lawson Sch Construct, Blacksburg, VA 24061 USA.

[Du, Jing] Texas A&M Univ, Dept Construct Sci, College Stn, TX 77843 USA.

[Lu, Yujie] Natl Univ Singapore, Dept Bldg, Singapore, Singapore.

RP Zhao, D (reprint author), Michigan State Univ, Sch Planning Design & Construct, E Lansing, MI 48824 USA.

EM dzhao@msu.edu

OI Zhao, Dong/0000-0002-2404-7669

CR Abrahamse W, 2007, J ENVIRON PSYCHOL, V27, P265, DOI 10.1016/j.jenvp.2007.08.002

Amiri SS, 2015, ENERG BUILDINGS, V109, P209, DOI 10.1016/j.enbuild.2015.09.073

Beheiry SMA, 2006, J CONSTR ENG M ASCE, V132, P384, DOI 10.1061/(ASCE)0733-9364(2006)132:4(384)

Brandemuehl M., 2011, 12 C INT BUILD PERF, P14

Chen SQ, 2015, ENERG BUILDINGS, V104, P1, DOI 10.1016/j.enbuild.2015.06.075

Ek K, 2010, ENERG POLICY, V38, P1578, DOI 10.1016/j.enpol.2009.11.041

Fischer C, 2008, ENERG EFFIC, V1, P79, DOI 10.1007/s12053-008-9009-7

Fitzmaurice G, 2000, NUTRITION, V16, P313, DOI 10.1016/S0899-9007(99)00293-2

Gulbinas R, 2014, ENERG BUILDINGS, V84, P493, DOI 10.1016/j.enbuild.2014.08.017

Gunay HB, 2014, BUILD ENVIRON, V81, P396, DOI 10.1016/j.buildenv.2014.07.020

Hoak D.E., 2008, ENERGY EFFICIENT ARE

Hox JJ, 2010, MULTILEVEL ANAL TECH

Hygh JS, 2012, BUILD ENVIRON, V57, P165, DOI 10.1016/j.buildenv.2012.04.021

Jones S, 2016, WORLD GREEN BUILDING

Keefe M., 2014, 2 ANN RES BUILD DES

Kibert C.J., 2008, SUSTAINABLE CONSTRUCT

Lee A.D., 1995, AFFORDABLE HOUSING R

Mosteiro-Romero M, 2014, ENERG BUILDINGS, V68, P620, DOI 10.1016/j.enbuild.2013.09.046

Mosteller F., 1977, ADDISON WESLEY SERIE

Nathans L. L., 2012, PRACTICAL ASSESSMENT, V17, P1

Ouyang JL, 2009, ENERG BUILDINGS, V41, P711, DOI 10.1016/j.enbuild.2009.02.003

Parker D., 2012, P 2012 ACEEE SUMM ST

Parker DS, 2003, ENERG BUILDINGS, V35, P863, DOI 10.1016/S0378-7788(02)00244-X

Peng C, 2012, BUILD SIMUL-CHINA, V5, P85, DOI 10.1007/s12273-011-0049-0

Pfeiffer A, 2005, ENERG BUILDINGS, V37, P1158, DOI 10.1016/j.enbuild.2005.06.018

Polly B., 2011, ASSESSING IMPROVING

RESNET, 2015, 3012014 RESNET ANSI

Santin OG, 2009, ENERG BUILDINGS, V41, P1223, DOI 10.1016/j.enbuild.2009.07.002

Sawhney A., 2002, PRACT PERIOD STRUCT, V7, P174

Schwartz T, 2014, INTERACT COMPUT

Snijders TA, 2011, MULTILEVEL ANAL

Stern Paul C., 2014, ENERGY RES SOC SCI, V1, P41, DOI [10.1016/j.erss.2014.03.003, DOI 10.1016/J.ERSS.2014.03.003]

Tian W, 2013, RENEW SUST ENERG REV, V20, P411, DOI 10.1016/j.rser.2012.12.014

U. S. Census Bureau, 2014, AM HOUS SURV AHS 201

US Department of Energy, 2011, BUILD EN DAT BOOK

U. S. Department of Energy, 2015, BUILD EFF 2015

U. S. Energy Information Administration, 2016, EL DAT 2016  
 Walsh K., 2003, J ARCHIT ENG, V9  
 Williamson T., 2006, PLEA 2006 23 C PASS  
 Xu XQ, 2012, ENERGBUILDINGS, V55, P637, DOI 10.1016/j.enbuild.2012.09.013  
 Yudelson J., 2012, GREEN BUILDING TREND  
 Zain ZM, 2007, DESALINATION, V209, P261, DOI 10.1016/j.desal.2007.04.036  
 ZHAO D, 2016, PROCEDIA ENGINEER, V145, P766, DOI DOI 10.1016/J.PR0ENG.2016.04.100  
 Zhao D, 2016, J CONSTR ENG M, V142, DOI 10.1061/(ASCE)CO.1943-7862.0001036  
 Zhao D, 2015, J ARCHIT ENG, V21, DOI 10.1061/(ASCE)AE.1943-5568.0000177

NR 45

TC 4

Z9 4

U1 4

U2 25

PU ELSEVIER SCIENCE SA

PI LAUSANNE

PA PO BOX 564, 1001 LAUSANNE, SWITZERLAND

SN 0378-7788

EI 1872-6178

J9 ENERGBUILDINGS

J1 Energy Build.

PD JAN 1

PY 2017

VL 134

BP 223

EP 233

DI 10.1016/j.enbuild.2016.10.049

PG 11

WC Construction & Building Technology; Energy & Fuels; Engineering, Civil

SC Construction & Building Technology; Energy & Fuels; Engineering

GA EF9BD

UT WOS:000390624800020

DA 2018-05-03

ER

PT J

AU Taillandier, F

Mora, L

Breysse, D

AF Taillandier, Franck

Mora, Laurent

Breysse, Denys

TI Decision support to choose renovation actions in order to reduce house

energy consumption - An applied approach

SO BUILDING AND ENVIRONMENT

LA English

DT Article

DE Decision support; Energy performance; House renovation; Multicriteria

decision-making

ID INSULATION MATERIALS; BUILDING RENOVATION; GENETIC ALGORITHM; DESIGN

OPTIMIZATION; BEHAVIOR; TOOL; TECHNOLOGY; ACCEPTANCE; MODEL;

SUSTAINABILITY

AB This paper focuses on improving the thermal performances of a set of houses built around 1970 and aims to develop a method for decision support regarding the choice of renovation solutions. The approach goes through two steps based on a multicriteria analysis. The first step allows the owner to choose a work package that meets his expectations at best. The second step is to specify the selected works by providing more detailed technical solutions, like defining the type of insulation (glass wool, sheep wool, etc.). The solution assessment on the various criteria is performed according to models, expert values or rules set by

the experts involved in the project. One of the major challenges of the decision tool is to enable a merging of the project stakeholder points of view, based on a deep interaction between experts and owners. The output is not limited to the prescription of a renovation solution but enriches the house owner reflection in order to guide her/him into the whole renovation process. The article presents the approach, the method and an application to a house. (C) 2016 Elsevier Ltd. All rights reserved.

C1 [Taillandier, Franck; Mora, Laurent; Breyse, Denys] Univ Bordeaux, I2M, UMR 5295, F-33400 Talence, France.

RP Taillandier, F (reprint author), Univ Bordeaux, I2M, UMR 5295, F-33400 Talence, France.

EM franck.taillandier@u-bordeaux.fr

OI MORA, Laurent/0000-0001-5610-6101

FU Aquitaine region (France)

FX The ARD-FOURMI tool is the collective result of the FOURMINERGIE project team work. The authors thank all those who participated in the project, including VALOREM (project leader), NOBATEK (thermal simulation), Michel Sarrazin (construction economist), Alexandra Georgeliani (architect) and co-operators of the association "Des fourmis dans le compteur" who actively participated in the creation and improvement of the tool, the Aquitaine region (France) that funded the project and the Creand cluster.

CR Abrahamsson P., 2002, AGILE SOFTWARE DEV M, P478

Almeida M, 2015, ENRGY PROCED, V78, P2403, DOI 10.1016/j.egypro.2015.11.203

Anastaselos D, 2009, ENRG BUILDINGS, V41, P1165, DOI 10.1016/j.enbuild.2009.06.003

Arroyo P., 2014, EXPLORING DECISION M

Bernard HR, 2010, ANAL QUALITATIVE DAT

Caldas LG, 2002, AUTOMAT CONSTR, V11, P173, DOI 10.1016/S0926-5805(00)00096-0

Cali D, 2016, ENRG BUILDINGS, V127, P1146, DOI 10.1016/j.enbuild.2016.05.020

CGDD, 2012, REP CHIFFR CLEFS EN

Chantrelle FP, 2011, APPL ENRG, V88, P1386, DOI 10.1016/j.apenergy.2010.10.002

Cinelli M, 2014, ECOL INDIC, V46, P138, DOI 10.1016/j.ecolind.2014.06.011

CSTB, 2015, BAS NAT FRANC REF IM

DAVIS FD, 1989, MANAGE SCI, V35, P982, DOI 10.1287/mnsc.35.8.982

Desmedt J, 2009, J CLEAN PROD, V17, P455, DOI 10.1016/j.jclepro.2008.08.017

DGCE, 2011, DIR GEN EN CLIM SCEN

Davis A., 2006, P 14 IEEE INT C

EC EUROPEAN COMMISSION, 2014, EN PRIC COSTS EUROPE

Erlandsson M, 2003, BUILD ENVIRON, V38, P919, DOI 10.1016/S0360-1323(03)00031-3

Friedman C, 2014, ENERGY, V77, P183, DOI 10.1016/j.energy.2014.06.019

Gorgolewski M, 1996, APPL ENRG, V53, P365, DOI 10.1016/0306-2619(95)00067-4

Govindan K, 2016, EUR J OPER RES, V250, P1, DOI 10.1016/j.ejor.2015.07.019

Gram-Hanssen K, 2014, BUILD RES INF, V42, P393, DOI 10.1080/09613218.2014.911572

GUAGNANO GA, 1995, ENVIRON BEHAV, V27, P699, DOI 10.1177/0013916595275005

Guitouni A, 1998, EUR J OPER RES, V109, P501, DOI 10.1016/S0377-2217(98)00073-3

Hickey A. M., 2003, REQ ENG C 2003 P 11

Hoes P, 2009, ENRG BUILDINGS, V41, P295, DOI 10.1016/j.enbuild.2008.09.008

Ishizaka A, 2013, MULTICRITERIA DECISI

[Anonymous], 2006, 14040 ISO

Itard I., 2008, BUILDING RENOVATION

Juan YK, 2010, ENRG BUILDINGS, V42, P290, DOI 10.1016/j.enbuild.2009.09.006

Juan YK, 2006, EXPERT SYST APPL, V31, P83, DOI 10.1016/j.eswa.2005.09.010

Jugert P, 2016, J ENVIRON PSYCHOL, V48, P12, DOI 10.1016/j.jenvp.2016.08.003

Katalinic B., 2014, PROCEDIA ENG, V69, P911

KBOB, 2014, DONN EC CONSTR

Liang HH, 2007, CONSTR BUILD MATER, V21, P1254, DOI 10.1016/j.conbuildmat.2006.05.051

Liu P, 2010, ENRG POLICY, V38, P4224, DOI 10.1016/j.enpol.2010.03.051

Mansour E, 2014, ENVIRON INT, V73, P402, DOI 10.1016/j.envint.2014.08.004

Martinaitis V, 2007, ENRG POLICY, V35, P192, DOI 10.1016/j.enpol.2005.11.003

Mjornell K, 2014, SUSTAINABILITY-BASEL, V6, P4227, DOI 10.3390/su6074227

Moezzi M., 2010, ACEEE SUMMER STUDY E

- Nielsen AN, 2016, BUILD ENVIRON, V103, P165, DOI 10.1016/j.buildenv.2016.04.009  
Ott W, 2015, ENRGY PROCED, V78, P2340, DOI 10.1016/j.egypro.2015.11.395  
Pasanisi Alberto, 2008, Foundations of Computing and Decision Sciences, V33, P71  
Pelletier P., 2008, COMITE OPERATIONNEL  
Peuportier B., 1990, International Journal of Solar Energy, V8, P109, DOI 10.1080/01425919008909714  
Ramirez-Villegas R, 2016, BUILD ENVIRON, V97, P26, DOI 10.1016/j.buildenv.2015.12.012  
Roberts BC, 2015, ENERGBUILDINGS, V105, P358, DOI 10.1016/j.enbuild.2015.07.063  
Roy B., 1990, OUTRANKING APPROACH, P155  
Roy B, 2010, EUR J OPER RES, V200, P629, DOI 10.1016/j.ejor.2008.12.036  
Ryan EM, 2012, ENERGBUILDINGS, V47, P375, DOI 10.1016/j.enbuild.2011.12.020  
SAATY T L, 1980, ANAL HIERARCHY PROCE  
Santin OG, 2009, ENERGBUILDINGS, V41, P1223, DOI 10.1016/j.enbuild.2009.07.002  
Schiavoni S, 2016, RENEW SUST ENER REV, V62, P988, DOI 10.1016/j.rser.2016.05.045  
Shove E, 2010, ENVIRON PLANN A, V42, P1273, DOI 10.1068/a42282  
Stec AA, 2011, ENERGBUILDINGS, V43, P498, DOI 10.1016/j.enbuild.2010.10.015  
Stern PC, 2000, J SOC ISSUES, V56, P407, DOI 10.1111/0022-4537.00175  
Taillandier F., 2013, 31 RENC AUGC CACH FR  
Taillandier P, 2012, EUR J OPER RES, V217, P633, DOI 10.1016/j.ejor.2011.10.004  
Tervonen T, 2009, EUR J OPER RES, V192, P236, DOI 10.1016/j.ejor.2007.09.008  
Thøgersen J., 1995, J CONSUMER POLICY, V18, P345  
Venkatesh V, 2008, DECISION SCI, V39, P273, DOI 10.1111/j.1540-5915.2008.00192.x  
Verbeeck G, 2010, BUILD ENVIRON, V45, P1037, DOI 10.1016/j.buildenv.2009.10.012  
Wallace LG, 2014, INFORM MANAGE-AMSTER, V51, P249, DOI 10.1016/j.im.2013.12.003  
Wang HJ, 2010, EXPERT SYST APPL, V37, P1241, DOI 10.1016/j.eswa.2009.06.034  
Wang WM, 2005, BUILD ENVIRON, V40, P1512, DOI 10.1016/j.buildenv.2004.11.017  
Wright JA, 2002, ENERGBUILDINGS, V34, P959, DOI 10.1016/S0378-7788(02)00071-3  
Xu J, 2015, ENERGBUILDINGS, V89, P87, DOI 10.1016/j.enbuild.2014.12.022  
Zagorskas J, 2014, ENERGBUILDINGS, V78, P35, DOI 10.1016/j.enbuild.2014.04.010  
Zanakis SH, 1998, EUR J OPER RES, V107, P507, DOI 10.1016/S0377-2217(97)00147-1  
Zhang ZH, 2006, BUILD ENVIRON, V41, P669, DOI 10.1016/j.buildenv.2005.02.028  
Znouda E, 2007, ENERGBUILDINGS, V39, P148, DOI 10.1016/j.enbuild.2005.11.015

NR 70

TC 4

Z9 4

U1 4

U2 12

PU PERGAMON-ELSEVIER SCIENCE LTD

PI OXFORD

PA THE BOULEVARD, LANGFORD LANE, KIDLINGTON, OXFORD OX5 1GB, ENGLAND

SN 0360-1323

EI 1873-684X

J9 BUILD ENVIRON

J1 Build. Environ.

PD NOV 15

PY 2016

VL 109

BP 121

EP 134

DI 10.1016/j.buildenv.2016.09.019

PG 14

WC Construction & Building Technology; Engineering, Environmental;  
Engineering, Civil

SC Construction & Building Technology; Engineering

GA EA2CU

UT WOS:000386401200011

DA 2018-05-03

ER

PT J

AU Kenway, SJ

Binks, A

Scheidegger, R

Bader, HP

Pamminger, F

Lant, P

Taimre, T

AF Kenway, Steven J.

Binks, Amanda

Scheidegger, Ruth

Bader, Hans-Peter

Pamminger, Francis

Lant, Paul

Taimre, Thomas

TI Household analysis identifies water-related energy efficiency opportunities

SO ENERGY AND BUILDINGS

LA English

DT Article

ID CITIES; FLOW; METABOLISM; EMISSIONS; MODEL

AB Water heating accounts for around one third of household direct energy use. This energy demand is some four times greater than lighting. Here we use detailed monitoring and modelling of seven individual households to quantify major factors. Using normalized sensitivity results we demonstrate (i) high variability and (ii) a large and consistent influence of shower duration, flow rate, frequency and temperature along with hot water system efficiency, adult population, and the temperature of cold water. A 10% change in these factors influenced 0.1-0.9 kWh/hh-person, equivalent to a 2-3% of total household energy use. We draw on 5399 shower events from a further 94 households, and 491 shower temperature measurements to understand the scope for changes to the households. Individual parameters variation guided by these larger datasets demonstrated shower duration and flow rate offer most scope for change. The work helps guide city-scale analysis of household water-related energy demand. It also supports the tailoring of behavioural and technological water-efficiency programs towards those with strongest potential to influence energy. Strong interaction between parameters suggests that programs aiming to influence water-related energy need to be aware of how this interplay either amplifies, or diminishes, the intended energy savings. Crown Copyright (C) 2016 Published by Elsevier B.V. All rights reserved.

C1 [Kenway, Steven J.; Binks, Amanda; Lant, Paul; Taimre, Thomas] Univ Queensland, Brisbane, Qld, Australia.

[Scheidegger, Ruth; Bader, Hans-Peter] Swiss Fed Inst Aquat Sci & Technol, Eawag, Dübendorf, Switzerland.

[Pamminger, Francis] Yarra Valley Water, Melbourne, Vic, Australia.

RP Kenway, SJ (reprint author), Univ Queensland, Brisbane, Qld, Australia.

EM s.kenway@uq.edu.au

RI Kenway, Steven/J-8031-2013

OI Kenway, Steven/0000-0002-2095-9388

FU Australian Research Council; Smart Water Research Fund [LP120200745, DE160101322]

FX The authors acknowledge the support of the Australian Research Council and Smart Water Research Fund (Grant Numbers LP120200745 and DE160101322). We thank ETH Bits to Energy Lab for provision of Amphiro Meters, our industry partners (Yarra Valley Water, South East Water, and City West Water) for input to the study, and Peter Roberts in particular. Kristiane Fox for her input to analysis of Amphiro data and several anonymous reviewers for comments on earlier drafts.

CR Arpke A, 2006, J IND ECOL, V10, P169, DOI 10.1162/108819806775545312

AWE ACEEE, 2011, ADDR EN WAT NEX BLUE

Baccini P, 1991, METABOLISM ANTHROPOS

Bach PM, 2014, ENVIRON MODELL SOFTW, V54, P88, DOI 10.1016/j.envsoft.2013.12.018

Binks AN, 2016, J CLEAN PROD, V135, P892, DOI 10.1016/j.jclepro.2016.06.091

Cheng CL, 2002, ENER BUILDINGS, V34, P261, DOI 10.1016/S0378-7788(01)00097-4  
Commonwealth of Australia, 2008, EN US AUSTR RES SECT  
Decker EH, 2000, ANNU REV ENER ENV, V25, P685, DOI 10.1146/annurev.energy.25.1.685  
Fischer-Kowalski M., 1998, J IND ECOL, V2, P30  
Flower D. J. M., 2009, INTEGRATED APPROACH  
Flower D.J.M., 2009, INTEGRATED APPROACH, P373  
Hall MR, 2011, ENVIRON SCI TECHNOL, V45, P5434, DOI 10.1021/es103939a  
Huang DB, 2007, J ENVIRON MANAGE, V84, P49, DOI 10.1016/j.jenvman.2006.05.004  
Jacobs HE, 2004, WATER SA, V30, P293  
Kennedy C, 2011, ENVIRON POLLUT, V159, P1965, DOI 10.1016/j.envpol.2010.10.022  
Kenway S., 2011, J WATER CLIM CHANGE, V2  
Kenway SJ, 2015, ENVIRON MODELL SOFTW, V73, P272, DOI 10.1016/j.envsoft.2015.08.009  
Kenway SJ, 2011, J WATER CLIM CHANGE, V2, P247, DOI 10.2166/wcc.2011.005  
Kenway SJ, 2011, WATER SCI TECHNOL, V63, P1983, DOI 10.2166/wst.2011.070  
Kenway S.J., 2014, WATER, P111  
Kenway SJ, 2013, ENER BUILDINGS, V58, P378, DOI 10.1016/j.enbuild.2012.08.035  
Klein G., 2005, CALIFORNIA'S WATER EN  
Kwonpongsagoon S, 2007, CLEAN TECHNOL ENVIR, V9, P313, DOI 10.1007/s10098-007-0095-6  
National Water Commission, 2014, NAT PERF REP 2012 13  
Pakula C, 2010, ENER EFFIC, V3, P365, DOI 10.1007/s12053-009-9072-8  
Pamminger F., 2008, WATER, V35, P28  
PMSEIC, 2010, CHALL EN WAT CARB IN  
Roberts P., 2012, END USE STUDY SUMMER  
Rothausen SGSA, 2011, NAT CLIM CHANGE, V1, P210, DOI 10.1038/NCLIMATE1147  
Schaffner M, 2009, SCI TOTAL ENVIRON, V407, P4902, DOI 10.1016/j.scitotenv.2009.05.007  
Tiefenbeck V., 2014, EFFECTIVENESS REAL T  
WBCSD (World Business Council on Sustainable Development), 2009, WAT EN CLIM CHANG CO  
Wolff G., 2011, STATEWIDE ASSESSMENT  
WOLMAN A, 1965, SCI AM, V213, P179

NR 34

TC 4

Z9 4

U1 0

U2 5

PU ELSEVIER SCIENCE SA

PI LAUSANNE

PA PO BOX 564, 1001 LAUSANNE, SWITZERLAND

SN 0378-7788

EI 1872-6178

J9 ENER BUILDINGS

J1 Energy Build.

PD NOV 1

PY 2016

VL 131

BP 21

EP 34

DI 10.1016/j.enbuild.2016.09.008

PG 14

WC Construction & Building Technology; Energy & Fuels; Engineering, Civil

SC Construction & Building Technology; Energy & Fuels; Engineering

GA EA5ES

UT WOS:000386642800002

DA 2018-05-03

ER

PT J

AU Xie, Q

Ouyang, HB

- Gao, X  
 AF Xie, Qing  
 Ouyang, Hongbing  
 Gao, Xiang  
 TI Estimation of electricity demand in the residential buildings of China  
 based on household survey data  
 SO INTERNATIONAL JOURNAL OF HYDROGEN ENERGY  
 LA English  
 DT Article; Proceedings Paper  
 CT 4th International Conference on Energy Engineering and Environment  
 Engineering (ICEEEE),  
 CY APR 15-16, 2016  
 CL Hong Kong, PEOPLES R CHINA  
 DE Electricity demand estimation; Building & appliance; Family features;  
 Indoor thermal comfort; Principal component analysis; Multiple linear  
 regression  
 ID THERMAL COMFORT; ENERGY DEMAND; CONSUMPTION; OPTIMIZATION; TURKEY  
 AB This study proposes an innovative hybrid model for estimation of residential electricity demand based on  
 the three categories of variables as building & appliances, family features and householders' evaluation  
 about indoor thermal comfort. The principal component analysis method and multiple linear regression  
 method are used in the model. The empirical results indicate that the thermal environment rated as neutral  
 or slightly warm by householder has a positive coefficient with residential electricity demand. And  
 building & appliances, especially the sets of split air conditioner, equipment operation time and room area  
 have significant impact on residential electricity demand. However, the influences of family features  
 related variables on household electricity consumption are limited in short run, wherein income has a  
 certain effect on household electricity consumption. This study delivered the energy management strategy  
 implications that the insulated building envelop should be further implemented and the government  
 should guide householder to install energy-efficient home appliances and set the indoor temperature  
 within a proper range. (C) 2016 Hydrogen Energy Publications LLC. Published by Elsevier Ltd. All rights  
 reserved.  
 C1 [Xie, Qing; Ouyang, Hongbing; Gao, Xiang] Huazhong Univ Sci & Technol, Sch Econ, Wuhan 430074,  
 Peoples R China.  
 [Gao, Xiang] Huazhong Univ Sci & Technol, Sch Energy & Power Engn, Wuhan 430074, Peoples R China.  
 RP Ouyang, HB (reprint author), Huazhong Univ Sci & Technol, Sch Econ, Wuhan 430074, Peoples R China.  
 EM ouyanghb@hust.edu.cn  
 CR Chen GQ, 2010, ENERG POLICY, V38, P6180, DOI 10.1016/j.enpol.2010.06.004  
 Chen X, 2015, ENERG BUILDINGS, V102, P357, DOI 10.1016/j.enbuild.2015.06.002  
 Dergiades T, 2008, ENERG ECON, V30, P2722, DOI 10.1016/j.eneco.2008.05.005  
 Dianshu F, 2010, ENERG POLICY, V38, P1202, DOI 10.1016/j.enpol.2009.11.012  
 Fan H, 2015, ENERG BUILDINGS, V105, P9, DOI 10.1016/j.enbuild.2015.07.030  
 Fanger P. O., 1970, THERMAL COMFORT ANAL  
 Gagge A.P., 1972, P CIB COMM W45 HUM R, P229  
 Halicioglu F, 2007, ENERG ECON, V29, P199, DOI 10.1016/j.eneco.2006.11.007  
 He YX, 2014, ENERG CONVERS MANAGE, V80, P429, DOI 10.1016/j.enconman.2014.01.052  
 Hondroyannis G, 2004, ENERG ECON, V26, P319, DOI 10.1016/j.eneco.2004.04.001  
 Kiran MS, 2012, ENERG CONVERS MANAGE, V53, P75, DOI 10.1016/j.enconman.2011.08.004  
 Mostafavi ES, 2013, ENERG CONVERS MANAGE, V74, P548, DOI 10.1016/j.enconman.2013.06.031  
 Murata A, 2008, APPL ENERG, V85, P1113, DOI 10.1016/j.apenergy.2007.05.008  
 Narayan PK, 2007, ENERG POLICY, V35, P4485, DOI 10.1016/j.enpol.2007.03.018  
 Shayeghi H, ENERGY CONVERS MANAG  
 Singhal D, 2011, INT J ELEC POWER, V33, P550, DOI 10.1016/j.ijepes.2010.12.009  
 \*WORLD BANK, 2013, WORLD DEV IND, DOI DOI 10.1596/978-0-8213-9575-2  
 Yang L, 2014, APPL ENERG, V115, P164, DOI 10.1016/j.apenergy.2013.10.062  
 Yu SW, 2012, ENERG CONVERS MANAGE, V61, P59, DOI 10.1016/j.enconman.2012.03.016  
 Zachariadis T, 2007, ENERG ECON, V29, P183, DOI 10.1016/j.eneco.2006.05.002  
 Zhou SJ, 2013, ENERG POLICY, V61, P394, DOI 10.1016/j.enpol.2013.06.092  
 Ziramba E, 2008, ENERG POLICY, V36, P3460, DOI 10.1016/j.enpol.2008.05.026  
 NR 22

TC 4  
Z9 4  
U1 0  
U2 11  
PU PERGAMON-ELSEVIER SCIENCE LTD  
PI OXFORD  
PA THE BOULEVARD, LANGFORD LANE, KIDLINGTON, OXFORD OX5 1GB, ENGLAND  
SN 0360-3199  
EI 1879-3487  
J9 INT J HYDROGEN ENERG  
JI Int. J. Hydrog. Energy  
PD SEP 21  
PY 2016  
VL 41  
IS 35  
SI SI  
BP 15879  
EP 15886  
DI 10.1016/j.ijhydene.2016.03.152  
PG 8  
WC Chemistry, Physical; Electrochemistry; Energy & Fuels  
SC Chemistry; Electrochemistry; Energy & Fuels  
GA DV5YL  
UT WOS:000383006500037  
DA 2018-05-03  
ER

PT J  
AU Gabe-Thomas, E  
Walker, I  
Verplanken, B  
Shaddick, G  
AF Gabe-Thomas, Elizabeth  
Walker, Ian  
Verplanken, Bas  
Shaddick, Gavin  
TI Householders' Mental Models of Domestic Energy Consumption: Using a  
Sort-And-Cluster Method to Identify Shared Concepts of Appliance  
Similarity

SO PLOS ONE

LA English

DT Article

ID CLIMATE-CHANGE POLICY; SOCIAL-CHANGE; AWARENESS; FEEDBACK; BEHAVIOR

AB If in-home displays and other interventions are to successfully influence people's energy consumption, they need to communicate about energy in terms that make sense to users. Here we explore householders' perceptions of energy consumption, using a novel combination of card-sorting and clustering to reveal shared patterns in the way people think about domestic energy consumption. The data suggest that, when participants were asked to group appliances which they felt naturally 'went together', there are relatively few shared ideas about which appliances are conceptually related. To the extent participants agreed on which appliances belonged together, these groupings were based on activities (e.g., entertainment) and location within the home (e.g., kitchen); energy consumption was not an important factor in people's categorisations. This suggests messages about behaviour change aimed at reducing energy consumption might better be tied to social practices than to consumption itself.

C1 [Gabe-Thomas, Elizabeth] Univ Plymouth, Peninsular Sch Med & Dent, Plymouth PL4 8AA, Devon, England.

[Gabe-Thomas, Elizabeth] Univ Bath, Dept Psychol, Bath BA2 7AY, Avon, England.

[Walker, Ian; Verplanken, Bas; Shaddick, Gavin] Univ Bath, Dept Math Sci, Bath BA2 7AY, Avon, England.



- RP Gabe-Thomas, E (reprint author), Univ Plymouth, Peninsular Sch Med & Dent, Plymouth PL4 8AA, Devon, England.; Gabe-Thomas, E (reprint author), Univ Bath, Dept Psychol, Bath BA2 7AY, Avon, England.
- EM elizabeth.gabe-thomas@plymouth.ac.uk
- OI Verplanken, Bas/0000-0001-7217-0293; Walker, Ian/0000-0002-0079-3149; Gabe-Thomas, Elizabeth/0000-0003-3249-1011
- FU Engineering and Physical Sciences Research Council (EPSRC) [EP/K002724/1]
- FX This work was supported by Engineering and Physical Sciences Research Council (EPSRC) EP/K002724/1, <http://gow.epsrc.ac.uk/NGBOViewGrant.aspx?GrantRef=EP/K002724/1> to BV and IW. The funders had no role in study design, data collection and analysis, decision to publish, or preparation of the manuscript.
- CR Alahmad MA, 2012, IEEE T IND ELECTRON, V59, P2002, DOI 10.1109/TIE.2011.2165456
- Allen D., 2006, P ACEEE 2006 SUMM ST, V7, P1
- Attari SZ, 2010, P NATL ACAD SCI USA, V107, P16054, DOI 10.1073/pnas.1001509107
- Aune M, 2007, ENERG POLICY, V35, P5457, DOI 10.1016/j.enpol.2007.05.007
- BAIRD JC, 1981, J APPL PSYCHOL, V66, P90
- Barnett J, 2004, DOING SOCIAL PSYCHOL, P289
- Bostrom A, 1994, WHAT DO PEOPLE KNOW, V14
- Brounen D, 2013, ENERG ECON, V38, P42, DOI 10.1016/j.eneco.2013.02.008
- Brounen D, 2012, EUR ECON REV, V56, P931, DOI 10.1016/j.eurocorev.2012.02.007
- Buchanan K, 2015, ENERG POLICY, V77, P89, DOI 10.1016/j.enpol.2014.12.008
- Burgess J, 2008, ENERG POLICY, V36, P4454, DOI 10.1016/j.enpol.2008.09.039
- Burns R. B., 2009, BUSINESS RES METHODS, P552
- Canter D V, 1996, DARTMOUTH BENCHMARK, P71
- Chiang T, 2014, ENERG BUILDINGS, V70, P507, DOI 10.1016/j.enbuild.2013.10.035
- Chiang T, 2012, ENERG BUILDINGS, V55, P471, DOI 10.1016/j.enbuild.2012.07.026
- Chisik Y., 2011, LNCS, P100
- Coxon A.P.M., 1999, SORTING DATA COLLECT
- DANIELS K, 1995, HUM RELAT, V48, P975, DOI 10.1177/001872679504800901
- Darby S, 2006, EFFECTIVENESS FEEDBA
- Delmas MA, 2013, ENERG POLICY, V61, P729, DOI 10.1016/j.enpol.2013.05.109
- Eppel S, 2013, RESOUR CONSERV RECY, V79, P30, DOI 10.1016/j.resconrec.2013.06.001
- Fischer C, 2008, ENERG EFFIC, V1, P79, DOI 10.1007/s12053-008-9009-7
- Frederick SW, 2011, P NATL ACAD SCI USA, V108, pE23, DOI 10.1073/pnas.1014806108
- Gram-Hanssen K, 2011, J CONSUM CULT, V11, P61, DOI 10.1177/1469540510391725
- Gram-Hanssen K, 2010, J IND ECOL, V14, P150, DOI 10.1111/j.1530-9290.2009.00194.x
- Groat L., 1982, J ENVIRON PSYCHOL, V2, P3, DOI [10.1016/S0272-4944(82)80002-9, DOI 10.1016/S0272-4944(82)80002-9]
- Kurz T., 2014, WILEY INTERDISCIP RE, V6, P113, DOI DOI 10.1002/WCC.327
- Mack Z, 2009, ERGONOMICS, V52, P1514, DOI 10.1080/00140130903197446
- Mayne R, 2012, INDIVIDUAL SOCIAL IN
- MEDIN DL, 1984, ANNU REV PSYCHOL, V35, P113, DOI 10.1146/annurev.ps.35.020184.000553
- Mooi E, 2011, CONCISE GUIDE TO MARKET RESEARCH: THE PROCESS, DATA, AND METHODS USING IBM SPSS STATISTICS, P1, DOI 10.1007/978-3-642-12541-6
- Mora C, 2013, NATURE, V502, P183, DOI 10.1038/nature12540
- Norusis MJ, 2012, IBM SPSS STAT 19 STA, P202
- Pullinger M., 2013, PATTERNS WATER WATER
- R Core Team, 2014, R LANG ENV STAT COMP
- Rosenberg S, 1975, MULTIVARIATE BEHAV R
- Ross BH, 2013, THINKING PROBLEM SOL, P119
- Shove E., 2003, CONVERGING CONVENTIO
- Shove E, 2011, ENVIRON PLANN A, V43, P262, DOI 10.1068/a43484
- Shove E, 2010, ENVIRON PLANN A, V42, P1273, DOI 10.1068/a42282
- Tamasauskas D, 2012, HYBRID INTELLIGENT S, P421
- Thogersen J, 2010, ENERG POLICY, V38, P7732, DOI 10.1016/j.enpol.2010.08.025
- Toth N, 2013, J ENVIRON PSYCHOL, V34, P36, DOI 10.1016/j.jenvp.2012.12.001

Tullis T, 2004, P US PROF ASS MINN M, P1  
 WARD JH, 1963, J AM STAT ASSOC, V58, P236, DOI 10.2307/2282967  
 Warde A, 2005, J CONSUM CULT, V5, P131, DOI DOI 10.1177/1469540505053090  
 Wilson C, 2011, ENVIRON PLANN A, V43, P2781, DOI 10.1068/a44404

NR 47

TC 4

Z9 4

U1 0

U2 2

PU PUBLIC LIBRARY SCIENCE

PI SAN FRANCISCO

PA 1160 BATTERY STREET, STE 100, SAN FRANCISCO, CA 94111 USA

SN 1932-6203

J9 PLOS ONE

JI PLoS One

PD JUL 28

PY 2016

VL 11

IS 7

AR e0158949

DI 10.1371/journal.pone.0158949

PG 15

WC Multidisciplinary Sciences

SC Science & Technology - Other Topics

GA DT5IL

UT WOS:000381516100016

PM 27467206

OA gold

DA 2018-05-03

ER

PT J

AU Abdessalem, T

Labidi, E

AF Abdessalem, Tahar

Labidi, Etidel

TI Economic analysis of the energy-efficient household appliances and the rebound effect

SO ENERGY EFFICIENCY

LA English

DT Article

DE Rebound effect; Energy efficiency; Appliances; Energy services; General equilibrium; Elasticity of substitution

ID GENERAL EQUILIBRIUM-ANALYSIS; CONSUMPTION; IMPACT; VIEW; SUSTAINABILITY; FALLACIES; DEBATE

AB Many strategies, such as improving energy efficiency, were identified as solutions to reduce energy consumption and carbon emissions. Nonetheless, the presence of a rebound effect could lead to a decrease in potential energy savings and carbon reductions resulting from technological advances in energy consumption. This study focuses on direct and indirect rebound effects on households' behavior. We examine the situation where consumers demand two types of energy services and explore how their choices are affected by changes in the efficiency of providing these services-and, importantly, the consequent implications for energy use. We employ a (narrowly construed) general equilibrium methodology in an attempt to provide a complete picture of the interactions in play in a theoretically confined setting. We limit the general equilibrium problem to two categories of energy appliances but include consideration of the production side of the equation and consequent budget implications, thus "closing" the system in a general equilibrium sense. We find that rebound magnitudes (both indirect and direct) are large.

C1 [Abdessalem, Tahar; Labidi, Etidel] Univ Carthage, Tunisia Polytech Sch, Lab Econ & Ind Management, BP 743, La Marsa 2070, Tunisia.

RP Labidi, E (reprint author), Univ Carthage, Tunisia Polytech Sch, Lab Econ & Ind Management, BP 743, La Marsa 2070, Tunisia.

EM Abdessalem.Tahar@ept.rnu.tn; labidi\_etidel@yahoo.fr

CR Allan G, 2007, *ENERG ECON*, V29, P779, DOI 10.1016/j.eneco.2006.12.006

Barker T, 2009, *ENERG EFFIC*, V2, P411, DOI 10.1007/s12053-009-9053-y

Bentzen J, 2004, *ENERG ECON*, V26, P123, DOI 10.1016/S0140-9883(03)00047-1

Berkhout PHG, 2000, *ENERG POLICY*, V28, P425, DOI 10.1016/S0301-4215(00)00022-7

Binswanger M, 2001, *ECOL ECON*, V36, P119, DOI 10.1016/S0921-8009(00)00214-7

Birof F, 2000, *ENERG POLICY*, V28, P457, DOI 10.1016/S0301-4215(00)00020-3

Brannlund R, 2007, *ENERG ECON*, V29, P1, DOI 10.1016/j.eneco.2005.09.003

BROOKES L, 1990, *ENERG POLICY*, V18, P199, DOI 10.1016/0301-4215(90)90145-T

Brookes L, 2000, *ENERG POLICY*, V28, P355, DOI 10.1016/S0301-4215(00)00030-6

Dimitropoulos J, 2007, *ENERG POLICY*, V35, P6354, DOI 10.1016/j.enpol.2007.07.028

Greene DL, 1999, *ENERGY J*, V20, P1

Greene D.L., 1992, *ENERGY J*, V13, P117

Greening LA, 2000, *ENERG POLICY*, V28, P389

Grepperud S, 2004, *ENERG ECON*, V26, P261, DOI 10.1016/j.eneco.2003.11.003

Hanley ND, 2006, *RENEW ENERG*, V31, P161, DOI 10.1016/j.renene.2005.08.023

Hanley N, 2009, *ECOL ECON*, V68, P692, DOI 10.1016/j.ecolecon.2008.06.004

Henly J, 1988, *ENERGY J*, V9, P163

Herring H, 1999, *APPL ENERG*, V63, P209, DOI 10.1016/S0306-2619(99)00030-6

Herring H, 2006, *ENERGY*, V31, P10, DOI 10.1016/j.energy.2004.04.055

Jaccard M, 2000, *ENERG POLICY*, V28, P451, DOI 10.1016/S0301-4215(00)00028-8

Jeroen C.J., 2011, *ENVIRON RESOUR ECON*, V48, P43

Jevons WS, 1865, *COAL QUESTION CAN BR*

Jonas N., 2009, *ENERGY EFFICIENCY*, V2, P221

Khazzoom J. D, 1980, *ENERGY J*, V1, P21

Lovins A., 1988, *ENERGY J*, V9, P155

Quirion Ph., 2005, *DISTRIBUTIONAL IMPAC*

Reinhard H., 2000, *ENERG POLICY*, V28, P403

Roy J, 2000, *ENERG POLICY*, V28, P433, DOI 10.1016/S0301-4215(00)00027-6

Sanne C, 2000, *ENERG POLICY*, V28, P487, DOI 10.1016/S0301-4215(00)00031-8

Saunders HD, 2008, *ENERG ECON*, V30, P2184, DOI 10.1016/j.eneco.2007.11.006

Saunders HD, 2014, *ECOL ECON*, V105, P220, DOI 10.1016/j.ecolecon.2014.06.011

Saunders HD, 2000, *ENERG POLICY*, V28, P497, DOI 10.1016/S0301-4215(00)00025-2

Saunders HD, 2000, *ENERG POLICY*, V28, P439, DOI 10.1016/S0301-4215(00)00024-0

Saunders H. D., 1992, *ENERGY J*, V13, P131, DOI DOI 10.5547/ISSN0195-6574-EJ-V0113-N04-7

Sorrell S, 2007, *ECOLOGICAL EC*, V65, P636, DOI DOI 10.1016/J.ECOLECON.2007.08.013

Sorrell S, 2009, *ENERG POLICY*, V37, P1456, DOI 10.1016/j.enpol.2008.12.003

Sorrell S, 2009, *ENERG POLICY*, V37, P1356, DOI 10.1016/j.enpol.2008.11.026

Turner K., 2008, *STRATHCLYDE DISCUSSI*

Turner K, 2009, *ENERG ECON*, V31, P648, DOI 10.1016/j.eneco.2009.01.008

Wei TY, 2007, *ENERG POLICY*, V35, P2023, DOI 10.1016/j.enpol.2006.08.009

Wei TY, 2010, *ENERG ECON*, V32, P661, DOI 10.1016/j.eneco.2009.09.002

Wigley K.J., 1997, 18 N AM C USAEE IAEE

NR 42

TC 4

Z9 4

U1 1

U2 10

PU SPRINGER

PI DORDRECHT

PA VAN GODEWIJCKSTRAAT 30, 3311 GZ DORDRECHT, NETHERLANDS

SN 1570-646X

EI 1570-6478

J9 ENER EFFIC

JI Energy Effic.

PD JUN

PY 2016

VL 9

IS 3

BP 605

EP 620

DI 10.1007/s12053-015-9387-6

PG 16

WC GREEN & SUSTAINABLE SCIENCE & TECHNOLOGY; Energy & Fuels; Environmental Studies

SC Science & Technology - Other Topics; Energy & Fuels; Environmental Sciences & Ecology

GA DL6DH

UT WOS:000375728000002

DA 2018-05-03

ER

PT J

AU Jensen, T

Holtz, G

Baedeker, C

Chappin, E.J.L

AF Jensen, Thorben

Holtz, Georg

Baedeker, Carolin

Chappin, Emile J. L.

TI Energy-efficiency impacts of an air-quality feedback device in residential buildings: An agent-based modeling assessment

SO ENERGY AND BUILDINGS

LA English

DT Article

DE Energy efficiency; Ventilation behavior; Behavior change; Diffusion; Agent-based modeling

ID SOCIAL-INFLUENCE; CONSUMPTION; BEHAVIOR; VENTILATION; INTERVENTIONS; INFORMATION; OCCUPANCY; SAVINGS

AB A key factor to energy-efficiency of heating in buildings is the behavior of households, in particular how they ventilate rooms. Energy demand can be reduced by behavioral change; devices can support this by giving feedback to consumers on their behavior. One such feedback device, called the 'CO2 meter', shows indoor air-quality in the colors of a traffic light to motivate so called 'shock ventilation', which is energy efficient ventilation behavior. The following effects of the 'CO2 meter' are analyzed: (1) the effect of the device on ventilation behavior within households, (2) the diffusion of 'CO2 meter' to other households, and (3) the diffusion of changed behavior to households that do not adopt a 'CO2 meter'. An agent-based model of these processes for the city of Bottrop (Germany) was developed using a variety of data sources. The model shows that the 'CO2 meter' would increase adoption of energy-efficient ventilation by c. 12% and reduce heating demand by c. 1% within 15 years. Technology diffusion was found to explain at least c. 54% of the estimated energy savings; behavior diffusion explains up to 46%. These findings indicate that the 'CO2 meter' is an interesting low-cost solution to increase the energy-efficiency in residential heating. (C) 2015 Elsevier B.V. All rights reserved.

C1 [Jensen, Thorben; Holtz, Georg; Baedeker, Carolin; Chappin, Emile J. L.] Wuppertal Inst Climate Environm & Energy, POB 100480, D-42004 Wuppertal, Germany.

[Jensen, Thorben; Chappin, Emile J. L.] Delft Univ Technol, POB 5015, NL-2600 GA Delft, Netherlands.

RP Jensen, T (reprint author), Wuppertal Inst Climate Environm & Energy, POB 100480, D-42004 Wuppertal, Germany.

EM Thorben.jensen@wupperinst.org; Georg.Holtz@wupperinst.org; Carolin.Baedeker@wupperinst.org; E.J.L.Chappin@tudelft.nl

FU German Federal Ministry of Education and Research [01UN1205A]; European Regional Development program INTERREG IVB

- FX The authors thank their colleagues from the research projects EnerTransRuhr (supported by the German Federal Ministry of Education and Research, grant number 01UN1205A) and SusLabNWE (supported by the European Regional Development program INTERREG IVB) for providing empirical data. Finally, the authors wish to thank Prof. Volker Grimm, Prof. Klaus Troitzsch, Dr. Peter Viebahn, Jonas Friege, and Jan Kaselofski for fruitful discussions on this paper.
- CR AJZEN I, 1991, ORGAN BEHAV HUM DEC, V50, P179, DOI 10.1016/0749-5978(91)90020-T  
 Azar E, 2015, ENER BUILDINGS, V97, P205, DOI 10.1016/j.enbuild.2015.03.059  
 Baedeker C., 2014, IST 2014  
 Burchell K., 2014, WORKING TOGETHER SAV  
 Chen JY, 2012, ENER BUILDINGS, V47, P515, DOI 10.1016/j.enbuild.2011.12.026  
 Choi HY, 2012, ECON REC, V88, P2, DOI 10.1111/j.1475-4932.2012.00809.x  
 Dahlstrom O., 2012, ENERGY BUILD, V54, P470  
 Ekpenyong UE, 2014, ENER BUILDINGS, V84, P344, DOI 10.1016/j.enbuild.2014.08.019  
 Ernst A., 2014, EMPIRICAL AGENT BASE, P85  
 Fatih B., 2008, WORLD ENERGY OUTLOOK  
 Frenken K., 2006, EC INNOVATION NEW TE, V15, P137, DOI [DOI 10.1080/10438590500141453, DOI 10.1080/10438590500141453]  
 Friege J, 2014, RENEW SUST ENER REV, V39, P196, DOI 10.1016/j.rser.2014.07.091  
 Galvin R, 2013, ENER BUILDINGS, V56, P32, DOI 10.1016/j.enbuild.2012.10.020  
 Geelen LMJ, 2008, INDOOR AIR, V18, P416, DOI 10.1111/j.1600-0668.2008.00542.x  
 Gill ZM, 2011, ENER BUILDINGS, V43, P117, DOI 10.1016/j.enbuild.2010.08.025  
 Griffiths M, 2008, ENER BUILDINGS, V40, P556, DOI 10.1016/j.enbuild.2007.04.013  
 Grimm V, 2005, SCIENCE, V310, P987, DOI 10.1126/science.1116681  
 Grimm V, 2013, INDIVIDUAL BASED MOD  
 Grimm V, 2010, ECOL MODEL, V221, P2760, DOI 10.1016/j.ecolmodel.2010.08.019  
 Grinewitschus V., 2013, P 7 INT C EN EFF DOM, P11  
 Hansmeier N., 2007, ENERGIEBEWUSSTE RUB  
 Holstein B., 2006, QUALITATIVE NETZWERK  
 Holzhauer S., 2015, THESIS U KASSEL  
 Landesbetrieb Information und Technik Nordrhein-Westfalen (IT.NRW), 2014, DAT PRIV NACH HAUSH  
 Jager W., 2003, HUMAN DECISION MAKIN  
 Jain RK, 2013, ENER BUILDINGS, V66, P119, DOI 10.1016/j.enbuild.2013.06.029  
 Jain R. K., 2013, THESIS COLUMBIA U  
 Jensen Thorben, 2014, 28th European Conference on Modelling and Simulation ECMS 2014. Proceedings, P782  
 Jensen T, 2015, TECHNOL FORECAST SOC, V98, P105, DOI 10.1016/j.techfore.2015.06.006  
 Kiesling E, 2012, CENT EUR J OPER RES, V20, P183, DOI 10.1007/s10100-011-0210-y  
 Lewin Kurt, 1947, READINGS SOCIAL PSYC, V3, P197  
 Liedtke C., 2013, 4 INT C SUST TRANS E, P702  
 Liedtke C, 2015, J CLEAN PROD, V97, P106, DOI 10.1016/j.jclepro.2014.04.070  
 Lovric T., 2015, RESULTS LIVING UNPUB  
 Nolan JM, 2008, PERS SOC PSYCHOL B, V34, P913, DOI 10.1177/0146167208316691  
 North M.J., 2013, COMPLEX ADAPT SYST M, V1, P1, DOI DOI 10.1186/2194-3206-1-3  
 Perez-Lombard L, 2008, ENER BUILDINGS, V40, P394, DOI 10.1016/j.enbuild.2007.03.007  
 Peschiera G, 2010, ENER BUILDINGS, V42, P1329, DOI 10.1016/j.enbuild.2010.03.001  
 Prell C, 2011, SOCIAL NETWORK ANAL  
 Rogers E., 2003, DIFFUSION INNOVATION  
 M Rogers E., 2010, DIFFUSION INNOVATION  
 Santamouris M, 2008, ENER BUILDINGS, V40, P1833, DOI 10.1016/j.enbuild.2008.04.002  
 Santin OG, 2009, ENER BUILDINGS, V41, P1223, DOI 10.1016/j.enbuild.2009.07.002  
 Schwarz N, 2009, TECHNOL FORECAST SOC, V76, P497, DOI 10.1016/j.techfore.2008.03.024  
 Sopha BM, 2013, ENVIRON INNOV SOC TR, V8, P42, DOI 10.1016/j.eist.2013.06.001  
 Stromback J., 2011, POTENTIAL SMART METE  
 Tukker A, 2010, J IND ECOL, V14, P13, DOI 10.1111/j.1530-9290.2009.00208.x  
 Nikolic I., 2012, AGENT BASED MODELLIN  
 Watts DJ, 1998, NATURE, V393, P440, DOI 10.1038/30918

Wiegand T, 2003, OIKOS, V100, P209, DOI 10.1034/j.1600-0706.2003.12027.x  
 [Anonymous], 2015, SIN MIL

NR 51

TC 4

Z9 4

U1 3

U2 19

PU ELSEVIER SCIENCE SA

PI LAUSANNE

PA PO BOX 564, 1001 LAUSANNE, SWITZERLAND

SN 0378-7788

EI 1872-6178

J9 ENERGBUILDINGS

J1 Energy Build.

PD MAR 15

PY 2016

VL 116

BP 151

EP 163

DI 10.1016/j.enbuild.2015.11.067

PG 13

WC Construction & Building Technology; Energy & Fuels; Engineering, Civil

SC Construction & Building Technology; Energy & Fuels; Engineering

GA DJ0AH

UT WOS:000373863300015

DA 2018-05-03

ER

PT J

AU Terry, N

Palmer, J

AF Terry, Nicola

Palmer, Jason

TI Trends in home computing and energy demand

SO BUILDING RESEARCH AND INFORMATION

LA English

DT Article

DE energy consumption; energy demand; energy monitoring; energy use  
 behaviour; household appliances; plug loads; information and  
 communications technologies (ICTs); trends

ID INSIGHTS

AB Household energy demand due to domestic computer usage has changed beyond recognition over the past thirty years. Computers are now used in most homes, almost every day and laptop ownership has overtaken traditional desktop computers. Mobile devices give access to services that in the past required desktops, and they are usually more energy efficient. Today's computers usually rely on wireless routers that are often run all day. The effect of these changes on electricity use in the home has been profound. At least 60% more electricity was used for UK home computing in 2012 than in 1990. The implications of recent changes in information technology use are assessed for domestic electricity use and carbon emissions, using data from the Household Electricity Survey (HES) - the most detailed survey of electricity consumption in UK homes. On average, routers use twice as much energy per day as the laptops they serve. Laptops also draw power at a different time of day compared with desktop computers - which has implications for generation. Policy and practical recommendations are made for reducing energy use for information technology, including the estimated energy savings that could be achieved if UK routers met the US Energy Star standard for energy efficiency.

C1 [Terry, Nicola; Palmer, Jason] Cambridge Architectural Res, 25 Gwydir St 6, Cambridge CB1 2LG, England.

RP Terry, N; Palmer, J (reprint author), Cambridge Architectural Res, 25 Gwydir St 6, Cambridge CB1 2LG, England.

EM nicola.terry@carltd.com; jason@carltd.com  
CR Almeida Ad, 2011, ENERGY BUILD, V43, P1884, DOI DOI 10.1016/J.ENBUILD.2011.03.027  
Bates O., 2014, P C HUM FACT COMP TO  
Coleman M, 2012, ENERGBUILDINGS, V54, P61, DOI 10.1016/j.enbuild.2012.06.008  
Costenaro D., 2012, P 2012 ACEEE SUMM ST, P1365  
D-Link, 2009, GREEN ROUT SWITCH NA  
DECC, 2012, DIG UK EN STAT DUKES  
[Anonymous], 2014, EN CONS UK ECUK DOM  
Energy Efficient Strategies, 2010, STANDB POW LOW EN NE  
Energy Star, 2013, EN STAR PROGR REQ SM  
EST DECC and DEFRA, 2012, POW NAT HOUS EL US H  
European Commission, 2009, EU COMM ANN C 8  
Ofcom, 2014, FACTS FIG  
Ofcom, 2014, AD MED US ATT REP 20  
Office of National Statistics (ONS), 2011, FIN UK GREENH GAS EM  
ONS, 2012, INT ACC HOUS IND 201  
Owon, 2012, MUCH DOES IT COST CH  
Palmer J., 2014, POWERING THE NATION  
Palmer J, 2013, FURTHER ANAL HOUSEHO  
Palmer J., 2014, ENERGY USE HOME MODE  
Palmer J., 2013, UK HOUSING ENERGY FA  
Ropke I, 2012, TELEMAT INFORMAT, V29, P348, DOI 10.1016/j.tele.2012.02.001  
Shehabi A, 2014, ENVIRON RES LETT, V9, DOI 10.1088/1748-9326/9/5/054007  
Strategy Analytics, 2012, Q HOUS WORLDW NOW HA  
Terry N., 2014, MOBILE NETWORK ENERGB  
Zimmermann J.-P., 2012, HOUSEHOLD ELECT SURV

NR 25  
TC 4  
Z9 4  
U1 4  
U2 25  
PU TAYLOR & FRANCIS LTD  
PI ABINGDON  
PA 4 PARK SQUARE, MILTON PARK, ABINGDON OX14 4RN, OXON, ENGLAND  
SN 0961-3218  
EI 1466-4321  
J9 BUILD RES INF  
JI Build. Res. Informat.  
PD FEB 17  
PY 2016  
VL 44  
IS 2  
BP 175  
EP 187  
DI 10.1080/09613218.2015.1040284  
PG 13  
WC Construction & Building Technology  
SC Construction & Building Technology  
GA DB7KU  
UT WOS:000368694800005  
DA 2018-05-03  
ER

PT J  
AU Vogel, J  
Lundqvist, P  
Blomkvist, P  
Arias, J

AF Vogel, Jonas Anund

Lundqvist, Per

Blomkvist, Par

Arias, Jaime

TI Problem areas related to energy efficiency implementation in Swedish multifamily buildings

SO ENERGY EFFICIENCY

LA English

DT Article

DE Energy efficiency; Barriers; Buildings; Sweden; Interview study

ID TRANSACTION COSTS; BARRIERS; CONSERVATION; TECHNOLOGY; FRAMEWORK; POLICIES; GAP

AB This paper investigates problem areas related to energy efficiency implementation in Swedish multifamily buildings. The paper first presents a generic list of (theoretical) problem areas identified through a literature survey. Using a qualitative approach, the paper also investigates if the problem areas identified in the literature also have an impact on the Swedish building sector. Results from the interview study reveal a strong coherence between problem areas in the literature and those expressed by the interviewees. However, this paper identifies seven novel challenges that cannot be derived from the list of barriers in the literature. Moreover, results reveal that as many as 12 problem areas have their origin in national factors such as agreement structures, incentive schemes, and cost calculation methods.

C1 [Vogel, Jonas Anund; Lundqvist, Per; Arias, Jaime] Royal Inst Technol, Dept Energy Technol, Brinellvagen 68, S-10044 Stockholm, Sweden.

[Blomkvist, Par] Royal Inst Technol, Dept Ind Econ & Management, Lindstedsvagen 30, S-10044 Stockholm, Sweden.

RP Vogel, J (reprint author), Royal Inst Technol, Dept Energy Technol, Brinellvagen 68, S-10044 Stockholm, Sweden.

EM jonas.anund@energy.kth.se

FU Stiftelsen for teknisk och vetenskaplig forskning till minne av J. Gust.

Richert-Vattenbyggnadsbyrans grundare

FX Financial support from the "Stiftelsen for teknisk och vetenskaplig forskning till minne av J. Gust. Richert-Vattenbyggnadsbyrans grundare" is gratefully acknowledged. In addition, we would like to thank the interviewees for their participation.

CR Backlund S, 2012, ENER POLICY, V51, P392, DOI 10.1016/j.enpol.2012.08.042

Blomkvist P, 2013, INT J COMMONS, V7, P113, DOI 10.18352/ijc.353

Boverket, 2003, BATTR KOLL UND

Chai KH, 2012, ENER POLICY, V46, P460, DOI 10.1016/j.enpol.2012.04.012

Charmaz K, 2006, CONSTRUCTING GROUNDE

Checkland P., 1981, SYSTEMS THINKING SYS

Ellen Macarthur Foundation, 2010, CIRC EC EC BUS RAT A

Energimyndigheten, 2013, SUMM EN STAT DWELL N

Fejes A., 2009, HDB KVALITATIV ANAL

Gillingham K, 2006, ANNU REV ENV RESOUR, V31, P161, DOI 10.1146/annurev.energy.31.020105.100157

Gluch P., 2012, J CLEAN PROD, V11, P1

Heckathorn DD, 2002, SOC PROBL, V49, P11, DOI 10.1525/sp.2002.49.1.11

Hughes T.P., 1999, SOCIAL CONSTRUCTION, P51

Hughes T. P., 1992, TECHNOLOGY ENTERPRIS, P97

International Energy Agency, 2007, MIND GAP QUANT PRINC

JAFFE AB, 1994, ENER POLICY, V22, P804, DOI 10.1016/0301-4215(94)90138-4

JAFFE AB, 1994, RESOUR ENERGY ECON, V16, P91, DOI 10.1016/0928-7655(94)90001-9

Johansson Y., 2007, SABO FORETAGENS FORU

Kvale S., 1996, INTERVIEWS INTRO QUA

Lagrergrén F., 2004, RETHINKING ENERGY SY

Lovins AB, 1996, ENER POLICY, V24, P331, DOI 10.1016/0301-4215(95)00138-7

Lovins A. B., 2007, ENERGY AM SOC 13 MYT, P239

Mason M., 2010, FORUM QUALITATIVE SO

Mills B, 2012, ENER POLICY, V49, P616, DOI 10.1016/j.enpol.2012.07.008

Mundaca L, 2007, ENER POLICY, V35, P4340, DOI 10.1016/j.enpol.2007.02.029



Mundaca TL, 2013, CLIM POLICY, V13, P490, DOI 10.1080/14693062.2013.781452  
 Pellegrini-Masini G, 2011, ENER POLICY, V39, P5409, DOI 10.1016/j.enpol.2011.05.023  
 Peterman A, 2012, ENER POLICY, V43, P415, DOI 10.1016/j.enpol.2012.01.026  
 Project Management Institute Inc, 2013, GUID PROJ MAN BOD KN  
 Pryke S.D., 2004, CONSTR MANAG EC, V22, P787, DOI DOI 10.1080/0144619042000206533  
 Persson J., 2005, HINDER DRIVKRAFTER E  
 Royal Swedish Academy of Engineering Sciences, 2012, EN SVER FLERB HIND M  
 Ryghaug M, 2009, ENER POLICY, V37, P984, DOI 10.1016/j.enpol.2008.11.001  
 Schleich J, 2008, ENER ECON, V30, P449, DOI 10.1016/j.eneco.2006.08.004  
 Schot J, 2008, TECHNOL ANAL STRATEG, V20, P537, DOI 10.1080/09537320802292651  
 Shove E., 1998, GAPS BARRIERS CONCEP  
 Solomon BD, 2011, ENER POLICY, V39, P7422, DOI 10.1016/j.enpol.2011.09.009  
 Sorrell S., 2000, REDUCING BARRIERS EN  
 Sovacool BK, 2009, ENER POLICY, V37, P1529, DOI 10.1016/j.enpol.2008.12.016  
 Sperling K, 2011, ENER POLICY, V39, P1338, DOI 10.1016/j.enpol.2010.12.006  
 Statistics Sweden, 2013, POP COUNTR COUNT MUN  
 Statistics Sweden, 2012, YB HOUS BUILD STAT 2, V2012  
 Statistics Sweden, 2013, NEW CONSTR COMPL RES  
 Statistics Sweden, 2014, NUMB DWELL TYP BUILD  
 Sveriges Byggindustrier, 2008, REN VINST BAK FIN BA  
 Swedish Government Offices, 2012, SAMM KLIM EN  
 Thollander P., 2008, INCREASED ENERGY EFF  
 Thollander P, 2012, ENER POLICY, V42, P461, DOI 10.1016/j.enpol.2011.12.012  
 Trianni A, 2012, ENERGY, V37, P494, DOI 10.1016/j.energy.2011.11.005  
 Warfvinge C., 2008, MYCKET ENERGI ATT SP, P7  
 Weber L, 1997, ENER POLICY, V25, P833, DOI 10.1016/S0301-4215(97)00084-0

NR 51

TC 4

Z9 4

U1 0

U2 7

PU SPRINGER

PI DORDRECHT

PA VAN GODEWIJCKSTRAAT 30, 3311 GZ DORDRECHT, NETHERLANDS

SN 1570-646X

EI 1570-6478

J9 ENER EFFIC

JI Energy Effic.

PD JAN

PY 2016

VL 9

IS 1

BP 109

EP 127

DI 10.1007/s12053-015-9352-4

PG 19

WC GREEN & SUSTAINABLE SCIENCE & TECHNOLOGY; Energy & Fuels; Environmental Studies

SC Science & Technology - Other Topics; Energy & Fuels; Environmental Sciences & Ecology

GA DC1RC

UT WOS:000368993200006

DA 2018-05-03

ER

PT J

AU Viani, F

AF Viani, Federico

TI A DECISION SUPPORT SYSTEM BASED ON WIRELESS POWER METERING FOR ENERGY  
SAVING IN SMART BUILDINGS

SO MICROWAVE AND OPTICAL TECHNOLOGY LETTERS

LA English

DT Article

DE smart metering; wireless sensor networks; game theory; energy saving

AB Energy saving in smart buildings is addressed through an innovative approach based on game theory (GT). Starting from the measurement of the users' consumptions performed with wireless smart meters interconnected to the appliances, the collected data are processed by a control unit to evaluate the optimal load profiles and to suggest to the users the most convenient schedule of appliances. This is yielded by mathematically solving a multiplayer game throughout GT principles. The objective is that of reaching the Nash equilibrium in which all the players are not interested in changing their situation/status (i.e., the appliance scheduling) as every deviation would be suboptimal. Results from numerical simulations are reported to assess the performance of the proposed GT-based method, while preliminary experimental tests are performed to show the potentialities of the system in real conditions. (C) 2015 Wiley Periodicals, Inc.

C1 [Viani, Federico] Univ Trent, Dept Informat Engn &amp; Comp Sci, ELEDIA Res Ctr, I-38123 Trento, Italy.

RP Viani, F (reprint author), Univ Trent, Dept Informat Engn &amp; Comp Sci, ELEDIA Res Ctr, Via Sommar 9, I-38123 Trento, Italy.

EM federico.viani@disi.unitn.it

RI Viani, Federico/F-1037-2011

OI Viani, Federico/0000-0003-0317-4324

CR AKYILDIZ F, 2002, IEEE COMMUNICATIONS, V40, P102

Fudenberg D., 1991, GAME THEORY

Koutitas G, 2014, IEEE COMMUN MAG, V52, P120, DOI 10.1109/MCOM.2014.6807956

Mohsenian-Rad AH, 2010, IEEE T SMART GRID, V1, P320, DOI 10.1109/TSG.2010.2089069

Polo A, 2014, PROC EUR CONF ANTENN, P1195, DOI 10.1109/EuCAP.2014.6901987

Powell M. J. D., 1994, ADV OPTIMIZATION NUM, P51

Viani F., 2014, 2014 IEEE ANT C ANT, P16

Viani F., 2012, 2012 EUR C ANT PROP, P49

Viani F, 2013, P IEEE, V101, P2381, DOI 10.1109/JPROC.2013.2266858

Wood AJ, 1996, POWER GENERATION OPE

NR 10

TC 4

Z9 4

U1 0

U2 4

PU WILEY-BLACKWELL

PI HOBOKEN

PA 111 RIVER ST, HOBOKEN 07030-5774, NJ USA

SN 0895-2477

EI 1098-2760

J9 MICROW OPT TECHN LET

JI Microw. Opt. Technol. Lett.

PD DEC

PY 2015

VL 57

IS 12

BP 2750

EP 2752

DI 10.1002/mop.29432

PG 4

WC Engineering, Electrical &amp; Electronic; Optics

SC Engineering; Optics

GA CXOLT

UT WOS:000365388800009

DA 2018-05-03

ER

PT J

AU Arens, E

Zhang, H

Hoyt, T

Kaam, S

Bauman, F

Zhai, YC

Paliaga, G

Stein, J

Seidl, R

Tully, B

Rimmer, J

Toftum, J

AF Arens, Edward

Zhang, Hui

Hoyt, Tyler

Kaam, Soazig

Bauman, Fred

Zhai, Yongchao

Paliaga, Gwelen

Stein, Jeff

Seidl, Reinhard

Tully, Brad

Rimmer, Julian

Toftum, Jorn

TI Effects of diffuser airflow minima on occupant comfort, air mixing, and building energy use (RP-1515)

SO SCIENCE AND TECHNOLOGY FOR THE BUILT ENVIRONMENT

LA English

DT Article

ID TEMPERATURE; QUALITY

AB There is great energy-saving potential in reducing variable air volume box minimum airflow set-points to about 10% of maximum. Typical savings are on the order of 10%-30% of total HVAC energy, remarkable for an inexpensive controls set-point change that properly maintains outside air ventilation. However, there has long been concern whether comfort and room air mixing are maintained under low flows through diffusers, and this concern has prompted variable air volume minima to be typically set at 20%-50% of maximum. RP 1515 evaluated occupants' thermal comfort and air quality satisfaction in operating buildings under both conventional and reduced minimum variable air volume flow set-points, and measured the air diffusion performance index and air change effectiveness for typical diffuser types in the laboratory. The hypotheses were that lowered flow operation would not significantly reduce comfort or air quality and that HVAC energy savings would be substantial. The hypotheses were almost entirely confirmed for both warm and cool seasons. But beyond this, the reduction of excess airflow during low-load periods caused occupants' cold discomfort in the warm season to be halved, a surprising improvement. It appears that today's widespread overcooling of buildings can be corrected without risk of discomfort by lowering conventional variable air volume minimum flow set-points.

C1 [Arens, Edward; Zhang, Hui; Hoyt, Tyler; Kaam, Soazig; Bauman, Fred; Zhai, Yongchao] Univ Calif Berkeley, Ctr Built Environm, Berkeley, CA 94720 USA.

[Paliaga, Gwelen; Stein, Jeff; Seidl, Reinhard] Taylor Engr, Alameda, CA USA.

[Tully, Brad] Price Ind, Winnipeg, MB, Canada.

[Rimmer, Julian] Price Ind, Atlanta, GA USA.

[Toftum, Jorn] Tech Univ Denmark, Dept Civil Engr, DK-2800 Lyngby, Denmark.

RP Arens, E (reprint author), Univ Calif Berkeley, Ctr Built Environm, 382B Wurster Hall, Berkeley, CA 94720 USA.

EM earens@berkeley.edu

RI Toftum, Jorn/B-4670-2017

OI Toftum, Jorn/0000-0001-7697-7617

FU ASHRAE [030341-003]; California Energy Commission (CEC) [500-99-013,

BOA-POB-244-B65]; CBE at University of California, Berkeley

FX This study was jointly funded by ASHRAE (award number 030341-003), the California Energy Commission (CEC contract number 500-99-013, work authorization number BOA-POB-244-B65), and the CBE at University of California, Berkeley.

CR Arens E., 2011, 1291997RA2002 ANSIAS  
 Arens E., 2012, RP1515 ASHRAE  
 ASHRAE, 2009, 1132009 ASHRAE ANSI  
 ASHRAE (American Society of Heating Refrigerating and Airconditioning Engineer), 2013, 552013 ASHRAE  
 ASHRAE, 2006, 702006 ASHRAE ANSI  
 Bauman F., 1995, INTERNAL REPORT  
 Stein J., 2007, 0514 PAC GAS EL CO E  
 Energy Design Resources (EDR), 2010, DES GUID ADV VAR AIR  
 Fang L, 1998, INDOOR AIR, V8, P276, DOI 10.1111/j.1600-0668.1998.00008.x  
 Fisk WJ, 1997, INDOOR AIR, V7, P55, DOI 10.1111/j.1600-0668.1997.t01-3-00007.x  
 Hoyt T, 2015, BUILD ENVIRON, V88, P89, DOI 10.1016/j.buildenv.2014.09.010  
 Humphreys M. A., 2002, IND AIR 2002 P 9 INT, P86  
 Int-Hout D, 2004, ASHRAE J, V46, pS24  
 Int-Hout D, 2012, ASHRAE J, V54, P38  
 Int-Hout D, 2012, ASHRAE J, V54, P18  
 John DA, 2012, ASHRAE J, V54, P20  
 Kaczmarczyk J, 2010, BUILD ENVIRON, V45, P848, DOI 10.1016/j.buildenv.2009.09.005  
 Liu R., 2012, 1353TRP ASHRAE  
 Melikov AK, 2012, BUILD ENVIRON, V47, P400, DOI 10.1016/j.buildenv.2011.06.017  
 Mendell MJ, 2009, INDOOR AIR, V19, P291, DOI 10.1111/j.1600-0668.2009.00592.x  
 Int-Hout D., 1988, ASHRAE T, V94, P694  
 Dols W. S., 1991, INDOOR AIR, V1, P229  
 Persily A. K., 1992, INT S ROOM AIR CONV  
 Taylor S., 2009, DESIGN GUIDELINES AD  
 Stein J., 2004, ASHRAE J, V46, P40  
 Taylor ST, 2012, ASHRAE J, V54, P16  
 Zhang H, 2011, BUILD RES INF, V39, P134, DOI 10.1080/09613218.2011.552703  
 Zhang H, 2010, BUILD ENVIRON, V45, P29, DOI 10.1016/j.buildenv.2009.02.016

NR 28  
 TC 4  
 Z9 4  
 U1 0  
 U2 6

PU TAYLOR & FRANCIS INC  
 PI PHILADELPHIA  
 PA 530 WALNUT STREET, STE 850, PHILADELPHIA, PA 19106 USA  
 SN 2374-4731  
 EI 2374-474X  
 J9 SCI TECHNOL BUILT EN  
 JI Sci. Technol. Built Environ.  
 PD NOV 17  
 PY 2015  
 VL 21  
 IS 8  
 BP 1075  
 EP 1090  
 DI 10.1080/23744731.2015.1060104  
 PG 16  
 WC Thermodynamics; Construction & Building Technology; Engineering, Mechanical  
 SC Thermodynamics; Construction & Building Technology; Engineering  
 GA CV8SG

UT WOS:000364557400002

DA 2018-05-03

ER

PT J

AU Estiri, H

AF Estiri, Hossein

TI The indirect role of households in shaping US residential energy demand patterns

SO ENERGY POLICY

LA English

DT Article

DE Energy demand; Energy policy; Indirect effects; Residential sector; Covariance structure analysis

ID ELECTRICITY CONSUMPTION; URBAN FORM; MODEL; SECTOR; CONSERVATION; CITY; DETERMINANTS; DENSITY; IMPACT; SCALE

AB About a quarter of US energy demand is for domestic use. Yet an understanding of the processes, determinants, and consequences of household energy demand remains elusive. Conventional energy policy has overwhelmingly focused on improving energy efficiency of the buildings. This research applies a non-linear methodology and an interdisciplinary approach to household energy demand. Using data from the US residential sector (2009 Residential Energy Consumption Survey), this research performs Covariance Structure Analysis to isolate direct and indirect effects of household and housing characteristics on total annual domestic energy use. Outcomes uncover some of households' indirect effects on energy demand, which in this research mainly happen through household effects on building characteristics, highlighting the indirect role of household choices in shaping residential energy demand patterns. To maximize its efficiency in reducing energy demand and GHG emissions, this paper suggests that in addition to investing in energy efficient technologies, energy policy should incorporate indirect effects of household choices on the configuration of their future homes. (C) 2015 Elsevier Ltd. All rights reserved.

C1 Univ Washington, Inst Translat Hlth Sci, Seattle, WA 98109 USA.

RP Estiri, H (reprint author), Univ Washington, Inst Translat Hlth Sci, 850 Republican St Box 358051, Seattle, WA 98109 USA.

EM hestiri@uw.edu

OI Estiri, Hossein/0000-0002-0204-8978

CR Aune M, 2007, ENER POLICY, V35, P5457, DOI 10.1016/j.enpol.2007.05.007

BAXTER LW, 1986, ENER ECON, V8, P62, DOI 10.1016/0140-9883(86)90031-9

Brandon G, 1999, J ENVIRON PSYCHOL, V19, P75, DOI 10.1006/jev.1998.0105

Brounen D, 2012, EUR ECON REV, V56, P931, DOI 10.1016/j.eurocorev.2012.02.007

BROWNE MW, 1984, BRIT J MATH STAT PSY, V37, P62, DOI 10.1111/j.2044-8317.1984.tb00789.x

CHEVAN A, 1971, DEMOGRAPHY, V8, P451, DOI 10.2307/2060682

Clark Kim E., 2007, J AM PLAN ASS, V61, P37

Clark W., 1996, HOUSEHOLDS HOUSING C

Clark WAV, 2003, ENVIRON PLANN A, V35, P323, DOI 10.1068/a3542

Costa DL, 2011, AM ECON REV, V101, P88, DOI 10.1257/aer.101.3.88

CRAMER JC, 1984, ENERGY, V9, P207, DOI 10.1016/0360-5442(84)90108-7

Druckman A, 2008, ENER POLICY, V36, P3177, DOI 10.1016/j.enpol.2008.03.021

Dubin McFadden, 1984, ECONOMETRICA, V52, P345

Ewing R, 2008, HOUS POLICY DEBATE, V19, P1, DOI 10.1080/10511482.2008.9521624

HIRST E, 1982, ENER ECON, V4, P74, DOI 10.1016/0140-9883(82)90024-X

HIRST E, 1980, MANAGE SCI, V26, P857, DOI 10.1287/mnsc.26.9.857

Holden E, 2005, URBAN STUD, V42, P2145, DOI 10.1080/00420980500332064

IRONMONGER DS, 1995, ENER ECON, V17, P301, DOI 10.1016/0140-9883(95)00032-P

Joreskog Karl G., 2006, PRELIS

Joreskog K. G., 2006, LISREL 8 8

Kavgic M, 2010, BUILD ENVIRON, V45, P1683, DOI 10.1016/j.buildenv.2010.01.021

Kaza N, 2010, ENER POLICY, V38, P6574, DOI 10.1016/j.enpol.2010.06.028

Kelly S, 2011, ENERGY, V36, P5610, DOI 10.1016/j.energy.2011.07.009

Kristrom Bengt, 2008, OECD J GEN PAPERS, V2008, P95, DOI DOI 10.1787/1995283X

Larson W, 2012, J URBAN ECON, V72, P147, DOI 10.1016/j.jue.2012.05.001  
LONG JE, 1993, ENERG ECON, V15, P232, DOI 10.1016/0140-9883(93)90012-G  
Lucon O, 2014, CLIMATE CHANGE 2014: MITIGATION OF CLIMATE CHANGE, P671  
LUTZENHISER L, 1992, ENERGY, V17, P47, DOI 10.1016/0360-5442(92)90032-U  
LUTZENHISER L, 1993, ANNU REV ENERG ENV, V18, P247, DOI 10.1146/annurev.energy.18.1.247  
Lutzenhiser L., 1997, ENV SIGNIFICANT CONS, P77  
Lutzenhiser L., 2010, P ACEEE SUMM STUD EN, P167  
Matsueda Ross L, 2012, STRUCTURAL EQU UNPUB, VSOC 529/CS55 526  
Moezzi Mithra, 2010, P ACEEE SUMM STUD EN, P2017  
MUTHEN B, 1983, J ECONOMETRICS, V22, P43, DOI 10.1016/0304-4076(83)90093-3  
Norman J, 2006, J URBAN PLAN D-ASCE, V132, P10, DOI 10.1061/(ASCE)0733-9488(2006)132:1(10)  
O'Neill BC, 2002, POPUL DEV REV, V28, P53  
[Anonymous], 2008, ENERG BUILDINGS, V40, P394  
POYER DA, 1993, ENERG ECON, V15, P93, DOI 10.1016/0140-9883(93)90027-O  
Poyer DA, 1997, ENERG ECON, V19, P445, DOI 10.1016/S0140-9883(97)01024-4  
Roaf S, 2005, ADAPTING BUILDINGS C  
Santamouris M, 2007, ENERG BUILDINGS, V39, P893, DOI 10.1016/j.enbuild.2006.11.001  
Santin OG, 2009, ENERG BUILDINGS, V41, P1223, DOI 10.1016/j.enbuild.2009.07.002  
Shimoda Y, 2007, ENERGY, V32, P1617, DOI 10.1016/j.energy.2007.01.007  
Stemers K, 2009, BUILD RES INF, V37, P625, DOI 10.1080/09613210903186661  
Swan LG, 2009, RENEW SUST ENERG REV, V13, P1819, DOI 10.1016/j.rser.2008.09.033  
[Anonymous], 2013, INT EN OUTL 2013  
U. S. Energy Information Administration, 2013, 2009 RECS SURV DAT  
U.S. Energy Information Administration, 2015, MONTHL EN REV MARCH  
VANRAAIJ WF, 1983, J ECON PSYCHOL, V3, P39, DOI 10.1016/0167-4870(83)90057-0  
Vassileva I, 2012, APPL ENERG, V90, P182, DOI 10.1016/j.apenergy.2011.05.031  
Wilhite H, 1996, ENERG POLICY, V24, P795, DOI 10.1016/0301-4215(96)00061-4  
Wilson C, 2007, ANNU REV ENV RESOUR, V32, P169, DOI 10.1146/annurev.energy.32.053006.141137  
Yu Z, 2011, ENERG BUILDINGS, V43, P1409, DOI 10.1016/j.enbuild.2011.02.002

NR 53

TC 4

Z9 4

U1 0

U2 5

PU ELSEVIER SCI LTD

PI OXFORD

PA THE BOULEVARD, LANGFORD LANE, KIDLINGTON, OXFORD OX5 1GB, OXON, ENGLAND

SN 0301-4215

EI 1873-6777

J9 ENERG POLICY

J1 Energy Policy

PD NOV

PY 2015

VL 86

BP 585

EP 594

DI 10.1016/j.enpol.2015.08.008

PG 10

WC Economics; Energy & Fuels; Environmental Sciences; Environmental Studies

SC Business & Economics; Energy & Fuels; Environmental Sciences & Ecology

GA CV4OJ

UT WOS:000364246100053

DA 2018-05-03

ER

PT J

AU Noonan, DS

Hsieh, LHC

Matisoff, D

AF Noonan, Douglas S.

Hsieh, Lin -Han Chiang

Matisoff, Daniel

TI Economic, sociological, and neighbor dimensions of energy efficiency adoption behaviors: Evidence from the U.S residential heating and air conditioning market

SO ENERGY RESEARCH & SOCIAL SCIENCE

LA English

DT Article

DE Energy efficiency; Green buildings; Technology adoption; Housing

ID TECHNOLOGY ADOPTION; HOUSING-MARKET; CONSUMPTION; ELECTRICITY; POLICY; CONSERVATION; BUILDINGS; DIFFUSION; KNOWLEDGE; GEOGRAPHY

AB This study identifies factors that affect the adoption behavior for residential Heating, Ventilating, and Air Conditioning (HVAC) systems, including a spatial and temporal contagion effect, house characteristics, and other economic and contextual factors. The study draws on a dataset of house sale records in the greater Chicago area, spanning 1992- 2004. First-differenced models and restricting the sample to new construction allow separate identification of adoption determinants for homeowners and for developers, respectively. We show that attributes of the building stock and demographics influence adoption decisions of both homeowners and developers. This includes a strong influence of square footage, a modest spatial clustering effect for existing homes, a consistent deterrent effect of higher property tax rates, and a positive influence of neighborhood education levels. Adoption decisions for existing homeowners appear to be driven by different factors than sellers of newly constructed homes. Adoption coincided with multistory homes for developers, and neighbor adoption rates predicted adoption by existing homeowners but not developers. The results highlight the need for more research into the social context of energy efficiency investment. (C) 2015 Elsevier Ltd. All rights reserved.

C1 [Noonan, Douglas S.] Indiana Univ Purdue Univ, Indianapolis, IN 46202 USA.

[Hsieh, Lin -Han Chiang] Chung Yuan Christian Univ, Taoyuan, Taiwan.

[Matisoff, Daniel] Georgia Inst Technol, Atlanta, GA 30332 USA.

RP Noonan, DS (reprint author), Indiana Univ Purdue Univ, Indianapolis, IN 46202 USA.

EM NoonanD@iupui.edu

CR Allcott H, 2012, J ECON PERSPECT, V26, P3, DOI 10.1257/jep.26.1.3

Allcott H, 2010, SCIENCE, V327, P1204, DOI 10.1126/science.1180775

Anselin L, 2002, AGR ECON, V27, P247, DOI 10.1016/S0169-5150(02)00077-4

Ardehali MM, 1996, ENER CONVERS MANAGE, V37, P1469, DOI 10.1016/0196-8904(95)00219-7

Axsen J., 2011, ENV PLAN A, V44, P1047

Axsen J, 2009, RESOUR ENERGY ECON, V31, P221, DOI 10.1016/j.reseneeco.2009.02.001

Baerenklau KA, 2005, LAND ECON, V81, P1

Bollinger B., 2011, PEER EFFECTS DIFFUSI

Brounen D, 2012, EUR ECON REV, V56, P931, DOI 10.1016/j.eurocorev.2012.02.007

Brounen D, 2011, J ENVIRON ECON MANAG, V62, P166, DOI 10.1016/j.jeem.2010.11.006

Burgett JM, 2013, ENER EFFIC, V6, P523, DOI 10.1007/s12053-012-9190-6

Busse R., 2012, NBER WORKING PAPER, P18212

Chong H, 2012, EUR ECON REV, V56, P906, DOI 10.1016/j.eurocorev.2012.02.009

Cidell J, 2009, PROF GEOGR, V61, P200, DOI 10.1080/00330120902735932

Costa D. L., 2010, NATL BUREAU EC RES W, V15939

Costa DL, 2011, AM ECON REV, V101, P88, DOI 10.1257/aer.101.3.88

D'Oca S, 2014, ENERGY RES SOC SCI, V3, P131, DOI 10.1016/j.erss.2014.07.015

Dastrup SR, 2012, EUR ECON REV, V56, P961, DOI 10.1016/j.eurocorev.2012.02.006

Davis L., 2010, NATL BUREAU EC RES W, V12130

Deng YH, 2014, REG SCI URBAN ECON, V47, P35, DOI 10.1016/j.regsciurbeco.2013.09.015

DINAN TM, 1989, J URBAN ECON, V25, P52, DOI 10.1016/0094-1190(89)90043-0

Eder JM, 2015, ENERGY RES SOC SCI, V5, P45, DOI 10.1016/j.erss.2014.12.014

Eichholtz P., 2010, WORKING PAPER

Ellsworth-Krebs K, 2015, ENERGY RES SOC SCI, V6, P100, DOI 10.1016/j.erss.2014.12.003

Estiri H, 2015, ENERGY RES SOC SCI, V6, P109, DOI 10.1016/j.erss.2015.01.002

Fuerst F, 2011, REAL ESTATE ECON, V39, P45, DOI 10.1111/j.1540-6229.2010.00286.x

Galster G. C., 2008, SCHMOLLERS JB, V128, P1

- Gillingham K., 2010, WORKING PAPER  
Gillingham K., 2004, PROGRAMS RESOUR FALL, V155, P22  
Gillingham K., 2009, ANNU REV RESOUR ECON, V1, P597, DOI 10.1146/annurev.resource.102308.124234  
Greening LA, 2000, ENER POLICY, V28, P389  
GRILICHES Z, 1957, ECONOMETRICA, V25, P501, DOI 10.2307/1905380  
Haselip J, 2015, ENERGY RES SOC SCI, V5, P78, DOI 10.1016/j.erss.2014.12.016  
HASSETT KA, 1995, J PUBLIC ECON, V57, P201, DOI 10.1016/0047-2727(94)01452-T  
Helms AC, 2012, REG SCI URBAN ECON, V42, P303, DOI 10.1016/j.regsciurbeco.2011.07.005  
Ioannides YM, 2003, J APPL ECONOM, V18, P563, DOI 10.1002/jae.740  
Jacobsen GD, 2013, REV ECON STAT, V95, P34, DOI 10.1162/REST\_a\_00243  
JAFFE AB, 1995, J ENVIRON ECON MANAG, V29, p543, DOI 10.1006/jeem.1995.1060  
JAFFE AB, 1994, RESOUR ENERGY ECON, V16, P91, DOI 10.1016/0928-7655(94)90001-9  
Judson EP, 2014, BUILD RES INF, V42, P501, DOI 10.1080/09613218.2014.894808  
Kahn ME, 2009, BE J ECON ANAL POLI, V9  
Kelso J. D., 2009, BUILD EN DAT BOOK  
KOK N, 2011, P AM EMIL REV, V101, P77, DOI DOI 10.1257/AER.101.3.77  
Lawrence TM, 2005, ASHRAE J, V47, pS40  
Levinson A, 2004, RESOUR ENERGY ECON, V26, P51, DOI [10.1016/S0928-7655(03)00047-2, 10.1016/50928-7655(03)00047-2]  
Lutzenhiser L, 2014, ENERGY RES SOC SCI, V1, P141, DOI 10.1016/j.erss.2014.03.011  
Mathews EH, 2001, ENER BUILDINGS, V33, P853, DOI 10.1016/S0378-7788(01)00075-5  
McCoy D, 2014, ENERGY RES SOC SCI, V3, P89, DOI 10.1016/j.erss.2014.07.008  
Metcalf GE, 1999, REV ECON STAT, V81, P516, DOI 10.1162/003465399558274  
Meyers RJ, 2010, ENER BUILDINGS, V42, P563, DOI 10.1016/j.enbuild.2009.10.026  
Mills BF, 2010, RESOUR ENERGY ECON, V32, P363, DOI 10.1016/j.reseneeco.2009.10.002  
Mlecnik E, 2010, OPEN HOUSE INT, V35, P39  
Nair G, 2010, ENER POLICY, V38, P2956, DOI 10.1016/j.enpol.2010.01.033  
Niemeyer S, 2010, INT J CONSUM STUD, V34, P140, DOI 10.1111/j.1470-6431.2009.00841.x  
Noonan DS, 2013, ENVIRON BEHAV, V45, P476, DOI 10.1177/0013916511421664  
PARENTE SL, 1994, J POLIT ECON, V102, P298, DOI 10.1086/261933  
Paul A., 2011, SUPPLY CURVES CONSER, P11  
Perez-Lombard L, 2011, ENER BUILDINGS, V43, P255, DOI 10.1016/j.enbuild.2010.10.025  
Schelly C, 2014, ENERGY RES SOC SCI, V2, P183, DOI 10.1016/j.erss.2014.01.001  
Sexton SE, 2014, J ENVIRON ECON MANAG, V67, P303, DOI 10.1016/j.jeem.2013.11.004  
Siincoe T., 2011, UNPUB  
Southwell BG, 2014, ENERGY RES SOC SCI, V2, P59, DOI 10.1016/j.erss.2014.03.019  
Tse R. Y. C., 1999, REV URBAN REGIONAL D, V11, P114  
Walker SL, 2014, ENERGY RES SOC SCI, V2, P102, DOI 10.1016/j.erss.2014.04.004  
Wallenborn G, 2014, ENERGY RES SOC SCI, V1, P56, DOI 10.1016/j.erss.2014.03.009  
Wilson C, 2015, ENERGY RES SOC SCI, V7, P12, DOI 10.1016/j.erss.2015.03.002
- NR 66  
TC 4  
Z9 4  
U1 0  
U2 0  
PU ELSEVIER SCIENCE BV  
PI AMSTERDAM  
PA PO BOX 211, 1000 AE AMSTERDAM, NETHERLANDS  
SN 2214-6296  
EI 2214-6326  
J9 ENERGY RES SOC SCI  
JI Energy Res. Soc. Sci.  
PD NOV  
PY 2015  
VL 10  
BP 102  
EP 113  
DI 10.1016/j.erss.2015.07.009



PG 12  
WC Environmental Studies  
SC Environmental Sciences & Ecology  
GA V3Y7J  
UT WOS:000218708600011  
DA 2018-05-03  
ER

PT J  
AU Scott, MJ  
Daly, DS  
Hathaway, JE  
Lansing, CS  
Liu, Y  
McJeon, HC  
Moss, RH  
Patel, PL  
Peterson, MJ  
Rice, JS  
Zhou, YY

AF Scott, Michael J.  
Daly, Don S.  
Hathaway, John E.  
Lansing, Carina S.  
Liu, Ying  
McJeon, Haewon C.  
Moss, Richard H.  
Patel, Pralit L.  
Peterson, Marty J.  
Rice, Jennie S.  
Zhou, Yuyu

TI Calculating impacts of energy standards on energy demand in US buildings  
with uncertainty in an integrated assessment model

SO ENERGY

LA English

DT Article

DE Building-energy demand; Integrated assessment models; Uncertainty  
analysis

ID CLIMATE-CHANGE; POLICY; EFFICIENCY; TECHNOLOGY; MITIGATION; BENEFITS;  
CHINA; PRICE

AB In this paper, an IAM (integrated assessment model) uses a newly-developed Monte Carlo analysis capability to analyze the impacts of more aggressive U.S. residential and commercial building-energy codes and equipment standards on energy consumption and energy service costs at the state level, explicitly recognizing uncertainty in technology effectiveness and cost, socioeconomics, presence or absence of carbon prices, and climate impacts on energy demand. The paper finds that aggressive building-energy codes and equipment standards are an effective, cost-saving way to reduce energy consumption in buildings and greenhouse gas emissions in U.S. states. This conclusion is robust to significant uncertainties in population, economic activity, climate, carbon prices, and technology performance and costs. (C) 2015 Elsevier Ltd. All rights reserved.

C1 [Scott, Michael J.; Daly, Don S.; Hathaway, John E.; Lansing, Carina S.; Liu, Ying; Peterson, Marty J.; Rice, Jennie S.] Pacific NW Natl Lab, Richland, WA 99352 USA.

[McJeon, Haewon C.; Moss, Richard H.; Patel, Pralit L.; Zhou, Yuyu] Univ Maryland, Joint Global Change Res Inst, Pacific NW Natl Lab, College Pk, MD 20742 USA.

RP Scott, MJ (reprint author), POB 999,MSN K6-05, Richland, WA 99352 USA.

EM michael.scott@pnnl.gov

OI Moss, Richard/0000-0001-5005-0063

FU U.S. Department of Energy (DOE) [DE-AC05-76RL01830]

FX The research described in this paper is part of the Platform for

Integrated Modeling and Analysis (PRIMA) Initiative at Pacific Northwest National Laboratory (PNNL). It was conducted under the Laboratory Directed Research and Development Program at PNNL, a multiprogram national laboratory operated by Battelle for the U.S. Department of Energy (DOE) under Contract DE-AC05-76RL01830. The authors wish to thank these organizations for this support and Steven J. Smith for helpful comments, but the authors bear sole responsibility for planning, executing, and reporting this research.

- CR Appliance Standard Awareness Project (ASAP), 2014, APPL STAND AW PROJ A  
 Bedsworth LW, 2013, GLOBAL ENVIRON CHANG, V23, P664, DOI 10.1016/j.gloenvcha.2013.02.004  
 Blum H, 2013, ENERG EFFIC, V6, P65, DOI 10.1007/s12053-012-9162-x  
 Bohlen S, 2013, WHAT IS E SCI SHOULD  
 Caron J, 2012, 220 MIT  
 Clarke L, 2014, CLIMATE CHANGE 2014, P412  
 Delworth TL, 2006, J CLIMATE, V19, P643, DOI 10.1175/JCLI3629.1  
 DSIRE (Database of State Incentives for Renewable & Efficiency, 2013, SAT STAT INC REN EFF  
 Edenhofer O, 2012, ENERGY J, V31, P11  
 Eom J, 2012, ENERGY, V46, P405, DOI 10.1016/j.energy.2012.08.009  
 Fisher BS, 2007, CLIMATE CHANGE 2007, P168  
 Golub A, 2014, ENVIRON MODEL ASSESS, V19, P99, DOI 10.1007/s10666-013-9386-y  
 Gorton I, 2011, IEEE COMPUT SCI ENG, V14, P12  
 Gorton I, 2011, IEEE SOFTWARE, V28, P34, DOI 10.1109/MS.2011.23  
 Gracceva F, 2013, ENERGY, V57, P443, DOI 10.1016/j.energy.2013.06.006  
 Haurie A, 2012, ENVIRON MODEL ASSESS, V17, P1, DOI 10.1007/s10666-011-9271-5  
 Cayan D. R, 2008, CEC5002007123 PIER  
 Koirala BS, 2014, ENERG POLICY, V73, P667, DOI 10.1016/j.enpol.2014.06.022  
 Kraucunas I, 2014, CLIM CHANGE  
 Kyle P, 2010, ENERG J, V31, P145  
 Labriet M, 2012, ENERG ECON, V34, pS366, DOI 10.1016/j.eneco.2012.02.016  
 Lemoine D, 2013, ENVIRON RES LETT, V8, DOI 10.1088/1748-9326/8/3/034019  
 Meehl GA, 2005, SCIENCE, V307, P1679  
 Meehl GA, 2007, CLIMATE CHANGE 2007: THE PHYSICAL SCIENCE BASIS, P747  
 Miara A, 2014, ENERGY, V76, P502, DOI 10.1016/j.energy.2014.08.047  
 Nadel S, 2013, E13D AM COUNC EN EFF  
 Nakicenovic N, 2000, IPCC SPECIAL REPORT  
 Office of Management and Budget, 2003, REG ANAL OFF MAN BUD  
 Peterson S, 2006, ENVIRON MODEL ASSESS, V11, P1, DOI 10.1007/s10666-005-9014-6  
 R Core Team, 2013, R LANG ENV STAT COMP  
 Rice JS, 2012, MITIG ADAPT STRAT GL, V17, P805, DOI 10.1007/s11027-011-9345-3  
 Rogelj J, 2013, NATURE, V493, P79, DOI 10.1038/nature11787  
 Rosen RA, 2015, TECHNOL FORECAST SOC, V91, P93, DOI 10.1016/j.techfore.2014.01.013  
 Scott MJ, 2014, ENERG ECON, V43, P22, DOI 10.1016/j.eneco.2014.01.012  
 Scott MJ, 2014, CALCULATING IMPACTS  
 Tonn B, 2007, ENERG POLICY, V35, P3665, DOI 10.1016/j.enpol.2007.01.009  
 United Nations, 2013, WORLD POP PROSP 2012  
 U. S. Census Bureau, 2013, 2012 NAT POP PROJ SU  
 US Census Bureau, 2005, 2005 INTERIM CENSUS  
 US Department of Energy, 2013, APPL EQ STAND RES LA  
 U.S. Energy Information Administration, ASS AEO2014  
 Van Buskirk RD, 2014, ENVIRON RES LETT, V9, DOI 10.1088/1748-9326/9/11/114010  
 Webster M, 2012, CLIMATIC CHANGE, V112, P569, DOI 10.1007/s10584-011-0260-0  
 Wei M, 2013, ENVIRON RES LETT, V8, DOI 10.1088/1748-9326/8/1/014038  
 Weiss M, 2010, ENERG POLICY, V38, P770, DOI 10.1016/j.enpol.2009.10.022  
 Wilkerson JT, 2015, ENERG POLICY, V76, P18, DOI 10.1016/j.enpol.2014.10.011  
 Sue Wing I, 2008, RPP200803 MOSS RAHM  
 Zhou WJ, 2014, ENERGY, V73, P670, DOI 10.1016/j.energy.2014.06.068  
 Zhou YY, 2014, APPL ENERG, V113, P1077, DOI 10.1016/j.apenergy.2013.08.034  
 [Anonymous], 2006, STERN REV GLOB CLIM

NR 50

TC 4

Z9 4

U1 2

U2 10

PU PERGAMON-ELSEVIER SCIENCE LTD

PI OXFORD

PA THE BOULEVARD, LANGFORD LANE, KIDLINGTON, OXFORD OX5 1GB, ENGLAND

SN 0360-5442

EI 1873-6785

J9 ENERGY

J1 Energy

PD OCT

PY 2015

VL 90

BP 1682

EP 1694

DI 10.1016/j.energy.2015.06.127

PN 2

PG 13

WC Thermodynamics; Energy & Fuels

SC Thermodynamics; Energy & Fuels

GA CV4OB

UT WOS:000364245300045

DA 2018-05-03

ER

PT J

AU Zvingilaite, E

Jacobsen, HK

AF Zvingilaite, Erika

Jacobsen, Henrik Klinge

TI Heat savings and heat generation technologies: Modelling of residential investment behaviour with local health costs

SO ENERGY POLICY

LA English

DT Article

DE Energy savings; Externalities; Modelling; Residential heating; Rebound

ID ENERGY EFFICIENCY; EXTERNAL COSTS; ELECTRICITY-GENERATION; BUILDING SECTOR; POWER-SYSTEM; INTERNALIZATION; OPTIMIZATION; CONSUMPTION; BENEFITS; DEMAND

AB The trade-off between investing in energy savings and investing in individual heating technologies with high investment and low variable costs in single family houses is modelled for a number of building and consumer categories in Denmark. For each group the private economic cost of providing heating comfort is minimised. The private solution may deviate from the socio-economical optimal solution and we suggest changes to policy to incentivise the individuals to make choices more in line with the socioeconomic optimal mix of energy savings and technologies.

The households can combine their primary heating source with secondary heating e.g. a woodstove. This choice results in increased indoor air pollution with fine particles causing health effects. We integrate health cost due to use of woodstoves into household optimisation of heating expenditures.

The results show that due to a combination of low costs of primary fuel and low environmental performance of woodstoves today, included health costs lead to decreased use of secondary heating.

Overall the interdependence of heat generation technology- and heat saving-choice is significant. The total optimal level of heat savings for private consumers decrease by 66% when all have the option to shift to the technology with lowest variable costs. (C) 2014 Elsevier Ltd. All rights reserved.

C1 [Zvingilaite, Erika; Jacobsen, Henrik Klinge] Tech Univ Denmark, DTU Management Engn, Syst Anal Div, DK-4000 Roskilde, Denmark.

- RP Jacobsen, HK (reprint author), Tech Univ Denmark, DTU Management Engrn, Syst Anal Div, POB 49, DK-4000 Roskilde, Denmark.  
EM jhja@dtu.dk  
OI Klinge Jacobsen, Henrik/0000-0002-3269-4807  
FU Danish Strategic Research Program [2104-06-0027]  
FX The presented study is part of the research in Centre for Energy, Environment and Health, financed by The Danish Strategic Research Program on Sustainable Energy under Contract no. 2104-06-0027.  
CR Amstalden RW, 2007, ENER POLICY, V35, P1819, DOI 10.1016/j.enpol.2006.05.018  
Moller Andersen F., 2010, EMMA10 ENERGY ENV SU  
Andersen M.S., 2008, P 16 ANN C EUR ASS E  
Banfi S, 2008, ENER ECON, V30, P503, DOI 10.1016/j.eneco.2006.06.001  
Brandt J., 2011, 3 CEEH  
Clinch JP, 2001, ENER POLICY, V29, P113, DOI 10.1016/S0301-4215(00)00110-5  
Danish Ecological Council, 2012, AK BEH AFG BRAEND  
Danish Energy Agency, 2011, FOR SAMF AN REC ASS  
DEA, 2011, EN STAT 2009  
DERA, 2011, NAT GAS EL PRIC  
EOF, 2011, OIL PRIC  
European Commission, 2011, DAT EN SAV POT  
Evald A., 2010, BRAENDEFORBRUG DANMA  
Fouquet R, 2014, REV ENV ECON POLICY, V8, P186, DOI 10.1093/reep/reu002  
Gaterell MR, 2005, ENER BUILDINGS, V37, P1017, DOI 10.1016/j.enbuild.2004.12.004  
Gebremedhin A, 2002, APPL ENER, V73, P223, DOI 10.1016/S0306-2619(02)00116-2  
Giraudet LG, 2012, ENER ECON, V34, P426, DOI 10.1016/j.eneco.2011.07.010  
Greening LA, 2000, ENER POLICY, V28, P389  
Gronvald, 2007, HER ER 10 BEDSTE BRA  
Holmgren K, 2007, ENER POLICY, V35, P5242, DOI 10.1016/j.enpol.2007.04.026  
IPCC, 2007, CLIMATE CHANGE 2007  
Jacobsen HK, 2000, ENERGY J, V21, P43  
Jakob M, 2006, ENER POLICY, V34, P172, DOI 10.1016/j.enpol.2004.08.039  
Karlsson K. B., 2011, P 6 DUBR C SUST DEV  
Klaassen G, 2007, ENER POLICY, V35, P815, DOI 10.1016/j.enpol.2006.03.007  
Kragh J., 2010, DANSKE BYGNINGERS EN  
Kudelko M, 2006, ENER POLICY, V34, P3409, DOI 10.1016/j.enpol.2005.01.005  
Leth-Petersen S, 2001, ENER ECON, V23, P387, DOI 10.1016/S0140-9883(00)00078-5  
Meier H, 2010, ENER ECON, V32, P949, DOI 10.1016/j.eneco.2009.11.008  
Moller B, 2008, MANAG ENVIRON QUAL, V19, P467, DOI 10.1108/14777830810878650  
Nielsen O.K., 2010, ANN DANISH INFORM IN  
ODYSSEE, 2009, EN EFF TRENDS SECT E  
Olesen H.R., 2010, BRAENDEFYRINGS BIDRA  
Petersen LK, 2008, J ENVIRON POL PLAN, V10, P423, DOI 10.1080/15239080802503626  
Chow JC, 2006, J AIR WASTE MANAGE, V56, P707, DOI 10.1080/10473289.2006.10464485  
Rafaj P, 2007, ENER POLICY, V35, P828, DOI 10.1016/j.enpol.2006.03.003  
Ramboll Danmark, 2008, VIR HEAT PLAN DENM A  
SBI, 2007, PRIV UD ROLL BOL REG  
Siller T, 2007, ENER POLICY, V35, P529, DOI 10.1016/j.enpol.2005.12.021  
Sonderskovhjemmet, 2011, WOOD PRIC  
Sorrell S, 2009, ENER POLICY, V37, P1356, DOI 10.1016/j.enpol.2008.11.026  
Sydjyskstoker, 2011, WOOD PELL PRIC  
Tommerup H, 2006, ENER BUILDINGS, V38, P618, DOI 10.1016/j.enbuild.2005.08.017  
Tommerup H, 2010, CATALOGUE ENERGY SAV  
Wittchen K., 2004, VURDERING POTENTIALE  
Zhang QY, 2007, ENER POLICY, V35, P4295, DOI 10.1016/j.enpol.2006.12.026  
Zvingilaite E, 2014, ENER BUILDINGS, V82, P173, DOI 10.1016/j.enbuild.2014.06.046  
Zvingilaite E, 2013, ENER POLICY, V55, P57, DOI 10.1016/j.enpol.2012.09.056  
Zvingilaite E, 2011, APPL ENER, V88, P535, DOI 10.1016/j.apenergy.2010.08.007

TC 4  
 Z9 4  
 U1 0  
 U2 8  
 PU ELSEVIER SCI LTD  
 PI OXFORD  
 PA THE BOULEVARD, LANGFORD LANE, KIDLINGTON, OXFORD OX5 1GB, OXON, ENGLAND  
 SN 0301-4215  
 EI 1873-6777  
 J9 ENER POLICY  
 JI Energy Policy  
 PD FEB  
 PY 2015  
 VL 77  
 BP 31  
 EP 45  
 DI 10.1016/j.enpol.2014.11.032  
 PG 15  
 WC Economics; Energy & Fuels; Environmental Sciences; Environmental Studies  
 SC Business & Economics; Energy & Fuels; Environmental Sciences & Ecology  
 GA CB3DH  
 UT WOS:000349507900004  
 DA 2018-05-03  
 ER

PT S  
 AU Mehdi, G  
     Roshchin, M  
 AF Mehdi, Gulnar  
     Roshchin, Mikhal  
 BE Howlett, RJ  
 TI Electricity consumption constraints for smart-home automation: An  
     overview of models and applications  
 SO SUSTAINABILITY IN ENERGY AND BUILDINGS: PROCEEDINGS OF THE 7TH  
     INTERNATIONAL CONFERENCE SEB-15  
 SE Energy Procedia  
 LA English  
 DT Proceedings Paper  
 CT 7th International Conference on Sustainability and Energy in Buildings  
     (SEB)  
 CY JUL 01-03, 2015  
 CL Lisbon, PORTUGAL  
 SP KES Int, Univ Nova Lisbon, UNINOVA Res Inst  
 DE energy; agents; modeling; constraints; residential loads; smart-home  
 AB The global energy consumption challenge can largely be addressed by adoption of smart-home  
     autonomous agents, allowing adaptive scheduling of electronic devices - for household and businesses  
     alike. The realization of this smart architecture necessitates the agents need to know their decision space, in  
     order to schedule different devices according to their individual constraints. Some of these constraints can  
     be set by the owner, for example, timelines for washing machine or charging electric vehicles, not  
     necessitating a smart agent. However, most appliances are subject to physical constraints, for example,  
     washing machine being non-interruptible, and consequently, the modeling of the decision space is non-  
     trivial. This paper gives an overview of smart-agent based models for different electric devices and  
     appliances using their individual non-trivial energy consumption constraints, and proposes solutions for  
     appliance optimization and scheduling. (C) 2015 The Authors. Published by Elsevier Ltd.  
 C1 [Mehdi, Gulnar; Roshchin, Mikhal] Siemens AG, D-81739 Munich, Germany.  
 RP Mehdi, G (reprint author), Siemens AG, D-81739 Munich, Germany.  
 EM gulnar.mehdi.ext@siemens.com  
 CR BP, 2013, STAT REV WORLD EN

Cavone D., 2011, WOA, P105  
 Gabbar HA, 2014, ENRGY PROCED, V62, P666, DOI 10.1016/j.egypro.2014.12.430  
 Hirl B., 2012, ENERGY EFFICIENCY ST  
 Koch S., 2011, IEEE 17 POW SYST COM  
 KRANING M, 2013, FDN TRENDS OPTIM, V1, P70  
 Lu N, 2012, IEEE T SMART GRID, V3, P1263, DOI 10.1109/TSG.2012.2183649  
 Mohsenian-Rad AH, 2010, IEEE T SMART GRID, V1, P320, DOI 10.1109/TSG.2010.2089069  
 Mohsenian-Rad AH, 2010, IEEE T SMART GRID, V1, P120, DOI 10.1109/TSG.2010.2055903  
 Parra J., 2009, INT J SMART HOME, V3, P39  
 Ramchurn SD, 2011, P 10 INT C AUT AG MU, V1, P5  
 Turner WJN, 2014, ENRGY PROCED, V62, P160, DOI 10.1016/j.egypro.2014.12.377  
 Wu C. T. M., 2012, INNOVATIVE SMART GRI, P1  
 York D., 2007, EXAMINING PEAK DEMAN  
 [Anonymous], 2014, SIEMENS ENV PORTFOLI  
 NR 15  
 TC 4  
 Z9 4  
 U1 0  
 U2 0  
 PU ELSEVIER SCIENCE BV  
 PI AMSTERDAM  
 PA SARA BURGERHARTSTRAAT 25, PO BOX 211, 1000 AE AMSTERDAM, NETHERLANDS  
 SN 1876-6102  
 J9 ENRGY PROCED  
 PY 2015  
 VL 83  
 BP 60  
 EP 68  
 DI 10.1016/j.egypro.2015.12.196  
 PG 9  
 WC Construction & Building Technology; Energy & Fuels  
 SC Construction & Building Technology; Energy & Fuels  
 GA BE1XD  
 UT WOS:000368675200006  
 OA gold  
 DA 2018-05-03  
 ER  
  
 PT B  
 AU Opris, I  
     Costinas, S  
     Ionescu, C  
     Nistoran, D  
 AF Opris, Ioana  
     Costinas, Sorina  
     Ionescu, Cristina  
     Nistoran, Daniela  
 GP IEEE  
 TI The Household Energy Consumer in a Smart Metering Environment  
 SO 2015 9TH INTERNATIONAL SYMPOSIUM ON ADVANCED TOPICS IN ELECTRICAL  
     ENGINEERING (ATEE)  
 LA English  
 DT Proceedings Paper  
 CT 9th International Symposium on Advanced Topics in Electrical Engineering  
     (ATEE)  
 CY MAY 07-09, 2015  
 CL Univ Politehnica Bucharest, Fac Elect Engr, Bucharest, ROMANIA  
 SP IEEE

HO Univ Politehnica Bucharest, Fac Elect Engrn  
DE smart metering; household energy consumer; EU policy; attitude of  
electricity consumer

AB Present time is characterized by important changes, determined by significant advances in technology.

The modern society is information oriented, technology dependent and collaborative-network active. The paper discusses the existing conditions of the transition period from the old meters to the smart meters, in terms of its impact and considering the different types of electricity consumers. It also addresses the future perspectives of the smart meters implementation in the context of actual technological changes. As the young Web 2.0 generation is moving into adulthood, smart metering systems will be more easily accepted and their use will have a better consumer feedback. To obtain the most benefits from smart metering systems, the household energy consumer must be actively involved in the planning process from its early stages, to become both a real actor in shaping the future implementation and an aware customer who adopts good demand side behaviour.

C1 [Opris, Ioana; Costinas, Sorina; Ionescu, Cristina; Nistoran, Daniela] Univ Politehn Bucuresti, Bucharest, Romania.

RP Opris, I (reprint author), Univ Politehn Bucuresti, Bucharest, Romania.

EM ioana.opris@upb.ro; sorina.costinas@upb.ro; cristina.ionescu@upb.ro;  
daniela.nistoran@upb.ro

RI Opris, Ioana/M-9861-2013; COSTINAS, Sorina/B-8860-2014

OI Opris, Ioana/0000-0002-1916-8167; COSTINAS, Sorina/0000-0002-4408-5232;

Gogoase Nistoran, Daniela Elena/0000-0002-8841-0981

CR Avery N., 2013, ANECS EUR C SMART GR

Borrego M, 2010, REV HIGH EDUC, V34, P61

COSTINAS S, 2014, INT C OPT EL EL EQ O, P124

Darby S, 2010, BUILD RES INF, V38, P442, DOI 10.1080/09613218.2010.492660

Darby SJ, 2012, ENERG POLICY, V49, P98, DOI 10.1016/j.enpol.2011.11.065

Darnton A., 2008, GSR BEHAV CHANGE KNO

Franssen Maarten, 2010, STANFORD ENCY PHILOS

Guria A., 2012, OECD OBSERVER, pQ4

Hec D., 2013, CEN CENELEC ETSI SM

Hierzinger R., 2012, EUROPEAN SMART METER

Hyldmar F., 2013, ESMIGS EUR C SMART G

[Anonymous], 2012, SMART METERING ROMAN

Levinson M, 2010, ISSUES SCI TECHNOL, V27, P39

Lewis P.E., 2012, ESMIGS SMART MET EMP

Mourik R., 2015, BEHAV CHANGES ARE NE

Newey G., 2013, GOVT MUST NUDGE PEOP

Opris I., 2013, P 12 INT C ENV EL EN, P409

Segovia R., 2011, JOINT CONTRIBUTION D

Valocchi M., 2007, G510787200 IBM EN UT

Valocchi M., 2009, GBE03187USEN00 IBM E

[Anonymous], 2011, CISC VIS NETW IND GL

[Anonymous], 2014, MONITORUL OFICIAL

[Anonymous], 2010, EIE06031 BEAMA PROJ

[Anonymous], 2013, ROMANIAN BUSINE 0719, Patent No. Romanian Business News - ActMedia

[Anonymous], 2012, OFFICIAL J EUROPEA L, VL73/9

NR 25

TC 4

Z9 4

U1 1

U2 13

PU IEEE

PI NEW YORK

PA 345 E 47TH ST, NEW YORK, NY 10017 USA

BN 978-1-4799-7514-3

PY 2015

BP 43

EP 48

PG 6

WC Engineering, Electrical & Electronic

SC Engineering

GA BE1MY

UT WOS:000368159800009

DA 2018-05-03

ER

PT J

AU Soares, N

Pereira, LD

Ferreira, J

Conceicao, P

da Silva, PP

AF Soares, Nelson

Pereira, Luisa Dias

Ferreira, Joao

Conceicao, Pedro

da Silva, Patricia Pereira

TI Energy efficiency of higher education buildings: a case study

SO INTERNATIONAL JOURNAL OF SUSTAINABILITY IN HIGHER EDUCATION

LA English

DT Article

DE Sustainability; Energy efficiency; Higher education; Energy audit; Green campus; Sustainable behaviours

ID BUSINESS EDUCATION; BUILT ENVIRONMENT; SUSTAINABILITY; MANAGEMENT; BEHAVIOR

AB Purpose - This paper aims to propose an energy efficiency plan (with technical and behavioural improvement measures) for a Portuguese higher education building - the Teaching Building of the Faculty of Economics of the University of Coimbra (FEUC).

Design/methodology/approach - The study was developed in the context of both the "Green Campus - Challenge for Energy Efficiency in Higher Education" and the Energy for Sustainability Initiative of the University of Coimbra, Portugal. An energy audit was conducted based on the analysis of the energy consumption profiles. A monitoring campaign was carried out to measure and disaggregate the electricity consumption. The consumption of natural gas and water were also assessed. The building envelope and the heating and lighting systems were also evaluated. Some patterns of energy-environmental behaviours of the academic community were investigated through a Web-based survey.

Findings - The energy efficiency plan contemplates short-term tangible/intangible actions. It also considers the investment and payback period of the tangible measures. The implementation of three improvement measures in the lighting system would lead to a consumption reduction of about 26,123 kWh/year, avoiding the emission of 3,704 KgCO<sub>2</sub>/year, for an initial cost of (sic)9,920 (payback period of 3.7 years).

Research limitations/implications - Results are restricted to the case study and there are limitations in their generalisation outside of their context. However, they show some broadly implications and trends that have relevance for the higher education sector. This paper highlights the importance of engaging students, faculty and technical staff for working together on the assessment of the energy efficiency of the buildings where they study and work.

Social implications - The higher education sector holds important functions in educating the next generation of professionals for a sustainable culture. The categories of activities described in this paper are good examples of what can be done within the academic community for acting towards sustainability. The results also pointed out that making users aware of their energy consumption is a priority towards the energy efficiency in higher education buildings.

Originality/value - Reductions on energy consumption are expected if the energy efficiency plan would be implemented. The results of the behavioural study were presented to the FEUC's board of directors to be integrated in the "Good Practices Manual on Water and Energy Management".

C1 [Soares, Nelson; Pereira, Luisa Dias; Ferreira, Joao; da Silva, Patricia Pereira] Univ Coimbra, EFS Initiat, MIT Portugal Program, Coimbra, Portugal.

[Soares, Nelson; Pereira, Luisa Dias] Univ Coimbra, Dept Mech Engr, ADAI, LAETA, Coimbra, Portugal.

[Soares, Nelson] Univ Coimbra, Dept Civil Engr, ISISE, Coimbra, Portugal.



- [Ferreira, Joao] Univ Coimbra, Fac Econ, GEMF, Coimbra, Portugal.  
 [Conceicao, Pedro] Univ Coimbra, Dept Elect & Comp Engn, Coimbra, Portugal.  
 [da Silva, Patricia Pereira] Univ Coimbra, Fac Econ, INESC Coimbra, Coimbra, Portugal.  
 RP Soares, N (reprint author), Univ Coimbra, EFS Initiat, MIT Portugal Program, Coimbra, Portugal.  
 EM nelson.soares@dem.uc.pt  
 RI Pereira da Silva, Patricia/T-8544-2017  
 OI Pereira da Silva, Patricia/0000-0002-5862-1278; Soares,  
 Nelson/0000-0002-9294-8573; Dias Pereira, Luisa/0000-0003-1312-8137;  
 Ferreira, Joao Pedro/0000-0002-6726-7856  
 FU Portuguese Foundation for Science and Technology (FCT)  
 [SFRH/BD/51640/2011]; FCT [SFRH/BD/77105/2011, SFRH/BD/76357/2011,  
 PEst-C/EEI/UI0308/2011]; Energy for Sustainability Initiative of the  
 University of Coimbra; project Energy and Mobility for Sustainable  
 Regions - EMSURE [CENTRO-07-0224-FEDER-002004]  
 FX The first author acknowledges the support provided by the Portuguese  
 Foundation for Science and Technology (FCT) under the PhD scholarship  
 SFRH/BD/51640/2011 in the framework of the MIT-Portugal Program. The  
 second and the third authors acknowledge the support provided by FCT  
 under the PhD scholarships SFRH/BD/77105/2011 and SFRH/BD/76357/2011,  
 respectively. This study was partially supported by FCT under the  
 project grant PEst-C/EEI/UI0308/2011 and the Energy for Sustainability  
 Initiative of the University of Coimbra. It was also supported by the  
 project Energy and Mobility for Sustainable Regions - EMSURE  
 (CENTRO-07-0224-FEDER-002004).  
 CR Abreu I., 2010, CONSTRUCAO MAGAZINE, V35, P23  
 AJZEN I, 1991, ORGAN BEHAV HUM DEC, V50, P179, DOI 10.1016/0749-5978(91)90020-T  
 Alshuwaikhat HM, 2008, J CLEAN PROD, V16, P1777, DOI 10.1016/j.jclepro.2007.12.002  
 Andaloro APF, 2010, ENERG POLICY, V38, P5840, DOI 10.1016/j.enpol.2010.05.039  
 Barata E, 2011, CITIES, V28, P406, DOI 10.1016/j.cities.2011.04.001  
 Batterman SA, 2011, J PROF ISS ENG ED PR, V137, P198, DOI 10.1061/(ASCE)EI.1943-5541.0000069  
 Cansino JM, 2011, ENERG POLICY, V39, P3803, DOI 10.1016/j.enpol.2011.04.010  
 Carbon Trust, 2011, IMPL THERM INS HVAC  
 CEC, 2006, ACT PLAN EN EFF REAL  
 Conceicao P., 2012, THESIS U COIMBRA POR  
 Cravo A., 2012, PORT C EC EN EF COIM  
 Dahle M., 2001, INT J SUSTAINABILITY, V2, P139, DOI [10.1108/14676370110388363, DOI  
 10.1108/14676370110388363]  
 Egging R, 2013, ENERG POLICY, V62, P617, DOI 10.1016/j.enpol.2013.07.022  
 Ekins P, 2008, ENERG POLICY, V36, P4580, DOI 10.1016/j.enpol.2008.09.006  
 European Commission, 2011, COM2011109 EUR COMM  
 Fabi V, 2013, HVAC&R RES, V19, P635, DOI 10.1080/10789669.2013.789372  
 Fabi V, 2012, BUILD ENVIRON, V58, P188, DOI 10.1016/j.buildenv.2012.07.009  
 International Energy Agency, 2003, CREAT MARK EN TECHN  
 Janos L.M., 2011, THESIS FEUC COIMBRA  
 Jollands N, 2010, ENERG POLICY, V38, P6409, DOI 10.1016/j.enpol.2009.11.090  
 Jones P., 2008, INT J EDUC RES, V47, P341, DOI DOI 10.1016/J.IJER.2008.11.001  
 Littledyke M, 2013, INT J SUST HIGHER ED, V14, P367, DOI 10.1108/IJSHE-01-2012.0011  
 Mochizuki Y, 2010, INT J SUST HIGHER ED, V11, P391, DOI 10.1108/14676371011077603  
 Naeem M, 2012, INT J SUST HIGHER ED, V13, P60, DOI 10.1108/14676371211190317  
 Raslan R, 2012, BUILD RES INF, V40, P305, DOI 10.1080/09613218.2012.681440  
 Gonzalez ABR, 2012, ENERG POLICY, V51, P417, DOI 10.1016/j.enpol.2012.08.050  
 Rusinko CA, 2010, ACAD MANAG LEARN EDU, V9, P507, DOI 10.5465/AMLE.2010.53791831  
 Shephard K, 2008, INT J SUST HIGHER ED, V9, P87, DOI DOI 10.1108/14676370810842201  
 Sherman Peter, 2010, International Journal of Environment and Sustainable Development, V9, P241, DOI  
 10.1504/IJESD.2010.029974  
 Thomas I., 2004, INT J SUSTAINABILITY, V5, P33, DOI DOI 10.1108/14676370410517387  
 Travezan JY, 2013, ENERG POLICY, V61, P317, DOI 10.1016/j.enpol.2013.05.096  
 [Anonymous], 2013, ADV EN RETR GUID PRA

NR 32  
TC 4  
Z9 4  
U1 5  
U2 31  
PU EMERALD GROUP PUBLISHING LIMITED  
PI BINGLEY  
PA HOWARD HOUSE, WAGON LANE, BINGLEY BD16 1WA, W YORKSHIRE, ENGLAND  
SN 1467-6370  
EI 1758-6739  
J9 INT J SUST HIGHER ED  
JI Int. J. Sustain. High. Educ.  
PY 2015  
VL 16  
IS 5  
BP 669  
EP 691  
DI 10.1108/IJSHE-11-2013-0147  
PG 23  
WC GREEN & SUSTAINABLE SCIENCE & TECHNOLOGY; Education & Educational  
Research  
SC Science & Technology - Other Topics; Education & Educational Research  
GA CQ4KG  
UT WOS:000360573000005  
DA 2018-05-03  
ER

PT J  
AU Garcia-Navarro, J  
Gonzalez-Diaz, MJ  
Valdivieso, M  
AF Garcia-Navarro, J.  
Gonzalez-Diaz, M. J.  
Valdivieso, M.  
TI Assessment of construction costs and energy consumption resulting from  
house energy ratings in a residential building placed in Madrid:  
"Precost&e Study"

SO INFORMES DE LA CONSTRUCCION

LA Spanish

DT Article

DE Energy efficiency; energy rating; construction cost; economic impact;  
passive architecture

ID CONSERVATION; PERFORMANCE; EFFICIENCY; DESIGN; SHAPE

AB This paper presents a case study that relates the energy efficiency of a building, its construction costs and its energy consumption. The variation of the energy performance of the dwellings -and its energy rating- is made through changes in the envelope and the energy production systems. This theoretical study was conducted during the years 2009-2010 on the project of a residential block of apartments located in Madrid. The paper develops a methodology to evaluate the energy efficiency variations in a project and its economic implications. This will enable developers and architects to assess how the adoption of active and passive solutions affects the energy rating of a building, its energy consumption and its construction costs. The relationship between the orientation of housing and its energy rating, and the characteristics of the calculation programs used is also analyzed.

C1 [Garcia-Navarro, J.; Gonzalez-Diaz, M. J.; Valdivieso, M.] Univ Politecn Madrid, giSCI, E-28040 Madrid, Spain.

RP Garcia-Navarro, J (reprint author), Univ Politecn Madrid, giSCI, E-28040 Madrid, Spain.

EM justo.gnavarro@upm.es

RI GARCIA NAVARRO, JUSTO/L-9419-2014

OI GARCIA NAVARRO, JUSTO/0000-0002-5268-1587

CR Boermans T., 2007, U VALUES BETTER ENER  
 CTE, 2009, PROGR LID  
 Cuerdo-Vilches M.T., 2008, C NAC MED AMB CUMBR  
 Depecker P, 2001, BUILD ENVIRON, V36, P627, DOI 10.1016/S0360-1323(00)00044-5  
 Ding GKC, 2008, J ENVIRON MANAGE, V86, P451, DOI 10.1016/j.jenvman.2006.12.025  
 Entrop AG, 2010, ENERG BUILDINGS, V42, P618, DOI 10.1016/j.enbuild.2009.10.032  
 Escorcía O, 2012, INF CONSTR, V64, P563, DOI 10.3989/ic.11.143  
 Gieseler UDJ, 2004, RENEW ENERG, V29, P369, DOI 10.1016/S0960-1481(03)00254-4  
 GORGOLEWSKI M, 1995, BUILD ENVIRON, V30, P583, DOI 10.1016/0360-1323(95)00011-T  
 Hamza N, 2009, BUILD ENVIRON, V44, P929, DOI 10.1016/j.buildenv.2008.06.010  
 Jedrzejuk H, 2002, BUILD ENVIRON, V37, P1379, DOI 10.1016/S0360-1323(01)00101-9  
 MINETUR, PROC SIMPL CERT EF E  
 MINETUR-IDAE, 2009, CAL VYP V1 0 MAN US  
 Perez-Lombard L, 2008, ENERG BUILDINGS, V40, P394, DOI 10.1016/j.enbuild.2007.03.007  
 Romero M, 2008, AEI AISLAMIENTO IMPE, V47, P50  
 Rua MJ, 2012, INF CONSTR, V64, P307, DOI 10.3989/ic.11.028  
 Sanchez F., 2006, BUILD ENVIRON, V41, P1231  
 Schaltegger S, 2002, J ENVIRON MANAGE, V65, P339, DOI 10.1006/jema.2002.0555  
 Zhang H, 2011, SCI CHINA TECHNOL SC, V54, P1639, DOI 10.1007/s11431-011-4357-5

NR 19

TC 4

Z9 4

U1 0

U2 9

PU INST CIENCIAS CONSTRUCCION EDUARDO TORROJA

PI MADRID

PA SERRANO GALVACHE, 4, 28033 MADRID, SPAIN

SN 0020-0883

EI 1988-3234

J9 INF CONSTR

JI Inf. Constr.

PD JUL-SEP

PY 2014

VL 66

IS 535

AR e026

DI 10.3989/ic.13.052

PG 10

WC Construction & Building Technology

SC Construction & Building Technology

GA AQ8YB

UT WOS:000343125000001

OA gold

DA 2018-05-03

ER

PT B

AU Alhamoud, A

Ruettiger, F

Reinhardt, A

Englert, F

Burgstahler, D

Bohnstedt, D

Gottron, C

Steinmetz, R

AF Alhamoud, Alaa

Ruettiger, Felix

Reinhardt, Andreas

Englert, Frank  
 Burgstahler, Daniel  
 Boehnstedt, Doreen  
 Gottron, Christian  
 Steinmetz, Ralf  
 BE Aschenbruck, N  
 Kanhere, S  
 Akkaya, K  
 TI SMARTENERGY.KOM: An Intelligent System for Energy Saving in Smart Home  
 SO 2014 IEEE 39TH CONFERENCE ON LOCAL COMPUTER NETWORKS WORKSHOPS (LCN  
 WORKSHOPS)

LA English

DT Proceedings Paper

CT 39th Annual IEEE Conference on Local Computer Networks (LCN)

CY SEP 08-11, 2014

CL Edmonton, CANADA

SP IEEE, IEEE Comp Soc, Tech Comm Comp Commun, Alberta Innovates, TELUS

AB Over the last twenty years, energy conservation has always been of great importance to individuals, societies and decision makers around the globe. As a result, IT researchers have shown a great interest in providing efficient, reliable and easy-to-use IT services which help users saving energy at home by making use of the current advances in Information and Communications Technology (ICT). Driven by the aforementioned motivation, we developed SMARTENERGY.KOM, our framework for realizing energy efficient smart homes based on wireless sensor networks and human activity detection. Our work is based on the idea that most of the user activities at home are related to a set of electrical appliances which are necessary to perform these activities. Therefore, we show how it is possible to detect the user's current activity by monitoring his fine-grained appliance-level energy consumption. This relation between activities and electrical appliances makes it possible to detect appliances which could be wasting energy at home. Our framework is organized in two components. On one hand, the activity detection framework which is responsible for detecting the user's current activity based on his energy consumption. On the other hand, the EnergyAdvisor framework which utilizes the activity detection for the purpose of recognizing the appliances which are wasting energy at home and informing the user about optimization potential.

C1 [Alhamoud, Alaa; Ruettiger, Felix; Englert, Frank; Burgstahler, Daniel; Boehnstedt, Doreen; Gottron, Christian; Steinmetz, Ralf] Tech Univ Darmstadt, Darmstadt, Germany.

[Reinhardt, Andreas] Univ New S Wales, Sch Engn & Comp Sci, Sydney, NSW, Australia.

RP Alhamoud, A (reprint author), Tech Univ Darmstadt, Darmstadt, Germany.

EM alaa.alhamoud@kom.tu-darmstadt.de; felix.ruettiger@kom.tu-darmstadt.de;

andreasr@cse.unsw.edu.au; frank.englert@kom.tu-darmstadt.de;

daniel.burgstahler@kom.tu-darmstadt.de;

doreen.bohnstedt@kom.tu-darmstadt.de;

christian.gottron@kom.tu-darmstadt.de;

ralf.steinmetz@kom.tu-darmstadt.de

CR Appelratli H.-J., 2012, MIGRATION INTERNET E

Barbato A., 2009, BUILDSYS, P49

Breiman L, 2001, MACH LEARN, V45, P5, DOI 10.1023/A:1010933404324

Callaghan V, 2004, BT TECHNOL J, V22, P233, DOI 10.1023/B:BTTJ.0000047137.42670.4d

Chen C, 2013, PERVASIVE MOB COMPUT, V9, P161, DOI 10.1016/j.pmcj.2012.10.004

Cook DJ, 2003, PROCEEDINGS OF THE FIRST IEEE INTERNATIONAL CONFERENCE ON PERVASIVE COMPUTING AND COMMUNICATIONS (PERCOM 2003), P521, DOI 10.1109/PERCOM.2003.1192783

European Commission, 2008, COM2008772 EUR COMM

Eurelectric, 2010, EURELECTRIC POWER ST

Geisser S, 1993, PREDICTIVE INFERENCE

Hall M., 2009, SIGKDD EXPLORATIONS, V11, P10, DOI DOI 10.1145/1656274.1656278

Kastner W, 2010, P 8 IEEE INT WORKSH, P169

Kim Y., 2008, P 5 WORKSH HOT TOP E

Lee S. Chiang, AAAI WORKSHOPS, VWS-10-05

Mozer M. C., 1998, P AM ASS ART INT SPR, P110

Reinisch C., 2010, P 4 IEEE INT C DIG E, P256

Rutishauser U, 2005, IEEE T SYST MAN CY A, V35, P121, DOI 10.1109/TSMCA.2004.838459

Sandhu J., 2004, AAAI WORKSH SENS NET, P131

NR 17

TC 4

Z9 4

U1 2

U2 2

PU IEEE

PI NEW YORK

PA 345 E 47TH ST, NEW YORK, NY 10017 USA

BN 978-1-4799-3784-4

PY 2014

BP 685

EP 692

PG 8

WC Computer Science, Theory & Methods; Engineering, Electrical & Electronic

SC Computer Science; Engineering

GA BC4GQ

UT WOS:000352496500025

DA 2018-05-03

ER

PT S

AU Gentile, N

Laike, T

Dubois, MC

AF Gentile, Niko

Laike, Thorbjorn

Dubois, Marie-Claude

BE Lentz, A

Renne, D

TI Lighting control systems in peripheral offices rooms at high latitude:

measurements of electricity savings and users preferences

SO 2013 ISES SOLAR WORLD CONGRESS

SE Energy Procedia

LA English

DT Proceedings Paper

CT ISES Solar World Congress (SWC)

CY NOV 03-07, 2013

CL Cancun, MEXICO

SP ISES

DE Lighting control systems; human factor; daylight-linked system; energy saving

AB An efficient lighting control systems (LCS) should take advantage of the natural light available, but this presents some technical challenges as well as user related issues. So far, the assessment of lighting energy consumption of LCS has been based on technical features rather than the occupants' acceptance.

This article presents the results of a monitoring study providing some recommendations based on the human and technical aspects of LCS in small scale applications.

Four identical peripheral office rooms located in Lund, Sweden, were equipped with four different LCS: manual switch at the door, presence detector, daylight dimming with absence detector and LED task lamp.

Each occupant performed ordinary office tasks for two weeks in each room in April-May 2013. A subjective evaluation concerning the general lighting experience and the appreciation of the LCS was carried out.

The results indicate that the manual switch was greatly appreciated and it accomplished good energy performances (75% savings compared to the presence detector). The daylight-linked LCS achieved only slightly higher savings (79%), due to relatively high parasitic losses, but did not guarantee an optimal light environment. The desk lamp achieved 97% savings, but the lighting conditions were considered

unacceptable by the office workers. In general, the participants in this study perceived all automatic controls as stressful. (C) 2014 The Authors. Published by Elsevier Ltd.

C1 [Gentile, Niko; Dubois, Marie-Claude] Lund Univ, Inst Architecture & Built Environm, Div Energy & Bldg Design, POB 118, SE-22100 Lund, Sweden.

[Laike, Thorbjorn] Lund Univ, Inst Architecture & Built Environm, Div Environm Psychol, SE-22100 Lund, Sweden.

RP Gentile, N (reprint author), Lund Univ, Inst Architecture & Built Environm, Div Energy & Bldg Design, POB 118, SE-22100 Lund, Sweden.

EM niko.gentile@ebd.lth.se

OI Gentile, Niko/0000-0001-5721-6644

CR Atif MR, 2003, ENER G BUILDINGS, V35, P441, DOI 10.1016/S0378-7788(02)00142-1

Baker N., 2000, ARCH CIT ENV P PLEA, P553

Bordass W., 1994, CHART I BUILD C BUIL

Boyce P., 2003, BENEFITS DAYLIGHT WI

Braun M, 2009, LECT NOTES COMPUT SC, V5624, P223, DOI 10.1007/978-3-642-02731-4\_26

Brekke B., 1995, P RIGHT LIGHT, V3, P875

Brox J., 2010, BRILLIANT EVOLUTION

Doulos L, 2007, ELE COM ENG, P69

Dubois MC, 2013, LIGHTING RES TECHNOL, V45, P52, DOI 10.1177/1477153511428918

Dubois MC, 2011, ENER G BUILDINGS, V43, P2572, DOI 10.1016/j.enbuild.2011.07.001

Ellis E.V, 2013, VISIBILITY RES, P465

Per-Anders Enkvist T.N., 2007, GLOBAL STUDY SIZE CO

Escuyer S., 2001, Lighting Research and Technology, V33, P77, DOI 10.1177/136578280103300202

Floyd D.B., 1995, FIELD COMMISSIONING

Galasiu A., 2004, LIGHTING ART SCI INT, V24, P23

Galasiu AD, 2006, ENER G BUILDINGS, V38, P728, DOI 10.1016/j.enbuild.2006.03.001

Gentile N, IE ECB 122012 FRANKF

Halonen L, 1995, PROCEEDINGS OF THE 23RD SESSION OF THE CIE, VOL 1, P200

HAYWARD DG, 1982, ENVIRON BEHAV, V14, P634, DOI 10.1177/0013916582145015

Hobday R., 2007, LIGHT REVOLUTION HLT

JENKINS PL, 1992, ATMOS ENVIRON A-GEN, V26, P2141, DOI 10.1016/0960-1686(92)90402-7

Logadottir A, 2013, PROCEEDINGS OF THE CIE CENTENARY CONFERENCE TOWARDS A NEW CENTURY OF LIGHT, P159

Love J. A., 1998, LIGHTING RES TECHNOL, V30, P45, DOI DOI 10.1177/096032719803000107

Wayne Morrow B.R., WORLD WORKPLACE1998

Opdal K., 1995, P RIGHT LIGHT

Pauley SM, 2004, MED HYPOTHESES, V63, P588, DOI 10.1016/j.mehy.2004.03.020

Pigg S., 1996, ACEEE 1996 SUMM STUD

Robson C., 2011, REAL WORLD RES RESOU

Slater A., P CIBSE NAT C EASTB, P1995

NR 29

TC 4

Z9 4

U1 0

U2 2

PU ELSEVIER SCIENCE BV

PI AMSTERDAM

PA SARA BURGERHARTSTRAAT 25, PO BOX 211, 1000 AE AMSTERDAM, NETHERLANDS

SN 1876-6102

J9 ENRGY PROCED

PY 2014

VL 57

BP 1987

EP +

DI 10.1016/j.egypro.2014.10.063

PG 3

WC Energy & Fuels

SC Energy & Fuels

GA BB9FL

UT WOS:000348253202012

OA gold

DA 2018-05-03

ER

PT S

AU Hu, HF

Huang, YH

Milenkovic, M

Miller, C

Hanebutte, U

AF Hu, Huaafen

Huang, Yonghong

Milenkovic, Milan

Miller, Chad

Hanebutte, Ulf

GP IEEE

TI Personalized Sensing towards Building Energy Efficiency and Thermal Comfort

SO PROCEEDINGS OF THE 2014 INTERNATIONAL JOINT CONFERENCE ON NEURAL NETWORKS (IJCNN)

SE IEEE International Joint Conference on Neural Networks (IJCNN)

LA English

DT Proceedings Paper

CT International Joint Conference on Neural Networks (IJCNN)

CY JUL 06-11, 2014

CL Beijing, PEOPLES R CHINA

SP IEEE

DE building energy efficiency; sensor-enhanced IT; personal energy feedback; personal sensing architecture; data analytics; occupancy profile

AB The emergence of Information Technology (IT) based sensing has received increasing attention and acceptance in buildings due to its noninvasive nature and its ability in delivering real-time and potentially highly personalized feedback to building energy and comfort management. This study presents results of a pilot deployment experiment on such an IT-based sensing system - Personal Office Energy Monitor (POEM) developed by Intel Labs.

The pilot study shows that with appropriate analytic methods the POEM sensor data could be transferred into valuable inputs to building management system (BMS). This study applies building science principle based models as the first step to calculate intermediate building performance indices based on raw measurement data. The intermediate performance indices are then further analyzed in order to reveal potential means to improve a building's operational energy efficiency and occupant comfort. Results demonstrate that POEM sensor data could lead to energy saving opportunities through localized comfort management, plug load sensing and scheduling, and occupancy based building control. As an IT platform-integrated and occupant centered sensing system, POEM provides a convenient, low-cost, and efficient sensing solution to the next generation of smart buildings, featured by its ability in assisting BMS to improve operational building energy efficiency without compromising occupants' thermal comfort and indoor environmental quality.

C1 [Hu, Huaafen; Miller, Chad] Portland State Univ, Dept Mech Engr, Portland, OR 97201 USA.

[Huang, Yonghong] Intel Labs, Graph Analyt Operat Div, Hillsboro, OR 97124 USA.

[Milenkovic, Milan] Intel Labs, Hillsboro, OR 97124 USA.

RP Hu, HF (reprint author), Portland State Univ, Dept Mech Engr, Portland, OR 97201 USA.

EM hhu@pdx.edu; milan@intel.com; catherine.huang@intel.com;

ulf.r.hanebutte@intel.com

CR ASHRAE, 2004, 552004 ASHRAE

ASHRAE, 2013, THERMAL COMFORT

Attar R., 2011, ASHRAE T, V117

Gomez-Otero C., 2012, INF SYST TECHN CISTI, P1

Hu H., 2014, P ASHRAE 2014 ANN C, P8  
 Hu HF, 2013, 2013 1ST IEEE CONFERENCE ON TECHNOLOGIES FOR SUSTAINABILITY (SUSTECH),  
 P49, DOI 10.1109/SusTech.2013.6617297  
 Krioukov Andrew, 2012, P 11 INT C INF PROC, P157  
 Martinez S., 2014, SWITCHBOARD ANN RESO  
 Metzger I., 2012, PLUG LOAD CONTROL BE  
 Milenkovic M., 2011, BUILDSYS 2011 3 ACM  
 Milenkovic M., 2013, CHI 13 HUM FACT COMP  
 Milenkovic M., 2013, P SENSORNETS 2013 BA  
 Murakami Y, 2007, BUILD ENVIRON, V42, P4022, DOI 10.1016/j.buildenv.2006.05.012  
 US Energy Information Administration, 2013, ANN EN OUTL 2014 EAR  
 Weng T., 2012, BUILDINGS SMART BUIL

NR 15  
 TC 4  
 Z9 4  
 U1 0  
 U2 2  
 PU IEEE  
 PI NEW YORK  
 PA 345 E 47TH ST, NEW YORK, NY 10017 USA  
 SN 2161-4393  
 BN 978-1-4799-1484-5  
 J9 IEEE IJCNN  
 PY 2014  
 BP 1963  
 EP 1969  
 PG 7

WC Computer Science, Artificial Intelligence; Engineering, Electrical &  
 Electronic; Telecommunications  
 SC Computer Science; Engineering; Telecommunications  
 GA BE4BF  
 UT WOS:000371465702009  
 DA 2018-05-03  
 ER

PT S  
 AU Cheng, Z  
     Shein, WW  
     Tan, YS  
     Lim, AO  
 AF Cheng, Zhuo  
     Shein, Wai Wai  
     Tan, Yasuo  
     Lim, Azman Osman

GP IEEE  
 TI Energy Efficient Thermal Comfort Control for Cyber-Physical Home System  
 SO 2013 IEEE INTERNATIONAL CONFERENCE ON SMART GRID COMMUNICATIONS  
 (SMARTGRIDCOMM)  
 SE International Conference on Smart Grid Communications  
 LA English  
 DT Proceedings Paper  
 CT IEEE International Conference on Smart Grid Communications  
 (SmartGridComm)  
 CY OCT 21-24, 2013  
 CL Vancouver, CANADA  
 SP IEEE, IEEE Commun Soc

AB Technology advances allow us to design smart home system for the purpose to achieve high demands on  
 occupants' comfort. In this research, we focus on the thermal comfort control (TCC) system to build an



energy efficient thermal comfort control (EETCC) algorithm, which is based on the cyber-physical systems (CPS) approach. By optimizing the actuators; air-conditioner, window and curtain, our proposed algorithm can acquire the desired comfort level with high energy efficiency. Through the raw data from experiments, we evaluate and verify our proposed algorithm in the cyber-physical home system environment by using MATLAB/Simulink software.

C1 [Cheng, Zhuo; Shein, Wai Wai; Tan, Yasuo; Lim, Azman Osman] Japan Adv Inst Sci & Technol, Sch Informat Sci, Nomi, Ishikawa 9231292, Japan.

RP Cheng, Z (reprint author), Japan Adv Inst Sci & Technol, Sch Informat Sci, 1-1 Asahidai, Nomi, Ishikawa 9231292, Japan.

EM chengzhuo@jaist.ac.jp; waiwaishein@jaist.ac.jp; ytan@jaist.ac.jp;  
aolim@jaist.ac.jp

CR [Anonymous], 2010, 552010 ASHRAE

[Anonymous], 2005, 7730 BS EN ISO

Fanger P. O., 1972, THERMAL COMFORT ANAL

Lai CF, 2011, COMPUT COMMUN, V34, P184, DOI 10.1016/j.comcom.2010.03.034

Lee E. A., 2010, ACM IEEE DES AUT C D, P737

Lee EA, 2008, ISORC 2008: 11TH IEEE SYMPOSIUM ON OBJECT/COMPONENT/SERVICE-ORIENTED REAL-TIME DISTRIBUTED COMPUTING - PROCEEDINGS, P363, DOI 10.1109/ISORC.2008.25

Molinerio D., 2011, IND APPL SOC ANN M I, P1

Oliveria G.D., 2011, INT FED AUT CONTR IF, P9579

Rajhans A., 2009, ELECT COMMUNICATIONS, V21

Schumann A., 2011, IND ENG OTH APPL APP, P480

Shein Wai Wai, 2012, INT T SYSTEMS SCI AP, V8, P149

Vazquez FI, 2012, ADV INTEL SOFT COMPU, V153, P109

Wan JF, 2011, KSII T INTERNET INF, V5, P1891, DOI 10.3837/tiis.2011.11.001

Wan K., 2010, ENG LETT, V18, P308

Wang S., 2010, INT S SUST HLTH BUIL, P215

Xia F, 2011, WIRELESS NETWORKING BASED CONTROL, P85, DOI 10.1007/978-1-4419-7393-1\_4

NR 16

TC 4

Z9 4

U1 0

U2 0

PU IEEE

PI NEW YORK

PA 345 E 47TH ST, NEW YORK, NY 10017 USA

SN 2373-6836

BN 978-1-4799-1526-2

J9 INT CONF SMART GRID

PY 2013

BP 797

EP 802

PG 6

WC Computer Science, Hardware & Architecture; Computer Science, Theory & Methods; Engineering, Electrical & Electronic; Telecommunications

SC Computer Science; Engineering; Telecommunications

GA BJT39

UT WOS:000330174800134

DA 2018-05-03

ER

PT J

AU Pagliarini, G

Rainieri, S

AF Pagliarini, Giorgio

Rainieri, Sara

TI Restoration of the building hourly space heating and cooling loads from the monthly energy consumption

SO ENERGY AND BUILDINGS

LA English

DT Article

DE Hourly heating and cooling loads; Integrated multi-energy systems in buildings; BCHP; Building energy modelling; Multivariate regression inverse modelling

ID COMMERCIAL BUILDINGS; SELECTION; GENERATION; REGRESSION; SAVINGS; DEMAND; MODEL

AB The assessment of integrated multi-energy systems in buildings may require the knowledge of the energy use for building space heating and cooling with a temporal precision of at least 1 h. To assist the overall system optimisation, a parameter estimation procedure, which allows to restore the hourly space heating and cooling loads from the monthly energy consumption is here presented. The innovative aspect of the suggested approach lies in the possibility offered by a steady-state inverse modelling procedure to restore the short term heating and cooling loads of a building by using as input aggregated energy consumption data and the short term behaviour of the climatic variables. The effectiveness of the procedure, based on a non-linear multivariate regression approach, has been assessed with synthetic data calculated by means of the TRNSYS 16 software. Climatic data from MeteorNorm assisted the simulations for four European locations. Wall construction, glazing portion, internal both sensible and latent heat gain, air change rate, time scheduling of plant operation have been considered. The hourly space heating or cooling loads were restored with a coefficient of determination included between 0.74 and 0.96. The satisfactory results obtained suggest that the estimation procedure can be extended to restore the hourly energy use for space heating and cooling from the utility bills of existing buildings. (c) 2012 Elsevier B.V. All rights reserved.

C1 [Pagliarini, Giorgio; Rainieri, Sara] Univ Parma, Dept Ind Engr, I-43124 Parma, Italy.

RP Rainieri, S (reprint author), Univ Parma, Dept Ind Engr, Parco Area Sci 181-A, I-43124 Parma, Italy.

EM sara.rainieri@unipr.it

OI Pagliarini, Giorgio/0000-0002-8246-089X; Rainieri, Sara/0000-0002-5529-2894

CR Abushakra I.B., 1999, P REN ADV EN SYST 21

[Anonymous], 2001, ASHRAE HDB FUND

Beck J. V., 1977, PARAMETER ESTIMATION

DRAPER NR, 1998, APPL REGRESSION ANAL

Fabrizio E, 2009, ENERGBUILDINGS, V41, P1037, DOI 10.1016/j.enbuild.2009.05.005

FELS MF, 1986, ENERGBUILDINGS, V9, P1, DOI 10.1016/0378-7788(86)90002-2

Haberl JS, 1996, ASHRAE TRAN, V102, P419

Katipamula S, 1998, J SOL ENERGT ASME, V120, P177, DOI 10.1115/1.2888067

Kissock JK, 2002, DEV TOOLKIT CALCULAT

Klein S.A., 2000, TRNSYS TRANSIENT SYS

Kreider JF, 1994, ASHRAE T 2, V100, P1104

Maor I, 2009, ASHRAE TRAN, V115, P271

[Anonymous], METEONORM GLOB MET D

Ortiga J, 2011, ENERGBUILDINGS, V52, P1934, DOI 10.1016/j.enconman.2010.11.022

Pagliarini G, 2010, APPL THERM ENG, V30, P1255, DOI 10.1016/j.applthermaleng.2010.02.008

RABL A, 1988, ASME, V110, P52

Reddy TA, 2011, APPLIED DATA ANALYSIS AND MODELING FOR ENERGY ENGINEERS AND SCIENTISTS, P1, DOI 10.1007/978-1-4419-9613-8

Reddy TA, 1999, J SOL ENERGT ASME, V121, P40, DOI 10.1115/1.2888141

REDDY TA, 1994, ENERGBUILDINGS, V21, P35, DOI 10.1016/0378-7788(94)90014-0

Reddy TA, 1997, ASHRAE T, V103, P336

RUCH D, 1992, J SOL ENERGT ASME, V114, P77, DOI 10.1115/1.2929993

RUCH D, 1993, J SOL ENERGT ASME, V115, P77, DOI 10.1115/1.2930035

SEEM JE, 1991, ASHRAE TRAN, V97, P710

NR 23

TC 4

Z9 5

U1 1

U2 16

PU ELSEVIER SCIENCE SA

PI LAUSANNE

PA PO BOX 564, 1001 LAUSANNE, SWITZERLAND  
 SN 0378-7788  
 J9 ENERGBUILDINGS  
 JI Energy Build.  
 PD JUN  
 PY 2012  
 VL 49  
 BP 348  
 EP 355  
 DI 10.1016/j.enbuild.2012.02.030  
 PG 8  
 WC Construction & Building Technology; Energy & Fuels; Engineering, Civil  
 SC Construction & Building Technology; Energy & Fuels; Engineering  
 GA 966ZI  
 UT WOS:000305875500039  
 DA 2018-05-03  
 ER

PT J  
 AU Hester, N

Li, K  
 Schramski, JR  
 Crittenden, J

AF Hester, Nathan

Li, Ke  
 Schramski, John R.  
 Crittenden, John

TI Dynamic modeling of potentially conflicting energy reduction strategies  
 for residential structures in semi-arid climates

SO JOURNAL OF ENVIRONMENTAL MANAGEMENT

LA English

DT Article

DE Energy-saving measures; Structural insulated panels; Energy performance  
 modeling; Sustainable residential design

ID CONSUMPTION; BUILDINGS; SECTOR

AB Globally, residential energy consumption continues to rise due to a variety of trends such as increasing access to modern appliances, overall population growth, and the overall increase of electricity distribution. Currently, residential energy consumption accounts for approximately one-fifth of total U.S. energy consumption. This research analyzes the effectiveness of a range of energy-saving measures for residential houses in semi-arid climates. These energy-saving measures include: structural insulated panels (SIP) for exterior wall construction, daylight control, increased window area, efficient window glass suitable for the local weather, and several combinations of these. Our model determined that energy consumption is reduced by up to 6.1% when multiple energy savings technologies are combined. In addition, pre-construction technologies (structural insulated panels (SIPS), daylight control, and increased window area) provide roughly 4 times the energy savings when compared to post-construction technologies (window blinds and efficient window glass). The model also illuminated the importance variations in local climate and building configuration; highlighting the site-specific nature of this type of energy consumption quantification for policy and building code considerations. Published by Elsevier Ltd.

C1 [Hester, Nathan; Li, Ke] Univ Georgia, Fac Engr, MS Environm Engr, Athens, GA 30602 USA.

[Crittenden, John] Univ Georgia, Sch Civil & Environm Engr, Athens, GA 30602 USA.

RP Li, K (reprint author), Univ Georgia, Fac Engr, MS Environm Engr, Athens, GA 30602 USA.

EM keli@enr.uga.edu

RI Li, Ke/P-7154-2014

OI Li, Ke/0000-0001-8117-8596

FU RESIN through NSF [0836046]

FX This work was funded by the RESIN project through NSF award: 0836046.

Any opinions, findings, conclusions, or recommendations expressed in this paper are those of the authors and do not necessarily reflect the

view of the supporting organization. The authors gratefully acknowledge the editorial assistance of Karin Park.

CR Al-Ajmi FF, 2008, ENER BUILDINGS, V40, P1101, DOI 10.1016/j.enbuild.2007.10.010  
 Allison I., 2011, COPENHAGEN DIAGNOSIS  
 Blanchard S., 1998, LIFE CYCLE ANAL RESI  
 EIA, 2009, US PRIM EN FLOW SOUR  
 EIA, 2006, PER CAP TOT CARB DIO  
 Emery AF, 2006, ENERGY, V31, P677, DOI 10.1016/j.energy.2005.04.006  
 Ghisi E, 2007, ENER POLICY, V35, P4107, DOI 10.1016/j.enpol.2007.02.020  
 Kawasaki T, 2006, J WOOD SCI, V52, P75, DOI 10.1007/s10086-005-0720-0  
 Keoleian G A, 2000, J IND ECOL, V4, P135, DOI DOI 10.1162/108819800569726  
 Lam JC, 2008, ENER CONVERS MANAGE, V49, P2354, DOI 10.1016/j.enconman.2008.01.013  
 Meinshausen M., 2007, CLIMATE CHANGE HUMAN  
 Newell RG, 2006, ENER ECON, V28, P563, DOI 10.1016/j.eneco.2006.07.004  
 Opschoor JB, 2008, DEV CHANGE, V39, P1193, DOI 10.1111/j.1467-7660.2008.00515.x  
 Poirazis H, 2008, ENER BUILDINGS, V40, P1161, DOI 10.1016/j.enbuild.2007.10.011  
 Swan LG, 2009, RENEW SUST ENER REV, V13, P1819, DOI 10.1016/j.rser.2008.09.033  
 Takuma Y, 2006, ENER BUILDINGS, V38, P1349, DOI 10.1016/j.enbuild.2006.04.010  
 NR 16  
 TC 4  
 Z9 4  
 U1 1  
 U2 10  
 PU ACADEMIC PRESS LTD- ELSEVIER SCIENCE LTD  
 PI LONDON  
 PA 24-28 OVAL RD, LONDON NW1 7DX, ENGLAND  
 SN 0301-4797  
 EI 1095-8630  
 J9 J ENVIRON MANAGE  
 JI J. Environ. Manage.  
 PD APR  
 PY 2012  
 VL 97  
 BP 148  
 EP 153  
 DI 10.1016/j.jenvman.2011.12.002  
 PG 6  
 WC Environmental Sciences  
 SC Environmental Sciences & Ecology  
 GA 913TL  
 UT WOS:000301900200019  
 PM 22281948  
 DA 2018-05-03  
 ER  
  
 PT J  
 AU Foley, HC  
 Freihaut, J  
 Hallacher, P  
 Knapp, C  
 AF Foley, Henry C.  
 Freihaut, James  
 Hallacher, Paul  
 Knapp, Christine  
 TI THE GREATER PHILADELPHIA INNOVATION CLUSTER FOR ENERGY-EFFICIENT  
 BUILDINGS: A NEW MODEL FOR PUBLIC-PRIVATE PARTNERSHIPS  
 SO RESEARCH-TECHNOLOGY MANAGEMENT  
 LA English

DT Article

DE Energy efficiency; Building retrofit technology; Private-public partnership; Business-university partnership

AB OVERVIEW: The Greater Philadelphia Innovation Cluster (GPIC) for Energy-Efficient Buildings is breaking new ground on how public-private research partnerships are conducted. A consortium of public, private, and academic institutions is working under the guidance of seven federal agencies to transform the fragmented building retrofit environment into a systems solution industry while boosting energy efficiency, creating jobs, and stimulating private investment. GPIC is unique in that it is researching not only cutting-edge technology and tools but also the policies, financial models, workforce training programs, and intellectual property agreements to support the technology. Both the technology and the accompanying frameworks will be demonstrated and deployed regionally and nationally

C1 [Foley, Henry C.] Penn State Univ, Grad Sch, University Pk, PA 16802 USA.

[Hallacher, Paul] Greater Philadelphia Innovat Cluster GPIC Energy, Management & Adm, Philadelphia, PA USA.

[Hallacher, Paul] Penn State Univ, Off Vice President Res, University Pk, PA 16802 USA.

Greater Philadelphia Innovat Cluster GPIC Energy, Publ & Client Relat, Philadelphia, PA USA.

RP Foley, HC (reprint author), Penn State Univ, Grad Sch, University Pk, PA 16802 USA.

EM hcf2@psu.edu; jfreihaut@enr.psu.edu; pmh105@psu.edu; cmk31@psu.edu

FU Greater Philadelphia Innovation Cluster for Energy Efficient Buildings, an energy innovation hub; Department of Energy [DE-EE0004261]; agency of the United States Government

FX This material is based upon work supported by the Greater Philadelphia Innovation Cluster for Energy Efficient Buildings, an energy innovation hub sponsored by the Department of Energy under Award Number DE-EE0004261.; This report was prepared as an account of work sponsored by an agency of the United States Government. Neither the United States Government nor any agency thereof nor any of their employees, makes any warranty, express or implied, or assumes any legal liability or responsibility for the accuracy, completeness, or usefulness of any information, apparatus, product, or process disclosed, or represents that its use would not infringe privately owned rights. Reference herein to any specific commercial product, process, or service by trade name, trademark, manufacturer; or otherwise does not necessarily constitute or imply its endorsement, recommendation, or favoring by the United States Government or any agency thereof The views and opinions of authors expressed herein do not necessarily state or reflect those of the United States Government or any agency thereof

CR \*AM EN INN COUNC, 2011, BUS PLAN AM EN FUT

Duderstadt J, 2009, ENERGY DISCOVERY INN, P9

HALLACHER PM, 2005, POLICY ISSUE NETWORK

The Pennsylvania State University, 2010, LEV U RES IND COMP G

\*US DOE, 2012, WHAT HUBS

NR 5

TC 4

Z9 4

U1 1

U2 18

PU INDUSTRIAL RESEARCH INST, INC

PI ARLINGTON

PA 2200 CLARENDON BLVD, STE 1102, ARLINGTON, VA 22201 USA

SN 0895-6308

J9 RES TECHNOL MANAGE

JI Res.-Technol. Manage.

PD NOV-DEC

PY 2011

VL 54

IS 6

BP 42

EP 48  
 DI 10.5437/08956308X5406014  
 PG 7  
 WC Business; Engineering, Industrial; Management  
 SC Business & Economics; Engineering  
 GA 841BO  
 UT WOS:000296487500010  
 DA 2018-05-03  
 ER

PT J  
 AU Berl, A  
 Race, N  
 Ishmael, J  
 de Meer, H

AF Berl, Andreas  
 Race, Nicholas  
 Ishmael, Johnathan  
 de Meer, Hermann

TI Network virtualization in energy-efficient office environments

SO COMPUTER NETWORKS

LA English

DT Article

DE Energy efficiency; Office environment; Virtualization; Peer-to-peer;  
 Power management; Resource sharing

ID FUTURE HOME ENVIRONMENTS

AB The rising costs of energy and world-wide desire to reduce CO<sub>2</sub> emissions has led to an increased concern over the energy efficiency of information and communication technology. Whilst much of this concern has focused on data centres, office environments (and the computing equipment that they contain) have also been identified as a significant consumer of energy. Office environments offer great potential for energy savings, given that computing equipment often remains powered for 24 h per day, and for a large part of this period is underutilised or idle. This paper proposes an energy-efficient office management approach based on resource virtualization, power management, and resource sharing. Evaluations indicate that about 75% energy savings are achievable in office environments without a significant interruption of provided services. A core element of this office management is a peer-to-peer network that interconnects office hosts, achieves addressing and mediation, and manages energy efficiency within the office environment. Several peer-to-peer approaches are suggested and discussed in this paper. Two of the approaches are evaluated, based on a discrete-event simulation. (C) 2010 Elsevier B.V. All rights reserved.

C1 [Berl, Andreas; de Meer, Hermann] Univ Passau, Passau, Germany.

[Race, Nicholas; Ishmael, Johnathan] Univ Lancaster, Lancaster, England.

RP Berl, A (reprint author), Univ Passau, Innstr 43, Passau, Germany.

EM berl@uni-passau.de; n.race@lancaster.ac.uk; j.ishmael@lancaster.ac.uk;  
 demeer@uni-passau.de

OI Race, Nicholas/0000-0002-6870-8078

FU German Federal Government BMBF; European Community [216366, 216217]

FX The research leading to these results has received funding from the German Federal Government BMBF in the context of the G-Lab\_Ener-G project and from the European Community's FP7 framework programme in the context of the EuroNF Network of Excellence (grant agreement No. 216366) and the P2P-Next project (grant agreement No. 216217).

CR ATKINSON R, 2008, MOBIARCH 08, P7

Barham P., 2003, SIGOPS OPER SYST REV, V37, P164, DOI DOI 10.1145/1165389.945462

Bellard F, 2005, USENIX Association Proceedings of the FREENIX/Open Source Track, P41

Berl Andreas, 2009, COMPUT J, P1, DOI DOI 10.1093/COMJNI/BXP080

BERL A, 2010, P INT C EN EFF COMP

BERL A, 2009, P 1 INT C EM NETW IN, P117, DOI DOI 10.1109/EMERGING.2009.13

Berl A, 2009, LECT NOTES COMPUT SC, V5841, P177, DOI 10.1007/978-3-642-04989-7\_14

Berl A, 2009, IEEE COMMUN MAG, V47, P62, DOI 10.1109/MCOM.2009.5350370

BERTOLDI P, ELECT CONSUMPTION EF  
 CARTLEDGE C, SHEFFIELD ICT FOOTPR  
 Clark C, 2005, USENIX ASSOCIATION PROCEEDINGS OF THE 2ND SYMPOSIUM ON NETWORKED  
 SYSTEMS DESIGN & IMPLEMENTATION (NSDI '05), P273  
 Falkner J, 2007, IMC'07: PROCEEDINGS OF THE 2007 ACM SIGCOMM INTERNET MEASUREMENT  
 CONFERENCE, P129  
 Gupta I., 2003, P 2 INT WORKSH PEER  
 Hewitt C, 2008, IEEE INTERNET COMPUT, V12, P96, DOI 10.1109/MIC.2008.107  
 \*HEWL PACK MICR PH, ADV CONF POW INT SPE  
 Hlavacs H, 2008, ANN TELECOMMUN, V63, P473, DOI 10.1007/s12243-008-0045-2  
 \*INT, 2004, 30057701 INT  
 Koomey Jonathan G., 2007, ESTIMATING TOTAL POW  
 Satyanarayanan M, 2007, IEEE INTERNET COMPUT, V11, P16, DOI 10.1109/MIC.2007.46  
 Steinmetz R., 2005, LECT NOTES COMPUTER  
 Stoica I, 2001, SIGCOMM 01, P149, DOI DOI 10.1145/383059.383071  
 \*US EPA, SIGCOMM COMP COMM RE  
 Vaquero LM, 2009, ACM SIGCOMM COMP COM, V39, P50, DOI 10.1145/1496091.1496100  
 Webber CA, 2006, ENERGY, V31, P2823, DOI 10.1016/j.energy.2005.11.007  
 Yang B, 2003, PROC INT CONF DATA, P49, DOI 10.1109/ICDE.2003.1260781

NR 25

TC 4

Z9 4

U1 0

U2 3

PU ELSEVIER SCIENCE BV

PI AMSTERDAM

PA PO BOX 211, 1000 AE AMSTERDAM, NETHERLANDS

SN 1389-1286

EI 1872-7069

J9 COMPUT NETW

JI Comput. Netw.

PD NOV 15

PY 2010

VL 54

IS 16

SI SI

BP 2856

EP 2868

DI 10.1016/j.comnet.2010.07.019

PG 13

WC Computer Science, Hardware & Architecture; Computer Science, Information

Systems; Engineering, Electrical & Electronic; Telecommunications

SC Computer Science; Engineering; Telecommunications

GA 681FX

UT WOS:000284297900005

DA 2018-05-03

ER

PT J

AU Ben-David, T

Rackes, A

Waring, MS

AF Ben-David, Tom

Rackes, Adams

Waring, Michael S.

TI Alternative ventilation strategies in US offices: Saving energy while  
 enhancing work performance, reducing absenteeism, and considering  
 outdoor pollutant exposure tradeoffs

## SO BUILDING AND ENVIRONMENT

LA English

DT Article

DE Indoor air quality (IAQ); Healthy buildings; Energy efficiency;

Multi-criteria decision-making; Building energy simulation; Economizer controls

ID INDOOR AIR-QUALITY; DEMAND-CONTROLLED VENTILATION; BUILDING SYNDROME SYMPTOMS; LONG-TERM EXPOSURE; RESIDENTIAL BUILDINGS; SCIENTIFIC LITERATURE; COMMERCIAL BUILDINGS; PARTICULATE MATTER; SEQUENCE GENERATOR; CO2 CONCENTRATIONS

AB Mechanical ventilation can improve occupant productivity, use or save energy, and increase outdoor-to-indoor pollutant transport. This work explores those impacts for eight ventilation strategies, relative to a baseline constant mechanical ventilation rate (VR) of 9.4 L/s/occ, in two representative offices. Strategies were unique combinations of airside economizing, demand-controlled ventilation, and supply air temperature reset, along with doubling the baseline VR. These were evaluated within a Monte Carlo analysis that varied climate and outdoor pollution, along with 19 building parameters. Energy modeling, empirical correlations, and indoor air quality (IAQ) modeling were used to quantify outcomes of: (i) energy use; (ii) profitable IAQ impacts, e.g. work performance; and (iii) negative IAQ health impacts due to indoor particle and ozone exposure. 'Win-win' strategies were defined as those that saved energy and increased work performance, and these always included an economizer. Relative to the baseline, the win-win strategies: increased annual geometric mean VRs by 5-10 L/s/occ; reduced mechanical system energy consumption by 12-27% (saving \$1-1.75/m(2)/year); increased work performance by 0.5%; eliminated 5 h of absenteeism per year; and increased indoor PM2.5 by 0.5  $\mu$ g/m(3) and ozone by 3 ppb. A sensitivity analysis identified infiltration and climate as the largest outcome drivers. Median annual benefits for small-to-medium-large offices in the U.S. (similar to 75% of office floorspace) were \$28 billion for implementing the win-win strategy with the greatest energy savings, and \$55 billion for implementing the win-win strategy with the greatest work performance increase. Particle exposure tradeoffs were mitigated by use of efficient filters. (C) 2017 Elsevier Ltd. All rights reserved.

C1 [Ben-David, Tom; Rakes, Adams; Waring, Michael S.] Drexel Univ, Civil Architectural & Environm Engr, 3141 Chestnut St, Philadelphia, PA 19104 USA.

RP Ben-David, T (reprint author), Drexel Univ, Civil Architectural & Environm Engr, 3141 Chestnut St, Philadelphia, PA 19104 USA.

EM tb493@drexel.edu

OI Rakes, Adams/0000-0001-9532-4347

FU U.S. National Science Foundation (NSF) [1511151]; U.S. NSF Graduate Research Fellowship [1002809]

FX This work was supported by the U.S. National Science Foundation (NSF) under Grant No. 1511151 and the U.S. NSF Graduate Research Fellowship under Grant No. 1002809.

CR Allen J. G., 2015, ENV HLTH PERSPECT

Andersson K, 1997, INDOOR AIR, V7, P78, DOI 10.1111/j.1600-0668.1997.t01-2-00002.x

Apte MG, 2000, INDOOR AIR, V10, P246, DOI 10.1034/j.1600-0668.2000.010004246.x

ASHRAE, 2011, STAND METH TEST EV B

ASHRAE, 2013, VENT ACC IND AIR QUA

American Society of Heating and Refrigerating Engineers (ASHRAE), 2001, VENT ACC IND AIR QUA

ASHRAE, 2013, ASHRAE HDB FUND

Azimi P, 2014, ATMOS ENVIRON, V98, P337, DOI 10.1016/j.atmosenv.2014.09.007

Bako-Biro Z., 2007, VENTILATION RATES SC

Beko G, 2008, BUILD ENVIRON, V43, P1647, DOI 10.1016/j.buildenv.2007.10.006

Beko G, 2007, ATMOS ENVIRON, V41, P5202, DOI 10.1016/j.atmosenv.2006.07.063

Ben-David T, 2016, BUILD ENVIRON, V104, P320, DOI 10.1016/j.buildenv.2016.05.007

Brandemuehl M.J., 1999, ASHRAE T, V105

BRATLEY P, 1988, ACM T MATH SOFTWARE, V14, P88, DOI 10.1145/42288.214372

Burnett RT, 2014, ENVIRON HEALTH PERSP, V122, P397, DOI 10.1289/ehp.1307049

Burnett RT, 1999, ARCH ENVIRON HEALTH, V54, P130, DOI 10.1080/00039899909602248

Burnett RT, 1997, ENVIRON HEALTH PERSP, V105, P614, DOI 10.1289/ehp.97105614

Carrer P, 2015, BUILD ENVIRON, V94, P273, DOI 10.1016/j.buildenv.2015.08.011

Chan W. R., 2006, ASSESSING EFFECTIVEN



- Chan W.R., 2015, INDOOR AIR  
DOCKERY DW, 1992, ENVIRON RES, V59, P362, DOI 10.1016/S0013-9351(05)80042-8  
Dominici F, 2006, JAMA-J AM MED ASSOC, V295, P1127, DOI 10.1001/jama.295.10.1127  
Dutton SM, 2013, BUILD ENVIRON, V67, P34, DOI 10.1016/j.buildenv.2013.05.002  
Fann N, 2012, RISK ANAL, V32, P81, DOI 10.1111/j.1539-6924.2011.01630.x  
Fisk WJ, 2011, INDOOR AIR, V21, P357, DOI 10.1111/j.1600-0668.2011.00719.x  
Fisk WJ, 2009, INDOOR AIR, V19, P159, DOI 10.1111/j.1600-0668.2008.00575.x  
Fisk WJ, 2012, BUILD ENVIRON, V47, P368, DOI 10.1016/j.buildenv.2011.07.001  
Fisk WJ, 1998, ENERGBUILDINGS, V29, P35, DOI 10.1016/S0378-7788(98)00029-2  
Fisk W.J., 2004, EC BENEFITS EC SYSTE  
Girman J.R., 1982, ENVIRON INT, V8, P213, DOI DOI 10.1016/0160-4120(82)90030-7."  
Hamilton M, 2016, INDOOR AIR, V26, P318, DOI 10.1111/ina.12192  
Hanninen OO, 2005, INDOOR AIR, V15, P246, DOI 10.1111/j.1600-0668.2005.00365.x  
Haverinen-Shaughnessy U, 2011, INDOOR AIR, V21, P121, DOI 10.1111/j.1600-0668.2010.00686.x  
Homma T, 1996, RELIAB ENG SYST SAFE, V52, P1, DOI 10.1016/0951-8320(96)00002-6  
Jaenicke R., 1993, INT GEOPHYS, P1  
Joe S, 2003, ACM T MATH SOFTWARE, V29, P49, DOI 10.1145/641876.641879  
Johnson A.M., 2016, INDOOR AIR  
Joshi Sumedha M, 2008, Indian J Occup Environ Med, V12, P61, DOI 10.4103/0019-5278.43262  
Kosonen R, 2004, ENERGBUILDINGS, V36, P981, DOI 10.1016/j.enbuild.2004.06.005  
Kreider JF, 2009, HEATING COOLING BUIL  
Laden F, 2006, AM J RESP CRIT CARE, V173, P667, DOI 10.1164/rccm.200503-443OC  
Lawrence TM, 2007, ASHRAE TRAN, V113, P227  
Li Y, 2007, INDOOR AIR, V17, P2, DOI 10.1111/j.1600-0668.2006.00445.x  
Logue JM, 2012, ENVIRON HEALTH PERSP, V120, P216, DOI 10.1289/ehp.1104035  
MacNaughton P, 2015, INT J ENV RES PUB HE, V12, P14709, DOI 10.3390/ijerph121114709  
Maddalena R., 2014, INDOOR AIR  
The MathWorks Inc, CONSTR SOB QUAS POIN  
Mendell MJ, 2013, INDOOR AIR, V23, P515, DOI 10.1111/ina.12042  
Mendell MJ, 2015, BUILD ENVIRON, V92, P292, DOI 10.1016/j.buildenv.2015.05.002  
Miller KA, 2007, NEW ENGL J MED, V356, P447, DOI 10.1056/NEJMoa054409  
Milton DK, 2000, INDOOR AIR, V10, P212, DOI 10.1034/j.1600-0668.2000.010004212.x  
Montgomery JF, 2015, BUILD ENVIRON, V85, P17, DOI 10.1016/j.buildenv.2014.11.005  
Morrison G, 2011, ATMOS ENVIRON, V45, P2009, DOI 10.1016/j.atmosenv.2010.11.058  
Mozaffarian D, 2015, CIRCULATION, V131, pE29, DOI 10.1161/CIR.0000000000000152  
Myatt TA, 2004, AM J RESP CRIT CARE, V169, P1187, DOI 10.1164/rccm.200306-760OC  
Myatt Theodore A, 2002, Environ Health, V1, P3, DOI 10.1186/1476-069X-1-3  
Ng LC, 2012, BUILD ENVIRON, V58, P179, DOI 10.1016/j.buildenv.2012.07.008  
Persily A.K., 2008, ANAL VENTILATION DAT  
Persily A, 2015, BUILD ENVIRON, V91, P61, DOI 10.1016/j.buildenv.2015.02.026  
Pope CA, 2009, CIRCULATION, V120, P941, DOI 10.1161/CIRCULATIONAHA.109.857888  
Pope CA, 2002, JAMA-J AM MED ASSOC, V287, P1132, DOI 10.1001/jama.287.9.1132  
Rackes A, 2017, BUILD ENVIRON, V116, P30, DOI 10.1016/j.buildenv.2017.01.027  
Rackes A, 2016, APPL ENERGBUILDINGS, V174, P256, DOI 10.1016/j.apenergy.2016.04.081  
Rackes A, 2014, ENERGBUILDINGS, V75, P272, DOI 10.1016/j.enbuild.2014.02.024  
Rackes A, 2013, BUILD ENVIRON, V60, P243, DOI 10.1016/j.buildenv.2012.10.013  
Riley WJ, 2002, ENVIRON SCI TECHNOL, V36, P200, DOI 10.1021/es010723y  
Saltelli A., 2008, GLOBAL SENSITIVITY A  
Satish U, 2012, ENVIRON HEALTH PERSP, V120, P1671, DOI 10.1289/ehp.1104789  
Seppanen O, 2006, INDOOR AIR, V16, P28, DOI 10.1111/j.1600-0668.2005.00394.x  
Smith RL, 2009, INHAL TOXICOL, V21, P37, DOI 10.1080/08958370903161612  
Stephens B, 2012, ENVIRON SCI TECHNOL, V46, P929, DOI 10.1021/es2028795  
Stroupe KT, 2006, CIRCULATION, V114, P1251, DOI 10.1161/CIRCULATIONAHA.105.570838  
Sundell J, 2011, INDOOR AIR, V21, P191, DOI 10.1111/j.1600-0668.2010.00703.x  
Quang TN, 2013, ATMOS ENVIRON, V79, P41, DOI 10.1016/j.atmosenv.2013.06.009  
U.S. CDC, 2010, NUMB ALL LIST PROC D  
U.S. CDC, 2016, DEATHS FIN DAT 201 S  
U.S. DOE, 2015, GUID DET CLIM REG CO, V7.3

U.S. DOL, 2015, NAT OCC EMPL WAG EST  
U.S. Energy Information Administration (EIA), 2006, COMM BUILD EN CONS S  
U.S. EIA, 2015, COMM BUILD EN CONS S  
US EIA, 2012, COMM BUILD EN CONS S  
U. S. Energy Information Administration, 2003, COMM BUILD EN CONS S  
U.S. EPA, 2007, COST ILL HDB  
Wang GJ, 2014, J STROKE CEREBROVASC, V23, P861, DOI 10.1016/j.jstrokecerebrovasdis.2013.07.017  
Wargocki P, 2004, INDOOR AIR, V14, P7, DOI 10.1111/j.1600-0668.2004.00304.x  
WESCHLER CJ, 1989, JAPCA J AIR WASTE MA, V39, P1562, DOI 10.1080/08940630.1989.10466650  
Weschler CJ, 2000, INDOOR AIR, V10, P269, DOI 10.1034/j.1600-0668.2000.010004269.x  
Wolkoff P, 2006, INDOOR AIR, V16, P7, DOI 10.1111/j.1600-0668.2005.00393.x  
Xu XH, 2009, APPL THERM ENG, V29, P91, DOI 10.1016/j.applthermaleng.2008.02.017  
Yao Y, 2010, ENERG BUILDINGS, V42, P1220, DOI 10.1016/j.enbuild.2010.02.013  
Zanobetti A, 2008, AM J RESP CRIT CARE, V177, P184, DOI 10.1164/rccm.200706-823OC  
Zhang XJ, 2016, BUILD ENVIRON, V100, P162, DOI 10.1016/j.buildenv.2016.02.014  
Zhao H., 2016, INDOOR AIR

NR 93  
TC 3  
Z9 3  
U1 5  
U2 18  
PU PERGAMON-ELSEVIER SCIENCE LTD  
PI OXFORD  
PA THE BOULEVARD, LANGFORD LANE, KIDLINGTON, OXFORD OX5 1GB, ENGLAND  
SN 0360-1323  
EI 1873-684X  
J9 BUILD ENVIRON  
JI Build. Environ.  
PD MAY  
PY 2017  
VL 116  
BP 140  
EP 157  
DI 10.1016/j.buildenv.2017.02.004  
PG 18  
WC Construction & Building Technology; Engineering, Environmental;  
Engineering, Civil  
SC Construction & Building Technology; Engineering  
GA EP7IT  
UT WOS:000397552200012  
DA 2018-05-03  
ER

PT J  
AU Fan, H  
MacGill, IF  
Sproul, AB  
AF Fan, H.  
MacGill, I. F.  
Sproul, A. B.

TI Statistical analysis of drivers of residential peak electricity demand  
SO ENERGY AND BUILDINGS  
LA English  
DT Article  
DE Peak demand; Residential; Electricity demand; Energy demand; Smart grid;  
Peak load; Influence; Factors  
ID ENERGY DEMAND; CONSUMPTION; MODEL; LOAD; CLIMATE; AUSTRALIA; PROFILES;  
SECTOR; IMPACT

AB Growth in peak electricity demand poses considerable challenges for utilities seeking to ensure secure, reliable yet affordable energy provision. A better understanding of the key drivers of residential peak electricity demand could assist in better managing peak demand growth through options including demand-side participation and energy efficiency programs. However, such analysis has often been constrained by the limited data available from standard household metering, as well as typically low direct engagement by utilities with households regarding their energy use. This paper presents a study analysing and modeling residential peak demand in the greater Sydney region using data from Australia's largest Smart Grid study to date. The dataset includes household level half hour consumption matched to surveyed information including housing type, demographics and appliance ownership. A range of statistical and modeling techniques are applied to determine key drivers for household demand at times of network peaks. The analysis and model quantify how different factors drive residential peak demand on hot summer days. Key drivers identified include air-conditioning ownership, the number of household occupants, swimming pool ownership, and clothes dryer usage. Finally, the model is used to investigate the potential aggregate network peak implications of changes in household demographics and appliance ownership. Crown Copyright (C) 2017 Published by Elsevier B.V. All rights reserved.

C1 [Fan, H.; Sproul, A. B.] Univ New South Wales, Sch Photovolta & Renewable Energy Engr, Sydney, NSW 2052, Australia.

[MacGill, I. F.] Univ New South Wales, Ctr Energy & Environm Markets, Sydney, NSW 2052, Australia.

[MacGill, I. F.] Univ New South Wales, Sch Elect Engr & Telecommun, Sydney, NSW 2052, Australia.

RP Sproul, AB (reprint author), Univ New South Wales, Sch Photovolta & Renewable Energy Engr, Sydney, NSW 2052, Australia.

EM a.sproul@unsw.edu.au

FU Australian Postgraduate Awards (APA); CRC for Low Carbon Living Ltd - Cooperative Research Centres program, an Australian Government initiative

FX This work is supported by Australian Postgraduate Awards (APA), and an additional scholarship funded by the CRC for Low Carbon Living Ltd supported by the Cooperative Research Centres program, an Australian Government initiative. Special thanks go to Ms Zoe Hungerford for her editing.

CR AEMC, 2012, POWER CHOICE REV GIV, P8

Ahmed S, 2005, TECHNOL FORECAST SOC, V72, P609, DOI 10.1016/j.techfore.2004.02.003

Altman DG, 1998, BRIT MED J, V317, P1309, DOI 10.1136/bmj.317.7168.1309

ARMSTRONG JS, 1977, J MARKETING RES, V14, P396, DOI 10.2307/3150783

Associates C. R., 2004, PEAK DEM ETSA UTIL S

Atsawathawichok P., 2014, 11 INT C ELECT ENG E

Ausgrid, 2013, SMART GRID SMART CIT

BARAKAT EH, 1989, IEE PROC-C, V136, P35, DOI 10.1049/ip-c.1989.0006

Bennett C., 2013, IEEE T ENCON SPRING TE

Bradford L. W. J., 2007, M V GUIDELINES MEASU

Buranakunaporn S, 2007, INT J ENERG RES, V31, P300, DOI 10.1002/er.1234

Buys L., 2015, PLOS ONE, V10

Chiou YS, 2011, ENERG BUILDINGS, V43, P3528, DOI 10.1016/j.enbuild.2011.09.020

Cole WJ, 2014, J PROCESS CONTR, V24, P1311, DOI 10.1016/j.jprocont.2014.04.014

Ding DP, 2007, WIT TRANS ECOL ENVIR, V105, P55, DOI 10.2495/ESUS070061

Doemland I., 2013, EFFECTS AIR CONDITIO

Fan C, 2014, APPL ENERG, V127, P1, DOI 10.1016/j.apenergy.2014.04.016

Fan H, 2015, ENERG BUILDINGS, V105, P9, DOI 10.1016/j.enbuild.2015.07.030

Fan S., 2009, FORECASTING LONG TER

Good N, 2015, APPL ENERG, V137, P193, DOI 10.1016/j.apenergy.2014.10.028

Haney A. B., 2010, DEMAND SIDE MANAGEME

Hoon Y. Ji, 2014, IEEE T SMART GRID, V5, P121

Huang YF, 2014, ENERGY, V76, P254, DOI 10.1016/j.energy.2014.07.093

Itteilg R. L., 2008, ENERG ENG, V105, P66

Itteilg R. L., 2008, WORLD EN ENG C WEEC

Kavousian A, 2013, ENERGY, V55, P184, DOI 10.1016/j.energy.2013.03.086

Kemp A., 2012, BENCHMARKING NEM WHO

Langham E., 2014, REPORT PREPARED I SU

Logenthiran T., 2012, IEEE T, V3  
 Maddala GS, 1997, J BUS ECON STAT, V15, P90, DOI 10.2307/1392078  
 McLoughlin F, 2013, ENERGY, V50, P120, DOI 10.1016/j.energy.2012.11.048  
 MohammadZadeh S., 2010, 40 INT C COMP IND EN  
 Mtembo V., 2014, P U POW ENG C  
 Muratori M, 2013, APPL ENERG, V107, P465, DOI 10.1016/j.apenergy.2013.02.057  
 Myors P., 2005, MULTI UNIT RESIDENTI  
 Neu O., 2013, HIGH RESOLUTION SPAC  
 Newsham GR, 2010, ENERG POLICY, V38, P3289, DOI 10.1016/j.enpol.2010.01.027  
 Paatero JV, 2006, INT J ENERG RES, V30, P273, DOI 10.1002/er.1136  
 Parker DS, 2003, ENERG BUILDINGS, V35, P863, DOI 10.1016/S0378-7788(02)00244-X  
 Rallapalli SR, 2012, ENERG POLICY, V45, P516, DOI 10.1016/j.enpol.2012.02.064  
 Richardson I, 2010, ENERG BUILDINGS, V42, P1878, DOI 10.1016/j.enbuild.2010.05.023  
 Rod Sims J. C., 2010, RESIDENTIAL ENERGY W  
 Saddler H., 2013, POWER DOWN WHY IS EL  
 Sadineni SB, 2012, APPL ENERG, V92, P204, DOI 10.1016/j.apenergy.2011.10.026  
 Sailor DJ, 2001, ENERGY, V26, P645, DOI 10.1016/S0360-5442(01)00023-8  
 Salinas S, 2013, IEEE T SMART GRID, V4, P341, DOI 10.1109/TSG.2012.2214068  
 Samadi P, 2013, IEEE T SMART GRID, V4, P1007, DOI 10.1109/TSG.2012.2234769  
 Santamouris M, 2001, SOL ENERGY, V70, P201, DOI 10.1016/S0038-092X(00)00095-5  
 SCRGSP, 2013, STEER COMM REV GOVT, P18  
 Smith R, 2013, J MOD POWER SYST CLE, V1, P223, DOI 10.1007/s40565-013-0032-0  
 Smith R, 2013, ENERGY EFFICIENCY: TOWARDS THE END OF DEMAND GROWTH, P325, DOI 10.1016/B978-0-12-397879-0.00013-X  
 Stephenson J, 2010, ENERG POLICY, V38, P6120, DOI 10.1016/j.enpol.2010.05.069  
 Swan LG, 2009, RENEW SUST ENERG REV, V13, P1819, DOI 10.1016/j.rser.2008.09.033  
 Torriti J, 2012, ENERGY, V44, P576, DOI 10.1016/j.energy.2012.05.043  
 Tustin J., 2015, ELECT BILL BENCHMARK  
 van Benthem A, 2009, ENERG J, V30, P91  
 Wall J., 2014, INT J APPL INNOV ENG, V3  
 Widen J, 2009, ENERG BUILDINGS, V41, P753, DOI 10.1016/j.enbuild.2009.02.013  
 Wilkenfeld G., 2009, SWIMMING POOLS ENERG  
 Willmott CJ, 2005, CLIMATE RES, V30, P79, DOI 10.3354/cr030079  
 Wyatt P, 2013, ENERG POLICY, V60, P540, DOI 10.1016/j.enpol.2013.05.037  
 Young E., 2011, RATIONALE DRIVERS DS

NR 62

TC 3

Z9 3

U1 7

U2 9

PU ELSEVIER SCIENCE SA

PI LAUSANNE

PA PO BOX 564, 1001 LAUSANNE, SWITZERLAND

SN 0378-7788

EI 1872-6178

J9 ENERG BUILDINGS

JI Energy Build.

PD APR 15

PY 2017

VL 141

BP 205

EP 217

DI 10.1016/j.enbuild.2017.02.030

PG 13

WC Construction & Building Technology; Energy & Fuels; Engineering, Civil

SC Construction & Building Technology; Energy & Fuels; Engineering

GA ET3XG

UT WOS:000400212400017

DA 2018-05-03  
ER

PT J

AU Asensio, OI  
Delmas, MA

AF Asensio, Omar Isaac  
Delmas, Magali A.

TI The effectiveness of US energy efficiency building labels

SO NATURE ENERGY

LA English

DT Article

ID SIZED MANUFACTURING FIRMS; DEMAND-SIDE MANAGEMENT; CAUSAL INFERENCE;  
PROPENSITY SCORE; PROGRAM-EVALUATION; HOUSING-MARKET; CONSERVATION;  
ECONOMICS; BEHAVIOR; ADOPTION

AB Information programs are promising strategies to encourage investments in energy efficiency in commercial buildings. However, the realized effectiveness of these programs has not yet been estimated on a large scale. Here we take advantage of a large sample of monthly electricity consumption data for 178,777 commercial buildings in Los Angeles to analyse energy savings and emissions reductions from three major programs designed to encourage efficiency: the US Department of Energy's Better Buildings Challenge, the US Environmental Protection Agency's Energy Star program and the US Green Building Council's Leadership in Energy and Environmental Design (LEED) program. Using matching techniques, we find energy savings that range from 18% to 30%, depending on the program. These savings represent a reduction of 210 million kilowatt-hours or 145 kilotons of CO<sub>2</sub> equivalent emissions per year. However, we also find that these programs do not substantially reduce emissions in small and medium sized buildings, which represent about two-thirds of commercial sector building emissions.

C1 [Asensio, Omar Isaac] Georgia Inst Technol, Sch Publ Policy, 685 Cherry St NW, Atlanta, GA 30332 USA.  
[Asensio, Omar Isaac; Delmas, Magali A.] UCLA Inst Environm & Sustainabil, La Kretz Hall, Suite 300, Los Angeles, CA 90095 USA.

[Asensio, Omar Isaac] Anderson Sch Management, Ziman Ctr Real Estate, La Kretz Hall, Suite 300, Los Angeles, CA 90095 USA.

[Delmas, Magali A.] Anderson Sch Management, La Kretz Hall, Suite 300, Los Angeles, CA 90095 USA.

RP Delmas, MA (reprint author), UCLA Inst Environm & Sustainabil, La Kretz Hall, Suite 300, Los Angeles, CA 90095 USA.; Delmas, MA (reprint author), Anderson Sch Management, La Kretz Hall, Suite 300, Los Angeles, CA 90095 USA.

EM delmas@ucla.edu

RI Delmas, Magali/G-2268-2011

OI Delmas, Magali/0000-0003-3521-3543; Asensio, Omar  
Isaac/0000-0003-2143-5022

FU UCLA Rosalinde and Arthur Gilbert Program in Real Estate, Finance and Urban Economics; Easton Technology Leadership Program at the UCLA Anderson School of Management; University of California Center for Energy and Environmental Economics at Berkeley; UCLA Institute for Digital Research and Education (GORE) Postdoctoral Fellowship; Pritzker Distinguished Chair in Environment and Sustainability

FX This study would not be possible without S. Pincetl and her Energy Atlas team at the California Center for Sustainable Communities. For collaboration and access to program data, we thank D. Hodgins and J. Gould at the Los Angeles Better Buildings Challenge and B. Stapleton at the Los Angeles Cleantech Incubator. We also thank T. Vir Singh for high performance computing support on the Hoffman2 cluster. For helpful comments and suggestions, we thank H. Godwin, P. Kareiva, B. Lawrence, J. Lim, S. Neff, S. Muthulingam, S. Pincetl, D. Rajagopal J. Sekhon and M. Tikoff Vargas. This research was supported by funding from the UCLA Rosalinde and Arthur Gilbert Program in Real Estate, Finance and Urban Economics; the Easton Technology Leadership Program at the UCLA Anderson School of Management; the University of California Center for Energy and Environmental Economics at Berkeley; the UCLA Institute for Digital

- Research and Education GORE) Postdoctoral Fellowship, and the Pritzker Distinguished Chair in Environment and Sustainability.
- CR Abadie A, 2011, J BUS ECON STAT, V29, P1, DOI 10.1198/jbes.2009.07333
- Allcott H, 2012, J ECON PERSPECT, V26, P3, DOI 10.1257/jep.26.1.3
- Allcott H, 2010, SCIENCE, V327, P1204, DOI 10.1126/science.1180775
- Andam KS, 2008, P NATL ACAD SCI USA, V105, P16089, DOI 10.1073/pnas.0800437105
- Anderson ST, 2004, RESOUR ENERGY ECON, V26, P27, DOI 10.1016/j.reseneeco.2003.07.001
- Arimura TH, 2012, ENERG J, V33, P63, DOI 10.5547/01956574.33.2.4
- Asensio O., 2017, MATCHING CODE BUILDI
- Asensio OI, 2015, P NATL ACAD SCI USA, V112, pE510, DOI 10.1073/pnas.1401880112
- Asensio OI, 2016, J ECON BEHAV ORGAN, V126, P196, DOI 10.1016/j.jebo.2016.03.012
- Auffhammer M, 2008, ENERG J, V29, P91
- Blass V, 2014, ENERGY, V65, P560, DOI 10.1016/j.energy.2013.11.030
- Boomhower J, 2014, J PUBLIC ECON, V113, P67, DOI 10.1016/j.jpubeco.2014.03.009
- Brady HE, 2011, AM POLIT SCI REV, V105, P115, DOI 10.1017/S0003055410000596
- Caliendo M, 2008, J ECON SURV, V22, P31, DOI 10.1111/j.1467-6419.2007.00527.x
- Crawley DB, 2008, BUILD ENVIRON, V43, P661, DOI 10.1016/j.buildenv.2006.10.027
- DECANIO SJ, 1993, ENERG POLICY, V21, P906, DOI 10.1016/0301-4215(93)90178-I
- Delmas MA, 2015, LONG RANGE PLANN, V48, P80, DOI 10.1016/j.lrp.2013.08.014
- Delmas MA, 2013, ENERG POLICY, V61, P729, DOI 10.1016/j.enpol.2013.05.109
- Deng YH, 2012, REG SCI URBAN ECON, V42, P506, DOI 10.1016/j.regsciurbeco.2011.04.004
- Diamond A, 2013, REV ECON STAT, V95, P932, DOI 10.1162/REST\_a\_00318
- Dietz T, 2010, P NATL ACAD SCI USA, V107, P16007, DOI 10.1073/pnas.1010651107
- [Anonymous], 2016, BETT BUILD CHALL OV
- [Anonymous], 2014, LOS ANG REC LEAD EN
- [Anonymous], 2012, BETT BUILD 2012 PROG
- Eichholtz P, 2013, REV ECON STAT, V95, P50, DOI 10.1162/REST\_a\_00291
- Eichholtz P, 2010, AM ECON REV, V100, P2492, DOI 10.1257/aer.100.5.2492
- [Anonymous], 2015, EN STAR FACTS STATS
- Fuerst F, 2011, REAL ESTATE ECON, V39, P45, DOI 10.1111/j.1540-6229.2010.00286.x
- Gillingham K, 2009, ANNU REV RESOUR ECON, V1, P597, DOI 10.1146/annurev.resource.102308.124234
- Heckman JJ, 1996, P NATL ACAD SCI USA, V93, P13416, DOI 10.1073/pnas.93.23.13416
- Ho DE, 2007, POLIT ANAL, V15, P199, DOI 10.1093/pan/mpl013
- Imai K, 2008, J R STAT SOC A STAT, V171, P481, DOI 10.1111/j.1467-985X.2007.00527.x
- Imbens GW, 2009, J ECON LIT, V47, P5, DOI 10.1257/jel.47.1.5
- Intergovernmental Panel Climate Change Working Grp III, 2014, CLIMATE CHANGE 2014: MITIGATION OF CLIMATE CHANGE, P1
- Ito K, 2014, AM ECON REV, V104, P537, DOI 10.1257/aer.104.2.537
- JAFFE AB, 1994, ENERG POLICY, V22, P804, DOI 10.1016/0301-4215(94)90138-4
- Kahn ME, 2014, REG SCI URBAN ECON, V47, P25, DOI 10.1016/j.regsciurbeco.2013.07.001
- Kahn ME, 2014, J PUBLIC ECON, V113, P1, DOI 10.1016/j.jpubeco.2014.03.003
- Keane MP, 2010, J ECON PERSPECT, V24, P47, DOI 10.1257/jep.24.2.47
- Loughran DS, 2004, ENERGY J, V25, P19
- Mathew PA, 2015, APPL ENERG, V140, P85, DOI 10.1016/j.apenergy.2014.11.042
- Matisoff DC, 2016, REV ENV ECON POLICY, V10, P329, DOI 10.1093/reep/rew009
- Muthulingam S, 2013, M&SOM-MANUF SERV OP, V15, P596, DOI 10.1287/msom.2013.0439
- National Research Council, 2010, REAL PROSP EN EFF US
- Noah MA, 2011, JAMA-J AM MED ASSOC, V306, P1659, DOI 10.1001/jama.2011.1471
- Pincetl S., 2016, LOS ANGELES ENERGY A
- Pincetl S, 2016, J IND ECOL, V20, P166, DOI 10.1111/jiec.12299
- Potoski M, 2013, ANNU REV POLIT SCI, V16, P399, DOI 10.1146/annurev-polisci-032211-211224
- ROSENBAUM PR, 1983, BIOMETRIKA, V70, P41, DOI 10.2307/2335942
- Rosenbaum P. R., 2002, OBSERVATIONAL STUDIE
- Sekhon JS, 2011, J STAT SOFTW, V42, P1
- Sekhon JS, 2009, ANNU REV POLIT SCI, V12, P487, DOI 10.1146/annurev.polisci.11.060606.135444
- [Anonymous], 2009, DTI1240PA UNEP
- US Green Building Council (USGBC), 2015, GREEN BUILD FACTS

TC 3  
 Z9 3  
 U1 8  
 U2 13  
 PU NATURE PUBLISHING GROUP  
 PI LONDON  
 PA MACMILLAN BUILDING, 4 CRINAN ST, LONDON N1 9XW, ENGLAND  
 SN 2058-7546  
 J9 NAT ENERGY  
 JI Nat. Energy  
 PD APR  
 PY 2017  
 VL 2  
 IS 4  
 AR 17033  
 DI 10.1038/nenergy.2017.33  
 PG 8  
 WC Energy & Fuels; Materials Science, Multidisciplinary  
 SC Energy & Fuels; Materials Science  
 GA EW9HS  
 UT WOS:000402829300010  
 DA 2018-05-03  
 ER

PT J  
 AU Chen, CF  
 Xu, XJ  
 Day, JK  
 AF Chen, Chien-fei  
 Xu, Xiaojing  
 Day, Julia K.

TI Thermal comfort or money saving? Exploring intentions to conserve energy  
 among low-income households in the United States

SO ENERGY RESEARCH & SOCIAL SCIENCE

LA English

DT Article

DE Energy conservation; Theory of planned behavior; Thermal comfort;  
 Low-income households

ID ENVIRONMENTAL CONCERN; PLANNED BEHAVIOR; RESIDENTIAL BUILDINGS;  
 CLIMATE-CHANGE; HOT SUMMER; CHINA STATUS; GROUP NORMS; CONSUMPTION;  
 ATTITUDES; DETERMINANTS

AB Low-income households comprise an important, but often-neglected, target population for energy reduction in the U.S. residential sector. Previous research of this population tends to emphasize demographic and economic factors with little consideration of social-psychological variables. This paper utilized the theory of planned behavior (TPB) to investigate how demographics, climate zones, and a set of social-psychological variables, including energy concern, bill consciousness, frugality attitude, and thermal comfort (needs for coolness and warmness) influenced energy conservation intentions among 248 low-income households across the U.S. Results indicated that the three TPB variables alone (attitudes toward energy-conservation, subjective norms, and perceived behavioral control) had positive effects on energy conservation intentions. Attitudes toward energy-conservation and perceived behavioral control remained as the strongest predictors after accounting for other variables. Meanwhile, bill consciousness positively predicted energy conservation intentions, whereas needs for warmness and coolness negatively predicted intentions. Gender and climate zones predicted intentions when other variables were not included in the model. This study provides important insights on low-income households' energy-conservation intentions, as well as the antecedents and potential barriers, which provide useful recommendations for future energy policy initiatives. Published by Elsevier Ltd.

C1 [Chen, Chien-fei; Xu, Xiaojing] Univ Tennessee, Dept Elect Engrn & Comp Sci, NSF Ctr Ultrawide Area Resilient Elect Energy Tra, Knoxville, TN USA.

- [Day, Julia K.] Kansas State Univ, Coll Human Ecol & Energy Behav, Manhattan, KS 66506 USA.  
 RP Chen, CF (reprint author), Univ Tennessee, Dept Elect Engr & Comp Sci, CURENT Engr Res Ctr, 508 Min  
 H Kuo Bldg, 1520 Middle Dr, Knoxville, TN 37996 USA.  
 EM cchen26@utk.edu  
 FU Engineering Research Center Program of the National Science Foundation;  
 Department of Energy under NSF Award [EEC-1041877]; CURENT Industry  
 Partnership Program  
 FX This work was supported in part by the Engineering Research Center  
 Program of the National Science Foundation and the Department of Energy  
 under NSF Award Number EEC-1041877 and the CURENT Industry Partnership  
 Program.  
 CR Abrahamse W, 2011, HUM ECOL REV, V18, P30  
 Abrahamse W, 2009, J ECON PSYCHOL, V30, P711, DOI 10.1016/j.joep.2009.05.006  
 AJZEN I, 1977, PSYCHOL BULL, V84, P888, DOI 10.1037/0033-2909.84.5.888  
 AJZEN I, 1991, ORGAN BEHAV HUM DEC, V50, P179, DOI 10.1016/0749-5978(91)90020-T  
 AJZEN I, 1986, J EXP SOC PSYCHOL, V22, P453, DOI 10.1016/0022-1031(86)90045-4  
 American Electric Power, 2013, ISS EL AFF RIS EN CO  
 [Anonymous], 2013, 901 ASHRAE  
 Armitage CJ, 2001, BRIT J SOC PSYCHOL, V40, P471, DOI 10.1348/014466601164939  
 Arpan L. M., 2013, APPL ENV ED COMMUN, V12, P207  
 Babcock H., 2009, RESPONSINLE ENV BEHA  
 Bamberg S, 2003, J ENVIRON PSYCHOL, V23, P21, DOI 10.1016/S0272-4944(02)00078-6  
 Barr S, 2005, ENERG POLICY, V33, P1425, DOI 10.1016/j.enpol.2003.12.016  
 BECKER LJ, 1981, ENVIRON BEHAV, V13, P590, DOI 10.1177/0013916581135004  
 Berelson S., 2014, ACEEE SUMMER STUDY E  
 Bird S, 2012, ENERG POLICY, V48, P506, DOI 10.1016/j.enpol.2012.05.053  
 Blake J, 1999, INT J JUSTICE SUSTAI, V4, P257  
 Bolderdijk JW, 2013, NAT CLIM CHANGE, V3, P413, DOI [10.1038/nclimate1767,  
 10.1038/NCLIMATE1767]  
 Brounen D, 2012, EUR ECON REV, V56, P931, DOI 10.1016/j.eurocorev.2012.02.007  
 Buhmester M, 2011, PERSPECT PSYCHOL SCI, V6, P3, DOI 10.1177/1745691610393980  
 Carlsson Kanyama, 2005, INT J CONSUM STUD, V29, P239, DOI [10.1111/j.1470-6431.2005.00409.x, DOI  
 10.1111/J.1470-6431.2005.00409.X]  
 Cetin KS, 2014, ENERG BUILDINGS, V84, P716, DOI 10.1016/j.enbuild.2014.07.045  
 Chen CF, 2016, ENERGY RES SOC SCI, V15, P1, DOI 10.1016/j.erss.2016.02.006  
 Chen CF, 2014, ENERGY RES SOC SCI, V4, P23, DOI 10.1016/j.erss.2014.08.004  
 Chen SQ, 2010, ENERG BUILDINGS, V42, P136, DOI 10.1016/j.enbuild.2009.07.003  
 CIALDINI RB, 1990, J PERS SOC PSYCHOL, V58, P1015, DOI 10.1037/0022-3514.58.6.1015  
 Claudy M., 2008, EURO ASIAN J SUSTAIN, V1, P27  
 CORRALVERDUGO V, 2008, REV MEX PSICOL, V25, P313  
 Darby S, 2008, BUILD RES INF, V36, P499, DOI 10.1080/09613210802028428  
 Day J. K., 2014, OCCUPANT TRAINING HI  
 De Young R, 2000, J SOC ISSUES, V56, P509, DOI 10.1111/0022-4537.00181  
 Delmas M. A., 2013, WORKING PAPER  
 DeNavas-Walt C., 2015, INCOME POVERTY US CU  
 Dietz T, 2009, P NATL ACAD SCI USA, V106, P18452, DOI 10.1073/pnas.0908738106  
 Dillahunt T, 2009, UBICOMP'09: PROCEEDINGS OF THE 11TH ACM INTERNATIONAL CONFERENCE  
 ON UBIQUITOUS COMPUTING, P255  
 Ehrhardt-Martinez K., 2010, P ACEEE SUMM STUD EN  
 Energy Information Administration (EIA), 2011, ANN EN OUTL  
 Fishbein M., 1975, BELIEF ATTITUDE INTE  
 Fransson N, 1999, J ENVIRON PSYCHOL, V19, P369, DOI 10.1006/jevp.1999.0141  
 Frederiks ER, 2015, ENERGIES, V8, P573, DOI 10.3390/en8010573  
 Fujii S, 2006, J ENVIRON PSYCHOL, V26, P262, DOI 10.1016/j.jenvp.2006.09.003  
 Gatersleben B, 2002, ENVIRON BEHAV, V34, P335, DOI 10.1177/0013916502034003004  
 Gifford R, 2011, AM PSYCHOL, V66, P290, DOI 10.1037/a0023566  
 Goodman JK, 2013, J BEHAV DECIS MAKING, V26, P213, DOI 10.1002/bdm.1753  
 Guo SY, 2015, BUILD ENVIRON, V94, P532, DOI 10.1016/j.buildenv.2015.10.004



- Han H, 2010, TOURISM MANAGE, V31, P325, DOI 10.1016/j.tourman.2009.03.013
- Hansla A, 2008, J ENVIRON PSYCHOL, V28, P1, DOI 10.1016/j.jenvp.2007.08.004
- Holloway D., 2006, URBAN POLICY RES, V24, P115, DOI [10.1080/08111140600591096, DOI 10.1080/08111140600591096]
- Hu S, 2016, ENER POLICY, V92, P158, DOI 10.1016/j.enpol.2016.01.032
- Jaber JO, 2008, RENEW SUST ENER REV, V12, P278, DOI 10.1016/j.rser.2006.05.004
- Jackson T., 2008, STATE WORLD 2008 INN, P45
- Kaiser FG, 2005, J APPL SOC PSYCHOL, V35, P2150, DOI 10.1111/j.1559-1816.2005.tb02213.x
- Kaiser FG, 2003, J APPL SOC PSYCHOL, V33, P586, DOI 10.1111/j.1559-1816.2003.tb01914.x
- Karlin B., 2012, P ACEEE SUMM STUD EN
- Keating K. M., 1982, POLICY RELEVANT VARI
- Kranz J., 2012, AMCIS 2012 P BUILD E
- Langevin J, 2013, APPL ENER, V102, P1358, DOI 10.1016/j.apenergy.2012.07.003
- Laudenslager MS, 2004, PERCEPT MOTOR SKILL, V98, P1162, DOI 10.2466/PMS.98.4.1162-1170
- Li DHW, 2012, ENERGY, V42, P103, DOI 10.1016/j.energy.2012.03.044
- LICHTENSTEIN DR, 1993, J MARKETING RES, V30, P234, DOI 10.2307/3172830
- Lin BR, 2016, BUILD ENVIRON, V101, P9, DOI 10.1016/j.buildenv.2016.02.022
- Louis W, 2007, J SOC PSYCHOL, V147, P57, DOI 10.3200/SOCP.147.1.57-74
- Louis WR, 2005, GROUP PROCESS INTERG, V8, P355, DOI 10.1177/1368430205056465
- Murray AG, 2014, CONTEMP ECON POLICY, V32, P811, DOI 10.1111/coep.12050
- O'Dwyer C., 2013, ENGAGING ENROLLING L
- Oreg S, 2006, ENVIRON BEHAV, V38, P462, DOI 10.1177/0013916505286012
- Ozaki R., 2009, SOC PSYCHOL REV, V11, P3
- Ozaki R, 2011, BUS STRATEG ENVIRON, V20, P1, DOI 10.1002/bse.650
- Peeters L, 2009, APPL ENER, V86, P772, DOI 10.1016/j.apenergy.2008.07.011
- Pivo G, 2014, BUILD RES INF, V42, P551, DOI 10.1080/09613218.2014.905395
- Podgornik A., 2013, CLIMATE SMART TECHNO, P597
- Poortinga W, 2004, ENVIRON BEHAV, V36, P70, DOI 10.1177/0013916503251466
- SAMUELSON CD, 1991, J APPL SOC PSYCHOL, V21, P549, DOI 10.1111/j.1559-1816.1991.tb00536.x
- Schaffrin A, 2015, ENER POLICY, V77, P1, DOI 10.1016/j.enpol.2014.12.002
- SELIGMAN C, 1979, J APPL SOC PSYCHOL, V9, P70, DOI 10.1111/j.1559-1816.1979.tb00795.x
- Semenza JC, 2008, AM J PREV MED, V35, P479, DOI 10.1016/j.amepre.2008.08.020
- Sovacool BK, 2014, ENERGY RES SOC SCI, V1, P1, DOI 10.1016/j.erss.2014.02.003
- Sovacool BK, 2009, ENER POLICY, V37, P4500, DOI 10.1016/j.enpol.2009.05.073
- Stemmers K, 2009, BUILD RES INF, V37, P625, DOI 10.1080/09613210903186661
- Sutterlin B, 2011, ENER POLICY, V39, P8137, DOI 10.1016/j.enpol.2011.10.008
- Takacs-Santa A, 2007, HUM ECOL REV, V14, P26
- Tanabe S, 2013, ARCHIT SCI REV, V56, P4, DOI 10.1080/00038628.2012.744296
- Tapia-Fonllem C, 2013, SUSTAINABILITY-BASEL, V5, P711, DOI 10.3390/su5020711
- Urban J, 2012, ENER POLICY, V47, P69, DOI 10.1016/j.enpol.2012.04.018
- US Department of Energy, 2011, BUILD EN DAT BOOK
- Peart J, 2010, P ACAD MARKETING STU, V15, P68
- Wagner A, 2007, ENER BUILDINGS, V39, P758, DOI 10.1016/j.enbuild.2007.02.013
- Wang ZH, 2011, ENER POLICY, V39, P3550, DOI 10.1016/j.enpol.2011.03.055
- Wei S, 2014, ENER BUILDINGS, V70, P36, DOI 10.1016/j.enbuild.2013.11.001
- Westberg S., 2011, LOW INCOME ENERGY EF
- Whitmarsh L, 2010, J ENVIRON PSYCHOL, V30, P305, DOI 10.1016/j.jenvp.2010.01.003
- Wilhite H, 1999, ADV CONSUM RES, V26, P281
- Wilke HAM., 1991, EUROPEAN REV SOCIAL, V2, P165
- Wilson J, 2013, J IND ECOL, V17, P880, DOI 10.1111/jiec.12057
- Xu LY, 2013, ENER POLICY, V57, P253, DOI 10.1016/j.enpol.2013.01.048
- Yan HY, 2016, ENER BUILDINGS, V116, P133, DOI 10.1016/j.enbuild.2015.12.053
- [Anonymous], 2004, 55 ASHRAE

NR 96

TC 3

Z9 3

U1 7

U2 9

PU ELSEVIER SCIENCE BV  
PI AMSTERDAM  
PA PO BOX 211, 1000 AE AMSTERDAM, NETHERLANDS  
SN 2214-6296  
EI 2214-6326  
J9 ENERGY RES SOC SCI  
JI Energy Res. Soc. Sci.  
PD APR  
PY 2017  
VL 26  
BP 61  
EP 71  
DI 10.1016/j.erss.2017.01.009  
PG 11  
WC Environmental Studies  
SC Environmental Sciences & Ecology  
GA EP2GO  
UT WOS:000397201500008  
DA 2018-05-03  
ER

PT J

AU Obinna, U

Joore, P

Wauben, L

Reinders, A

AF Obinna, Uchechi

Joore, Peter

Wauben, Linda

Reinders, Angele

TI Comparison of two residential Smart Grid pilots in the Netherlands and in the USA, focusing on energy performance and user experiences

SO APPLIED ENERGY

LA English

DT Article

DE Electricity consumption; Electricity generation; End-users; Smart Grids; Residential applications

ID CONSUMPTION; CLIMATE; DEMAND

AB Two residential Smart Grid pilots, PowerMatching City, Groningen (NL) and Pecan Street, Austin Texas (USA) have been compared regarding their energy performance and the experiences of users in these pilots. The objective of the comparison was to gain new insights that could support the successful deployment of future residential Smart Grids.

Measured data on electricity generation and electricity consumption of households in 2013 and 2014 were evaluated. Existing reports with results of surveys of users were also analyzed.

The energy performance revealed that the average domestic electricity consumption of households in PowerMatching City was lower compared to Pecan Street (2.6 GW h versus 10.1 GW h). At the same time, households in Pecan Street generated a higher amount of electricity compared to PowerMatching City (6.8 GW h versus 1.14 GW h). Households in Pecan Street consumed on average, 8% less electricity with respect to the USA average household domestic electricity consumption of 10.9 GW h; while households in PowerMatching City consumed 19% less electricity compared to the Dutch average household domestic electricity consumption of 3.1 GW h.

Households in PowerMatching City appeared to have a higher potential to contribute to electricity demand and supply balancing, because their electricity consumption from the grid was largely reduced with increased self-generation.

User experiences revealed that end-users in both pilots preferred technologies that automatically shift their energy use, since this requires minimal effort from them.

We conclude that the pattern of households' electricity generation and consumption in Smart Grid pilot projects, and their contribution to peak load balancing in the electricity network is largely influenced by

existing Smart Grid set-ups, local climate and related needs for heating and cooling, the average capacity of installed energy generating technologies and the prevailing energy behavior. (C) 2017 The Authors. Published by Elsevier Ltd. This is an open access article under the CC BY license (<http://creativecommons.org/licenses/by/4.0/>).

- C1 [Obinna, Uchechi; Joore, Peter; Wauben, Linda; Reinders, Angele] Delft Univ Technol, Dept Ind Design Engn, Landbergstr 15, NL-2628 CE Delft, Netherlands.  
 [Obinna, Uchechi; Joore, Peter] NHL Univ Appl Sci, Res Grp Open Innovat, Rengerslaan 10, NL-8917 DD Leeuwarden, Netherlands.  
 [Wauben, Linda] Rotterdam Univ Appl Sci, Res Ctr Innovat Care, Rochussenstr 198, NL-3015 EK Rotterdam, Netherlands.  
 [Reinders, Angele] Univ Twente, Dept Design Prod & Management, Drienerloolaan 5, NL-7522 NB Enschede, Netherlands.

RP Obinna, U (reprint author), Delft Univ Technol, Dept Ind Design Engn, Landbergstr 15, NL-2628 CE Delft, Netherlands.

EM [u.p.obinna@tudelft.nl](mailto:u.p.obinna@tudelft.nl)

FU Province of Fryslan, the Netherlands

FX This work is part of the research program of University Campus Fryslan (UCF), which is financed by the Province of Fryslan, the Netherlands.

CR Biesiot W, 1999, *ECOL ECON*, V28, P367, DOI 10.1016/S0921-8009(98)00113-X

Bliek F., 2010, *INN SMART GRID TECHN*, P1

Centraal Bureau voor de Statistiek, STATL

Darby SJ, 2012, *ENERG POLICY*, V49, P759, DOI 10.1016/j.enpol.2012.07.026

de Meester T, 2013, *ENERG BUILDINGS*, V57, P313, DOI 10.1016/j.enbuild.2012.11.005

DNV KEMA, 2015, *INF LEAFL POW CIT*

European Environment Agency (EEA), 2013, 5 EEA

Entrop B, 2013, *THESIS*

Foxon TJ, 2013, *ENERG POLICY*, V52, P10, DOI 10.1016/j.enpol.2012.04.001

Geelen D, 2014, *THESIS*

Geelen D, 2013, *ENERG POLICY*, V61, P151, DOI 10.1016/j.enpol.2013.05.107

Giordano V, 2012, *ENERG POLICY*, V40, P252, DOI 10.1016/j.enpol.2011.09.066

Goulden M, 2014, *ENERGY RES SOC SCI*, V2, P21, DOI 10.1016/j.erss.2014.04.008

Gram-Hanssen K., 2011, *WORLD REN EN C SWED*

Grondzik W.T., 2010, *MECH ELECT EQUIPMENT*

Itard L., 2009, *ENERG BUILDINGS*, V41, P1223, DOI DOI 10.1016/J.ENBUILD.2009.07.002

Kobus CBA, 2015, *APPL ENER*, V147, P335, DOI 10.1016/j.apenergy.2015.01.073

Kobus CBA, 2013, *ERGONOMICS*, V56, P451, DOI 10.1080/00140139.2012.721522

Liao HC, 2002, *ENERG ECON*, V24, P267, DOI 10.1016/S0140-9883(02)00014-2

Obinna U, 2013, P 16 *EUR ROUNDT SUST*

Obinna U., 2016, *J SMART GRIDS RENEWA*, V7, P1

Pecan Street Organization, 2015, *FIN TECHN PERF REP*

Peffer T, 2011, *BUILD ENVIRON*, V46, P2529, DOI 10.1016/j.buildenv.2011.06.002

Powermatching City, 2014, *FIN REP WORK GROUP C*

Reinhardt A., 2012, P 2 *IFIP C SUST INT*, P1

Rhodes JD, 2014, *ENERGY*, V65, P462, DOI 10.1016/j.energy.2013.11.004

Sanquist TF, 2012, *ENERG POLICY*, V42, P354, DOI 10.1016/j.enpol.2011.11.092

van der Linden AC, 2006, *ENERG BUILDINGS*, V38, P8, DOI 10.1016/j.enbuild.2005.02.008

Van Dam SS, 2013, *THESIS*

Verbong GPJ, 2013, *ENERG POLICY*, V52, P117, DOI 10.1016/j.enpol.2012.05.003

Vringer CR, 2005, *THESIS*

Vringer K, 2007, *ENERG POLICY*, V35, P553, DOI 10.1016/j.enpol.2005.12.025

NR 32

TC 3

Z9 3

U1 1

U2 7

PU ELSEVIER SCI LTD

PI OXFORD

PA THE BOULEVARD, LANGFORD LANE, KIDLINGTON, OXFORD OX5 1GB, OXON, ENGLAND

SN 0306-2619  
EI 1872-9118  
J9 APPL ENERG  
JI Appl. Energy  
PD APR 1  
PY 2017  
VL 191  
BP 264  
EP 275  
DI 10.1016/j.apenergy.2017.01.086  
PG 12  
WC Energy & Fuels; Engineering, Chemical  
SC Energy & Fuels; Engineering  
GA EN4FN  
UT WOS:000395963500023  
OA gold  
DA 2018-05-03  
ER

PT J  
AU Zhou, KL  
    Yang, CH  
    Shen, JX  
AF Zhou, Kaile  
    Yang, Changhui  
    Shen, Jianxin

TI Discovering residential electricity consumption patterns through  
smart-meter data mining: A case study from China

SO UTILITIES POLICY

LA English

DT Article

DE Residential electricity consumption; Smart power use; Smart-meter data

ID CLUSTER VALIDITY INDEX; LOAD PROFILES; ENERGY-CONSUMPTION; GRID

ENVIRONMENT; BIG DATA; K-MEANS; FUZZY; RECOGNITION; ALGORITHMS; MODEL

AB With the increasing penetration of information and communication technologies (ICTs) in energy systems, traditional energy systems are being digitized. Advanced analysis of the energy production and consumption data and data-driven decision support can be combined to promote the formation and development of smart energy systems. Smart grids are a specific application of smart energy systems. Different electricity consumption patterns of residential users can be discovered and extracted by clustering analysis of the electricity consumption data collected by smart meters and other data acquisition terminals in a smart grid. This research explores daily electricity consumption patterns of low-voltage residential users in China. The service architecture of smart power use and the structure of electric energy data acquisition system of the State Grid Corporation of China (SGCC) are introduced and a process model for mining daily electricity consumption data is presented. The analysis is based on the fuzzy c-means (FCM) clustering method and a fuzzy cluster validity index (PBMF). A case study of Kunshan City, Jiangsu Province, China is presented, using the daily electricity consumption data of 1312 low-voltage users within a month. (C) 2017 Elsevier Ltd. All rights reserved.

C1 [Zhou, Kaile; Yang, Changhui] Hefei Univ Technol, Sch Management, Hefei 230009, Peoples R China.

[Zhou, Kaile] Hefei Univ Technol, Key Lab Proc Optimizat & Intelligent Decis Making, Minist Educ, Hefei 230009, Peoples R China.

[Shen, Jianxin] State Grid Corp China, Beijing 100031, Peoples R China.

RP Zhou, KL (reprint author), Hefei Univ Technol, Sch Management, Hefei 230009, Peoples R China.

EM zhoukaile@hfut.edu.cn

FU National Natural Science Foundation of China [71501056]; Fundamental Research Funds for the Central Universities [JZ2016HG728]; Anhui Provincial Natural Science Foundation Program [1608085QG165]; Anhui Provincial Philosophy and Social Science Planning Project [AHSKQ2015D42]; Foundation for Innovative Research Groups of the

National Natural Science Foundation of China [71521001]

- FX The authors would like to thank the editor, Prof. Janice A. Beecher, and the anonymous reviewers for their comments and suggestions, which have improved the quality of the paper significantly. This work is supported by the National Natural Science Foundation of China (71501056), the Fundamental Research Funds for the Central Universities (JZ2016HGTB0728), Anhui Provincial Natural Science Foundation Program (1608085QG165), Anhui Provincial Philosophy and Social Science Planning Project (AHSKQ2015D42), and the Foundation for Innovative Research Groups of the National Natural Science Foundation of China (No. 71521001).
- CR Bandyopadhyay S, 2005, FUZZY SET SYST, V152, P5, DOI 10.1016/j.fss.2004.10.011  
 Benitez I, 2014, INT J ELEC POWER, V55, P437, DOI 10.1016/j.ijepes.2013.09.022  
 Bennett C., 2008, EN 2030 C ENERGY 200, P1, DOI DOI 10.1109/ENERGY.2008.4781067  
 BEZDEK JC, 1984, COMPUT GEOSCI, V10, P191, DOI 10.1016/0098-3004(84)90020-7  
 Bolshakova N, 2003, SIGNAL PROCESS, V83, P825, DOI 10.1016/S0165-1684(02)00475-9  
 Bong CW, 2011, APPL SOFT COMPUT, V11, P3271, DOI 10.1016/j.asoc.2011.01.014  
 Chicco G, 2012, ENERGY, V42, P68, DOI 10.1016/j.energy.2011.12.031  
 Cios K.J., 1998, NEURAL NETWORKS IEEE, V9, P1533  
 de Carvalho FDT, 2007, PATTERN RECOGN LETT, V28, P423, DOI 10.1016/j.patrec.2006.08.014  
 Dunne T., 2012, BIG DATA ANAL ENERGY  
 Ferreira AMS, 2013, INT J ELEC POWER, V53, P824, DOI 10.1016/j.ijepes.2013.06.001  
 Figueiredo V, 2005, IEEE T POWER SYST, V20, P596, DOI 10.1109/TPWRS.2005.846234  
 Granell R, 2015, ENERGM CONVERS MANAGE, V92, P507, DOI 10.1016/j.enconman.2014.12.080  
 Hathaway RJ, 2001, IEEE T SYST MAN CY B, V31, P735, DOI 10.1109/3477.956035  
 Havens TC, 2012, IEEE T FUZZY SYST, V20, P1130, DOI 10.1109/TFUZZ.2012.2201485  
 He X, 2013, UTIL POLICY, V27, P108, DOI 10.1016/j.jup.2013.10.001  
 Jain AK, 1999, ACM COMPUT SURV, V31, P264, DOI 10.1145/331499.331504  
 Jain AK, 2010, PATTERN RECOGN LETT, V31, P651, DOI 10.1016/j.patrec.2009.09.011  
 Kunshan China, 2015, OV KUNSH  
 Kunshan Statistical Information Public Sites, 2011, 6 NAT CENS MAJ DAT B  
 Kwon SH, 1998, ELECTRON LETT, V34, P2176, DOI 10.1049/el:19981523  
 Liang-qun L, 2016, NOVEL QUADRATURE PAR  
 Luh GC, 2005, MATH COMPUT SIMULAT, V67, P515, DOI 10.1016/j.matcom.2004.07.004  
 Lund H, 2012, ENERGY, V42, P96, DOI 10.1016/j.energy.2012.04.003  
 Macedo MNQ, 2015, INT J ELEC POWER, V67, P216, DOI 10.1016/j.ijepes.2014.11.029  
 Marketing Department of State Grid Corporation of China (SGCC), 2009, RES REP SERV ARCH SM  
 McLoughlin F, 2015, APPL ENERGM, V141, P190, DOI 10.1016/j.apenergy.2014.12.039  
 Pakhira MK, 2004, PATTERN RECOGN, V37, P487, DOI 10.1016/j.patcog.2003.06.005  
 Panapakidis I, 2015, ENG APPL ARTIF INTEL, V38, P1, DOI 10.1016/j.engappai.2014.10.013  
 Panapakidis IP, 2014, ENERGM BUILDINGS, V73, P137, DOI 10.1016/j.enbuild.2014.01.002  
 Rahman MA, 2014, KNOWL-BASED SYST, V71, P345, DOI 10.1016/j.knosys.2014.08.011  
 Rasanen T, 2010, APPL ENERGM, V87, P3538, DOI 10.1016/j.apenergy.2010.05.015  
 Rezaee B, 2010, FUZZY SET SYST, V161, P3014, DOI 10.1016/j.fss.2010.07.005  
 Rhodes JD, 2014, APPL ENERGM, V135, P461, DOI 10.1016/j.apenergy.2014.08.111  
 Singh KK, 2014, IETE TECH REV, V31, P75, DOI 10.1080/02564602.2014.891375  
 Tsekouras GJ, 2008, ELECTR POW SYST RES, V78, P1494, DOI 10.1016/j.epsr.2008.01.010  
 Tsekouras GJ, 2007, IEEE T POWER SYST, V22, P1120, DOI 10.1109/TPWRS.2007.901287  
 Verdu SV, 2006, IEEE T POWER SYST, V21, P1672, DOI 10.1109/TPWRS.2006.881133  
 Wang WN, 2007, FUZZY SET SYST, V158, P2095, DOI 10.1016/j.fss.2007.03.004  
 WINDHAM MP, 1981, FUZZY SET SYST, V5, P177, DOI 10.1016/0165-0114(81)90015-4  
 XIE XLL, 1991, IEEE T PATTERN ANAL, V13, P841, DOI 10.1109/34.85677  
 Xinhua, 2013, AUT ACQ US EL INF WI  
 Xu R, 2005, IEEE T NEURAL NETWORK, V16, P645, DOI 10.1109/TNN.2005.845141  
 Zhang Boming, 2009, Automation of Electric Power Systems, V33, P21  
 Zhou KL, 2017, J CLEAN PROD, V141, P900, DOI 10.1016/j.jclepro.2016.09.165  
 Zhou KL, 2016, APPL ENERGM, V178, P212, DOI 10.1016/j.apenergy.2016.06.052  
 Zhou KL, 2016, KNOWL-BASED SYST, V96, P76, DOI 10.1016/j.knosys.2016.01.001

Zhou KL, 2016, RENEW SUST ENERG REV, V56, P810, DOI 10.1016/j.rser.2015.12.001

Zhou KL, 2016, RENEW SUST ENERG REV, V56, P215, DOI 10.1016/j.rser.2015.11.050

Zhou K, 2015, RENEW SUST ENERG REV, V47, P954, DOI 10.1016/j.rser.2015.03.036

Zhou KL, 2014, SCI CHINA INFORM SCI, V57, DOI 10.1007/s11432-014-5146-0

Zhou KL, 2014, RENEW SUST ENERG REV, V35, P304, DOI 10.1016/j.rser.2014.04.028

NR 52

TC 3

Z9 3

U1 7

U2 19

PU ELSEVIER SCI LTD

PI OXFORD

PA THE BOULEVARD, LANGFORD LANE, KIDLINGTON, OXFORD OX5 1GB, OXON, ENGLAND

SN 0957-1787

EI 1878-4356

J9 UTIL POLICY

JI Util. Policy

PD FEB

PY 2017

VL 44

BP 73

EP 84

DI 10.1016/j.jup.2017.01.004

PG 12

WC Energy & Fuels; Environmental Sciences; Environmental Studies

SC Energy & Fuels; Environmental Sciences & Ecology

GA EL2YE

UT WOS:000394485900007

DA 2018-05-03

ER

PT J

AU Craig, CA

Feng, S

AF Craig, Christopher A.

Feng, Song

TI Exploring utility organization electricity generation, residential

electricity consumption, and energy efficiency: A climatic approach

SO APPLIED ENERGY

LA English

DT Article

DE Electricity; Energy efficiency; Utility; Climate; Generation;

Efficiency; Climate change

ID SOUTHEAST UNITED-STATES; PLANNED BEHAVIOR; CO2 CAPTURE; TEMPERATURE;

PERCEPTIONS; EMISSIONS; DEMAND; MARKET; LOAD; IMPACTS

AB This study examined the impact of electricity generation by fuel source type and electricity consumption on carbon emissions to assess the role of climatic variability and energy efficiency (EE) in the United States. Despite high levels of greenhouse gas emissions, residential electricity consumption continues to increase in the United States and fossil fuels are the primary fuel source of electricity generation. 97.2% of the variability in carbon emissions in the electricity industry was explained by electricity generation from coal and residential electricity consumption. The relationships between residential electricity consumption, short-term climatic variability, long-term climatic trends, short-term reduction in electricity from EE programs, and long-term trends in EE programs was examined. This is the first study of its nature to examine these relationships across the 48 contiguous United States. Inter-year and long-term trends in cooling degree days, or days above a baseline temperature, were the primary climatic drivers of residential electricity consumption. Cooling degree days increased across the majority of the United States during the study period, and shared a positive relationship with residential electricity consumption when findings were significant. The majority of electricity reduction from EE programs was negatively related to

residential electricity consumption where findings were significant. However, the trend across the majority of states was a decrease in electricity reduction from EE while residential electricity consumption increased. States that successfully reduced consumption are discussed, in addition to the potential use of communication theory to design interventions aimed at improving EE program success. (C) 2016 Published by Elsevier Ltd.

C1 [Craig, Christopher A.] Montana State Univ, 202 McDonald Hall, 1500 Univ Dr, Billings, MT 59101 USA.

[Feng, Song] Univ Arkansas, Gearhart Dept Geosci 228, Fayetteville, AR 72701 USA.

RP Craig, CA (reprint author), Montana State Univ, 202 McDonald Hall, 1500 Univ Dr, Billings, MT 59101 USA.

EM christopheralancraig@email.uark.edu; songfeng@uark.edu

CR Abrahamse W, 2011, HUM ECOL REV, V18, P30

AJZEN I, 1991, ORGAN BEHAV HUM DEC, V50, P179, DOI 10.1016/0749-5978(91)90020-T

Allcott H, 2010, SCIENCE, V327, P1204, DOI 10.1126/science.1180775

Armitage CJ, 2001, BRIT J SOC PSYCHOL, V40, P471, DOI 10.1348/014466601164939

Asensio OI, 2015, PNAS

Bresler S, 2013, ENERGY EFFICIENCY: TOWARDS THE END OF DEMAND GROWTH, P419, DOI 10.1016/B978-0-12-397879-0.00016-5

Brosch T., 2014, FRONTIERS ENERGY RES, V2, P1, DOI [10.3389/fenrg.2014.00011, DOI 10.3389/FENRG.2014.00011]

Brouwer AS, 2015, APPL ENERG, V156, P107, DOI 10.1016/j.apenergy.2015.06.065

Chen MF, 2016, J CLEAN PROD, V112, P1746, DOI 10.1016/j.jclepro.2015.07.043

Craig CA, 2016, ENERGY, V116, P601, DOI 10.1016/j.energy.2016.10.013

Craig CA, 2016, APPL ENERG, V165, P660, DOI 10.1016/j.apenergy.2015.12.069

Craig CA, 2015, UTIL POLICY, V35, P41, DOI 10.1016/j.jup.2015.06.011

Craig CA, 2014, ENER POLICY, V66, P224, DOI 10.1016/j.enpol.2013.10.074

Delmas MA, 2013, ENER POLICY, V61, P729, DOI 10.1016/j.enpol.2013.05.109

Di Luzio M, 2008, J APPL METEOROL CLIM, V47, P475, DOI 10.1175/2007JAMC1356.1

Fischer C, 2008, J ENVIRON ECON MANAG, V55, P142, DOI 10.1016/j.jeem.2007.11.001

Giannakopoulos C, 2006, CLIMATE RES, V31, P97, DOI 10.3354/cr031097

Gilleo A., 2014, 2014 STATE ENERGY EF

Gillingham K, 2013, NATURE, V493, P475, DOI 10.1038/493475a

Greening LA, 2000, ENER POLICY, V28, P389

Hadley SW, 2006, GEOPHYS RES LETT, V33, DOI 10.1029/2006GL026652

Haeri H., 2012, PUBLIC UTILITIES FOR, P34

Hanak DP, 2015, APPL ENERG, V151, P258, DOI 10.1016/j.apenergy.2015.04.059

Hart M, 2004, ENER BUILDINGS, V36, P161, DOI 10.1016/j.enbuild.2003.10.009

Heede R, 2014, CLIMATIC CHANGE, V122, P229, DOI 10.1007/s10584-013-0986-y

Hertwich EG, 2015, P NATL ACAD SCI USA, V112, P6277, DOI 10.1073/pnas.1312753111

Ingram K, 2013, CLIMATE SE US VARIAB

IPCC, 2014, CLIMATE CHANGE 2014

Jovanovic S, 2015, ENERGY, V88, P604, DOI 10.1016/j.energy.2015.06.001

Karanfil F, 2015, ENER POLICY, V82, P264, DOI 10.1016/j.enpol.2014.12.001

Kopsakangas-Savolainen M, 2015, J CLEANER PROD, V2015

Labanca N, 2015, J CLEAN PROD, V109, P284, DOI 10.1016/j.jclepro.2015.02.077

Langevin J, 2013, APPL ENERG, V102, P1358, DOI 10.1016/j.apenergy.2012.07.003

Lynch D, 2013, EUR COUNC EN EFF EC, P2037

McFarland J, 2015, CLIMATIC CHANGE, V131, P111, DOI 10.1007/s10584-015-1380-8

Mideksa TK, 2010, ENER POLICY, V38, P3579, DOI 10.1016/j.enpol.2010.02.035

Mourshed M, 2012, ENER BUILDINGS, V54, P418, DOI 10.1016/j.enbuild.2012.07.024

National Oceanic and Atmospheric Administration (NOAA, 2015, BILL DOLL WEATH CLIM

Pardo A, 2002, ENER ECON, V24, P55, DOI 10.1016/S0140-9883(01)00082-2

Qadrdan M, 2015, APPL ENERG, V151, P1, DOI 10.1016/j.apenergy.2015.04.056

QUAYLE RG, 1980, J APPL METEOROL, V19, P241, DOI 10.1175/1520-0450(1980)019<0241:HDDDAT>2.0.CO;2

Ryu H, 2014, ENERGY, V64, P1071, DOI 10.1016/j.energy.2013.10.089

Sanna A, 2015, APPL ENERG, V156, P197, DOI 10.1016/j.apenergy.2015.07.008

Schill WP, 2015, APPL ENERG, V156, P185, DOI 10.1016/j.apenergy.2015.07.012

Schurr A, 2013, ENERGY EFFICIENCY: TOWARDS THE END OF DEMAND GROWTH, P111, DOI 10.1016/B978-0-12-397879-0.00004-9  
Shahiduzzaman M, 2015, APPL ENERG, V150, P25, DOI 10.1016/j.apenergy.2015.04.007  
Shen LY, 2011, HABITAT INT, V35, P17, DOI 10.1016/j.habitatint.2010.03.006  
Spence A, 2015, NAT CLIM CHANGE, V5, P550, DOI 10.1038/nclimate2610  
United States Energy Information Agency (EIA), 2015, INT EN STAT  
United States Energy Information Agency (EIA), 2009, RES EN CONS SURV REC  
United States Energy Information Agency (EIA), 2015, RET SAL EL STAT SECT  
United States Energy Information Agency (EIA), 2011, EM GREENH GAS US 200  
United States Energy Information Agency (EIA), 2015, FORM EIA 861 DET DAT  
United States Energy Information Agency (EIA), 2015, NET GEN STAT TYP PRO  
United States Energy Information Agency (EIA), 2015, US POW IND EST EM ST  
United States Energy Information Agency (EIA), 2015, SCHED 2015 CAP ADD M  
United States Energy Information Agency (EIA), 2016, ELECT POWER MONTHLY  
United States Environmental Protection Agency (EPA), 2014, HEAT COOL DEGR DAYS  
Valor E, 2001, J APPL METEOROL, V40, P1413, DOI 10.1175/1520-0450(2001)040<1413:DATAEL>2.0.CO;2  
Waechter S, 2015, J CLEAN PROD, V93, P193, DOI 10.1016/j.jclepro.2015.01.011  
Wang MG, 2015, APPL ENERG, V155, P526, DOI 10.1016/j.apenergy.2015.06.001  
Yi-Ling H., 2014, ADV CLIMATE CHANGE R, V5, P74

NR 62

TC 3

Z9 3

U1 11

U2 28

PU ELSEVIER SCI LTD

PI OXFORD

PA THE BOULEVARD, LANGFORD LANE, KIDLINGTON, OXFORD OX5 1GB, OXON, ENGLAND

SN 0306-2619

EI 1872-9118

J9 APPL ENERG

J1 Appl. Energy

PD JAN 1

PY 2017

VL 185

BP 779

EP 790

DI 10.1016/j.apenergy.2016.10.101

PN 1

PG 12

WC Energy & Fuels; Engineering, Chemical

SC Energy & Fuels; Engineering

GA EF7FD

UT WOS:000390494600064

DA 2018-05-03

ER

PT J

AU Poruschi, L

Ambrey, CL

AF Poruschi, Lavinia

Ambrey, Christopher L.

TI On the confluence of city living, energy saving behaviours and direct residential energy consumption

SO ENVIRONMENTAL SCIENCE & POLICY

LA English

DT Article

DE Australia; Cities; Direct energy consumption; Energy saving behaviours; Household Energy Consumption Survey; Pro-environmental behaviours



ID COMPACT CITIES; CONSERVATION; DETERMINANTS; EXPENDITURES; APPLIANCES; ATTITUDES; CLIMATE; POLICY; GROWTH

AB The purpose of this study is to shed light on the connection between income, dwelling type, tenure type and city living, in terms of both a household's energy saving behaviours and direct residential energy consumption. This study employs data from the Household Energy Consumption Survey, Australia. Using a seemingly unrelated regression (SUR) system of equations the results reveal some key mechanisms which may allow householders to realise lower levels of energy consumption and hence lower carbon emissions. The results indicate that there are characteristics unique to living in a city that are linked to higher levels of direct residential energy consumption. On a number of measures (e.g. household income, tenure type and dwelling type), the results point to a lower likelihood of engaging in energy saving behaviours in cities. Also, depending on the number of energy saving behaviours, these actions have the potential to more than offset higher direct residential energy consumption of householders residing in separate houses. Coupled with these findings renters, a more vulnerable social group, are found to be significantly disadvantaged, suffering from a much lower adaptive capacity. Specifically, householders who rent their home are 77% less likely to have solar electricity. A result which may reflect differences in access to opportunity. Further, householders who rent are less likely to engage in energy saving actions. A finding which may reflect difference in ontological security and the greater psychological burden associated with undertaking energy saving behaviours (a barrier) borne by renters not shared with home owners. (C) 2016 Elsevier Ltd. All rights reserved.

C1 [Poruschi, Lavinia] Griffith Univ, Cities Res Ctr, Sir Samuel Griffith Ctr N78 3 28, Nathan Campus,170 Kessels Rd, Brisbane, Qld 4111, Australia.

[Ambrey, Christopher L.] Griffith Univ, Cities Res Ctr, Arts & Educ 2 Bldg G31 3-14A,Gold Coast Campus, Gold Coast, Qld 4222, Australia.

RP Poruschi, L (reprint author), Griffith Univ, Cities Res Ctr, Sir Samuel Griffith Ctr N78 3 28, Nathan Campus,170 Kessels Rd, Brisbane, Qld 4111, Australia.

EM laviniaporuschi@gmail.com; c.ambrey@griffith.edu.au

RI Poruschi, Lavinia/M-5115-2017

OI Poruschi, Lavinia/0000-0002-5109-9202; Ambrey, Christopher/0000-0002-3790-7509

CR Abrahamse W, 2005, J ENVIRON PSYCHOL, V25, P273, DOI 10.1016/j.jenvp.2005.08.002

Ambrosius JD, 2015, LOCAL ENVIRON, V20, P836, DOI 10.1080/13549839.2014.926870

Australian Bureau of Statistics, 2013, 4671 0 HOUS EN CONS

Australian Bureau of Statistics, 2014, SYDN IS OUR DENS CIT

Barr S, 2005, ENERG POLICY, V33, P1425, DOI 10.1016/j.enpol.2003.12.016

Bettencourt LMA, 2007, P NATL ACAD SCI USA, V104, P7301, DOI 10.1073/pnas.0610172104

BLACK JS, 1985, J APPL PSYCHOL, V70, P3, DOI 10.1037//0021-9010.70.1.3

Burton E, 2000, URBAN STUD, V37, P1969, DOI 10.1080/00420980050162184

Cao K, 2015, ECON PAP, V34, P36, DOI 10.1111/1759-3441.12093

Capello R, 2000, URBAN STUD, V37, P1479, DOI 10.1080/00420980020080221

Cutter SL, 2003, SOC SCI QUART, V84, P242, DOI 10.1111/1540-6237.8402002

Davis LW, 2012, NBER CONF R, P301

DiPasquale D, 1999, J URBAN ECON, V45, P354, DOI 10.1006/juec.1998.2098

Druckman A, 2008, ENERG POLICY, V36, P3177, DOI 10.1016/j.enpol.2008.03.021

Fan S, 2011, ENERG POLICY, V39, P3709, DOI 10.1016/j.enpol.2011.03.080

Friedland AJ, 2003, ENVIRON SCI POLICY, V6, P175, DOI 10.1016/S1462-9011(03)00006-6

Gaigne C, 2012, J URBAN ECON, V72, P123, DOI 10.1016/j.jue.2012.04.001

Gatersleben B, 2002, ENVIRON BEHAV, V34, P335, DOI 10.1177/0013916502034003004

GILDERBLOOM JI, 1995, SOC FORCES, V73, P1589, DOI 10.2307/2580460

Glaeser E, 2012, TRIUMPH CITY OUR GRE

Gordon P, 1997, J AM PLANN ASSOC, V63, P95, DOI 10.1080/01944369708975727

Greening LA, 2000, ENERG POLICY, V28, P389

Heffron RJ, 2014, APPL ENERG, V123, P435, DOI 10.1016/j.apenergy.2013.12.034

Independent Pricing and Regulatory Tribunal, 2011, DET RES EN WAT CONS

Khan F, 2016, J CLEAN PROD, V123, P42, DOI 10.1016/j.jclepro.2015.06.128

Klein RJT, 2005, ENVIRON SCI POLICY, V8, P579, DOI 10.1016/j.envsci.2005.06.010

Kok MTJ, 2007, ENVIRON SCI POLICY, V10, P587, DOI 10.1016/j.envsci.2007.07.003

Koresawa A., 2001, NEW ROLE SPATIAL PLA, P11

LONG JE, 1993, ENERG ECON, V15, P232, DOI 10.1016/0140-9883(93)90012-G

McLoughlin F, 2012, ENER G BUILDINGS, V48, P240, DOI 10.1016/j.enbuild.2012.01.037  
 Neuman M, 2005, J PLAN EDUC RES, V25, P11, DOI 10.1177/0739456X04270466  
 O'Doherty J, 2008, APPL ENER G, V85, P650, DOI 10.1016/j.apenergy.2008.01.001  
 Owens S, 2008, ENER G POLICY, V36, P4412, DOI 10.1016/j.enpol.2008.09.031  
 Parkinson S, 2009, INT J HOUS POLICY, V9, P365, DOI 10.1080/14616710903357185  
 Poortinga W, 2003, J ECON PSYCHOL, V24, P49, DOI 10.1016/S0167-4870(02)00154-X  
 Poumanyvong P, 2010, ECOL ECON, V70, P434, DOI 10.1016/j.ecolecon.2010.09.029  
 Rehdanz K, 2007, ENER G ECON, V29, P167, DOI 10.1016/j.eneco.2006.04.002  
 Roodman D., 2009, 168 CTR GLOB DEV  
 Rosenzweig C., 2015, CLIMATE CHANGE CITIE  
 Sovacool BK, 2015, ENVIRON SCI POLICY, V54, P304, DOI 10.1016/j.envsci.2015.07.011  
 Steele W, 2012, INT PLAN STUD, V17, P67, DOI 10.1080/13563475.2011.638188  
 Steg L, 2009, J ENVIRON PSYCHOL, V29, P309, DOI 10.1016/j.jenvp.2008.10.004  
 Sutterlin B, 2011, ENER G POLICY, V39, P8137, DOI 10.1016/j.enpol.2011.10.008  
 Wiedenhofer D, 2013, ENER G POLICY, V63, P696, DOI 10.1016/j.enpol.2013.07.035  
 Wright K., 2010, ENV DES GUIDE, V65, P1442  
 ZELLNER A, 1962, J AM STAT ASSOC, V57, P348, DOI 10.2307/2281644

NR 46

TC 3

Z9 3

U1 5

U2 25

PU ELSEVIER SCI LTD

PI OXFORD

PA THE BOULEVARD, LANGFORD LANE, KIDLINGTON, OXFORD OX5 1GB, OXON, ENGLAND

SN 1462-9011

EI 1873-6416

J9 ENVIRON SCI POLICY

J1 Environ. Sci. Policy

PD DEC

PY 2016

VL 66

BP 334

EP 343

DI 10.1016/j.envsci.2016.07.003

PG 10

WC Environmental Sciences

SC Environmental Sciences & Ecology

GA ED7YT

UT WOS:000389089300036

DA 2018-05-03

ER

PT J

AU Trencher, G

Broto, VC

Takagi, T

Sprigings, Z

Nishida, Y

Yarime, M

AF Trencher, Gregory

Broto, Vanesa Castan

Takagi, Tomoko

Sprigings, Zoe

Nishida, Yuko

Yarime, Masaru

TI Innovative policy practices to advance building energy efficiency and retrofitting: Approaches, impacts and challenges in ten C40 cities

SO ENVIRONMENTAL SCIENCE & POLICY

LA English

DT Article

DE Building energy efficiency; Retrofitting; City climate governance;

Policy innovation; C40

ID CLIMATE POLICY; TRADE PROGRAM; PERSPECTIVE; DIFFUSION

AB This study examines ten programmes to advance energy efficiency and retrofitting of existing, private sector buildings in C40 cities in Asia-Pacific and USA. We set out to identify differing policy approaches, together with potential impacts and implementation challenges for each. Findings unearthed six policy models - both mandatory and voluntary - with unique impacts and challenges. We demonstrate that innovation occurs without new policy inventions and largely by necessity, as new features are added and generic models are adapted to local circumstances. Our sample demonstrated experimentation with benchmarking in the USA, comprehensive regulation in Asia, and voluntary approaches in Australia. Overall, environmental impacts are particularly slow to emerge and plagued with attribution challenges. We found limited evidence of benchmarking programme effectiveness in reducing energy consumption in the short-term, but some indication of mid-term outcomes. Driven by unique local circumstances, the cap-and-trade model stood out by fostering large, sustained and attributable GHG emission reductions and retrofitting. Market and social impacts are highly significant across all programmes, highlighting needs to consider non-environmental impacts in policy evaluation. We emphasise the complementary potential of voluntary and regulatory approaches to advancing energy efficiency and climate resilience. We also underscore the potential for reporting or benchmarking programmes to later transition to models mandating performance improvements, such as cap-and-trade. (C) 2016 Elsevier Ltd. All rights reserved.

C1 [Trencher, Gregory] Clark Univ, Dept Int Dev Community & Environm, Worcester, MA 01610 USA.

[Broto, Vanesa Castan] UCL, Fac Built Environm, London, England.

[Takagi, Tomoko] CSR Design Green Investment Advisory, Tokyo, Japan.

[Sprigings, Zoe] C40 Cities Climate Leadership Grp, London, England.

[Nishida, Yuko] Tokyo Metropolitan Govt Bur Environm, Tokyo, Japan.

[Yarime, Masaru] Univ Tokyo, Grad Sch Publ Policy, Tokyo, Japan.

[Yarime, Masaru] UCL, Dept Sci Technol Engn & Publ Policy, London, England.

RP Trencher, G (reprint author), Clark Univ, Dept Int Dev Community & Environm, Worcester, MA 01610 USA.

EM gtrencher@clarku.edu

OI Trencher, Gregory/0000-0001-8130-9146; Yarime,

Masaru/0000-0001-8048-7354

CR Acuto M., 2016, INT AFFAIRS IN PRESS, V92

Acuto M, 2016, RETROFITTING CITIES: PRIORITIES, GOVERNANCE AND EXPERIMENTATION, P107

Annunziata E, 2014, ENER POLICY, V69, P364, DOI 10.1016/j.enpol.2014.02.027

Auld G, 2014, GLOBAL ENVIRON CHANG, V29, P444, DOI 10.1016/j.gloenvcha.2014.03.002

Building and Construction Authority, 2015, BCA BUILD EN BENCHM

Biesenbender S, 2014, GLOBAL ENVIRON CHANG, V29, P424, DOI 10.1016/j.gloenvcha.2014.04.001

Broto VC, 2013, GLOBAL ENVIRON CHANG, V23, P92, DOI 10.1016/j.gloenvcha.2012.07.005

Brown L. R., 2015, GREAT TRANSITION SHI

Bulkeley H, 2015, URBAN POLITICS OF CLIMATE CHANGE: EXPERIMENTATION AND THE

GOVERNING OF SOCIO-TECHNICAL TRANSITIONS, P1

Bulkeley H, 2015, LOCAL ENVIRON, V20, P1405, DOI 10.1080/13549839.2015.1108715

Bulkeley H, 2010, ANNU REV ENV RESOUR, V35, P229, DOI 10.1146/annurev-environ-072809-101747

City of Melbourne, 2015, 1200 BUILD MELB RETR

City of New York, 2016, NEW YORK CIT EN WAT

City of Philadelphia, 2016, 2016 BUILD EN BENCHM

City of Philadelphia, 2016, 2015 BUILD EN BENCHM

City of San Francisco, 2015, SAN FRANC EX COMM BU

City of San Francisco, 2013, SAN FRANC CLIM ACT S

City of Seattle, 2014, SEATTL BUILD EN BENC

City of Sydney, 2013, REV IN COST SAV COMM

Dowling R, 2014, CITIES, V38, P18, DOI 10.1016/j.cities.2013.12.004

Geels FW, 2002, RES POLICY, V31, P1257, DOI 10.1016/S0048-7333(02)00062-8

Guy S., 2010, SHAPING URBAN INFRAS

Haug C, 2010, CLIMATIC CHANGE, V101, P427, DOI 10.1007/s10584-009-9682-3

Hilden M, 2014, ENVIRON POLIT, V23, P884, DOI 10.1080/09644016.2014.924205  
 Howlett M, 2014, GLOBAL ENVIRON CHANG, V29, P395, DOI 10.1016/j.gloenvcha.2013.12.009  
 Hsu D, 2014, BUILD RES INF, V42, P641, DOI 10.1080/09613218.2014.887612  
 IPCC Intergovernmental Panel on Climate Change, 2014, CLIM CHANG 2014 MIT  
 Jordan A, 2014, GLOBAL ENVIRON CHANG, V29, P387, DOI 10.1016/j.gloenvcha.2014.09.005  
 Jordan A, 2014, ENVIRON POLIT, V23, P715, DOI 10.1080/09644016.2014.923614  
 Matisoff DC, 2014, ENVIRON POLIT, V23, P795, DOI 10.1080/09644016.2014.923639  
 Nishida Y, 2016, BUILD RES INF, V44, P644, DOI 10.1080/09613218.2016.1169475  
 Nishida Y, 2011, BUILD RES INF, V39, P518, DOI 10.1080/09613218.2011.596419  
 Palmer K. L., 2015, 1509 RES FUT  
 Rudolph S, 2013, CRIT ISS ENVIR TAX, V13, P77  
 Schulz S., 2015, POWERING CLIMATE ACT  
 Serre C., 2015, EMISSIONS TRADING WO  
 Takagi T., 2014, URBAN EFFICIENCY SUR  
 Tokyo Metropolitan Government (TMG), 2015, TOK GREEN BUILD REP  
 Tokyo Metropolitan Government (TMG), 2016, TOK CAP AND TRAD PRO  
 United States Department of Energy (US DOE), 2015, NEW YORK CIT BENCHM  
 van der Heijden J, 2015, J ENVIRON POL PLAN, V17, P44, DOI 10.1080/1523908X.2014.886504  
 VanDerHeijden J, 2014, GOVERNANCE FOR URBAN SUSTAINABILITY AND RESILIENCE:  
 RESPONDING TO CLIMATE CHANGE AND THE RELEVANCE OF THE BUILT ENVIRONMENT, P1,  
 DOI 10.4337/9781782548133  
 \*WORLD BANK, 2010, CIT CLIM CHANG URG, DOI DOI 10.1596/978-0-8213-8653-8  
 Zhang D, 2014, ENERG POLICY, V75, P9, DOI 10.1016/j.enpol.2014.01.022

NR 44

TC 3

Z9 3

U1 7

U2 22

PU ELSEVIER SCI LTD

PI OXFORD

PA THE BOULEVARD, LANGFORD LANE, KIDLINGTON, OXFORD OX5 1GB, OXON, ENGLAND

SN 1462-9011

EI 1873-6416

J9 ENVIRON SCI POLICY

JI Environ. Sci. Policy

PD DEC

PY 2016

VL 66

BP 353

EP 365

DI 10.1016/j.envsci.2016.06.021

PG 13

WC Environmental Sciences

SC Environmental Sciences & Ecology

GA ED7YT

UT WOS:000389089300038

DA 2018-05-03

ER

PT J

AU Wang, T

Li, XD

Liao, PC

Fang, DP

AF Wang, Tao

Li, Xiaodong

Liao, Pin-Chao

Fang, Dongping

TI Building energy efficiency for public hospitals and healthcare facilities in China: Barriers and drivers

SO ENERGY

LA English

DT Article

DE Barriers and drivers; Energy efficiency; Hospitals; Healthcare facilities; China; Stakeholders

ID CONSERVATION; PERFORMANCE; CHALLENGES; POLICIES; SYSTEMS; SAVINGS; SECTOR; HVAC

AB Maximizing energy efficiency within HHFs (hospitals and healthcare facilities) is a major challenge in the field of energy conservation. This paper studies the key barriers to the implementation of energy efficient technologies in China's public HHFs. For this purpose, a preliminary survey was conducted at the Beijing Municipal Health Bureau in order to assess the energy conservation efforts being made at 20 public HHFs. In the survey, a list of specific barriers to energy efficiency was created and HHF staffs were asked to rank these barriers in the order of importance. The results show that the economic incentives, appropriate technology, as well as enforceable laws and regulations are insufficiently supported by the government, have become the most significant obstacles to the improvement of energy efficiency. To remedy this, policymakers should take a multipronged approach which addresses the hospitals, projects, and technical and operating procedures in order to encourage the full participation and support of all stakeholders involved. Specifically, the government should offer multilevel economic incentives and reward policies; establish practical mandatory targets for building energy efficiency; provide demonstrable best practices in terms of the project, techniques, and operating procedures; and promote awareness of the importance of property risk management. (C) 2016 Elsevier Ltd. All rights reserved.

C1 [Wang, Tao] Cent Univ Finance & Econ, Sch Management Sci & Engrn, 403 Tupei Bldg, 39 South Coll Rd, Beijing 100081, Peoples R China.

[Li, Xiaodong; Liao, Pin-Chao; Fang, Dongping] Tsinghua Univ, Dept Construct Management, 10 Bldg, Beijing 100084, Peoples R China.

RP Liao, PC (reprint author), Tsinghua Univ, Dept Construct Management, 10 Bldg, Beijing 100084, Peoples R China.

EM wangtao@163.com; eastdawn@tsinghua.edu.cn; pinchao@tsinghua.edu.cn; fangdp@tsinghua.edu.cn

FU Natural Science Foundation of China [71401191, 51378297]

FX We wish to acknowledge the Natural Science Foundation of China (Grant No. 71401191, No. 51378297) for their financial support of this research, and also the Fundamental Research Funds for the Central Universities.

CR Alexis GK, 2013, APPL THERM ENG, V54, P488, DOI 10.1016/j.applthermaleng.2013.02.019

Ascione F, 2013, ENER BUILDINGS, V60, P125, DOI 10.1016/j.enbuild.2013.01.021

Baek C, 2012, RENEW SUST ENER REV, V16, P3939, DOI 10.1016/j.rser.2012.03.046

Balaras CA, 2007, ENER BUILDINGS, V39, P454, DOI 10.1016/j.enbuild.2006.09.004

Beijing Government, 2012, BEIJ PLAN BUILD 5 RI

Bodach S, 2010, ENER POLICY, V38, P7898, DOI 10.1016/j.enpol.2010.09.009

Bond S, 2011, J PROP INVEST FINANC, V29, P494, DOI 10.1108/14635781111150367

Building Design+Construction, 2009, BUILDING DESIGN CONS

Buonomano A, 2014, ENERGY, V78, P555, DOI 10.1016/j.energy.2014.10.042

Carpenter D, 2011, HMF MAG JUL, P15

Chai KH, 2012, ENER POLICY, V46, P460, DOI 10.1016/j.enpol.2012.04.012

Dianshu F, 2010, ENER POLICY, V38, P1202, DOI 10.1016/j.enpol.2009.11.012

Dowson M, 2012, ENER POLICY, V50, P294, DOI 10.1016/j.enpol.2012.07.019

Fleiter T, 2011, RENEW SUST ENER REV, V15, P3099, DOI 10.1016/j.rser.2011.03.025

Fujita KS, 2011, MARKET BEHAV BARRIER

Jefferson J, 2006, ENERGY EFFICIENCY OP

Jiang P, 2013, J CLEAN PROD, V58, P112, DOI 10.1016/j.jclepro.2013.04.039

Urge-Vorsatz D., 2007, ASSESSMENT POLICY IN

Kolokotsa D, 2012, ADV BUILD ENERGY RES, V6, P159, DOI 10.1080/17512549.2012.672007

Kostka G, 2013, ENER POLICY, V52, P748, DOI 10.1016/j.enpol.2012.10.034

Li BZ, 2012, BUILD RES INF, V40, P417, DOI 10.1080/09613218.2012.682419

Liitzkendorf T, 2005, BUILD RES INF, V33, P212

Lo K, 2013, RENEW SUST ENERG REV, V18, P499, DOI 10.1016/j.rser.2012.10.042  
 Maiorano J, 2015, INT J SUST HIGHER ED, V16, P200, DOI 10.1108/IJSHE-07-2012-0062  
 Nilsson A, 2014, APPL ENERG, V122, P17, DOI 10.1016/j.apenergy.2014.01.060  
 Peterman A, 2014, RES POLICY, V43, P1067, DOI 10.1016/j.respol.2013.12.007  
 Poputoaia D, 2010, ENERG POLICY, V38, P3820, DOI 10.1016/j.enpol.2010.03.002  
 Richerzhagen C., 2008, ENERGY EFFICIENCY BU  
 Saidur R, 2010, ENERGY, V35, P4780, DOI 10.1016/j.energy.2010.09.012  
 SANTAMOURIS M, 1994, ENERG CONVERS MANAGE, V35, P293, DOI 10.1016/0196-8904(94)90062-0  
 Schleich J, 2008, ENERG ECON, V30, P449, DOI 10.1016/j.eneco.2006.08.004  
 Schleich J, 2009, ECOL ECON, V68, P2150, DOI 10.1016/j.ecolecon.2009.02.008  
 Singer B.C., 2009, HIGH PERFORMANCE HEA  
 Sovacool BK, 2009, TECHNOL SOC, V31, P365, DOI 10.1016/j.techsoc.2009.10.009  
 Tuominen P, 2012, ENERG BUILDINGS, V51, P48, DOI 10.1016/j.enbuild.2012.04.015  
 UNEP SBCI, 2009, BUILD CLIM CHANG SUM  
 Wang GH, 2008, ENERG POLICY, V36, P1879, DOI 10.1016/j.enpol.2008.02.006  
 Wang T, 2014, RENEW SUST ENERG REV, V31, P520, DOI 10.1016/j.rser.2013.12.023  
 Williams K, 2007, SUSTAIN DEV, V15, P135, DOI 10.1002/sd.308  
 Zhang YR, 2013, ENERG POLICY, V62, P768, DOI 10.1016/j.enpol.2013.06.128  
 Zhou N, 2010, ENERG POLICY, V38, P6439, DOI 10.1016/j.enpol.2009.08.015

NR 41

TC 3

Z9 3

U1 6

U2 26

PU PERGAMON-ELSEVIER SCIENCE LTD

PI OXFORD

PA THE BOULEVARD, LANGFORD LANE, KIDLINGTON, OXFORD OX5 1GB, ENGLAND

SN 0360-5442

EI 1873-6785

J9 ENERGY

JI Energy

PD MAY 15

PY 2016

VL 103

BP 588

EP 597

DI 10.1016/j.energy.2016.03.039

PG 10

WC Thermodynamics; Energy & Fuels

SC Thermodynamics; Energy & Fuels

GA DN1BC

UT WOS:000376800200049

DA 2018-05-03

ER

PT J

AU Abushnaf, J

Rassau, A

Gornisiewicz, W

AF Abushnaf, Jamal

Rassau, Alexander

Gornisiewicz, Wlodzimierz

TI Impact on electricity use of introducing time-of-use pricing to a

multi-user home energy management system

SO INTERNATIONAL TRANSACTIONS ON ELECTRICAL ENERGY SYSTEMS

LA English

DT Article

DE home energy management; time of use; controllable load; multiple

inhabitants

#### ID DEMAND RESPONSE; LOAD CONTROL

AB Home energy management system technology can provide a smart and efficient way of optimizing energy usage in residential buildings. This paper presents a home energy management system algorithm that monitors and controls household appliances based on time-of-use (TOU) energy pricing models while accounting for multiple inhabitants sharing a home and its appliances. This algorithm helps to manage and schedule usage by prioritizing multiple users with preferred usage patterns. Two different scenarios will be implemented to develop and test the influence of a multiple-users and load priority (MULP) algorithm on reducing energy consumption, energy cost and carbon footprint. In the first scenario, TOU pricing and different demand limits are used, while the second scenario focuses on the TOU pricing with different demand limits combined with the MULP model. Simulation results show that the combination of the MULP model and the TOU pricing leads to significant reductions in user payments and total energy consumption. Copyright (C) 2015 John Wiley & Sons, Ltd.

C1 [Abushnaf, Jamal; Rassau, Alexander; Gornisiewicz, Wlodzimierz] Edith Cowan Univ, Sch Engr, Joondalup, WA 6027, Australia.

RP Abushnaf, J (reprint author), Edith Cowan Univ, Sch Engr, Joondalup, WA 6027, Australia.

EM jabushna@our.ecu.edu.au

CR AboGaleela M., 2013, ENERGY POWER ENG, V5, P889

Albadi MH, 2008, ELECTR POW SYST RES, V78, P1989, DOI 10.1016/j.epsr.2008.04.002

Biol F., 2012, WORLD EN OUTL 2012

Breukers S. C., 2013, END USERS STARTING P

Chen X.Y., 2013, MATH PROBL ENG, V2013, P1, DOI DOI 10.1371/JOURNAL.PONE.0070914

Du PW, 2011, IEEE T SMART GRID, V2, P411, DOI 10.1109/TSG.2011.2140344

EPR Institute, RELOAD DAT DOC EV US

Erol-Kantarci M, 2011, IEEE T SMART GRID, V2, P314, DOI 10.1109/TSG.2011.2114678

Erol-Kantarci M., 2010, VEH TECHN C FALL VTC, V72, P1

Han P., 2012, INF SCI TECHN ICIST, P393

Huang KY, 2004, IEEE T POWER SYST, V19, P1626, DOI 10.1109/TPWRS.2004.831705

Johnston MM, 2010, DIRECT LOAD CONTROL

Joo J.-Y., 2007, P IEEE POW ENG SOC G, P1

Mohsenian-Rad AH, 2010, IEEE T SMART GRID, V1, P120, DOI 10.1109/TSG.2010.2055903

Pipattanasomporn M, 2012, IEEE T SMART GRID, V3, P2166, DOI 10.1109/TSG.2012.2201182

Safdarian A, MEDIUM TERM DECISION

Safdarian A, 2014, INTEGRATION PRICE BA

Safdarian A, 2014, DISTRIBUTED ALGORITHM

Safdarian A, 2014, IEEE T POWER DELIVER, V29, P733, DOI 10.1109/TPWRD.2013.2277211

Samadi P, 2013, IEEE T SMART GRID, V4, P1007, DOI 10.1109/TSG.2012.2234769

Son YS, 2010, IEEE T CONSUM ELECTR, V56, P1380, DOI 10.1109/TCE.2010.5606273

UNEP SBCI, 2009, BUILD CLIM CHANG SUM

Yi PZ, 2013, IEEE T SMART GRID, V4, P227, DOI 10.1109/TSG.2012.2225155

NR 23

TC 3

Z9 3

U1 0

U2 5

PU WILEY-BLACKWELL

PI HOBOKEN

PA 111 RIVER ST, HOBOKEN 07030-5774, NJ USA

SN 2050-7038

J9 INT T ELECTR ENERGY

JI Int. Trans. Electr. Energy Syst.

PD MAY

PY 2016

VL 26

IS 5

BP 993

EP 1005

DI 10.1002/etep.2118

PG 13

WC Engineering, Electrical & Electronic

SC Engineering

GA DL9BC

UT WOS:000375935200005

DA 2018-05-03

ER

PT J

AU Ornetzeder, M

Wicher, M

Suschek-Berger, J

AF Ornetzeder, Michael

Wicher, Magdalena

Suschek-Berger, Juergen

TI User satisfaction and well-being in energy efficient office buildings:

Evidence from cutting-edge projects in Austria

SO ENERGY AND BUILDINGS

LA English

DT Article

DE Energy efficiency; Office buildings; Well-being; User satisfaction;

Survey; Case studies; Sociomaterial perspective

ID THERMAL COMFORT; PERFORMANCE; TECHNOLOGIES; ENVIRONMENTS; BEHAVIOR;

FIELD; GAP

AB This paper aims to improve our knowledge of energy use and well-being in energy efficient office buildings. It explores the interrelations between forms and patterns of energy use on the one hand and user satisfaction, comfort, and well-being on the other hand. Findings are derived from qualitative and quantitative data collected in a recently finished research project in Austria. Fieldwork consisted of two qualitative case studies as well as an online-based survey amongst users of energy efficient office buildings. In addition, secondary data from energy-monitoring research was used to underpin the analysis. The results show that extremely low levels of energy use in office buildings can be aligned with high levels of well-being. Based on empirical findings the paper argues that both well-being and energy performance in office buildings are the result of a complex, on-going and intertwined process that involves various material and social elements. (C) 2016 Elsevier B.V. All rights reserved.

C1 [Ornetzeder, Michael] Austrian Acad Sci, Inst Technol Assessment, Strohgasse 45-5, A-1030 Vienna, Austria.

[Wicher, Magdalena; Suschek-Berger, Juergen] IFZ Interuniv Res Ctr Technol Work & Culture, Schloegelgasse 2, A-8010 Graz, Austria.

RP Ornetzeder, M (reprint author), Austrian Acad Sci, Inst Technol Assessment, Strohgasse 45-5, A-1030 Vienna, Austria.

EM michael.ornetzeder@oeaw.ac.at

FU Austrian Ministry for Transport, Innovation and Technology

FX This work was supported by the Austrian Ministry for Transport,

Innovation and Technology. All authors contributed equally in the

preparation of this manuscript. We would like to thank all of the

interview partners from the two case-study buildings and our colleagues

Peter Franz, Daniela Freitag, Julia Haslinger, Albert Pilger, Harald

Rohracher, Susanne Schidler, Erich Schober, Anita Thaler, Wibke

Tritthart.

CR Aune M, 2009, FACILITIES, V27, P44, DOI 10.1108/02632770910923081

Bluyssen PM, 2011, BUILD ENVIRON, V46, P2632, DOI 10.1016/j.buildenv.2011.06.026

Bordass B, 2001, BUILD RES INF, V29, P114, DOI 10.1080/09613210010008036

Brown Z, 2009, BUILD RES INF, V37, P227, DOI 10.1080/09613210902794135

Choi J, 2010, BUILD ENVIRON, V45, P1529, DOI 10.1016/j.buildenv.2010.01.004

Goschenhofer T., 2011, THESIS U APPL SCI TE

Gou ZH, 2012, INDOOR BUILT ENVIRON, V21, P503, DOI 10.1177/1420326X11418700

Gram-Hanssen K, 2008, J CLEAN PROD, V16, P1181, DOI 10.1016/j.jclepro.2007.08.006

Gram-Hanssen K, 2010, BUILD RES INF, V38, P175, DOI 10.1080/09613210903541527



Kahneman D, 1999, WELL BEING FDN HEDON  
Karjalainen S, 2007, BUILD ENVIRON, V42, P1594, DOI 10.1016/j.buildenv.2006.01.009  
Keul A. G., 2010, UMWELTPSYCHOLOGIE, V14, P66  
Leaman A, 2001, BUILD RES INF, V29, P129, DOI 10.1080/09613210010008045  
Leaman A, 2007, BUILD RES INF, V35, P662, DOI 10.1080/09613210701529518  
Lee SY, 2005, J ENVIRON PSYCHOL, V25, P323, DOI 10.1016/j.jenvp.2005.08.001  
Lehmann B, 2010, ENERG BUILDINGS, V42, P1958, DOI 10.1016/j.enbuild.2010.06.002  
Leonardi PM, 2013, INFORM ORGAN-UK, V23, P59, DOI 10.1016/j.infoandorg.2013.02.002  
Liu J, 2014, INDOOR BUILT ENVIRON, V23, P675, DOI 10.1177/1420326X13481048  
Marszal AJ, 2011, ENERG BUILDINGS, V43, P971, DOI 10.1016/j.enbuild.2010.12.022  
Menezes AC, 2012, APPL ENERG, V97, P355, DOI 10.1016/j.apenergy.2011.11.075  
Paul WL, 2008, BUILD ENVIRON, V43, P1858, DOI 10.1016/j.buildenv.2007.11.006  
Rohracher H., 2002, BUILT ENV, V28, P73  
Sarbu I, 2013, ENERG BUILDINGS, V60, P410, DOI 10.1016/j.enbuild.2013.02.005  
Shove E., 2012, DYNAMICS SOCIAL PRAC, Vvii  
Soutullo S, 2014, ENERG BUILDINGS, V81, P424, DOI 10.1016/j.enbuild.2014.06.049  
Stemmers K, 2010, BUILD ENVIRON, V45, P270, DOI 10.1016/j.buildenv.2009.08.025  
Storey J. B., 2006, 12 RINK INT C  
Sunikka-Blank M, 2012, BUILD RES INF, V40, P260, DOI 10.1080/09613218.2012.690952  
Ucci M, 2014, INDOOR BUILT ENVIRON, V23, P335, DOI 10.1177/1420326X14533256  
Veitch JA, 2007, J ENVIRON PSYCHOL, V27, P177, DOI 10.1016/j.jenvp.2007.04.002  
Voss K, 2007, SOL ENERGY, V81, P424, DOI 10.1016/j.solener.2006.04.008  
Wagner A, 2007, ENERG BUILDINGS, V39, P758, DOI 10.1016/j.enbuild.2007.02.013  
Wilhite H, 2008, ENERG EFFIC, V1, P121, DOI 10.1007/s12053-008-9006-x

NR 33

TC 3

Z9 3

U1 1

U2 14

PU ELSEVIER SCIENCE SA

PI LAUSANNE

PA PO BOX 564, 1001 LAUSANNE, SWITZERLAND

SN 0378-7788

EI 1872-6178

J9 ENERG BUILDINGS

JI Energy Build.

PD APR 15

PY 2016

VL 118

BP 18

EP 26

DI 10.1016/j.enbuild.2016.02.036

PG 9

WC Construction & Building Technology; Energy & Fuels; Engineering, Civil

SC Construction & Building Technology; Energy & Fuels; Engineering

GA DJ7CM

UT WOS:000374369500002

DA 2018-05-03

ER

FN Clarivate Analytics Web of Science

VR 1.0

PT J

AU Sanseverino, ER

Scaccianoce, G

Vaccaro, V

Carta, M

Sanseverino, RR

AF Sanseverino, Eleonora Riva

Scaccianoce, Gianluca  
 Vaccaro, Valentina  
 Carta, Maurizio  
 Sanseverino, Raffaella Riva

TI Smart Cities and Municipal Building Regulation for Energy Efficiency  
 SO INTERNATIONAL JOURNAL OF AGRICULTURAL AND ENVIRONMENTAL INFORMATION  
 SYSTEMS

LA English

DT Article

DE Energy Efficiency in Buildings; Municipal Building Regulation; Smart  
 City; Smart Planning Protocol; Sustainable Urban Planning

AB The "Smart Cities & Communities Initiative" of the Strategic Energy Technology Plan is the strategic European response to lead cities and regions to a carbon free future. In this contest energy efficiency in buildings has a crucial role and must be considered in a holistic approach to the urban planning. In order to implement the minimum requirements stated by the European Directive about the Energy Performance of Buildings, and in order to consider different planning layers with the view to a smart city planning, local regulations are a key factor aiming at sustainable territorial planning. This paper investigates the possibility to draft a basic structure of Municipal Building Regulations in order to guide local administrators and technicians and to limit discretionary power of bureaucracy. The paper is organized as follows. First, a review of the most common practices for building regulations in Europe is proposed, then the basic structure of a municipal building regulation for the city of Palermo (Southern Italy) accounting for sustainability is discussed.

C1 [Sanseverino, Eleonora Riva] Univ Palermo, Dept Energy Informat Engn & Math Models, Elect Syst Energy, Palermo, Italy.

[Scaccianoce, Gianluca] Univ Palermo, Dept Energy Informat Engn & Math Models, Environm Tech Phys, Palermo, Italy.

[Vaccaro, Valentina] Univ Palermo, Dept Energy Informat Engn & Math Models, Palermo, Italy.

[Carta, Maurizio; Sanseverino, Raffaella Riva] Univ Palermo, Dept Architecture, Urbanism & Reg Planning, Palermo, Italy.

RP Sanseverino, ER (reprint author), Univ Palermo, Dept Energy Informat Engn & Math Models, Elect Syst Energy, Palermo, Italy.

OI vaccaro, valentina/0000-0001-9888-0314

CR Agudelo-Vera CM, 2013, WATER RES, V47, P7287, DOI 10.1016/j.watres.2013.10.040

Alzoubi HH, 2015, SUSTAIN CITIES SOC, V14, P441, DOI 10.1016/j.scs.2014.06.001

Andersen PH, 2009, ENERG POLICY, V37, P2481, DOI 10.1016/j.enpol.2009.03.032

Annunziata E, 2013, ENERGY, V57, P125, DOI 10.1016/j.energy.2012.11.049

Ballarini I, 2012, ENERG BUILDINGS, V52, P168, DOI 10.1016/j.enbuild.2012.06.004

Barbieri ES, 2012, APPL ENERG, V97, P714, DOI 10.1016/j.apenergy.2012.01.001

Barrau J, 2014, ENERG BUILDINGS, V76, P459, DOI 10.1016/j.enbuild.2014.03.017

Barthel C., 2012, ANAL PROPOSED ECO DE

Behera M, 2014, CONSTR BUILD MATER, V68, P501, DOI 10.1016/j.conbuildmat.2014.07.003

Bellia L, 2014, ENRGY PROCED, V62, P309, DOI 10.1016/j.egypro.2014.12.392

Berardi U, 2014, APPL ENERG, V115, P411, DOI 10.1016/j.apenergy.2013.10.047

Brun A, 2013, APPL ENERG, V112, P338, DOI 10.1016/j.apenergy.2013.05.052

Carta M., 2014, SMART RULES SMART CI, P123, DOI [10.1007/978-3-319-06422-2\_8, DOI 10.1007/978-3-319-06422-2\_8]

Carta M., 2014, REIMAGINING URBANISM

Casisi M, 2009, ENERGY, V34, P2175, DOI 10.1016/j.energy.2008.10.019

Causone F, 2014, ENRGY PROCED, V62, P280, DOI 10.1016/j.egypro.2014.12.389

Cervigni G., 2011, RES REPORT

Cholewa T, 2013, ENERG BUILDINGS, V66, P599, DOI 10.1016/j.enbuild.2013.07.065

Cocchia A, 2014, PROGR IS, P13, DOI 10.1007/978-3-319-06160-3\_2

Costantino D., 2013, SUSTAINABILITY ENERG, P975, DOI DOI 10.1007/978-3-642-36645-1\_86

D'Oca S, 2014, ENERGY RES SOC SCI, V3, P131, DOI 10.1016/j.erss.2014.07.015

Dama A., 2005, VETRI AD ALTE PRESTA, V2005

Deakin M., 2007, EYESREG GIORNALE SCI, V14, P131

Di Monaco D., 2013, LINEE GUIDA OPERATIV

Dirks S., 2009, VISION SMARTER CITIE

- [Anonymous], 2012, 15232 EN EUR STAND  
ENEA R, 2012, RAPPORTO ANNUALE EFF  
Filogamo L, 2014, APPL ENERG, V135, P825, DOI 10.1016/j.apenergy.2014.04.002  
Ford B., 2007, PASSIVHAUS STANDAR 1  
Lima CAF, 2012, ENERGY, V45, P528, DOI 10.1016/j.energy.2012.02.033  
Gagliano A, 2015, BUILD ENVIRON, V90, P71, DOI 10.1016/j.buildenv.2015.02.043  
Gago EJ, 2015, RENEW SUST ENERG REV, V41, P1, DOI 10.1016/j.rser.2014.08.002  
Gago EJ, 2013, RENEW SUST ENERG REV, V25, P749, DOI 10.1016/j.rser.2013.05.057  
Gallagher J, 2015, RENEW ENERG, V81, P808, DOI 10.1016/j.renene.2015.03.078  
Gao YF, 2014, ENERG POLICY, V74, P190, DOI 10.1016/j.enpol.2014.05.036  
Garg N, 2013, APPL ACOUST, V74, P1429, DOI 10.1016/j.apacoust.2013.05.012  
Greco I, 2014, LECT NOTES COMPUT SC, V8580, P579, DOI 10.1007/978-3-319-09129-7\_42  
Gurung TR, 2015, J CLEAN PROD, V87, P642, DOI 10.1016/j.jclepro.2014.09.054  
Hadley S. W., 2009, ELECT J, V22, P56, DOI DOI 10.1016/J.TEJ.2009.10.011  
Hesaraki A, 2013, BUILD ENVIRON, V64, P85, DOI 10.1016/j.buildenv.2013.02.009  
Hoffmann C, 2012, CONSTR BUILD MATER, V35, P701, DOI 10.1016/j.conbuildmat.2011.10.007  
ILETE Initiative for Low Energy Training in Europe, 2010, LABL CERT GUID  
Infoenergia & Department BEST. Politecnico di Milano, 2012, DEF REG STRUM URB OR  
Ippolito MG, 2014, ENERG BUILDINGS, V69, P33, DOI 10.1016/j.enbuild.2013.10.025  
[Anonymous], 2008, 137902008 ISO INT OR  
[Anonymous], 2003, 15099 ISO  
[Anonymous], 2014, DPCM 26 SETT 2014 PI  
Jaber S, 2011, ENERG BUILDINGS, V43, P1829, DOI 10.1016/j.enbuild.2011.03.024  
Jang H. S., 2014, BUILDING ENV  
Jin JT, 2014, ENERG BUILDINGS, V85, P473, DOI 10.1016/j.enbuild.2014.09.080  
Klobut K., 2013, NEW REGULATION SETS  
Kontoleon KJ, 2015, APPL ENERG, V144, P152, DOI 10.1016/j.apenergy.2015.01.087  
Kurra S, 2012, BUILD ENVIRON, V49, P291, DOI 10.1016/j.buildenv.2011.07.006  
Kylili A., 2015, EUROPEAN SMART CITIE  
La Gennusa M, 2011, ENERG POLICY, V39, P5335, DOI 10.1016/j.enpol.2011.05.031  
Li MC, 2014, ENERG BUILDINGS, V82, P47, DOI 10.1016/j.enbuild.2014.07.010  
Liu JY, 2015, ENERG BUILDINGS, V86, P449, DOI 10.1016/j.enbuild.2014.10.062  
Long Zhou, 2010, 2010 International Conference on Machine Learning and Cybernetics (ICMLC 2010), P3213, DOI 10.1109/ICMLC.2010.5580715  
Maivel M, 2014, ENERG BUILDINGS, V69, P224, DOI 10.1016/j.enbuild.2013.10.030  
Manfren M, 2011, APPL ENERG, V88, P1032, DOI 10.1016/j.apenergy.2010.10.018  
Mattoni B., 2015, MULTILEVEL METHOD AS  
Matuska T, 2006, SOL ENERGY, V80, P1443, DOI 10.1016/j.solener.2006.04.006  
McNabola A, 2014, WATER POLICY, V16, P168, DOI 10.2166/wp.2013.164  
Municipality of Bari, 2012, NUOV REG ED CITT BAR  
Municipality of Bologna, 2009, REG URB ED  
Municipality of Monterotondo, 2009, NORM SOST AMB ALL RE  
Nanni G., 2013, REGOLAMENTI EDILIZI  
Numan MY, 1999, APPL ENERG, V64, P401, DOI 10.1016/S0306-2619(99)00109-9  
Pagliano L., 2009, PASSIVHAUS SUD EUROP  
Parise G., 2009, IEEE IAS ANN M HOUST, P1  
Popa M., 2011, UPB SCI B SERIES C, V73  
Raji B, 2015, RENEW SUST ENERG REV, V45, P610, DOI 10.1016/j.rser.2015.02.011  
Ramponi R, 2014, APPL ENERG, V123, P185, DOI 10.1016/j.apenergy.2014.02.041  
Cresme Ricerche S. P. A., 2012, REGOLAMENTI EDILIZI  
Rodrigues C. R. B. S., 2011, 2011 IEEE 20th International Symposium on Industrial Electronics (ISIE 2011), P141, DOI 10.1109/ISIE.2011.5984147  
Rodriguez-Soria B, 2014, RENEW SUST ENERG REV, V34, P78, DOI 10.1016/j.rser.2014.03.009  
SAGUAN M., 2009, SMART METERING SUMMA  
Sanseverino ER, 2014, ENERG POLICY, V66, P592, DOI 10.1016/j.enpol.2013.11.007  
Riva Sanseverino E., 2015, ATLANTE SMART CITY C  
Sanseverino E. R., 2014, SMART RULES SMART CI, V12  
Santamouris M, 2014, SOL ENERGY, V103, P682, DOI 10.1016/j.solener.2012.07.003

Santamouris M, 2013, RENEW SUST ENERG REV, V26, P224, DOI 10.1016/j.rser.2013.05.047  
Santamouris M, 2013, ENERG BUILDINGS, V57, P74, DOI 10.1016/j.enbuild.2012.11.002  
Serghides DK, 2012, J BUILD PHYS, V36, P83, DOI [10.1177/1744259112448369, 10.1177/174425912448369]  
Stankovic B, 2014, ENERGY SUSTAIN DEV, V19, P56, DOI 10.1016/j.esd.2013.12.001  
Stazi F, 2014, SOL ENERGY, V105, P512, DOI 10.1016/j.solener.2014.04.005  
Tsilini V, 2015, SUSTAIN CITIES SOC, V14, P323, DOI 10.1016/j.scs.2014.08.006  
Ueno T, 2006, APPL ENERG, V83, P166, DOI 10.1016/j.apenergy.2005.02.002  
[Anonymous], 2008, 15251 UNI EN  
[Anonymous], 2008, 137862008 UNI EN ISO  
Vaccaro V., 2014, SMART RULES SMART CI, P59, DOI [10.1007/978-3-319-06422-2\_5, DOI 10.1007/978-3-319-06422-2\_5]  
van Gerwen R., 2006, SMART METERING LEONA, V9  
Varga M., 2007, SERVICE BUILDINGS KE  
Vermande H., 2011, LEAD MARKET INITIATI  
Wood G, 2003, ENERG BUILDINGS, V35, P821, DOI 10.1016/S0378-7788(02)00241-4  
Zangheri P., 2009, ECEEE SUMMER STUDY A, P1643  
Zhou GB, 2015, APPL ENERG, V138, P648, DOI 10.1016/j.apenergy.2014.10.058

NR 97  
TC 3  
Z9 3  
U1 2  
U2 2  
PU IGI GLOBAL  
PI HERSHEY  
PA 701 E CHOCOLATE AVE, STE 200, HERSHEY, PA 17033-1240 USA  
SN 1947-3192  
EI 1947-3206  
J9 INT J AGRIC ENVIRON  
JI Int. J. Agric. Environ. Inf. Syst.  
PD OCT-DEC  
PY 2015  
VL 6  
IS 4  
BP 56  
EP 82  
DI 10.4018/IJAEIS.2015100104  
PG 27  
WC Computer Science, Interdisciplinary Applications  
SC Computer Science  
GA V4J1V  
UT WOS:000218980200005  
DA 2018-05-03  
ER

PT J  
AU Oliveira, MHD  
Rebelatto, DAD  
AF da Fonseca Oliveira, Mario Henrique  
do Nascimento Rebelatto, Daisy Aparecida  
TI The evaluation of electric energy consumption in the Brazilian  
residential sector: A technological improvement proposal in order to  
increase its efficiency  
SO RENEWABLE & SUSTAINABLE ENERGY REVIEWS  
LA English  
DT Review  
DE Electricity; Energy efficiency; Econometrics  
ID PERFORMANCE

AB In light of Brazil's socio-economic development in the last 20 years, the population has greater access to consumer goods, hence impacting the escalating growth in electricity demand, thereby resulting in the need for substantial investments in electricity generation and transmission. In contrast, government institutions have not taken effective measures to increase the energy efficiency of the most impactful energy-consuming appliances, which would reduce the need for energy investments. Through econometric models, Brazil's residential electricity consumption was projected up to 2030 and it is predicted that results can be achieved if through tax exemption, the government can promote the use of more energy-efficient technologies. Through an economic and financial evaluation, our study analyzes the potential effects of a decrease in tax revenues for the State in light of lower investment needs in energy generation and distribution. (C) 2015 Elsevier Ltd. All rights reserved.

C1 [da Fonseca Oliveira, Mario Henrique; do Nascimento Rebelatto, Daisy Aparecida] Univ Sao Paulo, BR-13566590 Sao Carlos, SP, Brazil.

RP Oliveira, MHD (reprint author), Univ Sao Paulo, Av Trabalhador Sao Carlense 400, BR-13566590 Sao Carlos, SP, Brazil.

EM mariohfo@hotmail.com; daisy@sc.usp.br

CR Almeida Ad, 2011, ENERGY BUILD, V43, P1884, DOI 10.1016/J.ENBUILD.2011.03.027

Boadle A., 2013, REUTERS BRAZIL

Borges CB, 2010, FACEF PESQUI, V13

Brazilian Institute of Geography and Statistics, CONT US

Central Bank of Brazil, SEL FED SEC MARK

Cheng S, 2014, APPL THERM ENG, V64, P83, DOI 10.1016/j.applthermaleng.2013.12.022

Davis L.W., 2012, 18044 NBER

Eletrobras, EL EST CONS MED MENS

Fridley DG, 2001, TECHNICAL EC ANAL EN

Gall N, 2002, APAGAO POLITICA ENER

Gaspar M., 2012, EC VEJA

Ghisi E, 2007, ENER POLICY, V35, P4107, DOI 10.1016/j.enpol.2007.02.020

Gomes Jo 綑 Paulo Pombeiro, 2009, Rev. Adm. P 鷄 lica, V43, P295, DOI 10.1590/S0034-76122009000200002

Greene W., 2008, ECONOMETRIC ANAL

Greening LA, 2000, ENER POLICY, V28, P389

Gujarati D. N., 2012, BASIC ECONOMETRICS

Instituto nacional de metrologia qualidade e tecnologia, 2014, PROGR BRAS ET TAB CH

Instituto nacional de metrologia qualidade e tecnologia, 2005, PROGR BRAS ET REFR A

Instituto nacional de metrologia qualidade e tecnologia, PROGR BRAS ET EF EN

IPCC, 2007, INT PAN CLIM CHANG 4

Islam MS, 2009, PHYSICA B, V404, P2495, DOI 10.1016/j.physb.2009.05.026

Kitanovski A, 2007, ANN REP 2007

Kuijpers M, 2014, J CLEAN PROD

Kutner M., 2004, APPL LINEAR REGRESSI

Letschert V, 2013, ENERGY, V59, P72, DOI 10.1016/j.energy.2013.06.067

Liu DY, 2004, APPL THERM ENG, V24, P2281, DOI 10.1016/j.applthermaleng.2004.01.009

Lucena A. F. P., 2015, ENERGY EC

Maass GJ., 2011, USO ELETRONICA COMPR

Ministerio da Ciencia Tecnologia e Inovacao, FACT AV CO2 EM GRID

Ministe'rio de Minas e Energia, 2013, PLAN DEC EXP EN 2022

Mueller C, 2010, INT S NEXT GEN AIR C

Nadel S., 2012, REBOUND EFFECT LARGE

Naspolini HF, 2010, ENERG CONVERS MANAGE, V51, P2835, DOI 10.1016/j.enconman.2010.06.021

Nerini FF, 2014, ENERGY SUSTAIN DEV, V20, P36, DOI 10.1016/j.esd.2014.02.005

Oliveira LFC, 2008, ENG AGR, V28

Palmeirim AF, 2014, BIOL CONSERV, V174, P30, DOI 10.1016/j.biocon.2014.03.015

Secretary of the federal revenue of Brazil, TAX SYST ADM BRAZ

Shah N, 2014, LBNL6164E

Silva CA, P 2013 IEEE INT EL M

Song ML, 2015, RENEW SUST ENER REV, V43, P65, DOI 10.1016/j.rser.2014.11.050

Song ML, 2013, ENER ENVIRON-UK, V24, P939, DOI 10.1260/0958-305X.24.6.939

Souza DLO, 2004, REV ED TECNOL

Stern N., 2007, EC CLIMATE CHANGE ST

Superintendencia da Zona Franca de Manaus, IND IND  
The United Nations, WORLD POP PROSP 2012  
World Bank, DATA  
Yu BY, 2013, ENERG POLICY, V57, P441, DOI 10.1016/j.enpol.2013.02.024

NR 47

TC 3

Z9 3

U1 1

U2 13

PU PERGAMON-ELSEVIER SCIENCE LTD

PI OXFORD

PA THE BOULEVARD, LANGFORD LANE, KIDLINGTON, OXFORD OX5 1GB, ENGLAND

SN 1364-0321

J9 RENEW SUST ENERG REV

J1 Renew. Sust. Energ. Rev.

PD SEP

PY 2015

VL 49

BP 836

EP 844

DI 10.1016/j.rser.2015.04.069

PG 9

WC GREEN & SUSTAINABLE SCIENCE & TECHNOLOGY; Energy & Fuels

SC Science & Technology - Other Topics; Energy & Fuels

GA CL7HA

UT WOS:000357141900066

DA 2018-05-03

ER

PT J

AU Wang, XH

Zhu, LY

Qian, YT

Tang, LB

AF Wang Xiaohua

Zhu Liyun

Qian Yuting

Tang Libin

TI RURAL HOUSEHOLD ENERGY CONSUMPTION IN JIANGSU PROVINCE OF CHINA

SO ENERGY & ENVIRONMENT

LA English

DT Article

DE Rural energy; Biomass energy; Energy consumption; Energy policy

ID ECONOMIC-DEVELOPMENT; TRANSITION; REGION

AB Rural household energy consumption is an important component of the national total energy consumption. This has major implications for rural society, economy, and the environment. Jiangsu province is located in the economically developed coastal area, and assuming further social and economic development in its rural regions, commercial energy will become increasingly essential for rural households. By studying and analyzing change across time and region in southern, central and northern Jiangsu, we hope to contribute to the understanding of the change in rural household energy consumption in both China and the developing countries in general. Using questionnaires, household energy consumption and related problems were investigated in nine typical counties in Jiangsu province to show the large differences in the level of per capita rural household consumption and the structure of useful energy consumption in the typical areas. The current household consumption per capita is 396.93 kgce in a typical rural areas, with straw consumption contributing 38.73%, and electricity 32.96%. The structural differences of energy consumption and the percentage of commercial energy of useful heat in southern, central and northern Jiangsu were also investigated, as was the relationship between energy consumption

and household net income. The study should help in building a balanced system of energy demand and supply and utilizing biomass resources on a large scale.

- C1 [Wang Xiaohua] Nanjing Agr Univ, Coll Engr, Nanjing 210031, Jiangsu, Peoples R China.  
 [Zhu Liyun] Jiangsu Polytech Finance & Econ, Huaian City 223003, Jiangsu, Peoples R China.  
 [Qian Yuting] Jiangsu Agr Waste Treatment & Recycle Engr Res Ct, Nanjing 210014, Peoples R China.  
 [Tang Libin] Rural Energy & Ecol Environm Protect Technol Stn, Gaoyou City 225600, Jiangsu, Peoples R China.
- RP Wang, XH (reprint author), Nanjing Agr Univ, Coll Engr, Nanjing 210031, Jiangsu, Peoples R China.  
 EM xhwang@njau.edu.cn
- RI Wang, xiaohua/P-1525-2016
- OI Wang, xiaohua/0000-0002-8549-6097
- FU Management Office of the China Renewable Energy Scale-up Program (CRESP)
- FX This paper is based on "Assessment for Jiangsu Provincial Biomass Energy Resources and Study on the Development Planning" supported by The Management Office of the China Renewable Energy Scale-up Program (CRESP). I would like to thank many experts and organizations for great support to this research.
- CR Barnes DF, 2011, ENER POLICY, V39, P894, DOI 10.1016/j.enpol.2010.11.014  
 Carley S, 2011, RENEW SUST ENER REV, V15, P282, DOI 10.1016/j.rser.2010.08.006  
 Cheng C., 2004, RENEW ENER, V5, P26  
 Fan J, 2011, ENER POLICY, V39, P1200, DOI 10.1016/j.enpol.2010.11.048  
 LEACH G, 1992, ENER POLICY, V20, P116, DOI 10.1016/0301-4215(92)90105-B  
 Lu H, 2006, FINANCE TRADE RES, V3, P8  
 Majid E, 2002, ENER POLICY, V30, P815  
 Niu SW, 2011, RENEW ENER, V36, P1431, DOI 10.1016/j.renene.2010.11.003  
 Pachauri S, 2008, ENER POLICY, V36, P4022, DOI 10.1016/j.enpol.2008.06.016  
 Sopha BM, 2011, BIOMASS BIOENERG, V35, P652, DOI 10.1016/j.biombioe.2010.10.019  
 Tu WB, 2011, RENEW SUST ENER REV, V15, P856, DOI 10.1016/j.rser.2010.07.046  
 Wang CC, 2012, RENEW SUST ENER REV, V16, P2475, DOI 10.1016/j.rser.2012.01.070  
 Wang XH, 1999, ENERGY, V24, P413, DOI 10.1016/S0360-5442(99)00005-5  
 Wang XH, 2002, RENEW SUST ENER REV, V6, P395  
 Wang XH, 1996, ENERGY, V21, P703, DOI 10.1016/0360-5442(96)00019-9  
 Wang XH, 1997, ENERGY, V22, P511  
 Wang XH, 2001, ENER POLICY, V29, P1391  
 WANG XH, 2003, CHINA BIOGAS, V21, P41  
 Wijayatunga PDC, 2002, ENER CONVERS MANAGE, V43, P2213, DOI 10.1016/S0196-8904(01)00159-5  
 Yao CS, 2012, ENER POLICY, V41, P445, DOI 10.1016/j.enpol.2011.11.005  
 Zhou ZR, 2009, RENEW SUST ENER REV, V13, P187, DOI 10.1016/j.rser.2007.05.006
- NR 21  
 TC 3  
 Z9 3  
 U1 3  
 U2 21
- PU MULTI-SCIENCE PUBL CO LTD  
 PI BRENTWOOD  
 PA 5 WATES WAY, BRENTWOOD CM15 9TB, ESSEX, ENGLAND  
 SN 0958-305X  
 J9 ENER ENVIRON-UK  
 JI Energy Environ.  
 PD JUL  
 PY 2015  
 VL 26  
 IS 4  
 BP 631  
 EP 642  
 PG 12  
 WC Environmental Studies  
 SC Environmental Sciences & Ecology

GA CN6FD  
 UT WOS:000358528700007  
 DA 2018-05-03  
 ER

PT J

AU Azizi, NSM  
 Wilkinson, S  
 Fassman, E

AF Azizi, Nurul Sakina Mokhtar  
 Wilkinson, Suzanne  
 Fassman, Elizabeth

TI Strategies for improving energy saving behaviour in commercial buildings  
 in Malaysia

SO ENGINEERING CONSTRUCTION AND ARCHITECTURAL MANAGEMENT

LA English

DT Article

DE Malaysia; Energy efficiency; Management; Green buildings; Building  
 services; Energy saving behaviour

ID PERFORMANCE

AB Purpose - The purpose of this paper is to investigate the level of energy saving behaviour between green and conventional office buildings in Malaysia to determine if people in green buildings perform better energy saving behaviour than people in conventional buildings. The paper specifically focused on use of technology, computer usage and potential energy savings from that use. The paper then examines what strategies are used to encourage energy saving behaviour for building occupants.

Design/methodology/approach - Questionnaires were distributed to occupants in the buildings to evaluate the extent of energy saving behaviour practiced, and identify potential strategies to encourage energy saving behaviour.

Findings - The findings show better energy saving behaviour practice in green buildings and the paper show why this is the case. The recommended strategies to encourage energy saving behaviour are discussed, and include means of raising education awareness on energy efficiency among the occupants. This can be done through distribution of guidelines, posters, pamphlets and e-mails. Occupants can also be given live updates on the energy usage of the building. Briefing on the objectives and goals of the organisation's commitment to energy efficiency can be given to newly employed staff. As seen in this paper, these multiple strategies have shown to be successful in encouraging energy saving behaviours.

Originality/value - To date, energy saving behaviour has been given less focus in improving green building performance. There is limited research that compares energy saving behaviour between green and conventional commercial buildings in Malaysia. The findings provide a better understanding on occupants' behaviour in energy conservation and suggest strategies for future recommendation.

C1 [Azizi, Nurul Sakina Mokhtar; Fassman, Elizabeth] Univ Auckland, Dept Civil & Environm Engn, Auckland 1, New Zealand.

[Wilkinson, Suzanne] Univ Auckland, Dept Civil & Environm Engn, Construct Management, Auckland 1, New Zealand.

RP Azizi, NSM (reprint author), Univ Auckland, Dept Civil & Environm Engn, Auckland 1, New Zealand.

EM sakinamokhtar@gmail.com

OI mokhtar azizi, nurul sakina/0000-0002-8011-3552; Wilkinson,  
 Suzanne/0000-0002-7146-3016

CR Abrahamse W, 2005, J ENVIRON PSYCHOL, V25, P273, DOI 10.1016/j.jenvp.2005.08.002

Andrews C., 2010, INVESTIGATING OPPORT

Armitage L., 2010, PERFORMANCE PERCEPTI

Ashuri B., 2010, INT J FACIL MANAG, V1, P1

Fassman E., 2012, J LEGAL AFFAIRS DISP, V5, P205

Davidson P., 2009, AUSTR J ENV ED, V26, P85

Bond S, 2011, J PROP INVEST FINANC, V29, P494, DOI 10.1108/14635781111150367

Bordass B, 2001, BUILD RES INF, V29, P114, DOI 10.1080/09613210010008036

Bordass B., 2001, FLYING BLIND EVERYTH

British Columbia Construction Association, 2011, STUD RISKS LIAB GREE

Browne S., 1999, ECOMANAGEMENT AUDITI, V6, P80



CarbonTrust, 2010, EN MAN COMPR GUID CO  
 Haymaker H. R., 2013, J COMPUT CIVIL ENG, V28, P99  
 Cohen R, 2007, ASHRAE TRAN, V113, P14  
 Cole R., 1999, AIA USGBC C MAINSTR  
 D'Arelli P., 2008, REAL ESTATE ISSUES, V33, P15  
 Department of the Environment W. Heritage and the Arts, 2009, EC SUST DES ESD OP G  
 Deuble MP, 2012, BUILD ENVIRON, V56, P21, DOI 10.1016/j.buildenv.2012.02.029  
 DoE, 2013, EN EFF COMP US DEP E  
 EECA, 2011, SAV EN BUS EQ APPL A  
 EECA, 2010, ACT SHEET 4 SAV EN B  
 EECA, 2012, MAN EN GETT START EN  
 Energy Star, 2011, EN STAR GUID EN MAN  
 Esa M. R, 2011, AUSTR J BASIC APPL S, V5, P1806  
 Gabe J., 2011, 17 ANN PAC RIM REAL  
 Gabe J, 2008, 3 INT C SUST EN SCI  
 Goldblatt D. L., 2005, SUSTAINABLE ENERGY C  
 Heerwagen J., 2010, BEH EN CLIM CHANG C  
 Hes D., 2005, FACILITATING SUSTAIN  
 Hinders D., 2014, MUCH ELECT DOES COMP  
 Howe J. C., 2010, LAW GREEN BUILDINGS  
 Ibrahim K, 2007, AIP CONF PROC, V941, P164, DOI 10.1063/1.2806082  
 ISO, 2011, WIN EN CHALL ISO 500  
 Kang NN, 2012, ENERG BUILDINGS, V46, P112, DOI 10.1016/j.enbuild.2011.10.039  
 Kato H., 2010, PERFORMANCE PERCEPTI  
 Kolmuss A., 2002, ENVIRON EDUC RES, V8, P239, DOI DOI 10.1080/13504620220145401  
 KREJCIE RV, 1970, EDUC PSYCHOL MEAS, V30, P607, DOI 10.1177/001316447003000308  
 Kubba S, 2010, GREEN CONSTRUCTION PROJECT MANAGEMENT AND COST OVERSIGHT, P1, DOI  
 10.1016/B978-1-85617-676-7.00001-4  
 Likert R., 1932, ARCH PSYCHOL, V140, P1, DOI DOI 10.1111/J.1540  
 Lopes M. A. R., 2012, RENEW SUST ENER REV, V16, P4095  
 Lynam S., 2007, THESIS ROYAL ROADS U  
 Masoso OT, 2010, ENERG BUILDINGS, V42, P173, DOI 10.1016/j.enbuild.2009.08.009  
 MGGTW, 2010, GREEN PRACT  
 Ministry for the Environment, 2006, VAL CAS SUST BUILD N  
 Mokhtar S., 2013, J ARCHITECTURAL ENG, V10, P25  
 Monroe M.C., 2003, HUMAN ECOLOGY REV, V10, P113  
 Morris E., 2013, J ENERGY EFFICIENCY, V6, P425  
 Ostendorn May-, 2006, FINAL RES REPORT  
 Razak N. T. A., 2011, SUSTAINABLE DEV GREE  
 Reiss R, 2005, IMPROVING ENERGY PER  
 Ryu S. J., 2010, GUIDELINES MAKE VICT  
 Sawyer L., 2008, J FACILITIES, V26, P542  
 Scofield JH, 2009, ENERG BUILDINGS, V41, P1386, DOI 10.1016/j.enbuild.2009.08.006  
 Steinberg D., 2010, J GREEN BUILD, V4, P143  
 Steinberg D, 2009, J GREEN BUILD, V4, P175, DOI 10.3992/jgb.4.2.175  
 Sustainable Solutions Pty Ltd, 2001, GREEN OFF GUID  
 Tajabadi M. G., 2010, THESIS U TECHNOLOGY  
 Tenaga Nasional Berhad, 2014, PRIC AND TAR  
 Turner C., 2008, ENERGY PERFORMANCE L  
 Ulrich J., 2008, BBC NEWS 0104  
 Webber CA, 2006, ENERGY, V31, P2823, DOI 10.1016/j.energy.2005.11.007  
 Zimmerman DW, 2011, BRIT J MATH STAT PSY, V64, P388, DOI 10.1348/000711010X524739

NR 62

TC 3

Z9 3

U1 2

U2 7

PU EMERALD GROUP PUBLISHING LTD

PI BINGLEY  
 PA HOWARD HOUSE, WAGON LANE, BINGLEY BD16 1WA, W YORKSHIRE, ENGLAND  
 SN 0969-9988  
 EI 1365-232X  
 J9 ENG CONSTR ARCHIT MA  
 JI Eng. Constr. Archit. Manag.  
 PY 2015  
 VL 22  
 IS 1  
 BP 73  
 EP 90  
 DI 10.1108/ECAM-04-2014-0054  
 PG 18  
 WC Engineering, Industrial; Engineering, Civil; Management  
 SC Engineering; Business & Economics  
 GA CJ7BT  
 UT WOS:000355649600005  
 DA 2018-05-03  
 ER

PT S  
 AU Di Giuda, GM  
 Villa, V  
 Piantanida, P  
 AF Di Giuda, Giuseppe Martino  
 Villa, Valentina  
 Piantanida, Paolo  
 BE Perino, M  
 TI BIM and energy efficient retrofitting in school buildings  
 SO 6TH INTERNATIONAL BUILDING PHYSICS CONFERENCE (IBPC 2015)  
 SE Energy Procedia  
 LA English  
 DT Proceedings Paper  
 CT 6th International Building Physics Conference (IBPC)  
 CY JUN 14-17, 2015  
 CL Torino, ITALY  
 SP ATI Piemonte, PolitecnicoTorino, Dept Energy  
 DE BIM; schools; energy efficiency

AB The aim of the research project presented in this paper is to experiment actions to improve the existing school building management and maintenance through a technological and process innovation based on the Building Information Modeling (BIM). In the field of refurbishment and reuse of existing buildings, some of the most sensible and specific sectors are investigated, particularly focusing on energy efficiency, structural improvement, up-to-date information on completed works and quality control. The project's goal is to take advantage of the information technologies, beginning from software interoperability, and defining a new working philosophy that should use the BIM also in the monitoring, managing and maintenance phases. This will result in an advanced drafting of the design standards for refurbishment/reuse of public buildings by a hierarchic data structure (Preliminary Requirements). The optimization of the process will lead to a complete building modeling (architecture, structure, facilities, deterioration) in order to describe both the residual building performance and the outgoings of the refurbishment design (Final BIM Requirements). The research has been validated by on-field application (school buildings). (C) 2015 The Authors. Published by Elsevier Ltd.

C1 [Di Giuda, Giuseppe Martino; Villa, Valentina] Politecn Milan, ABC, I-20133 Milan, Italy.

[Piantanida, Paolo] Politecn Torino, DISEG, Corso Duca Abruzzi 24, I-10129 Turin, Italy.

RP Piantanida, P (reprint author), Politecn Torino, DISEG, Corso Duca Abruzzi 24, I-10129 Turin, Italy.

EM giuseppe.digiuda@polimi.it

OI Di Giuda, Giuseppe Martino/0000-0002-2294-0402

NR 0

TC 3

Z9 3  
U1 2  
U2 17  
PU ELSEVIER SCIENCE BV  
PI AMSTERDAM  
PA SARA BURGERHARTSTRAAT 25, PO BOX 211, 1000 AE AMSTERDAM, NETHERLANDS  
SN 1876-6102  
J9 ENRGY PROCED  
PY 2015  
VL 78  
BP 1045  
EP 1050  
DI 10.1016/j.egypro.2015.11.066  
PG 6  
WC Construction & Building Technology; Energy & Fuels; Physics, Applied  
SC Construction & Building Technology; Energy & Fuels; Physics  
GA BE3LF  
UT WOS:000370934401018  
OA gold  
DA 2018-05-03  
ER

PT S

AU Timma, L

Bariss, U

Blumberga, A

Blumberga, D

AF Timma, Lelde

Bariss, Uldis

Blumberga, Andra

Blumberga, Dagnija

BE Yan, J

Shamim, T

Chou, SK

Li, H

TI Outlining innovation diffusion processes in households using system dynamics. Case study: energy efficiency lighting

SO CLEAN, EFFICIENT AND AFFORDABLE ENERGY FOR A SUSTAINABLE FUTURE

SE Energy Procedia

LA English

DT Proceedings Paper

CT 7th International Conference on Applied Energy (ICAE)

CY MAR 28-31, 2015

CL Abu Dhabi, U ARAB EMIRATES

DE behavioural science; demand side management; households energy use; innovation diffusion; technology adoption; system dynamics

ID ENVIRONMENTAL BEHAVIOR

AB Various innovations have reached a mature state, but they diffuse slowly. The aim of our research is to propose the model of innovation diffusion for energy efficiency solutions in households. The methodology used combines empirical study with system dynamics modelling. As the case study light emitting diodes (LEDs) is studied. Although the system dynamics model was based on the one specific innovation diffusion process, its general application to other products and services is possible, since the developed model is white-box and can be used for further research of other processes. (C) 2015 The Authors. Published by Elsevier Ltd.

C1 [Timma, Lelde; Bariss, Uldis; Blumberga, Andra; Blumberga, Dagnija] Riga Tech Univ, Inst Energy Syst & Environm, LV-1048 Riga, Latvia.

RP Timma, L (reprint author), Riga Tech Univ, Inst Energy Syst & Environm, 12-1Azenes Iela, LV-1048 Riga, Latvia.

EM lelde.timma@rtu.lv  
 OI Blumberga, Andra/0000-0002-4712-4794  
 CR Bariss U, 2015, ENERGY PROC IN PRESS  
 BASS FM, 1969, MANAGE SCI, V15, P215, DOI 10.1287/mnsc.15.5.215  
 Central Statistical Bureau of Latvia, 2014, DAT  
 Cohen J, 1988, STAT POWER ANAL BEHA  
 [Joint Research Centre Institute for Energy and Transport European Commission], 2012, EN EFF STAT  
 REP 2012  
 FORRESTER JW, 1958, HARVARD BUS REV, V36, P37  
 Frederiks ER, 2015, RENEW SUST ENER REV, V41, P1385, DOI 10.1016/j.rser.2014.09.026  
 Karakaya E, 2014, RENEW SUST ENER REV, V33, P392, DOI 10.1016/j.rser.2014.01.083  
 Lindenberg S, 2007, J SOC ISSUES, V63, P117, DOI 10.1111/j.1540-4560.2007.00499.x  
 Ozaki R, 2011, BUS STRATEG ENVIRON, V20, P1, DOI 10.1002/bse.650  
 Peres R, 2010, INT J RES MARK, V27, P91, DOI 10.1016/j.ijresmar.2009.12.012  
 Rogers E., 2003, DIFFUSION INNOVATION  
 Tonglet M, 2004, RESOUR CONSERV RECY, V42, P27, DOI 10.1016/j.resconrec.2004.02.001  
 Vigants E, J CLEAN PRO IN PRESS  
 NR 14  
 TC 3  
 Z9 3  
 U1 0  
 U2 2  
 PU ELSEVIER SCIENCE BV  
 PI AMSTERDAM  
 PA SARA BURGERHARTSTRAAT 25, PO BOX 211, 1000 AE AMSTERDAM, NETHERLANDS  
 SN 1876-6102  
 J9 ENRGY PROCED  
 PY 2015  
 VL 75  
 BP 2859  
 EP 2864  
 DI 10.1016/j.egypro.2015.07.574  
 PG 6  
 WC Energy & Fuels; Environmental Sciences  
 SC Energy & Fuels; Environmental Sciences & Ecology  
 GA BD4SH  
 UT WOS:000361030004074  
 OA gold  
 DA 2018-05-03  
 ER  
  
 PT S  
 AU Vogel, JA  
 Lundqvist, P  
 Arias, J  
 AF Vogel, Jonas Anund  
 Lundqvist, Per  
 Arias, Jaime  
 BE Yan, J  
 Shamim, T  
 Chou, SK  
 Li, H  
 TI Categorizing barriers to energy efficiency in buildings  
 SO CLEAN, EFFICIENT AND AFFORDABLE ENERGY FOR A SUSTAINABLE FUTURE  
 SE Energy Procedia  
 LA English  
 DT Proceedings Paper  
 CT 7th International Conference on Applied Energy (ICAE)

CY MAR 28-31, 2015

CL Abu Dhabi, U ARAB EMIRATES

DE Energy efficiency; barriers; categorizing; sociotechnical system;  
multifamily buildings; Sweden

ID FRAMEWORK; GAP

AB Introducing new technologies in buildings in Sweden have historically been connected with great portions of scepticism, hence influencing the speed of acceptance of new technologies. The speed is slow even though technologies are tested, evaluated, proven to make an impact, and economic efficient. In order to understand acceptance of energy efficient technologies in multifamily buildings and to identify the origin of barriers to energy efficiency this paper investigates barriers as consequences of the current system structure in the Swedish building sector. The study views the Swedish building sector as a sociotechnical system built from technical artefacts, institutions, and actors, thus often deeply embedded in our societies. The Swedish building sector is well structured, resulting in that innovation and development occurring outside of the existing sociotechnical regime might not be recognized as feasible investments. In order to identify the structures enabling barriers to energy efficiency adoption this paper aims at developing a framework for categorizing barriers depending on their structural origin. The categorization framework is inspired by theories of sustainable innovation journeys and of soft systems and distinguishes between three decision-levels for barriers to energy efficiency: Project level, Sector level and Contextual level. By implementing the proposed categorization framework it becomes obvious that problem areas in the building sector are not connected to any specific structural level. However, results in this study reveal that most barriers originate in the Contextual level, which implies that energy and sustainability are not yet key aspects when forming and transforming contextual preconditions on how to design and build multifamily buildings in Sweden. (C) 2015 The Authors. Published by Elsevier Ltd.

C1 [Vogel, Jonas Anund; Lundqvist, Per; Arias, Jaime] Royal Inst Technol, Dept Energy Technol, SE-10044 Stockholm, Sweden.

RP Vogel, JA (reprint author), Royal Inst Technol, Dept Energy Technol, Brinellvagen 68, SE-10044 Stockholm, Sweden.

EM Jonas.anund@energy.kth.se

CR Backlund S, 2012, ENER POLICY, V51, P392, DOI 10.1016/j.enpol.2012.08.042

Blomkvist P, 2013, INT J COMMONS, V7, P113, DOI 10.18352/ijc.353

Chai KH, 2012, ENER POLICY, V46, P460, DOI 10.1016/j.enpol.2012.04.012

Checkland P., 1981, SYSTEMS THINKING SYS

Churchman C. W, 1968, SYSTEMS APPROACH

Geels FW, 2007, TECHNOL SOC, V29, P441, DOI 10.1016/j.techsoc.2007.08.009

Hughes T.P., 1999, SOCIAL CONSTRUCTION, P51

International Energy Agency, 2007, MIND GAP QUANT PRINC

JAFFE AB, 1994, ENER POLICY, V22, P804, DOI 10.1016/0301-4215(94)90138-4

Meadows Donella H., 2008, THINKING IN SYSTEMS

Ostrom E, 2005, UNDERSTANDING INSTITUTIONAL DIVERSITY, P1

Project Management Institute, 2013, GUID PROJ MAN BOD KN

Olsson Rader A., 2009, PLAN THEORY, V8, P263

Schleich J, 2008, ENER ECON, V30, P449, DOI 10.1016/j.eneco.2006.08.004

Schot J, 2008, TECHNOL ANAL STRATEG, V20, P537, DOI 10.1080/09537320802292651

Schot J, 2007, J EVOL ECON, V17, P605, DOI 10.1007/s00191-007-0057-5

Shove E., 1998, GAPS BARRIERS CONCEP

Sorrell S., 2000, REDUCING BARRIERS EN

Thollander P, 2012, ENER POLICY, V42, P461, DOI 10.1016/j.enpol.2011.12.012

Trianni A, 2012, ENERGY, V37, P494, DOI 10.1016/j.energy.2011.11.005

Anund Vogel J., 2014, BARRIERS IMPLEMENTIN

Weber L, 1997, ENER POLICY, V25, P833, DOI 10.1016/S0301-4215(97)00084-0

NR 22

TC 3

Z9 3

U1 1

U2 12

PU ELSEVIER SCIENCE BV

PI AMSTERDAM

PA SARA BURGERHARTSTRAAT 25, PO BOX 211, 1000 AE AMSTERDAM, NETHERLANDS

SN 1876-6102  
 J9 ENRGY PROCED  
 PY 2015  
 VL 75  
 BP 2839  
 EP 2845  
 DI 10.1016/j.egypro.2015.07.568  
 PG 7  
 WC Energy & Fuels; Environmental Sciences  
 SC Energy & Fuels; Environmental Sciences & Ecology  
 GA BD4SH  
 UT WOS:000361030004071  
 OA gold  
 DA 2018-05-03  
 ER

PT J

AU Brooks, E

Law, A

Huang, LJ

AF Brooks, Elizabeth

Law, Andrew

Huang, Lingjiang

TI A comparative analysis of retrofitting historic buildings for energy efficiency in the UK and China

SO DISP

LA English

DT Article

ID RESIDENTIAL BUILDINGS; REFURBISHMENT; MANAGEMENT; POLICIES

AB In the UK retrofitting, or 'retrospective refitting' has become a central strategy in reducing energy inefficiency and carbon emissions. However, whilst implementation has increased, research shows that there are still several problematic barriers to the full implementation and embedding of energy efficiency retrofit policies. Likewise, international ecological commentators, developers and policy-makers have also pointed to the growth of retrofitting ideas and policies in modernising nations such as China; however, as investigations are beginning to show, the full implementation of retrofitting practices in modernising countries is also difficult, with local policy-makers and developers showing much more interest in newbuild, as opposed to retrofitting existing buildings and/or heritage sites. Taking the UK and China as two key examples of earlier and more recent retrofitting cultures, this paper reflects on the different barriers to retrofitting historical buildings for energy efficiency in these countries and explores the potential drivers for retrofitting in each of these contexts.

C1 [Brooks, Elizabeth] Crichton Inst, Dumfries DG1 4ZL, Scotland.

[Law, Andrew] Newcastle Univ, Sch Architecture Planning & Landscape, Newcastle Upon Tyne NE1 7RU, Tyne & Wear, England.

[Huang, Lingjiang] Wuhan Univ, Dept Architecture, Wuhan 430072, Hubei Province, Peoples R China.

RP Brooks, E (reprint author), Crichton Inst, Rutherford McCowan Bldg Bankend Rd, Dumfries DG1 4ZL, Scotland.

EM Liz.Brooks@glasgow.ac.uk; andrew.law@ncl.ac.uk; huanglj@whu.edu.cn

CR Abramson DB, 2011, ENVIRON PLANN D, V29, P67, DOI 10.1068/d4707

Aygen Z., 2013, INT HERITAGE HIST BU

Bao LL, 2012, ENRG POLICY, V45, P521, DOI 10.1016/j.enpol.2012.02.065

Bonnett A, 2013, T I BRIT GEOGR, V38, P391, DOI 10.1111/j.1475-5661.2012.00531.x

Booth AT, 2012, BUILD ENVIRON, V48, P35, DOI 10.1016/j.buildenv.2011.08.016

Chan RYK, 2001, PSYCHOL MARKET, V18, P389, DOI 10.1002/mar.1013

Chen F, 2011, HABITAT INT, V35, P410, DOI 10.1016/j.habitatint.2010.11.012

Deloitte, 2010, EC CONTR VIS EC UK N

Ding G, 2013, AUSTRALASIAN J CONST, V13, P18, DOI [10.5130/ajceb.v13i2.3322, DOI 10.5130/AJCEB.V13I2.3322]

Gemmill B., 2002, GLOBAL ENV GOVERNANC

Gleeson C., 2011, EUROPEAN RETROFIT NE  
 Hoicka CE, 2014, ENER POLICY, V65, P594, DOI 10.1016/j.enpol.2013.10.053  
 Hollands R., 2008, CITY, V12, P303, DOI DOI 10.1080/13604810802479126  
 Lloyd Jones T., 2010, MUNICIPAL ENG, V163, P179, DOI [10.1680/muen.2010.163.3.179, DOI 10.1680/MUEN.2010.163.3.179]  
 Killip G, 2013, ENVIRON PLANN C, V31, P876, DOI 10.1068/c11336  
 Lin CY, 2011, J BUS ETHICS, V98, P67, DOI 10.1007/s10551-010-0535-9  
 Lubeck A, 2010, J GREEN BUILD, V5, P3, DOI 10.3992/jgb.5.3.3  
 Mansfield J, 2013, STRUCTURAL SURVEY, V31, P6, DOI [10.1108/02630801311304387, DOI 10.1108/02630801311304387]  
 Miao ZW, 2012, INT J PROD ECON, V140, P18, DOI 10.1016/j.ijpe.2011.05.030  
 Mickaityte A, 2008, INT J STRATEG PROP M, V12, P53, DOI 10.3846/1648-715X.2008.12.53-68  
 Mote Frederick W, 1973, RICE U STUD, V59, P35  
 Ouyang JL, 2011, ENER POLICY, V39, P4902, DOI 10.1016/j.enpol.2011.06.025  
 Pan T., 2005, RESTRUCTURING CHINES  
 Porritt SM, 2012, ENER BUILDINGS, V55, P16, DOI 10.1016/j.enbuild.2012.01.043  
 Power A, 2008, ENER POLICY, V36, P4487, DOI 10.1016/j.enpol.2008.09.022  
 Price L, 2011, ENER POLICY, V39, P2165, DOI 10.1016/j.enpol.2011.02.006  
 Rafaj P, 2013, MITIG ADAPT STRAT GL, V18, P801, DOI 10.1007/s11027-012-9390-6  
 Ren XF, 2008, CITY COMMUNITY, V7, P23, DOI 10.1111/j.1540-6040.2007.00239.x  
 Ryckmans Pierre, 2008, CHINA HERITAGE Q, V14  
 Schreurs M. A., 2011, OXFORD HDB CLIMATE C, P449  
 Sofield THB, 1998, ANN TOURISM RES, V25, P362, DOI 10.1016/S0160-7383(97)00092-3  
 Stern PC, 1999, J CONSUM POLICY, V22, P461, DOI DOI 10.1023/A:1006211709570  
 YISAN R, 1993, ANTIQUITY, V67, P850, DOI 10.1017/S0003598X00063833  
 Zhang J., 2012, MANAGEMENT SCI ENG, V6, P61  
 Zhang JY, 2013, GREEN POLITICS CHINA  
 Zhao HH, 2014, J CLEAN PROD, V63, P143, DOI 10.1016/j.jclepro.2013.05.021

NR 36

TC 3

Z9 3

U1 1

U2 12

PU ROUTLEDGE JOURNALS, TAYLOR &amp; FRANCIS LTD

PI ABINGDON

PA 4 PARK SQUARE, MILTON PARK, ABINGDON OX14 4RN, OXFORDSHIRE, ENGLAND

SN 0251-3625

EI 2166-8604

J9 DISP

JI disP

PD JUL 3

PY 2014

VL 50

IS 3

BP 66

EP 75

DI 10.1080/02513625.2014.979044

PG 10

WC Planning &amp; Development

SC Public Administration

GA AT8UD

UT WOS:000345206400009

DA 2018-05-03

ER

PT J

AU Scott, MJ

Daly, DS

Zhou, YY  
 Rice, JS  
 Patel, PL  
 McJeon, HC  
 Kyle, GP  
 Kim, SH  
 Eom, JY  
 Clarke, LE

AF Scott, Michael J.

Daly, Don S.  
 Zhou, Yuyu  
 Rice, Jennie S.  
 Patel, Pralit L.  
 McJeon, Haewon C.  
 Kyle, G. Page  
 Kim, Son H.  
 Eom, Jiyong  
 Clarke, Leon E.

TI Evaluating sub-national building-energy efficiency policy options under uncertainty: Efficient sensitivity testing of alternative climate, technological, and socioeconomic futures in a regional integrated-assessment model

SO ENERGY ECONOMICS

LA English

DT Article

DE Climate change; Mitigation and adaptation; Integrated-assessment; Sensitivity analysis; Design of computer experiments; Integrated-assessment modeling

ID SYSTEM MODEL; TRANSPORTATION; MITIGATION; SIMULATION; FRAMEWORK; US

AB Improving the energy efficiency of building stock, commercial equipment, and household appliances can have a major positive impact on energy use, carbon emissions, and building services. Sub-national regions such as the U.S. states wish to increase energy efficiency, reduce carbon emissions, or adapt to climate change. Evaluating sub-national policies to reduce energy use and emissions is difficult because of the large uncertainties in socioeconomic factors, technology performance and cost and energy and climate policies. Climate change itself may undercut such policies. However, assessing all of the uncertainties of large-scale energy and climate models by performing thousands of model runs can be a significant modeling effort with its accompanying computational burden. By applying fractional-factorial methods to the GCAM-USA 50-state integrated-assessment model in the context of a particular policy question, this paper demonstrates how a decision-focused sensitivity analysis strategy can greatly reduce computational burden in the presence of uncertainty and reveal the important drivers for decisions and more detailed uncertainty analysis. (C) 2014 Elsevier B.V. All rights reserved.

C1 [Scott, Michael J.; Daly, Don S.; Rice, Jennie S.] Pacific NW Natl Lab, Richland, WA 99352 USA.

[Zhou, Yuyu; Patel, Pralit L.; McJeon, Haewon C.; Kyle, G. Page; Kim, Son H.; Eom, Jiyong; Clarke, Leon E.] Univ Maryland, Pacific NW Natl Lab, Joint Global Change Res Inst, College Pk, MD 20740 USA.

RP Scott, MJ (reprint author), Pacific NW Natl Lab, POB 999, Mail Stop K6-05, Richland, WA 99352 USA.

EM michael.scott@pnnl.gov; don.daly@pnnl.gov; Yuyu.Zhou@pnnl.gov; Jennie.Rice@pnnl.gov; pralit.patel@pnnl.gov; Haewon.McJeon@pnnl.gov; pkyle@pnnl.gov; skim@pnnl.gov; Jiyong.Eom@pnnl.gov; leon.clarke@pnnl.gov

RI Eom, Jiyong/A-1161-2014

OI Eom, Jiyong/0000-0002-8092-5921

CR BECP (Building Energy Codes Program), 2012, BUILD EN COD

CEC (California Energy Commission), 2010, CEC4002010012

Clarke L., 2008, PNNL18075

Collins WD, 2006, J CLIMATE, V19, P2122, DOI 10.1175/JCLI3761.1

Crawley D. B., 2008, J BUILD PERFORM SIMU, P91

DOE, 2012, 2011 BUILD EN DAT BO

DOE (U.S. Department of Energy), 2012, BUILD TECHN PROGR AP

DOE (U. S. Department of Energy), 2012, ENERGYPLUS EN SIM SO



Edmonds J, 2004, ENER E CON, V26, P517, DOI 10.1016/j.eneco.2004.04.025  
 Edmonds J.A., 2012, INTEGRATED ASSESSMEN, P169  
 Gassman P.W., 2005, 05WP397 IOW STAT U C  
 Gordon C, 2000, CLIM DYNAM, V16, P147, DOI 10.1007/s003820050010  
 IPCC-DDC (Intergovernmental Panel on Climate Change Data Distribution Centre), 2011, CARB DIOX  
 PROJ EM CO  
 Kim SH, 2006, ENER G J, P63  
 Kleijnen JPC, 2005, EUR J OPER RES, V164, P287, DOI 10.1016/j.ejor.2004.02.005  
 Kneifel J., 2009, ENER G BUILDINGS, V42, P333  
 Kyle P, 2010, ENER G J, V31, P145  
 Lemoine D, 2013, ENVIRON RES LETT, V8, DOI 10.1088/1748-9326/8/3/034019  
 McKinsey & Company, 2009, UNL EN EFF US EC  
 Mcleon H.C., 2011, ENER G ECON, V33, P619  
 Montgomery D. C., 2012, DESIGN ANAL EXPT  
 MORRIS MD, 1991, TECHNOMETRICS, V33, P161, DOI 10.2307/1269043  
 Murphy R, 2011, ENER G POLICY, V39, P7146, DOI 10.1016/j.enpol.2011.08.033  
 Nakicenovic N., 2000, IPCC SPECIAL REPORT, P570  
 NIST/SEMATECH, 2012, E HDB STAT METH  
 Reilly J., 1987, ENERGY J, V8, P1  
 Rice JS, 2012, MITIG ADAPT STRAT GL, V17, P805, DOI 10.1007/s11027-011-9345-3  
 Russell GL, 2000, J GEOPHYS RES-ATMOS, V105, P14891, DOI 10.1029/2000JD900156  
 Scott MJ, 1999, ENER G POLICY, V27, P855, DOI 10.1016/S0301-4215(99)00057-9  
 Cort K.A., 2007, ENERGY, V26, P645  
 Scott M. J., 2008, EFFECTS CLIMATE CHAN, P7  
 Sobol IM, 2001, MATH COMPUT SIMULAT, V55, P271, DOI 10.1016/S0378-4754(00)00270-6  
 Urge-Vorsatz D, 2008, ENER G POLICY, V36, P642, DOI 10.1016/j.enpol.2007.10.009  
 UN Population Division (United Nations Secretariat Department of Economic and Social Affairs  
 Population Division), 2009, ASS UND 2008 REV L S  
 \*US CENS BUR, 2005, STAT INT POP PROJ AG  
 U. S. Census Bureau, 2008, 2008 NAT POP PROJ  
 U.S. EIA, 2011, EM GREENH GAS US 200  
 Wilbanks T. B., 2012, CLIMATE CHANGE ENER G  
 Williams J. R., 1995, Computer models of watershed hydrology., P909  
 Yaesoubi R.A., 2007, THESIS N CAROLINA ST  
 Zhou YY, 2014, APPL ENER G, V113, P1077, DOI 10.1016/j.apenergy.2013.08.034  
 Zhou YY, 2013, CLIMATIC CHANGE, V119, P979, DOI 10.1007/s10584-013-0772-x

NR 42

TC 3

Z9 3

U1 0

U2 19

PU ELSEVIER SCIENCE BV

PI AMSTERDAM

PA PO BOX 211, 1000 AE AMSTERDAM, NETHERLANDS

SN 0140-9883

EI 1873-6181

J9 ENER G ECON

JI Energy Econ.

PD MAY

PY 2014

VL 43

BP 22

EP 33

DI 10.1016/j.eneco.2014.01.012

PG 12

WC Economics

SC Business &amp; Economics

GA AH4PI

UT WOS:000336110100004  
 DA 2018-05-03  
 ER

PT S

AU Ghadi, YY

Rasul, MG

Khan, MMK

AF Ghadi, Yazeed Yasin

Rasul, M. G.

Khan, M. M. K.

BE Yan, J

Lee, DJ

Chou, SK

Desideri, U

Li, H

TI Potential of Saving Energy Using Advanced Fuzzy Logic Controllers in  
 Smart Buildings in Subtropical Climates in Australia

SO INTERNATIONAL CONFERENCE ON APPLIED ENERGY, ICAE2014

SE Energy Procedia

LA English

DT Proceedings Paper

CT 6th International Conference on Applied Energy (ICAE)

CY MAY 30-JUN 02, 2014

CL Taipei, TAIWAN

DE Subtropical; Building management Systems (BMS); Controllers; Fuzzy base  
 controllers

ID MODEL

AB Subtropical Regions in Australia are associated with high demand for air conditioning throughout the long Summer which leads to a high energy consumption and consequently high greenhouse gas (GHG) emissions which has a high negative impact on the environment. Using conventional controllers in Building Management Systems (BMS) whose functions are based on ON/OFF, temperature control and in some cases humidity control is not the ultimate solution to save energy. The reason behind the above fact is that, conventional controllers do not take into account real time events such as the number of occupants, indoor air quality (IAQ), natural light illuminations and etc dislike Fuzzy logic based controllers. In the last decade there is a high interest in researching Fuzzy logic based controllers as they have the ability to save energy while maintaining indoor comfort level. In this article a general review on Fuzzy logic based controllers is presented, focusing on the role of technology in saving energy, and its potential in subtropical Central Queensland, Australia. The issues of past and present techniques are highlighted and discussed accordingly. Crown Copyright (C) 2014 Published by Elsevier Ltd. This is an open access article under the CC BY-NC-ND license (<http://creativecommons.org/licenses/by-nc-nd/3.0/>).

C1 [Ghadi, Yazeed Yasin; Rasul, M. G.; Khan, M. M. K.] Cent Queensland Univ, Sch Engn & Technol, Rockhampton, Qld 4702, Australia.

RP Ghadi, YY (reprint author), Cent Queensland Univ, Sch Engn & Technol, Rockhampton, Qld 4702, Australia.

EM y.ghadi@cqu.edu.au

CR Birle S, 2013, FOOD CONTROL, V29, P254, DOI 10.1016/j.foodcont.2012.06.011

Gorgulu S., 2013, ENERGY BUILDINGS

Homod RZ, 2013, ENERGBUILDINGS, V60, P310, DOI 10.1016/j.enbuild.2012.10.034

La D, 2011, SOL ENERGY, V85, P2997, DOI 10.1016/j.solener.2011.08.039

Lu X, 2014, APPL ENERGB, V114, P91

Mambo A.D., 2013, OCCUPANCY DRIVEN SUP

Page J, 2008, ENERGBUILDINGS, V40, P83, DOI 10.1016/j.enbuild.2007.01.018

Pandey S, 2012, APPL SOFT COMPUT, V12, P1214, DOI 10.1016/j.asoc.2011.10.011

The Solar Energy Laboratory at University of Wisconsin-Madison, 2006, TRNSYS 16, V3

Song Y., 2013, INT J LOW CARBON TEC

Wijayasekara D., 2013, RES CONTR SYST ISRCS

NR 11

TC 3  
 Z9 3  
 U1 0  
 U2 4  
 PU ELSEVIER SCIENCE BV  
 PI AMSTERDAM  
 PA SARA BURGERHARTSTRAAT 25, PO BOX 211, 1000 AE AMSTERDAM, NETHERLANDS  
 SN 1876-6102  
 J9 ENRGY PROCED  
 PY 2014  
 VL 61  
 BP 290  
 EP 293  
 DI 10.1016/j.egypro.2014.11.1110  
 PG 4  
 WC GREEN & SUSTAINABLE SCIENCE & TECHNOLOGY; Energy & Fuels  
 SC Science & Technology - Other Topics; Energy & Fuels  
 GA BE7UT  
 UT WOS:000375936100069  
 OA gold  
 DA 2018-05-03  
 ER

PT J  
 AU Mekhilef, S  
     Saidur, R  
     Said, SM  
     Hong, PH  
     Islam, MR  
 AF Mekhilef, S.  
     Saidur, R.  
     Said, S. M.  
     Hong, P. H.  
     Islam, M. R.

TI Techno-economic evaluation of energy efficiency measures in high rise residential buildings in Malaysia

SO CLEAN TECHNOLOGIES AND ENVIRONMENTAL POLICY

LA English

DT Article

DE High rise building; Energy savings; Lighting energy

ID EXERGY ANALYSIS; SECTOR; INDUSTRIES; SAVINGS; DESIGN

AB In this paper, a survey was conducted on a residential condominium to estimate energy use by different household appliances along the lighting energy estimation in public areas. It has been found that about 2.17 GWh of energy is used in the condominium annually by different types of household appliances and lightings in public areas. As there is significant potential to reduce the energy used, different energy savings measures have been applied and energy savings, bill savings, life cycle cost analysis have been estimated and presented in this paper. It has been found that a cumulative amount of 2.4 GWh of energy can be saved for about 10 years with the implementation of different energy savings strategies proposed for appliances and lighting in public areas. However, good maintenance practices and good energy management practices should be employed continuously to maintain high energy efficiency and high performance of the equipment used and the entire building. It has been found that some of the measures like reducing air conditioning load and reducing heat gain through window tinting are economically very viable as payback period is very short. More advantageously, some of the measures can be implemented without investing significant cost. Ultimately, a key driver in the success of energy efficiency is the education and attitude of the stakeholders in the building industry, and end users who are committed to practice energy saving measures.

C1 [Mekhilef, S.; Said, S. M.] Univ Malaya, Dept Elect Engn, Kuala Lumpur 50603, Malaysia.

- [Saidur, R.; Hong, P. H.; Islam, M. R.] Univ Malaya, Fac Engr, Dept Mech Engr, Kuala Lumpur 50603, Malaysia.
- RP Islam, MR (reprint author), Univ Malaya, Fac Engr, Dept Mech Engr, Kuala Lumpur 50603, Malaysia.  
EM mrislam007@gmail.com
- RI Islam, Rafiqul/E-4707-2011; Saidur, Rahman/B-7776-2010; MOHD SAID, SUHANA/B-9852-2010; Mekhilef, Saad/B-9652-2010
- OI Islam, Rafiqul/0000-0002-5868-1393; Saidur, Rahman/0000-0002-2656-3034; MOHD SAID, SUHANA/0000-0001-5258-9070; Mekhilef, Saad/0000-0001-8544-8995
- FU [UM.C/HIR/MOHE/ENG/24]
- FX The authors would like to acknowledge the HIR-MOHE Project. The research has been carried out under the Project No. UM.C/HIR/MOHE/ENG/24.
- CR Adhikari RS, 2012, ENRGY PROCED, V14, P1331, DOI 10.1016/j.egypro.2011.12.1097
- AER, 2011, ANN EN REV 2011 US I
- Alanne K, 2010, ENERG CONVERS MANAGE, V51, P2635, DOI 10.1016/j.enconman.2010.05.029
- Andreja N, 2012, CLEAN TECHNOL ENVIR, DOI [10.1007/s10098-012-0457-6, DOI 10.1007/S10098-012-0457-6]
- Dineen D, 2011, ENERG BUILDINGS, V43, P166, DOI 10.1016/j.enbuild.2010.09.004
- FCA, 2007, BEST PRACT EN EFF
- Harvey LDD, 2009, ENER EFFIC, V2, P139, DOI 10.1007/s12053-009-9041-2
- Islam MR, 2012, ENER EDUC SCI TECH-A, V29, P611
- Islam MR, 2011, ENERGY, V36, P985, DOI 10.1016/j.energy.2010.12.011
- Iwano J, 2010, ENER POLICY, V38, P7744, DOI 10.1016/j.enpol.2010.08.027
- Kavgic M, 2010, BUILD ENVIRON, V45, P1683, DOI 10.1016/j.buildenv.2010.01.021
- Kaynakli O, 2012, RENEW SUST ENER REV, V16, P415, DOI 10.1016/j.rser.2011.08.006
- Klemes JJ, 2012, CLEAN TECHNOL ENVIR, V14, P371, DOI 10.1007/s10098-012-0484-3
- Laura I, 2003, GUIDE COMPUTING REPO, P6968
- LEO, 2012, EN PERF LEO BUILD
- Lijing G., 2008, BUILD SIMUL, V1, P169
- Madloul NA, 2012, RENEW SUST ENER REV, V16, P921, DOI 10.1016/j.rser.2011.09.013
- Mahlia TMI, 2005, ENER BUILDINGS, V37, P573, DOI 10.1016/j.enbuild.2004.08.009
- Mahlia TMI, 2003, ENERGY, V28, P751, DOI 10.1016/S0360-5442(02)00190-1
- Mahlia TMI, 2002, ENER CONVERS MANAGE, V43, P2509, DOI 10.1016/S0196-8904(01)00188-1
- Mekhilef S, 2012, RENEW SUST ENER REV, V16, P2920, DOI 10.1016/j.rser.2012.02.012
- Mekhilef S, 2012, RENEW SUST ENER REV, V16, P981, DOI 10.1016/j.rser.2011.09.020
- Mekhilef S, 2011, RENEW SUST ENER REV, V15, P3360, DOI 10.1016/j.rser.2011.04.016
- Mekhilef S, 2011, RENEW SUST ENER REV, V15, P1777, DOI 10.1016/j.rser.2010.12.018
- Muluku Y, 2012, CLEAN TECHNOL ENVIR, DOI [10.1007/s10098-012-0481-6, DOI 10.1007/S10098-012-0481-6]
- Ouyang JL, 2009, ENER POLICY, V37, P140, DOI 10.1016/j.enpol.2008.07.041
- Radhi H, 2011, ENER BUILDINGS, V43, P2086, DOI 10.1016/j.enbuild.2011.04.018
- Saari A, 2012, APPL ENER, V92, P76, DOI 10.1016/j.apenergy.2011.10.029
- Saidur R, 2007, ENER POLICY, V35, P1648, DOI 10.1016/j.enpol.2006.05.006
- Saidur R, 2007, ENER POLICY, V35, P1050, DOI 10.1016/j.enpol.2006.02.006
- Saidur R, 2011, RENEW SUST ENER REV, V15, P2487, DOI 10.1016/j.rser.2011.01.020
- Saidur R, 2011, RENEW SUST ENER REV, V15, P2073, DOI 10.1016/j.rser.2011.01.008
- Saidur R, 2010, RENEW SUST ENER REV, V14, P1744, DOI 10.1016/j.rser.2010.03.007
- Saidur R, 2010, APPL ENER, V87, P2746, DOI 10.1016/j.apenergy.2009.12.018
- Saidur R, 2010, RENEW SUST ENER REV, V14, P877, DOI 10.1016/j.rser.2009.10.018
- Saidur R, 2009, ENER POLICY, V37, P4104, DOI 10.1016/j.enpol.2009.04.052
- Siwei L., 1993, ENERGY, V18, P871
- Tang C, 2005, DANISH ENV COOPERATI
- Tetsu K, 2006, 7 INT SEM SUST ENV A, P1
- Tomislav P, 2012, CLEAN TECHNOL ENVIR, DOI [10.1007/s10098-012-0460-y, DOI 10.1007/S10098-012-0460-Y]
- V-Kool, 2012, VKOOL FRANCH INT PTE
- Verbeeck G, 2005, ENER BUILDINGS, V37, P747, DOI 10.1016/j.enbuild.2004.10.003
- Yildiz Y, 2012, APPL ENER, V93, P337, DOI 10.1016/j.apenergy.2011.12.048

Zhou L, 2012, CLEAN TECHNOL ENVIR, V14, P789, DOI 10.1007/s10098-012-0454-9  
 NR 44  
 TC 3  
 Z9 3  
 U1 1  
 U2 16  
 PU SPRINGER  
 PI NEW YORK  
 PA 233 SPRING ST, NEW YORK, NY 10013 USA  
 SN 1618-954X  
 EI 1618-9558  
 J9 CLEAN TECHNOL ENVIR  
 JI Clean Technol. Environ. Policy  
 PD JAN  
 PY 2014  
 VL 16  
 IS 1  
 BP 23  
 EP 35  
 DI 10.1007/s10098-013-0587-5  
 PG 13  
 WC GREEN & SUSTAINABLE SCIENCE & TECHNOLOGY; Engineering, Environmental;  
 Environmental Sciences  
 SC Science & Technology - Other Topics; Engineering; Environmental Sciences  
 & Ecology  
 GA 298RF  
 UT WOS:000330341300005  
 DA 2018-05-03  
 ER

PT S  
 AU Peruzzini, M  
 Germani, M  
 Papetti, A  
 Capitanelli, A  
 AF Peruzzini, Margherita  
 Germani, Michele  
 Papetti, Alessandra  
 Capitanelli, Andrea  
 BE CamarinhaMatos, LM  
 Scherer, RJ  
 TI Smart Home Information Management System for Energy-Efficient Networks  
 SO COLLABORATIVE SYSTEMS FOR REINDUSTRIALIZATION  
 SE IFIP Advances in Information and Communication Technology  
 LA English  
 DT Proceedings Paper  
 CT 14th IFIP WG 5.5 Working Conference on Virtual Enterprises (PROVE-VE)  
 CY SEP 30-OCT 02, 2013  
 CL Dresden, GERMANY  
 SP IFIP WG 5 5 Co Operat Infrastructure Virtual Enterprises & Electronic Business, Soc Collaborat Networks,  
 Tech Univ Dresden, New Univ Lisbon, UNINOVA  
 DE Energy-efficient networks; Interoperable smart home systems (SHS);  
 Internet of Things (IoT); Virtual Enterprise (VE); Energy-control  
 services  
 ID DESIGN  
 AB Energy efficiency of smart ]home systems imposes the intelligent management of a huge quantity of data  
 and the collaboration between multiple stakeholders. Indeed, thanks to recent developments in ICT  
 (Information and Communication Technologies) and IoT (Internet of Things), it is possible to achieve

higher performances and offer new energy-control services. However, data must be not only retrieved but also translated into significant information and related to interoperable tasks. This paper focuses on smart home energy control and defines a methodology to improve smart home information management in order to create an extended energy-efficient network comprehending the distributed manufacturing enterprise as well as the energy utility and the consumers. The case study focuses on a sub-set of interoperable smart devices and shows how to apply the proposed information management model to make an extended virtual enterprise provide energy-control services.

- C1 [Peruzzini, Margherita; Germani, Michele; Papetti, Alessandra; Capitanelli, Andrea] Univ Politecn Marche, Via Brece Bianche 12, I-60131 Ancona, AN, Italy.  
 RP Peruzzini, M (reprint author), Univ Politecn Marche, Via Brece Bianche 12, I-60131 Ancona, AN, Italy.  
 EM m.peruzzini@univpm.it; m.germani@univpm.it  
 OI Germani, Michele/0000-0003-1988-8620; Peruzzini, Margherita/0000-0003-2260-0392
- CR Alam MR, 2012, IEEE T SYST MAN CY C, V42, P1190, DOI 10.1109/TSMCC.2012.2189204  
 Bansal P, 2011, APPL THERM ENG, V31, P3748, DOI 10.1016/j.applthermaleng.2011.07.023  
 Bonino D, 2012, ENERG BUILDINGS, V47, P383, DOI 10.1016/j.enbuild.2011.12.017  
 Byrne JA, 1993, BUSINESS WEEK FEB, V8, P36  
 Chen CY, 2009, IEEE INTL CONF IND I, P273, DOI 10.1109/INDIN.2009.5195816  
 Cheng ST, 2012, EXPERT SYST APPL, V39, P12418, DOI 10.1016/j.eswa.2012.04.077  
 Chesbrough H., 2003, OPEN INNOVATION  
 Germani M., 2010, P ASME WORLD C INN V  
 Germani M, 2010, IFIP ADV INF COMM TE, V336, P577  
 Kailas A, 2012, J COMPUTER NETWORKS  
 Kim S.L., 2011, P COMPUTER SCI, V5, P794  
 Mengoni M., 2010, P 9 INT C TOOLS METH, V1, P461  
 Perumal T., 2010, ATLANTIS AMBIENT PER, V2, P141  
 Ricci A., 2005, P INT S POW LIN COMM, P300  
 Shin JH, 2012, PROCEDIA COMPUT SCI, V10, P197, DOI 10.1016/j.procs.2012.06.028  
 Wong JKW, 2005, AUTOMAT CONSTR, V14, P143, DOI 10.1016/j.autcon.2004.06.001
- NR 16  
 TC 3  
 Z9 3  
 U1 0  
 U2 0  
 PU SPRINGER-VERLAG BERLIN  
 PI BERLIN  
 PA HEIDELBERGER PLATZ 3, D-14197 BERLIN, GERMANY  
 SN 1868-4238  
 BN 978-3-642-40543-3; 978-3-642-40542-6  
 J9 IFIP ADV INF COMM TE  
 PY 2013  
 VL 408  
 BP 393  
 EP 401  
 PG 9
- WC Computer Science, Information Systems; Computer Science, Interdisciplinary Applications; Engineering, Industrial; Operations Research & Management Science  
 SC Computer Science; Engineering; Operations Research & Management Science  
 GA BG7AP  
 UT WOS:000391134800042  
 DA 2018-05-03  
 ER
- PT J  
 AU Senatla, M  
 AF Senatla, Mamahloko  
 TI Energy demand projections and relevance of income dynamics in Gauteng's

residential sector

SO JOURNAL OF ENERGY IN SOUTHERN AFRICA

LA English

DT Article

DE LEAP; final energy demand; income dynamics; scenarios; household mobility

ID EFFICIENCY

AB Energy modelling serves as a crucial tool for informing both energy policy and strategy development. But the modelling process is faced with both sectoral energy data and structural challenges. Among all the sectors, the residential sector usually presents a huge challenge to the modelling profession due to the dynamic nature of the sector. The challenge is brought by the fact that each an every household in a region may have different energy consumption characteristics and the computing power of the available models cannot incorporate all the details of individual household characteristics. Even if there was enough computing power within the models, energy consumption is collected through surveys and as a result only a sample of a region is captured. These challenges have forced energy modellers to categorise households that have similar characteristics. Different researchers choose different methods for categorising the households. Some researchers choose to categorise households by location and climate, others choose housing types while others choose quintiles. Currently, there is no consensus on which categorisation method takes precedence over others.

In these myriad ways of categorising households, the determining factor employed in each method is what is assumed to be the driver of energy demand in that particular area of study. Many researchers acknowledge that households' income, preferences and access to certain fuels determine how households use energy. Although many researchers recognise that income is the main driver of energy demand in the residential sector, there has been no energy modelling study that has tried to categorise households by income in South Africa. This paper chose to categorise households by income because income is taken to be the main driver of energy demand in the urban residential sector. Gauteng province was chosen as a case study area for this paper. The Long-range Energy Alternatives Planning System (LEAP) is used as a tool for such analysis.

This paper will further reveal how the dynamics of differing income across the residential sector affects total energy demand in the long run. The households in Gauteng are classified into three income categories high, middle and low income households. In addition to different income categories, the paper further investigates the energy demand of Gauteng's residential sector under three economic scenarios with five energy demand scenarios. The three economic scenarios are first economic scenario (ECO1), second economic scenario (ECO2) and third economic scenario (ECO3). The most distinguishing factor between these economic scenarios is the mobility of households from one income band to the next.

The model results show that electricity demand will be high in all the three economic scenarios. The reason for such high electrical energy demand in all the economic scenarios compared to other fuels is due to the fact that among all the provinces, Gauteng households have one of the highest electricity consumption profiles. ECO2 showed the highest energy demand in all the five energy demand scenarios. This is due to the fact that the share of high income households in ECO2 was very high, compared to the other two economic scenarios. The favourable energy demand scenarios will be the Energy Efficiency and MEPS scenarios due to their ability to reduce more energy demand than other scenarios in all the three economic scenarios.

C1 Univ Cape Town, Energy Res Ctr, Syst Anal & Planning Grp, ZA-7701 Rondebosch, South Africa.

RP Senatla, M (reprint author), Univ Cape Town, Energy Res Ctr, Syst Anal & Planning Grp, Private Bag X3, ZA-7701 Rondebosch, South Africa.

EM mh.senatla@uct.ac.za

OI Senatla, Mamahloko/0000-0002-1640-6123

CR AFRANEOKESE Y, 1998, DOMESTIC ENERGY USE

AMOETANG YA, 2007, FAMILIES HOUSEHOLDS

\*COJ, 2007, CIT JOH STAT EN REP

COWAN B, 2005, BARRIERS MODERN ENER

\*CTMMSOE, 2006, CIT TSWAN METR MUN S

Department of Minerals and Energy (DME), 2005, EN EFF STRAT REP S A

DZIOUBINSKI O, 1999, PRODUCTION HOUSEHOLD

\*EMMSOE, 2004, EK METR MUN STAT EN

Fields G., 2009, INCOME MOBILITY GENE

Hair J. F., 2005, ESSENTIALS BUSINESS

HUGHES A, 2007, CLEAN ENERGY DEV S A, V1  
 HUGHES A, 2007, CLEAN ENERGY DEV S A, V3  
 HUGHES A, 2007, CLEAN ENERGY DEV S A, V2  
 Hunt LC, 2003, ENERG ECON, V25, P93, DOI 10.1016/S0140-9883(02)00072-5  
 ISAAC MPM, 2008, MODELLING GLOBAL RES  
 LANDAU L. B., 2008, MIGRATION STUDIES WO  
 Louw K., 2008, ENERG POLICY, V36, P2814  
 Mathews EH, 1996, ENERG BUILDINGS, V24, P117, DOI 10.1016/0378-7788(96)82432-7  
 METH C, 2008, SOCIAL INCOME S AFRI  
 Nadel S, 2002, ANNU REV ENERG ENV, V27, P159, DOI 10.1146/annurev.energy.27.122001.083452  
 PRASAD G, 2006, ENERGY POLICIES SUST  
 RAUT LK, 1996, SIGNALLING EQUILIBRI  
 \*SARB, 2003, S AFR RES BANK ANN E  
 StatsSA, 2007, COMM SURV 2007 BAS R  
 \*STATSSA, 2001, CENS 2001 DAT  
 \*STATSSA, 2007, LAB FORC SURV 2007 S  
 WADE J, 2003, ENERGY EFFICIENCIES  
 WARD S, 2008, GAUTENG 2034 DEV STR  
 WHITE C, 1998, SOCIAL DETERMINANTS  
 WILKENFELD G, 1997, ENERG BUILDINGS, V22, P81  
 WINKLER H, 2006, THESIS U CAPE TOWN  
 World Bank, 2008, WELF IMP RUR EL REAS  
 [Anonymous], 2008, ENG NEWS ONLINE  
 NR 33  
 TC 3  
 Z9 3  
 U1 1  
 U2 8  
 PU UNIV CAPE TOWN, ENERGY RES CENTRE  
 PI RONDEBOSCH  
 PA PRIVATE BAG, 6TH FLR, MENZIES BLDG, UPPER CAMPUS, RM 6 46, RONDEBOSCH,  
 7701, SOUTH AFRICA  
 SN 1021-447X  
 J9 J ENERGY SOUTH AFR  
 JI J. Energy South. Afr.  
 PD NOV  
 PY 2011  
 VL 22  
 IS 4  
 BP 31  
 EP 47  
 PG 17  
 WC Energy & Fuels  
 SC Energy & Fuels  
 GA 868HP  
 UT WOS:000298514600004  
 DA 2018-05-03  
 ER  
  
 PT S  
 AU Murakami, Y  
 Terano, M  
 Obayashi, FT  
 Honma, M  
 AF Murakami, Yoshifumi  
 Terano, Masaaki  
 Obayashi, Fun-Tiaki  
 Honma, Mutuo



BE Smith, MJ

Salvendy, G

TI Development of cooperative building controller for energy saving and comfortable environment

SO HUMAN INTERFACE AND THE MANAGEMENT OF INFORMATION: INTERACTING IN INFORMATION ENVIRONMENTS, PT 2, PROCEEDINGS

SE Lecture Notes in Computer Science

LA English

DT Proceedings Paper

CT Symposium on Human Interface and the Management of Information held at HCI International 2007

CY JUL 22-27, 2007

CL Beijing, PEOPLES R CHINA

DE energy saving; cooperative control; venetian blind

AB The purpose of automatic controllers for building services (air conditioning system, lighting and blinds system) is to save energy in the whole building while keeping occupants' comfort. Nevertheless, most of automatic controllers don't optimally operate from the viewpoint of total energy efficiency and occupants' satisfactions. The main reason is that each controller operates, neglecting states of other controllers and therefore, control point of each controller always doesn't correspond to best control point in the whole building system. In this study, we propose an innovative controller that communicates with other controllers to control building equipments optimally from the viewpoint of total energy efficiency and occupants' satisfactions. The developed controller functions as an agent in the control system, which can voluntarily collect available information from other controllers and decide set points to enhance total efficiency in cooperation with one another. Therefore, this controller is called as "cooperative controller". Several types of cooperative controllers have been developed and experimentally applied to an actual building located in Japan (Sogo et. al. 2002, Honma et. al. 2002, Terano et. al. 2002). In this paper, cooperative control using daylight, major example in series of cooperative control system, is reported. Daylight is useful to reduce energy consumption of lighting, however, it has not been widely used. The main reason is that as incoming daylight has complex effects on thermal and visual environment, it is difficult to optimally control amount of daylight. To solve this problem, we propose cooperative control system that can control amount of daylight effectively to optimize total energy efficiency and occupants' comfort. A series of numerical experiments was conducted to confirm effect of cooperative control system on improvement of total energy efficiency and indoor environment. The results showed that this cooperative control system could save energy use rate of almost 10% compared with no cooperative control system. In addition, in order to use in practice, cooperative controller is designed to apply an actual building easily and keep stability even in the other controllers' troubles.

C1 [Murakami, Yoshifumi; Terano, Masaaki; Obayashi, Fun-Tiaki] Matsushita Elect Ind Co Ltd, New Prod Technol Dev Dept, 1048 Kadoma, Osaka 5718686, Japan.

[Honma, Mutuo] Nikken Sekki Ltd, Tokyo, 1028117, Japan.

RP Murakami, Y (reprint author), Matsushita Elect Ind Co Ltd, New Prod Technol Dev Dept, 1048 Kadoma, Osaka 5718686, Japan.

EM y\_murakami@mail.mew.co.jp; terano@mail.mew.co.jp;

obayashi@mail.mew.co.jp; honmam@nikken.co.jp

CR ASHRAE, 1995, ANSI ASHRAE STANDARD, P135

Fanger P.O., 1970, THERMAL COMFORT

HONMA M, 2002, EVALUATION TOWARDS C, P321

IWATA, 1992, J ARCHIT PLANN ENV E, P439

IWATA, 1992, J ARCHIT PLANN ENV E, P432

IWATA, 1996, J ARCHIT PLANN ENV E, V489, P17

SHUKUYA M, 1979, J ARCHIT ENV

SHUKUYA M, 1982, J ARCHIT ENV

SOGO T, 2002, COOPERATIVE CONTROL, P323

TERANO M, 2002, ANAL CURRENT SITUATI, P325

NR 10

TC 3

Z9 3

U1 0

U2 1

PU SPRINGER-VERLAG BERLIN  
 PI BERLIN  
 PA HEIDELBERGER PLATZ 3, D-14197 BERLIN, GERMANY  
 SN 0302-9743  
 BN 978-3-540-73353-9  
 J9 LECT NOTES COMPUT SC  
 PY 2007  
 VL 4558  
 BP 1078  
 EP +  
 PG 2  
 WC Computer Science, Information Systems; Computer Science, Theory &  
 Methods; Telecommunications  
 SC Computer Science; Telecommunications  
 GA BGM91  
 UT WOS:000248534500118  
 DA 2018-05-03  
 ER

PT J  
 AU Granderson, J  
 Agogino, A  
 AF Granderson, J  
 Agogino, A  
 TI Intelligent office lighting: Demand-responsive conditioning and  
 increased user satisfaction

SO LEUKOS

LA English

DT Article

DE daylighting; energy efficiency; influence diagrams; intelligence; demand  
 response; user satisfaction; wireless sensing and actuating

AB Commercial daylighting systems have been shown to save up to 45 percent in electricity consumption when properly commissioned, and installed in areas with significant amounts of daylight. In practice however, these systems are greatly under-leveraged. This paper details the development of an intelligent commercial lighting system designed to overcome user dissatisfaction, lost energy savings due to simple control algorithms, and high retrofit costs. An influence diagram decision framework is used to optimize demand responsive actuation decisions, resulting in improvements in user satisfaction and energy efficiency compared to existing daylighting systems. Further, the system utilizes wireless sensing and actuating technology to relieve much of the expense associated with retrofitting.

C1 Univ Calif Berkeley, Dept Mech Engr, Berkeley, CA 94720 USA.

RP Granderson, J (reprint author), Univ Calif Berkeley, Dept Mech Engr, Berkeley, CA 94720 USA.

EM jgranderson@me.berkeley.edu; agogino@berkeley.edu

CR Akashi Y., 2004, J ILLUM ENG SOC, V33, P3

Bradburn N. M., 2004, ASKING QUESTIONS DEF

CHANG S, 2002, J ILLUM ENG SOC N AM, V32, P147

Escuyer S., 2001, Lighting Research and Technology, V33, P77, DOI 10.1177/136578280103300202

Frazer L., 2000, QUESTIONNAIRE DESIGN

Illuminating Engineering Society of North America, 1993, LIGHT HDB REF APPL

JENNINGS D, 2000, J ILLUM ENG SOC, V29, P63

KOLOKATSA D, ENERGY BUILD, V33, P531

KRYSZCZUK K, 2001, ILL ENG SOC N AM C P, P315

LI DHW, 2000, ENERGY BUILD, V33, P793

Moore T., 2003, Lighting Research & Technology, V35, P43, DOI 10.1191/1477153503li061oa

Newsham G.R., 2002, ILL ENG SOC N AM C P, P115

NEWSHAM V, 2004, CONSTRUCTION TECHNOL, V62

OROURKE C, 1999, 62 NAT LIGHT PROD IN

Pearl J., 1995, HDB BRAIN THEORY NEU, P149

PIETTE MA, 2000, ENERGY BUILD, V33, P783

To D. W. T., 2002, LIGHTING RES TECHNOL, V34, P121  
 Vine E, 1998, ENERGBUILDINGS, V28, P205, DOI 10.1016/S0378-7788(98)00023-1  
 WEN YJ, 2004, P ASME INT MECH ENG

NR 19

TC 3

Z9 3

U1 0

U2 2

PU ILLUMINAT ENG SOC NORTH AMER

PI NEW YORK

PA 120 WALL ST, 17TH FL, NEW YORK, NY 10005-4001 USA

SN 1550-2724

J9 LEUKOS

JI Leukos

PD JAN

PY 2006

VL 2

IS 3

BP 185

EP 198

DI 10.1582/LEUKOS.2006.02.03.003

PG 14

WC Construction & Building Technology; Optics

SC Construction & Building Technology; Optics

GA 038SY

UT WOS:000237247900004

DA 2018-05-03

ER

PT J

AU Johnsen, TA

Unander, FF

AF Johnsen, TA

Unander, FF

TI Norwegian residential energy demand: Coordinated use of a system  
 engineering and a macroeconomic model

SO MODELING IDENTIFICATION AND CONTROL

LA English

DT Article

DE energy; economy; general equilibrium model; linear programming model

AB In Norway, the system engineering model MARKAL and the macroeconomic model MSG-EE are both used in studies of national CO<sub>2</sub> controlling strategies, MARKAL is a linear programming model that calculates a composite set of technologies necessary to meet demand and environmental constraints at minimised total energy expenditure. MSG-EE is an applied general equilibrium model including the link between economic activity, energy demand and emissions to air. MSG-EE has a theory consistent description of the link between income, prices and energy demand, but the representation of technological improvements is simple. MARKAL has a sophisticated description of future energy technology options, but includes no feedback to the general economy. A project for studying the potential for a coordinated use of these two models was initiated and funded by the Norwegian Research Council (NFR). This paper gives a brief presentation of the two models. Results from independent model calculations show that MARKAL gives a significant lower residential energy demand than MSG-EE does. This is explained by major differences in modelling approach. A first attempt of coordinating the residential energy demand in the models is reported. This attempt shows that implementing results from MARKAL in MSG-EE for the residential sector alone gives little impact on the general economy. A further development of an iteration procedure between the models should include all energy using sectors.

C1 INST ENERGITEKNIKK,N-2007 KJELLER,NORWAY.

RP Johnsen, TA (reprint author), STAT NORWAY,POB 8131,N-0033 OSLO,NORWAY.

CR AASNESS J, 1993, CONSUMER DEMAND GENE

FISHBONE LG, 1983, 51701 BNL  
 HOFFMANN KC, 1977, BELL J EC, V8  
 Johansen L., 1960, MULTISECTORAL STUDY  
 Manne A.S., 1992, BNL47161  
 MOUM K, 1992, 923 KLOKT  
 UNANDER F, 1993, IFEKRE92008 I EN

NR 7

TC 3

Z9 3

U1 0

U2 3

PU MIC

PI TRONDHEIM

PA DIV ENG CYBERNETICS, 7034 TRONDHEIM, NORWAY

SN 0332-7353

J9 MODEL IDENT CONTROL

JI Model. Identif. Control

PD JUL

PY 1996

VL 17

IS 3

BP 183

EP 192

DI 10.4173/mic.1996.3.2

PG 10

WC Automation & Control Systems; Computer Science, Cybernetics

SC Automation & Control Systems; Computer Science

GA VJ378

UT WOS:A1996VJ37800002

OA gold

DA 2018-05-03

ER

PT J

AU De Lauretis, S

Gheri, F

Cayla, JM

AF De Lauretis, Simona

Gheri, Frederic

Cayla, Jean-Michel

TI Energy consumption and activity patterns: An analysis extended to total time and energy use for French households

SO APPLIED ENERGY

LA English

DT Article

DE Time use; Household consumption; Energy consumption; Household heterogeneity

ID LIFE-STYLE; ELECTRICITY CONSUMPTION; SOCIO-DEMOGRAPHICS; BUILDING FACTORS; EMISSIONS; MODEL; ALLOCATION; INTENSITY; BEHAVIORS; ATTITUDES

AB Household lifestyles, and activity patterns in particular, greatly influence household energy use. In this paper we analyse the disparities in current activity patterns and related energy consumptions and expenditures of households, for a comprehensive set of everyday activities covering 24 h. Thanks to detailed data on energy consumption by end use, we are able to allocate the total of household energy consumptions to the appropriate activities. We comment on average energy and expenditure intensities of time uses of the total population as well as of income, household-composition and housing-type subgroups. Income, an obvious driver of energy and expenditure intensities, is revealed to influence time use as well. Household composition and housing type are also associated with substantial variations in activity patterns and in the energy and expenditure intensities of activities, even within a given income

group. Indeed, sometimes the variations associated with income are smaller than the variations associated with other variables. We therefore underline the importance of household disaggregation in household energy analyses, to properly account for such disparities.

- C1 [De Lauretis, Simona; Ghersi, Frederic] Univ Paris Saclay, CIRED, AgroParisTech, CIRAD,CNRS,EHESS,Ecole Ponts Paris Tech, 45 Bis Ave Belle Gabrielle, F-94130 Nogent Sur Marne, France.  
[De Lauretis, Simona; Cayla, Jean-Michel] Elect France EDF R&D, Ave Renardigres, F-77818 Moret Sur Loing, France.
- RP De Lauretis, S (reprint author), Univ Paris Saclay, CIRED, AgroParisTech, CIRAD,CNRS,EHESS,Ecole Ponts Paris Tech, 45 Bis Ave Belle Gabrielle, F-94130 Nogent Sur Marne, France.  
EM delauretis@centre-cired.fr; ghersi@centre-cired.fr;  
jean-michel.cayla@edf.fr
- CR Baiocchi G, 2010, J IND ECOL, V14, P50, DOI 10.1111/j.1530-9290.2009.00216.x  
BECKER GS, 1965, ECON J, V75, P493, DOI 10.2307/2228949  
Biesiot W, 1999, ECOL ECON, V28, P367, DOI 10.1016/S0921-8009(98)00113-X  
Bin S, 2005, ENER POLICY, V33, P197, DOI 10.1016/S0301-4215(03)00210-6  
Brencic V, 2009, ECOL ECON, V68, P2859, DOI 10.1016/j.ecolecon.2009.06.005  
Cayla JM, 2015, APPL ENER, V139, P56, DOI 10.1016/j.apenergy.2014.11.015  
Druckman A, 2012, ECOL ECON, V84, P153, DOI 10.1016/j.ecolecon.2012.09.008  
Duarte R, 2016, APPL ENER, V184, P1207, DOI 10.1016/j.apenergy.2015.09.101  
Duarte R, 2013, ECOL ECON, V96, P1, DOI 10.1016/j.ecolecon.2013.09.007  
Ellegard K, 2011, APPL ENER, V88, P1920, DOI 10.1016/j.apenergy.2010.11.019  
Gardes F., 2014, FULL PRICE ELASTICIT  
Girod B, 2010, J IND ECOL, V14, P31, DOI 10.1111/j.1530-9290.2009.00202.x  
Gronau R, 2006, REV INCOME WEALTH, P1  
Hamermesh DS, 2007, AM J AGR ECON, V89, P852, DOI 10.1111/j.1467-8276.2007.01012.x  
Huebner G, 2016, APPL ENER, V177, P692, DOI 10.1016/j.apenergy.2016.04.075  
Huebner GM, 2015, APPL ENER, V159, P589, DOI 10.1016/j.apenergy.2015.09.028  
INSEE, 2006, ENQ LOG 2006  
INSEE, 2010, EMPL TEMPS EDT 2009  
INSEE, 2011, BUDG FAM BDF 2011  
Jaccard M, 2006, ENVIRON MODEL ASSESS, V11, P91, DOI 10.1007/s10666-005-9036-0  
Jackson T, 2009, PROSPERITY GROWTH EC  
Jackson T., 2005, TECHNICAL REPORT  
Jalas M, 2005, J IND ECOL, V9, P129, DOI 10.1162/1088198054084644  
Jalas M, 2002, ECOL ECON, V41, P109, DOI 10.1016/S0921-8009(02)00018-6  
Jalas M, 2015, ECOL ECON, V113, P51, DOI 10.1016/j.ecolecon.2015.02.016  
Jenkins SP, 1996, REV INCOME WEALTH, V42  
LUTZENHISER L, 1993, ANNU REV ENER ENV, V18, P247, DOI 10.1146/annurev.energy.18.1.247  
MEEM, BAS DONN PEG PETR EL  
MEEM, 2008, ENQ NAT TRANSP DEPL  
MEEM, 2013, ENQ PERF HAB EQ BES  
Moriarty P, 2010, ENER POLICY, V38, P695, DOI 10.1016/j.enpol.2009.10.043  
Sanquist TF, 2012, ENER POLICY, V42, P354, DOI 10.1016/j.enpol.2011.11.092  
SCHIPPER L, 1989, ANNU REV ENERGY, V14, P273, DOI 10.1146/annurev.eg.14.110189.001421  
SOeS, 2011, TECHNICAL REPORT, V1  
Stankovic L, 2016, APPL ENER, V183, P1565, DOI 10.1016/j.apenergy.2016.09.087  
Wei YM, 2007, ENER POLICY, V35, P247, DOI 10.1016/j.enpol.2005.11.020  
Yun GY, 2011, APPL ENER, V88, P2191, DOI 10.1016/j.apenergy.2011.01.010
- NR 37  
TC 2  
Z9 2  
U1 2  
U2 2  
PU ELSEVIER SCI LTD  
PI OXFORD  
PA THE BOULEVARD, LANGFORD LANE, KIDLINGTON, OXFORD OX5 1GB, OXON, ENGLAND  
SN 0306-2619

EI 1872-9118  
J9 APPL ENERG  
JI Appl. Energy  
PD NOV 15  
PY 2017  
VL 206  
BP 634  
EP 648  
DI 10.1016/j.apenergy.2017.08.180  
PG 15  
WC Energy & Fuels; Engineering, Chemical  
SC Energy & Fuels; Engineering  
GA FN1RH  
UT WOS:000415768400055  
DA 2018-05-03  
ER

PT J  
AU Magalhaes, SMC  
    Leal, VMS  
    Horta, IM  
AF Magalhaes, Sara M. C.  
    Leal, Vitor M. S.  
    Horta, Isabel M.

TI Modelling the relationship between heating energy use and indoor temperatures in residential buildings through Artificial Neural Networks considering occupant behavior

SO ENERGY AND BUILDINGS

LA English

DT Article

DE Heating energy use; Indoor temperatures; Residential buildings; Artificial neural networks; Modeling

ID REGRESSION-MODELS; STATISTICAL-MODEL; OFFICE BUILDINGS; UNITED-STATES; CONSUMPTION; PERFORMANCE; DEMAND; SPACE; VALIDATION; DESIGN

AB The heating energy demand stated in energy performance certificates (EPC) and in other instruments used in the of evaluation of building's energy performance is usually determined assuming very specific (reference) indoor behavioral/heating patterns. Particularly, they tend to assume that households heat (nearly) the entire house to a "comfort" temperature during (nearly) all the heating season. However, several field studies have shown that there are major niches of the housing stock which do not follow this pattern (even the majority, in some geographical areas). Considering this matter, it would be interesting to build models able to estimate heating energy use values resultant from occupation and heating patterns different from those considered as "reference".

This work aimed at producing tools to assess the relationship between heating energy use and indoor temperatures at different levels of occupant behavior (in terms of where, when and at what temperature households heat their dwellings). This relationship was expressed through models while still takes advantage of the information from the certificates.

The work developed artificial neural networks (ANN) that characterize the relationship between heating energy use, indoor temperatures and the heating energy demand under reference conditions (typically available from energy rating/certificates) in the residential buildings, for different occupant behaviors heating patterns. Theoretically, these models can be applicable to any national geographical context.

The data for building the ANNs was obtained from dynamic thermal building simulations using ESP-r, considering a large number of housing types and hypothetical occupation and heating patterns (i.e., which parts of the house are heated, when and at what temperature). From the analysis performed, it was possible to conclude that the developed ANN models proved to perform well ( $R^2 > 0.93$ ) in estimating either heating energy use or indoor temperature, both at an individual and at the building stock level.

This work may have important contributions in the energy planning practices regarding the residential building stock. (C) 2017 Elsevier B.V. All rights reserved.

- C1 [Magalhaes, Sara M. C.] Univ Porto, Fac Engr, Inst Sci & Innovat Mech & Ind Engr, Rua Dr Roberto Farias, P-4200465 Oporto, Portugal.  
 [Leal, Vitor M. S.] Univ Porto, Fac Engr, Dept Mech Engr, Rua Dr Roberto Farias, P-4200465 Oporto, Portugal.  
 [Horta, Isabel M.] Univ Porto, Fac Engr, Dept Ind Management & Engr, Rua Dr Roberto Frias, P-4200465 Oporto, Portugal.
- RP Magalhaes, SMC (reprint author), Univ Porto, Fac Engr, Inst Sci & Innovat Mech & Ind Engr, Rua Dr Roberto Farias, P-4200465 Oporto, Portugal.  
 EM sara.magalhaes@fe.up.pt; vleal@fe.up.pt; imhorta@fe.up.pt  
 OI Leal, Vitor/0000-0001-8396-2907; Horta, Isabel/0000-0001-9436-6107  
 FU North Regional Coordination and Development Committee; Portuguese Foundation for Science and Technology [SFRH/BD/51591/2011]
- FX This work has been done under the "Energy Efficiency in the Built Environment" project and funded by the North Regional Coordination and Development Committee. The authors acknowledge the financial support from the Portuguese Foundation for Science and Technology through the doctoral grant (SFRH/BD/51591/2011) under the MIT Portugal program. The authors would also like to express their gratitude to colleagues Ana Ferreira by her support crucial to the design of the building models used in thermal simulations.
- CR Agatonovic-Kustrin S, 2000, J PHARMACEUT BIOMED, V22, P717, DOI 10.1016/S0731-7085(99)00272-1  
 Ahmad AS, 2014, RENEW SUST ENERG REV, V33, P102, DOI 10.1016/j.rser.2014.01.069  
 Asadi E, 2014, ENERG BUILDINGS, V81, P444, DOI 10.1016/j.enbuild.2014.06.009  
 Ascione F, 2013, CITIES, V35, P270, DOI 10.1016/j.cities.2013.04.012  
 Audenaert A, 2011, ENERG POLICY, V39, P5219, DOI 10.1016/j.enpol.2011.05.042  
 Aydinalp M, 2004, APPL ENERG, V79, P159, DOI 10.1016/j.apenergy.2003.12.006  
 Beale H.D.Mark, 1992, NEURAL NETWORK TOOLB  
 Bell M, 2000, ENERG BUILDINGS, V32, P267, DOI 10.1016/S0378-7788(00)00053-0  
 Buratti C, 2014, APPL ENERG, V120, P125, DOI 10.1016/j.apenergy.2014.01.053  
 Capozzoli A, 2015, ENERG BUILDINGS, V105, P302, DOI 10.1016/j.enbuild.2015.07.024  
 Catalina T, 2008, ENERG BUILDINGS, V40, P1825, DOI 10.1016/j.enbuild.2008.04.001  
 Cheng MY, 2014, APPL SOFT COMPUT, V22, P178, DOI 10.1016/j.asoc.2014.05.015  
 Chou JS, 2014, ENERG BUILDINGS, V82, P437, DOI 10.1016/j.enbuild.2014.07.036  
 Depecker P, 2001, BUILD ENVIRON, V36, P627, DOI 10.1016/S0360-1323(00)00044-5  
 Eftekhari Behzad, 2005, BMC Med Inform Decis Mak, V5, P3  
 Fouquier A, 2013, RENEW SUST ENERG REV, V23, P272, DOI 10.1016/j.rser.2013.03.004  
 Geddes CC, 1998, NEPHROL DIAL TRANSPL, V13, P67, DOI 10.1093/ndt/13.1.67  
 Geem ZW, 2009, ENERG POLICY, V37, P4049, DOI 10.1016/j.enpol.2009.04.049  
 Haas R, 1998, ENERG BUILDINGS, V27, P195, DOI 10.1016/S0378-7788(97)00034-0  
 Hagan M. T., 1996, NEURAL NETWORK DESIG  
 Han J., 2006, DATA MINING CONCEPTS  
 Hong T, 2015, APPL ENERG, V155, P671, DOI 10.1016/j.apenergy.2015.06.043  
 Howard B, 2012, ENERG BUILDINGS, V45, P141, DOI 10.1016/j.enbuild.2011.10.061  
 Hyndman RJ, 2006, INT J FORECASTING, V22, P679, DOI 10.1016/j.ijforecast.2006.03.001  
 Jaffal I, 2009, ENERG BUILDINGS, V41, P669, DOI 10.1016/j.enbuild.2009.01.006  
 Kabak M, 2014, ENERG BUILDINGS, V72, P382, DOI 10.1016/j.enbuild.2013.12.059  
 Kane T, 2015, ENERG BUILDINGS, V86, P817, DOI 10.1016/j.enbuild.2014.10.011  
 Katunsky D, 2013, BUILD ENVIRON, V67, P138, DOI 10.1016/j.buildenv.2013.05.014  
 Kialashaki A, 2014, ENERGY, V76, P749, DOI 10.1016/j.energy.2014.08.072  
 Kialashaki A, 2013, APPL ENERG, V108, P271, DOI 10.1016/j.apenergy.2013.03.034  
 Lam JC, 1997, ENERG BUILDINGS, V26, P189, DOI 10.1016/S0378-7788(96)01034-1  
 Lam JC, 1996, BUILD ENVIRON, V31, P27, DOI 10.1016/0360-1323(95)00031-3  
 Lee JW, 2013, RENEW ENERG, V50, P522, DOI 10.1016/j.renene.2012.07.029  
 Magalhaes SMC, 2016, ENERG BUILDINGS, V119, P293, DOI 10.1016/j.enbuild.2016.03.064  
 Magnier L, 2010, BUILD ENVIRON, V45, P739, DOI 10.1016/j.buildenv.2009.08.016  
 Majcen DA, 2015, ENERG BUILDINGS, V105, P43, DOI 10.1016/j.enbuild.2015.07.009  
 Mateo F, 2013, EXPERT SYST APPL, V40, P1061, DOI 10.1016/j.eswa.2012.08.030  
 MATLAB MATLAB Tutorial, TRAIN APPL MULT NEUR

Melo AP, 2014, ENER POLICY, V69, P457, DOI 10.1016/j.enpol.2014.02.001  
 Milne G, 2000, ENER POLICY, V28, P411, DOI 10.1016/S0301-4215(00)00019-7  
 Murphy L, 2014, ENER POLICY, V67, P664, DOI 10.1016/j.enpol.2013.11.054  
 Oreszczyn T, 2006, ENER BUILDINGS, V38, P245, DOI 10.1016/j.enbuild.2005.06.006  
 Paudel S, 2014, ENER BUILDINGS, V70, P81, DOI 10.1016/j.enbuild.2013.11.051  
 Piltan M, 2012, ENER CONVERS MANAGE, V58, P1, DOI 10.1016/j.enconman.2011.12.022  
 Rodger JA, 2014, EXPERT SYST APPL, V41, P1813, DOI 10.1016/j.eswa.2013.08.080  
 Santin OG, 2011, ENER BUILDINGS, V43, P2662, DOI 10.1016/j.enbuild.2011.06.024  
 Santin OG, 2009, ENER BUILDINGS, V41, P1223, DOI 10.1016/j.enbuild.2009.07.002  
 Schuler A, 2000, ENER POLICY, V28, P877, DOI 10.1016/S0301-4215(00)00074-4  
 Seo DY, 2015, APPL ENER, V142, P66, DOI 10.1016/j.apenergy.2014.12.051  
 Tian W, 2012, ENER BUILDINGS, V54, P1, DOI 10.1016/j.enbuild.2012.06.031  
 Tsanas A, 2012, ENER BUILDINGS, V49, P560, DOI 10.1016/j.enbuild.2012.03.003  
 Van Hoof J, 2007, BUILD ENVIRON, V42, P156, DOI 10.1016/j.buildenv.2005.08.023  
 VANRAAIJ WF, 1983, J ECON PSYCHOL, V3, P39, DOI 10.1016/0167-4870(83)90057-0  
 Xu XQ, 2012, ENER BUILDINGS, V55, P637, DOI 10.1016/j.enbuild.2012.09.013  
 Yeo IA, 2014, APPL ENER, V119, P99, DOI 10.1016/j.apenergy.2013.12.060  
 Yun GY, 2009, ENER BUILDINGS, V41, P489, DOI 10.1016/j.enbuild.2008.11.013

NR 56

TC 2

Z9 2

U1 11

U2 12

PU ELSEVIER SCIENCE SA

PI LAUSANNE

PA PO BOX 564, 1001 LAUSANNE, SWITZERLAND

SN 0378-7788

EI 1872-6178

J9 ENER BUILDINGS

J1 Energy Build.

PD SEP 15

PY 2017

VL 151

BP 332

EP 343

DI 10.1016/j.enbuild.2017.06.076

PG 12

WC Construction & Building Technology; Energy & Fuels; Engineering, Civil

SC Construction & Building Technology; Energy & Fuels; Engineering

GA FG3AY

UT WOS:000410010400029

DA 2018-05-03

ER

PT J

AU Clancy, JM

Curtis, T

O'Gallachoir, BP

AF Clancy, J. M.

Curtis, T.

O'Gallachoir, B. P.

TI What are the factors that discourage companies in the Irish commercial sector from investigating energy saving options?

SO ENERGY AND BUILDINGS

LA English

DT Article

DE Energy efficiency; Commercial sector; Barriers; Logit model

ID MEDIUM-SIZED ENTERPRISES; EFFICIENCY GAP; DRIVING FORCES; MISSING DATA;



## BARRIERS; INVESTMENTS; MARKET; INDUSTRY; FIRMS; CONSERVATION

AB To implement an energy saving measure, companies must first decide to investigate the options available. Representative survey data shows that almost half of companies in the Irish commercial sector do not take this step. This paper explores the barriers and drivers of this. Two logit models are fit to data to estimate the influence of variables, representing company and building characteristics, on the likelihoods of a company investigating either a fabric upgrade or a behaviour change measure.

Companies are more likely to investigate a fabric upgrade that: own the building they operate from, make energy related decisions locally, have more than 10 employees, have had a recent renovation, accept longer paybacks, and apply a case by case approach to budget decisions. Hotels and offices were found to have a higher likelihood of investigating fabric options. Lack of knowledge of building floor area reduced the likelihood of investigation of both fabric upgrade and behavioural options. Much of the previous research is concerned with the final adoption of measures; this analysis adds additional insights by identifying the factors that determine if a company is likely to investigate the options available. (C) 2017 Elsevier B.V. All rights reserved.

C1 [Clancy, J. M.] Sustainable Energy Author Ireland, Wilton Pk House, Wilton Pl, Dublin 2, Ireland.

[Clancy, J. M.; O'Gallachoir, B. P.] Univ Coll Cork, Environm Res Inst, MaREI Ctr Marine & Renewable Energy, Cork, Ireland.

[Clancy, J. M.; O'Gallachoir, B. P.] Univ Coll Cork, Sch Engn, Cork, Ireland.

[Curtis, T.] Trinity Coll Dublin, Dublin 2, Ireland.

[Curtis, T.] Econ & Social Res Inst, Sir John Rogersons Quay, Dublin 2, Ireland.

RP Clancy, JM (reprint author), Sustainable Energy Author Ireland, Wilton Pk House, Wilton Pl, Dublin 2, Ireland.

EM jmatthew.clancy@gmail.com

OI Curtis, John/0000-0002-6957-5684

FU Sustainable Energy Authority of Ireland (SEAI); ESRI's Energy Policy Research Centre; Science Foundation Ireland [12/RC/2302]

FX Matthew Clancy's research at UCC is funded by the Sustainable Energy Authority of Ireland (SEAI). John Curtis acknowledges funding from ESRI's Energy Policy Research Centre. This research is also supported by the Science Foundation Ireland under Grant No. 12/RC/2302.

CR Anderson ST, 2004, RESOUR ENERGY ECON, V26, P27, DOI 10.1016/j.reseneeco.2003.07.001

Aramyan LH, 2007, AGR SYST, V94, P520, DOI 10.1016/j.agsy.2007.01.005

Backlund S, 2012, ENER POLICY, V51, P392, DOI 10.1016/j.enpol.2012.08.042

BLUMSTEIN C, 1980, ENERGY, V5, P355, DOI 10.1016/0360-5442(80)90036-5

Bossmann T., 2012, CONCRETE PATHS EUROP, V2050

Brown MA, 2001, ENER POLICY, V29, P1197, DOI 10.1016/S0301-4215(01)00067-2

Cagno E, 2013, RENEW SUST ENER REV, V19, P290, DOI 10.1016/j.rser.2012.11.007

Cagno E, 2013, APPL ENER, V104, P276, DOI 10.1016/j.apenergy.2012.10.053

Capros P, 2016, EU REFERENCE SCENARI

Central Statistics Office, 2014, BUS DEM 2014

Chiodi A, 2013, ENER POLICY, V53, P169, DOI 10.1016/j.enpol.2012.10.045

Cooremans C, 2012, ENER EFFIC, V5, P497, DOI 10.1007/s12053-012-9154-x

de Almeida ELF, 1998, ENER POLICY, V26, P643, DOI 10.1016/S0301-4215(98)00023-8

de Groot HLF, 2001, ENER ECON, V23, P717, DOI 10.1016/S0140-9883(01)00083-4

DeCanio SJ, 1998, REV ECON STAT, V80, P95, DOI 10.1162/003465398557366

DeCanio SJ, 1998, ENER POLICY, V26, P441, DOI 10.1016/S0301-4215(97)00152-3

DECANIO SJ, 1993, ENER POLICY, V21, P906, DOI 10.1016/0301-4215(93)90178-I

DECANIO SJ, 1994, J ECON BUS, V1, P105

Diederer P, 2003, ENVIRON RESOUR ECON, V24, P379, DOI 10.1023/A:1023617318184

Eichhammer W., 2009, STUDY ENERGY SAVINGS

Element Energy and The Research Perspective for SEAL, 2015, EXT SURV COMM BUILD

Element Energy and The Research Perspective for SERI, 2015, SURV CONS BEH COMM S

European Commission, 2016, EU EN FIG

Eyre N., 1997, ENERGY ENV, V8, P25

FISHER AC, 1989, ENER POLICY, V17, P397, DOI 10.1016/0301-4215(89)90010-4

Fleiter T, 2012, ENER POLICY, V51, P863, DOI 10.1016/j.enpol.2012.09.041

Golove W.H., 1996, LBL38059 LAWR BERK N

Graham JW, 2007, PREV SCI, V8, P206, DOI 10.1007/s11121-007-0070-9

- Graham JW, 2009, ANNU REV PSYCHOL, V60, P549, DOI 10.1146/annurev.psych.58.110405.085530
- GRUBER E, 1991, ENERG POLICY, V19, P279, DOI 10.1016/0301-4215(91)90152-E
- Harris J, 2000, ENERG POLICY, V28, P867, DOI 10.1016/S0301-4215(00)00075-6
- HIRST E, 1990, RESOUR CONSERV RECY, V3, P267, DOI 10.1016/0921-3449(90)90023-W
- Horton N.J., 2007, MUCH ADO NOTHING, V61
- HOWARTH RB, 1993, ENERG ECON, V15, P262, DOI 10.1016/0140-9883(93)90016-K
- Howley M., 2015, ENERGY IRELAND 1990
- IEA, 2014, CAPT MULT BEN EN EFF
- IEA, 2012, WORLD EN OUTL 2012, P267
- IEA, 2007, MIND GAP QUANT PRINC
- Intergovernmental Panel Climate Change Working Grp III, 2014, CLIMATE CHANGE 2014: MITIGATION OF CLIMATE CHANGE, P1
- JAFFE AB, 1994, ENERG POLICY, V22, P804, DOI 10.1016/0301-4215(94)90138-4
- Kostka G, 2013, J CLEAN PROD, V57, P59, DOI 10.1016/j.jclepro.2013.06.025
- Muthulingam S., 2011, DECIS OPERAT TECHNOL
- Nagesha N, 2006, ENERGY, V31, P1969, DOI 10.1016/j.energy.2005.07.002
- National Competitiveness Council, 2016, ENT INN
- Oettinger G., 2013, J INT ENERGY AGENCY, P1
- O'Malley E., 2004, EC ENERGY EFFICIENCY
- Ostertag K., 2002, NO REGRET POTENTIALS
- Reddy B.S., 2007, WP 2007 003 IGDR WO
- Revell A, 2010, BUS STRATEG ENVIRON, V19, P273, DOI 10.1002/bse.628
- Rohdin P, 2006, ENERGY, V31, P1836, DOI 10.1016/j.energy.2005.10.010
- Rohdin P, 2007, ENERG POLICY, V35, P672, DOI 10.1016/j.enpol.2006.01.010
- SANSTAD AH, 1994, ENERG POLICY, V22, P811, DOI 10.1016/0301-4215(94)90139-2
- Sathaye J., 2001, CLIMATE CHANGE 2001, P345
- Schafer JL, 2002, PSYCHOL METHODS, V7, P147, DOI 10.1037//1082-989X.7.2.147
- Scheer J, 2015, UNLOCKING ENERGY EFF
- Schleich J, 2008, ENERG ECON, V30, P449, DOI 10.1016/j.eneco.2006.08.004
- Schleich J, 2009, ECOL ECON, V68, P2150, DOI 10.1016/j.ecolecon.2009.02.008
- Seligman C., 1981, ADV ENVIRON PSYCHOL, V3, P93
- Simpson M., 2004, BUSINESS STRATEGY EN, V13, P156, DOI DOI 10.1002/BSE.398
- Sorrell Steve, 2004, EC ENERGY EFFICIENCY
- Sorrell S., 2000, REDUCING BARRIERS EN
- Sorrell S, 2011, BARRIERS IND ENERGY
- Stern P. C., 1984, ENERGY USE HUMAN DIM
- Studer S., 2006, BUSINESS STRATEGY EN, V15, P416, DOI DOI 10.1002/(ISSN)1099-0836
- Sustainable Energy Authority of Ireland, 2017, EN PORT EN DAT PORT
- Thollander P, 2007, ENERG POLICY, V35, P5774, DOI 10.1016/j.enpol.2007.06.013
- Thollander P, 2008, ENERG EFFIC, V1, P21, DOI 10.1007/s12053-007-9001-7
- Trianni A, 2012, ENERGY, V37, P494, DOI 10.1016/j.energy.2011.11.005
- Velthuijsen J., 1993, ENVIRON RESOUR ECON, V3, P153
- Velthuijsen J.W., 1995, DETERMINANTS INVESTM
- Weber L, 1997, ENERG POLICY, V25, P833, DOI 10.1016/S0301-4215(97)00084-0
- Wesselink B., 2010, CONTRIBUTING STUDIES, V2050, P2
- Worrell E, 2003, ENERGY, V28, P1081, DOI 10.1016/S0360-5442(03)00091-4

NR 73

TC 2

Z9 2

U1 0

U2 1

PU ELSEVIER SCIENCE SA

PI LAUSANNE

PA PO BOX 564, 1001 LAUSANNE, SWITZERLAND

SN 0378-7788

EI 1872-6178

J9 ENERG BUILDINGS

JI Energy Build.

PD JUL 1  
 PY 2017  
 VL 146  
 BP 243  
 EP 256  
 DI 10.1016/j.enbuild.2017.04.077  
 PG 14  
 WC Construction & Building Technology; Energy & Fuels; Engineering, Civil  
 SC Construction & Building Technology; Energy & Fuels; Engineering  
 GA EX3HC  
 UT WOS:000403122200021  
 DA 2018-05-03  
 ER

PT J  
 AU Atam, E  
 AF Atam, Ercan  
 TI Current software barriers to advanced model-based control design for energy-efficient buildings  
 SO RENEWABLE & SUSTAINABLE ENERGY REVIEWS  
 LA English  
 DT Review  
 DE Energy-efficient buildings; Advanced model-based control design; Software; Tools; FMI  
 ID MULTIZONE BUILDINGS; RESEARCH CHALLENGES; PREDICTIVE CONTROL; SIMULATION; SYSTEMS

AB Fast and easy advanced model-based control design for energy-efficient multi-zone buildings is crucial for optimal energy savings, and this strongly depends on the availability and capability of advanced simulation and control design software and tools. In this paper, first a state-of-the-art review of the commonly used major software and tools by the community is done with respect to the barriers they present to advanced model-based control design for energy-efficient buildings. Next, the relevant novel concept of Functional Moke-up Interface is reviewed and the associated advances up to date are summarized. Finally, a set desired control-oriented features for new generation tools are given towards better solutions for energy-efficient building control designs.

C1 [Atam, Ercan] Bogazici Univ, Dept Ind Engr, TR-34342 Istanbul, Turkey.

RP Atam, E (reprint author), Bogazici Univ, Dept Ind Engr, TR-34342 Istanbul, Turkey.

EM ercan.atam@boun.edu.tr

FU scientific and technological research council of Turkey (TUBITAK)  
 [116C002]

FX Ercan Atam acknowledges the scientific and technological research council of Turkey (TUBITAK) for supporting his research work within "Decentralized Modeling and Distributed Adaptive Model Predictive Control of Multi-Thermal Zone Buildings for Energy Efficiency" project (No: 116C002).

CR Aelenei L, 2014, ENERGY PROCEDIA, V48, P1236

Atam E, 2014, SSB2014 SYSTEM SIMUL

Atam E, 2013, P EUR GEOTH C 2013 E

Atam E, 2016, IEEE IND ELECTRON M, V10, P50, DOI 10.1109/MIE.2016.2615127

Atam E, 2016, ENER BUILDINGS, V126, P384, DOI 10.1016/j.enbuild.2016.05.029

Atam E, 2016, IEEE CONTR SYST MAG, V36, P86, DOI 10.1109/MCS.2016.2535913

Atam E, 2013, BUILDING SIMULATION 2013: 13TH INTERNATIONAL CONFERENCE OF THE INTERNATIONAL BUILDING PERFORMANCE SIMULATION ASSOCIATION, P2052

Atam E, 2016, IEEE T CONTR SYST T, V24, P525, DOI 10.1109/TCST.2015.2445851

Atam E, 2016, RENEW SUST ENER REV, V54, P1668, DOI 10.1016/j.rser.2015.07.009

Atam E, 2016, RENEW SUST ENER REV, V54, P1653, DOI 10.1016/j.rser.2015.10.007

Atam E, 2015, ENER BUILDINGS, V93, P269, DOI 10.1016/j.enbuild.2015.02.026

ATTIA S., 2009, INT IBPSA C GLASG SC, P204

Attia S, 2012, J BUILD PERFORM SIMU, V5, P155, DOI 10.1080/19401493.2010.549573

Bahaj AS, 2007, ENER G BUILDINGS, V39, P154, DOI 10.1016/j.enbuild.2006.06.001  
Bengea SC, 2014, HVAC&R RES, V20, P121, DOI 10.1080/10789669.2013.834781  
Bernal W., 2012, P 4 ACM WORKSH EMB S, P123  
Building Physics research group Chalmers University of Technology, 2012, IBPT INT BUILD PHYS  
Chemisana D, 2011, RENEW SUST ENER G REV, V15, P603, DOI 10.1016/j.rser.2010.07.017  
Chen Z, 2012, IEEE T SMART GRID, V3, P1822, DOI 10.1109/TSG.2012.2212729  
Chiang M. L., 2006, P AM CONTR C MINN, P5324  
Connolly D, 2010, APPL ENER G, V87, P1059, DOI 10.1016/j.apenergy.2009.09.026  
Crawley DB, 2008, BUILD ENVIRON, V43, P661, DOI 10.1016/j.buildenv.2006.10.027  
Centre Scientifique et Technique du Batiment, 2010, SIMBAD BUILD HVAC MO  
Dayan E, 2006, REFOCUS, V7, P33, DOI DOI 10.1016/S1471-0846(06)70545-5  
Dixit MK, 2010, ENER G BUILDINGS, V42, P1238, DOI 10.1016/j.enbuild.2010.02.016  
Dong B, 2014, BUILD SIMUL-CHINA, V7, P89, DOI 10.1007/s12273-013-0142-7  
Favre B, 2014, ENER G BUILDINGS, V82, P57, DOI 10.1016/j.enbuild.2014.07.018  
Garg V, 2010, ASME 2010 P 4 INT C  
Goyal S, 2015, APPL ENER G, V140, P75, DOI 10.1016/j.apenergy.2014.11.064  
Harish VSKV, 2016, RENEW SUST ENER G REV, V56, P1272, DOI 10.1016/j.rser.2015.12.040  
Lauro F, 2014, 2014 IEEE INTERNATIONAL WORKSHOP ON INTELLIGENT ENERGY SYSTEMS (IWIES), P32, DOI 10.1109/IWIES.2014.6957043  
Mady A. E. D., 2011, P 25 AAAI C ART INT, P1371  
Maile T, 2007, 107 CIFE WP  
Nouidui TS, 2014, J BUILD PERFORM SIMU, V7, P192, DOI 10.1080/19401493.2013.808265  
Perez-Lombard L, 2008, ENER G BUILDINGS, V40, P394, DOI 10.1016/j.enbuild.2007.03.007  
Putta VK, 2014, P 3 INT HIGH PERF BU, P1  
Rallapalli H. S., 2010, THESIS  
Rasmussen BP, 2010, IEEE T CONTR SYST T, V18, P1216, DOI 10.1109/TCST.2009.2035104  
Rijksen DO, 2010, ENER G BUILDINGS, V42, P298, DOI 10.1016/j.enbuild.2009.09.007  
Sanner B., 2016, P EUR GEOTH C SEPT 1  
Schulte DO, 2017, ENERGY PROC IN PRESS  
SEL, 1998, TRNSYS TRANS SIM PRO  
Solar Institut Juelich and Scientific Computers, 2013, CARNOT BLOCKS CONV R  
Sousa J., 2012, P INT WORKSH INF TEC  
Strand RK, 2001, P BUILD SIM, P43  
Sturzenegger D, 2014, P AMER CONTR CONF, P1063, DOI 10.1109/ACC.2014.6858967  
University of California Berkeley, 2016, MPC TOOL ENERGYPLUS  
Wetter M, 2009, J BUILD PERFORM SIMU, V2, P143, DOI 10.1080/19401490902818259  
Yoon JH, 2014, IEEE T SMART GRID, V5, P121, DOI 10.1109/TSG.2013.2264970  
Zhao J, 2013, P 13 INT BUILD SIM C  
Zhu DD, 2013, BUILD SIMUL-CHINA, V6, P323, DOI 10.1007/s12273-013-0126-7

NR 51

TC 2

Z9 2

U1 3

U2 3

PU PERGAMON-ELSEVIER SCIENCE LTD

PI OXFORD

PA THE BOULEVARD, LANGFORD LANE, KIDLINGTON, OXFORD OX5 1GB, ENGLAND

SN 1364-0321

J9 RENEW SUST ENER G REV

JI Renew. Sust. Energ. Rev.

PD JUN

PY 2017

VL 73

BP 1031

EP 1040

DI 10.1016/j.rser.2017.02.015

PG 10

WC GREEN & SUSTAINABLE SCIENCE & TECHNOLOGY; Energy & Fuels

SC Science & Technology - Other Topics; Energy & Fuels  
GA EU7HA  
UT WOS:000401204700077  
DA 2018-05-03  
ER

PT J

AU Hussain, A

Bui, VH

Kim, HM

Im, YH

Lee, JY

AF Hussain, Akhtar

Bui, Van-Hai

Kim, Hak-Man

Im, Yong-Hoon

Lee, Jae-Yong

TI Optimal Energy Management of Combined Cooling, Heat and Power in  
Different Demand Type Buildings Considering Seasonal Demand Variations

SO ENERGIES

LA English

DT Article

DE building microgrids (BMGs); energy management; energy prosumer;  
microgrid operation; combined cooling; heat and power; thermal energy  
storage

ID TRI-GENERATION; SYSTEM; OPTIMIZATION; TECHNOLOGIES; MICROGRIDS; COST

AB In this paper, an optimal energy management strategy for a cooperative multi-microgrid system with combined cooling, heat and power (CCHP) is proposed and has been verified for a test case of building microgrids (BMGs). Three different demand types of buildings are considered and the BMGs are assumed to be equipped with their own combined heat and power (CHP) generators. In addition, the BMGs are also connected to an external energy network (EEN), which contains a large CHP, an adsorption chiller (ADC), a thermal storage tank, and an electric heat pump (EHP). By trading the excess electricity and heat energy with the utility grid and EEN, each BMG can fulfill its energy demands. Seasonal energy demand variations have been evaluated by selecting a representative day for the two extreme seasons (summer and winter) of the year, among the real profiles of year-round data on electricity, heating, and cooling usage of all the three selected buildings. Especially, the thermal energy management aspect is emphasized where, bi-lateral heat trading between the energy supplier and the consumers, so-called energy prosumer concept, has been realized. An optimization model based on mixed integer linear programming has been developed for minimizing the daily operation cost of the EEN while fulfilling the energy demands of the BMGs. Simulation results have demonstrated the effectiveness of the proposed strategy.

C1 [Hussain, Akhtar; Bui, Van-Hai; Kim, Hak-Man] Incheon Natl Univ, Dept Elect Engn, 12-1 Songdo Dong, Incheon 406840, South Korea.

[Im, Yong-Hoon; Lee, Jae-Yong] Korea Inst Energy Res, 152 Gajeong Ro, Daejeon 34129, South Korea.

RP Kim, HM (reprint author), Incheon Natl Univ, Dept Elect Engn, 12-1 Songdo Dong, Incheon 406840, South Korea.; Lee, JY (reprint author), Korea Inst Energy Res, 152 Gajeong Ro, Daejeon 34129, South Korea.

EM hussainakhtar@inu.ac.kr; buivanhaibk@inu.ac.kr; hmkim@inu.ac.kr;  
iyh@kier.re.kr; jylee@kier.re.kr

FU In-house Research and Development Program of the Korea Institute of  
Energy Research (KIER) [B7-2413-03]

FX This work was supported by In-house Research and Development Program of  
the Korea Institute of Energy Research (KIER) (B7-2413-03).

CR Ascione F, 2014, APPL THERM ENG, V71, P705, DOI 10.1016/j.applthermaleng.2013.10.058

Bracco S, 2015, ENERG CONVERS MANAGE, V96, P511, DOI 10.1016/j.enconman.2015.03.013

Carpenter J, 2014, ENERG BUILDINGS, V75, P465, DOI 10.1016/j.enbuild.2014.02.044

Cho H, 2014, APPL ENERG, V136, P168, DOI 10.1016/j.apenergy.2014.08.107

Colmenar-Santos A, 2016, APPL ENERG, V162, P892, DOI 10.1016/j.apenergy.2015.10.161

CPLEX Division, 2009, US MAN CPLEX 2009 CP

Eames IW, 2016, ENERGIES, V9, DOI 10.3390/en9030130

Fioretto F., 2017, P AAAI C ART INT SAN  
Gao PH, 2015, ENERGY, V79, P522, DOI 10.1016/j.energy.2014.11.050  
Gilan S. S., 2015, P WORKSH 29 AAAI C A, P101  
Gu CH, 2015, ENERGIES, V8, P14330, DOI 10.3390/en81212427  
Gu W, 2014, INT J ELEC POWER, V54, P26, DOI 10.1016/j.ijepes.2013.06.028  
Guo L, 2013, ENERG CONVERS MANAGE, V74, P433, DOI 10.1016/j.enconman.2013.06.051  
Gupta S., 2013, P DISTR CONSTR REAS, P45  
Hakimi S. M., 2013, P IEEE IND EL SOC VI  
Hussain A, 2017, SUSTAIN CITIES SOC, V32, P318, DOI 10.1016/j.scs.2017.04.004  
Hussain A, 2017, RENEW SUST ENERG REV, V71, P12, DOI 10.1016/j.rser.2016.12.033  
Hussain A, 2016, ENERGIES, V9, DOI 10.3390/en9040278  
Kluegel W., 2017, ARXIV170206970  
Li ZG, 2016, IEEE T SUSTAIN ENERG, V7, P480, DOI 10.1109/TSTE.2015.2500571  
Li ZG, 2016, IEEE T SUSTAIN ENERG, V7, P12, DOI 10.1109/TSTE.2015.2467383  
Mamidi S. K., 2012, P 2012 AAAI SPRING S, P46  
Marnay C., 2015, P IEEE INT S SMART E  
Negendahl K, 2015, ENERG BUILDINGS, V105, P88, DOI 10.1016/j.enbuild.2015.06.087  
Nguyen D. T., 2013, P IEEE INT C SMART G  
Nikos H., 2007, IEEE POWER ENERGY M, p[5, 78]  
Oh SD, 2014, ENERG BUILDINGS, V74, P120, DOI 10.1016/j.enbuild.2014.01.028  
Perea E, 2016, ENERG BUILDINGS, V111, P507, DOI 10.1016/j.enbuild.2015.11.025  
Persson U., 2014, P 14 INT S DISTR HEA  
Song NO, 2016, ENERGIES, V9, DOI 10.3390/en9060473  
Song NO, 2015, ENERGIES, V8, P8371, DOI 10.3390/en8088371  
Tabakhi A. M., 2017, PRELIMINARY STUDY PR  
Thangavelu SR, 2015, ENERGIES, V8, P10082, DOI 10.3390/en80910082  
Underwood C, 2015, ENERGIES, V8, P11095, DOI 10.3390/en81011095  
Wang JL, 2014, ENERG BUILDINGS, V72, P353, DOI 10.1016/j.enbuild.2013.12.053  
Wouters C, 2015, ENERGY, V85, P30, DOI 10.1016/j.energy.2015.03.051  
Wu T., 2015, P IEEE POWERTECH EIN  
Zhang W, 2017, IEEE T IND ELECTRON, V64, P5084, DOI 10.1109/TIE.2016.2617821  
Zhang XJ, 2013, IEEE T SMART GRID, V4, P2131, DOI 10.1109/TSG.2013.2264832

NR 39

TC 2

Z9 2

U1 6

U2 11

PU MDPI AG

PI BASEL

PA ST ALBAN-ANLAGE 66, CH-4052 BASEL, SWITZERLAND

SN 1996-1073

J9 ENERGIES

JI Energies

PD JUN

PY 2017

VL 10

IS 6

AR 789

DI 10.3390/en10060789

PG 21

WC Energy & Fuels

SC Energy & Fuels

GA EZ0HT

UT WOS:000404384000055

OA gold

DA 2018-05-03

ER

PT J

AU Miller, R

Golab, L

Rosenberg, C

AF Miller, Reid

Golab, Lukasz

Rosenberg, Catherine

TI Modelling weather effects for impact analysis of residential time-of-use  
electricity pricing

SO ENERGY POLICY

LA English

DT Article

DE Time-of-use pricing; Effect of weather on residential electricity  
demand; Regression models

ID DISTRIBUTED LAG; NONLINEAR MODELS; LOAD; TEMPERATURE; CUSTOMERS; DEMAND

AB Analyzing the impact of pricing policies such as time-of-use (TOU) is challenging in the presence of confounding factors such as weather. Motivated by a lack of consensus and model selection details in prior work, we present a methodology for modelling the effect of weather on residential electricity demand. The best model is selected according to explanatory power, out-of-sample prediction accuracy, goodness of fit and interpretability. We then evaluate the effect of mandatory TOU pricing in a local distribution company in southwestern Ontario, Canada. We use a smart meter dataset of over 20,000 households which is particularly suited to our analysis: it contains data from the summer before and after the implementation of TOU pricing in November 2011, and all customers transitioned from tiered rates to TOU rates at the same time. We find that during the summer rate season, TOU pricing results in electricity conservation across all price periods. The average demand change during on-peak and mid-peak periods is 2.6% and 2.4% respectively. Changes during off-peak periods are not statistically significant. These TOU pricing effects are less pronounced compared to previous studies, underscoring the need for clear, reproducible impact analyses which include full details about the model selection process.

C1 [Miller, Reid; Golab, Lukasz; Rosenberg, Catherine] Univ Waterloo, 200 Univ Ave West, Waterloo, ON N2L 3G1, Canada.

RP Golab, L (reprint author), Univ Waterloo, 200 Univ Ave West, Waterloo, ON N2L 3G1, Canada.

EM lgolab@uwaterloo.ca

FU Natural Sciences and Engineering Research Council of Canada; Waterloo  
Institute for Sustainable Energy/Cisco Smart Grid Research Fund

FX This research was funded by the Natural Sciences and Engineering  
Research Council of Canada (Rosenberg) and the Waterloo Institute for  
Sustainable Energy/Cisco Smart Grid Research Fund (Golab).

CR Adepetu A, 2013, INT CONF SMART GRID, P223, DOI 10.1109/SmartGridComm.2013.6687961

ALMON S, 1965, ECONOMETRICA, V33, P178, DOI 10.2307/1911894

Andersen FM, 2013, ENER G CONVERS MANAGE, V68, P244, DOI 10.1016/j.enconman.2013.01.018

BHARGAVA A, 1982, REV ECON STUD, V49, P533, DOI 10.2307/2297285

Breheny P., 2015, VISREG VISUALIZATION

Bruhns A., 2005, POW SYST COMP C NO A, P1

Cancelo JR, 2008, INT J FORECASTING, V24, P588, DOI 10.1016/j.ijforecast.2008.07.005

ENGLE RF, 1986, J AM STAT ASSOC, V81, P310, DOI 10.2307/2289218

Environment Canada, 2015, ENV CAN CLIM HOURL D

Environment Canada, 2015, ENV CAN WIND CHILL C

Faraway JJ., 2002, PRACTICAL REGRESSION

Faruqui A., 2013, IMPACT EVALUATION ON

Faruqui A, 2013, ENER EFFIC, V6, P571, DOI 10.1007/s12053-013-9192-z

Faruqui A, 2010, J REGUL ECON, V38, P193, DOI 10.1007/s11149-010-9127-y

Fox John, 2011, R COMPANION APPL REG

Friedrich L, 2014, ENER BUILDINGS, V80, P72, DOI 10.1016/j.enbuild.2014.05.011

Gasparrini A, 2010, STAT MED, V29, P2224, DOI 10.1002/sim.3940

Gasparrini A, 2011, J STAT SOFTW, V43, P1

HARVEY A, 1993, J AM STAT ASSOC, V88, P1228, DOI 10.2307/2291261

Hastie T., 2005, ELEMENTS STAT LEARNI

[Hydro One Hydro One Networks Inc.], 2008, TECH REP

Hyndman RJ, 2010, IEEE T POWER SYST, V25, P1142, DOI 10.1109/TPWRS.2009.2036017  
 IEEE Standards Association, 2012, IEEE GUID LOAD MIN O  
 James Gareth, 2013, INTRO STAT LEARNING  
 Jessoe K., 2013, AM EC ASS ANN M AM E, P1  
 LIFSON DP, 1981, ENERGY, V6, P403, DOI 10.1016/0360-5442(81)90003-7  
 Maggiore S., 2013, P 22 INT C EXH EL DI, V5, P1  
 Mei L., 2011, 2011 INT C COMP DIST, P2221  
 Moral-Carcedo J, 2005, ENERG ECON, V27, P477, DOI 10.1016/j.eneco.2005.01.003  
 MOUNTAIN DC, 1992, INT ECON REV, V33, P181, DOI 10.2307/2526990  
 Muggeo VMR, 2003, STAT MED, V22, P3055, DOI 10.1002/sim.1545  
 Muggeo V.M.R., 2008, R NEWS, V8, P20, DOI DOI 10.1159/000323281  
 Navigant Researchcollaboration, 2013, TECH REP  
 Navigant Research Newmarket-Tay Power Distribution, 2010, TECH REP  
 Newsham GR, 2010, ENERG POLICY, V38, P3289, DOI 10.1016/j.enpol.2010.01.027  
 Ontario Energy Board, 2012, TOU PRIC  
 Ontario Energy Board, 2004, BOARD PROP REG PRIC  
 Ontario Energy Board IBM eMeter Strategic Consulting, 2007, ONT EN BOARD SMART P  
 Pardo A, 2002, ENERG ECON, V24, P55, DOI 10.1016/S0140-9883(01)00082-2  
 Ramsey F. L., 2012, STAT SLEUTH COURSE M  
 Rothfusz LP, 1990, HEAT INDEX EQUATION  
 TRAIN K, 1994, RAND J ECON, V25, P263, DOI 10.2307/2555830  
 Zeileis A, 2005, J STAT SOFTW, V14

NR 43

TC 2

Z9 2

U1 3

U2 4

PU ELSEVIER SCI LTD

PI OXFORD

PA THE BOULEVARD, LANGFORD LANE, KIDLINGTON, OXFORD OX5 1GB, OXON, ENGLAND

SN 0301-4215

EI 1873-6777

J9 ENERG POLICY

JI Energy Policy

PD JUN

PY 2017

VL 105

BP 534

EP 546

DI 10.1016/j.enpol.2017.03.015

PG 13

WC Economics; Energy & Fuels; Environmental Sciences; Environmental Studies

SC Business & Economics; Energy & Fuels; Environmental Sciences & Ecology

GA ET8EY

UT WOS:000400532900051

DA 2018-05-03

ER

PT J

AU Curtis, J

Walton, A

Dodd, M

AF Curtis, Jim

Walton, Andrea

Dodd, Michael

TI Understanding the potential of facilities managers to be advocates for  
 energy efficiency retrofits in mid-tier commercial office buildings

SO ENERGY POLICY



LA English

DT Article

DE Facilities management; Buildings; Decision-making; Government programs

ID BEHAVIOR; BARRIERS; INDUSTRY; POLICIES; SECTOR

AB Realising energy efficiency opportunities in new commercial office buildings is an easier task than retrofitting older, mid-tier building stock. As a result, a number of government programs aim to support retrofits by offering grants, upgrades, and energy audits to facilitate energy efficiency opportunities. This study reports on a state government program in Victoria, Australia, where the uptake of such offerings was lower than expected, prompting the program team to consider whether targeting facilities managers (FMs), rather than building owners, might be a better way of delivering the program. The influences and practices of FMs that impact on their ability to be advocates for energy efficiency were explored. The results revealed that complex building ownership arrangements, poor communication skills, isolation from key decision making processes, a lack of credible business cases and information, split incentives, and the prospect of business disruptions can all impact on FMs' ability to drive organizational change. Future program efforts should continue to interrogate the social context of retrofits in mid-tier buildings, including other influences and influencers beyond FMs, and adapt accordingly.

C1 [Curtis, Jim] Monash Univ, BehaviourWorks Australia, Monash Sustainable Dev Inst, 8 Scen Blvd, Clayton, Vic 3800, Australia.

[Walton, Andrea] CSIRO, 41 Boggo Rd, Dutton Pk, Qld 4102, Australia.

[Dodd, Michael] Dept Ind Innovat & Sci, 10 Binara St, Canberra, ACT 2600, Australia.

RP Curtis, J (reprint author), Monash Univ, BehaviourWorks Australia, Monash Sustainable Dev Inst, 8 Scen Blvd, Clayton, Vic 3800, Australia.

EM james.curtis@monash.edu

RI Walton, Andrea/H-1985-2013

OI Walton, Andrea/0000-0001-5483-6397

FU Sustainability Victoria

FX The authors would like to thank the Facility Management Association of Australia for assisting with the research and providing feedback on drafts of this paper. We also wish to thank Sustainability Victoria for funding this research.

CR Braun V., 2007, QUALITATIVE RES PSYC, V3, P77, DOI DOI 10.1191/1478088706QP0630A  
 Eichholtz P, 2010, AM ECON REV, V100, P2492, DOI 10.1257/aer.100.5.2492  
 Elmualim A., 2012, INT J SUSTAIN BUILT, V1, P16, DOI DOI 10.1016/j.IJSBE.2012.03.001  
 Elmualim A, 2010, BUILD ENVIRON, V45, P58, DOI 10.1016/j.buildenv.2009.05.002  
 FMA, 2014, FMA ANN REP 2013 14  
 Frederiks ER, 2015, RENEW SUST ENERG REV, V41, P1385, DOI 10.1016/j.rser.2014.09.026  
 Funnell S.C., 2011, PURPOSEFUL PROGRAM T  
 Goulden M, 2015, ENERG POLICY, V85, P280, DOI 10.1016/j.enpol.2015.06.014  
 Green Building Council of Australia, 2015, MIDT COMM OFF BUILD  
 Hanger I., 2014, REPORT ROYAL COMMISS  
 Higgins A, 2014, ENERG POLICY, V65, P501, DOI 10.1016/j.enpol.2013.10.041  
 Hou J, 2016, ENERG POLICY, V88, P204, DOI 10.1016/j.enpol.2015.10.016  
 Howard-Grenville J., 2012, OXFORD HDB BUSINESS, P194  
 Jensen PA, 2012, FACILITIES, V30, P199, DOI 10.1108/02632771211208486  
 Marquez L., 2012, BARRIERS ADOPTION EN  
 Michie S, 2011, IMPLEMENT SCI, V6, DOI 10.1186/1748-5908-6-42  
 Miller E, 2008, J PROP INVEST FINANC, V26, P552, DOI 10.1108/14635780810908398  
 Palm J, 2010, APPL ENERG, V87, P3255, DOI 10.1016/j.apenergy.2010.04.019  
 Parker C, 2011, EXPLAINING COMPLIANCE: BUSINESS RESPONSES TO REGULATION, P1, DOI 10.1080/03004430.2010.533268  
 Pathirage C, 2008, J FACIL MANAG, V6, P5, DOI 10.1108/14725960810847431  
 PESCHANSKI VV, 1985, ACTA SOCIOL, V28, P243, DOI 10.1177/000169938502800306  
 Pitt M., 2001, FACILITIES, V19, P304  
 Rist L, 2013, ECOL SOC, V18, DOI 10.5751/ES-06183-180463  
 Schleich J, 2008, ENERG ECON, V30, P449, DOI 10.1016/j.eneco.2006.08.004  
 Scupola A, 2012, J FACIL MANAG, V10, P198, DOI 10.1108/14725961211246009  
 Seidman Irving, 2013, INTERVIEWING QUALITA  
 Shah S., 2007, SUSTAINABLE PRACTICE

Shove E, 1998, ENER POLICY, V26, P1105, DOI 10.1016/S0301-4215(98)00065-2  
 Shove E., 2012, DYNAMICS SOCIAL PRAC  
 Simons R.A, 2014, J SUSTAINABLE REAL E, V6, p,  
 Stake RE, 2010, QUALITATIVE RES STUD  
 Sustainability Victoria, 2014, SMARTER RESOURCES SM  
 Tanaka K, 2011, ENER POLICY, V39, P6532, DOI 10.1016/j.enpol.2011.07.058  
 Trianni A, 2014, APPL ENER, V118, P207, DOI 10.1016/j.apenergy.2013.12.042  
 Whyte WF, 1945, APPL ANTHROPOL, V4, P1  
 Winter SC, 2001, J POLICY ANAL MANAG, V20, P675, DOI 10.1002/pam.1023  
 Wray DE, 1949, AM J SOCIOL, V54, P298, DOI 10.1086/220365

NR 37

TC 2

Z9 2

U1 7

U2 13

PU ELSEVIER SCI LTD

PI OXFORD

PA THE BOULEVARD, LANGFORD LANE, KIDLINGTON, OXFORD OX5 1GB, OXON, ENGLAND

SN 0301-4215

EI 1873-6777

J9 ENER POLICY

JI Energy Policy

PD APR

PY 2017

VL 103

BP 98

EP 104

DI 10.1016/j.enpol.2017.01.016

PG 7

WC Economics; Energy &amp; Fuels; Environmental Sciences; Environmental Studies

SC Business &amp; Economics; Energy &amp; Fuels; Environmental Sciences &amp; Ecology

GA EP4NA

UT WOS:000397356000008

DA 2018-05-03

ER

PT J

AU Girod, B

Stucki, T

Woerter, M

AF Girod, Bastien

Stucki, Tobias

Woerter, Martin

TI How do policies for efficient energy use in the household sector induce  
 energy-efficiency innovation? An evaluation of European countries

SO ENERGY POLICY

LA English

DT Article

DE Policy evaluation; Energy efficiency; Technological change; Demand-pull

ID ENVIRONMENTAL-POLICY; TECHNOLOGICAL-CHANGE; PRODUCTIVITY GROWTH;

PANEL-DATA; CONSERVATION; PATENTS; MODELS; HYPOTHESIS; DIFFUSION;

PROGRAMS

AB Research on innovation induced by climate-mitigation policy has been focused predominantly on the supply side of the energy system. Despite considerable climate-mitigation potential on the demand side, less attention is given to the innovation effect of policies addressing the household sector. Based on a comprehensive data set, including 550 policy measures over 30 years (1980-2009) and covering 21 European countries, we find based on econometric estimations that policies targeting efficient energy use in the household sector significantly increase the number of patented energy-efficiency inventions. A

comparison of the different policy types reveals a particularly strong influence from financial subsidies and energy labels. The results indicate that policies supporting early market adoption of energy-efficient technologies are effective in fostering innovation.

C1 [Girod, Bastien] Swiss Fed Inst Technol, Dept Management Technol & Econ, Weinbergstr 62, CH-8032 Zurich, Switzerland.

[Stucki, Tobias] Univ Jyväskylä, Dept Business & Econ, Mattilanniemi 2, FIN-40014 Jyväskylä, Finland.

[Woerter, Martin] Swiss Fed Inst Technol, KOF Swiss Econ Inst, Dept Management Technol & Econ, Leonhardstr 21, CH-8092 Zurich, Switzerland.

RP Girod, B (reprint author), Swiss Fed Inst Technol, Dept Management Technol & Econ, Weinbergstr 62, CH-8032 Zurich, Switzerland.

EM bgirod@ethz.ch

OI Stucki, Tobias/0000-0002-2400-0107

CR Aghion P., 2012, CARBON TAXES PATH DE

Allison PD, 2002, SOCIOL METHODOL, V32, P247, DOI 10.1111/1467-9531.00117

Ambec S, 2013, REV ENV ECON POLICY, V7, P2, DOI 10.1093/reep/res016

Anderson ST, 2004, RESOUR ENERGY ECON, V26, P27, DOI 10.1016/j.reseneeco.2003.07.001

Arrow Kenneth J., 1962, RATE DIRECTION INVEN, P609, DOI DOI 10.1515/9781400879762

Bloom N, 2002, ECON J, V112, pC97, DOI 10.1111/1468-0297.00022

[Anonymous], 2011, EUR BUILD MICR

Brounen D, 2013, ENERG ECON, V38, P42, DOI 10.1016/j.eneco.2013.02.008

COCKBURN I, 1988, AM ECON REV, V78, P419

Costantini V., 2015, GREEN ENERGY EFFIC

Eberhardt M, 2012, STATA J, V12, P61

Gillingham K., 2009, NBER WORK PAP SER

Gillingham K., 2004, RESOURCES OF FUTURE

Girod B, 2016, J CLEAN PROD, V128, P209, DOI 10.1016/j.jclepro.2015.07.010

GORT M, 1982, ECON J, V92, P630, DOI 10.2307/2232554

GRILICHES Z, 1990, J ECON LIT, V28, P1661

GRILICHES Z, 1979, BELL J ECON, V10, P92, DOI 10.2307/3003321

Guellec D, 2004, OXFORD B ECON STAT, V66, P353, DOI 10.1111/j.1468-0084.2004.00083.x

Hall BH, 2005, RAND J ECON, V36, P16

HASSETT KA, 1995, J PUBLIC ECON, V57, P201, DOI 10.1016/0047-2727(94)01452-T

Hoppmann J, 2013, RES POLICY, V42, P989, DOI 10.1016/j.respol.2013.01.002

Howarth RB, 2000, ENERG POLICY, V28, P477

JAFFE AB, 1994, ENERG POLICY, V22, P804, DOI 10.1016/0301-4215(94)90138-4

Jaffe AB, 2005, ECOL ECON, V54, P164, DOI 10.1016/j.ecolecon.2004.12.027

JAFFE AB, 1995, J ENVIRON ECON MANAG, V29, pS43, DOI 10.1006/jeeem.1995.1060

Jaffe AB, 2002, ENVIRON RESOUR ECON, V22, P41, DOI 10.1023/A:1015519401088

Jaffe AB, 1997, REV ECON STAT, V79, P610, DOI 10.1162/003465397557196

Jaffe A.B., 1993, RESOUR ENERGY EC

Johnstone N, 2010, ENVIRON RESOUR ECON, V45, P133, DOI 10.1007/s10640-009-9309-1

Keller W, 2002, AM ECON REV, V92, P120, DOI 10.1257/000282802760015630

Kemp R, 2011, ECOL ECON, V72, P28, DOI 10.1016/j.ecolecon.2011.09.014

Lybbert TJ, 2014, RES POLICY, V43, P530, DOI 10.1016/j.respol.2013.09.001

Marin G, 2014, RES POLICY, V43, P301, DOI 10.1016/j.respol.2013.10.015

MOULTON BR, 1990, REV ECON STAT, V72, P334, DOI 10.2307/2109724

Nemet GF, 2009, RES POLICY, V38, P700, DOI 10.1016/j.respol.2009.01.004

Newell RG, 1999, Q J ECON, V114, P941, DOI 10.1162/003355399556188

Noailly J, 2011, ENERG ECON, V34, P795

Nordhaus W, 2011, ENERG ECON, V33, P665, DOI 10.1016/j.eneco.2010.08.005

OECD, 2012, IND ENV TECHN ENV TE

Popp D, 2010, HBK ECON, V2, P873, DOI 10.1016/S0169-7218(10)02005-8

Rogge KS, 2013, MORE COMPREHENSIVE P

Sammer K, 2006, BUSINESS STRATEGY EN, V15, P185, DOI DOI 10.1002/BSE.522

Schlomann B., 2012, ENERGY EFFICIENCY PO

Schmoch U., 2003, LINKING TECHNOLOGY A, P1

SHAMA A, 1983, ENERG POLICY, V11, P148, DOI 10.1016/0301-4215(83)90027-7

Soltmann C, 2015, ENVIRON RESOUR ECON, V62, P457, DOI 10.1007/s10640-014-9824-6

Stern PC, 2011, AM PSYCHOL, V66, P303, DOI 10.1037/a0023235  
TRAIN K, 1985, ENERGY, V10, P1243, DOI 10.1016/0360-5442(85)90135-5  
Wilson C, 2007, ANNU REV ENV RESOUR, V32, P169, DOI 10.1146/annurev.energy.32.053006.141137  
Wilson C, 2012, NAT CLIM CHANGE, V2, P780, DOI 10.1038/NCLIMATE1576

NR 50

TC 2

Z9 2

U1 3

U2 13

PU ELSEVIER SCI LTD

PI OXFORD

PA THE BOULEVARD, LANGFORD LANE, KIDLINGTON, OXFORD OX5 1GB, OXON, ENGLAND

SN 0301-4215

EI 1873-6777

J9 ENERG POLICY

JI Energy Policy

PD APR

PY 2017

VL 103

BP 223

EP 237

DI 10.1016/j.enpol.2016.12.054

PG 15

WC Economics; Energy & Fuels; Environmental Sciences; Environmental Studies

SC Business & Economics; Energy & Fuels; Environmental Sciences & Ecology

GA EP4NA

UT WOS:000397356000018

DA 2018-05-03

ER

PT J

AU Seebauer, S

Wolf, A

AF Seebauer, Sebastian

Wolf, Angelika

TI Disentangling household and individual actors in explaining private  
electricity consumption

SO ENERGY EFFICIENCY

LA English

DT Article

DE Conservation behaviour; Energy saving; Intra-household interaction;  
Explanatory model; Regression analysis

ID PLANNED BEHAVIOR; ENERGY-CONSERVATION; PAST BEHAVIOR; HABIT;  
DETERMINANTS; INTENTIONS

AB Previous research often regard household and individual as synonymous actors, although the overall household electricity consumption is the aggregate of diverging actions by individual household members. We disentangle the impact of actor-specific predictors on household and individual electricity consumption, employing regression models to data of 204 Austrian multi-person households. Predictors add more to the explained variance of household and individual electricity consumption if they are located at the same actor level as the dependent variable. While household electricity consumption is best predicted by the household context and value/knowledge factors, individual electricity consumption depends foremost on habit and whether a person stays at home during the day. The study exemplifies that future research and interventions need to decompose actor levels to better understand and target the drivers of private electricity consumption. Methodological challenges in measuring individual and household consumption behaviour are discussed.

C1 [Seebauer, Sebastian; Wolf, Angelika] Graz Univ, Wegener Ctr Climate & Global Change, Brandhofgasse 5, A-8010 Graz, Austria.

RP Seebauer, S (reprint author), Graz Univ, Wegener Ctr Climate & Global Change, Brandhofgasse 5, A-8010 Graz, Austria.

EM sebastian.seebauer@uni-graz.at

OI Seebauer, Sebastian/0000-0003-4592-9529

FU University of Graz; Austrian Climate and Energy Fund

FX Open access funding provided by University of Graz. This work was funded by the Austrian Climate and Energy Fund and was conducted in the program 'New Energies 2020. Grateful thanks go to two anonymous reviewers for valuable comments.

- CR Aarts H, 1998, J APPL SOC PSYCHOL, V28, P1355, DOI 10.1111/j.1559-1816.1998.tb01681.x  
 Abrahamse W, 2005, J ENVIRON PSYCHOL, V25, P273, DOI 10.1016/j.jenvp.2005.08.002  
 Abrahamse W, 2009, J ECON PSYCHOL, V30, P711, DOI 10.1016/j.joep.2009.05.006  
 AJZEN I, 1991, ORGAN BEHAV HUM DEC, V50, P179, DOI 10.1016/0749-5978(91)90020-T  
 Amburgey JW, 2012, ENVIRON BEHAV, V44, P235, DOI 10.1177/0013916511402064  
 Armitage CJ, 2001, BRIT J SOC PSYCHOL, V40, P471, DOI 10.1348/014466601164939  
 Bamberg S, 2003, BASIC APPL SOC PSYCH, V25, P175, DOI 10.1207/S15324834BASP2503\_01  
 Barr S, 2005, ENERG POLICY, V33, P1425, DOI 10.1016/j.enpol.2003.12.016  
 Bartiaux F, 2008, J CLEAN PROD, V16, P1170, DOI 10.1016/j.jclepro.2007.08.013  
 Benders RMT, 2006, ENERG POLICY, V34, P3612, DOI 10.1016/j.enpol.2005.08.005  
 Bertoldi P., 2009, 24005 EUR EN EUR COM  
 Bertoldi P., 2007, 22753EN EUR EUR COMM  
 Bortz J., 2006, FORSCHUNGSMETHODEN E  
 Carlsson-Kanyama A, 2007, ENERG POLICY, V35, P2163, DOI 10.1016/j.enpol.2006.06.018  
 Clark CF, 2003, J ENVIRON PSYCHOL, V23, P237, DOI 10.1016/S0272-4944(03)00105-6  
 Cohen C, 2005, ENERG POLICY, V33, P555, DOI 10.1016/j.enpol.2003.08.021  
 de Vries P, 2011, ENVIRON BEHAV, V43, P612, DOI 10.1177/0013916510369630  
 Dunlap RE, 2008, J ENVIRON EDUC, V40, P3, DOI 10.3200/JOEE.40.1.3-18  
 EEA, 2012, CONS ENV 2012 UPD EU  
 Fischer C., 2007, ECEEE SUMMER STUDY S  
 Fischer C, 2008, ENERG EFFIC, V1, P79, DOI 10.1007/s12053-008-9009-7  
 Frick J, 2004, PERS INDIV DIFFER, V37, P1597, DOI 10.1016/j.paid.2004.02.015  
 Frick J., 2003, THESIS  
 Fujii S, 2003, TRANSPORTATION, V30, P81, DOI 10.1023/A:1021234607980  
 Gatersleben B, 2002, ENVIRON BEHAV, V34, P335, DOI 10.1177/0013916502034003004  
 Gronhoj A., 2007, J CONSUM BEHAV, V6, P218, DOI DOI 10.1002/CB.2L6  
 Gronhoj A, 2009, J ENVIRON PSYCHOL, V29, P414, DOI 10.1016/j.jenvp.2009.05.002  
 Hurrelmann K, 2008, HDB SOZIALISATIONSFO  
 Kaiser FG, 2005, J APPL SOC PSYCHOL, V35, P2150, DOI 10.1111/j.1559-1816.2005.tb02213.x  
 Kang HJ, 2011, TRANSPORTATION, V38, P81, DOI 10.1007/s11116-010-9292-y  
 Knussen C, 2008, ENVIRON BEHAV, V40, P683, DOI 10.1177/0013916507307527  
 Longhi S., 2013, ISER WORKING PAPER S  
 Manly C., 2014, RES HIGH EDUC, DOI [10.1007/s11162-014-9344-9, DOI 10.1007/S11162-014-9344-9.]  
 Newton P, 2012, ENVIRON BEHAV, V44, P107, DOI 10.1177/0013916510390494  
 Piskernik L., 2007, THESIS  
 Poortinga W., 2004, ENVIRON BEHAV, V36  
 Sanquist TF, 2012, ENERG POLICY, V42, P354, DOI 10.1016/j.enpol.2011.11.092  
 Sardianou E, 2007, ENERG POLICY, V35, P3778, DOI 10.1016/j.enpol.2007.01.020  
 Schwartz, 1977, ADV EXPT SOCIAL PSYC, V10, P221  
 Schweighart M., 2014, 28 INT C APPL PSYCH  
 Statistics Austria, 2010, INC POV LIV COND 201  
 Statistics Austria, 2013, EL GAS J 2012 EL GAS  
 Statistics Austria, 2011, MOD EL CONS PRIV HOU  
 Stern PC, 2000, J SOC ISSUES, V56, P407, DOI 10.1111/0022-4537.00175  
 Stern P. C., 1999, HUMAN ECOLOGY REV, V6, P81, DOI DOI 10.2307/2083693  
 Thøgersen J, 2002, J ECON PSYCHOL, V23, P605, DOI 10.1016/S0167-4870(02)00120-4  
 Thøgersen J, 2010, ENERG POLICY, V38, P7732, DOI 10.1016/j.enpol.2010.08.025  
 Verplanken B, 2003, J APPL SOC PSYCHOL, V33, P1313, DOI 10.1111/j.1559-1816.2003.tb01951.x  
 Verplanken B, 2006, BRIT J SOC PSYCHOL, V45, P639, DOI 10.1348/014466605X49122

Whitmarsh L, 2009, J ENVIRON PSYCHOL, V29, P13, DOI 10.1016/j.jenvp.2008.05.003

Wiesmann D, 2011, ENERG POLICY, V39, P2772, DOI 10.1016/j.enpol.2011.02.047

Yohanis YG, 2008, ENERG BUILDINGS, V40, P1053, DOI 10.1016/j.enbuild.2007.09.001

NR 52

TC 2

Z9 2

U1 3

U2 5

PU SPRINGER

PI DORDRECHT

PA VAN GODEWIJCKSTRAAT 30, 3311 GZ DORDRECHT, NETHERLANDS

SN 1570-646X

EI 1570-6478

J9 ENERG EFFIC

JI Energy Effic.

PD FEB

PY 2017

VL 10

IS 1

BP 1

EP 20

DI 10.1007/s12053-016-9435-x

PG 20

WC GREEN & SUSTAINABLE SCIENCE & TECHNOLOGY; Energy & Fuels; Environmental Studies

SC Science & Technology - Other Topics; Energy & Fuels; Environmental Sciences & Ecology

GA EK9SB

UT WOS:000394263100001

OA gold

DA 2018-05-03

ER

PT J

AU Lim, TH

De Kleine, RD

Keoleian, GA

AF Lim, Tae Hwan

De Kleine, Robert D.

Keoleian, Gregory A.

TI Energy use and carbon reduction potentials from residential ground source heat pumps considering spatial and economic barriers

SO ENERGY AND BUILDINGS

LA English

DT Article

DE Heat pump; HVAC; Market penetration; Energy efficiency; GHG abatement; Retrofit; Residential building

AB Ground source heat pump (GSHP) systems are significantly more energy efficient than conventional heating and cooling systems, but they have suffered from low market penetration. This study analyzes the implications of and barriers to nation-wide GSHP retrofits in U.S. single-family houses based on national databases of housing units and home energy use. Our model estimates maximum annual savings of 1.26 quads (1.33 EJ) of energy, \$7.1 billion in energy costs, and abatement of 64.8 million tons of CO<sub>2</sub>eq. Economics is the major barrier as typical GSHPs cost \$164 less to operate annually but cost \$8990 more to install than the conventional alternative HVAC systems. Spatial and economic constraints exclude 7.7% and 89% of homes respectively, leaving only 10% of homes suitable for retrofit. Applying these two constraints, savings reduce to 0.15 quads (0.16 EJ), \$3.0 billion in energy costs, and abatement of 12.1 million tons of CO<sub>2</sub>eq. A 30% federal tax credit helps increase the percentage of GSHP-suitable homes from 10% to 30% while reducing the average payback period from 9.1 to 4.8 years among those homes.

More effective policies to lower high cost premiums would be needed to promote large-scale GSHP implementations. (C) 2016 Elsevier B.V. All rights reserved.

C1 [Lim, Tae Hwan; De Kleine, Robert D.; Keoleian, Gregory A.] Univ Michigan, Sch Nat Resources & Environm, Ctr Sustainable Syst, Ann Arbor, MI 48109 USA.

RP Keoleian, GA (reprint author), Univ Michigan, Sch Nat Resources & Environm, Ctr Sustainable Syst, Ann Arbor, MI 48109 USA.

EM gregak@umich.edu

OI Lim, Tae Hwan/0000-0003-3764-2253; De Kleine, Robert/0000-0002-6510-9336

CR Bloomquist R.G., 2001, P C GEOTH EN UND MIN

Blumsack S., 2009, P 42 HAW INT C SYST

Briley C., 2010, GROUND SOURCE HEAT 3

Central Air Conditioner Prices, 2015, COST COMP BRANDS SIZ

Cribley Drilling Company, 2014, COMMUNICATION

Cummings P., 2008, INDIANA RESIDENTIAL

Curtis R., 2005, GROUND SOURCE HEAT P

Michigan Energy Services Inc, 2014, COMMUNICATION

Deru M, 2007, SOURCE ENERGY EMISSI

Database of State Incentives for Renewables & Efficiency (DSIRE), 2014, INC POL STAT INC POL

Database of State Incentives for Renewables & Efficiency (DSIRE), 2014, PACE FIN

Earth River Geothermal, 2015, GEOTH HVAC SYST DEPT

Energy Design Update (EDU), 2013, PRACT TAK STOCK HEAT

Office of Energy Efficiency and Renewable Energy (EERE), 2014, RES FURN BOIL APPL C

Office of Energy Efficiency and Renewable Energy (EERE), 2014, RES CENTR AIR COND H

Office of Energy Efficiency and Renewable Energy (EERE), 2014, RES DIR HEAT EQ APPL

Office of Energy Efficiency and Renewable Energy (EERE), 2014, RES ROOM AIR COND AP

Egg J, 2011, GEOTHERMAL HVAC GREE

Furnace Price Guides, 2015, COMP FURN PRIC OIL E

Hackel S., 2009, 10 YEAR UPDATE EMISS

Healy PF, 1997, INT J ENERG RES, V21, P857, DOI 10.1002/(SICI)1099-114X(199708)21:10<857::AID-ER279>3.0.CO;2-1

Home Advisor, 2014, HEAT COOL COST GUID

Hughes P.J., 2008, GEOTHERMAL GROUND SO

Kavanaugh S., 2012, ASHRAE J, V54, P10

Kavanaugh S., 1995, COST CONTAINME UNPUB

Kilpatrick J., 1993, GROUND SOURCE HEAT P

Klaassen C., 2006, GEOTHERMAL HEAT PUMP

Lienau P.J., 1995, GROUND SOURCE HEAT P

Liu X., 2010, ASSESSMENT NATL BENE

Lloyd D.B., 2015, GEO POWER STAY WARM

Logue J.M., 2013, ENERGY IMPACTS ENVEL

Sanner B., 2004, GHC B

Lund JW, 2015, P WORLD GEOTH C 2015, P19

Minnesota Department of Commerce (MDC), 2008, PERFORMANCE

Mills E., 2005, HOME ENERGY SAVER DO

[Anonymous], 2011, GOV REG IMP MOD ROOM

Omer A., 2006, RENEW SUST ENERG REV, V12, P344

Saner D, 2010, RENEW SUST ENERG REV, V14, P1798, DOI 10.1016/j.rser.2010.04.002

Office of the Secretary of Defense (SOD), 2007, REP C GROUND SOURC H, VOffice of the Deputy under Secretary of Defense (Installations and Environment)

Stein JR, 1997, MONITORED ENERGY USE

U.S. Airconditioning Distributors, 2008, HVAC EQ SIZ FIND

U. S. Census Bureau, 2015, NEW RES CONSTR

U.S. Census Bureau, 2014, HIST CENS HOUS TABL

U.S. Department of Energy (DOE), 2010, BUILD AM BEST PRACT, P34

U.S. Department of Energy (DOE), 1990, REN EN EXC SUPP AN N

U.S. Department of Energy (DOE), 2011, TECHN SUPP DOC EN EF

U.S. Department of Energy (DOE), 2010, TECHN SUPP DOC EN CO

U.S. Energy Information Administration (EIA), 2012, ANN EN REV 2011

Energy Information and Administration (EIA), 2013, ANN EN OUTL 2013  
U.S. Energy Information Agency (EIA), 2015, NAT GAS PRIC  
U.S. Energy Information Administration (EIA), 2015, RES HEAT OIL WEEKL H  
U.S. Energy Information Administration (EIA), 2015, US KER WHOL RES PRIC  
EPA, 2012, EM GEN RES INT DAT E  
Wang M., 2010, GREET 1 1 8D 1  
WebHVAC, 2015, HVAC PRIC LISTS  
[Anonymous], 2014, BUILD EN DAT BOOK  
[Anonymous], 2014, BUILD EN DAT BOOK  
[Anonymous], 2014, BUILD EN DAT BOOK  
NR 58  
TC 2  
Z9 2  
U1 3  
U2 12  
PU ELSEVIER SCIENCE SA  
PI LAUSANNE  
PA PO BOX 564, 1001 LAUSANNE, SWITZERLAND  
SN 0378-7788  
EI 1872-6178  
J9 ENERG BUILDINGS  
JI Energy Build.  
PD SEP 15  
PY 2016  
VL 128  
BP 287  
EP 304  
DI 10.1016/j.enbuild.2016.06.060  
PG 18  
WC Construction & Building Technology; Energy & Fuels; Engineering, Civil  
SC Construction & Building Technology; Energy & Fuels; Engineering  
GA DV3AU  
UT WOS:000382794200024  
DA 2018-05-03  
ER  
  
PT J  
AU Boomsma, C  
    Goodhew, J  
    Pahl, S  
    Jones, RV  
AF Boomsma, Christine  
    Goodhew, Julie  
    Pahl, Sabine  
    Jones, Rory V.  
TI The feasibility of saving energy in challenging organisational contexts:  
    Testing energy visualisation in a social services office in the United  
    Kingdom  
SO ENERGY RESEARCH & SOCIAL SCIENCE  
LA English  
DT Article  
DE Energy use; Feedback; Visualisation; Workplace behaviour  
ID RESEARCH AGENDA; CLIMATE-CHANGE; FEEDBACK; BEHAVIOR; CONSERVATION;  
    CONSUMPTION; ENGAGEMENT; FIELD; REDUCTION; VIVIDNESS  
AB The workplace offers opportunities for energy savings, but few studies have evaluated the effect of  
    energy feedback in offices. This paper reports a case study of an energy visualisation intervention among  
    social care staff. The research examined the role of feedback design (simple graphs vs. visualisation) and  
    discusses the feasibility of implementing a near real-time visual feedback intervention into a work setting



with staff keenly aware of their primary job roles. The findings show a staff sample with positive beliefs towards energy saving, but bounded by low feelings of self-efficacy, weak social norms, and perceived barriers in the office. Feedback may have supported feelings of collective efficacy and encouraged staff to talk with colleagues about ways to save energy. But engagement with feedback - and energy use in general - was limited. Energy use was embedded in other concerns and issues, such as a strong team culture and wider problems in the building. The case study highlights the complexities of energy-related behaviours in the workplace and the role visualising energy could play in this context. Engagement will be a key challenge in achieving successful feedback initiatives; we provide recommendations to tackle this challenge and identify areas for future research. (C) 2016 Elsevier Ltd. All rights reserved.

C1 [Boomsma, Christine; Goodhew, Julie; Pahl, Sabine] Univ Plymouth, Sch Psychol, Portland Sq, Plymouth PL4 8AA, Devon, England.

[Jones, Rory V.] Univ Plymouth, Sch Architecture Design & Environm, Roland Levinsky Bldg, Plymouth PL4 8AA, Devon, England.

RP Boomsma, C (reprint author), Univ Plymouth, Sch Psychol, Portland Sq, Plymouth PL4 8AA, Devon, England.

EM christine.boomsma@plymouth.ac.uk; julie.goodhew@plymouth.ac.uk;  
sabine.pahl@plymouth.ac.uk; rory.jones@plymouth.ac.uk

FU eViz Project, a consortium of four UK universities; Engineering and Physical Sciences Research Council [EP/K002465/1]

FX The electricity monitoring set-up and data used in this study were provided by William Box at Carnego Systems. The authors would also like to thank Alex Hurth and Clare Mains for their help in setting up the field study. This research was funded through the eViz Project, a consortium of four UK universities (eviz.org.uk) funded by the Engineering and Physical Sciences Research Council under Transforming Energy Demand in Buildings through Digital Innovation (TEDDI) [grant number EP/K002465/1].

CR Abrahamse W, 2005, J ENVIRON PSYCHOL, V25, P273, DOI 10.1016/j.jenvp.2005.08.002  
Andrade J., 2012, J EXP PSYCHOPATHOL, V3, P127, DOI DOI 10.5127/JEP.024611  
Andrews RNL, 2016, ENERGY RES SOC SCI, V11, P195, DOI 10.1016/j.erss.2015.09.001  
[Anonymous], 2012, EU AUST DRIV COUNTR  
Boomsma C., 2013, THESIS  
Bowden F., 2014, P IAEA 2014 C INT AS  
Brandon G, 1999, J ENVIRON PSYCHOL, V19, P75, DOI 10.1006/jevp.1998.0105  
Braun V., 2007, QUALITATIVE RES PSYC, V3, P77, DOI DOI 10.1191/1478088706QP0630A  
Bryman A, 2006, QUALITATIVE RES, V6, P97, DOI DOI 10.1177/1468794106058877  
Buchanan K, 2015, ENER POLICY, V77, P89, DOI 10.1016/j.enpol.2014.12.008  
Bull R., 2012, SEEING ENERGY DIFFER  
Bull R, 2015, ENERGY RES SOC SCI, V8, P32, DOI 10.1016/j.erss.2015.04.006  
Burgess J, 2008, ENER POLICY, V36, P4454, DOI 10.1016/j.enpol.2008.09.039  
Carrico AR, 2011, J ENVIRON PSYCHOL, V31, P1, DOI 10.1016/j.jenvp.2010.11.004  
Chen HM, 2012, ENER BUILDINGS, V45, P106, DOI 10.1016/j.enbuild.2011.10.029  
Clayton S, 2016, AM PSYCHOL, V71, P199, DOI 10.1037/a0039482  
Coleman MJ, 2013, BUILD RES INF, V41, P637, DOI 10.1080/09613218.2013.808958  
Darby S, 2006, EFFECTIVENESS FEEDBA  
Darby S, 2008, BUILD RES INF, V36, P499, DOI 10.1080/0961321802028428  
Darby S, 2010, BUILD RES INF, V38, P442, DOI 10.1080/09613218.2010.492660  
DECC, 2014, UK NAT EN EFF ACT PL  
Deline MB, 2015, ENERGY RES SOC SCI, V8, P207, DOI 10.1016/j.erss.2015.06.003  
ECEEE, 2013, STEER MAZ 6 GUID ECE  
European Environment Agency, 2015, FIN EN CONS SECT FUE  
Fischer C, 2008, ENER EFFIC, V1, P79, DOI 10.1007/s12053-008-9009-7  
Greaves M, 2013, J ENVIRON PSYCHOL, V34, P109, DOI 10.1016/j.jenvp.2013.02.003  
Hargreaves T., 2010, 141 TYND CTR CLIM CH  
Hargreaves T, 2013, ENER POLICY, V52, P126, DOI 10.1016/j.enpol.2012.03.027  
Hargreaves T, 2010, ENER POLICY, V38, P6111, DOI 10.1016/j.enpol.2010.05.068  
Holmes EA, 2010, CLIN PSYCHOL REV, V30, P349, DOI 10.1016/j.cpr.2010.01.001  
IEA DSM, 2015, TASK 24 PHAS 1 CLOS

LINVILLE PW, 1991, J PERS SOC PSYCHOL, V60, P5, DOI 10.1037/0022-3514.60.1.5  
 Matthies E., 2011, J ENV STUDIES SCI, V1, P241  
 Muller A., 2014, LONDON SCH EC PO OCT  
 Murtagh N, 2014, PLOS ONE, V9, DOI 10.1371/journal.pone.0092019  
 Murtagh N, 2013, ENERG POLICY, V62, P717, DOI 10.1016/j.enpol.2013.07.090  
 Nicholson-Cole S. A., 2005, COMPUT ENV URBAN SYS, V29, P225  
 Nolan JM, 2008, PERS SOC PSYCHOL B, V34, P913, DOI 10.1177/0146167208316691  
 Novum/ANP, 2013, GEM WACHT MILJ  
 O'Neill SJ, 2013, GLOBAL ENVIRON CHANG, V23, P413, DOI 10.1016/j.gloenvcha.2012.11.006  
 Pereira L., 2012, P 4 ACM SIGCHI S ENG, P221  
 Pierce James, 2008, P 20 AUSTR C COMP HU, P1  
 Sheppard SRJ, 2005, ENVIRON SCI POLICY, V8, P637, DOI 10.1016/j.envsci.2005.08.002  
 Siero FW, 1996, J ENVIRON PSYCHOL, V16, P235, DOI 10.1006/jevp.1996.0019  
 Smith AM, 2012, J MARKET MANAG, V28, P469, DOI 10.1080/0267257X.2012.658837  
 Smith SM, 2000, PERS SOC PSYCHOL B, V26, P769, DOI 10.1177/0146167200269003  
 Sovacool BK, 2014, ENERGY RES SOC SCI, V1, P1, DOI 10.1016/j.erss.2014.02.003  
 Steg L, 2008, ENERG POLICY, V36, P4449, DOI 10.1016/j.enpol.2008.09.027  
 TAYLOR SE, 1982, PSYCHOL REV, V89, P155, DOI 10.1037/0033-295X.89.2.155  
 Thøgersen J., 2005, J CONSUMER POLICY, V28, P143, DOI DOI 10.1007/S10603-005-2982-8  
 Thøgersen J, 2010, ENERG POLICY, V38, P7732, DOI 10.1016/j.enpol.2010.08.025  
 van Dam SS, 2010, BUILD RES INF, V38, P458, DOI 10.1080/09613218.2010.494832  
 ZAJONC RB, 1984, AM PSYCHOL, V39, P117, DOI 10.1037/0003-066X.39.2.117

NR 53

TC 2

Z9 2

U1 1

U2 9

PU ELSEVIER SCIENCE BV

PI AMSTERDAM

PA PO BOX 211, 1000 AE AMSTERDAM, NETHERLANDS

SN 2214-6296

EI 2214-6326

J9 ENERGY RES SOC SCI

JI Energy Res. Soc. Sci.

PD MAY

PY 2016

VL 15

BP 58

EP 74

DI 10.1016/j.erss.2016.02.004

PG 17

WC Environmental Studies

SC Environmental Sciences & Ecology

GA DQ8BY

UT WOS:000379435300005

DA 2018-05-03

ER

PT J

AU Braungardt, S

Elsland, R

Eichhammer, W

AF Braungardt, Sibylle

Elsland, Rainer

Eichhammer, Wolfgang

TI The environmental impact of eco-innovations: the case of EU residential electricity use

SO ENVIRONMENTAL ECONOMICS AND POLICY STUDIES

LA English

DT Article

DE Environmental innovation; Energy efficiency; Environmental impact of innovation; Energy modelling

ID ENERGY EFFICIENCY

AB Even though environmental innovations are generally considered a key element towards a green growth strategy, especially for the case of energy efficiency innovations, the impact on climate goals has been subject to a long-running debate. On the one hand, energy efficiency innovations provide a huge cost-effective CO<sub>2</sub> reduction potential. On the other hand, increasing energy efficiency implies cost reductions which in turn may lead to increased consumption due to the so-called rebound effect. Our study investigates the long-term environmental impact of energy efficiency innovations on the EU-27 residential electricity demand (excluding heating systems) using a detailed bottom-up modelling approach. Assuming a rebound effect of 10 %, we show that the diffusion of energy efficiency technologies with current policy levels provides savings of around 140 TWh and additional 270 TWh may be saved through additional policy measures accelerating the diffusion and development of new technologies until 2030. By contrast, assuming a (rather pessimistic) rebound effect of 40 %, the savings are reduced to around 95 and 180 TWh until 2030, respectively. We conclude that there is a clear case for ambitious policies to support energy efficiency innovations for the residential sector, which ideally should be complemented by measures to limit the rebound effect.

C1 [Braungardt, Sibylle; Elsland, Rainer; Eichhammer, Wolfgang] Fraunhofer Inst Syst & Innovat Res ISI, Breslauer Str 48, D-76139 Karlsruhe, Germany.

RP Braungardt, S (reprint author), Fraunhofer Inst Syst & Innovat Res ISI, Breslauer Str 48, D-76139 Karlsruhe, Germany.

EM sibylle.braungardt@isi.fraunhofer.de

CR Allcott H, 2012, J ECON PERSPECT, V26, P3, DOI 10.1257/jep.26.1.3

Antal M, 2014, ENERG POLICY, V68, P585, DOI 10.1016/j.enpol.2013.11.016

Attali S, 2011, P EEDAL C

Barker T, 2009, ENERG EFFIC, V2, P411, DOI 10.1007/s12053-009-9053-y

BASS FM, 1969, MANAGE SCI, V15, P215, DOI 10.1287/mnsc.15.5.215

Bull J, 2012, ENERG POLICY, V50, P242, DOI 10.1016/j.enpol.2012.07.001

Consumer Focus, 2012, INFL CONS ATT BUYING

[Anonymous], 2014, SEEDS WORKING PAPER

EDLER J., 2013, REV POLICY MEASURES

Elsland R, 2013, ENOUGH ELECT BEING S

Elsland R, 2014, ENRGY PROCED, V62, P236, DOI 10.1016/j.egypro.2014.12.385

European Commission, 2013, EU EN TRANSP GHG EM

Foxon TJ, 2008, INNOVATION LOW CARBO

Fraunhofer ISI, 2014, STUDY EVALUATING CUR

Gillingham K, 2013, NATURE, V493, P475, DOI 10.1038/493475a

Greening LA, 2000, ENERG POLICY, V28, P389

International Energy Agency (IEA), 2014, EN EFF MARK REP

IEA, 2012, INT EN AG INS SER

JAFFE AB, 1994, RESOUR ENERGY ECON, V16, P91, DOI 10.1016/0928-7655(94)90001-9

Kaenzig J, 2010, J IND ECOL, V14, P121, DOI 10.1111/j.1530-9290.2009.00195.x

PSI & BIOIS, 2011, IMP INN REG COSTS EN

Revelt D, 1997, REV ECON STAT, V80, P1

Schiellerup P, 2011, INNOVATIONS LOW CARB, P56

Schleich J, 2014, ENERG POLICY, V72, P35, DOI 10.1016/j.enpol.2014.04.028

Sorrell S, 2008, ECOL ECON, V65, P636, DOI 10.1016/j.ecolecon.2007.08.013

Sorrell S, 2009, ENERG POLICY, V37, P1356, DOI 10.1016/j.enpol.2008.11.026

Wilson C, 2012, NAT CLIM CHANGE, V2, P780, DOI 10.1038/NCLIMATE1576

NR 27

TC 2

Z9 2

U1 2

U2 4

PU SPRINGER

PI NEW YORK

PA 233 SPRING ST, NEW YORK, NY 10013 USA  
 SN 1432-847X  
 EI 1867-383X  
 J9 ENVIRON ECON POLICY  
 JI Environ. Econ. Policy Stud.  
 PD APR  
 PY 2016  
 VL 18  
 IS 2  
 SI SI  
 BP 213  
 EP 228  
 DI 10.1007/s10018-015-0129-y  
 PG 16  
 WC Economics  
 SC Business & Economics  
 GA DO7PQ  
 UT WOS:000377974900006  
 DA 2018-05-03  
 ER

PT S

AU Cetin, KS  
 Kallus, C

AF Cetin, Kristen Sara  
 Kallus, Catilyn

BE Chong, O  
 Parrish, K  
 Tang, P  
 Grau, D  
 Chang, J

TI Data-Driven Methodology for Energy and Peak Load Reduction of  
 Residential HVAC Systems

SO ICSDEC 2016 - INTEGRATING DATA SCIENCE, CONSTRUCTION AND SUSTAINABILITY

SE Procedia Engineering

LA English

DT Proceedings Paper

CT International Conference on Sustainable Design, Engineering and  
 Construction (ICSDEC)

CY MAY 18-20, 2016

CL Arizona State Univ, Coll Avenue Commons, Tempe, AZ

SP Amer Soc Civil Engineers Architectural Engrn Inst

HO Arizona State Univ, Coll Avenue Commons

DE Residential Buildings; Smart Grid; Data Analytics; HVAC Systems

AB Residential buildings in the United States are responsible for the consumption of approximately 38% of electricity, and for much of the fluctuations in the power demands on the electric grid, particularly in hot climates. Residential Heating, Ventilation, and Air Conditioning (HVAC) systems are one of the largest electricity users of homes in these regions. "Smart" technologies, including electric grid-connected devices and home energy monitoring systems are increasingly available and installed in buildings, enabling new, data-driven methodologies for the operation of smarter, more sustainable building systems. This research investigates the use of residential energy use data and smart connected thermostat data to continuously monitor the health and performance of residential HVAC systems. Using field-collected HVAC energy consumption and performance data to develop a process-history based model, the results of this research suggest that the use of this methodology can save up to 6% of annual energy use of residential buildings. (C) 2016 The Authors. Published by Elsevier Ltd. This is an open access article under the CC BY-NC-ND license.

C1 [Cetin, Kristen Sara] Iowa State Univ, Dept Civil Construct & Environm Engrn, Ames, IA 50011 USA.

[Kallus, Catilyn] Univ Texas Austin, Dept Civil Architectural & Environm Engrn, Austin, TX 78712 USA.

RP Cetin, KS (reprint author), Iowa State Univ, Dept Civil Construct & Environm Engr, Ames, IA 50011 USA.  
 CR ABI Research, 2015, SMART HOM BIANN REV  
 American Society of Heating Refrigerating and Air-Conditioning Engineers, 2013, ASHRAE HDB FUND  
 Bell L., 2015, ACHP SOFTWARE  
 Cetin KS, 2015, ENER BUILDINGS, V96, P210, DOI 10.1016/j.enbuild.2015.03.039  
 Downey T., 2002, WHAT CAN 13000 AIR C  
 eGauge, 2015, EGAUGE 2 SER DAT SPE  
 Electricity Reliability Council of Texas (ERCOT), 2013, LONG TERM HOURL PEAK  
 Institute for Electrical Efficiency (IEE), 2012, UT SCAL SMART MET DE  
 Juniper Research, 2015, INT THINGS CONS IND  
 Lekov A, 2006, 2006 ACEEE SUMMER ST  
 Mowris R. J., 2004, ACEEE 2004 SUMMER ST  
 Proctor J., 2004, PUBL SESS ASHRAE WIN  
 Proctor J., 1997, ASHRAE T, V103, P406  
 Rhodes JD, 2014, ENERGY, V65, P462, DOI 10.1016/j.energy.2013.11.004  
 Rossi T. M., 2004, INT REFR AIR COND C  
 US. Department of Energy, 2011, BUILD EN DAT BOOK  
 US. Energy Information Administration, 2015, EN CONS EST SECT 194  
 US. Energy Information Administration, 2009, 2009 RECS RES EN CON

NR 18  
 TC 2  
 Z9 2  
 U1 1  
 U2 2  
 PU ELSEVIER SCIENCE BV  
 PI AMSTERDAM  
 PA SARA BURGERHARTSTRAAT 25, PO BOX 211, 1000 AE AMSTERDAM, NETHERLANDS  
 SN 1877-7058  
 J9 PROCEDIA ENGINEER  
 PY 2016  
 VL 145  
 BP 852  
 EP 859  
 DI 10.1016/j.proeng.2016.04.205  
 PG 8  
 WC Construction & Building Technology; Engineering, Civil  
 SC Construction & Building Technology; Engineering  
 GA BG2OQ  
 UT WOS:000387531600110  
 OA gold  
 DA 2018-05-03  
 ER

PT S  
 AU Ekstrom, T  
 Blomsterberg, A  
 AF Ekstrom, Tomas  
 Blomsterberg, Ake  
 BE Kurnitski, J  
 TI Renovation of Swedish single-family houses to passive house standard -  
 Analyses of energy savings potential  
 SO Sustainable Built Environment Tallinn and Helsinki Conference SBE16  
 Build Green and Renovate Deep  
 SE Energy Procedia  
 LA English  
 DT Proceedings Paper  
 CT SBE16 Tallinn and Helsinki Conference on Build Green and Renovate Deep  
 CY OCT 05-07, 2016

CL Tallinn, ESTONIA

SP Finnish Assoc Civil Engineers RIL, Estonian Assoc Civil Engineers EEL

DE deep renovation; energy retrofit; detailed energy simulations;  
single-family houses

AB A third of Sweden's two million single-family houses were built in the period 1961-1980, and many of them are in need of renovation. These houses have a high energy use and are in technical terms fairly homogenous. This investigation evaluates the theoretical energy savings potential of renovating houses from this period. Four reference houses were selected and simulated using common renovation measures. The results indicate that most of the existing single-family housing stock will likely not be able to attain the passive house standard after renovation and using today's technology. This is explained by the fact that some house characteristics impose a limiting factor on the energy renovation. Such examples are the shape, foundation and composition of the building envelope. Nevertheless, it is still possible to drastically reduce the final energy use by approximately 65-75 %. (C) 2016 The Authors. Published by Elsevier Ltd

C1 [Ekstrom, Tomas] NCC AB, Hyllie Blvd 10B, S-20547 Malmö, Sweden.

[Ekstrom, Tomas; Blomsterberg, Ake] Lund Univ, Div Energy & Bldg Design, Dept Architecture & Built Environm, S-22100 Lund, Sweden.

RP Ekstrom, T (reprint author), NCC AB, Hyllie Blvd 10B, S-20547 Malmö, Sweden.; Ekstrom, T (reprint author), Lund Univ, Div Energy & Bldg Design, Dept Architecture & Built Environm, S-22100 Lund, Sweden.

EM tomas.ekstrom@ncc.se

OI Ekstrom, Tomas/0000-0002-1802-1964

FU Development Fund of the Swedish Construction Industry (SBUF); Swedish Energy Agency; NCC AB

FX The project is funded by the Development Fund of the Swedish Construction Industry (SBUF), the Swedish Energy Agency and NCC AB.

CR BLOCON, 2016, HEAT 2

Boverket, 2010, TEKN STAT DEN SVENSK

Boverket, 2015, SWED BUILD REG

Boverket, 2010, EN BEB TEKN EG BER R

Boverket, 2009, SA MAR VAR HUS RED R

EQUA, 2016, DET DYN MULT SIM APP

Martin Erlandsson S.R., 2012, KRAVSPECIFIKATION FE

[Anonymous], 2008, 423AG1 SISTK

Industriteknik S, 1997, 3081997 SSEN

Isover, 2008, VILL KANND 70 TALSH

Cecilia Bjork L.N., 2009, SA BYGGDES VILLAN SV, V2

Kungliga Byggnadsstyrelsen, 1960, SWED BUILD REG

Levin P., 2012, SVEBY BRANSCHSTANDAR

Molin A., 2012, PLUSENERGIHUS FINNAN

Paroc, 2014, PAROC RENZERO EN REN

Planverk S., 1975, SWEDISH BUILDING REG

SGBC, 2014, MILJ 2 2 BED BEF BYG

Statens Planverk, 1967, SWED BUILD REG

Swedish Energy Agency, 2015, SUMM EN STAT DWELL N

Swedish Energy Agency, 2014, CIRC PUMPS WAT BAS H

Swedish Energy Agency, 2015, 201506 ES SWED EN AG

Swedish Standards Institute, 2008, 69462007 SSEN ISO

Swedish Standards Institute, 2008, 133702007 SSEN ISO

Sweden S., 2015, NUMB DWELL TYP BUILD

NR 24

TC 2

Z9 2

U1 0

U2 1

PU ELSEVIER SCIENCE BV

PI AMSTERDAM

PA SARA BURGERHARTSTRAAT 25, PO BOX 211, 1000 AE AMSTERDAM, NETHERLANDS

SN 1876-6102

J9 ENRGY PROCED

PY 2016

VL 96

BP 134

EP 145

DI 10.1016/j.egypro.2016.09.115

PG 12

WC Construction & Building Technology; GREEN & SUSTAINABLE SCIENCE & TECHNOLOGY; Energy & Fuels

SC Construction & Building Technology; Science & Technology - Other Topics; Energy & Fuels

GA BG8TQ

UT WOS:000392696500013

OA gold

DA 2018-05-03

ER

PT J

AU Kneifel, J

Healy, W

Filliben, J

Boyd, M

AF Kneifel, Joshua

Healy, William

Filliben, James

Boyd, Matthew

TI Energy performance sensitivity of a net-zero energy home to design and use specifications

SO JOURNAL OF BUILDING PERFORMANCE SIMULATION

LA English

DT Article

DE net-zero energy construction; energy efficiency; residential building; whole building energy simulation

ID OCCUPANTS BEHAVIOR; SIMULATION; DWELLINGS; MODELS

AB The purpose of this report is to test the sensitivity of the energy performance of the National Institute of Standards and Technology (NIST)'s Net Zero Energy Residential Test Facility (NZERTF) design to variation in the assumed specifications of occupant behaviour and building design characteristics using whole building energy simulations. The analysis includes a total of 128 EnergyPlus (E+) simulations (DOE 2013) considering two levels for each of the seven factors that could impact the energy performance of the NZERTF: building design, air leakage, occupant behaviour, weather, building orientation, and heating and cooling setpoint temperatures. The results for each combination of the seven factors are analysed to determine the magnitude and significance of changing these factors, and the interaction effects between the factors. There is particular focus on the building design results to determine if the energy performance of the NZERTF is more or less stable than that of typical residential construction in Maryland.

C1 [Kneifel, Joshua; Healy, William; Boyd, Matthew] NIST, Engn Lab, 100 Bur Dr, Gaithersburg, MD 20899 USA.

[Filliben, James] NIST, Informat Technol Lab, 100 Bur Dr, Gaithersburg, MD 20899 USA.

RP Kneifel, J (reprint author), NIST, Engn Lab, 100 Bur Dr, Gaithersburg, MD 20899 USA.

EM joshua.kneifel@nist.gov

CR Blight TS, 2013, ENERGBUILDINGS, V66, P183, DOI 10.1016/j.enbuild.2013.06.030

Box G. E., 1978, STAT EXPT INTRO DESI

Eisenhower B, 2012, J BUILD PERFORM SIMU, V5, P171, DOI 10.1080/19401493.2010.549964

Firth SK, 2010, BUILD RES INF, V38, P25, DOI 10.1080/09613210903236706

Gaceo S.C., 2009, BUILDING SIMULATION, P584

Gill ZM, 2010, BUILD RES INF, V38, P491, DOI 10.1080/09613218.2010.505371

Gunay HB, 2014, J BUILD PERFORM SIMU, V7, P457, DOI 10.1080/19401493.2013.866695

Haldi F, 2011, J BUILD PERFORM SIMU, V4, P323, DOI 10.1080/19401493.2011.558213

Heiselberg P, 2009, RENEW ENER, V34, P2030, DOI 10.1016/j.renene.2009.02.016

Hoes P, 2009, ENER BUILDINGS, V41, P295, DOI 10.1016/j.enbuild.2008.09.008  
Ryan EM, 2012, ENER BUILDINGS, V47, P375, DOI 10.1016/j.enbuild.2011.12.020  
Tanimoto J, 2004, ENER BUILDINGS, V36, P781, DOI 10.1016/j.enbuild.2004.01.019  
Tanimoto J, 2008, BUILD ENVIRON, V43, P610, DOI 10.1016/j.buildenv.2006.06.034  
Yildiz Y, 2012, APPL ENER, V93, P337, DOI 10.1016/j.apenergy.2011.12.048

NR 14

TC 2

Z9 2

U1 1

U2 6

PU TAYLOR & FRANCIS LTD

PI ABINGDON

PA 4 PARK SQUARE, MILTON PARK, ABINGDON OX14 4RN, OXON, ENGLAND

SN 1940-1493

EI 1940-1507

J9 J BUILD PERFORM SIMU

J1 J. Build. Perf. Simul.

PD JAN

PY 2016

VL 9

IS 1

BP 70

EP 83

DI 10.1080/19401493.2014.995708

PG 14

WC Construction & Building Technology

SC Construction & Building Technology

GA DB7KN

UT WOS:000368694100005

DA 2018-05-03

ER

PT J

AU Xing, R

Hanaoka, T

Kanamori, Y

Dai, HC

Masui, T

AF Xing, Rui

Hanaoka, Tatsuya

Kanamori, Yuko

Dai, Hancheng

Masui, Toshihiko

TI Energy Service Demand Projections and CO2 Reduction Potentials in Rural

Households in 31 Chinese Provinces

SO SUSTAINABILITY

LA English

DT Article

DE China; rural household; Shared Socioeconomic Pathways; CO2 emission;  
efficient technology

ID CARBON EMISSIONS; CONSUMPTION; URBAN; EXPENDITURE; ENVIRONMENT;  
EFFICIENCY; CITY

AB Until 2012, most of China's population lived in rural areas with markedly different patterns of household energy consumption from those in Chinese cities. The studies so far done on residential energy use in rural Chinese households have been limited to questionnaire surveys and panel data analyses. Hardly any studies on energy demand in rural areas have considered both the climatic and economic disparities across Chinese regions. In this study we conduct a systematic analysis of the rural Chinese residential sector on a regional basis. We begin by developing a macro-model to estimate energy service demands up to 2050.



Next, we apply the AIM(Asia-Pasific Integrated Model)/Enduse model, a bottom-up cost-minimization model with a detailed mitigation technology database, to estimate the mitigation potential of low-carbon technologies in rural China. Our results show that energy service demand in the rural household sector will continue to increase in regions with growing population or income conditions. However, after 2030, the rural residential energy service demand will start to decline in most Chinese regions. The impacts of efficient technologies will vary from one region to the next due to regional climatic and economic disparities. Throughout all of China, the penetration of efficient technologies can reduce CO2 emissions by 20% to 50%. Of the technologies available, efficient lighting, biomass water heaters, and efficient electronics bring the most benefit when implemented in rural households.

C1 [Xing, Rui; Hanaoka, Tatsuya; Kanamori, Yuko; Dai, Hancheng; Masui, Toshihiko] Natl Inst Environm Studies, Ctr Social & Environm Syst Res, Tsukuba, Ibaraki 3058506, Japan.

RP Xing, R (reprint author), Natl Inst Environm Studies, Ctr Social & Environm Syst Res, 16-2 Onogawa, Tsukuba, Ibaraki 3058506, Japan.

EM xing.rui@nies.go.jp; hanaoka@nies.go.jp; kanamori@nies.go.jp;  
dai.hancheng@nies.go.jp; masui@nies.go.jp

FU Environment Research and Technology Development Fund of Ministry of Environment, Japan [S-12-2]

FX This research was supported by the Environment Research and Technology Development Fund (S-12-2) of the Ministry of the Environment, Japan. The authors are grateful to Toshiharu. Ikaga and Shivika. Mittal for providing valuable research suggestions. The authors also thank anonymous referees who reviewed and gave important comments to this paper.

CR Akashi O, 2012, SUSTAIN SCI, V7, P139, DOI 10.1007/s11625-012-0166-4

ANDERSON JG, 1987, J CONSUM AFF, V21, P1, DOI 10.1111/j.1745-6606.1987.tb00185.x

Buchs M, 2013, ECOL ECON, V90, P114, DOI 10.1016/j.ecolecon.2013.03.007

Chitnis M, 2012, APPL ENERG, V94, P202, DOI 10.1016/j.apenergy.2012.01.005

Dai HC, 2012, ENERG POLICY, V50, P736, DOI 10.1016/j.enpol.2012.08.023

Eom J, 2012, ENERGY, V46, P405, DOI 10.1016/j.energy.2012.08.009

Evans M, 2014, ENERG POLICY, V64, P243, DOI 10.1016/j.enpol.2013.06.040

Fan JL, 2015, ENERG BUILDINGS, V96, P201, DOI 10.1016/j.enbuild.2015.03.026

GEI, 2010, SIT TRENDS CHIN RUR

[?? Han Yun], 2013, [??????, Chinese Agricultural Science Bulletin], V29, P182

Hanaoka T., 2015, AIM ENDUSE MODEL MAN

Henley A, 1997, OXFORD B ECON STAT, V59, P149, DOI 10.1111/1468-0084.00054

IIASA, 2012, SSP DAT VERS 0 93

International Energy Agency, 2014, IEA WORLD EN OUTL

Kainuma M, 2003, CLIMATE POLICY ASSES

Krey V, 2012, ENERG ECON, V34, pS272, DOI 10.1016/j.eneco.2012.04.013

Liu WL, 2013, ENERG POLICY, V55, P128, DOI 10.1016/j.enpol.2012.11.031

Luo G, 2008, CHIN AGR SCI B, V24, P535

MOHURD, 1993, THERM DES COD CIV BU

National Bureau of Statistical of China (NBSC), 2012, INT PROV DIV URB RUR

National Bureau of Statistical of China (NBSC), 2012, CHIN STAT YB 2010

National Bureau of Statistical of China (NBSC), 2015, PUBL DAT

Ning Y., 2012, SUSTAIN ENERGY, V2, P76

O'Neill B.C., 2015, GLOBL ENV CHANG

Rosas-Flores JA, 2011, ENERG BUILDINGS, V43, P10, DOI 10.1016/j.enbuild.2010.08.020

SHASE, 2000, SCHEDULE VER 2 0

The Economist, 2014, ECONOMIST

Tonooka Y, 2006, ENERG BUILDINGS, V38, P1335, DOI 10.1016/j.enbuild.2006.04.011

Van Vuuren D.P., 2012, GLOBL ENV CHANG, V22, P31

Wang X., 1996, ENERGY, V22, P1159

Wang XH, 2001, ENERG POLICY, V29, P1391

Wang XiaoHua, 2001, Transactions of the Chinese Society of Agricultural Engineering, V17, P88

Xing R., 2013, INT J SUSTAINABLE BU, V4, P229

Xing R., 2015, ENV RES LETT, V10

Yu S, 2014, ENERGY, V67, P284, DOI 10.1016/j.energy.2013.12.072

Yu XY, 2014, J ENVIRON PSYCHOL, V38, P39, DOI 10.1016/j.jenvp.2013.12.009

Zhang Q., 2001, J ARCHIT PLAN ENV EN, V548, P69

Zhao CS, 2012, ENRGY PROCED, V14, P805

[??? ZHOU Shudong], 2009, [????, Resources Science], V31, P696

NR 39

TC 2

Z9 2

U1 2

U2 19

PU MDPI AG

PI BASEL

PA POSTFACH, CH-4005 BASEL, SWITZERLAND

SN 2071-1050

J9 SUSTAINABILITY-BASEL

JI Sustainability

PD DEC

PY 2015

VL 7

IS 12

BP 15833

EP 15846

DI 10.3390/su71215789

PG 14

WC GREEN & SUSTAINABLE SCIENCE & TECHNOLOGY; Environmental Sciences;

Environmental Studies

SC Science & Technology - Other Topics; Environmental Sciences & Ecology

GA DA1JA

UT WOS:000367550900004

OA gold

DA 2018-05-03

ER

PT J

AU Ho, E

AF Ho, Ezra

TI Bound by ethical complexities and socio-material histories: an

exploration of household energy consumption in Singapore

SO ENERGY RESEARCH & SOCIAL SCIENCE

LA English

DT Article

DE Singapore households; Energy-use; Sustainable consumption policy;

Practice theory; Material geographies; Ethnography

ID PRO-ENVIRONMENTAL BEHAVIOR; CLIMATE-CHANGE; SUSTAINABILITY TRANSITIONS;

LIFE-STYLES; GREEN CONSUMPTION; POLICIES; CONSERVATION; MANAGEMENT;

CARBON; ETHNOGRAPHY

AB Households are increasingly subject to environmental regulation and intervention in today's carbonconstrained world. Highlighting cross-disciplinary synergies between practice theory and material geographies, I illuminate the lived complexities of everyday energy-use in Singapore. Based on an ethnographic study of 8 households, it is apparent that energy practices are sustained and reproduced through the subjectivities of materialities, practical ethics, socialised rules and histories, embedded within the spatio-temporalities of the actually-existing household. For energy conservation policy and research, these findings suggest non-engagement with the complexities of household energy-use. By promoting a single normative vision of 'Green' energy practices, energy conservation initiatives risk alienating people with practices that do not resonate with household dynamics as they are lived. Instead, an engagement of 'practices' instead of 'behavior' opens up a more expansive field for research and policy engagement in the dynamic and path dependent processes of social normality, and more effective means of encouraging more sustainable ways of living. (C) 2015 Elsevier Ltd. All rights reserved.

C1 [Ho, Ezra] Natl Univ Singapore, Dept Geog, 1 Arts Link, Singapore 117570, Singapore.

- RP Ho, E (reprint author), Natl Univ Singapore, Dept Geog, 1 Arts Link, Singapore 117570, Singapore.  
EM ezra\_ho@live.com
- CR AJZEN I, 1991, ORGAN BEHAV HUM DEC, V50, P179, DOI 10.1016/0749-5978(91)90020-T
- Alfredsson EC, 2004, ENERGY, V29, P513, DOI 10.1016/j.energy.2003.10.013
- Bakker K, 2006, PROG HUM GEOG, V30, P5, DOI 10.1191/0309132506ph588oa
- Barr S, 2006, GEOGRAPHY, V91, P43
- Bartiaux F, 2008, J CLEAN PROD, V16, P1170, DOI 10.1016/j.jclepro.2007.08.013
- Beck Ulrich, 1992, RISK SOC NEW MODERNI
- Begg D., 2003, ECONOMICS
- Boulanger PM, 2007, ROUT RES ENVIRON POL, V13, P17
- Bradshaw CJA, 2010, PLOS ONE, V5, DOI 10.1371/journal.pone.0010440
- Brown M. E., 2014, CONCEPT SOCIAL UNITI
- Burgess J, 2003, NEGOTIATING ENVIRONMENTAL CHANGE, P261
- Butler C., 2014, J CONSUM CULT
- Caldwell R., 2012, J THEOR SOC BEHAV, V42, P283
- Castree N., 2003, HDB CULTURAL GEOGRAP, P168
- Castree N, 2014, NAT CLIM CHANGE, V4, P763, DOI 10.1038/NCLIMATE2339
- Chang S., 2000, BERKELEY PLAN J, V14, P97
- Conlisk J, 1996, J ECON LIT, V34, P669
- Crang M., 2007, DOING ETHNOGRAPHIES
- Crawford M., 2015, WORLD YOUR HEAD BECO
- Csutora M, 2012, J CONSUM POLICY, V35, P145, DOI DOI 10.1007/S10603-012-9187-8
- Darier E., 1998, DISCOURSES ENV, P1
- Aull Davies C., 2008, REFLEXIVE ETHNOGRAPH
- De Leon J. P., 2005, FIELD METHOD, V17, P200
- Dowling R., 2011, MAT GEOGRAPHIES HOUS, P75
- DUNLAP RE, 1978, J ENVIRON EDUC, V9, P10, DOI 10.1080/00958964.1978.10801875
- Dunlap RE, 2000, J SOC ISSUES, V56, P425, DOI 10.1111/0022-4537.00176
- Ehrlich PR, 2013, P ROY SOC B-BIOL SCI, V280, DOI 10.1098/rspb.2012.2845
- Eng TS, 1996, HABITAT INT, V20, P279, DOI 10.1016/0197-3975(95)00063-1
- Epstein B, 2009, SYNTHESIS, V166, P187, DOI 10.1007/s11229-007-9272-8
- Fine B., 1998, VIRTUALISM NEW POLIT, V998, P49
- Forsey MG, 2010, ETHNOGRAPHY, V11, P558, DOI 10.1177/1466138110372587
- Foucault M., 2000, SUBJECT POWER POWER, VIII, P320
- Gatersleben B, 2002, ENVIRON BEHAV, V34, P335, DOI 10.1177/0013916502034003004
- Geels FW, 2002, RES POLICY, V31, P1257, DOI 10.1016/S0048-7333(02)00062-8
- Giddens Anthony, 1984, CONSTITUTION SOC
- Gilg A, 2005, FUTURES, V37, P481, DOI 10.1016/j.futures.2004.10.016
- Government of Singapore, 2014, LAT DAR HOUS HOUS
- Gram-Hanssen K, 2014, ARCHIT ENG DES MANAG, V10, P91, DOI 10.1080/17452007.2013.837251
- Gram-Hanssen K, 2011, J CONSUM CULT, V11, P61, DOI 10.1177/1469540510391725
- Gram-Hanssen K, 2010, BUILD RES INF, V38, P175, DOI 10.1080/09613210903541527
- Gram-Hanssen K, 2010, J IND ECOL, V14, P150, DOI 10.1111/j.1530-9290.2009.00194.x
- GROB A, 1995, J ENVIRON PSYCHOL, V15, P209, DOI 10.1016/0272-4944(95)90004-7
- Guan L, 2011, ENER BUILDINGS, V43, P485, DOI 10.1016/j.enbuild.2010.10.013
- Haas R, 2008, ENER POLICY, V36, P4012, DOI 10.1016/j.enpol.2008.06.028
- Hammersley M, 2006, ETHNOGR EDUC, V1, P3, DOI 10.1080/17457820500512697
- Hand M., 2007, J CONSUM CULT, V7, P79, DOI DOI 10.1177/1469540507073509
- Hand M., 2005, SOCIAL RES ONLINE, V10
- Hargreaves T., 2008, THESIS
- Hargreaves T, 2013, ENVIRON PLANN A, V45, P402, DOI 10.1068/a45124
- Hargreaves T, 2011, J CONSUM CULT, V11, P79, DOI 10.1177/1469540510390500
- He HZ, 2013, ENER POLICY, V55, P105, DOI 10.1016/j.enpol.2012.10.067
- Higginson S, 2014, LOCAL ENVIRON, V19, P520, DOI 10.1080/13549839.2013.802459
- Hitahings R, 2008, J MAT CULT, V13, P251
- Hitchings R, 2015, LOCAL ENVIRON, V20, P369, DOI 10.1080/13549839.2013.852524
- Hobson K, 2002, ENVIRON POLIT, V11, P95, DOI 10.1080/714000601
- Hobson K., 2003, INT J JUSTICE SUSTAI, V8, P95

- Hoekstra AY, 2014, SCIENCE, V344, P1114, DOI 10.1126/science.1248365
- Howell RA, 2013, GLOBAL ENVIRON CHANG, V23, P281, DOI 10.1016/j.gloenvcha.2012.10.015
- Howitt R, 2006, GEOGR ANN B, V88B, P323, DOI 10.1111/j.1468-0459.2006.00225.x
- Jaccard M, 2003, ENERGY J, V24, P49
- Jackson T., 2005, MOTIVATING SUSTAINAB
- Erben M. Jaeger, 2014, GAIA ECOL PERSP SCI, V23, P166
- Jensen JO, 2008, ECOL ECON, V68, P353, DOI 10.1016/j.ecolecon.2008.03.016
- Jones J. S., 2010, ETHNOGRAPHY SOCIAL S
- Kan MY, 2008, SOCIOL METHODOL, V38, P101, DOI 10.1111/j.1467-9531.2008.00197.x
- Kennedy EH, 2015, LOCAL ENVIRON, V20, P220, DOI 10.1080/13549839.2013.837039
- Kolmuss A., 2002, ENVIRON EDUC RES, V8, P239, DOI DOI 10.1080/13504620220145401
- Kua HW, 2012, ENER POLICY, V47, P49, DOI 10.1016/j.enpol.2012.04.009
- Lane R., 2011, MAT GEOGRAPHIES HOUS, P1
- Lawhon M, 2012, PROG HUM GEOG, V36, P354, DOI 10.1177/0309132511427960
- Moriarty R, 2013, EARTH SYST SCI DATA, V5, P241, DOI [10.5194/essd-5-241-2013, 10.5194/essd-6-235-2014]
- Lenzen M, 2013, ECON SYST RES, V25, P20, DOI 10.1080/09535314.2013.769938
- Lenzen M, 2012, ENVIRON SCI TECHNOL, V46, P8374, DOI 10.1021/es300171x
- LOEWENSTEIN G, 1992, Q J ECON, V107, P573, DOI 10.2307/2118482
- Lovbrand E, 2011, CRIT POLICY STUD, V5, P187, DOI 10.1080/19460171.2011.576531
- Loveday DL, 2008, ENER POLICY, V36, P4639, DOI 10.1016/j.enpol.2008.09.067
- Low D., 2011, BEHAV EC POLICY DESI
- Lutzenhiser L, 1999, ENER POLICY, V27, P217, DOI 10.1016/S0301-4215(99)00012-9
- Macnaghten P, 2003, SOCIOL REV, V51, P63, DOI 10.1111/1467-954X.00408
- Maniates M., 2015, J ENV STUDIES SCI, V5, P213
- Mansvelt J, 2008, PROG HUM GEOG, V32, P105, DOI 10.1177/0309132507080623
- Marechal K, 2010, ECOL ECON, V69, P1104, DOI 10.1016/j.ecolecon.2009.12.004
- Markard J, 2012, RES POLICY, V41, P955, DOI 10.1016/j.respol.2012.02.013
- McMeekin A, 2012, TECHNOL ANAL STRATEG, V24, P345, DOI 10.1080/09537325.2012.663960
- MEWR and MND, 2014, OUR HOM OUR ENV FUT
- MILLER A, 1985, ENVIRON MANAGE, V9, P179, DOI 10.1007/BF01867074
- Miller CA, 2015, ENERGY RES SOC SCI, V6, P29, DOI 10.1016/j.erss.2014.11.004
- Miller D., 1998, THEORY SHOPPING
- Moser G, 2008, J ENVIRON PSYCHOL, V28, P10, DOI 10.1016/j.jenvp.2007.09.001
- Moezzi M, 2014, ENERGY RES SOC SCI, V1, P30, DOI 10.1016/j.erss.2014.03.014
- Moldan B, 2012, ECOL INDIC, V17, P4, DOI 10.1016/j.ecolind.2011.04.033
- Moloney S., 2014, ENV POLICY GOVER, V24, P94
- Nye M, 2010, J IND ECOL, V14, P137, DOI 10.1111/j.1530-9290.2009.00193.x
- O'Malley P., 1997, EC SOC, V26, P217
- Paddock J., 2015, J CONSUM CULT
- Simonyi L. Pellandini, 2014, CONSUMPTION NOMIS EV
- Pink S, 2012, SITUATING EVERYDAY L
- Pink S., 2011, ETHNOGRAPHY INVISIBL, V41, P117
- Postill J., 2010, THEORISING MEDIA PRA, V4
- Raj P. A. D.V., 2009, J ENG SCI TECHNOL RE, V2, P71
- Randles S, 2006, INDUSTRIAL ECOLOGY AND SPACES OF INNOVATION, P220
- Rauschmayer F., 2015, ECOL ECON, V109, P211
- Reckwitz A., 2002, EUR J SOC THEORY, V5, P243, DOI [10.1177/13684310222225432, DOI 10.1177/13684310222225432]
- Robinson J.P., 2002, TIME USE RESOCIAL, P47
- Ross JP, 2002, ENERGY, V27, P861, DOI 10.1016/S0360-5442(02)00023-3
- Rutherford S, 2007, PROG HUM GEOG, V31, P291, DOI 10.1177/0309132507077080
- Sahakian M, 2014, J CONSUM CULT, V14, P25, DOI 10.1177/1469540513505607
- Sahakian MD, 2011, ENER POLICY, V39, P596, DOI 10.1016/j.enpol.2010.10.032
- Sanne C, 2002, ECOL ECON, V42, P273, DOI 10.1016/S0921-8009(02)00086-1
- SCARFE NV, 1962, J GEOGR, V61, P84, DOI 10.1080/00221346208982175
- Scerri A., 2011, MAT GEOGRAPHIES HOUS, P175
- Schatzki T.R., 1990, MIDWEST STUD PHILOS, V15, P280

- Schatzki T., 1996, SOCIAL PRACTICES WIT  
 Schatzki Theodore R., 2002, SITE SOCIAL PHILOS A  
 Schwartz S. H., 1977, ADV EXPT SOCIAL PSYC, V10, P221, DOI [DOI 10.1016/S0065-2601(08)60358-5, 10.1016/S0065-2601(08)60358-5]  
 Shirani F, 2013, LOCAL ENVIRON, V18, P455, DOI 10.1080/13549839.2013.779236  
 Shove E., 2003, SOCIAL ORG NORMALITY  
 Shove E., 2012, DYNAMICS SOCIAL PRAC  
 Shove L., 2006, EDGE EXPT CULTURAL A, V35  
 Shove E., 2015, EUR J SOC THEORY  
 Shove E, 2007, ENVIRON PLANN A, V39, P763, DOI 10.1068/a39310  
 Shove E, 2010, ENVIRON PLANN A, V42, P1273, DOI 10.1068/a42282  
 Shove E, 2010, THEOR CULT SOC, V27, P277, DOI 10.1177/0263276410361498  
 Shove E, 2010, RES POLICY, V39, P471, DOI 10.1016/j.respol.2010.01.019  
 Silverstone R., 1991, CULTURAL STUDIES, V5, P204, DOI DOI 10.1080/09502389100490171  
 Sim IX, 2002, TOWN PLANN REV, V73, P63  
 Sorrell S., 2007, UK ENERGY RES  
 Sorrell S, 2009, ENERG POLICY, V37, P1456, DOI 10.1016/j.enpol.2008.12.003  
 Southerton D, 2013, TIME SOC, V22, P335, DOI 10.1177/0961463X12464228  
 Sovacool BK, 2014, NATURE, V511, P529, DOI 10.1038/511529a  
 Sovacool BK, 2011, ENERG POLICY, V39, P1659, DOI 10.1016/j.enpol.2010.12.041  
 Sovacool B. K., 2014, ENERGY RES SOC SCI, V1, P1  
 Spreng D, 2014, ENERGY RES SOC SCI, V1, P65, DOI 10.1016/j.erss.2014.02.005  
 Spurling N., 2013, INTERVENTIONS PRACTI  
 Steg L, 2009, J ENVIRON PSYCHOL, V29, P309, DOI 10.1016/j.jenvp.2008.10.004  
 Steg L, 2008, ENERG POLICY, V36, P4449, DOI 10.1016/j.enpol.2008.09.027  
 Stem P. C., 1999, HUM ECOL REV, V6, P81  
 Stern PC, 2000, J SOC ISSUES, V56, P407, DOI 10.1111/0022-4537.00175  
 Stocker TF, 2013, CLIMATE CHANGE 2013  
 Teo S. E., 1992, TOWN PLANN REV, V63, P163  
 Toomela A, 2008, INTEGR PSYCHOL BEHAV, V42, P245, DOI 10.1007/s12124-008-9059-6  
 TRAIN K, 1985, ENERGY, V10, P1243, DOI 10.1016/0360-5442(85)90135-5  
 Tukker A, 2010, J IND ECOL, V14, P13, DOI 10.1111/j.1530-9290.2009.00208.x  
 Unruh GC, 2000, ENERG POLICY, V28, P817, DOI 10.1016/S0301-4215(00)00070-7  
 van Grunsven L., 1991, J HOUS BUILT ENVIRON, V6, P229  
 Vergragt P, 2014, J CLEAN PROD, V63, P1, DOI 10.1016/j.jclepro.2013.09.028  
 Waitt G, 2012, AUST GEOGR, V43, P51, DOI 10.1080/00049182.2012.649519  
 Wapner P., 2005, ETHICS INT AFF, V19, P77  
 Warde A, 2005, J CONSUM CULT, V5, P131, DOI DOI 10.1177/1469540505053090  
 Weida L, 2009, ENVIRON JUSTICE, V2, P79, DOI 10.1089/env.2009.0017  
 WELLS WD, 1966, J MARKETING RES, V3, P355, DOI 10.2307/3149851  
 Wilhite H, 1996, ENERG POLICY, V24, P795, DOI 10.1016/0301-4215(96)00061-4  
 WILHITE H, 1999, NA ADV CONSUMER RES, V26, P281  
 WILHITE H, 2008, J ENERGY EFFIC, V1, P121, DOI DOI 10.1007/S12053-008-9006-X  
 Wilhite H., 2000, BEHAV CLIMATE CHANGE, P109  
 WILKES RE, 1995, J CONSUM RES, V22, P27, DOI 10.1086/209433  
 Wilson C, 2007, ANNU REV ENV RESOUR, V32, P169, DOI 10.1146/annurev.energy.32.053006.141137  
 Wong CML, 2012, NAT CULT, V7, P95, DOI 10.3167/nc.2012.070106  
 Wood W, 2009, J CONSUM PSYCHOL, V19, P579, DOI 10.1016/j.jcps.2009.08.003  
 WWF, 2014, LIVING PLANET REPORT

NR 161

TC 2

Z9 2

U1 0

U2 0

PU ELSEVIER SCIENCE BV

PI AMSTERDAM

PA PO BOX 211, 1000 AE AMSTERDAM, NETHERLANDS

SN 2214-6296

EI 2214-6326  
 J9 ENERGY RES SOC SCI  
 JI Energy Res. Soc. Sci.  
 PD NOV  
 PY 2015  
 VL 10  
 BP 150  
 EP 164  
 DI 10.1016/j.erss.2015.07.016  
 PG 15  
 WC Environmental Studies  
 SC Environmental Sciences & Ecology  
 GA V3Y7J  
 UT WOS:000218708600016  
 DA 2018-05-03  
 ER

PT J  
 AU Long, TB  
 Young, W  
 Webber, P  
 Gouldson, A  
 Harwatt, H  
 AF Long, Thomas B.  
 Young, William  
 Webber, Phil  
 Gouldson, Andy  
 Harwatt, Helen

TI The impact of domestic energy efficiency retrofit schemes on householder attitudes and behaviours

SO JOURNAL OF ENVIRONMENTAL PLANNING AND MANAGEMENT

LA English

DT Article

DE retrofit; domestic; energy; efficiency; household; attitudes; behaviours

ID SUSTAINABLE CONSUMPTION; UK HOUSEHOLDS; COLD HOMES; CONSERVATION; POLICY; STRATEGIES; SPILLOVER; BARRIERS; SAVINGS; AGENDA

AB Retrofitting existing housing stock to improve energy efficiency is often required to meet climate mitigation, public health and fuel poverty targets. Increasing uptake and effectiveness of retrofit schemes requires understanding of their impacts on householder attitudes and behaviours. This paper reports results of a survey of 500 Kirklees householders in the UK, where the Kirklees Warm Zone scheme took place. This was a local government led city scale domestic retrofit programme that installed energy efficiency measures at no charge in over 50,000 houses. The results highlight key design features of the scheme, socio-economic and attitudinal factors that affected take-up of energy efficiency measures and impacts on behaviour and energy use after adoption. The results emphasise the role that positive feedback plays in reinforcing pro-environmental attitudes and behaviours of participants and in addressing concerns of non-participants. Our findings have implications for the design and operation of future domestic energy efficiency retrofit schemes.

C1 [Long, Thomas B.; Young, William; Webber, Phil; Gouldson, Andy] Univ Leeds, Sch Earth & Environm, Sustainabil Res Inst, Leeds, W Yorkshire, England.

[Harwatt, Helen] Loma Linda Univ, Sch Publ Hlth, Loma Linda, CA 92350 USA.

[Long, Thomas B.] Wageningnen Univ, Management Studies, Wageningnen, Netherlands.

RP Long, TB (reprint author), Univ Leeds, Sch Earth & Environm, Sustainabil Res Inst, Leeds, W Yorkshire, England.

EM thomas.long@wur.nl

OI Gouldson, Andy/0000-0002-1464-6465; Young, William/0000-0003-2586-9450;

Long, Thomas Benjamin/0000-0002-0655-3779

FU Ashden Trust

FX The authors are grateful for the financial support from the Ashden Trust

that enabled the research upon which this paper is based to take place.

- CR Abrahamse W, 2005, J ENVIRON PSYCHOL, V25, P273, DOI 10.1016/j.jenvp.2005.08.002
- Abrahamse W, 2009, J ECON PSYCHOL, V30, P711, DOI 10.1016/j.joep.2009.05.006
- Ajzen, 1991, ORGAN BEHAV HUM DEC, V50, P179, DOI DOI 10.1016/0749-5978(91)90020-T
- Bridgepoint, 2007, BRIDG ACQ LEEDS BRAD
- Carrington D., 2013, GUARDIAN
- Committee on Climate Change (CCC), 2010, 4 CARB BUDG RED EM 2
- CCC, 2011, M CARB BUDG 3 PROGR
- Committee on Climate Change (CCC), 2012, M CARB BUDG 2012 PRO
- Chatterton T, 2011, INTRO THINKING ENERG
- Chitnis M, 2013, ENERG POLICY, V55, P234, DOI 10.1016/j.enpol.2012.12.008
- Clinch JP, 2000, ENERG POLICY, V28, P1, DOI 10.1016/S0301-4215(99)00080-4
- Creswell JW, 2003, RES DESIGN QUALITATI
- Crompton T, 2010, COMMON CAUSE CASE WO
- Croucher M, 2011, ENERG POLICY, V39, P5795, DOI 10.1016/j.enpol.2011.07.011
- Darnton A., 2011, HABITS ROUTINES SUST
- Day R, 2011, HEALTH PLACE, V17, P885, DOI 10.1016/j.healthplace.2011.04.011
- Department of Communities and Local Government (DCLG), 2013, ENGL HOUS SURV HOMES
- Department for Energy and Climate Change (DECC) and Energy Saving Trust, 2011, HOM EN PAY YOU SAV P
- Department of Energy and Climate Change (DECC), 2011, ANN REP FUEL POV STA
- DECC (Department of Energy and Climate Change), 2013, STAT REL EXP STAT DO
- Dolan P., 2012, MINDSPACE INFLUENCIN
- Edrich B., 2011, KIRKLESS WARM ZONE F
- European Commission, 2012, FUT BRIEF GREEN BEH
- [Marmot Review Team FoE (Friends of the Earth)], 2011, HLTH IMP COLD HOM FU
- Geels FW, 2005, TECHNOLOGICAL TRANSITIONS AND SYSTEM INNOVATIONS: A CO-EVOLUTIONARY AND SOCIO-TECHNICAL ANALYSIS, P1
- Goodacre C, 2002, ENERG BUILDINGS, V34, P53, DOI 10.1016/S0378-7788(01)00077-9
- Grimes A, 2012, COST BENEFIT ANAL WA
- Harrington BE, 2005, HEALTH SOC CARE COMM, V13, P259, DOI 10.1111/j.1365-2524.2005.00558.x
- Harris J, 2010, HLTH MENTAL HLTH HOU
- Hori S, 2013, ENERG POLICY, V52, P354, DOI 10.1016/j.enpol.2012.09.043
- White E., 2014, SNSC05763
- Jackson T., 2005, MOTIVATING SUSTAINAB
- Johnson B., 2010, ED RES QUANTITATIVE
- Kellett J, 2007, J ENVIRON PLANN MAN, V50, P381, DOI 10.1080/09640560701261679
- Kirklees Council, 2011, KIRKL WARM ZON SCHEM
- Liddell C, 2010, ENERG POLICY, V38, P2987, DOI 10.1016/j.enpol.2010.01.037
- Linden AL, 2006, ENERG POLICY, V34, P1918, DOI 10.1016/j.enpol.2005.01.015
- Lorenzoni I, 2007, GLOBAL ENVIRON CHANG, V17, P445, DOI 10.1016/j.gloenvcha.2007.01.004
- Marsden PV, 2010, HANDBOOK OF SURVEY RESEARCH, 2ND EDITION, P1
- Michaelis L, 2003, J CLEAN PROD, V11, P915, DOI 10.1016/S0959-6526(02)00160-9
- Milne G, 2000, ENERG POLICY, V28, P411, DOI 10.1016/S0301-4215(00)00019-7
- Mudarri D, 2007, INDOOR AIR, V17, P226, DOI 10.1111/j.1600-0668.2007.00474.x
- ONS (Office for National Statistics), 2014, ENGL HOUS SURV 2012
- ONS (Office for National Statistics), 2013, LOC PROF DEM THEM OC
- Ormandy D, 2012, ENERG POLICY, V49, P116, DOI 10.1016/j.enpol.2011.09.003
- Owen AL, 2006, ECOL ECON, V58, P814, DOI 10.1016/j.ecolecon.2005.09.007
- Paco A.d., 2010, J ENVIRON PLANN MAN, V53, P963, DOI DOI 10.1080/09640568.2010.495489.
- Cooper I, 2012, UK HOUSING ENERGY FA
- Pitt Damian, 2012, J ENVIRON PLANN MAN, V56, P588, DOI DOI 10.1080/09640568.2012.692894
- Poortinga W, 2003, J ECON PSYCHOL, V24, P49, DOI 10.1016/S0167-4870(02)00154-X
- Rudge J, 2005, J PUBLIC HEALTH, V27, P353, DOI 10.1093/pubmed/fdi051
- Sanders M., 2012, BEH INS TEAM CAB OFF
- Schafer M., 2012, J CONSUM POLICY, V35, P65, DOI DOI 10.1007/S10603-011-9181-6
- Sheskin DJ, 2003, HDB PARAMETRIC NONPA
- Shove E, 2003, COMFORT CLEANLINESS

Steg L, 2009, J ENVIRON PSYCHOL, V29, P309, DOI 10.1016/j.jenvp.2008.10.004  
 Steg L, 2008, ENER POLICY, V36, P4449, DOI 10.1016/j.enpol.2008.09.027  
 Sweatman P, 2010, FINANCING ENERGY EFF  
 Thøgersen J, 2003, J ENVIRON PSYCHOL, V23, P225, DOI 10.1016/S0272-4944(03)00018-5  
 Thøgersen J, 1999, J ECON PSYCHOL, V20, P53, DOI 10.1016/S0167-4870(98)00043-9  
 Tovar MA, 2012, ENER POLICY, V50, P723, DOI 10.1016/j.enpol.2012.08.019  
 Tuominen P, 2012, ENER BUILDINGS, V51, P48, DOI 10.1016/j.enbuild.2012.04.015  
 Vaughan A, 2014, GUARDIAN  
 Webber P., 2013, IMPACTS HOU IN PRESS  
 Young W, 2012, ENER POLICY, V41, P742, DOI 10.1016/j.enpol.2011.11.040

NR 65

TC 2

Z9 2

U1 2

U2 32

PU ROUTLEDGE JOURNALS, TAYLOR & FRANCIS LTD

PI ABINGDON

PA 4 PARK SQUARE, MILTON PARK, ABINGDON OX14 4RN, OXFORDSHIRE, ENGLAND

SN 0964-0568

EI 1360-0559

J9 J ENVIRON PLANN MAN

J1 J. Environ. Plan. Manag.

PD OCT 3

PY 2015

VL 58

IS 10

BP 1853

EP 1876

DI 10.1080/09640568.2014.965299

PG 24

WC Environmental Studies

SC Environmental Sciences & Ecology

GA CP3KB

UT WOS:000359776700009

OA gold

DA 2018-05-03

ER

PT J

AU Havas, L

Ballweg, J

Penna, C

Race, D

AF Havas, Lisa

Ballweg, Julie

Penna, Chris

Race, Digby

TI Energising households: a financial analysis of incentivised energy  
 efficiency measures in remote Australia

SO ENERGY EFFICIENCY

LA English

DT Article

DE Energy efficiency; Households; Australia; Incentive; Internal rate of  
 return

ID RESIDENTIAL SECTOR; BEHAVIOR; INVESTMENTS; CONSUMPTION; PROGRAMS;  
 POLICIES; UK

AB Governments in developed economies are making considerable investments in energy efficiency  
 technologies and encouraging residential households to conserve energy. A major programme in Australia



has invested A\$280 million to encourage residential households to become more energy aware and make additional investment in energy efficiency measures. This paper examines the adoption of energy efficiency measures by residential households participating in this programme in a geographically remote Australian town. It uses data collected by the programme developers. It examines the financial return of the investment in terms of payback period and internal rate of return. It then discusses the financial return with respect to adoption of a range of products offered by the programme. Results show that adoption of energy efficiency measures by households was not solely guided by rational economic-maximising principles. For example, some frequently adopted measures had negative financial effectiveness. A range of important determining factors are discussed, and the consequent impact this has for analysis of the effectiveness of incentive programmes. Finally, this paper proposes considerations for future programmes to more effectively measure and target efficient adoption of energy efficient measures, both in remote and non-remote residential settings.

C1 [Havas, Lisa; Ballweg, Julie] Charles Darwin Univ, Ctr Renewable Energy, Darwin, NT 0810, Australia.  
[Penna, Chris] Alice Solar City, Alice Springs, NT 0870, Australia.

[Havas, Lisa; Race, Digby] Cooperat Res Ctr Remote Econ Participat, Alice Springs, NT 0870, Australia.  
[Race, Digby] CSIRO Ecosyst Sci, Alice Springs, NT 0870, Australia.

RP Havas, L (reprint author), Charles Darwin Univ, Ctr Renewable Energy, Darwin, NT 0810, Australia.  
EM lisa.havas@cdu.edu.au

FU Alice Springs Town Council

FX The research was conducted using a methodology approved by the Charles Darwin University's Human Research Ethics Committee (approved application H13039). The authors would like to acknowledge the Alice Springs Town Council for their support of this project and are also grateful to the referees whose careful reviews led to improvements in this paper.

CR ABS, 2011, AL SPRINGS T LOC GOV

Alice Solar City, 2014, AL SOL CIT 2008 2013

Brandon G, 1999, J ENVIRON PSYCHOL, V19, P75, DOI 10.1006/jevp.1998.0105

Brennan T, 2013, ENERGY J, V34

Bruderer Enzler H, 2014, ENER POLICY, V65, P524, DOI 10.1016/j.enpol.2013.10.049

Clinch JP, 2001, ENER POLICY, V29, P113, DOI 10.1016/S0301-4215(00)00110-5

DeCanio SJ, 1998, ENER POLICY, V26, P441, DOI 10.1016/S0301-4215(97)00152-3

Devabhaktuni V, 2013, RENEW SUST ENER REV, V19, P555, DOI 10.1016/j.rser.2012.11.024

du Can SD, 2014, ENER POLICY, V72, P56, DOI 10.1016/j.enpol.2014.04.035

DUBIN JA, 1984, ECONOMETRICA, V52, P345, DOI 10.2307/1911493

Gamtesa SF, 2013, ENER BUILDINGS, V57, P155, DOI 10.1016/j.enbuild.2012.11.006

Gatersleben B, 2002, ENVIRON BEHAV, V34, P335, DOI 10.1177/0013916502034003004

Gillingham K, 2006, ANNU REV ENV RESOUR, V31, P161, DOI 10.1146/annurev.energy.31.020105.100157

Howarth RB, 2000, ENER POLICY, V28, P477

IEA, 2013, CO2 EM FUEL COMB, DOI [10.5257/iea/co2/2013, DOI 10.5257/IEA/CO2/2013]

Jaffe A. B., 2004, ENCY ENERGY, V2, P79, DOI [10.1016/B0-12-176480-X/00228-X, DOI 10.1016/B0-12-176480-X/00228-X]

Jakob M, 2006, ENER POLICY, V34, P172, DOI 10.1016/j.enpol.2004.08.039

Lefley F, 1996, INT J PROD ECON, V44, P207, DOI 10.1016/0925-5273(96)00022-9

LEVINE MD, 1995, ANNU REV ENER ENV, V20, P535

Mallaburn PS, 2014, ENER EFFIC, V7, P23, DOI 10.1007/s12053-013-9197-7

McKenzie M, 2013, PREPAYMENT METERS EN

Mishan EJ, 1972, ELEMENTS COST BENEFI

Mott G., 1990, INVESTMENT APPRAISAL

Mundaca L, 2010, ANNU REV ENV RESOUR, V35, P305, DOI 10.1146/annurev-environ-052810-164840

Wyld Group, 2011, MIDT REV SOL CIT PRO

Osborne M., 2010, Q REV EC FINANCE, V50, P234, DOI DOI 10.1016/J.QREF.2010.01.002

Prime Minister's Task Group on Energy Efficiency (PMTGEE), 2010, TASK GROUPS FULL REP

Rosenow J, 2013, ENER POLICY, V62, P1194, DOI 10.1016/j.enpol.2013.07.103

Sanstad A. H, 1994, P ACEEE SUMM STUD EN, P175

Santamouris M., 2001, P PRES SAVE PROJ EN

Scott S, 1997, ENER ECON, V19, P187, DOI 10.1016/S0140-9883(96)01000-6

Steg L, 2008, ENER POLICY, V36, P4449, DOI 10.1016/j.enpol.2008.09.027

Stephenson J, 2010, ENER POLICY, V38, P6120, DOI 10.1016/j.enpol.2010.05.069

Wada K, 2012, ENERGY, V48, P5, DOI 10.1016/j.energy.2012.01.046

Zahedi A, 2010, RENEW SUST ENER REV, V14, P2208, DOI 10.1016/j.rser.2010.03.026

NR 35

TC 2

Z9 3

U1 1

U2 5

PU SPRINGER

PI DORDRECHT

PA VAN GODEWIJCKSTRAAT 30, 3311 GZ DORDRECHT, NETHERLANDS

SN 1570-646X

EI 1570-6478

J9 ENER EFFIC

JI Energy Effic.

PD OCT

PY 2015

VL 8

IS 5

BP 951

EP 962

DI 10.1007/s12053-015-9326-6

PG 12

WC GREEN & SUSTAINABLE SCIENCE & TECHNOLOGY; Energy & Fuels; Environmental Studies

SC Science & Technology - Other Topics; Energy & Fuels; Environmental Sciences & Ecology

GA CS0FX

UT WOS:000361734800008

DA 2018-05-03

ER

PT S

AU Barnes, E

Parrish, K

AF Barnes, Elizabeth

Parrish, Kristen

BE Chong, WO

Chang, J

Parrish, K

Berardi, U

TI Small buildings, big impacts: developing a library of small commercial building energy efficiency case studies

SO DEFINING THE FUTURE OF SUSTAINABILITY AND RESILIENCE IN DESIGN, ENGINEERING AND CONSTRUCTION

SE Procedia Engineering

LA English

DT Proceedings Paper

CT Defining the Future of Sustainability and Resilience in Design, Engineering and Construction

CY MAY 10-13, 2015

CL Chicago, CA

SP ASCE, ICSDEC

DE Small commercial buildings; building energy efficiency; case study

AB Small commercial buildings, or those comprising less than 50,000 square feet of floor area, make up 90% of the total number of buildings in the United States. Though these buildings currently account for less than 50% of total energy consumption in the U.S., this statistic is expected to change as larger commercial buildings become more efficient and thus account for a smaller percentage of commercial building energy

consumption. This paper describes the efforts of a multi-organization collaboration and their demonstration partners in developing a library of case studies that promote and facilitate energy efficiency in the small commercial buildings market as well as a case study template that standardized the library. Case studies address five identified barriers to energy efficiency in the small commercial market, specifically lack of: 1) access to centralized, comprehensive, and consistent information about how to achieve energy targets, 2) reasonably achievable energy targets, 3) access to tools that measure buildings' progress toward targets, 4) financial incentives that make the reduction effort attractive, and 5) effective models of how disparate stakeholders can collaborate in commercial centers to reach targets. The case study library can be organized by location, ownership type, decision criteria, building type, project size, energy savings, end uses impacted, and retrofit measures. This paper discusses the process of developing the library and case study template. Finally, the paper presents next steps in demonstrating the efficacy of the library and explores energy savings potential from broad implementation. (C) 2015 Published by Elsevier Ltd.

C1 [Barnes, Elizabeth; Parrish, Kristen] Arizona State Univ, Sch Sustainable Engn & Built Environm, POB 873005, Tempe, AZ 85287 USA.

RP Parrish, K (reprint author), Arizona State Univ, Sch Sustainable Engn & Built Environm, POB 873005, Tempe, AZ 85287 USA.

EM Kristen.Parrish@asu.edu

CR Architecture 2030, 2015, 2030 DISTR

[Anonymous], 2013, SMALL BUILD BIT OPP

Langner Rois, 2013, NRELTP550057776

\*NAT TRUST HIST PR, REAL EN EFF POT SMAL

[Anonymous], 2013, REAL EN EFF POT SMAL

Thornton BA, 2010, TECHNICAL REPORTS

[Anonymous], COMM BUILD RES DAT

US Department of Energy, 2008, EN EFF TRENDS RES CO

U.S. Energy Information Administration, COMM BUILD EN CONS S

USA. Department of Energy. Energy Efficiency and Renewable Energy, 2013, DEFOA0000829

NR 10

TC 2

Z9 2

U1 0

U2 0

PU ELSEVIER SCIENCE BV

PI AMSTERDAM

PA SARA BURGERHARTSTRAAT 25, PO BOX 211, 1000 AE AMSTERDAM, NETHERLANDS

SN 1877-7058

J9 PROCEDIA ENGINEER

PY 2015

VL 118

BP 853

EP 860

DI 10.1016/j.proeng.2015.08.523

PG 8

WC GREEN & SUSTAINABLE SCIENCE & TECHNOLOGY; Engineering, Multidisciplinary

SC Science & Technology - Other Topics; Engineering

GA BF1RN

UT WOS:000380430700098

OA gold

DA 2018-05-03

ER

PT J

AU Pelenur, MJ

Cruikshank, HJ

AF Pelenur, Marcos J.

Cruikshank, Heather J.

TI Motivations to adopting energy efficiency measures in the home

SO PROCEEDINGS OF THE INSTITUTION OF CIVIL ENGINEERS-ENERGY

LA English

DT Article

DE buildings; structures & design; energy; energy conservation

ID MULTIWAY CONTINGENCY-TABLES; CHI-SQUARED TESTS; CONSERVATION; GAP; UK; INDEPENDENCE; CONSUMPTION; HOUSEHOLDS; PATTERNS; BARRIERS

AB This paper presents a study that linked demographic variables with motivations for the adoption of domestic energy efficiency measures in UK cities. This study complements a previous paper that identified barriers, and together, the two papers aim to improve understanding of the 'energy efficiency gap' and improve the effectiveness of future energy efficiency initiatives. The data for this study were collected from 149 general population interviews (1.5-10 min) carried out across multiple locations in Manchester and Cardiff. The demographic variables were statistically linked to the identified motivations using a modified chi-square test of association (first order Rao-Scott corrected to compensate for multiple response data), and the effect size was estimated with an odds ratio test. The results revealed that strong associations exist between demographics and motivations, specifically that saving money was associated with incomes greater than [SIC]40 000, married individuals and semi/detached homes; while the motivation of resource efficiency was associated with incomes less than [SIC]40 000, single individuals and flats/terraced homes. The results and recommendations are aimed at policy makers, local councils and members of the construction/retrofit industry who are all working to improve the energy efficiency of the domestic built environment.

C1 [Pelenur, Marcos J.] Univ Cambridge, Behav Insights Team, Cambridge, England.

[Cruickshank, Heather J.] Univ Cambridge, Ctr Sustainable Dev, Dept Engn, Cambridge, England.

RP Pelenur, MJ (reprint author), Univ Cambridge, Behav Insights Team, Cambridge, England.

FU EPSRC

FX This research was conducted at the University of Cambridge, Department of Engineering, Centre for Sustainable Development, and is part of the EPSRC funded research project: Re-Engineering the City 2020-2050 (Retrofit 2050) Urban Foresight and Transition Management. Finally, the authors would like to thank all of the friendly interviewees in Manchester and Cardiff.

CR Abrahamse W, 2009, J ECON PSYCHOL, V30, P711, DOI 10.1016/j.joep.2009.05.006

Agresti A, 1999, BIOMETRICS, V55, P936, DOI 10.1111/j.0006-341X.1999.00936.x

Allcott H, 2010, SCIENCE, V327, P1204, DOI 10.1126/science.1180775

Barr S, 2005, ENERG POLICY, V33, P1425, DOI 10.1016/j.enpol.2003.12.016

Bilder CR, 2004, BIOMETRICS, V60, P241, DOI 10.1111/j.0006-341X.2004.00147.x

BLACK JS, 1985, J APPL PSYCHOL, V70, P3, DOI 10.1037//0021-9010.70.1.3

Boyatzis R.E, 1998, TRANSFORMING QUALITA

Braun V., 2007, QUALITATIVE RES PSYC, V3, P77, DOI DOI 10.1191/1478088706QP0630A

Caird S, 2007, CAN CONSUMERS SAVE E

Caird S, 2008, ENERG EFFIC, V1, P149, DOI 10.1007/s12053-008-9013-y

Carlsson Kanyama, 2005, INT J CONSUM STUD, V29, P239, DOI [10.1111/j.1470-6431.2005.00409.x, DOI 10.1111/J.1470-6431.2005.00409.X]

Chappells H, 2005, BUILD RES INF, V33, P32, DOI 10.1080/0961321042000322762

Committee on Climate Change, 2011, CLIM CHANG ACT 2008

Committee on Climate Change, 2010, M CARB BUDG ENS LOW

Darby S, 2010, BUILD RES INF, V38, P442, DOI 10.1080/09613218.2010.492660

Darnton A, 2008, TECHNICAL REPORT

DILLMAN DA, 1983, J ECON PSYCHOL, V3, P299, DOI 10.1016/0167-4870(83)90008-9

ESPN (European Spatial Planning Observation Network), 2007, EUR SPAT URB PATT PL

Faiers A, 2007, ENERG POLICY, V35, P4381, DOI 10.1016/j.enpol.2007.01.003

Fereday J, 2008, INT J QUAL METH, V5, P80, DOI DOI 10.1007/S11136-011-0063-9

Fischer C, 2004, WHO USES INNOVATIVE

Friendly M, 1994, J AM STAT ASSOC, V89, P190, DOI DOI 10.2307/2291215

Geller H, 2006, ENERG POLICY, V34, P556, DOI 10.1016/j.enpol.2005.11.010

Gov. UK, 2013, GREEN DEAL EN SAV YO

GUERIN DA, 2000, FAMILY CONSUMER SCI, V29, P48, DOI DOI 10.1177/1077727X00291003

Hargreaves T, 2010, ENERG POLICY, V38, P6111, DOI 10.1016/j.enpol.2010.05.068

Institution of Mechanical Engineers, 2009, MAK OUR COMM REAL UK

JAFFE AB, 1994, ENER POLICY, V22, P804, DOI 10.1016/0301-4215(94)90138-4  
 Jakob M., 2007, DRIVERS BARRIERS ENE  
 Kelly MJ, 2009, BUILD RES INF, V37, P196, DOI 10.1080/09613210802645924  
 Lior N, 2010, ENERGY, V35, P3976, DOI 10.1016/j.energy.2010.03.034  
 LUTZENHISER L, 1992, ENERGY, V17, P47, DOI 10.1016/0360-5442(92)90032-U  
 Madlener R, 2009, ENERGY, V34, P370, DOI 10.1016/j.energy.2008.10.011  
 Mahapatra K, 2008, ENER POLICY, V36, P577, DOI 10.1016/j.enpol.2007.10.006  
 Mallaburn PS, 2014, ENER EFFIC, V7, P23, DOI 10.1007/s12053-013-9197-7  
 Marks David F, 2004, RES METHODS CLIN HLT  
 Mills E, 1996, ENERGY, V21, P707, DOI 10.1016/0360-5442(96)00005-9  
 Nair G, 2010, ENER POLICY, V38, P2956, DOI 10.1016/j.enpol.2010.01.033  
 National Consumer Council, 2006, SUST EN POL ALL NCCS  
 OLSEN ME, 1983, J ECON PSYCHOL, V4, P183, DOI 10.1016/0167-4870(83)90052-1  
 Oxera, 2006, POL EN EFF UK HOUS  
 Pelenur M, 2012, P RETR 2012 SALF UK  
 Pelenur M, 2011, SUBJECTIVE VIEW ENER  
 Pelenur MJ, 2012, ENERGY, V47, P348, DOI 10.1016/j.energy.2012.09.058  
 Planning Portal, 2013, APPR DOC CONS FUEL P  
 RAO JNK, 1981, J AM STAT ASSOC, V76, P221, DOI 10.2307/2287815  
 RAO JNK, 1984, ANN STAT, V12, P46, DOI 10.1214/aos/1176346391  
 Reddy BS, 2003, ENER POLICY, V31, P1117, DOI 10.1016/S0301-4215(02)00220-3  
 Retrofit 2050, 2012, RE ENG CIT 2020 2050  
 Rosenow J, 2012, 9 BIEE ACAD C OXF UK  
 Sardianou E, 2007, ENER POLICY, V35, P3778, DOI 10.1016/j.enpol.2007.01.020  
 Lutzenhiser L., 1998, HUMAN CHOICE CLIMATE, V2, P291  
 Stephenson J, 2010, ENER POLICY, V38, P6120, DOI 10.1016/j.enpol.2010.05.069  
 Thomas D.R., 2004, INT J TESTING, V4, P43  
 Thomas DR, 2000, STAT SOC CAN P SURV, P121  
 Vorsatz D, 2001, ENER POLICY, V29, P801  
 Weber L, 1997, ENER POLICY, V25, P833, DOI 10.1016/S0301-4215(97)00084-0  
 Yates D, 1999, PRACTICE STAT AP TI8  
 Zelezny LC, 2000, J SOC ISSUES, V56, P443, DOI 10.1111/0022-4537.00177

NR 59

TC 2

Z9 2

U1 1

U2 13

PU ICE PUBLISHING

PI WESTMINISTER

PA INST CIVIL ENGINEERS, 1 GREAT GEORGE ST, WESTMINISTER SW 1P 3AA, ENGLAND

SN 1751-4223

EI 1751-4231

J9 P I CIVIL ENG-ENERGY

J1 Proc. Inst. Civ. Eng.-Energy

PY 2014

VL 167

IS 3

BP 103

EP 116

DI 10.1680/ener.14.00013

PG 14

WC Energy & Fuels

SC Energy & Fuels

GA AS6IK

UT WOS:000344367200002

DA 2018-05-03

ER

PT J

AU Chen, JY

Taylor, JE

AF Chen, Jiayu

Taylor, John E.

TI Layering residential peer networks and geospatial building networks to model change in energy saving behaviors

SO ENERGY AND BUILDINGS

LA English

DT Article

DE Energy efficiency; Geospatial networks; Multi-layer network system; Networks; Peer networks; Simulation; Social network analysis

ID ELECTRICITY CONSUMPTION; TOPOLOGY; CONSERVATION; SIMULATION

AB Complex human or engineered network systems can be examined as a series of coexisting layers. A variety of dynamic perturbations, such as information flows across computer networks, traffic flows across transportation networks and the spread of energy saving practices across human networks, have been treated separately as single networks in previous research. However, because these phenomena often consist of human networks interacting with engineered networks, analyzing the properties of the multi-layer network systems may provide more accurate insights. In this paper, we examine a multi-layer network system to provide insight into the diffusion of energy consumption practices through peer networks within and across residential buildings. We introduce a new model—the Layered Network Model—that treats a residential peer network and a geospatial building network as a single, layered network. We compare this model to a previously published Multi-Layer Interactive Network Model by simulating diffusion through a real multi-layer network system consisting of a residential peer network and a geospatial building network from three experimental data-sets. We found our model to be more accurate and efficient, hence contributing an efficient mathematical model and set of simulation algorithms that accurately capture the post-perturbation response of a layered, residential peer network and a geospatial building network. (C) 2012 Elsevier B.V. All rights reserved.

C1 [Chen, Jiayu] Columbia Univ, Dept Civil Engn & Engrg Mech, New York, NY 10027 USA.

[Taylor, John E.] Virginia Tech, Charles E Via Jr Dept Civil & Environm Engrg, Blacksburg, VA 24061 USA.

RP Taylor, JE (reprint author), Virginia Tech, Charles E Via Jr Dept Civil & Environm Engrg, 113B Patton Hall, Blacksburg, VA 24061 USA.

EM jc3252@columbia.edu; jet@vt.edu

RI Taylor, John/F-1002-2011

OI Chen, Jiayu/0000-0001-9396-0059

FU National Science Foundation [1142379]

FX This material is based in part upon work supported by the National Science Foundation under Grant No. 1142379. Any opinions, findings, and conclusions or recommendations expressed in this material are those of the authors and do not necessarily reflect the views of the National Science Foundation.

CR Alam SJ, 2009, LECT NOTES ARTIF INT, V5044, P298, DOI 10.1007/978-3-642-01639-4\_26

Albert R, 2000, PHYS REV LETT, V85, P5234, DOI 10.1103/PhysRevLett.85.5234

Anderson R.M., 1991, INFECT DIS HUMANS DY

Azar E, 2012, J COMPUT CIVIL ENG, V26, P506, DOI 10.1061/(ASCE)CP.1943-5487.0000158

Bailey NTJ, 1975, MATH THEORY INFECT D

Barabasi AL, 1999, PHYSICA A, V272, P173, DOI 10.1016/S0378-4371(99)00291-5

Barabasi AL, 1999, SCIENCE, V286, P509, DOI 10.1126/science.286.5439.509

Bellovin S. M., 1993, COMPUT COMMUN REV, V23, P26

BURT RS, 1980, ANNU REV SOCIOL, V6, P79, DOI 10.1146/annurev.so.06.080180.000455

Chen JY, 2012, ENERGBUILDINGS, V47, P515, DOI 10.1016/j.enbuild.2011.12.026

Chung W, 2009, ENERGBUILDINGS, V41, P696, DOI 10.1016/j.enbuild.2009.02.001

Cohen R., 2002, HDB GRAPHS NETWORKS, P85

Ebel H., 2002, CONDMAT0201476 ARXIV

Erdos P, 1959, PUBL MATH-DEBRECEN, V6, P290, DOI 10.1234/12345678

Faloutsos M, 1999, COMP COMM R, V29, P251

Fischer C, 2008, ENERGBUILDINGS, V1, P79, DOI 10.1007/s12053-008-9009-7

Flament C., 1963, APPL GRAPH THEORY GR

- Hagerstrand T., 1968, INNOVATION DIFFUSION  
Heesterbeek J., 2000, MATH EPIDEMIOLOGY IN  
Hoes P, 2009, ENER BUILDINGS, V41, P295, DOI 10.1016/j.enbuild.2008.09.008  
Jain RK, 2012, ENER BUILDINGS, V48, P8, DOI 10.1016/j.enbuild.2011.12.033  
Kurant M, 2006, PHYS REV LETT, V96, DOI 10.1103/PhysRevLett.96.138701  
Leicht E.A., 2009, ARXIV09070894  
Maslov S, 2002, SCIENCE, V296, P910, DOI 10.1126/science.1065103  
McMakin AH, 2002, ENVIRON BEHAV, V34, P848, DOI 10.1177/001391602237252  
Moon IC, 2007, IEEE INTELL SYST, V22, P40, DOI 10.1109/MIS.2007.4338493  
MULLINS NC, 1973, THEORIES THEORY GROU  
Newman MEJ, 2001, PHYS REV E, V64, DOI [10.1103/PhysRevE.64.025102, 10.1103/PhysRevE.64.026118]  
OLSEN ME, 1981, J SOC ISSUES, V37, P108, DOI 10.1111/j.1540-4560.1981.tb02628.x  
Pastor-Satorras R, 2002, PHYS REV E, V65, DOI 10.1103/PhysRevE.65.036104  
Pastor-Satorras R, 2001, PHYS REV E, V63, DOI 10.1103/PhysRevE.63.066117  
Pastor-Satorras R, 2001, PHYS REV LETT, V86, P3200, DOI 10.1103/PhysRevLett.86.3200  
Pastor-Satorras R., 2002, HDB GRAPHS NETWORKS, P111  
Peschiera G, 2010, ENER BUILDINGS, V42, P1329, DOI 10.1016/j.enbuild.2010.03.001  
Petersen E., 2007, INT J SUSTAINABILITY, V8, P16, DOI DOI 10.1108/14676370710717562  
Ryan B, 1943, RURAL SOCIOL, V8, P15  
SCOTT J, 1988, SOCIOLOGY, V22, P109, DOI 10.1177/0038038588022001007  
Tichy N. M., 1979, ACAD MANAGE REV, V4, P507, DOI [DOI 10.2307/257851, DOI 10.5465/AMR.1979.4498309]  
US Energy Information Administration, 2010, ANN EN OUTL  
Weiss P., 1907, J PHYS, V6, P661, DOI DOI 10.1051/JPHYSTAP:019070060066100)  
Wellman B., 1997, CONT STUDIES SOCIOLO, V15, P19  
Xu ZW, 2008, GEOJOURNAL, V73, P87, DOI 10.1007/s10708-008-9173-5  
Yang JM, 2009, PHYSICA A, V388, P2435, DOI 10.1016/j.physa.2009.02.046  
Yu Z, 2011, ENER BUILDINGS, V43, P1409, DOI 10.1016/j.enbuild.2011.02.002

NR 44

TC 2

Z9 2

U1 0

U2 17

PU ELSEVIER SCIENCE SA

PI LAUSANNE

PA PO BOX 564, 1001 LAUSANNE, SWITZERLAND

SN 0378-7788

J9 ENER BUILDINGS

J1 Energy Build.

PD MAR

PY 2013

VL 58

BP 151

EP 162

DI 10.1016/j.enbuild.2012.11.027

PG 12

WC Construction & Building Technology; Energy & Fuels; Engineering, Civil

SC Construction & Building Technology; Energy & Fuels; Engineering

GA 112GH

UT WOS:000316580200017

DA 2018-05-03

ER

FN Clarivate Analytics Web of Science

VR 1.0

PT B

AU Hu, HF

Jenks, G

Huang, YH

Milencovic, M  
 Hanebutte, U  
 AF Hu, Huaifen  
 Jenks, Geoffrey  
 Huang, Yonghong  
 Milencovic, Milan  
 Hanebutte, Ulf

GP IEEE

TI Information and Communications Technology based Solutions in Achieving  
 Building Energy Efficiency

SO 2013 1ST IEEE CONFERENCE ON TECHNOLOGIES FOR SUSTAINABILITY (SUSTECH)

LA English

DT Proceedings Paper

CT 1st IEEE Conference on Technologies for Sustainability (SusTech)

CY AUG 01-02, 2013

CL Portland, OR

SP IEEE, IEEE Oregon Sect, IEEE USA

DE ICT; real-time response; occupant behavior; operational energy  
 efficiency

ID SIMULATION

AB Sophisticated and detailed building simulation tools are more commonly used by both architects and engineers in design process in hope to improve building energy efficiency. While building physics models being well developed and evolved in the past four decades, a surprisingly large and unexpected performance gap between the design intent and the actual operation continues to be observed and unsolved. Unaccounted dynamic occupant behavior in design stage is believed to be one of the significant contributing factors. On the other hand, the emerging and economic Information and Communications Technology (ICT) based sensing network has been showing great potential in better capturing occupant behavior dynamics during building operation. This paper introduces one ICT based solution - Personal Office Energy Monitor (POEM) developed by Intel Labs. Our preliminary results have shown POEM could be a promising noninvasive way of sensing real-time occupancy and informing the heating, ventilation and air conditioning (HVAC) system control for better operational energy efficiency. And a large scale of POEM deployments will result in a representative sample of occupancy profile in today's office environment, which researchers could use to develop a new occupancy profile for building design that reflect the actual office space utilization rate in today's organizational structure and flexible work arrangement and eventually lead to a more efficient building design.

C1 [Hu, Huaifen; Jenks, Geoffrey] Portland State Univ, Dept Mech & Mat Engr, Portland, OR 97207 USA.  
 [Huang, Yonghong; Milencovic, Milan; Hanebutte, Ulf] Intel Labs, Energy & Sustainability Lab, Hillsboro, OR 97124 USA.

RP Hu, HF (reprint author), Portland State Univ, Dept Mech & Mat Engr, Portland, OR 97207 USA.

EM hhu@pdx.edu; catherine.huang@intel.com

FU Intel Cooperation

FX This work is done in collaboration with the Energy and Sustainability  
 Research Lab in Intel Labs and funded by Intel Cooperation.

CR ASHRAE, 2004, 552004 ASHRAE

Brown K., 2012, P 2012 ACEEE SUMM ST

De Guglielmo D., 2012, SUSTAINABLE INTERNET, P1

Department of Energy, 2013, ENERGYPLUS

Deru M, 2011, US DEP EN COMM REF B

DesignBuilder Software Ltd, 2013, DESIGNBUILDER V3 2

Hoes P, 2009, ENER BUILDINGS, V41, P295, DOI 10.1016/j.enbuild.2008.09.008

Lenoir A., 2011, P 12 C INT BUILD PER, P8

Mahdavi A., 2011, P 12 C INT BUILD PER

Milencovic M., 2013, CHI 13 HUM FACT COMP

Milencovic M., 2013, P SENSORNETS 2013 BA

National Calculation Method, NCM DAT V4 1 D

Newsham GR, 2009, ENER BUILDINGS, V41, P897, DOI 10.1016/j.enbuild.2009.03.014

Nguyen T. A., 2013, ENER BUILDINGS, V56, P14

Page J, 2008, ENER BUILDINGS, V40, P83, DOI 10.1016/j.enbuild.2007.01.018



Scofield JH, 2009, ENERGBUILDINGS, V41, P1386, DOI 10.1016/j.enbuild.2009.08.006

Wang D, 2005, ENERGBUILDINGS, V37, P121, DOI 10.1016/j.enbuild.2004.06.015

Wang Z., 2012, AUT SCI ENG CASE 201, P804

NR 18

TC 2

Z9 2

U1 1

U2 4

PU IEEE

PI NEW YORK

PA 345 E 47TH ST, NEW YORK, NY 10017 USA

BN 978-1-4673-4630-6

PY 2013

BP 49

EP 54

PG 6

WC Computer Science, Hardware & Architecture; Engineering, Electrical & Electronic

SC Computer Science; Engineering

GA BA3WM

UT WOS:000335001300008

DA 2018-05-03

ER

PT J

AU Ferguson, TM

MacLean, HL

AF Ferguson, Thomas M.

MacLean, Heather L.

TI Trade-linked Canada-United States household environmental impact analysis of energy use and greenhouse gas emissions

SO ENERGY POLICY

LA English

DT Article

DE Input-output analysis; Life cycle assessment; Sustainable consumption

ID LIFE-CYCLE ASSESSMENT; INPUT-OUTPUT-ANALYSIS; SUSTAINABLE CONSUMPTION; COST; REQUIREMENTS; MODEL

AB We compare energy use and greenhouse gas (GHG) emissions associated with total household expenditures and activities in Canada and US in 1997, the first detailed estimate of environmental burdens for Canadian households. We estimate direct burdens from published government data and indirect burdens using an industry-by-commodity, bi-national economic input-output life cycle assessment model developed in this study. Comparing 30 expenditure and two activity categories, per capita US household expenditures were 70% higher, while per capita household energy use and GHG emissions were only 10% and 44% higher, respectively. Energy use/dollar of expenditure was higher in most Canadian categories, while the average ratio of GHG emissions/energy use was higher in the US (65 vs 50 kg Eq. CO<sub>2</sub>/GJ) due largely to a higher proportion of electricity from nonrenewable sources. Indirect environmental burdens represented 63-69% of total burdens and 62-70% of total burdens were associated with household operation and transportation. Key drivers of differences between energy profiles were: higher per capita electricity use by Canadian households, and higher US household private health care expenditures and motor fuel use. Energy-intensive production for export represented a higher proportion of Canadian production, resulting in less agreement between consumption and production-based analyses for Canada than US. (C) 2011 Elsevier Ltd. All rights reserved.

C1 [Ferguson, Thomas M.; MacLean, Heather L.] Univ Toronto, Dept Civil Engn, Toronto, ON M5S 1A4, Canada.

[MacLean, Heather L.] Univ Toronto, Sch Publ Policy & Governance, Dept Chem Engn & Appl Chem, Toronto, ON M5S 1A4, Canada.

RP MacLean, HL (reprint author), Univ Toronto, Dept Civil Engn, 35 St George St, Toronto, ON M5S 1A4, Canada.

- EM Heatherl.Maclean@utoronto.ca  
 FU Ontario Graduate Scholarship Program; Natural Sciences and Engineering  
 Research Council (Canada); AUTO21 Network Centre of Excellence; Ontario  
 Government; Carnegie Mellon University's Green Design Institute  
 FX We thank the Ontario Graduate Scholarship Program, Natural Sciences and  
 Engineering Research Council (Canada), AUTO21 Network Centre of  
 Excellence, and the Ontario Government Early Researcher Award as well as  
 Carnegie Mellon University's Green Design Institute.
- CR Alfredsson EC, 2004, ENERGY, V29, P513, DOI 10.1016/j.energy.2003.10.013  
 Bin S, 2005, ENER POLICY, V33, P197, DOI 10.1016/S0301-4215(03)00210-6  
 Bjorn A, 2005, CAN J CIVIL ENG, V32, P16, DOI 10.1139/L04-060  
 Boyd David R., 2001, CANADA VS OECD ENV C  
 BROWER M., 1999, CONSUMERS GUIDE EFFE  
 BULLARD CW, 1975, ENER POLICY, V3, P268, DOI 10.1016/0301-4215(75)90035-X  
 Bureau of Economic Analysis, 2006, BENCHM INP OUTP DAT  
 Bureau of Economic Analysis, 2010, TABL 1 US INT T  
 Bureau of Economic Analysis, 2006, 1997 STAND MAK US TA  
 Bureau of Economic Analysis, 2010, TABL 12 US INT T AR  
 Charpentier A.D., 2009, ENVIRON RES LETT, V2009, P4  
 Cohen C, 2005, ENER POLICY, V33, P555, DOI 10.1016/j.enpol.2003.08.021  
 Duchin F, 2005, J IND ECOL, V9, P99, DOI 10.1162/1088198054084707  
 Energy Information Administration, 1998, EM GREENH GAS US  
 Environment Canada (Greenhouse Gas Division), 2006, NAT INV REP 1990 200  
 Ghanem Z, 2005, STAT CANADAS INPUT O  
 Green Design Institute, 2005, RES LIF CYCL ASS  
 Guo J., 2002, 14 INT C INP OUTP TE  
 Hendrickson C., 1998, ENVIRON SCI TECHNOL, V32, P184, DOI DOI 10.1021/ES983471I  
 Hendrickson C. T., 2006, ENV LIFE CYCLE ASSES  
 Herendeen R., 1976, ENERGY, P165  
 HERENDEEN RA, 1981, ENERGY, V6, P1433, DOI 10.1016/0360-5442(81)90069-4  
 Hertwich EG, 2005, J IND ECOL, V9, P1, DOI 10.1162/1088198054084536  
 Hertwich E.G., 2005, SUSTAINABLE CONSUMPT, V2005/1, P161  
 \*IND CAN, 2006, TRAD DAT ONL  
 Intergovernmental Panel on Climate Change, 1996, REV 1996 IPCC GUID N, V1  
 Joshi S., 1999, J IND ECOL, V3, P95, DOI DOI 10.1162/108819899569449  
 Korytarova K., 2005, SUSTAINABLE CONSUMPT, V2005/1, P79  
 Lave L, 1995, ENVIRON SCI TECHNOL, V29, P420, DOI DOI 10.1021/ES00009A003  
 Lawson A., 2002, SURVEY CURR BUS, V82, P19  
 Lenzen M, 1998, ENERGY, V23, P497, DOI 10.1016/S0360-5442(98)00020-6  
 Lenzen M., 2004, ECON SYST RES, V16, P391, DOI DOI 10.1080/0953531042000304272  
 LONERGAN SC, 1985, J ENVIRON MANAGE, V20, P129  
 Moll HC, 2005, J IND ECOL, V9, P259, DOI 10.1162/1088198054084662  
 Munksgaard J, 2005, J IND ECOL, V9, P169, DOI 10.1162/1088198054084699  
 Nakamura Shinichiro, 2002, Journal of Industrial Ecology, V6, P39, DOI 10.1162/108819802320971632  
 National Energy Board, 2000, CAN OIL SANDS SUPPL  
 Natural Resources Canada, 2005, EN US DAT HDB 1990 1  
 Norman J, 2007, ENVIRON SCI TECHNOL, V41, P1523, DOI 10.1021/es.060082c  
 Organization for Economic Co-operation and Development, 2002, OECD OBSERVER JUL  
 Pachauri S, 2002, ENER POLICY, V30, P511, DOI 10.1016/S0301-4215(01)00119-7  
 Peters G., 2005, SUSTAINABLE CONSUMPT, V2005/1, P22  
 Peters GP, 2006, J IND ECOL, V10, P89, DOI 10.1162/jiec.2006.10.3.89  
 Reinders AHME, 2003, ENER POLICY, V31, P139, DOI 10.1016/S0301-4215(02)00019-8  
 Sinclair P, 2005, J IND ECOL, V9, P69, DOI 10.1162/1088198054084716  
 Statistics Canada, 2005, TABL 153 0032 EN US  
 Statistics Canada, 2002, CAN INT TRAD SERV 20  
 Statistics Canada, 2003, PURCH POW PAR REAL E  
 Statistics Canada, 2005, GREENH GAS EM CO2 EQ  
 Statistics Canada, 2005, TABL 381 0009 INP OU

Statistics Canada, 2005, TABL 381 0010 FIN DE  
Statistics Canada, 1990, GUID INC EXP ACC  
Statistics Canada, 1997, EC LINK ENV EC CONC  
Takase K, 2005, J IND ECOL, V9, P201, DOI 10.1162/1088198054084653  
United-Nations, 2002, REP WORLD SUMM SUST  
US Energy Information Administration (EIA), 1998, EM GREENH GAS US 199  
U.S. Energy Information Administration (EIA), 2005, ANN EN REV 2004  
US Energy Information Administration (EIA), 2005, HOUS VEH EN US LAT D  
US Energy Information Administration (EIA), 1997, HOUS VEH EN CONS  
US Environmental Protection Agency, 1999, INV US GREENH GAS EM  
Weber CL, 2007, ENVIRON SCI TECHNOL, V41, P4875, DOI 10.1021/es0629110  
Weber CL, 2008, ECOL ECON, V66, P379, DOI 10.1016/j.ecolecon.2007.09.021  
Weber C.L, 2008, ENER POLICY, V37, P1561  
WIEDMANN T, 2007, INT EC FOOTPR C CARD  
Woolhandler S, 2003, NEW ENGL J MED, V349, P768, DOI 10.1056/NEJMsa022033

NR 65  
TC 2  
Z9 2  
U1 3  
U2 24  
PU ELSEVIER SCI LTD  
PI OXFORD  
PA THE BOULEVARD, LANGFORD LANE, KIDLINGTON, OXFORD OX5 1GB, OXON, ENGLAND  
SN 0301-4215  
J9 ENER POLICY  
JI Energy Policy  
PD DEC  
PY 2011  
VL 39  
IS 12  
BP 8011  
EP 8021  
DI 10.1016/j.enpol.2011.09.056  
PG 11  
WC Economics; Energy & Fuels; Environmental Sciences; Environmental Studies  
SC Business & Economics; Energy & Fuels; Environmental Sciences & Ecology  
GA 866EN  
UT WOS:000298363400052  
DA 2018-05-03  
ER

PT J  
AU Roussac, AC  
de Dear, R  
Hyde, R  
AF Roussac, A. Craig  
de Dear, Richard  
Hyde, Richard  
TI Quantifying the 'human factor' in office building energy efficiency: a  
mixed-method approach  
SO ARCHITECTURAL SCIENCE REVIEW  
LA English  
DT Article  
DE Commercial buildings; conceptual frameworks; energy efficiency; office  
buildings; social theory  
AB There is an urgent need to understand the role that human competency, values and interests play in  
determining the energy efficiency of Australian commercial office buildings. Research focused on the  
interaction between building technologies and the people who operate them is therefore required,

especially in the case of older buildings where accessible and cost-effective technologies and know-how that can abate greenhouse gas emissions have not, as yet, been widely adopted. We need to ground this analysis in 'real-world' operational data rather than speculative models. This article proposes a mixed-method approach for defining and quantifying the extent to which operations staff and other key decision makers influence the energy efficiency of occupied Australian commercial office buildings, and presents preliminary findings.

C1 [Roussac, A. Craig] Univ Sydney, Australia & Investa Sustainabil Inst, Sydney, NSW 2006, Australia.

RP Roussac, AC (reprint author), Univ Sydney, Australia & Investa Sustainabil Inst, Sydney, NSW 2006, Australia.

EM croussac@investa.com.au

OI de Dear, Richard/0000-0002-3414-290X

CR Barker T, 2007, CLIMATE CHANGE 2007

BARONE M, 2009, CIT SYDN SUST SYDN 2

BLOCK LG, 1999, ELGER COMPANION CONS, P239

\*CTR INT EC, 2008, 2 PLANK BUILD LOW CA

\*DAV LANGD, 2009, RETR OFF AUSTR

Flyvbjerg B, 2001, MAKING SOCIAL SCI MA

Hersey P., 2001, MANAGEMENT ORG BEHAV

\*INV PROP GROUP, 2010, INV SUST REP 2009

IPCC, 2007, CLIM CHANG 2007 SYNT

Levine M., 2007, CLIMATE CHANGE 2007

MADEW R, 2009, COMMUNICATION

MAYER HR, 1980, DESIGN SOCIAL POLICY, P155

\*NAT GREENH GAS IN, 2009, KYOT PROT ACC FRAM

Popper K., 1972, LOGIC SCI DISCOVERY

\*PROP COUNC AUSTR, 2009, OFF MARK REP

ROUSSAC AC, 2009, PERFORMATIVE ECOLOGI

ROUSSAC AG, 2010, ETHICAL INVESTOR APR, P17

Syed A., 2007, AUSTR ENERGY NATL ST

\*UN ENV PROGR SBCI, 2006, SUST BUILD CONSTR IN

WADLEY D, 2010, ARCHITECTURAL SCI RE, V53, P9

Warren Centre for Advanced Engineering, 2009, LOW EN HIGH RIS BUIL

\*WBCSD, EN EFF BUILD OV

Zeisel J., 1981, INQUIRY DESIGN TOOLS

NR 23

TC 2

Z9 2

U1 0

U2 5

PU EARTHSCAN

PI LONDON

PA 14A ST CROSS STREET, LONDON, EC1N 8XA, ENGLAND

SN 0003-8628

J9 ARCHIT SCI REV

Jl Archit. Sci. Rev.

PD MAY

PY 2011

VL 54

IS 2

SI SI

BP 124

EP 131

DI 10.1080/00038628.2011.582371

PG 8

WC Architecture

SC Architecture

GA 797EA

UT WOS:000293106100006

DA 2018-05-03  
ER

PT J

AU Trebilcock, M

AF Trebilcock, M.

TI Perception of barriers to the inclusion of energy efficiency criteria in  
buildings

SO REVISTA DE LA CONSTRUCCION

LA Spanish

DT Article

DE energy efficiency; barriers; motivations; incentives

AB This article analyses the main barriers to energy-efficiency perceived by groups of architects who work in the public and private sectors in the main cities of the centre and south of Chile. The methodology was based on Focus Groups of architects from Temuco, Valdivia, Concepcion and Santiago who are experienced in these issues, or at least show a growing interest. The information gathered was organised around groups of barriers of different nature that were compared with the main personal motivations and also with the main external incentives perceived by the architects. The methodology also made it possible to distinguish different barriers and motivations coming from the groups of different cities that respond to local characteristics such as climate and specific socio-political situations. The results suggest that the main motivations for Chilean architects respond to aims of professional development and social responsibility; while the main barriers respond to multiple causes, from higher investment costs and lack of financial incentives to the important barriers of lack of knowledge and professional competence in these issues. The conclusions identify the main implications of this study for education, where the results suggest the necessity of covering education in energy efficiency along the complete application chain, from postgraduate studies to technical courses for construction workers, as well as the dissemination of knowledge for the whole society. In addition, the development of new policies in the area should focus on financial and tributary incentives, as well as more regulations with severe technical standards. The conclusions also suggest the necessity of a better articulation of the different institutions, which permit to generate more effective actions.

C1 Univ Bio Bio, Acad Dept Diseno & Teoria Arquitectura, Concepcion, Chile.

RP Trebilcock, M (reprint author), Univ Bio Bio, Acad Dept Diseno & Teoria Arquitectura, Avda Collao 1202, Concepcion, Chile.

EM mtrebilc@ubiobio.cl

RI Trebilcock, Maureen/C-7148-2011

OI Trebilcock, Maureen/0000-0002-1984-0259

CR \*APEC, 2009, REV EXP EF EN CHIL

\*CNE, 2007, BAL EN 2007

Groat L. N., 2002, ARCHITECTURAL RES ME

Guy S., 2000, SOCIOLOGY ENERGY BUI

\*I CONSTR, 2006, MAN APL REGL TERM

MALDONADO D, 2009, CERTIFICACION AMBIEN, P14

\*PPEE, 2009, MIS PROGR PAIS EF EN

\*PRIEN, 2008, INF FIN EST POT AH E

TREBILCOCK M, 2007, THESIS U NOTTINGHAM

NR 9

TC 2

Z9 4

U1 1

U2 12

PU PONTIFICIA UNIV CATOLICA CHILE, ESCUELA CONSTRUCCION CIVIL

PI SANTIAGO

PA AV VICUNA MACKENNA 4860, SANTIAGO, 0000, CHILE

SN 0718-915X

J9 REV CONSTR

JI Rev. Constr.

PD APR

PY 2011

VL 10

IS 1

BP 4

EP 14

DI 10.4067/S0718-915X2011000100002

PG 11

WC Construction &amp; Building Technology; Engineering, Civil

SC Construction &amp; Building Technology; Engineering

GA 795AA

UT WOS:000292942700002

OA gold

DA 2018-05-03

ER

PT J

AU Abeliotis, K

Nikolaou, N

Sardianou, E

AF Abeliotis, Konstadinos

Nikolaou, Niki

Sardianou, Eleni

TI Attitudes of Cypriot consumers on the ownership of household appliances:  
the case of the city of Limassol

SO INTERNATIONAL JOURNAL OF CONSUMER STUDIES

LA English

DT Article

DE Appliances; households; sustainability; technology

ID CONSUMPTION PATTERNS; BEHAVIOR

AB The aim of this paper is to analyse the factors affecting consumers' preferences towards the ownership of household appliances. The study is based on 186 survey responses from Cypriot households, and they are analysed econometrically using regression techniques. The analysis is based on a theoretical framework, which takes into account both demographic and economic factors behind households' preference to energy-efficient appliances. The results show that consumers that buy energy-efficient appliances are highly educated and women. Household income is not a statistically significant variable of the probability to choose an appliance based on its energy efficiency characteristics. On the contrary, income and number of persons per household affect the number of appliances that consumers own.

C1 [Abeliotis, Konstadinos; Nikolaou, Niki; Sardianou, Eleni] Harokopio Univ, Dept Home Econ & Ecol, Athens 17671, Greece.

RP Abeliotis, K (reprint author), Harokopio Univ, Dept Home Econ & Ecol, El Venizelou 70, Athens 17671, Greece.

EM kabeli@hua.gr

CR AALTOJARVI A, 2009, 5 EUR S GEND ICT U B

Abeliotis K, 2010, INT J CONSUM STUD, V34, P153, DOI 10.1111/j.1470-6431.2009.00833.x

ASTERIOU D., 2007, APPL ECONOMETRICS MO

Caraher M., 1999, British Food Journal, V101, P590, DOI 10.1108/00070709910288289

Darby L, 2005, RESOUR CONSERV RECY, V44, P17, DOI 10.1016/j.resconrec.2004.09.002

Efstathiou A, 2009, INT J CONSUM STUD, V33, P83, DOI 10.1111/j.1470-6431.2008.00732.x

Geppert J, 2010, INT J CONSUM STUD, V34, P219, DOI 10.1111/j.1470-6431.2009.00837.x

KASULIS JJ, 1981, J CONSUM RES, V8, P279, DOI 10.1086/208866

Richter CP, 2010, INT J CONSUM STUD, V34, P228, DOI 10.1111/j.1470-6431.2009.00839.x

Sardianou E, 2007, ENERG POLICY, V35, P3778, DOI 10.1016/j.enpol.2007.01.020

\*VORW, 2010, THERM

Zacarias-Farah A, 2003, J CLEAN PROD, V11, P819, DOI 10.1016/S0959-6526(02)00155-5

NR 12

TC 2

Z9 2

U1 0

U2 1

PU WILEY-BLACKWELL  
PI MALDEN  
PA COMMERCE PLACE, 350 MAIN ST, MALDEN 02148, MA USA  
SN 1470-6423  
J9 INT J CONSUM STUD  
JI Int. J. Consum. Stud.  
PD MAR  
PY 2011  
VL 35  
IS 2  
BP 132  
EP 137  
DI 10.1111/j.1470-6431.2010.00966.x  
PG 6  
WC Business  
SC Business & Economics  
GA 720VP  
UT WOS:000287311000004  
DA 2018-05-03  
ER

PT S

AU Yuan, Y

Yuan, JL

Du, HF

Li, L

AF Yuan, Yan

Yuan, Jingling

Du, Hongfu

Li, Li

BE Li, K

Li, X

Ma, S

Irwin, GW

TI Pareto Ant Colony Algorithm for Building Life Cycle Energy Consumption  
Optimization

SO LIFE SYSTEM MODELING AND INTELLIGENT COMPUTING, PT II

SE Communications in Computer and Information Science

LA English

DT Proceedings Paper

CT International Conference on Life System Modeling and Simulation /  
International Conference on Intelligent Computing for Sustainable Energy  
and Environment (LSMS-ICSEE)

CY SEP 17-20, 2010

CL Wuxi, PEOPLES R CHINA

SP Shanghai Univ, Queens Univ, Jiangnan Univ, CASS, Syst Modeling & Simulat Techn Comm, China  
Instrument & Control Soc, Embedded Instrument & Syst Techn Comm

DE ant colony algorithm; building life cycle; building energy consumption;  
multi-objective optimization

AB This article aims at realizing optimal building energy consumption in its whole life cycle, and develops building life cycle energy consumption model (BLCECM), as well as optimizes the model by Ant Colony Algorithm (ACA). Aiming at the complexity and multi-objective principle of building life cycle energy consumption, this research tries to modify Pareto Ant Colony Algorithm (PACA), making it fit the needs of finding solution to least energy consumption in a building's whole life cycle. In the initial stage of ant colony constructing solution, each objective weighing is defined randomly, which improves the optimal determination mechanism of Pareto solution, perfects the renovation principle of pheromone, and finally realize the goal of optimization. This research is a innovative application of ACA in building energy-saving

area, and it provides definite as well as practical calculation method for building energy consumption optimization in terms of a whole life cycle.

C1 [Yuan, Yan; Li, Li] Wuhan Univ, Sch Urban Design, LuoJia Hill, Wuhan 430072, Peoples R China.

[Yuan, Jingling; Du, Hongfu] Wuhan Univ Technol, Comp Sci & Technol Sch, Wuhan 430070, Peoples R China.

RP Yuan, Y (reprint author), Wuhan Univ, Sch Urban Design, LuoJia Hill, Wuhan 430072, Peoples R China.

EM Shyy98@163.com; yjl@whut.edu.cn

CR Coloni D.M., 1991, P EUR C ART LIF PAR, P134

Dorigo M., 1997, IEEE Transactions on Evolutionary Computation, V1, P53, DOI 10.1109/4235.585892

Dorigo M, 1996, IEEE T SYST MAN CY B, V26, P29, DOI 10.1109/3477.484436

Gu Daojin, 2006, Journal of Tsinghua University (Science and Technology), V46, P1953

Verbeeck G, 2010, BUILD ENVIRON, V45, P1037, DOI 10.1016/j.buildenv.2009.10.012

The Weidt Group, 2009, ENERGY EFFICIENCY, V2, P69

NR 6

TC 2

Z9 2

U1 1

U2 1

PU SPRINGER-VERLAG BERLIN

PI BERLIN

PA HEIDELBERGER PLATZ 3, D-14197 BERLIN, GERMANY

SN 1865-0929

EI 1865-0937

BN 978-3-642-15858-2

J9 COMM COM INF SC

PY 2010

VL 98

BP 59

EP +

PG 2

WC Computer Science, Artificial Intelligence; Computer Science, Information Systems; Computer Science, Theory & Methods; Mathematical & Computational Biology

SC Computer Science; Mathematical & Computational Biology

GA BUC71

UT WOS:000288890300009

DA 2018-05-03

ER

PT J

AU Amos-Abanyie, S

Akuffo, FO

Quagrain, V

AF Amos-Abanyie, Samuel

Akuffo, Fred O.

Quagrain, Victor

TI Unveiling Energy Saving Techniques for Cooling in Residential Buildings in Ghana

SO INTERNATIONAL JOURNAL OF VENTILATION

LA English

DT Article

DE bioclimatic approach; comfort zone; passive cooling techniques; thermal comfort; Ghana

ID NIGHT VENTILATION; COMFORT; ZONES

AB The gradual shift from the traditional approach of outdoor processes of habitation in Ghana to the indoor, coupled with an ingress of solar radiation, liberates excess heat into buildings and makes occupants feel uncomfortable. A straightforward response has been the adoption of air conditioners. This has resulted in high peak electricity demand and excess emissions of greenhouse gases into the atmosphere. This paper



identifies passive and low energy techniques which can improve the thermal comfort in buildings for the different climate zones of Ghana, and consequently reduce electricity demand and environmental effects due to air conditioning. The potential for various passive and low energy cooling techniques was determined by plotting climatic data comprising average monthly temperature and relative humidity over a thirty year period (1976-2005) for a total of ten towns and cities from the various climatic zones of Ghana on the Building Bioclimatic chart. This work is aimed at encouraging innovative and individual design solutions amongst building design professionals applicable to Ghana and regions elsewhere that are experiencing a growth in air conditioning. Reducing peak cooling-energy demand is of great interest to the power generating industries and policy makers. It is of interest to building investors, since it implies a possible reduction in the required installed plant capacity. This is also an essential element in Ghana's Climate Change Mitigation Program.

C1 [Amos-Abanyie, Samuel; Quagrain, Victor] Kwame Nkrumah Univ Sci & Technol, Dept Architecture, Kumasi, Ghana.

[Akuffo, Fred O.] Kwame Nkrumah Univ Sci & Technol, Dept Mech Engn, Kumasi, Ghana.

RP Amos-Abanyie, S (reprint author), Kwame Nkrumah Univ Sci & Technol, Dept Architecture, Kumasi, Ghana.

CR AMOSABANYIE S, 2006, J SCI TECHNOLOGY KWA, V26

Beggs C, 2002, ENERGY MANAGEMENT SU

BOATENG EA, 1982, GEOGRAPHY GHANA

Constantine S, 1999, GHANA RESIDENTIAL EN

Cook J, 1989, PASSIVE COOLING

Corgnati SP, 2007, BUILD ENVIRON, V42, P3285, DOI 10.1016/j.buildenv.2006.08.018

Dickson K. B., 1988, NEW GEOGRAPHY GHANA

ESSIEN F, 1968, 21 BRRI

Evans JM, 2003, ENERGBUILDINGS, V35, P87, DOI 10.1016/S0378-7788(02)00083-X

Fanger P. O., 1972, THERMAL COMFORT ANAL

Geros V, 1999, ENERGBUILDINGS, V29, P141, DOI 10.1016/S0378-7788(98)00056-5

Ghiabaklou Z, 2003, BUILD ENVIRON, V38, P883, DOI 10.1016/S0360-1323(03)00028-3

GIVONI B, 1992, ENERGBUILDINGS, V18, P11, DOI 10.1016/0378-7788(92)90047-K

Givoni B., 1998, CLIMATE CONSIDERATIO

Givoni B, 1976, MAN CLIMATE ARCHITEC

GIVONI B, 1994, PASSIVE LOW ENERGY C, P1

\*GSS, 2000, 2000 POP HOUS CENS S, P11

GUT P, 1993, CLIMATE RESPONSIVE B, P37

HUANG J, 2004, LOW ENERGY COOLING S

IPCC, 2007, CLIM CHANG 2007 SYNT

Kolokotroni M, 1999, APPL ENERGB, V63, P241, DOI 10.1016/S0306-2619(99)00031-8

LAIN L, 2005, PASSIVE LOW ENERGY C

Lam JC, 2006, ENERGBUILDINGS, V47, P746, DOI 10.1016/j.enconman.2005.05.025

LAROCHE P, 2005, 2005 WORLD SUST BUIL

LECHNER B, 2001, HEATING COOLING LIGH

Milne M, 1979, ENERGY CONSERVATION, P96

Ofosu-Ahenkorah A K, 2007, ENERGY CRISES GHANA, P16

Olgay V. G., 1963, DESIGN CLIMATE BIOCL

Sackey T., 2007, ENERGY CRISES GHANA, P6

Santamouris M., 2001, ENERGY CLIMATE URBAN

Santamouris M., 2005, PASSIVE COOLING BUIL

Singh MK, 2007, ENERGBUILDINGS, V39, P1250, DOI 10.1016/j.enbuild.2007.01.015

SMALL I, 1967, 20 BRRI

Szokolay S. V., 2004, INTRO ARCHITECTURAL

Upadhyay A.K., 2006, J ASIAN ARCHIT BUILD, P169

VISITAK JS, 2004, SIMBUILD 2004 NAT C

Watson D., 1983, CLIMATIC BUILDING DE

YANNAS S, 1995, P CLIM RESP EN EFF A

NR 38

TC 2

Z9 2

U1 0

U2 3  
 PU VEETECH LTD  
 PI CONVENTRY  
 PA 7A BARCLAYS VENTURE CENTRE, UNIV WARWICK SCI PARK, SIR WILLIAM LYONS RD,  
 CONVENTRY, CV4 7EZ, ENGLAND  
 SN 1473-3315  
 J9 INT J VENT  
 JI Int. J. Vent.  
 PD JUN  
 PY 2009  
 VL 8  
 IS 1  
 BP 23  
 EP 35  
 PG 13  
 WC Construction & Building Technology; Energy & Fuels  
 SC Construction & Building Technology; Energy & Fuels  
 GA 613QL  
 UT WOS:000278994100003  
 DA 2018-05-03  
 ER

PT B  
 AU Chen, YP  
 Mu, XM  
 Zhang, JL  
 Lu, Z  
 AF Chen Yongpan  
 Mu Xianmin  
 Zhang Jili  
 Lu Zhen  
 BE Zhou, QH  
 TI Development of Monitoring System of Building Energy Consumption  
 SO 2009 INTERNATIONAL FORUM ON COMPUTER SCIENCE-TECHNOLOGY AND  
 APPLICATIONS, VOL 2, PROCEEDINGS  
 LA English  
 DT Proceedings Paper  
 CT International Forum on Computer Science-Technology and Applications  
 CY DEC 25-27, 2009  
 CL Chongqing, PEOPLES R CHINA  
 SP Int Informat Techn & Applicat Assoc  
 DE building energy consumption; monitoring system; multi-tier distributed  
 application services; database  
 AB dIn order to solve the serious problem of high energy consumption in large public buildings and  
 government office buildings, this paper develops the monitoring system of building energy consumption  
 (MSBEC), which could monitor not only energy consumption data, but also energy quality. Firstly, this  
 paper designs the hardware subsystem with three-layer structure. At the information center layer, four  
 data acquiring servers are linked with a double control disk array subsystem, which ensures the stability of  
 monitoring system. The network layer adopts the RS485-TCP/IP mode and the RS485-ZigBee-TCP/IP mode  
 to collect information from RS485 protocol terminal modules. Then this paper introduces the software  
 subsystem with multi-tier distributed application services, which contains the persistence layer, the  
 application layer, and the representation layer. Every layer is independent relatively, and may be  
 developed by different technology. Based on the sufficient energy monitoring data, MSBEC could provide  
 technical support for later energy retrofit.  
 C1 [Chen Yongpan] Harbin Inst Technol, Sch Municipal & Environm Engn, Harbin 150090, Heilongjiang,  
 Peoples R China.  
 [Mu Xianmin; Zhang Jili; Lu Zhen] Dalian Univ Technol, Sch Civil & Hydraul Engn, Dalian 116024,  
 Peoples R China.

RP Chen, YP (reprint author), Harbin Inst Technol, Sch Municipal & Environm Engrn, Harbin 150090, Heilongjiang, Peoples R China.

EM cyp257@126.com; muxm@dlut.edu.cn; zhangjili@hit.edu.cn; zluhit@126.com

FU National Natural Science Foundation of China [50578049]; Key Projects in the National Science & Technology Pillar Program in the Eleventh Five-year Plan Period [2006BAJ01A09, 2008BAJ12B05]

FX This project is supported by National Natural Science Foundation of China (50578049) and Key Projects in the National Science & Technology Pillar Program in the Eleventh Five-year Plan Period (2006BAJ01A09, 2008BAJ12B05).

CR Haberl J, 1996, ENER BUILDINGS, V24, P27, DOI 10.1016/0378-7788(95)00959-0

Han J. W., 2001, DATA MINING CONCEPTS

KINNEY S, 2002, ACEEE 2002 SUMMER ST, P109

Leander Rick, 2000, BUILDING APPL SERVER

LIANG J, 2007, HV AC, V37, P13

Lindberg R, 2004, ENER BUILDINGS, V36, P495, DOI 10.1016/j.enbuild.2003.12.009

MIAO ZH, 2007, B SURVEYING MAPPING, V11, P60

MIAO ZH, 2007, B SURVEYING MAPPING, V11, P46

Olofsson T, 2009, ENER BUILDINGS, V41, P71, DOI 10.1016/j.enbuild.2008.07.012

SONG XM, 2007, INFORM CHINA CONSTRU, V18, P39

NR 10

TC 2

Z9 2

U1 2

U2 2

PU IEEE COMPUTER SOC

PI LOS ALAMITOS

PA 10662 LOS VAQUEROS CIRCLE, PO BOX 3014, LOS ALAMITOS, CA 90720-1264 USA

BN 978-0-7695-3930-0

PY 2009

BP 363

EP +

DI 10.1109/IFCSTA.2009.211

PG 2

WC Computer Science, Interdisciplinary Applications

SC Computer Science

GA BOK74

UT WOS:000276907000091

DA 2018-05-03

ER

PT J

AU Yik, FWH

Lee, WL

AF Yik, FWH

Lee, WL

TI Rebate as an economic instrument for promoting building energy efficiency in Hong Kong

SO BUILDING AND ENVIRONMENT

LA English

DT Article

DE demand side management; rebate; energy efficiency; economics

ID DEMAND-SIDE MANAGEMENT; UTILITY DSM; BARRIERS; STRATEGIES; CAPACITY

AB Economic principles have been applied to elicit the conditions under which there will be benefit to power companies in offering rebates to consumers to encourage them to adopt energy saving measures. The analysis also provides an answer to how rebate rate should be determined to maximise social benefit. However, the analysis of the rebate-based demand side management (DSM) programmes launched by the two power companies in Hong Kong in the year 2000 showed that the prerequisite conditions that would

permit the power companies to derive benefits from the programmes were unlikely to exist. This suggests that use of this economic instrument for promoting energy efficiency requires governmental influence; it will not emerge solely as a commercial decision of the power companies in Hong Kong. (c) 2004 Elsevier Ltd. All rights reserved.

C1 Hong Kong Polytech Univ, Dept Bldg Serv Engr, Kowloon, Hong Kong, Peoples R China.

RP Yik, FWH (reprint author), Hong Kong Polytech Univ, Dept Bldg Serv Engr, Kowloon, Hong Kong, Peoples R China.

EM bewhyik@polyu.edu.hk

OI LEE, Wai Ling/0000-0001-5669-2809

CR Ashok S, 2003, ENERGY, V28, P115, DOI 10.1016/S0360-5442(02)00109-3

BERRY L, 1990, ORNLCON299

Boyle S, 1996, ENER POLICY, V24, P345, DOI 10.1016/0301-4215(95)00142-5

Byrne J, 1996, ENER POLICY, V24, P177, DOI 10.1016/0301-4215(95)00106-9

CHAO C, 2000, J COMP ECON, V29, P314

\*CLP HOLD HONG KON, 2000, DSM HDB

\*CLP POW HONG KONG, 2002, CHIN LIGHT POW ANN R

Cole RJ, 1998, BUILD RES INF, V26, P3, DOI 10.1080/096132198370065

Cotler P, 1995, J DEV ECON, V48, P189, DOI 10.1016/0304-3878(95)00043-7

\*CSD, 2001, HONG KONG EN STAT AN

\*CSD, 2001, HONG KONG POP BY CEN

Daniel JI, 2001, J URBAN ECON, V50, P230, DOI 10.1006/juec.2000.2210

DAVIS WB, 1994, 2 US DOE US EC SER O

DeCanio SJ, 1998, ENER POLICY, V26, P441, DOI 10.1016/S0301-4215(97)00152-3

\*EPD, 2003, HONG KONG GREENH GAS

ETO J, 1996, ELECT J, V9, P76

GALE I, 1987, ECON LETT, V23, P229, DOI 10.1016/0165-1765(87)90156-X

Gehring K. L., 2002, ELECT J, V15, P63

GREENE DL, 1991, ECON INQ, V29, P101, DOI 10.1111/j.1465-7295.1991.tb01256.x

Helle C., 1997, UTIL POLICY, V6, P75

\*HONGK EL CO LTD, 2000, HONGK EL CO ANN REP

\*HONGK EL CO LTD H, 1999, SUPPL AGR RESP SCHEM

\*HONK EL CO LTD, 2000, DSM HDB

HOWARTH RB, 1993, ENER ECON, V15, P262, DOI 10.1016/0140-9883(93)90016-K

LAM PL, 1996, SCHEME CONTROL ELECT

Lee WL, 2002, BUILD ENVIRON, V37, P1385, DOI 10.1016/S0360-1323(02)00006-9

Lombard C, 1999, ENER BUILDINGS, V29, P229, DOI 10.1016/S0378-7788(98)00064-4

Malik AS, 2001, INT J ELEC POWER, V23, P413, DOI 10.1016/S0142-0615(00)00077-6

Nadel S, 1996, ENER POLICY, V24, P289, DOI 10.1016/0301-4215(95)00137-9

Nadel S., 1990, LESSONS LEARNED REV

NEWCOMB J, 1994, ELECT J, V7, P34

OLERUP B, 1994, UTILITIES POLICY, P273

Pacudan R, 2002, ENER ECON, V24, P41, DOI 10.1016/S0140-9883(01)00085-8

Painuly JP, 2003, J CLEAN PROD, V11, P659, DOI 10.1016/S0959-6526(02)00111-7

Pantelimon L, 1999, APPL ENER, V64, P307, DOI 10.1016/S0306-2619(99)00103-8

Rahman S, 1996, ENERGY, V21, P401, DOI 10.1016/0360-5442(95)00113-1

Train KE, 1997, TRANSPORT RES E-LOG, V33, P1, DOI 10.1016/S1366-5545(97)00003-3

USDOE (US Department of Energy), 1995, DOEEIA058994

WOOLF T, 1993, UTILITIES POLICY JUL, P233

Yik FWH, 1995, ENER ENG, V92, P6

Yik FWH, 2001, ENER BUILDINGS, V33, P167, DOI 10.1016/S0378-7788(00)00095-5

Yik F. W. H, 2002, HKIE T, V9, P32

1999, PR NEWSWIRE 0603

NR 43

TC 2

Z9 2

U1 0

U2 2

PU PERGAMON-ELSEVIER SCIENCE LTD

PI OXFORD  
 PA THE BOULEVARD, LANGFORD LANE, KIDLINGTON, OXFORD OX5 1GB, ENGLAND  
 SN 0360-1323  
 J9 BUILD ENVIRON  
 JI Build. Environ.  
 PD SEP  
 PY 2005  
 VL 40  
 IS 9  
 BP 1207  
 EP 1216  
 DI 10.1016/j.buildenv.2004.10.007  
 PG 10  
 WC Construction & Building Technology; Engineering, Environmental;  
 Engineering, Civil  
 SC Construction & Building Technology; Engineering  
 GA 945JX  
 UT WOS:000230499900006  
 DA 2018-05-03  
 ER

PT J  
 AU Filippin, C  
 AF Filippin, C.  
 TI Energy use of buildings in central Argentina  
 SO JOURNAL OF BUILDING PHYSICS  
 LA English  
 DT Article

DE energy efficient envelope; energy behavior; energy saving

AB The present work analyzes the consumption of energy of three typologically and technologically different buildings, and its interaction with dimensional, morphological, and thermal indicators. The comparison of heat energy consumed by the conventional and the solar buildings (individual and apartments) allows the evaluation of the energy saved through the use of passive solar techniques and thermal envelopes. The study buildings are located in Santa Rosa (capital of the province of La Pampa) in Argentina. The latitudinal variation of degree days oscillates between 1300 and 1600 degrees C to the north and the south, respectively. The results show the high correlation between the energy consumption and the energy loss through the building's envelope. In buildings with conventional technology, the envelope (without insulation) reaches a G value of 4.13 W/m(3)degrees C, higher than the admissible maximum value stipulated by the N. IRAM 11604 for the study region. The technologically optimized construction through the use of an energy-efficient envelope, a carpentry with double glazing, and a collecting area of 12% with respect to the building's useful area allowed an energy saving of around 75% during winter. The results confirm the large potential of the solar building design to reach significant levels of energy saving, and the comparison of solar and conventional buildings in terms of natural gas consumption confirms the magnitude of such a potential.

RP Filippin, C (reprint author), Spinetto 785, RA-6300 La Pampa, Argentina.

EM cfilippin@cpenet.com.ar

CR Anderson BR, 1985, BREDEM BRE DOMESTIC  
 BARTHOLOMEW DMJ, 1984, PASSIVE SOLAR ENERGY  
 BEHLING S, 2002, SOL POWER EVOLUCION, P20  
 \*BRECSU, 1995, GOOD PRACT GUID 73 E  
 \*BRECSU, 1997, PLANN PAS SOL HOUS D  
 \*BRECSU, 1997, 25 BRECSU  
 \*BRECSU, 1997, 27 BRECSU  
 \*BRECSU, 1995, 22 BRECSU  
 \*BRECSU, 1994, GOV STAND ASS PROC E  
 \*CEC, 2001, PROP DIR EUR PALR CO  
 CZAJKOWSKI J, 1994, INTRO DISENO BIOCLIM, P160  
 \*DIN EN, 2002, 832 DIN EN

DIPACE M, 1994, UTOPIAS MED AMBIENTE, P112  
 DOUGLAS B, 1992, PASSIVE SOLAR BUILDI  
 Filippin C, 1999, HABITAT INT, V23, P125  
 FILIPPIN C, 1995, ACT 27 REUN TRAB AS  
 FILIPPIN C, 2002, AVANCES ENERGIAS REN, V5  
 FILIPPIN C, 2002, ENERGIAS RENOVABLES, V2, P1  
 \*FUERZ AER ARG COM, 1992, EST CLIM 1981 1990  
 Givoni B, 1969, MAN CLIMATE ARCHITEC  
 Lewis J. O, 1994, ENERGY ARCHITECTURE  
 \*INENCO, 1984, PAUT DIS AC TERM ED  
 \*IPCC, 2003, CAMB CLIM 2001 MIT P  
 [Anonymous], 2001, 11604 IRAM  
 \*IRAM, 1992, 11603 IRAM  
 \*IRAM, 1991, 11625 IRAM  
 \*IRAM, 1996, 11605 IRAM  
 LENNSEN, 1955, SITUACION MUNDO, P165  
 MASCARO J, 1983, VARIACION COSTOS EDI, P21  
 Olgay V., 1963, DESIGN CLIMATE  
 ROSENFELD E, 1985, ACT 17 REUN TRAB ASA, P271  
 SMART G, 1986, ENERGY BUILDING, V9, P2013  
 STOPP H, 2003, ENERGY SAVING HIGROT  
 SZOKALAY S, 1997, C 14 INT C PASS LOW  
 UGLOW C. E., 1981, BUILD SERV ENG RES T, V2, P1  
 World Resources Institute, 2001, WORLD RES 2000 2001

NR 36

TC 2

Z9 2

U1 1

U2 3

PU SAGE PUBLICATIONS LTD

PI LONDON

PA 1 OLIVERS YARD, 55 CITY ROAD, LONDON EC1Y 1SP, ENGLAND

SN 1744-2591

J9 J BUILD PHYS

J1 J. Build Phys.

PD JUL

PY 2005

VL 29

IS 1

BP 69

EP 89

DI 10.1177/1744259105051798

PG 21

WC Construction & Building Technology

SC Construction & Building Technology

GA 178DW

UT WOS:000247202400006

DA 2018-05-03

ER

PT J

AU Dominguez-Amarillo, S

Fernandez-Aguera, J

Fernandez-Aguera, P

AF Dominguez-Amarillo, Samuel

Fernandez-Aguera, Jesica

Fernandez-Aguera, Patricia

TI TEACHING INNOVATION AND THE USE OF SOCIAL NETWORKS IN ARCHITECTURE:

## LEARNING BUILDING SERVICES DESIGN FOR SMART AND ENERGY EFFICIENT BUILDINGS

SO ARCHNET-IJAR INTERNATIONAL JOURNAL OF ARCHITECTURAL RESEARCH

LA English

DT Article

DE undergraduates; education; teaching innovation; gamification; energy efficiency

ID PEDAGOGY

AB Today's buildings are evolving from structures comprising unchanging, static elements scantily able to interact with their surroundings, towards complex systemic compounds with an impact on the environs that entails more than mere anthropic alteration. In pursuit of energy efficiency and true sustainability, buildings must acquire the ability to interact as well as to generate synergies. The most prominent features of this approach are energy management and information flows which, intelligently designed, not only enhance buildings' capabilities, but also introduce a significant change in their relationship with the surrounds ('smart cities') and its inhabitants. This new paradigm calls for revisiting undergraduate architectural instruction, adopting a more complex overview of energy use and management in the design process, regarding buildings as dynamic rather than static entities. The methodology focuses on creating learning environments that favour students' participation in problem solving and assessment, encouraging teamwork based on case studies and stressing the connection between this new architecture, ICTs included, and social networks as participatory design tools. These ideas were implemented in a pilot learning experience conducted at the University of Seville for undergraduate students. The use of ICTs and the collaboration of non-academic experts were observed to further student promotion and projection beyond the academic environment and introduce them to the professional community.

C1 [Dominguez-Amarillo, Samuel] Univ Seville, Inst Univ Arquitectura & Ciencias Construcc, Escuela Tecn Super Arquitectura, Avda Reina Mercedes 2, E-41012 Seville, Spain.

[Fernandez-Aguera, Jesica] CSIC, Inst Ciencias Construcc Eduardo Torroja, Serrano Galvache 4, Madrid, Spain.

[Fernandez-Aguera, Patricia] Univ Seville, Fac Psicol, C Camilo Jose Cela, Seville 41018, Spain.

RP Dominguez-Amarillo, S (reprint author), Univ Seville, Inst Univ Arquitectura & Ciencias Construcc, Escuela Tecn Super Arquitectura, Avda Reina Mercedes 2, E-41012 Seville, Spain.

EM sdomin@us.es

CR Beddoes KD, 2010, INTERDISCIP J PROBL-, V4, P7, DOI 10.7771/1541-5015.1142

Burns C., 2017, J TECHNOLOGY MANAGEM

Felder R. M., 2000, CHEM ENG EDUC, V34, P26

Grant A. M., 2014, GIVE TAKE WHY HELPIN

Hawas A, 2017, ENRGY PROCED, V105, P2615, DOI 10.1016/j.egypro.2017.03.753

Malmi L., 2016, EUROPEAN J ENG ED

Nabih HE, 2010, ARCHNET-IJAR, V4, P90

Ng BH, 2013, ARCHNET-IJAR, V7, P8

Pierrakos O., 2016, IEEE FRONT ED C FIE

Salama A. M., 2015, SPATIAL DESIGN ED NE

Salama AM, 2012, PROCD SOC BEHV, V49, P8, DOI 10.1016/j.sbspro.2012.07.002

Solis M, 2012, J LEARN DISABIL-US, V45, P327, DOI 10.1177/0022219411402691

Vassigh S, 2014, ENRGY PROCED, V57, P2062, DOI 10.1016/j.egypro.2014.10.171

[Anonymous], J LEARNING DISABILIT, V45, P327

NR 14

TC 1

Z9 1

U1 0

U2 0

PU ARCHNET-IJAR

PI CAMBRIDGE

PA AGA KHAN DOCUMENTATION CENTER, MIT, BUILDING 7-238, 77 MASSACHUSETTS AVE, CAMBRIDGE, MA 02139 USA

EI 1938-7806

J9 ARCHNET-IJAR

JI Archnet-IJAR

PD MAR

PY 2018  
VL 12  
IS 1  
BP 367  
EP 375  
DI 10.26687/archnet-ijar.v12i1.1298  
PG 9  
WC Architecture  
SC Architecture  
GA GC4HZ  
UT WOS:000429746900022  
OA gold  
DA 2018-05-03  
ER

PT J  
AU Yu, BY  
    Wei, YM  
    Kei, G  
    Matsuoka, Y  
AF Yu, Biying  
    Wei, Yi-Ming  
    Kei, Gomi  
    Matsuoka, Yuzuru

TI Future scenarios for energy consumption and carbon emissions due to demographic transitions in Chinese households

SO NATURE ENERGY

LA English

DT Article

ID CO2 EMISSIONS; TIME USE; CLIMATE-CHANGE; UNITED-STATES; POPULATION; ENVIRONMENT; ALLOCATION; BEHAVIOR; DEMANDS; TRENDS

AB Population dynamics has been acknowledged as a key concern for projecting future emissions, partly because of the huge uncertainties related to human behaviour. However, the heterogeneous shifts of human behaviour in the process of demographic transition are not well explored when scrutinizing the impacts of population dynamics on carbon emissions. Here, we expand the existing population-economy-environment analytical structure to address the above limitations by representing the trend of demographic transitions to small-family and ageing society. We specifically accommodate for inter-and intra-life-stage variations in time allocation and consumption in the population rather than assuming a representative household, and take a less developed province, Sichuan, in China as the empirical context. Our results show that the demographic shift to small and ageing households will boost energy consumption and carbon emissions, driven by the joint variations in time-use and consumption patterns. Furthermore, biased pictures of changing emissions will emerge if the time effect is disregarded.

C1 [Yu, Biying; Wei, Yi-Ming] Beijing Inst Technol, Ctr Energy & Environm Policy Res, Beijing, Peoples R China.

[Yu, Biying; Wei, Yi-Ming] Beijing Inst Technol, Sch Management & Econ, Beijing, Peoples R China.

[Kei, Gomi] Natl Inst Environm Studies, Fukushima Branch, Fukasaku 10-2, Miharu, Fukushima, Japan.

[Matsuoka, Yuzuru] Kyoto Univ, Dept Environm Engrn, C Cluster, Nishikyo Ku, Kyoto, Japan.

RP Yu, BY; Wei, YM (reprint author), Beijing Inst Technol, Ctr Energy & Environm Policy Res, Beijing, Peoples R China.; Yu, BY; Wei, YM (reprint author), Beijing Inst Technol, Sch Management & Econ, Beijing, Peoples R China.

EM yubiyang\_bj@bit.edu.cn; ymwei@263.net

FU programme 'Japan Society for the Promotion of Science (JSPS)

Postdoctoral Fellowship for Foreign Researchers'; China's National Key RD Program [2016YFA0602603]; National Natural Science Foundation of China [71603020, 71521002, 71642004]; National Bureau of Statistics China; Joint Development Program of Beijing Municipal Commission of Education

FX This work was supported by the programme 'Japan Society for the



Promotion of Science (JSPS) Postdoctoral Fellowship for Foreign Researchers'. The authors acknowledge financial support received through China's National Key R&D Program (2016YFA0602603), and the National Natural Science Foundation of China (no. 71603020, no. 71521002 and no. 71642004). We also acknowledge the support of the National Bureau of Statistics China in sharing the 2008 time-use data with us, and acknowledge the support of the Joint Development Program of Beijing Municipal Commission of Education. We thank B. van Ruijven for his kind help in providing information for the Population- Environment-Technology (PET) model.

- CR Allcott H, 2010, SCIENCE, V327, P1204, DOI 10.1126/science.1180775  
 Baral R, 2011, ECON LETT, V112, P138, DOI 10.1016/j.econlet.2011.03.005  
 BECKER GS, 1965, ECON J, V75, P493, DOI 10.2307/2228949  
 Bin S, 2005, ENER POLICY, V33, P197, DOI 10.1016/S0301-4215(03)00210-6  
 Brencic V, 2009, ECOL ECON, V68, P2859, DOI 10.1016/j.ecolecon.2009.06.005  
 [Anonymous], 2011, CHIN EL POW IND SAT  
 Clayton S, 2015, NAT CLIM CHANGE, V5, P640, DOI [10.1038/nclimate2622, 10.1038/NCLIMATE2622]  
 Cogoy M., 2004, Structural Change and Economic Dynamics, V15, P165, DOI 10.1016/S0954-349X(03)00025-0  
 Cohen JE, 2003, SCIENCE, V302, P1172, DOI 10.1126/science.1088665  
 CONTESTABILE M, 2014, NAT CLIM CHANGE, V4, P420  
 Dai Y., 2013, POTENTIAL COST STUDY  
 Dalton M, 2008, ENER ECON, V30, P642, DOI 10.1016/j.eneco.2006.07.002  
 Davis SJ, 2010, P NATL ACAD SCI USA, V107, P5687, DOI 10.1073/pnas.0906974107  
 Dietz T, 2009, P NATL ACAD SCI USA, V106, P18452, DOI 10.1073/pnas.0908738106  
 Druckman A, 2012, ECOL ECON, V84, P153, DOI 10.1016/j.ecolecon.2012.09.008  
 Ellegard K, 2011, APPL ENER, V88, P1920, DOI 10.1016/j.apenergy.2010.11.019  
 Fridley D., 2012, LBNL4866E  
 Fu CH, 2014, ENERGY RES SOC SCI, V2, P1, DOI 10.1016/j.erss.2014.04.010  
 Gomi K, 2010, ENER POLICY, V38, P4783, DOI 10.1016/j.enpol.2009.07.026  
 Gortz M., 2006, THESIS  
 Gruebler A., 1998, TECHNOLOGY GLOBAL CH  
 Hamermesh DS, 2007, AM J AGR ECON, V89, P852, DOI 10.1111/j.1467-8276.2007.01012.x  
 Hamza N, 2011, ENER POLICY, V39, P782, DOI 10.1016/j.enpol.2010.10.052  
 Harper S, 2014, SCIENCE, V346, P587, DOI 10.1126/science.1254405  
 Jalas M, 2005, J IND ECOL, V9, P129, DOI 10.1162/1088198054084644  
 Jalas M, 2002, ECOL ECON, V41, P109, DOI 10.1016/S0921-8009(02)00018-6  
 Jalas M, 2015, ECOL ECON, V113, P51, DOI 10.1016/j.ecolecon.2015.02.016  
 Jiang LW, 2011, POPUL RES POLICY REV, V30, P287, DOI 10.1007/s11113-010-9189-7  
 Kainuma M., 2011, CLIMATE POLICY ASSES  
 Lee R, 2011, POPULATION AGING AND THE GENERATIONAL ECONOMY: A GLOBAL PERSPECTIVE, P1  
 Lee R., 2014, EC POL S FED RES BAN  
 Liddle B, 2010, POPUL ENVIRON, V31, P317, DOI 10.1007/s11111-010-0101-5  
 Liu Z, 2016, NAT CLIM CHANGE, V6, P201, DOI [10.1038/nclimate2800, 10.1038/NCLIMATE2800]  
 Liu Z, 2015, NATURE, V524, P335, DOI 10.1038/nature14677  
 MacKellar FL, 1995, POPUL DEV REV, V21, P849, DOI 10.2307/2137777  
 Melnikov NB, 2012, ENER ECON, V34, P1475, DOI 10.1016/j.eneco.2012.06.010  
 Menz T, 2012, ENER ECON, V34, P842, DOI 10.1016/j.eneco.2011.07.016  
 Nassen J, 2015, ENVIRON PLANN C, V33, P726, DOI 10.1068/c12239  
 National Bureau of Statistics of China, 2010, CHIN EN STAT YB 2010  
 National Bureau of Statistics China 2008, 2009, 2008 CHIN TIM US SUR  
 National Bureau of Statistics China, 2009, CHIN STAT YB 2009  
 Neuwirth N., 2007, 59 AUSTR I FAM STUD  
 O'Neill BC, 2015, P NATL ACAD SCI USA, V112, pE506, DOI 10.1073/pnas.1421989112  
 O'Neill BC, 2012, ENER ECON, V34, pS339, DOI 10.1016/j.eneco.2012.04.004  
 O'Neill BC, 2010, P NATL ACAD SCI USA, V107, P17521, DOI 10.1073/pnas.1004581107  
 O'Neill BC, 2002, POPUL DEV REV, V28, P53

Pachauri S, 2004, ENER POLICY, V32, P1723, DOI 10.1016/S0301-4215(03)00162-9  
 [Anonymous], 2012, SICH 12 5 YEAR POP D  
 Rosa EA, 2012, NAT CLIM CHANGE, V2, P581, DOI 10.1038/NCLIMATE1506  
 CECA CSP, 2014, SACTC20 CECA CSP  
 Shimada K, 2007, ENER POLICY, V35, P4688, DOI 10.1016/j.enpol.2007.03.025  
 UN DESA, 2013, WORLD POP PROSP 2012  
 Wang DG, 2011, J TRANSP GEOGR, V19, P1173, DOI 10.1016/j.jtrangeo.2011.03.008  
 Yang YY, 2015, ENVIRON IMPACT ASSES, V55, P45, DOI 10.1016/j.eiar.2015.06.007  
 Zeng Y., 2013, HOUSEHOLD LIVING ARR  
 Zhang L., 2013, EUROHEAT POWER, V10, P12, DOI DOI 10.1007/S11432-012-4651-2  
 [Anonymous], 2016, BBC NEWS ASIA 0215

NR 57

TC 1

Z9 1

U1 14

U2 14

PU NATURE PUBLISHING GROUP

PI LONDON

PA MACMILLAN BUILDING, 4 CRINAN ST, LONDON N1 9XW, ENGLAND

SN 2058-7546

J9 NAT ENERGY

JI Nat. Energy

PD FEB

PY 2018

VL 3

IS 2

BP 109

EP 118

DI 10.1038/s41560-017-0053-4

PG 10

WC Energy & Fuels; Materials Science, Multidisciplinary

SC Energy & Fuels; Materials Science

GA FX2CQ

UT WOS:000425866500011

DA 2018-05-03

ER

PT J

AU Nie, HG

Kemp, R

Xu, JH

Vasseur, V

Fan, Y

AF Nie, Hong-guang

Kemp, Rene

Xu, Jin-hua

Vasseur, Veronique

Fan, Ying

TI Drivers of urban and rural residential energy consumption in China from  
 the perspectives of climate and economic effects

SO JOURNAL OF CLEANER PRODUCTION

LA English

DT Article

DE Residential energy consumption (REC); Index decomposition analysis;

Urban versus rural areas; Climate effect; China

ID INDEX DECOMPOSITION ANALYSIS; NATURAL-GAS CONSUMPTION; CO2 EMISSIONS;

ELECTRICITY CONSUMPTION; REGRESSION-MODELS; SECTOR; URBANIZATION;

EFFICIENCY; BUILDINGS; REDUCTION

AB In this study, we investigate the driving forces behind the changes in residential energy consumption (REC) in China's urban and rural areas over the 2001-2012 period. Based on the logarithmic mean Divisia index method, the REC changes are decomposed into seven driving forces, which are climate change, energy price, energy expenditure mix, energy cost share (in total expenditure), expenditure share (in income), per capita income and population effects. According to the results, climate effect due to increasing days with abnormal temperature, energy cost share effect characterized by more expenditure to be paid for energy use, income effect describing constant income growth in the residential sector definitely increase REC in both urban and rural areas. In contrast, energy prices and energy expenditure mix effects negatively contribute to the REC increase, respectively because of the increase in energy prices and the transition from the low-priced energy to high-priced energy. Expenditure share and population effects play opposite roles in urban and rural areas, and the reasons and implications are analysed in depth. (C) 2017 Elsevier Ltd. All rights reserved.

C1 [Nie, Hong-guang] Changchun Univ Sci & Technol, Sch Econ & Management, Changchun, Jilin, Peoples R China.

[Nie, Hong-guang; Xu, Jin-hua] Chinese Acad Sci, Inst Sci & Dev, Ctr Energy & Environm Policy Res, Beijing, Peoples R China.

[Kemp, Rene; Vasseur, Veronique] Maastricht Univ, Int Ctr Integrated Assessment & Sustainable Dev I, Maastricht, Netherlands.

[Kemp, Rene] Maastricht Univ, UNU MERIT, Maastricht, Netherlands.

[Fan, Ying] Beihang Univ, Sch Econ & Management, Beijing, Peoples R China.

RP Fan, Y (reprint author), Beihang Univ, Sch Econ & Management, Beijing, Peoples R China.

EM nhguang@126.com; r.kemp@maastrichtuniversity.nl; yfan1123@buaa.edu.cn

OI Nie, Hongguang/0000-0001-6080-7250

FU Chinese Academy of Sciences [GJHZ1513]; Dutch Research Council NOW

[467-14-023]; National Natural Sciences Foundation of China [71503026, 71210005, 71690245]

FX This research is supported by the External Cooperation Program of the Chinese Academy of Sciences (Grant No. GJHZ1513), Dutch Research Council NOW (Grant No. 467-14-023), the National Natural Sciences Foundation of China (Grant No.71503026, No.71210005 and No.71690245).

CR Achao C, 2009, ENERG POLICY, V37, P5208, DOI 10.1016/j.enpol.2009.07.043

Ang BW, 2015, ENERG POLICY, V86, P233, DOI 10.1016/j.enpol.2015.07.007

Ang BW, 2005, ENERG POLICY, V33, P867, DOI 10.1016/j.enpol.2003.10.010

Ang BW, 2004, ENERG POLICY, V32, P1131, DOI 10.1016/S0301-4215(03)00076-4

Ang BW, 2001, ENERGY, V26, P537, DOI 10.1016/S0360-5442(01)00022-6

APEREC, 2001, EN EFF IND STUD EN E

Bianco V, 2013, ENERG SOURCE PART B, V8, P86, DOI 10.1080/15567240903289549

Bianco V, 2014, ENERG CONVERS MANAGE, V87, P754, DOI 10.1016/j.enconman.2014.07.081

Bin S, 2005, ENERG POLICY, V33, P197, DOI 10.1016/S0301-4215(03)00210-6

Catalina T, 2008, ENERG BUILDINGS, V40, P1825, DOI 10.1016/j.enbuild.2008.04.001

Chung W, 2011, APPL ENERG, V88, P5180, DOI 10.1016/j.apenergy.2011.07.030

DESNBS, 2009, CHIN EN STAT YB

Department of Energy Statistics of National Bureau of Statistic of China (DESNBS) Department of General Affairs of National Energy Administration (DGANEA), 2008, CHINA ENERGY STAT YB

Department of Industry and Transport Statistics of National Bureau of Statistic of China(DITSNBS) Energy Bureau of National Development and Reform Commission of China(EBNDRC), 2003, CHIN EN STAT YB

Duchin F, 1998, STRUCTURAL EC MEASUR

Editorial Office of Price Yearbook of China (EOPY), 2002, PRIC YB CHIN

Fan JL, 2017, RENEW SUST ENERG REV, V75, P220, DOI 10.1016/j.rser.2016.10.066

Fumo N, 2015, RENEW SUST ENERG REV, V47, P332, DOI 10.1016/j.rser.2015.03.035

Gans W, 2013, ENERG ECON, V36, P729, DOI 10.1016/j.eneco.2012.11.022

Haas R, 1997, ENERG POLICY, V25, P789, DOI 10.1016/S0301-4215(97)00069-4

Hojjati B, 2012, ENERG POLICY, V48, P304, DOI 10.1016/j.enpol.2012.05.024

Hubacek K, 2012, ENERGIES, V5, P22, DOI 10.3390/en5010022

Li YM, 2015, J CLEAN PROD, V102, P103, DOI 10.1016/j.jclepro.2015.04.037

Liu ZM, 2015, ENERG CONVERS MANAGE, V98, P401, DOI 10.1016/j.enconman.2015.04.008

Mardookhy M, 2014, J CLEAN PROD, V85, P241, DOI 10.1016/j.jclepro.2013.09.025

Miao L, 2017, ECOL INDIC, V73, P29, DOI 10.1016/j.ecolind.2016.09.031

Min J, 2010, J IND ECOL, V14, P791, DOI 10.1111/j.1530-9290.2010.00279.x  
 NBS ( National Bureau of Statistics), 2013, CHIN STAT YB  
 Nie HG, 2014, APPL ENERG, V121, P10, DOI 10.1016/j.apenergy.2014.01.070  
 Raffio G., 2007, P EN SUST LONG BEACH  
 Rogan F, 2012, ENERG POLICY, V42, P19, DOI 10.1016/j.enpol.2011.10.059  
 Shen J, 2009, J ENVIRON MANAGE, V90, P3561, DOI 10.1016/j.jenvman.2009.06.010  
 Soldo B, 2014, ENERG BUILDINGS, V69, P498, DOI 10.1016/j.enbuild.2013.11.032  
 Wang QS, 2015, SUSTAINABILITY-BASEL, V7, P3919, DOI 10.3390/su7043919  
 Weber C, 2000, ENERG POLICY, V28, P549, DOI 10.1016/S0301-4215(00)00040-9  
 Xu JH, 2014, ENERG ECON, V46, P348, DOI 10.1016/j.eneco.2014.10.013  
 Xu XY, 2014, APPL ENERG, V113, P342, DOI 10.1016/j.apenergy.2013.07.052  
 Yi BW, 2016, J CLEAN PROD, V122, P87, DOI 10.1016/j.jclepro.2016.01.112  
 Yohanis YG, 2012, ENERG POLICY, V41, P654, DOI 10.1016/j.enpol.2011.11.028  
 Zha DL, 2010, ENERG POLICY, V38, P3377, DOI 10.1016/j.enpol.2010.02.011  
 Zhang M, 2016, RENEW SUST ENERG REV, V53, P330, DOI 10.1016/j.rser.2015.08.043  
 Zhang M, 2013, ENERGY, V52, P222, DOI 10.1016/j.energy.2013.01.039  
 Zhao XL, 2012, ENERG POLICY, V41, P644, DOI 10.1016/j.enpol.2011.11.027  
 Zhou N, 2010, ENERG POLICY, V38, P6439, DOI 10.1016/j.enpol.2009.08.015

NR 44

TC 1

Z9 1

U1 5

U2 5

PU ELSEVIER SCI LTD

PI OXFORD

PA THE BOULEVARD, LANGFORD LANE, KIDLINGTON, OXFORD OX5 1GB, OXON, ENGLAND

SN 0959-6526

EI 1879-1786

J9 J CLEAN PROD

J1 J. Clean Prod.

PD JAN 20

PY 2018

VL 172

BP 2954

EP 2963

DI 10.1016/j.jclepro.2017.11.117

PG 10

WC GREEN & SUSTAINABLE SCIENCE & TECHNOLOGY; Engineering, Environmental;  
 Environmental Sciences

SC Science & Technology - Other Topics; Engineering; Environmental Sciences  
 & Ecology

GA FT2UT

UT WOS:000423002200146

DA 2018-05-03

ER

PT J

AU Bourdeau, M

Guo, XF

Nefzaoui, E

AF Bourdeau, Mathieu

Guo, Xiaofeng

Nefzaoui, Elyes

TI Buildings energy consumption generation gap: A post-occupancy assessment  
 in a case study of three higher education buildings

SO ENERGY AND BUILDINGS

LA English

DT Article

DE Higher educational building; Heat and electric consumption; Positive energy building; Statistical analysis; Load curve

ID SCHOOL BUILDINGS; PERFORMANCE; SIMULATION; CAMPUS

AB The existing stock of institutional buildings constructed before current thermal regulations is known to be high energy-consuming. In several cases, they contribute to a large share in local authorities' expenses, especially for those dedicated to education and research. These high consumption levels are due in general to low thermal regulations requirements and to the diversity of occupants, occupancy profiles and used equipment. We hereby report on a comparative study of the energy consumption of three campus buildings covering more than 50,000 m<sup>2</sup> useful ground area and located in Paris region. Used data were collected during more than three years between 2014 and 2017 and at different time steps, from yearly down to a 10 min time step. Statistical analysis tools are used, to identify the main energy drivers and their relative weight in the overall energy consumption for instance. The impact of different thermal regulations is clearly assessed through a post-occupancy study. Together with equipment, occupancy is shown to be the main electric energy consumption driver. Introduced tools lay the ground for a non-intrusive method for large tertiary buildings' power demand curves decomposition and reconstruction. (C) 2017 Elsevier B.V. All rights reserved.

C1 [Bourdeau, Mathieu; Guo, Xiaofeng; Nefzaoui, Elyes] Univ Paris Est, ESIEE Paris, 2 Bd Blaise Pascal, F-93162 Noisy Le Grand, France.

[Bourdeau, Mathieu; Guo, Xiaofeng; Nefzaoui, Elyes] Efficacity, 14-20 Blvd Newton, F-77447 Marne La Vallee 2, France.

[Nefzaoui, Elyes] Univ Paris Est, Lab Esycom, Cite Descartes, F-77454 Marne La Vallee, France.

[Bourdeau, Mathieu] Shanghai Jiao Tong Univ, Sch Mech Engr, 800 Dongchuan Rd, Shanghai 200240, Peoples R China.

RP Nefzaoui, E (reprint author), Univ Paris Est, ESIEE Paris, 2 Bd Blaise Pascal, F-93162 Noisy Le Grand, France.

EM elyes.nefzaoui@esiee.fr

OI Nefzaoui, Elyes/0000-0002-7544-0188; Guo, Xiaofeng/0000-0001-5306-1219;

Bourdeau, Mathieu/0000-0002-2062-8642

CR AFNOR, 2012, 162472 NF EN AFNOR

AFNOR, 2012, 162471 NF EN AFNOR

Agdas D, 2015, SUSTAIN CITIES SOC, V17, P15, DOI 10.1016/j.scs.2015.03.001

Alajmi A, 2012, ENERGBUILDINGS, V47, P122, DOI 10.1016/j.enbuild.2011.11.033

Allab Y, 2017, ENERGBUILDINGS, V143, P202, DOI 10.1016/j.enbuild.2016.11.028

[Anonymous], 2006, 100 ASHRAE, P2006

Azar E, 2012, J COMPUT CIVIL ENG, V26, P506, DOI 10.1061/(ASCE)CP.1943-5487.0000158

Basu K, 2017, SUSTAIN ENERGY GRIDS, V9, P118, DOI 10.1016/j.segan.2016.12.006

Basu K, 2016, IEEE IND ELEC, P5137, DOI 10.1109/IECON.2016.7793294

Borgstein EH, 2016, ENERGBUILDINGS, V128, P734, DOI 10.1016/j.enbuild.2016.07.018

Braun MR, 2014, APPL ENERGBUILDINGS, V130, P305, DOI 10.1016/j.apenergy.2014.05.062

BSI, 2008, 156032008 BS EN BSI

Butala V, 1999, ENERGBUILDINGS, V29, P241, DOI 10.1016/S0378-7788(98)00062-0

Chicheportiche R., 2013, PETROLE GAZ INF, P60

Cleveland RC, 1990, J OFF STAT, V6, P3

Collectif CSTB, 2012, REGL THERM GUID REG

de Paris Ville, 2015, RENOVATION ENERGETIQ

Deshko VI, 2013, ENERGBUILDINGS, V66, P582, DOI 10.1016/j.enbuild.2013.07.070

Duplex J., 2013, BETTER KNOWLEDGE ELE

European commission, 2014, REP COMM BENCHM SMAR

HART GW, 1992, P IEEE, V80, P1870, DOI 10.1109/5.192069

Hossain M.A., 2014, 2014 IEEE 40 PHOT SP

Iowa Environmental Mesonet, 2017, ASOS AWOS METAR DAT

Kendall M, 1983, ADV THEORY STAT, V3

Lee W.K., 2004, EXPLORATION LOAD SIG

Masoso OT, 2010, ENERGBUILDINGS, V42, P173, DOI 10.1016/j.enbuild.2009.08.009

Pereira LD, 2014, RENEW SUST ENERGBUILDINGS, V40, P911, DOI 10.1016/j.rser.2014.08.010

R Core Team, 2014, R LANG ENV STAT COMP

Thewes A, 2014, ENERGBUILDINGS, V68, P460, DOI 10.1016/j.enbuild.2013.10.002

Vesterberg J, 2014, ENERGBUILDINGS, V81, P430, DOI 10.1016/j.enbuild.2014.06.035

Webber CA, 2006, ENERGY, V31, P2823, DOI 10.1016/j.energy.2005.11.007  
 Yan D, 2017, ENERGBUILDINGS, V156, P258, DOI 10.1016/j.enbuild.2017.09.084  
 Yang JJ, 2016, ENERGBUILDINGS, V121, P344, DOI 10.1016/j.enbuild.2015.12.019  
 Yang Z, 2014, ENERGBUILDINGS, V78, P113, DOI 10.1016/j.enbuild.2014.04.002  
 Zeifman M, 2011, IEEE T CONSUM ELECTR, V57, P76, DOI 10.1109/TCE.2011.5735484

NR 35

TC 1

Z9 1

U1 3

U2 3

PU ELSEVIER SCIENCE SA

PI LAUSANNE

PA PO BOX 564, 1001 LAUSANNE, SWITZERLAND

SN 0378-7788

EI 1872-6178

J9 ENERGBUILDINGS

J1 Energy Build.

PD JAN 15

PY 2018

VL 159

BP 600

EP 611

DI 10.1016/j.enbuild.2017.11.062

PG 12

WC Construction & Building Technology; Energy & Fuels; Engineering, Civil

SC Construction & Building Technology; Energy & Fuels; Engineering

GA FT2XB

UT WOS:000423008200046

DA 2018-05-03

ER

PT J

AU Heidari, M

Majcen, D

van der Lans, N

Floret, I

Patel, MK

AF Heidari, Mahbod

Majcen, Dasa

van der Lans, Noline

Floret, Idelette

Patel, Martin K.

TI Analysis of the energy efficiency potential of household lighting in

Switzerland using a stock model

SO ENERGY AND BUILDINGS

LA English

DT Article

DE Energy efficiency; Lighting; Household; Stock model; LED; Bottom-up  
 modelling; Techno-economic analysis

ID CHINA

AB Lighting, a main focus of Swiss energy efficiency policy, is a substantial consumer of energy in the residential sector in Switzerland, requiring 4.1 PJ electricity in 2015 or 6.4% of the sector's total electricity demand. Currently, incandescent bulbs (sales were prohibited in 2014) and halogen bulbs (to be banned in 2018) jointly represent nearly 60% of the installed lighting capacity in Swiss households. In the past few years, the price of light emitting diodes (LEDs) dropped dramatically, offering largely unexploited opportunities for energy efficiency improvement. To assess the energy efficiency potential in household lighting, a dynamic model is developed that accounts for the change of the lighting stock per technology over time. (C) 2017 Elsevier B.V. All rights reserved.

- C1 [Heidari, Mahbod; Majcen, Dasa; van der Lans, Nicoline; Floret, Idelette; Patel, Martin K.] Univ Geneva, Chair Energy Efficiency, Geneva, Switzerland.
- RP Heidari, M (reprint author), Univ Geneva, Chair Energy Efficiency, Geneva, Switzerland.  
EM mahbod.heidari@unige.ch
- FU Swiss Commission for Technology and Innovation (CTI)
- FX This research is part of the activities of SCCER CREST, which is financially supported by the Swiss Commission for Technology and Innovation (CTI). We are grateful for the funding received for conducting this research.
- CR Azevedo IL, 2013, ENVIRON SCI TECHNOL, V47, P2502, DOI 10.1021/es303688k  
Battig R., 2009, SWISS GREENHOUSE GAS  
Bebbington M., 2008, THEORY APPL, P97  
Bertoldi P, 2008, INT J GREEN ENERGY, V5, P15, DOI 10.1080/15435070701839397  
Blok K., 2016, INTRO ENERGY ANAL  
Blok K., 2007, INTRO ENERGY ANAL  
Bucher M., 2011, 8 INT C EUR EN MARK  
[Anonymous], 2015, BULBSH PROD INF  
Bertholet J., 2015, P ECEEE 2015 SUMM ST, P2015  
Cabrera J. D., 2015, P 8 INT C EN EFF DOM  
Dasgupta R, 2014, J ENV STAT, V6, P1  
Elshkaki A, 2005, ENERGY, V30, P1353, DOI 10.1016/j.energy.2004.02.019  
[Anonymous], 2014, IMP ASS ACC COMM EUR  
Fan JJ, 2012, IEEE T DEVICE MAT RE, V12, P470, DOI 10.1109/TDMR.2012.2190415  
Fawcett T., 2000, LOWER CARBON FUTURES  
Flatt M., 2010, SEGMENTBERICHTERSTAT  
Global Energy Assessment (GEA), 2012, GLOBAL ENERGY ASSESS  
Gomis G. M., 2015, COUNTR LIGHT ASS  
Greening L., 2016, ENER POLICY, V28, P389  
Grieder T., 2008, NEUE ANSATZE VERBRAU  
Hu J., 2015, TECHNICAL REPORT  
Hwang R.J., 1994, TECH REP  
[Anonymous], 2015, IKEA LIGHT PROD INF  
Kemmler A., 2016, ANAL SCHWEIZERISCHEN  
Kirchner A, 2012, ENERGIEPERSPEKTIVEN  
Kleijn R, 2000, ECOL ECON, V32, P241, DOI 10.1016/S0921-8009(99)00090-7  
Koomey J. G., 1991, POTENTIAL ELECTRICIT  
Lin CH, 2008, RESOUR CONSERV RECY, V52, P1322, DOI 10.1016/j.resconrec.2008.07.015  
Liu XB, 2006, WASTE MANAGE RES, V24, P92, DOI 10.1177/0734242X06062499  
[Anonymous], 2012, LIGHT WAY PERSP GLOB  
Melo MT, 1999, RESOUR CONSERV RECY, V26, P91, DOI 10.1016/S0921-3449(98)00077-9  
Meyers S., 2005, REALIZED PROSPECTIVE  
Mills B, 2014, ENER ECON, V46, P151, DOI 10.1016/j.eneco.2014.08.022  
Mohd A., 2010, MOTOR SYSTEMS EFFICI  
Mueller E., 2009, R 09 WORLD C DAV SWI  
MUTH R, 1973, PAPERS REGIONAL SCI, V30, P141  
Nachtrieb R., 2013, 31 INT C SYST DYN SO  
[Anonymous], 2007, NAT PHOTONICS, V1, P23  
[Anonymous], 2015, IEA WORLD ENERGY OUT  
Page M., 2012, LIBERALISATION COMPE  
[Anonymous], 2015, PROKILOWATT APPL OFF  
Ramsey FP, 1928, ECON J, V38, P543, DOI 10.2307/2224098  
Schleich J, 2016, ENER POLICY, V97, P321, DOI 10.1016/j.enpol.2016.07.044  
Schleich J, 2014, ENER POLICY, V72, P35, DOI 10.1016/j.enpol.2014.04.028  
[Anonymous], 2015, SFSO CONSTRUCTION LO  
Spezia J., 2011, J IND TECHNOL, V27  
Steinbach J., 2015, DISCOUNT RATES ENER  
Stern N., 2007, EC CLIMATE CHANGE ST  
Streicher-Porte M, 2005, ENVIRON IMPACT ASSES, V25, P472, DOI 10.1016/j.eiar.2005.04.004

[Anonymous], 2017, TOPT CH BEST PROD  
 U.S. Energy Information Administration, 2014, ANN EN OUTL 2014 EAR  
 [Anonymous], 2008, UND COST EFF EN EFF  
 van der Voet E, 2002, ECOL ECON, V41, P223, DOI 10.1016/S0921-8009(02)00028-9  
 Walk W., 2004, EL GOES GREEN 2004 P  
 Wang F, 2013, WASTE MANAGE, V33, P2397, DOI 10.1016/j.wasman.2013.07.005  
 Worrell E, 2003, ENERGY, V28, P1081, DOI 10.1016/S0360-5442(03)00091-4  
 Young D, 2008, ENER POLICY, V36, P34, DOI 10.1016/j.enpol.2007.09.011  
 Zhang L, 2011, RESOUR CONSERV RECY, V55, P1087, DOI 10.1016/j.resconrec.2011.06.003  
 Zhang YJ, 2017, APPL ENERG, V196, P132, DOI 10.1016/j.apenergy.2016.12.087  
 Zhuang J., 2007, THEORY PRACTICE CHOI  
 Zuberi M., 2016, J CLEAN PROD  
 [Anonymous], 2012, EFFIZIENZ ELEKTRIFIZ  
 [Anonymous], 2016, ORDONNANCE ENERGIE 7  
 [Anonymous], 2014, TOP QUALITY ENERGY E  
 [Anonymous], 2016, SWITZERLAND ENERGY S  
 NR 65  
 TC 1  
 Z9 1  
 U1 1  
 U2 1  
 PU ELSEVIER SCIENCE SA  
 PI LAUSANNE  
 PA PO BOX 564, 1001 LAUSANNE, SWITZERLAND  
 SN 0378-7788  
 EI 1872-6178  
 J9 ENERGBUILDINGS  
 JI Energy Build.  
 PD JAN 1  
 PY 2018  
 VL 158  
 BP 536  
 EP 548  
 DI 10.1016/j.enbuild.2017.08.091  
 PG 13  
 WC Construction & Building Technology; Energy & Fuels; Engineering, Civil  
 SC Construction & Building Technology; Energy & Fuels; Engineering  
 GA FU1VC  
 UT WOS:000423636600046  
 DA 2018-05-03  
 ER  
  
 PT J  
 AU Andersen, FM  
     Baldini, M  
     Hansen, LG  
     Jensen, CL  
 AF Andersen, Frits Moller  
     Baldini, Mattia  
     Hansen, Lars Garn  
     Jensen, Carsten Lyngge  
 TI Households' hourly electricity consumption and peak demand in Denmark  
 SO APPLIED ENERGY  
 LA English  
 DT Article  
 DE Hourly electricity demand; Household demand flexibility; Household  
     appliances; Load forecasting  
 ID LOAD PROFILES; RESIDENTIAL DEMAND; FIELD EXPERIMENT; SIDE MANAGEMENT;



## ENERGY-STORAGE; HEAT-PUMPS; FLEXIBILITY; POWER; SYSTEM; INFORMATION

AB The electrification of residential energy demand for heating and transportation is expected to increase peak load and require additional generation and transmission capacities. Electrification also provides an opportunity to increase demand response. With a focus on household electricity consumption, we analyse the contribution of appliances and new services, such as individual heat pumps and electric vehicles, to peak consumption and the need for demand response incentives to reduce the peak.

Initially, the paper presents a new model that represents the hourly electricity consumption profile of households in Denmark. The model considers hourly consumption profiles for different household appliances and their contribution to annual household electricity consumption. When applying the model to an official scenario for annual electricity consumption, assuming non-flexible consumption due to a considerable introduction of electric vehicles and individual heat pumps, household consumption is expected to increase considerably, especially peak hour consumption is expected to increase.

Next the paper presents results from a new experiment where household customers are given economic and/or environmental incentives to shift consumption to or away from specified hours. The experiment focuses on the present classic consumption and shows that household customers do react to incentives, but today the flexibility of the classic consumption is limited. Considering electric vehicles and individual heat pumps, for an individual household, the consumption of each of these technologies roughly doubles the household's consumption and considerably increases their potential for flexibility. Thus, in order to introduce incentives for demand flexibility, while considering reducing peak consumption, policy makers should initially focus on households that have a heat pump and/or an electric vehicle.

C1 [Andersen, Frits Moller; Baldini, Mattia] DTU Management Engn, Prod Torvet, DK-2800 Lyngby, Denmark.

[Hansen, Lars Garn; Jensen, Carsten Lyngje] Univ Copenhagen, Inst Food & Resource Econ, Rolighedsvej 23, DK-1958 Frederiksberg C, Denmark.

RP Andersen, FM (reprint author), DTU Management Engn, Prod Torvet, DK-2800 Lyngby, Denmark.

EM fman@dtu.dk; mbal@dtu.dk; lgh@ifro.ku.dk; clj@ifro.ku.dk

OI Baldini, Mattia/0000-0002-5181-7083; Moller Andersen,

Frits/0000-0003-2887-428X; Jensen, Carsten Lyngje/0000-0002-9609-4982

FU Innovation Fund Denmark

FX This study is part of the INCAP-project funded by Innovation Fund Denmark:

[http://ifro.ku.dk/english/research/projects/projects\\_environment/incap/](http://ifro.ku.dk/english/research/projects/projects_environment/incap/).

CR Andersen FM, 2014, APPL ENERG, V135, P523, DOI 10.1016/j.apenergy.2014.08.075

Andersen FM, 2013, ENER CONVERS MANAGE, V68, P244, DOI 10.1016/j.enconman.2013.01.018

Andersen LM, 2017, WORK PAP U COP UNPUB

Arias MB, 2017, APPL ENERG, V195, P738, DOI 10.1016/j.apenergy.2017.02.021

Baeten B, 2017, APPL ENERG, V195, P184, DOI 10.1016/j.apenergy.2017.03.055

Blarke MB, 2012, APPL ENERG, V91, P349, DOI 10.1016/j.apenergy.2011.09.038

D'hulst R, 2015, APPL ENERG, V155, P79, DOI 10.1016/j.apenergy.2015.05.101

Darby SJ, 2012, ENER POLICY, V49, P759, DOI 10.1016/j.enpol.2012.07.026

DongEnergy DanskEnergi and Energinet. dk, 2013, VARM DANM UDV OMST O

Dupont B, 2014, APPL ENERG, V122, P1, DOI 10.1016/j.apenergy.2014.02.022

Energinet dk, 2016, EN DKS AN 2016

Finn P, 2013, APPL ENERG, V101, P678, DOI 10.1016/j.apenergy.2012.07.004

Ginden B, ANAL MONITORING CAMP

Gleerup M, 2012, ENERGY J, V33, P187

Gottwalt S, 2016, ENER POLICY, V179, P790

Greene W. H., 1997, ECONOMETRIC ANAL

Jacobsen HK, 2015, DTU INT ENERGY REPOR

Jensen CL, 2012, ENER J, V33, P187, DOI 10.5547/01956574.33.4.9

Juul N., 2015, INT J SUSTAIN ENERGY, V7, P67

Klein K, 2017, APPL ENERG, V203, P917, DOI 10.1016/j.apenergy.2017.06.073

Kristoffersen TK, 2011, APPL ENERG, V88, P1940, DOI 10.1016/j.apenergy.2010.12.015

Kwon PS, 2014, APPL ENERG, V134, P309, DOI 10.1016/j.apenergy.2014.08.044

Lakshmanan V, 2016, ENERGY, V94, P705, DOI 10.1016/j.energy.2015.11.050

Love J, 2017, APPL ENERG, V204, P332, DOI 10.1016/j.apenergy.2017.07.026

Majidpour M, 2016, APPL ENERG, V163, P134, DOI 10.1016/j.apenergy.2015.10.184

Mansouri I, 1996, APPL ENERG, V54, P211, DOI 10.1016/0306-2619(96)00001-3

Matsukawa I, 2004, ENERGY J, V25, P1  
 Moller NF, 2015, INT J SUSTAIN ENERGY, V7, P5  
 Murray DM, 2016, APPL ENERG, V171, P231, DOI 10.1016/j.apenergy.2016.03.038  
 Nielsen MG, 2016, APPL ENERG, V167, P189, DOI 10.1016/j.apenergy.2015.08.115  
 Nolan S, 2017, APPL ENERG, V192, P71, DOI 10.1016/j.apenergy.2017.01.016  
 Ostergaard PA, 2015, INT J SUSTAIN ENERGY, V7, P95  
 Paatero JV, 2006, INT J ENERG RES, V30, P273, DOI 10.1002/er.1136  
 Paterakis NG, 2016, APPL ENERG, V173, P111, DOI 10.1016/j.apenergy.2016.04.024  
 Patteeuw D, 2016, APPL ENERG, V167, P80, DOI 10.1016/j.apenergy.2016.01.036  
 Riddell AG, 1996, APPL ENERG, V54, P199, DOI 10.1016/0306-2619(95)00075-5  
 Sadeghianpourhamami N, 2016, APPL ENERG, V179, P790, DOI 10.1016/j.apenergy.2016.07.012  
 Sandels C, 2014, APPL ENERG, V131, P267, DOI 10.1016/j.apenergy.2014.06.048  
 Schuller A, 2015, APPL ENERG, V151, P335, DOI 10.1016/j.apenergy.2015.04.004  
 SEXTON RJ, 1989, LAND ECON, V65, P272, DOI 10.2307/3146671  
 Sidler O, 2002, 2002 ACEEE SUMMER ST, P281  
 Spiliotis K, 2016, APPL ENERG, V182, P613, DOI 10.1016/j.apenergy.2016.08.145  
 Strbac G, 2017, IEEE POWER ENERGY M, V15, P32, DOI 10.1109/MPE.2017.2708858  
 [Anonymous], 2006, TECHNICAL REPORT  
 Widen J, 2010, APPL ENERG, V87, P1880, DOI 10.1016/j.apenergy.2009.11.006  
 Widen J, 2009, ENERG BUILDINGS, V41, P753, DOI 10.1016/j.enbuild.2009.02.013  
 Zehir MA, 2012, ENERG CONVERS MANAGE, V64, P238, DOI 10.1016/j.enconman.2012.05.012  
 Zimmermann JP, 2009, CONTRACT, V17, P5

NR 48

TC 1

Z9 1

U1 11

U2 11

PU ELSEVIER SCI LTD

PI OXFORD

PA THE BOULEVARD, LANGFORD LANE, KIDLINGTON, OXFORD OX5 1GB, OXON, ENGLAND

SN 0306-2619

EI 1872-9118

J9 APPL ENERG

J1 Appl. Energy

PD DEC 15

PY 2017

VL 208

BP 607

EP 619

DI 10.1016/j.apenergy.2017.09.094

PG 13

WC Energy & Fuels; Engineering, Chemical

SC Energy & Fuels; Engineering

GA FN8UG

UT WOS:000416300400048

DA 2018-05-03

ER

PT J

AU Yildiz, B

Bilbao, JI

Dore, J

Sproul, AB

AF Yildiz, B.

Bilbao, J. I.

Dore, J.

Sproul, A. B.

TI Recent advances in the analysis of residential electricity consumption

and applications of smart meter data

SO APPLIED ENERGY

LA English

DT Review

DE Smart grids; Home energy management system; Forecasting; Clustering; Optimization; Residential electricity load profile

ID DEMAND-SIDE MANAGEMENT; BUILDING ENERGY-CONSUMPTION; OF-THE-ART; NEURAL-NETWORKS; SELF-CONSUMPTION; REGRESSION-ANALYSIS; CONDITIONAL DEMAND; HOUSEHOLD-LEVEL; LOAD PROFILES; PREDICTION

AB The emergence of smart grid technologies and applications has meant there is increasing interest in utilising smart meters. Smart meter penetration has significantly increased over the last decade and they are becoming more widespread globally. Companies such as Google, Nest, Intel, General Electric and Amazon are amongst those companies which have been developing end use applications such as home and battery energy management systems which leverage smart meter data. In addition, utilities and networks are becoming more aware of the potential benefits of using-household smart meter data in demand side management strategies such as energy efficiency and demand response. Motivated by this fact, the amount of research in this area has grown considerably in recent years. This paper reviews the most recent methods and techniques for using smart meter data such as forecasting, clustering, classification and optimization. The study covers various applications such as Home and Battery Energy Management Systems and demand response strategies enabled by the analysis of smart meter data. From a comprehensive review of the literature, it was observed that there are remarkable discrepancies between the studies, which make in-depth comparison and analysis challenging. Data analysis and reporting guidelines are suggested for studies which use smart meter data. These guidelines could provide a consistent and common framework which could enhance future research.

C1 [Yildiz, B.; Bilbao, J. I.; Sproul, A. B.] Univ New South Wales, Sch Photovolta & Renewable Energy Engr, Sydney, NSW 2052, Australia.

[Dore, J.] Solar Analyt, Redfern, NSW, Australia.

RP Sproul, AB (reprint author), Univ New South Wales, Sch Photovolta & Renewable Energy Engr, Sydney, NSW 2052, Australia.

EM a.sproul@unsw.edu.au

FU CRC for Low Carbon Living Ltd. - Cooperative Research Centre program, an Australian Government initiative; Cooperative Research Centre for Low Carbon Living Ltd.; Research Training Program of the Australian Government

FX This research was funded by the CRC for Low Carbon Living Ltd. supported by the Cooperative Research Centre program, an Australian Government initiative. One of the authors (B. Yildiz) acknowledges scholarship funding provided by the Cooperative Research Centre for Low Carbon Living Ltd., as well as a scholarship from the Research Training Program of the Australian Government and the ongoing support of Solar Analytics.

CR Abdulla K, 2016, J ENERGY STORAGE, V8, P51, DOI 10.1016/j.est.2016.09.005

Abreu JM, 2012, ENER BUILDINGS, V49, P479, DOI 10.1016/j.enbuild.2012.02.044

Adika CO, 2014, IEEE T SMART GRID, V5, P673, DOI 10.1109/TSG.2013.2271427

Ahmad AS, 2014, RENEW SUST ENER REV, V33, P102, DOI 10.1016/j.rser.2014.01.069

Ahmed KM, 2015, IEEE GREEN ENERGY TE

Aigner DJ, 1984, ENERGY J, V5, P81, DOI DOI 10.5547/ISSN0195-6574-EJ-V015-N03-6

Antonanzas J, 2016, SOL ENERGY, V136, P78, DOI 10.1016/j.solener.2016.06.069

Arghira N, 2012, ENERGY, V48, P128, DOI 10.1016/j.energy.2012.04.010

Armel KC, 2013, ENER POLICY, V52, P213, DOI 10.1016/j.enpol.2012.08.062

Attia HA, 2010, 14 INT MIDDL E POW S, P953

Aydinalp M, 2004, APPL ENER, V79, P159, DOI 10.1016/j.apenergy.2003.12.006

Aydinalp M, 2002, APPL ENER, V71, P87, DOI 10.1016/S0306-2619(01)00049-6

Aydinalp-Koksall M, 2008, APPL ENER, V85, P271, DOI 10.1016/j.apenergy.2006.09.012

Barbato A., 2011, 2011 IEEE Second International Conference on Smart Grid Communications (SmartGridComm 2011), P404, DOI 10.1109/SmartGridComm.2011.6102356

Bartels R., 1992, Utilities Policies, V2, P71, DOI 10.1016/0957-1787(92)90055-N

Basu K, 2013, ENER BUILDINGS, V67, P668, DOI 10.1016/j.enbuild.2013.02.008

Beale MH, 2015, NEURAL NETWORK TOOLB, P2

- Beaudin M, 2012, INNOV SMART GRID, P1
- Beaudin M, 2015, RENEW SUST ENERG REV, V45, P318, DOI 10.1016/j.rser.2015.01.046
- Beaudin M, 2014, IEEE T SMART GRID, V5, P1712, DOI 10.1109/TSG.2014.2310395
- Beck T, 2016, APPL ENERG, V173, P331, DOI 10.1016/j.apenergy.2016.04.050
- Biswas MAR, 2016, ENERGY, V117, P84, DOI 10.1016/j.energy.2016.10.066
- Brooks RA, 1997, SECOND INTERNATIONAL CONFERENCE ON COGNITIVE TECHNOLOGY, PROCEEDINGS, P271, DOI 10.1109/CT.1997.617707
- Cao SL, 2014, APPL ENERG, V128, P192, DOI 10.1016/j.apenergy.2014.04.075
- Capasso A, 1994, IEEE T POWER DELIV, V9
- CER smart metering project, 2012, CER SMART METERING P
- Chaouch M, 2014, IEEE T SMART GRID, V5, P411, DOI 10.1109/TSG.2013.2277171
- Chen D, 2015, IEEE T SMART GRID, V6, P2426, DOI 10.1109/TSG.2015.2402224
- Chicco G, 2004, IEEE T POWER SYST, V19, P1232, DOI 10.1109/TPWRS.2004.826810
- Chicco G, 2001, IEEE PORT POW TECH P, V2, P217
- Chicco G., 2006, IEEE T POWER SYST, V21, P1
- Chicco G, 2012, ENERGY, V42, P68, DOI 10.1016/j.energy.2011.12.031
- Costa N, 2016, ENERGBUILDINGS, V110, P294, DOI 10.1016/j.enbuild.2015.11.015
- Da Silva PG, 2014, IEEE T SMART GRID, V5, P402, DOI 10.1109/TSG.2013.2278868
- Das SK, 2002, IEEE WIREL COMMUN, V9, P77, DOI 10.1109/MWC.2002.1160085
- Denholm P, 2011, ENERGPOLICY, V39, P1817, DOI 10.1016/j.enpol.2011.01.019
- Di Giorgio A, 2014, APPL ENERG, V128, P119, DOI 10.1016/j.apenergy.2014.04.032
- Diez DM, 2015, OPEN INTRO STAT
- Dong B, 2015, ENERGY BUILD
- Edwards RE, 2012, ENERGBUILDINGS, V49, P591, DOI 10.1016/j.enbuild.2012.03.010
- Esther BP, 2016, RENEW SUST ENERG REV, V59, P342, DOI 10.1016/j.rser.2015.12.282
- Fan H, 2015, ENERGBUILDINGS, V105, P9, DOI 10.1016/j.enbuild.2015.07.030
- Farahbakhsh H, 1998, INT J ENERGRES, V22, P1133, DOI 10.1002/(SICI)1099-114X(19981025)22:13<1133::AID-ER434>3.0.CO;2-E
- FIEBIG DG, 1991, J ECONOMETRICS, V50, P297, DOI 10.1016/0304-4076(91)90023-7
- Figueiredo V, 2005, IEEE T POWER SYST, V20, P596, DOI 10.1109/TPWRS.2005.846234
- Finkel A., 2016, INDEPENDENT REV FUTU
- Fouquier A, 2013, RENEW SUST ENERG REV, V23, P272, DOI 10.1016/j.rser.2013.03.004
- Fumo N, 2015, RENEW SUST ENERG REV, V47, P332, DOI 10.1016/j.rser.2015.03.035
- Georgia Tech, AW HOM RES IN
- Gajowniczek K, 2014, PROCEDIA COMPUT SCI, V35, P589, DOI 10.1016/j.procs.2014.08.140
- Gelazanskas L, 2014, SUSTAIN CITIES SOC, V11, P22, DOI 10.1016/j.scs.2013.11.001
- Ghofrani M, 2011, NAPS 2011 43 N AM PO, P13, DOI [10.1109/NAPS.2011.6025124, DOI 10.1109/NAPS.2011.6025124]
- Gouveia JP, 2016, ENERGBUILDINGS, V116, P666, DOI 10.1016/j.enbuild.2016.01.043
- Grandjean A, 2012, RENEW SUST ENERG REV, V16, P6539, DOI 10.1016/j.rser.2012.08.013
- Guan C, 2013, IEEE T POWER SYST, V28, P30, DOI 10.1109/TPWRS.2012.2197639
- Haben S, 2016, IEEE T SMART GRID, V7, P136, DOI 10.1109/TSG.2015.2409786
- Haben S, 2014, INT J FORECASTING, V30, P246, DOI [10.1016/j.ijforecast.2013.08.002, 10.1016/j.ijforecast.2013.08.002]
- Haider HT, 2016, RENEW SUST ENERG REV, V59, P166, DOI 10.1016/j.rser.2016.01.016
- Han J., 2008, J REFRIGERATION AIR, V29, P1
- Hargreaves T, 2010, ENERGPOLICY, V38, P6111, DOI 10.1016/j.enpol.2010.05.068
- Hernandez L, 2014, IEEE COMMUN SURV TUT, V16, P1460, DOI 10.1109/SURV.2014.032014.00094
- Hino H, 2013, IEEE T SMART GRID, V4, P1048, DOI 10.1109/TSG.2013.2240319
- Hong T, 2015, ELECT LOAD FORECASTI
- Horowitz S, 2014, APPL ENERG, V132, P47, DOI 10.1016/j.apenergy.2014.06.029
- Hosking JRM, 2013, APPL STOCH MODEL BUS, V29, P604, DOI 10.1002/asmb.1987
- Hsiao YH, 2015, IEEE T IND INFORM, V11, P33, DOI 10.1109/TII.2014.2363584
- Humeau S., 2013, SUSTAINABLE INTERNET, V2013, P1, DOI DOI 10.1109/SUSTAINIT.2013.6685208
- Hyndman Rob J, 2014, FORECASTING FORECAST, P138, DOI [10.1017/CB09781107415324.004, DOI 10.1017/CB09781107415324.004]
- Hyndman RJ, 2006, INT J FORECASTING, V22, P679, DOI 10.1016/j.ijforecast.2006.03.001
- Institute for Electric Efficiency, 2010, PLANS PROP, P1

- Ilic D, 2013, IMPROVING LOAD FOREC, P1
- Jain RK, 2014, APPL ENERG, V123, P168, DOI 10.1016/j.apenergy.2014.02.057
- James G, 2006, INTRO STAT LEARNING, V102, DOI [10.1016/j.peva.2007.06.006, DOI 10.1016/J.PEVA.2007.06.006]
- Javed F, 2012, APPL ENERG, V96, P150, DOI 10.1016/j.apenergy.2012.02.027
- Jokar P, 2016, IEEE T SMART GRID, V7, P216, DOI 10.1109/TSG.2015.2425222
- Kavgic M, 2010, BUILD ENVIRON, V45, P1683, DOI 10.1016/j.buildenv.2010.01.021
- Kavousian A, 2013, ENERGY, V55, P184, DOI 10.1016/j.energy.2013.03.086
- Kilkelly U, 2001, HUM RIGHTS HDB
- Kottek M, 2006, METEOROL Z, V15, P259, DOI 10.1127/0941-2948/2006/0130
- Kwac J, 2014, IEEE T SMART GRID, V5, P420, DOI 10.1109/TSG.2013.2278477
- Lisovich MA, 2010, IEEE SECUR PRIV, V8, P11, DOI 10.1109/MSP.2010.40
- Lister M, 2011, SCALING PEAKS DEMAND
- Livengood D, 2009, SERY SCI
- Logenthiran T, 2012, IEEE T SMART GRID, V3, P1244, DOI 10.1109/TSG.2012.2195686
- Lujano-Rojas JM, 2012, ENER POLICY, V45, P671, DOI 10.1016/j.enpol.2012.03.019
- Luthander R, 2015, APPL ENERG, V142, P80, DOI 10.1016/j.apenergy.2014.12.028
- Ma Z, ROLE DATA ANAL DEV I
- Marinescu A, 2014, IEEE IJCNN, P3767, DOI 10.1109/IJCNN.2014.6889425
- Marinescu A, 2013, 2013 2ND INTERNATIONAL WORKSHOP ON SOFTWARE ENGINEERING CHALLENGES FOR THE SMART GRID (SE4SG), P25, DOI 10.1109/SE4SG.2013.6596108
- Marino DL, 2016, NEURAL NETW
- Marvuglia A, 2012, ENRGY PROCED, V14, P45, DOI 10.1016/j.egypro.2011.12.895
- Masa-Bote D, 2014, APPL ENERG, V125, P103, DOI 10.1016/j.apenergy.2014.03.045
- MathWorks, 2015, DEC TREES
- McKenna E, 2012, ENER POLICY, V41, P807, DOI 10.1016/j.enpol.2011.11.049
- McLoughlin F, 2013, CHARACTERISING DOMES, P274
- McLoughlin F, 2015, APPL ENERG, V141, P190, DOI 10.1016/j.apenergy.2014.12.039
- McLoughlin F, 2013, ENERGY, V50, P120, DOI 10.1016/j.energy.2012.11.048
- Melrose J, 2015, BENCHMARKING SMART M, V1, DOI [10.1017/CB09781107415324.004, DOI 10.1017/CB09781107415324.004]
- Mocanu E, 2016, SUSTAIN ENERGY GRIDS, V6, P91, DOI 10.1016/j.segan.2016.02.005
- Mocanu E, 2014, IEEE SYS MAN CYBERN, P1, DOI 10.1109/SMC.2014.6973875
- Molderink A, 2010, IEEE T SMART GRID, V1, P109, DOI 10.1109/TSG.2010.2055904
- MOZER MC, 1995, CURRENT TRENDS IN CONNECTIONISM, P371
- Mufti GB, 2000, DETERMINING NUMBER G
- Navigant Research, 2017, SMART EL MET ADV MET
- Ndiaye D, 2011, ENER BUILDINGS, V43, P446, DOI 10.1016/j.enbuild.2010.10.008
- Ng A., 2015, ADVICE APPL MACHINE
- NG A, 2015, NEURAL NETWORKS LEAR
- Noureddine AH, 1992, IEEE
- Ozawa A, 2016, ENER BUILDINGS, V119, P200, DOI 10.1016/j.enbuild.2016.03.047
- Ozturk Y, 2013, IEEE T SMART GRID, V4, P694, DOI 10.1109/TSG.2012.2235088
- Pahasa J, 2007, 2007 CONFERENCE PROCEEDINGS IPEC, VOLS 1-3, P47
- PARTI M, 1980, BELL J ECON, V11, P309, DOI 10.2307/3003415
- Pedrasa Michael Angelo A, 2010, 2010 IEEE 11th International Conference on Probabilistic Methods Applied to Power Systems (PMAPS), P587, DOI 10.1109/PMAPS.2010.5528952
- Quilumba FL, 2015, IEEE T SMART GRID, V6, P911, DOI 10.1109/TSG.2014.2364233
- Raza MQ, 2015, RENEW SUST ENER REV, V50, P1352, DOI 10.1016/j.rser.2015.04.065
- Rhodes JD, 2014, APPL ENERG, V135, P461, DOI 10.1016/j.apenergy.2014.08.111
- Rodrigues F, 2014, ENRGY PROCED, V62, P220, DOI 10.1016/j.egypro.2014.12.383
- Rossi M, 2013, IEEE WORK ENV ENERGY, DOI [10.1109/EESMS.2013.6661693, DOI 10.1109/EESMS.2013.6661693]
- Ryu S, 2016, ENERGIES
- Samadi P, 2013, IEEE T SMART GRID, V4, P1007, DOI 10.1109/TSG.2012.2234769
- Sevlian R., 2014, SHORT TERM ELECT LOA
- Shahzadeh A, 2015, P INT JT C NEUR NETW, DOI [10.1109/IJCNN.2015.7280393, DOI 10.1109/IJCNN.2015.7280393]

Shaikh PH, 2014, RENEW SUST ENERG REV, V34, P409, DOI 10.1016/j.rser.2014.03.027  
Shorrocks L, 1991, P BUILD ENV PERFORM  
Siano P, 2014, RENEW SUST ENERG REV, V30, P461, DOI 10.1016/j.rser.2013.10.022  
Singh RP, 2012, INT CONF SMART GRID, P163, DOI 10.1109/SmartGridComm.2012.6485977  
Stephen B, 2014, IEEE T POWER DELIVER, V29, P88, DOI 10.1109/TPWRD.2013.2287032  
Suganthi L, 2012, RENEW SUST ENERG REV, V16, P1223, DOI 10.1016/j.rser.2011.08.014  
Sun Q, 2016, IEEE INTERNET THINGS, V3, P464, DOI 10.1109/JIOT.2015.2512325  
Swan LG, 2009, RENEW SUST ENERG REV, V13, P1819, DOI 10.1016/j.rser.2008.09.033  
Tascikaraoglu A, 2014, ENERG BUILDINGS, V80, P309, DOI 10.1016/j.enbuild.2014.05.042  
Tascikaraoglu A, 2016, ENERG BUILDINGS, V111, P380, DOI 10.1016/j.enbuild.2015.11.068  
Tidemann A, 2013, INT C EL DISTR, P10  
Torriti J, 2014, RENEW SUST ENERG REV, V37, P265, DOI 10.1016/j.rser.2014.05.034  
Tso GKF, 2007, ENERGY, V32, P1761, DOI 10.1016/j.energy.2006.11.010  
Urban G, 2016, DO DEEP CONVOLUTIONA, DOI [10.1038/nature14539, DOI 10.1038/NATURE14539]  
Vega AM, 2015, RENEW SUST ENERG REV, V52, P948, DOI 10.1016/j.rser.2015.07.023  
Veitch D, 2005, WAVELET NEURAL NETWO, P90  
Viegas JL, 2015, P 16 WORLD C INT FUZ, DOI [10.2991/ifsa-eusflat-15.2015.147, DOI 10.2991/IFSA-EUSFLAT-15.2015.147]  
Viegas JL, 2016, ENERGY, V107, P804, DOI 10.1016/j.energy.2016.04.065  
Wang Y. F., 2015, MATH PROBL ENG, V2015, P10, DOI DOI 10.1371/JOURNAL.PONE.0121893  
Wang Z, 2016, IEEE IJCNN, P1487, DOI 10.1109/IJCNN.2016.7727374  
Weron R, 2014, INT J FORECASTING, V30, P1030, DOI 10.1016/j.ijforecast.2014.08.008  
Widen J, 2010, APPL ENERG, V87, P1880, DOI 10.1016/j.apenergy.2009.11.006  
Wijaya TK, 2015, PROCEEDINGS 2015 IEEE INTERNATIONAL CONFERENCE ON BIG DATA, P879, DOI 10.1109/BigData.2015.7363836  
Wright A, 2007, APPL ENERG, V84, P389, DOI 10.1016/j.apenergy.2006.09.008  
Yang H. T., 2013, 2 INT C EL POW EQ MA, P1, DOI DOI 10.1109/PTC.2013.6652195  
Yildiz B, 2017, RENEW SUST ENERG REV, V73, P1104, DOI 10.1016/j.rser.2017.02.023  
Yildiz B, 2017, P WORLD REN EN C  
Yu Z, 2010, ENERG BUILDINGS, V42, P1637, DOI 10.1016/j.enbuild.2010.04.006  
Zhao HX, 2012, RENEW SUST ENERG REV, V16, P3586, DOI 10.1016/j.rser.2012.02.049  
Ziekow H, 2013, INT CONF SMART GRID, P229, DOI 10.1109/SmartGridComm.2013.6687962  
[Anonymous], 2016, PHOTOVOLTAIC POWER S

NR 153

TC 1

Z9 1

U1 24

U2 24

PU ELSEVIER SCI LTD

PI OXFORD

PA THE BOULEVARD, LANGFORD LANE, KIDLINGTON, OXFORD OX5 1GB, OXON, ENGLAND

SN 0306-2619

EI 1872-9118

J9 APPL ENERG

J1 Appl. Energy

PD DEC 15

PY 2017

VL 208

BP 402

EP 427

DI 10.1016/j.apenergy.2017.10.014

PG 26

WC Energy & Fuels; Engineering, Chemical

SC Energy & Fuels; Engineering

GA FN8UG

UT WOS:000416300400033

DA 2018-05-03

ER

PT J

AU Basinska, M

AF Basinska, M.

TI The use of multi-criteria optimization to choose solutions for energy-efficient buildings

SO BULLETIN OF THE POLISH ACADEMY OF SCIENCES-TECHNICAL SCIENCES

LA English

DT Article

DE global cost methodology; low energy buildings; European Union Directive; multi-criteria optimization

ID COST-OPTIMAL ANALYSIS; RESIDENTIAL BUILDINGS; DECISION-MAKING; ENVIRONMENTAL-IMPACT; SENSITIVITY-ANALYSIS; PERFORMANCE; SYSTEMS; DESIGN

AB The goal of this paper was to optimize the building envelope and technical equipment in the building through the mitigation of the global cost value, and then to evaluate the influence of the chosen assumptions on the primary energy index. The analyses carried out using global cost method allow for finding the cost optimal solution but only for the some range of primary energy index variability. In order to find the optimal solutions it was proposed to use the multi-criteria optimisation, assuming the following as basic criteria: a global cost value and investment prices increase (economic criteria), a primary energy index (energy-related criterion), an emission of carbon dioxide (environmental criterion). The analysed case study refers to the technical solutions for the residential buildings with the usable energy demand at the level of 40 and 15 kWh/m(2)/a. The presented method might be applied to different types of buildings: those being designed and those being the subject of the thermo-modernisation. The results demonstrate that the proposed model allows for classification of the alternative technical solutions regarding the designing process and the building's technical equipment. The carried out analyses indicate the economic possibility to achieve the low energy building standard and show the need to concentrate the activities related to the installation technology and used energy source.

C1 [Basinska, M.] Poznan Univ Tech, Inst Environm Engn, Fac Civil & Environm Engn, 4 Berdychowo St, PL-60965 Poznan, Poland.

RP Basinska, M (reprint author), Poznan Univ Tech, Inst Environm Engn, Fac Civil & Environm Engn, 4 Berdychowo St, PL-60965 Poznan, Poland.

EM malgorzata.basinska@put.poznan.pl

CR Airaksinen M, 2011, ENERGIES, V4, P1197, DOI 10.3390/en4081197

Nguyen AT, 2014, APPL ENERG, V113, P1043, DOI 10.1016/j.apenergy.2013.08.061

Avgelis A, 2009, ENERG BUILDINGS, V41, P774, DOI 10.1016/j.enbuild.2009.02.011

Baglivo C, 2015, ENERGY, V83, P560, DOI 10.1016/j.energy.2015.02.062

Balaras CA, 2005, ENERG BUILDINGS, V37, P429, DOI 10.1016/j.enbuild.2004.08.003

Bambook SM, 2011, ENERG BUILDINGS, V43, P1702, DOI 10.1016/j.enbuild.2011.03.013

Basinska M., 2015, RYNEK INSTALACYJNY, V3, P53

Basinska M, 2016, TECHNOL ECON DEV ECO, V22, P830, DOI 10.3846/20294913.2016.1211563

Basinska M, 2015, ENRGY PROCED, V78, P2040, DOI 10.1016/j.egypro.2015.11.204

Basinska M, 2015, ENERG BUILDINGS, V107, P307, DOI 10.1016/j.enbuild.2015.08.029

Diakaki C, 2010, ENERGY, V35, P5483, DOI 10.1016/j.energy.2010.05.012

EU Energy, 2013, TRANSP GHG EM TRENDS

Ferrara M, 2014, ENERG BUILDINGS, V84, P442, DOI 10.1016/j.enbuild.2014.08.031

Fesanghary M, 2012, BUILD ENVIRON, V49, P245, DOI 10.1016/j.buildenv.2011.09.030

Georges L, 2012, ENERG POLICY, V40, P452, DOI 10.1016/j.enpol.2011.10.037

Gerylo R, 2016, B POL ACAD SCI-TECH, V64, P697, DOI 10.1515/bpasts-2016-0079

Gerylo R., 2015, 61 SCI C CIV WAT ENG

Hamdy M, 2013, ENERG BUILDINGS, V56, P189, DOI 10.1016/j.enbuild.2012.08.023

Hamdy M, 2011, BUILD ENVIRON, V46, P109, DOI 10.1016/j.buildenv.2010.07.006

Heikkila K, 2004, BUILD ENVIRON, V39, P1133, DOI 10.1016/j.buidenv.2004.02.009

Hopfe CJ, 2013, BUILD ENVIRON, V69, P81, DOI 10.1016/j.buildenv.2013.07.019

The National Centre for Emissions Management (KOBiZE), CO2 EM FACT EL POW F

Koczyk H., 2015, 61 SCI C CIV WAT ENG

Lizana J, 2016, ENERG BUILDINGS, V129, P284, DOI 10.1016/j.enbuild.2016.07.043

Mroz T.M., 2013, ENERGY MANAGEMENT BU

Negendahl K, 2015, ENERG BUILDINGS, V105, P88, DOI 10.1016/j.enbuild.2015.06.087

The National Centre for Emissions Management (KOBiZE), 2015, WORD SPLITT VAL WO C  
PN EN, 15459 PN EN  
[Anonymous], 13790 PN EN ISO  
Shah VP, 2008, ENER G BUILDINGS, V40, P503, DOI 10.1016/j.enbuild.2007.04.004  
Szaflik W., 2011, HOT WATER SYSTEMS DE  
Tadeu SF, 2016, SUSTAIN CITIES SOC, V21, P12, DOI 10.1016/j.scs.2015.11.002  
Tian W, 2013, RENEW SUST ENER G REV, V20, P411, DOI 10.1016/j.rser.2012.12.014  
Wang JJ, 2009, RENEW SUST ENER G REV, V13, P2263, DOI 10.1016/j.rser.2009.06.021  
Witkowski T, 2009, B POL ACAD SCI-TECH, V57, P195, DOI 10.2478/v10175-010-0121-4  
NR 35  
TC 1  
Z9 1  
U1 2  
U2 2  
PU POLSKA AKAD NAUK, POLISH ACAD SCI, DIV IV TECHNICAL SCIENCES PAS  
PI WARSZAWA  
PA PL DEFILAD 1, WARSZAWA, 00-901, POLAND  
SN 0239-7528  
EI 2300-1917  
J9 B POL ACAD SCI-TECH  
JI Bull. Pol. Acad. Sci.-Tech. Sci.  
PD DEC  
PY 2017  
VL 65  
IS 6  
BP 815  
EP 826  
DI 10.1515/bpasts-2017-0084  
PG 12  
WC Engineering, Multidisciplinary  
SC Engineering  
GA FR3VL  
UT WOS:000418994700008  
OA gold  
DA 2018-05-03  
ER  
  
PT J  
AU Supasa, T  
    Hsiau, SS  
    Lin, SM  
    Wongsapai, W  
    Wu, JC  
AF Supasa, Tharinya  
    Hsiau, Shu-San  
    Lin, Shih-Mo  
    Wongsapai, Wongkot  
    Wu, Jiunn-Chi  
TI Household Energy Consumption Behaviour for Different Demographic Regions  
    in Thailand from 2000 to 2010  
SO SUSTAINABILITY  
LA English  
DT Article  
DE residential energy consumption; Thailand; structural decomposition  
    analysis; hybrid input-output  
ID STRUCTURAL DECOMPOSITION ANALYSIS; INPUT-OUTPUT-ANALYSIS; CARBON  
    EMISSIONS; CO2 EMISSIONS; CHINA; REQUIREMENTS; EFFICIENCY; POLICY;  
    MODEL; CONSERVATION



AB Since 1995, the residential sector has been a fast-growing energy consumption sector in Thailand. This sector contributes dramatically to the growth of Thailand's electricity and oil demand. Our study analysed Thailand's residential energy consumption characteristics and the seven underlying factors affecting the growth in energy use of five demographic regions using an energy input-output method. Embodied energy decomposition revealed that direct energy consumption accounted for approximately 30% of total residential energy use, whereas indirect energy consumption was at 70%. During the studied period, the growth in indirect energy use for all household groups was primarily the result of higher consumption of 'commerce', 'air transport', 'manufacturing', 'food and beverages' and 'agriculture' products. Moreover, each influencing driver contributes differently to each household's growth in energy demand. The number of households was the leading factor that dominated the increases in residential energy use in the Greater Bangkok and Central regions. Growth in residential energy consumption in the Northern, Northeastern and Southern regions was strongly dominated by changes in income per capita. Consumption structure and using energy-efficient products had a moderate impact on all regions' energy consumption. Thus, our findings provide additional energy-saving strategies to restrain further growth in residential energy demand.

C1 [Supasa, Tharinya; Hsiau, Shu-San; Wu, Jiunn-Chi] Natl Cent Univ, Inst Energy Engr, Dept Mech Engr, Jhongli 32001, Taiwan.

[Lin, Shih-Mo] Chung Yuan Christian Univ, Coll Business, Ctr Appl Econ Modelling, Jhongli 32023, Taiwan.

[Wongsapai, Wongkot] Chiang Mai Univ, Dept Mech Engr, Chiang Mai 50200, Thailand.

RP Hsiau, SS (reprint author), Natl Cent Univ, Inst Energy Engr, Dept Mech Engr, Jhongli 32001, Taiwan.

EM stharinya@gmail.com; sshsiau@cc.ncu.edu.tw; shihmo@cycu.edu.tw;

wongkot@eng.cmu.ac.th; junwu@ncu.edu.tw

FU National Central University, Taiwan

FX This research was supported by National Central University, Taiwan. The authors appreciate the reviewers for their valuable comments.

CR Rosas-Flores JA, 2010, ENERGY, V35, P2596, DOI 10.1016/j.energy.2010.01.015

Simpson A., 2015, J ELECT SCI TECHNOL, V13, P343

Brounen D, 2012, EUR ECON REV, V56, P931, DOI 10.1016/j.eurocorev.2012.02.007

BULLARD CW, 1975, ENER POLICY, V3, P268, DOI 10.1016/0301-4215(75)90035-X

Bureau of Trade and Economic, PROD PRIC IND PROD G

Cellura M, 2012, RENEW SUST ENER REV, V16, P1135, DOI 10.1016/j.rser.2011.11.016

Chen J, 2013, ENER BUILDINGS, V66, P193, DOI 10.1016/j.enbuild.2013.07.045

Choi JK, 2016, APPL ENER, V184, P830, DOI 10.1016/j.apenergy.2016.05.033

Department of Alternative Energy Development and Efficiency (DEDE), 2015, TABL THAIL EN BAL

Department of Alternative Energy Development and Efficiency (DEDE), THAIL EN SIT ANN REP

Ding YX, 2016, SUSTAINABILITY-BASEL, V8, DOI 10.3390/su8121285

Ehrhardt-Martinez K., 2011, P 2011 ECEEE SUMM ST

Ekhholm T, 2010, ENER POLICY, V38, P5696, DOI 10.1016/j.enpol.2010.05.017

Energy Policy and Planning Office (EPPO), 2015, ALT EN DEV PLAN

Energy Policy and Planning Office (EPPO), THAIL 20 YEAR EN EFF

Ghosh NK, 2014, ECOL ECON, V105, P55, DOI 10.1016/j.ecolecon.2014.05.002

Hong JK, 2016, ENER POLICY, V92, P56, DOI 10.1016/j.enpol.2016.01.017

International Energy Agency (IEA), THAIL EN BAL

Kok R, 2006, ENER POLICY, V34, P2744, DOI 10.1016/j.enpol.2005.04.006

Lenzen M, 2006, ENERGY, V31, P181, DOI 10.1016/j.energy.2005.01.009

Leontief WW, 1936, REV ECON STATISTICS, V18, P105, DOI 10.2307/1927837

Li K, 2015, RENEW SUST ENER REV, V52, P1107, DOI 10.1016/j.rser.2015.07.185

Lin BQ, 2015, ENER BUILDINGS, V86, P608, DOI 10.1016/j.enbuild.2014.10.049

Lin S. M., 2017, TAIWAN EC R IN PRESS

Lin WB, 2014, SUSTAINABILITY-BASEL, V6, P7710, DOI 10.3390/su6117710

Linden AL, 2006, ENER POLICY, V34, P1918, DOI 10.1016/j.enpol.2005.01.015

Lindner S, 2014, J IND ECOL, V18, P201, DOI 10.1111/jiec.12119

Miller R. E., 2009, INPUT OUTPUT ANAL FD

Nomura N., 2001, J JPN I ENERGY, V80, P727, DOI [10.3775/jie.80.727, DOI 10.3775/JIE.80.727]

Novianto D., 2015, ENERGY POWER ENG, V7, P465, DOI [10.4236/epe.2015.710045, DOI 10.4236/EPE.2015.710045]

National Statistics Office (NSO), AV MONTHL EXP PER HO

National Statistics Office (NSO), 2000 2010 POP HOUS C  
National Statistics Office (NSO), MAJ FIND 2010 HOUS S  
National Statistics Office (NSO), AV MONTHL INC PER HO  
National Statistics Office (NSO), AV MONTHL FUEL CONS  
National Statistics Office (NSO), MAJ FIND 2010 HOUS E  
Office of the National Economic and Social Development Board (NESDB), 2016, INP OUTP TABL THAIL  
Pachauri S, 2002, ENER POLICY, V30, P511, DOI 10.1016/S0301-4215(01)00119-7  
Park HC, 2007, ENER POLICY, V35, P2839, DOI 10.1016/j.enpol.2006.10.002  
Peters GP, 2007, ENVIRON SCI TECHNOL, V41, P5939, DOI 10.1021/es070108f  
Poortinga W, 2003, J ECON PSYCHOL, V24, P49, DOI 10.1016/S0167-4870(02)00154-X  
Reinders AHME, 2003, ENER POLICY, V31, P139, DOI 10.1016/S0301-4215(02)00019-8  
Simanaviciene Z, 2015, PROCD SOC BEHV, V191, P1996, DOI 10.1016/j.sbspro.2015.04.315  
Sriamankul W., 2011, INT J, V5, P131  
Su B, 2017, ENER POLICY, V105, P484, DOI 10.1016/j.enpol.2017.03.027  
Su B, 2015, APPL ENER, V154, P13, DOI 10.1016/j.apenergy.2015.04.101  
Su B, 2014, APPL ENER, V114, P377, DOI 10.1016/j.apenergy.2013.09.036  
Su B, 2012, ENER ECON, V34, P177, DOI 10.1016/j.eneco.2011.10.009  
Sukwan O., 2013, J IND ED, V7, P93  
Supasa T, 2016, ENER POLICY, V98, P210, DOI 10.1016/j.enpol.2016.08.028  
Tso GKF, 2014, ENERGY, V66, P722, DOI 10.1016/j.energy.2014.01.056  
U. S. Energy Information Administration (EIA), 2015, DRIV US HOUS EN CONS  
Verma A., 2012, BUILT ENV, V21, P703, DOI [10.1177/1420326X11425964, DOI 10.1177/1420326X11425964]  
Wang CJ, 2015, SUSTAINABILITY-BASEL, V7, P7548, DOI 10.3390/su7067548  
Wei YM, 2007, ENER POLICY, V35, P247, DOI 10.1016/j.enpol.2005.11.020  
Yu BY, 2013, ENER POLICY, V57, P441, DOI 10.1016/j.enpol.2013.02.024  
Zhang QY, 2004, ENER BUILDINGS, V36, P1217, DOI 10.1016/j.enbuild.2003.08.002  
Zhao CS, 2012, ENRGY PROCED, V14, P805  
Zhao XL, 2012, ENER POLICY, V41, P644, DOI 10.1016/j.enpol.2011.11.027  
Zheng XY, 2014, ENER POLICY, V75, P126, DOI 10.1016/j.enpol.2014.07.016  
Zhu Q, 2012, ENER POLICY, V48, P618, DOI 10.1016/j.enpol.2012.05.068

NR 61  
TC 1  
Z9 1  
U1 1  
U2 1  
PU MDPI AG  
PI BASEL  
PA ST ALBAN-ANLAGE 66, CH-4052 BASEL, SWITZERLAND  
SN 2071-1050  
J9 SUSTAINABILITY-BASEL  
JI Sustainability  
PD DEC  
PY 2017  
VL 9  
IS 12  
AR 2328  
DI 10.3390/su9122328  
PG 22  
WC GREEN & SUSTAINABLE SCIENCE & TECHNOLOGY; Environmental Sciences;  
Environmental Studies  
SC Science & Technology - Other Topics; Environmental Sciences & Ecology  
GA FR7FA  
UT WOS:000419231500174  
OA gold  
DA 2018-05-03  
ER

PT J

AU Kruusimagi, M  
 Sharples, S  
 Robinson, D

AF Kruusimagi, Martin  
 Sharples, Sarah  
 Robinson, Darren

TI Living with an autonomous spatiotemporal home heating system:  
 Exploration of the user experiences (UX) through a longitudinal  
 technology intervention-based mixed-methods approach

SO APPLIED ERGONOMICS

LA English

DT Article

DE User-experience; UX; Design; Human-computer interaction; Hci;  
 Spatiotemporal heating; Application; Interface; Longitudinal; Home  
 heating; Technology intervention

ID THERMOSTATS; CHALLENGES; AUTOMATION; BEHAVIOR

AB Rising energy demands place pressure on domestic energy consumption, but savings can be delivered through home automation and engaging users with their heating and energy behaviours. The aim of this paper is to explore user experiences (UX) of living with an automated heating system regarding experiences of control, understanding of the system, emerging thermal behaviours, and interactions with the system as this area is not sufficiently researched in the existing homes setting through extended deployment. We present a longitudinal deployment of a quasi-autonomous spatiotemporal home heating system in three homes. Users were provided with a smartphone control application linked to a self-learning heating algorithm. Rich qualitative and quantitative data presented here enabled a holistic exploration of UX. The paper's contribution focuses on highlighting key aspects of UX living with an automated heating systems including (i) adoption of the control interface into the social context, (ii) how users' vigilance in maintaining preferred conditions prevailed as a better indicator of system over-ride than gross deviation from thermal comfort, (iii) limited but motivated proactivity in system-initiated communications as best strategy for soliciting user feedback when inference fails, and (iv) two main motivations for interacting with the interface managing irregularities when absent from the house and maintaining immediate comfort, latter compromising of a checking behaviour that can transit to a system state alteration behaviour depending on mismatches. We conclude by highlighting the complex socio-technical context in which thermal decisions are made in a situated action manner, and by calling for a more holistic, UX-focused approach in the design of automated home systems involving user experiences. (C) 2017 The Authors. Published by Elsevier Ltd.

C1 [Kruusimagi, Martin; Sharples, Sarah] Univ Nottingham, Nottingham, England.  
 [Robinson, Darren] Univ Sheffield, Sheffield, S Yorkshire, England.

RP Kruusimagi, M (reprint author), Univ Nottingham, Nottingham, England.  
 EM martin@kruusimagi.com

FU Horizon Doctoral Training Centre at the University of Nottingham (RCUK  
 Grant) [EP/G037574/1]

FX The authors acknowledge Jacob Chapman and Daniel Ratzinger for their  
 invaluable input in the realisation of this project. The study was  
 approved by University of Nottingham Engineering ethics committee.  
 Martin Kruusimagi is supported by the Horizon Doctoral Training Centre  
 at the University of Nottingham (RCUK Grant No. EP/G037574/1).

CR AIRE Group MIT, 2012, MIT PROJ AIRE

ASHRAE, 1966, 5566 ASHRAE

Audenaert A, 2011, ENER POLICY, V39, P5219, DOI 10.1016/j.enpol.2011.05.042

BAINBRIDGE L, 1983, AUTOMATICA, V19, P775, DOI 10.1016/0005-1098(83)90046-8

Borgmann A, 1995, DISCOVERING DESIGN E, p[13, 22]

Brown T., 2010, STANFORD SOCIAL INNO, V8, P30

Bunt A., 2012, P ACM C INT US INT, P169

Department of Energy & Climate Change, 2014, EN CONS UK OVER EN C, V1970

Ecobee, 2015, SMART WIFI THERMOSTA

Fibaro, 2015, FIBARO UK HOME INTEL

Gao G., 2009, P 1 ACM WORKSH EMB S, P67, DOI DOI 10.1145/1810279.1810294

Georgia Institute of Technology, 2012, AW HOM RES IN

Glate, 2015, DEFENDOOR HOME SECUR  
 Gupta M, 2009, LECT NOTES COMPUT SC, V5538, P95, DOI 10.1007/978-3-642-01516-8\_8  
 Herkel S, 2008, BUILD ENVIRON, V43, P588, DOI 10.1016/j.buildenv.2006.06.031  
 Jaffari SD, 2009, IOP C SER EARTH ENV, V8, DOI 10.1088/1755-1315/8/1/012008  
 Krumm J, 2011, LECT NOTES COMPUT SC, V6696, P79, DOI 10.1007/978-3-642-21726-5\_6  
 Kulesza T., 2012, P 2012 ACM INT C INT, P375  
 Kwikset, 2015, LOCKS DOOR HARDWARE  
 Lim BY, 2009, CHI2009: PROCEEDINGS OF THE 27TH ANNUAL CHI CONFERENCE ON HUMAN FACTORS IN COMPUTING SYSTEMS, VOLS 1-4, P2119  
 Lu J., 2010, P 8 ACM C EMB NETW S, P211, DOI DOI 10.1145/1869983.1870005  
 Mozer M. C., 2012, ADAPTIVE HOUSE BOULD  
 Nest, 2012, NEST LEARN THERM  
 Nest, 2015, NEST PROT  
 Pachauri R. K., 2014, CLIMATE CHANGE 2014  
 Palmer J, 2011, GREAT BRITAINS HOUSI  
 Parasuraman R, 1997, HUM FACTORS, V39, P230, DOI 10.1518/001872097778543886  
 Peffer T, 2011, BUILD ENVIRON, V46, P2529, DOI 10.1016/j.buildenv.2011.06.002  
 Philips, 2015, MEET HUE  
 Ruyter B.D., 2007, INTERACTIONS, V14, P30  
 Scott J., 2011, P 13 INT C UB COMP U, P281  
 Sims R. E. H., 2007, ENERGY SUPPLY, P251  
 Stevenson F, 2010, BUILD RES INF, V38, P437, DOI 10.1080/09613218.2010.497282  
 Stevenson F, 2010, BUILD RES INF, V38, P549, DOI 10.1080/09613218.2010.496182  
 Suchman L., 1986, PLANS SITUATED ACTIO  
 Tuohy P. G., 2012, P 7 WINDS C CHANG CO, P12  
 University of Essex, 2012, INT ENV GROUP  
 University of Florida, 2012, GAT TECH SMART HOUS

NR 38

TC 1

Z9 1

U1 11

U2 17

PU ELSEVIER SCI LTD

PI OXFORD

PA THE BOULEVARD, LANGFORD LANE, KIDLINGTON, OXFORD OX5 1GB, OXON, ENGLAND

SN 0003-6870

EI 1872-9126

J9 APPL ERGON

Jl Appl. Ergon.

PD NOV

PY 2017

VL 65

BP 286

EP 308

DI 10.1016/j.apergo.2017.06.017

PG 23

WC Engineering, Industrial; Ergonomics; Psychology, Applied

SC Engineering; Psychology

GA FF0NC

UT WOS:000408597400030

PM 28802449

OA gold

DA 2018-05-03

ER

PT J

AU Kiluk, S

AF Kiluk, Sebastian

TI Diagnostic information system dynamics in the evaluation of machine learning algorithms for the supervision of energy efficiency of district heating-supplied buildings

SO ENERGY CONVERSION AND MANAGEMENT

LA English

DT Article

DE District heating; Energy efficiency; Machine learning; Information system dynamics; Entropy

ID BILLING SYSTEM; PERFORMANCE; DEMAND; SIMULATION; PATTERNS; MODEL

AB Modern ways of exploring the diagnostic knowledge provided by data mining and machine learning raise some concern about the ways of evaluating the quality of output knowledge, usually represented by information systems. Especially in district heating, the stationarity of efficiency models, and thus the relevance of diagnostic classification system, cannot be ensured due to the impact of social, economic or technological changes, which are hard to identify or predict. Therefore, data mining and machine learning have become an attractive strategy for automatically and continuously absorbing such dynamics. This paper presents a new method of evaluation and comparison of diagnostic information systems gathered algorithmically in district heating efficiency supervision based on exploring the evolution of information system and analyzing its dynamic features.

The process of data mining and knowledge discovery was applied to the data acquired from district heating substations' energy meters to provide the automated discovery of diagnostic knowledge base necessary for the efficiency supervision of district heating-supplied buildings. The implemented algorithm consists of several steps of processing the billing data, including preparation, segmentation, aggregation and knowledge discovery stage, where classes of abstract models representing energy efficiency constitute an information system representing diagnostic knowledge about the energy efficiency of buildings favorably operating under similar climate conditions and supplied from the same district heating network. The authors analyzed the evolution of a series of information systems originating from the same knowledge discovery algorithm applied to a sequence of energy consumption-related data. Specifically, the rough sets theory was applied to describe the knowledge base and measure the uncertainty of machine learning predictions of current classification based on a past knowledge base. Fluctuations of diagnostic class membership were identified and provided for the differentiation between returning and novel fault detections, thus introducing the qualities of information system uncertainty and its sustainability. The usability of the new method was demonstrated in the comparison of results for exemplary data mining algorithms implemented on real data from over one thousand buildings. (C) 2017 Elsevier Ltd. All rights reserved.

C1 [Kiluk, Sebastian] AGH Univ Sci & Technol, Fac Management, Gramatyka 10, PL-30067 Krakow, Poland.  
RP Kiluk, S (reprint author), AGH Univ Sci & Technol, Fac Management, Gramatyka 10, PL-30067 Krakow, Poland.

EM skiluk@agh.edu.pl

CR Nguyen AT, 2014, APPL ENERG, V113, P1043, DOI 10.1016/j.apenergy.2013.08.061

Bae C, 2009, BUILD ENVIRON, V44, P2300, DOI 10.1016/j.buildenv.2009.04.003

Baldi S, 2017, ENERG CONVERS MANAGE, V136, P329, DOI 10.1016/j.enconman.2017.01.016

Bergquist T, 2004, ALARM REDUCTION CORR

Bruhns H, 2000, APPL ENERG, V66, P277, DOI 10.1016/S0306-2619(00)00018-0

Chen YM, 2010, ENERG CONVERS MANAGE, V51, P1015, DOI 10.1016/j.enconman.2009.12.004

Dexter A., 1996, COMPUTER AIDED EVALU

Duda JT, SELECTED ISSUES ALGO, V1420

Duda JT, 2003, MATH MODELS STRUCT A

Duic N, 2014, ENERG CONVERS MANAGE, V87, P1057, DOI 10.1016/j.enconman.2014.08.046

Fan B, 2010, BUILD ENVIRON, V45, P2698, DOI 10.1016/j.buildenv.2010.05.031

Fan S, 2008, ENERG CONVERS MANAGE, V49, P1331, DOI 10.1016/j.enconman.2008.01.008

Gadd H, 2013, APPL ENERG, V108, P176, DOI 10.1016/j.apenergy.2013.02.062

Gershenfeld N, 2010, SCIENCE, V327, P1086, DOI 10.1126/science.1174082

Ginestet S, 2013, ENERG CONVERS MANAGE, V76, P368, DOI 10.1016/j.enconman.2013.07.057

Hou ZJ, 2006, ENERG CONVERS MANAGE, V47, P2479, DOI 10.1016/j.enconman.2005.11.010

Kialashaki A, 2013, APPL ENERG, V108, P271, DOI 10.1016/j.apenergy.2013.03.034

Kiluk S, 2014, APPL ENERG, V132, P1, DOI 10.1016/j.apenergy.2014.06.054

Kiluk S., 2006, THESIS

Kiluk S, 2012, APPL ENERG, V91, P146, DOI 10.1016/j.apenergy.2011.09.023

Kondepudi D., 1998, MODERN THERMODYNAMIC  
 Kusiak A, 2010, APPL ENERG, V87, P925, DOI 10.1016/j.apenergy.2009.09.004  
 Mostafavi ES, 2013, ENERG CONVERS MANAGE, V74, P548, DOI 10.1016/j.enconman.2013.06.031  
 Nordbladh F., 2002, TECH REP  
 Noren C., 1997, TYPICAL LOAD SHAPES, P146  
 Pawlak Z, 1997, EUR J OPER RES, V99, P48, DOI 10.1016/S0377-2217(96)00382-7  
 PAWLAK Z, 1991, SYSTEM THEORY KNOWLE, V9  
 Reddy BS, 2013, ENERG CONVERS MANAGE, V74, P403, DOI 10.1016/j.enconman.2013.06.040  
 Sanchez-Oro J, 2016, ENERG CONVERS MANAGE, V123, P445, DOI 10.1016/j.enconman.2016.06.050  
 Stern PC, 2010, SCIENCE, V328, P308, DOI 10.1126/science.328.5976.308  
 Tzafestas S., IMACS INT S AI EXP S  
 Wang ED, 2015, ENERG CONVERS MANAGE, V106, P530, DOI 10.1016/j.enconman.2015.09.072  
 Wang JD, 2016, ENERG CONVERS MANAGE, V120, P294, DOI 10.1016/j.enconman.2016.04.074  
 Wang X. Z., 1999, DATA MINING KNOWLEDG  
 Wollerstrand J., 1997, THESIS  
 NR 35  
 TC 1  
 Z9 1  
 U1 5  
 U2 5  
 PU PERGAMON-ELSEVIER SCIENCE LTD  
 PI OXFORD  
 PA THE BOULEVARD, LANGFORD LANE, KIDLINGTON, OXFORD OX5 1GB, ENGLAND  
 SN 0196-8904  
 EI 1879-2227  
 J9 ENERG CONVERS MANAGE  
 JI Energy Conv. Manag.  
 PD OCT 15  
 PY 2017  
 VL 150  
 BP 904  
 EP 913  
 DI 10.1016/j.enconman.2017.05.006  
 PG 10  
 WC Thermodynamics; Energy & Fuels; Mechanics  
 SC Thermodynamics; Energy & Fuels; Mechanics  
 GA FJ3CZ  
 UT WOS:000412609400073  
 DA 2018-05-03  
 ER  
  
 PT J  
 AU Yeatts, DE  
     Auden, D  
     Cooksey, C  
     Chen, CF  
 AF Yeatts, Dale E.  
     Auden, Dana  
     Cooksey, Christy  
     Chen, Chien-Fei  
 TI A systematic review of strategies for overcoming the barriers to  
     energy-efficient technologies in buildings  
 SO ENERGY RESEARCH & SOCIAL SCIENCE  
 LA English  
 DT Review  
 DE Barriers to energy-efficient technologies; Reduction of fossil fuels;  
     Environmental health; Building energy  
 ID SUSTAINABLE CONSTRUCTION; INNOVATION; TRANSITION; DIFFUSION; SECTOR;

## PERSPECTIVE; FRAMEWORK; ADOPTION

- AB The energy used to construct, operate and eventually demolish buildings has accounted for 40% of total energy used globally and 9% of the world's greenhouse emissions. When examining major energy consumers such as Europe or the United States, the amounts of energy used for buildings is even higher. The use of energy-efficient technologies (EETs), such as low-energy windows and programmable thermostats, have had many positive results, including long-term energy reductions, a healthier living environment, the creation of jobs, and better quality housing. Unfortunately, there continue to be barriers to the use of EETs. While there are dozens of strategies for overcoming these barriers, many have gotten overlooked or lost. This paper provides a review of the literature that has focused on barriers to the use of EETs and strategies for overcoming these barriers. The method used for identifying relevant literature was a systematic search of scholarly publications addressing barriers and/or strategies for EET use. A theoretical framework is presented as a means of organizing the literature. The framework includes three broad groups of barriers: knowledge of EETs, access to EETs, and desire to use EETs. Strategies for overcoming the barriers are likewise organized and described. (C) 2017 Elsevier Ltd. All rights reserved.
- C1 [Yeatts, Dale E.; Auden, Dana; Cooksey, Christy] Univ North Texas, Dept Sociol, Denton, TX 76203 USA. [Chen, Chien-Fei] Univ Tennessee, Dept Elect Engn & Comp Sci, Knoxville, TN 37996 USA.  
 RP Yeatts, DE (reprint author), Univ North Texas, Dept Sociol, Denton, TX 76203 USA.  
 EM yeatts@unt.edu; dmauden@gmail.com; ChristyCooksey@my.unt.edu; cchen26@utk.edu
- CR Abrahamse W, 2009, J ECON PSYCHOL, V30, P711, DOI 10.1016/j.joep.2009.05.006  
 Abromowitz D. M., 2008, GREEN AFFORDABLE HOU  
 Balachandra P, 2010, RENEW ENERG, V35, P1842, DOI 10.1016/j.renene.2009.12.020  
 Bangdome-Dery A., 2013, RES J ENG APPL SCI R, V2, P418  
 Beerepoot M, 2007, ENERG POLICY, V35, P4812, DOI 10.1016/j.enpol.2007.04.015  
 Cellura M, 2014, ENERG BUILDINGS, V72, P371, DOI 10.1016/j.enbuild.2013.12.046  
 Cellura M, 2013, RENEW ENERG, V60, P586, DOI 10.1016/j.renene.2013.06.019  
 Chen CF, 2016, ENERGY RES SOC SCI, V15, P1, DOI 10.1016/j.erss.2016.02.006  
 Chen R., SCI TOTAL ENV, V409  
 Coleman J., 2014, SOCIOMETRY, P253  
 Cowan R, 1996, TECHNOL FORECAST SOC, V53, P61, DOI 10.1016/0040-1625(96)00059-5  
 Crabtree L, 2009, HOUSING STUD, V24, P203, DOI 10.1080/02673030802704337  
 da Rocha A, 2009, ENTREP REGION DEV, V21, P529, DOI 10.1080/08985620802373453  
 U. S. DOE, 2017, EN INC PROGR  
 Egmond C, 2006, ENERG POLICY, V34, P3464, DOI 10.1016/j.enpol.2005.07.017  
 Energy Information Administration, 2014, TABL 2 1 TABL 7 6  
 EPC, 2013, MULT EN EFF  
 Fri RW, 2014, ENERGY RES SOC SCI, V1, P183, DOI 10.1016/j.erss.2014.03.010  
 Fuerst F, 2016, ENERG POLICY, V92, P20, DOI 10.1016/j.enpol.2016.01.024  
 Gann DM, 1998, BUILD RES INF, V26, P280, DOI 10.1080/096132198369760  
 Gow J. I., 2014, INNOVATION J PUBLIC, V19, P1  
 Griffin C., 2010, P STRUCT ARCH ICSA 2, P1315  
 Hankinson M., 2012, BARRIERS IMPACT IMPL  
 Hillman K, 2011, SCI PUBL POLICY, V38, P403, DOI 10.3152/030234211X12960315267499  
 Hong T., 2016, BUILD ENVIRON, P1  
 Horsky Dan, 1983, MARK SCI, V2, P1, DOI DOI 10.1287/MKSC.2.1.1  
 Hui S. C. M., 2002, OPPORTUNITIES CHALLE, P1  
 Hustvedt G, 2013, INT J CONSUM STUD, V37, P291, DOI 10.1111/ijcs.12007  
 Institute for Building Efficiency, 2012, FACT SHEET ASS VAL G  
 Ingerslev K., 2014, INNOVATION J PUBLIC, V19, P1  
 Janda KB, 2014, ENERG POLICY, V67, P48, DOI 10.1016/j.enpol.2013.08.058  
 Johansson O., 2011, INT J TECHNOL MGMT, V10, P251  
 Katz E., 1962, SOCIOL INQ, V32, P3  
 Killip G, 2013, ENVIRON PLANN C, V31, P876, DOI 10.1068/c11336  
 King M., MAKING BUSINESS ENER  
 Kiss B, 2016, J CLEAN PROD, V123, P65, DOI 10.1016/j.jclepro.2015.09.035  
 Krukowski A., 2012, ENERGY TRANSPARENCY  
 Laitner J. A., 2008, ENV QUAL MANAG, P47  
 Landman M., 1999, THESIS

Laustsen J., 2008, ENERGY EFFICIENCY RE, P1  
 Lees T., BUILD RES INF, V42  
 Lees T, 2014, BUILD RES INF, V42, P276, DOI 10.1080/09613218.2013.819547  
 Leung R., 2012, BUS RES CHINA, V6, P25  
 Levi D., 1993, J HIGH TECHNOL MANAG, V4  
 Lim J, 2012, TELECOMMUN POLICY, V36, P858, DOI 10.1016/j.telpol.2012.07.016  
 Managan K., DRIVING TRANSFORMATI  
 Marchman M., 2011, 47 ANN INT C P  
 McKay R., 2010, OVERCOMING BARRIERS, P173  
 Moezzi M., 2010, SUMM STUD EN EFF BUI  
 Moezzi M, 2014, ENERGY RES SOC SCI, V1, P30, DOI 10.1016/j.erss.2014.03.014  
 Nduka D. O., 2015, J ENV EARTH SCI, V5, P188  
 Nix O., 2011, UNLOCKING ENERGY PER  
 Njuguna DG, 1997, HABITAT INT, V21, P347, DOI 10.1016/S0197-3975(97)00009-X  
 Nutter C., 2012, EMERGING RISKS DESIG  
 Precourt Energy Efficiency Center, 2016, BUILD RES  
 Petersen E., 2007, INT J SUSTAINABILITY, V8, P16, DOI DOI 10.1108/14676370710717562  
 Pacific Gas and Electric Company, 2017, DEM RESP PROGR OPT  
 Pless S., 2013, GUIDE ENERGY PERFORM  
 Ralph M, 2014, HIGH EDUC, V67, P71, DOI 10.1007/s10734-013-9641-9  
 Rogers DS, 2012, CURR OPIN ENV SUST, V4, P61, DOI 10.1016/j.cosust.2012.01.013  
 Rogers E., 2003, DIFFUSION INNOVATION  
 Rohracher H, 2001, TECHNOL ANAL STRATEG, V13, P137, DOI 10.1080/09537320120040491  
 ROSA EA, 1988, ANNU REV SOCIOL, V14, P149, DOI 10.1146/annurev.so.14.080188.001053  
 S. European Commission, 2007, LEAD MARK IN EUR ACT  
 Saraswat S., 2015, INT RES J SOC SCI, V4, P23  
 Schweber L, 2010, CONSTR MANAG ECON, V28, P657, DOI 10.1080/01446191003702468  
 Simon GL, 2010, ENVIRON PLANN A, V42, P2011, DOI 10.1068/a42498  
 Sovacool BK, 2014, ENERGY RES SOC SCI, V1, P1, DOI 10.1016/j.erss.2014.02.003  
 Stein J., 2004, ENSURING SUSTAINABIL  
 Stone D, 2000, GOVERNANCE, V13, P45, DOI 10.1111/0952-1895.00123  
 Symes M., 1999, J URBAN DESIGN, V4, P97  
 Taneja O., 2011, MEASURES MAINTAINING  
 Titus M. S., 2012, US GOVT INITIATIVES  
 United Nations Environment Programme (UNEP), 2009, BUILD CLIM CHANG SUM  
 \*US EN INF ADM, 2009, ANN EN REV  
 van Bueren EM, 2002, ENVIRON PLANN B, V29, P75, DOI 10.1068/b2785  
 WBCSD, EN EFF BUILD BUS REA  
 Webber M., 1981, PROG HUM GEOGR, V30, P487  
 Williams K, 2007, SUSTAIN DEV, V15, P135, DOI 10.1002/sd.308  
 [Anonymous], 2013, BUS CAS GREEN BUILD  
 Xu XJ, 2015, J ENVIRON PSYCHOL, V44, P95, DOI 10.1016/j.jenvp.2015.09.004  
 Zaleski S., 2015, ENERGY DEP HELPS CIT, P1

NR 82

TC 1

Z9 1

U1 4

U2 4

PU ELSEVIER SCIENCE BV

PI AMSTERDAM

PA PO BOX 211, 1000 AE AMSTERDAM, NETHERLANDS

SN 2214-6296

EI 2214-6326

J9 ENERGY RES SOC SCI

JI Energy Res. Soc. Sci.

PD OCT

PY 2017

VL 32



SI SI  
 BP 76  
 EP 85  
 DI 10.1016/j.erss.2017.03.010  
 PG 10  
 WC Environmental Studies  
 SC Environmental Sciences & Ecology  
 GA FM1RS  
 UT WOS:000414758300007  
 DA 2018-05-03  
 ER

PT J  
 AU Lin, HY  
 Wang, QX  
 Wang, Y  
 Liu, YL  
 Sun, Q  
 Wennersten, R  
 AF Lin, Haiyang  
 Wang, Qinxing  
 Wang, Yu  
 Liu, Yiling  
 Sun, Qie  
 Wennersten, Ronald

TI The energy-saving potential of an office under different pricing mechanisms - Application of an agent-based model

SO APPLIED ENERGY

LA English

DT Article

DE Agent-based model; Energy saving potential; Public building; Electricity price; Energy system

ID DISTRICT-HEATING SYSTEMS; ELECTRICITY CONSUMPTION; AIR-CONDITIONERS; HOUSEHOLD ELECTRICITY; RESIDENTIAL BUILDINGS; PERFORMANCE; CHINA; DEMAND; REFORM; OPTIMIZATION

AB This paper developed an agent-based model (ABM) to explore the energy saving potentials (ESPs) of various types of appliances in offices under different pricing mechanisms. The model included four types of commonly used appliances in office buildings: an air conditioner (AC), computers, lights and a basic load. The total ESPs of the entire office are 6.7% and 17.4% on the second and the third price tier of the tiered pricing mechanism (TEP), while the ESPs are 11.8% and 14.2% under the peak-valley pricing (PVP) and critical peak pricing (CPP), respectively. Within different types of appliances, AC consumes the largest amount of electricity, over 50%, while the ESPs of the AC under different pricing mechanisms are only 6.9-12.1%. In contrast, the lights have the biggest ESP, be. 14.1-53.4%, under various pricing levels. Both the pricing mechanisms of PVP and CPP only have the effect of peak clipping and do not have a significant effect of valley filling, since there is no people working in the office during the valley price period. The maximum ESP, which is based on people's maximum-saving behavior, is much larger than the ESPs on the basis of people's ordinary consumption patterns. This implies the importance of improving people's awareness of energy saving and refining their behaviors. Lastly, the model developed in this study provides a generic platform for simulating many types of energy systems and is very effective for handling the complicated relations between different types of technology and the way how they are used and interacted with each other. ABMs have very good adaptability and capacity in simulating energy systems. (C) 2017 Elsevier Ltd. All rights reserved.

C1 [Lin, Haiyang; Wang, Qinxing; Wang, Yu; Liu, Yiling; Sun, Qie; Wennersten, Ronald] Shandong Univ, Inst Thermal Sci & Technol, Jingshi Rd 17923, Jinan 250061, Shandong, Peoples R China.

RP Sun, Q (reprint author), Shandong Univ, Inst Thermal Sci & Technol, Jingshi Rd 17923, Jinan 250061, Shandong, Peoples R China.

EM qie@sdu.edu.cn

FU Natural Science Foundation of Shandong Province, China [ZR2014EEM025];

973 Program, China [2013CB228305]

FX This work was supported in part by Project ZR2014EEM025 supported by Natural Science Foundation of Shandong Province, China; and the 973 Program 2013CB228305, China.

- CR Alirezaei M, 2016, ENERGBUILDINGS, V130, P465, DOI 10.1016/j.enbuild.2016.08.044  
Andersen PD, 2014, ENERGBUILDINGS, V69, P213, DOI 10.1016/j.enbuild.2013.10.001  
Azar E, 2016, APPL ENERGBUILDINGS, V183, P926, DOI 10.1016/j.apenergy.2016.09.022  
Azar E, 2012, ENERGBUILDINGS, V55, P841, DOI 10.1016/j.enbuild.2012.10.002  
Bonte M, 2014, ENERGBUILDINGS, V76, P219, DOI 10.1016/j.enbuild.2014.02.068  
Chen H, 2008, ENERGBUILDINGS, V49, P1416, DOI 10.1016/j.enconman.2007.12.024  
Day JK, 2015, BUILD ENVIRON, V84, P114, DOI 10.1016/j.buildenv.2014.11.003  
Derakhshan G, 2016, ENERGBUILDINGS, V94, P295, DOI 10.1016/j.enpol.2016.04.009  
Du G, 2015, APPL ENERGBUILDINGS, V157, P276, DOI 10.1016/j.apenergy.2015.08.003  
Firth S, 2008, ENERGBUILDINGS, V40, P926, DOI 10.1016/j.enbuild.2007.07.005  
Ghedamsi R, 2016, ENERGBUILDINGS, V121, P309, DOI 10.1016/j.enbuild.2015.12.030  
Hong TZ, 2016, ENERGBUILDINGS, V116, P694, DOI 10.1016/j.enbuild.2015.11.052  
Huang X, 2013, AIR CONDITION SYSTEM  
Jim CY, 2014, APPL ENERGBUILDINGS, V128, P49, DOI 10.1016/j.apenergy.2014.04.055  
Kato Takaaki, 2016, Electricity Journal, V29, P12, DOI 10.1016/j.tej.2016.02.002  
Khan AR, 2016, RENEW SUST ENERGBUILDINGS, V54, P1311, DOI 10.1016/j.rser.2015.10.117  
Kohler M, 2016, APPL ENERGBUILDINGS, V184, P40, DOI 10.1016/j.apenergy.2016.09.075  
Li CB, 2014, APPL ENERGBUILDINGS, V117, P149, DOI 10.1016/j.apenergy.2013.11.057  
Li HL, 2015, RENEW SUST ENERGBUILDINGS, V42, P56, DOI 10.1016/j.rser.2014.10.003  
Liang HH, 2012, APPL ENERGBUILDINGS, V94, P355, DOI 10.1016/j.apenergy.2012.02.004  
Lin H, 2016, 8 INT C APPL EN 2016  
Lin HY, 2016, ENERGBUILDINGS, V104, P329, DOI 10.1016/j.egypro.2016.12.056  
Lin YH, 2016, APPL ENERGBUILDINGS, V171, P336, DOI 10.1016/j.apenergy.2016.03.018  
Ma HT, 2017, ENERGBUILDINGS, V136, P139, DOI 10.1016/j.enbuild.2016.11.037  
Ma ZY, 2014, ENERGBUILDINGS, V85, P464, DOI 10.1016/j.enbuild.2014.09.048  
Ma ZY, 2011, IEEE T PATTERN ANAL, V33, P2160, DOI 10.1109/TPAMI.2011.63  
Mohajeryami S, 2016, ELECTR POW SYST RES, V135, P1, DOI 10.1016/j.epsr.2016.03.026  
Park HS, 2016, APPL ENERGBUILDINGS, V173, P225, DOI 10.1016/j.apenergy.2016.04.035  
Sahin MC, 2014, APPL ENERGBUILDINGS, V114, P531, DOI 10.1016/j.apenergy.2013.10.021  
Sandels C, 2014, APPL ENERGBUILDINGS, V131, P267, DOI 10.1016/j.apenergy.2014.06.048  
Shibuya T, 2016, ENERGBUILDINGS, V117, P149, DOI 10.1016/j.enbuild.2016.02.023  
Sopha BM, 2011, ENERGBUILDINGS, V39, P2722, DOI 10.1016/j.enpol.2011.02.041  
Sun CW, 2015, APPL ENERGBUILDINGS, V160, P383, DOI 10.1016/j.apenergy.2015.09.030  
Sun Q, 2016, IEEE INTERNET THINGS, V3, P464, DOI 10.1109/JIOT.2015.2512325  
Wang C, 2016, ENERGBUILDINGS, V88, P781, DOI 10.1016/j.egypro.2016.06.128  
Wang N, 2013, ENERGBUILDINGS, V65, P412, DOI 10.1016/j.enbuild.2013.06.011  
Wang Y, 2016, APPL ENERGBUILDINGS, V175, P40, DOI 10.1016/j.apenergy.2016.04.100  
Wang ZX, 2015, ENERGBUILDINGS, V109, P12, DOI 10.1016/j.enbuild.2015.10.002  
Wang Z, 2012, APPL ENERGBUILDINGS, V99, P247, DOI 10.1016/j.apenergy.2012.05.020  
Widen J, 2010, APPL ENERGBUILDINGS, V87, P1880, DOI 10.1016/j.apenergy.2009.11.006  
Yang R, 2013, ENERGBUILDINGS, V56, P1, DOI 10.1016/j.enbuild.2012.10.025  
Yu XQ, 2016, APPL ENERGBUILDINGS, V183, P725, DOI 10.1016/j.apenergy.2016.09.033  
Yurtseven MB, 2014, ENERGBUILDINGS, V68, P165, DOI 10.1016/j.enbuild.2013.09.020  
Zhang T, 2011, ENERGBUILDINGS, V43, P2882, DOI 10.1016/j.enbuild.2011.07.007  
Zhou K, 2015, RENEW SUST ENERGBUILDINGS, V47, P954, DOI 10.1016/j.rser.2015.03.036  
Zhou X, 2015, ENERGBUILDINGS, V86, P275, DOI 10.1016/j.enbuild.2014.09.071  
Zhuang XL, 2014, ENERGBUILDINGS, V76, P661, DOI 10.1016/j.enbuild.2013.11.042

NR 47

TC 1

Z9 1

U1 14

U2 17

PU ELSEVIER SCI LTD

PI OXFORD

PA THE BOULEVARD, LANGFORD LANE, KIDLINGTON, OXFORD OX5 1GB, OXON, ENGLAND  
SN 0306-2619  
EI 1872-9118  
J9 APPL ENERG  
JI Appl. Energy  
PD SEP 15  
PY 2017  
VL 202  
BP 248  
EP 258  
DI 10.1016/j.apenergy.2017.05.140  
PG 11  
WC Energy & Fuels; Engineering, Chemical  
SC Energy & Fuels; Engineering  
GA FC9VF  
UT WOS:000407188500021  
DA 2018-05-03  
ER

PT J

AU Huo, HE

Shao, JH

Huo, HB

AF Huo, Haie

Shao, Junhu

Huo, Haibo

TI Contributions of energy-saving technologies to building energy saving in  
different climatic regions of China

SO APPLIED THERMAL ENGINEERING

LA English

DT Article

DE Contribution rate; Energy-saving technology; Discomfort degree hours;  
Annual load; Climatic regions

ID OPTIMUM INSULATION THICKNESS; RESIDENTIAL BUILDINGS; THERMOPHYSICAL  
PROPERTIES; THERMAL PERFORMANCE; WINTER ZONE; ENVELOPE; SIMULATION;  
DESIGN; WALLS; CONSUMPTION

AB In China, the commonly used energy-saving technologies (ESTs) include the external insulation for roof and external wall, shading technology and natural ventilation. It is well known that the same EST demonstrates different effects in different climatic regions. In this study, the contribution rates of building envelopes in annual load and that of ESTs in energy saving are quantitatively investigated with the Finite Volume Method under unsteady-state conditions. A representative individual building is selected as the case model. Four typical cities of Shenyang, Beijing, Chengdu and Guangzhou are selected to represent different climatic regions of China. Results show that the critical parts where the energy-saving measures should be taken are roof and exterior wall. The contribution of external insulation dominates in the energy saving of the building models in all of the four climatic regions. In addition, shading device should be applied based on the climatic conditions. Natural ventilation is worth using in building design as it requires no capital investment except in severe cold zones in China. (c) 2017 Elsevier Ltd. All rights reserved.

C1 [Huo, Haie; Shao, Junhu] Sichuan Normal Univ, Engn Coll, Chengdu 610101, Sichuan, Peoples R China.

[Huo, Haibo] Shanghai Ocean Univ, Ocean Engn Res Inst, Shanghai 201306, Peoples R China.

RP Huo, HB (reprint author), Shanghai Ocean Univ, Ocean Engn Res Inst, Shanghai 201306, Peoples R China.

EM hbhuo@shou.edu.cn

FU Education Department of Sichuan Province [17ZA0326]

FX This work was supported by the Key Project of Education Department of  
Sichuan Province (No. 17ZA0326).

CR Alzoubi HH, 2010, ENERGETIC MANAGEMENT, V51, P1592, DOI 10.1016/j.enconman.2009.08.039

China Meteorological Bureau -Climate Information Center -Climate Data Office and Tsinghua University -  
Department of Building Science and Technology, 2005, CHINA METEOROLOGICAL BUREAU CLIMATE INFORMATION CENTER

[Anonymous], 2005, GB501892005  
[Anonymous], 2012, GB507362012  
[Anonymous], 1993, GB5017693  
Huang JN, 2014, ENER G BUILDINGS, V75, P504, DOI 10.1016/j.enbuild.2014.02.040  
Huo H, 2015, INT J HEAT MASS TRAN, V90, P246, DOI 10.1016/j.ijheatmasstransfer.2015.06.029  
Ihm P, 2012, ENER G POLICY, V44, P1, DOI 10.1016/j.enpol.2011.08.046  
[Anonymous], 2010, JGJ262010  
[Anonymous], 2010, JGJ1342010  
[Anonymous], 2003, JGJ752003  
Kayfeci M, 2013, APPL THERM ENG, V50, P217, DOI 10.1016/j.applthermaleng.2012.06.031  
Kaynakli O., 2012, ENERGY REV, V16, P415  
Koo C, 2014, APPL ENER G, V115, P205, DOI 10.1016/j.apenergy.2013.11.014  
LU Yaoqing, 2007, PRACTICAL DESIGN MAN  
McKay MD, 1988, UNCERTAINTY ANAL, P145  
Naouel D, 2011, APPL ENER G, V88, P156  
Ozel M, 2013, ENER G CONVERS MANAGE, V66, P106, DOI 10.1016/j.enconman.2012.10.002  
Ozel M, 2011, APPL THERM ENG, V31, P3854, DOI 10.1016/j.applthermaleng.2011.07.033  
Peng CH, 2014, ENER G BUILDINGS, V78, P123, DOI 10.1016/j.enbuild.2014.04.023  
Sadeghifam AN, 2015, ENER G BUILDINGS, V86, P525, DOI 10.1016/j.enbuild.2014.10.052  
Simonson C, 2005, ENER G BUILDINGS, V37, P23, DOI 10.1016/j.enbuild.2004.006  
Su X, 2010, ENER G BUILDINGS, V42, P198, DOI 10.1016/j.enbuild.2009.08.015  
Teres-Zubiaga J, 2015, ENER G BUILDINGS, V86, P194, DOI 10.1016/j.enbuild.2014.10.018  
Tsikaloudaki K, 2012, ENER G CONVERS MANAGE, V64, P335, DOI 10.1016/j.enconman.2012.04.020  
Wang J, 2013, ENER G BUILDINGS, V67, P210, DOI 10.1016/j.enbuild.2013.08.029  
Yang L, 2008, ENER G CONVERS MANAGE, V49, P113, DOI 10.1016/j.enconman.2007.05.004  
Yu JH, 2013, ENER G BUILDINGS, V64, P264, DOI 10.1016/j.enbuild.2013.05.018  
Zhang YP, 2006, ENER G BUILDINGS, V38, P1164, DOI 10.1016/j.enbuild.2006.01.008  
Zhou SY, 2013, ENER G BUILDINGS, V57, P103, DOI [10.1016/j.enbuild.2012.11.0.19,  
10.1016/j.enbuild.2012.11.019]  
NR 30  
TC 1  
Z9 1  
U1 7  
U2 12  
PU PERGAMON-ELSEVIER SCIENCE LTD  
PI OXFORD  
PA THE BOULEVARD, LANGFORD LANE, KIDLINGTON, OXFORD OX5 1GB, ENGLAND  
SN 1359-4311  
J9 APPL THERM ENG  
JI Appl. Therm. Eng.  
PD SEP  
PY 2017  
VL 124  
BP 1159  
EP 1168  
DI 10.1016/j.applthermaleng.2017.06.065  
PG 10  
WC Thermodynamics; Energy & Fuels; Engineering; Mechanical; Mechanics  
SC Thermodynamics; Energy & Fuels; Engineering; Mechanics  
GA FC9TW  
UT WOS:000407185000108  
DA 2018-05-03  
ER  
  
PT J  
AU Barbieri, N  
Palma, A  
AF Barbieri, Nicolo

Palma, Alessandro

TI Mapping energy-efficient technological advances in home appliances

SO ENERGY EFFICIENCY

LA English

DT Article

DE Energy efficiency; Self-organising maps; Patent analysis; Home appliances; ICTs

ID SELF-ORGANIZING MAP; NEURAL-NETWORKS; PATENT ANALYSIS; UNITED-STATES; MARKET VALUE; K-MEANS; INNOVATION; FIRMS; PATTERNS; INDUSTRY

AB The present study employs patent data on three groups of large energy-efficient appliances (i.e. freezers/refrigerators, washing machines and dishwashers) and provides a methodology for (i) mapping components related to energy efficiency improvements, (ii) mapping their evolution over time and (iii) testing the technological fungibility of these components. Our analysis model exploits an original patent selection process and the concept of technological relatedness using co-occurrence analysis of patent classes as input for self-organising maps (SOMs), an unsupervised artificial neural network able to represent high-dimensional data in a visually attractive and two-dimensional distance-based map. The results confirm the pervasive nature of energy efficiency to be nested in many technological components. In addition, we show that a dematerialisation process has affected the evolution of energy efficiency technologies over time, in a technology space characterised by a high level of complexity and variety. Energy efficiency has links with information technologies embodied in the appliances, which are far from their maturity path. Consequently, innovation and information policies are of utmost importance in order to achieve more ambitious energy efficiency targets in the groups of appliances analysed.

C1 [Barbieri, Nicolo] Univ Ferrara, Dept Econ & Management, Via Voltapaletto 11, I-44121 Ferrara, Italy.

[Barbieri, Nicolo] SEEDS, Via Voltapaletto 11, I-44121 Ferrara, Italy.

[Palma, Alessandro] Bocconi Univ, IEFE, Via Roentgen 1, I-20136 Milan, Italy.

[Palma, Alessandro] Univ Roma Tor Vergata, Fac Econ, CEIS, Via Columbia 2, I-00133 Rome, Italy.

RP Barbieri, N (reprint author), SEEDS, Via Voltapaletto 11, I-44121 Ferrara, Italy.

EM brbncl@unife.it; alessandro.palma@unibocconi.it

FU Italian Ministry of Education, University and Research (Scientific Research Programme of National Relevance)

FX We acknowledge financial support from the Italian Ministry of Education, University and Research (Scientific Research Programme of National Relevance 2010 on 'Climate change in the Mediterranean area: scenarios, economic impacts, mitigation policies and technological innovation'). We are also grateful to Davide Consoli, Valeria Costantini and Nicoletta Corrocher for their precious comments and suggestions. The usual disclaimer applies.

CR Abbas A, 2014, WORLD PAT INF, V37, P3, DOI 10.1016/j.wpi.2013.12.006

Enachescu C., 2014, SCIENTOMETRICS, V102, P1

Antonelli C, 2003, REG STUD, V37, P595, DOI 10.1080/0034340032000108705

ANTONELLI C., 1992, EC INFORM NETWORKS

Antonelli C., 1992, EC INFORM NETWORKS E

Antonelli C., 1999, MICRODYNAMICS TECHNO

Archibugi D, 1996, TECHNOVATION, V16, P451, DOI 10.1016/0166-4972(96)00031-4

Arundel A, 1998, RES POLICY, V27, P127, DOI 10.1016/S0048-7333(98)00033-X

Atanasiu B, 2008, ENERG BUILDINGS, V40, P112, DOI 10.1016/j.enbuild.2007.01.017

Barbera-Tomas D, 2012, TECHNOL FORECAST SOC, V79, P932, DOI 10.1016/j.techfore.2011.12.009

Barbieri N, 2015, ECOL ECON, V117, P140, DOI 10.1016/j.ecolecon.2015.06.017

Bertoldi P., 2007, 22753EN EUR JRC EUR

Borg SP, 2011, ENERG BUILDINGS, V43, P2240, DOI 10.1016/j.enbuild.2011.05.001

Breschi S, 2003, RES POLICY, V32, P69, DOI 10.1016/S0048-7333(02)00004-5

BRESNAHAN TF, 1995, J ECONOMETRICS, V65, P83, DOI 10.1016/0304-4076(94)01598-T

Bresnahan T, 2010, HBK ECON, V2, P761, DOI 10.1016/S0169-7218(10)02002-2

Burwell C.C., 1990, ELECT AM EC AGENT TE

CAMPANARIO JM, 1995, SCIENTOMETRICS, V33, P23, DOI 10.1007/BF02020773

Carlei V, 2014, PATTERN RECOGN LETT, V40, P1, DOI 10.1016/j.patrec.2013.11.023

Cecere G, 2014, RES POLICY, V43, P1827, DOI 10.1016/j.respol.2014.06.004

Chi SC, 2008, J INF SCI ENG, V24, P1445

- Corrocher N, 2007, RES POLICY, V36, P418, DOI 10.1016/j.respol.2007.01.002
- Costantini V., 2013, DYNAMICS ENV EC SYST
- Costantini V., 2014, EC KNOWLEDGE GENERAT
- Datta S, 2014, J ENVIRON ECON MANAG, V68, P480, DOI 10.1016/j.jeem.2014.09.003
- DAVIES DL, 1979, IEEE T PATTERN ANAL, V1, P224, DOI 10.1109/TPAMI.1979.4766909
- Dernis H., 2004, OECD SCI TECHNOLOGY
- Eurobarometer, 2011, TECHNICAL REPORT
- EC-JTR, 2012, EL CONS EFF TRENDS E
- Epicoco M, 2013, RES POLICY, V42, P180, DOI 10.1016/j.respol.2012.06.009
- Filippini M, 2014, ENER POLICY, V69, P73, DOI 10.1016/j.enpol.2014.01.047
- Florax RJGM, 2011, IMPROVING ENERGY EFFICIENCY THROUGH TECHNOLOGY: TRENDS, INVESTMENT BEHAVIOUR AND POLICY DESIGN, P1
- Galarraga I, 2011, J CLEAN PROD, V19, P2075, DOI 10.1016/j.jclepro.2011.06.025
- Galarraga I, 2016, ENER POLICY, V90, P24, DOI 10.1016/j.enpol.2015.12.010
- Galarraga I, 2011, ENER ECON, V33, pS66, DOI 10.1016/j.eneco.2011.07.028
- Gillingham K, 2009, ANNU REV RESOUR ECON, V1, P597, DOI 10.1146/annurev.resource.102308.124234
- Giudici P., 2003, APPL DATA MINING STA
- GRILICHES Z, 1990, J ECON LIT, V28, P1661
- Griliches Z., 1998, R D PRODUCTIVITY ECO
- Hall BH, 2005, RAND J ECON, V36, P16
- Huang Z, 2004, J NANOPART RES, V6, P325, DOI 10.1007/s11051-004-4117-6
- Hyung C. K., 2006, ENER POLICY, V34, P2310
- IEA, 2012, EN TECHN PERSP 2012
- IEA, 2009, GADG GIG POL EN EFF
- Jaffe A., 2004, J ECON LIT, V42, P1158
- JAFFE AB, 1986, AM ECON REV, V76, P984
- Kim YG, 2008, EXPERT SYST APPL, V34, P1804, DOI 10.1016/j.eswa.2007.01.033
- Kohonen T, 1998, NEUROCOMPUTING, V21, P1, DOI 10.1016/S0925-2312(98)00030-7
- Kohonen T, 1996, P IEEE, V84, P1358, DOI 10.1109/5.537105
- KOHONEN T, 1990, P IEEE, V78, P1464, DOI 10.1109/5.58325
- Kohonen T., 2001, SELF ORGANIZING MAPS, V30
- Kohonen T, 2013, NEURAL NETWORKS, V37, P52, DOI 10.1016/j.neunet.2012.09.018
- Koomey Jonathan G., 2007, ESTIMATING TOTAL POW
- Krafft J., 2011, EC INNOVATION NEW TE, V20, P445, DOI DOI 10.1080/10438599.2011.562355
- Kuo RJ, 2002, COMPUT OPER RES, V29, P1475, DOI 10.1016/S0305-0548(01)00043-0
- Lagus K, 2004, INFORM SCIENCES, V163, P135, DOI 10.1016/j.ins.2003.03.017
- Lee S, 2009, TECHNOVATION, V29, P481, DOI 10.1016/j.technovation.2008.10.006
- Leydesdorff L, 2014, SCIENTOMETRICS, V98, P1583, DOI 10.1007/s11192-012-0923-2
- MacQueen J.B., 1967, P 5 BERK S MATH STAT, V1, P281, DOI DOI 10.1234/12345678
- Martinez C., 2010, OECD SCI TECHNOLOGY
- Martiskainen M, 2011, ENER EFFIC, V4, P209, DOI 10.1007/s12053-010-9094-2
- McKinsey & Company, 2009, PATHW LOW CARB EC VE
- Michel J, 2001, SCIENTOMETRICS, V51, P185, DOI 10.1023/A:1010577030871
- Narin F., 2000, MEASURING STRATEGIC
- Nesta L, 2005, J IND ECON, V53, P123, DOI 10.1111/j.0022-1821.2005.00248.x
- Noailly J, 2010, ENER POLICY, V38, P7803, DOI 10.1016/j.enpol.2010.08.040
- PANZAR JC, 1981, AM ECON REV, V71, P268
- Park H, 2013, SCIENTOMETRICS, V97, P883, DOI 10.1007/s11192-013-1010-z
- Patterson MG, 1996, CONCEPTS INDICATORS, V24, P377, DOI DOI 10.1016/0301-4215(96)00017-1
- Peine A, 2009, TECHNOL FORECAST SOC, V76, P396, DOI 10.1016/j.techfore.2008.04.002
- Polanco X, 2001, SCIENTOMETRICS, V51, P267, DOI 10.1023/A:1010537316758
- Popp D, 2005, ECOL ECON, V54, P209, DOI 10.1016/j.ecolecon.2005.01.001
- Rauber A, 2002, IEEE T NEURAL NETWOR, V13, P1331, DOI 10.1109/TNN.2002.804221
- Rennings K, 2009, FINANC UVER, V59, P442
- Rosenberg N, 2004, J ECON HIST, V64, P61
- Saidur R, 2007, ENER POLICY, V35, P1648, DOI 10.1016/j.enpol.2006.05.006
- SCHERER FM, 1982, RES POLICY, V11, P227, DOI 10.1016/0048-7333(82)90011-7
- Schumpeter J, 1942, CAPITALISM SOCIALISM

Segev A, 2012, EXPERT SYST APPL, V39, P13235, DOI 10.1016/j.eswa.2012.05.078  
 Shane S, 2001, MANAGE SCI, V47, P1173, DOI 10.1287/mnsc.47.9.1173.9785  
 Squicciarini M., 2013, OECD SCI TECHNOLOGY  
 Sternitzke C, 2008, WORLD PAT INF, V30, P115, DOI 10.1016/j.wpi.2007.08.003  
 Tseng YH, 2007, INFORM PROCESS MANAG, V43, P1216, DOI 10.1016/j.ipm.2006.11.011  
 Ultsch A., 1990, P INT NEUR NETW C IN, P305  
 van Eck NJ, 2010, SCIENTOMETRICS, V84, P523, DOI 10.1007/s11192-009-0146-3  
 Van Eck N.J., 2014, MEASURING SCHOLARLY, P285, DOI DOI 10.1007/978-3-319-10377-8\_13  
 Verspagen B., 1997, ECON SYST RES, V9, P47, DOI DOI 10.1080/09535319700000004  
 Verspagen B, 2007, ADV COMPLEX SYST, V10, P93, DOI 10.1142/S0219525907000945  
 Vesanto J., 1999, Intelligent Data Analysis, V3, P111, DOI 10.1016/S1088-467X(99)00013-X  
 Vesanto J., 1999, P MATL DSP C, V99, P16  
 White H. D., 1998, KNOWL ORGAN, V6, P57  
 Yoon B., 2004, J HIGH TECHNOLOGY MA, V15, P37, DOI DOI 10.1016/J.HITECH.2003.09.003  
 Yoon BU, 2002, R&D MANAGE, V32, P291, DOI 10.1111/1467-9310.00261

NR 93

TC 1

Z9 1

U1 6

U2 11

PU SPRINGER

PI DORDRECHT

PA VAN GODEWIJCKSTRAAT 30, 3311 GZ DORDRECHT, NETHERLANDS

SN 1570-646X

EI 1570-6478

J9 ENERG EFFIC

JI Energy Effic.

PD JUN

PY 2017

VL 10

IS 3

BP 693

EP 716

DI 10.1007/s12053-016-9470-7

PG 24

WC GREEN & SUSTAINABLE SCIENCE & TECHNOLOGY; Energy & Fuels; Environmental Studies

SC Science & Technology - Other Topics; Energy & Fuels; Environmental Sciences & Ecology

GA EV4IM

UT WOS:000401722500011

DA 2018-05-03

ER

PT J

AU Hampton, S

AF Hampton, Sam

TI An ethnography of energy demand and working from home: Exploring the affective dimensions of social practice in the United Kingdom

SO ENERGY RESEARCH & SOCIAL SCIENCE

LA English

DT Article

DE Working from home; Energy practices; Affect; Comfort

ID THERMAL COMFORT; ENVIRONMENTAL-POLICY; CONSUMPTION; DEMOGRAPHICS; EXPERIENCE; EMOTIONS; TELEWORK; IMPACTS; DENMARK; PEOPLE

AB The practice of working from home has become widespread in developed countries, and the numbers of regular home workers are steadily increasing. There are potentially positive implications for energy consumption associated with home working, but these depend on myriad variables. This qualitative study,

based on interviews with regular home workers, provides a more in-depth perspective on how and why energy is used compared with quantitative models of household consumption. Ethnographic research data is analysed using insights from practice theory. Placing the practice at the heart of analysis, it explores meanings, materials and competences involved in home working, and attends to the affective experiences of practitioners. Considering working from home as an integrative practice, it explores how dispersed practices are incorporated into individual performances, bringing about affective satisfaction. Findings show that the practice of working from home is characterised by themes of comfort, control and flexibility, with implications for energy demand. It is argued that the synthesis of practice theory and affect can provide valuable insights for energy research. The paper discusses the implications for demand reduction, demand shifting and 'smart' controls, with reference to the role of employers, researchers, policy makers and home workers themselves.

- C1 [Hampton, Sam] Univ Oxford, Ctr Environm, Environm Change Inst, South Parks Rd, Oxford OX1 3QY, England.
- RP Hampton, S (reprint author), Univ Oxford, Ctr Environm, Environm Change Inst, South Parks Rd, Oxford OX1 3QY, England.
- EM samuel.hampton@ouce.ox.ac.uk
- OI Hampton, Sam/0000-0003-0596-9710
- FU UK Energy Research Centre; Economic and Social Research Council
- FX This research was funded by the UK Energy Research Centre and the Economic and Social Research Council.
- CR Anderson AJ, 2015, EUR J WORK ORGAN PSY, V24, P882, DOI 10.1080/1359432X.2014.966086
- Anderson B, 2009, EMOT SPACE SOC, V2, P77, DOI DOI 10.1016/J.EMOSPA.2009.08.005
- Banister D., 2007, ROLE TELEWORKING RED
- Bell S, 2015, ENERGY RES SOC SCI, V9, P98, DOI 10.1016/j.erss.2015.08.027
- Bonnington O, 2015, J CRIT REALISM, V14, P461, DOI 10.1179/1572513815Y.0000000009
- Bryman A., 2012, SOCIAL RES METHODS
- Cass N., 2015, MOBILITIES, P1
- Cass N, 2016, TRANSPORT POLICY, V45, P1, DOI 10.1016/j.tranpol.2015.08.002
- Cresswell T, 2012, ENVIRON PLANN D, V30, P96, DOI 10.1068/d494
- Crosbie T, 2008, INT J ENVIRON TECHNO, V9, P220, DOI 10.1504/IJETM.2008.019035
- Cunliffe A, 2012, HUM RELAT, V65, P63, DOI 10.1177/0018726711424321
- Darby S, 2006, EFFECTIVENESS FEEDBA
- Darby S.J., 2015, SMART METERING PALLY
- DECC, 2015, SMART EN SYST
- de Dear R. J., 1997, ASHRAE T, V104
- Ellsworth-Krebs K, 2015, ENERGY RES SOC SCI, V6, P100, DOI 10.1016/j.erss.2014.12.003
- Fanger O., 1970, THERMAL COMFORT ANAL
- Flyvbjerg B, 2001, MAKING SOCIAL SCI MA
- Friis F, 2016, ENERGY RES SOC SCI, V19, P124, DOI 10.1016/j.erss.2016.05.017
- Fu M, 2012, ENER POLICY, V47, P416, DOI 10.1016/j.enpol.2012.05.014
- Gabriel M, 2013, HOUS THEORY SOC, V30, P219, DOI 10.1080/14036096.2013.775183
- Garabuau-Moussaoui I., 2014, EOPLE WORK LIVE ENER
- Garner C., 2016, WORKING ANYWHERE WIN
- Gram-Hanssen K, 2010, BUILD RES INF, V38, P175, DOI 10.1080/09613210903541527
- Gram-Hanssen K, 2010, J IND ECOL, V14, P150, DOI 10.1111/j.1530-9290.2009.00194.x
- Grunewald P., 2016, FLEXIBILITY SUPPLY D
- GWA, 2016, LAT TEL STAT GLOB W
- Healy S, 2008, BUILD RES INF, V36, P312, DOI 10.1080/09613210802076351
- Higginson S, 2015, INDOOR BUILT ENVIRON, V24, P950, DOI 10.1177/1420326X15603439
- Hitchings R, 2012, AREA, V44, P61, DOI 10.1111/j.1475-4762.2011.01060.x
- Huebner GM, 2016, ENERGY RES SOC SCI, V15, P45, DOI 10.1016/j.erss.2016.02.008
- Janda KB, 2014, ENER POLICY, V67, P48, DOI 10.1016/j.enpol.2013.08.058
- Kitou E, 2003, ENVIRON SCI TECHNOL, V37, P3467, DOI 10.1021/es025849p
- Latham A, 2009, AREA, V41, P252, DOI 10.1111/j.1475-4762.2008.00868.x
- Lopes MAR, 2015, ENERGY RES SOC SCI, V7, P84, DOI 10.1016/j.erss.2015.03.004
- Luo MH, 2016, ENER BUILDINGS, V111, P56, DOI 10.1016/j.enbuild.2015.11.004
- Mann S, 2003, NEW TECH WORK EMPLOY, V18, P196, DOI 10.1111/1468-005X.00121
- Mason CM, 2011, REG STUD, V45, P625, DOI 10.1080/00343401003614241



- Massumi Brian, 2002, PARABLES VIRTUAL MOV
- McCormack DP, 2003, T I BRIT GEOGR, V28, P488, DOI 10.1111/j.0020-2754.2003.00106.x
- Miyoshi C, 2015, TRANSPORT RES D-TR E, V35, P23, DOI 10.1016/j.trd.2014.11.016
- MOKHTARIAN PL, 1995, TRANSPORT RES A-POL, V29, P283, DOI 10.1016/0965-8564(94)00029-A
- Nelson P, 2007, TRANSPORT RES D-TR E, V12, P195, DOI 10.1016/j.trd.2007.01.011
- Nicol JF, 2002, ENERG BUILDINGS, V34, P563, DOI 10.1016/S0378-7788(02)00006-3
- Nyborg S, 2015, ENERGY RES SOC SCI, V9, P166, DOI 10.1016/j.erss.2015.08.021
- ONS, 2014, QUART LAB FORC SURV
- ONS, 2014, CHAR HOM WORK
- Parag Y, 2014, ENERGY RES SOC SCI, V3, P102, DOI 10.1016/j.erss.2014.07.011
- Pile S, 2010, T I BRIT GEOGR, V35, P5, DOI 10.1111/j.1475-5661.2009.00368.x
- Powells G., 2015, ENERG EFFIC, P1
- Reaney P., 2012, ONE 5 WORKERS WORKER
- Reckwitz A., 2002, EUR J SOC THEORY, V5, P243, DOI [10.1177/13684310222225432, DOI 10.1177/13684310222225432]
- Reckwitz A, 2012, RETHINK HIST, V16, P241, DOI 10.1080/13642529.2012.681193
- Rietveld P, 2011, ENVIRON INNOV SOC TR, V1, P146, DOI 10.1016/j.eist.2011.03.002
- Royston S, 2014, ENERGY RES SOC SCI, V2, P148, DOI 10.1016/j.erss.2014.04.016
- Schatzki T., 1996, SOCIAL PRACTICES WIT
- Schatzki Theodore R., 2010, SITE SOCIAL PHILOS A
- Schatzki Theodore R, 2001, PRACTICE TURN CONT T, P1, DOI DOI 10.1080/01580370701628474
- Sdei A, 2015, ENERGY RES SOC SCI, V10, P62, DOI 10.1016/j.erss.2015.07.001
- Shipworth M, 2010, BUILD RES INF, V38, P50, DOI 10.1080/09613210903263007
- Shove E., 2005, Journal of Consumer Culture, V5, P43, DOI 10.1177/1469540505049846
- Shove E, 2003, J CONSUM POLICY, V26, P395, DOI DOI 10.1023/A:1026362829781
- Shove E., 2012, DYNAMICS SOCIAL PRAC
- Shove E, 2014, THEOR CULT SOC, V31, P41, DOI 10.1177/0263276414536746
- Shove E, 2007, HUM AFF, V17, P154, DOI 10.2478/v10023-007-0014-9
- Shove E, 2010, ENVIRON PLANN A, V42, P1273, DOI 10.1068/a42282
- Southerton D., PRACTICE MAT CULTURE
- Spurling N., 2015, INTERVENTIONS PRACTI
- Stern PC, 2014, ENERGY RES SOC SCI, V1, P41, DOI 10.1016/j.erss.2014.03.003
- Stewart K, 2011, ENVIRON PLANN D, V29, P445, DOI 10.1068/d9109
- Strengers Y, 2010, ENERG POLICY, V38, P7312, DOI 10.1016/j.enpol.2010.08.006
- Tomkins S. S, 1962, AFFECT IMAGERY CONSC, V1
- Valdorff-Madsen L., 2014, 2 EN SOC C KRAK POL
- Vannini P, 2014, BODY SOC, V20, P61, DOI 10.1177/1357034X13499381
- Walker G, 2014, ENERGY RES SOC SCI, V1, P49, DOI 10.1016/j.erss.2014.03.012
- Walker SL, 2014, ENERGY RES SOC SCI, V2, P102, DOI 10.1016/j.erss.2014.04.004
- Wallenborn G, 2014, ENERGY RES SOC SCI, V1, P56, DOI 10.1016/j.erss.2014.03.009
- Walls M. A., 2004, REV LIT TELECOMMUTIN
- Warde A, 2005, J CONSUM CULT, V5, P131, DOI DOI 10.1177/1469540505053090
- Welz C, 2010, TELEWORK EUROPEAN UN
- Wilhite H, 1999, ADV CONSUM RES, V26, P281
- World Resources Institute, 2013, GHG PROT CORP VAL CH
- Zhang H, 2015, BUILD ENVIRON, V91, P15, DOI 10.1016/j.buildenv.2015.03.013
- NR 83
- TC 1
- Z9 1
- U1 5
- U2 7
- PU ELSEVIER SCIENCE BV
- PI AMSTERDAM
- PA PO BOX 211, 1000 AE AMSTERDAM, NETHERLANDS
- SN 2214-6296
- EI 2214-6326
- J9 ENERGY RES SOC SCI
- J1 Energy Res. Soc. Sci.

PD JUN  
 PY 2017  
 VL 28  
 BP 1  
 EP 10  
 DI 10.1016/j.erss.2017.03.012  
 PG 10  
 WC Environmental Studies  
 SC Environmental Sciences & Ecology  
 GA FA8VW  
 UT WOS:000405725500001  
 OA gold  
 DA 2018-05-03  
 ER

PT J

AU Siebert, LC

Sbicca, A

Aoki, AR

Lambert-Torres, G

AF Siebert, Luciano C.

Sbicca, Adriana

Aoki, Alexandre Rasi

Lambert-Torres, Germano

TI A Behavioral Economics Approach to Residential Electricity Consumption

SO ENERGIES

LA English

DT Article

DE agent-based modeling; complex systems; consumer behavior; economics;  
 demand-side management; smart grids

ID DECISION-MAKING; POWER-SYSTEM; TECHNOLOGIES; REDUCTION; DEMAND; MODELS;  
 GRIDS

AB Consumer behavior is complex and is difficult to represent in traditional economic theories of decision-making. This paper focuses on the development of an agent-based approach to analyze people's behavior in consuming electricity using a behavioral economics framework, where the consumer is the main agent of power systems. This approach may bring useful insights for distribution companies and regulatory agencies, helping to shift thinking to a more user-centric approach. The emergent properties of electricity consumption are modeled by the means of consumer's heuristics, taking into account the electricity price, consumer's satisfaction level, willingness to invest in new technologies, social interactions, and marketing strategies by the power utility. Analysis on the emergent behavior of this approach through simulation studies showed that it is indeed valuable, as does not require in-depth data of all details on human behavior. However, it contributes to the understanding of relations among various objects involved in electricity consumption.

C1 [Siebert, Luciano C.; Aoki, Alexandre Rasi] Lactec Inst, Dept Elect & Mat, BR-81530180 Curitiba, Parana, Brazil.

[Siebert, Luciano C.; Aoki, Alexandre Rasi] Univ Fed Parana, Dept Elect Engr, BR-82590300 Curitiba, Parana, Brazil.

[Sbicca, Adriana] Univ Fed Parana, Dept Econ, BR-80210170 Curitiba, Parana, Brazil.

[Lambert-Torres, Germano] Gnarus Inst, BR-37500052 Itajuba, Brazil.

RP Lambert-Torres, G (reprint author), Gnarus Inst, BR-37500052 Itajuba, Brazil.

EM aoki@lactec.org.br; adsbicca@yahoo.com; aoki@lactec.org.br;  
 germanoltorres@gmail.com

OI Lambert-Torres, Germano/0000-0003-3789-4696

FU National Council for Scientific and Technological Development (CNPq);  
 Coordination for the Improvement of Higher Education Personnel (CAPES);  
 Brazilian Electricity Regulatory Agency Research and Development (ANEEL  
 RD)

FX The authors would like to thank the National Council for Scientific and

- Technological Development (CNPq), Coordination for the Improvement of Higher Education Personnel (CAPES) and Brazilian Electricity Regulatory Agency Research and Development (ANEEL R&D) for supporting this project.
- CR Arango HG, 2016, ADV ELECTR COMPUT EN, V16, P65, DOI 10.4316/AECE.2016.03010
- Ardito L, 2013, ENERGIES, V6, P251, DOI 10.3390/en6010251
- Bai H, 2015, ENERGIES, V8, P2268, DOI 10.3390/en8032268
- Bompard E., 2012, SMART ENERGY GRIDS C
- Cannistraro G, 2016, INT J HEAT TECHNOL, V34, pS332, DOI 10.18280/ijht.34S220
- Cannistraro G, 2015, INT J HEAT TECHNOL, V33, P167, DOI 10.18280/ijht.330421
- Cannistraro G, 2016, INT J HEAT TECHNOL, V34, P498, DOI 10.18280/ijht.340321
- Cannistraro G, 2015, INT J HEAT TECHNOL, V33, P115, DOI 10.18280/ijht.330116
- Cannistraro M, 2016, INT J HEAT TECHNOL, V34, P551, DOI 10.18280/ijht.340401
- da Silva Filho J. I, 2010, UNCERTAINTY TREATMEN, DOI [10.3233/978-1-60750-558-7-i, DOI 10.3233/978-1-60750-558-7-I]
- Dehghanian P, 2016, IEEE T SMART GRID, V7, P2071, DOI 10.1109/TSG.2016.2544794
- Erdinc O, 2017, IEEE T SMART GRID, V8, P362, DOI 10.1109/TSG.2016.2556619
- Frederiks ER, 2015, RENEW SUST ENERG REV, V41, P1385, DOI 10.1016/j.rser.2014.09.026
- GELLINGS CW, 1985, P IEEE, V73, P1468, DOI 10.1109/PROC.1985.13318
- Gellings C. W., 2015, SMART GRID PLANNING
- Gomez-Sanz JJ, 2014, ENERGIES, V7, P3355, DOI 10.3390/en7053355
- Gonzatti RB, 2016, IEEE T SMART GRID, V7, P837, DOI 10.1109/TSG.2015.2466613
- Grimm V, 2006, ECOL MODEL, V198, P115, DOI 10.1016/j.ecolmodel.2006.04.023
- Guerard G, 2012, FRONT ARTIF INTEL AP, V243, P788, DOI 10.3233/978-1-61499-105-2-788
- Ida T, CAN SMART GRID SAVE
- International Energy Agency, 2003, POW CHOOS DEM RESP L
- Kangur A, 2017, J ENVIRON PSYCHOL, V52, P166, DOI 10.1016/j.jenvp.2017.01.002
- KATONA G, 1953, PSYCHOL REV, V60, P307, DOI 10.1037/h0060640
- Kirschen DS, 2000, IEEE T POWER SYST, V15, P612, DOI 10.1109/59.867149
- Kremers E., 2012, MODELLING SIMULATION
- Lambert-Torres G., 2009, ADV TECHNOLOGICAL AP
- Lee T, 2014, ENERG POLICY, V66, P267, DOI 10.1016/j.enpol.2013.11.004
- Lee T, 2013, ENERG POLICY, V52, P363, DOI 10.1016/j.enpol.2012.09.048
- Lopes AJ, 2011, PROCEDIA COMPUT SCI, V6, DOI 10.1016/j.procs.2011.08.083
- Marvasti AK, 2014, IEEE T SMART GRID, V5, P1228, DOI 10.1109/TSG.2013.2282867
- Mazidi P, 2017, ENERGIES, V10, DOI 10.3390/en10030313
- Momoh James, 2012, SMART GRID FUNDAMENT
- Nam SR, 2013, ENERGIES, V6, P3692, DOI 10.3390/en6083692
- Nekooei K, 2013, IEEE T SMART GRID, V4, P557, DOI 10.1109/TSG.2012.2237420
- Paiva G. F. S., 2013, P IARIW IBGE C INC W
- Poghosyan A, 2015, APPL ENERG, V157, P699, DOI 10.1016/j.apenergy.2015.02.069
- Pollitt M. G., 2011, CAMB WORK PAP EC, V1165, P31
- Sbicca A., 2010, HEURISTICS CONSUMER
- SIMON HA, 1959, AM ECON REV, V49, P253
- SIMON HA, 1979, AM ECON REV, V69, P493
- Simon H. A, 1996, SCI ARTIFICIAL
- Simon HA, 1955, Q J ECON, V69, P99, DOI 10.2307/1884852
- Soares J, 2013, IEEE T SMART GRID, V4, P596, DOI 10.1109/TSG.2012.2235865
- Sullivan D., 2012, P 17 BIENN 2012 ACEE, P284
- Talari S, 2017, ENERGIES, V10, DOI 10.3390/en10040421
- Tesfatsion L, 2006, HANDB ECON, V13, P831
- Tsvetanov T, 2013, J ENVIRON ECON MANAG, V66, P347, DOI 10.1016/j.jeem.2013.04.006
- TVERSKY A, 1974, SCIENCE, V185, P1124, DOI 10.1126/science.185.4157.1124
- Venayagamoorthy GK, 2011, IEEE COMPUT INTELL M, V6, P22, DOI 10.1109/MCI.2011.941588
- Yin H., 2016, IEEE T TRANSPORT ELE, P1, DOI DOI 10.1109/TTE.2016.2552721

NR 50

TC 1

Z9 1

U1 9

U2 16  
PU MDPI AG  
PI BASEL  
PA ST ALBAN-ANLAGE 66, CH-4052 BASEL, SWITZERLAND  
SN 1996-1073  
J9 ENERGIES  
JI Energies  
PD JUN  
PY 2017  
VL 10  
IS 6  
AR 768  
DI 10.3390/en10060768  
PG 18  
WC Energy & Fuels  
SC Energy & Fuels  
GA EZ0HT  
UT WOS:000404384000034  
OA gold  
DA 2018-05-03  
ER

PT J

AU Reyna, JL  
Chester, MV

AF Reyna, Janet L.  
Chester, Mikhail V.

TI Energy efficiency to reduce residential electricity and natural gas use  
under climate change

SO NATURE COMMUNICATIONS

LA English

DT Article

ID BOTTOM-UP APPROACH; BUILDING STOCK; UNITED-STATES; CONSUMPTION; DEMAND;  
MODELS; SECTOR; SCENARIOS; IMPACTS; POLICY

AB Climate change could significantly affect consumer demand for energy in buildings, as changing temperatures may alter heating and cooling loads. Warming climates could also lead to the increased adoption and use of cooling technologies in buildings. We assess residential electricity and natural gas demand in Los Angeles, California under multiple climate change projections and investigate the potential for energy efficiency to offset increased demand. We calibrate residential energy use against metered data, accounting for differences in building materials and appliances. Under temperature increases, we find that without policy intervention, residential electricity demand could increase by as much as 41-87% between 2020 and 2060. However, aggressive policies aimed at upgrading heating/cooling systems and appliances could result in electricity use increases as low as 28%, potentially avoiding the installation of new generation capacity. We therefore recommend aggressive energy efficiency, in combination with low-carbon generation sources, to offset projected increases in residential energy demand.

C1 [Reyna, Janet L.; Chester, Mikhail V.] Arizona State Univ, Civil Environm & Sustainable Engn, 660 S Coll Ave, Tempe, AZ 85281 USA.

RP Reyna, JL (reprint author), Arizona State Univ, Civil Environm & Sustainable Engn, 660 S Coll Ave, Tempe, AZ 85281 USA.

EM janet.reyna@ee.doe.gov

OI Reyna, Janet/0000-0003-3336-2879

FU National Science Foundation [GRFP-DGE 1311230, SRN 1444755, WSC 1360509, IMEE 1335556, 1335640]; Department of Energy (DOE) Office of Energy Efficiency and Renewable Energy Science and Technology Policy Fellowships; DOE [DE-SC0014664]

FX This material is based upon work supported by several National Science Foundation grants (GRFP-DGE 1311230, SRN 1444755, WSC 1360509 and IMEE 1335556 and 1335640). This research was supported in part by an award

from the Department of Energy (DOE) Office of Energy Efficiency and Renewable Energy Science and Technology Policy Fellowships administered by the Oak Ridge Institute for Science and Education (ORISE) for the DOE. ORISE is managed by ORAU under DOE contract number DE-SC0014664. Any opinion, findings and conclusions or recommendations expressed in this material are those of the authors and do not necessarily reflect the views of the National Science Foundation. All opinions expressed in this paper are the author's and do not necessarily reflect the policies and views of DOE, ORAU or ORISE.

- CR Akbari H., 1993, LBL34263
- Bartos M, 2016, ENVIRON RES LETT, V11, DOI 10.1088/1748-9326/11/11/114008
- Bartos MD, 2015, NAT CLIM CHANGE, V5, P748, DOI [10.1038/nclimate2648, 10.1038/NCLIMATE2648]
- Belcher SE, 2005, BUILD SERV ENG RES T, V1, P49, DOI DOI 10.1191/0143624405BT112OA
- Billingsley M. a., 2014, LBNL6595E
- Broin EO, 2013, ENERGY, V57, P134, DOI 10.1016/j.energy.2013.01.016
- Brown R. E., 2008, LBNL1096E
- California Department of Finance, NEW POP PROJ CAL SUR
- California Energy Commission, 2016, EL CONS COUNT
- California Independent System Operator, 2012, WHAT DUCK CURV TELLS
- Carlo J. C., 2003, 8 INT IBPSA C EINDH
- Davis LW, 2015, P NATL ACAD SCI USA, V112, P5962, DOI 10.1073/pnas.1423558112
- DiMascio M., 2015, AM COUNCIL ENERGY EF
- Dirks JA, 2015, ENERGY, V79, P20, DOI 10.1016/j.energy.2014.08.081
- Esteves GRT, 2015, PROCEDIA COMPUT SCI, V55, P549, DOI 10.1016/j.procs.2015.07.041
- Ghedamsi R, 2016, ENERGBUILDINGS, V121, P309, DOI 10.1016/j.enbuild.2015.12.030
- Gillingham K, 2016, REV ENV ECON POLICY, V10, P68, DOI 10.1093/reep/rev017
- Gillingham K, 2013, NATURE, V493, P475, DOI 10.1038/493475a
- Gorin T., 2015, PLUG LOADS RESIDENTI
- Gouveia JP, 2012, ENERGY, V47, P430, DOI 10.1016/j.energy.2012.09.042
- Gyamfi S, 2012, ELECTR POW SYST RES, V93, P32, DOI 10.1016/j.epsr.2012.07.004
- Hijioka Y., 2008, J GLOBAL ENV ENG, V13, P97
- Hsu D, 2015, ENERGY, V83, P144, DOI 10.1016/j.energy.2015.02.008
- Huang J., 1999, LBL37208
- Huang J., 1991, LBL29798
- Iowa Environmental Mesonet, 2015, AUT SURF OBS SYST HI
- Pachauri R. K., 2014, CLIMATE CHANGE 2014
- Jones P, 2007, LANDSCAPE URBAN PLAN, V83, P39, DOI 10.1016/j.landurbplan.2007.05.015
- Kavgic M, 2010, BUILD ENVIRON, V45, P1683, DOI 10.1016/j.buildenv.2010.01.021
- KEMA Inc., 2009, CEC2002010004 KEMA
- Los Angeles County Assessor Office, 2009, ANG COUNT DAT
- Lu XS, 2015, APPL ENER, V144, P261, DOI 10.1016/j.apenergy.2014.12.019
- McCullum D, 2012, ENERGY STRATEG REV, V1, P19, DOI 10.1016/j.esr.2011.12.003
- Molina M., 2014, BEST VALUE AM ENERGY
- Morrison GM, 2015, CLIMATIC CHANGE, V131, P545, DOI 10.1007/s10584-015-1403-5
- Navigant Consulting Inc, 2014, DOEEE113
- Opitz MW, 1997, ENERGBUILDINGS, V25, P75, DOI 10.1016/S0378-7788(96)00995-4
- Pierce DW, 2014, J HYDROMETEOROL, V15, P2558, DOI 10.1175/JHM-D-14-0082.1
- Pincetl S, 2016, J IND ECOL, V20, P166, DOI 10.1111/jiec.12299
- Puksec T, 2014, ENERGY, V76, P198, DOI 10.1016/j.energy.2014.06.045
- Puksec T, 2013, APPL ENER, V101, P15, DOI 10.1016/j.apenergy.2012.04.023
- Reyna JL, 2015, J IND ECOL, V19, P524, DOI 10.1111/jiec.12211
- Riahi K, 2007, TECHNOL FORECAST SOC, V74, P887, DOI 10.1016/j.techfore.2006.05.026
- Sailor DJ, 2014, BUILD ENVIRON, V78, P81, DOI 10.1016/j.buildenv.2014.04.012
- Sailor DJ, 2003, ENERGY, V28, P941, DOI 10.1016/S0360-5442(03)00033-1
- Sanford T, 2014, NAT CLIM CHANGE, V4, P164, DOI 10.1038/nclimate2148
- Sathaye J., 2012, CEC5002012057
- Sezgen O., 1995, LBL37065
- Shimoda Y, 2004, BUILD ENVIRON, V39, P959, DOI 10.1016/j.buildenv.2004.01.020

Swan LG, 2009, RENEW SUST ENERG REV, V13, P1819, DOI 10.1016/j.rser.2008.09.033  
 U. S. Census Bureau, 2010, QUICKFACTS  
 U. S. Department of the Interior & Bureau of Reclamation, 2013, DOWNSC CMIP3 CMIP5 C  
 US DOE, 2011, BUILD EN DAT BOOK  
 U.S. Department of Energy, 2013, NEW EN EFF STAND MIC  
 U. S. Department of Energy, 2015, BUILD EN DAT BOOK  
 U. S. Energy Information Administration, 2015, ELECT POWER MONTHLY  
 U.S. Energy Information Administration, 2014, TOD IN EN  
 van Vliet MTH, 2016, NAT CLIM CHANGE, V6, P375, DOI [10.1038/nclimate2903,  
 10.1038/NCLIMATE2903]  
 van Vuuren DP, 2007, CLIMATIC CHANGE, V81, P119, DOI 10.1007/s10584-006-9172-9  
 Verinnovation Inc, 2012, 12234 NW EN EFF ALL  
 Wang HJ, 2014, ENERG BUILDINGS, V82, P428, DOI 10.1016/j.enbuild.2014.07.034  
 Wang Z, 2015, ENERG BUILDINGS, V109, P65, DOI 10.1016/j.enbuild.2015.09.057  
 Wiesmann D, 2011, ENERG POLICY, V39, P2772, DOI 10.1016/j.enpol.2011.02.047  
 Wise M, 2009, SCIENCE, V324, P1183, DOI 10.1126/science.1168475  
 Yamaguchi Y, 2007, ENERG BUILDINGS, V39, P580, DOI 10.1016/j.enbuild.2006.09.011

NR 65

TC 1

Z9 1

U1 2

U2 7

PU NATURE PUBLISHING GROUP

PI LONDON

PA MACMILLAN BUILDING, 4 CRINAN ST, LONDON N1 9XW, ENGLAND

SN 2041-1723

J9 NAT COMMUN

JI Nat. Commun.

PD MAY 15

PY 2017

VL 8

AR 14916

DI 10.1038/ncomms14916

PG 12

WC Multidisciplinary Sciences

SC Science & Technology - Other Topics

GA EU8FN

UT WOS:000401273600001

PM 28504255

OA gold

DA 2018-05-03

ER

PT J

AU Chayaamor-Heil, N

Hannachi-Belkadi, N

AF Chayaamor-Heil, Natasha

Hannachi-Belkadi, Nazila

TI Towards a Platform of Investigative Tools for Biomimicry as a New

Approach for Energy-Efficient Building Design

SO BUILDINGS

LA English

DT Article

DE biomimicry; architectural design; energy efficiency; sustainability;

data analysis; Bayesian network

AB Major problems worldwide are environmental concern and energy shortage along with the high consumption of energy in buildings and the lack of sources. Buildings are the most intensive energy consumers, and account for 40% of worldwide energy use, which is much more than transportation. In

next 25 years, CO<sub>2</sub> emissions from buildings are projected to grow faster than in other sectors. Thus, architects must attempt to find solutions for managing buildings energy consumption. One of new innovative approaches is Biomimicry, which is defined as the applied science that derives inspiration for solutions to human problems through the study of natural designs' principles. Although biomimicry is considered to be a new approach for achieving sustainable architecture, but there is still not enough access for architects to make use of it, especially to implement biomimetic design strategy in architectural project. The main objective of this paper is to raise awareness of architects making use of biomimetic strategies with better accessible facility. We propose to create the tool setting relationship to formalize and bridge between biological and architectural knowledge, along with investigative tools to investigate the ability of reducing energy consumption by applying the biomimetic strategies on efficient-energy building design. This article hypothetically proposes an investigative tool based on Bayesian networks for testing the rapid result of choices from natural devices according to specific multi-criteria requirements in each case study.

C1 [Chayaamor-Heil, Natasha; Hannachi-Belkadi, Nazila] ENSA PARIS La Villette, CNRS MCC UMR 3495, MAP Maacc, F-75 Paris, France.

RP Chayaamor-Heil, N (reprint author), ENSA PARIS La Villette, CNRS MCC UMR 3495, MAP Maacc, F-75 Paris, France.

EM natasha.heil@outlook.com; nhannach@paris-lavillette.archi.fr

OI Heil, Natasha/0000-0002-5582-5988

CR Abdelmalek S. M., 2003, THESIS

Allard O., 2012, COMMENT ENTREPRISES

Altshuller G., 1999, INNOVATION ALGORITHM

Aslam A., 2012, P 2 C PEOP L BUILD LO

Benyus M.J., 1998, BIOMIMICRY INNOVATIO

Brisepierre G., 2013, PRATIQUE CONSOMMATIO

Chiche P., 2009, ARCHITECTURE CONCEPT

Chu S., 2012, NATURE, V488, P294, DOI 10.1038/nature11475

Cohen Y. H., 2016, BIOMIMETIC DESIGN ME

Darwiche A., 2009, MODELING AND REASONING WITH BAYESIAN NETWORKS, P1, DOI 10.1017/CBO9780511811357

Del Grosso AE, 2010, SMART MATER STRUCT, V19, DOI 10.1088/0964-1726/19/12/124011

Environnement Canada, 2012, PART AV CANM ENERGIE

Fu K., 2014, J MECH DESIGN, V136, DOI 10.1115/1.4028289

Gruber P., 2011, BIOL MED PHYS BIOMED, P1, DOI 10.1007/978-3-642-11934-7

Hannachi-Belkadi N., 2007, P SUST BUILD 2007 C

Hannachi-Belkadi N., 2016, P 8 JOURN FRANC RES

Houssin D., 2013, TRASITION SUSTAINABL

Huygen Jean-Marc, 2008, POUBELLE ARCHITECTE

Hyde R., 2015, ARCHIT SCI REV, V58, P103, DOI 10.1080/00038628.2015.1016688

Klen O., 2008, BASIC CLIMATISATION

Lechner N., 2009, HEATING COOLING LIGH

Liebard A., 2005, TRAITE ARCHITECTURE

Maturana H. R., 1980, BIOL COGNITION AUTOP, P5

Mazzoleni I., 2013, ARCHITECTURE FOLLOWS

Braungart M., 2002, CORPORATE ENV STRATE, V9, P251, DOI DOI 10.1016/S1066-7938(02)00069-6

Micheal P., 2011, BIOMIMICRY ARCHITECT

Nessim M. A., 2006, THESIS

Radwan A. N., 2016, PROCEDIA ENV SCI, V34, P178, DOI [10.1016/j.proenv.2016.04.017, DOI 10.1016/J.PROENV.2016.04.017]

Ramesh T., 2010, ENERG BUILDINGS, V42, P1592, DOI 10.1016/j.enbuild.2010.05.007

Schafer I., 2013, ADV SCI TECH, V84, P51, DOI 10.4028/www.scientific.net/AST.84.51

Schmitt OH, 1969, P 3 INT BIOPH C BOST, P297

Sozer H., 2013, TECHNOLOGY ROADMAP E

Vincent JFV, 2006, J R SOC INTERFACE, V3, P471, DOI 10.1098/rsif.2006.0127

NR 33

TC 1

Z9 1

U1 6

U2 10

PU MDPI AG  
 PI BASEL  
 PA ST ALBAN-ANLAGE 66, CH-4052 BASEL, SWITZERLAND  
 SN 2075-5309  
 J9 BUILDINGS  
 JI Buildings  
 PD MAR  
 PY 2017  
 VL 7  
 IS 1  
 AR 19  
 DI 10.3390/buildings7010019  
 PG 18  
 WC Construction & Building Technology  
 SC Construction & Building Technology  
 GA ER3IZ  
 UT WOS:000398691800018  
 OA gold  
 DA 2018-05-03  
 ER

PT J  
 AU Alemi, P  
     Loge, F  
 AF Alemi, Payman  
     Loge, Frank  
 TI Energy efficiency measures in affordable zero net energy housing: A case  
    study of the UC Davis 2015 Solar Decathlon home  
 SO RENEWABLE ENERGY  
 LA English  
 DT Article  
 DE Residential housing; Energy modeling; Zero net energy; Energy efficiency  
 ID CLEAR SKIES

AB The 2015 UC Davis Solar Decathlon Team designed and constructed an affordable zero net energy prototype home for California (CA) farmworkers. The prototype was modeled with BEopt and Microsoft Excel (R) for year-round operation under the Davis, CA climate. Each major energy-efficient feature of the home was separately analyzed to gauge its energy savings impact. The construction strategy of in-line framing, low window to wall ratio, and thermal mass in the floor, annually saved 810 kWh in space conditioning. The appliance scoring methodology evaluated appliances based on water efficiency, energy efficiency, and affordability—this methodology led to the adoption of appliances that yielded an annual energy savings exceeding 400 kWh. A graywater heat recovery system selected for the project, the Nexus, saved roughly 3500 kWh annually of electricity compared to an electric resistance water heater. The combined radiant/night sky system reduced the space conditioning energy of the home by nearly 1400 kWh. Over a full year, the UC Davis Solar Decathlon home is anticipated to be 12.9% net energy positive and consume 43.8% less energy than a conventional home, with the same floor plan, exposed to the Davis climate. (C) 2016 Elsevier Ltd. All rights reserved.

C1 [Alemi, Payman; Loge, Frank] Univ Calif Davis, Dept Civil & Environm Engn, Davis, CA 95616 USA.

RP Loge, F (reprint author), Univ Calif Davis, Dept Civil & Environm Engn, Davis, CA 95616 USA.

EM fjloge@ucdavis.edu

FU UC Davis; Amramp; Armstrong; AUS Decking, Inc.; AutoDesk; Bluebeam;  
 Bosch; Brown Construction; Building Materials and Construction Services;  
 Center for Information Technology Research in the Interest of Society;  
 Daikin; Davis Energy Group; Fastenal; Gudgel Yancey Roofing Inc.;  
 Heising-Simons Foundation; Honda; Integrated Comfort; JamesHardie; Nexus  
 eWater; Pacific Gas and Electric; Simpson Strong-Tie; SnapNrack PV  
 Mounting Systems; Sunbelt Rentals; SunPower; Tandem Properties; UC Davis  
 Office of the Provost and Executive Vice Chancellor; UC Davis College of  
 Agricultural and Environmental Sciences; UC Davis College of



Engineering; UC Davis Division of Humanities, Arts, and Cultural Studies; UC Davis Division of Social Sciences; UC Davis Energy Efficiency Center; UC Davis Energy Institute; UC Davis Office of Graduate Studies; UC Davis Student Affairs; UC Davis Undergraduate Education; UC Davis Utilities; U.S. Department of Energy; Viega; Visions Paint Recycling; Weyerhaeuser

FX We are extremely grateful to all of the students, faculty, staff, and mentors who spent time and energy designing and constructing the Aggie Sol Home. We would like to thank UC Davis for all of its financial and infrastructural support. We also would like to express gratitude to all of the organizations that donated their valuable time, money, and resources to supporting our project:: Organization Name; Amramp; Armstrong; AUS Decking, Inc.; AutoDesk; Bluebeam; Bosch; Brown Construction; Building Materials and Construction Services; Center for Information Technology Research in the Interest of Society; Daikin; Davis Energy Group; Fastenal; Gudgel Yancey Roofing Inc.; Heising-Simons Foundation; Honda; Integrated Comfort; JamesHardie; Nexus eWater; Pacific Gas and Electric; Simpson Strong-Tie; SnapNrack PV Mounting Systems; Sunbelt Rentals; SunPower; Tandem Properties; UC Davis Office of the Provost and Executive Vice Chancellor; UC Davis College of Agricultural and Environmental Sciences; UC Davis College of Engineering; UC Davis Division of Humanities, Arts, and Cultural Studies; UC Davis Division of Social Sciences; UC Davis Energy Efficiency Center; UC Davis Energy Institute; UC Davis Office of Graduate Studies; UC Davis Student Affairs; UC Davis Undergraduate Education; UC Davis Utilities; U.S. Department of Energy; Viega; Visions Paint Recycling; Weyerhaeuser

CR Alemi P., 2015, COMMUNICATION

Andrews J., 2001, BETTER DUCT SYSTEMS

[Anonymous], 2013, RAD COOL DES MAN

[Anonymous], 2012, E 2 SER CIRC E 12 2

Athienitis AK, 2000, SOL ENERGY, V69, P229, DOI 10.1016/S0038-092X(00)00052-9

BERDAHL P, 1984, SOL ENERGY, V32, P663, DOI 10.1016/0038-092X(84)90144-0

BERDAHL P, 1982, SOL ENERGY, V29, P299, DOI 10.1016/0038-092X(82)90245-6

Bourne R., 2015, NIGHT SKY COOLING

Bradshaw T., 2015, JABS00235 SOLAR DECA

[Anonymous], 2015, CAL IRR MAN INF SYST

[Anonymous], 2011, COMPL DES ASS MAN CD

Chen B., 1995, P NAT PASS SOL C CIT

Clark D., DETERMINATION CLEAR

Dobos AP, 2014, PVWATTS VERSION 5 MA

Duffie J., 2006, SOLAR ENG THERMAL PR

[Anonymous], 2014, FRONT LOAD DRYER FFQ

[Anonymous], 2014, FRONT LOAD WASH FFFW

[Anonymous], 2014, TOP MOUNT REFR FFHT1

Hermann A., 2013, THE NEXUS HUB

[Anonymous], 2011, RPLS730B RPLS731B 7

[Anonymous], SGE63E06UC EV 24 SPE

[Anonymous], SGE63E05UC28 INSTR U

Incropera F. P., 2002, INTRO HEAT TRANSFER

[Anonymous], 2015, 07 21 16 BLANK INS E

Krigger J., 2009, RESIDENTIAL ENERGY C

Larson B., 2015, LAB ASSESSMENT GE GE

[Anonymous], 2015, NEX EWATER CALC 2015

Nexheater Introduction, 2015, NEXH INTR

[Anonymous], 2014, ICF HOM THERM MASS

Part C., 1998, ENERGY COSNERVATIO C

Persson ML, 2006, ENERGBUILDINGS, V38, P181, DOI 10.1016/j.enbuild.2005.05.006

Philibert C, 2014, TECHN ROADM SOL PHOT  
[Anonymous], INST GUID C180  
Ralph HP, 2007, GEN CHEM PRINCIPLES, P606  
Richmond C., THE NEXHEATER ONE  
[Anonymous], 2015, UN46H5203AF  
[Anonymous], 2014, H5005 SPECSHEET 7 29  
SPRAGUE PE, 1981, J SOC ARCHIT HIST, V40, P311, DOI 10.2307/989648  
Standard A., 2010, 552010 A STAND  
Razali NSHNLMSI, 2011, WORLD ACAD SCI ENG T, V58, P588  
[Anonymous], EXT DAT E SER RES SP  
[Anonymous], 2010, SUNPOWER SPR 5000M S  
[Anonymous], 2011, ZON SENTR BALL VALV  
[Anonymous], 2008, MOD 0013 CARTR CIRC  
[Anonymous], 2015, PRORADIANT HEAT COOL  
Wilson E., 2014, 2014 BUILDING AM HOU  
[Anonymous], 2014, KNAUF DAT SHEET BI B  
[Anonymous], 2015, PREM HYBR 50 80 GALL

NR 48  
TC 1  
Z9 1  
U1 4  
U2 25  
PU PERGAMON-ELSEVIER SCIENCE LTD  
PI OXFORD  
PA THE BOULEVARD, LANGFORD LANE, KIDLINGTON, OXFORD OX5 1GB, ENGLAND  
SN 0960-1481  
J9 RENEW ENERG  
JI Renew. Energy  
PD FEB  
PY 2017  
VL 101  
BP 1242  
EP 1255  
DI 10.1016/j.renene.2016.10.016  
PG 14  
WC GREEN & SUSTAINABLE SCIENCE & TECHNOLOGY; Energy & Fuels  
SC Science & Technology - Other Topics; Energy & Fuels  
GA ED3VD  
UT WOS:000388775700112  
DA 2018-05-03  
ER

PT S  
AU Beazley, S  
    Heffernan, E  
    McCarthy, TJ  
AF Beazley, Scott  
    Heffernan, Emma  
    McCarthy, Timothy J.  
BE Ma, Z  
    Kokogiannakis, G  
    Cooper, P  
TI Enhancing energy efficiency in residential buildings through the use of  
    BIM: The case for embedding parameters during design  
SO IMPROVING RESIDENTIAL ENERGY EFFICIENCY INTERNATIONAL CONFERENCE, IREE  
    2017  
SE Energy Procedia  
LA English

DT Proceedings Paper  
 CT International Conference on Improving Residential Energy Efficiency  
 (IREE)

CY FEB 16-17, 2017

CL Woollongong, AUSTRALIA

SP Univ Woollongong, Sustainable Buildings Res Ctr

DE Energy efficiency; BIM; Section J; Building regulations

AB A building design is typically created by a collaboration of professionals. Whilst the advent of BIM tools makes the assessment of the performance of an iterative design possible, these tools are not commonly used, due to traditional practice prevailing, technical limitations including differing data formats, and industry resistance to innovation. Timely consistent feedback throughout the design process, as major design decisions are made, could enable the enhancement of energy efficiency. However, current design guidelines are typically not in digital rule form, preventing the automated checking and validation of developing design models. Furthermore, architectural design tools have poor connections to thermal and environmental analysis software, which is exacerbated by a lack of knowledge of the data requirements of other disciplines both upstream and downstream. This paper explores the potential for embedding parameters within architectural model files to enable the enhancement of energy efficiency at the design stage and through the design process. It explores the architectural to energy analysis data exchanges, and demonstrates the way in which energy efficiency parameters can be embedded within model files to inform decision making at the conceptual design stage. The paper found that by using tools readily available, it is possible to add value during the design process through the use of BIM, with improved design outcomes as the result. The need to develop new workflows between the disciplines as a result of this different approach was highlighted. This enhanced practice is more responsive and can support better communication within project teams through providing timely information and feedback, providing analysis before optimisation for energy efficiency. (C) 2017 The Authors. Published by Elsevier Ltd. Peer-review under responsibility of the scientific committee of the International Conference on Improving Residential Energy Efficiency.

C1 [Beazley, Scott; Heffernan, Emma; McCarthy, Timothy J.] Univ Wollongong, ARC Steel Res Hub Sustainable Bldg Res Ctr, Wollongong, NSW 2522, Australia.

RP Beazley, S (reprint author), Univ Wollongong, ARC Steel Res Hub Sustainable Bldg Res Ctr, Wollongong, NSW 2522, Australia.

EM sbeazley@uow.edu.au

OI McCarthy, Timothy/0000-0001-7010-3687

FU Steel Research Hub - Australian Research Council and industry  
 [IH130100017]

FX This research is funded through the Steel Research Hub (Project no. IH130100017) which is jointly funded by the Australian Research Council and industry. The authors would like to thank the industry partners, BlueScope, Cox Architecture and Stockland, for their support of the project; and the reviewers for their invaluable comments.

CR Anderson K., 2014, DESIGN ENERGY SIMULA

Autodesk, 2008, BUILD PERF AN US REV

Azhar S., 2011, LEADERSHIP MANAGE EN, P241, DOI [10.1061/(ASCE)LM.1943-5630.0000127, DOI 10.1061/(ASCE)LM.1943-5630.0000127]

Cemesova A, 2015, AUTOMAT CONSTR, V57, P17, DOI 10.1016/j.autcon.2015.04.014

CRC Construction Innovation, 2009, NATL GUIDELINES DIGI

de Souza CB, 2013, AUTOMAT CONSTR, V30, P81, DOI 10.1016/j.autcon.2012.11.026

Hagan S. R., 2009, J BUILD INF MODEL

International Energy Agency, 2013, TRANS SUST BUILD

Integrated Environmental Solutions, 2014, BIM BUILD PERF AN US

Laine T., 2012, COBIM COMMON BIM REQ

Marsh A., 2015, BIM NATHERS HEADACHE

Marszal AJ, 2011, ENERG BUILDINGS, V43, P971, DOI 10.1016/j.enbuild.2010.12.022

buildingSMART, 2017, IFC OV SUMM

Solibri, 2012, COBIM COMM BIM REQ S

US General Services Administration, 2012, SER 05 GSA BIM GUID

US General Services Administration, 2009, INF DEL MAN BIM BAS

Yee P., 2009, THE GSA BIM STORY

NR 17  
 TC 1  
 Z9 1  
 U1 0  
 U2 0  
 PU ELSEVIER SCIENCE BV  
 PI AMSTERDAM  
 PA SARA BURGERHARTSTRAAT 25, PO BOX 211, 1000 AE AMSTERDAM, NETHERLANDS  
 SN 1876-6102  
 J9 ENRGY PROCED  
 PY 2017  
 VL 121  
 BP 57  
 EP 64  
 DI 10.1016/j.egypro.2017.07.479  
 PG 8  
 WC Construction & Building Technology; Energy & Fuels  
 SC Construction & Building Technology; Energy & Fuels  
 GA BJ6KG  
 UT WOS:000426789900008  
 OA gold  
 DA 2018-05-03  
 ER

PT J  
 AU Di Giulio, R  
     Turillazzi, B  
     Marzi, L  
     Pitzianti, S  
 AF Di Giulio, Roberto  
     Turillazzi, Beatrice  
     Marzi, Luca  
     Pitzianti, Stefania  
 TI Integrated BIM-GIS based design for high energy efficiency hospital  
     buildings  
 SO TECHNE-JOURNAL OF TECHNOLOGY FOR ARCHITECTURE AND ENVIRONMENT  
 LA English  
 DT Article  
 DE energy efficiency; healthcare districts; building information modeling;  
     semantic driven design  
 AB The interoperability of the tools for managing and controlling the design process is one of the themes on  
     which research and innovations are focussed in the field of BIM (Building Information Modelling) systems.  
     A strategic objective of the STREAMER research, co-funded by the European Union within the context of  
     the Seventh Framework Programme, is that of defining the tools and methods of designing hospital  
     buildings that allow for a 50% reduction in energy consumption and emissions in large healthcare districts.  
     Contributing to the achievement of this result is the creation of integrated tools, based on BIM and GIS  
     systems, capable of providing an effective backup to the decisions of the various subjects involved in the  
     project and the management of hospital complexes.  
 C1 [Di Giulio, Roberto; Turillazzi, Beatrice] Univ Ferrara, Dipartimento Architettura, Ferrara, Italy.  
     [Marzi, Luca] Univ Florence, Dipartimento Architettura, Florence, Italy.  
     [Pitzianti, Stefania] Becquerel Elect Srl, Reggio Emilia, Italy.  
 RP Di Giulio, R (reprint author), Univ Ferrara, Dipartimento Architettura, Ferrara, Italy.  
 EM dgr@unife.it; tll@unife.it; luca.mari@unifi.it; s.pitzianti@becquerel.it  
 OI Di Giulio, Roberto/0000-0002-8569-1271  
 FU European Community's Seventh Framework Programme [608739]  
 FX The research leading to these results has received funding from the  
     European Community's Seventh Framework Programme under Grant Agreement  
     No. 608739 (Project STREAMER).

CR DiGiulio R., 2014, ECPPM 2014 EWORKS EB, P907  
 Hempel S., 2016, CESB16 P 22 24 JUN 2, P221  
 Iadanza E, 2015, IFMBE PROC, V45, P649, DOI 10.1007/978-3-319-11128-5\_162  
 Luschi A., 2013, IFMBE P 13 MED C MED, V41  
 Matthyssen A., 2011, INTRO CONCURRENT DES  
 Netherlands Board for Healthcare Institutions, 2007, 611 NETH BOARD HEALT  
 NR 6  
 TC 1  
 Z9 1  
 U1 14  
 U2 15  
 PU FIRENZE UNIV PRESS  
 PI FIRENZE  
 PA JOURNALS DIVISION, BORGO ALBIZI, 28, FIRENZE, 50122, ITALY  
 SN 2239-0243  
 J9 TECHNE  
 JI Techne  
 PY 2017  
 VL 13  
 BP 243  
 EP 255  
 DI 10.13128/Techne-19728  
 PG 13  
 WC Architecture  
 SC Architecture  
 GA FE2CY  
 UT WOS:000408025100032  
 OA gold  
 DA 2018-05-03  
 ER  
  
 PT J  
 AU Gana, JA  
     Hoppe, T  
 AF Gana, James A.  
     Hoppe, Thomas  
 TI Assessment of the Governance System Regarding Adoption of Energy  
     Efficient Appliances by Households in Nigeria  
 SO ENERGIES  
 LA English  
 DT Article  
 DE energy efficiency; policy; household electrical appliances; governance;  
     Nigeria  
 ID RESIDENTIAL SECTOR; CO2 EMISSIONS; CONSERVATION; CONSUMPTION; BEHAVIOR;  
     ENVIRONMENT; ATTITUDES; STRATEGY; DESIGN; JAPAN  
 AB The adoption of energy efficient electrical appliances by households has a great potential to reduce electricity consumption in Nigeria. A well-formulated and implemented policy (mix) to spur adoption is said to be required to drive this process. This article presents an assessment of policies that aim to spur adoption among households, and the related governance system. The analytical framework used for this analysis is the Governance Assessment Tool (GAT). Data collection involved semi-structured interviews, a review of policy documents, and secondary quantitative data. The results show that policies in Nigeria had little effect in meeting pre-set goals. The governance system was found to be weakly developed due to a lack of policy, the overlapping work of different governmental organizations, a lack of appropriate resources, and a lack of householders' involvement in agenda-setting and decision-making processes. Current actions mostly depend on local programmes that run via donor aid. They include the free exchange of CFL bulbs and metering studies of end user energy consumption. The results add further insight in the fields of governance and policy on energy efficiency issues in developing countries. This

article also provides suggestions for the design of policies that target the adoption of energy efficient electrical appliances among households in Nigeria.

C1 [Gana, James A.] Energy Commiss Nigeria, Dept Energy Management Training & Manpower Dev, Cent Area, Plot 701C,PMB 358 Garki, Fct Abuja 900001, Nigeria.

[Hoppe, Thomas] Delft Univ Technol, Fac Technol Policy & Management TPM, Policy Org Law & Gaming POLG, Dept Multiactor Syst MAS, Jaffalaan 5, NL-2628 BX Delft, Netherlands.

RP Hoppe, T (reprint author), Delft Univ Technol, Fac Technol Policy & Management TPM, Policy Org Law & Gaming POLG, Dept Multiactor Syst MAS, Jaffalaan 5, NL-2628 BX Delft, Netherlands.

EM jamesganaone@gmail.com; T.Hoppe@tudelft.nl

CR Abrahamse W, 2005, J ENVIRON PSYCHOL, V25, P273, DOI 10.1016/j.jenvp.2005.08.002

Ashina S, 2008, APPL ENERG, V85, P204, DOI 10.1016/j.apenergy.2007.07.012

Ashina S, 2008, APPL ENERG, V85, P101, DOI 10.1016/j.apenergy.2007.06.011

Bansal P, 2011, APPL THERM ENG, V31, P3748, DOI 10.1016/j.applthermaleng.2011.07.023

Barr S, 2005, ENERG POLICY, V33, P1425, DOI 10.1016/j.enpol.2003.12.016

Borg SP, 2011, ENERG BUILDINGS, V43, P2240, DOI 10.1016/j.enbuild.2011.05.001

Bressers H., 2016, GOVERNANCE ASSESMEN, P45

Brounen D, 2013, ENERG ECON, V38, P42, DOI 10.1016/j.eneco.2013.02.008

Coetzee K, 2014, CLIM DEV, V6, P4, DOI 10.1080/17565529.2013.867245

DeBoer C, 2013, EARTHSCAN STUD WATER, P1

National Energy Policy; Draft Revised Edition (NEP), 2013, NAT EN POL

National Energy Policy (NEP), 2003, NAT EN POL

Energy Commission of Nigeria (ECN), 2012, REN EN MAST

Energy Commission of Nigeria (ECN), 2007, NAT EN MAST

Eichhammer W., 2009, STUDY ENERGY SAVINGS

Electronic Communication Network, 2010, INT REP ECN EC CUB 1

Frederiks ER, 2015, ENERGIES, V8, P573, DOI 10.3390/en8010573

Fuchs D. A., 2000, P WORKSH SUST HOUS C

Gaspar R, 2011, ENERG POLICY, V39, P7335, DOI 10.1016/j.enpol.2011.08.057

Ghisi E, 2007, ENERG POLICY, V35, P4107, DOI 10.1016/j.enpol.2007.02.020

Goldman C, 2010, COORDINATION ENERGY

Hoppe T, 2016, ENERGY RES SOC SCI, V21, P12, DOI 10.1016/j.erss.2016.06.006

Hoppe T, 2012, ENERG POLICY, V51, P791, DOI 10.1016/j.enpol.2012.09.026

Iwano J, 2010, ENERG POLICY, V38, P7744, DOI 10.1016/j.enpol.2010.08.027

Koster AM, 2013, LECT N ENERG, V23, P33, DOI 10.1007/978-1-4471-5595-9\_3

Ma G, 2013, ENERG POLICY, V56, P591, DOI 10.1016/j.enpol.2013.01.024

Mills B, 2012, ENERG POLICY, V49, P616, DOI 10.1016/j.enpol.2012.07.008

Nair G, 2010, ENERG POLICY, V38, P2956, DOI 10.1016/j.enpol.2010.01.033

National Bureau of Statistics (NBS), 2012, SOC STAT NIG 3

National Bureau of Statistics (NBS), 2014, MEAS BETT PREL RES R

O'Doherty J, 2008, APPL ENERG, V85, P650, DOI 10.1016/j.apenergy.2008.01.001

Sardianou E, 2007, ENERG POLICY, V35, P3778, DOI 10.1016/j.enpol.2007.01.020

Shimoda Y, 2010, APPL ENERG, V87, P1944, DOI 10.1016/j.apenergy.2009.10.021

Sovacool BK, 2014, NATURE, V511, P529, DOI 10.1038/511529a

Travezan JY, 2013, ENERG POLICY, V61, P317, DOI 10.1016/j.enpol.2013.05.096

United Nations Development Programme (UNDP), 2016, END US MET CAMP RES

United Nations Environment Programme (UNEP), 2012, REG REP EFF LIGHT SU, P1

US Energy Information Administration, 2013, NIG FULL REP

Varone F, 2001, ENERG POLICY, V29, P615, DOI 10.1016/S0301-4215(00)00156-7

Vassileva I, 2012, APPL ENERG, V90, P182, DOI 10.1016/j.apenergy.2011.05.031

Wood G, 2003, ENERG BUILDINGS, V35, P821, DOI 10.1016/S0378-7788(02)00241-4

Yohanis YG, 2012, ENERG POLICY, V41, P654, DOI 10.1016/j.enpol.2011.11.028

Yue T, 2013, ENERG POLICY, V62, P665, DOI 10.1016/j.enpol.2013.07.051

NR 43

TC 1

Z9 1

U1 0

U2 7

PU MDPI AG

PI BASEL  
 PA ST ALBAN-ANLAGE 66, CH-4052 BASEL, SWITZERLAND  
 SN 1996-1073  
 J9 ENERGIES  
 JI Energies  
 PD JAN  
 PY 2017  
 VL 10  
 IS 1  
 AR 132  
 DI 10.3390/en10010132  
 PG 21  
 WC Energy & Fuels  
 SC Energy & Fuels  
 GA EI3WG  
 UT WOS:000392422500131  
 OA gold  
 DA 2018-05-03  
 ER

PT J  
 AU Guo, W  
     Zhao, TY  
     Dai, HJ  
 AF Guo, Wen  
     Zhao, Tianyan  
     Dai, Hongjun

TI Calculation and decomposition of regional household energy consumption  
 in China: based on perspectives of urbanization and residents'  
 consumption

SO CHINESE JOURNAL OF POPULATION RESOURCES AND ENVIRONMENT  
 LA English  
 DT Article  
 DE Urbanization; residential consumption; household energy consumption  
 ID CO2 EMISSIONS; INTENSITY; COUNTRIES; LMDI

AB Demographic urbanization caused great changes in scale of residents' consumption and residents' lifestyle and then impacted changes of regional household energy consumption. This paper expanded Logarithmic Mean Decomposition Index method through introducing variables of urbanization and residential consumption into the model. It also analyzed the influences of six factors as energy structure, energy intensity, population scale, urbanization, residential consumption, and consumption inhibit on regional household energy consumption. Results showed that in 2003-2012, impact of urbanization on regional household energy consumption of Chinese three areas was significantly higher than population size. The "population gathered in eastern region" phenomenon caused eastern region getting the largest population scale effect. Driving force of residential consumption on regional household energy consumption was much higher than the other five effects. Due to the comparative advantage of residential consumption compared with government consumption, investment, and net export, the decrease of consumption ratio promoted the growth of regional household energy consumption. Energy intensity in Chinese three regions kept reducing in 2003-2012. The progress of energy utilization technology slowed the growth of regional household energy consumption, and energy intensity effect was most significant in the central region.

C1 [Guo, Wen] Nanjing Univ Finance & Econ, Coll Accounting, Nanjing, Jiangsu, Peoples R China.  
     [Guo, Wen; Dai, Hongjun] Nanjing Univ Aeronaut & Astronaut, Res Inst Financial Dev, Coll Econ &  
     Management, Nanjing 211106, Jiangsu, Peoples R China.  
     [Zhao, Tianyan] Capital Univ Econ & Business, Sch Accounting, Beijing 100070, Peoples R China.

RP Guo, W (reprint author), Nanjing Univ Aeronaut & Astronaut, Res Inst Financial Dev, Coll Econ &  
     Management, Nanjing 211106, Jiangsu, Peoples R China.; Zhao, TY (reprint author), Capital Univ Econ &  
     Business, Sch Accounting, Beijing 100070, Peoples R China.

EM xsyjgw@nuaa.edu.cn

- FU National Natural Science Foundation of China [71671080, 7157109]; National Natural Science Youth Foundation of China [71301070]; National Statistical Science Research Project "Energy statistics and its balance sheet in China based on perspective of energy quality" [2016LZ36]; Science Foundation of Huainan Normal University [2016xj07zd]
- FX This work was financially supported by Funding of National Natural Science Foundation of China "Research on environmental risk assessment and management of the avoidance project based on perspective of public perception," "Research on the evolution mechanism of the avoidance cluster behavior by considering of endogenous information under the internet environment" [Grant Numbers 71671080, 7157109], Funding of National Natural Science Youth Foundation of China "The formation, evolution and conflict coordination of the avoidance behavior" [Grant Number 71301070], Funding of National Statistical Science Research Project "Energy statistics and its balance sheet in China based on perspective of energy quality" [Grant Number 2016LZ36], Funding of Science Foundation of Huainan Normal University "Benefit evaluation of coal mining subsidence area comprehensive management based on external perspective" [Grant Number 2016xj07zd].
- CR Achao C, 2009, ENERG POLICY, V37, P5208, DOI 10.1016/j.enpol.2009.07.043  
 Ang BW, 2004, ENERG POLICY, V32, P1131, DOI 10.1016/S0301-4215(03)00076-4  
 Ang BW, 2000, ENERGY, V25, P1149, DOI 10.1016/S0360-5442(00)00039-6  
 Bin S, 2005, ENERG POLICY, V33, P197, DOI 10.1016/S0301-4215(03)00210-6  
 Cellura M, 2012, RENEW SUST ENERG REV, V16, P1135, DOI 10.1016/j.rser.2011.11.016  
 Chen Q, 2014, CHINA ECON REV, V30, P485, DOI 10.1016/j.chieco.2014.07.005  
 Cohen J, 2010, ENERG EFFIC, V3, P19, DOI 10.1007/s12053-009-9058-6  
 Crosbie T, 2008, ENERG POLICY, V36, P2191, DOI 10.1016/j.enpol.2008.02.010  
 de Freitas LC, 2011, ENERG POLICY, V39, P1495, DOI 10.1016/j.enpol.2010.12.023  
 Druckman A, 2009, ECOL ECON, V68, P2066, DOI 10.1016/j.ecolecon.2009.01.013  
 Fang WS, 2012, ENERG POLICY, V51, P558, DOI 10.1016/j.enpol.2012.08.068  
 Hoekstra R, 2003, ENERG ECON, V25, P39, DOI 10.1016/S0140-9883(02)00059-2  
 Hossain MS, 2011, ENERG POLICY, V39, P6991, DOI 10.1016/j.enpol.2011.07.042  
 Jin Y, 2011, J COMP ECON, V39, P191, DOI 10.1016/j.jce.2010.12.004  
 Krey V, 2012, ENERG ECON, V34, pS272, DOI 10.1016/j.eneco.2012.04.013  
 [??? LIANG Jin-she], 2009, [??????, Journal of Natural Resources], V24, P20  
 Liddle B, 2010, POPUL ENVIRON, V31, P317, DOI 10.1007/s11111-010-0101-5  
 Ma C, 2008, ENERG ECON, V30, P1037, DOI 10.1016/j.eneco.2007.05.005  
 Nie HG, 2014, APPL ENERG, V121, P10, DOI 10.1016/j.apenergy.2014.01.070  
 Pachauri S, 2008, ENERG POLICY, V36, P4022, DOI 10.1016/j.enpol.2008.06.016  
 Sadorsky P, 2013, ENERG ECON, V37, P52, DOI 10.1016/j.eneco.2013.01.009  
 Su B, 2012, ENERG ECON, V34, P177, DOI 10.1016/j.eneco.2011.10.009  
 Sun CW, 2014, ENERG CONVERS MANAGE, V84, P295, DOI 10.1016/j.enconman.2014.04.038  
 Wang Q, 2014, ENERG POLICY, V65, P332, DOI 10.1016/j.enpol.2013.10.005  
 Wang WW, 2014, ENERGY, V67, P617, DOI 10.1016/j.energy.2013.12.064  
 Xu SC, 2014, APPL ENERG, V127, P182, DOI 10.1016/j.apenergy.2014.03.093  
 Yue TX, 2005, POPUL ENVIRON, V26, P207, DOI 10.1007/s11111-005-1875-8  
 Zha DL, 2010, ENERG POLICY, V38, P3377, DOI 10.1016/j.enpol.2010.02.011  
 Zhao XL, 2012, ENERG POLICY, V41, P644, DOI 10.1016/j.enpol.2011.11.027  
 Zheng XY, 2014, ENERG POLICY, V75, P126, DOI 10.1016/j.enpol.2014.07.016
- NR 30  
 TC 1  
 Z9 2  
 U1 2  
 U2 2
- PU ROUTLEDGE JOURNALS, TAYLOR & FRANCIS LTD  
 PI ABINGDON  
 PA 2-4 PARK SQUARE, MILTON PARK, ABINGDON OX14 4RN, OXON, ENGLAND  
 SN 1004-2857



EI 2325-4262  
J9 CHIN J POPUL RESOUR  
JI Chin. J. Popul. Resour. Environ.  
PY 2017  
VL 15  
IS 2  
BP 132  
EP 141  
DI 10.1080/10042857.2017.1322863  
PG 10  
WC Environmental Studies  
SC Environmental Sciences & Ecology  
GA FB8AT  
UT WOS:000406361900006  
DA 2018-05-03  
ER

PT S  
AU Hawas, A  
    Al-Habaibeh, A  
    Medjdoub, B  
AF Hawas, Allan  
    Al-Habaibeh, Amin  
    Medjdoub, Benachir

BE Yan, J  
    Sun, F  
    Chou, SK  
    Desideri, U  
    Li, H  
    Campana, P  
    Xiong, R

TI Innovative design of an educational physical simulation tool for  
    investigating energy consumption in buildings for enhancing public  
    engagement

SO 8TH INTERNATIONAL CONFERENCE ON APPLIED ENERGY (ICAE2016)

SE Energy Procedia

LA English

DT Proceedings Paper

CT 8th International Conference on Applied Energy (ICAE)

CY OCT 08-11, 2016

CL Beijing Inst Technol, Beijing, PEOPLES R CHINA

SP Appl Energy Innovat Inst, Malardalen UNiv, China Assoc Sci & Technologies, HOME Program, Sichuan Univ, Jiangsu Univ, China Univ Min & Technol, Tianjin Univ, Tongji Univ, SW Jiaotong Univ, Xian Jiaotong Univ, Collaborat Innovat Ctr Elect Vehicles Beijing, Technol Unnovat Local Scale Optimum Integrat Battery Energy Storage, BAIC, BJEV, YuTong, Shenwu Grp

HO Beijing Inst Technol

DE Building energy efficiency; simulation; educational tool; Building energy consumption; Thermal performance; Innovation

AB Reducing carbon emission and energy consumption in buildings is becoming an important priority on global level. Buildings consume significant amount of energy for heating or air-conditioning in most countries. The drive to enhance the understanding of building insulation and its effect on energy use, is critical for improving public engagement to achieve reduce carbon emission towards more sustainable future. This paper presents the design and the development an educational and research simulation tool to study and understand the thermal performance and energy efficiency of buildings. The novel design includes small-scale multi-layered model of buildings where insulation layers can be added to or removed from the building model in a modular and interchangeable manner to allow changes to the thermal performance. The results show that this novel model will provide a new educational tool to enhance the understanding of energy consumption and insulation in buildings. The design can be used to engage the

young generation regarding building insulation and energy efficiency. It also could provide an advanced research and teaching tool for energy in buildings, instrumentation and infrared thermography. (C) 2017 The Authors. Published by Elsevier Ltd.

C1 [Hawas, Allan; Al-Habaibeh, Amin; Medjdoub, Benachir] Nottingham Trent Univ, Sch Architecture Design & Built Environm, Burton St, Nottingham NG1 4BU, England.

RP Al-Habaibeh, A (reprint author), Nottingham Trent Univ, Sch Architecture Design & Built Environm, Burton St, Nottingham NG1 4BU, England.

EM Amin.Al-Habaibeh@ntu.ac.uk

CR Al-Habaibeh A., 2010, 7 JORD INT MECH ENG, V2, P27

Camilleri M. F. L. I. N., 2008, BRANZ, V130, P1

[Anonymous], 2010, OFF J EUR UNION, V153, P13, DOI DOI 10.3000/17252555.6.2010.153.ENG

[Anonymous], 2008, EU EN TRANSP INF STA

Goodhew J., 2014, ENV BEHAV

Haglund J, 2016, INFRARED PHYS TECHN, V75, P150, DOI 10.1016/j.infrared.2015.12.009

Jonsson A, 1997, BUILD ENVIRON, V32, P245

Kim J., 2009, BUILD SIMUL, V2009, P674

La Rosa AD, 2014, CONSTR BUILD MATER, V55, P406, DOI 10.1016/j.conbuildmat.2014.01.054

Tetty UYA, 2014, ENERG BUILDINGS, V82, P369, DOI 10.1016/j.enbuild.2014.07.009

Xie C., 2010, ENG DES ED RES SUMMI, VP-12, P1

Yu JH, 2009, APPL ENERG, V86, P2520, DOI 10.1016/j.apenergy.2009.03.010

NR 12

TC 1

Z9 1

U1 0

U2 0

PU ELSEVIER SCIENCE BV

PI AMSTERDAM

PA SARA BURGERHARTSTRAAT 25, PO BOX 211, 1000 AE AMSTERDAM, NETHERLANDS

SN 1876-6102

J9 ENRGY PROCED

PY 2017

VL 105

BP 2615

EP 2622

DI 10.1016/j.egypro.2017.03.753

PG 8

WC Energy & Fuels

SC Energy & Fuels

GA BIOMH

UT WOS:000404967902112

OA gold

DA 2018-05-03

ER

FN Clarivate Analytics Web of Science

VR 1.0

PT B

AU Hoosain, MS

Paul, BS

AF Hoosain, Mohamed Sameer

Paul, Babu Sena

GP IEEE

TI Smart homes: A domestic demand response and demand side energy management system for future smart grids

SO PROCEEDINGS OF THE 2017 TWENTY FIFTH INTERNATIONAL CONFERENCE ON THE DOMESTIC USE OF ENERGY (DUE)

LA English

DT Proceedings Paper

CT 25th Annual International Conference on the Domestic Use of Energy (DUE)

CY APR 04-05, 2017

CL Cape Town, SOUTH AFRICA

SP Cape Peninsula Univ Technol, IEEE IAS, IES, PELS and Power & Energy Soc Chapters, S African Assoc Energy Serv Co, S African Inst Elect Engineers, Assoc Municipal Elect Undertakings, So Assoc Energy Efficiency, Sustainable Energy Soc So Africa, Natl Energy Efficiency Agcy, Univ Stelienbosch, Univ Cape Town, N W University, Eskom

DE Demand side management (DSM); demand response (DR); energy efficiency; smart grid; smart homes

AB Smart homes or the homes of the future will be equipped with advanced technologies for user comfort and entertainment. Intelligent systems will be available to ensure this comfort and reliability. With these technological advancements comes further energy management. The concept of domestic energy efficiency is a concern at present and will be, in the future. So how do we optimize homes and users as to how they conserve energy? Domestic user's energy usage represents a large amount of total electricity demand. Typical home energy systems utilize a rudimentary form of energy efficiency and management. In this paper we look at a Demand Response and Demand side management system model to curb this situation. The demand response system is achieved by the utility turning on/off smart power plugs wirelessly throughout the home based on peak and off peak periods via communication through its smart grid. To help consumers shift their loads during these times, appliance power sources that can act autonomously based on wired or wireless signals received from the utility via its smart grid is required. Users in response to this, connect their appliances to these plugs by generating their own hierarchy system by prioritizing their appliance usage. Whereas the demand side management system allows users to manually configure dates and times for the turning on/off of the smart power plugs wirelessly through the user's smart user interface. Therefore, an energy efficient future smart home that can save the user on monthly expenditure and save on energy simultaneously.

C1 [Hoosain, Mohamed Sameer; Paul, Babu Sena] Univ Johannesburg, Dept Elect Engn Technol, POB 17011, ZA-2028 Doornfontein, South Africa.

RP Hoosain, MS (reprint author), Univ Johannesburg, Dept Elect Engn Technol, POB 17011, ZA-2028 Doornfontein, South Africa.

EM Sameer.hoosain@gmail.com; bspaul@uj.ac.za

CR Barbato A., 2013, 2013 IEEE ONL C GREE

Bureau P., 2017, POWERWISE DEMAND SID

Cary M., 2012, ENERGY EFFICIENCY RE

Department of Energy, 2013, SURV EN REL BEH PERC

Gharavi H., 2011, P IEEE, V99, P917, DOI 10.1109/JPROC.2011.2124210

GUNGOR V. C., SMART GRID TECHNOLOG

Hoosain M., 2016, POWER ENERGY SYSTEMS, P1

Joshi H., 2014, INT J POWER SYSTEM O, V2, P75

Kreith F., 2008, ENERGY MANAGEMENT CO

SAMSET - Supporting Sub-Saharan African Municipalities with Sustainable Energy Transitions, 2013,

SAMSET EN URB S AFR, p[3, 13]

[USDA USDI State of Idaho State of Montana], 2015, MID POP EST, P1

Wilms I., 2010, DIFFERENCE DEMAND RE

Yang P., 2013, IEEE T POWER SYSTEMS, V28, P1

NR 13

TC 1

Z9 1

U1 0

U2 1

PU IEEE

PI NEW YORK

PA 345 E 47TH ST, NEW YORK, NY 10017 USA

BN 978-0-9946-7592-7

PY 2017

BP 285

EP 291

PG 7

WC Energy & Fuels; Engineering, Electrical & Electronic

SC Energy & Fuels; Engineering

GA BH8DN  
UT WOS:000403220700036  
DA 2018-05-03  
ER

PT S  
AU Park, C  
Xing, R  
Hanaoka, T  
Kanamori, Y  
Masui, T

AF Park, Chan  
Xing, Rui  
Hanaoka, Tatsuya  
Kanamori, Yuko  
Masui, Toshihiko

BE Howlett, R  
Capozzoli, A  
Serra, V

TI Impact of Energy Efficient Technologies on Residential CO<sub>2</sub> Emissions: A  
Comparison of Korea and China

SO 8TH INTERNATIONAL CONFERENCE ON SUSTAINABILITY IN ENERGY AND BUILDINGS,  
SEB-16

SE Energy Procedia

LA English

DT Proceedings Paper

CT 8th International Conference on Sustainability in Energy and Buildings  
(SEB)

CY SEP 11-13, 2016

CL Politecnico Torino, Turin, ITALY

HO Politecnico Torino

DE Residential sector; climate change; carbon emissions; energy efficient  
technology; climate and economic disparity

ID CONSUMPTION; EXPENDITURE; POLICIES; DEMAND

AB The residential sector accounts for the second or third share of final energy consumption and CO<sub>2</sub> (carbon dioxide) emissions in both The Republic of Korea and in China. Energy service demand in the residential sector in these countries is influenced by climate and economic circumstances. However, in previous studies, such regional disparities are often overlooked, hence this study analyzes 6 Korean sub-national and 31 Chinese provincial levels while taking into consideration of regional disparities. In this study principal socio-economic drivers such like GDP (Gross domestic product) and population are taken from used Shared Socioeconomic Pathways (SSPs). The impact of efficient technologies on future CO<sub>2</sub> emissions is evaluated using the AIM (Asia-Pacific Integrated Model)/Enduse, a technology bottom-up optimization model integrated with bottom-up service demand models. Three future scenarios are also designed to conduct future evaluation on CO<sub>2</sub> emissions growth and potential mitigation measures to meet the emissions target. From the results, impact of each technology was shown to vary across regions. Heating devices, water-heaters and cooking ranges with higher efficiencies are the most effective efficient technologies for both countries. Achieving a 30% CO<sub>2</sub> emissions reduction goal requires the combination of various technologies across various regions due to differences in climate and economic circumstances. (C) 2017 The Authors. Published by Elsevier

C1 [Park, Chan] Univ Seoul, Baebong Hall 6223,163 Seoulsiripdaero, Seoul 02504, South Korea.

[Xing, Rui; Hanaoka, Tatsuya; Kanamori, Yuko; Masui, Toshihiko] Natl Inst Environm Studies, 16-2  
Onogawa, Tsukuba, Ibaraki 3058506, Japan.

RP Xing, R (reprint author), Natl Inst Environm Studies, 16-2 Onogawa, Tsukuba, Ibaraki 3058506, Japan.

EM xing.rui@nies.go.jp

FU Environment Research and Technology Development Fund of the Ministry of  
the Environment, Japan [S-12-2]

FX This research was supported by the Environment Research and Technology  
Development Fund (S-12-2) of the Ministry of the Environment, Japan.

CR Buchs M, 2013, ECOL ECON, V90, P114, DOI 10.1016/j.ecolecon.2013.03.007  
 Chang Y, 2013, ENER POLICY, V62, P656, DOI 10.1016/j.enpol.2013.07.053  
 Chitnis M, 2012, APPL ENER, V94, P202, DOI 10.1016/j.apenergy.2012.01.005  
 Dai HC, 2012, ENER POLICY, V50, P736, DOI 10.1016/j.enpol.2012.08.023  
 Diaz-Rainey I, 2015, ENER POLICY, V82, P105, DOI 10.1016/j.enpol.2015.03.003  
 Eom J, 2012, ENERGY, V46, P405, DOI 10.1016/j.energy.2012.08.009  
 Evans M, 2014, ENER POLICY, V64, P243, DOI 10.1016/j.enpol.2013.06.040  
 Feng ZH, 2011, ENERGY, V36, P656, DOI 10.1016/j.energy.2010.09.049  
 Galvin R, 2014, ENER POLICY, V73, P323, DOI 10.1016/j.enpol.2014.02.033  
 Hanaoka T., 2015, AIM ENDUSE MODEL MAN  
 Hart M, 2004, ENER BUILDINGS, V36, P161, DOI 10.1016/j.enbuild.2003.10.009  
 IEA (International Energy Agency), 2013, TRANS SUST BUILD STR  
 IEA, 2012, EN POL IEA COUNTR RE  
 IIASA International Institute for Applied Systems Analysis, SSP DAT VERS 0 93  
 Jiang KJ, 2006, ENVIRON ECON POLICY, V7, P233, DOI 10.1007/s10018-005-010S-z  
 Kainuma M, 2003, CLIMATE POLICY ASSES  
 KEEL, 2011, EN CONS SURV 2011  
 KEEL, 2005, EN CONS SURV 2005  
 KEEL, 2008, EN CONS SURV 2008  
 KEEL, 2002, EN CONS SURV 2002  
 Kim D., 2013, J ENER ENG-ASCE, V22, P83  
 Kim Y., 2015, ENER POLICY, V82, P105  
 Kong XF, 2012, ENER POLICY, V41, P624, DOI 10.1016/j.enpol.2011.11.024  
 Li J, 2015, J CLEAN PROD, V90, P326, DOI 10.1016/j.jclepro.2014.11.061  
 Moon J., 2011, KOREAN J AIR CONDITI, V23, P646  
 NESB (National Bureau of Statistics of China), 2011, CHIN EN STAT YB 2011  
 Noh D., 0917 KEEL  
 Papachristos G, 2015, ENER BUILDINGS, V86, P403, DOI 10.1016/j.enbuild.2014.09.077  
 Park C., 2014, 4 C EAAERE BUS REP K  
 Park HC, 2007, ENER POLICY, V35, P2839, DOI 10.1016/j.enpol.2006.10.002  
 Rosas-Flores JA, 2011, ENER BUILDINGS, V43, P10, DOI 10.1016/j.enbuild.2010.08.020  
 Van Vuuren, 2012, GLOBAL ENVIRON CHANG, V22, P31  
 Xing R., 2013, INT J SUSTAINABLE BU, V4, P229  
 Xing R, 2015, ENVIRON RES LETT, V10, DOI 10.1088/1748-9326/10/6/065001  
 Zhang YR, 2013, ENER POLICY, V62, P768, DOI 10.1016/j.enpol.2013.06.128  
 [Anonymous], ECONOMIST  
 NR 36  
 TC 1  
 Z9 1  
 U1 0  
 U2 2  
 PU ELSEVIER SCIENCE BV  
 PI AMSTERDAM  
 PA SARA BURGERHARTSTRAAT 25, PO BOX 211, 1000 AE AMSTERDAM, NETHERLANDS  
 SN 1876-6102  
 J9 ENRGY PROCED  
 PY 2017  
 VL 111  
 BP 699  
 EP 708  
 DI 10.1016/j.egypro.2017.03.231  
 PG 10  
 WC GREEN & SUSTAINABLE SCIENCE & TECHNOLOGY; Energy & Fuels  
 SC Science & Technology - Other Topics; Energy & Fuels  
 GA BH4TC  
 UT WOS:000400643800071  
 OA gold  
 DA 2018-05-03

ER

PT S

AU Synnefa, A

Vasilakopoulou, K

De Masi, RF

Kyriakodis, GE

Londorfos, V

Mastrapostoli, E

Karlessi, T

Santamouris, M

AF Synnefa, Afroditi

Vasilakopoulou, Konstantina

De Masi, Rosa Francesca

Kyriakodis, Georgios-Evrystheas

Londorfos, Vasilis

Mastrapostoli, Elena

Karlessi, Theoni

Santamouris, Mat

BE Ding, L

Fiorito, F

Osmond, P

TI Transformation through renovation: An energy efficient retrofit of an apartment building in Athens

SO INTERNATIONAL HIGH-PERFORMANCE BUILT ENVIRONMENT CONFERENCE - A SUSTAINABLE BUILT ENVIRONMENT CONFERENCE 2016 SERIES (SBE16), IHBE 2016

SE Procedia Engineering

LA English

DT Proceedings Paper

CT International High-Performance Built Environment Conference (IHBE)

CY NOV 17-18, 2016

CL Sydney, AUSTRALIA

SP UNSW Built Environm, CRC Low Carbon Living, UrbanGrowth NSW

DE energy efficient retrofit; post retrofit monitoring; occupants evaluation

AB A 7 story social housing apartment building in Athens, Greece has been renovated following a holistic energy efficient retrofit process. The retrofit plan, resulting from tenant surveys, environmental parameters monitoring and extensive energy simulations, included commercially available technologies like insulation and energy efficient windows, innovative technologies like energy efficient lighting and smart coatings, passive techniques like night ventilation as well as RES, aiming to transform this inefficient building into a near zero energy one, achieving a reduction of the energy consumption and CO<sub>2</sub> emissions by 80% and significant improvement of thermal comfort conditions. An experimental campaign has been executed in order to measure and validate the energy savings and indoor comfort conditions before and after the retrofit. The results of this monitoring procedure are reported and analyzed. Measurements include air leakage and thermal imaging for determining leakage rate and heat loss through the building fabric, smart meters to record energy consumption and indoor and outdoor environmental measurements. The opinion of the occupants is taken into account through pre- and post-retrofit surveys. (C) 2017 The Authors. Published by Elsevier

C1 [Synnefa, Afroditi; Kyriakodis, Georgios-Evrystheas; Londorfos, Vasilis; Mastrapostoli, Elena; Karlessi, Theoni; Santamouris, Mat] Univ Athens, Bldg Phys 5, Univ Campus, Athens 15784, Greece.

[De Masi, Rosa Francesca] Univ Naples Federico II, Piazzale Tecchio 80, I-80125 Naples, Italy.

RP Synnefa, A (reprint author), Univ Athens, Bldg Phys 5, Univ Campus, Athens 15784, Greece.

EM asynnefa@phys.uoa.gr

RI De Masi, Rosa Francesca/T-5276-2017

OI De Masi, Rosa Francesca/0000-0002-3661-3330; Synnefa,

Afroditi/0000-0003-2093-0179; Kyriakodis,

Georgios-Evrystheas/0000-0001-9909-1085

FU European Union Seventh Framework Programme (FP7) [314283]

FX The research leading to these results has received funding from the European Union Seventh Framework Programme (FP7/2007-2013) in the framework of the "HERB project: Holistic energy-efficient retrofitting of residential buildings", under grant agreement no 314283. We would also like to thank the University of Nottingham for performing the air leakage measurements with the novel pulse leakage tester and providing the relevant results.

CR [Anonymous], ASHRAE GUID 14 2002  
 BPIE (Buildings Performance Institute Europe), 2011, EUROPE'S BUILDINGS MI  
 [Anonymous], 2001, 13829 EN  
 [Anonymous], 2013, 163462013 ISO  
 International Organization for Standardization, 2005, 77302005 ISO  
 Mandler Sandra F., 2006, MA LAZARUS HOK GUIDE  
 [Anonymous], 2010, 207011 TOTEE TECHN C

NR 7

TC 1

Z9 1

U1 0

U2 0

PU ELSEVIER SCIENCE BV

PI AMSTERDAM

PA SARA BURGERHARTSTRAAT 25, PO BOX 211, 1000 AE AMSTERDAM, NETHERLANDS

SN 1877-7058

J9 PROCEDIA ENGINEER

PY 2017

VL 180

BP 1003

EP 1014

DI 10.1016/j.proeng.2017.04.260

PG 12

WC Construction & Building Technology; GREEN & SUSTAINABLE SCIENCE & TECHNOLOGY; Engineering, Environmental; Engineering, Civil

SC Construction & Building Technology; Science & Technology - Other Topics; Engineering

GA BI0JD

UT WOS:000404873600103

OA gold

DA 2018-05-03

ER

PT J

AU Granderson, J

Lin, GJ

AF Granderson, Jessica

Lin, Guanqing

TI Building energy information systems: synthesis of costs, savings, and best-practice uses

SO ENERGY EFFICIENCY

LA English

DT Article

DE Energy efficiency; Energy information systems; Commercial buildings; Costs and savings; Best practices

AB Building energy information systems (EIS) are a powerful customer-facing monitoring and analytical technology that can enable up to 20 % site energy savings for buildings. Few technologies are as heavily marketed, but in spite of their potential, EIS remain an underadopted emerging technology. One reason is the lack of information on purchase costs and associated energy savings. While insightful, the growing body of individual case studies has not provided industry the information needed to establish the business case for investment. Vastly different energy and economic metrics prevent generalizable conclusions. This

paper addresses three common questions concerning EIS use: what are the costs, what have users saved, and which best practices drive deeper savings? We present a large-scale assessment of the value proposition for EIS use based on data from over two-dozen organizations. Participants achieved year-over-year median site and portfolio savings of 17 and 8 %, respectively; they reported that this performance would not have been possible without the EIS. The median 5-year cost of EIS software ownership (up-front and ongoing costs) was calculated to be \$1800 per monitoring point (kilowatt meter points were most common), with a median portfolio-wide implementation size of approximately 200 points. In this paper, we present an analysis of the relationship between key implementation factors and achieved energy reductions. Extent of efficiency projects, building energy performance prior to EIS installation, depth of metering, and duration of EIS were strongly correlated with greater savings. We also identify the best practices use of EIS associated with greater energy savings.

C1 [Granderson, Jessica; Lin, Guanjing] Lawrence Berkeley Natl Lab, Bldg Technol & Urban Syst Div, Berkeley, CA 94720 USA.

RP Granderson, J (reprint author), Lawrence Berkeley Natl Lab, Bldg Technol & Urban Syst Div, Berkeley, CA 94720 USA.

EM jgranderson@lbl.gov

FU Building Technologies Program of the US Department of Energy  
[DE-AC02-05CH11231]

FX The work described in the paper was supported by the Assistant Secretary for Energy Efficiency and Renewable Energy, Building Technologies Program, of the US Department of Energy under Contract No. DE-AC02-05CH11231.

CR Brandstom G., 2014, ENERGY SAVINGS WINDO  
California Energy Commission, 2002, 40002005 FPDF CAL EN  
Capehart B.L., 2011, HDB WEB BASED ENERGY  
Cohen J, 1988, STAT POWER ANAL BEHA  
EIA (U.S. Energy Information Administration), 2003, COMM BUILD EN CONS S  
Energy Information Administration (EIA), 2013, AV RET PRIC EL ULT C  
Energy Information Administration (EIA), 2013, US NAT GAS PRIC  
Eto J. H., 1985, P ASHRAE DOE BTECC C, P109  
Federal Energy Management Program (FEMP), 2011, MET BEST PRACT GUID  
Field A., 2009, DISCOVERING STAT USI  
Price P., 2009, LBNL2899E  
Granderson J., 2011, LBNL5272E  
Granderson J, 2011, ENER EFFIC, V4, P17, DOI 10.1007/s12053-010-9084-4  
Henderson P, 2013, REAL TIME ENERGY MAN  
Institute for Market Transformation (IMT), 2015, COMP BUILD EN BENCHM  
Kramer H., 2013, E13264 PORTL EN CONS  
MANN HB, 1947, ANN MATH STAT, V18, P50, DOI 10.1214/aoms/1177730491  
Mills E., 2005, P NAT C BUILD COMM  
Motegi N., 2003, INT C ENH BUILD OP  
New Building Institute (NBI), 2009, ADV MET EN INF SYST  
NSTC, 2011, SUBM BUILD EN WAT US  
Owen T., 2010, P ACEEE SUMM STUD EN  
Pacific Gas and Electric (PG&E), 2011, ASS EN INF SYST GROG  
Smith D., 2011, ENERGY SMART BUILDIN  
Smothers F. J., 2002, P ACEEE SUMM STUD EN  
United States Environment Protection Agency (US EPA), 2012, BENCHM EN SAV  
Zind T., 2013, SUBMETERING TRENDS C

NR 27

TC 1

Z9 1

U1 1

U2 19

PU SPRINGER

PI DORDRECHT

PA VAN GODEWIJCKSTRAAT 30, 3311 GZ DORDRECHT, NETHERLANDS

SN 1570-646X



EI 1570-6478  
J9 ENERGEN EFFIC  
JI Energy Effic.  
PD DEC  
PY 2016  
VL 9  
IS 6  
BP 1369  
EP 1384  
DI 10.1007/s12053-016-9428-9  
PG 16  
WC GREEN & SUSTAINABLE SCIENCE & TECHNOLOGY; Energy & Fuels; Environmental  
Studies  
SC Science & Technology - Other Topics; Energy & Fuels; Environmental  
Sciences & Ecology  
GA DY5PX  
UT WOS:000385154300009  
DA 2018-05-03  
ER

PT J

AU Kern, AP

Antoniolli, CB

Wander, PR

Mancio, M

Gonzalez, MAS

AF Kern, Andrea Parisi

Antoniolli, Cibele Bossa

Wander, Paulo Roberto

Mancio, Mauricio

Stumpf Gonzalez, Marco Aurelio

TI Energy and water consumption during the post-occupancy phase and the  
users' perception of a commercial building certified by Leadership in  
Energy and Environmental Design (LEED)

SO JOURNAL OF CLEANER PRODUCTION

LA English

DT Article

DE Building certification system; Energy consumption; Water consumption;  
Post-occupancy; Role of user

ID CERTIFICATION; PERFORMANCE; EFFICIENCY

AB Building certification performance has been on the research agenda, and studies from all over the world present different results. Some authors state that the certified buildings are more efficient, while some argue they are not. In Brazil, little is known about the performance of certified buildings, since relatively few are the buildings actually certified, most of them from the private sector. This study analyzed the first years of post-occupancy phase of a Brazilian commercial building, certified by LEED/gold level, version 2.2. Besides energy consumption, the research covered water consumption and the commitment of users' in the adoption of sustainable practices and their perception of the certified building, as well. As main results, the study points that: measured consumption are quite higher than predicted at the design, however show a reduction trend over time; some of the credits scored due to design solution are not effective during the post-occupancy; the majority of the interviewed users are satisfied with thermal and lighting comfort and think that the certification promotes work quality. (C) 2016 Elsevier Ltd. All rights reserved.

C1 [Kern, Andrea Parisi; Antoniolli, Cibele Bossa; Wander, Paulo Roberto; Mancio, Mauricio; Stumpf Gonzalez, Marco Aurelio] Univ Vale Rio dos Sinos, Civil Engn Postgrad Program, Av Unisinos 950, BR-93022000 Bairro Cristo Rei, RS, Brazil.

RP Kern, AP (reprint author), Univ Vale Rio dos Sinos, Civil Engn Postgrad Program, Av Unisinos 950, BR-93022000 Bairro Cristo Rei, RS, Brazil.

EM apkern@unisinos.br; cibeleantoniolli@gmail.com; prwander@unisinos.br;

mancio@unsinos.br; mgonzalez@unisinos.br  
FU CNPq (Conselho Nacional de Pesquisa)  
FX The authors thanks CNPq (Conselho Nacional de Pesquisa) for the research funding, and the generous assistance of all the people from the company who granted us access to their database and perception information.

CR Al-Ghamdi SG, 2015, ENVIRON SCI TECHNOL, V49, P4048, DOI 10.1021/es505938u  
Allouhi A, 2015, J CLEAN PROD, V109, P118, DOI 10.1016/j.jclepro.2015.05.139  
Montanya EC, 2011, ENVIRON SCI TECHNOL, V45, P1757, DOI 10.1021/es1041332  
Diamond R., 2006, P 2006 ACEEE SUMM ST, V3  
Fuerst F, 2011, ECOL ECON, V70, P1220, DOI 10.1016/j.ecolecon.2011.01.026  
Gou Z., 2016, J CLEAN PROD, P1  
Leaman A, 2007, BUILD RES INF, V35, P662, DOI 10.1080/09613210701529518  
Leaman A, 2010, BUILD RES INF, V38, P564, DOI 10.1080/09613218.2010.495217  
Lee YS, 2010, BUILD ENVIRON, V45, P1104, DOI 10.1016/j.buildenv.2009.10.019  
Matisoff DC, 2014, ENVIRON SCI TECHNOL, V48, P2001, DOI 10.1021/es4042447  
Moon H, 2007, J ASIAN ARCHIT BUILD, V6, P267, DOI 10.3130/jaabe.6.267  
Nelms C, 2005, CAN J CIVIL ENG, V32, P114, DOI 10.1139/L04-102  
Newsham GR, 2009, ENERG BUILDINGS, V41, P897, DOI 10.1016/j.enbuild.2009.03.014  
Owensby-Conte D., 2012, INT J CONSTRUCTION E, V1, P27  
Peng CH, 2016, J CLEAN PROD, V112, P453, DOI 10.1016/j.jclepro.2015.08.078  
Scofield JH, 2009, ENERG BUILDINGS, V41, P1386, DOI 10.1016/j.enbuild.2009.08.006  
Shen LY, 2016, J CLEAN PROD, V112, P1789, DOI 10.1016/j.jclepro.2015.06.108  
Suzer O, 2015, J ENVIRON MANAGE, V154, P266, DOI 10.1016/j.jenvman.2015.02.029  
Torcellini P., 2004, P 2004 ACEEE SUMM ST  
Turner C., 2008, ENERGY PERFORMANCE L  
Zhou ZH, 2016, J CLEAN PROD, V112, P3605, DOI 10.1016/j.jclepro.2015.09.046

NR 21  
TC 1  
Z9 1  
U1 2  
U2 15  
PU ELSEVIER SCI LTD  
PI OXFORD  
PA THE BOULEVARD, LANGFORD LANE, KIDLINGTON, OXFORD OX5 1GB, OXON, ENGLAND  
SN 0959-6526  
EI 1879-1786  
J9 J CLEAN PROD  
JI J. Clean Prod.  
PD OCT 1  
PY 2016  
VL 133  
BP 826  
EP 834  
DI 10.1016/j.jclepro.2016.05.081  
PG 9  
WC GREEN & SUSTAINABLE SCIENCE & TECHNOLOGY; Engineering, Environmental;  
Environmental Sciences  
SC Science & Technology - Other Topics; Engineering; Environmental Sciences  
& Ecology  
GA DT5TJ  
UT WOS:000381545200076  
DA 2018-05-03  
ER

PT J  
AU Klockner, CA  
Nayum, A  
AF Klockner, Christian A.

Nayum, Alim

TI Specific Barriers and Drivers in Different Stages of Decision-Making  
about Energy Efficiency Upgrades in Private Homes

SO FRONTIERS IN PSYCHOLOGY

LA English

DT Article

DE energy efficiency upgrades; private homes; transtheoretical model;  
decision stages; barriers; drivers

ID REGULATED BEHAVIORAL-CHANGE; PRO-ENVIRONMENTAL BEHAVIOR; CARBON  
FOOTPRINT; MODEL; DETERMINANTS; WILLINGNESS

AB Energy efficiency upgrades of privately owned homes like adding to the insulation layers in the walls, roof or floor, or replacing windows with more efficiently insulated versions can contribute significantly to reducing the energy impact of the building sector and thus also the CO<sub>2</sub> footprint of a household. However, even in countries like Norway that have a rather high rate of renovation, energy upgrades are not always integrated into such a refurbishment project. This study tests which structural and internal psychological barriers hinder and which drivers foster decision-making to implement such measures, once a renovation project is planned. With a theoretical background in stage-based models of decision-making 24 barriers and drivers were tested for their specific effect in the stages of decision-making. The four stages of decision-making assumed in this study were (1) "not being in a decision mode," (2) "deciding what to do," (3) "deciding how to do it," and (4) "planning implementation." Based on an online survey of 3787 Norwegian households, it was found that the most important barriers toward deciding to implement energy efficiency upgrades were not owning the dwelling and feeling the right time had not come yet. The most important drivers of starting to decide were higher expected comfort levels, better expected living conditions, and an expected reduction of energy costs. For the transition from deciding what to do to how to do it, not managing to make a decision and feeling the right point in time has not come yet were the strongest barriers, easily accessible information and an expected reduction of energy costs were the most important drivers. The final transition from deciding how to do the upgrades to planning implementation was driven by expecting a payoff within a reasonable time frame and higher expected comfort levels; the most important barriers were time demands for supervising contractors and-again-a feeling that the right point in time has not come yet. Implications for policy-making and marketing are discussed.

C1 [Klockner, Christian A.; Nayum, Alim] Norwegian Univ Sci & Technol, Dept Psychol, Trondheim, Norway.

RP Klockner, CA (reprint author), Norwegian Univ Sci & Technol, Dept Psychol, Trondheim, Norway.

EM christian.klockner@ntnu.no

FU Norwegian Energy Agency Enova

FX This research was funded by the Norwegian Energy Agency Enova.

CR AJZEN I, 1991, ORGAN BEHAV HUM DEC, V50, P179, DOI 10.1016/0749-5978(91)90020-T

Bamberg S., 2012, ENV PSYCHOL INTRO, P267

Bamberg S, 2007, J APPL SOC PSYCHOL, V37, P1757, DOI 10.1111/j.1559-1816.2007.00236.x

Bamberg S, 2007, J ENVIRON PSYCHOL, V27, P14, DOI 10.1016/j.jenvp.2006.12.002

Bamberg S, 2013, J ENVIRON PSYCHOL, V34, P151, DOI 10.1016/j.jenvp.2013.01.002

Bamberg S, 2013, J ENVIRON PSYCHOL, V33, P68, DOI 10.1016/j.jenvp.2012.10.001

Banfi S, 2008, ENERG ECON, V30, P503, DOI 10.1016/j.eneco.2006.06.001

BLACK JS, 1985, J APPL PSYCHOL, V70, P3, DOI 10.1037//0021-9010.70.1.3

Boardman B, 2004, ENERG POLICY, V32, P1921, DOI 10.1016/j.enpol.2004.03.021

Cirman A., 2011, ENHR C TOUL

Farsi M, 2010, ENERG POLICY, V38, P3078, DOI 10.1016/j.enpol.2010.01.048

Friege J, 2014, RENEW SUST ENERG REV, V39, P196, DOI 10.1016/j.rser.2014.07.091

Fujii S, 2006, J ENVIRON PSYCHOL, V26, P262, DOI 10.1016/j.jenvp.2006.09.003

Hauge AL, 2013, ENERG EFFIC, V6, P315, DOI 10.1007/s12053-012-9175-5

Hertwich EG, 2009, ENVIRON SCI TECHNOL, V43, P6414, DOI 10.1021/es803496a

Jakob M, 2006, ENERG POLICY, V34, P172, DOI 10.1016/j.enpol.2004.08.039

Jakob M., 2007, DRIVERS BARRIERS ENE

Klockner Christian A., 2013, International Journal of Environment and Sustainable Development, V12, P396

Klockner C. A., 2014, INT J SUSTAIN BUILD, V5, P222, DOI DOI 10.1080/2093761X.2014.954652

Klockner CA, 2015, DETERMINANTS UPGRADI

Klockner C. A., 2016, PSYCHOL STRUCTURAL F

Klockner CA, 2014, TRANSPORT RES F-TRAF, V24, P103, DOI 10.1016/j.trf.2014.04.015  
 Klockner CA, 2013, GLOBAL ENVIRON CHANG, V23, P1028, DOI 10.1016/j.gloenvcha.2013.05.014  
 Lee WL, 2004, PROG ENERG COMBUST, V30, P477, DOI 10.1016/j.peccs.2004.03.002  
 Matschoss K., 2013, RETHINK RENEW RESTAR  
 Moran MD, 2003, OIKOS, V100, P403, DOI 10.1034/j.1600-0706.2003.12010.x  
 Nair G, 2010, ENERG POLICY, V38, P2956, DOI 10.1016/j.enpol.2010.01.033  
 Organ Samantha, 2013, Structural Survey, V31, P101, DOI 10.1108/02630801311317527  
 Prochaska J. O., 1994, TRANSTHEORETICAL APP  
 Prochaska J. O., 1992, SELF CHANGE SOCIAL P, P87, DOI [10.1007/978-1-4612-2922-3\_5, DOI 10.1007/978-1-4612-2922-3\_5]  
 Rosenow J, 2013, P I CIVIL ENG-ENERGY, V166, P127, DOI 10.1680/ener.13.00001  
 Schipper L, 1985, COMING COLD ENERGY W  
 Schwartz S. H., 1981, ALTRUISM HELP BEHAV, P189  
 Shorrock L, 2001, P EUR COUNC EN EFF E  
 Steen-Olsen K, 2016, J IND ECOL, V20, P582, DOI 10.1111/jiec.12405  
 Stern PC, 2000, J SOC ISSUES, V56, P407, DOI 10.1111/0022-4537.00175  
 Vergragt PJ, 2012, TECHNOL ANAL STRATEG, V24, P407, DOI 10.1080/09537325.2012.663964  
 Weiss J, 2012, ENERG POLICY, V44, P406, DOI 10.1016/j.enpol.2012.02.006  
 Wilson C., 2013, TYNDALL CTR CLIMATE  
 Zundel S, 2011, J CONSUMER POLICY, V34, P91, DOI DOI 10.1007/S10603-011-9156-7

NR 40

TC 1

Z9 1

U1 0

U2 7

PU FRONTIERS MEDIA SA

PI LAUSANNE

PA PO BOX 110, EPFL INNOVATION PARK, BUILDING I, LAUSANNE, 1015,  
 SWITZERLAND

SN 1664-1078

J9 FRONT PSYCHOL

J1 Front. Psychol.

PD SEP 8

PY 2016

VL 7

AR 7362

DI 10.3389/fpsyg.2016.01362

PG 14

WC Psychology, Multidisciplinary

SC Psychology

GA DV2BG

UT WOS:000382725200001

OA gold

DA 2018-05-03

ER

PT J

AU Molavi, H

Ardehali, MM

AF Molavi, H.

Ardehali, M. M.

TI Utility demand response operation considering day-of-use tariff and  
 optimal operation of thermal energy storage system for an industrial  
 building based on particle swarm optimization algorithm

SO ENERGY AND BUILDINGS

LA English

DT Article

DE Demand response; Tariff; Time-of-use; Thermal energy storage;

### Optimization

AB Utility demand response (DR) programs and time-of-use (TOU) tariffs are designed to reduce customers loads as well as energy costs during peak periods in commercial and residential buildings. While TOU tariff is structured based on dividing a day into several periods with different corresponding electricity prices, the concept can be expanded for developing day-of-use (D-TOU) tariff, where different days in a week are treated differently, as experienced for industrial loads. Further, the advantages of such tariffs can be realized when demand side management technologies such as thermal energy storage (TES) in conjunction with heat pump systems are utilized. The goal of this study is to evaluate the effects of D-TOU tariff with four day types in a week on DR programs operation for an industrial customer with TES charged by an electric heat pump. The four day types considered in a week include Monday as start-up working day, Tuesday to Friday as regular working days, Saturday as half-day working day, and Sunday as weekend day. To achieve the goal, TOU and D-TOU tariffs are modeled and the TES system equipment capacities and operation with cooling and heating tanks are optimized based on particle swarm optimization for an industrial building load. The results for various pricing scenarios show that D-TOU tariff can be beneficial to the utility company and customer, as peak loads for electricity in day types 1, 2, 3 and 4 are reduced by 54, 52, 47 and 44% and customer costs for electricity cooling are lowered by 14, 13, 11 and 8%. (C) 2016 Elsevier B.V. All rights reserved.

C1 [Molavi, H.; Ardehali, M. M.] Amirkabir Univ Technol, Polytech Tehran, Dept Elect Engn, Energy Syst Lab, Ctr Excellence Power Syst, Tehran, Iran.

RP Ardehali, MM (reprint author), Amirkabir Univ Technol, Polytech Tehran, Dept Elect Engn, Energy Syst Lab, Ctr Excellence Power Syst, Tehran, Iran.

EM ardehali@aut.ac.ir

CR Aalami H., 2009, EPECS C IEEE

Aalami HA, 2010, ELECTR POW SYST RES, V80, P426, DOI 10.1016/j.epsr.2009.10.007

Aalami HA, 2010, APPL ENERG, V87, P243, DOI 10.1016/j.apenergy.2009.05.041

Aalami H. A, 2008, TRANSM DISTR C EXP I

Abdulaal A, 2016, ENERG BUILDINGS, V110, P269, DOI 10.1016/j.enbuild.2015.10.046

Albadi M. H, 2007, POW ENG SOC GEN M IE

Ardehali M.M., 2002, METFS01007 U IOW DEP

Ardehali M.M., 2008, ENERG ENG, V105, P44

Ardehali M. M., 2003, ASHRAE T, V109, P111

Barwig F.E., 2002, NATL BUILDING CONTRO

Borenstein S, 2005, ENERGY J, V26, P93

Cappers P, 2010, ENERGY, V35, P1526, DOI 10.1016/j.energy.2009.06.029

Huang Cheng Lung, 2006, EXPERT SYST APPL, V31, P231

Datchanamoorthy S., 2011, SMART GRID COMM C IE

Faria P, 2011, ENERGY, V36, P5374, DOI 10.1016/j.energy.2011.06.049

Faruqui A., 2005, ELECT J, V18, P1040, DOI [10.1016/j.tej.2005.04.005, DOI 10.1016/J.TEJ.2005.04.005]

Faruqui A, 2010, ENERG POLICY, V38, P6222, DOI 10.1016/j.enpol.2010.06.010

Federal Energy Regulatory Commission, 2008, ASS DEM RESP ADV MET

Hassan R., 2000, 13 AIAA ASME AHS AD

Haupt R. L., 2004, PRACTICAL GENETIC AL

Hu W., 2010, POW ENG C IEEE

Jianhui W., 2009, ENERGY, V87, P243

Jorge V., 2012, APPL ENERG, V96, P122

Kennedy J., 1995, IEEE INT C NEUR NETW

Kim D.H., 2009, INT C POW EN PE CON

Kim JH, 2011, ENERGY, V36, P873, DOI 10.1016/j.energy.2010.12.027

Kirschen DS, 2000, IEEE T POWER SYST, V15, P612, DOI 10.1109/59.867149

Kirschen DS, 2003, IEEE T POWER SYST, V18, P520, DOI 10.1109/TPWRS.2003.810692

Kirschen DS, 2004, FUNDAMENTALS POWER S

Murphy MD, 2015, APPL ENERG, V149, P392, DOI 10.1016/j.apenergy.2015.03.006

Omagari Y., 2010, IEEE SUST ALT EN C

Omagari Y., 2008, IEEE POW EN SOC GEN

Rahimi F, 2010, IEEE T SMART GRID, V1, P82, DOI 10.1109/TSG.2010.2045906

Saele H, 2011, IEEE T SMART GRID, V2, P102, DOI 10.1109/TSG.2010.2104165

Schweppe F., 1988, SPOT PRICING ELECT

Shimomura Y, 2014, CIRP ANN-MANUF TECHN, V63, P413, DOI 10.1016/j.cirp.2014.03.117

Tichi SG, 2010, ENERGETICS POLICY, V38, P6240, DOI 10.1016/j.enpol.2010.06.012

U.S. Department of Energy, 2006, BEN DEM RESP EL MARK

Wang Y, 2015, APPL ENERGETICS, V149, P89, DOI 10.1016/j.apenergy.2015.03.118

Wang Y, 2013, ENERGY, V63, P233, DOI 10.1016/j.energy.2013.10.011

Yang L, 2013, INT J PROD ECON, V146, P402, DOI 10.1016/j.ijpe.2013.03.006

NR 41

TC 1

Z9 1

U1 1

U2 12

PU ELSEVIER SCIENCE SA

PI LAUSANNE

PA PO BOX 564, 1001 LAUSANNE, SWITZERLAND

SN 0378-7788

EI 1872-6178

J9 ENERGETICS BUILDINGS

J1 Energy Build.

PD SEP 1

PY 2016

VL 127

BP 920

EP 929

DI 10.1016/j.enbuild.2016.06.056

PG 10

WC Construction & Building Technology; Energy & Fuels; Engineering, Civil

SC Construction & Building Technology; Energy & Fuels; Engineering

GA DT5NH

UT WOS:000381529400080

DA 2018-05-03

ER

PT J

AU Jiang, YF

Liu, X

Liu, FX

Wu, DH

Anumba, CJ

AF Jiang, Yufei

Liu, Xiao

Liu, Fangxiao

Wu, Dinghao

Anumba, Chimay J.

TI An Analysis of BIM Web Service Requirements and Design to Support Energy

Efficient Building Lifecycle

SO BUILDINGS

LA English

DT Article

DE BIM; web service; energy efficient building lifecycle

ID INFORMATION TECHNOLOGY; PERCEIVED USEFULNESS; USER ACCEPTANCE; MODELS;

SYSTEMS; EASE

AB Energy Efficient Building (EEB) design, construction, and operations require the development and sharing of building information among different individuals, organizations, and computer applications. The Representational State Transfer (RESTful) Building Information Modeling (BIM) web service is a solution to enable an effective exchange of data. This paper presents an investigation into the core RESTful web service requirements needed to effectively support the EEB project lifecycle. The requirements include information exchange requirements, distributed collaboration requirements, internal data storage requirements, and partial model query requirements. We also propose a RESTful web service design model on different abstraction layers to enhance the BIM lifecycle in energy efficient building design. We

have implemented a RESTful Application Program Interface (API) prototype on a mock BIMserver to demonstrate our idea. We evaluate our design by conducting a user study based on the Technology Acceptance Model (TAM). The results show that our design can enhance the efficiency of data exchange in EEB design scenarios.

C1 [Jiang, Yufei; Liu, Xiao; Wu, Dinghao] Penn State Univ, Coll Informat Sci & Technol, University Pk, PA 16802 USA.

[Liu, Fangxiao; Anumba, Chimay J.] Penn State Univ, Dept Architectural Engr, University Pk, PA 16802 USA.

RP Jiang, YF (reprint author), Penn State Univ, Coll Informat Sci & Technol, University Pk, PA 16802 USA.

EM yzj107@psu.edu; xv15190@ist.psu.edu; fzl116@psu.edu; dinghao@psu.edu; anumba@enr.psu.edu

CR Adachi Y., 2003, P INT SOC PROD ENH C

ADAMS DA, 1992, MIS QUART, V16, P227, DOI 10.2307/249577

AJZEN I, 1977, PSYCHOL BULL, V84, P888, DOI 10.1037/0033-2909.84.5.888

Allamaraju S., 2010, RESTFUL WEB SERVICES

Associates J.J.H., WELC DOE 2 COM

Azhar S., 2011, LEADERSHIP MANAGE EN, P241, DOI [10.1061/(ASCE)LM.1943-5630.0000127, DOI 10.1061/(ASCE)LM.1943-5630.0000127]

Bazjanac V., 2007, P BUILD SIM 2007 C B

Bazjanac V., 2001, P 2001 BUILD SIM C R

Beetz J., 2010, P CIP W78 C CAIR EG

Beetz J., 2011, P CIP W78 C SOPH ANT

BILGIC T, 1997, P 1997 ASME DES ENG

BuildingSMARTalliance National BIM Standard, 2007, US NAT BUILD INF MOD

Bynum P, 2013, J CONSTR ENG M ASCE, V139, P24, DOI 10.1061/(ASCE)CO.1943-7862.0000560

Campbell DA, 2007, P 12 INT C 3D WEB TE

CAMPOSANO R, 1991, IEEE DES TEST COMPUT, V8, P43, DOI 10.1109/54.75662

Chau P. T. K., 1996, Journal of Management Information Systems, V13, P185

Chau PYK, 1996, INFORM MANAGE-AMSTER, V30, P269, DOI 10.1016/S0378-7206(96)01074-9

Curbera F, 2002, IEEE INTERNET COMPUT, V6, P86, DOI 10.1109/4236.991449

Daum S., 2014, EWORK EBUSINESS ARCH

DAVIS FD, 1989, MANAGE SCI, V35, P982, DOI 10.1287/mnsc.35.8.982

DAVIS FD, 1989, MIS QUART, V13, P319, DOI 10.2307/249008

Davis F. D., 1986, THESIS

DeGraw J.W., 2014, ASHRAE T, V120, P1

Dubler C.R., 2010, P CONSTR RES C ASCE

Eastman C., 2011, BIM HDB GUIDE BUILDI

Emmerich S.J., 2011, P AIVC C BRUSS BELG

Exforsys, 2007, SOA DIS

Fielding R. T., 2000, THESIS

Froese T., 1999, ELECT J INFORM TECHN, V4, P17

Goedert JD, 2008, J CONSTR ENG M ASCE, V134, P509, DOI 10.1061/(ASCE)0733-9364(2008)134:7(509)

Gray J., 1993, T PROCESSING

Hardt D., OAUTH 2 0 AUTHORIZAT

Hirsch A., 2011, NRELCP550049067

Howell I., 2005, LAISERIN LETT, V22, P4

Hu PJ, 1999, J MANAGE INFORM SYST, V16, P91, DOI 10.1080/07421222.1999.11518247

Jiang Y., 2012, P 2012 ASCE INT C CO

Jiang YF, 2015, J INF TECHNOL CONSTR, V20, P518

Kim C, 2013, AUTOMAT CONSTR, V31, P75, DOI 10.1016/j.autcon.2012.11.041

Legner C., 2007, P 2007 EUR C INF SYS

Liu DT, 2001, COMPUT IND, V44, P251, DOI 10.1016/S0166-3615(01)00072-0

Liu F., 2013, P 30 INT C APPL IT A

Liu F., 2014, P 15 INT C COMP CIV

Maile T, 2007, 107 CIFE, V107, P1

Mazairac W, 2013, ADV ENG INFORM, V27, P444, DOI 10.1016/j.aei.2013.06.001

Messner J., BIM PROJECT EXECUTIO

Michelson B. M, 2006, EVENT DRIVEN ARCHITE, DOI [10.1571/bda2-2-06cc, DOI 10.1571/BDA2-2-06CC]

Moon H. J., 2011, P 12 C INT BUILD PER  
 Murugesan San, 2007, IT Professional, V9, P34, DOI 10.1109/MITP.2007.78  
 O'Donnell J., 2011, P SIMBUILD 2011 SYDN  
 Rogers S., BIM IMPLEMENTATION S  
 Smith D. K., 2009, BUILDING INFORM MODE  
 Van Berlo L., BIMSERVER ORG RELEAS  
 Watson A., 2010, P INT C COMP CIV BUI  
 Weise M., 2003, CIB REP, V284, P440  
 yaml.org, YAML 1 2  
 Yan H., 2008, P 12 INT C COMP CIV  
 Young N., 2009, BUSINESS VALUE BIM G  
 Yu N., 2013, P 2013 ASCE INT C CO  
 Zhang SJ, 2013, AUTOMAT CONSTR, V29, P183, DOI 10.1016/j.autcon.2012.05.006

NR 59

TC 1

Z9 1

U1 2

U2 15

PU MDPI AG

PI BASEL

PA POSTFACH, CH-4005 BASEL, SWITZERLAND

SN 2075-5309

J9 BUILDINGS

JI Buildings

PD JUN

PY 2016

VL 6

IS 2

AR 20

DI 10.3390/buildings6020020

PG 24

WC Construction & Building Technology

SC Construction & Building Technology

GA DR6GO

UT WOS:000380000500009

OA gold

DA 2018-05-03

ER

PT J

AU Simanaviciene, Z

Volochovic, A

Cibinskiene, A

AF Simanaviciene, Zaneta

Volochovic, Andzej

Cibinskiene, Akvile

TI Features of Energy Saving Potential in Lithuanian Households

SO EQUILIBRIUM-QUARTERLY JOURNAL OF ECONOMICS AND ECONOMIC POLICY

LA English

DT Article

DE energy saving potential; households; evaluation; behavior change

AB Scientists from all over the world recognize that saving energy in households is currently a very relevant topic. Energy resources are a very important factor for each country's economic vitality. Not only the country's replenishment in energy resources is important, but also the reduction of energy consumption volume. The objective of the study: to assess the energy savings in households potential, applying the measures aimed at the behavior change of the population through energy-saving direction. Methodology: the impact of behavior change of the population measures is assessed according to the criteria of efficiency and effectiveness. In order to assess the potential for energy savings in households, the following methods,



such as an experiment, the control group formation scenario, household questionnaire, were used. The questionnaire was designed to supplement the experiment, in order to gain deeper knowledge of the household, to obtain more detailed information about the nature of the behavior, to identify barriers to behavior change, and to select a control group of households to carry out the experiment. Data, results and main contribution of the paper: research shows that people's behavior related to energy saving is influenced by a number of macro-level and micro-level factors. In the article the assumptions of the changing behavior of population are analyzed and the assessment of the specific measures aimed at the behavior changes of the population and their implementation impact is conducted.

C1 [Simanaviciene, Zaneta; Volochovic, Andzej; Cibinskiene, Akvile] Kaunas Univ Technol, Gedimino G 50, LT-44239 Kaunas, Lithuania.

UADBB Insurance Brokers Grp, Gedimino Pr 32-3, LT-01104 Vilnius, Lithuania.

RP Simanaviciene, Z (reprint author), Kaunas Univ Technol, Gedimino G 50, LT-44239 Kaunas, Lithuania.

EM zaneta.simanaviciene@ktu.lt; a.volochovicus@gmail.com;

akvile.cibinskiene@ktu.lt

CR Abrahamse W., 2007, ENV PSYCHOL, V27

Abrahamse W., 2011, HUMAN ECOLOGY REV, V18

Balezentis A., 2011, ENERGY POLICY, V39

Bamberg S., 2003, ENV BEHAV, V35

Black J. S., 1985, J APPL SOCIAL PSYCHO, V28

Brownstone D., 2000, TRANSPORTATION RES, V34

Cibinskiene A., 2011, EC MANAGEMENT, V16

Darby S., 2006, EFFECTIVENESS FEEDBA

De Young R., 1993, ENV BEHAV, V25

Dietz T., 2009, P NATL ACAD SCI USA, V106, P18452, DOI 10.1073/pnas.0908738106

Dulleck U., 2004, ENERGY POLICY, V32

Ek K., 2005, ENERGY POLICY, V33

Faiers A.C., 2006, ENERGY POLICY, V34

Faraqui A., 2010, ENERGY, V4

Garmendia E., 2010, ECOLOGICAL EC, V69

Gifford R., 2011, AM PSYCHOL, V66, P290, DOI 10.1037/a0023566

Godwy J. M., 2007, RENSSLAER WORKING P

Homans G. C., 1961, SOCIAL BEHAV ITS ELE

Iyer M., 2006, ENERGY BUILDINGS, V8

Martinsson J., 2011, ENERGY POLICY, V39

Mohr D., 2000, J SOCIAL ISSUES, V56

Nair G., 2010, ENERGY POLICY, V38

Noeren D., 2007, CO2 EMISSION REDUCTI

Olson M. E., 1981, J SOCIAL ISSUES, V37

Poortiga W., 2003, J ENERGY PSYCHOL, V24

Steg L., 2008, ENERGY POLICY, V36

Stern P., 2000, J SOCIAL ISSUES, V56

Streimikiene D., 2012, RENEWABLE SUSTAINABL, V16

Wilson Ch., 2007, MODELS DECISION MAKI

Zarnikau J., 2003, ENERGY POLICY, V31

NR 30

TC 1

Z9 1

U1 3

U2 4

PU INST ECONOMIC RESEARCH-POLAND

PI TORUN

PA UL GAGARINA 13A, TORUN, 87100, POLAND

SN 1689-765X

EI 2353-3293

J9 EQUILIBRIUM

J1 Equilibrium

PD MAR

PY 2016

VL 11  
 IS 1  
 BP 145  
 EP 157  
 DI 10.12775/EQUIL.2016.007  
 PG 13  
 WC Economics  
 SC Business & Economics  
 GA ET05J  
 UT WOS:000399973700007  
 OA gold  
 DA 2018-05-03  
 ER

PT S

AU Gohl, N

Bauer, D

Druck, H

AF Gohl, Natalie

Bauer, Dan

Drueck, Harald

BE Yesilata, B

TI 1to10-a cost-effective heat supply concept with low primary energy consumption for multi-family houses and small residential areas

SO PROCEEDINGS OF THE 4TH INTERNATIONAL CONFERENCE ON SOLAR HEATING AND COOLING FOR BUILDINGS AND INDUSTRY (SHC 2015)

SE Energy Procedia

LA English

DT Proceedings Paper

CT 4th International Conference on Solar Heating and Cooling for Buildings and Industry (SHC)

CY DEC 02-04, 2015

CL Istanbul, TURKEY

DE solar thermal energy; shallow geothermal energy; multi-family houses; heat supply concept

AB This contribution introduces an innovative, sustainable heat supply concept. This concept, which is based on solar thermal and geothermal heat generation and advanced heat storage technologies, will be realized for the first time as a heat supply system for new apartment buildings. The key feature of the system is the fact, that on an annual basis only 1 kWh of electricity will be required to generate 10 kWh of heat. This contribution is focused on the presentation of the above described, newly developed system concept as well as first results of the design and simulation studies for a pilot heat supply system that is planned to be realized in a complex of three multi-family houses within a total living area of over 3 500 m<sup>2</sup> in the German city Crailsheim, which is located 80 km north-east of Stuttgart.

The development of the concept is part of the research project '1to10 - Development, testing and demonstration of a sustainable, standardized solar-geothermal heat supply concept'. In the conceptual design phase of the project, theoretical work for the realization of such systems is performed. (C) 2016 The Authors. Published by Elsevier Ltd.

C1 [Gohl, Natalie; Bauer, Dan; Drueck, Harald] Univ Stuttgart, Res & Testing Ctr Thermal Solar Syst TZS, Inst Thermodynam & Thermal Engn ITW, Pfaffenwaldring 6, D-70550 Stuttgart, Germany.

RP Gohl, N (reprint author), Univ Stuttgart, Res & Testing Ctr Thermal Solar Syst TZS, Inst Thermodynam & Thermal Engn ITW, Pfaffenwaldring 6, D-70550 Stuttgart, Germany.

EM natalie.gohl@itw.uni-stuttgart.de

CR [Anonymous], 2014, RAUGEO HEL PE XA PRO  
 Stryi-Hipp G, 2010, FORSCHUNGSSTRATEGIE

NR 2

TC 1

Z9 1

U1 0

U2 0  
 PU ELSEVIER SCIENCE BV  
 PI AMSTERDAM  
 PA SARA BURGERHARTSTRAAT 25, PO BOX 211, 1000 AE AMSTERDAM, NETHERLANDS  
 SN 1876-6102  
 J9 ENRGY PROCED  
 PY 2016  
 VL 91  
 BP 460  
 EP 466  
 DI 10.1016/j.egypro.2016.06.179  
 PG 7  
 WC Construction & Building Technology; Energy & Fuels  
 SC Construction & Building Technology; Energy & Fuels  
 GA BG2OF  
 UT WOS:000387506400056  
 OA gold  
 DA 2018-05-03  
 ER

PT B  
 AU Salman, L  
     Salman, S  
     Jahangirian, S  
     Abraham, M  
     German, F  
     Blair, C  
     Krenz, P

AF Salman, Laila  
     Salman, Safa  
     Jahangirian, Saeed  
     Abraham, Mehdi  
     German, Fred  
     Blair, Charlotte  
     Krenz, Peter

GP IEEE  
 TI Energy Efficient IoT-Based Smart Home  
 SO 2016 IEEE 3RD WORLD FORUM ON INTERNET OF THINGS (WF-IOT)  
 LA English  
 DT Proceedings Paper  
 CT IEEE 3rd World Forum on Internet of Things (WF-IoT)  
 CY DEC 12-14, 2016  
 CL Reston, VA

SP IEEE, DarkMatter, LoRa Alliance, Comcast MachineQ, ARM  
 DE IoT; Smart Home; Energy Efficient; Multi-band Antenna; HVAC; LED;  
     Compact Printed Antennas; Thermal Management; Energy Efficiency

AB Smart Home technology is the future of residential related technology which is designed to deliver and distribute number of services inside and outside the house via networked devices in which all the different applications & the intelligence behind them are integrated and interconnected. These smart devices have the potential to share information with each other given the permanent availability to access the broadband internet connection. Hence, Smart Home Technology has become part of IoT (Internet of Things). In this work, a home model is analyzed to demonstrate an energy efficient IoT based smart home. Several Multiphysics simulations were carried out focusing on the kitchen of the home model. A motion sensor with a surveillance camera was used as part of the home security system. Coupled with the home light and HVAC control systems, the smart system can remotely control the lighting and heating or cooling when an occupant enters or leaves the kitchen.

C1 [Salman, Laila; Salman, Safa; Jahangirian, Saeed; Abraham, Mehdi; German, Fred; Blair, Charlotte; Krenz, Peter] ANSYS Inc, Canonsburg, PA 15317 USA.

RP Salman, L (reprint author), ANSYS Inc, Canonsburg, PA 15317 USA.  
 EM Laila.Salman@ANSYS.com; Safa.Salman@ANSYS.com;  
 Saeed.Jahangirian@ANSYS.com; Mehdi.Anraham@ANSYS.com;  
 Fred.German@ANSYS.com; Charlotte.Blair@ANSYS.com; Peter.Krenz@ANSYS.com

CR [Anonymous], 2016, ANSYS TM VERSION 17  
 Chan M, 2009, MATURITAS, V64, P90, DOI 10.1016/j.maturitas.2009.07.014  
 El-Basioni B. M., 2013, IJAIEM, V2  
 Kelly SDT, 2013, IEEE SENS J, V13, P3846, DOI 10.1109/JSEN.2013.2263379  
 Pham N. T., 2004, IEEE AP S INT S, V2, P1451  
 Piyare Rajeev, 2013, INT J INTERNET THING  
 Piyare R., 2011, IEEE 15 INT S CONS E  
 Rana Jitendra Rajendra, 2010, ZIGBEE BASED HOME AU  
 Sagar K. N. Vinay, 2015, IRJET, V02, p0 966  
 SRISKANTHAN N, 2002, J MICROPROCESSORS MI, V26, P281, DOI DOI 10.1016/S0141-9331(02)00039-X  
 Vasylichenko A., IEEE ANTENNA PROPAGA, V51, p23

NR 11  
 TC 1  
 Z9 1  
 U1 2  
 U2 3  
 PU IEEE  
 PI NEW YORK  
 PA 345 E 47TH ST, NEW YORK, NY 10017 USA  
 BN 978-1-5090-4130-5  
 PY 2016  
 BP 526  
 EP 529  
 PG 4

WC Computer Science, Artificial Intelligence; Computer Science,  
 Interdisciplinary Applications  
 SC Computer Science  
 GA BH3IX  
 UT WOS:000399698600090  
 DA 2018-05-03  
 ER

PT S  
 AU Tsynaeva, AA  
 Nikitin, MN  
 Tsynaeva, EA  
 AF Tsynaeva, Anna A.  
 Nikitin, Maksim N.  
 Tsynaeva, Ekaterina A.

BE Kirschke, H  
 TI The technology of automatic control of heat consumption in buildings  
 SO XXV POLISH - RUSSIAN - SLOVAK SEMINAR -THEORETICAL FOUNDATION OF CIVIL  
 ENGINEERING  
 SE Procedia Engineering  
 LA English  
 DT Proceedings Paper  
 CT 25th Russian-Polish-Slovak Seminar on Theoretical Foundation of Civil  
 Engineering  
 CY JUL 11-16, 2016  
 CL Zilina, SLOVAKIA  
 SP Univ Zilina  
 DE Buildings; Heat consumption; Automatic control; Investigation;  
 Efficiency  
 ID ENERGY

AB The paper is devoted to development and research of buildings' heat consumption management technology. Schematics of heat consumption management for CHP and low-grade as heat sources discussed. Analysis of management system capability during spring and autumn seasons conducted. The research was made with numerical approach. Adequacy of implemented models and methods was proved. Engineering and operational recommendations were made for management of buildings' heat consumption systems. Higher efficiency of buildings was proved while implementing developed technology regardless of heat sources. Management technology efficiency showed dependency on its schematics, heat-carrier temperature and temperature of low-grade heat source (for schematics with heat pump). (C) 2016 The Authors. Published by Elsevier Ltd.

C1 [Tsynaeva, Anna A.; Nikitin, Maksim N.] Samara State Univ Architecture & Civil Engrn, Molodogvardeyskaya St 194, Samara 443001, Russia.

[Tsynaeva, Ekaterina A.] Ulyanovsk State Tech Univ, Severnyi Venec Str 32, Ulyanovsk 432027, Russia.

RP Tsynaeva, AA (reprint author), Samara State Univ Architecture & Civil Engrn, Molodogvardeyskaya St 194, Samara 443001, Russia.

EM a.tsynaeva@rambler.ru

OI Tsynaeva, Anna/0000-0003-4973-6169; Nikitin, Maxim/0000-0002-2535-6076

CR Balzannikov M. I., 2012, P MOSCOW STATE U CIV, V7, P119

Balzannikov M. I., 2013, P SAMARA STATE U ARC, V31, P336

Chwieduk D, 2003, APPL ENERG, V76, P211, DOI 10.1016/S0306-2619(03)00059-X

Crawley DB, 2008, BUILD ENVIRON, V43, P661, DOI 10.1016/j.buildenv.2006.10.027

Dounis AI, 2009, RENEW SUST ENERG REV, V13, P1246, DOI 10.1016/j.rser.2008.09.015

Gavrilova A. A., 2012, B SAMARA STATE TU SE, V2, P143

Kartashova A. O., 2015, B SAMARA STATE U ARC, V1, P90

Koval'nogov N., 2006, B ULSTU, V1, P56

Oldewurtel F, 2012, ENERG BUILDINGS, V45, P15, DOI 10.1016/j.enbuild.2011.09.022

Privara S, 2011, ENERG BUILDINGS, V43, P564, DOI 10.1016/j.enbuild.2010.10.022

Saburov V. V., 2014, B SAMARA STATE U ARC, V4, P107

Sokolov E. Y., 2009, DISTRICT HEATING HEA

Tsynaeva Anna, 2016, Materials Science Forum, V856, P297, DOI 10.4028/www.scientific.net/MSF.856.297

Tsynaeva A., 2015, B ULSTU, V1, P60

Tsynaeva A., 2011, MATH METHODS MODELS, P282

Tsynaeva E., 2015, SEQUENCE ANAL RELATE, P235

Tsynaeva A., 2007, Patent of invention, Patent No. [2340834. 34, 2340834]

Zhukhovitskij D., 2007, Patent of invention, Patent No. [2334913. 27, 2334913]

Zhukhovitskij D., 2007, Patent of invention, Patent No. [2334912. 27, 2334912]

NR 19

TC 1

Z9 1

U1 2

U2 3

PU ELSEVIER SCIENCE BV

PI AMSTERDAM

PA SARA BURGERHARTSTRAAT 25, PO BOX 211, 1000 AE AMSTERDAM, NETHERLANDS

SN 1877-7058

J9 PROCEDIA ENGINEER

PY 2016

VL 153

BP 785

EP 790

DI 10.1016/j.proeng.2016.08.243

PG 6

WC Engineering, Civil

SC Engineering

GA BF7BP

UT WOS:000383946300125

OA gold

DA 2018-05-03

ER

PT J

AU Xu, P

Shen, Y

Chen, L

Mao, JC

Chang, E

Ji, Y

AF Xu, Peng

Shen, Yang

Chen, Lu

Mao, Jiachen

Chang, Eric

Ji, Ying

TI Assessment of energy-saving technologies retrofitted to existing public buildings in China

SO ENERGY EFFICIENCY

LA English

DT Article

DE Commercial building; Energy simulation; Energy-saving retrofit; Economic assessment

AB This study compared and analyzed both the energy savings and cost-effectiveness of various energy-saving technologies retrofitted to common buildings in China. Base models for an office and store building, set in representative climate zones of China-Beijing, Shanghai, and Guangzhou-were established and calibrated in EnergyPlus, a building energy simulation software program. Various energy-saving technologies were then applied to these models in EnergyPlus to calculate the overall energy savings under different climate conditions. In addition, a payback analysis was performed to determine the cost-effectiveness of each technology. The final results of this study can serve as a preliminary reference for selecting effective and economical energy-saving technologies to retrofit existing public buildings.

C1 [Xu, Peng; Shen, Yang; Chen, Lu; Mao, Jiachen; Chang, Eric; Ji, Ying] Tongji Univ, Coll Mech Engn, Shanghai 201804, Peoples R China.

RP Xu, P (reprint author), Tongji Univ, Coll Mech Engn, Shanghai 201804, Peoples R China.

EM xupeng@tongji.edu.cn

OI Mao, Jiachen/0000-0003-0504-6529

CR Ecofys for EURIMA, 2005, COST EFF CLIM PROT E

Ecofys for EURIMA, 2004, MIT CO2 EM BUILD STO

Fang G., 2007, THESIS CHONGQING U

Griffith B., 2007, NRELTP55041957

Jiang Y., 2007, CONSTRUCTION SCI TEC, P26

Kneifel J, 2010, ENERG BUILDINGS, V42, P333, DOI 10.1016/j.enbuild.2009.09.011

Ma ZJ, 2012, ENERG BUILDINGS, V55, P889, DOI 10.1016/j.enbuild.2012.08.018

Nikolaidis Y, 2009, APPL ENERG, V86, P2550, DOI 10.1016/j.apenergy.2009.04.029

Long W., 2008, OPTIMUM ANAL BUILDIN, V38, P42

Xie Z., 1999, ENERGY SAVING, P25

Hua J. S., 2012, HEATING VENTILATING

Xue Z.F., 2004, HEATING VENTILATING, V34, P8

Yang S., 2008, 10 NAT BUILD PHYS C, V74

[Anonymous], 2002, INT PERFORMANCE MEAS, V1

NR 14

TC 1

Z9 1

U1 2

U2 12

PU SPRINGER

PI DORDRECHT

PA VAN GODEWIJCKSTRAAT 30, 3311 GZ DORDRECHT, NETHERLANDS

SN 1570-646X

EI 1570-6478

J9 ENER EFFIC  
JI Energy Effic.  
PD JAN  
PY 2016  
VL 9  
IS 1  
BP 67  
EP 94  
DI 10.1007/s12053-015-9350-6  
PG 28  
WC GREEN & SUSTAINABLE SCIENCE & TECHNOLOGY; Energy & Fuels; Environmental Studies  
SC Science & Technology - Other Topics; Energy & Fuels; Environmental Sciences & Ecology  
GA DC1RC  
UT WOS:000368993200004  
DA 2018-05-03  
ER

PT S  
AU Yang, Z  
Becerik-Gerber, B  
AF Yang, Zheng  
Becerik-Gerber, Burcin  
BE Yan, J  
Chen, B  
Yang, J  
TI How Does Building Occupancy Influence Energy Efficiency of HVAC Systems?  
SO CUE 2015 - APPLIED ENERGY SYMPOSIUM AND SUMMIT 2015: LOW CARBON CITIES AND URBAN ENERGY SYSTEMS  
SE Energy Procedia  
LA English  
DT Proceedings Paper  
CT Applied Energy Symposium and Summit - Low Carbon Cities and Urban Energy Systems (CUE)  
CY NOV 15-17, 2015  
CL Fuzhou, PEOPLES R CHINA  
SP Appl Energy, Appl Energy Innovat Inst, China Assoc Sci & Technol HOME Program, Fujian Assoc Sci & Technol, Chinese Soc Engr Thermophys, Beijing Inst Technol, Tianjin Univ, Malardalen Univ, Future Energy Profile  
DE building occupancy; HVAC system; energy efficiency; occupancy characteristics; commercial building; loads  
ID SIMULATION  
AB Occupancy (presence and number of occupants) is one of the most important factors impacting energy efficiency of HVAC systems as occupancy determines heating/cooling loads on the demand side by varying conditioning periods and settings. Despite the high volume of research activities in demand-driven HVAC controls, how and when occupancy should be linked with heating/cooling loads for sustained and maximum efficiency are still not clear as occupancy is stochastic in nature, and there exists heat transfer and balance among zones, as well as heat gain and loss through a building's envelope. There is no solution to date that can be directly applied in different buildings with different HVAC systems and occupancies. This paper systematically investigates how the occupancy influences the energy efficiency of HVAC systems. Specifically, the influence is analyzed from three perspectives of occupancy transitions, variations, and heterogeneity. The results demonstrated the energy significance of the three perspectives and provided the general ways of quantifying the influences of occupancy. (C) 2016 The Authors. Published by Elsevier Ltd.  
C1 [Yang, Zheng; Becerik-Gerber, Burcin] Univ Southern Calif, Dept Civil & Environm Engr, Innovat Integrated Informat Lab, 3620 South Vermont Ave, Los Angeles, CA 90089 USA.

RP Yang, Z (reprint author), Univ Southern Calif, Dept Civil & Environm Engr, Innovat Integrated Informat Lab, 3620 Sourth Vermont Ave, Los Angeles, CA 90089 USA.

RI Becerik-Gerber, Burcin/D-6897-2013

OI Becerik-Gerber, Burcin/0000-0001-8648-0989

CR Duarte C, 2013, ENERGBUILDINGS, V67, P587, DOI 10.1016/j.enbuild.2013.08.062

Erickson VL, 2009, 1 ACM BUILDSYS INT C

Hoes P, 2009, ENERGBUILDINGS, V41, P295, DOI 10.1016/j.enbuild.2008.09.008

Martani C, 2012, ENERGBUILDINGS, V47, P584, DOI 10.1016/j.enbuild.2011.12.037

Wang C, 2011, BUILDING SIMULATION, V4, P169

Yang Z, 2015, 1 INT S SUST HUM BUI

Yang Z, 2015, APPL ENERGBUILDINGS, V149, P415, DOI 10.1016/j.apenergy.2015.03.048

Yang Z, 2014, SIMUL-T SOC MOD SIM, V90, P960, DOI 10.1177/0037549713489918

Yang Z, 2014, ENERGBUILDINGS, V78, P113, DOI 10.1016/j.enbuild.2014.04.002

NR 9

TC 1

Z9 1

U1 2

U2 3

PU ELSEVIER SCIENCE BV

PI AMSTERDAM

PA SARA BURGERHARTSTRAAT 25, PO BOX 211, 1000 AE AMSTERDAM, NETHERLANDS

SN 1876-6102

J9 ENRGY PROCED

PY 2016

VL 88

BP 775

EP 780

DI 10.1016/j.egypro.2016.06.111

PG 6

WC Energy & Fuels

SC Energy & Fuels

GA BG3KS

UT WOS:000387975200121

OA gold

DA 2018-05-03

ER

PT J

AU Shatat, M

Tetlow, D

Riffat, S

AF Shatat, Mahmoud

Tetlow, David

Riffat, Saffa

TI The retrofitting of an old style semi-detached house for energy

reduction and carbon savings under the UK climate

SO INTERNATIONAL JOURNAL OF LOW-CARBON TECHNOLOGIES

LA English

DT Article

DE climate change; building retrofit; energy consumption; greenhouse gases

AB The impact of climatic change through greenhouse gas emission is a recognized major global crisis.

Energy use in residential and commercial buildings is a major part of the total consumption in European countries and is estimated to be similar to 40% of the total load. Currently, the concept of building retrofit has become a top priority for the UK government in order to meet the national plans for reducing CO<sub>2</sub> emissions by 80% compared with 1990 levels by 2050. This study presents the simulation results for a case study of energy and CO<sub>2</sub> emission savings of a nineteenth century semi-detached building in the UK. The building was refurbished to high standards of energy efficiency, with four simulation scenarios developed for analysis: As-built, As-built 1965, As-reality and post-retrofit. DesignBuilder software was used to



simulate the annual energy consumption and carbon emissions in all cases. In addition to this, thermal imaging and airtightness tests were conducted and the results were used to validate the models. The post-retrofit results showed there is a significant reduction in energy consumption that exceeded 80% with carbon emissions being reduced above 70%. Economic analysis of each retrofit scenario was then undertaken, and results showed payback varied between 9 and 40 years due to the fluctuation in fuel prices and construction retrofit materials. The models indicate performance of the building post-retrofit can be significantly improved in terms of energy reduction and CO<sub>2</sub> emission savings. Further research is being performed to improve performance through field monitoring and installation of innovative retrofit technologies.

C1 [Shatat, Mahmoud; Tetlow, David; Riffat, Saffa] Univ Nottingham, Fac Engr, Dept Architecture & Built Environm, Nottingham NG7 2RD, England.

RP Shatat, M (reprint author), Univ Nottingham, Fac Engr, Dept Architecture & Built Environm, Nottingham NG7 2RD, England.

EM mahmoodshatat@hotmail.com

CR Banfill Phil, 2012, Structural Survey, V30, P267, DOI 10.1108/02630801211241829

[Anonymous], 2013, ENGL HOUS SURV HEAD

DTI, 2008, DIG UK EN STAT

Maidment CD, 2014, ENERG POLICY, V65, P583, DOI 10.1016/j.enpol.2013.10.054

Milne G, 2000, ENERG POLICY, V28, P411, DOI 10.1016/S0301-4215(00)00019-7

Mohammadpourkarbasi H, 2013, BUILDINGS, V3, P220, DOI 10.3390/buildings3010220

RIBA, PRINC LOW CARB DES R

NR 7

TC 1

Z9 1

U1 2

U2 6

PU OXFORD UNIV PRESS

PI OXFORD

PA GREAT CLARENDON ST, OXFORD OX2 6DP, ENGLAND

SN 1748-1317

EI 1748-1325

J9 INT J LOW-CARBON TEC

JI Int. J. Low-Carbon Technol.

PD JUN

PY 2015

VL 10

IS 2

SI SI

BP 119

EP 130

DI 10.1093/ijlct/ctv011

PG 12

WC Thermodynamics; Energy & Fuels

SC Thermodynamics; Energy & Fuels

GA CP4NU

UT WOS:000359859800004

OA gold

DA 2018-05-03

ER

PT J

AU Villoria-Siegert, R

Brodrick, P

Hallinan, K

Brecha, RJ

AF Villoria-Siegert, R.

Brodrick, P.

Hallinan, K.

Brecha, R. J.

TI Cost-availability curves for hierarchical implementation of residential energy-efficiency measures

SO ENERGY EFFICIENCY

LA English

DT Article

DE Community; Levelized cost; Energy efficiency; Residential; HVAC; Utility programs

AB Historical residential electricity data and natural gas consumption data were collected for, respectively, 1,200 and 178 residences in a small town in the USA. These data were merged with local building and weather databases, and energy consumption models were developed for each residence, revealing substantial variation in heating and cooling intensity. After estimating approximate physical building characteristics, energy profiles for each residence were calculated, and savings from adoption of the most cost-effective energy-efficiency measures for each residence were estimated. Effectively, we wish to leverage commonly available data sets to infer characteristics of building envelopes and equipment, without the need for detailed on-site audits. This study evaluates the potential energy savings for the residences studied and, by extrapolation, for the entire town, as a function of cost if the savings measures were to be implemented in rank-order of cost effectiveness to show that savings penetration for the community comes with nonlinearly increasing cost. The results show that nearly a 32 % collective savings in HVAC energy use could be achieved with a collective levelized cost for energy-saving measures of \$10/mmbtu saved if the most cost-effective measures among the entire community are implemented first.

C1 [Villoria-Siegert, R.; Brodrick, P.; Hallinan, K.; Brecha, R. J.] Univ Dayton, Renewable & Clean Energy Program, Dayton, OH 45469 USA.

[Hallinan, K.] Univ Dayton, Mech & Aerosp Engr, Dayton, OH 45469 USA.

[Brecha, R. J.] Univ Dayton, Dept Phys, Dayton, OH 45469 USA.

RP Brecha, RJ (reprint author), Univ Dayton, Renewable & Clean Energy Program, 300 Coll Pk Dr, Dayton, OH 45469 USA.

EM rbrecha1@udayton.edu

OI Brodrick, Philip/0000-0001-9497-7661

CR Allcott H, 2012, J ECON PERSPECT, V26, P3, DOI 10.1257/jep.26.1.3

Arimura TH, 2012, ENERG J, V33, P63, DOI 10.5547/01956574.33.2.4

Brecha RJ, 2011, ENERG POLICY, V39, P2982, DOI 10.1016/j.enpol.2011.03.011

BROWN MA, 2010, ENERGY EFFICIENCY S

Dietz T, 2009, P NATL ACAD SCI USA, V106, P18452, DOI 10.1073/pnas.0908738106

DoE-EERE, 2010, BUILD AM KICK PRES

DoE-EERE, 2013, BILL REP PROGR

EIA, 2013, ANN EN OUTL 2013

EIA, 2009, RES EN CONS SURV REC

Gillingham K, 2006, ANNU REV ENV RESOUR, V31, P161, DOI 10.1146/annurev.energy.31.020105.100157

Granade H. C., 2009, UNLOCKING ENERGY EFF

Hallinan KP, 2011, ASHRAE TRAN, V117, P577

Koomey JG, 2001, ENERG POLICY, V29, P1209, DOI 10.1016/S0301-4215(01)00068-4

NOAA, 2013, DATABASE

NREL, 2010, DATABASE

NREL, 2005, DAT NAT SOL RAD DAT

NR 16

TC 1

Z9 1

U1 0

U2 2

PU SPRINGER

PI DORDRECHT

PA VAN GODEWIJCKSTRAAT 30, 3311 GZ DORDRECHT, NETHERLANDS

SN 1570-646X

EI 1570-6478

J9 ENERG EFFIC

J1 Energy Effic.

PD APR

PY 2015

VL 8

IS 2

BP 267

EP 279

DI 10.1007/s12053-014-9291-5

PG 13

WC GREEN & SUSTAINABLE SCIENCE & TECHNOLOGY; Energy & Fuels; Environmental Studies

SC Science & Technology - Other Topics; Energy & Fuels; Environmental Sciences & Ecology

GA CD7XT

UT WOS:000351309600006

DA 2018-05-03

ER

PT J

AU Bouhou, NE

Blackhurst, MF

Torres, P

AF Bouhou, Nour-El Imane

Blackhurst, Michael F.

Torres, Pamela

TI An empirical analysis of joint residential electricity efficiency gains within and across end uses: implications for demand-side management

SO ECOLOGICAL ECONOMICS

LA English

DT Article

DE Energy efficiency; Rebound effect; Consumer behavior

ID ENERGY; PROGRAMS; SAVINGS

AB To better understand the observed performance of demand-side approaches on residential electricity use, we develop and apply a mixed regression model of electricity consumption that includes marginal, joint technical change for multiple residential electricity end-uses (air conditioning, appliances, devices, and electric vehicles). Results indicate that the relative technical state of a home can significantly influence the performance of demand-side interventions, particularly the presence of a programmable thermostat. Within air conditioning, we generally find that "enough" consistent technical improvement is needed to realize energy savings, which could be due to engineering building performance or a declining marginal rebound effect as householders become thermally comfortable. Results indicate that homeowners do not leverage efficiency gains for appliance services but demonstrate mixed results when considering the expansion of electricity services. Householders may rebound into device loads, albeit such results are not statistically significant. However, results indicate that householders do not leverage efficiency gains for electric vehicles. These results demonstrate that the net effect of technological change in households is relative to a home's baseline technical efficiency and the degree to which homeowners seek new and existing energy services, challenging empirical assessments that do not control for the technical state of multiple end uses. (C) 2015 Elsevier B.V. All rights reserved.

C1 [Bouhou, Nour-El Imane; Blackhurst, Michael F.; Torres, Pamela] Univ Texas Austin, Dept Civil Architectural & Environm Engn, Austin, TX 78712 USA.

RP Blackhurst, MF (reprint author), Univ Texas Austin, Dept Civil Architectural & Environm Engn, 301 E Dean Keaton St, Stop C1700, Austin, TX 78712 USA.

EM nbouhou@utexas.edu; mike.blackhurst@austin.utexas.edu; pjt19@utexas.edu

CR Attari SZ, 2010, P NATL ACAD SCI USA, V107, P16054, DOI 10.1073/pnas.1001509107

Azevedo I.L., 2013, REBOUND EFF IN PRESS

Azevedo I.L., 2009, THESIS CARNEGIE MELLON

Bateman IJ, 2011, ENVIRON RESOUR ECON, V48, P177, DOI 10.1007/s10640-010-9418-x

Berkhout PHG, 2000, ENERG POLICY, V28, P425, DOI 10.1016/S0301-4215(00)00022-7

Binswanger M, 2001, ECOL ECON, V36, P119, DOI 10.1016/S0921-8009(00)00214-7

Blackhurst M, 2011, ENERG POLICY, V39, P5269, DOI 10.1016/j.enpol.2011.05.037

[Anonymous], 1964, J R STAT SOC B, V26, P211

Creyts Jon, 2007, REDUCING US GREENHOU  
Cummings R. G., 1999, AM ECON REV, V89, P249  
Dennis K., 2006, ELECT J, V19, P58, DOI DOI 10.1016/J.TEJ.2006.07.006  
DOE (U.S. Department of Energy), 2013, HOM EN STAR  
DSIRE (Database of State Incentives for Renewables and Efficiency), 2013, FIN INC EN EFF  
EIA (Energy Information Administration), 2013, ANN EL POW IND REP F  
[Anonymous], 2014, ANN EN OUTL 2014 EAR  
Environmental Protection Agency, 2008, NAT ACT PLAN EN EFF  
Freire-Gonzalez J, 2011, ECOL MODEL, V223, P32, DOI 10.1016/j.ecolmodel.2011.09.001  
FTC (Federal Trade Commission), 2014, ENERGYGUIDE LAB  
Ghosh NK, 2014, ECOL ECON, V105, P55, DOI 10.1016/j.ecolecon.2014.05.002  
Greene DL, 2012, ENER POLICY, V41, P14, DOI 10.1016/j.enpol.2010.03.083  
Hanley Nick, 1990, VALUATION ENV EFFECT  
HARTMAN RS, 1988, REV ECON STAT, V70, P448, DOI 10.2307/1926783  
HAUSMAN JA, 1979, BELL J ECON, V10, P33, DOI 10.2307/3003318  
Lovins A., 1988, ENERGY J, V9, P155  
Madlener R., 2009, ENERGY, V34, P370  
Michelsen CC, 2012, ENER ECON, V34, P1271, DOI 10.1016/j.eneco.2012.06.009  
Nair G, 2010, ENER POLICY, V38, P2956, DOI 10.1016/j.enpol.2010.01.033  
NRC (National Research Council), 2009, REAL PROSP EN EFF US  
NWS (National Weather Service), 2013, MON DAT DEGR DAYS ST  
Revelt Train, 2006, REV ECON STAT, V80, P647  
SANSTAD AH, 1995, ENER POLICY, V23, P739, DOI 10.1016/0301-4215(95)00065-Q  
Saunders H, 2013, ENER POLICY, V57, P308, DOI 10.1016/j.enpol.2013.01.056  
SCHWARZ PM, 1995, ENERGY J, V16, P41  
Sorrell S, 2007, ECOLOGICAL EC, V65, P636, DOI DOI 10.1016/J.ECOLECON.2007.08.013  
NR 34  
TC 1  
Z9 1  
U1 1  
U2 16  
PU ELSEVIER SCIENCE BV  
PI AMSTERDAM  
PA PO BOX 211, 1000 AE AMSTERDAM, NETHERLANDS  
SN 0921-8009  
EI 1873-6106  
J9 ECOL ECON  
JI Ecol. Econ.  
PD FEB  
PY 2015  
VL 110  
BP 61  
EP 70  
DI 10.1016/j.ecolecon.2014.12.011  
PG 10  
WC Ecology; Economics; Environmental Sciences; Environmental Studies  
SC Environmental Sciences & Ecology; Business & Economics  
GA CC7CB  
UT WOS:000350524200006  
DA 2018-05-03  
ER  
  
PT S  
AU Bastos, BQ  
    Souza, RC  
    Oliveira, FLC  
AF Bastos, Bruno Q.  
    Souza, Reinaldo C.

Cyrino Oliveira, Fernando L.  
 BE Gomes, LFAM  
 Colcher, R  
 Wolcott, P  
 HerreraViedma, E  
 Shi, Y

TI Bottom-up long-term forecasting of Brazilian commercial class  
 electricity consumption: First results  
 SO 3RD INTERNATIONAL CONFERENCE ON INFORMATION TECHNOLOGY AND QUANTITATIVE  
 MANAGEMENT, ITQM 2015  
 SE Procedia Computer Science  
 LA English  
 DT Proceedings Paper  
 CT 3rd International Conference on Information Technology and Quantitative  
 Management (ITQM)  
 CY JUL 21-24, 2015  
 CL Rio De Janeiro, BRAZIL  
 SP Int Acad Informat Technol & Quantitat Management, Ibmec, FIRJAN, UFF, SOBRAPO, ASSESPRO,  
 CAPES, FAPERJ, SUCESU RJ, SINDITEC, ANE Natl Acad Engr, Res Ctr Fictitious Econ, Data Sci, Key Lab  
 Big Data Mining & Knowledge Management, Chinese Acad Sci, Sch Management, Univ Chinese Acad Sci,  
 Sch Management, Chinese Acad Sci, Inst Policy & Management, Chinese Soc Management Modernizat,  
 Univ Nebraska

DE Bottom-up model; electricity demand; commercial; Brazil  
 ID DEMAND

AB In Brazil, the electricity consumption of the commercial class has been growing more than the  
 consumption of the other classes, e.g. residential, industrial, and others. Understanding why this is  
 happening and how it would progress is essential for policy makers and for agents of the electrical sector.  
 Bottom-up models consider a detailed and disaggregated representation of a region's economy, and allow  
 the incorporation of technological changes and policy impacts in its forecasts. In this context, the paper  
 presents the first results of the long-term bottom-up modelling of Brazilian commercial class electricity  
 consumption. The bottom-up model used in this work is the FORECAST model adapted for Brazil. It  
 differentiates the five regions of the country, 8 subsectors of the tertiary sector, and 14 building and end  
 user related energy services, such as lighting in buildings, street lighting, ventilation and air conditioning,  
 and others. Despite the lack of consolidated information at the required level of disaggregation in Brazil,  
 the first results show proximity to the official long-term forecasts. The results are analyzed and discussed.  
 (C) 2015 Published by Elsevier B.V.

C1 [Bastos, Bruno Q.; Souza, Reinaldo C.] Pontif Catholic Univ Rio de Janeiro PUC Rio, Elect Engr Dept, BR-  
 22453900 Rio De Janeiro, RJ, Brazil.  
 [Cyrino Oliveira, Fernando L.] Pontif Catholic Univ Rio de Janeiro PUC Rio, Ind Engr Dept, BR-22453900  
 Rio De Janeiro, RJ, Brazil.

RP Bastos, BQ (reprint author), Pontif Catholic Univ Rio de Janeiro PUC Rio, Elect Engr Dept, Rua Marques  
 de Sao Vicente 255, BR-22453900 Rio De Janeiro, RJ, Brazil.

EM brunoq.b@ele.puc-rio.br  
 RI Cyrino Oliveira, Fernando Luiz/B-4187-2015  
 OI Cyrino Oliveira, Fernando Luiz/0000-0003-1870-9440  
 CR Atakhanova Z, 2007, ENERG POLICY, V35, P3729, DOI 10.1016/j.enpol.2007.01.005  
 Bianco V, 2009, ENERGY, V34, P1413, DOI 10.1016/j.energy.2009.06.034  
 BODGER PS, 1986, TECHNOL FORECAST SOC, V30, P167, DOI 10.1016/0040-1625(86)90018-1  
 Empresa de Pesquisa Energetica (EPE), 2013, PROJ DEM EN EL PROX  
 Fleiter T., 2010, 6 INT C EN EFF COMM  
 Fleiter T, 2011, RENEW SUST ENERG REV, V15, P3099, DOI 10.1016/j.rser.2011.03.025  
 Jakob M., 2013, ECEEE 2013 SUMM STUD  
 Jakob M., 2012, 7 INT C EN EFF COMM  
 Kermanshahi B, 2002, INT J ELEC POWER, V24, P789, DOI 10.1016/S0142-0615(01)00086-2

NR 9  
 TC 1  
 Z9 1  
 U1 0

U2 5  
 PU ELSEVIER SCIENCE BV  
 PI AMSTERDAM  
 PA SARA BURGERHARTSTRAAT 25, PO BOX 211, 1000 AE AMSTERDAM, NETHERLANDS  
 SN 1877-0509  
 J9 PROCEDIA COMPUT SCI  
 PY 2015  
 VL 55  
 BP 388  
 EP 394  
 DI 10.1016/j.procs.2015.07.088  
 PG 7  
 WC Computer Science, Information Systems; Computer Science, Theory &  
 Methods  
 SC Computer Science  
 GA BD3RJ  
 UT WOS:000360101400043  
 OA gold  
 DA 2018-05-03  
 ER

PT S  
 AU Elotefy, H  
 Abdelmagid, KSS  
 Morghany, E  
 Ahmed, TMF  
 AF Elotefy, Hazem  
 Abdelmagid, Khaled S. S.  
 Morghany, Ezzat  
 Ahmed, Tarek M. F.  
 BE Salame, C  
 Aillerie, M  
 Papageorgas, P  
 TI Energy-efficient Tall buildings design strategies: A holistic approach  
 SO INTERNATIONAL CONFERENCE ON TECHNOLOGIES AND MATERIALS FOR RENEWABLE  
 ENERGY, ENVIRONMENT AND SUSTAINABILITY -TMREES15  
 SE Energy Procedia  
 LA English  
 DT Proceedings Paper  
 CT International Conference on Technologies and Materials for Renewable  
 Energy, Environment and Sustainability (TMREES)  
 CY APR 17-20, 2015  
 CL Beirut, LEBANON  
 SP Euro Mediterranean Inst Sustainable Dev  
 DE Energy efficiency; design strategies; tall buildings; visualisation  
 AB The number of tall buildings is increasing as a result of the advances in construction technologies and the rising land prices. These buildings are characterised by their high energy consumption compared to other building types as they rely intensively on mechanical HVAC systems due to the extreme weather conditions associated with the increase in height. However, they present a great opportunity for energy savings. In recent years, it has been noticed the increasing interest in geometry and form of tall buildings, as a result of the evolution of parametric modelling and 3D visualisation tools, on the expense of the environmental aspect. This paper discusses factors affecting the energy consumption in the tall buildings. Through an extensive analysis of Literature, active and passive energy efficient strategies adopted in tall building at various building stages are identified. In addition, the role of architectural design parameters, such as building form, orientation and envelope on the tall building energy performance are highlighted. Finally, a set of guidelines and environmental design strategies to be considered in different phases in order to achieve energy-efficient tall buildings are proposed. These strategies have been categorised into four stages namely early design, conceptualisation, and documentation and operational. A 3D modelling

approach was used to visualise and illustrate the proposed strategies in different stages. (C) 2015 The Authors. Published by Elsevier Ltd.

C1 [Elotefy, Hazem; Abdelmagid, Khaled S. S.; Morghany, Ezzat] Assiut Univ, Dept Architectural Engrn, Assiut 71515, Egypt.

[Abdelmagid, Khaled S. S.] King Saud Univ, Dept Architecture & Bldg Sci, Riyadh 57448, Saudi Arabia.

[Ahmed, Tarek M. F.] Deakin Univ, Sch Architecture & Built Environm, Geelong, Vic 3220, Australia.

RP Ahmed, TMF (reprint author), Deakin Univ, Sch Architecture & Built Environm, Geelong, Vic 3220, Australia.

EM tarek.ahmed@deakin.edu.au

OI Ahmed, Tarek/0000-0001-8576-2693

CR Clair P, 2010, CLIMATE TALL BUILDIN

Ellis PG, 2005, C P 9 INT BUILD PERF, P1

Elotefy H. A., 2015, THESIS ASSIUT U ASSI

Haase M., 2006, C P 23 INT C PASS LO

Kleiven T, 2003, THESIS NORWEIGIAN U, P225

Ling C., 2007, J CONSTR DEV COUNTRI, V12, P27

Lowry W., 1991, ATMOSPHERIC ECOLOGY, P135

Oke T.R., 1974, REV URBAN CLIMATOLOG, P18

Reffat R. M., 2011, C P EN SOL SUST WORL, P1413

Rovers R., 2008, 23 UIA WORLD C ARCH

Yeang K., 2008, C P CTBUH 8 WORLD C

NR 11

TC 1

Z9 1

U1 1

U2 9

PU ELSEVIER SCIENCE BV

PI AMSTERDAM

PA SARA BURGERHARTSTRAAT 25, PO BOX 211, 1000 AE AMSTERDAM, NETHERLANDS

SN 1876-6102

J9 ENRGY PROCED

PY 2015

VL 74

BP 1358

EP 1369

DI 10.1016/j.egypro.2015.07.782

PG 12

WC Energy & Fuels; Environmental Sciences; Materials Science,  
Multidisciplinary

SC Energy & Fuels; Environmental Sciences & Ecology; Materials Science

GA BD4EY

UT WOS:000360574400147

OA gold

DA 2018-05-03

ER

PT S

AU Kmet'kova, J

Krajcik, M

AF Kmet'kova, Jana

Krajcik, Michal

BE Perino, M

TI Energy efficient retrofit and life cycle assessment of an apartment  
building

SO 6TH INTERNATIONAL BUILDING PHYSICS CONFERENCE (IBPC 2015)

SE Energy Procedia

LA English

DT Proceedings Paper

CT 6th International Building Physics Conference (IBPC)  
CY JUN 14-17, 2015  
CL Torino, ITALY  
SP ATI Piemonte, PolitecnicoTorino, Dept Energy  
DE Energy performance; Life cycle assessment; Life-cycle costs;  
Sustainability; Residential building  
AB While new buildings should be designed as intelligent low or zero-energy buildings, refurbishment of the existing building stock may present even a greater challenge, when in particular financing of the necessary investments to energy saving measures poses the biggest barrier. As the residential sector in the EU is responsible for about 40% of the total energy consumption and up to 40 % of the total carbon dioxide emissions, the residential building stock offers high potential for energy savings. By applying the life cycle assessment, it is possible to optimise the social, economic and environmental aspects, starting from the extraction of raw materials, up to the final disposal of waste materials. A case study of a selected representative residential building located in Slovakia is presented, for which the cost-optimal levels of energy performance are determined in terms of life-cycle costs of the building. Three variants of renovation were defined, each variant having different level of thermal insulation of building constructions. The method of Life-Cycle Costs was used to evaluate the economic feasibility of the suggested renovation scenarios for the apartment house. (C) 2015 Published by Elsevier Ltd.  
C1 [Kmet'kova, Jana; Krajcik, Michal] Slovak Univ Technol Bratislava, Dept Bldg Serv, Radlinskeho 11, Bratislava 81368, Slovakia.  
RP Kmet'kova, J (reprint author), Slovak Univ Technol Bratislava, Dept Bldg Serv, Radlinskeho 11, Bratislava 81368, Slovakia.  
EM jana.kmetkova@stuba.sk  
RI Krajcik, Michal/K-4745-2016  
OI Krajcik, Michal/0000-0002-1074-0948  
CR Becchio C., 2013, CLIMA 2013  
Kmetkova J., 2013, THESIS SVF STU BRATI  
Petrakova Z., 2003, VYUZITIE PROJEKTOVEH  
[Anonymous], 2012, 73054022012 STN  
[Anonymous], 2014, STRATEGY RENOVATION  
NR 5  
TC 1  
Z9 1  
U1 1  
U2 9  
PU ELSEVIER SCIENCE BV  
PI AMSTERDAM  
PA SARA BURGERHARTSTRAAT 25, PO BOX 211, 1000 AE AMSTERDAM, NETHERLANDS  
SN 1876-6102  
J9 ENRGY PROCED  
PY 2015  
VL 78  
BP 3186  
EP 3191  
DI 10.1016/j.egypro.2015.11.778  
PG 6  
WC Construction & Building Technology; Energy & Fuels; Physics, Applied  
SC Construction & Building Technology; Energy & Fuels; Physics  
GA BE3LF  
UT WOS:000370934403043  
OA gold  
DA 2018-05-03  
ER  
  
PT S  
AU Lassandro, P  
Cosola, T  
Tundo, A



AF Lassandro, Paola

Cosola, Teresa

Tundo, Antonella

BE Perino, M

TI School building heritage: energy efficiency, thermal and lighting  
comfort evaluation via virtual tour

SO 6TH INTERNATIONAL BUILDING PHYSICS CONFERENCE (IBPC 2015)

SE Energy Procedia

LA English

DT Proceedings Paper

CT 6th International Building Physics Conference (IBPC)

CY JUN 14-17, 2015

CL Torino, ITALY

SP ATI Piemonte, PolitecnicoTorino, Dept Energy

DE Energy efficiency; sustainability; lighting comfort; thermal comfort;  
school building; virtual tour; education

AB Since the Italian school buildings cause huge energy waste, it is increasingly compelling to identify, quantify and eliminate energy deficits through integrated audits and coordinated actions of energy saving and retrofit. We developed a methodology that is based on a holistic approach that correlates students' post occupancy evaluation with instrumental survey and software simulations and, at the same time, we examined an innovative use of virtual tour to make the energy audit results friendly available to school managers and community. This methodology, validated on a school building of the 20s-30s, identified energy saving and retrofitting actions according to cost levels. (C) 2015 The Authors. Published by Elsevier Ltd. This is an open access article under the CC BY-NC-ND license (<http://creativecommons.org/licenses/by-nc-nd/4.0/>).

C1 [Lassandro, Paola] UOS Bari, Italian Natl Res Council, Construct Technol Inst, ITC CNR, Via Paolo Lembo 38-b, I-70124 Bari, Italy.

[Cosola, Teresa] Univ Florence, ABITA Bioecol Architecture & Technol Innovat Envi, I-50121 Florence, Italy.

[Tundo, Antonella] ENEA, UTEE AVEE Italian Natl Agcy New Technol Energy &, Tech Unit Energy Efficiency, I-70126 Bari, Italy.

RP Lassandro, P (reprint author), UOS Bari, Italian Natl Res Council, Construct Technol Inst, ITC CNR, Via Paolo Lembo 38-b, I-70124 Bari, Italy.

EM [paola.lassandro@itc.cnr.it](mailto:paola.lassandro@itc.cnr.it)

OI LASSANDRO, PAOLA/0000-0001-6611-2820

CR Amasuomo JOM, 2013, J ED LEARNING, V2, P201

Calice C, 2012, PONTE, V4, P27

Carlucci S, 2015, RENEW SUST ENERG REV, V47, P1016, DOI 10.1016/j.rser.2015.03.062

Chaves F, 2014, P 40 IAHS WORLD C HO, P120

Lassandro P, 2014, P 40 IAHS WORLD C HO, P1

Nabil A, 2006, J ENERGY BUILDINGS, V38, P905

Reinhart C, 2014, J ILLUMINATING ENG S, V4, P193

NR 7

TC 1

Z9 1

U1 0

U2 4

PU ELSEVIER SCIENCE BV

PI AMSTERDAM

PA SARA BURGERHARTSTRAAT 25, PO BOX 211, 1000 AE AMSTERDAM, NETHERLANDS

SN 1876-6102

J9 ENRGY PROCED

PY 2015

VL 78

BP 3168

EP 3173

DI 10.1016/j.egypro.2015.11.775

PG 6

WC Construction & Building Technology; Energy & Fuels; Physics, Applied  
 SC Construction & Building Technology; Energy & Fuels; Physics  
 GA BE3LF  
 UT WOS:000370934403040  
 OA gold  
 DA 2018-05-03  
 ER

PT B

AU Lima, WS

Souto, E

Rocha, T

Pazzi, RW

Pramudianto, F

AF Lima, Wesllen S.

Souto, Eduardo

Rocha, Thiago

Pazzi, Richard W.

Pramudianto, Ferry

GP IEEE

TI User Activity Recognition for Energy Saving in Smart Home Environment

SO 2015 IEEE SYMPOSIUM ON COMPUTERS AND COMMUNICATION (ISCC)

LA English

DT Proceedings Paper

CT IEEE Symposium on Computers and Communication (ISCC)

CY JUL 06-09, 2015

CL Larnaca, CYPRUS

DE Activity Recognition; Energy Consumption; Internet of Things; Smart Environment

AB In recent years, the consumption of electricity has increased considerably in the industrial, commercial and residential sectors. This has prompted a branch of research which attempts to overcome this problem by applying different information and communication technologies, turning houses and buildings into smart environments. In this paper, we propose and design an energy saving technique based on the relationship between the user's activities and electrical appliances in smart home environments. The proposed method utilizes machine learning techniques to automatically recognize the user's activities, and then a ranking algorithm is applied to relate activities and existing home appliances. Finally, the system gives recommendations to the user whenever it detects a waste of energy. Tests on a real database show that the proposed method can to save up to 35% of electricity in a smart home.

C1 [Lima, Wesllen S.; Souto, Eduardo; Rocha, Thiago] Univ Fed Amazonas, Inst Comp, Manaus, Amazonas, Brazil.

[Pazzi, Richard W.] UOIT, Oshawa, ON, Canada.

[Pramudianto, Ferry] Fraunhofer FIT, Schloss Birlinghoven, Germany.

RP Lima, WS (reprint author), Univ Fed Amazonas, Inst Comp, Manaus, Amazonas, Brazil.

EM wesllen@icomp.ufam.edu.br; esouto@icomp.ufam.edu.br;

thiago.rocha@icomp.ufam.edu.br; richard.pazzi@uoit.ca;

ferry.ferry@fit.fraunhofer.de

CR AGNETIS A, 2011, DEC CONTR EUR CONTR, P5899

Cheng Z., 2012, 4 INT C AW SCI TECHN, P109

DANIELSSON PE, 1980, COMPUT VISION GRAPH, V14, P227, DOI 10.1016/0146-664X(80)90054-4

Delaney Declan T, 2009, P 1 ACM WORKSH EMB S, P61

EPE, 2013, PROJ DEM EN EL

Erol-Kantarci M., 2010, COMM QBSC 2010 25 BI, P63

Frakes W. B., 1992, INFORM RETRIEVAL DAT

Guillemin P., 2009, TECH REP

Harrison Colin, 2011, P 55 ANN M ISSS 2011, V55

Khan I., 2013, ARXIV13061137

- Lai CF, 2012, 2012 IEEE INTERNATIONAL CONFERENCE ON GREEN COMPUTING AND COMMUNICATIONS, CONFERENCE ON INTERNET OF THINGS, AND CONFERENCE ON CYBER, PHYSICAL AND SOCIAL COMPUTING (GREENCOM 2012), P66, DOI 10.1109/GreenCom.2012.20
- Lee S. W., 2010, AGR TRANSITION ASIA, P37
- Niyato D., 2011, COMMUN MAG IEEE, P53
- OLIVEIRA E., 2007, REV BRASILEIRA BIBLI, V3, P73
- Osmani V, 2008, J NETW COMPUT APPL, V31, P628, DOI 10.1016/j.jnca.2007.11.002
- Perera C., 2013, IEEE COMMUN SURV TUT, V16, P1, DOI DOI 10.1109/SURV.2013.042313.00197
- Ramos C, 2008, IEEE INTELL SYST, V23, P15, DOI 10.1109/MIS.2008.19
- Sanchez D, 2008, IEEE INTELL SYST, V23, P50, DOI 10.1109/MIS.2008.18
- Singla G, 2010, J AMB INTEL HUM COMP, V1, P57, DOI 10.1007/s12652-009-0007-1
- Tapia EM, 2004, LECT NOTES COMPUT SC, V3001, P158
- Tapia E. M., 2004, P UB 2004 UB COMP
- Tompros S, 2009, IEEE NETWORK, V23, P8, DOI 10.1109/MNET.2009.5350347
- Weng MY, 2012, IEEE INT C INT ROBOT, P5233, DOI 10.1109/IROS.2012.6385762
- Yick J, 2008, COMPUT NETW, V52, P2292, DOI 10.1016/j.comnet.2008.04.002
- Zhao Z, 2013, IEEE T SMART GRID, V4, P1391, DOI 10.1109/TSG.2013.2251018

NR 25

TC 1

Z9 1

U1 0

U2 0

PU IEEE

PI NEW YORK

PA 345 E 47TH ST, NEW YORK, NY 10017 USA

BN 978-1-4673-7194-0

PY 2015

BP 751

EP 757

PG 7

WC Computer Science, Theory & Methods; Engineering, Electrical & Electronic; Telecommunications

SC Computer Science; Engineering; Telecommunications

GA BF2MW

UT WOS:000380481500120

DA 2018-05-03

ER

PT J

AU Lombardo, G

Cicero, C

AF Lombardo, Grazia

Cicero, Chiara

TI Rehabilitation strategies for energy-efficient buildings in GeoCluster

SO ADVANCES IN BUILDING ENERGY RESEARCH

LA English

DT Review

DE GeoCluster; refurbishment; modern buildings; Mediterranean climate; innovative envelope

AB The concept of GeoCluster is a virtual homogeneous trans-regional area where strong similarities are found in terms of climate, environmental context, culture, construction typologies. It allows to export relevant results and guidelines, studied in a specific area, in others trans-regional areas with strong similarities. Present research regards the modern building heritage constituting framed buildings that represent, at the international level, a large part of the existing heritage and is characterized by poor performance in environmental and energetic aspects. In particular, this paper identifies guidelines to approach the optimization of the intervention for the energetic restoration of a building's heritage belonging to the GeoCluster that we call "Mediterranean".

C1 [Lombardo, Grazia; Cicero, Chiara] Univ Catania, Dept Civil Engn & Architecture, Catania, Italy.

RP Lombardo, G (reprint author), Univ Catania, Dept Civil Engn & Architecture, Catania, Italy.  
EM glombardo@dau.unict.it

CR Campioli A., 2007, COMPORTAMENTO ENERGE

Cicero C., 2011, J CIVIL ENG ARCHITEC, V5, P986

Cicero C., 2009, THESIS

Cicero C., 2012, 38 IAHS WORLD C HOUS

Cicero C., 2013, 39 C SOC HOUS SEPT 1

Energy Efficient buildings PPP, 2010, MULT ANN ROADM LONG

Koukkari H., 2011, INT J SUSTAINABLE BU, V2, P87

Lombardo G., 2011, PROGETTO SOSTENIBILE, V30, P94

Lombardo G., 2014, INT J SUSTAINABLE BU, V5, P53

Lombardo G., 2011, INT J HOUSING SCI IT, V35, P103

Lombardo G, 2012, FRONT ARCHIT RES, V1, P357, DOI 10.1016/j.foar.2012.10.001

Mareddu L., 2000, NATURALITA DIMENSION

Norberg Schulz C., 1986, GENIUS LOCI

Pizzi E., 2013, 39 C SOC HOUS SEPT 1

[Anonymous], NON TRADITIONAL REF

NR 15

TC 1

Z9 1

U1 0

U2 0

PU TAYLOR & FRANCIS LTD

PI ABINGDON

PA 2-4 PARK SQUARE, MILTON PARK, ABINGDON OR14 4RN, OXON, ENGLAND

SN 1751-2549

EI 1756-2201

J9 ADV BUILD ENERGY RES

JI Adv. Build. Energy Res.

PY 2015

VL 9

IS 1

BP 34

EP 54

DI 10.1080/17512549.2014.923326

PG 21

WC Construction & Building Technology

SC Construction & Building Technology

GA V8Z2K

UT WOS:000422101700003

DA 2018-05-03

ER

PT S

AU Lu, CH

AF Lu, Ching-Hu

BE Staddon, J

Gwilt, I

Smith, CH

TI IoT-enhanced and Bidirectionally Interactive Information Visualization  
for Context-aware Home Energy Savings

SO Proceedings of the 2015 IEEE International Symposium on Mixed and  
Augmented Reality Media, Art, Social Science, Humanities and Design

SE International Symposium on Mixed and Augmented Reality

LA English

DT Proceedings Paper

CT IEEE International Symposium on Mixed and Augmented Reality Media, Art,  
Social Science, Humanities and Design

CY SEP 29-OCT 03, 2015

CL Fukuoka, JAPAN

SP Conf Publishing Serv, IEEE Comp Soc, IEEE Comp Soc Tech & Conf Activities Board

DE GAME-BASED ECO-FEEDBACK; IOT; PHYSICAL-CYBER SYSTEM; CONTEXT-AWARENESS;

MIXED REALITY; H.5.2 [USER INTERFACES]: USER-CENTERED DESIGN; I.2.11

[DISTRIBUTED ARTIFICIAL INTELLIGENCE]: MULTIAGENT SYSTEMS

AB In recent years, due to deteriorating global warming, there has been increasing attention to home energy savings, which is often a serious and not so interesting task. In this regard, we proposed a playful and bidirectionally interactive eco-feedback with three kinds of information visualization integrated with a 3D pet-raising game, which synchronously visualizes the information of the physical environment with the virtual environment by leveraging IoT (Internet of Things) enabled technologies in hopes of enhancing user experience and prolonging users' engagement in energy savings. In addition to mere mapping from physical to virtual environment for traditional game-based energy savings, this study also makes use of the other direction to form a bidirectional mapping to empower users to allow direct and flexible remote control anywhere and anytime in a more natural and playful way. Furthermore, integrating context-awareness with the bidirectional mapping in an energy-saving system also enhances the immersive experience of the users.

C1 [Lu, Ching-Hu] Natl Taiwan Univ Sci & Technol, Dept Elect Engn, Taipei, Taiwan.

RP Lu, CH (reprint author), Natl Taiwan Univ Sci & Technol, Dept Elect Engn, Taipei, Taiwan.

EM jhluh@ieee.org

CR Consolvo S, 2009, P 27 INT C HUM FACT

Fogg B, 2002, UBIQUITY, V2002, P2, DOI 10.1145/764008.763957, DOI 10.1145/764008.763957]

Gandy M., 2014, P 27 ANN ACM S US IN, P627

Hsieh YZ, 2015, IEEE ICCE, P332, DOI 10.1109/ICCE-TW.2015.7216928

Lu C.-H., 2013, IEEE T AUTOM SCI ENG, V11, P715

Lu C.-H., 2013, 11 INT C SMART HOM H, P151

Lu CH, 2015, IEEE ICCE, P330, DOI 10.1109/ICCE-TW.2015.7216927

Orland B, 2014, ENERGBUILDINGS, V74, P43, DOI 10.1016/j.enbuild.2014.01.036

Rodgers J, 2011, IEEE T VIS COMPUT GR, V17, P2489, DOI 10.1109/TVCG.2011.196

Yeh H.-W., 2011, INT C CLOUD GREEN CO, P690

NR 10

TC 1

Z9 1

U1 0

U2 2

PU IEEE

PI NEW YORK

PA 345 E 47TH ST, NEW YORK, NY 10017 USA

SN 1554-7868

BN 978-1-4673-9628-8

J9 INT SYM MIX AUGMENT

PY 2015

BP 15

EP 20

DI 10.1109/ISMAR-MASHD.2015.20

PG 6

WC Computer Science, Artificial Intelligence; Computer Science,

Interdisciplinary Applications; Computer Science, Theory & Methods;

Imaging Science & Photographic Technology

SC Computer Science; Imaging Science & Photographic Technology

GA BF3EW

UT WOS:000380533700004

DA 2018-05-03

ER

PT B

AU Mendes, TDP

Godina, R

Rodrigues, EMG  
 Matias, JCO  
 Catalao, JPS  
 AF Mendes, T. D. P.  
 Godina, R.  
 Rodrigues, E. M. G.  
 Matias, J. C. O.  
 Catalao, J. P. S.  
 GP IEEE  
 TI Smart and Energy-Efficient Home Implementation: Wireless Communication Technologies Role  
 SO 2015 IEEE 5TH INTERNATIONAL CONFERENCE ON POWER ENGINEERING, ENERGY AND ELECTRICAL DRIVES (POWERENG)  
 LA English  
 DT Proceedings Paper  
 CT IEEE 5th International Conference on Power Engineering, Energy and Electrical Drives  
 CY MAY 11-13, 2015  
 CL riga, LATVIA  
 DE Smart Home; Cloud-Based Solutions; Smart Domestic Appliances; Wireless protocols  
 ID SENSOR NETWORKS; SYSTEMS  
 AB Smart home vision aims for the integration of key electrical appliances and services, communications and information technologies into one intelligent network to be controlled, monitored and managed by the building user. A wireless infrastructure as a smart home communication backbone is the logical choice for a so high level of integration. This paper updates on wireless communication technologies state-of-the-art for short range applications, and discusses their suitability according to major functional areas or services that may benefit from smart home implementation.  
 C1 [Mendes, T. D. P.] Univ Beira Interior, Covilha, Portugal.  
 Univ Lisbon, INESC ID, IST, Lisbon, Portugal.  
 RP Mendes, TDP (reprint author), Univ Beira Interior, Covilha, Portugal.  
 EM catalao@ubi.pt  
 RI Catalao, Joao/I-3927-2012; Godina, Radu/E-1705-2018  
 OI Catalao, Joao/0000-0002-2105-3051; Godina, Radu/0000-0003-1244-5624;  
 Matias, Joao/0000-0003-4329-6246; Rodrigues, Eduardo/0000-0002-4589-5341  
 CR Aurilio G, 2014, 2014 IEEE INTERNATIONAL INSTRUMENTATION AND MEASUREMENT TECHNOLOGY CONFERENCE (I2MTC) PROCEEDINGS, P380, DOI 10.1109/I2MTC.2014.6860772  
 Balachandran K., 2014, P 2014 16 INT C ADV  
 Dawadi PN, 2013, IEEE T SYST MAN CY-S, V43, P1302, DOI 10.1109/TSMC.2013.2252338  
 Driberg M, 2014, IEEE WIREL COMMUN LE, V3, P205, DOI 10.1109/WCL.2014.012414.130609  
 Gu H., 2011, P 2011 INT C DES SMA  
 Li TM, 2013, IEEE T WIREL COMMUN, V12, P984, DOI 10.1109/TWC.2012.011513.111495  
 Li TT, 2012, IEEE WIREL COMMUN, V19, P66, DOI 10.1109/MWC.2012.6231161  
 Liang WF, 2013, IEEE T COMPUT, V62, P1932, DOI 10.1109/TC.2012.124  
 Lugo-Cordero HM, 2014, IEEE T SMART GRID, V5, P1246, DOI 10.1109/TSG.2013.2268983  
 Macedonio D, 2014, SCI COMPUT PROGRAM, V81, P53, DOI 10.1016/j.scico.2013.01.005  
 Neirotti P, 2014, CITIES, V38, P25, DOI 10.1016/j.cities.2013.12.010  
 Siano P, 2013, J AMB INTEL HUM COMP, V4, P651, DOI 10.1007/s12652-013-0176-9  
 Tung HY, 2013, IEEE T CONSUM ELECTR, V59, P756, DOI 10.1109/TCE.2013.6689686  
 Viani F, 2013, P IEEE, V101, P2381, DOI 10.1109/JPROC.2013.2266858  
 Yoo SE, 2010, IEEE T IND ELECTRON, V57, P3868, DOI 10.1109/TIE.2010.2040630  
 NR 15  
 TC 1  
 Z9 1  
 U1 0  
 U2 2  
 PU IEEE  
 PI NEW YORK

PA 345 E 47TH ST, NEW YORK, NY 10017 USA  
 BN 978-1-4799-9978-1  
 PY 2015  
 BP 377  
 EP 382  
 PG 6  
 WC Energy & Fuels; Engineering, Electrical & Electronic  
 SC Energy & Fuels; Engineering  
 GA BF1XU  
 UT WOS:000380443900057  
 DA 2018-05-03  
 ER

PT S

AU Parfenenko, Y

Shendryk, V

Vashchenko, S

Fedotova, N

AF Parfenenko, Yuliia

Shendryk, Vira

Vashchenko, Svitlana

Fedotova, Natalya

BE Dregvaite, G

Damasevicius, R

TI The Forecasting of the Daily Heat Demand of the Public Sector Buildings  
 with District Heating

SO INFORMATION AND SOFTWARE TECHNOLOGIES, ICIST 2015

SE Communications in Computer and Information Science

LA English

DT Proceedings Paper

CT 21st International Conference on Information and Software Technologies  
 (ICIST)

CY OCT 15-16, 2015

CL Druskininkai, LITHUANIA

SP Kaunas Univ Technol

DE Forecasting; Heat energy demand; Neural network; Information system;  
 Energy management

ID CONSUMPTION

AB This study is devoted to the increasing of the heat energy demand forecasting accuracy for district heating of the public sector buildings.

The authors have analyzed forecasting techniques used for the heat energy demand forecasting for buildings with district heating. The system model for description the forecasting process as a part of the information support of the heat energy management process in the public sector institution is proposed.

The mathematical model of the heat energy demand forecasting of a public sector building have been developed. It is based on the usage of the artificial neural networks technology. It takes into account both meteorological and social components of impact on the heat energy demand. The computational experiments that prove its accuracy have been carried out. The proposed models have been implemented in the forecasting subsystem of the information and analysis system "HeatCAM".

C1 [Parfenenko, Yuliia; Shendryk, Vira; Vashchenko, Svitlana; Fedotova, Natalya] Sumy State Univ, Sumy, Ukraine.

RP Shendryk, V (reprint author), Sumy State Univ, Sumy, Ukraine.

EM yuliya\_p@opm.sumdu.edu.ua; ve-shen@opm.sumdu.edu.ua;

sveta@opm.sumdu.edu.ua

OI Parfenenko, Yuliia/0000-0003-4377-5132; Shendryk,

Vira/0000-0001-8325-3115

CR Bacher P, 2013, ENERGBUILDINGS, V65, P101, DOI 10.1016/j.enbuild.2013.04.022

Buhari M., 2012, P INT MULT ENG COMP

Chramcov B., 2010, INT J MATH MODELS ME, V4, P231

Datta D., 1997, P CLIMA 2000 C AUG 3, P1  
 Dostal P., 2002, P E W FUZZ C, P178  
 Grosswindhager S., 2011, P 31 INT S FOR, P1  
 Grzenda Maciej, 2012, Control and Cybernetics, V41, P213  
 Haykin S., 2005, NEURAL NETWORKS COMP  
 Idowu S., 2014, P IEEE INT C SMART G, P554  
 International Organization of Standardization, 2011, 500012011 ISO  
 Komass T., 2012, P 11 INT SCI C, V11, P1  
 Menzel C, 2006, HDB ARCHITECTURES IN, P215  
 Mitrea C.A., 2009, INT J ENG BUS MANAG, V1, P67  
 Moon J.W., 2009, P 11 INT IBPSA C GLA, P64  
 Nielsen H.A., 2000, PREDICTING HEAT CONS, P147  
 Parfenenko Y, 2014, COMM COM INF SC, V465, P1  
 Park TC, 2010, KOREAN J CHEM ENG, V27, P1063, DOI 10.1007/s11814-010-0220-9  
 Shendryk V., 2013, INFORM ANAL SYSTEM M  
 [Anonymous], 2005, 44722005 DSTU EN MAN  
 Voropai N.I., 2010, SYSTEM RES ENERGY SE, P685  
 Wojdyga K., 2014, INT J ENERGY POWER E, V3, P237  
 Yu H., 2011, IND ELECT HDB INTELL

NR 22

TC 1

Z9 1

U1 1

U2 3

PU SPRINGER-VERLAG BERLIN

PI BERLIN

PA HEIDELBERGER PLATZ 3, D-14197 BERLIN, GERMANY

SN 1865-0929

BN 978-3-319-24770-0; 978-3-319-24769-4

J9 COMM COM INF SC

PY 2015

VL 538

BP 187

EP 198

DI 10.1007/978-3-319-24770-0\_17

PG 12

WC Computer Science, Information Systems; Computer Science,  
 Interdisciplinary Applications; Computer Science, Software Engineering;  
 Computer Science, Theory & Methods

SC Computer Science

GA BE2GI

UT WOS:000369179100017

DA 2018-05-03

ER

PT S

AU Semprini, G

Barbieri, D

Gober, A

Zandi, F

AF Semprini, Giovanni

Barbieri, Davide

Gober, Alessandro

Zandi, Francesca

BE Perino, M

TI Effect of occupant behavior and control systems on the reduction of  
 energy needs of residential buildings

SO 6TH INTERNATIONAL BUILDING PHYSICS CONFERENCE (IBPC 2015)



SE Energy Procedia  
 LA English  
 DT Proceedings Paper  
 CT 6th International Building Physics Conference (IBPC)  
 CY JUN 14-17, 2015  
 CL Torino, ITALY  
 SP ATI Piemonte, PolitecnicoTorino, Dept Energy  
 DE building energy needs; occupant behaviour; control systems; dynamic energy simulation; thermostatic radiator valves  
 AB Adoption of energy metering systems in apartments with centralized heating plant will lead to greater awareness of the users on energy consumptions. Moreover control systems allow to manage internal temperature according to kind of occupation of the apartment.  
 Starting from the energy consumption of a case study, an apartment block in Bologna, this paper shows the results, based on dynamic simulation, of reduction of energy needs resulting from retrofitting on the building envelope and the effects of thermoregulation systems. Different setting of the internal temperature in adjacent apartments can lead to a variation of energy consumption up to 30%. (C) 2015 Published by Elsevier Ltd.  
 C1 [Semprini, Giovanni] DIN Univ Bologna, Via Risprgimento 2, I-40136 Bologna, Italy.  
 [Barbieri, Davide; Gober, Alessandro; Zandi, Francesca] Energet Consultants, Bologna, Italy.  
 RP Semprini, G (reprint author), DIN Univ Bologna, Via Risprgimento 2, I-40136 Bologna, Italy.  
 EM giovanni.semprini@unibo.it  
 CR Belimo, 2014, WAT BOOK THECN DOC  
 [Anonymous], 44221997 EN  
 Ferrante A, 2014, SUSTAIN CITIES SOC, V13, P237, DOI 10.1016/j.scs.2014.02.001  
 Gagliano A, 2014, ENRGY PROCED, V62, P62, DOI 10.1016/j.egypro.2014.12.367  
 Ma ZJ, 2012, ENERGBUILDINGS, V55, P889, DOI 10.1016/j.enbuild.2012.08.018  
 Semprini G, 2015, BSA 2015 2 IBPSA IT  
 [Anonymous], 2011, DESIGNBUILDER ENERGY  
 NR 7  
 TC 1  
 Z9 1  
 U1 0  
 U2 1  
 PU ELSEVIER SCIENCE BV  
 PI AMSTERDAM  
 PA SARA BURGERHARTSTRAAT 25, PO BOX 211, 1000 AE AMSTERDAM, NETHERLANDS  
 SN 1876-6102  
 J9 ENRGY PROCED  
 PY 2015  
 VL 78  
 BP 633  
 EP 638  
 DI 10.1016/j.egypro.2015.11.044  
 PG 6  
 WC Construction & Building Technology; Energy & Fuels; Physics, Applied  
 SC Construction & Building Technology; Energy & Fuels; Physics  
 GA BE3LF  
 UT WOS:000370934400106  
 OA gold  
 DA 2018-05-03  
 ER  
 PT S  
 AU Sun, J  
 Zhang, YP  
 AF Sun, Jie  
 Zhang, Yongping  
 GP IEEE

TI Towards an Energy Efficient Architecture in Smart Building  
 SO 2015 INTERNATIONAL CONFERENCE ON COMPUTATIONAL INTELLIGENCE AND  
 COMMUNICATION NETWORKS (CICN)

SE International Conference on Computational Intelligence and Communication  
 Networks

LA English

DT Proceedings Paper

CT 7th International Conference on Computational Intelligence and  
 Communication Networks (CICN)

CY DEC 12-14, 2015

CL Jabalpur, INDIA

SP IEEE, IEEE Comp Soc, MIR Labs, Gyan Ganga Inst Technol & Sci, IEEE MP Sub Sect

DE energy conservation; smart building; sensor network

AB Reducing energy consumption within buildings has become a focus of researchers. This paper looks  
 modern buildings as a cyber-physical energy system and provide a three-layer architecture with the focus  
 on energy saving. We introduce the key technologies from sensing, computation and controlling aspects,  
 besides with highlighting some issues for consideration.

C1 [Sun, Jie; Zhang, Yongping] Ningbo Univ Technol, Sch Elect & Informat Engn, Ningbo, Zhejiang, Peoples  
 R China.

RP Sun, J (reprint author), Ningbo Univ Technol, Sch Elect & Informat Engn, Ningbo, Zhejiang, Peoples R  
 China.

EM sunjie@nbut.edu.cn; ypz@nbut.cn

CR Agarwal Y., 2010, P 2 ACM WORKSH EMB S, P1, DOI DOI 10.1145/1878431.1878433

Chana M., 2008, J COMPUTER METHODS P, V91, P55

Erickson V. L., 2009, P 1 ACM WORKSH EMB S, P19, DOI DOI 10.1145/1810279.1810284

Grimmett G., 2005, PROBABILITY RANDOM P

Kleissl J., 2010, P 47 DES AUT C, P749, DOI DOI 10.1145/1837274.1837464

Rajkumar R. R., 2010, P 47 DES AUT C, P731

Weiss M., 2012, INT CONF PERVAS COMP, P190, DOI 10.1109/PerCom.2012.6199866

Yick J., COMPUTER NETWORKS, V52, P2292

Zoha A., 2012, SENSORS-BASEL, V12, P16838, DOI 10.3390/s121216838

NR 9

TC 1

Z9 1

U1 1

U2 2

PU IEEE

PI NEW YORK

PA 345 E 47TH ST, NEW YORK, NY 10017 USA

SN 2375-8244

BN 978-1-5090-0076-0

J9 INT CONF COMPUT INTE

PY 2015

BP 1589

EP 1592

DI 10.1109/CICN.2015.302

PG 4

WC Computer Science, Artificial Intelligence; Engineering, Electrical &  
 Electronic; Telecommunications

SC Computer Science; Engineering; Telecommunications

GA BG1XE

UT WOS:000387128200325

DA 2018-05-03

ER

PT J

AU Surmann, M

Brunauer, W

- Bienert, S  
 AF Surmann, Markus  
 Brunauer, Wolfgang  
 Bienert, Sven
- TI How does energy efficiency influence the Market Value of office buildings in Germany and does this effect increase over time?
- SO JOURNAL OF EUROPEAN REAL ESTATE RESEARCH
- LA English
- DT Article
- DE Office buildings; Energy efficiency; Energy consumption; Energy performance certificates; Hedonic pricing; Valuation; Sustainable real estate
- AB Purpose - The paper aims to estimate the effect of energy efficiency on the Market Value of office buildings and consider whether this effect increases over time.  
 Design/methodology/approach - The authors analyze a dataset of office building valuations from 2009 to 2011, provided by the German Investment Property Database. The authors use hedonic regression models to determine the effect of energy efficiency and energy consumption on Market Values. Using generalized additive models (GAM) for modeling nonlinear covariate effects, the authors control for further building characteristics and location. Due to the small sample size, the authors introduce an innovative econometric approach that mitigates this problem.  
 Findings - Mainly due to the small sample size, and in spite of the newly developed econometric methodology, the authors do not find clear evidence of the relationship between energy efficiency and the Market Value. However, the study nonetheless provides interesting insights into the composition of office building Market Values in Germany.  
 Originality/value - In addition to the empirical results for the German office market, the main contribution of this paper lies in the econometric methodology. Beside the application of cutting-edge statistical techniques, the authors develop a method for handling datasets, for which the variable of interest is rarely observed, leveraging on the total available data. Thus, the methodology offers promising prospects for future research in similar settings.
- C1 [Surmann, Markus] METRO Properties Holding GmbH, Dusseldorf, Germany.  
 [Brunauer, Wolfgang] Real E Value Immobilien Bewertungen GmbH, Vienna, Austria.  
 [Bienert, Sven] Univ Regensburg, IREBS Competence Ctr Sustainable Real Estate, Regensburg, Germany.
- RP Surmann, M (reprint author), METRO Properties Holding GmbH, Dusseldorf, Germany.
- EM markus.surmann@metro-properties.de
- CR Baum A., 2004, J PROPERTY INVESTMEN, V22, P214  
 Baum A., 1997, CAUSES EFFECTS DEP  
 Baum A., 1991, PROPERTY DEPRECIATIO  
 Bienert S, 2010, INTEGRATION ENERGY P  
 Brunauer W., 2012, STAT DATEN ANAL Q3 2, VQ3, P90  
 Brunauer WA, 2010, J REAL ESTATE FINANC, V41, P390, DOI 10.1007/s11146-009-9177-z  
 Cajias M, 2013, J CORP REAL ESTATE, V15, P53, DOI 10.1108/JCRE-12-2012-0031  
 Chegut A, 2014, URBAN STUD, V51, P22, DOI 10.1177/0042098013484526  
 Crosby N., 2015, J REAL ESTATE RES  
 Crosby N, 2011, J EUR REAL ESTATE RE, V4, P7, DOI 10.1108/17539261111129443  
 Eichholtz P, 2010, AM ECON REV, V100, P2492, DOI 10.1257/aer.100.5.2492  
 Eilers PHC, 1996, STAT SCI, V11, P89, DOI 10.1214/ss/1038425655  
 Fahrmeir L, 2007, REGRESSION MODELLE M  
 Fuerst F, 2013, BUILD RES INF, V41, P373, DOI 10.1080/09613218.2013.780229  
 Fuerst F, 2011, ENERG POLICY, V39, P6608, DOI 10.1016/j.enpol.2011.08.005  
 Fuerst F, 2011, REAL ESTATE ECON, V39, P45, DOI 10.1111/j.1540-6229.2010.00286.x  
 HALVORSEN R, 1980, AM ECON REV, V70, P474  
 Hardy M. A., 1993, REGRESSION DUMMY VAR, P56  
 HypZert, 2010, EN GEB HAUPT NACHH  
 HypZert, 2010, NACHH IMM UNT BER WE  
 ImmoWert V, 2010, IMM  
 Kahn ME, 2014, J PUBLIC ECON, V113, P1, DOI 10.1016/j.jpubeco.2014.03.003  
 Kok N, 2012, ENERG POLICY, V46, P489, DOI 10.1016/j.enpol.2012.04.015  
 Leopoldsberger G., 2011, APPRAISAL J, V79, P115

Lorenz D, 2011, J PROP INVEST FINANC, V29, P644, DOI 10.1108/14635781111171797  
 Lorenz D, 2008, J PROP INVEST FINANC, V26, P482, DOI 10.1108/14635780810908361  
 Malpezzi S, 2003, HOUSING EC PUBLIC PO, P67  
 Mason C, 1996, HOUSING STUD, V11, P373, DOI 10.1080/02673039608720863  
 Meins E., 2011, NACHHALTIGKEIT WERTE  
 Pace K., 1998, J REAL ESTATE RES, V15, P77  
 Parmeter CF, 2007, J APPL ECONOM, V22, P695, DOI 10.1002/jae.929  
 Piazzolo D., 2012, IMMOBILIEN FINANZIER, V63, P84  
 Pivo G, 2010, J REAL ESTATE RES, V32, P243  
 Porter ME, 2006, HARVARD BUS REV, V84, P78  
 RICS, 2009, 13 RICS  
 RICS, 2013, GOING GREEN SUST BUI  
 RICS, 2015, GOING GREEN SUST BUI  
 ROSEN S, 1974, THE JOURNAL OF POLIT, V82, P35  
 Shimizu C., 2012, 10 REIT U BUS ETH CO  
 Wilke E., 2011, ANAL IMPACT PROPERTY  
 Wood S., 2006, INTRO GEN ADDITIVE M  
 Wood SN, 2003, J ROY STAT SOC B, V65, P95, DOI 10.1111/1467-9868.00374

NR 42

TC 1

Z9 1

U1 1

U2 1

PU EMERALD GROUP PUBLISHING LTD

PI BINGLEY

PA HOWARD HOUSE, WAGON LANE, BINGLEY BD16 1WA, W YORKSHIRE, ENGLAND

SN 1753-9269

J9 J EUR REAL ESTATE RE

J1 J. Eur. Real Estate Res.

PY 2015

VL 8

IS 3

BP 243

EP 266

DI 10.1108/JERER-04-2015-0018

PG 24

WC Business, Finance

SC Business & Economics

GA V08ZO

UT WOS:000214113500003

DA 2018-05-03

ER

PT J

AU Szumilo, N

AF Szumilo, Nikodem

TI How do office buildings take advantage of energy efficiency? A study of  
 the relationship between operating expenses and energy certification

SO INTERNATIONAL JOURNAL OF ENVIRONMENTAL TECHNOLOGY AND MANAGEMENT

LA English

DT Article

DE energy efficiency; operating expenses; corporate sustainability; green  
 real estate; low-energy office buildings; sustainable finance;  
 sustainable strategies implementation; sustainable consumer behaviour;  
 green buildings

AB This research examines the relationship of operating expenses and energy certification in US offices. Data for four markets over a period from Q1 2007 to Q1 2011 is used. EnergyStar certification scores are used to determine the level of energy efficiency and a hedonic pricing method to model operating expenses. The

results indicate a positive but non-linear relationship between costs and efficiency. Out of a number of considered explanations this seems to be best explained by initial technological difficulties in implementing energy efficiency, a self-selection bias influencing the data or a combination of different effects.

C1 [Szumilo, Nikodem] Univ Cambridge, Dept Land Econ, 19 Silver St, Cambridge CB3 9EP, England.  
RP Szumilo, N (reprint author), Univ Cambridge, Dept Land Econ, 19 Silver St, Cambridge CB3 9EP, England.

EM nikodem.szumilo@gmail.com

CR Chung W, 2009, ENER BUILDINGS, V41, P696, DOI 10.1016/j.enbuild.2009.02.001

Eichholtz P, 2010, AM ECON REV, V100, P2492, DOI 10.1257/aer.100.5.2492

Fuerst F., 2011, ECOLOGICAL EC, V6, P1220

Fuerst F, 2011, REAL ESTATE ECON, V39, P45, DOI 10.1111/j.1540-6229.2010.00286.x

Goodman J, 2004, J HOUS ECON, V13, P226, DOI 10.1016/j.jhe.2004.07.003

Hackett B., 1993, MARKET CONSUMER BARR

HAYES SC, 1977, J APPL BEHAV ANAL, V10, P425, DOI 10.1901/jaba.1977.10-425

Herring H, 2007, TECHNOVATION, V27, P194, DOI 10.1016/j.technovation.2006.11.004

Hughes W., 2004, 20 ANN ARCOM C 1 3 S

Hutcheson J. M., 1994, FACILITIES, V12, P11

LUTZENHISER L, 1993, ANNU REV ENERG ENV, V18, P247, DOI 10.1146/annurev.energy.18.1.247

Masoso OT, 2010, ENER BUILDINGS, V42, P173, DOI 10.1016/j.enbuild.2009.08.009

Miller N., 2010, J SUSTAINABLE REAL E, V2, P51

Perez-Lombard L, 2008, ENER BUILDINGS, V40, P394, DOI 10.1016/j.enbuild.2007.03.007

Pfafferott JU, 2007, ENER BUILDINGS, V39, P750, DOI 10.1016/j.enbuild.2007.02.005

Piper JE, 1999, OPERATIONS MAINTENAN

Pivo G, 2010, J REAL ESTATE RES, V32, P243

Sorrell S, 2008, ECOL ECON, V65, P636, DOI 10.1016/j.ecolecon.2007.08.013

Stluka P., 2011, P 18 IFAC WORLD C, P3108

Szumilo N., 2013, J SUSTAINABLE REAL E, V5

Wagner A, 2007, ENER BUILDINGS, V39, P758, DOI 10.1016/j.enbuild.2007.02.013

Webler T, 2010, ENER POLICY, V38, P2690, DOI 10.1016/j.enpol.2010.01.007

NR 22

TC 1

Z9 1

U1 1

U2 1

PU INDERSCIENCE ENTERPRISES LTD

PI GENEVA

PA WORLD TRADE CENTER BLDG, 29 ROUTE DE PRE-BOIS, CASE POSTALE 856, CH-1215

GENEVA, SWITZERLAND

SN 1466-2132

EI 1741-511X

J9 INT J ENVIRON TECHNO

J1 Int. J. Environ. Technol. Manag.

PY 2015

VL 18

IS 2

BP 116

EP 135

DI 10.1504/IJETM.2015.068973

PG 20

WC Engineering, Environmental

SC Engineering

GA V97FS

UT WOS:000213318300002

DA 2018-05-03

ER

PT J

AU Zhou, W  
Mountain, DC

AF Zhou, Wen  
Mountain, Dean C.

TI The benefits of combining utility-controlled demand response with residential zoned cooling

SO ENERGY EFFICIENCY

LA English

DT Article

DE Residential zoned cooling; Direct load control; Demand response

ID PEAK ELECTRICITY USE; LOAD CONTROL; CLIMATE

AB This paper evaluates the effectiveness of combining direct load control with a residential zoned-cooling technology in meeting the objectives of reducing peak demand and maintaining home comfort level. In contrast, the traditional approach has been for utilities to smooth summer peak cooling loads, by controlling the cooling load of the whole house. While accounting for weather, dwelling characteristics and demographics, with detailed field data, we are able to develop empirical models to evaluate the benefits of utility control of cooling loads for a residential zoned cooling system during summer peak-demand periods and to compare with non-zoned systems. A zoned house allows for an upper floor cooling interruption without affecting the comfort on the main floor. An upper floor interruption for a full 4 h during the day leads to an average peak air conditioning change of -0.52 kW, approximately 1.6 times the reduction from the curtailment of cooling by cycling the air conditioning serving the whole house.

C1 [Zhou, Wen; Mountain, Dean C.] McMaster Univ, DeGroote Sch Business, Hamilton, ON L8S 4M4, Canada.

[Zhou, Wen] Tongji Univ, Sch Econ & Management, Shanghai 200092, Peoples R China.

RP Mountain, DC (reprint author), McMaster Univ, DeGroote Sch Business, 1280 Main St W, Hamilton, ON L8S 4M4, Canada.

EM mountain@mcmaster.ca

FU Natural Resources Canada; Ontario Power Authority; Social Sciences and Humanities Research Council of Canada

FX Research funding was provided by Natural Resources Canada, Ontario Power Authority and Social Sciences and Humanities Research Council of Canada.

The analysis in this paper owes much to Terry Strack who oversaw the fieldwork portion of the pilot and to Jeremy Sager and Dan Carr who provided advice throughout the duration of the research. Thanks are also extended to three anonymous reviewers for their very helpful suggestions and comments.

CR American Meteorological Society, 2014, MET GLOSS

Ericson T, 2009, ENER POLICY, V37, P3502, DOI 10.1016/j.enpol.2009.03.063

Hamlet AF, 2010, CLIMATIC CHANGE, V102, P103, DOI 10.1007/s10584-010-9857-y

HSIAO C, 1987, RESOUR ENER, V9, P275

Kirby B., 2003, SPINNING RESERVES RE

Miller NL, 2008, J APPL METEOROL CLIM, V47, P1834, DOI 10.1175/2007JAMC1480.1

Mountain D. C., 2011, ZONE SAVER FIELD TRI

Mountain D. C., 2010, ADV RESIDENTIAL LOAD

Mountain D.C., 2007, RESIDENTIAL LOAD CON

Newsham GR, 2011, ENER POLICY, V39, P6376, DOI 10.1016/j.enpol.2011.07.038

Newsham GR, 2010, ENER POLICY, V38, P3289, DOI 10.1016/j.enpol.2010.01.027

PLATT HD, 1981, REGIONAL LOAD CURVE, V1

SUITS DB, 1978, REV ECON STAT, V60, P132, DOI 10.2307/1924341

NR 13

TC 1

Z9 1

U1 0

U2 3

PU SPRINGER

PI DORDRECHT

PA VAN GODEWIJCKSTRAAT 30, 3311 GZ DORDRECHT, NETHERLANDS

SN 1570-646X

EI 1570-6478  
 J9 ENERGEN EFFIC  
 JI Energy Effic.  
 PD DEC  
 PY 2014  
 VL 7  
 IS 6  
 BP 1067  
 EP 1099  
 DI 10.1007/s12053-014-9265-7  
 PG 33  
 WC GREEN & SUSTAINABLE SCIENCE & TECHNOLOGY; Energy & Fuels; Environmental  
 Studies  
 SC Science & Technology - Other Topics; Energy & Fuels; Environmental  
 Sciences & Ecology  
 GA AS8ZN  
 UT WOS:000344533500008  
 DA 2018-05-03  
 ER

PT S

AU De Rose, R

Felicetti, C

Raso, C

Felicetti, AM

Ammirato, S

AF De Rose, Raffaele

Felicetti, Carmelo

Raso, Cinzia

Felicetti, Alberto Michele

Ammirato, Salvatore

BE CamarinhaMatos, LM

Afsarmanesh, H

TI A Framework for Energy-Efficiency in Smart Home Environments

SO COLLABORATIVE SYSTEMS FOR SMART NETWORKED ENVIRONMENTS

SE IFIP Advances in Information and Communication Technology

LA English

DT Proceedings Paper

CT 15th IFIP WG 5.5 Working Conference on Virtual Enterprises (PRO-VE)

CY OCT 06-08, 2014

CL Amsterdam, NETHERLANDS

SP IFIP WG 5.5 Co Operat infrastructure for Virtual Enterprises & Elect Business, Soc Collaborat Networks,

IEEE Syst Man & Cybernet Soc, Univ Amsterdam, New Univ Lisbon, UNINOVA

DE Energy Efficiency; Smart Home Environment (SHE); Interoperable Home

Energy Management Systems (HEMS); Information Management Model; Energy

Consumption Forecasting

ID LOAD; NETWORKS

AB A resource-efficient Europe is a pillar of the EU 2020 program which aims at smart, sustainable, inclusive growth. The diffusion of smart networked environments, wherein humans, intelligent agents and devices collaborate, is fundamental for achieving energy-efficiency in buildings. In this context, this paper deals with the topic of Smart Home Environments (SHEs), where users can exploit multimedia services to interact with heterogeneous and interconnected smart appliances in order to save energy, reduce costs and improve users' comfort and safety. In particular, we propose an interoperable architectural framework and a related knowledge-based management model, associated with a specific forecasting model, for monitoring and managing energy consumption in SHEs.

C1 [De Rose, Raffaele; Felicetti, Carmelo; Raso, Cinzia] Social Innovat Res Project PON04a3 00506, Smart Bldg La Nuova Tecnol Efficienza Energet & Q, I-87036 Arcavacata Di Rende, CS, Italy.

[Felicetti, Alberto Michele; Ammirato, Salvatore] Univ Calabria, Dept Mech Energy & Management Engn, I-87036 Arcavacata Di Rende, CS, Italy.

RP De Rose, R (reprint author), Social Innovat Res Project PON04a3 00506, Smart Bldg La Nuova Tecnol Efficienza Energet & Q, Pedro Alvares Cabral 18, I-87036 Arcavacata Di Rende, CS, Italy.

EM raffaele.derose@smartbuildingproject.it;  
 carmelo.felicetti@smartbuildingproject.it;  
 cinzia.raso@smartbuildingproject.it; alberto.felicetti@unical.it;  
 salvatore.ammirato@unical.it

OI De Rose, Raffaele/0000-0003-1184-1721; Ammirato, Salvatore/0000-0001-6617-3789

CR D& R International Ltd., 2012, 2011 BUILD EN DAT BO  
 Das SK, 2005, LECT NOTES COMPUT SC, V3776, P80  
 Elmenreich W., 2012, Proceedings of the 2012 10th Workshop on Intelligent Solutions in Embedded Systems (WISES 2012), P76  
 Hippert HS, 2001, IEEE T POWER SYST, V16, P44, DOI 10.1109/59.910780  
 Niyato D, 2011, IEEE COMMUN MAG, V49, P53, DOI 10.1109/MCOM.2011.5741146  
 Perez-Lombard L, 2008, ENERG BUILDINGS, V40, P394, DOI 10.1016/j.enbuild.2007.03.007  
 Perumal T, 2008, SITIS 2008: 4TH INTERNATIONAL CONFERENCE ON SIGNAL IMAGE TECHNOLOGY AND INTERNET BASED SYSTEMS, PROCEEDINGS, P177, DOI 10.1109/SITIS.2008.94  
 Peruzzini M, 2013, IFIP ADV INF COMM TE, V408, P393  
 Soares LJ, 2008, INT J FORECASTING, V24, P630, DOI 10.1016/j.ijforecast.2008.08.003  
 Taylor JW, 2007, IEEE T POWER SYST, V22, P2213, DOI 10.1109/TPWRS.2007.907583  
 Volpentesta AP, 2012, IFIP ADV INF COMM TE, V380, P571

NR 11  
 TC 1  
 Z9 1  
 U1 0  
 U2 0  
 PU SPRINGER-VERLAG BERLIN  
 PI BERLIN  
 PA HEIDELBERGER PLATZ 3, D-14197 BERLIN, GERMANY  
 SN 1868-4238  
 BN 978-3-662-44744-4  
 J9 IFIP ADV INF COMM TE  
 PY 2014  
 VL 434  
 BP 237  
 EP 244  
 PG 8  
 WC Computer Science, Hardware & Architecture; Computer Science, Information Systems; Telecommunications  
 SC Computer Science; Telecommunications  
 GA BD3QR  
 UT WOS:000360082700023  
 DA 2018-05-03  
 ER

PT B  
 AU Peng, XH  
 Bessho, M  
 Koshizuka, N  
 Sakamura, K  
 AF Peng, Xiaohui  
 Bessho, Masahiro  
 Koshizuka, Noboru  
 Sakamura, Ken  
 GP IEEE  
 TI A Framework for Peak Electricity Demand Control Utilizing Constraint



Programing Method in Smart Building  
 SO 2014 IEEE 3RD GLOBAL CONFERENCE ON CONSUMER ELECTRONICS (GCCE)  
 LA English  
 DT Proceedings Paper  
 CT 3rd IEEE Global Conference on Consumer Electronics (GCCE)  
 CY OCT 07-10, 2014  
 CL Tokyo, JAPAN  
 SP IEEE  
 DE peak electricity demand control; smart building; energy saving policy;  
 constraint programing  
 AB Reducing large electricity consumption is a primary concern for researchers and practitioners in smart buildings. Peak electricity demand is the result of temporarily correlated energy demand surges caused by uncoordinated operation of subsystems such as air-conditioning, heating, ventilating and so on. It might cause severe issues such as service disruption and high cost of energy production and distribution. Many buildings applied various energy saving policies with building automation system to control the behaviors of smart devices to save energy. In this paper, we propose a framework for peak electricity demand control based on constraint programing technology in smart building.  
 C1 [Peng, Xiaohui; Bessho, Masahiro; Koshizuka, Noboru; Sakamura, Ken] Univ Tokyo, Grad Sch Interdisciplinary Informat Studies, Interfac Initiat Informat Studies, Tokyo, Japan.  
 RP Peng, XH (reprint author), Univ Tokyo, Grad Sch Interdisciplinary Informat Studies, Interfac Initiat Informat Studies, Tokyo, Japan.  
 EM peng@sakamura-lab.org; besshy@sakamura-lab.org;  
 koshizuka@sakamura-lab.org; ken@sakamura-lab.org  
 CR Dolan MJ, 2013, IEEE T SMART GRID, V4, P798, DOI 10.1109/TSG.2012.2234148  
 Erickson V. L., 2013, IPSN 13  
 Erickson V. L., 2011, IPSN 11  
 Farias C., UIC ATC IEEE 2013  
 Han Jinsoo, 2011, INT C INT BUILD MAN  
 Koehler C., 2013, UBICOMP 13, P103  
 Sakamura K., 2014, TRONWARE, V148  
 Scott J., 2011, UBICOMP 11  
 Whitehouse K., 2013, ICCPS 13  
 Tomic S., 2010, I SEMANTICS  
 VANHENTENRYCK P, 1992, ARTIF INTELL, V58, P113, DOI 10.1016/0004-3702(92)90006-J  
 Wang L., 2012, IEEE T SMART GRID, V3  
 NR 12  
 TC 1  
 Z9 1  
 U1 0  
 U2 0  
 PU IEEE  
 PI NEW YORK  
 PA 345 E 47TH ST, NEW YORK, NY 10017 USA  
 PY 2014  
 BP 744  
 EP 748  
 PG 5  
 WC Engineering, Electrical & Electronic  
 SC Engineering  
 GA BF6CK  
 UT WOS:000382964400257  
 DA 2018-05-03  
 ER  
  
 PT S  
 AU Sanseverino, ER  
 Sanseverino, RR  
 Scaccianoce, G

- Vaccaro, V  
 AF Sanseverino, Eleonora Riva  
 Sanseverino, Raffaella Riva  
 Scaccianoce, Gianluca  
 Vaccaro, Valentina  
 BE Murgante, B  
 Misra, S  
 Rocha, AMAC  
 Torre, C  
 Rocha, JG  
 Falcao, MI  
 Taniar, D  
 Apduhan, BO  
 Gervasi, O  
 TI Municipal Building Regulations for Energy Efficiency in Southern Italy  
 SO COMPUTATIONAL SCIENCE AND ITS APPLICATIONS - ICCSA 2014, PT II  
 SE Lecture Notes in Computer Science  
 LA English  
 DT Proceedings Paper  
 CT 14th International Conference on Computational Science and Its  
 Applications (ICCSA)  
 CY JUN 30-JUL 03, 2014  
 CL Guimaraes, PORTUGAL  
 SP Univ Minho, Univ Perugia, Univ Basilicata, Monash Univ, Kyushu Sangyo Univ, Assoc Portuguesa  
 Investigacao Operac  
 DE Sustainable urban planning; Energy efficiency in buildings; Municipal  
 building regulation  
 AB The building sector is still one of the most energy consuming sectors in Italy, like developed countries in  
 Europe. At European level, the main policy driver related to the energy use in buildings is the Energy  
 Performance of Buildings Directive (EPBD, 2002/91/EC) and its recast. Through the EPBD introduction,  
 requirements for certification, inspections, training or renovation are now imposed in Member States. In  
 order to fulfill the expected changes, local regulations are a key factor aiming at sustainable territorial  
 planning. It is thus required support the issue of local rules at municipal level in order to guide local  
 administrators and technicians and to limit discretionary power of bureaucracy. In this paper, a review of  
 the most common practices for building regulations in Europe and in Italy is proposed, then the role and  
 the framework of a municipal building regulation for the Southern European area accounting for  
 sustainability features is discussed.  
 C1 [Sanseverino, Eleonora Riva; Scaccianoce, Gianluca; Vaccaro, Valentina] Univ Palermo, Dept Energy,  
 Palermo, Italy.  
 [Sanseverino, Raffaella Riva] Univ Palermo, Dept Architecture, DARCH, Palermo, Italy.  
 RP Sanseverino, ER (reprint author), Univ Palermo, Dept Energy, Palermo, Italy.  
 EM eleonora.rivasanseverino@unipa.it; raffaella.rivasanseverino@gmail.com;  
 gianluca.scaccianoce@unipa.it; valentina.vaccaro.pa@gmail.com  
 RI riva sanseverino, eleonora/R-6856-2016  
 OI vaccaro, valentina/0000-0001-9888-0314; Scaccianoce,  
 Gianluca/0000-0003-2193-8949  
 CR Comune di Bologna, 2009, REG URB ED CITT BOL  
 Comune di Monterotondo, 2009, NORM SOST AMB ALL RE  
 [Anonymous], 2013, LEG INN EN ED REG ED  
 Dama A., 2005, PROGETTO SOSTENIBILE, V2005, P60  
 Ford B., 2007, PASSIVHAUS STANDAR 3  
 Infoenergia Dipartimento BEST Politecnico di Milano, 2012, DEF REG STRUM URB OR  
 Initiative for Low Energy Training in Europe (ILETE), 2010, INITIATIVE LOW ENER  
 Legambiente, 2012, REG ED IT  
 Pagliano L., 2009, PASSIVHAUS SUD EUROP  
 PRC Bouwcentrum International Delft University of Technology Bodegraven, 2011, LEAD MARK IN  
 SUST CO  
 Unita Tecnica Efficienza Energetica dell'ENEA, 2012, RAEE 2011

[Anonymous], 2008, 15251 UNI EN  
 [Anonymous], 2008, 137862008 UNI EN ISO  
 Vaccaro V., 2014, SMART RULES SMART CI, V12, P75  
 Varga M., 2007, SERVICE BUILDINGS KE  
 Zangheri P., 2009, ECEEE SUMMER STUDY A, P1643  
 NR 16  
 TC 1  
 Z9 1  
 U1 0  
 U2 1  
 PU SPRINGER-VERLAG BERLIN  
 PI BERLIN  
 PA HEIDELBERGER PLATZ 3, D-14197 BERLIN, GERMANY  
 SN 0302-9743  
 BN 978-3-319-09129-7; 978-3-319-09128-0  
 J9 LECT NOTES COMPUT SC  
 PY 2014  
 VL 8580  
 BP 420  
 EP +  
 PG 3  
 WC Computer Science, Information Systems; Computer Science, Software  
 Engineering; Computer Science, Theory & Methods  
 SC Computer Science  
 GA BC0TI  
 UT WOS:000349532500032  
 DA 2018-05-03  
 ER  
  
 PT B  
 AU Slini, T  
 Giama, E  
 Papadopoulos, AM  
 AF Slini, Theodora  
 Giama, Efrosini  
 Papadopoulos, Agis M.  
 GP IEEE  
 TI On the elasticity of residential energy consumption  
 SO 5TH INTERNATIONAL CONFERENCE ON INFORMATION, INTELLIGENCE, SYSTEMS AND  
 APPLICATIONS, IISA 2014  
 LA English  
 DT Proceedings Paper  
 CT 5th International Conference on Information, Intelligence, Systems and  
 Applications (IISA)  
 CY JUL 07-09, 2014  
 CL Chania, GREECE  
 SP Inst Elect & Elect Engineers, Biol & Artificial Intelligence Fdn, Univ Piraeus  
 DE Disposable income; residential energy consumption; elasticity  
 AB The current paper discusses the analysis of the results that emerged from a field study conducted in two  
 consecutive years, aiming at the assessment of the economic recession's impact on the consumers'  
 behaviour regarding energy consumption and space heating. The field survey was carried out, by means of  
 interviews with questionnaires, in Northern Greece, an area where there is an increased energy demand  
 for space heating compared to Athens and Southern Greece and hence an intensive need for efficient and  
 effective solutions. The results of the field study, which has been carried out between 2011 and 2013, were  
 analysed in order to identify major tendencies, if any, in the consumers' behaviour, with respect to the  
 prevailing energy prices and the disposable household income. In that sense determining the degree of  
 elasticity of residential energy consumption can be determined in a bottom-up approach and compared to  
 the national average values for the same period. A further goal was to capture details that are helpful in

order to understand technological choices and behavioural patterns when it comes to coping with a lesser income and increased energy costs.

C1 [Slini, Theodora; Giama, Efrosini; Papadopoulos, Agis M.] Aristotle Univ Thessaloniki, Dept Mech Engr, GR-54006 Thessaloniki, Greece.

RP Slini, T (reprint author), Aristotle Univ Thessaloniki, Dept Mech Engr, GR-54006 Thessaloniki, Greece.  
EM lora@aix.meng.auth.gr

OI Papadopoulos, Agis/0000-0002-4470-8903

CR [Anonymous], 2012, ODYSSEE MURE 2010 MO

EEA (European Environment Agency), 2011, 2011 SURV RES EFF PO

EL.STAT (Hellenic Statistical Authority), 2012, SURV INC HOUS COND G

Eurostat, 2013, F4 QUAL LIF IN KEEP

I.E.A, 2011, EN POL IEA COUNTR GR

IEA, 2013, EN POL HIGHL

OECD, GREEC GLANC POL SUST

Papadopoulos A.M., 2011, ADV BUILDING ENERGY, V1, P105

Santamouris M, 2013, ENERGBUILDINGS, V65, P477, DOI 10.1016/j.enbuild.2013.06.024

Slini T, 2015, INT J SUSTAIN ENERGY, V34, P259, DOI 10.1080/14786451.2014.882335

World Economic Forum, 2012, EN EC GROWTH EN VIS

NR 11

TC 1

Z9 1

U1 0

U2 0

PU IEEE

PI NEW YORK

PA 345 E 47TH ST, NEW YORK, NY 10017 USA

PY 2014

BP 349

EP 354

PG 6

WC Computer Science, Artificial Intelligence; Computer Science, Information Systems

SC Computer Science

GA BB7PA

UT WOS:000345861900100

DA 2018-05-03

ER

FN Clarivate Analytics Web of Science

VR 1.0

PT J

AU Voss, K

Kunz, C

AF Voss, Karsten

Kuenz, Carolin

TI Climate data and climate change - Analysis of the influence on energy demand, performance requirement and thermal comfort of buildings.

SO BAUPHYSIK

LA German

DT Article

AB Climate data and climate change - Analysis of the influence on energy demand, performance requirement and thermal comfort of buildings. Continuous research on climate change has improved the knowledge on climate forecast modelling, so that local and regional climate data sets for the application in building energy modelling are available. The paper analyses the data sets of most known sources and compares the relevant characteristics at four German locations. Simulation results for three commercial building examples (office, school and hotel) illustrate how the climate change may influence heating and cooling demands and capacities as well as the summer thermal comfort if no adjustments with respect to construction, service technology and user behaviour are applied. A significant decrease in space heating demand is contrasted by increased cooling demand and increased indoor temperatures during summer

even until 2050. Especially for the office buildings, the summer conditions develop critical, so that active cooling will be mandatory in the summer hot regions. This trend was already detected during the past decade. The forecast is critical for all existing buildings. Significant improvements of the envelope properties such as glazing or shading and passive cooling options become mandatory. The changes predicted for schools and hotels remain moderate.

C1 [Voss, Karsten] Berg Univ Wuppertal, Fachbereich Architektur D, D-42285 Wuppertal, Germany.

[Kuenz, Carolin] Berg Univ Wuppertal, Fachgebiet Bauphys & Tech Gebaudeausrustung, D-42285 Wuppertal, Germany.

RP Voss, K (reprint author), Berg Univ Wuppertal, Fachbereich Architektur D, Haspeler Str 27, D-42285 Wuppertal, Germany.

CR Bernard S., 2012, DTSCHE BAUZEITUNG

Deutscher Wetterdienst. Klimastatusbericht, 2003, KLIM 2003

[Anonymous], 2011, 1859910201112 DIN V

[Anonymous], 2006, 7730200605 DIN EN IS

[Anonymous], 2007, 15251200708 DIN EN

Frank T, 2005, ENERGI BUILDINGS, V37, P1175, DOI 10.1016/j.enbuild.2005.06.019

Hoffmann C, 2007, THESIS U WUPPERTAL B

Holmes J. M., 2007, ENERGI BUILDINGS, V39, P802

Kalz D, 2011, THESIS U KARLSRUHE

Klauss S., 2010, ENTWICKLUNG DATENBAN

Lichtmess M, 18599 DIN V

Pultz G, 2007, BAUPHYSIK, V29, P99, DOI 10.1002/bapi.200710016

Voss K., 2007, SCHRIFTENREIHE BUNDE

Voss K., 2011, HLH, V62, p[10, 18]

Voss T., 2012, MIKROKLIMATISCHE BAU

NR 15

TC 1

Z9 1

U1 0

U2 15

PU ERNST & SOHN

PI BERLIN

PA ROTHERSTRASSE 21, BERLIN, DEUTSCHLAND 10245, GERMANY

SN 0171-5445

J9 BAUPHYSIK

JI Bauphysik

PD OCT

PY 2012

VL 34

IS 5

BP 189

EP 196

DI 10.1002/bapi.201200027

PG 8

WC Construction & Building Technology

SC Construction & Building Technology

GA 015NP

UT WOS:000309453500004

DA 2018-05-03

ER

PT S

AU Borggaard, J

Cliff, E

Gugercin, S

AF Borggaard, Jeff

Cliff, Eugene

Gugercin, Serkan

GP IEEE

TI Model Reduction for Indoor-Air Behavior in Control Design for  
Energy-Efficient Buildings

SO 2012 AMERICAN CONTROL CONFERENCE (ACC)

SE Proceedings of the American Control Conference

LA English

DT Proceedings Paper

CT American Control Conference (ACC)

CY JUN 27-29, 2012

CL Montreal, CANADA

SP Boeing, Bosch, Corning, Eaton, GE Global Res, Honeywell, MathWorks, Mitsubishi Elect Res Lab, Natl  
Instruments, Xerox, Adept MobileRobots, Momentum Press, Quanser, SIAM, Springer, Taylor & Francis,  
United Technologies Res Ctr, Visual Solut, Wiley-Blackwell

ID SYSTEMS; APPROXIMATION; ALGORITHM

AB We present two methods for generating reduced-order models for the indoor-air environment in control  
design for energy efficient buildings. In one method, projection-based H-2-optimal interpolatory model  
reduction techniques are employed on a high-dimensional state-space model resulting from finite element  
discretization of convection-diffusion equations. In the second approach, we obtain reduced-models  
directly from input and output measurements using a data-driven model reduction approach. In both  
cases, we produce reduced-order models that accurately represent the input-output behavior of the full-  
order system.

C1 [Borggaard, Jeff; Cliff, Eugene; Gugercin, Serkan] Virginia Tech, Interdisciplinary Ctr Appl Math,  
Blacksburg, VA 24061 USA.

RP Borggaard, J (reprint author), Virginia Tech, Interdisciplinary Ctr Appl Math, Blacksburg, VA 24061 USA.

EM jborggaard@vt.edu; ecliff@vt.edu; gugercin@vt.edu

RI Borggaard, Jeff/I-5585-2017

OI Borggaard, Jeff/0000-0002-4023-7841

CR Ahuja K., 2008, SIAM J SCI COMPUTING

Antoulas A., 2005, APPROXIMATION LARGE

Beattie C. A., 2009, P 48 IEEE C DEC CONT

Beattie CA, 2007, 46 IEEE C DEC CONTR, P4385

Bunse-Gerstner A, 2010, J COMPUT APPL MATH, V233, P1202, DOI 10.1016/j.cam.2008.12.029

Flagg C. A., 2012, SYSTEMS CON IN PRESS

Fulcheri P, 1998, SIAM J CONTROL OPTIM, V36, P2103, DOI 10.1137/S0363012995284230

Gallivan K, 2004, SIAM J MATRIX ANAL A, V26, P328, DOI 10.1137/S0895479803423925

Gugercin S, 2008, SIAM J MATRIX ANAL A, V30, P609, DOI 10.1137/060666123

Gugercin S., 2005, HOUS S 16 7 SPRINGS

Kalman R. E., 1979, ACTA POLYTECH SCAND, V31, P9

Kung S. Y., 1978, P 12 AS C CIRC SYST, P705

Mayo AJ, 2007, LINEAR ALGEBRA APPL, V425, P634, DOI 10.1016/j.laa.2007.03.008

MEIER L, 1967, IEEE T AUTOMAT CONTR, VAC12, P585, DOI 10.1109/TAC.1967.1098680

SPANOS JT, 1992, AUTOMATICA, V28, P897, DOI 10.1016/0005-1098(92)90143-4

Van Dooren P, 2008, APPL MATH LETT, V21, P1267, DOI 10.1016/j.aml.2007.09.015

WILSON DA, 1970, P I ELECTR ENG, V117, P1161, DOI 10.1049/piee.1970.0227

ZIGIC D, 1993, LINEAR ALGEBRA APPL, V188, P665, DOI 10.1016/0024-3795(93)90484-6

NR 18

TC 1

Z9 1

U1 0

U2 1

PU IEEE COMPUTER SOC

PI LOS ALAMITOS

PA 10662 LOS VAQUEROS CIRCLE, PO BOX 3014, LOS ALAMITOS, CA 90720-1264 USA

SN 0743-1619

BN 978-1-4577-1096-4

J9 P AMER CONTR CONF

PY 2012

BP 2283

EP 2288

PG 6

WC Automation & Control Systems; Engineering, Electrical & Electronic

SC Automation & Control Systems; Engineering

GA BCN53

UT WOS:000310776202094

DA 2018-05-03

ER

PT S

AU Domahidi, A

Ullmann, F

Morari, M

Jones, CN

AF Domahidi, Alexander

Ullmann, Fabian

Morari, Manfred

Jones, Colin N.

GP IEEE

TI Learning Near-optimal Decision Rules for Energy Efficient Building Control

SO 2012 IEEE 51ST ANNUAL CONFERENCE ON DECISION AND CONTROL (CDC)

SE IEEE Conference on Decision and Control

LA English

DT Proceedings Paper

CT 51st IEEE Annual Conference on Decision and Control (CDC)

CY DEC 10-13, 2012

CL HI

SP IEEE, Soc Ind & Appl Math, Inst Operat Res Management Sci, Japanese Soc Instrument & Control Engineers, European Union Control Assoc, Int Federat Automat Control, Elsevier, GE Global Res, MathWorks, Springer, Univ Hawaii Manoa, Coll Engr, Univ Texas Dallas, Journal Franklin Inst, Engr & Appl Math, Taylor & Francis Grp, Visual Solut, Wolfram Res

AB Recent studies suggest that advanced optimization based control methods such as model predictive control (MPC) can increase energy efficiency of buildings. However, adoption of these methods by industry is still slow, as building operators are used to working with simple controllers based on intuitive decision rules that can be tuned easily on-site. In this paper, we suggest a synthesis procedure for rule based controllers that extracts prevalent information from simulation data with MPC controllers to construct a set of human readable rules while preserving much of the control performance. The method is based on the ADABOOST algorithm from the field of machine learning. We focus on learning binary decisions, considering also the ranking and selection of measurements on which the decision rules are based. We show that this feature selection is useful for both complexity reduction and decreasing investment costs by pruning unnecessary sensors. The proposed method is evaluated in simulation for six different case studies and is shown to maintain the high performance of MPC despite the tremendous reduction in complexity.

C1 [Domahidi, Alexander; Ullmann, Fabian; Morari, Manfred] ETH, Dept Informat Technol & Elect Engr, Automat Control Lab, CH-8092 Zurich, Switzerland.

[Jones, Colin N.] Ecole Polytech Fed Lausanne, Automat Control Lab, CH-1015 Lausanne, Switzerland.

RP Domahidi, A (reprint author), ETH, Dept Informat Technol & Elect Engr, Automat Control Lab, CH-8092 Zurich, Switzerland.

EM domahida@ee.ethz.ch; ullmannf@ee.ethz.ch; morari@ee.ethz.ch; colin.jones@epfl.ch

RI Sun, JT/G-1703-2015; Jones, Colin/N-2878-2013

OI Jones, Colin/0000-0001-7239-4799

CR Coffey B., 2012, THESIS

Cucker F, 2007, C MO AP C M, P1, DOI 10.1017/CBO9780511618796

Domahidi A., 2012, P 51 C DEC CONTR MAU

Domahidi A, 2011, IEEE DECIS CONTR P, P513, DOI 10.1109/CDC.2011.6161258

Freund Y., 1995, LNCS, V904, P23, DOI DOI 10.1007/3-540-59119-2\_

Garey M. R., 1979, COMPUTERS INTRACTABI  
 Goulart PJ, 2006, AUTOMATICA, V42, P523, DOI 10.1016/j.automat.2005.08.023  
 Gyalistras D., 2009, TECH REP  
 Kelman A., 2011, P IFAC WORLD C  
 Lofberg J., 2004, P CACSD TAIP TAIW  
 Lute P.J., 1992, USE PREDICTIONS TEMP  
 Ma YD, 2012, IEEE CONTR SYST MAG, V32, P44, DOI 10.1109/MCS.2011.2172532  
 May-Ostendorp P, 2011, BUILD ENVIRON, V46, P428, DOI 10.1016/j.buildenv.2010.08.004  
 Oldewurtel F., 2011, ENERGY BUILDINGS  
 Perez-Lombard L, 2008, ENERGBUILDINGS, V40, P394, DOI 10.1016/j.enbuild.2007.03.007  
 Privara S, 2011, ENERGBUILDINGS, V43, P564, DOI 10.1016/j.enbuild.2010.10.022  
 Torrisi FD, 2004, IEEE T CONTR SYST T, V12, P235, DOI 10.1109/TCST.2004.824309  
 Ullmann F., 2009, THESIS  
 Vezhnevets A., 2010, GML ADABOOOST TOOLBO  
 Viola P, 2004, INT J COMPUT VISION, V57, P137, DOI 10.1023/B:VISI.0000013087.49260.fb  
 Wang Y, 2010, IEEE T CONTR SYST T, V18, P267, DOI 10.1109/TCST.2009.2017934

NR 21

TC 1

Z9 1

U1 0

U2 1

PU IEEE

PI NEW YORK

PA 345 E 47TH ST, NEW YORK, NY 10017 USA

SN 0743-1546

BN 978-1-4673-2066-5

J9 IEEE DECIS CONTR P

PY 2012

BP 7571

EP 7576

PG 6

WC Automation & Control Systems; Computer Science, Artificial Intelligence;  
 Engineering, Electrical & Electronic

SC Automation & Control Systems; Computer Science; Engineering

GA BIB20

UT WOS:000327200407128

DA 2018-05-03

ER

PT S

AU Ryu, MW

Kim, J

Lee, SS

Ahn, IY

Yun, J

AF Ryu, Min-Woo

Kim, Jaeho

Lee, Sang-Shin

Ahn, Il-Yeup

Yun, Jaeseok

BE Kim, TH

Ramos, C

Abawajy, J

Kang, BH

Slezak, D

Adeli, H

TI Design of Rule Model for Building Energy Efficiency Base on User  
 Occupancy and Spatial Features



SO COMPUTER APPLICATIONS FOR MODELING, SIMULATION, AND AUTOMOBILE

SE Communications in Computer and Information Science

LA English

DT Proceedings Paper

CT International Conference on Modeling and Simulation (MAS

2012)/International Conference on Automotive Science and Technology

(asnt 2012)

CY NOV 28-DEC 02, 2012

CL Jeju, SOUTH KOREA

DE Energy Efficiency; Energy Saving; Rule Model; User Occupancy; Spatial  
Features

AB Due to energy shortage and energy price increase, many researchers have been working on improving energy use efficiency using information and communication technology. In most of these studies, however, energy management and saving is performed by detecting a user's particular situation with sensors and then applying the rules predefined. This style of energy saving and management using static rules would improve energy use efficiency, but also decrease user comfort level at the same time. Because energy use pattern depends strongly on changes in human behavior, the rules for managing energy use should be dynamically updated. In this paper, we first define spatial properties and propose a rule model where rules could be dynamically updated according to user feedback and applied to various situations.

C1 [Ryu, Min-Woo; Kim, Jaeho; Lee, Sang-Shin; Ahn, Il-Yeup; Yun, Jaeseok] Korea Elect Technol Inst, Embedded Software Convergence Res Ctr, Songnam, South Korea.

RP Ryu, MW (reprint author), Korea Elect Technol Inst, Embedded Software Convergence Res Ctr, 68 Yatap Dong, Songnam, South Korea.

EM minu@keti.re.kr; jhkim@keti.re.kr; sslee@keti.re.kr; iyahn@keti.re.kr;  
jaeseok@keti.re.kr

CR Baer D. M., 1968, J APPL BEHAV ANAL

Crawley D. B., 2001, ORIGINAL RES ARTICLE, V33

Crawley D. B., 2008, BUILDING ENV, V43

Hodges W., 2001, BLACKWELL GUIDE PHIL

Wei C., 2011, ICECC

NR 5

TC 1

Z9 1

U1 0

U2 2

PU SPRINGER-VERLAG BERLIN

PI BERLIN

PA HEIDELBERGER PLATZ 3, D-14197 BERLIN, GERMANY

SN 1865-0929

BN 978-3-642-35247-8

J9 COMM COM INF SC

PY 2012

VL 341

BP 58

EP 63

PG 6

WC Computer Science, Information Systems; Computer Science, Theory &  
Methods

SC Computer Science

GA BEB94

UT WOS:000316030600009

DA 2018-05-03

ER

PT J

AU Thomas, VM

Meier, AK

Gunda, SG

Wenzel, TP  
 AF Thomas, Valerie M.  
 Meier, Alan K.  
 Gunda, Siva G.  
 Wenzel, Thomas P.

TI Cars are buildings: Building-like energy use in automobiles  
 SO TRANSPORTATION RESEARCH PART D-TRANSPORT AND ENVIRONMENT  
 LA English  
 DT Article  
 DE Light-duty vehicles; Air-conditioning costs; Electricity use in vehicles  
 AB This paper examines vehicle energy use as if vehicles were buildings. Vehicle air conditioners are much less efficient than residential air conditioners, and in the US consume about 0.9 quadrillion BTUs (quads) per year, comparable to the 2.3 by air conditioners in residences. Vehicle heating, in contrast, is a model of efficiency, running as a combined-heat-and-power system using waste heat from the motor. Electricity use from appliances such as DVD players, laptops, and refrigerators remains modest, although stand-by power use is growing. Technology and policy approaches used for buildings can address similar types of energy use in cars. (C) 2011 Elsevier Ltd. All rights reserved.

C1 [Thomas, Valerie M.] Georgia Inst Technol, Sch Publ Policy, Atlanta, GA 30332 USA.  
 [Thomas, Valerie M.] Georgia Inst Technol, Sch Ind & Syst Engn, Atlanta, GA 30332 USA.  
 [Meier, Alan K.; Wenzel, Thomas P.] Univ Calif Berkeley, Lawrence Berkeley Lab, Berkeley, CA 94720 USA.  
 [Gunda, Siva G.] Univ Calif Davis, Dept Mech Engn, Davis, CA 95616 USA.

RP Thomas, VM (reprint author), Georgia Inst Technol, Sch Publ Policy, 685 Cherry St, Atlanta, GA 30332 USA.

EM valerie.thomas@isye.gatech.edu  
 OI Thomas, Valerie/0000-0002-0968-8863; Meier, Alan/0000-0002-1260-2151

CR Bosch R., 1996, AUTOMOTIVE HDB  
 \*CA AIR RES BOARD, 2009, COOL CARS REFL GLAZ  
 DAVIS S, 2009, TABLE 2 6 TRANSPORTA  
 FARRINGTON RB, 2000012694 SAE  
 \*GAT CORP, 2006, SEL RIGHT DRIV SYST  
 International Energy Agency, 2006, LIGHTS LAB LOST  
 Rugh J., 2004, 15 ANN EARTH TECHN F  
 \*US DOE, 2008, ADV TECHN EN EFF  
 The U.S. Department of Energy, 1995, PRIM LEAD AC STOR BA  
 United States Department of Energy, 2009, 2009 BUILD EN DAT BO  
 \*US EPA, 2009, EPA420D09003  
 2009, FED REG 0928, V74, P49454

NR 12  
 TC 1  
 Z9 1  
 U1 0  
 U2 2

PU PERGAMON-ELSEVIER SCIENCE LTD  
 PI OXFORD  
 PA THE BOULEVARD, LANGFORD LANE, KIDLINGTON, OXFORD OX5 1GB, ENGLAND  
 SN 1361-9209  
 J9 TRANSPORT RES D-TR E  
 JI Transport. Res. Part D-Transport. Environ.  
 PD JUN  
 PY 2011  
 VL 16  
 IS 4  
 BP 341  
 EP 345  
 DI 10.1016/j.trd.2011.01.010  
 PG 5  
 WC Environmental Studies; Transportation; Transportation Science &

- Technology  
 SC Environmental Sciences & Ecology; Transportation  
 GA 745QS  
 UT WOS:000289181300012  
 DA 2018-05-03  
 ER
- PT S  
 AU Spataru, C  
 Gillott, M  
 AF Spataru, Catalina  
 Gillott, Mark  
 BE Howlett, RJ  
 Jain, LC  
 Lee, SH
- TI The Use of Intelligent Systems for Monitoring Energy Use and Occupancy  
 in Existing Homes  
 SO SUSTAINABILITY IN ENERGY AND BUILDINGS  
 SE Smart Innovation Systems and Technologies  
 LA English  
 DT Proceedings Paper  
 CT 2nd International Conference on Sustainability in Energy and Buildings  
 (SEB 2010)  
 CY MAY 06-07, 2010  
 CL Brighton, ENGLAND  
 DE Energy Efficient Dwellings; Post-occupancy Evaluation (POE); Occupants  
 Behaviour; Building Performance
- AB In the UK the existing domestic building stock accounts for 30 % of the total carbon dioxide emissions [Domestic energy fact file, BRE, 2008]. The UK Government has set ambitious targets for reducing UK carbon dioxide emissions by 80% by 2050. These targets will require significant changes to the existing buildings. To understand and quantify the benefits of refurbishment solutions, it is vital to monitor exemplar buildings and to bring them to an energy efficiency standard with lower associated carbon emissions, by finding the most efficient way to refurbish them. A 1930's replica three bed semi-detached house analyzed in this study is located in the University of Nottingham campus and is fully monitored, including monitoring of the occupants patterns, environmental monitoring, electricity use and energy associated with space and hot water heating. This paper analyses techniques used for tracking computing technologies in everyday domestic settings. A Real Time Occupancy Monitoring System using ultra wideband (UW) radio frequency (RF) is used in this study to track person's location within the research house. The results presented in this paper shows that energy consumption profiles are related to the occupants and their profiles. The data also depends on the outside weather conditions and occupants' behaviour. The study shows that it is not enough just to improve building performance in order to improve energy efficiency; it is also important to understand and influence occupant behaviour, due to the fact that in domestic buildings the occupants exert complete control of the appliances, lights, heating, and ventilation. The results of this study suggest that general behavioural trends and patterns can be extracted from long-term collected data. This systematic study could benefit the existing housing stock in the UK by applying the same methods used in the research house.
- C1 [Spataru, Catalina; Gillott, Mark] Univ Nottingham, Inst Sustainable Energy Technol, Dept Architecture & Built Environm, Fac Engr, Nottingham NG7 2RD, England.  
 RP Spataru, C (reprint author), Univ Nottingham, Inst Sustainable Energy Technol, Dept Architecture & Built Environm, Fac Engr, Nottingham NG7 2RD, England.  
 EM Catalina.Spataru@nottingham.ac.uk  
 OI Gillott, Mark/0000-0002-4829-8243  
 CR Aggarwal JK, 1999, COMPUT VIS IMAGE UND, V73, P428, DOI 10.1006/cviu.1998.0744  
 Brumitt B, 2000, IEEE PERS COMMUN, V7, P41, DOI 10.1109/98.878536  
 Cordes JJ, 1990, J BEHAV EC, V19, P273  
 Gillott M, 2010, WOODHEAD PUBL SER EN, P649, DOI 10.1533/9781845699277.3.649  
 Gillott M, 2006, ARCHIT ENG DES MANAG, V2, P273, DOI 10.1080/17452007.2006.9684622  
 Koile K, 2003, LECT NOTES COMPUT SC, V2864, P90

Moore F., 1993, ENV CONTROL SYSTEMS  
 Seligman C, 1977, ENERGBUILDINGS, V1, P325  
 Toftum J, 2009, BUILD ENVIRON, V44, P2009, DOI 10.1016/j.buildenv.2009.02.007  
 [Anonymous], 2008, TREND 963 ENG MAN  
 [Anonymous], 2007, UBISENSE MANUAL

NR 11

TC 1

Z9 1

U1 0

U2 9

PU SPRINGER-VERLAG BERLIN

PI BERLIN

PA HEIDELBERGER PLATZ 3, D-14197 BERLIN, GERMANY

SN 2190-3018

BN 978-3-642-17386-8

J9 SMART INNOV SYST TEC

PY 2011

VL 7

BP 247

EP 256

PG 10

WC Construction & Building Technology; Energy & Fuels; Engineering, Civil

SC Construction & Building Technology; Energy & Fuels; Engineering

GA BBM02

UT WOS:000307329200025

DA 2018-05-03

ER

PT S

AU Taneja, O

AF Taneja, Om

GP ASHRAE

TI Measures for Maintaining Low Energy use in Commercial Buildings over  
 their LifeCycle

SO ASHRAE: TRANSACTIONS 2011, VOL 117, PT 1

SE ASHRAE Transactions

LA English

DT Proceedings Paper

CT Winter Conference of the

American-Society-of-Heating-Refrigerating-and-Air-Conditioning-Engineers  
 (ASHRAE)

CY 2011

CL Las Vegas, NV

SP Amer Soc Heating, Refrigerating & Air-Conditioning Engineers (ASHRAE)

AB The challenge that sustainable buildings movement faces is, "how to maintain the intended sustainable performance with regards to low energy use, indoor comfort and projected operating costs savings over the long term use of the building" Rapid decline in sustainable performance of a few high-profile buildings affects credibility of the High Performance buildings initiatives, reinforces doubts amongst climate-change non-believers and slows down the enthusiasm of the investors. Examining the lifecycle performance and costs, raising the awareness of building owners and tenants, adopting the best operational and maintenance practices by trained and skilled operating staff, and incorporating measurements, verification and automation technologies to automatically track and optimize the performance of all key buildings systems needs to become an essential part of property management culture to avoid pitfalls.

Emergence of Building Energy Labeling Program and Building Information modeling techniques coupled with energy use sub-metering can alert of issues during commissioning, building occupancy, tenant-fit ups, building-use changes or of decline in performance due to poor operations and maintenance management. Building Heating, Ventilation and Air Conditioning systems are significant users of energy as well as their operations and maintenance impacts the health and security of tenants. Therefore, proper

design, configuration, commissioning, operations and maintenance of such systems continues to offer opportunities for reducing the emission of greenhouse gases, and any lapses in monitoring and correcting deficiencies creates shortfall in sustainable performance over the life of a building. As the largest single landlord in the United States, the Federal Government oversees about 500,000 federal buildings. With additional resources being made available under the Recovery Act funding, new tools are emerging to allow monitoring and control of energy use.

This paper outlines various qualitative and quantitative measures that can be practiced to improve and sustain performance of all building systems and infrastructure elements. Amongst all the measures, having trained and motivated operations and maintenance staff involved from concepts stage through design, construction, commissioning, and operations not only facilitates meeting the original design intent, but also allows to make adaptive changes with changes in occupancy, functionality, codes, standards or security requirements. Such general practices can assure sustenance of energy and environmental performance over the life cycle of systems and buildings. This paper also emphasizes how industry professional and trade organizations can guide towards standards and guidelines that can be more easily assimilated by the operations and maintenance staff and can help modify human behavior towards not only designing, but maintaining a more socially and environmentally responsible built-environment.

C1 US Gen Serv Adm, Manhattan Serv Ctr, New York, NY USA.

RP Taneja, O (reprint author), US Gen Serv Adm, Manhattan Serv Ctr, Reg 2, New York, NY USA.

CR ASHRAE, EN EFF GUID EX COMM

ASHRAE, 2010, PERF MEAS PROT COMM

\*CA EN COMM, 2000, EN ACC KEY TOOL MAN

\*EPA, EPA EN STAR PORTF MA

\*INT AG MEM UND, 2006, FED LEAD HIGH PERF B

International Energy Agency, 2010, WORLD EN OUTL

International Energy Agency, 2008, WORLD EN OUTL

JARNAGIN RE, 2009, ASHRAE J DEC, P18

Johnson Martha, 2010, WHITE HOUSE CLEAN EN

JOHNSON M, 2010, COMMUNICATION 0602

NALL PED, 2009, ASHRAE J DEC, P20

Portland Energy Conservation Inc. (PECI), 1999, OP MAINT ASS

Singh A., 2009, LIFE CYCLE COST ANAL

Taneja Om, INT C IMPR EN EFF CO

UNEP, 2007, BUILD CLIM CHANG STA

\*US DEP HOUS URB D, LIF CYCL ASS TOOLS M

\*US DOE, FED EN MAN PROGR FEM

VICKROY R, 2010, BUILDING OPERATI MAY, P25

\*WORLD RESOURCES I, CLIMATE ENERGY TRANS

[Anonymous], 2006, BUILDING DESIGN NOV

NR 20

TC 1

Z9 1

U1 0

U2 3

PU AMER SOC HEATING, REFRIGERATING AND AIR-CONDITIONING ENGS

PI ATLANTA

PA 1791 TULLIE CIRCLE NE, ATLANTA, GA 30329 USA

SN 0001-2505

J9 ASHRAE TRAN

PY 2011

VL 117

BP 525

EP 532

PN 1

PG 8

WC Thermodynamics

SC Thermodynamics

GA BXF18

UT WOS:000295933900065

DA 2018-05-03  
ER

PT 5

AU Choi, KS

Ahn, YK

Park, YC

Park, WC

Seo, HM

Jung, KM

Seo, KH

AF Choi, Kwang-Soon

Ahn, Yang-Keun

Park, Young-Choong

Park, Woo-Chool

Seo, Hae-Moon

Jung, Kwang-Mo

Seo, Kyeung-Hak

GP IEEE

TI Architectural Design of Home Energy Saving System based on Realtime  
Energy-Awareness

SO PROCEEDINGS OF THE 4TH INTERNATIONAL CONFERENCE ON UBIQUITOUS  
INFORMATION TECHNOLOGIES & APPLICATIONS (ICUT 2009)

SE Proceedings of the International Conference on Ubiquitous Information  
Technologies & Applications

LA English

DT Proceedings Paper

CT 4th International Conference on Ubiquitous Information Technologies

CY DEC 20-22, 2009

CL Fukuoka, JAPAN

SP IEEE

ID MANAGEMENT

AB Recently, a global market related to energy efficiency and energy saving technologies is being extended rapidly with the growth of a matter of primary concern about extreme climate change. Especially, in the home network environments where only its functional aspects have been focused on without considering energy consumption, it is urgent to develop new energy-efficient technologies specialized in the home network environments.

In this paper, architecture of home energy saving system (HESS) based on energy-awareness and its basic functional requirements are designed and proposed for real-time home energy monitoring service, reducing or cutting off standby power caused by home appliances, and intelligent home energy management service.

EM lenon@keti.re.kr; ykahn@keti.re.kr; ycpark@keti.re.kr;  
wcpark@keti.re.kr; bmoons@keti.re.kr; jungkm@keti.re.kr;  
paul\_kseol@keti.re.kr

CR Inoue M, 2003, IEEE T CONSUM ELECTR, V49, P606, DOI 10.1109/TCE.2003.1233782

Jeong YK, 2008, IEEE T CONSUM ELECTR, V54, P487, DOI 10.1109/TCE.2008.4560119

\*MOCIE KEMCO, 2003, KOR 1 WATT PLAN STAN

PARK WK, 2008, INT C ADV EL MICR OC, P121

Williams E, 2006, IEEE INT SYMP ELECTR, P167, DOI 10.1109/ISEE.2006.1650055

NR 5

TC 1

Z9 1

U1 0

U2 0

PU IEEE

PI NEW YORK

PA 345 E 47TH ST, NEW YORK, NY 10017 USA

SN 1976-0035

BN 978-1-4244-5131-9  
 J9 P INT C UBIQ INFORM  
 PY 2009  
 BP 5  
 EP 9  
 PG 5  
 WC Computer Science, Theory & Methods; Engineering, Electrical & Electronic  
 SC Computer Science; Engineering  
 GA BRS47  
 UT WOS:000283532900002  
 DA 2018-05-03  
 ER

PT S  
 AU Sun, JY  
     Yin, B  
     Feng, JH  
     Zhan, SL  
     Jin, ZY  
 AF Sun Jin-ying  
     Yin Bo  
     Feng Jian-hua  
     Zhan Song-lin  
     Jin Zhan-yong  
 BE Lan, H  
 TI Policy Analysis and Mode Design on Incremental Investment and Financing  
     of Building Energy Efficient Market in China  
 SO 2009 INTERNATIONAL CONFERENCE ON MANAGEMENT SCIENCE & ENGINEERING  
     (16TH), VOLS I AND II, CONFERENCE PROCEEDINGS  
 SE International Conference on Management Science and Engineering-Annual  
     Conference Proceedings  
 LA English  
 DT Proceedings Paper  
 CT 16th International Conference on Management Science and Engineering  
 CY SEP 14-16, 2009  
 CL Moscow, RUSSIA  
 SP Natl Nat Sci Fdn China, Harbin Inst Technol, State Univ Management, IEEE Technol Management Council  
 DE incremental investment and financing; building energy efficient market;  
     policy; mode design  
 ID ENVIRONMENT  
 AB Development barriers of building energy efficient market (BEEM) in China mainly centralize on unitary  
     construction capital source channel and deficient effective capital supply. To the key problems of capital  
     financing in BEEM, this study takes the incremental investment and financing (IIF) as research object.  
     Establish two-stage leader-followers game model based on Stackelberg with government and other  
     investors during the course of IIF for BEEM, and prove that government's participant degree and mode  
     have important influence on market investment efficiency and proposed policy path improving IIF  
     influence factors. Propose three types of policy path including CAC, MBI and market standardization  
     policy type (MSP). On the basis of research result, propose three IIF modes suit for this stage in China,  
     which include IIF mode combining market admittance and energy efficient label, IIF mode based on  
     existing residential building energy efficient retrofit mode and IIF mode under energy efficient supervision  
     framework.

C1 [Sun Jin-ying; Zhan Song-lin] China Bldg Design Consultants Cooperat, China Architecture Design & Res  
     Grp, Bldg Energy Engn Ctr, Beijing 100044, Peoples R China.  
     [Yin Bo] China Acad Bldg Res, Beijing 100013, Peoples R China.  
     [Feng Jian-hua] Harbin Inst Technol, Sch Civil Engn, Harbin 150090, Peoples R China.  
     [Jin Zhan-yong] Harbin Inst Technol, Sch Management, Harbin 150001, Peoples R China.

RP Sun, JY (reprint author), China Bldg Design Consultants Cooperat, China Architecture Design & Res Grp,  
     Bldg Energy Engn Ctr, Beijing 100044, Peoples R China.

CR Banerjee A, 2003, ENER POLICY, V31, P109, DOI 10.1016/S0301-4215(02)00012-5  
 Bertoldi P, 2006, ENER POLICY, V34, P1818, DOI 10.1016/j.enpol.2005.01.010  
 BIALAS WF, 1989, P 28 IEEE C DEC CONT, P12  
 CAO ZD, 2001, J DONGHUA U, P23  
 [??? Chang Liangfeng], 2002, [??????, Chinese journal of management science], V10, P48  
 CUI XM, 2006, CONSTRUCTION TECHNOL, P94  
 Friedland AJ, 2003, ENVIRON SCI POLICY, V6, P175, DOI 10.1016/S1462-9011(03)00006-6  
 Gerchak Y, 1999, IIE TRANS, V31, P827, DOI 10.1080/07408179908969884  
 HOWARTH RB, 1995, CONTEMP ECON POLICY, V13, P101, DOI 10.1111/j.1465-7287.1995.tb00726.x  
 HUBER RM, 1998, WORLD BANK PUBLICATI, P23  
 JIN MH, 2005, CHINA ENERGY, P3440  
 Langniss O, 2006, ENER POLICY, V34, P200, DOI 10.1016/j.enpol.2004.08.025  
 LIANG JL, 2007, EURASIP J ADV SIG PR, P1  
 LV ZY, 2004, QUANTITY EC TECHNIQU, P104  
 MAHLIA TMI, 2004, ENERGY CONVERSION MA, P1785  
 MYERSON RB, 1997, GAME THEORY ANAL CON, P23  
 Pang J.-S., 2005, COMPUTATIONAL MANAGE, V2, P21, DOI DOI 10.1007/S10287-004-0010-0  
 PAPA VASSILOPOULOS GP, 1981, SIAM J CONTROL OPTIM, V19, P651, DOI 10.1137/0319041  
 PORTNEY PR, 2000, RESOURCES FUTURE ENV, V123, P134  
 SAMADDAR S, 2005, EUR J OPER RES, V32, P483  
 Sjodin J, 2002, INT J ENER RES, V26, P475, DOI 10.1002/er.797  
 Vaninsky A, 2006, ENER ECON, V28, P326, DOI 10.1016/j.eneco.2006.02.007  
 Vine E, 2005, ENER POLICY, V33, P691, DOI 10.1016/j.enpol.2003.09.014  
 WANG JW, 2006, GLOBAL SCI EC REV, P51  
 ZHAO ZS, 2007, CONSTRUCTION TECHNOL, P18  
 2005, STUDY THERMAL ENV EN, P379

NR 26

TC 1

Z9 1

U1 0

U2 0

PU IEEE

PI NEW YORK

PA 345 E 47TH ST, NEW YORK, NY 10017 USA

SN 2155-1847

BN 978-1-4244-3970-6

J9 INT C MANAGE SCI ENG

PY 2009

BP 1913

EP +

DI 10.1109/ICMSE.2009.5317744

PG 3

WC Computer Science, Information Systems; Computer Science,  
 Interdisciplinary Applications; Engineering, Industrial; Operations  
 Research & Management Science

SC Computer Science; Engineering; Operations Research & Management Science

GA BMY95

UT WOS:000273956800285

DA 2018-05-03

ER

PT S

AU Baverstock, G

Harries, D

Jennings, P

Parker, I

AF Baverstock, Garry

Harries, David



Jennings, Philip  
 Parker, Ian  
 BE Jennings, P  
 Ho, G  
 Mathew, K  
 Nayar, CV

TI A case for establishing a nationally based program for sustainable energy and water use in the Built Environment: An investigation into: Establishing a vibrant R, D & D Collaborative Centre for Energy Efficient Lifestyles, Developmental Patterns, Building Technologies and Building Design Strategies

SO Renewable Energy for Sustainable Development in the Asia Pacific Region

SE AIP CONFERENCE PROCEEDINGS

LA English

DT Proceedings Paper

CT International Conference on Renewable Energy for Sustainable Development in the Asia Pacific Region

CY FEB 04-08, 2007

CL Fremantle, AUSTRALIA

SP World Renewable Energy Network, Res Inst Sustainable Energy, Int Org Biotechnol & Bioengn, Western Australian Sustainable Energy Assoc, AusAID, Sustainable Energy Dec Off, Dept Environm & Heritage Australian greenhouse Off, Dept Planning & Infrastruct, Synergy, Solar e com

AB For the past decade, politicians have applied different shades of "green-wash" to global environmental issues in order to help juggle their positions in the political spectrum. This has created the illusion that effective measures are being pursued in the public interest for both this and future generation(s). The reality is, however, that nearly of all these initiatives are "input focused" and the various States of the Environment reports confirm that, despite decades of endeavour and large financial investment, there is little return on investment and that the rate of environmental degradation, particularly of the global atmosphere, continues to increase. Despite fierce posturing from the global warming sceptics, it seems that finally, the long term data indices of global warming are being accepted seriously and politicians around the world are responding by investing public funds in the quest for the search for options. This paper contends that with global warming, humans will need to embrace uncertainty and manage change and that innovation and cooperation across all disciplines and the cooperation of the entire political and social spectrum will be required to solve the ecological disasters that have already begun to unfold and accelerate in frequency. It looks from a strategic viewpoint at how specialist education can catalyse change and play an important role in managing the change. The case study used in this analysis is the RISE Master of Science Course in Environmental Architecture. It explores the implications of linking to converging interests from other emerging course streams for Engineering and other Built Environment disciplines such as Planning, Project Management and Interior design as well as socio-economic disciplines and the integrative discipline of Systems Dynamics.

C1 Murdoch Univ, Murdoch, WA 6150, Australia.

CR BALLINGER J, 1982, THERMAL PERFORMANCE  
 BAVERSTOCK GF, 1986, LOW ENERGY BUILDINGS, V1  
 BAVERSTOCK GF, 1993, THESIS CUTIN U TECHN  
 \*BDP, 1998, ENV DES GUID, V1  
 JONGJIN K, 1998, INTRO SUSTAINABLE DE  
 Lovins A., 1999, NATURAL CAPITALISM  
 PROF PN, 2003, SUSTAINABILITY HOPE

NR 7  
 TC 1  
 Z9 1  
 U1 0  
 U2 3

PU AMER INST PHYSICS  
 PI MELVILLE  
 PA 2 HUNTINGTON QUADRANGLE, STE 1NO1, MELVILLE, NY 11747-4501 USA  
 SN 0094-243X  
 BN 978-0-7354-0454-0

J9 AIP CONF PROC

PY 2007

VL 941

BP 154

EP 163

PG 10

WC Energy & Fuels; Environmental Sciences; Environmental Studies; Physics,  
Applied

SC Energy & Fuels; Environmental Sciences & Ecology; Physics

GA BGV33

UT WOS:000250778900017

OA green\_published

DA 2018-05-03

ER

PT B

AU Habara, H

Narumi, D

Shimoda, Y

Mizuno, M

AF Habara, H

Narumi, D

Shimoda, Y

Mizuno, M

BE Yang, X

Zhao, B

Zhao, R

TI An occupant indoor thermal environment control behavior model to  
estimate residential cooling energy consumption

SO INDOOR AIR 2005: PROCEEDINGS OF THE 10TH INTERNATIONAL CONFERENCE ON  
INDOOR AIR QUALITY AND CLIMATE, VOLS 1-5

LA English

DT Proceedings Paper

CT 10th International Conference on Indoor Air Quality and Climate (Indoor  
Air 2005)

CY SEP 04-09, 2005

CL Beijing, PEOPLES R CHINA

SP Tsinghua Univ, Minist Educ China, Natl Nat Sci Fdn China, Beijing Municipal Commiss Sci & Technol,  
Shanghai Municipal Commiss Sci & Technol, US EPA, Amer Ind Hyg Assoc, Amer Soc Heating,  
Refrigerating & Air Conditioning Engineers, Int Commiss Occupat Hlth, SC Indoor Air Qual & Hlth, Int  
Council Res & Innovat Bldg & Construct, European Commiss Asia Pro Eco Programme Promot  
Sustainable Solut Environm Europe & Asia, Korean Soc Indoor Environm, Soc Indoor Environm

DE control behavior; cross ventilation; air conditioner; energy  
consumption; residential house

AB Recently, some studies attempt to modelize control behavior for architectural heat transfer simulation.

However, few of these studies consider cross ventilation. In this paper, we devised a control behavior model including cross ventilation. First, we performed surveys to study the relationship between indoor temperature and air conditioner On control. Then, the control behavior model applying the transition probability of air conditioner Off-to-On state based on the survey results was devised. Moreover, it was incorporated into the model we proposed before to estimate air conditioning energy consumption considering cross ventilation. Finally, the simulation results with our method were compared to those with the typical method. Consequently, our method estimated air conditioner operation time by about 20% less and cooling energy consumption by about 5% less compared to the typical method. This suggested that the typical method could overestimate air conditioner operation time and cooling energy consumption.

C1 Osaka Univ, Dept Environm Engn, Suita, Osaka 5650871, Japan.

RP Habara, H (reprint author), Osaka Univ, Dept Environm Engn, 2-2 Yamadaoka, Suita, Osaka 5650871,  
Japan.

EM habara@ees.env.eng.osaka-u.ac.jp

CR FRITSCH R, 1990, BUILD ENVIRON, V25, P173, DOI 10.1016/0360-1323(90)90030-U

Gagge A. P., 1976, ASHRAE T, V82, P234

HABARA H, 2003, 582 AIJ, P107

ISHIDA K, 1996, SHASE S

Lechner N., 1991, HEATING COOLING LIGH

TANIMOTO J, 1998, T SHASE, P37

UDAGAWA M, 1985, 15 HEAT TRANS S, P22

NR 7

TC 1

Z9 1

U1 0

U2 1

PU TSINGHUA UNIVERSITY PRESS

PI BEIJING

PA TSINGHUA UNIVERSITY HAIDIANQU, BEIJING 100084, PEOPLES R CHINA

BN 978-7-89494-830-4

PY 2005

BP 1179

EP 1183

PG 5

WC Construction & Building Technology; Engineering, Environmental; Public, Environmental & Occupational Health

SC Construction & Building Technology; Engineering; Public, Environmental & Occupational Health

GA BDJ55

UT WOS:000233831201094

DA 2018-05-03

ER

PT J

AU Jaffar, B

Oreszczyn, T

Raslan, R

Summerfield, A

AF Jaffar, Badria

Oreszczyn, Tadj

Raslan, Rokia

Summerfield, Alex

TI Understanding energy demand in Kuwaiti villas: Findings from a quantitative household survey

SO ENERGY AND BUILDINGS

LA English

DT Article

DE Household survey; Residential energy demand; Kuwait; Energy efficiency policy

ID BUILDING CHARACTERISTICS; OCCUPANTS BEHAVIOR; RESIDENTIAL SECTOR; CONSUMER-BEHAVIOR; CONSUMPTION; SPACE; ELECTRICITY; DETERMINANTS; EFFICIENT; PATTERNS

AB Residential buildings in Kuwait account for almost 60% of the country's national electrical power generated, considerably greater than all other sectors or building types. This paper identifies key drivers of energy use in Kuwaiti villas based on a survey of 250 households undertaken throughout the six districts of Kuwait. The survey consists of a cross-sectional interviewer-administered questionnaire designed to gather detailed information about building physical characteristics, occupants' socio-demographic background and energy-use behaviours. Survey data is analysed using both statistical descriptive methods and multiple linear regression analysis to identify key determinants of energy consumption in a sample of Kuwaiti villas. Analysis indicates that an occupant driven cooling behaviour (air-conditioning thermostat temperature set points) is the major driver of energy use, followed by the number of rooms and the number of occupants. Together, such drivers significantly explain 32% of the variability in energy

consumption Survey findings provide descriptive information about Kuwaiti households and insights into the key drivers of energy use to better inform further research and policy interventions in this field. (C)

2018 Elsevier B.V. All rights reserved.

C1 [Jaffar, Badria; Oreszczyn, Tadj; Raslan, Rokia; Summerfield, Alex] UCL Energy Inst, 14 Upper Woburn Pl, London WC1H 0NN, England.

RP Jaffar, B (reprint author), UCL Energy Inst, 14 Upper Woburn Pl, London WC1H 0NN, England.

EM b.jaffar@ucl.ac.uk

FU Research Councils UK [EP/K011839/1]

FX This study was undertaken as part of a PhD research at the UCL Energy

Institute. Oreszczyn is Director of the RCUK Centre for Energy

Epidemiology at UCL and funded by Research Councils UK (EP/K011839/1).

The authors are grateful to all the participants in the household survey

and to the interview personnel for their generous assistance in the data

collection process. The authors are also grateful to the Kuwait Ministry

of Electricity and Water for their data and information support.

CR Abrahamse W, 2009, J ECON PSYCHOL, V30, P711, DOI 10.1016/j.joep.2009.05.006

Al-Mumin A, 2003, ENER BUILDINGS, V35, P549, DOI 10.1016/S0378-7788(02)00167-6

Alotaibi S, 2011, ENER POLICY, V39, P637, DOI 10.1016/j.enpol.2010.10.036

Alshalfan S, 2013, RIGHT HOUSING KUWAIT

Biesiot W, 1999, ECOL ECON, V28, P367, DOI 10.1016/S0921-8009(98)00113-X

Brandon G, 1999, J ENVIRON PSYCHOL, V19, P75, DOI 10.1006/jevp.1998.0105

[Anonymous], 2013, 11 BRE DEP EN CLIM C

Chiu LF, 2014, BUILD RES INF, V42, P574, DOI 10.1080/09613218.2014.912539

Department of Energy and Climate Change (DECC), 2013, NAT EN EFF DAT FRAM

Department of Energy and Climate Change (DECC), 2014, EN CONS UK 2014

Druckman A, 2008, ENER POLICY, V36, P3177, DOI 10.1016/j.enpol.2008.03.021

Gatersleben B, 2002, ENVIRON BEHAV, V34, P335, DOI 10.1177/0013916502034003004

Haas R, 1998, ENER BUILDINGS, V27, P195, DOI 10.1016/S0378-7788(97)00034-0

Hertog S., 2009, ENERGY SUSTAINABILIT

Howden-Chapman P, 2009, ENER POLICY, V37, P3387, DOI 10.1016/j.enpol.2008.12.023

Huebner GM, 2015, APPL ENER, V159, P589, DOI 10.1016/j.apenergy.2015.09.028

IBM, 2013, SPSS STAT WIND VERS

Kavousian A, 2013, ENERGY, V55, P184, DOI 10.1016/j.energy.2013.03.086

Kelly S, 2011, ENERGY, V36, P5610, DOI 10.1016/j.energy.2011.07.009

Krane J., 2013, 1302 U CAMBR CAMBR W, V1304

Kuwait Central Administration for Statistics, 2013, INC EXP STAT REP

Kuwait Metrological Center, 2018, CLIMATE DATA

Lahn G., 2013, SAVING OIL GAS GULF

Leth-Petersen S, 2001, ENER ECON, V23, P387, DOI 10.1016/S0140-9883(00)00078-5

Liao HC, 2002, ENER ECON, V24, P267, DOI 10.1016/S0140-9883(02)00014-2

Linden AL, 2006, ENER POLICY, V34, P1918, DOI 10.1016/j.enpol.2005.01.015

Kevin Lomas K., CARBON REDUCTION BUI

Maheshwari G P, 2009, International Journal of Energy Technology and Policy, V7, P95, DOI

10.1504/IJETP.2009.023213

Ministry of Electricity and Water (MEW), 2014, RES SECT EN CONS 200

Ministry of Electricity and Water (MEW), 2014, EN CONS PROGR COD PR

Ministry of Electricity and Water (MEW), 2012, STAT DAT BOOK 2012 E

Oxford Business Group, 2015, THE REP KUW

Public Authority for Civil Information (PACI), 2013, HOUS BUILD STAT

Papakostas KT, 1997, ENER BUILDINGS, V26, P207, DOI 10.1016/S0378-7788(97)00002-9

Santin OG, 2009, ENER BUILDINGS, V41, P1223, DOI 10.1016/j.enbuild.2009.07.002

Shipworth D., 2005, P 7 EUR COUNC EN EFF

Smithson M., 2003, CONFIDENCE INTERVALS

Stemers K, 2009, BUILD RES INF, V37, P625, DOI 10.1080/09613210903186661

Sweetman T., RESIDENTIAL ENERGY U

Theodoridou I, 2011, ENER BUILDINGS, V43, P2422, DOI 10.1016/j.enbuild.2011.05.034

U. S. Department of Energy Energy Information Administration Residential Energy Consumption Survey,

2009, RES EN CONS SURV HOU

Wood M, 2014, ENER POLICY, V66, P144, DOI 10.1016/j.enpol.2013.10.061

Yohanis YG, 2008, ENER BUILDINGS, V40, P1053, DOI 10.1016/j.enbuild.2007.09.001

NR 43

TC 0

Z9 0

U1 0

U2 0

PU ELSEVIER SCIENCE SA

PI LAUSANNE

PA PO BOX 564, 1001 LAUSANNE, SWITZERLAND

SN 0378-7788

EI 1872-6178

J9 ENER BUILDINGS

J1 Energy Build.

PD APR 15

PY 2018

VL 165

BP 379

EP 389

DI 10.1016/j.enbuild.2018.01.055

PG 11

WC Construction & Building Technology; Energy & Fuels; Engineering, Civil

SC Construction & Building Technology; Energy & Fuels; Engineering

GA GA7CC

UT WOS:000428491200034

DA 2018-05-03

ER

PT J

AU Koezjakov, A

Urge-Vorsatz, D

Crijns-Graus, W

van den Broek, M

AF Koezjakov, A.

Urge-Vorsatz, D.

Crijns-Graus, W.

van den Broek, M.

TI The relationship between operational energy demand and embodied energy

in Dutch residential buildings

SO ENERGY AND BUILDINGS

LA English

DT Article

ID LIFE-CYCLE ENERGY; PARAMETERS; MELBOURNE; STOCKS

AB Reducing heat demand of buildings, due to legal and technological advances in the EU, shifts the ratio of operational vs. embodied energy towards an increasing share of the latter. This leads to a shifting focus on building materials (embodied) energy use. In this study the relationship between heat demand and embodied energy use was investigated, using Dutch residential buildings as a case study. The analysis was performed using the 3SCEP HEB (Center for Climate Change and Sustainable Energy Policy High Efficiency Buildings) model and a constructed Embodied Energy Database Management System (EEDMS), containing embodied energy use of materials most common in Dutch residential construction. The resulting embodied energy use in Dutch dwelling archetypes varies from 52 to 106 MJ/(m<sup>2</sup>.a), annualised over building lifetimes and 3.0 to 6.4 GJ/m<sup>2</sup> in total. These values are for the building construction and exclude recurrent embodied energy and technical installations. For operational energy use the range is 124 to 682 MJ/(m<sup>2</sup>.a). A total energy use reduction of 36% can be reached in 2050 through 46% reduction in operational energy use and 35% increase in embodied energy use, compared to 2015. This research confirms that the relative importance of embodied energy use is increasing: the embodied energy use in standard homes is about 10-12% of the total energy use, while it is 36-46% in energy efficient homes. Particularly in light of the goal to reach a maximum global temperature increase of well below 2 degrees C

by 2100, it is important to include embodied energy use in future policy objectives. (C) 2018 The Authors. Published by Elsevier B.V.

- C1 [Koezjakov, A.; Crijns-Graus, W.; van den Broek, M.] Univ Utrecht, Copernicus Inst Sustainable Dev, Heidelberglaan 2, NL-3584 CS Utrecht, Netherlands.  
[Urge-Vorsatz, D.] Cent European Univ, Ctr Climate Change & Sustainable Energy Policy, Nador Utca 9, Budapest, Hungary.
- RP Crijns-Graus, W (reprint author), Univ Utrecht, Copernicus Inst Sustainable Dev, Heidelberglaan 2, NL-3584 CS Utrecht, Netherlands.  
EM w.h.j.graus@uu.nl
- CR Adalberth K., 1997, ENERGY USE LIFE CYCL  
Agentschap NL, 2011, BESTAANDE BOUW  
Bansal D, 2014, ENER G BUILDINGS, V69, P260, DOI 10.1016/j.enbuild.2013.11.006  
Berghuis M., 2016, HELPDESK BOUWBESLUIT  
Bijleveld M. M., 2010, METEN IS WETEN NEDER  
Blengini GA, 2010, ENER G BUILDINGS, V42, P869, DOI 10.1016/j.enbuild.2009.12.009  
Blok K., 2009, ENERGY ANAL, P28  
Buchanan A. H., 1993, IPENZ ANN C 1993 P S, P354  
CBS, 2016, VIER TIEN HUI SH WON  
Chastas P, 2016, BUILD ENVIRON, V105, P267, DOI 10.1016/j.buildenv.2016.05.040  
Chen TY, 2001, ENERGY, V26, P323, DOI 10.1016/S0360-5442(01)00006-8  
Crawford R. H., 2013, P INT C CONSTR BUILD, P473  
Crawford RH, 2008, J ENVIRON MANAGE, V88, P496, DOI 10.1016/j.jenvman.2007.03.024  
Crowther P., 1999, P PASS LOW EN ARCH M  
Dixit MK, 2017, RENEW SUST ENER G REV, V79, P390, DOI 10.1016/j.rser.2017.05.051  
Dixit MK, 2010, ENER G BUILDINGS, V42, P1238, DOI 10.1016/j.enbuild.2010.02.016  
RVO, 2015, REF EPC 0 4 HOEKW  
RVO, 2015, REF EPC 0 4 VRIJST W  
RVO, 2015, REF EPC 0 4 APP  
RVO, 2015, REF EPC 0 4 TWEE OND  
RVO, 2015, REF EPC 0 4 TUSS  
Institut Wohnen and Umwelt GmbH, 2016, SECT BUILD TYP PRINC  
[Anonymous], 2011, CIRCULAR ECOLOGY EMB  
International Energy Agency, 2016, EV EMB EN CO2EQ BUIL  
IPCC, 2014, CLIM CHANG 2014 MIT  
IRU, 2009, WIST CIJF GEG WEGV E  
Langston YL, 2008, CONSTR MANAG ECON, V26, P147, DOI 10.1080/01446190701716564  
Liebregts M., 2011, TECHNISCHE EIGENSCHA  
Lutzkendorf T, 2015, BUILD RES INF, V43, P62, DOI 10.1080/09613218.2014.935575  
Majeau-Bettez G, 2011, ENVIRON SCI TECHNOL, V45, P10170, DOI 10.1021/es201308x  
Meijer F, 2009, BUILD RES INF, V37, P533, DOI 10.1080/09613210903189376  
Monteiro H, 2016, SUSTAIN CITIES SOC, V26, P507, DOI 10.1016/j.scs.2016.06.002  
Rauf A, 2013, ARCHIT SCI REV, V56, P252, DOI 10.1080/00038628.2013.810548  
RDW, 2012, OV MAT GEW NED  
Reddy BVV, 2003, ENER G BUILDINGS, V35, P129  
Ritzen MJ, 2016, BUILD ENVIRON, V108, P73, DOI 10.1016/j.buildenv.2016.07.020  
Rovers R, 2015, BUILDINGS, V5, P1, DOI 10.3390/buildings5010001  
RVO, 2016, EN EPC  
Sartori I, 2007, ENER G BUILDINGS, V39, P249, DOI 10.1016/j.enbuild.2006.07.001  
SBRCURnet, 2015, PASS WON  
SBRCURnet, 2017, SBR REF DET ONL  
SEV, 2004, BOUW MET TIJD PRAKT  
Sorrell S., 2007, REBOUND EFFECT ASSES  
Stephan A., 2013, THESIS  
Stephan A, 2017, BUILD ENVIRON, V114, P187, DOI 10.1016/j.buildenv.2016.11.043  
Stephan A, 2013, BUILD ENVIRON, V68, P35, DOI 10.1016/j.buildenv.2013.06.003  
Stephan A, 2012, ENER G BUILDINGS, V55, P592, DOI 10.1016/j.enbuild.2012.09.008  
Suh S, 2004, ENVIRON SCI TECHNOL, V38, P657, DOI 10.1021/es0263745  
Sunikka M., 2017, HOUS URBAN POLICY ST, V19

Takano A, 2015, ENER G BUILDINGS, V105, P154, DOI 10.1016/j.enbuild.2015.07.060  
 Timmermans M., 2014, RENOVATIE BUITENGEVE  
 Treloar G.J., 2000, CONSTRUCTION MANAGEM, V18, P5, DOI DOI 10.1080/014461900370898  
 Treloar G., 1997, ECON SYST RES, V9, P375, DOI DOI 10.1080/09535319700000032  
 Trusty W., 2005, BUILD DES CONSTR, V5, P12  
 TU Delft, 2015, TAB WEBTOOL  
 Urge-Vorsatz D, 2013, CURR OPIN ENV SUST, V5, P141, DOI 10.1016/j.cosust.2013.05.004  
 Urge-Vorsatz D., 2012, BEST PRACTICE POLICI  
 van Ommeren E. Backer, 2011, GLOBALE SCHETS GASOL  
 [Anonymous], 2017, ROTTERDAM MUNICIPALI  
 [Anonymous], 2016, CIRCULAR ECOLOGY GLO

NR 60

TC 0

Z9 0

U1 1

U2 1

PU ELSEVIER SCIENCE SA

PI LAUSANNE

PA PO BOX 564, 1001 LAUSANNE, SWITZERLAND

SN 0378-7788

EI 1872-6178

J9 ENER G BUILDINGS

JI Energy Build.

PD APR 15

PY 2018

VL 165

BP 233

EP 245

DI 10.1016/j.enbuild.2018.01.036

PG 13

WC Construction &amp; Building Technology; Energy &amp; Fuels; Engineering, Civil

SC Construction &amp; Building Technology; Energy &amp; Fuels; Engineering

GA GA7CC

UT WOS:000428491200021

OA gold

DA 2018-05-03

ER

PT J

AU Liu, YQ

AF Liu, Yingqi

TI Role of a forward-capacity market to promote electricity use reduction  
 in the residential sector-a case study of the potential of social  
 housing participation in the Electricity Demand Reduction Pilot in the  
 UK

SO ENERGY EFFICIENCY

LA English

DT Article

DE Electricity use reduction; Peak demand; Capacity market; Residential;  
 Social housing

ID ENERGY-EFFICIENT APPLIANCES; ISO NEW-ENGLAND; DISCOUNT RATES; POLICY;  
 CONSERVATION; PERFORMANCE; EXPERIENCE; RESOURCE; BARRIERS; PROGRAMS

AB The residential sector is key for electricity demand in many developed economies. Reducing electricity use in households is valuable for carbon mitigation and capacity adequacy and addressing fuel poverty. In many liberalised systems, a forward-capacity market is established to remunerate resources' capacity value, with some allowing electricity use reduction to participate. This paper focuses on the Electricity Demand Reduction Pilot in the UK that trials a novel approach of incentivising electric efficiency via the Great Britain capacity market. Using a case study of social housing, it identifies barriers faced by the

residential sector to utilise funding from the pilot. While opportunities exist for electricity use reduction in lighting, appliances and heating, financial incentives based on the impact on system peak demand are unlikely to be attractive and disadvantage insulation and efficient heating system. Limited budget for electric efficiency project and inflexible requirement of over 2-year payback of Electricity Demand Reduction (EDR) Pilot pose the challenge of funding projects, especially for small organisations, even if they can deliver capacity value to the electricity system. The obligation to deliver and verify committed peak savings and limited scope for payback present challenges and risks for projects to target potential opportunities within households. For communal electricity use, the minimum savings, cash flow and limited internal capabilities are constraints. Therefore, it is inadequate to rely on a forward-capacity market as a primary vehicle for incentivising electric efficiency investment in the residential sector, highlighting the importance of alternative provisions like supplier obligation and market transformation.

C1 [Liu, Yingqi] Univ Oxford, Environm Change Inst, South Parks Rd, Oxford OX1 3QY, England.

RP Liu, YQ (reprint author), Univ Oxford, Environm Change Inst, South Parks Rd, Oxford OX1 3QY, England.

EM yingqi.liu@ouce.ox.ac.uk

FU China Scholarship Council

FX The author is supported by the China Scholarship Council to undertake

this research. The author would like to thank all participants in this research, Professor Nick Eyre and Dr. Sarah Darby for their valuable comments on this paper and Dr. Gavin Killip and Dr. Marina Topouzi for their help with the design of survey.

CR BEIS, 2016, DIG UK EN STAT DUKES

BEIS, 2016, EN CONS UK

BEIS, 2017, HOUS EN EFF NAT STAT

Bilton M, 2014, IMPACT ENERGY EFFICI

BLUMSTEIN C, 1980, ENERGY, V5, P355, DOI 10.1016/0360-5442(80)90036-5

Boardman B, 2004, ENVIRON SCI POLICY, V7, P165, DOI 10.1016/j.envsci.2004.03.002

Boardman B, 2004, ENER POLICY, V32, P1921, DOI 10.1016/j.enpol.2004.03.021

Boardman B, 2014, CARBON MANAG, V5, P361

Boardman B, 2012, ENER POLICY, V49, P143, DOI 10.1016/j.enpol.2012.02.035

Brattle Group and Sustainability First 2012, 2012, GB EL DEM 2010 2025

Caird S, 2012, ENER EFFIC, V5, P283, DOI 10.1007/s12053-012-9146-x

Capon C, 2004, UNDERSTANDING ORG CO

CEBON PB, 1992, ENER POLICY, V20, P802, DOI 10.1016/0301-4215(92)90117-K

CPUC, 2006, CAL EN EFF EV PROT T

Darby S, 2015, SMART METERING EARLY

Darby S, 2010, LIT REV ENERGY DEMAN

Darby S, 2010, BUILD RES INF, V38, P442, DOI 10.1080/09613218.2010.492660

Darby SJ, 2012, ENER POLICY, V49, P759, DOI 10.1016/j.enpol.2012.07.026

DCLG, 2016, ENGL HOUS SURV HEADL

DCLG, 2017, TABL 100 NUMB DWELL

DCLG, 2011, PRIV LANDL SURV 2010

DCLG, 2015, SOC HOUS LETT APR 20

DCLG, 2016, ENGL HOUS SURV 2014

DCLG, 2016, ENGL HOUS SURV EN RE

DECC, 2014, EL DEM RED PIL SCHEM

DECC, 2015, EL DEM RED PIL SCHEM

DECC, 2013, IMP ASS IA EL DEM RE

DECC, 2014, RES UND DECC IPS MOR

DECC, 2016, FIN UK GREENH GAS EM

DECC, 2016, SUCC BIDD EDR PHAS 2

DECC, 2015, SUCC BIDD EDR PIL AU

Doris E, 2009, ENERGY EFFICIENCY PO

du Can SD, 2014, ENER POLICY, V72, P56, DOI 10.1016/j.enpol.2014.04.035

EC, 2016, COMM STAFF WORK DOC

Elsharkawy H, 2015, ENER BUILDINGS, V88, P25, DOI 10.1016/j.enbuild.2014.11.045

Eyre N, 2013, REV TECHNICAL POTENT

Eyre N., 1997, ENERGY ENV, V8, P25



Eyre N, 2015, ENERGY SAVING POLICI  
 Eyre N, 2015, ENER POLICY, V87, P641, DOI 10.1016/j.enpol.2014.12.030  
 FERC, 2009, NAT ASS DEM RESP POT  
 Gaspar R, 2011, ENER POLICY, V39, P7335, DOI 10.1016/j.enpol.2011.08.057  
 GfK, 2016, EN EFF RIS A TEAM DO  
 Golove W. H, 1996, MARKET BARRIERS ENER  
 Gottstein M, 2012, 2012 9 INT C EUR EN, P1  
 Gottstein M, 2010, ROLE FORWARD CAPACIT  
 Green Alliance, 2012, CUTT BRIT EN BILL MA  
 HAUSMAN JA, 1979, BELL J ECON, V10, P33, DOI 10.2307/3003318  
 HCA, 2015, STAT DAT RET SDR 201  
 Hewett M. J, 1998, ACHIEVING ENERGY EFF  
 HIRST E, 1990, RESOUR CONSERV RECY, V3, P267, DOI 10.1016/0921-3449(90)90023-W  
 Hogan Michael, 2017, Electricity Journal, V30, P55, DOI 10.1016/j.tej.2016.12.006  
 HOUSTON DA, 1983, J CONSUM RES, V10, P236, DOI 10.1086/208962  
 IEA, 2017, MARK BAS INSTR EN EF  
 Jenkins C, 2011, ENER EFFIC, V4, P31, DOI 10.1007/s12053-010-9083-5  
 Kelly G, 2012, RENEW SUST ENER REV, V16, P6851, DOI 10.1016/j.rser.2012.08.003  
 Liu Y., 2015, ENVIRON PROG SUSTAIN, P1  
 Liu YQ, 2017, ENER POLICY, V100, P271, DOI 10.1016/j.enpol.2016.10.029  
 MARCH JG, 1978, BELL J ECON, V9, P587, DOI 10.2307/3003600  
 Martinot E, 1998, ENER POLICY, V26, P1071, DOI 10.1016/S0301-4215(98)00052-4  
 Nadel S, 1998, ROLE MARKET TRANSFOR  
 Nadel S, 2015, ENERGY EFFICIENCY US  
 NEEP, 2016, REG EN EFF DAT REED  
 Ofgem, 2015, INSIGHTS PAPER HOUSE  
 Ofgem, 2013, FIN REP CARB EM RED  
 O A., 2013, CIB WORLD BUILD C 20  
 Palmer J, 2013, FURTHER ANAL HOUSEHO  
 Reeves A, 2011, ENER EFFIC, V4, P75, DOI 10.1007/s12053-010-9080-8  
 Rosenberg M, 2009, MARKET EFFECTS MARKE  
 Rosenow J, 2016, ECON ENERGY ENV POL  
 Rosenow J, 2015, ECEEE SUMM STUD P  
 Rosenow J, 2016, ENERGY RES SOC SCI, V21, P141, DOI 10.1016/j.erss.2016.07.005  
 Rosenow J, 2016, BUILD RES INF, V44, P562, DOI 10.1080/09613218.2016.1138803  
 Rosenow J, 2013, P I CIVIL ENG-ENERGY, V166, P127, DOI 10.1680/ener.13.00001  
 Schiellerup P, 2002, ENER POLICY, V30, P327, DOI 10.1016/S0301-4215(01)00099-4  
 Scottish Government, 2016, HOUS STAT SCOTL KEY  
 Scottish Government, 2016, SCOTT HOUS COND SURV  
 Scottish Government, 2015, SCOTT HOUS COND SURV  
 Scottish Housing Regulator, 2017, DIRECTORY SOCIAL LAN  
 Simon H. A, 1966, THEORIES DECISION MA, P1  
 Sorrell S, 2000, UNDERSTANDING BARRIE  
 SPEER, 2013, MOR EFF EL MARK NEW  
 Steg L, 2008, ENER POLICY, V36, P4449, DOI 10.1016/j.enpol.2008.09.027  
 Strbac G, 2008, ENER POLICY, V36, P4419, DOI 10.1016/j.enpol.2008.09.030  
 Thayer D, 2016, 2016 ACEEE SUMMER ST  
 Wade J, 2015, ENERGY EFFICIENCY EV  
 Walton R, 2015, OPWER IS PUSHING BEH  
 Welsh Government, 2016, STAT FOR WAL  
 York D, 2013, FRONTIERS ENERGY EFF

NR 88

TC 0

Z9 0

U1 2

U2 2

PU SPRINGER

PI DORDRECHT

PA VAN GODEWIJCKSTRAAT 30, 3311 GZ DORDRECHT, NETHERLANDS

SN 1570-646X

EI 1570-6478

J9 ENERG EFFIC

J1 Energy Effic.

PD APR

PY 2018

VL 11

IS 4

BP 799

EP 822

DI 10.1007/s12053-017-9607-3

PG 24

WC GREEN & SUSTAINABLE SCIENCE & TECHNOLOGY; Energy & Fuels; Environmental Studies

SC Science & Technology - Other Topics; Energy & Fuels; Environmental Sciences & Ecology

GA GB5OI

UT WOS:000429115100001

DA 2018-05-03

ER

PT J

AU Shen, HZ

Chen, YL

Russell, AG

Hu, YT

Shen, GF

Yu, HF

Henneman, LRF

Ru, MY

Huang, Y

Zhong, QR

Chen, YC

Li, YF

Zou, YF

Zeng, EY

Fan, RF

Tao, S

AF Shen, Huizhong

Chen, Yilin

Russell, Armistead G.

Hu, Yongtao

Shen, Guofeng

Yu, Haofei

Henneman, Lucas R. F.

Ru, Muye

Huang, Ye

Zhong, Qirui

Chen, Yuanchen

Li, Yufei

Zou, Yufei

Zeng, Eddy Y.

Fan, Ruifang

Tao, Shu

TI Impacts of rural worker migration on ambient air quality and health in

China: From the perspective of upgrading residential energy consumption

SO ENVIRONMENT INTERNATIONAL

LA English

DT Article

DE Rural migrant works; Urbanization in China; Ambient air pollution;  
Particulate matter; Human health

ID GLOBAL BURDEN; ANTHROPOGENIC EMISSION; URBAN MIGRATION; POLLUTION;  
MIGRANTS; DISEASE; TRENDS; LABOR; URBANIZATION; SHANGHAI

AB In China, rural migrant workers (RMWs) are employed in urban workplaces but receive minimal resources and welfare. Their residential energy use mix (REM) and pollutant emission profiles are different from those of traditional urban (URs) and rural residents (RRs). Their migration towards urban areas plays an important role in shaping the magnitudes and spatial patterns of pollutant emissions, ambient PM<sub>2.5</sub> (fine particulate matter with a diameter smaller than 2.5  $\mu\text{m}$ ) concentrations, and associated health impacts in both urban and rural areas. Here we evaluate the impacts of RMW migration on REM pollutant emissions, ambient PM<sub>2.5</sub>, and subsequent premature deaths across China. At the national scale, RMW migration benefits ambient air quality because RMWs tend to transition to a cleaner REM upon arrival at urban areas—though not as clean as urban residents'. In 2010, RMW migration led to a decrease of 1.5  $\mu\text{g}/\text{m}^3$  in ambient PM<sub>2.5</sub> exposure concentrations (C-ex) averaged across China and a subsequent decrease of 12,200 (5700 to 16,300, as 90% confidence interval) in premature deaths from exposure to ambient PM<sub>2.5</sub>. Despite the overall health benefit, large-scale cross-province migration increased megacities' PM<sub>2.5</sub> levels by as much as 10  $\mu\text{g}/\text{m}^3$  due to massive RMW inflows. Model simulations show that upgrading within-city RMWs' REMs can effectively offset the RMW-induced PM<sub>2.5</sub> increase in megacities, and that policies that properly navigate migration directions may have potential for balancing the economic growth against ambient air quality deterioration. Our study indicates the urgency of considering air pollution impacts into migration-related policy formation in the context of rapid urbanization in China.

C1 [Shen, Huizhong; Chen, Yilin; Ru, Muye; Huang, Ye; Zhong, Qirui; Chen, Yuanchen; Tao, Shu] Peking Univ, Coll Urban & Environm Sci, Lab Earth Surface Proc, Beijing 100871, Peoples R China.  
[Shen, Huizhong; Chen, Yilin; Russell, Armistead G.; Hu, Yongtao; Henneman, Lucas R. F.] Georgia Inst Technol, Sch Civil & Environm Engr, Atlanta, GA 30332 USA.  
[Shen, Guofeng] US EPA, Res Triangle Pk, NC 27709 USA.  
[Yu, Haofei] Univ Cent Florida, Dept Civil Environm & Construct Engr, Orlando, FL 32816 USA.  
[Huang, Ye] Univ Paris Saclay, Univ Versailles St Quentin, Commissariat Energie Atom & Energies Alternat, CNRS, Lab Sci Climat & Environm, Inst Pierre Simon, F-91191 Gif Sur Yvette, France.  
[Chen, Yuanchen] Zhejiang Univ Technol, Coll Environm, Hangzhou 310014, Zhejiang, Peoples R China.  
[Li, Yufei] Georgia Inst Technol, Sch Publ Policy, Atlanta, GA 30332 USA.  
[Zou, Yufei] Georgia Inst Technol, Earth & Atmospher Sci, Atlanta, GA 30332 USA.  
[Zeng, Eddy Y.] Jinan Univ, Sch Environm, Guangzhou 510632, Guangdong, Peoples R China.  
[Fan, Ruifang] South China Normal Univ, Sch Life Sci, Key Lab Ecol & Environm Sci Guangdong Higher Educ, Guangzhou 510631, Guangdong, Peoples R China.

RP Tao, S (reprint author), Peking Univ, Coll Urban & Environm Sci, Lab Earth Surface Proc, Beijing 100871, Peoples R China.

EM taos@pku.edu.cn

RI SHEN, Guofeng/F-3163-2015

OI SHEN, Guofeng/0000-0002-7731-5399

FU National Natural Science Foundation of China [41390240, 41571130010]; US National Science Foundation [1243535, 1444745]; China Postdoctoral Science Foundation [2015M580914]; 111 Project [B14001]

FX We thank Dr. Philippe Ciais at Laboratoire des Sciences du Climat et de l'Environnement, Dr. Burak Guneralp at Texas A&M University, and Dr. Karen C. Seto at Yale University for their suggestions on the study design. This study is supported by the National Natural Science Foundation of China (grant numbers 41390240 and 41571130010), the US National Science Foundation (grant numbers 1243535 and 1444745), the China Postdoctoral Science Foundation (grant number 2015M580914), and the 111 Project (grant number B14001).

CR Balachandra P, 2011, ENERGY, V36, P5556, DOI 10.1016/j.energy.2011.07.017

Barnes D. F., 1996, ANN REV ENERGY ENV, V21

Bond TC, 2007, GLOBAL BIOGEOCHEM CY, V21, DOI 10.1029/2006GB002840

Burnett RT, 2014, ENVIRON HEALTH PERSP, V122, P397, DOI 10.1289/ehp.1307049

Chan KW, 2010, POPUL DEV REV, V36, P357, DOI 10.1111/j.1728-4457.2010.00333.x

- Chan KW, 1999, CHINA QUART, P818
- Chen YY, 2013, P NATL ACAD SCI USA, V110, P12936, DOI 10.1073/pnas.1300018110
- Cheng YF, 2016, SCI ADV, V2, DOI 10.1126/sciadv.1601530
- China National Environmental Monitoring Center, 2016, CHIN NAT URB AIR QUA
- China.org.cn, 2016, SICH GOV PLEDG PROT
- Ciais P, 2010, GLOBAL CHANGE BIOL, V16, P1395, DOI 10.1111/j.1365-2486.2009.02098.x
- Cohen AJ, 2017, LANCET, V389, P1907, DOI [10.1016/S0140-6736(17)30505-6, 10.1016/s0140-6736(17)30505-6]
- Energy Statistics Division of National Bureau of Statistics, 1986, CHINA ENERGY STAT YB
- Feng W, 2002, INT MIGR REV, V36, P520
- Gong P, 2012, LANCET, V379, P843, DOI 10.1016/S0140-6736(11)61878-3
- Grell GA, 2005, ATMOS ENVIRON, V39, P6957, DOI 10.1016/j.atmosenv.2005.04.027
- Guo HY, 2017, SCI REP-UK, V7, DOI 10.1038/s41598-017-11704-0
- Huang K, 2012, ATMOS CHEM PHYS, V12, P11631, DOI 10.5194/acp-12-11631-2012
- Huang TB, 2017, ENVIRON SCI TECHNOL, V51, P7992, DOI 10.1021/acs.est.7b02235
- Huang Y, 2014, ENVIRON SCI TECHNOL, V48, P13834, DOI 10.1021/es503696k
- Institute for Health Metrics and Evaluation, 2016, GBD COMPARE
- Krey V, 2012, ENERG ECON, V34, pS272, DOI 10.1016/j.eneco.2012.04.013
- Lai HYH, 2002, MOD CHINA, V28, P432, DOI 10.1177/009770002237663
- Lei Y, 2011, ATMOS CHEM PHYS, V11, P931, DOI 10.5194/acp-11-931-2011
- Leng Sidney, 2017, S CHINA MORNING POST
- Mashable, 2017, BEIJ NEW YEAR SMOG W
- Meng X, 2001, J COMP ECON, V29, P485, DOI 10.1006/jceec.2001.1730
- Ministry of Agriculture of the People's Republic of China, 1997, CHIN RUR EN YB
- National Bureau of Statistics of the People's Republic of China, 2014, NAT STAT YB 2013
- National Bureau of Statistics of the People's Republic of China, 2016, CENS DAT
- National Health and Family Planning Committee (NHFPC), 2015, CHIN HLTH FAM PLANN
- Ohara T, 2007, ATMOS CHEM PHYS, V7, P4419, DOI 10.5194/acp-7-4419-2007
- Ramaswami A, 2016, SCIENCE, V352, P940, DOI 10.1126/science.aaf7160
- Ru MY, 2015, ENVIRON SCI TECHNOL, V49, P13708, DOI 10.1021/acs.est.5b03374
- Seeborg M.C., 2000, J SOCIO-ECON, V29, P39, DOI DOI 10.1016/S1053-5357(00)00052-4
- Shen HZ, 2017, SCI ADV, V3, DOI 10.1126/sciadv.1700300
- Shen HZ, 2014, SCI REP-UK, V4, DOI 10.1038/srep06561
- Shen HZ, 2013, ENVIRON SCI TECHNOL, V47, P6415, DOI 10.1021/es400857z
- Shi L., 2008, RURAL MIGRANT WORKER
- Wang GH, 2016, P NATL ACAD SCI USA, V113, P13630, DOI 10.1073/pnas.1616540113
- Wang R, 2012, ENVIRON SCI TECHNOL, V46, P7595, DOI 10.1021/es3003684
- Wong DFK, 2007, INT J SOC WELF, V16, P32, DOI 10.1111/j.1468-2397.2007.00475.x
- Wu H X, 1996, Asia Pac Econ Lit, V10, P54, DOI 10.1111/j.1467-8411.1996.tb00016.x
- Yang GH, 2013, LANCET, V381, P1987, DOI 10.1016/S0140-6736(13)61097-1
- Zhang JJ, 2007, ENVIRON HEALTH PERSP, V115, P848, DOI 10.1289/ehp.9479
- Zhang KH, 2003, CHINA ECON REV, V14, P386, DOI 10.1016/j.chieco.2003.09.018
- Zhao YH, 1999, ECON DEV CULT CHANGE, V47, P767, DOI 10.1086/452431
- [Anonymous], 2009, BBC NEWS

NR 48

TC 0

Z9 0

U1 16

U2 16

PU PERGAMON-ELSEVIER SCIENCE LTD

PI OXFORD

PA THE BOULEVARD, LANGFORD LANE, KIDLINGTON, OXFORD OX5 1GB, ENGLAND

SN 0160-4120

EI 1873-6750

J9 ENVIRON INT

JI Environ. Int.

PD APR

PY 2018

VL 113  
 BP 290  
 EP 299  
 DI 10.1016/j.envint.2017.11.033  
 PG 10  
 WC Environmental Sciences  
 SC Environmental Sciences & Ecology  
 GA GB3RZ  
 UT WOS:000428976700032  
 PM 29402553  
 DA 2018-05-03  
 ER

PT J

AU Kangas, HL

Lazarevic, D

Kivimaa, P

AF Kangas, Hanna-Liisa

Lazarevic, David

Kivimaa, Paula

TI Technical skills, disinterest and non-functional regulation: Barriers to building energy efficiency in Finland viewed by energy service companies

SO ENERGY POLICY

LA English

DT Article

DE Energy services; Barriers; Energy efficiency; Ecosystem; Energy service company; Buildings

ID POLICY MIXES; CREATIVE DESTRUCTION; MARKET; MODEL; KEY; STRATEGY; BENEFITS; INDUSTRY; FOSTER

AB Energy inefficiency in the building stock is a substantial contributor to climate change. Integrated energy service companies (IESCs) have a potentially important role in improving energy efficiency. This paper presents a qualitative analysis of the energy efficiency barriers in the Finnish building sector based on data from interviews with twelve IESCs. Taking a novel supply side perspective, we place IESCs at the centre of the emerging energy services business ecosystem to identify the barriers and hindering factors (real world illustrations of barriers). From this perspective, we also examine cause-effect relationships between the hindering factors and the actors. Hindering factors, reported by IESCs, were categorised under a revised barrier taxonomy consisting of economic market failures and economic market, behavioural, organisational and institutional barriers. The most salient hindering factors lack of technical skills, disinterest in energy efficiency improvements and non-functional regulation were analysed with respect to ecosystem actors causing and affected by these factors. Public actors have a key role in overcoming these barriers, for instance, by creating new possibilities for entrants to take part in decision-making, increasing the functionality and practicality of policies and by providing up-to date energy efficiency information.

C1 [Kangas, Hanna-Liisa; Lazarevic, David; Kivimaa, Paula] Finnish Environm Inst SYKE, Environm Policy Ctr, PL 140, Helsinki 00251, Finland.

[Lazarevic, David] KTH Royal Inst Technol, Dept Sustainable Dev Environm Sci & Engn, Tekn Ringen 23, SE-10044 Stockholm, Sweden.

[Kivimaa, Paula] Univ Sussex, SPRU, Sussex House, Brighton BN1 9RH, E Sussex, England.

RP Lazarevic, D (reprint author), Finnish Environm Inst SYKE, Environm Policy Ctr, PL 140, Helsinki 00251, Finland.; Lazarevic, D (reprint author), KTH Royal Inst Technol, Dept Sustainable Dev Environm Sci & Engn, Tekn Ringen 23, SE-10044 Stockholm, Sweden.

EM hanna-liisa.kangas@ymparisto.fi; david.lazarevic@ymparisto.fi;  
 P.Kivimaa@sussex.ac.uk

FU Academy of Finland [286230]; Finnish Environment Institute (SYKE); UK EPSRC through the Centre for Innovation and Energy Demand [EP/KO11790/1]

FX This work was funded by the Academy of Finland (Decision Number 286230) as a part of New Energy Academy Programme and the Finnish Environment Institute (SYKE) and supported by the UK EPSRC through the Centre for Innovation and Energy Demand (grant number EP/KO11790/1).

- CR Adner R, 2006, HARVARD BUS REV, V84, P98
- Airaksinen M., 2013, RAKENNETUN YMPARISTO
- Astmarsson B, 2013, ENER POLICY, V63, P355, DOI 10.1016/j.enpol.2013.08.046
- Autio E., 2014, OXFORD HDB INNOVATIO, P1
- Bertoldi P, 2006, ENER POLICY, V34, P1818, DOI 10.1016/j.enpol.2005.01.010
- Bertoldi P., 2014, ESCO MARKET REPORT 2
- BLUMSTEIN C, 1980, ENERGY, V5, P355, DOI 10.1016/0360-5442(80)90036-5
- Brown MA, 2001, ENER POLICY, V29, P1197, DOI 10.1016/S0301-4215(01)00067-2
- Cagno E, 2013, RENEW SUST ENER REV, V19, P290, DOI 10.1016/j.rser.2012.11.007
- Chai KH, 2012, ENER POLICY, V46, P460, DOI 10.1016/j.enpol.2012.04.012
- Clarysse B, 2014, RES POLICY, V43, P1164, DOI 10.1016/j.respol.2014.04.014
- Duplessis B, 2012, ENER POLICY, V45, P268, DOI 10.1016/j.enpol.2012.02.031
- Energy Efficiency Watch, 2013, IMPR IMPL NAT EN EFF
- EU, 2016, BUILDINGS
- Forsstrom J, 2011, VTT RES NOTES, V2581, P12
- Gillingham K., 2009, NBER WORKING PAPER S
- Gillingham K., 2013, BRIDGING ENERGY EFFI
- Hannon M., 2012, THESIS
- Hannon MJ, 2015, ENER POLICY, V78, P198, DOI 10.1016/j.enpol.2014.11.016
- HAUSMAN JA, 1979, BELL J ECON, V10, P33, DOI 10.2307/3003318
- Heikkila M, 2012, TECHNOL INNOV MANAG, P18
- Heiskanen E., 2012, WORKING PAPER
- JAFFE AB, 1994, ENER POLICY, V22, P804, DOI 10.1016/0301-4215(94)90138-4
- Kemp R, 2011, ECOL ECON, V72, P28, DOI 10.1016/j.ecolecon.2011.09.014
- Kern F, 2017, ENERGY RES SOC SCI, V23, P11, DOI 10.1016/j.erss.2016.11.002
- Kindstrom D, 2017, ENER EFFIC, V10, P21, DOI 10.1007/s12053-016-9437-8
- Kindstrom D, 2016, APPL ENER, V171, P491, DOI 10.1016/j.apenergy.2016.03.092
- Kivimaa P., 2008, INNOVATION EFFECTS E
- Kivimaa P, 2017, ENERGY RES SOC SCI, V33, P115, DOI 10.1016/j.erss.2017.09.002
- Kivimaa P, 2016, RES POLICY, V45, P205, DOI 10.1016/j.respol.2015.09.008
- Kyro R, 2012, BUILD ENVIRON, V56, P203, DOI 10.1016/j.buildenv.2012.03.008
- Levine M, 2007, REP INTERGOV PANEL C, V2007, P387
- Mahapatra K, 2013, APPL ENER, V112, P1558, DOI 10.1016/j.apenergy.2013.01.010
- Makinen S.J., 2012, 2012 P 18 INT C ENG
- Marino A, 2011, ENER POLICY, V39, P6190, DOI 10.1016/j.enpol.2011.07.019
- Meeus L., 2012, ELECT J, V25, P57, DOI DOI 10.1016/J.TEJ.2012.05.014
- MOORE JF, 1993, HARVARD BUS REV, V71, P75
- Moore J. F, 1996, DEATH COMPETITION LE
- Nagesha N, 2006, ENERGY, V31, P1969, DOI 10.1016/j.energy.2005.07.002
- Nolden C, 2016, ENER EFFIC, V9, P1405, DOI 10.1007/s12053-016-9430-2
- Patari S, 2016, ENER EFFIC, V9, P1447, DOI 10.1007/s12053-016-9433-z
- Pulkka L, 2016, CONSTR MANAG ECON, V34, P129, DOI 10.1080/01446193.2016.1179773
- Robinson M, 2015, ENER CONVERS MANAGE, V94, P233, DOI 10.1016/j.enconman.2015.01.057
- Rosenow J, 2017, ENER POLICY, V107, P53, DOI 10.1016/j.enpol.2017.04.014
- Sorrell S., 2000, BARRIERS ENERGY EFFI
- Sorrell S, 2007, ENER POLICY, V35, P507, DOI 10.1016/j.enpol.2005.12.009
- Sorrell S, 2015, RENEW SUST ENER REV, V47, P74, DOI 10.1016/j.rser.2015.03.002
- Statistics Finland, 2016, IS REF NOT PART TEXT
- Stern P. C., 1984, ENERGY USE HUMAN DIM
- Sweatman P., 2012, ASSESSMENT STRUCTURI
- Thomas L.D.W., 2012, DRUID SOC C INN COMP, P1
- Tuominen P, 2012, ENER BUILDINGS, V51, P48, DOI 10.1016/j.enbuild.2012.04.015
- Vehvilainen I., 2016, SITRAN SELVITYKSIA, V39, P2010
- Vine E, 2005, ENER POLICY, V33, P691, DOI 10.1016/j.enpol.2003.09.014
- Vogel J, 2016, ENER EFFIC, V9, P109, DOI 10.1007/s12053-015-9352-4
- Weber L, 1997, ENER POLICY, V25, P833, DOI 10.1016/S0301-4215(97)00084-0

NR 56

TC 0

Z9 0  
 U1 7  
 U2 7  
 PU ELSEVIER SCI LTD  
 PI OXFORD  
 PA THE BOULEVARD, LANGFORD LANE, KIDLINGTON, OXFORD OX5 1GB, OXON, ENGLAND  
 SN 0301-4215  
 EI 1873-6777  
 J9 ENERG POLICY  
 JI Energy Policy  
 PD MAR  
 PY 2018  
 VL 114  
 BP 63  
 EP 76  
 DI 10.1016/j.enpol.2017.11.060  
 PG 14  
 WC Economics; Energy & Fuels; Environmental Sciences; Environmental Studies  
 SC Business & Economics; Energy & Fuels; Environmental Sciences & Ecology  
 GA FW0DY  
 UT WOS:000424962800007  
 DA 2018-05-03  
 ER

PT J

AU Long, C  
 Mills, BF  
 Schleich, J

AF Long, Christopher  
 Mills, Bradford F.  
 Schleich, Joachim

TI Characteristics or culture? Determinants of household energy use  
 behavior in Germany and the USA

SO ENERGY EFFICIENCY

LA English

DT Article

DE Energy use; Household behavior; Oaxaca-Blinder decomposition; Germany;  
 United States

ID CONSERVATION; EFFICIENCY; PERCEPTIONS; CONSUMPTION; INVESTMENTS;  
 PREFERENCES; COMPETITION; ATTITUDES; CITIZENS; ADOPTION

AB Multilateral climate agreements are more likely to be successful when they acknowledge and address both differences in country energy use behavior and the factors that shape behavior. This paper employs an Oaxaca-Blinder decomposition to analyze factors underlying differences in residential energy use behavior in Germany and the USA. We focus on three household decisions: purchasing energy-efficient appliances, employing energy-saving measures like turning off lights when leaving a room, and purchasing fuel-efficient vehicles. For all of these decisions, US household adoption is significantly lower than German household adoption. These differences in observed energy use behavior are decomposed into components arising from differences in country mean characteristic and from differences in adoption propensities for given characteristics. Both country characteristics and propensities contribute to observed energy use behavior differences in German and US households. In particular, perceptions of the human role in climate change, financial advantages of energy savings, and effectiveness of energy savings in combating climate change play significant roles in generating observed country difference.

C1 [Long, Christopher] Univ Virginia, Charlottesville, VA USA.

[Mills, Bradford F.; Schleich, Joachim] Virginia Tech, Blacksburg, VA 24061 USA.

[Schleich, Joachim] Fraunhofer Inst Syst & Innovat Res, Karlsruhe, Germany.

[Schleich, Joachim] Grenoble Ecole Management, Grenoble, France.

RP Mills, BF (reprint author), Virginia Tech, Blacksburg, VA 24061 USA.

EM bfmills@vt.edu

- OI Schleich, Joachim/0000-0001-6079-7240
- FU German Federal Ministry of Education and Research [01 LA 1123 B]; US NSF Division of Chemistry Award Research Experience for Undergraduates summer fellowship at Virginia Tech [1560240]
- FX Data was collected within a project titled "The Relevance of Voluntary Efforts and Fairness Preferences for the Success of International Climate Policy: A Theoretical and Empirical Analysis at the Individual Level" (VolFair). VolFair is supported by the Bundesministerium für Bildung und Forschung (German Federal Ministry of Education and Research) under the funding priority "Economics of climate change" (grant number 01 LA 1123 B). We thank Elisabeth Dutschke, Claudia Schwirplies, and Andreas Ziegler for their substantial contribution to the design and implementation of the survey. Long was supported through a US NSF Division of Chemistry Award (1560240) Research Experience for Undergraduates summer fellowship at Virginia Tech.
- CR Akerlof GA, 2007, AM ECON REV, V97, P5, DOI 10.1257/aer.97.1.5
- Allcott H., 2014, REV ECON STAT, V156, P1
- Ameli N, 2015, ENVIRON RES LETT, V10, DOI 10.1088/1748-9326/10/4/044015
- Arora R., 2005, GALLUP
- Attari SZ, 2010, P NATL ACAD SCI USA, V107, P16054, DOI 10.1073/pnas.1001509107
- Bartiaux F., 2006, SCI SUPPORT PLAN SUS
- BLACK JS, 1985, J APPL PSYCHOL, V70, P3, DOI 10.1037//0021-9010.70.1.3
- BLINDER AS, 1973, J HUM RESOUR, V8, P436, DOI 10.2307/144855
- Bowles S, 2008, SCIENCE, V320, P1605, DOI 10.1126/science.1152110
- Brechling V, 1994, FISCAL STUDIES, V15, P44, DOI 10.1111/J.1475-5890.1994.TB00196.X
- Cayla J.M., 2010, ACEEE SUMMER STUDY E
- Cohen F, 2017, EUR ECON REV, V93, P1, DOI 10.1016/j.euroecorev.2017.01.004
- CURTIS FA, 1984, ENERG POLICY, V12, P452, DOI 10.1016/0301-4215(84)90109-5
- D'Alessio G., 2013, ARE GERMANS POORER O
- Davis L. W., 2011, DESIGN IMPLEMENTATIO, P301
- Di Maria C, 2010, SCOT J POLIT ECON, V57, P48, DOI 10.1111/j.1467-9485.2009.00506.x
- Dunlap RE, 2000, J SOC ISSUES, V56, P425, DOI 10.1111/0022-4537.00176
- Dupont DP, 2004, ECOL ECON, V49, P273, DOI 10.1016/j.ecolecon.2004.01.013
- European Central Bank, 2013, EUR CENTR BANK STAT, V2
- Fehr E, 2002, ECON J, V112, pC1, DOI 10.1111/1468-0297.00027
- Lopez AG, 2008, PSICOTHEMA, V20, P623
- Greening LA, 2000, ENERG POLICY, V28, P389
- HASSETT KA, 1995, J PUBLIC ECON, V57, P201, DOI 10.1016/0047-2727(94)01452-T
- Hirst E., 1982, ENERGY SYSTEMS POLIC, V6, P135
- IPCC, 2014, CLIM CHANG 2014 SYNT
- JAFFE AB, 1994, ENERGY J, V15, P43
- Kahn ME, 2007, J ENVIRON ECON MANAG, V54, P129, DOI 10.1016/j.jeem.2007.05.001
- Kammerer D, 2009, ECOL ECON, V68, P2285, DOI 10.1016/j.ecolecon.2009.02.016
- Kolmuss A., 2002, ENVIRON EDUC RES, V8, P239, DOI 10.1080/13504620220145401
- Krishnamurthy CKB, 2015, ENERG J, V36, P85, DOI 10.5547/01956574.36.4.ckri
- Leiserowitz A., 2010, AM KNOWLEDGE CLIMATE
- LONG JE, 1993, ENERG ECON, V15, P232, DOI 10.1016/0140-9883(93)90012-G
- Mills B, 2012, ENERG POLICY, V49, P616, DOI 10.1016/j.enpol.2012.07.008
- Mills BF, 2010, RESOUR ENERGY ECON, V32, P363, DOI 10.1016/j.reseneeco.2009.10.002
- Murray AG, 2014, CONTEMP ECON POLICY, V32, P811, DOI 10.1111/coep.12050
- OECD, 2011, GREEN HOUS BEH OV 20
- Olli E, 2001, ENVIRON BEHAV, V33, P181, DOI 10.1177/0013916501332002
- PBL, 2014, TRENDS GLOB CO2 EM
- Pew Research Center, 2015, SUB SAH AFR
- Qiu YM, 2014, ECOL ECON, V107, P216, DOI 10.1016/j.ecolecon.2014.09.002
- Reiss PC, 2008, RAND J ECON, V39, P636, DOI 10.1111/j.1756-2171.2008.00032.x
- Sardianou E, 2013, RENEW ENERG, V57, P1, DOI 10.1016/j.renene.2013.01.031
- Schleich J., 2014, 532014 MAGKS



Schleich J, 2017, ENER POLICY, V103, P62, DOI 10.1016/j.enpol.2017.01.014  
 Schleich J, 2016, ENER POLICY, V97, P321, DOI 10.1016/j.enpol.2016.07.044  
 SCHULTZ TW, 1975, J ECON LIT, V13, P827  
 Scott S, 1997, ENER ECON, V19, P187, DOI 10.1016/S0140-9883(96)01000-6  
 Sjoberg L, 2005, INT REV SOCIOL, V15, P327, DOI 10.1080/03906700500159755  
 Steentjes K., 2017, EUROPEAN PERCEPTION  
 Thapa B., 1999, B SCI TECHNOL SOC, V19, P432  
 Torgler B., 2008, DIFFERENCES PREFEREN  
 Urban J, 2016, ENVIRON BEHAV, V48, P454, DOI 10.1177/0013916514547081  
 Urban J, 2012, ENER POLICY, V47, P69, DOI 10.1016/j.enpol.2012.04.018  
 United States Environmental Protection Agency, 2016, GLOB GREENH GAS EM D  
 VERHALLEN TMM, 1981, J CONSUM RES, V8, P253, DOI 10.1086/208862  
 Vespa J., 2013, AM FAMILIES LIVING A

NR 56

TC 0

Z9 0

U1 6

U2 6

PU SPRINGER

PI DORDRECHT

PA VAN GODEWIJCKSTRAAT 30, 3311 GZ DORDRECHT, NETHERLANDS

SN 1570-646X

EI 1570-6478

J9 ENER EFFIC

JI Energy Effic.

PD MAR

PY 2018

VL 11

IS 3

BP 777

EP 798

DI 10.1007/s12053-017-9596-2

PG 22

WC GREEN & SUSTAINABLE SCIENCE & TECHNOLOGY; Energy & Fuels; Environmental Studies

SC Science & Technology - Other Topics; Energy & Fuels; Environmental Sciences & Ecology

GA FX4OC

UT WOS:000426056700016

DA 2018-05-03

ER

PT J

AU Trotta, G

AF Trotta, Gianluca

TI Factors affecting energy-saving behaviours and energy efficiency investments in British households

SO ENERGY POLICY

LA English

DT Article

DE Energy behaviours; Energy efficiency; Appliances; Retrofit; Energy saving; British households

ID PRO-ENVIRONMENTAL BEHAVIOR; EUROPEAN COUNTRIES; SOCIAL NORMS; CONSERVATION; ATTITUDES; GAP; CONSUMPTION; BARRIERS; HEALTH; US

AB The objective of this paper is to identify the socio-demographic, dwelling, and environmental factors that have the strongest influence on the daily energy-saving behaviours, the adoption of energy efficient appliances and the energy efficient retrofit investments made by British households. This study uses British household data from the "Survey of Public Attitudes and Behaviours towards the Environment"

collected in 2009, and employs nonlinear principal components analysis (NLPCA), ordinary least squares (OLS) regression, and probit models. The results show different household profiles with specific features driving daily energy-saving behaviours and energy efficiency investments. Environmental variables are a good predictor of both energy-saving behaviours and investment in energy efficient appliances but not of energy efficient retrofit measures. Results of income and dwelling type variables with regard to energy-saving behaviours and energy efficient retrofit investments significantly diverge; in addition, interesting patterns emerge with respect to the respondents' age, sex, and marital status. By evaluating and understanding the household and dwelling characteristics that affect energy-saving behaviours and energy efficiency investments, it is possible to obtain a clearer idea of where and how energy and emissions savings can be made, and to propose effective and targeted policies that promote energy-responsible lifestyles.

C1 [Trotta, Gianluca] Univ Vaasa, Fac Business Studies Econ & Business Law Econ, Dept Econ, Off Tervahovi D210, Wolffintie 34, Vaasa 65200, Finland.

RP Trotta, G (reprint author), Univ Vaasa, Fac Business Studies Econ & Business Law Econ, Dept Econ, Off Tervahovi D210, Wolffintie 34, Vaasa 65200, Finland.

EM Gianluca.Trotta@uva.fi

FU Academy of Finland [Akademian/Kalmi/2700041011]

FX This work has been partially supported by the Academy of Finland under the project grant Akatemia/Kalmi/2700041011. The author would like to thank the anonymous reviewers, the participants of the Finnish Economic Association XXXIX Annual Meeting, Panu Kalmi, Rauli Svento, and Anna Sahari for their valuable comments and suggestions to improve the quality of the paper.

CR Abrahamse W, 2009, J ECON PSYCHOL, V30, P711, DOI 10.1016/j.joep.2009.05.006

Allcott H, 2012, J ECON PERSPECT, V26, P3, DOI 10.1257/jep.26.1.3

Allcott H, 2011, J PUBLIC ECON, V95, P1082, DOI 10.1016/j.jpubeco.2011.03.003

Ameli N., 2014, WORKING PAPER SERIES, V1165

Ameli N., 2015, OECD EC DEP WORKING

Barr S, 2005, ENERG POLICY, V33, P1425, DOI 10.1016/j.enpol.2003.12.016

Bartus Tamas, 2005, STATA J, V5, P309

Beckmann SC, 2005, CONSUMERS, POLICY AND THE ENVIRONMENT: A TRIBUTE TO FOLKE

OLANDER, P265, DOI 10.1007/0-387-25004-2\_15

BLACK JS, 1985, J APPL PSYCHOL, V70, P3, DOI 10.1037//0021-9010.70.1.3

Blake J., 1999, LOCAL ENVIRON, V4, P257, DOI DOI 10.1080/13549839908725599

Blasch J., 2017, RESOUR ENERGY EC

Blasch J., 2017, CER ETH EC WORKING P, V17

BLUMSTEIN C, 1980, ENERGY, V5, P355, DOI 10.1016/0360-5442(80)90036-5

Bousquet J., 2014, DETERMINANTS SPACE H

Brounen D, 2012, EUR ECON REV, V56, P931, DOI 10.1016/j.eurocorev.2012.02.007

Caird S, 2008, ENERG EFFIC, V1, P149, DOI 10.1007/s12053-008-9013-y

Carlsson-Kanyama A, 2007, ENERG POLICY, V35, P2163, DOI 10.1016/j.enpol.2006.06.018

Chai KH, 2012, ENERG POLICY, V46, P460, DOI 10.1016/j.enpol.2012.04.012

Courtenay-Hall P., 2002, ENVIRON EDUC RES, V8, DOI [10.1080/13504620220145438, DOI 10.1080/13504620220145438]

CURTIS FA, 1984, ENERG POLICY, V12, P452, DOI 10.1016/0301-4215(84)90109-5

Department for Communities and Local Government, 2013, ENGL HOUS SURV ENERG

Department for Environment, 2009, FOOD RUR AFF ENV STA

Diekmann A, 2003, RATION SOC, V15, P441, DOI 10.1177/1043463103154002

Dietz T, 2009, P NATL ACAD SCI USA, V106, P18452, DOI 10.1073/pnas.0908738106

Dixon T, 2013, BUILD RES INF, V41, P499, DOI 10.1080/09613218.2013.812432

EEA, 2012, EUR ENV STAT OUTL 20

Ek K, 2010, ENERG POLICY, V38, P1578, DOI 10.1016/j.enpol.2009.11.041

Ewert A, 2009, ENVIRON EDUC RES, V15, P55, DOI 10.1080/13504620802613504

Fell MJ, 2017, ENERGY RES SOC SCI, V27, P129, DOI 10.1016/j.erss.2017.02.010

Flynn R, 2009, SOCIOL REV, V57, P159, DOI 10.1111/j.1467-954X.2010.01891.x

Frederiks ER, 2015, ENERGIES, V8, P573, DOI 10.3390/en8010573

Frederiks ER, 2015, RENEW SUST ENERG REV, V41, P1385, DOI 10.1016/j.rser.2014.09.026

Gadenne D, 2011, ENERG POLICY, V39, P7684, DOI 10.1016/j.enpol.2011.09.002

- Gamtesa SF, 2013, ENER G BUILDINGS, V57, P155, DOI 10.1016/j.enbuild.2012.11.006
- Gardner GT, 2008, ENVIRONMENT, V50, P12, DOI 10.3200/ENV.50.5.12-25
- Gardner G. T., 2002, ENV PROBLEMS HUMAN B
- Gaspar R, 2011, ENER G POLICY, V39, P7335, DOI 10.1016/j.enpol.2011.08.057
- Gatersleben B, 2002, ENVIRON BEHAV, V34, P335, DOI 10.1177/0013916502034003004
- Gerarden T. D., 2015, ASSESSING ENERGY EFF
- Gillingham K., 2014, REV ENV ECON POLICY
- GMI/Mintel, 2013, WASH DRYERS UK
- GMI/Mintel, 2014, FRIDG FREEZ UK
- Gram-Hanssen K., 2009, ENHR EUR HOUS RES NE
- Gram-Hanssen K., 2011, WORLD REN EN C 2011
- Greene W. H., 2008, BIVARIATE LATENT CLA
- Grey CNB, 2017, BMC PUBLIC HEALTH, V17, DOI 10.1186/s12889-017-4075-4
- Hamilton IG, 2016, ENER G BUILDINGS, V118, P259, DOI 10.1016/j.enbuild.2016.02.024
- Hough D., 2017, 06814 CBP
- Howard R., 2015, WARMER HOMES IMPROVI
- Howden-Chapman P, 2012, ENER G POLICY, V49, P134, DOI 10.1016/j.enpol.2011.09.044
- Hunt LC, 2015, ENER G ECON, V50, P273, DOI 10.1016/j.eneco.2015.05.006
- [Anonymous], 2014, EN EFF IND FUND STAT
- IEA, 2014, CAPT MULT BEN EN EFF
- TEA, 2014, EN EFF IND ESS POL M
- JAFFE AB, 1994, ENER G POLICY, V22, P804, DOI 10.1016/0301-4215(94)90138-4
- JAFFE AB, 1994, RESOUR ENERGY ECON, V16, P91, DOI 10.1016/0928-7655(94)90001-9
- Nordlund A., 2009, J EUROMARKETING, V18, P245, DOI DOI 10.1080/10496480903364242
- Kallbekken Steffen, 2013, Journal of Consumer Policy, V36, P1, DOI 10.1007/s10603-012-9211-z
- Kang NN, 2012, ENER G BUILDINGS, V46, P112, DOI 10.1016/j.enbuild.2011.10.039
- Laitner J. A., 2009, EXAMINING SCALE BEHA
- Liao HC, 2002, ENER G ECON, V24, P267, DOI 10.1016/S0140-9883(02)00014-2
- Linden AL, 2006, ENER G POLICY, V34, P1918, DOI 10.1016/j.enpol.2005.01.015
- Linting M, 2007, PSYCHOL METHODS, V12, P336, DOI 10.1037/1082-989X.12.3.336
- Lopes MAR, 2012, RENEW SUST ENER G REV, V16, P4095, DOI 10.1016/j.rser.2012.03.034
- Maller CJ, 2011, URBAN POLICY RES, V29, P59, DOI 10.1080/08111146.2011.539514
- Martinsson J, 2011, ENER G POLICY, V39, P5182, DOI 10.1016/j.enpol.2011.05.046
- Mills B, 2012, ENER G POLICY, V49, P616, DOI 10.1016/j.enpol.2012.07.008
- Morley J., 2011, SIGNIFICANCE DIFFERE
- Nair G, 2010, ENER G POLICY, V38, P2956, DOI 10.1016/j.enpol.2010.01.033
- Nardo M., 2005, HDB CONSTRUCTING COM
- Nolan JM, 2008, PERS SOC PSYCHOL B, V34, P913, DOI 10.1177/0146167208316691
- O'Doherty J, 2008, APPL ENER G, V85, P650, DOI 10.1016/j.apenergy.2008.01.001
- Odyssee database, 2017, DAT EN CONS DRIV END
- Oikonomou V, 2009, ENER G POLICY, V37, P4787, DOI 10.1016/j.enpol.2009.06.035
- OLSEN ME, 1981, J SOC ISSUES, V37, P108, DOI 10.1111/j.1540-4560.1981.tb02628.x
- ONS, 2011, APP A DEF TERMS GEN
- Palmer J., 2013, UK HOUSING ENERGY FA
- Paulhus D. L., 2002, CONSTR PSYCHOL ED ME, P49459
- Payne J., 2015, CAPTURING MULTIPLE B
- Platt R., 2013, HELP HEAT SOLUTION A
- Podsakoff PM, 2003, J APPL PSYCHOL, V88, P879, DOI 10.1037/0021-9101.88.5.879
- Pollitt MG, 2011, ROLE BEHAV EC ENERGY
- Poortinga W, 2004, ENVIRON BEHAV, V36, P70, DOI 10.1177/0013916503251466
- Poortinga W, 2003, J ECON PSYCHOL, V24, P49, DOI 10.1016/S0167-4870(02)00154-X
- Poortinga W., 2017, BUILD RES INF, P1
- Pothitou M, 2016, APPL ENER G, V184, P1217, DOI 10.1016/j.apenergy.2016.06.017
- Pothitou M, 2016, INT J SUSTAIN ENERGY, V35, P686, DOI 10.1080/14786451.2014.936867
- Ramos A, 2016, ENVIRON RESOUR ECON, V63, P367, DOI 10.1007/s10640-015-9899-8
- Raty R, 2010, ENER G POLICY, V38, P646, DOI 10.1016/j.enpol.2009.08.010
- Santin OG, 2009, ENER G BUILDINGS, V41, P1223, DOI 10.1016/j.enbuild.2009.07.002
- Sardianou E, 2007, ENER G POLICY, V35, P3778, DOI 10.1016/j.enpol.2007.01.020

Schleich J, 2008, ENERGETICS, V30, P449, DOI 10.1016/j.eneco.2006.08.004  
Schultz PW, 2007, PSYCHOL SCI, V18, P429, DOI 10.1111/j.1467-9280.2007.01917.x  
Stemmers K, 2009, BUILD RES INF, V37, P625, DOI 10.1080/09613210903186661  
Steg L, 2015, FRONT PSYCHOL, V6, DOI 10.3389/fpsyg.2015.00805  
Steg L, 2009, J ENVIRON PSYCHOL, V29, P309, DOI 10.1016/j.jenvp.2008.10.004  
Steg L, 2008, ENERGETICS, V36, P4449, DOI 10.1016/j.enpol.2008.09.027  
STERN PC, 1992, AM PSYCHOL, V47, P1224, DOI 10.1037//0003-066X.47.10.1224  
Sutton A., 2011, FUTURE FIT REPORT 1  
Thomson H, 2015, SOC SCI MED, V124, P205, DOI 10.1016/j.socscimed.2014.11.043  
Trotta G., 2015, CONSUMERS ENERGY EFF  
Urban J, 2012, ENERGETICS, V47, P69, DOI 10.1016/j.enpol.2012.04.018  
Wiedenhofer D, 2011, URBAN CONSUMPTION, P251  
Williams Jo, 2007, Environment Development and Sustainability, V9, P325, DOI 10.1007/s10668-006-9068-x  
World Energy Council, 2016, WORLD EN TRIL 2016  
York CM., 1978, BIBLIO I BARRIERS EN

NR 106

TC 0

Z9 0

U1 11

U2 11

PU ELSEVIER SCI LTD

PI OXFORD

PA THE BOULEVARD, LANGFORD LANE, KIDLINGTON, OXFORD OX5 1GB, OXON, ENGLAND

SN 0301-4215

EI 1873-6777

J9 ENERGETICS

J1 Energy Policy

PD MAR

PY 2018

VL 114

BP 529

EP 539

DI 10.1016/j.enpol.2017.12.042

PG 11

WC Economics; Energy & Fuels; Environmental Sciences; Environmental Studies

SC Business & Economics; Energy & Fuels; Environmental Sciences & Ecology

GA FW0DY

UT WOS:000424962800049

DA 2018-05-03

ER

PT J

AU Rahman, A

Srikumar, V

Smith, AD

AF Rahman, Aowabin

Srikumar, Vivek

Smith, Amanda D.

TI Predicting electricity consumption for commercial and residential

buildings using deep recurrent neural networks

SO APPLIED ENERGY

LA English

DT Article

DE Building energy modeling; Machine learning; Recurrent neural networks;

Deep learning; Electric load prediction

ID OF-THE-ART; ENERGY-CONSUMPTION; MODELS

AB This paper presents a recurrent neural network model to make medium-to-long term predictions, i.e. time horizon of  $\geq 1$  week, of electricity consumption profiles in commercial and residential buildings at one-

hour resolution. Residential and commercial buildings are responsible for a significant fraction of the overall energy consumption in the U.S. With advances in sensors and smart technologies, there is a need for medium to longterm prediction of electricity consumption in residential and commercial buildings at hourly intervals to support decision making pertaining to operations, demand response strategies, and installation of distributed generation systems. The modeler may have limited access to information about building's schedules and equipment, making data-driven machine learning models attractive. The energy consumption data that is available may also contain blocks of missing data, making time-series predictions difficult. Thus, the main objectives of this paper are: (a) Develop and optimize novel deep recurrent neural network (RNN) models aimed at medium to long term electric load prediction at one-hour resolution; (b) Analyze the relative performance of the model for different types of electricity consumption patterns; and (c) Use the deep NN to perform imputation on an electricity consumption dataset containing segments of missing values. The proposed models were used to predict hourly electricity consumption for the Public Safety Building in Salt Lake City, Utah, and for aggregated hourly electricity consumption in residential buildings in Austin, Texas. For predicting the commercial building's load profiles, the proposed RNN sequence-to-sequence models generally correspond to lower relative error when compared with the conventional multi-layered perceptron neural network. For predicting aggregate electricity consumption in residential buildings, the proposed model generally does not provide gains in accuracy compared to the multi layered perceptron model.

C1 [Rahman, Aowabin; Smith, Amanda D.] Univ Utah, Dept Mech Engr, Site Specif Energy Syst Lab, Salt Lake City, UT 84112 USA.

[Srikumar, Vivek] Univ Utah, Sch Comp, Salt Lake City, UT 84112 USA.

RP Smith, AD (reprint author), Univ Utah, Dept Mech Engr, Site Specif Energy Syst Lab, Salt Lake City, UT 84112 USA.

EM amanda.d.smith@utah.edu

FU National Science Foundation [CBET 1512740]

FX This material is based upon work supported by the National Science Foundation under the following Grant: CBET 1512740.

CR Arahal MR, 2002, IFAC P, V35, P463

Bakirtzis EA, 2015, ELECTR POW SYST RES, V128, P90, DOI 10.1016/j.epr.2015.06.025

Bengio Y, 2016, UNPUB

Bergstra James, 2015, Computational Science and Discovery, V8, DOI 10.1088/1749-4699/8/1/014008

Bergstra J., 2013, P 12 PYTH SCI C, P13

Charytoniuk W, 1998, IEEE T POWER SYST, V13, P725, DOI 10.1109/59.708572

Cho K., LEARNING PHRASE REPR

Chollet F., 2015, KERAS

Daz S, 2018, APPL ENERGY

Dedinec A, 2016, ENERGY

El-Hawary ME, 2014, ELECTR POW COMPO SYS, V42, P239, DOI 10.1080/15325008.2013.868558

Fan C, 2017, APPL ENER, V195, P222, DOI 10.1016/j.apenergy.2017.03.064

Foucquier A, 2013, RENEW SUST ENER REV, V23, P272, DOI 10.1016/j.rser.2013.03.004

Friedrich L, 2015, ENRGY PROCED, V75, P3014, DOI 10.1016/j.egypro.2015.07.616

Fumo N, 2015, RENEW SUST ENER REV, V47, P332, DOI 10.1016/j.rser.2015.03.035

Gonzalez PA, 2005, ENER BUILDINGS, V37, P595, DOI 10.1016/j.enbuild.2004.09.006

Goude Y, 2014, IEEE T SMART GRID, V5, P440, DOI 10.1109/TSG.2013.2278425

Graves A, 2013, INT CONF ACOUST SPEE, P6645, DOI 10.1109/ICASSP.2013.6638947

Heo Y, 2012, ENER BUILDINGS, V53, P7, DOI 10.1016/j.enbuild.2012.06.024

Hochreiter S, 1997, NEURAL COMPUT, V9, P1735, DOI 10.1162/neco.1997.9.8.1735

Horel J, 2002, B AM METEOROLOGICAL

Kavousian A, 2013, ENERGY, V55, P184, DOI 10.1016/j.energy.2013.03.086

Kingma DP, ADAM METHOD STOCHAST

Kolokotsa D, 2016, ENER BUILDINGS, V116, P703, DOI 10.1016/j.enbuild.2015.12.033

Lipton ZC, ABS150600019 CORR

Lu XS, 2015, APPL ENER, V144, P261, DOI 10.1016/j.apenergy.2014.12.019

Mocanu E, 2016, SUSTAIN ENERGY GRIDS, V6, P91, DOI 10.1016/j.segan.2016.02.005

Mocanu E, 2016, ENER BUILDINGS, V116, P646, DOI 10.1016/j.enbuild.2016.01.030

PARK DC, 1991, IEEE T POWER SYST, V6, P442, DOI 10.1109/59.76685

Rallapalli H. S., 2010, THESIS

Rhodes JD, 2014, ENERGY, V65, P462, DOI 10.1016/j.energy.2013.11.004

Robinson C, 2017, APPL ENERG, V208, P889, DOI 10.1016/j.apenergy.2017.09.060  
Sutskever I., 2014, ADV NEURAL INFORM PR, P3104  
US Department of Energy, 2013, ENERGYPLUS DOC  
Yun K, 2012, ENERG BUILDINGS, V54, P225, DOI 10.1016/j.enbuild.2012.08.007  
Zaytar MA, 2016, INT J COMPUTER APPL, V143, P7  
Zhao HX, 2012, RENEW SUST ENERG REV, V16, P3586, DOI 10.1016/j.rser.2012.02.049

NR 37

TC 0

Z9 0

U1 11

U2 11

PU ELSEVIER SCI LTD

PI OXFORD

PA THE BOULEVARD, LANGFORD LANE, KIDLINGTON, OXFORD OX5 1GB, OXON, ENGLAND

SN 0306-2619

EI 1872-9118

J9 APPL ENERG

J1 Appl. Energy

PD FEB 15

PY 2018

VL 212

BP 372

EP 385

DI 10.1016/j.apenergy.2017.12.051

PG 14

WC Energy & Fuels; Engineering, Chemical

SC Energy & Fuels; Engineering

GA FW3IS

UT WOS:000425200700027

DA 2018-05-03

ER

PT J

AU Cheng, X

Li, SM

AF Cheng, Xin

Li, Simon

TI Interval Estimations of Building Heating Energy Consumption using the

Degree-Day Method and Fuzzy Numbers

SO BUILDINGS

LA English

DT Article

DE degree-day method; fuzzy number and arithmetic; interval estimation

ID OPTIMUM INSULATION THICKNESS; TYPICAL METEOROLOGICAL YEAR;

RELIABILITY-ANALYSIS; CLIMATE-CHANGE; SET APPROACH; UNCERTAINTY; DEMAND;

WEATHER; PROPAGATION; TURKEY

AB The purpose of this paper is to propagate the input uncertainties of the degree-day method to estimate the building heating energy consumption as numerical intervals. While it is common to use average or expected values (e.g., Typical Meteorological Year) to address the input uncertainties, this practice can only yield the best estimates as single-point values without informing the possible range of variations. After classifying two types of uncertainty as weather variability and imprecision in the degree-day method, this paper proposes the adoption of fuzzy numbers and their arithmetic as the theoretical approach to handle uncertainty. As the degree-day method mainly involves elementary arithmetic (e.g., addition and multiplication), fuzzy number arithmetic can be directly applied to formally process numerical intervals. The proposed method is demonstrated and verified via a building example in Canada, and the interval results are comparable to the variation of heating energy consumption based on the data of outdoor ambient temperatures in 52 years.

- C1 [Cheng, Xin; Li, Simon] Univ Calgary, Dept Mech & Mfg Engr, 2500 Univ Dr NW, Calgary, AB T2N 1N4, Canada.
- RP Li, SM (reprint author), Univ Calgary, Dept Mech & Mfg Engr, 2500 Univ Dr NW, Calgary, AB T2N 1N4, Canada.
- EM mikechengxin@gmail.com; simoli@ucalgary.ca
- FU NSERC
- FX The first author received the financial support from the NSERC Discovery Grant.
- CR Al-Homoud MS, 2001, BUILD ENVIRON, V36, P421, DOI 10.1016/S0360-1323(00)00026-3  
American Society of Heating Refrigerating and Air Conditioning Engineers, 2013, 2013 ASHRAE HDB FUND
- Amato AD, 2005, CLIMATIC CHANGE, V71, P175, DOI 10.1007/s10584-005-5931-2
- Azevedo JA, 2015, METEOROL APPL, V22, P789, DOI 10.1002/met.1525
- Baudrit C, 2006, IEEE T FUZZY SYST, V14, P593, DOI 10.1109/TFUZZ.2006.876720
- Bolatturk A, 2006, APPL THERM ENG, V26, P1301, DOI 10.1016/j.applthermaleng.2005.10.019
- CHENG CH, 1993, FUZZY SET SYST, V56, P29, DOI 10.1016/0165-0114(93)90182-H
- Ciabattoni L, 2014, ENERGY, V74, P359, DOI 10.1016/j.energy.2014.06.100
- Cox RA, 2015, BUILD ENVIRON, V83, P104, DOI 10.1016/j.buildenv.2014.04.006
- Coydon F, 2015, ENER BUILDINGS, V107, P172, DOI 10.1016/j.enbuild.2015.08.015
- Day A. R, 2005, BUILD SERV ENG RES T, V26, P115
- Day AR, 1999, BUILD SERV ENG RES T, V20, P165
- Day AR, 2003, BUILD SERV ENG RES T, V24, P221, DOI DOI 10.1191/0143624403BT073OA
- De Rosa M, 2014, APPL ENERG, V128, P217, DOI 10.1016/j.apenergy.2014.04.067
- DUBOIS D, 1993, SECOND IEEE INTERNATIONAL CONFERENCE ON FUZZY SYSTEMS, VOLS 1 AND 2, P1059, DOI 10.1109/FUZZY.1993.327367
- DUBOIS D, 1987, MATH MODELLING, V9, P461, DOI 10.1016/0270-0255(87)90512-4
- DUBOIS D, 1978, INT J SYST SCI, V9, P613, DOI 10.1080/00207727808941724
- Erdogan YS, 2013, ENG APPL ARTIF INTEL, V26, P357, DOI 10.1016/j.engappai.2012.10.003
- Giachetti RE, 1997, FUZZY SET SYST, V91, P185, DOI 10.1016/S0165-0114(97)00140-1  
Government of Canada, HIST CLIM DAT
- Guan L, 2009, BUILD ENVIRON, V44, P793, DOI 10.1016/j.buildenv.2008.05.021
- Guyonnet D, 2003, J ENVIRON ENG-ASCE, V129, P68, DOI 10.1061/(ASCE)0733-9372(2003)129:1(68)
- Janjai S, 2009, APPL ENERG, V86, P528, DOI 10.1016/j.apenergy.2008.08.008
- Kneifel J.D., 2016, NIST SP
- Kohler M, 2016, APPL ENERG, V184, P40, DOI 10.1016/j.apenergy.2016.09.075
- Kolokotsa D, 2007, ADV BUILD ENERGY RES, V1, P29, DOI 10.1080/17512549.2007.9687268
- Kurekci NA, 2016, ENER BUILDINGS, V118, P197, DOI 10.1016/j.enbuild.2016.03.004
- Lam JC, 1996, ARCHITECTURAL SCI RE, V39, P201
- Layberry RL, 2008, BUILD SERV ENG RES T, V29, P273, DOI 10.1177/0143624408093886
- Layberry RL, 2009, BUILD SERV ENG RES T, V30, P79, DOI 10.1177/0143624408098221
- Lee K.H., 2006, 1 COURSE FUZZY THEOR
- Maskey S, 2004, ADV WATER RESOUR, V27, P889, DOI 10.1016/j.advwatres.2004.07.001
- Michalik G, 1997, ENERGY, V22, P949, DOI 10.1016/S0360-5442(97)00030-3
- Mitchell J.W., 2013, PRINCIPLES HEATING V
- Moens D, 2011, FINITE ELEM ANAL DES, V47, P4, DOI 10.1016/j.finel.2010.07.010
- Moral-Carcedo J, 2005, ENERG ECON, V27, P477, DOI 10.1016/j.eneco.2005.01.003
- Moreci E, 2016, SUSTAIN CITIES SOC, V20, P81, DOI 10.1016/j.scs.2015.10.005
- Ning M, 2009, BUILD SERV ENG RES T, V30, P241, DOI 10.1177/0143624408338321
- Pusat S, 2015, RENEW ENER, V75, P144, DOI 10.1016/j.renene.2014.09.039
- Sarak H, 2003, ENERGY, V28, P929, DOI 10.1016/S0360-5442(03)00035-5
- Scherm H, 2000, ENVIRON POLLUT, V108, P373, DOI 10.1016/S0269-7491(99)00216-X
- Schjaer-Jacobsen H., 2009, P 8 WORKSH UNC PROC, P213
- Shin M, 2016, ENER BUILDINGS, V110, P57, DOI 10.1016/j.enbuild.2015.10.035
- SINGER D, 1990, FUZZY SET SYST, V34, P145, DOI 10.1016/0165-0114(90)90154-X
- Thom H., 1952, MON WEA REV, V80, P143, DOI [DOI 10.1175/1520-0493(1952)080<0143:SDSFTU>2.0.CO;2, 10. 1175/1520-0493(1952)080&LT;0143:SDSFTU&GT;2. 0. CO;2]
- Valor E, 2001, J APPL METEOROL, V40, P1413, DOI 10.1175/1520-0450(2001)040<1413:DATAEL>2.0.CO;2
- Verbai Z, 2014, ENERGY, V76, P780, DOI 10.1016/j.energy.2014.08.075

Wang C, 2017, INT J HEAT MASS TRAN, V107, P631, DOI 10.1016/j.ijheatmasstransfer.2016.10.083

Wang LP, 2012, ENERG BUILDINGS, V53, P152, DOI 10.1016/j.enbuild.2012.06.017

Wu D, 2016, FUZZY SET SYST, V293, P30, DOI 10.1016/j.fss.2015.09.011

Zadeh L. A., 1975, SYNTHESE, V30, P407, DOI [10.1007/BF00485052, DOI 10.1007/BF00485052]

Zimmermann H.-J., 2001, FUZZY SET THEORY ITS

NR 52

TC 0

Z9 0

U1 0

U2 0

PU MDPI

PI BASEL

PA ST ALBAN-ANLAGE 66, CH-4052 BASEL, SWITZERLAND

SN 2075-5309

J9 BUILDINGS

JI Buildings

PD FEB

PY 2018

VL 8

IS 2

AR 21

DI 10.3390/buildings8020021

PG 12

WC Construction & Building Technology

SC Construction & Building Technology

GA FZ3SL

UT WOS:000427510600009

OA gold

DA 2018-05-03

ER

PT J

AU Damette, O

Delacote, P

Del Lo, G

AF Damette, Olivier

Delacote, Philippe

Del Lo, Gaye

TI Households energy consumption and transition toward cleaner energy sources

SO ENERGY POLICY

LA English

DT Article

DE Energy consumption; Energy transition; Energy switching; Environmental concern; Dependent qualitative econometrics

ID SELECTION BIAS; DEMAND; MODEL

AB The paper investigates the factors influencing households' energy choices, and the drivers of switching toward cleaner energy. We first present a theoretical framework to determine the factors that explain households' energy consumption and highlight the motivations underlying their transition towards less polluting sources, including their environmental preference. Using French household data from ADEME, we provide an econometric test of qualitative variables following studies by Dubin and McFadden (1984). Our results show that income and prices are the main determinants of household energy consumption. Environmental considerations seem to influence the choice of energy sources more than consumption. We also find evidence that income and relative capital cost are the most important variables for household energy switching.

C1 [Damette, Olivier; Del Lo, Gaye] Univ Lorraine, BETA, CNRS, UMR7522, Nancy Site, Paris, France. [Delacote, Philippe] INRA, AgroParisTech, Lab Forest Econ, Paris, France.

RP Damette, O (reprint author), Univ Lorraine, BETA, CNRS, UMR7522, Nancy Site, Paris, France.



EM olivien.damette@univ-lorraine.fr; philippe.delacote@inra.fr;  
gaye-le.lo@univ-lorraine.fr  
OI delacote, philippe/0000-0002-9888-7193  
FU Region Lorraine; Conseil General 54; ARIANE program  
FX The authors gratefully acknowledge the financial support of Region  
Lorraine, Conseil General 54 and ARIANE program.  
CR ADEME, 2014, PROGR BOIS EN 2000 2  
ADEME, 2016, SE CHAUFF SANS GASP  
ADEME, 2014, CLIM AIR EN  
Belaid F, 2016, ENERG POLICY, V92, P220, DOI 10.1016/j.enpol.2016.02.015  
Bernard JT, 2011, RESOUR ENERGY ECON, V33, P315, DOI 10.1016/j.reseneeco.2010.07.002  
Bernard JT, 1996, CAN J ECON, V29, P92, DOI 10.2307/136153  
Bourguignon F, 2007, J ECON SURV, V21, P174, DOI 10.1111/j.1467-6419.2007.00503.x  
Carter A, 2012, J POLICY MODEL, V34, P242, DOI 10.1016/j.jpolmod.2011.08.006  
Couture S, 2012, ENERG ECON, V34, P1972, DOI 10.1016/j.eneco.2012.08.022  
Dahl GB, 2002, ECONOMETRICA, V70, P2367, DOI 10.1111/1468-0262.00379  
DUBIN JA, 1984, ECONOMETRICA, V52, P345, DOI 10.2307/1911493  
Hache E, 2017, ENERG POLICY, V107, P82, DOI 10.1016/j.enpol.2017.04.038  
HECKMAN JJ, 1979, ECONOMETRICA, V47, P153, DOI 10.2307/1912352  
Husson F., 2015, J STAT SOFTW  
IEA, 2015, EN CLIM CHANG WORLD  
LEE LF, 1983, ECONOMETRICA, V51, P507, DOI 10.2307/1912003  
McFadden D., 1984, HDB ECONOMETRICS, VII  
McFadden D, 1974, J PUBLIC ECON, V3, P303, DOI DOI 10.1016/0047-2727(74)90003-6  
McFadden D, 1973, FRONTIERS ECONOMETRI, P105, DOI DOI 10.1108/EB028592  
Michelsen CC, 2016, ENERG POLICY, V89, P95, DOI 10.1016/j.enpol.2015.11.018  
Nauleau ML, 2014, ENERG ECON, V46, P78, DOI 10.1016/j.eneco.2014.08.011  
Nesbakken R, 2001, SCAND J ECON, V103, P165, DOI 10.1111/1467-9442.00236  
Song NF, 2012, ENERG ECON, V34, P2116, DOI 10.1016/j.eneco.2012.03.004  
Song NF, 2012, ENERG ECON, V34, P389, DOI 10.1016/j.eneco.2011.12.009  
Train K. E., 2003, DISCRETE CHOICE METH  
Vaage K, 2000, ENERG ECON, V22, P649, DOI 10.1016/S0140-9883(00)00053-0  
NR 26  
TC 0  
Z9 0  
U1 2  
U2 2  
PU ELSEVIER SCI LTD  
PI OXFORD  
PA THE BOULEVARD, LANGFORD LANE, KIDLINGTON, OXFORD OX5 1GB, OXON, ENGLAND  
SN 0301-4215  
EI 1873-6777  
J9 ENERG POLICY  
JI Energy Policy  
PD FEB  
PY 2018  
VL 113  
BP 751  
EP 764  
DI 10.1016/j.enpol.2017.10.060  
PG 14  
WC Economics; Energy & Fuels; Environmental Sciences; Environmental Studies  
SC Business & Economics; Energy & Fuels; Environmental Sciences & Ecology  
GA FT2XO  
UT WOS:000423009500070  
DA 2018-05-03  
ER

PT J

AU Das, R

Richman, R

Brown, C

AF Das, Runa

Richman, Russell

Brown, Craig

TI Demographic determinants of Canada's households' adoption of energy efficiency measures: observations from the Households and Environment Survey, 2013

SO ENERGY EFFICIENCY

LA English

DT Article

DE Demographics; Energy efficiency; Technology adoption; Consumer behavior; Discrete choice; Energy consumption

ID RESIDENTIAL CONSERVATION PROGRAMS; HEATING-SYSTEMS; CONSUMPTION; BEHAVIOR; POLICY; PARTICIPATION; ATTITUDES; PATTERNS; MODEL; HOME

AB In addition to a growing and aging population, Canada has experienced large shifts in its residential sector. There are more households, homes are larger with less people in them, and there are more appliances per household, all of which contribute to increased energy consumption. The present work explores the demographic determinants of residential energy efficiency adoption using the 2013 Households and Environment Survey. With binary logistic regressions, we predicted the odds of households adopting three energy-efficient actions: energy-saving lights, programmable thermostats, and changes to a dwelling following an energy audit. Although it was found that Canadian households are participating in energy efficiency, not all groups are participating equally. Similar to previous research, seniors appear to be more inclined to adopt less challenging measures such as energy-saving lights, as opposed to more intensive dwelling upgrades. Additionally, levels of education and income were positively related to the adoption of energy efficiency measures. However, the results showed household income to be less of a contributing factor for decisions regarding dwelling changes compared to the financial incentives offered via government grants. The results suggest a need to increase energy efficiency education and to continue offering financial incentives as the country increases its residential energy efficiency.

C1 [Das, Runa] Royal Rd Univ, Coll Interdisciplinary Studies, 2005 Sooke Rd, Victoria, BC V9B 5Y2, Canada. [Richman, Russell] Ryerson Univ, Dept Architectural Sci, 350 Victoria St, Toronto, ON M5B 2K3, Canada. [Brown, Craig] Univ Waterloo, Sch Environm Enterprise & Dev, 200 Univ Ave W, Waterloo, ON N2L 3G1, Canada.

RP Das, R (reprint author), Royal Rd Univ, Coll Interdisciplinary Studies, 2005 Sooke Rd, Victoria, BC V9B 5Y2, Canada.

EM runa.das@royalroads.ca; richman@ryerson.ca; craig.brown@uwaterloo.ca

CR Abrahamse W, 2011, HUM ECOL REV, V18, P30

Abrahamse W, 2009, J ECON PSYCHOL, V30, P711, DOI 10.1016/j.joep.2009.05.006

Allison P. D., 2014, SAS GLOBAL FORUM

Ameli N, 2015, ENVIRON RES LETT, V10, DOI 10.1088/1748-9326/10/4/044015

Benders RMT, 2006, ENER POLICY, V34, P3612, DOI 10.1016/j.enpol.2005.08.005

BERRY L, 1991, ENER POLICY, V19, P596, DOI 10.1016/0301-4215(91)90039-Q

BERRY LG, 1988, ENER POLICY, V16, P152, DOI 10.1016/0301-4215(88)90122-X

Biesiot W, 1999, ECOL ECON, V28, P367, DOI 10.1016/S0921-8009(98)00113-X

Blackwell R., 2015, GLOBE MAIL

Brounen D, 2013, ENER ECON, V38, P42, DOI 10.1016/j.eneco.2013.02.008

Brown C, 2015, BUILD ENVIRON, V89, P308, DOI 10.1016/j.buildenv.2015.02.039

Brown M. A., 1985, ENERGY SYSTEMS POLIC, V9, P271

CMHC, 2012, HOUS OLD CAN DEF GUI, P1

CMHC, 2008, IMP AG CAN POP HOUS

Fawcett T, 2014, BUILD RES INF, V42, P477, DOI 10.1080/09613218.2013.804769

Frederiks ER, 2015, ENERGIES, V8, P573, DOI 10.3390/en8010573

FRITZSCHE DJ, 1981, J MARKETING RES, V18, P227, DOI 10.2307/3150956

Gantessa SF, 2013, ENER BUILDINGS, V57, P155, DOI 10.1016/j.enbuild.2012.11.006

Gardner GT, 2008, ENVIRONMENT, V50, P12, DOI 10.3200/ENV.50.5.12-25

- Gatersleben B, 2002, ENVIRON BEHAV, V34, P335, DOI 10.1177/0013916502034003004
- Gillingham K, 2012, ENER G J, V33, P37, DOI 10.5547/01956574.33.2.3
- Hicks AL, 2014, ENER G EFFIC, V7, P323, DOI 10.1007/s12053-013-9226-6
- Hoicka CE, 2014, ENER G POLICY, V65, P594, DOI 10.1016/j.enpol.2013.10.053
- Holloway D., 2006, URBAN POLICY RES, V24, P115, DOI [10.1080/08111140600591096, DOI 10.1080/08111140600591096]
- Huebner GM, 2015, APPL ENER G, V159, P589, DOI 10.1016/j.apenergy.2015.09.028
- Jaccard M, 2006, ENVIRON MODEL ASSESS, V11, P91, DOI 10.1007/s10666-005-9036-0
- Macey S. M., 1988, CAN GEOGR, V2, P167
- Mahapatra K, 2008, ENER G POLICY, V36, P577, DOI 10.1016/j.enpol.2007.10.006
- Maller CJ, 2011, URBAN POLICY RES, V29, P59, DOI 10.1080/08111146.2011.539514
- McKenzie-Mohr D., 2011, FOSTERING SUSTAINABL
- Michelsen CC, 2012, ENER G ECON, V34, P1271, DOI 10.1016/j.eneco.2012.06.009
- Mills B, 2012, ENER G POLICY, V49, P616, DOI 10.1016/j.enpol.2012.07.008
- Mills BF, 2010, RESOUR ENER G ECON, V32, P363, DOI 10.1016/j.reseneeco.2009.10.002
- Nair G, 2010, ENER G POLICY, V38, P2956, DOI 10.1016/j.enpol.2010.01.033
- Natural Resources Canada, 2016, EN EFF TRENDS CAN 19
- Pan Y, 2008, EPIDEMIOL INFECT, V136, P421, DOI 10.1017/S095026880700831X
- Peffer T, 2011, BUILD ENVIRON, V46, P2529, DOI 10.1016/j.buildenv.2011.06.002
- Poortinga W, 2003, J ECON PSYCHOL, V24, P49, DOI 10.1016/S0167-4870(02)00154-X
- Rea LM, 2014, DESIGNING CONDUCTING
- Reid L, 2010, PROG HUM GEOG, V34, P309, DOI 10.1177/0309132509346994
- RITCHIE JRB, 1981, J CONSUM RES, V8, P233, DOI 10.1086/208860
- Rogerson P. A., 2001, STAT METHODS GEOGRAP
- Sabia JJ, 2008, RES AGING, V30, P3, DOI 10.1177/0164027507307919
- Santin OG, 2011, ENER G BUILDINGS, V43, P2662, DOI 10.1016/j.enbuild.2011.06.024
- Sardianou E, 2013, RENEW ENER G, V57, P1, DOI 10.1016/j.renene.2013.01.031
- Shove E, 1998, ENER G POLICY, V26, P1105, DOI 10.1016/S0301-4215(98)00065-2
- Statistics Canada, 2011, CENS POP STAT CAN CA
- Stern PC, 2000, J SOC ISSUES, V56, P407, DOI 10.1111/0022-4537.00175
- STERN PC, 1981, AM PSYCHOL, V36, P329, DOI 10.1037/0003-066X.36.4.329
- TONN B, 1986, ENER G, V11, P785, DOI 10.1016/0360-5442(86)90017-4
- VERHAGE BJ, 1980, EUR J MARKETING, V14, P167, DOI 10.1108/EUM0000000004898
- WARRINER GK, 1981, J CONSUM RES, V8, P258, DOI 10.1086/208863
- Wilson C, 2015, ENER G RES SOC SCI, V7, P12, DOI 10.1016/j.erss.2015.03.002

NR 53

TC 0

Z9 0

U1 5

U2 5

PU SPRINGER

PI DORDRECHT

PA VAN GODEWIJCKSTRAAT 30, 3311 GZ DORDRECHT, NETHERLANDS

SN 1570-646X

EI 1570-6478

J9 ENER G EFFIC

JI Energy Effic.

PD FEB

PY 2018

VL 11

IS 2

BP 465

EP 482

DI 10.1007/s12053-017-9578-4

PG 18

WC GREEN &amp; SUSTAINABLE SCIENCE &amp; TECHNOLOGY; Energy &amp; Fuels; Environmental Studies

SC Science &amp; Technology - Other Topics; Energy &amp; Fuels; Environmental

Sciences & Ecology  
 GA FT0HH  
 UT WOS:000422803500010  
 DA 2018-05-03  
 ER

PT J

AU Diaz-Mendez, SE  
 Torres-Rodriguez, AA  
 Abatal, M  
 Soberanis, MAE  
 Bassam, A  
 Pedraza-Basulto, GK

AF Diaz-Mendez, S. E.  
 Torres-Rodriguez, A. A.  
 Abatal, M.  
 Escalante Soberanis, M. A.  
 Bassam, A.  
 Pedraza-Basulto, G. K.

TI Economic, environmental and health co-benefits of the use of advanced control strategies for lighting in buildings of Mexico

SO ENERGY POLICY

LA English

DT Article

DE Environmental and health concerns; Emission Factors and Intake factors; Air pollution; Local and global climate change; Energy saving; Control devices for lighting systems

ID ENERGY SAVINGS; AIR-POLLUTION; CONTROL-SYSTEMS; INTAKE FRACTION; DAYLIGHT; POWER; CITY

AB Merida, Mexico, is a city that spends 17% of its electricity for lighting purposes. This electricity comes from thermal power plants that use fossil fuels. These emit a large amount of particulate matter, around 2.5 micrometers (PM<sub>2.5</sub>), which can penetrate deepest lung parts (alveoli), causing cardiovascular disease. Mexico has a policy (NOM-028-ENER-2010) that establishes the minimum efficiency for lighting in buildings. However, lighting is often used inappropriately (e.g. daytime or when there are no people using them). One solution for this problem is to use control device technology of multiple types (combination of daylight, motion and presence sensors). However, these strategies have not been fully implemented in Mexico, mainly due to the high cost of commercial control devices. This study aims to know the lost co-benefits when control devices are not implemented for lighting cost reduction, such as: energy saving (kw-h/yr), electricity bill reduction (USD/yr), PM<sub>2.5</sub> emission reduction ( $\mu\text{g}/\text{m}^3$ ), cardiovascular death reduction (death/yr) and cardiovascular death cost reduction (USD/yr). For those reasons, it is recommended that energy policy decisions regarding building lighting efficiency include the implementation of control devices. Moreover, such policies should be preceded by research studies focused on detailed device cost, co-benefits and socio-economic analysis.

C1 [Diaz-Mendez, S. E.; Torres-Rodriguez, A. A.; Abatal, M.; Pedraza-Basulto, G. K.] Univ Autonoma Carmen, Fac Ingn, Calle 56 4, Ciudad Del Carmen 24180, Campeche, Mexico.

[Escalante Soberanis, M. A.; Bassam, A.] Univ Autonoma Yucatan, Fac Ingn, Av Ind Contaminantes Perifer Norte, Merida, Yucatan, Mexico.

RP Diaz-Mendez, SE (reprint author), Univ Autonoma Carmen, Fac Ingn, Calle 56 4, Ciudad Del Carmen 24180, Campeche, Mexico.; Bassam, A (reprint author), Univ Autonoma Yucatan, Fac Ingn, Av Ind Contaminantes Perifer Norte, Merida, Yucatan, Mexico.

EM sdiaz@pampano.unacar.mx; baali@correo.uady.mx

CR Abdelaziz EA, 2011, RENEW SUST ENERG REV, V15, P150, DOI 10.1016/j.rser.2010.09.003

Aghemo C, 2014, AUTOMAT CONSTR, V43, P10, DOI 10.1016/j.autcon.2014.02.015

Argyriou I, 2012, SUSTAIN CITIES SOC, V5, P87, DOI 10.1016/j.scs.2012.06.001

Bennett DH, 2002, ENVIRON SCI TECHNOL, V36, p206A, DOI 10.1021/es0222770

Brook RD, 2008, CLIN SCI, V115, P175, DOI 10.1042/CS20070444

CONUEE, 2015, AP ESP QUE CONS MAS

Diaz SE, 2013, ENERG BUILDINGS, V65, P458, DOI 10.1016/j.enbuild.2013.06.028

- Diaz-Mendez SE, 2014, ENER G CONVERS MANAGE, V77, P1, DOI 10.1016/j.enconman.2013.09.033  
Diaz-Mendez SE, 2013, ENERGY, V61, P234, DOI 10.1016/j.energy.2013.09.042  
Diaz-Mendez SE, 2011, J MECH SCI TECHNOL, V25, P1979, DOI 10.1007/s12206-011-0219-0  
Diaz -Mendez S. E., 2012, INT J EXERGY  
DOCKERY DW, 1993, NEW ENGL J MED, V329, P1753, DOI 10.1056/NEJM199312093292401  
Doulos L, 2008, ENER G BUILDINGS, V40, P36, DOI 10.1016/j.enbuild.2007.01.019  
Fernandes LL, 2014, ENER G BUILDINGS, V68, P498, DOI 10.1016/j.enbuild.2013.10.009  
Gong M, 2001, EXERGY, V1, P217  
Hernandez-Escobedo Q, 2015, RENEW SUST ENER G REV, V43, P216, DOI 10.1016/j.rser.2014.10.025  
Hernandez-Escobedo Q, 2010, RENEW SUST ENER G REV, V14, P2830, DOI 10.1016/j.rser.2010.07.019  
Murillo JH, 2012, ATMOS RES, V107, P31, DOI 10.1016/j.atmosres.2011.12.010  
IEA, 2015, EN BAL OCDE COUNTR  
Kampa M, 2008, ENVIRON POLLUT, V151, P362, DOI 10.1016/j.envpol.2007.06.012  
Kleit AN, 2012, ENER G POLICY, V46, P443, DOI 10.1016/j.enpol.2012.04.008  
Li DHW, 2014, ENER G BUILDINGS, V72, P457, DOI 10.1016/j.enbuild.2013.12.027  
Lo Verso VRM, 2014, ENER G BUILDINGS, V76, P151, DOI 10.1016/j.enbuild.2014.02.063  
Lopez MT, 2005, ATMOS ENVIRON, V39, P1199, DOI 10.1016/j.atmosenv.2004.10.035  
Mugica V, 2009, ATMOS ENVIRON, V43, P5068, DOI 10.1016/j.atmosenv.2009.06.051  
Nazari S, 2010, ENERGY, V35, P2992, DOI 10.1016/j.energy.2010.03.035  
Pachauri R. K., 2014, CLIMATE CHANGE SYNTH  
Perez L, 2010, SWISS MED WKLY, V140, DOI 10.4414/sm.w.2010.13129  
Sanchez R., 2015, ESTIMATION EMISSION  
SENER, 2013, BAL NAC EN  
SENER, 2014, EST SECT EL  
Snakin V.V., 2001, SOIL LIQUID PHASE CO  
Soori PK, 2013, ENER G BUILDINGS, V66, P329, DOI 10.1016/j.enbuild.2013.07.039  
Stevens G, 2007, ATMOS ENVIRON, V41, P3672, DOI 10.1016/j.atmosenv.2006.12.051  
Streeter JL, 2016, ENER G POLICY, V90, P16, DOI 10.1016/j.enpol.2015.11.035  
Vallero D. A., 2014, FUNDAMENTALS AIR POL  
van de Meughevel N, 2014, ENER G BUILDINGS, V75, P321, DOI 10.1016/j.enbuild.2014.02.016  
Wall G., 2001, EXERGY INT J, V3, P128  
Wojnicki I, 2014, EXPERT SYST APPL, V41, P999, DOI 10.1016/j.eswa.2013.07.044  
Woodward A., 2014, CLIMATE CHANGE HLTH  
Zhu XiaoMin, 2015, Acta Ecologica Sinica - International Journal, V35, P35

NR 41

TC 0

Z9 0

U1 5

U2 5

PU ELSEVIER SCI LTD

PI OXFORD

PA THE BOULEVARD, LANGFORD LANE, KIDLINGTON, OXFORD OX5 1GB, OXON, ENGLAND

SN 0301-4215

EI 1873-6777

J9 ENER G POLICY

J1 Energy Policy

PD FEB

PY 2018

VL 113

BP 401

EP 409

DI 10.1016/j.enpol.2017.11.028

PG 9

WC Economics; Energy & Fuels; Environmental Sciences; Environmental Studies

SC Business & Economics; Energy & Fuels; Environmental Sciences & Ecology

GA FT2XO

UT WOS:000423009500039

DA 2018-05-03

ER

PT J

AU Djanibekov, U

Gaur, V

AF Djanibekov, Utkur

Gaur, Varun

TI Nexus of energy use, agricultural production, employment and incomes  
among rural households in Uttar Pradesh, India

SO ENERGY POLICY

LA English

DT Article

DE Bioenergy; Heterogeneity; Rural interdependencies; Rural inequality;  
Agricultural household model; Dynamic programming

ID LAND-USE; FOOD SECURITY; EMISSIONS; MODEL; TECHNOLOGIES; BIOENERGY;  
IMPACTS

AB This study analyzes the nexus issues of energy use, agricultural production, income and employment among heterogeneous and interdependent rural households in Uttar Pradesh, India. We use an agricultural household dynamic programming model that includes two types of households differentiated by their socio-economic characteristics and that are linked through agricultural contracts. Households are also differentiated by their membership in terms of men, women and children. The model simulates the effects of policies such as state subsidies for the purchase of solar panels, improvement in non-agricultural employment opportunities, and combinations of the two, as they are suggested to improve energy supply and reduce trade-offs in energy use. The model results indicate that households improve energy use patterns by using solar panels; yet, adoption of such technology is conditional on state subsidy levels of 50% and 80% for the purchase of solar panels for farming and domestic purposes respectively. Subsidies for solar panels together with improvement of off-farm work increases off-farm employment levels and income of the poorer household, however, this policy reduces agricultural production. In addition, the wealthier household incurs losses from improvement in non-agricultural employment opportunities due to reduced labor availability for farm operations.

C1 [Djanibekov, Utkur] Manaaki Whenua Landcare Res, 231 Morrin Rd, Auckland 1072, New Zealand.

[Djanibekov, Utkur] Univ Bonn, Inst Food & Resource Econ ILR, Meckenheimer Allee 174, D-53115 Bonn, Germany.

[Gaur, Varun] Univ Bonn, Ctr Dev Res ZEF, Walter Flex Str 3, D-53113 Bonn, Germany.

RP Djanibekov, U (reprint author), Manaaki Whenua Landcare Res, 231 Morrin Rd, Auckland 1072, New Zealand.

EM djanibekovu@landcareresearch.co.nz; varungaur.engg@gmail.com

FU German Federal Ministry for Economic Cooperation and Development (BMZ)

FX The authors gratefully acknowledge the support for this research from  
the German Federal Ministry for Economic Cooperation and Development  
(BMZ).

CR Allcott H, 2012, J ECON PERSPECT, V26, P3, DOI 10.1257/jep.26.1.3

Arndt C, 2011, WORLD DEV, V39, P1649, DOI 10.1016/j.worlddev.2011.02.012

Bandiera O., 2016, 058 STICERD EOPP

Brown MA, 2001, ENER POLICY, V29, P1197, DOI 10.1016/S0301-4215(01)00067-2

Bryngelsson DK, 2013, ENER POLICY, V55, P454, DOI 10.1016/j.enpol.2012.12.036

Burney J, 2010, P NATL ACAD SCI USA, V107, P1848, DOI 10.1073/pnas.0909678107

Census of India, 2011, HOUS LIST HOUS CENS

Census of India, 2011, HOUS AV SEP KITCH TY

Chen L, 2006, ECOL ECON, V58, P407, DOI 10.1016/j.ecolecon.2005.07.018

del Rio P, 2009, RENEW SUST ENER REV, V13, P1314, DOI 10.1016/j.rser.2008.08.001

Diaz-Rainey I, 2015, ENER POLICY, V82, P105, DOI 10.1016/j.enpol.2015.03.003

Diaz-Rainey I., 2009, P 6 EUR EN MARK EEM

Djanibekov N, 2015, AGR SYST, V141, P1, DOI 10.1016/j.agsy.2015.09.002

Djanibekov U, 2017, ENVIRON DEV ECON, V22, P133, DOI 10.1017/S1355770X16000310

Djanibekov U, 2013, LAND USE POLICY, V35, P95, DOI 10.1016/j.landusepol.2013.05.003

Duflo E., 2008, Surveys and Perspectives Integrating Environment and Society (SAPIENS), V1, P1

FAO, 2012, 1203 FAO ESAE UN

FRED, 2016, INT RAT DISC RAT IND  
 Frondel M, 2010, ENERG POLICY, V38, P4048, DOI 10.1016/j.enpol.2010.03.029  
 GASSON R, 1992, J RURAL STUD, V8, P387, DOI 10.1016/0743-0167(92)90052-8  
 Gebreegzabher Z., 2013, ENV DEV DISCUSSION P  
 Guta DD, 2014, ENERG POLICY, V75, P217, DOI 10.1016/j.enpol.2014.09.017  
 Hiremath RB, 2010, ENERG POLICY, V38, P862, DOI 10.1016/j.enpol.2009.10.037  
 Howells MI, 2005, ENERG POLICY, V33, P1833, DOI 10.1016/j.enpol.2004.02.019  
 IEA, 2013, PEOPL REL TRAD US BI  
 Isaac M, 2009, ENERG POLICY, V37, P507, DOI 10.1016/j.enpol.2008.09.051  
 Jebaraj S, 2006, RENEW SUST ENERG REV, V10, P281, DOI 10.1016/j.rser.2004.09.004  
 Levy P, 2008, SAMPLING POPULATIONS  
 Litman T, 2009, TRANSPORTATION COST  
 Longhi S, 2015, ENERG ECON, V49, P440, DOI 10.1016/j.eneco.2015.03.018  
 Mirzabaev A, 2015, WATER INT, V40, P772, DOI 10.1080/02508060.2015.1048924  
 OTSUKA K, 1992, J ECON LIT, V30, P1965  
 Padilla E, 2006, ENERG POLICY, V34, P1762, DOI 10.1016/j.enpol.2004.12.014  
 Ruben R, 2004, FOOD POLICY, V29, P303, DOI 10.1016/j.foodpol.2004.07.004  
 Scheurlen E., 2015, 01419 IFPRI  
 Singh G., 2014, MIDDLE E J SCI RES, V20, P260  
 Singh I., 1986, AGR HOUSEHOLD MODELS, P335  
 Sovacool BK, 2008, ENERG POLICY, V36, P2950, DOI 10.1016/j.enpol.2008.04.017  
 Thapar S, 2016, RENEW SUST ENERG REV, V66, P487, DOI 10.1016/j.rser.2016.08.025  
 US EPA, 2000, GREENH GAS EM SMALL  
 Veldwisch GJ, 2008, J PEASANT STUD, V35, P424, DOI 10.1080/03066150802340420  
 Villamor GB, 2014, ENVIRON MODELL SOFTW, V61, P151, DOI 10.1016/j.envsoft.2014.07.013  
 Villamor GB, 2014, CURR OPIN ENV SUST, V6, P128, DOI 10.1016/j.cosust.2013.11.015  
 Wang CB, 2016, ENERG POLICY, V93, P187, DOI 10.1016/j.enpol.2016.03.007  
 WHATMORE S, 1991, J RURAL STUD, V7, P71, DOI 10.1016/0743-0167(91)90043-R  
 World Bank, 2016, POP GROWTH ANN  
 Zhao TT, 2012, ENERG POLICY, V47, P291, DOI 10.1016/j.enpol.2012.04.070  
 Zhong F., 2009, EC RES J, V12, P43

NR 48

TC 0

Z9 0

U1 6

U2 6

PU ELSEVIER SCI LTD

PI OXFORD

PA THE BOULEVARD, LANGFORD LANE, KIDLINGTON, OXFORD OX5 1GB, OXON, ENGLAND

SN 0301-4215

EI 1873-6777

J9 ENERG POLICY

JI Energy Policy

PD FEB

PY 2018

VL 113

BP 439

EP 453

DI 10.1016/j.enpol.2017.11.023

PG 15

WC Economics; Energy &amp; Fuels; Environmental Sciences; Environmental Studies

SC Business &amp; Economics; Energy &amp; Fuels; Environmental Sciences &amp; Ecology

GA FT2XO

UT WOS:000423009500043

DA 2018-05-03

ER

PT J

AU Hoicka, CE

Parker, P

AF Hoicka, Christina E.

Parker, Paul

TI Assessing the adoption of the house as a system approach to residential energy efficiency programs

SO ENERGY EFFICIENCY

LA English

DT Article

DE Voluntary programs; Residential energy efficiency evaluations; Energy efficiency retrofits; House as a system

ID SOCIOTECHNICAL SYSTEM; RETROFIT; CONSERVATION; CONSUMPTION; HOMEOWNERS; BUILDINGS; CANADA; IMPROVEMENTS; EMISSIONS; SAVINGS

AB The traditional model of taking single actions when components reach their end of life or provide inadequate service has enabled the residential sector to gradually improve its energy efficiency over time. However, to achieve the large potential reductions in energy consumption and greenhouse gas emissions in residential buildings, a deeper systematic approach is required. The house as a system approach to energy retrofits emphasizes that for the greatest improvements in energy performance, multiple retrofit actions must be taken, and the order is important. This was the core concept in the Canadian residential energy efficiency programs, EnerGuide for Houses (1998-2006) and ecoEnergy (2007-2012). In this study, a systematic analysis of a large dataset that documents 19,552 residential energy evaluations conducted by a single agency in Waterloo, Canada, allows for a more nuanced description of how well the energy retrofit actions taken by participants followed the house as a system approach. The findings are encouraging in that participants did respond to the multiple recommendations given to them by energy advisors. In particular, a higher number of recommendations were associated with households arranging follow-up evaluations and taking more action under the performance-based grant program. However, the results also illustrate that participants frequently did not attend to the retrofits in the combinations associated with the house as a system approach. Insulation to reduce heat losses should have been the first priority in the systemic approach, but was often not upgraded, and the extent or depth of the upgrade was often less than what had been recommended. Furnaces and windows, which should have been upgraded in combination with or after the building envelope, were often upgraded as singular actions, demonstrating the persistence of the traditional model in some households. Time-limited grants do not appear compatible with encouraging the house as a system approach; it appears that staged approaches and careful attention to the building envelope retrofits would allow these programs to promote the house as a system approach to encourage deep retrofits and achieve low-carbon housing.

C1 [Hoicka, Christina E.] York Univ, Fac Environm Studies, Robarts Ctr Canadian Studies, 4700 Keele St, Toronto, ON M3J 1P3, Canada.

[Parker, Paul] Univ Waterloo, Sch Environm Enterprise & Dev, 200 Univ Ave, Waterloo, ON N2L 3G1, Canada.

RP Hoicka, CE (reprint author), York Univ, Fac Environm Studies, Robarts Ctr Canadian Studies, 4700 Keele St, Toronto, ON M3J 1P3, Canada.

EM cehoicka@yorku.ca

FU Social Sciences and Humanities Research Council of Canada; Ontario Graduate Scholarship

FX The authors thank the Residential Energy Efficiency Project staff and partners who supported, delivered, and managed the programs at the local level. Valuable work on related topics by graduate students and other members of the Sustainable Energy Policy group at the University of Waterloo also helped to inform thinking in this area. The Social Sciences and Humanities Research Council of Canada and Ontario Graduate Scholarship provided financial support. Any errors or omissions remain the responsibility of the authors.

CR Attari SZ, 2010, P NATL ACAD SCI USA, V107, P16054, DOI 10.1073/pnas.1001509107

Aydinalp M., 2001, CANADIAN RESIDENTIAL, V3, P7301

Baumgartner C., 2012, ECO ENERGY OFFICE EN

Bird T., 2006, ENERGY EFFICIENCY AU

Building and Development Branch, 2016, MMA SUPPL STAND SB 1

Darby S, 2006, ENER POLICY, V34, P2929, DOI 10.1016/j.enpol.2005.04.013



- Fawcett T, 2014, BUILD RES INF, V42, P477, DOI 10.1080/09613218.2013.804769
- Foulds C, 2014, ENER POLICY, V69, P57, DOI 10.1016/j.enpol.2014.01.015
- Fuller M., 2010, DRIVING DEMAND HOME
- Fung A. S., 2007, P 21 CAN C APPL MECH
- Galvin R, 2014, ENER POLICY, V74, P655, DOI 10.1016/j.enpol.2014.08.013
- Galvin R, 2014, BUILD RES INF, V42, P398, DOI 10.1080/09613218.2014.882738
- Gamtessa S., 2007, UTILIZATION RESIDENT
- Gamtessa SF, 2013, ENER BUILDINGS, V57, P155, DOI 10.1016/j.enbuild.2012.11.006
- GATES RW, 1983, ENER POLICY, V11, P63, DOI 10.1016/0301-4215(83)90007-1
- Gilby D., 2010, LONGITUDINAL STUDY R
- GONZALES MH, 1988, J APPL SOC PSYCHOL, V18, P1049, DOI 10.1111/j.1559-1816.1988.tb01192.x
- Gouldson A, 2015, ENER POLICY, V86, P739, DOI 10.1016/j.enpol.2015.08.012
- Gram-Hanssen K, 2014, RENEW ENER, V61, P136, DOI 10.1016/j.renene.2013.05.004
- Guler B, 2001, INT J ENER RES, V25, P785, DOI 10.1002/er.721
- Harvey LDD, 2009, ENER EFFIC, V2, P139, DOI 10.1007/s12053-009-9041-2
- Hoicka CE, 2014, ENER POLICY, V65, P594, DOI 10.1016/j.enpol.2013.10.053
- Hoicka CE, 2011, INT J ENER RES, V35, P1312, DOI 10.1002/er.1860
- International Energy Agency, 2016, KEY WORLD EN STAT
- International Energy Agency, 2016, CAN EN SYST OV, P2016
- International Energy Agency, 2008, SUPP G8 PLAN ACT
- International Energy Agency, 2012, WORLD EN OUTL 2012
- International Energy Agency, 2012, EN TECHN PERSP
- International Energy Agency, 2016, CAN IND 2014
- JAFFE AB, 1994, ENER POLICY, V22, P804, DOI 10.1016/0301-4215(94)90138-4
- Jermyn D, 2016, ENER BUILDINGS, V116, P522, DOI 10.1016/j.enbuild.2016.01.022
- KEMPTON W, 1982, ENERGY, V7, P817, DOI 10.1016/0360-5442(82)90030-5
- Killip G., 2009, ECEEE SUMMER STUDY P, V77, P77
- Koopmans C. C., 2001, BRIDGING ENERGY EFFI, P57
- Less B., 2015, DEEP ENERGY RETROFIT
- Lovins Amory B, 2004, ENCY ENERGY, V2, P383
- MAGAT WA, 1986, J POLICY ANAL MANAG, V6, P20, DOI 10.2307/3324078
- Mallaband B., 2012, BARRIERS DOMESTIC RE, P10
- Ministry of Municipal Affairs and Housing, 2012, MUN ACT 2001 LOC IMP, P2963
- Murphy L, 2014, ENER POLICY, V65, P398, DOI 10.1016/j.enpol.2013.10.016
- Nair G, 2010, APPL ENER, V87, P2411, DOI 10.1016/j.apenergy.2010.02.004
- Nair G, 2010, ENER POLICY, V38, P2956, DOI 10.1016/j.enpol.2010.01.033
- Natural Resources Canada, 2013, EN EFF TRENDS CAN 19
- Office of Energy Efficiency, 2007, CONS GUID KEEP HEAT
- Office of Energy Efficiency, 2012, CONS GUID KEEP HEAT
- Office of Energy Efficiency, 2010, RES GHG EM EN SOURC
- Ontario Energy Board, 2013, NAT GAS RAT HIST
- Ontario Ministry of Municipal Affairs, 2010, STUD PRESCR REQ EN 8
- Palmer K., 2013, ASSESSING ENERGY EFF, V2, P271
- Parker P., 2012, FINAL REPORT CANADA
- Parker P, 2005, LOCAL ENVIRON, V10, P173, DOI 10.1080/1354983052000330761
- Persram S., 2011, PROPERTY ASSESSED PA
- Region of Waterloo, 2006, CENS B
- Ryan D. L., 2009, EXPLAINING ENERGY SA
- Scott D., 2001, ENVIRONMENTS, V28, P75
- Simpson S, 2016, BUILD RES INF, V44, P97, DOI 10.1080/09613218.2014.996360
- Statistics Canada, 2012, HOUS EN US FUEL TYP
- STERN PC, 1986, EVALUATION REV, V10, P147, DOI 10.1177/0193841X8601000201
- Stern PC, 1999, J CONSUM POLICY, V22, P461, DOI DOI 10.1023/A:1006211709570
- Sunikka-Blank M, 2016, ENERGY RES SOC SCI, V11, P97, DOI 10.1016/j.erss.2015.09.004
- Tohinaka K., 2011, TECHNICAL ASSISTANCE
- UNFCCC, 2014, 1 STEPS SAF FUT INTR
- Urge-Vorsatz D, 2007, BUILD RES INF, V35, P379, DOI 10.1080/09613210701325883
- Vadodaria K., 2010, NETW COMF EN BUID 6, P1

Vergragt PJ, 2012, TECHNOL ANAL STRATEG, V24, P407, DOI 10.1080/09537325.2012.663964

Wigington L., 2010, ACEEE SUMMER STUDY E, P339

Zhao TT, 2012, ENER POLICY, V47, P291, DOI 10.1016/j.enpol.2012.04.070

NR 67

TC 0

Z9 0

U1 6

U2 6

PU SPRINGER

PI DORDRECHT

PA VAN GODEWIJCKSTRAAT 30, 3311 GZ DORDRECHT, NETHERLANDS

SN 1570-646X

EI 1570-6478

J9 ENER EFFIC

JI Energy Effic.

PD FEB

PY 2018

VL 11

IS 2

BP 295

EP 313

DI 10.1007/s12053-017-9564-x

PG 19

WC GREEN & SUSTAINABLE SCIENCE & TECHNOLOGY; Energy & Fuels; Environmental Studies

SC Science & Technology - Other Topics; Energy & Fuels; Environmental Sciences & Ecology

GA FT0HH

UT WOS:000422803500002

DA 2018-05-03

ER

PT J

AU Jia, JJ

Xu, JH

Fan, Y

AF Jia, Jun-Jun

Xu, Jin-Hua

Fan, Ying

TI Public acceptance of household energy-saving measures in Beijing:

Heterogeneous preferences and policy implications

SO ENERGY POLICY

LA English

DT Article

DE Household energy consumption; Energy-saving measures; Heterogeneous preference; Residential sector; Acceptance level

ID ENVIRONMENTAL BEHAVIOR; DECOMPOSITION ANALYSIS; RESIDENTIAL BUILDINGS; CEMENT INDUSTRY; CO2 EMISSIONS; CHINA; CONSERVATION; CONSUMPTION; EFFICIENCY; INTERVENTIONS

AB Residents have different acceptance levels of household energy-saving measures and heterogeneous preferences for energy-saving attributes. Using questionnaire method, this paper studies the residents' acceptance of and preferences for 24 energy-saving measures in Beijing, China. Conjoint and variance analysis are used to examine preferences for attribute levels of energy-saving measures and the heterogeneity in preferences, respectively. The results show that energy-saving measures are relatively highly acceptable overall, while technical energy-saving measures are almost the least acceptable. The energy-saving domain (home versus transport) is the most important attribute that determines the acceptance level. Home and behavioral energy-saving measures are preferred to transport and technical energy-saving measures, respectively. For households living within the fourth Ring Road in Beijing and for

people with high environmental concern, their average acceptance levels of energy saving measures are 65% and 80% higher than those of their counterparts, respectively. Home energy-saving measures are more favored by households without elders over 60 years old, individuals with low educational level, and residents with low environmental concern, compared with their counterparts. Currently, effective policy tools targeting at behavioral energy conservation are scarce. Publicity about energy-saving measures contributes to improving residents' familiarity with these measures and environmental concern. Customized incentive policies are needed.

C1 [Jia, Jun-Jun] Univ Sci & Technol China, Sch Management, Hefei 230026, Anhui, Peoples R China.

[Jia, Jun-Jun; Xu, Jin-Hua] Chinese Acad Sci, Inst Sci & Dev, Ctr Energy & Environm Policy Res, Beijing 100190, Peoples R China.

[Fan, Ying] Beihang Univ, Sch Econ & Management, Beijing 100191, Peoples R China.

RP Xu, JH (reprint author), Chinese Acad Sci, Inst Sci & Dev, Ctr Energy & Environm Policy Res, Beijing 100190, Peoples R China.

EM jiajunjunceep@163.com; xujinhua111@163.com; yfan1123@buaa.edu.cn

FU National Natural Science Foundation of China [71673266, 71690245, 71210005]; External Cooperation Program of the Chinese Academy of Sciences [GJHZ1513]; Dutch Research Council NOW [467-14-023]

FX Supports from the National Natural Science Foundation of China under Grant No. 71673266, 71690245, 71210005 and the External Cooperation Program of the Chinese Academy of Sciences (Grant no. GJHZ1513) and Dutch Research Council NOW (Grant no. 467-14-023) are acknowledged. The authors appreciate the weekly seminars at CEEP in CAS, from where the earlier draft of the paper was improved.

CR Abrahamse W, 2007, J ENVIRON PSYCHOL, V27, P265, DOI 10.1016/j.jenvp.2007.08.002

Allcott H, 2015, AM ECON REV, V105, P2501, DOI 10.1257/aer.20131564

Bamberg S, 2002, J ENVIRON PSYCHOL, V22, P399, DOI 10.1006/jev.2002.0278

Banfi S, 2008, ENERG ECON, V30, P503, DOI 10.1016/j.eneco.2006.06.001

Beijing Bureau of Statistics, 2015, BEIJ STAT YB 2015

Bird S, 2012, ENERG POLICY, V48, P506, DOI 10.1016/j.enpol.2012.05.053

Bureau of energy statistics of National Bureau of Statistics of the People's Republic of China, 2015, CHIN EN STAT YB 2015

Bureau of energy statistics of the national bureau of statistics, 2014, CHIN EN STAT YB 2014

Burgess J, 2008, ENERG POLICY, V36, P4454, DOI 10.1016/j.enpol.2008.09.039

Costa DL, 2013, J EUR ECON ASSOC, V11, P680, DOI 10.1111/jeea.12011

Daamen DDL, 2001, ENVIRON BEHAV, V33, P229, DOI 10.1177/00139160121972963

Darby Sarah, 2006, REV DEFRA LIT METERI, V486, P2006

De Groot JIM, 2009, J SOC PSYCHOL, V149, P425, DOI 10.3200/SOCP.149.4.425-449

DUNLAP RE, 1978, J ENVIRON EDUC, V9, P10, DOI 10.1080/00958964.1978.10801875

Faruqui A, 2010, ENERGY, V35, P1598, DOI 10.1016/j.energy.2009.07.042

Guo F, 2016, RENEW SUST ENER REV, V62, P507, DOI 10.1016/j.rser.2016.04.070

Guo S., 2014, BEIJING VEH, V1, P7

Hargreaves T, 2010, ENERG POLICY, V38, P6111, DOI 10.1016/j.enpol.2010.05.068

Henryson J, 2000, ENERG POLICY, V28, P169, DOI 10.1016/S0301-4215(00)00004-5

International Energy Agency, 2011, WORLD EN OUTL 2011

Jakobsson C, 2002, TRANSPORTATION, V29, P349, DOI 10.1023/A:1016334411457

Jridi O, 2015, ENERG BUILDINGS, V103, P38, DOI 10.1016/j.enbuild.2015.06.013

KATZEV RD, 1983, J ECON PSYCHOL, V3, P267, DOI 10.1016/0167-4870(83)90006-5

KATZEV RD, 1984, J APPL SOC PSYCHOL, V14, P12, DOI 10.1111/j.1559-1816.1984.tb02217.x

Kwak SY, 2010, ENERG POLICY, V38, P673, DOI 10.1016/j.enpol.2009.09.022

Li Jingmei, 2008, J HVAC, V38, P111

Liang J, 2017, SUSTAINABILITY-BASEL, V9, DOI 10.3390/su9081475

Lindenberg S, 2007, J SOC ISSUES, V63, P117, DOI 10.1111/j.1540-4560.2007.00499.x

Liu WL, 2015, APPL ENER, V147, P287, DOI 10.1016/j.apenergy.2015.02.090

LUCE RD, 1964, J MATH PSYCHOL, V1, P1, DOI 10.1016/0022-2496(64)90015-X

Mills B, 2010, ENERG POLICY, V38, P814, DOI 10.1016/j.enpol.2009.10.028

National Bureau of Statistics of the People's Republic of China, 2016, CHIN STAT YB 2016

Nie HG, 2014, APPL ENER, V121, P10, DOI 10.1016/j.apenergy.2014.01.070

Peng BB, 2016, ENERG CONVERS MANAGE, V109, P195, DOI 10.1016/j.enconman.2015.11.064

Poortinga W, 2003, J ECON PSYCHOL, V24, P49, DOI 10.1016/S0167-4870(02)00154-X  
Poortinga W, 2002, ENVIRON BEHAV, V34, P455, DOI 10.1177/00116502034004003  
Price L, 2011, ENERG POLICY, V39, P2165, DOI 10.1016/j.enpol.2011.02.006  
Qiu YM, 2014, ECOL ECON, V107, P216, DOI 10.1016/j.ecolecon.2014.09.002  
Schultz PW, 2007, PSYCHOL SCI, V18, P429, DOI 10.1111/j.1467-9280.2007.01917.x  
Steg L, 2005, J ENVIRON PSYCHOL, V25, P415, DOI 10.1016/j.jenvp.2005.08.003  
Steg L, 2008, ENERG POLICY, V36, P4449, DOI 10.1016/j.enpol.2008.09.027  
Sutherland R. J., 1991, ENERGY J, V12, P15, DOI DOI 10.5547/ISSN0195-6574-EJ-V0L12-N03-3  
Thogersen J., 2007, THREATS QUALITY URBA, P367  
Wang Q., 2015, BUILD ENERGY EFFIC, V35, P12  
Xu JH, 2016, INT J GREENH GAS CON, V44, P199, DOI 10.1016/j.ijggc.2015.11.028  
Xu JH, 2012, ENERG POLICY, V50, P821, DOI 10.1016/j.enpol.2012.08.038  
Xu P., 2014, P 19 HV AC AC ANN M  
Zheng X. Y., 2015, CHINESE HOUSEHOLD EN

NR 48

TC 0

Z9 0

U1 7

U2 7

PU ELSEVIER SCI LTD

PI OXFORD

PA THE BOULEVARD, LANGFORD LANE, KIDLINGTON, OXFORD OX5 1GB, OXON, ENGLAND

SN 0301-4215

EI 1873-6777

J9 ENERG POLICY

J1 Energy Policy

PD FEB

PY 2018

VL 113

BP 487

EP 499

DI 10.1016/j.enpol.2017.11.024

PG 13

WC Economics; Energy & Fuels; Environmental Sciences; Environmental Studies

SC Business & Economics; Energy & Fuels; Environmental Sciences & Ecology

GA FT2XO

UT WOS:000423009500047

DA 2018-05-03

ER

PT J

AU Karunathilake, H

Hewage, K

Sadiq, R

AF Karunathilake, Hirushie

Hewage, Kasun

Sadiq, Rehan

TI Opportunities and challenges in energy demand reduction for Canadian  
residential sector: A review

SO RENEWABLE & SUSTAINABLE ENERGY REVIEWS

LA English

DT Review

DE Energy demand reduction; Residential sector; Energy conservation; Energy  
efficiency; Energy saving; Passive buildings

ID PHASE-CHANGE MATERIALS; GREENHOUSE-GAS EMISSIONS; LIFE-CYCLE ENERGY;  
BUILDING ENERGY; EFFICIENT APPLIANCES; SAVING TECHNOLOGIES; ELECTRICITY  
DEMAND; POLICY INSTRUMENTS; SIDE MANAGEMENT; THERMAL STORAGE

- AB Developing energy independent and sustainable communities has gained a high level of global interest in recent times. The Federal Sustainable Development Strategy for Canada (FSDS) has defined the addressing of climate change and the shrinking of the environmental footprint as priority themes in its sustainable development approach. In the pursuit of planning net-zero to net-positive community energy systems, reducing the energy demand of the residential buildings is the first priority, particularly as the residential sector accounts for 17% of the secondary energy use in Canada. Various technical, behavioural, and policy level interventions are available for reducing residential energy consumption. In this review, demand reduction interventions have been categorised as efficiency, saving and conservation measures. The benefits, limitations and challenges present in adopting those strategies are discussed for various regions in Canada. Even though there is an advanced level of knowledge available on energy demand reduction, the scattered information needs to be brought together to develop a combined and inclusive approach for residential demand management. Collected knowledge will inform decision makers engaged in the design of residential buildings and planning of sustainable communities to identify the interventions which can be implemented in a given locality. This review aims to address the above gaps through a comprehensive review on potential energy demand reduction methods, especially for Canada. The implications of the findings to Canadian residential energy sector as a whole are discussed in the final part of the review.
- C1 [Karunathilake, Hirushie; Hewage, Kasun; Sadiq, Rehan] Univ British Columbia, Sch Engr, Okanagan Campus, 1137 Alumni Ave, Kelowna, BC V1V 1V7, Canada.
- RP Hewage, K (reprint author), Univ British Columbia, Sch Engr, Okanagan Campus, 1137 Alumni Ave, Kelowna, BC V1V 1V7, Canada.
- EM hirushie.karunathilake@alumni.ubc.ca; kasun.hewage@ubc.ca;  
rehan.sadiq@ubc.ca
- CR Acosta I, 2016, APPL ENERG, V168, P493, DOI 10.1016/j.apenergy.2016.02.005  
Acosta I, 2015, RENEW ENERG, V77, P194, DOI 10.1016/j.renene.2014.12.017  
AECOM, 2011, LONG TERM EN PERF EN  
Aksoy UT, 2006, BUILD ENVIRON, V41, P1742, DOI 10.1016/j.buildenv.2005.07.011  
Al-Ghandoor A, 2009, RENEW SUST ENERG REV, V13, P1262, DOI 10.1016/j.rser.2008.09.008  
Arriaga M, 2013, IEEE T SUSTAIN ENERG, V4, P661, DOI 10.1109/TSTE.2012.2234154  
Arvanitis S, 2013, ENVIRON RESOUR ECON, V54, P389, DOI 10.1007/s10640-012-9599-6  
Berardi U, 2013, ENERG POLICY, V60, P520, DOI 10.1016/j.enpol.2013.04.074  
Berry S, 2016, RENEW SUST ENERG REV, V58, P157, DOI 10.1016/j.rser.2015.12.220  
Bossmann T, 2016, RENEW SUST ENERG REV, V57, P1637, DOI 10.1016/j.rser.2015.12.031  
Boudet HS, 2016, ENERG POLICY, V92, P444, DOI 10.1016/j.enpol.2016.02.033  
Bradley P, 2016, ENERG POLICY, V98, P108, DOI 10.1016/j.enpol.2016.07.022  
Bull R, 2012, ENERG BUILDINGS, V50, P103, DOI 10.1016/j.enbuild.2012.03.032  
Campillo J, 2016, ENERGY, V109, P310, DOI 10.1016/j.energy.2016.04.105  
The Canadian Chamber of Commerce, 2015, CLIM CHANG CAN BUS W  
Canadian Passive House Institute, 2012, DES FUND  
Carlisle N, 2009, DEFINITION ZERO NET  
Carlsson-Kanyama A, 2007, ENERG POLICY, V35, P2163, DOI 10.1016/j.enpol.2006.06.018  
Chan HY, 2010, RENEW SUST ENERG REV, V14, P781, DOI 10.1016/j.rser.2009.10.030  
Chen Q, 2014, APPL ENERG, V113, P982, DOI 10.1016/j.apenergy.2013.08.039  
Chen VL, 2015, ENERG POLICY, V77, P164, DOI 10.1016/j.enpol.2014.11.021  
Chen X, 2015, RENEW SUST ENERG REV, V50, P1425, DOI 10.1016/j.rser.2015.06.003  
Community Energy Association, 2008, COMM EN EM PLANN GUI  
Center for Climate and Energy Solutions, 2011, LIGHT EFF  
Darby S, 2006, EFFECTIVENESS FEEDBA  
Davis L. W., 2011, DESIGN IMPLEMENTATIO, P301  
De Boeck L, 2015, RENEW SUST ENERG REV, V52, P960, DOI 10.1016/j.rser.2015.07.037  
du Can SD, 2014, ENERG POLICY, V72, P56, DOI 10.1016/j.enpol.2014.04.035  
Du P, 2014, ENERG POLICY, V75, P206, DOI 10.1016/j.enpol.2014.09.025  
Energy Star, 2007, FIN GUID EN EFF PROG  
Environment Canada, 2015, CAN GREENH GAS INV  
Environment Canada, 2015, GGOV CAN ANN 2030 EM  
Environment Canada, 2014, CAN SEM TRENDS  
Environment and Climate Change Canada, 2015, 2015 PROGR REP FED S  
Felio G, 2009, MODEL FRAMEWORK ASSE  
Fercovic J, 2016, REG SCI URBAN ECON, V60, P96, DOI 10.1016/j.regsciurbeco.2016.06.010

- Filippini M, 2014, ENER POLICY, V69, P73, DOI 10.1016/j.enpol.2014.01.047
- Florides GA, 2002, APPL ENER, V73, P299, DOI 10.1016/S0306-2619(02)00119-8
- FortisBC, 2016, REB OFF
- Frappe-seneclauze T, 2015, EVOLUTION ENERGY EFF
- Gaglia AG, 2007, ENER CONVERS MANAGE, V48, P1160, DOI 10.1016/j.enconman.2006.10.008
- Gaspar R, 2011, ENER POLICY, V39, P7335, DOI 10.1016/j.enpol.2011.08.057
- Glave J, 2013, CANADIAN ENERGY STRA
- Government of Alberta, 2008, ALB 2008 CLIM CHANG
- Government of Canada, 2016, NEW NAT EN COD BUILD
- Government of Manitoba, 2015, MAN CLIM CHANG GREEN
- Government of New Brunswick, 2013, NEW BRUNSW CLIM CHAN
- Government of Newfoundland and Labrador, 2015, STRENGTH RES CLIM CH
- Government of Ontario, 2016, ONT 5 YEAR CLIM CHAN
- Government of Prince Edward Island, 2015, GREENH GAS EM
- Government of Quebec, 2012, QUEB ACT GREEN 2020
- Gyberg P, 2009, ENER POLICY, V37, P2807, DOI 10.1016/j.enpol.2009.03.043
- Haas R, 1998, ENER BUILDINGS, V27, P195, DOI 10.1016/S0378-7788(97)00034-0
- Harney K. R., 2012, WASHINGTON POST
- Harvey LDD, 2009, ENER EFFIC, V2, P139, DOI 10.1007/s12053-009-9041-2
- Heier J, 2015, RENEW SUST ENER REV, V42, P1305, DOI 10.1016/j.rser.2014.11.031
- Hinnells M, 2008, ENER POLICY, V36, P4427, DOI 10.1016/j.enpol.2008.09.029
- IEA, 2013, MOD BUILD EN COD SEC
- IndEco, 2011, CAN EN EFF PROGR STU
- International Energy Agency, 2013, TRACK CLEAN EN PROGR
- International Energy Agency, 2002, DEAL CLIM CHANG POL
- Karunathilake H., 2016, J CLEAN PROD
- Kavousian A, 2015, ENER BUILDINGS, V99, P220, DOI 10.1016/j.enbuild.2015.03.052
- Kelly G, 2012, RENEW SUST ENER REV, V16, P6851, DOI 10.1016/j.rser.2012.08.003
- Kenisarin M, 2016, RENEW SUST ENER REV, V55, P371, DOI 10.1016/j.rser.2015.10.128
- Khudhair AM, 2004, ENER CONVERS MANAGE, V45, P263, DOI 10.1016/S0196-8904(03)00131-6
- Kim HC, 2006, ENER POLICY, V34, P2310, DOI 10.1016/j.enpol.2005.04.004
- Kloepffer W, 2008, INT J LIFE CYCLE ASS, V13, P89, DOI 10.1065/lca2008.02.376
- J Laustsen, 2008, ENERGY EFFICIENCY RE
- Lei JW, 2016, APPL ENER, V162, P207, DOI 10.1016/j.apenergy.2015.10.031
- Letan R, 2003, BUILD ENVIRON, V38, P197, DOI 10.1016/S0360-1323(02)00070-7
- Lewandowski WM, 2014, ENER BUILDINGS, V69, P93, DOI 10.1016/j.enbuild.2013.10.021
- Linden AL, 2006, ENER POLICY, V34, P1918, DOI 10.1016/j.enpol.2005.01.015
- Loi TSA, 2016, ENER POLICY, V98, P735, DOI 10.1016/j.enpol.2016.02.045
- Barozzi Lollini, 2006, BUILD ENVIRON, V41, P1001, DOI [8, DOI 10.1016/J.BUILDENV.2005.11.011]
- Mansilla R, 2007, J INFORMETR, V1, P155, DOI 10.1016/j.joi.2007.01.001
- Marbek Resource Consultants and M.K. Jaccard and associates, 2006, DEM SID MAN POT CAN
- McDiamid M, 2015, CBC NEWS
- Mills B, 2012, ENER POLICY, V49, P616, DOI 10.1016/j.enpol.2012.07.008
- Mills B, 2010, ENER POLICY, V38, P814, DOI 10.1016/j.enpol.2009.10.028
- Morris P, 2015, ENERGY, V84, P63, DOI 10.1016/j.energy.2015.02.019
- Morrissey J, 2011, ENER BUILDINGS, V43, P915, DOI 10.1016/j.enbuild.2010.12.013
- National Energy Board of Canada, 2016, CAN EN FUT 2016 EN S
- National Renewable Energy Laboratory, 2001, EN EFF APPL SEL MAIN
- Natural Resources Canada, 2016, GRANTS FIN INC
- Natural Resources Canada, 2010, SURV HOUS EN US SHEU
- Natural Resources Canada, 2015, CAN EN COD
- Natural Resources Canada, 2015, EN CONS VS EN EFF
- Natural Resources Canada, 2015, CLIM ZONES WIND DOOR
- Natural Resources Canada, 2016, EN EFF TRENDS CAN 19
- Natural Resources Canada, 2015, EN EFF PROD
- Natural Resources Canada, 2011, EN EFF TRENDS CAN 19
- Natural Resources Canada, 2013, CHOOS US APPL ENERGU
- Natural Resources Canada, 2014, EN CONS MAJ HOUS APP, V53

Natural Resources Canada, 2015, EN FACT BOOK 2015 20  
 Nejat P, 2015, RENEW SUST ENERG REV, V43, P843, DOI 10.1016/j.rser.2014.11.066  
 Neves D, 2014, RENEW SUST ENERG REV, V31, P935, DOI 10.1016/j.rser.2013.12.047  
 Newsham GR, 2013, ENERG POLICY, V59, P133, DOI 10.1016/j.enpol.2013.02.030  
 Ng TSK, 2016, INT J LOW-CARBON TEC, V11, P222, DOI 10.1093/ijlct/ctt067  
 Nova Scotia Environment, 2013, AM GREENH GAS AIR QU  
 Ouyang JL, 2009, ENERG BUILDINGS, V41, P711, DOI 10.1016/j.enbuild.2009.02.003  
 Pacheco R, 2012, RENEW SUST ENERG REV, V16, P3559, DOI 10.1016/j.rser.2012.03.045  
 PEIPPO K, 1991, ENERG BUILDINGS, V17, P259, DOI 10.1016/0378-7788(91)90009-R  
 Praene JP, 2012, RENEW SUST ENERG REV, V16, P426, DOI 10.1016/j.rser.2011.08.007  
 Province of British Columbia, 2016, CLIM ACT LEG  
 Public Works and Government Services Canada, 2001, ENV RESP CONSTR REN  
 Rae C, 2012, RENEW SUST ENERG REV, V16, P6497, DOI 10.1016/j.rser.2012.08.002  
 Rosas-Flores JA, 2011, ENERG BUILDINGS, V43, P10, DOI 10.1016/j.enbuild.2010.08.020  
 Ruparathna R, 2016, RENEW SUST ENERG REV, V53, P1032, DOI 10.1016/j.rser.2015.09.084  
 Sadineni SB, 2011, RENEW SUST ENERG REV, V15, P3617, DOI 10.1016/j.rser.2011.07.014  
 Sawin JL, 2009, RENEWABLE REVOLUTION  
 St Denis G, 2009, RENEW SUST ENERG REV, V13, P2088, DOI 10.1016/j.rser.2008.09.030  
 Stastna K., 2015, CBC NEWS  
 Statistics Canada, 2011, HOUS ENV EN US  
 Steg L, 2008, ENERG POLICY, V36, P4449, DOI 10.1016/j.enpol.2008.09.027  
 Stephan A, 2016, APPL ENERG, V161, P445, DOI 10.1016/j.apenergy.2015.10.023  
 Strbac G, 2008, ENERG POLICY, V36, P4419, DOI 10.1016/j.enpol.2008.09.030  
 Swan LG, 2009, RENEW SUST ENERG REV, V13, P1819, DOI 10.1016/j.rser.2008.09.033  
 Timmons D, 2016, ENERG POLICY, V92, P382, DOI 10.1016/j.enpol.2016.02.030  
 Togia A., 2006, INT J EDUC RES, V45, P362, DOI DOI 10.1016/J.IJER.2007.02.001  
 United Nations Development Program-UNDP, 2004, WORLD EN ASS OV 2004  
 UNEP, 2011, LIF CYCL SUST ASS MA  
 [Anonymous], 2015, QUADR TECHN REV 2015  
 U.S. Environmental Protection Agency, 2009, CUST INC EN EFF EL N  
 United States Environmental Protection Agency, 2016, CLIM CHANG BAS INF C  
 United States Environmental Protection Agency (USEPA), 2013, CLIM PROT PATN 2013  
 Vine E, 2001, ENERGY, V26, P1041, DOI 10.1016/S0360-5442(01)00053-6  
 Wang WL, 2013, ENERG BUILDINGS, V64, P218, DOI 10.1016/j.enbuild.2013.05.007  
 Wiel S, 2003, ENERG POLICY, V31, P1403, DOI 10.1016/S0301-4215(02)00199-4  
 Yamamoto Y, 2008, ENERG POLICY, V36, P1679, DOI 10.1016/j.enpol.2008.01.022  
 Young D, 2008, ENERG POLICY, V36, P34, DOI 10.1016/j.enpol.2007.09.011  
 Zeiler W, 2016, SCI TECHNOL BUILT EN, V22, P911, DOI 10.1080/23744731.2016.1187552  
 Zhivov A, 2014, ASHRAE T 1, P114

NR 133

TC 0

Z9 0

U1 22

U2 22

PU PERGAMON-ELSEVIER SCIENCE LTD

PI OXFORD

PA THE BOULEVARD, LANGFORD LANE, KIDLINGTON, OXFORD OX5 1GB, ENGLAND

SN 1364-0321

J9 RENEW SUST ENERG REV

JI Renew. Sust. Energ. Rev.

PD FEB

PY 2018

VL 82

BP 2005

EP 2016

DI 10.1016/j.rser.2017.07.021

PN 3

PG 12

WC GREEN & SUSTAINABLE SCIENCE & TECHNOLOGY; Energy & Fuels

SC Science & Technology - Other Topics; Energy & Fuels

GA FQ7WS

UT WOS:000418574800004

DA 2018-05-03

ER

PT J

AU Ullahl, I

Ahmad, R

Kim, D

AF Ullahl, Israr

Ahmad, Rashid

Kim, DoHyeun

TI A Prediction Mechanism of Energy Consumption in Residential Buildings

Using Hidden Markov Model

SO ENERGIES

LA English

DT Article

DE Internet of Things; energy prediction; smart homes; Hidden Markov Model

ID ARTIFICIAL NEURAL-NETWORKS; ELECTRICAL CONSUMPTION; SYSTEM; MANAGEMENT

AB Internet of Things (IoT) is considered as one of the future disruptive technologies, which has the potential to bring positive change in human lifestyle and uplift living standards. Many IoT-based applications have been designed in various fields, e.g., security, health, education, manufacturing, transportation, etc. IoT has transformed conventional homes into Smart homes. By attaching small IoT devices to various appliances, we cannot only monitor but also control indoor environment as per user demand. Intelligent IoT devices can also be used for optimal energy utilization by operating the associated equipment only when it is needed. In this paper, we have proposed a Hidden Markov Model based algorithm to predict energy consumption in Korean residential buildings using data collected through smart meters. We have used energy consumption data collected from four multi-storied buildings located in Seoul, South Korea for model validation and results analysis. Proposed model prediction results are compared with three well-known prediction algorithms i.e., Support Vector Machine (SVM), Artificial Neural Network (ANN) and Classification and Regression Trees (CART). Comparative analysis shows that our proposed model achieves 2.96% better than ANN results in terms of root mean square error metric, 6.09% better than SVM and 9.03% better than CART results. To further establish and validate prediction results of our proposed model, we have performed temporal granularity analysis. For this purpose, we have evaluated our proposed model for hourly, daily and weekly data aggregation. Prediction accuracy in terms of root mean square error metric for hourly, daily and weekly data is 2.62, 1.54 and 0.46, respectively. This shows that our model prediction accuracy improves for coarse grain data. Higher prediction accuracy gives us confidence to further explore its application in building control systems for achieving better energy efficiency.

C1 [Ullahl, Israr; Kim, DoHyeun] Jeju Natl Univ, Dept Comp Engr, Jeju Si 63243, South Korea.

[Ahmad, Rashid] COMSATS Inst Informat Technol, Dept Comp Sci, Attock Campus 43600, Islamabad, Pakistan.

RP Kim, D (reprint author), Jeju Natl Univ, Dept Comp Engr, Jeju Si 63243, South Korea.

EM israrullahkk@yahoo.com; rashid.ahmad@ciit-attock.edu.pk;

kimdh@jejunu.ac.kr

FU Institute for Information & communications Technology Promotion (IITP) -

Korea government (MSIT) [2017-0-00756]; MSIT (Ministry of Science and

ICT), Korea under the ITRC (Information Technology Research Center)

[IITP-2017-2014-0-00743]

FX This work was supported by Institute for Information & communications Technology Promotion (IITP) grant funded by the Korea government (MSIT) (No. 2017-0-00756, Development of interoperability and management technology of IoT system with heterogeneous ID mechanism), and this research was supported by the MSIT (Ministry of Science and ICT), Korea, under the ITRC (Information Technology Research Center) support program (IITP-2017-2014-0-00743) supervised by the IITP (Institute for



Information & communications Technology Promotion), Any correspondence related to this paper should be addressed to DoHyeun Kim.

- CR Adamopoulou AA, 2016, ENER G BUILDINGS, V110, P229, DOI 10.1016/j.enbuild.2015.10.003
- Ahmad AS, 2014, RENEW SUST ENER G REV, V33, P102, DOI 10.1016/j.rser.2014.01.069
- Ali S, 2016, J INTELL FUZZY SYST, V30, P3399, DOI 10.3233/IFS-152087
- Ali S, 2015, WIRELESS PERS COMMUN, V83, P493, DOI 10.1007/s11277-015-2405-3
- Ali S, 2013, WIRELESS PERS COMMUN, V73, P1439, DOI 10.1007/s11277-013-1259-9
- Amasyali K, 2018, RENEW SUST ENER G REV, V81, P1192, DOI 10.1016/j.rser.2017.04.095
- Bebis G., 1994, IEEE Potentials, V13, P27, DOI 10.1109/45.329294
- BENARD C, 1992, J SOL ENER G-T ASME, V114, P13, DOI 10.1115/1.2929976
- Boser B. E., 1992, Proceedings of the Fifth Annual ACM Workshop on Computational Learning Theory, P144, DOI 10.1145/130385.130401
- Breiman L., 1984, CLASSIFICATION REGRE
- Koby C., 2001, J MACHINE LEARNING R, P265
- Crawley DB, 2008, BUILD ENVIRON, V43, P661, DOI 10.1016/j.buildenv.2006.10.027
- Curtiss PS, 1996, ASHRAE TRAN, V102, P1141
- Edwards RE, 2012, ENER G BUILDINGS, V49, P591, DOI 10.1016/j.enbuild.2012.03.010
- Erickson V L, 2011, Proceedings 2011 10th International Conference on Information Processing in Sensor Networks (IPSN 2010), P258
- Gonzalez AM, 2005, IEEE T POWER SYST, V20, P13, DOI 10.1109/TPWRS.2004.840412
- Goodwin M, 2016, INTEGR COMPUT-AID E, V23, P101, DOI 10.3233/ICA-160510
- Gunn S. R., 1998, ISIS TECH REP, V14, P5
- Hu P, 2007, C IND ELECT APPL, P2253
- Kalogirou S, 1997, P 17 INT C PAR ARCH, P14
- Kalogirou SA, 2006, INT J LOW-CARBON TEC, V1, P201, DOI 10.1093/ijlct/1.3.201
- Karatasou S, 2006, ENER G BUILDINGS, V38, P949, DOI 10.1016/j.enbuild.2005.11.005
- Kim S, 2016, TECHNOL FORECAST SOC, V102, P143, DOI 10.1016/j.techfore.2015.05.007
- Kusiak A, 2010, APPL ENER G, V87, P925, DOI 10.1016/j.apenergy.2009.09.004
- Levermore G. J., 2000, BUILDING ENERGY MANA
- Li KJ, 2011, ENER G BUILDINGS, V43, P2893, DOI 10.1016/j.enbuild.2011.07.010
- Li X, 2011, IEEE COMMUN MAG, V49, P68, DOI 10.1109/MCOM.2011.6069711
- [Anonymous], 2017, MATLAB VERS 9 3 0 R2
- [Anonymous], 2013, MATLAB VERS 8 1 0 R2
- Mueller J. A., 2016, P 3 INT WORKSH NILM
- Olofsson T, 2001, ENER G BUILDINGS, V33, P85, DOI 10.1016/S0378-7788(00)00068-2
- Sammut C., 2010, ENCY MACHINE LEARNIN, P74
- Selin R., 2013, OUTL EN VIEW 2040
- Sethi P, 2017, J ELECTR COMPUT ENG, DOI 10.1155/2017/9324035
- Sieminski A., 2014, ENERGY INFORM ADM EI
- Siroky J, 2011, APPL ENER G, V88, P3079, DOI 10.1016/j.apenergy.2011.03.009
- Trends in Global Energy Efficiency, 2011, TRENDS GLOB EN EFF E
- Wang Z, 2012, APPL ENER G, V99, P247, DOI 10.1016/j.apenergy.2012.05.020
- Zhu Wang, 2010, IECON 2010 - 36th Annual Conference of IEEE Industrial Electronics, P1144, DOI 10.1109/IECON.2010.5675530
- Zia Tehseen, 2011, IECON 2011 - 37th Annual Conference of IEEE Industrial Electronics, P3218, DOI 10.1109/IECON.2011.6119826

NR 40

TC 0

Z9 0

U1 5

U2 5

PU MDPI

PI BASEL

PA ST ALBAN-ANLAGE 66, CH-4052 BASEL, SWITZERLAND

SN 1996-1073

J9 ENERGIES

J1 Energies

PD FEB

PY 2018  
VL 11  
IS 2  
AR 358  
DI 10.3390/en11020358  
PG 20  
WC Energy & Fuels  
SC Energy & Fuels  
GA FY3PY  
UT WOS:000426734600101  
OA gold  
DA 2018-05-03  
ER

PT J  
AU Bertone, E  
Sahin, O  
Stewart, RA  
Zou, PXW  
Alam, M  
Hampson, K  
Blair, E

AF Bertone, Edoardo  
Sahin, Oz  
Stewart, Rodney A.  
Zou, Patrick X. W.  
Alam, Morshed  
Hampson, Keith  
Blair, Evan

TI Role of financial mechanisms for accelerating the rate of water and energy efficiency retrofits in Australian public buildings: Hybrid Bayesian Network and System Dynamics modelling approach

SO APPLIED ENERGY

LA English

DT Article

DE Bayesian Networks; Building retrofitting; Green buildings; System Dynamics; Water-energy nexus

ID CONDITIONED OFFICE BUILDINGS; UNCERTAINTY; CONSUMPTION; BENEFITS; STORAGE

AB In Australia, the government spending on public buildings' energy and water consumption is considerable; however the building energy and water retrofit market potential has been diminished by a number of barriers, especially financial. In contrast, in other advanced economies there are several reported financing strategies that have been shown to accelerate retrofit projects implementation. In this study, a coupled Bayesian Network System Dynamics model was developed with the core aim to assess the likely influence of those novel financing options and procurement procedures on public building retrofit outcomes scenarios in the Australian context. A particular case-study focusing on Australian public hospitals was showcased as an example in this paper. Stakeholder engagement was utilised to estimate likely preferences and to conceptualise causal relationships of model parameters. The scenario modelling showed that a revolving loan fund supporting an energy performance contracting procurement procedure was preferred. Subsequently, the specific features of this preferred framework were optimised to yield the greatest number of viable retrofit projects over the long term. The results indicated that such a financing scheme would lead to substantial abatement of energy and water consumption, as well as carbon emissions. The strategic scenario analysis approach developed herein provides evidence-based support to policy-makers advocating novel financing and procurement models for addressing a government's sustainability agenda in a financially responsible and net-positive manner.

C1 [Bertone, Edoardo; Sahin, Oz; Stewart, Rodney A.] Griffith Univ, Griffith Sch Engr, Parklands Dr, Southport, Qld 4222, Australia.

[Bertone, Edoardo; Sahin, Oz; Stewart, Rodney A.] Griffith Univ, Cities Res Inst, Parklands Dr, Southport, Qld 4222, Australia.

[Zou, Patrick X. W.; Alam, Morshed] Swinburne Univ Technol, Fac Sci Engn & Technol, Ctr Sustainable Infrastruct, Hawthorn, Vic 3122, Australia.

[Zou, Patrick X. W.; Alam, Morshed] Swinburne Univ Technol, Fac Sci Engn & Technol, Dept Civil & Construct Engn, Hawthorn, Vic 3122, Australia.

[Hampson, Keith] Curtin Univ, Sustainable Built Environm Natl Res Ctr, Perth, WA 6102, Australia.

[Blair, Evan] Queensland Dept Housing & Publ Works, Brisbane, Qld 4000, Australia.

RP Bertone, E (reprint author), Griffith Univ, Griffith Sch Engr, Parklands Dr, Southport, Qld 4222, Australia.; Bertone, E (reprint author), Griffith Univ, Cities Res Inst, Parklands Dr, Southport, Qld 4222, Australia.

EM edoardo.bertone@griffithuni.edu.au

RI Krnjajic, Sheela/C-1174-2018; Stewart, Rodney/H-5561-2018

OI Stewart, Rodney/0000-0002-6013-3505; Alam, Morshed/0000-0002-1422-3948

FU Sustainable Built Environment National Research Centre (SBEnrc) based in Australia; Queensland Government (Department of Housing and Public Works); Western Australian Government (Department of Commerce, Building Commission, Sustainable Building and Department of Finance); Aurecon; Swinburne University; Griffith University; Curtin University

FX This research project was supported by the Sustainable Built Environment National Research Centre (SBEnrc) based in Australia. The collaborative industry partners to the project include the Queensland Government (Department of Housing and Public Works), Western Australian Government (Department of Commerce, Building Commission, Sustainable Building and Department of Finance), and Aurecon. Research partners include Swinburne University, Griffith University and Curtin University. We are grateful for the support provided for this project.

CR ABS, 2010, ABS CAT 4660 0 EN WA

AIHW, 2011, AUSTR I HLTH WELF HL, V40

AIHW, 2016, MAN HOSP AR THER

Alam M, 2016, SUSTAINABILITY PUBLI

Ardente F, 2011, RENEW SUST ENERG REV, V15, P460, DOI 10.1016/j.rser.2010.09.022

Beal CD, 2012, ENERG BUILDINGS, V55, P422, DOI 10.1016/j.enbuild.2012.08.004

Beaudequin D, 2016, SCI TOTAL ENVIRON, V541, P1393, DOI 10.1016/j.scitotenv.2015.10.030

Bertone Edoardo, 2016, International Journal of Sustainable Built Environment, V5, P526, DOI 10.1016/j.ijbe.2016.09.004

Bertone E., 2016, 8 INT C ENV MOD SOFT

Bertone E, 2015, 21 INT C MOD SIM MOD

Bertone E, 2016, J CLEAN PROD, V135, P657, DOI 10.1016/j.jclepro.2016.06.158

Beusker E, 2012, BUILD ENVIRON, V49, P324, DOI 10.1016/j.buildenv.2011.08.006

Bryson J., 2004, PUBLIC MANAGEMENT RE, V6, P21, DOI DOI 10.1080/14719030410001675722

CA, 2016, Q UPD AUSTR NAT GREE

Cai BP, 2014, APPL ENERG, V114, P1, DOI 10.1016/j.apenergy.2013.09.043

Chen SH, 2012, ENVIRON MODELL SOFTW, V37, P134, DOI 10.1016/j.envsoft.2012.03.012

Dascalaki E, 2002, BUILD ENVIRON, V37, P557, DOI 10.1016/S0360-1323(02)00002-1

[Anonymous], 2012, BAS EN CONS GREENH G

Diakaki C, 2010, ENERGY, V35, P5483, DOI 10.1016/j.energy.2010.05.012

DIIS, 2016, AUSTR EN UPD 2016

DRET, 2013, EN US AUSTR GOV OP

Fang TT, 2016, APPL ENERG, V179, P544, DOI 10.1016/j.apenergy.2016.06.133

Ford A, 1997, SYST DYNAM REV, V13, P57, DOI 10.1002/(SICI)1099-1727(199721)13:1<57::AID-SDR117>3.3.CO;2-2

GHD, 2006, SCOP STUD INV MEAS I, P191

Government VS, 2016, WAT CONS BENCHM

Gurung TR, 2016, WATER RESOUR MANAG, V30, P4037, DOI 10.1007/s11269-016-1411-x

Heo Y, 2012, ENERG BUILDINGS, V47, P550, DOI 10.1016/j.enbuild.2011.12.029

Kandiah VK, 2016, J WATER RES PLAN MAN, V142, DOI 10.1061/(ASCE)WR.1943-5452.0000696

Kenway SJ, 2013, ENERG BUILDINGS, V58, P378, DOI 10.1016/j.enbuild.2012.08.035

Kumbaroglu G, 2012, ENER G BUILDINGS, V49, P327, DOI 10.1016/j.enbuild.2012.02.022  
Lam JC, 1997, ENER G BUILDINGS, V26, P189, DOI 10.1016/S0378-7788(96)01034-1  
Lam JC, 2010, ENER G CONVERS MANAGE, V51, P2692, DOI 10.1016/j.enconman.2010.06.004  
Marquez L, 2015, 21 INT C MOD SIM GOL  
McGain F, 2010, PROM EUR FRAM CORP S  
Menassa CC, 2011, ENER G BUILDINGS, V43, P3576, DOI 10.1016/j.enbuild.2011.09.030  
Nicholls A, 2015, APPL ENER G, V159, P252, DOI 10.1016/j.apenergy.2015.08.052  
Rhoads J., 2010, LOW CARBON RETROFIT  
Rieger A, 2016, APPL ENER G, V180, P130, DOI 10.1016/j.apenergy.2016.07.105  
M Rogers E., 2010, DIFFUSION INNOVATION  
Rysanek AM, 2013, ENER G BUILDINGS, V57, P324, DOI 10.1016/j.enbuild.2012.10.027  
Saari A, 2012, APPL ENER G, V92, P76, DOI 10.1016/j.apenergy.2011.10.029  
Sahin O, 2016, ENVIRON MODELL SOFTW, V75, P348, DOI 10.1016/j.envsoft.2014.05.018  
Sahin O, 2015, J CLEAN PROD, V88, P160, DOI 10.1016/j.jclepro.2014.05.009  
Santin OG, 2009, ENER G BUILDINGS, V41, P1223, DOI 10.1016/j.enbuild.2009.07.002  
Siddharth V, 2011, ENER G BUILDINGS, V43, P2718, DOI 10.1016/j.enbuild.2011.06.028  
Serman J. D., 2000, BUSINESS DYNAMICS SY  
Talebpour MR, 2014, ALTERN WATER SUPPLY, V25  
USDE, GUID IMPL FOLL UP ID  
Uusitalo L, 2007, ECOL MODEL, V203, P312, DOI 10.1016/j.ecolmodel.2006.11.033  
Vieira AS, 2016, OPTIMISING RESIDENTI  
Walter T, 2016, APPL ENER G, V179, P996, DOI 10.1016/j.apenergy.2016.07.087  
Yang TR, 2016, APPL ENER G, V180, P792, DOI 10.1016/j.apenergy.2016.08.039  
Zafirakis D, 2013, APPL ENER G, V105, P138, DOI 10.1016/j.apenergy.2012.11.073

NR 53

TC 0

Z9 0

U1 15

U2 15

PU ELSEVIER SCI LTD

PI OXFORD

PA THE BOULEVARD, LANGFORD LANE, KIDLINGTON, OXFORD OX5 1GB, OXON, ENGLAND

SN 0306-2619

EI 1872-9118

J9 APPL ENER G

J1 Appl. Energy

PD JAN 15

PY 2018

VL 210

BP 409

EP 419

DI 10.1016/j.apenergy.2017.08.054

PG 11

WC Energy & Fuels; Engineering, Chemical

SC Energy & Fuels; Engineering

GA FS5DF

UT WOS:000419813100032

DA 2018-05-03

ER

PT J

AU Fan, C

Xiao, F

Li, ZD

Wang, JY

AF Fan, Cheng

Xiao, Fu

Li, Zhengdao

Wang, Jiayuan

TI Unsupervised data analytics in mining big building operational data for energy efficiency enhancement: A review

SO ENERGY AND BUILDINGS

LA English

DT Review

DE Unsupervised data mining; Big data; Building operational performance; Building energy management; Building energy efficiency

ID QUANTITATIVE ASSOCIATION RULES; FAULT-DETECTION ANALYSIS; HIDDEN MARKOV-MODELS; KNOWLEDGE DISCOVERY; OCCUPANCY DETECTION; TIME-SERIES; CLUSTERING-ALGORITHM; LOAD DISAGGREGATION; OFFICE BUILDINGS; HVAC SYSTEMS

AB Building operations account for the largest proportion of energy use throughout the building life cycle.

The energy saving potential is considerable taking into account the existence of a wide variety of building operation deficiencies. The advancement in information technologies has made modern buildings to be not only energy-intensive, but also information-intensive. Massive amounts of building operational data, which are in essence the reflection of actual building operating conditions, are available for knowledge discovery. It is very promising to extract potentially useful insights from big building operational data, based on which actionable measures for energy efficiency enhancement are devised.

Data mining is an advanced technology for analyzing big data. It consists of two main types of data analytics, i.e., supervised and unsupervised analytics. Despite of the power of supervised analytics in predictive modeling, unsupervised analytics are more practical and promising in discovering novel knowledge given limited prior knowledge. This paper provides a comprehensive review on the current utilization of unsupervised data analytics in mining massive building operational data. The commonly used unsupervised analytics are summarized according to their knowledge representations and applications. The challenges and opportunities are elaborated as guidance for future research in this multi-disciplinary field. (C) 2017 Elsevier B.V. All rights reserved.

C1 [Fan, Cheng; Li, Zhengdao; Wang, Jiayuan] Shenzhen Univ, Dept Construct Management & Real Estate, Shenzhen, Peoples R China.

[Xiao, Fu] Hong Kong Polytech Univ, Dept Bldg Serv Engn, Kowloon, Hong Kong, Peoples R China.

RP Fan, C; Li, ZD (reprint author), Shenzhen Univ, Dept Construct Management & Real Estate, Shenzhen, Peoples R China.

EM fancheng@szu.edu.cn; clydelee718@gmail.com

FU National Nature Science Foundation of China [71772125]; Natural Science Foundation of SZU [2017061]; Research Grant Council (RGC) of the Hong Kong SAR [152181/14E]

FX The authors gratefully acknowledge the support of this research by the National Nature Science Foundation of China (Grant No. 71772125), the Natural Science Foundation of SZU (grant no. 2017061) and the Research Grant Council (RGC) of the Hong Kong SAR (152181/14E).

CR Adhikary D, 2015, 2015 IEEE 2ND INTERNATIONAL CONFERENCE ON RECENT TRENDS IN INFORMATION SYSTEMS (RETIS), P126, DOI 10.1109/ReTIS.2015.7232865

Aiad M, 2016, ENERGBUILDINGS, V130, P131, DOI 10.1016/j.enbuild.2016.08.050

Aiad M, 2016, ENERGBUILDINGS, V116, P96, DOI 10.1016/j.enbuild.2015.12.043

Garcia-Escudero LA, 2010, ADV DATA ANAL CLASSI, V4, P89, DOI 10.1007/s11634-010-0064-5

Araya DB, 2017, ENERGBUILDINGS, V144, P191, DOI 10.1016/j.enbuild.2017.02.058

Benezeth Y, 2011, ENERGBUILDINGS, V43, P305, DOI 10.1016/j.enbuild.2010.09.014

Cabrera DFM, 2013, ENERGBUILDINGS, V62, P210, DOI 10.1016/j.enbuild.2013.02.049

Candanedo LM, 2017, ENERGBUILDINGS, V148, P327, DOI 10.1016/j.enbuild.2017.05.031

Capozzoli A, 2017, SUSTAIN CITIES SOC, V35, P191, DOI 10.1016/j.scs.2017.07.016

Capozzoli A, 2015, EXPERT SYST APPL, V42, P4324, DOI 10.1016/j.eswa.2015.01.010

Keogh E., 2003, P 9 ACM SIGKDD INT C, P493

Cook DJ, 2000, IEEE INTELL SYST APP, V15, P32, DOI 10.1109/5254.850825

D'Oca S, 2014, BUILD ENVIRON, V82, P726, DOI 10.1016/j.buildenv.2014.10.021

Di-Jorio L, 2009, LECT NOTES COMPUT SC, V5772, P297, DOI 10.1007/978-3-642-03915-7\_26

Fan C, 2015, ENERGBUILDINGS, V109, P75, DOI 10.1016/j.enbuild.2015.09.060

Fan C, 2015, AUTOMAT CONSTR, V50, P81, DOI 10.1016/j.autcon.2014.12.006

Fan C, 2014, APPL ENERGBUILDINGS, V127, P1, DOI 10.1016/j.apenergy.2014.04.016

- Figueiredo V, 2005, IEEE T POWER SYST, V20, P596, DOI 10.1109/TPWRS.2005.846234
- Fournier-Viger P, 2015, IEEE T KNOWL DATA EN, V27, P2203, DOI 10.1109/TKDE.2015.2405509
- Fournier-Viger P, 2014, J MACH LEARN RES, V15, P3389
- Fu TC, 2011, ENG APPL ARTIF INTEL, V24, P164, DOI 10.1016/j.engappai.2010.09.007
- Gaitani N, 2010, APPL ENERG, V87, P2079, DOI 10.1016/j.apenergy.2009.12.007
- Goldstein M, 2016, PLOS ONE, V11, DOI 10.1371/journal.pone.0152173
- Han J, 2012, MOR KAUF D, P1
- Han JW, 2007, DATA MIN KNOWL DISC, V15, P55, DOI 10.1007/s10618-006-0059-1
- Hong TZ, 2017, BUILD ENVIRON, V114, P518, DOI 10.1016/j.buildenv.2016.12.006
- Howard P, 2016, ASHRAE TRAN, V122, P422
- Hsu D, 2015, APPL ENERG, V160, P153, DOI 10.1016/j.apenergy.2015.08.126
- Hullermeier E., 2002, Principles of Data Mining and Knowledge Discovery. 6th European Conference, PKDD 2002. Proceedings (Lecture Notes in Artificial Intelligence Vol.2431), P200
- IEA (International Energy Agency), 2013, TRANS SUST BUILD STR
- Iglesias F, 2013, ENERGIES, V6, P579, DOI 10.3390/en6020579
- Jain AK, 1999, ACM COMPUT SURV, V31, P264, DOI 10.1145/331499.331504
- Jakkula V, 2010, 2010 6th International Conference on Intelligent Environments (IE), P29, DOI 10.1109/IE.2010.13
- Jalori S., 2015, ASHRAE T, V121, P33
- Jalori S., 2015, ASHRAE T, V121, P156
- Jia MD, 2017, RENEW SUST ENERG REV, V68, P525, DOI 10.1016/j.rser.2016.10.011
- Jota PRS, 2011, INT J ELEC POWER, V33, P1498, DOI 10.1016/j.ijepes.2011.06.034
- Kalluri B, 2016, ENERG BUILDINGS, V127, P399, DOI 10.1016/j.enbuild.2016.05.076
- Khan I, 2013, ENRGY PROCED, V42, P557, DOI 10.1016/j.egypro.2013.11.057
- Kotsiantis S., 2006, GESTS INT T COMPUTER, V32, P71
- Kriegel HP, 2009, ACM T KNOWL DISCOV D, V3, DOI 10.1145/1497577.1497578
- Kriegel HP, 2009, LECT NOTES ARTIF INT, V5476, P831, DOI 10.1007/978-3-642-01307-2\_86
- Kriegel H.-P., 2008, KDD, P444, DOI DOI 10.1145/1401890.1401946.
- Kriegel H.P., 2017, TUT 2010 SIAM INT C
- Laurent A, 2015, ADV INTEL SYS RES, V89, P1644
- Lavin A, 2015, ENERG EFFIC, V8, P681, DOI 10.1007/s12053-014-9316-0
- Lazarevic A., 2005, P 11 ACM SIGKDD INT, P444
- Li GN, 2017, APPL ENERG, V185, P846, DOI 10.1016/j.apenergy.2016.10.091
- Li MC, 2017, ENERG BUILDINGS, V140, P305, DOI 10.1016/j.enbuild.2017.02.006
- Li XL, 2010, IEEE T IND ELECTRON, V57, P3639, DOI 10.1109/TIE.2009.2027926
- Lian W, 2005, COMPUT MATH APPL, V50, P471, DOI 10.1016/j.camwa.2005.03.009
- Lin GJ, 2015, ENERG BUILDINGS, V93, P110, DOI 10.1016/j.enbuild.2015.02.013
- Lin J, 2007, DATA MIN KNOWL DISC, V15, P107, DOI 10.1007/s10618-007-0064-z
- Mann A.K., 2013, GLOBAL J COMPUT SCI, V13
- Miller C., 2017, RENEW SUSTAIN ENERGY
- Miller C, 2015, AUTOMAT CONSTR, V49, P1, DOI 10.1016/j.autcon.2014.09.004
- Minnen David, 2007, AAAI, V1, P615
- Mirakhorli A, 2016, ENERG BUILDINGS, V129, P499, DOI 10.1016/j.enbuild.2016.07.036
- Molina-Solana M, 2017, RENEW SUST ENERG REV, V70, P598, DOI 10.1016/j.rser.2016.11.132
- Parson O, 2014, ARTIF INTELL, V217, P1, DOI 10.1016/j.artint.2014.07.010
- Patnaik D, 2011, ACM T INTEL SYST TEC, V2, DOI 10.1145/1989734.1989738
- Patnaik D, 2009, KDD-09: 15TH ACM SIGKDD CONFERENCE ON KNOWLEDGE DISCOVERY AND DATA MINING, P1305
- Pena M, 2016, EXPERT SYST APPL, V56, P242, DOI 10.1016/j.eswa.2016.03.002
- Perez-Lombard L, 2008, ENERG BUILDINGS, V40, P394, DOI 10.1016/j.enbuild.2007.03.007
- Radovanovic M., 2008, NOVI SAD J MATH, V38, P227
- Ramesh T, 2010, ENERG BUILDINGS, V42, P1592, DOI 10.1016/j.enbuild.2010.05.007
- Ren XX, 2015, BUILD ENVIRON, V89, P1, DOI 10.1016/j.buildenv.2015.02.009
- Rendon E., 2011, INT J COMP COMMUN, V5, P27
- Salleb-Aouissi A, 2013, J MACH LEARN RES, V14, P3153
- Seem JE, 2007, ENERG BUILDINGS, V39, P52, DOI 10.1016/j.enbuild.2006.03.033
- Shao H., 2013, TEMPORAL MOTIF MININ
- Shih HC, 2014, ENERG BUILDINGS, V77, P270, DOI 10.1016/j.enbuild.2014.03.069

Sivic J., 2004, P IEEE COMP SOC C CO  
Tanaka Y, 2005, MACH LEARN, V58, P269, DOI 10.1007/s10994-005-5829-2  
Tang F, 2014, ENERGBUILDINGS, V82, P310, DOI 10.1016/j.enbuild.2014.07.037  
Ulmeanu AP, 2017, ENERGBUILDINGS, V154, P127, DOI 10.1016/j.enbuild.2017.08.036  
Vahdatpour A, 2009, 21ST INTERNATIONAL JOINT CONFERENCE ON ARTIFICIAL INTELLIGENCE (IJCAI-09), PROCEEDINGS, P1261  
Vale Z.A., 2009, IEEE TRANSM DISTR C  
Vega-Pons S, 2011, INT J PATTERN RECOGN, V25, P337, DOI 10.1142/S0218001411008683  
Waide P., 2013, FINAL REPORT EUROPEA  
Walfish S., 2006, PHARM TECHNOL, V30, P82  
Wall J, 2011, ASHRAE TRAN, V117, P449  
Wang Y, 2017, BUILD ENVIRON, V114, P106, DOI 10.1016/j.buildenv.2016.12.015  
Xiao F, 2014, ENERGBUILDINGS, V75, P109, DOI 10.1016/j.enbuild.2014.02.005  
Xu R, 2005, IEEE T NEURAL NETWORK, V16, P645, DOI 10.1109/TNN.2005.845141  
Xue PN, 2017, APPL ENERGBUILDINGS, V205, P926, DOI 10.1016/j.apenergy.2017.08.035  
Yan D, 2015, ENERGBUILDINGS, V107, P264, DOI 10.1016/j.enbuild.2015.08.032  
Yang JJ, 2017, ENERGBUILDINGS, V146, P27, DOI 10.1016/j.enbuild.2017.03.071  
Yang JJ, 2016, ENERGBUILDINGS, V121, P344, DOI 10.1016/j.enbuild.2015.12.019  
Yu FW, 2012, INT J THERM SCI, V53, P148, DOI 10.1016/j.ijthermalsci.2011.10.009  
Yu FW, 2012, ENERGBUILDINGS, V44, P104, DOI 10.1016/j.enbuild.2011.10.026  
Yu Z, 2015, ENERGBUILDINGS, V78, P591, DOI 10.1016/j.enbuild.2015.11.024  
Yu Z, 2011, ENERGBUILDINGS, V43, P1409, DOI 10.1016/j.enbuild.2011.02.002  
Yu Z, 2012, ENERGBUILDINGS, V47, P430, DOI 10.1016/j.enbuild.2011.12.018  
Zheng H, 2014, IEEE INT FUZZY SYST, P396, DOI 10.1109/FUZZ-IEEE.2014.6891735  
Zimek A., 2013, 19 ACM SIGKDD INT C, P428, DOI 10.1145/2487575.2487676  
Zou JH, 2017, ENERGBUILDINGS, V152, P385, DOI 10.1016/j.enbuild.2017.07.064

NR 97

TC 0

Z9 0

U1 8

U2 8

PU ELSEVIER SCIENCE SA

PI LAUSANNE

PA PO BOX 564, 1001 LAUSANNE, SWITZERLAND

SN 0378-7788

EI 1872-6178

J9 ENERGBUILDINGS

J1 Energy Build.

PD JAN 15

PY 2018

VL 159

BP 296

EP 308

DI 10.1016/j.enbuild.2017.11.008

PG 13

WC Construction & Building Technology; Energy & Fuels; Engineering, Civil

SC Construction & Building Technology; Energy & Fuels; Engineering

GA FT2XB

UT WOS:000423008200023

DA 2018-05-03

ER

PT J

AU Castaldo, VL

Pisello, AL

AF Castaldo, Veronica Lucia

Pisello, Anna Laura

TI Uses of dynamic simulation to predict thermal-energy performance of

buildings and districts: a review

SO WILEY INTERDISCIPLINARY REVIEWS-ENERGY AND ENVIRONMENT

LA English

DT Review

ID LIFE-CYCLE ASSESSMENT; STRATEGY PLANNING-MODELS; MEDITERRANEAN CLIMATE;  
OCCUPANT BEHAVIOR; MULTIOBJECTIVE OPTIMIZATION; RESIDENTIAL BUILDINGS;  
SENSITIVITY-ANALYSIS; NATURAL VENTILATION; DESIGN OPTIMIZATION;  
APARTMENT BUILDINGS

AB The design of sustainable constructions also resilient to climate change has become a challenging issue given the increasing greenhouse emissions rate imputable to the built environment in urban areas. In this context, dynamic simulation models represent a suitable tool to support the design from very preliminary phases, since they allow an accurate prediction of the constructions requirements, their environmental performance, and indoor comfort conditions for their occupants. Therefore, starting from specific inputs, that is, weather conditions, construction technologies, materials, energy systems, operation settings, occupancy, and so forth, it is possible to estimate the realistic building energy performance. Moreover, the calibration procedures allow making the model even more representative of the field conditions of a construction. Given the massive progress carried out by the scientific community during the last decades, this paper presents a comprehensive review of the different building dynamic simulation approaches and available tools. While previous review studies focused on single separated aspects of dynamic simulations approaches, that is, calibration methods, software, simulation of single building energy systems, the aim of the present review is to propose a more holistic approach by investigating the recent scientific progress in simulating realistic dense urban environments. In this view, the review focus bridges the gap between the simulation at single-building level and simulation at the increasingly important neighborhood scale by showing the multiple benefits deriving from using dynamic simulation tools at district level, for a more reliable investigation of building performance in their urban context, where more than 50% of the global population worldwide currently lives. (C) 2017 Wiley Periodicals, Inc.

C1 [Castaldo, Veronica Lucia] Univ Perugia, CIRIAF Interunivers Res Ctr Pollut & Environm Mau, Dept Engn, Perugia, Italy.

[Pisello, Anna Laura] Univ Perugia, Dept Engn, Perugia, Italy.

RP Pisello, AL (reprint author), Univ Perugia, Dept Engn, Perugia, Italy.

EM anna.pisello@unipg.it

FU UNESCO Chair 'Water Resources Management and Culture'

FX A.L. Pisello's acknowledgments are due to the UNESCO Chair 'Water Resources Management and Culture,' for supporting her research.

CR Abanda FH, 2016, ENERGY, V97, P517, DOI 10.1016/j.energy.2015.12.135

Abbas M, 1993, THESIS

Abdullah GF, 2016, ENRGY PROCED, V91, P681, DOI 10.1016/j.egypro.2016.06.231

Abu-Hijleh B, 2017, ENER EFFIC, V10, P249, DOI 10.1007/s12053-016-9451-x

Adamski M, 2007, BUILD ENVIRON, V42, P1632, DOI 10.1016/j.buildenv.2006.02.004

AKBARI H, 1995, ENERGY, V20, P1291, DOI 10.1016/0360-5442(95)00033-D

Akbari H, 1988, ASHRAE T, V94

Ali AAM, 2013, ALEX ENG J, V52, P787, DOI 10.1016/j.aej.2013.09.008

Alibabaei N, 2017, APPL ENER, V185, P29, DOI 10.1016/j.apenergy.2016.10.062

Alibabaei N, 2016, ENER BUILDINGS, V128, P81, DOI 10.1016/j.enbuild.2016.05.084

Allegrini J, 2015, RENEW SUST ENER REV, V52, P1391, DOI 10.1016/j.rser.2015.07.123

Armstrong PR, 2006, PNNL15746

Arteconi A, 2017, APPL ENER, V185, P1984, DOI 10.1016/j.apenergy.2016.01.025

Ascione F, 2015, J PHYS C SER, V655, P116

Ascione F, 2016, APPL ENER, V183, P938, DOI 10.1016/j.apenergy.2016.09.027

Aurelie F, 2013, RENEW SUST ENER REV, V32, P272

Azari R, 2016, ENER BUILDINGS, V126, P524, DOI 10.1016/j.enbuild.2016.05.054

Baetens R, 2012, APPL ENER, V96, P74, DOI 10.1016/j.apenergy.2011.12.098

Batueva E, 2015, EWORK AND EBUSINESS IN ARCHITECTURE, ENGINEERING AND CONSTRUCTION 2014, P197

Becchio C, 2016, ENER BUILDINGS, V127, P590, DOI 10.1016/j.enbuild.2016.05.093

Ben-Nakhi AE, 2002, APPL ENER, V73, P5, DOI 10.1111/1467-8292.00184

Bernard C., 1982, ASME J SOLAR ENERGY, V114, P13

Bertagnolio S, 2008, P 3 NAT C IBPSA US B



- Birk W, 2016, 7 IEEE INT C SMART G, P38
- Bjorsell N, 1999, P 6 IPBSA C KYOT JAP
- Bou-Saada TE, 1995, P 5 INT IBPSA C MONT
- Braun JE, 2002, HVAC&R RES, V8, P73, DOI 10.1080/10789669.2002.10391290
- Bronson DJ, 1992, P ASHRAE WINT M AN C, P636
- Bucking S, 2014, J BUILD PERFORM SIMU, V7, P411, DOI 10.1080/19401493.2013.863383
- Buratti C, 2013, BUILD ENVIRON, V594, P82
- Buratti C, 2015, ENRGY PROCED, V82, P480, DOI 10.1016/j.egypro.2015.11.848
- Cao F, 2017, RENEW ENRG, V103, P708, DOI 10.1016/j.renene.2016.11.004
- Capeluto IG, 2001, SOL ENERGY, V70, P275, DOI 10.1016/S0038-092X(00)00088-8
- Castro-Lacouture D, 2009, BUILD ENVIRON, V44, P1162, DOI 10.1016/j.buildenv.2008.08.009
- CHO SH, 1995, ENERGY, V20, P1225, DOI 10.1016/0360-5442(95)00074-Q
- Christensen C, 2006, NRELTP55039929 U COL
- Ciampi M, 2003, SOL ENERGY, V75, P491, DOI 10.1016/j.solener.2003.09.010
- CLARKE JA, 1993, ASHRAE TRAN, V99, P917
- Clarke J. A., 2001, ENERGY SIMULATION BU
- Coackley D, THESIS
- COAKLEY D, 2014, SUSTAIN ENERGY REV, V37, P123, DOI DOI 10.1016/J.RSER.2014.05.007
- Colmenar-Santos A, 2013, ENRG BUILDINGS, V56, P66, DOI 10.1016/j.enbuild.2012.10.004
- Crawley DB, 2001, ENRG BUILDINGS, V33, P319, DOI 10.1016/S0378-7788(00)00114-6
- Crawley DB, 2008, BUILD ENVIRON, V43, P661, DOI 10.1016/j.buildenv.2006.10.027
- Dahanayake KWDC, 2017, ENRG BUILDINGS, V138, P47, DOI 10.1016/j.enbuild.2016.12.002
- Dalla Rosa A, 2011, ENERGY, V36, P6890, DOI 10.1016/j.energy.2011.10.001
- DCRUZ NA, 1987, BUILD ENVIRON, V22, P167, DOI 10.1016/0360-1323(87)90005-9
- Defraeye T, 2012, J WIND ENG IND AEROD, V104, P439, DOI 10.1016/j.jweia.2012.02.001
- Dixon RK, 2010, ENRG POLICY, V38, P6398, DOI 10.1016/j.enpol.2010.01.038
- Dounis AI, 2010, ADV BUILD ENERGY RES, V4, P267, DOI 10.3763/aber.2009.0408
- Duerr S, 2017, IEEE T IND APPL, V53, P402, DOI 10.1109/TIA.2016.2611667
- Annual Energy Review US Energy Information Administration, 2012, ANN EN REV ESRU, 1974, ESP R
- Evins R, 2013, RENEW SUST ENRG REV, V22, P230, DOI 10.1016/j.rser.2013.02.004
- Falke T, 2016, APPL ENRG, V184, P1508, DOI 10.1016/j.apenergy.2016.03.044
- Fang P, 2016, 8 INT C INT HUM MACH
- Ferreira PM, 2012, ENRG BUILDINGS, V55, P238, DOI 10.1016/j.enbuild.2012.08.002
- FISHBONE LG, 1981, INT J ENRG RES, V5, P353, DOI 10.1002/er.4440050406
- Fraisse G, 2002, ENRG BUILDINGS, V34, P1017, DOI 10.1016/S0378-7788(02)00019-1
- Fuchs M, 2016, ENERGY, V117, P478, DOI 10.1016/j.energy.2016.04.023
- Fumo N, 2014, RENEW SUST ENRG REV, V31, P53, DOI 10.1016/j.rser.2013.11.040
- Gallo A, 2014, ENRGY PROCED, V48, P828, DOI 10.1016/j.egypro.2014.02.096
- Gan GH, 2017, RENEW ENRG, V103, P361, DOI 10.1016/j.renene.2016.11.052
- Gaspari J, 2016, CESB 2016 CENTRAL EU, P521
- Gayesky NT, 2012, HVACR RES, V18, P1
- Gayesky NT, 2011, ASHRAE T, V11, P7
- Goldsworthy MJ, 2017, ENRG BUILDINGS, V135, P176, DOI 10.1016/j.enbuild.2016.11.046
- Gouda M. M., 2000, Proceedings of the Chartered Institution of Building Services Engineers A (Building Services Engineering Research and Technology), V21, P199
- Gouda M.M., 2001, BUILD SERV ENG RES T, V22, P237
- Guarino F, 2016, ENRGY PROCED, V101, P360, DOI 10.1016/j.egypro.2016.11.046
- Guillemin A, 2001, ENRG BUILDINGS, V33, P477, DOI 10.1016/S0378-7788(00)00100-6
- Gupta R, 2013, BUILDING SIMULATION 2013: 13TH INTERNATIONAL CONFERENCE OF THE INTERNATIONAL BUILDING PERFORMANCE SIMULATION ASSOCIATION, P2503
- Haberl JS, 1998, J SOL ENRG-T ASME, V120, P193, DOI 10.1115/1.2888069
- Halim NHA, 2012, APPL MECH MATER, V209-211, P1766, DOI 10.4028/www.scientific.net/AMM.209-211.1766
- Hammad F, 2010, ENRG BUILDINGS, V42, P1888, DOI 10.1016/j.enbuild.2010.05.024
- HAN Y, 2015, PROCEDIA ENG, V118, P760, DOI DOI 10.1016/J.PROENG.2015.08.511
- Han ZW, 2017, APPL THERM ENG, V116, P292, DOI 10.1016/j.applthermaleng.2017.01.057
- Harish VSKV, 2016, RENEW SUST ENRG REV, V56, P1272, DOI 10.1016/j.rser.2015.12.040

- Haugaard P, 2003, INVESTIGATION IMPLEM
- He J, 2009, APPL ENERG, V86, P1596, DOI 10.1016/j.apenergy.2008.12.034
- Hellstrom G., 1994, P CALORSTOCK, V94, P195
- Neto AH, 2008, ENERGBUILDINGS, V40, P2169, DOI 10.1016/j.enbuild.2008.06.013
- Hillary J, 2017, ENERGY, V125, P211, DOI 10.1016/j.energy.2017.02.127
- Hilliaho K, 2016, J BUILD ENG, V7, P246, DOI 10.1016/j.job.2016.07.004
- Hong TZ, 2017, BUILD ENVIRON, V114, P518, DOI 10.1016/j.buildenv.2016.12.006
- Hopfe C., 2005, BUILDING PERFORMANCE, P1
- Huang Z, REAL TIME DATA ENERGBUILDINGS
- International Energy Agency, 2007, INT STAND DEV PROM E, P5
- Jennings M, 2014, ENERGY, V64, P220, DOI 10.1016/j.energy.2013.10.076
- Ji J, 2014, INT J LOW-CARBON TEC, V9, P109, DOI 10.1093/ijlct/ctu011
- Jia MD, 2017, RENEW SUST ENERGBUILDINGS, V68, P525, DOI 10.1016/j.rser.2016.10.011
- JOHNSON R, 1984, ENERGBUILDINGS, V6, P305, DOI 10.1016/0378-7788(84)90014-8
- Kamwa I, 1995, POW IND COMP APPL C
- Kaplan M, 1990, ASHRAE T, V96, P982
- Kaplan M, 1990, P ACEEE 1990 SUMM ST, V101, P15
- Kaplan M, 1990, P ACEEE 1990 SUMM ST, V10, P115
- Karmacharya S, 2012, P 2 INT S ENV FRIEND, V25-27, P202
- Kennedy MC, 2001, J ROY STAT SOC B, V63, P425, DOI 10.1111/1467-9868.00294
- Ketata R, 1992, THESIS
- Klein S., 1976, ASHRAE T, V82, P623
- Klein SA, 1979, TRNSYS16A TRANSIENT
- Kolokotsa D, 2009, BUILD ENVIRON, V44, P1850, DOI 10.1016/j.buildenv.2008.12.007
- Krarti M., 2010, ENERGY AUDIT BUILDING
- Krauchi P, 2012, P BAUS 2012 BERL GER
- Kuhn TE, 2006, ENERGBUILDINGS, V38, P661, DOI 10.1016/j.enbuild.2005.10.001
- Kumar R, 2013, ENERGBUILDINGS, V65, P352, DOI 10.1016/j.enbuild.2013.06.007
- La Scala M, 2014, APPL THERM ENG, V71, P658, DOI 10.1016/j.applthermaleng.2013.10.031
- Lachheb M, 2017, APPL THERM ENG, V111, P49, DOI 10.1016/j.applthermaleng.2016.09.083
- Lamnatou C, 2015, RENEW SUST ENERGBUILDINGS, V48, P178, DOI 10.1016/j.rser.2015.03.075
- Lamnatou C, 2015, RENEW SUST ENERGBUILDINGS, V45, P36, DOI 10.1016/j.rser.2015.01.024
- Laret L, 1981, THESIS
- Lehnhoff S, 2011, 2 IEEE PES INT C EXH
- Levermore G.J., 1992, BUILDING ENERGY MANA
- Li DHW, 2007, APPL ENERG, V84, P1199, DOI 10.1016/j.apenergy.2007.04.005
- Li HW, 2012, ENERGY, V45, P237, DOI 10.1016/j.energy.2012.03.056
- Li XW, 2017, COMPUT ENVIRON URBAN, V62, P168, DOI 10.1016/j.compenvurbsys.2016.09.007
- Liang TC, 2016, MATEC WEB C 95
- Lim HS, 2010, INDOOR BUILT ENVIRON, V19, P486, DOI 10.1177/1420326X10376440
- Linda P, 2007, RENEW SUST ENERGBUILDINGS, V11, P998
- Liu P, 2010, ENERGPOLICY, V38, P4224, DOI 10.1016/j.enpol.2010.03.051
- Lomas KJ, 1996, SOLAR RAD TRANSPORT, V57, P77
- Lourguioui H, 2017, INT J LIFE CYCLE ASS, V22, P1266, DOI 10.1007/s11367-017-1261-7
- Luo X, 2017, BUILD ENVIRON, V115, P42, DOI 10.1016/j.buildenv.2017.01.015
- Lyberg M, 1987, SOURCEBOOK ENERGY AU, V1-2
- Ma YD, 2009, IEEE DECIS CONTR P, P392, DOI 10.1109/CDC.2009.5400677
- Machairas V, 2014, RENEW SUST ENERGBUILDINGS, V31, P101, DOI 10.1016/j.rser.2013.11.036
- Magnier L, 2010, BUILD ENVIRON, V45, P739, DOI 10.1016/j.buildenv.2009.08.016
- MANZAN M, 2009, ENERGBUILDINGS, V72, P180
- Marchiori A., 2010, P 2 ACM WORKSH EMB S, P37
- Marvuglia A, 2017, J CLEAN PROD, V142, P1539, DOI 10.1016/j.jclepro.2016.11.150
- Masy G., 2006, P 7 INT C SYST SIM B
- Matic D, 2015, ENERGBUILDINGS, V98, P74, DOI 10.1016/j.enbuild.2014.10.041
- Mavrogianni A, 2017, BUILD RES INF, V45, P119, DOI 10.1080/09613218.2016.1208431
- Mayer PW, 2010, J AM WATER WORKS ASS, V102, P86
- Menchaca-Brandan MA, 2017, ENERGBUILDINGS, V138, P530, DOI 10.1016/j.enbuild.2016.12.037
- Mi XM, 2016, APPL ENERG, V175, P324, DOI 10.1016/j.apenergy.2016.05.032

- Michalek JJ, 2002, ENG OPTIMIZ, V34, P461, DOI 10.1080/0305215021000033735
- Mihalakakou G, 2002, ENERG BUILDINGS, V34, P727, DOI 10.1016/S0378-7788(01)00137-2
- Molyneaux A, 2010, ENERGY, V35, P751, DOI 10.1016/j.energy.2009.09.028
- Morais H, 2010, RENEW ENERG, V35, P151, DOI 10.1016/j.renene.2009.02.031
- Morel N., 2001, International Journal of Solar Energy, V21, P161, DOI 10.1080/01425910108914370
- Mousavi SM, 2016, INT J SUSTAIN BUILD, V7, P61
- Niemela T, 2017, ENERG BUILDINGS, V137, P60, DOI 10.1016/j.enbuild.2016.12.031
- Nikkho SK, 2017, APPL THERM ENG, V116, P850, DOI 10.1016/j.applthermaleng.2017.01.044
- NORFORD LK, 1994, ENERG BUILDINGS, V21, P121, DOI 10.1016/0378-7788(94)90005-1
- Nouidui T. S., 2012, P 9 INT MOD C MUN GE
- Nowak M, 2011, P 12 INT CARP CONTR, V25-28, P270
- NREL, 2010, OPT E PLUS SOFTW COM
- O'Neill Z, 2017, BUILD ENVIRON, V115, P157, DOI 10.1016/j.buildenv.2017.01.025
- Ochoa CE, 2012, J BUILD PERFORM SIMU, V5, P209, DOI 10.1080/19401493.2011.558211
- Ong YS, 2003, AIAA J, V41, P687, DOI 10.2514/2.1999
- Ostergard T, 2016, RENEW SUST ENERG REV, V61, P187, DOI 10.1016/j.rser.2016.03.045
- Pacheco R, 2012, RENEW SUST ENERG REV, V16, P3559, DOI 10.1016/j.rser.2012.03.045
- Palmero-Marrero AI, 2010, APPL ENERG, V87, P2040, DOI 10.1016/j.apenergy.2009.11.020
- Pazouki S, 2014, INT J ELEC POWER, V61, P335, DOI 10.1016/j.ijepes.2014.03.038
- Tavares MCP, 2017, ENERG BUILDINGS, V140, P280, DOI 10.1016/j.enbuild.2017.01.081
- Pisello AL, 2013, P 2013 WINT SIM C WA
- Pisello AL, 2016, ENERG BUILDINGS, V127, P870, DOI 10.1016/j.enbuild.2016.06.023
- Pisello AL, 2015, ENRGY PROCED, V81, P82, DOI 10.1016/j.egypro.2015.12.062
- Pisello AL, 2014, J URBAN TECHNOL, V21, P3, DOI 10.1080/10630732.2014.884386
- Pisello AL, 2012, BUILD ENVIRON, V58, P37, DOI 10.1016/j.buildenv.2012.06.017
- Pisello AL, 2012, APPL ENERG, V97, P419, DOI 10.1016/j.apenergy.2011.12.094
- Geidl M, 2007, THESIS
- Quan SJ, 2014, ENRGY PROCED, V61, P1602, DOI 10.1016/j.egypro.2014.12.181
- Raftery P, 2011, ENERG BUILDINGS, V43, P3666, DOI 10.1016/j.enbuild.2011.09.039
- Raftery P, 2011, ENERG BUILDINGS, V43, P2356, DOI 10.1016/j.enbuild.2011.05.020
- Reddy TA, 2006, ASHRAE TRAN, V112, P226
- Reddy TA, 2002, HVAC&R RES, V8, P101, DOI 10.1080/10789669.2002.10391291
- Reddy YJ, 2012, IEEE 5 POW IND C PIC
- Roberti F, 2017, ENERG BUILDINGS, V138, P1, DOI 10.1016/j.enbuild.2016.12.028
- Rodrigues MK, 2015, RENEW ENERG, V80, P538, DOI 10.1016/j.renene.2015.02.041
- Rossi F, 2014, APPL ENERG, V114, P621, DOI 10.1016/j.apenergy.2013.10.038
- Ruan YJ, 2017, ENERG BUILDINGS, V139, P385, DOI 10.1016/j.enbuild.2017.01.049
- Sahlin P, 1991, P IBPSA C NIC FRANC
- Sailor DJ, 2002, ATMOS ENVIRON, V36, P713, DOI 10.1016/S1352-2310(01)00452-6
- Salari M, 2017, RENEW SUST ENERG REV, V69, P822, DOI 10.1016/j.rser.2016.11.183
- Saltelli A, 2002, RISK ANAL, V22, P579, DOI 10.1111/0272-4332.00040
- Scerri P, 2002, J ARTIF INTELL RES, V17, P171
- Schiavoni S, 2017, BUILD SIMUL-CHINA, V10, P165, DOI 10.1007/s12273-016-0329-9
- Shaikh PH, 2014, RENEW SUST ENERG REV, V34, P409, DOI 10.1016/j.rser.2014.03.027
- Sibbit B, 2012, ENERGY PROCEDIA, V30, P356
- Sibilio S, 2017, RENEW SUST ENERG REV, V68, P920, DOI 10.1016/j.rser.2016.02.011
- Simson R, 2017, J BUILD PERFORM SIMU, V10, P378, DOI 10.1080/19401493.2016.1248488
- Soebarto V, 1997, P 4 INT IBPSA C PRAG
- Soleimani-Mohseni M, 2016, BUILD SIMUL-CHINA, V9, P629, DOI 10.1007/s12273-016-0300-9
- Song J, 2016, J WIND ENG IND AEROD, V149, P1, DOI 10.1016/j.jweia.2015.11.007
- Sousa J, 2012, CEUR WORKSH P 1 INT, V923, P57
- Stavarakakis GM, 2012, APPL MATH MODEL, V36, P193, DOI 10.1016/j.apm.2011.05.052
- Stazi F, 2017, ENERG BUILDINGS, V138, P716, DOI 10.1016/j.enbuild.2016.12.042
- Stazi F, 2014, APPL ENERG, V134, P176, DOI 10.1016/j.apenergy.2014.08.023
- Stundon D, 2015, P 31 ANN ASS RES CON
- Su X, 2016, J CLEAN PROD, V112, P275, DOI 10.1016/j.jclepro.2015.08.113
- Sunakorn P, 2011, PROCEDIA ENGINEER, V21, P34, DOI 10.1016/j.proeng.2011.11.1984
- Swan LG, 2009, RENEW SUST ENERG REV, V13, P1819, DOI 10.1016/j.rser.2008.09.033

The Mathworks, 2012, MATL PROGR V  
Thumann Albert, 2008, HDB ENERGY AUDITS  
TIAN Z, 2015, PROCEDIA ENG, V121, P1051, DOI 10.1016/j.proeng.2015.09.102  
Tol HI, 2012, ENERGY, V38, P276, DOI 10.1016/j.energy.2011.12.002  
Torio H, 2010, ENERGBUILDINGS, V42, P1601, DOI 10.1016/j.enbuild.2010.04.002  
Trnsys 17, TRNSYS 17 TRANS SYST  
Tzempelikos A, 2010, BUILD ENVIRON, V45, P2517, DOI 10.1016/j.buildenv.2010.05.014  
University of Strathclyde, EPS R OV  
Udomsri S, 2012, APPL ENERGB, V92, P175, DOI 10.1016/j.apenergy.2011.10.009  
[Anonymous], EN EFF REN EN  
van Hooff T, 2017, BUILD ENVIRON, V114, P148, DOI 10.1016/j.buildenv.2016.12.019  
Vasak M., 2011, 2011 Proceedings of 34th International Convention on Information and Communication Technology, Electronics and Microelectronics (MIPRO 2011), P739  
Vasco DA, 2017, APPL THERM ENG, V112, P771, DOI 10.1016/j.applthermaleng.2016.10.130  
WALTZ JP, 1992, ASHRAE TRAN, V98, P606  
The world Business Council for Sustainable Development, 2009, WBCSD TRANSF MARK EN  
Weiler V, 2017, ENERGBUILDINGS, V134, P319, DOI 10.1016/j.enbuild.2016.11.004  
Westphal F., 2005, P 9 INT C BUILD PERF, P1331  
Yilmaz S, 2017, J BUILD PERFORM SIMU, V10, P582, DOI 10.1080/19401493.2017.1287775  
Yoon J, 2003, J SOL ENERGB-T ASME, V125, P251, DOI 10.1115/1.1564076  
Yoon J, 1999, P BUILD SIM  
Yoon SH, 2011, BUILD ENVIRON, V46, P1141, DOI 10.1016/j.buildenv.2010.12.001  
Yuan J, 2015, ENERGBUILDINGS, V103, P107, DOI 10.1016/j.enbuild.2015.06.055  
Zhao HX, 2012, RENEW SUST ENERGB REV, V16, P3586, DOI 10.1016/j.rser.2012.02.049  
Zinzi M, 2016, ENERGBUILDINGS, V114, P206, DOI 10.1016/j.enbuild.2015.05.048

NR 218

TC 0

Z9 0

U1 6

U2 6

PU WILEY PERIODICALS, INC

PI SAN FRANCISCO

PA ONE MONTGOMERY ST, SUITE 1200, SAN FRANCISCO, CA 94104 USA

SN 2041-8396

EI 2041-840X

J9 WIRES ENERGY ENVIRON

JI Wiley Interdiscip. Rev. Energy Environ.

PD JAN-FEB

PY 2018

VL 7

IS 1

AR e269

DI 10.1002/wene.269

PG 34

WC Energy & Fuels

SC Energy & Fuels

GA FROEK

UT WOS:000418733800004

OA gold

DA 2018-05-03

ER

PT J

AU Cheah, SKA

Yeow, PHP

Nair, SR

Tan, FB

AF Cheah, Stephanie K. A.

Yeow, Paul H. P.

Nair, Sumesh R.

Tan, Felix B.

TI Behavioural modification framework to address wastage in household electricity consumption

SO ERGONOMICS

LA English

DT Article

DE Responsible consumption; electricity wastage; change of mindset; behaviouralmodification framework

ID REPERTORY GRID TECHNIQUE; ENERGY-CONSERVATION; VALUE ORIENTATIONS; SYSTEMS-APPROACH; SAVING BEHAVIOR; ERGONOMICS; MANAGEMENT; PRODUCTS; STRATEGY; INTERVENTION

AB Household electricity wastage poses a sustainability issue. Ergonomic interventions that prevent wastage through technological innovations are expensive and complex, making consumers unwilling to adopt them. The study aimed to investigate the motivations and impediments in avoiding electricity wastage. Thirteen Repertory Grid interviews were conducted on household electricity users relating to the behaviour of those living with them. The key motivational themes found were altruistic and egoistic reasons while the impediments were perceived behavioural control, hedonism and self-efficacy. Based on the research findings, a behavioural modification framework was developed to encourage consumers to adopt a higher level of responsible electricity practice through the following suggested interventions - (1) reframing sustainability from future-for-others' to present-for-us', (2) clarifying responsible consumption and (3) performance feedback. The research identified the key motivations and impediments of being a responsible household electricity user and provided a framework to encourage a higher responsibility level. Practitioner Summary: Household electricity wastage poses sustainability issue: excess CO<sub>2</sub> & high costs. We developed a mindset changing behavioural modification framework. We investigated HFE issues: motivations & impediments of avoiding the wastage, i.e. altruistic, egoistic, behavioural control, hedonism & self-efficacy. The framework provides governments insights into strategies to address the wastage.

Practitioner Summary: Household electricity wastage poses sustainability issue: excess CO<sub>2</sub> & high costs. We developed a mindset changing behavioural modification framework. We investigated HFE issues: motivations & impediments of avoiding the wastage, i. e. altruistic, egoistic, behavioural control, hedonism & self- efficacy. The framework provides governments insights into strategies to address the wastage.

C1 [Cheah, Stephanie K. A.; Yeow, Paul H. P.] Monash Univ Malaysia, Sch Business, Bandar Sunway, Malaysia.

[Nair, Sumesh R.] Murdoch Univ, Sch Business, Singapore, Singapore.

[Tan, Felix B.] Excelsia Coll, Sch Business, Macquarie Pk, NSW, Australia.

[Nair, Sumesh R.] Australian Inst Business, Adelaide, SA, Australia.

RP Yeow, PHP (reprint author), Monash Univ Malaysia, Sch Business, Bandar Sunway, Malaysia.

EM paul.yeow@monash.edu

FU Fundamental Research Grant Scheme (FRGS), Ministry of Higher Education, Malaysia [FRGS/1/2012/SS05/MUSM/02/2]

FX This work was supported by Fundamental Research Grant Scheme (FRGS), Ministry of Higher Education, Malaysia [grant number FRGS/1/2012/SS05/MUSM/02/2].

CR Abdur K., 2013, STAR, P29

Abrahamse W, 2007, J ENVIRON PSYCHOL, V27, P265, DOI 10.1016/j.jenvp.2007.08.002

Abrahamse W, 2009, J ECON PSYCHOL, V30, P711, DOI 10.1016/j.joep.2009.05.006

AJZEN I, 1991, ORGAN BEHAV HUM DEC, V50, P179, DOI 10.1016/0749-5978(91)90020-T

BANDURA A, 1977, PSYCHOL REV, V84, P191, DOI 10.1037//0033-295X.84.2.191

Berkhout PHG, 2000, ENERG POLICY, V28, P425, DOI 10.1016/S0301-4215(00)00022-7

Birkeland J., 2008, POSITIVE DEV VICIOUS

Brosius N, 2013, J PUBLIC POLICY MARK, V32, P286, DOI 10.1509/jppm.11.146

de Groot JIM, 2008, ENVIRON BEHAV, V40, P330, DOI 10.1177/0013916506297831

DUNN WN, 1986, HUM RELAT, V39, P955, DOI 10.1177/001872678603901101

Dunn W. N., 1986, POLICY ANAL PERSPECT, P355

Elkington J, 1998, CANNIBALS FORKS TRIP

FESTINGER L, 1962, SCI AM, V207, P93, DOI 10.1038/scientificamerican1062-93

- Flemming Scott A C, 2008, Proceedings of the Human Factors and Ergonomics Society. 52nd Annual Meeting, P748, DOI 10.1518/107118108X353435
- Flemming S. A. C., 2009, INT ERG ASS 17 TRIEN
- Fraj-Andres E, 2007, J INT CONSUM MARK, V19, P73, DOI 10.1300/J046v19n03\_05
- Golightly D, 2017, ERGONOMICS, V60, P307, DOI 10.1080/00140139.2016.1173231
- Han Q, 2013, ENER POLICY, V52, P706, DOI 10.1016/j.enpol.2012.10.031
- Hansla A, 2008, ENER POLICY, V36, P768, DOI 10.1016/j.enpol.2007.10.027
- Hanson MA, 2013, ERGONOMICS, V56, P399, DOI 10.1080/00140139.2012.751457
- Intergovernmental Panel on Climate Change, 2014, CLIM CHANG 2014 IPCC
- Jankowicz D., 2004, EASY GUIDE REPERTORY
- Jones W, 2017, ERGONOMICS, V60, P138, DOI 10.1080/00140139.2016.1165870
- Kluckhohn F.R., 1961, VARIATIONS VALUE ORI
- Kobus CBA, 2013, ERGONOMICS, V56, P451, DOI 10.1080/00140139.2012.721522
- Kolmuss A., 2002, ENVIRON EDUC RES, V8, P239, DOI DOI 10.1080/13504620220145401
- Krippendorff K, 1980, CONTENT ANAL INTRO I
- Kua HW, 2012, ENER POLICY, V47, P49, DOI 10.1016/j.enpol.2012.04.009
- Kubota T., 2011, J INT DEV COOPERAT, V17, P61
- Kuru A, 2013, ERGONOMICS, V56, P906, DOI 10.1080/00140139.2013.788737
- Laroche M, 2001, J CONSUM MARK, V18, P503, DOI 10.1108/EUM00000000006155
- MCCARTY JA, 1994, J BUS RES, V30, P53, DOI 10.1016/0148-2963(94)90068-X
- McCarty JA, 2001, J PUBLIC POLICY MARK, V20, P93, DOI 10.1509/jppm.20.1.93.17291
- Miles M. B., 1984, ED RES, V13, P20, DOI DOI 10.3102/0013189X013005020
- Mills B, 2012, ENER POLICY, V49, P616, DOI 10.1016/j.enpol.2012.07.008
- Mirosa M., 2011, ENVIRON BEHAV, V45, P455, DOI [10.1177/0013916511432332, DOI 10.1177/0013916511432332]
- MORAY N, 1995, ERGONOMICS, V38, P1691, DOI 10.1080/00140139508925220
- Napier NP, 2009, INFORM SYST J, V19, P255, DOI 10.1111/j.1365-2575.2007.00264.x
- Neuendorf K. A., 2002, CONTENT ANAL GUIDEBO
- Patton M. Q., 1990, QUALITATIVE EVALUATI
- Peattie K, 2010, ANNU REV ENV RESOUR, V35, P195, DOI 10.1146/annurev-environ-032609-094328
- Peffer T, 2013, ERGONOMICS, V56, P463, DOI 10.1080/00140139.2012.718370
- Phipps M, 2011, J PUBLIC POLICY MARK, V30, P203, DOI 10.1509/jppm.30.2.203
- Pickett-Baker J, 2008, J CONSUM MARK, V25, P281, DOI 10.1108/07363760810890516
- Pike S., 2003, J TRAVEL RES, V41, P326
- RIEMERSMA JBJ, 1988, ERGONOMICS, V31, P621, DOI 10.1080/00140138808966704
- Rokeach M., 1973, NATURE HUMAN VALUES
- Sanquist T., 2010, P HUM FACT ERG SOC 5, P763
- Sanquist T., 2008, HFES B, V51, P1
- SCHWARTZ SH, 1992, ADV EXP SOC PSYCHOL, V25, P1, DOI 10.1016/S0065-2601(08)60281-6
- Schwartz S. H., 1981, ALTRUISM HELP BEHAV, P189
- Sethumadhavan A, 2014, ERGON DES, V22, P33, DOI 10.1177/1064804614529531
- Shadbolt N. R., 2015, EVALUATION HUMAN WOR, P163
- Shaw D, 2009, INT J CONSUM STUD, V33, P215, DOI 10.1111/j.1470-6431.2009.00760.x
- Shui B, 2006, ENER POLICY, V34, P4063, DOI 10.1016/j.enpol.2005.09.010
- Stewart V., 1981, BUSINESS APPL REPERT
- Sutterlin B, 2011, ENER POLICY, V39, P8137, DOI 10.1016/j.enpol.2011.10.008
- Tan FB, 2002, MIS QUART, V26, P39, DOI 10.2307/4132340
- Tenaga Suruhanjaya, 2011, SURUHANYAJA TENAGA
- Thatcher A, 2016, APPL ERGON, V57, P1, DOI 10.1016/j.apergo.2016.05.007
- Thatcher A, 2016, ERGONOMICS, V59, P167, DOI 10.1080/00140139.2015.1066876
- Thatcher A, 2013, ERGONOMICS, V56, P389, DOI 10.1080/00140139.2012.718371
- The Brunei Times, 2012, BRUNEI TIMES 0213
- The Malaysian Times, 2013, MALAYSIAN TIMES 0316
- Thogersen J., 2005, J CONSUMER POLICY, V28, P143, DOI DOI 10.1007/S10603-005-2982-8
- Trinh K, 2014, ERGON DES, V22, P13, DOI 10.1177/1064804613516761
- UNCED (United Nations Conference on Environment and Development), 1992, REP UN C ENV DEV UN
- Vassileva I, 2012, ENERGY, V46, P94, DOI 10.1016/j.energy.2012.02.069
- Wang ZH, 2011, ENER POLICY, V39, P3550, DOI 10.1016/j.enpol.2011.03.055

WCED, 1987, OUR COMMON FUTURE RE

Wright RP, 2006, RES METHOD STRAT MAN, V3, P289, DOI 10.1016/S1479-8387(06)03010-4

Zink KJ, 2014, APPL ERGON, V45, P126, DOI 10.1016/j.apergo.2013.03.023

[Anonymous], 2009, PC ENERGY REPORT

NR 73

TC 0

Z9 0

U1 2

U2 2

PU TAYLOR & FRANCIS LTD

PI ABINGDON

PA 2-4 PARK SQUARE, MILTON PARK, ABINGDON OR14 4RN, OXON, ENGLAND

SN 0014-0139

EI 1366-5847

J9 ERGONOMICS

JI Ergonomics

PY 2018

VL 61

IS 5

BP 627

EP 643

DI 10.1080/00140139.2017.1397200

PG 17

WC Engineering, Industrial; Ergonomics; Psychology, Applied; Psychology

SC Engineering; Psychology

GA FZ8HN

UT WOS:000427848800002

PM 29092687

DA 2018-05-03

ER

PT J

AU Eon, C

Liu, X

Morrison, GM

Byrne, J

AF Eon, Christine

Liu, Xin

Morrison, Gregory M.

Byrne, Joshua

TI Influencing energy and water use within a home system of practice

SO ENERGY AND BUILDINGS

LA English

DT Article

DE Home system of practice; Monitoring; behaviour; Energy efficiency; Water efficiency; Routines

ID RESIDENTIAL BUILDINGS; MULTIPLE-REGRESSION; NEURAL-NETWORKS;

CONSUMPTION; BEHAVIOR; FEEDBACK; DEMAND; DESIGN; TERM; CONSERVATION

AB Approaches that attempt to influence resource use in the home often consider the building system alone, without due consideration of occupants and their practices. However, occupants interact with technology and ultimately affect energy and water metabolism in the home. This research used an explanatory design mixed method approach to investigate the energy and water use in eight homes over a two-year period, before and after an intervention based on persuasive behaviour change. Each home was considered as a system of practice and results were analysed in terms of overall resource reduction, changes in practice and changes made to the building systems. It was revealed that five of the homes succeeded in reducing their resource use through the two years. Most changes were achieved through affecting technology as an element of practice. Automation was shown to enable the dis-interlocking of practices from aligned and

- interlocked routines and can be considered an effective solution to influence resource use in the home. (C)  
2017 Elsevier B.V. All rights reserved.
- C1 [Eon, Christine; Liu, Xin; Morrison, Gregory M.; Byrne, Joshua] Curtin Univ, Sustainabil Policy Inst,  
U1987, Bldg 209, Level 1, Room 133, GPO Box, Perth, WA 6845, Australia.
- RP Eon, C (reprint author), Curtin Univ, Sustainabil Policy Inst, U1987, Bldg 209, Level 1, Room 133, GPO Box,  
Perth, WA 6845, Australia.
- EM Christine.eon@curtin.edu.au
- OI Liu, Xin/0000-0003-4513-3395
- FU CRC for Low Carbon Living Ltd - Cooperative Research Centres program, an  
Australian Government initiative
- FX This research is funded by the CRC for Low Carbon Living Ltd supported  
by the Cooperative Research Centres program, an Australian Government  
initiative.
- CR Abrahamse W, 2005, J ENVIRON PSYCHOL, V25, P273, DOI 10.1016/j.jenvp.2005.08.002
- AJZEN I, 1991, ORGAN BEHAV HUM DEC, V50, P179, DOI 10.1016/0749-5978(91)90020-T
- Anda M., 2013, ICT4S, P116
- Ashton-Graham C., 2013, INT APPROACHES BEHAV
- Billings RB, 1998, J WATER RES PL-ASCE, V124, P113, DOI 10.1061/(ASCE)0733-9496(1998)124:2(113)
- Browne A. L., 2014, INT J SOC RES METHOD, P1
- Brynjarsdottir H., 2012, SIGCHI C HUM FACT CO
- Buchanan K, 2015, ENERG POLICY, V77, P89, DOI 10.1016/j.enpol.2014.12.008
- Burbridge M., 2017, LIVING LABS DESIGN A
- Burgess J, 2008, ENERG POLICY, V36, P4454, DOI 10.1016/j.enpol.2008.09.039
- Chiang T, 2012, ENERG BUILDINGS, V55, P471, DOI 10.1016/j.enbuild.2012.07.026
- CIALDINI RB, 1991, ADV EXP SOC PSYCHOL, V24, P201, DOI 10.1016/S0065-2601(08)60330-5
- Clarke V, 2017, J POSIT PSYCHOL, V12, P297, DOI 10.1080/17439760.2016.1262613
- Creswell JW, 2011, DESIGNING CONDUCTING
- Dell'Era C, 2014, CREAT INNOV MANAG, V23, P137, DOI 10.1111/caim.12061
- Delmas MA, 2013, ENERG POLICY, V61, P729, DOI 10.1016/j.enpol.2013.05.109
- Department of Climate Change and Energy Efficiency, 2010, YOUR HOM TECHN MAN
- DEWHA, 2008, EN US AUSTR RES SECT
- Dong B, 2005, ENERG BUILDINGS, V37, P545, DOI 10.1016/j.enbuild.2004.09.009
- Emeakaroha A, 2014, ENERG BUILDINGS, V82, P719, DOI 10.1016/j.enbuild.2014.07.071
- Eon C., 2017, HOME SYSTEM PRACTICE
- Eon C., 2017, ENERG EFFIC, P1
- Festinger L, 1957, THEORY COGNITIVE DIS
- Foulds C, 2013, BUILD RES INF, V41, P622, DOI 10.1080/09613218.2013.823537
- Geelen D., 2012, J DES RES, V10
- Gram-Hanssen K, 2014, ARCHIT ENG DES MANAG, V10, P91, DOI 10.1080/17452007.2013.837251
- Gram-Hanssen K, 2010, J IND ECOL, V14, P150, DOI 10.1111/j.1530-9290.2009.00194.x
- Guerra-Santin O, 2016, ENERG BUILDINGS, V130, P546, DOI 10.1016/j.enbuild.2016.08.084
- Hargreaves T, 2013, ENERG POLICY, V52, P126, DOI 10.1016/j.enpol.2012.03.027
- Hens H, 2010, ENERG BUILDINGS, V42, P105, DOI 10.1016/j.enbuild.2009.07.017
- Hermanowicz JC, 2013, QUAL SOCIOL, V36, P189, DOI 10.1007/s11133-013-9247-7
- Herrera N., 2017, LIVING LABS DESIGN A
- Huebner GM, 2013, ENERG BUILDINGS, V66, P626, DOI 10.1016/j.enbuild.2013.07.043
- Jain A, 2001, WATER RESOUR MANAG, V15, P299, DOI 10.1023/A:1014415503476
- James Gareth, 2013, INTRO STAT LEARNING
- Laerd Statistics, 2015, STAT TUT SOFTW GUID
- Lam JC, 2010, ENERG CONVERS MANAGE, V51, P2692, DOI 10.1016/j.enconman.2010.06.004
- Leminen S., 2012, INT J PROD DEV, V17
- Liedtke C, 2015, J CLEAN PROD, V97, P106, DOI 10.1016/j.jclepro.2014.04.070
- Macrorie R., 2014, GOVERNING GOVERNED P
- McKenzie-Mohr D., 1999, FOSTERING SUSTAINABL
- Peschiera G, 2010, ENERG BUILDINGS, V42, P1329, DOI 10.1016/j.enbuild.2010.03.001
- Petersen E., 2007, INT J SUSTAINABILITY, V8, P16, DOI DOI 10.1108/14676370710717562
- Renstrom S., 2013, P IASDR C 2013 CONS, P1783
- Rosner B, 2006, BIOMETRICS, V62, P185, DOI 10.1111/j.1541-0420.2005.00389.x



Schatzki T., 1996, SOCIAL PRACTICES WIT  
 Schatzki T. R., 2002, SITE SOCIAL  
 Schultz PW, 2007, PSYCHOL SCI, V18, P429, DOI 10.1111/j.1467-9280.2007.01917.x  
 Scott K, 2012, DESIGN STUD, V33, P279, DOI 10.1016/j.destud.2011.08.002  
 Shove E, 2007, DESIGN EVERYDAY LIFE  
 Shove E., 2004, COMFORT CLEANLINESS  
 Shove E, 2008, BUILD RES INF, V36, P307, DOI 10.1080/09613210802079322  
 Shove E, 2015, EUR J SOC THEORY, V18, P274, DOI 10.1177/1368431015579964  
 Sorrell S, 2009, ENERG POLICY, V37, P1356, DOI 10.1016/j.enpol.2008.11.026  
 Spurling N., 2013, INTERVENTIONS PRACTI  
 Tso GKF, 2007, ENERGY, V32, P1761, DOI 10.1016/j.energy.2006.11.010  
 van Dam SS, 2010, BUILD RES INF, V38, P458, DOI 10.1080/09613218.2010.494832  
 Vassileva I, 2013, APPL ENERG, V106, P314, DOI 10.1016/j.apenergy.2013.01.059  
 Vellei M, 2016, ENERG BUILDINGS, V123, P179, DOI 10.1016/j.enbuild.2016.03.045  
 Warde A, 2005, J CONSUM CULT, V5, P131, DOI DOI 10.1177/1469540505053090  
 Water Corporation, 2017, EFF WAT YOUR GARD  
 Water Corporation, 2010, PERTH RES WAT US STU  
 WATER CORPORATION.ND, WAT SAV TIPS  
 Watson M, 2012, J TRANSP GEOGR, V24, P488, DOI 10.1016/j.jtrangeo.2012.04.002  
 Wei S, 2014, ENERG BUILDINGS, V70, P36, DOI 10.1016/j.enbuild.2013.11.001  
 Wood G, 2003, ENERG BUILDINGS, V35, P821, DOI 10.1016/S0378-7788(02)00241-4  
 Wood Simon N., 2017, GEN ADDITIVE MODELS  
 Yew M.H., 2012, 23 AUSTR C INF SYST, P1

NR 68

TC 0

Z9 0

U1 4

U2 4

PU ELSEVIER SCIENCE SA

PI LAUSANNE

PA PO BOX 564, 1001 LAUSANNE, SWITZERLAND

SN 0378-7788

EI 1872-6178

J9 ENERG BUILDINGS

J1 Energy Build.

PD JAN 1

PY 2018

VL 158

BP 848

EP 860

DI 10.1016/j.enbuild.2017.10.053

PG 13

WC Construction & Building Technology; Energy & Fuels; Engineering, Civil

SC Construction & Building Technology; Energy & Fuels; Engineering

GA FU1VC

UT WOS:000423636600072

DA 2018-05-03

ER

PT J

AU Fuentes, E

Arce, L

Salom, J

AF Fuentes, E.

Arce, L.

Salom, J.

TI A review of domestic hot water consumption profiles for application in systems and buildings energy performance analysis

## SO RENEWABLE &amp; SUSTAINABLE ENERGY REVIEWS

LA English

DT Review

DE Domestic hot water; User behaviour; Energy efficiency

ID SOLAR THERMAL-SYSTEMS; HEATING-SYSTEM; MANAGEMENT; RESOLUTION; MODEL;  
CONSERVATION; ELECTRICITY; COLLECTORS; PATTERNS; SCHOOLS

AB Domestic hot water usage (DHW) accounts for a significant share of energy consumption in different types of buildings. Achieving a detailed characterization of domestic hot water usage profiles is of great relevance, as this information will allow for a more reliable assessment of the energy efficiency of systems and buildings. A deeper knowledge of the features of demand profiles will allow for the design of innovative control strategies based on consumption patterns. In this study, the authors review recent works on hot water consumption profiles in different types of buildings and then synthesize available information for the accurate estimation of the energy consumption resulting from DHW use. Water draw-off consumption patterns specified in national and international technical standards are reviewed and influential parameters on water consumption are identified, including climatic conditions, seasonality, building type and socio-economic factors. State-of-the-art modelling tools for generating DHW usage profiles are summarised and new research lines are then proposed, taking into account the caveats in the current characterization and modelling of DHW consumption in buildings.

C1 [Fuentes, E.; Arce, L.; Salom, J.] IREC, Catalonia Inst Energy Res, Barcelona, Spain.

RP Fuentes, E (reprint author), IREC, Catalonia Inst Energy Res, Barcelona, Spain.

EM efuentes@irec.cat

OI Salom, Jaume/0000-0001-7035-3248

FU BEE Group of CIMNE for their collaboration through the project BECA (Balanced European Conservation Approach) under the ICT Policy Support Programme (ICT PSP) as part of the Competitiveness and Innovation Framework Programme by the European Community [270981]

FX The authors acknowledge the BEE Group of CIMNE for their collaboration through the project BECA (Balanced European Conservation Approach), Grant Agreement number: 270981, partially funded under the ICT Policy Support Programme (ICT PSP) as part of the Competitiveness and Innovation Framework Programme by the European Community.

CR Abrams DW, 1996, ASHRAE T, V97, P77

AENOR, 2005, 940022005 AENOR UNE

Ahmed K, 2015, ENER BUILDINGS, V97, P77, DOI 10.1016/j.enbuild.2015.03.051

[Anonymous], 2016, 022004 AICVF

Airaksinen M, 2011, ENERGIES, V4, P998, DOI 10.3390/en4070998

Aki H, 2016, APPL THERM ENG, V108, P697, DOI 10.1016/j.applthermaleng.2016.07.094

Ampatzi E, 2012, ENER BUILDINGS, V55, P285, DOI 10.1016/j.enbuild.2012.08.031

ASHRAE, 2003, HVAC APPL HDB

[Anonymous], 1994, 902 ASHRAE

Bagge H, 2011, ENERGY, V36, P2943, DOI 10.1016/j.energy.2011.02.037

Bakker V, 2008, P 9 INT C SYST ENG A

Bansal P, 2011, APPL THERM ENG, V31, P3748, DOI 10.1016/j.applthermaleng.2011.07.023

Barberan R, 2013, INT J HOSP MANAG, V34, P181, DOI 10.1016/j.ijhm.2013.02.005

Beal C, 2010, URBAN WATER SECURITY, V31, P1

Becker BR, 2012, ASHRAE T 2, V96, P422

Bennett C, 2013, EXPERT SYST APPL, V40, P1014, DOI 10.1016/j.eswa.2012.08.012

Bertrand A, 2016, APPL ENERGY IN PRESS

Bleys B, 2012, CIBW062 S

Blokker E, 2008, COMP WATER DEMAND MO, P182

Blokker EJM, 2011, J WATER RES PL-ASCE, V137, P511, DOI 10.1061/(ASCE)WR.1943-5452.0000146

Blokker EJM, 2010, J WATER RES PL-ASCE, V136, P19, DOI 10.1061/(ASCE)WR.1943-5452.0000002

Blokker E.J.M., 2013, AWWA, V105, pE19

Bohdanowicz P, 2007, ENER BUILDINGS, V39, P82, DOI 10.1016/j.enbuild.2006.05.005

Bouchelle MP, 2000, P S IMPR BUILD SYST

[Anonymous], 2006, 67002006 BS

Buchberger SG, 1996, J WATER RES PL-ASCE, V122, P11, DOI 10.1061/(ASCE)0733-9496(1996)122:1(11)

Bujak J, 2010, ENER BUILDINGS, V42, P1047, DOI 10.1016/j.enbuild.2010.01.017

- Burch J, 2007, INTERSOLAR 2007 C, P5  
Burch J, 2012, 2012 WORLD RENEWABLE  
Calmeyer JE, 1999, C AFR 1999 IEEE, V2  
[Anonymous], 2011, EN1461472011 CEN  
Charara N, 2011, J SUSTAIN TOUR, V19, P231, DOI 10.1080/09669582.2010.502577  
Cheng CL, 2004, BUILD ENVIRON, V39, P837, DOI 10.1016/j.buildenv.2004.01.006  
Clarke JM, 2006, AUST J WATER RESOUR, V10, P261, DOI 10.1080/13241583.2006.11465301  
Cobacho R, 2005, WA SCI TECHNOL, V5, P273  
Creaco E, 2015, E P 36 IAHR WORLD C  
Creaco E, 2015, PROCEDIA ENGINEER, V119, P1455, DOI 10.1016/j.proeng.2015.08.1006  
[Anonymous], 2013, TECH REP  
Deng SM, 2003, ENERG BUILDINGS, V35, P775, DOI 10.1016/S0378-7788(02)00238-4  
Despretz H, 2001, GREEN FLAG GREENER H  
Tortella BD, 2011, J ENVIRON MANAGE, V92, P2568, DOI 10.1016/j.jenvman.2011.05.024  
[Anonymous], 2002, DOMESTIC WATER USE S  
Dongellini M, 2015, ENRGY PROCED, V82, P630, DOI 10.1016/j.egypro.2015.12.012  
Edwards S, 2015, SOL ENERGY, V111, P43, DOI 10.1016/j.solener.2014.10.026  
Einfuhrung E, 2012, GRUNDLAGEN DIMENSION  
[Anonymous], 2017, EN128313  
[Anonymous], 2015, 132032 EN  
[Anonymous], 1996, 8063 EN  
[Anonymous], 2007, 15316312006 EN  
Enteria N, 2014, SOL ENERGY, V105, P243, DOI 10.1016/j.solener.2014.03.005  
Evarts JC, 2013, ENERG BUILDINGS, V58, P58, DOI 10.1016/j.enbuild.2012.11.020  
[Anonymous], 8352003 EVS  
Fairey P, 2004, RR5604 FSEC  
Ferrantelli A, 2017, ENERG BUILDINGS, V143, P53, DOI 10.1016/j.enbuild.2017.03.021  
Fischer D, 2016, ENERG BUILDINGS, V124, P120, DOI 10.1016/j.enbuild.2016.04.069  
Fuentes E, P 99 EUR SEM LLEID S  
Gato S, 2016, WATER SCI TECHNOL, V64, P36  
Gelazanskas L, 2015, ENERGIES, V8, P12702, DOI 10.3390/en81112336  
George D, 2015, ENERG BUILDINGS, V109, P304, DOI 10.1016/j.enbuild.2015.09.067  
Gerin O, 2014, CIBW062 S  
Grafton RQ, 2009, ENV EC RES HUB RES R  
Gregory GD, 2003, J APPL SOC PSYCHOL, V33, P1261, DOI 10.1111/j.1559-1816.2003.tb01949.x  
Guia tcnica, 2010, AG CAL SAN CENTR  
Guide Technique, 2004, BES EAU CHAUD SAN HA  
Hamele H., 2006, ENV INITIATIVES EURO  
Harvey L. D. D., 2006, HDB LOW ENERGY BUILD  
Haurant P, 2015, ENRGY PROCED, V78, P1991, DOI 10.1016/j.egypro.2015.11.391  
Heinrich M., 2007, 159 BRANZ  
Hendron R, P SIMBUILD 2004 IBPS  
Hendron R, NRELTP55047246  
Hendron R, SIMBUILD 2010  
Hobbi A, 2009, SOL ENERGY, V83, P700, DOI 10.1016/j.solener.2008.10.018  
Iglesias F, 2014, IEEE T IND INFORM, V10, P697, DOI 10.1109/TII.2013.2275032  
IMPIVA, 1995, TECH REP  
[Anonymous], 2011, C92202011 JIS  
Jordan U., 2001, REALISTIC DOMESTIC H, P2001  
Jordan U, 2003, SOLAR HEATING SYSTEM  
Kenney DS, 2008, J AM WATER RESOUR AS, V44, P192, DOI 10.1111/j.1752-1688.2007.00147.x  
Kim S. H., 2007, Water Science and Technology: Water Supply, V7, P61, DOI 10.2166/ws.2007.097  
Klein SA, 2010, TRNSYS 17 TRANSIENT  
Knight IK, 2007, IEA ANNEX, V42, P84  
Koiv T, WSEAS T ENV DEV, V10  
Koiv T, 2006, P ESTONIAN ACAD SCI  
Krippelova Z, 2014, BUD ZOPTYMALIZOWANYM, P49  
Ladd G, 1985, TECH REP

Loh M, 2003, P 27 HYDR WAT RES S  
Lutz J, 2005, TECH REP  
Lutz J, 2011, TECH REP  
Makki AA, 2013, J CLEAN PROD, V60, P129, DOI 10.1016/j.jclepro.2011.08.007  
Marini D, P 14 INT IBPSA C HYD  
Masiello J, 1992, RESIDENTIAL BUILDING, P157  
Mayer DeOreo, 1999, RESIDENTIAL END USES  
McKenna E, 2016, APPL ENERG, V165, P445, DOI 10.1016/j.apenergy.2015.12.089  
Meade B, 1999, P 1 PAN AM C LAT AM, P39  
Moia A, 2011, THESIS  
Moore AD, 2017, RENEW ENERG, V103, P187, DOI 10.1016/j.renene.2016.09.062  
Murakawa S, 2007, CIB W062 P 33 INT S  
Murakawa S, 2005, CIB W062 31 INT S WA  
Ndoye B, 2008, BUILD ENVIRON, V43, P1216, DOI 10.1016/j.buildenv.2007.02.012  
Negnevitsky M, 2015, IEEE T POWER SYST, V30, P212, DOI 10.1109/TPWRS.2014.2329323  
Oduro-Kwarteng S, 2009, URBAN WATER J, V6, P449, DOI 10.1080/15730620903108975  
PAPAKOSTAS KT, 1995, SOL ENERGY, V54, P369, DOI 10.1016/0038-092X(95)00014-I  
Perez-Lombard, 2013, ENERGY BUILD, V40, P394  
Perlman M, 1985, ASHRAE T, V91  
Pflugradt N.D., 2016, THESIS  
Popescu D, 2008, P 6 IASME WSEAS INT  
Project BECA, 2013, FINAL REPORT  
Rankin R, 2006, ENERG CONVERS MANAGE, V47, P687, DOI 10.1016/j.enconman.2005.06.002  
Rathnayaka K, 2015, WATER-SUI, V7, P202, DOI 10.3390/w7010202  
[Anonymous], 1988, 6011 DTU  
Richard M., 2016, THESIS  
Ries R, P 13 BUILD SIM AUG 2  
Rocheron C, 2012, THESIS  
Sandels C, 2014, APPL ENERG, V131, P267, DOI 10.1016/j.apenergy.2014.06.048  
Scheepers HM, 2014, J WATER SUPPLY RES T, V63, P476, DOI 10.2166/aqua.2014.100  
SHAN YX, 2015, PROCEDIA ENGINEER, V119, P1409, DOI DOI 10.1016/J.PROENG.2015.08.1001  
Spur R, 2006, APPL ENERG, V83, P749, DOI 10.1016/j.apenergy.2005.07.001  
Takata H, 2003, CIB W062 P 29 INT S  
Thrasher WH, 1993, 600RP ASHRAE  
Ulseth R, 2014, P 14 INT S DISTR HEA  
[Anonymous], 2006, EN12976 UNE  
Urban E, 2011, MONITORING MODELING  
[Anonymous], 2008, 46520085 VDI  
Vine E, 1986, ACEEE C SANT CRUZ CA  
Wang W, 2007, P 10 BUILD SIM CHIN  
[Anonymous], WAT HEAT DAT COLL AN  
Widen J, 2009, ENERG BUILDINGS, V41, P753, DOI 10.1016/j.enbuild.2009.02.013  
Willis R, 2009, REVEALING IMPACT SOC  
Wong LT, 2010, APPL ENERG, V87, P703, DOI 10.1016/j.apenergy.2009.08.008  
Yao RM, 2005, ENERG BUILDINGS, V37, P663, DOI 10.1016/j.enbuild.2004.09.007  
[Anonymous], 2008, MEASUREMENT DOMESTIC  
[Anonymous], 2011, HOTEL ENERGY SOLUTIO  
[Anonymous], 2016, TRANSOL 3 0 MANUAL  
[Anonymous], 2003, TECH REP

NR 134

TC 0

Z9 0

U1 14

U2 14

PU PERGAMON-ELSEVIER SCIENCE LTD

PI OXFORD

PA THE BOULEVARD, LANGFORD LANE, KIDLINGTON, OXFORD OX5 1GB, ENGLAND

SN 1364-0321

J9 RENEW SUST ENERG REV

J1 Renew. Sust. Energ. Rev.

PD JAN

PY 2018

VL 81

BP 1530

EP 1547

DI 10.1016/j.rser.2017.05.229

PN 1

PG 18

WC GREEN & SUSTAINABLE SCIENCE & TECHNOLOGY; Energy & Fuels

SC Science & Technology - Other Topics; Energy & Fuels

GA FO7QF

UT WOS:000417070500109

DA 2018-05-03

ER

PT J

AU Gi, K

Sano, F

Hayashi, A

Tomoda, T

Akimoto, K

AF Gi, Keii

Sano, Fuminori

Hayashi, Ayami

Tomoda, Toshimasa

Akimoto, Keigo

TI A global analysis of residential heating and cooling service demand and cost-effective energy consumption under different climate change scenarios up to 2050

SO MITIGATION AND ADAPTATION STRATEGIES FOR GLOBAL CHANGE

LA English

DT Article

DE Residential energy service demand; Space heating; Space cooling; Water heating; Heating and cooling degree days; Climate change feedback; Global energy assessment model

ID SECTOR; MODEL

AB Climate change and energy service demand exert influence on each other through temperature change and greenhouse gas emissions. We have consistently evaluated global residential thermal demand and energy consumption up to the year 2050 under different climate change scenarios. We first constructed energy service demand intensity (energy service demand per household) functions for each of three services (space heating, space cooling, and water heating). The space heating and cooling demand in 2050 in the world as a whole become 2.1-2.3 and 3.8-4.5 times higher than the figures for 2010, whose ranges are originated from different global warming scenarios. Cost-effective residential energy consumption to satisfy service demand until 2050 was analyzed keeping consistency among different socio-economic conditions, ambient temperature, and carbon dioxide (CO<sub>2</sub>) emission pathways using a global energy assessment model. Building shell improvement and fuel fuel-type transition reduce global final energy consumption for residential thermal heating by 30% in 2050 for a 2 degrees C target scenario. This study demonstrates that climate change affects residential space heating and cooling demand by regions, and their desirable strategies for cost-effective energy consumption depend on the global perspectives on CO<sub>2</sub> emission reduction. Building shell improvement and energy efficiency improvement and fuel fuel-type transition of end-use technologies are considered to be robust measures for residential thermal demand under uncertain future CO<sub>2</sub> emission pathways.

C1 [Gi, Keii; Sano, Fuminori; Hayashi, Ayami; Tomoda, Toshimasa; Akimoto, Keigo] Res Inst Innovat Technol Earth, Kizugawadai 9-2, Kizugawa, Kyoto 6120292, Japan.

RP Gi, K (reprint author), Res Inst Innovat Technol Earth, Kizugawadai 9-2, Kizugawa, Kyoto 6120292, Japan.

EM kgi@rite.or.jp

OI Gi, Keii/0000-0003-3532-2272  
CR Akimoto K, 2014, ENERGY STRATEG REV, V2, P246, DOI 10.1016/j.esr.2013.06.002  
Akimoto K, 2012, NAT RESOUR FORUM, V36, P231, DOI 10.1111/j.1477-8947.2012.01460.x  
Akimoto K, 2010, ENER POLICY, V38, P3384, DOI 10.1016/j.enpol.2010.02.012  
Daioglou V, 2012, ENERGY, V37, P601, DOI 10.1016/j.energy.2011.10.044  
DEWHA, 2008, EN US AUSTR RES SECT  
DOE, 2011, BUILD EN DAT BOOK  
Grubler A, 1990, RISE FALL INFRASTRUC  
Hayashi A, 2013, MITIG ADAPT STRAT GL, V18, P591, DOI 10.1007/s11027-012-9377-3  
Hayashi A, 2010, CLIMATIC CHANGE, V98, P87, DOI 10.1007/s10584-009-9663-6  
IEA, 2015, EN TECHN PERSP  
IEA Solar Heating & Cooling Programme (SHC), 2016, SOLAR HEAT WORLDWIDE  
IEA, 2004, OIL CRIS CLIM CHALL  
IEA, 2015, EN BAL OECD NONOECD  
IEEJ, 2013, HDB EN EC STAT JAP  
IRENA, 2014, REMAP 2030  
Ironmonger D, 2000, PROJ LINK M  
Isaac M, 2009, ENER POLICY, V37, P507, DOI 10.1016/j.enpol.2008.09.051  
Jaglom WS, 2014, ENER POLICY, V73, P524, DOI 10.1016/j.enpol.2014.04.032  
KAPSARC, 2015, KS1514DP08A KAPSARC  
Labriet M, 2015, MITIG ADAPT STRAT GL, V20, P1111, DOI 10.1007/s11027-013-9522-7  
Meinshausen M, 2011, ATMOS CHEM PHYS, V11, P1417, DOI 10.5194/acp-11-1417-2011  
Nakagami H, 2014, ACEEE SUMMER STUDY E, V8, P214  
NRCAN, 2014, COMPR EN US DAT  
O'Neill BC, 2014, CLIMATIC CHANGE, V122, P387, DOI 10.1007/s10584-013-0905-2  
de Lucena AFP, 2010, GLOBAL ENVIRON CHANG, V20, P342, DOI 10.1016/j.gloenvcha.2010.01.004  
RITE, 2012, REP ALPS PROJ  
RITE, 2015, RITE GHG MIT ASS MOD  
Taylor KE, 2012, B AM METEOROL SOC, V93, P485, DOI 10.1175/BAMS-D-11-00094.1  
United Nations, 2015, WORLD POP PROSP  
Urge-Vorsatz D, 2013, CURR OPIN ENV SUST, V5, P141, DOI 10.1016/j.cosust.2013.05.004  
Urge-Vorsatz D, 2012, CTR CLIM CHANG SUST  
Wada K, 2012, ENERGY, V48, P5, DOI 10.1016/j.energy.2012.01.046  
Watanabe M, 2010, J CLIMATE, V23, P6312, DOI 10.1175/2010JCLI3679.1  
NR 33  
TC 0  
Z9 0  
U1 7  
U2 7  
PU SPRINGER  
PI DORDRECHT  
PA VAN GODEWIJCKSTRAAT 30, 3311 GZ DORDRECHT, NETHERLANDS  
SN 1381-2386  
EI 1573-1596  
J9 MITIG ADAPT STRAT GL  
JI Mitig. Adapt. Strateg. Glob. Chang.  
PD JAN  
PY 2018  
VL 23  
IS 1  
BP 51  
EP 79  
DI 10.1007/s11027-016-9728-6  
PG 29  
WC Environmental Sciences  
SC Environmental Sciences & Ecology  
GA FSOPY  
UT WOS:000419477400003

DA 2018-05-03  
ER

PT J

AU Guo, F  
Akenji, L  
Schroeder, P  
Bengtsson, M

AF Guo, Fei  
Akenji, Lewis  
Schroeder, Patrick  
Bengtsson, Magnus

TI Static analysis of technical and economic energy-saving potential in the residential sector of Xiamen city

SO ENERGY

LA English

DT Article

DE Technical potential; Economic potential; Energy savings; Household energy consumption; Levelised cost of conserved energy; Residential buildings

ID BUILDINGS; CHINA; MODEL; EFFICIENCY; HEAT

AB Based on a household energy use survey, this paper explores the technical and economic potential of residential energy savings in a Chinese city, Xiamen. The survey adopted a similar questionnaire used by the U.S. EIA's Residential Energy Consumption Survey (RECS), covering the end-uses of cooking, water heating, plug-in appliances, lighting and space cooling. The analysis shows that the technical potential of energy savings in Xiamen's residential buildings is significant, around 20%. Of the technical potential, about two-thirds to four-fifths are cost-effective from a whole society perspective. The cost-effectiveness was evaluated by comparing the Levelised Cost of Conserved Energy (LCOCE) of advanced technical measures with the actual cost of conserved energy. The actual cost of energy is defined by adding the carbon emission cost and hidden government subsidies over the retail prices of energy. About three-quarters of the technical energy-saving potential in Xiamen come from adopting efficient household appliances, therefore, further tightening the energy efficiency standards for key household appliances and promoting wide diffusion of efficient models of appliances by various effective financial incentives are essential for achieving residential energy savings in China's "Hot Summer and Warm Winter" region where Xiamen locates. (C) 2017 Elsevier Ltd. All rights reserved.

C1 [Guo, Fei] Int Inst Appl Syst Anal, Schlosspl 1, A-2361 Laxenburg, Austria.

[Akenji, Lewis; Bengtsson, Magnus] Inst Global Environm Strategies, Hayama, Kanagawa 2400115, Japan.  
[Schroeder, Patrick] Inst Dev Studies, Lib Rd, Brighton BN1 9RE, E Sussex, England.

RP Guo, F (reprint author), Int Inst Appl Syst Anal, Schlosspl 1, A-2361 Laxenburg, Austria.

EM guofei2003@gmail.com

FU Institute for Global Environmental Strategies (IGES), Japan, through its Asian Development Bank [RETA 7450]

FX This research is sponsored by the Institute for Global Environmental Strategies (IGES), Japan, through its Asian Development Bank funded project RETA 7450.

CR AQSIQ (General Administration of Quality Supervision Inspection and Quar-antine of China) and SAC, 2008, SAF MAN REG GAS BURN

ASHRAE, 2010, 9012010 ASHRAE

Bourland D., 2010, INCREMENTAL COST MEA

Boyano A, 2013, ENERGBUILDINGS, V65, P19, DOI 10.1016/j.enbuild.2013.05.039

Broin EO, 2013, ENERGY, V57, P134, DOI 10.1016/j.energy.2013.01.016

Cai LH, 2006, THESIS

CBEEEX (China Beijing Environment Exchange), 2017, TRAD INF

CEC (China Electricity Council), 2016, IND STAT 2015

Chedwal R, 2015, ENERGBUILDINGS, V92, P282, DOI 10.1016/j.enbuild.2015.01.066

Chirarattananon S, 2010, ENERGY, V35, P1741, DOI 10.1016/j.energy.2009.12.027

CLASP, 2005, POL AN MOD SYST PAMS

EIA, 2013, RES DEM MOD NAT EN M

Eldridge, 2008, ENERGY EFFICIENCY 1  
 Eldridge, 2009, POTENTIAL ENERGY EFF  
 Energy Label (of China), 2016, NAT STAND EN EFF APP  
 EPA, 2014, EM FACT GREENH GAS I  
 Farese P, 2012, TOOL PRIORITIZE ENER  
 Guo F, 2016, RENEW SUST ENERG REV, V62, P507, DOI 10.1016/j.rser.2016.04.070  
 Hong L, 2013, ENER POLICY, V54, P335, DOI 10.1016/j.enpol.2012.11.045  
 IEA, 2009, EN BAL NON OECD COUN  
 IEA, 2012, CO2 EM FUEL COMB HIG  
 IEA, 2016, WORLD EN BAL 2016  
 Jiang ZJ, 2013, ENER POLICY, V63, P599, DOI 10.1016/j.enpol.2013.08.059  
 Kamaruzzaman SN, 2015, ENER BUILDINGS, V90, P85, DOI 10.1016/j.enbuild.2014.12.045  
 Kastovich JC, 1982, ADV ELECT HEAT PUMP  
 Ministry of Housing and Urban -Rural Development of China (MOHURD), 2017, PLAN EN SAV BUILD  
 DE  
 NAPEE (National Action Plan for Energy Efficiency), 2008, UND COST EFF EN EFF  
 NBSC, 2008, CHIN STAT YB 2008 20  
 National Bureau of Statistics of China (NBSC), 2016, CHIN STAT YB 2016  
 Ouyang JL, 2009, ENER POLICY, V37, P140, DOI 10.1016/j.enpol.2008.07.041  
 Petrovic S, 2016, ENERGY, V110, P166, DOI 10.1016/j.energy.2016.04.046  
 SAC (Standardization Administration of China), 2012, SAF US LIF CYCL HOUS  
 Saidur R, 2009, ENER POLICY, V37, P4104, DOI 10.1016/j.enpol.2009.04.052  
 The State Council of China, 2016, 13 5 YEAR PLAN NAT E  
 Swisher JN, 1997, 7 UNEP COLL CTR EN  
 THUBERC (Tsinghua University Building Energy Research Center), 2013, ANN REP CHIA BUILD E  
 EIA (U. S. Energy Information Administration), 2014, RES EN CONS SURV  
 EPA (U. S. Environmental Protection Agency), 2007, GUID COND EN EFF POT  
 World Bank, 2017, ONL DAT  
 XBS, 2011, INTR XIAM CIT DEV 3  
 XBS (Xiamen Bureau of Statistics), 2016, YB XIAM SPEC EC ZON  
 XBS, 2012, FEAT TRENDS XIAM POP  
 XBS, 2012, YB XIAM SPEC EC ZON  
 Xu YQ, 2008, REFRIG AIR COND HEAT, V83  
 Zhang BL, 2010, CHOOSE EXTERNAL THER  
 Zhou QS, 2010, BUILD SCI, V26  
 Zhuang JZ, 2007, ADB ERD WORKING PAPE, V94  
 Zvingilaite E, 2013, ENER POLICY, V55, P57, DOI 10.1016/j.enpol.2012.09.056  
 NR 48  
 TC 0  
 Z9 0  
 U1 2  
 U2 2  
 PU PERGAMON-ELSEVIER SCIENCE LTD  
 PI OXFORD  
 PA THE BOULEVARD, LANGFORD LANE, KIDLINGTON, OXFORD OX5 1GB, ENGLAND  
 SN 0360-5442  
 EI 1873-6785  
 J9 ENERGY  
 JI Energy  
 PD JAN 1  
 PY 2018  
 VL 142  
 BP 373  
 EP 383  
 DI 10.1016/j.energy.2017.10.042  
 PG 11  
 WC Thermodynamics; Energy & Fuels  
 SC Thermodynamics; Energy & Fuels



GA FV8RQ  
 UT WOS:000424854900034  
 DA 2018-05-03  
 ER

PT J

AU Knowles, HS  
 Hostetler, ME  
 Liebovitch, LS

AF Knowles, Hal S., III  
 Hostetler, Mark E.  
 Liebovitch, Larry S.

TI Describing the dynamics, distributions, and multiscale relationships in  
 the time evolution of residential building energy consumption

SO ENERGY AND BUILDINGS

LA English

DT Article

DE Fractal dimension; Electricity smart meter; Complex systems; Building  
 performance; Nonlinear dynamics; Probability density function

ID PHYSIOLOGY; BEHAVIOR; SYSTEMS; MARKET; COMPLEXITY; DISEASE

AB Residential buildings may be described as complex social-technological systems. expressing component interdependence and chaotic temporal variability. As such, we characterized the dynamics and multiscale relationships of hourly electricity consumption data for 13 occupied Florida houses from calendar year 2013. Statistical approaches included: (1) exploratory data analyses with distribution-based descriptive statistics; (2) normality testing; (3) spectral and monofractal analyses; (4) multifractal detrended fluctuation analyses (MFDFA) with surrogate testing; and (5) Ward's minimum variance method for hierarchical agglomerative clustering. Results suggested the energy-use patterns were non-normal, nonlinear, and exhibited predominantly anti-persistent fractal complexities. Thus, classical descriptive statistics presuming Gaussian probability density function (PDF) distributions neither well fit, nor well described, the data and their interdependent characteristics. Notably, clusters of comparable houses were categorically and statistically different when using descriptors based on normality (e.g., mean, variance, skewness, kurtosis) versus those based on fractality (e.g., Hurst exponent, multifractal spectrum width). We believe MFDFA statistical outputs may serve as novel indicators of residential building dynamics as they better characterize the complex, nonlinear asset and occupancy interactions and they require no assumptions regarding the PDF distribution shape. We offer guidance on the data management, transformation, parameterization, and interpretation processes necessary to apply MFDFA to whole-house, short-interval, electricity consumption time series data. Multifractal quantification of building performance time series data may be useful on multiple fronts: (1) detecting under-performing households; (2) improving segmentation, targeting, and pre/post analyses of energy efficiency interventions; (3) diagnosing building system failure risks; and (4) improving smart grid supply and load balancing. (C) 2017 Elsevier B.V. All rights reserved.

C1 [Knowles, Hal S., III] Univ Florida, Program Resource Efficient Communities, Inst Food & Agr Sci, 2295 Mowry Rd,Bldg 0106,POB 110940, Gainesville, FL 32611 USA.

[Hostetler, Mark E.] Univ Florida, Dept Wildlife Ecol & Conservat, Inst Food & Agr Sci, 215 Newins Ziegler Hall,POB 110430, Gainesville, FL 32611 USA.

[Liebovitch, Larry S.] CUNY Queens Coll, Phys Dept, 65-30 Kissena Blvd,Sci Bldg Room B322, Flushing, NY 11367 USA.

RP Knowles, HS (reprint author), Univ Florida, Program Resource Efficient Communities, Inst Food & Agr Sci, 2295 Mowry Rd,Bldg 0106,POB 110940, Gainesville, FL 32611 USA.

EM hknowles@ufl.edu; hostetm@ufl.edu; Larry.Liebovitch@qc.cuny.edu

FU Florida Energy Systems Consortium, a unit of the State University System of Florida [00071381, 00077815, 00092567]; University of Florida Program for Resource Efficient Communities

FX This research was supported, in part, by the Florida Energy Systems Consortium, a unit of the State University System of Florida [Grant Award Number 00071381; PS Primary Project Number 00077815; and PS Subproject Number 00092567]; and the University of Florida Program for Resource Efficient Communities [Grant Award Number N/A].

CR Baranger M., CHAOS COMPLEXITY ENT

- Bhattacharya P, 2011, J PHYS CONF SER, V319, DOI 10.1088/1742-6596/319/1/012004  
Bizzarri M, 2011, SEMIN CANCER BIOL, V21, P175, DOI 10.1016/j.semancer.2011.04.002  
Brown C. T., 2010, FRACTAL ANAL  
Cryer JD, 2008, SPRINGER TEXTS STAT, P1  
Deng WB, 2010, INT J MOD PHYS C, V21, P79, DOI 10.1142/S0129183110014963  
DOBRZANSKA I, 1992, ELECTR POW SYST RES, V23, P161, DOI 10.1016/0378-7796(92)90085-F  
Dokukin ME, 2011, PHYS REV LETT, V107, DOI 10.1103/PhysRevLett.107.028101  
EIA FAQ, 2016, MAN SMART MET AR INS  
Eke A, 2002, PHYSIOL MEAS, V23, pR1, DOI 10.1088/0967-3334/23/1/201  
Emery AF, 2006, ENERGY, V31, P677, DOI 10.1016/j.energy.2005.04.006  
Falconer K., 2014, FRACTAL GEOMETRY MAT  
Folke C, 2006, GLOBAL ENVIRON CHANG, V16, P253, DOI 10.1016/j.gloenvcha.2006.04.002  
Ghosh D, 2016, INT J ELEC POWER, V74, P162, DOI 10.1016/j.ijepes.2015.07.026  
Glass L, 2001, NATURE, V410, P277, DOI 10.1038/35065745  
Goldberger AL, 2002, P NATL ACAD SCI USA, V99, P2466, DOI 10.1073/pnas.012579499  
Heyde C. C., 2010, SELECTED WORKS CC HE, P432  
Hill RA, 2008, BIOL LETTERS, V4, P748, DOI 10.1098/rsbl.2008.0393  
Ihlen EAF, 2012, FRONT PHYSIOL, V3, DOI 10.3389/fphys.2012.00141  
Jebaraj S, 2006, RENEW SUST ENERG REV, V10, P281, DOI 10.1016/j.rser.2004.09.004  
Jones P., 2008, REAL ESTATE ISSUES, V33, P65  
Liebovitch L. S., 2000, Complexity, V5, P34, DOI 10.1002/1099-0526(200003/04)5:4<34::AID-CPLX5>3.0.CO;2-3  
LUTZENHISER L, 1993, ANNU REV ENERG ENV, V18, P247, DOI 10.1146/annurev.energy.18.1.247  
Ma QDY, 2010, PHYS REV E, V81, DOI 10.1103/PhysRevE.81.031101  
Mandelbrot B.B., 1982, FRACTAL GEOMETRY NAT  
Mandelbrot B.B., 2004, MISBEHAVIOR MARKETS  
NIST, 2013, NIST SEMATECH E HDB  
Norberg J., 2013, COMPLEXITY THEORY SU  
Norouzzadeh P, 2007, PHYSICA A, V380, P333, DOI 10.1016/j.physa.2007.02.087  
Ozer N., 2012, RES GEOPHYS, V2  
Pappas P. A., 2003, OVERVIEW NONPARAMETR  
Parker D., 2012, ACCURACY HOME ENERGY  
Potirakis S. M., 2011, ARXIV11125746  
Prowler D., 2012, WHOLE BUILDING DESIG  
Richardson M., 2016, NONLINEAR METHODS PS  
Riley M. A., 2005, TUTORIALS CONT NONLI  
Riley MA, 2012, FRONT PHYSIOL, V3, DOI 10.3389/fphys.2012.00371  
Shu H., 2004, J N CHINA ELECT POWE, V2004  
SHUMWAY R., 2010, TIME SERIES ANAL ITS  
Stanley HE, 1999, PHYSICA A, V270, P309, DOI 10.1016/S0378-4371(99)00230-7  
Stein JR, 2000, ENERGY, V25, P339, DOI 10.1016/S0360-5442(99)00072-9  
Swan LG, 2009, RENEW SUST ENERG REV, V13, P1819, DOI 10.1016/j.rser.2008.09.033  
Takens F., 1981, LECT NOTES MATH, V898, P366, DOI DOI 10.1007/BFB0091924  
THEILER J, 1992, PHYSICA D, V58, P77, DOI 10.1016/0167-2789(92)90102-S  
Trochim William, 2006, RES METHODS KNOWLEDG  
U.S. Department of Energy, WHOL HOUS SYST APPR  
Vaillancourt DE, 2002, NEUROBIOL AGING, V23, P1, DOI 10.1016/S0197-4580(01)00247-0  
WALKER B, 2004, ECOL SOC, V9  
Wang X., 2010, J NONLIN SCI, V20  
Webber CL, 2012, FRONT PHYSIOL, V3, DOI 10.3389/fphys.2012.00382  
West BJ, 2010, FRONT PHYSIOL, V1, DOI 10.3389/fphys.2010.00001  
West GB, 1999, SCIENCE, V284, P1677, DOI 10.1126/science.284.5420.1677  
Xue W., 2006, POWER SYST TECHNOL, V2006

NR 53

TC 0

Z9 0

U1 3

U2 3  
 PU ELSEVIER SCIENCE SA  
 PI LAUSANNE  
 PA PO BOX 564, 1001 LAUSANNE, SWITZERLAND  
 SN 0378-7788  
 EI 1872-6178  
 J9 ENERGBUILDINGS  
 JI Energy Build.  
 PD JAN 1  
 PY 2018  
 VL 158  
 BP 310  
 EP 325  
 DI 10.1016/j.enbuild.2017.09.071  
 PG 16  
 WC Construction & Building Technology; Energy & Fuels; Engineering, Civil  
 SC Construction & Building Technology; Energy & Fuels; Engineering  
 GA FU1VC  
 UT WOS:000423636600029  
 DA 2018-05-03  
 ER

PT J  
 AU Zhang, LM  
 Li, Y  
 Stephenson, R  
 Ashuri, B

AF Zhang, Limao  
 Li, Yan  
 Stephenson, Robert  
 Ashuri, Baabak

TI Valuation of energy efficient certificates in buildings

SO ENERGY AND BUILDINGS

LA English

DT Article

DE Energy efficient labels; Valuation; Housing market; Atlanta; Hedonic pricing method; EarthCraft

ID HOUSING-MARKET; CONSUMPTION; AUSTRALIA; STANDARDS; QUALITY; PRICES; REGION; LABELS; CITY

AB Building energy efficiency labeling programs are promising strategies to encourage investments in green buildings. It is necessary to explicitly measure the value of energy efficient labels from an economic perspective that is more understandable to both developers and buyers. This research not only documents evidence on whether a sales premium exists for energy-certified homes but also investigates the effects of market characteristics on the magnitude of the added value of building energy efficiency labeling programs. A hedonic pricing model of 1679 single-family home sales in the metropolitan Atlanta area in the U.S. is developed, with numerous explanatory variables (such as location, time of sale, green features, and other housing characteristics) taken into account. Results indicate that: (i) Homes that earn energy certificates demonstrate a sales price premium of 11.7%, which equates to a dollar value of over \$47,000 in Atlanta's housing market; (ii) The regional energy labels certificated by the EarthCraft House receives higher recognition in the marketplace than that by national Energy Star programs. (iii) The certified homes that are located in the top school districts (i.e., with the top 50 schools) enjoy a substantially higher increase in the home sales premium, compared to green homes in districts with the low-quality schools. A random sampling method is further used to ensure the quality of the regression results with the limited size of the dataset by eliminating stochastic effects of the selected dataset. This research contributes to (i) the body of knowledge by analyzing the market value of building energy efficiency labels in the residential housing market and (ii) the state of practice by shedding light on the information asymmetry problem between home developers and buyers in the housing market to facilitate the adoption of energy labels in building products. (C) 2017 Elsevier B.V. All rights reserved.

C1 [Zhang, Limao] Huazhong Univ Sci & Technol, Sch Civil Engrn & Mech, Wuhan 430074, Hubei, Peoples R China.

[Zhang, Limao; Li, Yan; Ashuri, Baabak] Georgia Inst Technol, Sch Bldg Construct, Econ Sustainable Built Environm ESBE Lab, 280 Ferst Dr, Atlanta, GA 30332 USA.

[Zhang, Limao; Li, Yan; Ashuri, Baabak] Georgia Inst Technol, Sch Civil & Environm Engrn, 280 Ferst Dr, Atlanta, GA 30332 USA.

[Stephenson, Robert] Vermont Energy Investment Corp, 128 Lakeside Ave, Suite 401, Burlington, VT 05401 USA.

RP Ashuri, B (reprint author), Georgia Inst Technol, Sch Bldg Construct, Econ Sustainable Built Environm ESBE Lab, 280 Ferst Dr, Atlanta, GA 30332 USA.; Ashuri, B (reprint author), Georgia Inst Technol, Sch Civil & Environm Engrn, 280 Ferst Dr, Atlanta, GA 30332 USA.

EM limao\_zhang@hotmail.com; liyan@gatech.edu; rstephenson@veic.org; baabak@gatech.edu

FU National Science Foundation [1300918, 1441208]

FX This material is based upon work supported by the National Science Foundation under Grants Nos. 1300918 and 1441208.

CR Allen D., 2007, HOME ENERGY, V24, P18

Allouhi A, 2015, J CLEAN PROD, V109, P118, DOI 10.1016/j.jclepro.2015.05.139

Asensio OI, 2017, NAT ENERGY, V2, DOI 10.1038/nenergy.2017.33

Storm P., 2008, COMP COMMERCIAL LEED, P1

BRING J, 1994, AM STAT, V48, P209, DOI 10.2307/2684719

Brounen D, 2011, J ENVIRON ECON MANAG, V62, P166, DOI 10.1016/j.jeem.2010.11.006

Bull R, 2012, ENER BUILDINGS, V50, P103, DOI 10.1016/j.enbuild.2012.03.032

Campbell D, 2014, COMPUT STAT DATA AN, V70, P257, DOI 10.1016/j.csda.2013.09.013

Cannon S.E., 2015, J HOUS RES, V24, P1

Chegut A, 2016, ENER POLICY, V97, P39, DOI 10.1016/j.enpol.2016.06.043

Deng YH, 2012, REG SCI URBAN ECON, V42, P506, DOI 10.1016/j.regsciurbeco.2011.04.004

DINAN TM, 1989, J URBAN ECON, V25, P52, DOI 10.1016/0094-1190(89)90043-0

EIA, 2009, 2009 RECS SURV DAT

Eichholtz P., 2009, REDEFINING ZERO CARB

EPA, 2012, PROF LEAD EN STAR

Field A., 2009, DISCOVERING STAT USI

Fowler K. M., 2008, PNNL17393

Harrington L, 1997, ENER BUILDINGS, V26, P81, DOI 10.1016/S0378-7788(96)01015-8

Harsman B, 2016, ENER BUILDINGS, V133, P711, DOI 10.1016/j.enbuild.2016.10.033

Haurin DR, 1996, J HOUS ECON, V5, P351, DOI 10.1006/jhec.1996.0018

Hoen B., 2011, ANAL EFFECTS RESIDEN

Hoffman AJ, 2008, ORGAN ENVIRON, V21, P390, DOI 10.1177/1086026608326129

IPCC, 2007, 4 ASS REP INT PAN CL

Change IPoC, 2014, CLIM CHANG 2014 IMP

Jeong H, 2015, INT J LIFE CYCLE ASS, V20, P880, DOI 10.1007/s11367-015-0874-y

Kahn ME, 2014, REG SCI URBAN ECON, V47, P25, DOI 10.1016/j.regsciurbeco.2013.07.001

Lee WL, 2004, PROG ENER COMBUST, V30, P477, DOI 10.1016/j.pecc.2004.03.002

Li HX, 2017, ENER BUILDINGS, V138, P666, DOI 10.1016/j.enbuild.2016.12.030

McKnight P.E., 2010, U TEST CORSINI ENCY

Montgomery D. C., 2015, INTRO LINEAR REGRESS

NAIH, 2012, GREEN HOM MARK EXP I

NestAtlanta, 2017, ATL SCH EXPL TOP RAN

Newsham GR, 2009, ENER BUILDINGS, V41, P897, DOI 10.1016/j.enbuild.2009.03.014

Rackes A, 2016, APPL ENER, V174, P256, DOI 10.1016/j.apenergy.2016.04.081

Rey FJ, 2007, ENER BUILDINGS, V39, P709, DOI 10.1016/j.enbuild.2006.07.009

Rode P., 2011, SOARES GONCALVES BUI

Scofield JH, 2013, ENER BUILDINGS, V67, P517, DOI 10.1016/j.enbuild.2013.08.032

Seinre E, 2014, ENER BUILDINGS, V70, P145, DOI 10.1016/j.enbuild.2013.11.048

Sherrod E., 2016, ATLANTA MAGAZINE

Shi XP, 2014, APPL ENER, V133, P135, DOI 10.1016/j.apenergy.2014.07.084

Stuart E., 2011, LBNL5098E, P1

Teng JY, 2016, ENG ECON, V61, P244, DOI 10.1080/0013791X.2015.1041662

Turner C., 2006, P CASCADIA REGION GR  
 Walls M, 2017, NAT ENERGY, V2, DOI 10.1038/nenergy.2017.55  
 Walls M, 2017, J ENVIRON ECON MANAG, V82, P104, DOI 10.1016/j.jeem.2016.11.006  
 Webber CA, 2000, ENER POLICY, V28, P1137, DOI 10.1016/S0301-4215(00)00083-5  
 Wesseh PK, 2017, APPL ENER, V195, P556, DOI 10.1016/j.apenergy.2017.03.006  
 Windsor C, 2015, J HOUS ECON, V29, P41, DOI 10.1016/j.jhe.2015.05.002  
 Worrell E., 2013, ENERGY EFFICIENCY IM  
 Yates D. S., 2017, PRACTICE STAT  
 Zheng SQ, 2012, EUR ECON REV, V56, P974, DOI 10.1016/j.eurocorev.2012.02.012  
 [Anonymous], 2017, SOUTHFACE REMEMBER 1  
 [Anonymous], 2015, SOUTHFACE WHY EARTH  
 NR 53  
 TC 0  
 Z9 0  
 U1 2  
 U2 2  
 PU ELSEVIER SCIENCE SA  
 PI LAUSANNE  
 PA PO BOX 564, 1001 LAUSANNE, SWITZERLAND  
 SN 0378-7788  
 EI 1872-6178  
 J9 ENER BUILDINGS  
 JI Energy Build.  
 PD JAN 1  
 PY 2018  
 VL 158  
 BP 1226  
 EP 1240  
 DI 10.1016/j.enbuild.2017.11.014  
 PG 15  
 WC Construction & Building Technology; Energy & Fuels; Engineering, Civil  
 SC Construction & Building Technology; Energy & Fuels; Engineering  
 GA GA0NF  
 UT WOS:000428010300022  
 DA 2018-05-03  
 ER  
  
 PT J  
 AU Park, ES  
     Hwang, B  
     Ko, K  
     Kim, D  
 AF Park, Eung-Suk  
     Hwang, ByungYong  
     Ko, Kyungwan  
     Kim, Daecheol  
 TI Consumer Acceptance Analysis of the Home Energy Management System  
 SO SUSTAINABILITY  
 LA English  
 DT Article  
 DE Home Energy Management System; Technology Acceptance Model; Partial  
     Least Squares-Structural Equation Modeling  
 ID INFORMATION-TECHNOLOGY USAGE; USER ACCEPTANCE; ELECTRICITY CONSERVATION;  
     PERCEIVED USEFULNESS; MODEL; BEHAVIOR; ADOPTION; BELIEFS; EASE  
 AB The purpose of this paper is to study consumer acceptance of the Home Energy Management System,  
 which is the next generation electronic management system that the Korean government plans to  
 implement in households. The Home Energy Management System is a critical device in maximizing the  
 efficiency of electric energy consumption for each household by using a smart grid. Because it can visualize

real-time price information on the electricity, households can easily monitor and control the amount of electricity consumption. With this feature, the Home Energy Management System can contribute to consumers' total energy savings. This is a major reason why the Korean government wishes to implement it nationwide. Since the Home Energy Management System is a product that applies new technology that has not yet been directly encountered by consumers, there may be a difference in the level of public perception of the Home Energy Management System. Therefore, the impact of consumers' awareness of the Home Energy Management System on their intention to use is important. To do this, the Technology Acceptance Model is utilized in this study. Traditional research on the Technology Acceptance Model includes awareness of usefulness and ease of use as well as intention to use. In contrast, in this research, an extended Technology Acceptance Model with four additional factors—economic benefit, social contribution, environmental responsibility, and innovativeness—that may affect the consumer's awareness of usefulness and ease of use, is proposed. To collect the data, the survey was conducted with 287 respondents. As a result, the proposed model proved to be suitable in explaining the intention to use with a 70.3% explanation power. It is found that economic benefit (0.231) and innovativeness (0.259) impact on usefulness of the Home Energy Management System. Moreover, usefulness (0.551) has a bigger effect on intention to use than ease of use (0.338) does. Based on this, it is desirable for the Korean government to pursue a public relations strategy that emphasizes the economic benefits, social contributions, and environmental responsibility that will be gained when introducing the Home Energy Management System. It is effective to focus on consumers who are inclined to accept innovation. In addition, more effective results can be obtained by referring to the usefulness of the Home Energy Management System rather than referring to ease of use.

C1 [Park, Eung-Suk; Ko, Kyungwan; Kim, Daechol] Hanyang Univ, Coll Business, Seoul 04763, South Korea. [Hwang, ByungYong] Korea Inst Sci & Technol Evaluat & Planning, Off S&T Policy & Planning, Seoul 06775, South Korea.

RP Kim, D (reprint author), Hanyang Univ, Coll Business, Seoul 04763, South Korea.

EM spy0070@hanyang.ac.kr; byhwang@kistep.re.kr; kyungwan.ko@gmail.com; dckim@hanyang.ac.kr

CR ADAMS DA, 1992, MIS QUART, V16, P227, DOI 10.2307/249577

Agarwal R, 2000, MIS QUART, V24, P665, DOI 10.2307/3250951

Agarwal R, 1998, INFORM SYST RES, V9, P204, DOI 10.1287/isre.9.2.204

Arkesteijn K, 2005, ENER POLICY, V33, P183, DOI 10.1016/S0301-4215(03)00209-X

Averdung A., 2011, J BUSINESS MANAGEMEN, V2, P98

Baek S., 2009, BUS REV, V38, P1353

Bhatti T., 2007, J INTERNET BANKING C, V12, P1

Brown TJ, 1997, J MARKETING, V61, P68, DOI 10.2307/1252190

BUSS DM, 1987, J PERS SOC PSYCHOL, V53, P1214, DOI 10.1037/0022-3514.53.6.1214

Celik HE, 2011, J ELECTRON COMMERE, V12, P152

Chen LD, 2002, INFORM MANAGE-AMSTER, V39, P705, DOI 10.1016/S0378-7206(01)00127-6

Childers TL, 2001, J RETAILING, V77, P511, DOI 10.1016/S0022-4359(01)00056-2

COMPEAU DR, 1995, MIS QUART, V19, P189, DOI 10.2307/249688

Darby S., 1999, ENERGY ADVICE WHAT I

DAVIS FD, 1989, MANAGE SCI, V35, P982, DOI 10.1287/mnsc.35.8.982

DAVIS FD, 1989, MIS QUART, V13, P319, DOI 10.2307/249008

Deci EL, 1980, ADV EXPT SOCIAL PSYC, V13, P39, DOI DOI 10.1016/S0065-2601(08)60130-6

Eisen J. B., 2013, SMART REGULATION FED

Fang X, 2012, IEEE COMMUN SURV TUT, V14, P944, DOI 10.1109/SURV.2011.101911.00087

Gefen D, 2003, MIS QUART, V27, P51

Gefen D, 2005, COMMUN ASSOC INF SYS, V16, P91

Gungor VC, 2011, IEEE T IND INFORM, V7, P529, DOI 10.1109/TII.2011.2166794

Kim J, 2011, IEEE POWER ENERGY M, V9, P40, DOI 10.1109/MPE.2010.939166

Kim S. Y, 2011, THESIS

Kranz J., 2011, P 19 EUROPEAN C INFO

LaMarche J., 2011, HOME ENERGY MANAGEME

Leung L., 1998, J COMMUN, V8, P124, DOI [10.1080/01292989809364766, DOI 10.1080/01292989809364766]

Lewis W, 2003, MIS QUART, V27, P657

Limayem M, 2000, IEEE T SYST MAN CY A, V30, P421, DOI 10.1109/3468.852436

Mathieson K, 1991, INFORM SYST RES, V2, P173, DOI 10.1287/isre.2.3.173

MCKENZIEMOHR D, 1994, FUTURES, V26, P224, DOI 10.1016/0016-3287(94)90111-2

Mert W, 2008, CONSUMER ACCEPTANCE  
 Meschtscherjakov A., 2009, P 1 INT C AUT US INT, P81, DOI 10.1145/1620509.1620526  
 Niyato D, 2011, IEEE COMMUN MAG, V49, P53, DOI 10.1109/MCOM.2011.5741146  
 OSKAMP S, 1991, ENVIRON BEHAV, V23, P494, DOI 10.1177/0013916591234005  
 Powers T. L., 1992, J MACROMARKETING, V12, P5, DOI DOI 10.1177/027614679201200202  
 Robinson L, 2005, J BUS RES, V58, P1623, DOI 10.1016/j.jbusres.2004.07.010  
 M Rogers E., 2010, DIFFUSION INNOVATION  
 Selman P. H., 1996, LOCAL SUSTAINABILITY  
 Shih HP, 2004, INFORM MANAGE-AMSTER, V41, P351, DOI 10.1016/S0378-7206(03)00079-X  
 SLAVIN RE, 1981, J APPL BEHAV ANAL, V14, P357, DOI 10.1901/jaba.1981.14-357  
 STERN PC, 1992, AM PSYCHOL, V47, P1224, DOI 10.1037//0003-066X.47.10.1224  
 TAYLOR S, 1995, INFORM SYST RES, V6, P144, DOI 10.1287/isre.6.2.144  
 van der Heijden H, 2004, INFORM MANAGE-AMSTER, V41, P609, DOI 10.1016/j.im.2003.07.001  
 Venkatesh V, 2000, MANAGE SCI, V46, P186, DOI 10.1287/mnsc.46.2.186.11926  
 Wang Y, 2009, MOBISYS'09: PROCEEDINGS OF THE 7TH ACM INTERNATIONAL CONFERENCE ON MOBILE SYSTEMS, APPLICATIONS, AND SERVICES, P179, DOI 10.1016/B978-044306732-7.50020-9  
 WINETT RA, 1978, J APPL PSYCHOL, V63, P73, DOI 10.1037/0021-9010.63.1.73  
 You J., 2010, J INF TECHNOL, V8, P31  
 Zhu K, 2006, MIS QUART, V30, P515

NR 49

TC 0

Z9 0

U1 5

U2 5

PU MDPI AG

PI BASEL

PA ST ALBAN-ANLAGE 66, CH-4052 BASEL, SWITZERLAND

SN 2071-1050

J9 SUSTAINABILITY-BASEL

JI Sustainability

PD DEC

PY 2017

VL 9

IS 12

AR 2351

DI 10.3390/su9122351

PG 15

WC GREEN & SUSTAINABLE SCIENCE & TECHNOLOGY; Environmental Sciences;  
 Environmental Studies

SC Science & Technology - Other Topics; Environmental Sciences & Ecology

GA FR7FA

UT WOS:000419231500197

OA gold

DA 2018-05-03

ER

PT J

AU Semprini, G

Gulli, R

Ferrante, A

AF Semprini, Giovanni

Gulli, Riccardo

Ferrante, Annarita

TI Deep regeneration vs shallow renovation to achieve nearly Zero Energy in existing buildings Energy saving and economic impact of design solutions in the housing stock of Bologna

SO ENERGY AND BUILDINGS

LA English

DT Article

DE nZEBs -; Nearly zero energy buildings; Deep renovation; Energy retrofitting; Urban environment; Social housing

ID MEDITERRANEAN CLIMATE; METHODOLOGY; RETROFITS

AB Whilst new nearly Zero Energy (nZE) concepts have been the first priority in the previous decade, in more recent years it has become widely acknowledged that renovating dwellings will have a large impact on the energy use in buildings. Using a simplified calculation method, this paper illustrates the high-energy consumption in several building types within the housing stock in Bologna. Among these, a specific building has been selected as the worst-case for an in-depth investigation. For this building the paper analyses a large set of possible scenarios for renovation-from the more standard operations up to higher levels of facade components' transformation- as technically feasible solutions to achieve a nearly Zero Energy Building (nZEB).

By discussing the economic/energy impact of each scenario, this paper aims at contributing to the debate on deep-versus-shallow renovation in existing buildings. In particular, it attempts at answering the following important research issues: whether the technical feasibility is associated to the economic feasibility in the retrofitting towards nZEBs; to what extent deep renovation and high transformation of buildings is competitive with respect to shallow retrofit; whether non-energy related factors can be considered to properly assess the economic competitiveness.

Energy and economic benefits are the main renovation's objectives in building renovation; nonetheless, non-energy related aspects are also helpful to expand the feasibility of nZEBs retrofit in the current building practises. (C) 2017 Elsevier B.V. All rights reserved.

C1 [Semprini, Giovanni] Univ Bologna, Sch Engn & Architecture, Dept Ind Engn, DIN, Bologna, Italy.

[Gulli, Riccardo; Ferrante, Annarita] Univ Bologna, Sch Engn & Architecture, Dept Architecture, Bologna, Italy.

RP Semprini, G (reprint author), Univ Bologna, Sch Engn & Architecture, Dept Ind Engn, DIN, Bologna, Italy.

EM giovanni.semprini@unibo.it

CR Attia S, 2012, ENERGBUILDINGS, V49, P2, DOI 10.1016/j.enbuild.2012.01.028

Bettgenhauser K., 2014, DEEP RENOVATION BUIL

Brown HS, 2008, TECHNOL FORECAST SOC, V75, P107, DOI 10.1016/j.techfore.2006.05.014

Dunster B., 2009, THE ZEDBOOK

EN, 2008, 1531642 EN

Evola G, 2014, ENERGBUILDINGS, V68, P7, DOI 10.1016/j.enbuild.2013.09.026

Fabbri K, 2015, ENERGY, V89, P244, DOI 10.1016/j.energy.2015.07.073

Ferrante A., 2012, ADEGUAMENTO ADATTABI

Ferrante A., 2016, URBAN SETTINGS MEDIT, P1

Ferrante A, 2014, SUSTAIN CITIES SOC, V13, P237, DOI 10.1016/j.scs.2014.02.001

Ferrante A, 2012, ADV BUILD ENERGY RES, V6, P81, DOI 10.1080/17512549.2012.672003

Ferrante A, 2011, PROCEDIA ENGINEER, V21, P968, DOI 10.1016/j.proeng.2011.11.2101

Ferreira J, 2013, ENERGPOLICY, V62, P1453, DOI 10.1016/j.enpol.2013.06.082

Hernandez P, 2010, ENERGBUILDINGS, V42, P815, DOI 10.1016/j.enbuild.2009.12.001

[Anonymous], 2010, EU REP

[Anonymous], 2008, 13790 ISO

Kaklauskas A, 2011, LAND USE POLICY, V28, P280, DOI 10.1016/j.landusepol.2010.06.008

Kapsalaki M, 2012, ENERGBUILDINGS, V55, P765, DOI 10.1016/j.enbuild.2012.10.022

Kumbaroglu G, 2012, ENERGBUILDINGS, V49, P327, DOI 10.1016/j.enbuild.2012.02.022

Ma ZJ, 2012, ENERGBUILDINGS, V55, P889, DOI 10.1016/j.enbuild.2012.08.018

Mejer F., 2009, BUILD RES INF, V37

Morelli M, 2012, ENERGBUILDINGS, V54, P395, DOI 10.1016/j.enbuild.2012.07.046

Panao MJNO, 2013, ENERGBUILDINGS, V61, P161, DOI 10.1016/j.enbuild.2013.02.031

Rysanek AM, 2013, ENERGBUILDINGS, V57, P324, DOI 10.1016/j.enbuild.2012.10.027

Santamouris M, 2007, ENERGBUILDINGS, V39, P893, DOI 10.1016/j.enbuild.2006.11.001

Sartori I, 2012, ENERGBUILDINGS, V48, P220, DOI 10.1016/j.enbuild.2012.01.032

Shnapp S., 2013, TECHNICAL REPORT

Torcellini P., 2006, ZERO ENERGY BUILDING

United Nations Environment Programme (UNEP), 2009, BUILD CLIM CHANG SUM

UNI, 2008, 113002 UNI

UNI, 2008, 113001 UNI

[Anonymous], 1994, 10349 UNI



[Anonymous], 2016, AUTORITA PER ENERGIA  
 NR 33  
 TC 0  
 Z9 0  
 U1 6  
 U2 6  
 PU ELSEVIER SCIENCE SA  
 PI LAUSANNE  
 PA PO BOX 564, 1001 LAUSANNE, SWITZERLAND  
 SN 0378-7788  
 EI 1872-6178  
 J9 ENERGBUILDINGS  
 JI Energy Build.  
 PD DEC 1  
 PY 2017  
 VL 156  
 BP 327  
 EP 342  
 DI 10.1016/j.enbuild.2017.09.044  
 PG 16  
 WC Construction & Building Technology; Energy & Fuels; Engineering, Civil  
 SC Construction & Building Technology; Energy & Fuels; Engineering  
 GA FN7GL  
 UT WOS:000416186600031  
 DA 2018-05-03  
 ER

PT J

AU Simanaviciene, Z

Dirma, V

Simanavicius, A

AF Simanaviciene, Zaneta

Dirma, Virgilijus

Simanavicius, Arturas

TI Psychological factors influence on energy efficiency in households

SO OECONOMIA COPERNICANA

LA English

DT Article

DE psychological factors; efficient use of electricity; households

ID LITHUANIA

AB Research background: Most of the studies and their authors focus on the social and economic impacts of energy-saving behavior. However, they do not focus on the psychological factors affecting the efficiency of energy consumption in households. Lithuania has a lack of a unified and justified opinion on psychological factors that affect the energy efficiency of households.

Purpose of the article: The main objective of the article is to identify the psychological factors that influence energy efficiency in households and to identify the appropriate measures to change the individual's energy consumption behavior.

Methods: The article was based on analysis of scientific literature and expert evaluation, when experts selected the most influencing psychological factors. Expert valuation allowed to set the right conditions in which individuals are more easily assimilated by means of energy saving.

Findings: In most cases, economic and technological factors significantly influence household energy consumption. Increased energy-efficient equipment production and supply is causing an energy consumption growth in households, because they are more inclined to buy and use more efficient electrical equipment. An investigation has showed that the energy consumption is strongly influenced by some cultural and psychological factors: with greater public openness to innovation, the households tend to use energy more efficiently. Also, some psychological indicators have significant impact on energy consumption has - frequently the more pronounced neuroticism or extraversion rate. Since the research was performed only in Lithuania, in the future it will seek to carry out an investigation in several countries

and to compare a various factors on the proposed measures and the efficiency of household energy consumption.

- C1 [Simanaviciene, Zaneta] Mykolas Romeris Univ, Ateities St 20, LT-08303 Vilnius, Lithuania.  
 [Dirma, Virgilijus; Simanavicius, Arturas] Lithuanian Sports Univ, Kaunas, Lithuania.  
 RP Simanaviciene, Z (reprint author), Mykolas Romeris Univ, Ateities St 20, LT-08303 Vilnius, Lithuania.  
 EM zasiman@mruni.eu
- CR Abrahamse W., 2011, HUMAN ECOLOGY REV, V18  
 Abrahamse W, 2007, J ENVIRON PSYCHOL, V27, P265, DOI 10.1016/j.jenvp.2007.08.002  
 Akerlof GA, 2009, ANIMAL SPIRITS: HOW HUMAN PSYCHOLOGY DRIVES THE ECONOMY, AND WHY IT MATTERS FOR GLOBAL CAPITALISM, P1  
 Balezentis A, 2011, ENER POLICY, V39, P7322, DOI 10.1016/j.enpol.2011.08.055  
 Bamberg S., 2003, ENV BEHAV, V35  
 Black J. S., 1985, J APPL SOCIAL PSYCHO, V28  
 Brekke K. A., 2008, OXFORD REV EC, V23  
 Brown MA, 2001, ENER POLICY, V29, P1197, DOI 10.1016/S0301-4215(01)00067-2  
 Brownstone D., 2000, TRANSPORTATION RES, V34  
 Darby S, 2006, EFFECTIVENESS FEEDBA  
 De Young R., 1993, ENV BEHAV, V25  
 Dietz T, 2009, P NATL ACAD SCI USA, V106, P18452, DOI 10.1073/pnas.0908738106  
 Dulbeck U., 2004, ENERGY POLICY, V32  
 Ek K., 2005, ENERGY POLICY, V33  
 Elster J, 1996, EC J, V438  
 Faiers A.C., 2006, ENERGY POLICY, V34  
 Faruqui A, 2010, ENERGY, V35, P1598, DOI 10.1016/j.energy.2009.07.042  
 Garmendia E, 2010, ECOL ECON, V69, P1712, DOI 10.1016/j.ecolecon.2010.03.027  
 Gatersleben B., 2002, ENV BEHAV, V34  
 Gifford R, 2011, AM PSYCHOL, V66, P290, DOI 10.1037/a0023566  
 Godwy J. M., 2007, RENSSLAER WORKING P  
 Homans G. C., 1961, SOCIAL BEHAV ITS ELE  
 Howard S, 1969, THEORY BUYER BEHAV  
 Iyer M, 2006, ENER BUILDINGS, V38, P988, DOI 10.1016/j.enbuild.2005.11.009  
 Jager W., 2000, MODELLING CONSUMER B  
 Koppl W., 2004, J EC BEHAV ORG, V3  
 Lee J, 2000, J CONSUMER PSYCHOL, V9  
 Lutzenhiser L., 2009, BEHAV ASSUMPTIONS UN  
 Maibach EW, 2008, AM J PREV MED, V35, P488, DOI 10.1016/j.amepre.2008.08.016  
 Marechal K, 2007, ENER POLICY, V35, P5181, DOI 10.1016/j.enpol.2007.05.009  
 Martinsson J., 2011, ENER POLICY, V39, DOI DOI 10.1016/J.ENPOL.2011.05.046  
 Mohr D, 2000, J SOC ISSUES, V56, DOI [10.1111/0022-4537.00183, DOI 10.1111/0022-4537.00183]  
 Nair G, 2010, ENER POLICY, V38, P2956, DOI 10.1016/j.enpol.2010.01.033  
 Noeren D, 2007, CO2 EMISSION REDUCTI  
 Oikonomou V., 2009, ENERGY POLICY, V11  
 Olson M. E, 1981, J SOCIAL ISSUES, V37  
 Poortiga W., 2003, J ENERGY PSYCHOL, V24  
 Rathzel N, 2009, GLOBAL ENVIRON CHANG, V19, P326, DOI 10.1016/j.gloenvcha.2009.05.001  
 Schiller S. R., 2008, ENERGY EFFICIENCY CL  
 Simanaviciene Z, 2016, EQUILIBRIUM, V11, P145, DOI 10.12775/EQUIL.2016.007  
 Steg L, 2008, ENERGY POLICY, V36  
 Stern P, 2000, J SOCIAL ISSUES, V56  
 Stern P, 2000, AM PSYCHOL, V47  
 Streimikiene D, 2014, RENEW SUST ENER REV, V29, P891, DOI 10.1016/j.rser.2013.08.093  
 Streimikiene D, 2012, RENEW SUST ENER REV, V16, P3613, DOI 10.1016/j.rser.2012.02.045  
 Streimikiene D, 2011, RENEW SUST ENER REV, V15, P4118, DOI 10.1016/j.rser.2011.07.027  
 Tonglet M., 2004, RESOURCES CONSERVATI, V3  
 Wilson Ch., 2007, MODELS DECISION MAKI  
 Zarnikau J, 2003, ENER POLICY, V31, P1661, DOI 10.1016/S0301-4215(02)00232-X

NR 49

TC 0

Z9 0  
U1 0  
U2 0  
PU NICOLAUS COPERNICUS UNIV TORUN  
PI TORUN  
PA JURIIA GAGARINA 11, TORUN, 87-100, POLAND  
SN 2083-1277  
EI 2353-1827  
J9 OECON COPERNIC  
JI Oecon. Copernic.  
PD DEC  
PY 2017  
VL 8  
IS 4  
BP 681  
EP 694  
DI 10.24136/oc.v8i4.41  
PG 14  
WC Economics  
SC Business & Economics  
GA FT7IW  
UT WOS:000423327100012  
OA gold  
DA 2018-05-03  
ER  
FN Clarivate Analytics Web of Science  
VR 1.0  
PT J  
AU Faia, R  
    Pinto, T  
    Abrishambaf, O  
    Fernandes, F  
    Vale, Z  
    Corchado, JM  
AF Faia, Ricardo  
    Pinto, Tiago  
    Abrishambaf, Omid  
    Fernandes, Filipe  
    Vale, Zita  
    Manuel Corchado, Juan  
TI Case based reasoning with expert system and swarm intelligence to  
    determine energy reduction in buildings energy management  
SO ENERGY AND BUILDINGS  
LA English  
DT Article  
DE Artificial intelligence; Case based reasoning; Demand response; Energy  
    efficiency; Intelligent house energy management  
ID ENVIRONMENT; PREDICTION; RETRIEVAL; FRAMEWORK; REUSE  
AB This paper proposes a novel Case Based Reasoning (CBR) application for intelligent management of  
    energy resources in residential buildings. The proposed CBR approach enables analyzing the history of  
    previous cases of energy reduction in buildings, and using them to provide a suggestion on the ideal level  
    of energy reduction that should be applied in the consumption of houses. The innovations of the proposed  
    CBR model are the application of the k-Nearest Neighbors algorithm (k-NN) clustering algorithm to  
    identify similar past cases, the adaptation of Particle Swarm Optimization (PSO) meta-heuristic  
    optimization method to optimize the choice of the variables that characterize each case, and the  
    development of expert systems to adapt and refine the final solution. A case study is presented, which  
    considers a knowledge base containing a set of scenarios obtained from the consumption of a residential  
    building. In order to provide a response for a new case, the proposed CBR application selects the most

similar cases and elaborates a response, which is provided to the SCADA House Intelligent Management (SHIM) system as input data. SHIM uses this specification to determine the loads that should be reduced in order to fulfill the reduction suggested by the CBR approach. Results show that the proposed approach is capable of suggesting the most adequate levels of reduction for the considered house, without compromising the comfort of the users. (C) 2017 Elsevier B.V. All rights reserved.

C1 [Faia, Ricardo; Pinto, Tiago; Abrishambaf, Omid; Fernandes, Filipe; Vale, Zita] Polytech Porto ISEP IPP, GECAD Res Grp Intelligent Engn & Comp Adv Innovat, R Dr Antonio Bernardino de Almeida,431, P-4200072 Oporto, Portugal.

[Pinto, Tiago; Manuel Corchado, Juan] Univ Salamanca, BISITE Res Ctr, Calle Espejo,12, Salmaanca 37007, Spain.

RP Pinto, T (reprint author), GECAD Res Grp Intelligent Engn & Comp Adv Innovat, R Dr Antonio Bernardino de Almeida,431, P-4200072 Oporto, Portugal.

EM tpinto@usal.es

OI Faia, Ricardo/0000-0002-1053-7720; Abrishambaf, Omid/0000-0002-4249-8367

FU European Union's Horizon research and innovation programme under the Marie Skłodowska-Curie [641794, 703689]; FEDER Funds through COMPETE program; National Funds through FO' [UID/EEA/00760/2013]

FX This work has received funding from the European Union's Horizon 2020 research and innovation programme under the Marie Skłodowska-Curie grant agreement No 641794 (project DREAM GO) and a grant agreement No 703689 (project ADAPT); and from FEDER Funds through COMPETE program and from National Funds through FO' under the project UID/EEA/00760/2013.

CR AAMODT A, 1994, AI COMMUN, V7, P39

Bareiss R., 1988, PROTOS UNIFIED APPRO

Bolchini C, 2017, BUILD ENVIRON, V121, P93, DOI 10.1016/j.buildenv.2017.05.014

Castro JL, 2009, INFORM SCIENCES, V179, P1738, DOI 10.1016/j.ins.2009.01.017

De Mantaras RL, 2005, KNOWL ENG REV, V20, P215, DOI 10.1017/S0269888906000646

Deng ZY, 2016, NEUROCOMPUTING, V195, P143, DOI 10.1016/j.neucom.2015.08.112

Dounis AI, 2009, RENEW SUST ENERG REV, V13, P1246, DOI 10.1016/j.rser.2008.09.015

Eberhart R., 1995, MHS'95. Proceedings of the Sixth International Symposium on Micro Machine and Human Science (Cat. No.95TH8079), P39, DOI 10.1109/MHS.1995.494215

European Commission, 2017, CHALL AH RES INN KEY

Faia R, 2016, ADCAIJ-ADV DISTRIB C, V5, P23, DOI 10.14201/ADCAIJ2016512336

Faia R, 2015, INT WORKSHOP DATABAS, P62, DOI 10.1109/DEXA.2015.31

Fernandes F, 2014, ENERG BUILDINGS, V82, P592, DOI 10.1016/j.enbuild.2014.07.067

Garza AGD, 2000, ARTIFICIAL INTELLIGENCE IN DESIGN '00, P393

Im KH, 2007, EXPERT SYST APPL, V32, P77, DOI 10.1016/j.eswa.2005.11.020

Imran M, 2013, PROCEDIA ENGINEER, V53, P491, DOI 10.1016/j.proeng.2013.02.063

Iwano J, 2010, ENERG POLICY, V38, P7744, DOI 10.1016/j.enpol.2010.08.027

Kolodner J., 1993, CASE BASED REASONING

Leake D.B., 1999, EXPERIENCE IS WRONG

Manic M, 2016, IEEE IND ELECTRON M, V10, P24, DOI 10.1109/MIE.2015.2513749

McCarthy J., 1987, FRAME PROBLEM ARTIFI, P3

Missaoui R, 2014, ENERG BUILDINGS, V71, P155, DOI 10.1016/j.enbuild.2013.12.018

Mitchell T. M., 1997, MACHINE LEARNING

Oliveira P., 2012, IEEE POW EN SOC GEN, P1

Park YJ, 2006, EXPERT SYST, V23, P2, DOI 10.1111/j.1468-0394.2006.00321.x

Platon R, 2015, ENERG BUILDINGS, V92, P10, DOI 10.1016/j.enbuild.2015.01.047

Rodrigues C, 2017, J CLEAN PROD, V157, P94, DOI 10.1016/j.jclepro.2017.04.104

SCHAAF JW, 1996, ADV CAS BAS REAS 3, V1168, P362

Schank R.C., 1983, DYNAMIC MEMORY THEOR

Sharma I, 2016, ENERG BUILDINGS, V130, P55, DOI 10.1016/j.enbuild.2016.08.009

Shin KS, 1999, EXPERT SYST APPL, V16, P85, DOI 10.1016/S0957-4174(98)00063-3

Soares N, 2017, RENEW SUST ENERG REV, V77, P845, DOI 10.1016/j.rser.2017.04.027

Veloso M.M., 1994, MACHINE LEARNING MUL, VIV, P523

Wagner WP, 2017, EXPERT SYST APPL, V76, P85, DOI 10.1016/j.eswa.2017.01.028

Wang ZY, 2017, RENEW SUST ENERG REV, V75, P796, DOI 10.1016/j.rser.2016.10.079

Xiao X, 2017, ENRGY PROCED, V111, P427, DOI 10.1016/j.egypro.2017.03.203

Xin JB, 2009, INTERNATIONAL JOINT CONFERENCE ON COMPUTATIONAL SCIENCES AND OPTIMIZATION, VOL 1, PROCEEDINGS, P505, DOI 10.1109/CSO.2009.420

Yu Z, 2016, SUSTAIN CITIES SOC, V25, P33, DOI 10.1016/j.scs.2015.12.001

Zhang W, 2016, APPL SOFT COMPUT, V38, P75, DOI 10.1016/j.asoc.2015.09.030

NR 38

TC 0

Z9 0

U1 7

U2 7

PU ELSEVIER SCIENCE SA

PI LAUSANNE

PA PO BOX 564, 1001 LAUSANNE, SWITZERLAND

SN 0378-7788

EI 1872-6178

J9 ENERGBUILDINGS

J1 Energy Build.

PD NOV 15

PY 2017

VL 155

BP 269

EP 281

DI 10.1016/j.enbuild.2017.09.020

PG 13

WC Construction & Building Technology; Energy & Fuels; Engineering, Civil

SC Construction & Building Technology; Energy & Fuels; Engineering

GA FL3FB

UT WOS:000414107200025

DA 2018-05-03

ER

PT J

AU Ahn, J

Cho, S

AF Ahn, Jonghoon

Cho, Soolyeon

TI Development of an intelligent building controller to mitigate indoor thermal dissatisfaction and peak energy demands in a district heating system

SO BUILDING AND ENVIRONMENT

LA English

DT Article

DE Intelligent building control; Energy savings; Indoor thermal environment; Peak demands; Temperature prediction; District heating system

ID CONTROL STRATEGIES; FUZZY CONTROL; HVAC SYSTEMS; ENVIRONMENT; PERFORMANCE

AB District heating systems were gradually improved with the development of generation, storage, distribution technologies, and the demands continued to expand significantly. The percentage of houses supplied by district heating systems were fast grown up, and it was reported that the global market for the systems would expand by about 6% in the period between 2016 and 2024.

However, most studies for district heating models focused on fuel use in plants, energy distribution, and carbon reduction. Many simulations adopting computing technologies dealt with mechanical performances in the systems. Also, recent statistical analyses overlooked zone-scaled thermal comfort directly affecting users' workability in buildings.

This research proposes an intelligent controller to improve thermal comfort and reduce peak energy demands in a district heating system. An artificial intelligence based model with temperature and thermal comfort detectors optimizes supply air conditions to maintain desired room temperature responding to users' characteristics in four different building types. The model reduces peak demands for cooling and

heating to optimize plant and distribution capacity. Comparative analyses describe the model's effectiveness that it improves thermal comfort level by 27%, and that it reduces peak energy demands by 30% in comparison with a conventional on/off controller. The model has an advantage that it properly responds to temperature changes with high performance to mitigate thermal dissatisfaction and energy loss. In spite of the sensitive controls to ensure human comfort, it is confirmed that the model can contribute to design optimization for energy supply systems in urban scaled models. (C) 2017 Elsevier Ltd. All rights reserved.

C1 [Ahn, Jonghoon; Cho, Soolyeon] North Carolina State Univ, Raleigh, NC 27695 USA.

RP Ahn, J (reprint author), North Carolina State Univ, Raleigh, NC 27695 USA.

EM architectism@gmail.com

CR Ahn J, 2017, APPL ENERG, V190, P222, DOI 10.1016/j.apenergy.2016.12.155

Alcala R, 2003, APPL INTELL, V18, P155, DOI 10.1023/A:1021986309149

ASHRAE, 2004, 552004 ASHRAE

Bojic M, 2000, BUILD ENVIRON, V35, P151, DOI 10.1016/S0360-1323(99)00013-X

Braun JE, 2001, HVAC&R RES, V7, P403, DOI 10.1080/10789669.2001.10391283

Castilla M, 2013, BUILD ENVIRON, V59, P107, DOI 10.1016/j.buildenv.2012.08.012

Chen X, 2016, APPL ENERG, V164, P341, DOI 10.1016/j.apenergy.2015.11.065

[Anonymous], 2000, 8 STEPS CONTR HEAT S

Danfoss, 2016, WHAT IS DISTR HEAT

DOUNIS AI, 1995, ENERGBUILDINGS, V22, P81, DOI 10.1016/0378-7788(94)00902-V

[Anonymous], 2016, REC IND TEMP SUMM WI

[Anonymous], 2013, FUZZY SYST

Forsberg A, 2004, BUILD ENVIRON, V39, P223, DOI 10.1016/j.buildenv.2003.09.004

[Anonymous], 2010, APPL ENERG

[Anonymous], 1998, FUZZY SYSTEMS

Hussain S, 2014, CONTROL ENG PRACT, V32, P172, DOI 10.1016/j.conengprac.2014.08.007

IDEA, 2016, WHAT IS DISTR EN

[Anonymous], 2016, ENERGY BUILD

[Anonymous], 2002, THERM COMF

[Anonymous], 2016, QUICK INTRO CS231N C

Koivo H, 2008, NEURAL NETWORKS BASI

Kolokotsa D, 2003, BUILD ENVIRON, V38, P1439, DOI 10.1016/S0360-1323(03)00130-6

Koulani C, 2014, 10 NORD S BUILD PHYS, P822

Kumar S, 2016, BUILD ENVIRON, V109, P135, DOI 10.1016/j.buildenv.2016.09.023

Lauster M, 2014, BUILD ENVIRON, V73, P223, DOI 10.1016/j.buildenv.2013.12.016

Lianzhong L, 2007, BUILD SERV ENG RES T, V28, P35, DOI 10.1177/0143624406071105

Liew PY, 2016, APPL ENERG, V184, P1350, DOI 10.1016/j.apenergy.2016.05.078

[Anonymous], 2013, BUILD ENVIRON

[Anonymous], 2014, ENERGY

Maffezzoni C, 1997, CONTROL ENG PRACT, V5, P301, DOI 10.1016/S0967-0661(97)00007-5

Martinez-Molina A, 2017, BUILD ENVIRON, V117, P248, DOI 10.1016/j.buildenv.2017.03.010

Marvuglia A, 2014, BUILD ENVIRON, V72, P287, DOI 10.1016/j.buildenv.2013.10.020

[Anonymous], 2017, BUILD ENVIRON

Nematchoua MK, 2014, APPL ENERG, V114, P687, DOI 10.1016/j.apenergy.2013.10.036

Ozgener L, 2005, BUILD ENVIRON, V40, P1309, DOI 10.1016/j.buildenv.2004.11.001

[Anonymous], 2015, ENERGY BUILD

[Anonymous], 2008, INTR NEUR NETW

[Anonymous], 1991, APPL GEN PREDICTIVE

Sartor K, 2014, APPL ENERG, V130, P474, DOI 10.1016/j.apenergy.2014.01.097

Skagestad B, 1999, DISTRICT HEATING COO

Skrjanc I, 2001, BUILD ENVIRON, V36, P1023, DOI 10.1016/S0360-1323(00)00053-6

[Anonymous], 1995, BUILD ENVIRON

Soyguder S, 2009, EXPERT SYST APPL, V36, P8631, DOI 10.1016/j.eswa.2008.10.033

[Anonymous], 2006, DISTR HEAT COOL MARK

USEIA, 2015, ANN EN OUTL 2015

USEIA, 2016, MUCH EN IS CONS RES

[Anonymous], 2013, BUILD ENVIRON

[Anonymous], 2009, BUILD ENVIRON

[Anonymous], 2007, BUILD ENVIRON

Zhang J, 2003, ASHRAE, P13

NR 50

TC 0

Z9 0

U1 9

U2 9

PU PERGAMON-ELSEVIER SCIENCE LTD

PI OXFORD

PA THE BOULEVARD, LANGFORD LANE, KIDLINGTON, OXFORD OX5 1GB, ENGLAND

SN 0360-1323

EI 1873-684X

J9 BUILD ENVIRON

J1 Build. Environ.

PD NOV 1

PY 2017

VL 124

BP 57

EP 68

DI 10.1016/j.buildenv.2017.07.040

PG 12

WC Construction & Building Technology; Engineering, Environmental;  
Engineering, Civil

SC Construction & Building Technology; Engineering

GA F18KV

UT WOS:000412252400005

DA 2018-05-03

ER

PT J

AU Bariss, U

Bazbauers, G

Blumberga, A

Blumberga, D

AF Bariss, Uldis

Bazbauers, Gatis

Blumberga, Andra

Blumberga, Dagnija

TI System Dynamics Modeling of Households' Electricity Consumption and  
Cost-Income Ratio: a Case Study of Latvia

SO ENVIRONMENTAL AND CLIMATE TECHNOLOGIES

LA English

DT Article

DE Consumer behavior; electricity; energy efficiency; households; system  
dynamics

ID BEHAVIOR; TRANSITIONS

AB Increased energy efficiency of the building sector is high on the list of priorities for energy policy since better energy efficiency would help to reduce impact on climate change and increase security of energy supply. One aim of the present study was to find a relative effect of growth of demand for energy services due to changes in income, energy consumption per unit of demand due to technological development, changes in electricity price and household income on household electricity consumption in Latvia. The method applied included system dynamics modeling and data from a household survey regarding the relationship between electricity saving activities and the electricity cost-income ratio. The results revealed that, in direct contrast to the expected, a potential reduction of the electricity consumption is rather insensitive to electricity price and electricity cost-income ratio, and that the efficiency of technologies could be the main drivers for future electricity savings. The results suggest that support to advancement of technologies and faster replacement of inefficient ones rather than influencing the energy price could be

effective energy policy measures. The model, developed in the study could be used in similar assessments in other countries.

C1 [Bariss, Uldis; Bazbauers, Gatis; Blumberga, Andra; Blumberga, Dagnija] Riga Tech Univ, Inst Energy Syst & Environm, Azenes Iela 12-1, LV-1048 Riga, Latvia.

RP Bariss, U (reprint author), Riga Tech Univ, Inst Energy Syst & Environm, Azenes Iela 12-1, LV-1048 Riga, Latvia.

EM uldis.bariss@latvenergo.lv

FU Latvia's National Research Program's project "Latenergi"

FX This study was supported by Latvia's National Research Program's project "Latenergi." The authors would also like to thank Mr. Toms Prodanuks for handling the household survey data and Ms. Lelde Timma for help in the review of information sources.

CR Barlas Y, 1996, SYST DYNAM REV, V12, P183, DOI 10.1002/(SICI)1099-1727(199623)12:3<183::AID-SDR103>3.3.CO;2-W

Bazbauers Gatis, 2015, Energetika, V61, P108

Berzina K., 2013, ENERGOEFEKTIVA APGAI

Central Statistical Bureau of Latvia, DAT

Chappin E JL, 2013, ENVIRON INNOV SOC TR, V7, P16, DOI 10.1016/j.eist.2012.11.005

Dyner I., 2007, P 2007 INT C SYST DY, P1

Ford A, 1997, SYST DYNAM REV, V13, P57, DOI 10.1002/(SICI)1099-1727(199721)13:1<57::AID-SDR117>3.3.CO;2-2

Frederiks ER, 2015, RENEW SUST ENERG REV, V41, P1385, DOI 10.1016/j.rser.2014.09.026

Funds I., 2016, CLEAN ENERGY ALL NEW

He YX, 2011, ENERGY, V36, P1115, DOI 10.1016/j.energy.2010.11.038

Krishnamurthy CKB, 2015, RESOUR ENERGY ECON, V39, P68, DOI 10.1016/j.reseneeco.2014.12.002

Laicane I, 2015, ENRGY PROCED, V72, P285, DOI 10.1016/j.egypro.2015.06.041

Manjunath M, 2014, ENRGY PROCED, V54, P541, DOI 10.1016/j.egypro.2014.07.295

Mills B, 2014, ENRGY ECON, V46, P151, DOI 10.1016/j.eneco.2014.08.022

Papachristos G, 2015, ENRGY BUILDINGS, V86, P403, DOI 10.1016/j.enbuild.2014.09.077

Poznaka L, 2015, ENRGY PROCED, V72, P79, DOI 10.1016/j.egypro.2015.06.012

Reveiu A, 2015, PROCEDIA COMPUT SCI, V52, P812, DOI [10.1016/j.procs.2015.05.137, 10.1016/j.procs.2015.05.137]

Schultz PW, 2015, ENERGY, V90, P351, DOI 10.1016/j.energy.2015.06.130

Siemens A, 2009, EUROPEAN GREEN CITY

Timma L, 2016, ENRGY PROCED, V95, P517, DOI 10.1016/j.egypro.2016.09.078

Vesterberg M, 2016, ENRGY J, V37, P141, DOI 10.5547/01956574.37.4.mves

NR 21

TC 0

Z9 0

U1 0

U2 0

PU DE GRUYTER OPEN LTD

PI WARSAW

PA BOGUMILA ZUGA 32A ST, 01-811 WARSAW, POLAND

SN 1691-5208

EI 2255-8837

J9 ENVIRON CLIM TECHNOL

JI Environ. Clim. Technol.

PD NOV

PY 2017

VL 20

IS 1

SI SI

BP 36

EP 50

DI 10.1515/rtulect-2017-0009

PG 15

WC GREEN & SUSTAINABLE SCIENCE & TECHNOLOGY



SC Science & Technology - Other Topics

GA FO9FH

UT WOS:000417192900003

OA gold

DA 2018-05-03

ER

PT J

AU Cohen, R

Austin, B

Bannister, P

Bordass, B

Bunn, R

AF Cohen, Robert

Austin, Barry

Bannister, Paul

Bordass, Bill

Bunn, Roderic

TI How the commitment to disclose in-use performance can transform energy outcomes for new buildings

SO BUILDING SERVICES ENGINEERING RESEARCH & TECHNOLOGY

LA English

DT Article

DE Design for performance; base building; Commitment Agreement; energy performance; energy rating; energy performance disclosure

AB The paper describes the transformation that has taken place over the last 15 years in the energy efficiency of new office buildings constructed in Australia and considers if and how the UK could follow suit. The success in Australia has been greatest for the 'base building': the energy performance of the HVAC services in tenanted spaces and of all end uses in the common parts. It embraces a 'design for performance' culture, supported by the NABERS Commitment Agreement', where developers and their teams sign up to an in-use performance target. The process is underpinned by advanced simulation, strategic sub-metering and fine-tuning post occupation to help eliminate wasteful deviations. The paper considers the opportunity for the UK to introduce a Commitment Agreement process for new office buildings, integrated with the Soft Landings Framework. It is argued that from a technical perspective base building energy performance in new UK offices could be as good as it is in Australia. However, there are non-technical drivers missing in the UK. To compete with their Australian peers, the UK property and construction industries need a base building energy measurement and rating system, creating the ability to set a performance target and disclose the outcome. Practical application: Design for performance uses a much more realistic building simulation model at the design stage. Although this requires a lot more inputs (details of the building's proposed chillers, AHUs, ducts and valves, etc. and their controls), it enables the designers to capitalise from computer-aided-design to improve energy efficiency. This process deploys the technology improvement template by which much of the modern world has progressed so fast, and enables innovation to flourish. The more advanced HVAC model can predict target energy budgets for each sub-system (boilers, chillers, fans, pumps, etc.) against which the actual energy used, as measured with sub-meters, can be compared to inform fine tuning during early operation. Although a model's predictions can be considered the ideal energy performance of the as-built system, there's an expectation that the base building's real performance should turn out to be within around 10% of that anticipated from the modelling.

C1 [Cohen, Robert] Verco, Corsham, Wilts, England.

[Austin, Barry] Arup, London, England.

[Bannister, Paul] Energy Act, Canberra, ACT, Australia.

[Bordass, Bill] Usable Bldg Trust, London, England.

[Bunn, Roderic] Bartlett Sch Environm Energy & Resources, London, England.

RP Cohen, R (reprint author), Verco Ltd, Corsham SN13 9TZ, Wilts, England.

EM robert.cohen@vercoglobal.com

CR Australian Property Institute, 2011, BUILD BETT RET STUD

Bordass B, 2014, BG54 2014 SOFT LANDI

Bordass WT, 1995, 395 BRE

Bunn R, 2011, PITSTOPPING  
 Cohen R, 2015, BUILD RES INF, V43, P534, DOI 10.1080/09613218.2015.1017416  
 [Anonymous], 1998, EN CONS GUID 19 EN U  
 Hong S-M, 2013, ANAL DISPLAY ENERGY  
 IPD/Department of Industry, 2014, NABERS EN OFF MARK A  
 von Weizsacker E., 1998, FACTOR 4 DOUBLING WE  
 Winston Jonathan, 2016, COMMUNICATION  
 [Anonymous], 2015, IMPAX ASSET MANAGEME  
 [Anonymous], 2013, 54 CIBSE  
 NR 12  
 TC 0  
 Z9 0  
 U1 1  
 U2 1  
 PU SAGE PUBLICATIONS LTD  
 PI LONDON  
 PA 1 OLIVERS YARD, 55 CITY ROAD, LONDON EC1Y 1SP, ENGLAND  
 SN 0143-6244  
 EI 1477-0849  
 J9 BUILD SERV ENG RES T  
 JI Build Serv. Eng. Res. Technol.  
 PD NOV  
 PY 2017  
 VL 38  
 IS 6  
 SI SI  
 BP 711  
 EP 727  
 DI 10.1177/0143624417711343  
 PG 17  
 WC Construction & Building Technology  
 SC Construction & Building Technology  
 GA FN2HI  
 UT WOS:000415811600006  
 DA 2018-05-03  
 ER  
  
 PT J  
 AU Yu, Z  
     Hu, B  
     Sun, YJ  
     Li, AB  
     Li, J  
     Zhang, GQ  
 AF Yu, Zhun (Jerry)  
     Hu, Bin  
     Sun, Yongjun  
     Li, Anbang  
     Li, Jun  
     Zhang, Guoqiang  
 TI Standby energy use and saving potentials associated with occupant  
    behavior of chinese rural homes  
 SO ENERGY AND BUILDINGS  
 LA English  
 DT Article  
 DE Standby energy use; Occupant behavior; Data mining; Energy-saving  
    potential; Household appliance  
 ID POWER

AB A deep understanding of household appliance standby energy use (SEU) and associated saving potentials in Chinese rural areas is vitally important due to the huge amounts of households and appliances. However, to date, few study has been conducted and very little is known about the SEU. Meanwhile, existing methods of estimating such saving potentials have two limitations. Firstly, they primarily evaluated it through upgrading appliances while a more practical way of improving behavior should also be considered. Secondly, they do not take the impact of its influential factors into account simultaneously, and tend to significantly decrease the estimation accuracy. To address the above issues, an investigation on the appliance SEU and its influential factors in Chinese rural homes was first conducted. Then, a data mining-based method for estimating the saving potentials was proposed, and improving occupant behavior pertaining to SEU was also considered in the estimation. The method was further applied under three typical scenarios: appliance upgrades, behavior change and the combination of both. In addition, barriers to promote standby energy reductions have been analyzed and corresponding recommendations have been made. Main contributions of this study include: (1) providing SEU of Chinese rural homes and estimating saving potentials caused by various ways including behavior change and, (2) a new method of estimating energy-saving potentials with improved accuracy. (C) 2017 Elsevier B.V. All rights reserved.

C1 [Yu, Zhun (Jerry); Hu, Bin; Li, Jun; Zhang, Guoqiang] Hunan Univ, Coll Civil Engrn, Changsha 410082, Hunan, Peoples R China.

[Sun, Yongjun; Li, Anbang] City Univ Hong Kong, Div Bldg Sci & Technol, Kowloon, Hong Kong, Peoples R China.

RP Sun, YJ (reprint author), City Univ Hong Kong, Div Bldg Sci & Technol, Kowloon, Hong Kong, Peoples R China.

EM yongjsun@cityu.edu.hk

FU Early Career Scheme [CityU 21207915]; Natural Science Foundation of China [51408205]; Fundamental Research Funds for the Central Universities

FX The research work presented in this paper is jointly supported by the Early Career Scheme (CityU 21207915), the Natural Science Foundation of China (Project No. 51408205) and the Fundamental Research Funds for the Central Universities.

CR Building Energy Research Center of Tsinghua University, 2016, ANN REP CHIN BUILD E

Burgett JM, 2015, ENERGY RES SOC SCI, V6, P87, DOI 10.1016/j.erss.2014.12.006

CNBS, 2015, CHIN STAT YB 2015

Coleman M, 2012, ENERGBUILDINGS, V54, P61, DOI 10.1016/j.enbuild.2012.06.008

Consult Energy, AN STANDB EN EFF IMP

Deng Julong, 1989, Journal of Grey Systems, V1, P1

Guan L, 2011, ENERGBUILDINGS, V43, P485, DOI 10.1016/j.enbuild.2010.10.013

Han J., 2006, DATA MINING CONCEPTS

He BJ, 2014, SUSTAIN CITIES SOC, V11, P7, DOI 10.1016/j.scs.2013.11.005

Jiang Y., 2015, ANN REPORT CHINA BUI

Kilpatrick RAR, 2011, APPL ENERGB, V88, P612, DOI 10.1016/j.apenergy.2010.08.002

Lu TK, 2011, ENERGBUILDINGS, V43, P3539, DOI 10.1016/j.enbuild.2011.09.019

Meier A, 2004, ENERGBUILDINGS, V36, P1211, DOI 10.1016/enbuild.2003.10.011

Meier A. K., 1999, ONE WATT INITIATIVE

National Awareness of Energy STAR, 2016, CONS EN EFF US EPA

Sahin MC, 2014, APPL ENERGB, V114, P531, DOI 10.1016/j.apenergy.2013.10.021

Shimoda Y, 2010, APPL ENERGB, V87, P1944, DOI 10.1016/j.apenergy.2009.10.021

Yu Z, 2011, ENERGY, V36, P6596, DOI 10.1016/j.energy.2011.09.002

[Anonymous], 2002, P S HIGHL EFF EN RED

NR 19

TC 0

Z9 0

U1 6

U2 6

PU ELSEVIER SCIENCE SA

PI LAUSANNE

PA PO BOX 564, 1001 LAUSANNE, SWITZERLAND

SN 0378-7788

EI 1872-6178

## J9 ENERGBUILDINGS

JI Energy Build.

PD NOV 1

PY 2017

VL 154

BP 295

EP 304

DI 10.1016/j.enbuild.2017.08.070

PG 10

WC Construction &amp; Building Technology; Energy &amp; Fuels; Engineering, Civil

SC Construction &amp; Building Technology; Energy &amp; Fuels; Engineering

GA FK6IN

UT WOS:000413607400025

DA 2018-05-03

ER

PT J

AU Patrao, C

de Almeida, AT

Harrison, B

Schlomann, B

Damnics, M

Fonseca, P

AF Patrao, Carlos

de Almeida, Anibal T.

Harrison, Bob

Schlomann, Barbara

Damnics, Melissa

Fonseca, Paula

TI Low power mode energy demand of household appliances-SELINA and APP projects

SO ENERGY EFFICIENCY

LA English

DT Review

DE Standby power; Network standby; Low power mode; Electronic appliances;

Entertainment appliances; Information and communication technology;

Energy efficiency; Internet of Things

ID ELECTRICITY CONSUMPTION; POTENTIALS

AB In the last decades, it has been recognized that energy consumption in low power modes for electrical and electronic products is an important issue. There is a need to expand energy efficiency efforts beyond simple standby modes into the new more complex area of networks, thus tackling the new paradigm of living based on the Internet of Things. The European project SELINA carried out a large scale in store monitoring campaign, measuring about 6300 different equipment. Since then, there is no reference to other similar market surveillance studies being carried out in Europe. In Asia, a market surveillance campaign performed by the Asia Pacific Partnership with measurements on a regular basis has been very successful. SELINA results show that 18.5% of the measured products present power values higher than the 2010 EC 1275/2008 regulation threshold in off-mode, and for standby this value reached 31%. When a comparison is made with the 2013 EC 1275/2008 regulation threshold, these values increase twice. The Asia Pacific Partnership results alert policy makers that low passive standby does not guarantee low active standby. Several studies indicate that consumer electronic products are becoming more efficient and their energy consumption is decreasing. However, because the ownership of appliances is also increasing, these improvements in energy efficiency do not seem to have significant impact in the overall consumption of the households. In addition, there is evidence that not all appliances in the market reach the performance announced by the manufacturers. Recent measurements carried out by the Natural Resources Defense Council on flat screen TVs revealed that their real energy consumption seems to be higher than announced in the label. This shows the urgent need for measurement campaigns, since no market surveillance is being carried out on regular basis, and trusting the manufacturer's data seems to be unreliable.

C1 [Patrao, Carlos; de Almeida, Anibal T.; Fonseca, Paula] Univ Coimbra, Coimbra, Portugal.

[Harrison, Bob] Intertek, London, England.  
 [Schlomann, Barbara] Fraunhofer ISI, Karlsruhe, Germany.  
 [Dammics, Melissa] Maia Consulting, Melbourne, Vic, Australia.  
 RP Patrao, C (reprint author), Univ Coimbra, Coimbra, Portugal.  
 EM carlospatrao@isr.uc.pt  
 OI Almeida, Anibal/0000-0002-3641-5174; Patrao, Carlos/0000-0001-5495-8714  
 FU European Union  
 FX The SELINA Project was co-financed by the Intelligent Energy Europe Programme of the European Union.  
 CR Asia Pacific Partnership, 2011, STANDBY REPO  
 Bertoldi P., 2012, ELECTRICITY CONSUMPTION  
 Bertoldi P., 2015, 8 INT C EN EFF DOM A  
 Burgett JM, 2015, ENERGY RES SOC SCI, V6, P87, DOI 10.1016/j.erss.2014.12.006  
 Consulting Maia, 2011, DEC AUSTRALIA SURV  
 De Almeida A, 2012, ENERGY BUILDINGS, V47, P151, DOI 10.1016/j.enbuild.2011.11.053  
 de Almeida A, 2011, ENERGY BUILDINGS, V43, P1884, DOI 10.1016/j.enbuild.2011.03.027  
 EuP Lot6, 2007, FRAUNHOFER IZM EUP P  
 European Commission, 2017, EN EFF PROD  
 Federal Ministry for Economic Affairs and Energy (BMWi), 2014, EN EFF ICT SMES ADM  
 Firth S, 2008, ENERGY BUILDINGS, V40, P926, DOI 10.1016/j.enbuild.2007.07.005  
 Freire-Gonzalez J, 2017, ENERGY POLICY, V102, P270, DOI 10.1016/j.enpol.2016.12.002  
 Gadgets and Gigawatts, 2009, IEA INT EN AG GADG G  
 Guan L, 2011, ENERGY BUILDINGS, V43, P485, DOI 10.1016/j.enbuild.2010.10.013  
 Harrington L., 2014, NETWORK STANDBY REPO  
 Hiller C, 2015, ENERGY BUILDINGS, V87, P243, DOI 10.1016/j.enbuild.2014.11.013  
 IEA 4E, 2012, 4E IEA  
 IEA 4E EDNA, 2016, EN EFF INT THINGS TE  
 Kwatra S, 2013, MISCELLANEOUS ENERGY  
 Meier A., 1999, 1999 SUMMER STUDY EU  
 NRDC, 2016, SECTOR COSTS MAN EXPL  
 OECD/IEA, 2014, MOR DAT LESS EN MAK  
 Pothitou M, 2017, RENEW SUST ENERGY REV, V69, P843, DOI 10.1016/j.rser.2016.11.100  
 Sahin MC, 2014, APPL ENERGY, V114, P531, DOI 10.1016/j.apenergy.2013.10.021  
 Schlomann B., 2015, INT J DECISION SUPPORT, V1  
 SELINA European Project, 2008, IEE07563SI2499206 SE  
 Urban B., 2011, ENERGY CONSUMPTION C  
 Urban B., 2014, ENERGY CONSUMPTION C  
 [Anonymous], 2011, EUP PREP STUD LOT26  
 NR 29  
 TC 0  
 Z9 0  
 U1 3  
 U2 4  
 PU SPRINGER  
 PI DORDRECHT  
 PA VAN GODEWIJCKSTRAAT 30, 3311 GZ DORDRECHT, NETHERLANDS  
 SN 1570-646X  
 EI 1570-6478  
 J9 ENERGY EFFIC  
 JI Energy Effic.  
 PD OCT  
 PY 2017  
 VL 10  
 IS 5  
 BP 1299  
 EP 1314  
 DI 10.1007/s12053-017-9518-3  
 PG 16

WC GREEN & SUSTAINABLE SCIENCE & TECHNOLOGY; Energy & Fuels; Environmental Studies

SC Science & Technology - Other Topics; Energy & Fuels; Environmental Sciences & Ecology

GA FI3MF

UT WOS:000411865800016

DA 2018-05-03

ER

PT J

AU Timma, L

Bazbauers, G

Bariss, U

Blumberga, A

Blumberga, D

AF Timma, Lelde

Bazbauers, Gatis

Bariss, Uldis

Blumberga, Andra

Blumberga, Dagnija

TI Energy efficiency policy analysis using socio-technical approach and system dynamics. Case study of lighting in Latvia's households

SO ENERGY POLICY

LA English

DT Article

DE System dynamics; Modelling; Lighting sector; Energy efficiency; Consumer behaviour

ID MODEL; TRANSITIONS; SECTOR

AB Worldwide the lighting sector demands around 1/5 of total electricity used. While the diffusion of new lighting technologies occurs quickly and prices for these technologies drop, at the same time around 1/3 of households in developed European countries continue to choose incandescent light bulbs. This phenomena shows a large potential for saving electricity. Therefore, the aim of our research is to model the diffusion of innovation for energy efficiency solutions in households in Latvia. The methodology combines an empirical study with system dynamics modelling. The model showed that electricity consumption in households decreased by 14% from the year 2015 until the year 2040. The sensitivity analysis shows that changes in the parameters used in this analysis caused expected behaviour, where the uncertainty in electricity consumption in households accounted for +/- 16% in the year 2040. Although this developed system dynamics model was based on a specific process of diffusion of innovation, its general application to other products and services is possible, since the developed model serves as a white-box. The structure of the model can be used for other studies; the model can be enhanced with the newest results or adapted for other case studies.

C1 [Timma, Lelde; Bazbauers, Gatis; Bariss, Uldis; Blumberga, Andra; Blumberga, Dagnija] Riga Tech Univ, Inst Energy Syst & Environm, Azenes Iela 12-1, LV-1048 Riga, Latvia.

RP Bazbauers, G (reprint author), Riga Tech Univ, Inst Energy Syst & Environm, Azenes Iela 12-1, LV-1048 Riga, Latvia.

EM gatis.bazbauers@rtu.lv

FU National Research Program

FX The work has been supported by National Research Program "Energy efficient and low-carbon solutions for a secure, sustainable and climate variability reducing energy supply (LATENERGI)".

CR Aman MM, 2013, ENERG POLICY, V52, P482, DOI 10.1016/j.enpol.2012.09.068

Baubauers G., 2016, ENERGETIKA, V61

Barlas Y, 1996, SYST DYNAM REV, V12, P183, DOI 10.1002/(SICI)1099-1727(199623)12:3<183::AID-SDR103>3.3.CO;2-W

BASS FM, 1969, MANAGE SCI, V15, P215, DOI 10.1287/mnsc.15.5.215

Chappin EIJL, 2013, ENVIRON INNOV SOC TR, V7, P16, DOI 10.1016/j.eist.2012.11.005

CSB, 2016, STAT DAT

De Almeida A, 2014, RENEW SUST ENERG REV, V34, P30, DOI 10.1016/j.rser.2014.02.029

D. E. A. E. P. C. European, 2015, EUR LED MARK EV POL  
 Forrester J. W., 1961, INDUSTRIAL DYNAMICS  
 Franceschini S, 2015, TECHNOL FORECAST SOC, V92, P69, DOI 10.1016/j.techfore.2014.11.007  
 Frederiks ER, 2015, RENEW SUST ENERG REV, V41, P1385, DOI 10.1016/j.rser.2014.09.026  
 GREASLEY P, 2008, QUANTITATIVE DATA AN  
 Hosmer David W., APPL LOGISTIC REGRES  
 Karakaya E, 2014, RENEW SUST ENERG REV, V33, P392, DOI 10.1016/j.rser.2014.01.083  
 Kaulina A., 2014, LATVIJAS RADIO  
 Khan N, 2011, RENEW SUST ENERG REV, V15, P296, DOI 10.1016/j.rser.2010.07.072  
 Mills B, 2014, ENERG ECON, V46, P151, DOI 10.1016/j.eneco.2014.08.022  
 Mylan J, 2015, J CLEAN PROD, V97, P13, DOI 10.1016/j.jclepro.2014.01.065  
 Nordhaus William D., 1996, EC NEW GOODS, P27  
 Perlaviciute G, 2015, RENEW ENERG, V77, P259, DOI 10.1016/j.renene.2014.12.020  
 Reveiu A, 2015, PROCEDIA COMPUT SCI, V52, P812, DOI [10.1016/j.procs.2015.05.137,  
 10.1016/j.procs.2015.05.137]  
 Ringel M, 2003, RENEW SUST ENERG REV, V7, P485, DOI 10.1016/S1364-0321(03)00069-8  
 Rogers EM, 1995, DIFFUSION INNOVATION  
 Sterman J. D., 2000, BUSINESS DYNAMICS SY, P928  
 Vigants E., 2015, J CLEAN PROD, P1  
 Wall R, 2009, ENERG POLICY, V37, P1021, DOI 10.1016/j.enpol.2008.10.045

NR 26

TC 0

Z9 0

U1 16

U2 16

PU ELSEVIER SCI LTD

PI OXFORD

PA THE BOULEVARD, LANGFORD LANE, KIDLINGTON, OXFORD OX5 1GB, OXON, ENGLAND

SN 0301-4215

EI 1873-6777

J9 ENERG POLICY

JI Energy Policy

PD OCT

PY 2017

VL 109

BP 545

EP 554

DI 10.1016/j.enpol.2017.07.030

PG 10

WC Economics; Energy &amp; Fuels; Environmental Sciences; Environmental Studies

SC Business &amp; Economics; Energy &amp; Fuels; Environmental Sciences &amp; Ecology

GA FI5OT

UT WOS:000412034400053

DA 2018-05-03

ER

PT J

AU Al-Hinti, I

Al-Sallami, H

AF Al-Hinti, I.

Al-Sallami, H.

TI Potentials and Barriers of Energy Saving in Jordan's Residential Sector  
 through Thermal Insulation

SO JORDAN JOURNAL OF MECHANICAL AND INDUSTRIAL ENGINEERING

LA English

DT Article

DE Thermal insulation; building codes; residential buildings; energy saving

ID CONSUMPTION; IMPACT

AB The residential sector in Jordan accounts for 21% of final energy consumption and 43% of total electricity consumption. More than 60 % of energy consumed in households is used for space heating and cooling. Thermal insulation of building is a decisive factor in reducing residential heating and cooling energy needs. Although thermal insulation codes have been adopted since the early eighties, enforcement of these codes has been limited. This resulted in sporadic implementation of thermal insulation in residential buildings that varies according to the ownership type, income and education levels. This paper presents an analysis of potential energy savings that can be achieved through retrofitting Jordanian households to comply with the existing thermal insulation codes. In addition, the legal, social, economic, and technical barriers of the use of thermal insulation are discussed in an attempt to bring a better understanding of how the projected savings can be assured. (C) 2017 Jordan Journal of Mechanical and Industrial Engineering. All rights reserved

C1 [Al-Hinti, I.; Al-Sallami, H.] German Jordanian Univ, Sch Appl Tech Sci, Mech & Maintenance Engr Dept, Madaba, Jordan.

RP Al-Hinti, I (reprint author), German Jordanian Univ, Sch Appl Tech Sci, Mech & Maintenance Engr Dept, Madaba, Jordan.

CR Akash BA, 1999, ENERGY, V24, P823, DOI 10.1016/S0360-5442(99)00028-6

Al-Ghandoor A, 2009, RENEW SUST ENERG REV, V13, P1262, DOI 10.1016/j.rser.2008.09.008

Al Momani H., 2008, JORDAN J CIVIL ENG, V2

Al-Sallami H., 2015, THESIS

Alzyood M., 2010, INT REN EN C TUN

Jaber JO, 2008, RENEW SUST ENERG REV, V12, P278, DOI 10.1016/j.rser.2006.05.004

Jaber JO, 2003, ENERG POLICY, V31, P887, DOI 10.1016/S0301-4215(02)00132-5

Jordan National Building Council, 2010, EN SAV BUILD COD

Jordan National Building Council, 2008, THERM INS COD

Ministry of Energy and Mineral Resources (MEMR), 2016, EN 2015 FACTS FIG

Ministry of Energy and Mineral Resources (MEMR), 2016, ANN REP 2015

Mohsen MS, 2001, ENERG CONVERS MANAGE, V42, P1307, DOI 10.1016/S0196-8904(00)00140-0

Chvatal KMS, 2009, J BUILD PERFORM SIMU, V2, P267, DOI 10.1080/19401490903095865

Suliman S., 2011, INT J THERMAL ENV EN, V3, P101

Tommerup H, 2006, ENERG BUILDINGS, V38, P618, DOI 10.1016/j.enbuild.2005.08.017

Yang Y., 2008, PLEA 2008 25 C PASS

Zarei M., 2013, INT J ARCHITECTURE U, V3, P35

NR 17

TC 0

Z9 0

U1 0

U2 0

PU HASHEMITE UNIV

PI ZARKA

PA DEANSHIP ACAD RES & GRADUATE STUD, PO BOX 330127, ZARKA, PC 13133,

JORDAN

SN 1995-6665

J9 JORDAN J MECH IND EN

JI Jordan J. Mech. Ind. Eng.

PD SEP

PY 2017

VL 11

IS 3

BP 141

EP 145

PG 5

WC Engineering, Mechanical

SC Engineering

GA GB0KC

UT WOS:000428733700001

DA 2018-05-03

ER



PT J

AU Radpour, S

Mondal, MAH

Kumar, A

AF Radpour, Saeidreza

Mondal, Md Alam Hossain

Kumar, Amit

TI Market penetration modeling of high energy efficiency appliances in the residential sector

SO ENERGY

LA English

DT Article

DE Market penetration; Market share; Residential appliances; Energy efficiency; Incentives

ID TRANSPORTATION SECTOR; END-USE; STANDARDS; FUEL; TECHNOLOGIES; PERFORMANCE; PROGRAM

AB The aim of this research is to model the market penetration of energy efficient appliances in the residential sector. The analysis focuses on six major appliances refrigerators, freezers, clothes washers, clothes dryers, and ranges to forecast their market penetration and market share during the years 2012 - 2050. Models were developed for each category using 22 years of historical data related to population, household income, immigration, and appliance price. These variables were selected based on the statistical tests of twelve macroeconomic variables. The market shares of high efficiency appliances were analyzed based on the related capital costs, operating costs, lifetime, and incentive. The results show that in Alberta the market penetration growth rate of dishwashers is higher than that of all other appliances, with a projected 30.52% increase between 2012 and 2050. The modeling results also indicate that the average annual energy consumption by refrigerators will decrease from 560.9 kWh in 2012 to 460.8 kWh in 2050, and this decrease indicates an annual energy efficiency improvement of 0.47%. In addition, the effect of an incentive on adopting high energy efficiency appliances and ultimately on energy efficiency improvement in Alberta is more effective for dishwashers and clothes washers. (C) 2017 Elsevier Ltd. All rights reserved.

C1 [Radpour, Saeidreza; Mondal, Md Alam Hossain; Kumar, Amit] Univ Alberta, Donadeo Innovat Ctr Engn 10 263, Dept Mech Engr, Edmonton, AB T6G 1H9, Canada.

[Mondal, Md Alam Hossain] Int Food Policy Res Inst, 2033 K St, Washington, DC 20006 USA.

RP Kumar, A (reprint author), Univ Alberta, Donadeo Innovat Ctr Engn 10 263, Dept Mech Engr, Edmonton, AB T6G 1H9, Canada.

EM Amit.Kumar@ualberta.ca

FU NSERC/Cenovus/Alberta Innovates Associate Industrial Research Chair

Program in Energy and Environmental Systems Engineering [IRCPJ 436795 436794 - 2011]; University of Alberta

FX The authors of this paper are thankful to the NSERC/Cenovus/Alberta Innovates Associate Industrial Research Chair Program in Energy and Environmental Systems Engineering (Grant No. IRCPJ 436795 & 436794 - 2011) and the Cenovus Energy Endowed Chair Program in Environmental Engineering at the University of Alberta for financial support of this research. The authors thank Astrid Blodgett for editorial assistance.

CR AEEA, 2014, JUR REV FUND EN EFF

Atabani AE, 2011, RENEW SUST ENERG REV, V15, P4586, DOI 10.1016/j.rser.2011.07.092

Bansal P, 2011, APPL THERM ENG, V31, P3748, DOI 10.1016/j.applthermaleng.2011.07.023

Chatterjee S, 2013, HDB REGRESSION ANAL

Chun YH, 2005, EUR J OPER RES, V166, P576, DOI 10.1016/j.ejor.2003.12.024

Desroches LB, 2013, ENERG POLICY, V52, P402, DOI 10.1016/j.enpol.2012.09.066

de la Rue du Can S, 2014, ENERG POLICY, V72, P56

EnergyStar, 2014, IS THER ENERGY STAR

Eviews, 2013, EIEWS ILL VERS 8

Gessinger GH, 2009, MATERIALS AND INNOVATIVE PRODUCT DEVELOPMENT: USING COMMON SENSE, P181

Haberman SJ., 1978, INTRO TOPICS, P292

Hu Z, 2013, ENERG ECON, V39, P313, DOI 10.1016/j.eneco.2013.03.007

Jin H, 2010, J ECONOMETRICS, V157, P205, DOI 10.1016/j.jeconom.2009.12.002

Jollands N, 2010, ENER POLICY, V38, P6409, DOI 10.1016/j.enpol.2009.11.090  
KUMAR V, 1994, INT J FORECASTING, V10, P295, DOI 10.1016/0169-2070(94)90009-4  
Lund PD, 2010, ENERGY, V35, P647, DOI 10.1016/j.energy.2009.10.037  
McNeil MA, 2010, ENER BUILDINGS, V42, P783, DOI 10.1016/j.enbuild.2009.11.015  
McWhinney M, 2005, ENER POLICY, V33, P1613, DOI 10.1016/j.enpol.2004.02.001  
Meng M, 2015, ENERGY, V89, P283, DOI 10.1016/j.energy.2015.05.132  
Miller P, 2014, SUSTAIN ENERGY TECHN, V6, P105, DOI 10.1016/j.seta.2014.01.008  
Noori M, 2016, ENERGY, V96, P215, DOI 10.1016/j.energy.2015.12.018  
NRCAN, 2014, COMPR EN US DAT TABL  
NRCAN, 2014, EN STAR CAN  
NRCAN, 2014, INTR REG  
Packey DJ, 1993, MARKET PENETRATION N  
Pavelescu FM, 2014, PROC ECON FINANC, V8, P535, DOI 10.1016/S2212-5671(14)00125-7  
Pinto H, 2011, J SOCIO-ECON, V40, P436, DOI 10.1016/j.socec.2011.04.011  
Rao KU, 2010, RENEW SUST ENER REV, V14, P1070, DOI 10.1016/j.rser.2009.11.007  
SIMPSON MJA, 1986, ANIM BEHAV, V34, P604, DOI 10.1016/S0003-3472(86)80130-0  
Sorensen B., 2004, RENEW ENER, P523  
StatCan, 2014, POP YEAR PROV TERR  
StatCan, 2011, EN STAR APPL US PROV  
StatCan, 2014, UN RAT CAN PROV HLTH  
StatCan, 2014, INT MIGR AG GROUP SE  
Subramanyam V, 2015, ENER CONVERS MANAGE, V91, P342, DOI 10.1016/j.enconman.2014.12.024  
Tonn B, 2013, ENER POLICY, V56, P371, DOI 10.1016/j.enpol.2012.12.076  
Turiel I, 1997, ENER BUILDINGS, V26, P5, DOI 10.1016/S0378-7788(96)01011-0  
Westbrook J, 2014, ENER POLICY, V65, P419, DOI 10.1016/j.enpol.2013.10.030  
Wilkerson JT, 2013, ENER ECON, V40, P773, DOI 10.1016/j.eneco.2013.09.023  
Zhang XL, 2012, ENER POLICY, V41, P241, DOI 10.1016/j.enpol.2011.10.043

NR 40  
TC 0  
Z9 0  
U1 5  
U2 5  
PU PERGAMON-ELSEVIER SCIENCE LTD  
PI OXFORD  
PA THE BOULEVARD, LANGFORD LANE, KIDLINGTON, OXFORD OX5 1GB, ENGLAND  
SN 0360-5442  
EI 1873-6785  
J9 ENERGY  
JI Energy  
PD SEP 1  
PY 2017  
VL 134  
BP 951  
EP 961  
DI 10.1016/j.energy.2017.06.039  
PG 11  
WC Thermodynamics; Energy & Fuels  
SC Thermodynamics; Energy & Fuels  
GA FE5YV  
UT WOS:000408288100080  
DA 2018-05-03  
ER

PT J  
AU Schoch, T  
AF Schoch, Torsten  
TI Energy-efficient Masonry Buildings with AAC  
SO CEMENT WAPNO BETON

LA English

DT Article; Proceedings Paper

CT 5th Conference of the Concrete-Producers-Association (SPB)

CY OCT 10-11, 2017

CL Serock, POLAND

SP Concrete Producers Assoc

ID HOUSE; PLUS

AB The building of houses with low energy consumption or even a negative energy balance with the massive building construction methods commonly used in Europe has been a usual and acknowledged practice for some decades. Massive building construction was a driving factor that could not be ignored in the first attempts toward low-energy houses. Monolithic external walls, which undertake the tasks both of bearing the loads and of resisting fire, and keeping noise and vapour out of the interior rooms, were particularly challenged, since they were to do without outside "assistance" in the form of insulation layers. This challenge seems greater than ever with the path to zero-energy buildings in Europe. It has been demonstrated on many "beacon" projects that even extreme requirements do not have to mean the end of monolithic construction and certainly not of massive construction, given the right building services technology. The presented building projects are only a few, more are being added daily. Nonetheless, a critical note about the developing principle seems justified. Independent of the demand to always keep an eye on the economic benefit of a measure, some developments seem suitable to change the monolithic approach in European building to a background to be fulfilled alone with insulation to facades or in constructions. The projects presented in this article should also deliver sufficient arguments to permit the existing range of technology to still act in an unrestrained manner instead of restricting it.

C1 [Schoch, Torsten] Xella Technol & Forsch Gesell mbH Kloster Lehnin, Kloster Lehnin, Germany.

[Schoch, Torsten] EAACA, Tech Comm, Berlin, Germany.

[Schoch, Torsten] Presidium DIN, Nazi, Germany.

RP Schoch, T (reprint author), Xella Technol & Forsch Gesell mbH Kloster Lehnin, Kloster Lehnin, Germany.;

Schoch, T (reprint author), EAACA, Tech Comm, Berlin, Germany.;

Schoch, T (reprint author), Presidium

DIN, Nazi, Germany.

CR Hegner H.D., 2013, ZUKUNFTSSICHER BAUEN

Institut für Wohnen und Umwelt GmbH, 1996, GESCH NIEDR PASS

Schoch T, 2013, MAUERWERK, V17, P64, DOI 10.1002/dama.201300569

Schoch T, 2014, MAUERWERK, V18, P118, DOI 10.1002/dama.201400628

Wege zum Effizienzhaus Plus Bundesministerium für Umwelt Naturschutz, 2014, NAT BAU REAKT

BMUB 1

NR 5

TC 0

Z9 0

U1 1

U2 1

PU STOWARZYSZENIE PRODUCENTOW CEMENTU

PI KRAKOW

PA UL LUBELSKA 29 LOK 4-5, KRAKOW, 30-003, POLAND

SN 1425-8129

J9 CEM WAPNO BETON

JI Cem. Wapno Beton

PD SEP-OCT

PY 2017

VL 22

IS 5

BP 381

EP 398

PG 18

WC Construction & Building Technology; Materials Science, Composites

SC Construction & Building Technology; Materials Science

GA FM7SB

UT WOS:000415279800004

DA 2018-05-03

ER

PT J

AU Silenzi, F

Priarone, A

Fossa, M

AF Silenzi, Federico

Priarone, Antonia

Fossa, Marco

TI Energy demand modeling and forecast of Monoblocco Building at the city

hospital of Genova according to different retrofit scenarios

SO INTERNATIONAL JOURNAL OF HEAT AND TECHNOLOGY

LA English

DT Article

DE Energy Saving; Buildings; Retrofitting; Energy Plus; Dynamic Simulations

AB Buildings are one of the major energy consumers. Thus, it is crucial to develop new solutions in order to retrofit existent buildings especially for public buildings), achieving both energy saving and environmental protection. The proposed solutions are in many cases expensive and it is necessary to evaluate them case by case. The present analysis focuses on the development of a methodology useful to select and evaluate different energy retrofitting solutions and it is applied to energy simulations of the Monoblocco Pavilion at the San Martino Hospital in Genova, Italy. The model allows to evaluate the building heating and cooling loads and to predict the energy requests associated to different retrofit scenarios. The selected retrofit technologies include some innovative solutions such as facade super insulated void panel, smart rotating windows with different emissivity glass and sunlight carrying optic-fiber coupled with dimmed LED lighting system. Results have been analyzed in terms of hourly values of selected variables and the different effects related to the retrofit strategies have been compared in terms of energy saving. The comparison included also the Simple Pay Back Period (SPB) of the investment in order to identify the best technologies combination also from an economic point of view.

C1 [Silenzi, Federico; Priarone, Antonia; Fossa, Marco] Univ Genoa, DIME Dept Mech Energy Management & Transportat En, Via Opera Pia 15a, I-116145 Genoa, Italy.

RP Silenzi, F (reprint author), Univ Genoa, DIME Dept Mech Energy Management & Transportat En, Via Opera Pia 15a, I-116145 Genoa, Italy.

EM federico.silenzi@edu.unige.it

CR Aksoezen M, 2015, ENERGBUILDINGS, V87, P74, DOI 10.1016/j.enbuild.2014.10.074

Boyano A, 2013, ENERGBUILDINGS, V65, P19, DOI 10.1016/j.enbuild.2013.05.039

Eneritz B., 2013, INTEGRATION TECHNOLOGY, P11

Griego D, 2015, SUSTAIN CITIES SOC, V17, P132, DOI 10.1016/j.scs.2015.04.008

Penna P, 2015, ENERGBUILDINGS, V95, P57, DOI 10.1016/j.enbuild.2014.11.003

Spyropoulos GN, 2011, ENERGBUILDINGS, V43, P770, DOI 10.1016/j.enbuild.2010.12.015

U.S. Department of Energy, 2013, BUILD EN DAT BOOK

Vollaro RD, 2015, ENERGBUILDINGS, V87, P87, DOI 10.1016/j.enbuild.2014.10.080

Wu Z, 2015, ENERGBUILDINGS, V87, P45, DOI 10.1016/j.enbuild.2014.10.079

NR 9

TC 0

Z9 0

U1 0

U2 0

PU EDIZIONI ETS

PI PISA

PA PIAZZA CARRARA 16-19, 56126 PISA, ITALY

SN 0392-8764

J9 INT J HEAT TECHNOL

JI Int. J. Heat Technol.

PD SEP

PY 2017

VL 35

SI 1

BP S33

EP S40

DI 10.18280/ijht.35Sp0105  
 PG 8  
 WC Thermodynamics  
 SC Thermodynamics  
 GA FP00B  
 UT WOS:000417300500005  
 OA gold  
 DA 2018-05-03  
 ER

PT J  
 AU Lu, ML  
 Wang, ZH  
 AF Lu, Milin  
 Wang, Zhaohua

TI Rebound effects for residential electricity use in urban China: an aggregation analysis based E-I-O and scenario simulation

SO ANNALS OF OPERATIONS RESEARCH

LA English

DT Article

DE Direct rebound; Indirect rebound; Energy efficiency; Input-output model; China

ID ENERGY EFFICIENCY; EMPIRICAL-EVIDENCE; CONSUMPTION; HOUSEHOLDS; EMISSIONS; TRANSPORT; FALLACIES; BACKFIRE; POLICY; UK

AB Technological progress is considered an important means of decreasing energy consumption. However, rebound effects caused by energy efficiency improvements directly affect the realization of energy savings and emission reduction. This paper focuses on the main theory and methodology of direct and indirect rebound effects. Using 30 sets of provincial panel data and national input-output data for China from 2007, this paper builds a co-integrating equation, a panel error correction model, and an 8-sector energy-input-output model. We subsequently estimate the direct and indirect rebound effects of urban residential electricity use. The results indicate that in the long term the direct plus indirect partial rebound effect is 0.79; in the short term it is 0.78. Thus, the majority of the expected electricity reduction in Chinese urban residential energy consumption arising from efficiency improvement may be offset. These rebound effects impair the functioning of energy efficiency policies. Therefore, the Chinese government should not improve energy efficiency alone—they must also take into consideration the relevant energy-pricing reforms when formulating energy policies.

C1 [Lu, Milin; Wang, Zhaohua] Beijing Inst Technol, Sch Management & Econ, Beijing 100081, Peoples R China.

[Lu, Milin] Beijing Inst Petrochem Technol, Sch Econ & Management, Beijing 102617, Peoples R China.

[Wang, Zhaohua] Beijing Inst Technol, Ctr Energy & Environm Policy Res, Beijing 100081, Peoples R China.

[Wang, Zhaohua] Collaborat Innovat Ctr Elect Vehicles Beijing, Beijing 100081, Peoples R China.

RP Wang, ZH (reprint author), Beijing Inst Technol, Sch Management & Econ, Beijing 100081, Peoples R China.; Wang, ZH (reprint author), Beijing Inst Technol, Ctr Energy & Environm Policy Res, Beijing 100081, Peoples R China.; Wang, ZH (reprint author), Collaborat Innovat Ctr Elect Vehicles Beijing, Beijing 100081, Peoples R China.

EM lumilin@163.com; wangzh1018@hotmail.com

FU National Nature Science Foundation of China [71173017, 71573016, 71521002]; State Key Development Program of Basic Research of China [2012CB95570003]

FX This study is supported by the National Nature Science Foundation of China (Reference Nos. 71173017, 71573016, 71521002) and State Key Development Program of Basic Research of China (Reference No. 2012CB95570003). The authors also want to thank Prof. Yiming Wei for his comment and suggestion.

CR Murata Akinobu, 2008, APPL ENERG, V85, P1113  
 Alfredsson EC, 2004, ENERGY, V29, P513, DOI 10.1016/j.energy.2003.10.013  
 Bentzen J, 2004, ENERG ECON, V26, P123, DOI 10.1016/S0140-9883(03)00047-1

- Berkhout PHG, 2000, ENERG POLICY, V28, P425, DOI 10.1016/S0301-4215(00)00022-7
- Binswanger M, 2001, ECOL ECON, V36, P119, DOI 10.1016/S0921-8009(00)00214-7
- Brandt L, 2006, ECON DEV CULT CHANGE, V55, P43, DOI 10.1086/505722
- Brannlund R, 2007, ENERG ECON, V29, P1, DOI 10.1016/j.eneco.2005.09.003
- BROOKES L, 1990, ENERG POLICY, V18, P199, DOI 10.1016/0301-4215(90)90145-T
- BROOKES LG, 1978, ENERG POLICY, V6, P94, DOI 10.1016/0301-4215(78)90031-9
- DARGAY J, 1995, ENERG ECON, V17, P59, DOI 10.1016/0140-9883(95)98907-L
- Druckman A, 2011, ENERG POLICY, V39, P3572, DOI 10.1016/j.enpol.2011.03.058
- Freire-Gonzalez J, 2011, ECOL MODEL, V223, P32, DOI 10.1016/j.ecolmodel.2011.09.001
- Freire-Gonzalez J. F., 2010, ENERG POLICY, V38, P2309
- Frondel M., 2008, ENERGY J, V29, P154, DOI DOI 10.5547/ISSN0195-6574-EJ-V0129-N04-7
- GATELY D, 1993, ENERGY J, V14, P163
- Greening LA, 2000, ENERG POLICY, V28, P389
- GRUBB MJ, 1990, ENERG POLICY, V18, P783, DOI 10.1016/0301-4215(90)90031-X
- Haas R, 2000, ENERG POLICY, V28, P403, DOI 10.1016/S0301-4215(00)00023-9
- Hymel KM, 2010, TRANSPORT RES B-METH, V44, P1220, DOI 10.1016/j.trb.2010.02.007
- Jevons W.S., 1865, COAL QUESTION INQUIR
- Jin SH, 2007, ENERG POLICY, V35, P5622, DOI 10.1016/j.enpol.2007.05.028
- Khazzoom J. D, 1980, ENERGY J, V1, P21
- Kok R, 2006, ENERG POLICY, V34, P2744, DOI 10.1016/j.enpol.2005.04.006
- LEONTIEF W, 1970, REV ECON STAT, V52, P262, DOI 10.2307/1926294
- Liao H, 2013, APPL ENERG, V104, P457, DOI 10.1016/j.apenergy.2012.11.036
- Liao H, 2012, RENEW SUST ENERG REV, V16, P4537, DOI 10.1016/j.rser.2012.04.018
- Lin BQ, 2013, ENERGY, V59, P240, DOI 10.1016/j.energy.2013.07.021
- Mizobuchi K, 2008, ENERG ECON, V30, P2486, DOI 10.1016/j.eneco.2008.01.001
- Ouyang JL, 2010, ENERGY, V35, P5269, DOI 10.1016/j.energy.2010.07.038
- Roy J, 2000, ENERG POLICY, V28, P433, DOI 10.1016/S0301-4215(00)00027-6
- Saunders HD, 2008, ENERG ECON, V30, P2184, DOI 10.1016/j.eneco.2007.11.006
- Saunders HD, 2000, ENERG POLICY, V28, P497, DOI 10.1016/S0301-4215(00)00025-2
- Saunders HD, 2000, ENERG POLICY, V28, P439, DOI 10.1016/S0301-4215(00)00024-0
- Saunders H. D., 1992, ENERGY J, V13, P131, DOI DOI 10.5547/ISSN0195-6574-EJ-V0113-N04-7
- Shao S, 2013, EC RES J, V2, P96
- Shao S, 2014, ENERG POLICY, V72, P235, DOI 10.1016/j.enpol.2014.04.041
- Small KA, 2007, ENERG J, V28, P25
- Sorrell S, 2008, ECOL ECON, V65, P636, DOI 10.1016/j.ecolecon.2007.08.013
- Thomas BA, 2013, ECOL ECON, V86, P199, DOI 10.1016/j.ecolecon.2012.12.003
- Thomas BA, 2013, ECOL ECON, V86, P188, DOI 10.1016/j.ecolecon.2012.12.002
- Wang K, 2013, MATH COMPUT MODEL, V58, P1117, DOI 10.1016/j.mcm.2011.11.067
- Wang K, 2013, APPL ENERG, V104, P105, DOI 10.1016/j.apenergy.2012.11.039
- Wang Z. H., 2012, J RENEWABLE SUSTAINA, V4, P45
- Wang ZH, 2014, APPL ENERG, V133, P274, DOI 10.1016/j.apenergy.2014.07.090
- Wang ZH, 2014, RENEW SUST ENERG REV, V30, P124, DOI 10.1016/j.rser.2013.09.002
- Wang ZH, 2011, ENERG POLICY, V39, P3550, DOI 10.1016/j.enpol.2011.03.055

NR 46

TC 0

Z9 0

U1 7

U2 15

PU SPRINGER

PI DORDRECHT

PA VAN GODEWIJKSTRAAT 30, 3311 GZ DORDRECHT, NETHERLANDS

SN 0254-5330

EI 1572-9338

J9 ANN OPER RES

JI Ann. Oper. Res.

PD AUG

PY 2017

VL 255

IS 1-2  
 BP 525  
 EP 546  
 DI 10.1007/s10479-016-2153-0  
 PG 22  
 WC Operations Research & Management Science  
 SC Operations Research & Management Science  
 GA FB8PO  
 UT WOS:000406401200025  
 DA 2018-05-03  
 ER

PT J  
 AU Marin, G  
     Palma, A  
 AF Marin, Giovanni  
     Palma, Alessandro  
 TI Technology invention and adoption in residential energy consumption A  
     stochastic frontier approach

SO ENERGY ECONOMICS

LA English

DT Article

DE Energy efficiency; Energy policies; Technological adoption; Electrical  
 appliances; Stochastic frontier analysis; Residential sector

ID ELECTRICITY CONSUMPTION; TECHNICAL INEFFICIENCY; HOME APPLIANCES;  
 PANEL-DATA; POLICY INSTRUMENTS; HEALTH EXPENDITURE; INDUCED INNOVATION;  
 CARE EXPENDITURE; ECO-INNOVATION; EFFICIENCY GAP

AB In this paper we analyse the electricity consumption of a set of four traditional 'white goods' in a panel of ten EU countries observed over the period 1995-2013 with the aim of disentangling the amount of technical efficiency from overall energy saving using a stochastic frontier approach. The efficiency trend is modelled as a function of energy efficiency policies and innovation dynamics that combines invention and adoption processes using specific patents weighted by granular production data and worldwide bilateral import flows. Our model also accounts for potential endogeneity arising when innovation processes and economic growth are considered. With this replicable approach, the stochastic frontier framework allows for explicit modelling of innovation processes. Our results show that the efficiency component is related to changes in the energy efficient technological content of appliances. The 'international' component represents a predominant share of technological advancement and exerts a significant influence on the transient efficiency. Our evidence calls for an active role to be played by policy makers in focusing on innovation and trade policies in order to achieve more ambitious energy efficiency targets. (C) 2017 Elsevier B.V. All rights reserved.

C1 [Marin, Giovanni] Univ Urbino Carlo Bo, Dept Econ Soc & Polit, Urbino, Italy.

[Marin, Giovanni; Palma, Alessandro] SEEDS Sustainabil Environm Econ & Dynam Studies, Ferrara, Italy.

[Palma, Alessandro] Bocconi Univ, IEFE, Roentgen G 1, I-20136 Milan, Italy.

[Palma, Alessandro] Univ Roma Tor Vergata, Fac Econ, CEIS, Via Columbia 2, I-00133 Rome, Italy.

RP Palma, A (reprint author), Bocconi Univ, IEFE, Roentgen G 1, I-20136 Milan, Italy.

EM giovanni.marin@uniurb.it; alessandro.palma@unibocconi.it

FU Italian Ministry of Education, University [2010S2LHSE]

FX We are indebted to two anonymous referees for their insightful comments which have helped to substantively enrich the initial version of the paper. We also thank Giuseppe Ilardi (Bank of Italy) and participants in the first IAERE conference held in 2014 at the Department of Economics at Ferrara University. Financial support from the Italian Ministry of Education, University and Research (Scientific Research Program of National Relevance 2010 on "Climate change in the Mediterranean area: scenarios, economic impacts, mitigation policies and technological innovation", Grant No. 2010S2LHSE) is gratefully acknowledged. The usual disclaimer applies.

- CR Aigner D., 1977, J ECONOMETRICS, V6, P21, DOI [DOI 10.1016/0304-4076(77)90052-5, 10.1016/0304-4076(77)90052-5]
- Alberini A, 2011, ENERG ECON, V33, P889, DOI 10.1016/j.eneco.2011.03.009
- ANG BW, 1995, ENERG ECON, V17, P39, DOI 10.1016/0140-9883(95)98905-J
- Baltagi BH, 2010, ECON MODEL, V27, P804, DOI 10.1016/j.econmod.2009.12.001
- Barbieri N, 2017, ENERG EFFIC, V10, P693, DOI 10.1007/s12053-016-9470-7
- Battese G. E., 1995, EMPIR ECON, V20, P325, DOI DOI 10.1007/BF01205442
- Battese G. E., 1992, J PROD ANAL, V3, P153, DOI DOI 10.1007/BF00158774
- Belotti F., 2015, EC WORKING IN PRESS
- Belotti F., 2012, 231 CEIS
- Belotti F, 2013, STATA J, V13, P719
- Bertoldi P., 2016, SCI REPORTS JOINT RE
- Bigano A., 2010, 642010 FEEM
- Boyd GA, 2008, ENERJ, V29, P23
- Brown M., 2004, ENCY ENERGY, V4, P465
- Buck J, 2007, ENERGY, V32, P1769, DOI 10.1016/j.energy.2006.11.008
- Burwell C.C., 1990, ELECT AM EC AGENT TE
- Cabeza LF, 2014, RENEW SUST ENER REV, V36, P188, DOI 10.1016/j.rser.2014.04.053
- Chakravarty D, 2013, CURR OPIN ENV SUST, V5, P216, DOI 10.1016/j.cosust.2013.03.001
- Chen YY, 2014, J ECONOMETRICS, V181, P65, DOI 10.1016/j.jeconom.2013.05.009
- Chitnis M, 2015, ENERG ECON, V52, pS100, DOI 10.1016/j.eneco.2015.08.026
- Colombi R, 2014, J PROD ANAL, V42, P123, DOI 10.1007/s11123-014-0386-y
- Costantini V., 2015, EC KNOWLEDGE GENERAT
- Costantini V, 2017, RES POLICY, V46, P799, DOI 10.1016/j.respol.2017.02.004
- Costantini V, 2014, TECHNOL FORECAST SOC, V88, P26, DOI 10.1016/j.techfore.2014.06.014
- Datta S, 2014, J ENVIRON ECON MANAG, V68, P480, DOI 10.1016/j.jeem.2014.09.003
- Davis LW, 2008, RAND J ECON, V39, P530, DOI 10.1111/j.0741-6261.2008.00026.x
- de Miguel C, 2015, ENERG ECON, V52, pS1, DOI 10.1016/j.eneco.2015.11.012
- del Rio P, 2010, J IND ECOL, V14, P541, DOI 10.1111/j.1530-9290.2010.00259.x
- Diaz-Rainey I, 2015, ENERG POLICY, V82, P105, DOI 10.1016/j.enpol.2015.03.003
- European Commission (EC). COM, 2014, COM201415 EC
- European Commission (EC), 2012, EN EFF STAT REP 2012
- Ek K, 2010, ENERG POLICY, V38, P1578, DOI 10.1016/j.enpol.2009.11.041
- ETC-SCP (European Topic Centre on Sustainable Consumption and Production), 2013, 4 ETCSCP
- Eurostat, 2016, SOLD PROD EXP IMP PR
- Eurostat, 2016, EU TRAD STAT 1988 CN
- European Commission, 2011, COM2011109 EUR COMM
- Evenson R.E., 2002, TECHNOLOGICAL CHANGE, V2002, P61
- Fernandez VP, 2001, ENERG ECON, V23, P305, DOI 10.1016/S0140-9883(00)00066-9
- Filippini M, 2004, ENERG POLICY, V32, P429, DOI 10.1016/S0301-4215(02)00314-2
- FILIPPINI M, 1995, RESOUR ENERGY ECON, V17, P281, DOI 10.1016/0928-7655(95)00005-I
- Filippini M, 2016, J PROD ANAL, V45, P187, DOI 10.1007/s11123-015-0446-y
- Filippini M, 2015, ENERG ECON, V52, pS5, DOI 10.1016/j.eneco.2015.08.023
- Filippini M, 2014, ENERG POLICY, V69, P73, DOI 10.1016/j.enpol.2014.01.047
- Filippini M, 2012, ENERG ECON, V34, P1484, DOI 10.1016/j.eneco.2012.06.013
- Fullerton TM, 2012, ENERG ECON, V34, P1693, DOI 10.1016/j.eneco.2012.02.004
- Gans W, 2013, ENERG ECON, V36, P729, DOI 10.1016/j.eneco.2012.11.022
- Geroski PA, 2000, RES POLICY, V29, P603, DOI 10.1016/S0048-7333(99)00092-X
- Gillingham K, 2014, REV ENV ECON POLICY, V8, P18, DOI 10.1093/reep/ret021
- Greene W, 2005, J PROD ANAL, V23, P7, DOI 10.1007/s11123-004-8545-1
- Greene W, 2005, J ECONOMETRICS, V126, P269, DOI 10.1016/j.jeconom.2004.05.003
- Greening LA, 2000, ENERG POLICY, V28, P389
- GRILICHES Z, 1957, ECONOMETRICA, V25, P501, DOI 10.2307/1905380
- Griliches Z., 1998, R D PRODUCTIVITY ECO
- GROSSMAN GM, 1991, EUR ECON REV, V35, P517, DOI 10.1016/0014-2921(91)90153-A
- Halici-Tuluçe NS, 2016, INT J HEALTH ECON MA, V16, P23, DOI 10.1007/s10754-015-9179-8
- Hall BH, 2005, RAND J ECON, V36, P16
- Hall B. H., 2007, 13473 NBER



- HARTMAN RS, 1979, ANNU REV ENERGY, V4, P433, DOI 10.1146/annurev.eg.04.110179.002245
- HITIRIS T, 1992, J HEALTH ECON, V11, P173, DOI 10.1016/0167-6296(92)90033-W
- IEA (International Energy Agency), 2013, TRANS SUST BUILD STR
- IEA, 2009, GADG GIG POL EN EFF
- JAFFE AB, 1994, ENER POLICY, V22, P804, DOI 10.1016/0301-4215(94)90138-4
- JAFFE AB, 1995, J ENVIRON ECON MANAG, V29, pS43, DOI 10.1006/jeem.1995.1060
- Jaffe A.B., 2004, ENCY ENERGY
- Johnstone N, 2010, ENVIRON RESOUR ECON, V45, P133, DOI 10.1007/s10640-009-9309-1
- KARSHENAS M, 1993, RAND J ECON, V24, P503, DOI 10.2307/2555742
- Kavousian A, 2013, ENERGY, V55, P184, DOI 10.1016/j.energy.2013.03.086
- Kaza N, 2010, ENER POLICY, V38, P6574, DOI 10.1016/j.enpol.2010.06.028
- Khazzoom J. D, 1980, ENERGY J, V1, P21
- Kleiman E., 1974, EC HLTH MED CARE
- Kumar S, 2002, AM ECON REV, V92, P527, DOI 10.1257/00028280260136381
- Kumbhakar S., 2000, STOCHASTIC FRONTIER
- KUMBHAKAR SC, 1990, J ECONOMETRICS, V46, P201, DOI 10.1016/0304-4076(90)90055-X
- Lancaster T, 2000, J ECONOMETRICS, V95, P391, DOI 10.1016/S0304-4076(99)00044-5
- Lanjouw JO, 1998, J IND ECON, V46, P405, DOI 10.1111/1467-6451.00081
- Linares P, 2010, J ECON SURV, V24, P573, DOI 10.1111/j.1467-6419.2009.00609.x
- Malerba F., 1996, IND CORP CHANGE, V5, P51, DOI DOI 10.1093/ICC/5.1.51
- McKinsey, 2012, MCKINSEY SUSTAINABIL
- McKinsey, 2009, PATHWAYS LOW CARBON
- MEEUSEN W, 1977, INT ECON REV, V18, P435, DOI 10.2307/2525757
- Mills B, 2010, ENER POLICY, V38, P814, DOI 10.1016/j.enpol.2009.10.028
- Murillo-Zamorano LR, 2004, J ECON SURV, V18, P33, DOI 10.1111/j.1467-6419.2004.00215.x
- Narayan PK, 2007, ENER POLICY, V35, P4485, DOI 10.1016/j.enpol.2007.03.018
- Nesta L, 2014, J ENVIRON ECON MANAG, V67, P396, DOI 10.1016/j.jeem.2014.01.001
- Newell RG, 1999, Q J ECON, V114, P941, DOI 10.1162/003355399556188
- NEWHOUSE JP, 1977, J HUM RESOUR, V12, P115, DOI 10.2307/1914288
- Neyman J, 1948, ECONOMETRICA, V16, P1, DOI 10.2307/1914288
- Noailly J, 2012, ENER ECON, V34, P795, DOI 10.1016/j.eneco.2011.07.015
- OECD, 2003, ENV SUST BUILD CHALL
- Orea L, 2015, ENER ECON, V49, P599, DOI 10.1016/j.eneco.2015.03.016
- Perla J., 2015, 20881 NBER
- PITT MM, 1981, J DEV ECON, V9, P43, DOI 10.1016/0304-3878(81)90004-3
- Popp D, 2006, J ENVIRON ECON MANAG, V51, P46, DOI 10.1016/j.jeem.2005.04.006
- Popp D, 2003, J POLICY ANAL MANAG, V22, P641, DOI 10.1002/pam.10159
- Popp D, 2002, AM ECON REV, V92, P160, DOI 10.1257/000282802760015658
- Ramos A, 2015, ENER ECON, V52, pS17, DOI 10.1016/j.eneco.2015.08.022
- Saunders HD, 2013, TECHNOL FORECAST SOC, V80, P1317, DOI 10.1016/j.techfore.2012.12.007
- Schleich J, 2013, ENER POLICY, V61, P1097, DOI 10.1016/j.enpol.2013.05.012
- Schmidt P., 1984, J BUS ECON STAT, V2, P367, DOI DOI 10.2307/1391278
- Shih HY, 2009, TECHNOL FORECAST SOC, V76, P821, DOI 10.1016/j.techfore.2008.09.001
- Sokoloff KL, 2004, J ECON LIT, V42, P1158
- Sorrell S, 2008, ECOL ECON, V65, P636, DOI 10.1016/j.ecolecon.2007.08.013
- Sovacool BK, 2009, ENER POLICY, V37, P1529, DOI 10.1016/j.enpol.2008.12.016
- Stern DI, 2012, ENER ECON, V34, P2200, DOI 10.1016/j.eneco.2012.03.009
- Stoneman P., 2001, EC TECHNOLOGICAL DIF
- Stoneman P., 1983, EC ANAL TECHNOLOGICA
- Terza JV, 2008, J HEALTH ECON, V27, P531, DOI 10.1016/j.jhealeco.2007.09.009
- Thomas S., 2015, ENERGY EFFICIENCY PO
- THORE S, 1994, J PROD ANAL, V5, P229, DOI 10.1007/BF01073909
- Tsionas EG, 2014, J APPL ECONOMET, V29, P110, DOI 10.1002/jae.2300
- van den Bergh JCM, 2011, ENVIRON RESOUR ECON, V48, P43, DOI 10.1007/s10640-010-9396-z
- Verdolini E, 2011, J ENVIRON ECON MANAG, V61, P119, DOI 10.1016/j.jeem.2010.08.004
- Wieczorek AJ, 2012, SCI PUBL POLICY, V39, P74, DOI 10.1093/scipol/scr008

Z9 0  
 U1 5  
 U2 5  
 PU ELSEVIER SCIENCE BV  
 PI AMSTERDAM  
 PA PO BOX 211, 1000 AE AMSTERDAM, NETHERLANDS  
 SN 0140-9883  
 EI 1873-6181  
 J9 ENERG ECON  
 JI Energy Econ.  
 PD AUG  
 PY 2017  
 VL 66  
 BP 85  
 EP 98  
 DI 10.1016/j.eneco.2017.06.005  
 PG 14  
 WC Economics  
 SC Business & Economics  
 GA FI500  
 UT WOS:000412033900009  
 DA 2018-05-03  
 ER

PT J

AU Schleich, J

Faure, C

Klobasa, M

AF Schleich, Joachim

Faure, Corinne

Klobasa, Marian

TI Persistence of the effects of providing feedback alongside smart  
 metering devices on household electricity demand

SO ENERGY POLICY

LA English

DT Article

DE Smart metering; Feedback; Persistence; Household electricity consumption

ID ENERGY-CONSERVATION; CONSUMPTION; INFORMATION; SAVINGS

AB Using large-sample high temporal resolution data from a smart metering field trial, we econometrically estimate the effects of providing feedback in addition to smart metering devices. We compare consumption levels and patterns between a pilot group that received feedback in addition to smart metering devices and a control group with only smart metering devices. We investigate, in particular, the persistence of the effects and whether the effects differ between periods of high and low household occupancy, i.e. between morning and evening periods, and between weekdays and weekend days. The findings show that feedback is effective, leading to about 5% electricity consumption reduction that is persistent over an eleven month period. Furthermore, our results show that this reduction affects both low and high occupancy periods, suggesting that feedback is associated with rather permanent changes in habitual behavior and/or investments in energy-efficient technologies.

C1 [Schleich, Joachim; Faure, Corinne] Grenoble Ecole Management, 12 Rue Pierre Semard, F-38000 Grenoble, France.

[Schleich, Joachim; Klobasa, Marian] Fraunhofer Inst Syst & Innovat Res, Breslauer Str 48, D-76139 Karlsruhe, Germany.

[Schleich, Joachim] Virginia Polytech Inst & State Univ, Hutcheson Hall, Blacksburg, VA 24061 USA.

RP Schleich, J (reprint author), Grenoble Ecole Management, 12 Rue Pierre Semard, F-38000 Grenoble, France.; Schleich, J (reprint author), Fraunhofer Inst Syst & Innovat Res, Breslauer Str 48, D-76139 Karlsruhe, Germany.; Schleich, J (reprint author), Virginia Polytech Inst & State Univ, Hutcheson Hall, Blacksburg, VA 24061 USA.

EM joachim.schleich@grenoble-em.com

OI Schleich, Joachim/0000-0001-6079-7240  
 FU German Federal Ministry of Education and Research  
 FX This research was partly funded by the German Federal Ministry of  
 Education and Research in the socio-economic research funding program  
 "From Knowledge to Action New Paths towards Sustainable Consumption".  
 CR Abrahamse W, 2005, J ENVIRON PSYCHOL, V25, P273, DOI 10.1016/j.jenvp.2005.08.002  
 Allcott H, 2011, J PUBLIC ECON, V95, P1082, DOI 10.1016/j.jpubeco.2011.03.003  
 Angrist JD, 2009, MOSTLY HARMLESS ECONOMETRICS: AN EMPIRICISTS COMPANION, P1  
 Buchanan K, 2015, ENER POLICY, V77, P89, DOI 10.1016/j.enpol.2014.12.008  
 Darby S., 2006, REV DEFRA LIT METERI  
 Delmas MA, 2013, ENER POLICY, V61, P729, DOI 10.1016/j.enpol.2013.05.109  
 Ehrhardt-Martinez K., 2010, ADV METERING INITIAT  
 Electric Power Research Institute (EPRI), 2009, RES EL US FEEDB RES  
 European commission, 2016, SMART MET DEPL EUR U  
 Faruqui A, 2010, ENER POLICY, V38, P6222, DOI 10.1016/j.enpol.2010.06.010  
 Gans W, 2013, ENER ECON, V36, P729, DOI 10.1016/j.eneco.2012.11.022  
 Gleerup M, 2010, ENER J, V31, P113  
 Houde S, 2013, ENER J, V34, P87, DOI 10.5547/01956574.34.1.4  
 Iacus SM, 2012, POLIT ANAL, V20, P1, DOI 10.1093/pan/mpr013  
 Iacus SM, 2011, J AM STAT ASSOC, V106, P345, DOI 10.1198/jasa.2011.tm09599  
 Imbens GW, 2004, REV ECON STAT, V86, P4, DOI 10.1162/003465304323023651  
 Matsukawa I, 2004, ENERGY J, V25, P1  
 McKerracher C, 2013, ENER EFFIC, V6, P387, DOI 10.1007/s12053-012-9169-3  
 Palmer K, 2013, ENER EFFIC, V6, P271, DOI 10.1007/s12053-012-9178-2  
 Schleich J, 2013, ENER POLICY, V61, P1097, DOI 10.1016/j.enpol.2013.05.012  
 Tedenvall M., 2016, 39 LAEE INT C EN EXP  
 Torriti J, 2015, INDOOR BUILT ENVIRON, V24, P891, DOI 10.1177/1420326X15600776  
 Torriti J, 2012, ENER POLICY, V44, P199, DOI 10.1016/j.enpol.2012.01.039  
 WILHITE H, 1995, ENER BUILDINGS, V22, P145, DOI 10.1016/0378-7788(94)00912-4  
 NR 24  
 TC 0  
 Z9 0  
 U1 6  
 U2 11  
 PU ELSEVIER SCI LTD  
 PI OXFORD  
 PA THE BOULEVARD, LANGFORD LANE, KIDLINGTON, OXFORD OX5 1GB, OXON, ENGLAND  
 SN 0301-4215  
 EI 1873-6777  
 J9 ENER POLICY  
 JI Energy Policy  
 PD AUG  
 PY 2017  
 VL 107  
 BP 225  
 EP 233  
 DI 10.1016/j.enpol.2017.05.002  
 PG 9  
 WC Economics; Energy & Fuels; Environmental Sciences; Environmental Studies  
 SC Business & Economics; Energy & Fuels; Environmental Sciences & Ecology  
 GA FA0WU  
 UT WOS:000405158200022  
 DA 2018-05-03  
 ER  
 PT J  
 AU Medjdoub, B  
 Chalal, ML

AF Medjdoub, Benachir

Chalal, Moulay Larbi

TI Impact of household transitions on domestic energy consumption and its applicability to urban energy planning

SO FRONTIERS OF ENGINEERING MANAGEMENT

LA English

DT Article

DE urban energy planning; household transitions; smart cities; energy forecasting; household projection; serious gaming

ID ELECTRICITY; PERFORMANCE; APPLIANCES; SPACE; MODEL; UK

AB The household sector consumes roughly 30% of Earth's energy resources and emits approximately 17% of its carbon dioxide. As such, developing appropriate policies to reduce the CO<sub>2</sub> emissions, which are associated with the world's rapidly growing urban population, is a high priority. This, in turn, will enable the creation of cities that respect the natural environment and the well-being of future generations. However, most of the existing expertise focuses on enhancing the thermal quality of buildings through building physics while few studies address the social and behavioral aspects. In fact, focusing on these aspects should be more prominent, as they cause between 4% and 30% of variation in domestic energy consumption. Premised on that, the aim of this study was to investigate the effect in the context of the UK of household transitions on household energy consumption patterns. To achieve this, we applied statistical procedures (e.g., logistic regression) to official panel survey data comprising more than 5500 households in the UK tracked annually over the course of 18 years. This helped in predicting future transition patterns for different household types for the next 10 to 15 years. Furthermore, it enabled us to study the relationship between the predicted patterns and the household energy usage for both gas and electricity. The findings indicate that the life cycle transitions of a household significantly influence its domestic energy usage. However, this effect is mostly positive in direction and weak in magnitude. Finally, we present our developed urban energy model "EvoEnergy" to demonstrate the importance of incorporating such a concept in energy forecasting for effective sustainable energy decision-making.

C1 [Medjdoub, Benachir; Chalal, Moulay Larbi] Nottingham Trent Univ, Sch Architecture Design & Built Environm, Nottingham NG1 4BU, England.

RP Medjdoub, B (reprint author), Nottingham Trent Univ, Sch Architecture Design & Built Environm, Nottingham NG1 4BU, England.

EM Benachir.Medjdoub@ntu.ac.uk

CR Allison P D, 2006, 31 ANN SAS

Bartiaux F., 2005, ECEEE 2005 SUMMER ST, P1313

Bramlett M D, 2012, VITAL HLTH STAT, V23, P1

Brounen D, 2012, EUR ECON REV, V56, P931, DOI 10.1016/j.euroecorev.2012.02.007

CIA, 2015, WORLD FACTBOOK

DECC, 2015, RPI FUEL LIGHT EL JA

DECC, 2015, ANN FUEL POV STAT RE

DECC, 2015, EN CONS UK

Druckman A, 2008, ENERG POLICY, V36, P3177, DOI 10.1016/j.enpol.2008.03.021

Du RY, 2006, J MARKETING RES, V43, P121, DOI 10.1509/jmkr.43.1.121

Frederiks ER, 2015, ENERGIES, V8, P573, DOI 10.3390/en8010573

Genjo K, 2005, ENERG BUILDINGS, V37, P259, DOI 10.1016/j.enbuild.2004.06.025

Gill ZM, 2010, BUILD RES INF, V38, P491, DOI 10.1080/09613218.2010.505371

Goodman A., 2010, COHABITATION MARRIAG

Greene W W H, 2012, ECONOMETRIC ANAL, V97

HOAGLIN DC, 1986, J AM STAT ASSOC, V81, P991, DOI 10.2307/2289073

JRF, 2005, EFF PAR EMPL OUTC CH

Kornbrot D, 2005, WILEY STATSREF STAT

Kruger A, 2012, INT ARCH PHOTOGRAM M

Longhi S., 2014, ISER WORKING PAPER S

Mansouri I, 1996, APPL ENERG, V54, P211, DOI 10.1016/0306-2619(96)00001-3

NCT, 2014, BAR REM PAR RET WORK

ONS, 2013, DIV ENGL WAL 2013

ONS, 2015, BIRTHS PAR CHAR ENGL

ONS, 2015, CHAPT 5 FIN WEALTH W

ONS, 2014, FAM LAB MARK

ONS, 2013, HOM OWN RENT ENGL WA  
 Santamouris M, 2007, ENERGBUILDINGS, V39, P893, DOI 10.1016/j.enbuild.2006.11.001  
 Santin OG, 2009, ENERGBUILDINGS, V41, P1223, DOI 10.1016/j.enbuild.2009.07.002  
 Skelton C, 2013, SOFT CITY CULTURE TE  
 SONDEREGGER RC, 1978, ENERGBUILDINGS, V1, P313, DOI 10.1016/0378-7788(78)90011-7  
 Steg L, 2009, J ENVIRON PSYCHOL, V29, P309, DOI 10.1016/j.jenvp.2008.10.004  
 VANRAAIJ WF, 1983, J ECON PSYCHOL, V3, P39, DOI 10.1016/0167-4870(83)90057-0  
 Whiting S, 2010, POPULATION MATTERS  
 Wiesmann D, 2011, ENERGPOLICY, V39, P2772, DOI 10.1016/j.enpol.2011.02.047  
 Zhou SJ, 2013, ENERGPOLICY, V61, P394, DOI 10.1016/j.enpol.2013.06.092  
 [Anonymous], 2017, ADVANTAGES DISADVANT

NR 37  
 TC 0  
 Z9 0  
 U1 3  
 U2 3  
 PU HIGHER EDUCATION PRESS  
 PI BEIJING  
 PA NO 4 DEWAI DAJIE, BEIJING 100120, PEOPLES R CHINA  
 SN 2095-7513  
 EI 2096-0255  
 J9 FRONT ENG MANAG  
 JI Front. Eng. Manag.  
 PD JUL  
 PY 2017  
 VL 4  
 IS 2  
 BP 171  
 EP 183  
 DI 10.15302/J-FEM-2017029  
 PG 13  
 WC Engineering, Industrial  
 SC Engineering  
 GA FH1OM  
 UT WOS:000410909300006  
 DA 2018-05-03  
 ER

PT J  
 AU Copiello, S  
   Gabrielli, L  
 AF Copiello, Sergio  
   Gabrielli, Laura  
 TI Analysis of building energy consumption through panel data: The role  
   played by the economic drivers  
 SO ENERGY AND BUILDINGS  
 LA English  
 DT Article  
 DE Energy consumption; Buildings; Panel data; Demand elasticity  
 ID RESIDENTIAL ELECTRICITY CONSUMPTION; NATURAL-GAS CONSUMPTION; CO2  
   EMISSIONS; DWELLING CHARACTERISTICS; EUROPEAN COUNTRIES; UNITED-STATES;  
   DEMAND; DETERMINANTS; EFFICIENCY; OCCUPANTS  
 AB Policy makers have realized that without significant increases in the energy efficiency and notable  
   reductions in the energy use of the household sector, it will be impossible to lower carbon dioxide  
   emissions and mitigate the risks of climate change at the global level. The energy demand in residential  
   buildings is influenced by several parameters, such as national economic growth, climate and weather,  
   demographic structure, and technological development. In this paper, we analyze the determinants of  
   electricity and natural gas consumptions in Italy during the period from 2004 to 2013. We provide

estimates of price and income elasticities of the demand for both the energy sources in the residential sector. The role played by both energy price and household income is worth attention because it provides evidence for the occurrence of the direct rebound effect. Therefore, the economic drivers of the energy demand are important to improve the policies meant to reduce greenhouse gas emissions and contrast the global warming. (C) 2017 Elsevier B.V. All rights reserved.

C1 [Copiello, Sergio] Univ IUAV Venice, Dept Design & Planning, Dorsoduro 2206, I-30123 Venice, Italy.

[Gabielli, Laura] Univ Ferrara, Dept Architecture, Via Quartieri 8, I-44121 Ferrara, Italy.

RP Copiello, S (reprint author), Univ IUAV Venice, Dept Design & Planning, Dorsoduro 2206, I-30123 Venice, Italy.

EM copiello@ivay.it

RI Copiello, Sergio/P-4237-2014

OI Copiello, Sergio/0000-0002-1975-6620

CR Adkins LC, 2014, USING GRETL PRINCIPL

Albatici R, 2009, INDOOR BUILT ENVIRON, V18, P447, DOI 10.1177/1420326X09344278

Amendola N., 2009, RIV POL EC, VIV-VI, P3

Andersen RV, 2009, ENER BUILDINGS, V41, P11, DOI 10.1016/j.enbuild.2008.07.004

Asche F, 2008, ENER J, V29, P27

Autorita per l'Energia e il Gas, 2015, 4220151COM AUT EN GA

Autorita per l'Energia e il Gas, 2002, PRES AD DIR CONC AD

Baiocchi G, 2003, J APPL ECONOM, V18, P105, DOI 10.1002/jae.704

Baker KJ, 2008, APPL ENER, V85, P475, DOI 10.1016/j.apenergy.2007.09.004

Balitskiy S, 2016, RENEW SUST ENER REV, V55, P156, DOI 10.1016/j.rser.2015.10.053

BECK N, 1995, AM POLIT SCI REV, V89, P634, DOI 10.2307/2082979

Bedir M, 2013, ENER BUILDINGS, V58, P194, DOI 10.1016/j.enbuild.2012.10.016

Berardi U., 2016, RESOUR CONSERV RECYC

Berkhout PHG, 2004, ENER ECON, V26, P297, DOI 10.1016/j.eneco.2004.04.002

Bilgili F, 2014, ENER SOURCE PART B, V9, P334, DOI 10.1080/15567249.2010.497793

Bonifaci P, 2016, CESB 2016 CENT EUR T, P1343

Brounen D, 2012, EUR ECON REV, V56, P931, DOI 10.1016/j.eurocorev.2012.02.007

Chen ST, 2007, ENER POLICY, V35, P2611, DOI 10.1016/j.enpol.2006.10.001

Copiello S, 2017, APPL ENER, V193, P491, DOI 10.1016/j.apenergy.2017.02.013

Copiello S, 2017, RENEW SUST ENER REV, V69, P1064, DOI 10.1016/j.rser.2016.09.094

Dale L., 2009, CEC5002009032D

Dergiades T, 2008, ENER ECON, V30, P2722, DOI 10.1016/j.eneco.2008.05.005

Dilaver O, 2014, J NAT GAS SCI ENG, V19, P125, DOI 10.1016/j.jngse.2014.04.002

Druckman T. Jackson, 2008, ENER POLICY, V36, P3167

Erdogdu E, 2010, APPL ENER, V87, P211, DOI 10.1016/j.apenergy.2009.07.006

EUROSTAT, 2011, EN TRANSP ENV IND

Fazeli R, 2016, RENEW SUST ENER REV, V57, P1210, DOI 10.1016/j.rser.2015.12.184

Filippini M, 2004, ENER POLICY, V32, P429, DOI 10.1016/S0301-4215(02)00314-2

Fisher R. A., 1925, STAT METHODS RES WOR

Fraune C, 2015, ENERGY RES SOC SCI, V7, P55, DOI 10.1016/j.erss.2015.02.005

Galvin R, 2014, ENER POLICY, V73, P323, DOI 10.1016/j.enpol.2014.02.033

Glass J, 2008, ENER POLICY, V36, P4534, DOI 10.1016/j.enpol.2008.09.016

Gram-Hanssen K., 2004, P 2004 AM COUNC EN E, P13

Green WH, 2011, ECONOMETRIC ANAL

Greening LA, 2000, ENER POLICY, V28, P389

Guerra-Santin O, 2010, BUILD RES INF, V38, P318, DOI 10.1080/09613211003661074

Guertin C., 2003, DETERMINING DEMAND E

Halicicoglu F, 2007, ENER ECON, V29, P199, DOI 10.1016/j.eneco.2006.11.007

Hansen AR, 2016, ENERGY RES SOC SCI, V11, P109, DOI 10.1016/j.erss.2015.09.002

Lim G. C., 2011, PRINCIPLES ECONOMETR

HIRST E, 1990, RESOUR CONSERV RECY, V3, P267, DOI 10.1016/0921-3449(90)90023-W

Holtedahl P, 2004, ENER ECON, V26, P201, DOI 10.1016/j.eneco.2003.11.001

Hondroyannis G, 2004, ENER ECON, V26, P319, DOI 10.1016/j.eneco.2004.04.001

Horta A, 2014, NAT CULT, V9, P115, DOI 10.3167/nc.2014.090201

Huang BN, 2008, ECOL ECON, V67, P41, DOI 10.1016/j.ecolecon.2007.11.006

Huebner GM, 2015, APPL ENER, V159, P589, DOI 10.1016/j.apenergy.2015.09.028

- International Energy Agency, 2013, TRANS SUST BUILD STR  
 Jones RV, 2015, ENERGBUILDINGS, V101, P24, DOI 10.1016/j.enbuild.2015.04.052  
 Jones RV, 2015, RENEW SUST ENERGBUILDINGS, V43, P901, DOI 10.1016/j.rser.2014.11.084  
 Joutz F., 2009, U S USAEE WP 09 021  
 Kavousian A, 2013, ENERGY, V55, P184, DOI 10.1016/j.energy.2013.03.086  
 Khan MA, 2015, RENEW SUST ENERGBUILDINGS, V49, P1145, DOI 10.1016/j.rser.2015.04.154  
 Ma ZJ, 2012, ENERGBUILDINGS, V55, P889, DOI 10.1016/j.enbuild.2012.08.018  
 Madlener R., 2011, REBOUND EFFECTS GERM  
 McLoughlin F, 2012, ENERGBUILDINGS, V48, P240, DOI 10.1016/j.enbuild.2012.01.037  
 Meier H, 2010, ENERGECON, V32, P949, DOI 10.1016/j.eneco.2009.11.008  
 Miljkovic D, 2016, ENERGECON, V55, P284, DOI 10.1016/j.eneco.2016.02.018  
 Mills B, 2012, ENERGPOLICY, V49, P616, DOI 10.1016/j.enpol.2012.07.008  
 Murphy L., 2016, INT ENCY HOUS HOME, V2012, P110  
 Nachreiner M, 2015, ENERGY RES SOC SCI, V9, P85, DOI 10.1016/j.erss.2015.08.016  
 Nakajima T, 2010, J ASIAN ECON, V21, P412, DOI 10.1016/j.asieco.2010.03.005  
 Narayan PK, 2005, ENERGPOLICY, V33, P467, DOI 10.1016/j.enpol.2003.08.011  
 Navajas FH, 2009, ENERGECON, V31, P162, DOI 10.1016/j.eneco.2008.09.005  
 Nejat P, 2015, RENEW SUST ENERGBUILDINGS, V43, P843, DOI 10.1016/j.rser.2014.11.066  
 Ozturk I, 2010, ENERGPOLICY, V38, P4422, DOI 10.1016/j.enpol.2010.03.071  
 Ozturk I, 2010, ENERGPOLICY, V38, P340, DOI 10.1016/j.enpol.2009.09.024  
 Permana AS, 2015, ENERGY RES SOC SCI, V6, P78, DOI 10.1016/j.erss.2014.12.007  
 Poumanyong P, 2010, ECOL ECON, V70, P434, DOI 10.1016/j.ecolecon.2010.09.029  
 Raty R, 2010, ENERGPOLICY, V38, P646, DOI 10.1016/j.enpol.2009.08.010  
 Salari M, 2016, ENERGPOLICY, V98, P637, DOI 10.1016/j.enpol.2016.09.041  
 Sanquist TF, 2012, ENERGPOLICY, V42, P354, DOI 10.1016/j.enpol.2011.11.092  
 Schipper L, 2000, ENERGPOLICY, V28, P351  
 Schmalensee R, 1998, REV ECON STAT, V80, P15, DOI 10.1162/003465398557294  
 Sorrell S, 2015, RENEW SUST ENERGBUILDINGS, V47, P74, DOI 10.1016/j.rser.2015.03.002  
 Steemers K, 2009, BUILD RES INF, V37, P625, DOI 10.1080/09613210903186661  
 STIMSON JA, 1985, AM J POLIT SCI, V29, P914, DOI 10.2307/2111187  
 Stoknes PE, 2014, ENERGY RES SOC SCI, V1, P161, DOI 10.1016/j.erss.2014.03.007  
 Streimikiene D, 2014, RENEW SUST ENERGBUILDINGS, V35, P285, DOI 10.1016/j.rser.2014.04.012  
 Tiwari P, 2000, J POLICY MODEL, V22, P81, DOI 10.1016/S0161-8938(98)00003-9  
 Tjorring L, 2016, ENERGY RES SOC SCI, V22, P115, DOI 10.1016/j.erss.2016.08.008  
 von Grabe J, 2016, ENERGY RES SOC SCI, V14, P46, DOI 10.1016/j.erss.2016.01.002  
 von Grabe J, 2016, ENERGY RES SOC SCI, V12, P75, DOI 10.1016/j.erss.2015.12.001  
 Von Thadden G., 2011, EUROPE TODAY, V4  
 Wang SS, 2011, ENERGPOLICY, V39, P4870, DOI 10.1016/j.enpol.2011.06.032  
 WHITE H, 1980, ECONOMETRICA, V48, P817, DOI 10.2307/1912934  
 Wiesmann D, 2011, ENERGPOLICY, V39, P2772, DOI 10.1016/j.enpol.2011.02.047  
 Yohanis YG, 2008, ENERGBUILDINGS, V40, P1053, DOI 10.1016/j.enbuild.2007.09.001  
 Yoo SH, 2009, APPL ENERGBUILDINGS, V86, P460, DOI 10.1016/j.apenergy.2008.08.023  
 Yu YH, 2014, ENERGPOLICY, V70, P57, DOI 10.1016/j.enpol.2014.03.032  
 Ziramba E, 2008, ENERGPOLICY, V36, P3460, DOI 10.1016/j.enpol.2008.05.026  
 [Anonymous], 2010, ENERDATA DEFINITION

NR 91

TC 0

Z9 0

U1 2

U2 6

PU ELSEVIER SCIENCE SA

PI LAUSANNE

PA PO BOX 564, 1001 LAUSANNE, SWITZERLAND

SN 0378-7788

EI 1872-6178

J9 ENERGBUILDINGS

JI Energy Build.

PD JUN 15

PY 2017

VL 145

BP 130

EP 143

DI 10.1016/j.enbuild.2017.03.053

PG 14

WC Construction & Building Technology; Energy & Fuels; Engineering, Civil

SC Construction & Building Technology; Energy & Fuels; Engineering

GA EV2OB

UT WOS:000401593900011

DA 2018-05-03

ER

PT J

AU Olsthoorn, M

Schleich, J

Hirzel, S

AF Olsthoorn, Mark

Schleich, Joachim

Hirzel, Simon

TI Adoption of Energy Efficiency Measures for Non-residential Buildings:

Technological and Organizational Heterogeneity in the Trade, Commerce  
and Services Sector

SO ECOLOGICAL ECONOMICS

LA English

DT Article

DE Energy efficiency; Barriers; Agency; Absorptive capacity; Adoption; SMEs

ID MEDIUM-SIZED ENTERPRISES; ENVIRONMENTAL-MANAGEMENT; ABSORPTIVE-CAPACITY;  
EMPIRICAL-EVIDENCE; MANUFACTURING SMES; DECISION-MAKING; DRIVING FORCES;  
BARRIERS; INNOVATION; INVESTMENTS

AB Drawing on agency theory and absorptive capacity literature, this paper empirically analyzes factors of adoption and barriers to adoption of four crosscutting, ancillary energy efficiency measures (EEMs) for non-residential buildings (efficient lighting, building insulation, heating system replacement, and optimization of heating system operations). The empirical analysis employs a large representative sample of organizations in the German trade, commerce and services sector. Results from econometric analyses provide evidence for a negative effect of principal agent relationships (landlord-tenant; owner-user of energy supply equipment; parent-subsidiary) and for a positive effect of organizational attributes that contribute to absorptive capacity (energy manager in place; energy audit conducted; experience with decentralized low carbon energy). However, the significance of these effects varies by measure. For non-adopters, heterogeneity of crosscutting ancillary EEMs has little impact on the ranking of barriers to adoption. The most relevant barriers for all EEMs are rented spaces, high investment costs, and other priorities; least relevant are technical risk to production and risk to product quality. Finally, we find little evidence for differences in the factors of adoption and barriers to adoption between manufacturing and non-manufacturing organizations. These findings are robust to alternative model specifications.(C) 2017 Elsevier B.V. All rights reserved.

C1 [Olsthoorn, Mark; Schleich, Joachim] Grenoble Ecole Management, Dept Management Technol & Strategy, 12 Rue Pierre Semard, F-38000 Grenoble, France.

[Schleich, Joachim; Hirzel, Simon] Fraunhofer Inst Syst & Innovat Res, Dept Energy Policy & Energy Mkt, Breslauer Str 48, D-76139 Karlsruhe, Germany.

[Schleich, Joachim] Virginia Polytech Inst & State Univ, Dept Agr & Appl Econ, Blacksburg, VA 24061 USA.

RP Olsthoorn, M (reprint author), Grenoble Ecole Management, Dept Management Technol & Strategy, 12 Rue Pierre Semard, F-38000 Grenoble, France.

EM mark.olsthoorn@grenoble-em.com

OI Schleich, Joachim/0000-0001-6079-7240

CR AGEB (Arbeitsgemeinschaft Energiebilanzen), 2016, EN BUND DEUTSCHL 201

AKERLOF GA, 1970, Q J ECON, V84, P488, DOI 10.2307/1879431

Anderson ST, 2004, RESOUR ENERGY ECON, V26, P27, DOI 10.1016/j.reseneeco.2003.07.001



- Aramyan LH, 2007, AGR SYST, V94, P520, DOI 10.1016/j.agry.2007.01.005
- BLUMSTEIN C, 1980, ENERGY, V5, P355, DOI 10.1016/0360-5442(80)90036-5
- Cagno E, 2013, RENEW SUST ENERG REV, V19, P290, DOI 10.1016/j.rser.2012.11.007
- Cagno E, 2015, ENERG POLICY, V83, P240, DOI 10.1016/j.enpol.2015.02.023
- Cagno E, 2014, J CLEAN PROD, V82, P70, DOI 10.1016/j.jclepro.2014.06.057
- COHEN WM, 1990, ADMIN SCI QUART, V35, P128, DOI 10.2307/2393553
- Cooremans C, 2012, ENERG EFFIC, V5, P497, DOI 10.1007/s12053-012-9154-x
- Cooremans C, 2011, ENERG EFFIC, V4, P473, DOI 10.1007/s12053-011-9125-7
- DAMANPOUR F, 1991, ACAD MANAGE J, V34, P555, DOI 10.2307/256406
- Damanpour F, 2006, BRIT J MANAGE, V17, P215, DOI 10.1111/j.1467-8551.2006.00498.x
- Darnall N, 2006, STRATEGIC MANAGE J, V27, P301, DOI 10.1002/smj.518
- Darnall N, 2008, J INT MANAG, V14, P364, DOI 10.1016/j.intman.2007.09.006
- de Almeida ELF, 1998, ENERG POLICY, V26, P643, DOI 10.1016/S0301-4215(98)00023-8
- de Groot HLF, 2001, ENERG ECON, V23, P717, DOI 10.1016/S0140-9883(01)00083-4
- DeCanio SJ, 1998, REV ECON STAT, V80, P95, DOI 10.1162/003465398557366
- DeCanio SJ, 1998, ENERG POLICY, V26, P441, DOI 10.1016/S0301-4215(97)00152-3
- DECANIO SJ, 1994, J ECON BUS, V1, P105
- Delmas M, 2011, BUS SOC, V50, P116, DOI 10.1177/0007650310394400
- Delmas MA, 2015, LONG RANGE PLANN, V48, P80, DOI 10.1016/j.lrp.2013.08.014
- Diederer P, 2003, ENVIRON RESOUR ECON, V24, P379, DOI 10.1023/A:1023617318184
- Eichholtz P, 2013, REV ECON STAT, V95, P50, DOI 10.1162/REST\_a\_00291
- EISENHARDT KM, 1989, ACAD MANAGE REV, V14, P57, DOI 10.5465/AMR.1989.4279003
- Fleiter T, 2012, ENERG POLICY, V51, P863, DOI 10.1016/j.enpol.2012.09.041
- Fleiter T, 2012, ENERG POLICY, V51, P502, DOI 10.1016/j.enpol.2012.08.054
- Frondel M, 2008, ECOL ECON, V66, P153, DOI 10.1016/j.ecolecon.2007.08.016
- Frondel M, 2013, ENVIRON RESOUR ECON, V55, P407, DOI 10.1007/s10640-013-9632-4
- Fuerst F, 2011, ECOL ECON, V70, P1220, DOI 10.1016/j.ecolecon.2011.01.026
- Galvin R, 2016, ENERGY RES SOC SCI, V11, P155, DOI 10.1016/j.erss.2015.10.001
- Gatignon H., 2015, MAKING INNOVATION, V2
- Gerarden T. D., 2015, ASSESSING ENERGY EFF
- Gillingham K, 2014, REV ENV ECON POLICY, V8, P18, DOI 10.1093/reep/ret021
- Goulden M, 2015, ENERG POLICY, V85, P280, DOI 10.1016/j.enpol.2015.06.014
- Greene W, 2012, ECONOMETRIC ANAL
- GRUBER E, 1991, ENERG POLICY, V19, P279, DOI 10.1016/0301-4215(91)90152-E
- HOLMSTROM B, 1979, BELL J ECON, V10, P74, DOI 10.2307/3003320
- IEA, 2012, WORLD EN OUTL 2012
- ifeu-Institut für Energie- und Umweltforschung Heidelberg, 2011, EN POT VOLKSW EFF IN
- JAFFE AB, 1994, ENERG POLICY, V22, P804, DOI 10.1016/0301-4215(94)90138-4
- JAFFE AB, 1994, RESOUR ENERGY ECON, V16, P91, DOI 10.1016/0928-7655(94)90001-9
- Kemp R., 1997, ENV POLICY
- King AA, 2005, ACAD MANAGE J, V48, P1091, DOI 10.5465/AMJ.2005.19573111
- Kostka G., 2011, WORKING PAPER SERIES
- Kounetas K, 2008, ENERG ECON, V30, P2517, DOI 10.1016/j.eneco.2007.03.002
- Lenox M, 2004, STRATEGIC MANAGE J, V25, P331, DOI 10.1002/smj.379
- Martin R, 2012, J ENVIRON ECON MANAG, V63, P208, DOI 10.1016/j.jeem.2011.08.003
- MILLIKEN FJ, 1987, ACAD MANAGE REV, V12, P133, DOI 10.2307/257999
- Muthulingam S., 2011, INVESTMENT ENERGY EF
- Nolden C, 2016, ENERG POLICY, V98, P420, DOI 10.1016/j.enpol.2016.08.041
- Ostertag Katrin, 2003, NO REGRET POTENTIALS
- Palmer K, 2013, ENERG EFFIC, V6, P271, DOI 10.1007/s12053-012-9178-2
- Paramonova S, 2015, RENEW SUST ENERG REV, V51, P472, DOI 10.1016/j.rser.2015.06.012
- Pekovic S, 2010, J ECON ISSUES, V44, P895, DOI 10.2753/JEI0021.3624440403
- Pierce J L, 1977, ACAD MANAGE REV, V2, P27
- Pinkse J, 2010, INT BUS REV, V19, P160, DOI 10.1016/j.ibusrev.2009.11.005
- PNNL, 2009, PNNL18337
- Polzin F., 2015, SPRU WORKING PAPER S
- Rogers E., 2003, DIFFUSION INNOVATION
- Rogers E. M., 1971, COMMUNICATION INNOVA

- Rohdin P, 2006, ENERGY, V31, P1836, DOI 10.1016/j.energy.2005.10.010
- Rohdin P, 2007, ENER POLICY, V35, P672, DOI 10.1016/j.enpol.2006.01.010
- ROSS PF, 1974, PERS PSYCHOL, V27, P21, DOI 10.1111/j.1744-6570.1974.tb02061.x
- Sardianou E, 2008, J CLEAN PROD, V16, P1416, DOI 10.1016/j.jclepro.2007.08.002
- Schleich J., 2004, International Journal of Energy Technology and Policy, V2, P226, DOI 10.1504/IJETP.2004.005155
- Schleich J, 2008, ENER ECON, V30, P449, DOI 10.1016/j.eneco.2006.08.004
- Schleich J, 2009, ECOL ECON, V68, P2150, DOI 10.1016/j.ecolecon.2009.02.008
- Schlomann B., 2015, ENERGIEVERBRAUCH SEK
- Sharma S, 1998, STRATEGIC MANAGE J, V19, P729, DOI 10.1002/(SICI)1097-0266(199808)19:8<729::AID-SMJ967>3.3.CO;2-W
- Sorrell Steve, 2004, EC ENERGY EFFICIENCY
- Thollander P., 2013, IMPROVING ENERGY EFF
- Thollander P, 2007, ENER POLICY, V35, P5774, DOI 10.1016/j.enpol.2007.06.013
- Thollander P, 2008, ENER EFFIC, V1, P21, DOI 10.1007/s12053-007-9001-7
- TORNATZKY LG, 1982, IEEE T ENG MANAGE, V29, P28, DOI 10.1109/TEM.1982.6447463
- Trianni A, 2016, APPL ENER, V162, P1537, DOI 10.1016/j.apenergy.2015.02.078
- Trianni A, 2014, APPL ENER, V118, P207, DOI 10.1016/j.apenergy.2013.12.042
- Trianni A, 2013, ENER POLICY, V61, P430, DOI 10.1016/j.enpol.2013.06.034
- Trianni A, 2012, ENERGY, V37, P494, DOI 10.1016/j.energy.2011.11.005
- TUSHMAN ML, 1977, ADMIN SCI QUART, V22, P587, DOI 10.2307/2392402
- Velthuijsen J.W., 1995, DETERMINANTS INVESTM
- Wagner M, 2008, ECOL ECON, V66, P392, DOI 10.1016/j.ecolecon.2007.10.001
- Wejnert B, 2002, ANNU REV SOCIOL, V28, P297, DOI 10.1146/annurev.soc.28.110601.141051

NR 83

TC 0

Z9 0

U1 5

U2 45

PU ELSEVIER SCIENCE BV

PI AMSTERDAM

PA PO BOX 211, 1000 AE AMSTERDAM, NETHERLANDS

SN 0921-8009

EI 1873-6106

J9 ECOL ECON

JI Ecol. Econ.

PD JUN

PY 2017

VL 136

BP 240

EP 254

DI 10.1016/j.ecolecon.2017.02.022

PG 15

WC Ecology; Economics; Environmental Sciences; Environmental Studies

SC Environmental Sciences & Ecology; Business & Economics

GA EP9KS

UT WOS:000397693100023

DA 2018-05-03

ER

PT J

AU Binita, KC

Ruth, M

AF Binita, K. C.

Ruth, Matthias

TI Estimation and projection of institutional building electricity  
consumption

SO ENERGY AND BUILDINGS

LA English

DT Article

DE Building; Temperature; Projection; Balance point; Electricity

ID NATURAL-GAS CONSUMPTION; HEATING ENERGY-CONSUMPTION; CLIMATE-CHANGE;

OFFICE BUILDINGS; RESIDENTIAL SECTOR; GREEN ROOF; PERFORMANCE

EVALUATION; THERMOCHROMIC WINDOWS; OCCUPANT BEHAVIOR; CARBON EMISSIONS

AB This study provides understanding of the influence of outside temperature on intuitional buildings in an urban landscape. We derive heating and cooling degree days for each of the buildings by identifying an appropriate choice of balance point temperatures and perform multiple linear regression seasonally to characterize the temperature-electricity use relations.

Our study reveals considerable differences in temperature-electricity relationships based on building use and characteristics. In addition to outside temperature, the weekday effect has large influences on electricity consumption of buildings. Summer months have greater influence of outside temperature on electricity consumption followed by transition months and winter as an increase in one cooling degree day (CDD) increases daily electricity consumption by 0.124 kW/m<sup>2</sup> whereas during winter, one heating degree day (HDD) increases daily electricity consumption by 0.025 kW/m<sup>2</sup> and by 0.099 kW/m<sup>2</sup> during transition months. We apply two kinds of models to project electricity demand for projected temperature profiles in 2030. Both cases strongly suggest higher electricity demand not just in summer months but also during transition periods in spring and fall. Overall, electricity demand increases by 0.95% under a low emission scenario (RCP 4.5) and 2.03% under a high emission scenario (RCP 8.5), which is likely to put immense pressure on the United States electric grid system and an overall increase in the energy cost by 2030. (C) 2017 Elsevier B.V. All rights reserved.

C1 [Binita, K. C.] Northeastern Univ, Sch Publ Policy & Urban Affairs, Resilient Cities Lab, Boston, MA 20115 USA.

[Ruth, Matthias] Northeastern Univ, Sch Publ Policy & Urban Affairs, Resilient Cities Lab, Dept Civil & Environm Engn, Boston, MA 20115 USA.

[Binita, K. C.] Oak Ridge Natl Lab, Div Environm Sci, One Bethel Valley Rd, POB 2008 MS6301, Oak Ridge, TN 37831 USA.

RP Binita, KC (reprint author), Northeastern Univ, Sch Publ Policy & Urban Affairs, Resilient Cities Lab, Boston, MA 20115 USA.; Binita, KC (reprint author), Oak Ridge Natl Lab, Div Environm Sci, One Bethel Valley Rd, POB 2008 MS6301, Oak Ridge, TN 37831 USA.

EM kcb1@ornl.gov

FU Northeastern University, Boston, Massachusetts, USA

FX This work was funded and supported by Northeastern University, Boston, Massachusetts, USA.

CR Aldawoud A, 2013, ENERB BUILDINGS, V59, P104, DOI 10.1016/j.enbuild.2012.12.031

Allouhi A, 2015, J CLEAN PROD, V109, P118, DOI 10.1016/j.jclepro.2015.05.139

Amato AD, 2005, CLIMATIC CHANGE, V71, P175, DOI 10.1007/s10584-005-5931-2

Asadoorian MO, 2008, ENERB ECON, V30, P1577, DOI 10.1016/j.eneco.2007.02.003

Auffhammer M, 2014, ENERB ECON, V46, P522, DOI 10.1016/j.eneco.2014.04.017

Auffhammer M, 2011, CLIMATIC CHANGE, V109, P191, DOI 10.1007/s10584-011-0299-y

Balaras CA, 2005, ENERB BUILDINGS, V37, P429, DOI 10.1016/j.enbuild.2004.08.003

Balaras CA, 2007, BUILD ENVIRON, V42, P1298, DOI 10.1016/j.buildenv.2005.11.001

Barnett AG, 2012, ENVIRON RES, V112, P218, DOI 10.1016/j.envres.2011.12.010

Berardi U, 2013, SUSTAIN CITIES SOC, V8, P72, DOI 10.1016/j.scs.2013.01.008

Bessec M, 2008, ENERB ECON, V30, P2705, DOI 10.1016/j.eneco.2008.02.003

Bianco V, 2014, ENERB CONVERS MANAGE, V87, P754, DOI 10.1016/j.enconman.2014.07.081

Bin S, 2005, ENERB POLICY, V33, P197, DOI 10.1016/S0301-4215(03)00210-6

Bodart M, 2002, ENERB BUILDINGS, V34, P421, DOI 10.1016/S0378-7788(01)00117-7

Brown M. A., 2014, 2014 ACEEE SUMM STUD, P26

Castleton HF, 2010, ENERB BUILDINGS, V42, P1582, DOI 10.1016/j.enbuild.2010.05.004

Chan HY, 2010, RENEW SUST ENERB REV, V14, P781, DOI 10.1016/j.rser.2009.10.030

Chappells H, 2005, BUILD RES INF, V33, P32, DOI 10.1080/0961321042000322762

Christenson M, 2006, ENERB CONVERS MANAGE, V47, P671, DOI 10.1016/j.enconman.2005.06.009

Chwieduk D, 2003, APPL ENERB, V76, P211, DOI 10.1016/S0306-2619(03)00059-X

Considine TJ, 2000, RESOUR ENERB ECON, V22, P295, DOI 10.1016/S0928-7655(00)00027-0

de Dear R, 2001, INT J BIOMETEOROL, V45, P100, DOI 10.1007/s004840100093

Deschenes O, 2011, AM ECON J-APPL ECON, V3, P152, DOI 10.1257/app.3.4.152

- Donovan J. J., 1976, FACTORS AFFECTING RE  
EIA, 2014, EN EFF IND ESS POL M  
EIA (Energy Information Administration), 2015, ANN EN OUTL 2015 PRO  
Eichholtz P, 2010, AM ECON REV, V100, P2492, DOI 10.1257/aer.100.5.2492  
ENGLE RF, 1986, J AM STAT ASSOC, V81, P310, DOI 10.2307/2289218  
ETO JH, 1988, ENERGBUILDINGS, V12, P113, DOI 10.1016/0378-7788(88)90073-4  
Fazeli R, 2016, URBAN CLIM, V15, P45, DOI 10.1016/j.uclim.2016.01.001  
Fioretti R, 2010, BUILD ENVIRON, V45, P1890, DOI 10.1016/j.buildenv.2010.03.001  
Florides GA, 2002, APPL ENERGBUILDINGS, V73, P299, DOI 10.1016/S0306-2619(02)00119-8  
Franco G, 2008, CLIMATIC CHANGE, V87, p5139, DOI 10.1007/s10584-007-9364-y  
Getter KL, 2011, ENERGBUILDINGS, V43, P3548, DOI 10.1016/j.enbuild.2011.09.018  
Giannakopoulos C, 2006, CLIMATE RES, V31, P97, DOI 10.3354/cr031097  
Gul MS, 2015, ENERGBUILDINGS, V87, P155, DOI 10.1016/j.enbuild.2014.11.027  
Heim RR, 2003, J APPL METEOROL, V42, P1435, DOI 10.1175/1520-0450(2003)042<1435:TRAMTN>2.0.CO;2  
Henley A, 1997, OXFORD B ECON STAT, V59, P149, DOI 10.1111/1468-0084.00054  
Hoffmann S, 2014, SOL ENERGMAT SOL C, V123, P65, DOI 10.1016/j.solmat.2013.12.017  
Hughes BR, 2014, APPL ENERGBUILDINGS, V113, P127, DOI 10.1016/j.apenergy.2013.07.019  
HURVICH CM, 1989, BIOMETRIKA, V76, P297, DOI 10.2307/2336663  
IPCC, 2014, CLIMATE CHANGE 2014  
Isaac M, 2009, ENERGPOLICY, V37, P507, DOI 10.1016/j.enpol.2008.09.051  
Jaffal I, 2012, RENEW ENERGBUILDINGS, V43, P157, DOI 10.1016/j.renene.2011.12.004  
Jaggs M, 2000, ENERGBUILDINGS, V31, P97, DOI 10.1016/S0378-7788(99)00023-7  
Joudi A, 2013, APPL ENERGBUILDINGS, V103, P562, DOI 10.1016/j.apenergy.2012.10.019  
Juan YK, 2010, ENERGBUILDINGS, V42, P290, DOI 10.1016/j.enbuild.2009.09.006  
Kamalisarvestani M, 2013, RENEW SUST ENERGBUILDINGS, V26, P353, DOI 10.1016/j.rser.2013.05.038  
Kazanci OB, 2014, ENERGBUILDINGS, V83, P122, DOI 10.1016/j.enbuild.2013.12.064  
Klein L, 2012, AUTOMAT CONSTR, V22, P525, DOI 10.1016/j.autcon.2011.11.012  
Labriet M., 2013, SSES ANN C 2013, P2013  
Lam JC, 2004, ENERGBUILDINGS, V45, P829, DOI 10.1016/S0196-8904(03)00197-3  
Lam JC, 1998, ENERGBUILDINGS, V39, P623, DOI 10.1016/S0196-8904(97)10008-5  
Lam JC, 2010, ENERGBUILDINGS, V51, P2692, DOI 10.1016/j.enconman.2010.06.004  
Li L, 2016, ENERGBUILDINGS, V113, P189, DOI 10.1016/j.enbuild.2015.12.040  
Linder K.P., 1990, POTENTIAL EFFECTS GL, P1990  
Ludlow J, 2000, INT J FORECASTING, V16, P333, DOI 10.1016/S0169-2070(00)00048-0  
Masoso OT, 2010, ENERGBUILDINGS, V42, P173, DOI 10.1016/j.enbuild.2009.08.009  
Mattinen MK, 2014, J CLEAN PROD, V81, P70, DOI 10.1016/j.jclepro.2014.05.054  
Moral-Carcedo J, 2005, ENERGBUILDINGS, V27, P477, DOI 10.1016/j.eneco.2005.01.003  
Mwasha A, 2011, ENERGBUILDINGS, V43, P2108, DOI 10.1016/j.enbuild.2011.04.013  
Nall D., 1979, ASHRAE T, V85, P722  
Niachou A., 2008, ENERGY BUILD, V40, P1466  
Nikoofard S, 2014, ENERGBUILDINGS, V69, P354, DOI 10.1016/j.enbuild.2013.11.023  
Pacheco R, 2012, RENEW SUST ENERGBUILDINGS, V16, P3559, DOI 10.1016/j.rser.2012.03.045  
Pardo A, 2002, ENERGBUILDINGS, V24, P55, DOI 10.1016/S0140-9883(01)00082-2  
Passer A, 2012, INT J LIFE CYCLE ASS, V17, P1116, DOI 10.1007/s11367-012-0435-6  
Perez G, 2011, APPL ENERGBUILDINGS, V88, P4854, DOI 10.1016/j.apenergy.2011.06.032  
QUAYLE RG, 1980, J APPL METEOROL, V19, P241, DOI 10.1175/1520-0450(1980)019<0241:HDDDAT>2.0.CO;2  
R Core Team, 2016, R LANG ENV STAT COMP  
Raman Aaswath P, 2014, Nature, V515, P540, DOI 10.1038/nature13883  
Ratti C, 2005, ENERGBUILDINGS, V37, P762, DOI 10.1016/j.enbuild.2004.10.010  
Ruth M, 2006, ENERGPOLICY, V34, P2820, DOI 10.1016/j.enpol.2005.04.016  
Sadineni SB, 2011, RENEW SUST ENERGBUILDINGS, V15, P3617, DOI 10.1016/j.rser.2011.07.014  
Sailor DJ, 2012, J BUILD PHYS, V35, P372, DOI 10.1177/1744259111420076  
Sailor DJ, 1997, ENERGY, V22, P987, DOI 10.1016/S0360-5442(97)00034-0  
Santamouris M, 2014, SOL ENERGY, V103, P682, DOI 10.1016/j.solener.2012.07.003  
Santamouris M, 2001, SOL ENERGY, V70, P201, DOI 10.1016/S0038-092X(00)00095-5  
Santin OG, 2009, ENERGBUILDINGS, V41, P1223, DOI 10.1016/j.enbuild.2009.07.002

- Santoyo-Castelazo E, 2014, J CLEAN PROD, V80, P119, DOI 10.1016/j.jclepro.2014.05.061  
 Sarak H, 2003, ENERGY, V28, P929, DOI 10.1016/S0360-5442(03)00035-5  
 SCHIPPER L, 1989, ANNU REV ENERGY, V14, P273, DOI 10.1146/annurev.eg.14.110189.001421  
 Shen H, 2013, BUILD ENVIRON, V59, P303, DOI 10.1016/j.buildenv.2012.08.028  
 Shorr N, 2009, CLIM RES, V39, P19, DOI 10.3354/cr00782  
 Sozer H, 2010, BUILD ENVIRON, V45, P2581, DOI 10.1016/j.buildenv.2010.05.004  
 Sun CJ, 2014, SOL ENERGY, V102, P1, DOI 10.1016/j.solener.2014.01.008  
 Tahmasebi MM, 2011, PROCEDIA ENGINEER, V21, P820, DOI 10.1016/j.proeng.2011.11.2083  
 Timmer RP, 2007, J APPL METEOROL CLIM, V46, P1993, DOI 10.1175/2007JAMC1552.1  
 Valor E, 2001, J APPL METEOROL, V40, P1413, DOI 10.1175/1520-0450(2001)040<1413:DATAEL>2.0.CO;2  
 Virote J, 2012, ENERG BUILDINGS, V53, P183, DOI 10.1016/j.enbuild.2012.06.001  
 Vu DH, 2015, APPL ENERG, V140, P385, DOI 10.1016/j.apenergy.2014.12.011  
 Wan KKW, 2011, BUILD ENVIRON, V46, P223, DOI 10.1016/j.buildenv.2010.07.016  
 Wang WM, 2005, BUILD ENVIRON, V40, P1512, DOI 10.1016/j.buildenv.2004.11.017  
 Weber C, 2000, ENERG POLICY, V28, P549, DOI 10.1016/S0301-4215(00)00040-9  
 Wilhite H, 1996, ENERG POLICY, V24, P795, DOI 10.1016/0301-4215(96)00061-4  
 Wong NH, 2003, ENERG BUILDINGS, V35, P353, DOI 10.1016/S0378-7788(02)00108-1  
 Xu PP, 2015, J CLEAN PROD, V107, P378, DOI 10.1016/j.jclepro.2014.12.101  
 Yang J, 2015, APPL ENERG, V159, P502, DOI 10.1016/j.apenergy.2015.08.130  
 Ye H, 2014, RENEW ENERG, V66, P215, DOI 10.1016/j.renene.2013.12.008  
 Yu Z, 2011, ENERG BUILDINGS, V43, P1409, DOI 10.1016/j.enbuild.2011.02.002  
 Zhang YP, 2007, BUILD ENVIRON, V42, P2197, DOI 10.1016/j.buildenv.2006.07.023  
 Zheng SJ, 2015, SOL ENERGY, V112, P263, DOI 10.1016/j.solener.2014.09.049  
 Zhu JJ, 2013, HABITAT INT, V37, P148, DOI 10.1016/j.habitatint.2011.12.006

NR 103

TC 0

Z9 0

U1 3

U2 7

PU ELSEVIER SCIENCE SA

PI LAUSANNE

PA PO BOX 564, 1001 LAUSANNE, SWITZERLAND

SN 0378-7788

EI 1872-6178

J9 ENERG BUILDINGS

JI Energy Build.

PD MAY 15

PY 2017

VL 143

BP 43

EP 52

DI 10.1016/j.enbuild.2017.03.034

PG 10

WC Construction & Building Technology; Energy & Fuels; Engineering, Civil

SC Construction & Building Technology; Energy & Fuels; Engineering

GA ET4BD

UT WOS:000400223100005

DA 2018-05-03

ER

PT J

AU Chiaroni, D

Chiesa, V

Franzo, S

Frattini, F

Latilla, VM

AF Chiaroni, Davide

Chiesa, Vittorio

Franzo, Simone  
Frattini, Federico  
Latilla, Vito Manfredi

TI Overcoming internal barriers to industrial energy efficiency through energy audit: a case study of a large manufacturing company in the home appliances industry

SO CLEAN TECHNOLOGIES AND ENVIRONMENTAL POLICY

LA English

DT Article

DE Energy efficiency; Energy audit; Energy efficiency barriers; Manufacturing sector

ID DATA ENVELOPMENT ANALYSIS; MEDIUM-SIZED ENTERPRISES; KEY PERFORMANCE INDICATORS; CEMENT INDUSTRY; PRODUCTIVITY; MANAGEMENT; PERSPECTIVES; DRIVERS; POLICY; POWER

AB Energy efficiency plays a key role in reducing global energy consumption, especially in the industrial sector, with an indirect positive impact on the competitiveness of industrial firms. Although a cultural shift toward recognizing the strategic importance of energy efficient and environmental friendly solutions is diffusing among industrial companies, also pushed by the evolution of local and international regulatory frameworks, strong barriers hampering the adoption of energy efficiency measures (EEMs) still exist. These barriers, and in particular those linked to behavioral issues, may be overcome by the use of a well-designed energy audit methodology. However, how energy audit can help overcome behavioral barriers to industrial energy efficiency remains an under-researched topic in literature. This paper presents and discusses a novel methodology for energy audit developed and implemented by a large manufacturing company. The methodology is built around four phases, and it pays special emphasis to the initial step of the audit, where the strongest resistance to the implementation of EEMs is typically found due to a lack of awareness and commitment which hampers the identification of needs and opportunities associated with the adoption of EEMs. The proposed methodology has been able to overcome in practice the typical behavioral barriers that affect the implementation of EEMs in the manufacturing sector and has strong applicability in other firms and industries.

C1 [Chiaroni, Davide; Chiesa, Vittorio; Franzo, Simone; Frattini, Federico; Latilla, Vito Manfredi] Politecn Milan, Dipartimento Ingn Gest, Piazza Leonardo da Vinci 32, I-20133 Milan, Italy.

RP Franzo, S (reprint author), Politecn Milan, Dipartimento Ingn Gest, Piazza Leonardo da Vinci 32, I-20133 Milan, Italy.

EM simone.franzo@polimi.it

OI Franzo, Simone/0000-0002-2368-4295

CR Abdelaziz EA, 2011, RENEW SUST ENERG REV, V15, P150, DOI 10.1016/j.rser.2010.09.003

Amrina E, 2015, PROC CIRP, V26, P19, DOI 10.1016/j.procir.2014.07.173

Hanzl-Weiss Doris, 2015, 405 VIENN I INT EC S

Benedetti M, 2015, ENERGY EFFICIENCY IMPROVEMENTS IN SMART GRID COMPONENTS, P41, DOI 10.5772/59820

Blok V, 2015, J CLEAN PROD, V108, P19, DOI 10.1016/j.jclepro.2015.04.119

Blomberg J, 2012, ENERG POLICY, V42, P569, DOI 10.1016/j.enpol.2011.12.026

Boyd GA, 2000, ENERG POLICY, V28, P289, DOI 10.1016/S0301-4215(00)00016-1

Broeren MLM, 2014, ENERG POLICY, V64, P273, DOI 10.1016/j.enpol.2013.09.025

Brones FA, 2017, J CLEAN PROD, V142, P8, DOI 10.1016/j.jclepro.2016.09.009

Bunse K, 2011, J CLEAN PROD, V19, P667, DOI 10.1016/j.jclepro.2010.11.011

Cagno E, 2013, RENEW SUST ENERG REV, V19, P290, DOI 10.1016/j.rser.2012.11.007

Cagno E, 2014, ENRGY PROCED, V61, P1256, DOI 10.1016/j.egypro.2014.11.1073

Cagno E, 2014, J CLEAN PROD, V82, P70, DOI 10.1016/j.jclepro.2014.06.057

Cataldo A, 2015, CIRP J MANUF SCI TEC, V11, P53, DOI 10.1016/j.cirpj.2015.08.001

Chan Y, 2015, STUDY ENERGY EFFICIE

Chiaroni D, 2016, SUSTAIN ENERGY TECHN, V15, P1, DOI 10.1016/j.seta.2016.02.004

Dufloou JR, 2012, CIRP ANN-MANUF TECHN, V61, P587, DOI 10.1016/j.cirp.2012.05.002

EISENHARDT KM, 1989, ACAD MANAGE REV, V14, P532, DOI 10.2307/258557

ElMaraghy HA, 2017, J CLEAN PROD, V163, P36, DOI 10.1016/j.jclepro.2015.12.026

[Anonymous], 2016, 124641 EN

Energy & Strategy Group, 2016, EN EFF ERP

Eurostat, 2015, CONS EN

European Commission, 2016, COMM COMM EUR PARL C  
Gerstlberger W, 2016, J ENG TECHNOL MANAGE, V40, P87, DOI 10.1016/j.jengtecman.2016.04.004  
HIRST E, 1990, RESOUR CONSERV RECY, V3, P267, DOI 10.1016/0921-3449(90)90023-W  
International Electrotechnical Commission, 2014, 6003430 IEC  
Kang D, 2016, J CLEAN PROD, V135, P184, DOI 10.1016/j.jclepro.2016.06.042  
Laitner JA, 2013, ENVIRON INNOV SOC TR, V9, P38, DOI 10.1016/j.eist.2013.09.005  
Langlois-Bertrand S, 2015, ENERGY STRATEG REV, V8, P30, DOI 10.1016/j.esr.2015.08.001  
Lee D, 2016, RENEW SUST ENERG REV, V56, P760, DOI 10.1016/j.rser.2015.11.067  
Lozano R, 2013, CORP SOC RESP ENV MA, V20, P275, DOI 10.1002/csr.1290  
Makridou G, 2016, ENERGI POLICY, V88, P573, DOI 10.1016/j.enpol.2015.06.042  
May G, 2015, APPL ENERG, V149, P46, DOI 10.1016/j.apenergy.2015.03.065  
Meath C, 2016, J CLEAN PROD, V112, P3597, DOI 10.1016/j.jclepro.2015.08.085  
O'Driscoll E, 2013, J CLEAN PROD, V41, P53, DOI 10.1016/j.jclepro.2012.09.046  
Odyssee-Mure, 2015, EN EFF TRENDS POL IN  
Oggioni G, 2011, ENERGI POLICY, V39, P2842, DOI 10.1016/j.enpol.2011.02.057  
Petek J, 2016, J CLEAN PROD, V112, P2813, DOI 10.1016/j.jclepro.2015.10.046  
Pons M, 2013, J CLEAN PROD, V52, P134, DOI 10.1016/j.jclepro.2013.03.011  
Rudberg M, 2013, APPL ENERG, V104, P487, DOI 10.1016/j.apenergy.2012.11.027  
Salonitis K, 2013, PROC CIRP, V7, P634, DOI 10.1016/j.procir.2013.06.045  
Saygin D, 2011, ENERGY, V36, P6661, DOI 10.1016/j.energy.2011.08.025  
Schulze M, 2016, J CLEAN PROD, V112, P3692, DOI 10.1016/j.jclepro.2015.06.060  
Siggelkow N, 2007, ACAD MANAGE J, V50, P20  
Sueyoshi T, 2012, ENERGI ECON, V34, P634, DOI 10.1016/j.eneco.2011.04.001  
Timilsina GR, 2016, ENERGY, V106, P203, DOI 10.1016/j.energy.2016.03.009  
Trianni A, 2016, APPL ENERG, V162, P1537, DOI 10.1016/j.apenergy.2015.02.078  
Worrell E, 2003, ENERGY, V28, P1081, DOI 10.1016/S0360-5442(03)00091-4  
Yin R. K., 1989, CASE STUDY RES DESIG, V5

NR 49

TC 0

Z9 0

U1 10

U2 23

PU SPRINGER

PI NEW YORK

PA 233 SPRING ST, NEW YORK, NY 10013 USA

SN 1618-954X

EI 1618-9558

J9 CLEAN TECHNOL ENVIR

JI Clean Technol. Environ. Policy

PD MAY

PY 2017

VL 19

IS 4

BP 1031

EP 1046

DI 10.1007/s10098-016-1298-5

PG 16

WC GREEN & SUSTAINABLE SCIENCE & TECHNOLOGY; Engineering, Environmental;  
Environmental Sciences

SC Science & Technology - Other Topics; Engineering; Environmental Sciences  
& Ecology

GA ES0UE

UT WOS:000399241800009

DA 2018-05-03

ER

PT J

AU Moglia, M

- Cook, S  
 McGregor, J  
 AF Moglia, Magnus  
 Cook, Stephen  
 McGregor, James
- TI A review of Agent-Based Modelling of technology diffusion with special reference to residential energy efficiency
- SO SUSTAINABLE CITIES AND SOCIETY
- LA English
- DT Review
- DE Agent-Based Modelling; Diffusion of innovation; HVAC; Lighting; Appliances
- ID MARKET DYNAMICS; CONSUMER; BEHAVIOR; SIMULATION; CONSUMPTION; EMISSIONS; SYSTEMS; PERFORMANCE; ECONOMICS; ATTITUDES
- AB Residential energy efficiency is an important strategy for reducing greenhouse gas emissions. There are many technologies that help improve residential energy efficiency, and in fact, increased energy efficiency has already helped reduce global greenhouse gas emissions significantly in the past. However, with greater innovation, further improvements can be made and improving energy efficiency is an ongoing activity. Policymakers around the world are putting strategies in place to speed up the adoption of energy efficient technologies and practices, but ultimately this process is based on choice by residents themselves. Human decision making and choice however is a very complex issue, and complex computational tools are required in order to analyse and/or predict the impact of various policies. Traditionally, equation-based models such as Bass and Choice models have been used to describe the diffusion of technologies in a population, but certain limitations have been identified. This article explores what these limitations are in the context of energy efficient residential technologies and how an alternative computational and empirical paradigm, Agent-Based Modelling (ABM), can help resolve some of these limitations. As such, this is a review article into how ABM can support analysis of strategies to catalyse greater uptake of energy efficiency in the residential sector. Crown Copyright (C) 2017 Published by Elsevier Ltd. All rights reserved.
- C1 [Moglia, Magnus; Cook, Stephen] CSIRO Land & Water, Ian Wark Bldg B203, Clayton, Vic 3169, Australia. [McGregor, James] CSIRO Energy Technol, Newcastle, NSW 2300, Australia.
- RP Moglia, M (reprint author), CSIRO Land & Water, Ian Wark Bldg B203, Clayton, Vic 3169, Australia.  
 EM magnus.moglia@csiro.au
- RI Moglia, Magnus/C-8575-2011
- OI Moglia, Magnus/0000-0002-8290-610X
- CR AJZEN I, 1991, ORGAN BEHAV HUM DEC, V50, P179, DOI 10.1016/0749-5978(91)90020-T  
 Aman MM, 2013, ENERG POLICY, V52, P482, DOI 10.1016/j.enpol.2012.09.068  
 Ariely D., 2008, PREDICTABLY IRRATION  
 Australian Government, 2013, EN YOUR HOM  
 Bass F. M., 2004, Management Science, V50, P1833, DOI 10.1287/mnsc.1040.0300  
 BASS FM, 1969, MANAGE SCI, V15, P215, DOI 10.1287/mnsc.15.5.215  
 Berry S, 2015, ENERG EFFIC, V8, P963, DOI 10.1007/s12053-015-9336-4  
 Birks D, 2012, CRIMINOLOGY, V50, P221, DOI 10.1111/j.1745-9125.2011.00258.x  
 Boschetti F, 2011, ECOL COMPLEX, V8, P86, DOI 10.1016/j.ecocom.2010.06.001  
 Bouarfa S, 2016, IEEE T EMERG TOP COM, V4, P9, DOI 10.1109/TETC.2015.2439633  
 Brown DG, 2006, ECOLOGY SOC, V11  
 Canessa E, 2006, J INF TECHNOL, V21, P272, DOI 10.1057/palgrave.jit.2000078  
 Carrillo-Hermosilla J, 2006, ECOL ECON, V58, P717, DOI 10.1016/j.ecolecon.2005.09.001  
 Chua KJ, 2013, APPL ENERG, V104, P87, DOI 10.1016/j.apenergy.2012.10.037  
 Di Maria C, 2010, SCOT J POLIT ECON, V57, P48, DOI 10.1111/j.1467-9485.2009.00506.x  
 Drummond P, 2016, BUILD RES INF, V44, P585, DOI 10.1080/09613218.2016.1180075  
 Epstein J. M., 1996, GROWING ARTIFICIAL S  
 Estiri H., 2015, HOUSING POLICY DEBAT  
 Fan H, 2015, ENERG BUILDINGS, V105, P9, DOI 10.1016/j.enbuild.2015.07.030  
 Frederiks ER, 2015, RENEW SUST ENERG REV, V41, P1385, DOI 10.1016/j.rser.2014.09.026  
 GATIGNON H, 1985, J CONSUM RES, V11, P849, DOI 10.1086/209021  
 Geller H, 2006, ENERG POLICY, V34, P556, DOI 10.1016/j.enpol.2005.11.010  
 Gilbert N., 2000, SIMULATION SOCIAL SC



- Goldstone RL, 2005, TRENDS COGN SCI, V9, P424, DOI 10.1016/j.tics.2005.07.009
- Gruber H, 2001, EUR ECON REV, V45, P577, DOI 10.1016/S0014-2921(00)00068-4
- Gupta R, 2012, TECHNOL FORECAST SOC, V79, P709, DOI 10.1016/j.techfore.2011.08.003
- Haase D, 2010, ENVIRON MODELL SOFTW, V25, P1225, DOI 10.1016/j.envsoft.2010.04.009
- Hall N, 2013, SUSTAINABILITY-BASEL, V5, P4561, DOI 10.3390/su5114561
- Heckbert S, 2010, ANN NY ACAD SCI, V1185, P39, DOI 10.1111/j.1749-6632.2009.05286.x
- Hetherington J, 2015, J GREEN BUILD, V10, P127, DOI 10.3992/jgb.10.4.127
- Hicks AL, 2014, INT J LIFE CYCLE ASS, V19, P370, DOI 10.1007/s11367-013-0643-8
- Higgins A, 2012, TECHNOL FORECAST SOC, V79, P1399, DOI 10.1016/j.techfore.2012.04.008
- Jackson J, 2008, T GIS, V12, P475
- Jacobsen GD, 2015, J ENVIRON ECON MANAG, V74, P94, DOI 10.1016/j.jeem.2015.09.004
- Jager W, 2006, ENERG POLICY, V34, P1935, DOI 10.1016/j.enpol.2004.12.022
- Jager W, 2000, ECOL ECON, V35, P357, DOI 10.1016/S0921-8009(00)00220-2
- Jager W, 2012, WORKSH COMPL REAL WO
- Jager W., 2003, LECT NOTES ARTIFICIA
- Jager W, 2014, ADV INTELL SYST, V229, P259, DOI 10.1007/978-3-642-39829-2\_23
- Janssen MA, 2003, ARTIF LIFE, V9, P343, DOI 10.1162/106454603322694807
- Janssen MA, 2002, J EVOL ECON, V12, P283, DOI 10.1007/s00191-002-0120-1
- Janssen MA, 2001, J ECON PSYCHOL, V22, P745, DOI 10.1016/S0167-4870(01)00063-0
- JANSSEN MA, 1999, J ARTIFICIAL SOC SOC, V2
- Janssen M. A., 2001, INT J SUST DEV WORLD, V4, P90
- Johnson L., 2015, MIND SOC, V14, P259
- Kahneman D, 2011, THINKING FAST SLOW
- Khan N, 2011, RENEW SUST ENERG REV, V15, P296, DOI 10.1016/j.rser.2010.07.072
- Kiesling E, 2012, CENT EUR J OPER RES, V20, P183, DOI 10.1007/s10100-011-0210-y
- Knobloch F, 2016, ENVIRON INNOV SOC TR, V21, P39, DOI 10.1016/j.eist.2016.03.002
- Kolmuss A., 2002, ENVIRON EDUC RES, V8, P239, DOI DOI 10.1080/13504620220145401
- Liu JL, 2013, PROCEDIA ENVIRON SCI, V17, P620, DOI 10.1016/j.proenv.2013.02.078
- Macal CM, 2016, J SIMUL, V10, P144, DOI 10.1057/jos.2016.7
- Macal C. M., 2005, P WINT SIM C
- Mao C., 2015, CICTP 2015 EFFICIENT
- Mills B, 2010, ENERG POLICY, V38, P814, DOI 10.1016/j.enpol.2009.10.028
- Moglia M, 2010, ENVIRON MODELL SOFTW, V25, P1528, DOI 10.1016/j.envsoft.2010.05.002
- Natarajan S, 2011, ENERG BUILDINGS, V43, P2602, DOI 10.1016/j.enbuild.2011.05.013
- Newton P, 2013, SUSTAINABILITY-BASEL, V5, P1211, DOI 10.3390/su5031211
- Noonan DS, 2013, ENVIRON BEHAV, V45, P476, DOI 10.1177/0013916511421664
- OECD, 2014, GREEN HOUS BEH REV P
- NSW OEH, 2014, SUST HOUS SURV TRAD
- Rao KU, 2010, RENEW SUST ENERG REV, V14, P1070, DOI 10.1016/j.rser.2009.11.007
- Rogers EM, 1962, DIFFUSION INNOVATION
- Rosenberg BC, 2011, HOME CULT, V8, P5, DOI 10.2752/175174211X12863597046578
- Sanchez-Marono N, 2015, NEURAL PROCESS LETT, V42, P89, DOI 10.1007/s11063-014-9390-5
- Schramm ME, 2010, DECIS SUPPORT SYST, V50, P234, DOI 10.1016/j.dss.2010.08.004
- Smajgl A, 2011, ENVIRON MODELL SOFTW, V26, P837, DOI 10.1016/j.envsoft.2011.02.011
- Sopha B. M., 2015, J ENV PSYCH IN PRESS
- Sorrell S., 2011, 102011 UN IND DEV OR
- State of New South Wales and Office of Environment and Heritage, 2013, NSW EN EFF ACT PLAN
- Swan LG, 2009, RENEW SUST ENERG REV, V13, P1819, DOI 10.1016/j.rser.2008.09.033
- Thompson J, 2015, TRANSPORT RES A-POL, V82, P204, DOI 10.1016/j.tra.2015.09.016
- van Sluisveld MAE, 2016, TECHNOL FORECAST SOC, V102, P309, DOI 10.1016/j.techfore.2015.08.013
- Van Vliet O., 2009, C P 6 C EUR SOC SIM
- Vliet O. V., 2010, TRANSPORT RES D-TR E, V15, P326
- Ward DO, 2011, ENERG POLICY, V39, P1450, DOI 10.1016/j.enpol.2010.12.017
- Wilson C, 2015, ENERGY RES SOC SCI, V7, P12, DOI 10.1016/j.erss.2015.03.002
- Yan J., 2014, INT C APPL EN ICAE20, V61, P2289
- Zhang T, 2011, ENERG BUILDINGS, V43, P2882, DOI 10.1016/j.enbuild.2011.07.007
- Zhang T, 2011, J PROD INNOVAT MANAG, V28, P152, DOI 10.1111/j.1540-5885.2011.00789.x

TC 0  
 Z9 0  
 U1 11  
 U2 14  
 PU ELSEVIER SCIENCE BV  
 PI AMSTERDAM  
 PA PO BOX 211, 1000 AE AMSTERDAM, NETHERLANDS  
 SN 2210-6707  
 EI 2210-6715  
 J9 SUSTAIN CITIES SOC  
 JI Sust. Cities Soc.  
 PD MAY  
 PY 2017  
 VL 31  
 BP 173  
 EP 182  
 DI 10.1016/j.scs.2017.03.006  
 PG 10  
 WC Construction & Building Technology; GREEN & SUSTAINABLE SCIENCE &  
 TECHNOLOGY; Energy & Fuels  
 SC Construction & Building Technology; Science & Technology - Other Topics;  
 Energy & Fuels  
 GA FB7FU  
 UT WOS:000406307300014  
 DA 2018-05-03  
 ER

PT J  
 AU Verkade, N  
 Hoffken, J  
 AF Verkade, Nick  
 Hoffken, Johanna  
 TI Is the Resource Man coming home? Engaging with an energy monitoring  
 platform to foster flexible energy consumption in the Netherlands  
 SO ENERGY RESEARCH & SOCIAL SCIENCE  
 LA English  
 DT Article

DE Smart grids; Flexibility; Resource Man; Energy practices  
 ID SMART GRIDS; SOCIAL NORMS; HOUSEHOLDS; USERS; POWER

AB In this article we empirically study the notion of 'The Resource Man' put forward by Strengers (2014): a motivated and knowledgeable micro-resource manager, who uses domestic smart grid innovations to manage energy demand in a sustainable, affordable and grid-friendly way. To explore this notion, we analyse a case study where energy cooperative members engaged with an ICT-based monitoring platform focussing on three domestic energy-managing activities - energy monitoring, planning and sharing. We find that although this case provided the best prerequisites for the Resource Man to emerge, none of these activities was sustained during the project. This outcome underlines that the Resource Man perspective held by many actors in the energy industry has a narrow understanding of energy consumption and how it can be changed or made more flexible. We suggest that it is easier to understand householders' engagement with energy through the concept of energy practice or "e-practices". E-practices go beyond managing energy with smart devices, and can include being actively involved in an energy collective, generating, trading, storing or discussing energy. We argue that in general, domestic smart grid technology can play a potential but limited role in effecting changes to complex and interlinked daily practices. (C) 2017 The Authors. Published by Elsevier Ltd.

C1 [Verkade, Nick; Hoffken, Johanna] Eindhoven Univ Technol, Sch Ind Engr & Innovat Sci, Room 2-04, POB 513, NL-1600 MB Eindhoven, Netherlands.

RP Verkade, N (reprint author), Eindhoven Univ Technol, Sch Ind Engr & Innovat Sci, Room 2-04, POB 513, NL-1600 MB Eindhoven, Netherlands.

EM n.verkade@tue.nl; j.i.hoffken@tue.nl

FU Netherlands Organisation for Scientific Research NWO; Wageningen University

FX This research forms part of the Emerging Energy Practices in the Smart Grid project, funded by The Netherlands Organisation for Scientific Research NWO, in collaboration with Wageningen University. We would like to express our gratitude to Enexis N.V. and members of the Duurzame Energie Haaren cooperative for facilitating and assisting with this research. Finally, we are also very grateful to the reviewers of earlier drafts for their extremely helpful comments.

- CR Aggarwal-Schifellite M., 2016, HIST SUBTLE SEXISM H  
Allcott H, 2011, J PUBLIC ECON, V95, P1082, DOI 10.1016/j.jpubeco.2011.03.003  
Beelen V., 2016, THESIS  
Bulkeley H, 2016, ENVIRON PLANN A, V48, P7, DOI 10.1177/0308518X15596748  
Burgess J, 2008, ENERG POLICY, V36, P4454, DOI 10.1016/j.enpol.2008.09.039  
D'Oca S, 2014, ENERGY RES SOC SCI, V3, P131, DOI 10.1016/j.erss.2014.07.015  
Darby Sarah, 2006, REV DEFRA LIT METERI, V486, P2006  
DEH, 2014, SAM SLIM MET EN  
Ellsworth-Krebs K, 2015, ENERGY RES SOC SCI, V6, P100, DOI 10.1016/j.erss.2014.12.003  
Faruqui A, 2010, ENERGY, V35, P1598, DOI 10.1016/j.energy.2009.07.042  
Goulden M, 2014, ENERGY RES SOC SCI, V2, P21, DOI 10.1016/j.erss.2014.04.008  
Gram-Hanssen K, 2011, J CONSUM CULT, V11, P61, DOI 10.1177/1469540510391725  
Gram-Hanssen K, 2010, J IND ECOL, V14, P150, DOI 10.1111/j.1530-9290.2009.00194.x  
Hargreaves T, 2013, ENERG POLICY, V52, P126, DOI 10.1016/j.enpol.2012.03.027  
Hargreaves T, 2011, J CONSUM CULT, V11, P79, DOI 10.1177/1469540510390500  
Heuts F, 2013, VALUATION STUDIES, V1, P125, DOI DOI 10.3384/VS.2001-5992.1312125  
MilieuCentraal, EN  
Naus J, 2015, ENERGY RES SOC SCI, V9, P125, DOI 10.1016/j.erss.2015.08.025  
Petkov P., 2011, P 5 INT C COMM TECHN, P21  
Pierce J, 2011, 29TH ANNUAL CHI CONFERENCE ON HUMAN FACTORS IN COMPUTING SYSTEMS, P2405  
Schultz PW, 2007, PSYCHOL SCI, V18, P429, DOI 10.1111/j.1467-9280.2007.01917.x  
Sedee C., 2014, THESIS  
Shove E, 2003, COMFORT CLEANLINESS  
Shove E., 2012, DYNAMICS SOCIAL PRAC  
Shove E, 2010, ENVIRON PLANN A, V42, P1273, DOI 10.1068/a42282  
Strengers Y., 2013, SMART ENERGY TECHNOL  
Strengers Yolande, 2014, INTERACTIONS, V21, P24, DOI [10.1145/2621931, DOI 10.1145/2621931]  
Strengers Y, 2011, 29TH ANNUAL CHI CONFERENCE ON HUMAN FACTORS IN COMPUTING SYSTEMS, P2135  
Strengers Y, 2012, ENERG POLICY, V44, P226, DOI 10.1016/j.enpol.2012.01.046  
Strengers Y, 2010, ENERG POLICY, V38, P7312, DOI 10.1016/j.enpol.2010.08.006  
Torriti J, 2010, ENERGY, V35, P1575, DOI 10.1016/j.energy.2009.05.021  
Verbong GPJ, 2013, ENERG POLICY, V52, P117, DOI 10.1016/j.enpol.2012.05.003  
Walker G, 2014, ENERGY RES SOC SCI, V1, P49, DOI 10.1016/j.erss.2014.03.012  
Warde A, 2005, J CONSUM CULT, V5, P131, DOI DOI 10.1177/1469540505053090

NR 34

TC 0

Z9 0

U1 2

U2 2

PU ELSEVIER SCIENCE BV

PI AMSTERDAM

PA PO BOX 211, 1000 AE AMSTERDAM, NETHERLANDS

SN 2214-6296

EI 2214-6326

J9 ENERGY RES SOC SCI

J1 Energy Res. Soc. Sci.

PD MAY

PY 2017  
 VL 27  
 BP 36  
 EP 44  
 DI 10.1016/j.erss.2017.02.015  
 PG 9  
 WC Environmental Studies  
 SC Environmental Sciences & Ecology  
 GA EZ5PP  
 UT WOS:000404769900005  
 OA gold  
 DA 2018-05-03  
 ER

PT J  
 AU Klemick, H  
   Kopits, E  
   Wolverton, A  
 AF Klemick, Heather  
   Kopits, Elizabeth  
   Wolverton, Ann

TI Potential Barriers to Improving Energy Efficiency in Commercial  
 Buildings: The Case of Supermarket Refrigeration(1)  
 SO JOURNAL OF BENEFIT-COST ANALYSIS

LA English  
 DT Article

DE energy efficiency paradox; market failures; supermarkets; technology  
 investment barriers

ID OFFICE BUILDINGS; PROSPECT-THEORY; ECONOMICS; POLICY; UNCERTAINTY;  
 PARADOX

AB According to engineering analyses, energy-intensive commercial buildings have ample opportunities to reduce energy use while saving money, but many seemingly profitable strategies go unadopted. This study explores potential barriers to energy- and refrigerant-reducing investments in supermarket refrigeration. While supermarkets are large energy users, energy and refrigerant account for a relatively small proportion of expenditures. However, due to the intensely competitive nature of the industry, reducing refrigeration costs could have a sizable impact on supermarkets' bottom lines. Given the scarcity of empirical data in this context, we conducted focus groups and interviews with U.S. supermarket representatives to elicit information about potential barriers to investment and used content analysis to qualitatively evaluate results. Participant statements suggest that the rate at which they adopt specific energy- reducing refrigeration technologies and practices correlates fairly well with estimates of expected payback. Uncertainty and imperfect information about the performance of new technologies, high opportunity costs of capital, and tradeoffs with other valued system attributes such as reliability and customer appeal were the most pervasive potential barriers discussed by participants, although split incentives between firms and contractors or employees also played a role for some firms. Our assessment is that these factors have moderately limited or slowed investments in energy- saving refrigeration technologies for many firms; only in the cases of uncertainty/imperfect information and split incentives between firms and contractors or employees are these barriers potentially indicative of market failures. In addition, in several instances we identify ways in which analysts could improve engineering-based net present value calculations to make them more consistent with actual firm decisions.

C1 [Klemick, Heather; Kopits, Elizabeth; Wolverton, Ann] US EPA, Natl Ctr Environm Econ, MC 1900T, Washington, DC 20460 USA.

RP Klemick, H; Wolverton, A (reprint author), US EPA, Natl Ctr Environm Econ, MC 1900T, Washington, DC 20460 USA.

EM klemick.heather@epa.gov; Wolverton.ann@epa.gov

CR Andrews CJ, 2009, ENERGBUILDINGS, V41, P287, DOI 10.1016/j.enbuild.2008.09.009

Ansar J, 2009, ENERGPOLICY, V37, P1012, DOI 10.1016/j.enpol.2008.10.037

Basker Ernek, 2008, J ECON MANAGE STRAT, V18, P977

Bernheim BD, 2016, J BENEFIT-COST ANAL, V7, P12, DOI 10.1017/bca.2016.5

- Best S., 2005, POLLING AM ENCY PUBL  
 Carbon Trust, 2010, REFR ROADM  
 DeCanio SJ, 1998, REV ECON STAT, V80, P95, DOI 10.1162/003465398557366  
 DeCanio SJ, 1998, ENERG POLICY, V26, P441, DOI 10.1016/S0301-4215(97)00152-3  
 Eichholtz P, 2013, REV ECON STAT, V95, P50, DOI 10.1162/REST\_a\_00291  
 Eichholtz P, 2010, AM ECON REV, V100, P2492, DOI 10.1257/aer.100.5.2492  
 Food Marketing Institute (FMI), 2015, SUP FACTS  
 Fricke BA, 2010, ASHRAE J, V52, P18  
 Gary Michael, 2010, SUPERMARKET NEW 1004  
 Gerarden Todd D., 2015, 90204 NBER  
 Gillingham K, 2009, ANNU REV RESOUR ECON, V1, P597, DOI 10.1146/annurev.resource.102308.124234  
 Greene DL, 2013, ENERG POLICY, V61, P1539, DOI 10.1016/j.enpol.2013.05.050  
 Greene DL, 2011, ENERG ECON, V33, P608, DOI 10.1016/j.eneco.2010.08.009  
 Gul MS, 2012, ENERG POLICY, V45, P752, DOI 10.1016/j.enpol.2012.03.046  
 Helfand G, 2015, J BENEFIT-COST ANAL, V6, P432, DOI 10.1017/bca.2015.13  
 Hsieh HF, 2005, QUAL HEALTH RES, V15, P1277, DOI 10.1177/1049732305276687  
 Intergovernmental Panel on Climate Change (IPCC), 2014, SUMM POL MAK 5 ASS R  
 JAFFE AB, 1994, ENERG POLICY, V22, P804, DOI 10.1016/0301-4215(94)90138-4  
 Jaffe AB, 2005, ECOL ECON, V54, P164, DOI 10.1016/j.ecolecon.2004.12.027  
 King Robert P., 2004, 839 USDA EC RES SERV  
 Klemick Heather, 2015, 1503 NAT CTR ENV EC  
 Klemick Heather, 2013, ENCY ENERGY NATURAL, V1, P74  
 Klemick H, 2015, TRANSPORT RES A-POL, V77, P154, DOI 10.1016/j.tra.2015.04.004  
 Klotz L, 2010, ENERG POLICY, V38, P3557, DOI 10.1016/j.enpol.2010.02.033  
 Latella Richard W., 2006, RETAIL REAL ESTATE S  
 List JA, 2003, Q J ECON, V118, P41, DOI 10.1162/00335530360535144  
 List JA, 2004, ECONOMETRICA, V72, P615, DOI 10.1111/j.1468-0262.2004.00502.x  
 Matsa DA, 2011, Q J ECON, V126, P1539, DOI 10.1093/qje/qjr031  
 MCDONALD R, 1986, Q J ECON, V101, P707, DOI 10.2307/1884175  
 McKinsey & Company, 2009, UNLOCKING ENERGY EFF  
 METCALF GE, 1994, ENERG POLICY, V22, P819, DOI 10.1016/0301-4215(94)90140-6  
 Navigant Consulting, 2009, EN SAV POT RD UNPUB  
 Ochieng EG, 2014, ENERG POLICY, V67, P388, DOI 10.1016/j.enpol.2013.12.002  
 Olson Mancur, 1965, LOGIC COLLECTIVE ACT  
 Papineau Maya, 2013, ENERGY CODES LANDLOR  
 Pellegrini-Masini G, 2011, ENERG POLICY, V39, P5409, DOI 10.1016/j.enpol.2011.05.023  
 Richards TJ, 2006, AM J AGR ECON, V88, P710, DOI 10.1111/j.1467-8276.2006.00890.x  
 Hammitt James K., 2011, J BENEFIT COST ANAL, V2, P1  
 Sallee JM, 2014, J LAW ECON, V57, P781, DOI 10.1086/676964  
 Schleich J, 2008, ENERG ECON, V30, P449, DOI 10.1016/j.eneco.2006.08.004  
 Schleich J, 2009, ECOL ECON, V68, P2150, DOI 10.1016/j.ecolecon.2009.02.008  
 Shogren JF, 2008, REV ENV ECON POLICY, V2, P26, DOI 10.1093/reep/rem027  
 Sullivan R, 2013, ENERG POLICY, V60, P733, DOI 10.1016/j.enpol.2013.05.025  
 TVERSKY A, 1992, J RISK UNCERTAINTY, V5, P297, DOI 10.1007/BF00122574  
 U. S. EPA, REFR LEAK PREV REG M  
 U. S. EPA, 2013, 430R12006 EPA  
 U. S. EPA, 2011, PROF AV US SUP GREEN  
 U. S. EPA, 2008, SEC COLL EN EFF ACC  
 U. S. Environmental Protection Agency (EPA), 2008, FAC TYP SUP GROC STO  
 U. S. Department of Agriculture, 2016, RET TRENDS
- NR 54  
 TC 0  
 Z9 0  
 U1 4  
 U2 4  
 PU CAMBRIDGE UNIV PRESS  
 PI CAMBRIDGE  
 PA EDINBURGH BLDG, SHAFTESBURY RD, CB2 8RU CAMBRIDGE, ENGLAND

SN 2152-2812  
 J9 J BENEFIT-COST ANAL  
 JI J. Benefit-Cost Anal.  
 PD SPR  
 PY 2017  
 VL 8  
 IS 1  
 BP 115  
 EP 145  
 DI 10.1017/bca.2017.4  
 PG 31  
 WC Economics  
 SC Business & Economics  
 GA ER8MV  
 UT WOS:000399074500005  
 DA 2018-05-03  
 ER

PT J

AU Usmani, F

Steele, J

Jeuland, M

AF Usmani, Faraz

Steele, Jason

Jeuland, Marc

TI Can economic incentives enhance adoption and use of a household energy  
 technology ? Evidence from a pilot study in Cambodia

SO ENVIRONMENTAL RESEARCH LETTERS

LA English

DT Article

DE rebates; improved cookstoves; technology adoption; biomass fuels;  
 randomized controlled trial

ID IMPROVED COOKING STOVES; DEVELOPING-COUNTRIES; IMPROVED COOKSTOVES;  
 AIR-POLLUTION; INDIA; BEHAVIOR; CLIMATE; HEALTH; DEMAND; PERFORMANCE

AB While much work has examined approaches to increase uptake of a variety of household environmental, health, and energy technologies, researchers and policymakers alike have struggled to ensure long-term use. Drawing on a pilot-scale experiment conducted in rural Cambodia, this study evaluates whether economic incentives enhance continued use of-and fuel savings from- improved cookstoves (ICS). Capital-cost subsidies that have been traditionally employed to enhance ICS adoption were augmented with rebates linked to stated and objectively measured use in order to investigate impacts on both initial and sustained adoption in the treatment group. Results show that households do respond to these rebates by adopting the intervention ICS at significantly higher rates, and by using it more frequently and for longer periods. Consistent with these stove-use patterns, solid-fuel use and time spent collecting or preparing fuels also decline. However, this effect appears to diminish over time. Thus, while economic inducements may significantly increase adoption and use of new environmental health technologies, corresponding reductions in environmental or livelihood burdens are not guaranteed. Additional research on the design and implementation of incentive-based interventions targeting households directly-such as carbon financing or other forms of results-based financing (RBF) for improved cookstoves- therefore seems warranted prior to wider implementation of such solutions.

C1 [Usmani, Faraz] Duke Univ, Nicholas Sch Environm, Durham, NC 27708 USA.

[Usmani, Faraz; Jeuland, Marc] Duke Univ, Sanford Sch Publ Policy, Durham, NC 27708 USA.

[Steele, Jason] SNV Netherlands Dev Org, Phnom Penh, Cambodia.

[Jeuland, Marc] Duke Univ, Duke Global Hlth Inst, Durham, NC USA.

[Steele, Jason] C Quest Capital, Washington, DC USA.

RP Usmani, F (reprint author), Duke Univ, Nicholas Sch Environm, Durham, NC 27708 USA.; Usmani, F (reprint author), Duke Univ, Sanford Sch Publ Policy, Durham, NC 27708 USA.

EM faraz.usmani@duke.edu; jasonsteele77@gmail.co; marc.jeuland@duke.edu

FU SNV Cambodia; Duke Global Health Institute

FX This study was made possible by the generous support of SNV Cambodia.

Faraz Usmani is also grateful for support from the Duke Global Health Institute. We acknowledge the excellent research assistance provided by Sushmita Samaddar and Hannah Girardeau, and the invaluable contributions of SNV Cambodia research staff (Kanika Pheap and Thary Sok) and our field team (Bunheng Tol, Channak Chun, and Khunny Khuth). We thank two anonymous reviewers for their helpful comments.

- CR Alem Y, 2014, RESOUR ENERGY ECON, V38, P110, DOI 10.1016/j.reseneeco.2014.06.004  
 Ashraf N, 2010, AM ECON REV, V100, P2383, DOI 10.1257/aer.100.5.2383  
 Aung TW, 2016, ENVIRON SCI TECHNOL, V50, P7228, DOI 10.1021/acs.est.5b06208  
 Bensch G, 2015, J HEALTH ECON, V42, P44, DOI 10.1016/j.jhealeco.2015.03.006  
 Bensch G, 2013, LAND ECON, V89, P676, DOI 10.3368/le.89.4.676  
 BESLEY T, 1993, AM ECON REV, V83, P396  
 Bond TC, 2013, J GEOPHYS RES-ATMOS, V118, P5380, DOI 10.1002/jgrd.50171  
 Brooks N, 2016, RESOUR ENERGY ECON, V43, P153, DOI 10.1016/j.reseneeco.2015.12.001  
 Burnett RT, 2014, ENVIRON HEALTH PERSP, V122, P397, DOI 10.1289/ehp.1307049  
 Burney J, 2014, P NATL ACAD SCI USA, V111, P16319, DOI 10.1073/pnas.1317275111  
 Cabraal RA, 2005, ANNU REV ENV RESOUR, V30, P117, DOI 10.1146/annurev.energy.30.050504.144228  
 Cameron AC, 2008, REV ECON STAT, V90, P414, DOI 10.1162/rest.90.3.414  
 Cohen J, 2010, Q J ECON, V125, P1, DOI 10.1162/qjec.2010.125.1.1  
 Davis LW, 2014, AM ECON J-ECON POLIC, V6, P207, DOI 10.1257/pol.6.4.207  
 Esarey J, 2016, CLUSTERSES CALCULATE  
 Freeman OE, 2014, ENVIRON SCI TECHNOL, V48, P14112, DOI 10.1021/es503941u  
 Gettleman Jeffrey, 2015, NY TIMES  
 Gillingham K, 2016, REV ENV ECON POLICY, V10, P68, DOI 10.1093/reep/rev017  
 Gine X, 2009, J DEV ECON, V89, P1, DOI 10.1016/j.jdeveco.2008.09.007  
 Gneezy U, 2011, J ECON PERSPECT, V25, P191, DOI 10.1257/jep.25.4.191  
 Gravelle H, 2010, ECON J, V120, pF129, DOI 10.1111/j.1468-0297.2009.02340.x  
 Greening LA, 2000, ENER POLICY, V28, P389  
 GROSSMAN M, 1972, J POLIT ECON, V80, P223, DOI 10.1086/259880  
 Hanna R, 2016, AM ECON J-ECON POLIC, V8, P80, DOI 10.1257/pol.20140008  
 Jeuland M, 2016, ANAL COSTS BENEFITS  
 Jeuland M, 2015, ANNU REV RESOUR ECON, V7, P81, DOI 10.1146/annurev-resource-100814-125048  
 Jeuland MA, 2012, PLOS ONE, V7, DOI 10.1371/journal.pone.0030338  
 Johnson MA, 2015, ENVIRON HEALTH PERSP, V123, P820, DOI 10.1289/ehp.1408681  
 Krezanoski PJ, 2010, MALARIA J, V9, DOI 10.1186/1475-2875-9-186  
 Kshirsagar MP, 2014, RENEW SUST ENER REV, V30, P580, DOI 10.1016/j.rser.2013.10.039  
 Lewis JJ, 2012, ENVIRON HEALTH PERSP, V120, P637, DOI 10.1289/ehp.1104194  
 Maes WH, 2012, RENEW SUST ENER REV, V16, P4204, DOI 10.1016/j.rser.2012.03.031  
 Masera OR, 2000, WORLD DEV, V28, P2083, DOI 10.1016/S0305-750X(00)00076-0  
 Menon S, 2002, SCIENCE, V297, P2250, DOI 10.1126/science.1075159  
 Miller G, 2015, MARKET SCI, V34, P480, DOI 10.1287/mksc.2014.0845  
 Mobarak AM, 2012, P NATL ACAD SCI USA, V109, P10815, DOI 10.1073/pnas.1115571109  
 Nepal M, 2011, ENVIRON DEV ECON, V16, P1, DOI 10.1017/S1355770X10000409  
 Oxman Andrew D, 2009, J Evid Based Med, V2, P70, DOI 10.1111/j.1756-5391.2009.01020.x  
 Pattanayak SK, 2009, ANNU REV RESOUR ECON, V1, P183, DOI 10.1146/annurev.resource.050708.144053  
 Pattanayak SK, 2009, B WORLD HEALTH ORGAN, V87, P580, DOI 10.2471/BLT.08.057422  
 Piedrahita R, 2016, ENERGY SUSTAIN DEV, V34, P67, DOI 10.1016/j.esd.2016.07.007  
 Ruiz-Mercado I, 2015, ECOHEALTH, V12, P42, DOI 10.1007/s10393-015-1009-4  
 Ruiz-Mercado I, 2011, ENER POLICY, V39, P7557, DOI 10.1016/j.enpol.2011.03.028  
 Ryan SE, 2014, ENERGY RES SOC SCI, V1, P96, DOI 10.1016/j.erss.2014.02.008  
 Silk BJ, 2012, BMC PUBLIC HEALTH, V12, DOI 10.1186/1471-2458-12-359  
 SNV, 2016, ANN REP 2015 APP, P31  
 Srivastava AK, 2012, ENVIRON RES LETT, V7, DOI 10.1088/1748-9326/7/1/014002  
 Tarozzi A, 2014, AM ECON REV, V104, P1909, DOI 10.1257/aer.104.7.1909  
 Thomas EA, 2013, ENVIRON SCI TECHNOL, V47, P13602, DOI 10.1021/es403412x  
 World Health Organization, 2016, BURN OPP CLEAN HOUS  
 Wilson D L, 2015, TECHNOLOGIES DEV WHA, P211

NR 51

TC 0

Z9 0

U1 0

U2 1

PU IOP PUBLISHING LTD

PI BRISTOL

PA TEMPLE CIRCUS, TEMPLE WAY, BRISTOL BS1 6BE, ENGLAND

SN 1748-9326

J9 ENVIRON RES LETT

J1 Environ. Res. Lett.

PD MAR

PY 2017

VL 12

IS 3

AR 035009

DI 10.1088/1748-9326/aa6008

PG 11

WC Environmental Sciences; Meteorology & Atmospheric Sciences

SC Environmental Sciences & Ecology; Meteorology & Atmospheric Sciences

GA FK9AE

UT WOS:000413802000002

OA gold

DA 2018-05-03

ER

PT J

AU Cao, JJ

Choi, CH

Zhao, F

AF Cao, Jinjian

Choi, Chul Hun

Zhao, Fu

TI Agent-based modeling of the adoption of high-efficiency lighting in the residential sector

SO SUSTAINABLE ENERGY TECHNOLOGIES AND ASSESSMENTS

LA English

DT Article

DE Agent based modeling; High efficiency lighting; Simple decision heuristics

AB Due to the wide use of incandescent lighting, residential sector has much lower energy efficiency comparing to commercial sector. However, adoption of compact fluorescent (CFL) and light-emitting diode (LED) technology in residential sector has been slow because of several obstacles such as high price tag, poor public information, and additional cost to achieve favorable lighting features. A deep understanding on consumer's behavior is needed to support policy development in order to speed up the penetration of CFL and LED in the residential sector. Agent-based modeling (ABM) has been used to capture the dynamics of complex socio-technical systems, and represent a suitable tool. Previous work on ABM of consumer adoption of CFL and LED rely heavily on multi-criteria decision making of the agents. Since light bulbs are not a significant purchase for most households, it is highly possible that customers will not go through complex decision making mechanics. This research establishes an ABM of residential lighting purchase and usage within a hypothetical community and tries to illustrate possible adoption paths under different scenarios. Agents are divided into three groups with different simple decision heuristics when making purchase. Energy consumption and greenhouse gas (GHG) emission from each scenario are calculated and compared. Results of the simulation show that incandescent lamps will eventually fade out of the market even with no policy implemented. After 25 years, annual energy consumption can be reduced by roughly 30% compared to Year 2010. Under best case where incandescent bulbs are banned, the energy consumption reduction can be up to 70%. Among scenarios, incandescent ban and energy saving campaign yield best energy consumption and GHG emission reduction results.



LED technology advancement can improve market penetration of LED lighting but has little effect on incandescent fade out. It is also shown that lighting technology retrofitting can achieve higher reduction on electricity consumption and GHG emission than electricity grid improvement. (C) 2016 Elsevier Ltd. All rights reserved.

C1 [Cao, Jinjian; Choi, Chul Hun] Purdue Univ, Sch Ind Engr, W Lafayette, IN 47907 USA.

[Zhao, Fu] Purdue Univ, Div Environm & Ecol Engr, Sch Mech Engr, W Lafayette, IN 47907 USA.

RP Zhao, F (reprint author), Purdue Univ, Div Environm & Ecol Engr, Sch Mech Engr, W Lafayette, IN 47907 USA.

EM cao164@purdue.edu; choi270@purdue.edu; fzhao@purdue.edu

FU National Science Foundation [1336534]

FX This material is based upon work supported by the National Science Foundation under Grant No. 1336534. Any opinions, findings, and conclusions or recommendations expressed in this material are those of the authors and do not necessarily reflect the views of the National Science Foundation.

CR Bergesen JD, 2015, J IND ECOL

Blok K, 2012, NAT CLIM CHANGE, V2, P471, DOI 10.1038/nclimate1602

Chappin E JL, 2013, ENVIRON INNOV SOC TR, V7, P16, DOI 10.1016/j.eist.2012.11.005

Cullen T., 2015, 1 QUARTER PROVES BE

DNV GL, 2015, 2014 2015 NW RES LIG

DNV KEMA, 2012, RES LIGHT END US CON

Franz M, 2015, INT SPR SEM ELECT TE, P396, DOI 10.1109/ISSE.2015.7248029

Gilbert GN, 2008, AGENT BASED MODELS N

Hicks AL, 2015, J IND ECOL, V19, P285, DOI 10.1111/jiec.12281

HOYER WD, 1984, J CONSUM RES, V11, P822, DOI 10.1086/209017

Johnson B. J., 2014, INN SMART GRID TECHN, P1

Kelton WD, 2000, SIMULATION MODELING

Navigant, 2012, LIF CYCL ASS EN ENV

Navigant, 2012, 2010 US LIGHT MARK C

Navigant, 2012, EN SAV POT SOL STAT

North M.J., 2013, COMPLEX ADAPT SYST M, V1, P1, DOI DOI 10.1186/2194-3206-1-3

OLSHAVSKY RW, 1979, J CONSUM RES, V6, P93, DOI 10.1086/208753

Richardson I, 2009, ENERG BUILDINGS, V41, P781, DOI 10.1016/j.enbuild.2009.02.010

Shahzada K, 2015, CHEM ENG, P45

US Department of State, 2014, 2014 US CLIM ACT REP

U. S. Energy Information Administration, 2016, DOE EIA0348

US Energy Information Administration, 2014, ANN EN OUTL 2014

U. S. Environmental Protection Agency, 2015, EM GEN RES INT DAT

Watts D.J., 1999, SMALL WORLDS DYNAMIC

Xiang Xiaorong, 2005, AG DIR SIM C, P47

NR 25

TC 0

Z9 0

U1 3

U2 6

PU ELSEVIER SCIENCE BV

PI AMSTERDAM

PA PO BOX 211, 1000 AE AMSTERDAM, NETHERLANDS

SN 2213-1388

EI 2213-1396

J9 SUSTAIN ENERGY TECHN

JI Sustain. Energy Technol. Assess.

PD FEB

PY 2017

VL 19

BP 70

EP 78

DI 10.1016/j.seta.2016.12.003

PG 9

WC Energy & Fuels

SC Energy & Fuels

GA EP2CW

UT WOS:000397191600007

DA 2018-05-03

ER

PT J

AU Voegelé, S

Hansen, P

Poganietz, WR

Prehofer, S

Weimer-Jehle, W

AF Voegelé, Stefan

Hansen, Patrick

Poganietz, Witold-Roger

Prehofer, Sigrid

Weimer-Jehle, Wolfgang

TI Building scenarios for energy consumption of private households in Germany using a multi-level cross-impact balance approach

SO ENERGY

LA English

DT Article

DE Cross-impact balance; Energy demand of private households;

Socio-technical scenario construction; Energy bottom-up model

ID RESIDENTIAL SECTOR; CLIMATE-CHANGE; DEMAND; CONSTRUCTION; EMISSIONS; CONTEXT; MODELS

AB A major goal concerning the energy transition in Germany is the reduction of energy usage. In Germany in 2011, private households consumed 2194 PJ and have been identified as a sector with high energy reduction potential. The energy demand of this sector is dependent on many linked quantitative and qualitative factors (e.g., number of persons and demographic structure, expenditures, cost of energy saving measures, willingness to invest, and level of coordination in international climate policy). In our study, we introduce a multilevel cross-impact approach which allows for the definition and quantification of data for scenario analysis while taking the interdependences between different factors on the global, national and sectoral levels into account. This approach makes it possible to overcome limitations that conventional energy models are usually confronted with. By applying a trend analysis in combination with information on the interdependence of relevant factors on the global and national levels, consistent sectoral views of the private household's future are created. (C) 2016 Elsevier Ltd. All rights reserved.

C1 [Voegelé, Stefan; Hansen, Patrick] Forschungszentrum Jülich, Inst Energy & Climate Res Syst Anal & Technol Eva, D-52425 Jülich, Germany.

[Poganietz, Witold-Roger] Karlsruhe Inst Technol, Inst Technol Assessment & Syst Anal ITAS, D-76021 Karlsruhe, Germany.

[Prehofer, Sigrid; Weimer-Jehle, Wolfgang] Univ Stuttgart, Stuttgart Res Ctr Interdisciplinary Risk & Innova, D-70174 Stuttgart, Germany.

RP Voegelé, S (reprint author), Forschungszentrum Jülich, Inst Energy & Climate Res Syst Anal & Technol Eva, D-52425 Jülich, Germany.

EM s.voegelé@fz-juelich.de; p.hansen@fz-juelich.de; poganietz@kit.edu;

sigrid.prehofer@ziri.us.uni-stuttgart.de;

wolfgang.weimer-jehle@ziri.us.uni-stuttgart.de

OI Voegelé, Stefan/0000-0002-5804-0203

CR Alcamo J., 2008, DEV INTEGRATED ENV A, P123

Asan U, 2004, OMEGA-INT J MANAGE S, V32, P443, DOI 10.1016/j.omega.2004.02.006

BMWi, 2010, EN CONC ENV SUND REL

BMWi, 2015, EN DAT COMPL ED

BMWi, 2011, ROADM EN FUT REL AFF

Cho KT, 2004, EUR J OPER RES, V156, P420, DOI [10.1016/S0377-2217(03)00907-4, 10.1016/S0377-2217(02)00907-4]

Dirks JA, 2015, ENERGY, V79, P20, DOI 10.1016/j.energy.2014.08.081  
DLR, 2012, LONG TERM SCEN STRAT  
European Commission, 2011, ROADM MOV COMP LOW C  
FFE, 2009, EN FUT 2050  
Fuchs G., 2008, DISCUSSION PAPERS SE  
GORDON TJ, 1968, FUTURES, V1, P100, DOI 10.1016/S0016-3287(68)80003-5  
Gouveia JP, 2012, ENERGY, V47, P430, DOI 10.1016/j.energy.2012.09.042  
Hansen P, 2014, POLITIKSZENARIEN KLI  
IER RWI ZEW, 2010, DEV EN MARK 2030 EN  
Isaac M, 2009, ENER POLICY, V37, P507, DOI 10.1016/j.enpol.2008.09.051  
Jenssen T, 2012, GAIA, V21, P290, DOI 10.14512/gaia.21.4.14  
KANE J, 1972, TECHNOL FORECAST SOC, V4, P129, DOI 10.1016/0040-1625(72)90010-8  
Kavgic M, 2010, BUILD ENVIRON, V45, P1683, DOI 10.1016/j.buildenv.2010.01.021  
Krause H, 2011, G50409TP2 DVGW  
Krupa J, 2013, ENERGY STRATEG REV, V1, P286, DOI 10.1016/j.esr.2013.02.004  
Kuckshinrichs W, 2010, ENER POLICY, V38, P4317, DOI 10.1016/j.enpol.2010.03.060  
Li FGN, 2015, TECHNOL FORECAST SOC, V100, P290, DOI 10.1016/j.techfore.2015.07.017  
Makridakis S, 2009, INT J FORECASTING, V25, P794, DOI 10.1016/j.ijforecast.2009.05.012  
Matthes FC, 2009, POLICY SCENARIOS CLI  
Meylan G, 2013, RESOUR CONSERV RECY, V74, P8, DOI 10.1016/j.resconrec.2013.02.011  
Najmi A, 2016, INT J SUSTAIN ENERGY, V35, P645, DOI 10.1080/14786451.2014.930466  
Nassen J, 2014, ENERGY, V66, P98, DOI 10.1016/j.energy.2014.01.019  
Oko-Institut, 2009, CLIM CHANG 2050 TARG  
Oko-Institut Fraunhofer-ISI, 2015, CLIM PROT SCEN 2050  
Prognos EWI, 2011, EN SCEN 2011  
Renn Ortwin, 2009, International Journal of Global Environmental Issues, V9, P291, DOI 10.1504/IJGENVI.2009.027260  
Saner D, 2011, RESOUR CONSERV RECY, V57, P67, DOI 10.1016/j.resconrec.2011.09.002  
Schweizer VJ, 2014, CLIMATIC CHANGE, V122, P431, DOI 10.1007/s10584-013-0908-z  
Schweizer VJ, 2012, ENVIRON RES LETT, V7, DOI 10.1088/1748-9326/7/4/044011  
Shell BDH, 2013, HOM HEAT STUD CLIM P  
Vogele S, ANAL ENERGY CONSUMPT  
Weimer-Jehle W, 2006, TECHNOL FORECAST SOC, V73, P334, DOI 10.1016/j.techfore.2005.06.005  
Weimer-Jehle W, 2016, ENERGY, V111, P956, DOI 10.1016/j.energy.2016.05.073  
Weimer-Jehle W, 2012, J PUBLIC HEALTH-HEID, V20, P111, DOI 10.1007/s10389-011-0473-8  
Weimer-Jehle W., 2013, SCENARIOWIZARD 4 1 C  
Weimer-Jehle W, 2011, CONSISTENT FRAMEWORK

NR 42  
TC 0  
Z9 0  
U1 4  
U2 10  
PU PERGAMON-ELSEVIER SCIENCE LTD  
PI OXFORD  
PA THE BOULEVARD, LANGFORD LANE, KIDLINGTON, OXFORD OX5 1GB, ENGLAND  
SN 0360-5442  
EI 1873-6785  
J9 ENERGY  
JI Energy  
PD FEB 1  
PY 2017  
VL 120  
BP 937  
EP 946  
DI 10.1016/j.energy.2016.12.001  
PG 10  
WC Thermodynamics; Energy & Fuels  
SC Thermodynamics; Energy & Fuels

GA EN4BQ  
 UT WOS:000395953000081  
 DA 2018-05-03  
 ER

PT J

AU Volland, B

AF Volland, Benjamin

TI The role of risk and trust attitudes in explaining residential energy demand: Evidence from the United Kingdom

SO ECOLOGICAL ECONOMICS

LA English

DT Article

DE Risk attitudes; Trust; Energy expenditures; BHPS; UK households

ID SPACE HEATING EXPENDITURES; SOCIAL DILEMMA ANALYSIS; ENVIRONMENTAL ATTITUDES; EFFICIENT TECHNOLOGIES; ECONOMETRIC-ANALYSIS; CONSUMPTION; DETERMINANTS; PREFERENCES; AVERSION; BEHAVIOR

AB Recent research into the determinants of household energy consumption has aimed to incorporate findings from economics, sociology and psychology in order to obtain a more comprehensive understanding of the factors determining energy demand. The current paper contributes to this nascent stream of literature by studying the relationship between risk attitudes, trust propensity and energy consumption at the household level. Drawing on the British Household Panel Survey, a well-known data set in the context of energy studies, I show that trust is negatively correlated with household energy demand, while higher risk tolerance leads to increases in residential energy use. Potential explanations for these findings are investigated, suggesting that risk preferences may be related with overall appliance stock and the size of the rebound effect. (C) 2016 Elsevier B.V. All rights reserved.

C1 [Volland, Benjamin] Univ Neuchatel, Inst Rech Econ, A-L Breguet 2, CH-2000 Neuchatel, Switzerland.

RP Volland, B (reprint author), Univ Neuchatel, Inst Rech Econ, A-L Breguet 2, CH-2000 Neuchatel, Switzerland.

EM benjamin.volland@unine.ch

OI Volland, Benjamin/0000-0001-5815-0827

CR Abrahamse W, 2009, J ECON PSYCHOL, V30, P711, DOI 10.1016/j.joep.2009.05.006

Alcott B, 2005, ECOL ECON, V54, P9, DOI 10.1016/j.ecolecon.2005.03.020

Ashraf N, 2006, EXP ECON, V9, P193, DOI 10.1007/s10683-006-9122-4

Bacon PM, 2014, THEOR DECIS, V77, P389, DOI 10.1007/s11238-014-9448-x

Baker Erin, 2012, ENERGY J, V33

Becker A, 2012, ANNU REV ECON, V4, P453, DOI 10.1146/annurev-economics-080511-110922

BECKER LJ, 1981, ENVIRON BEHAV, V13, P590, DOI 10.1177/0013916581135004

Binswanger M, 2001, ECOL ECON, V36, P119, DOI 10.1016/S0921-8009(00)00214-7

Bohnet I, 2004, J ECON BEHAV ORGAN, V55, P467, DOI 10.1016/j.jebo.2003.11.004

Bohnet I, 2008, AM ECON REV, V98, P294, DOI 10.1257/aer.98.1.294

Borenstein S., 2014, ENERGY J, V36

Brandon G, 1999, J ENVIRON PSYCHOL, V19, P75, DOI 10.1006/jevp.1998.0105

Cameron AC, 2015, J HUM RESOUR, V50, P317

Carattini S, 2015, ENVIRON POLICY GOV, V25, P243, DOI 10.1002/eet.1685

Carroll CD, 1997, NBER MACROECON ANNU, V12, P165, DOI 10.2307/3585228

Chitnis M, 2014, ECOL ECON, V106, P12, DOI 10.1016/j.ecolecon.2014.07.003

Christie L, 2011, BUILD RES INF, V39, P450, DOI 10.1080/09613218.2011.592485

Clark CF, 2003, J ENVIRON PSYCHOL, V23, P237, DOI 10.1016/S0272-4944(03)00105-6

Colquitt JA, 2007, J APPL PSYCHOL, V92, P909, DOI 10.1037/0021-9010.92.4.909

Darnton A., 2008, REFERENCE REPORT OVE

DECC, 2014, EN CONS UK DOM DAT T

DECC, 2013, EN EFF STRAT 2013 UP

DECC, 2011, EN TRENDS JUN 2011

DECC, 2014, GREENH GAS EM UK DOM

Dietz T, 2009, P NATL ACAD SCI USA, V106, P18452, DOI 10.1073/pnas.0908738106

Dohmen T, 2008, ECON INQ, V46, P84, DOI 10.1111/j.1465-7295.2007.00082.x

Dohmen T, 2012, REV ECON STUD, V79, P645, DOI 10.1093/restud/rdr027

- Dohmen T, 2011, J EUR ECON ASSOC, V9, P522, DOI 10.1111/j.1542-4774.2011.01015.x
- DUBIN JA, 1984, ECONOMETRICA, V52, P345, DOI 10.2307/1911493
- Dunn W. E., 1998, UNEMPLOYMENT RISK PR
- Farsi M, 2010, ENER POLICY, V38, P3078, DOI 10.1016/j.enpol.2010.01.048
- Fehr E, 2009, J EUR ECON ASSOC, V7, P235, DOI 10.1162/JEEA.2009.7.2-3.235
- Ferrer-i-Carbonell A, 2004, ENVIRON RESOUR ECON, V27, P367, DOI 10.1023/B:EARE.0000018514.98541.8b
- Fukuyama Francis, 1995, TRUST SOCIAL VIRTUES
- Gachter S, 2004, J ECON BEHAV ORGAN, V55, P505, DOI 10.1016/j.jebo.2003.11.006
- Gatersleben B, 2002, ENVIRON BEHAV, V34, P335, DOI 10.1177/0013916502034003004
- Gifford R, 2014, ANNU REV PSYCHOL, V65, P541, DOI 10.1146/annurev-psych-010213-115048
- Glaeser EL, 2000, Q J ECON, V115, P811, DOI 10.1162/003355300554926
- Gronhoj A., 2007, J CONSUM BEHAV, V6, P218, DOI DOI 10.1002/CB.2L6
- Gronhoj A., 2006, J CONSUM BEHAV, V5, P491, DOI DOI 10.1002/CB.198
- Gupta S, 2009, J CONSUM MARK, V26, P376, DOI 10.1108/07363760910988201
- Harrison GW, 2008, RES EXP ECON, V12, P41, DOI 10.1016/S0193-2306(08)00003-3
- HASSETT KA, 1993, ENER POLICY, V21, P710, DOI 10.1016/0301-4215(93)90294-P
- Holt CA, 2002, AM ECON REV, V92, P1644, DOI 10.1257/000282802762024700
- Irwin K, 2013, SOCIOL QUART, V54, P424, DOI 10.1111/tsq.12029
- Kotchen MJ, 2007, J ENVIRON ECON MANAG, V53, P1, DOI 10.1016/j.jeem.2006.06.003
- Lange I, 2014, ECOL ECON, V107, P76, DOI 10.1016/j.ecolecon.2014.07.021
- Leth-Petersen S, 2001, ENER ECON, V23, P387, DOI 10.1016/S0140-9883(00)00078-5
- Meier H, 2010, ENER ECON, V32, P949, DOI 10.1016/j.eneco.2009.11.008
- Miller AS, 2003, SOC PSYCHOL QUART, V66, P62, DOI 10.2307/3090141
- Nesbakken R, 1999, ENER ECON, V21, P493, DOI 10.1016/S0140-9883(99)00022-5
- Nesbakken R, 2001, SCAND J ECON, V103, P165, DOI 10.1111/1467-9442.00236
- OECD, 2002, HOUS EN WAT CONS WAS
- ONS, 2009, FAM SPEND REP 2008 L
- Ostrom E., 2003, FDN SOCIAL CAPITAL
- Ostrom E., 2009, POLICY REWORKING P
- Pretty J, 2001, WORLD DEV, V29, P209, DOI 10.1016/S0305-750X(00)00098-X
- Qiu YM, 2014, ECOL ECON, V107, P216, DOI 10.1016/j.ecolecon.2014.09.002
- Rehdanz K, 2007, ENER ECON, V29, P167, DOI 10.1016/j.eneco.2006.04.002
- ROSENBERG M, 1956, AM SOCIOL REV, V21, P690, DOI 10.2307/2088419
- Sapci O, 2014, J BEHAV EXP ECON, V52, P29, DOI 10.1016/j.socec.2014.06.001
- Schroder C, 2015, OXFORD ECON PAP, V67, P760, DOI 10.1093/oeq/gpv033
- Schuler A, 2000, ENER POLICY, V28, P877, DOI 10.1016/S0301-4215(00)00074-4
- SELIGMAN C, 1979, J APPL SOC PSYCHOL, V9, P70, DOI 10.1111/j.1559-1816.1979.tb00795.x
- SHAMA A, 1983, ENER POLICY, V11, P148, DOI 10.1016/0301-4215(83)90027-7
- Shaw KL, 1996, J LABOR ECON, V14, P626, DOI 10.1086/209825
- Sonderskov KM, 2011, RATION SOC, V23, P51, DOI 10.1177/1043463110396058
- Stern Paul C., 2014, ENERGY RES SOC SCI, V1, P41, DOI [10.1016/j.erss.2014.03.003, DOI 10.1016/J.ERSS.2014.03.003]
- Taylor M. F., 2010, BRIT HOUS PAN SURV U
- Torgler B, 2009, BE J ECON ANAL POLI, V9
- van den Bergh JCM, 2008, ECOL ECON, V66, P559, DOI 10.1016/j.ecolecon.2008.04.007
- Van Lange PAM, 1998, J APPL SOC PSYCHOL, V28, P796, DOI 10.1111/j.1559-1816.1998.tb01732.x
- Van Vugt M., 1999, PERSONALITY SOCIAL P, V25, P735, DOI DOI 10.1177/0146167299025006008
- Wilson C, 2007, ANNU REV ENV RESOUR, V32, P169, DOI 10.1146/annurev.energy.32.053006.141137
- [Anonymous], 2014, TRUST ENERGY SAVING

NR 75

TC 0

Z9 0

U1 1

U2 20

PU ELSEVIER SCIENCE BV

PI AMSTERDAM

PA PO BOX 211, 1000 AE AMSTERDAM, NETHERLANDS

SN 0921-8009  
 EI 1873-6106  
 J9 ECOL ECON  
 JI Ecol. Econ.  
 PD FEB  
 PY 2017  
 VL 132  
 BP 14  
 EP 30  
 DI 10.1016/j.ecolecon.2016.10.002  
 PG 17  
 WC Ecology; Economics; Environmental Sciences; Environmental Studies  
 SC Environmental Sciences & Ecology; Business & Economics  
 GA EG1WR  
 UT WOS:000390825200002  
 DA 2018-05-03  
 ER

PT S  
 AU Abidin, NI  
     Zakaria, R  
     Aminuddin, E  
     Hamid, ARA  
     Munikanan, V  
     Sahamir, SR  
     Shamsuddin, SM  
 AF Abidin, Nur IzieAadiana  
     Zakaria, Rozana  
     Aminuddin, Eeydzah  
     Hamid, Abdul Rahim Abdul  
     Munikanan, Vikneswaran  
     Sahamir, Shaza Rina  
     Shamsuddin, Siti Mazzuana  
 BE Park, JW  
     Lie, HA  
     Hardjasaputra, H  
     Thayaalan, P  
 TI Factor Analysis on Criteria Affecting Lean Retrofit for Energy Efficient  
    Initiatives in Higher Learning Institution Buildings  
 SO 6TH INTERNATIONAL CONFERENCE OF EURO ASIA CIVIL ENGINEERING FORUM (EACEF  
    2017)  
 SE MATEC Web of Conferences  
 LA English  
 DT Proceedings Paper  
 CT 6th International Conference of Euro-Asia-Civil-Engineering-Forum  
    (EACEF)  
 CY AUG 22-25, 2017  
 CL Hanyang Univ, Seoul, SOUTH KOREA  
 SP Euro Asia Civil Engn Forum, Korean Soc Soil & Groundwater Engrn, Indonesian Univ Consortium  
 HO Hanyang Univ  
 ID RESIDENTIAL BUILDINGS; EXISTING BUILDINGS; UNIVERSITY CAMPUS;  
    CONSUMPTION; DESIGN; SUSTAINABILITY; CONSERVATION; COST  
 AB The expansion of Higher Learning Institution (HLI) is a global concerns on energy demand due to  
    campus act like a small city. Intensive mode of operation of a building is correlated to the energy  
    utilization. Improvement in the current energy efficiency is crucial effort to minimize the environmental  
    effect through minimisation of energy in operation by retrofitting and upgrade the existing building  
    system or components to be more efficient. Basically, there are three recommended steps for the  
    improvement known as lean initiatives, green technology and clean energy in response to becoming zero

energy solutions for building. The deliberation of this paper is aimed to highlight the criteria affecting in retrofitting of existing building in HLI with lean initiatives in order to achieve energy efficiency and reduction of energy consumption. Attention is devoted to reviewing the lean energy retrofitting initiatives criteria for daylighting (side lighting), daylighting (skylight) and glazing. The questionnaire survey was employed and distributed to the architects who has an expertise in green building design. Factor analysis was adopted as a method of analysis by using Principal Component with Varimax Rotation. The result is presented through summarizing the sub-criteria according to its importance with a factor loading 0.50 and above. The result found that majority of the criteria developed achieved the significant factor loading value and in accordance with the protocol of analysis. In conclusion the results from analysis of this paper assists the stakeholders in assessing the significant criteria based on the desired lean energy retrofitting initiatives and also provides a huge contribution for future planning improvement in existing buildings to become an energy efficient building.

C1 [Abidin, Nur IzieAdiana; Zakaria, Rozana; Aminuddin, Eeydzah; Hamid, Abdul Rahim Abdul] Univ Teknol Malaysia, Fac Civil Engr, Johor Baharu, Malaysia.

[Munikanan, Vikneswaran] Univ Pertahanan Malaysia, Fac Engr, Kuala Lumpur, Malaysia.

[Sahamir, Shaza Rina; Shamsuddin, Siti Mazzuana] Univ Teknol Mara, Fac Architecture Planning & Surveying, Shah Alam, Selangor, Malaysia.

RP Abidin, NI (reprint author), Univ Teknol Malaysia, Fac Civil Engr, Johor Baharu, Malaysia.

EM rozana@utm.my

OI Abdul Hamid, Abdul Rahim/0000-0001-5935-8873

CR Alshuwaikhat HM, 2008, J CLEAN PROD, V16, P1777, DOI 10.1016/j.jclepro.2007.12.002

Appleby P., 2013, SUSTAINABLE RETROFIT

Ayala E., 2011, ENERGY EFFICIENT MET, P235

Calcagni B, 2004, SOL ENERGY, V76, P669, DOI 10.1016/j.solener.2004.01.009

Chung MH, 2014, ENER G BUILDINGS, V78, P176, DOI 10.1016/j.enbuild.2014.04.018

Citterio M., 2003, RETROFIT U BUILDING

College of Desert, 2011, COLL DES CAMP WID LI

Danby D., 2011, PASSIVE DESIGN STRAT

Di Stefano J, 2000, ENERGY, V25, P823, DOI 10.1016/S0360-5442(00)00015-3

Eriksson R, 2015, PROC ECON FINANC, V21, P329, DOI 10.1016/S2212-5671(15)00184-7

Escobedo A, 2014, ENERGY SUSTAIN DEV, V18, P49, DOI 10.1016/j.esd.2013.10.005

Syed Fadzil S. F., 2012, ENERGY BUILDING CONT

Gewelber M., 2007, OPPORTUNITIES ACHIEV

Gong XZ, 2012, BUILD ENVIRON, V58, P46, DOI 10.1016/j.buildenv.2012.06.014

Goudarzi H, 2017, RENEW SUST ENER G REV, V68, P432, DOI 10.1016/j.rser.2016.10.002

Hassan F., 2014, INT CONSTRUCTION WEE

Jomoah I. M., 2013, INT C POW ENG EN EL, P13

Kolokotsa D, 2016, ENER G BUILDINGS, V123, P119, DOI 10.1016/j.enbuild.2016.04.038

Lu J., 2010, P 2 ACM WORKSH EMB S, V10, P73

Lyons P., 2013, YOUR HOME AUSTR GUID

Ma SL, 2012, APPL MECH MATER, V170-173, P2670, DOI 10.4028/www.scientific.net/AMM.170-173.2670

Mahlia TMI, 2011, RENEW SUST ENER G REV, V15, P1125, DOI 10.1016/j.rser.2010.10.014

Manglani P., 2004, MODULAR SKYLIGHT SYS, P214

National Grid, 2003, MAN EN COSTS COLL U

Pallant J., 2014, SPSS SURVIVAL MANUAL

Puvanasvaran A. P., 2012, INT C DES CONC ENG U

Ruparathna R, 2016, RENEW SUST ENER G REV, V53, P1032, DOI 10.1016/j.rser.2015.09.084

Saidur R, 2011, ENERGY, V36, P5233, DOI 10.1016/j.energy.2011.06.027

Selkowitz S., 2004, INT S DAYL BUILD, V10

Tan B, 2016, COMPUT OPER RES, V66, P258, DOI 10.1016/j.cor.2015.01.013

Tang F. E., 2012, INT J ENV EARTH SCI, V8, P99

Tymkow P., 2008, BUILDING SERVICES DE

UC Berkeleys, 2012, UC BERK U HALL WIR H

Williams B., 2012, AUSTRALASIAN J PARAM, V8

Wu MH, 2016, ENERGY SUSTAIN DEV, V31, P118, DOI 10.1016/j.esd.2015.12.003

Chee Yue J. L., 2014, OTTV CALCULATION ENE

Zain-Ahmed A, 2002, ENER G CONVERS MANAGE, V43, P1725, DOI 10.1016/S0196-8904(01)00007-3

Zhou X, 2013, ENER G BUILDINGS, V66, P112, DOI 10.1016/j.enbuild.2013.07.055

NR 38  
TC 0  
Z9 0  
U1 0  
U2 0  
P U E D P SCIENCES  
P I CEDEX A  
P A 17 AVE DU HOGGAR PARC D ACTIVITES COUTABOEUF BP 112, F-91944 CEDEX A,  
FRANCE  
S N 2261-236X  
J 9 MATEC WEB CONF  
P Y 2017  
V L 138  
A R UNSP 02025  
D I 10.1051/mateconf/201713802025  
P G 10  
W C Engineering, Civil; Materials Science, Multidisciplinary  
S C Engineering; Materials Science  
G A B J 6 L H  
U T W O S : 0 0 0 4 2 6 8 1 0 7 0 0 0 4 9  
O A gold  
D A 2018-05-03  
E R

P T J  
A U Asadi, I  
M a h y u d d i n , N  
S h a f i g h , P  
A F Asadi, Iman  
M a h y u d d i n , N o r h a y a t i  
S h a f i g h , P a y a m  
T I A review on indoor environmental quality (IEQ) and energy consumption in  
building based on occupant behavior

S O FACILITIES

L A English

D T Review

D E Thermal comfort; Energy consumption; Indoor air quality; Aural comfort;  
Human behavior; Indoor environmental quality; Visual comfort

I D RESIDENTIAL BUILDINGS; AIR-QUALITY; PERFORMANCE; SIMULATION; OFFICE;  
ACCEPTANCE; MANAGEMENT; COMFORT; MODELS; NOISE

A B Purpose - The purpose of this paper is to review the concept of occupant behavior and its relation with indoor environmental quality (IEQ) and building energy consumption. The behavior is referred to any direct or indirect action, which is selected by an occupant to manage the unpleasant indoor environmental conditions. Thermal comfort, indoor air quality, aural comfort and visual comfort are the key factors of IEQ evaluation. Human behavior significantly interacts with energy consumption in buildings.

Design/methodology/approach - Each IEQ parameter was reviewed separately and the overall IEQ acceptance was considered. In addition, this paper reviews the methods that were used to measure and simulate the IEQ factors, energy consumption and human behavior. Finally, the lack of knowledge in this field is based on the review demonstrated.

Findings - Most studies considered one or two IEQ factors to evaluate IEQ acceptance in buildings.

Further, weakness of simulating all IEQ factors at the same time is the deficiency of IEQ simulation, based on reviews. In the case of occupant behavior simulation, the uncertainty of human psychological parameter is a drawback to predict behavior.

Originality/value - Energy consumption, occupant health and productivity are related to IEQ. Human behavior affects building energy consumption directly. Simulation software and methods can predict IEQ factors and human behavior. Therefore, reviewing the existing studies is critical to find new methods for measuring and simulating IEQ, energy consumption and human behavior in buildings.



- C1 [Mahyuddin, Norhayati] Univ Malaya, Dept Bldg Surveying, Fac Built Environm, Kuala Lumpur, Malaysia.  
Univ Malaya, Ctr Bldg Construct & Trop Architecture BuCTA, Fac Built Environm, Kuala Lumpur, Malaysia.
- RP Mahyuddin, N (reprint author), Univ Malaya, Dept Bldg Surveying, Fac Built Environm, Kuala Lumpur, Malaysia.  
EM hayati@um.edu.my
- RI Shafigh, Payam/J-3430-2015  
OI Shafigh, Payam/0000-0002-8576-3984
- CR Anderson JR, 1998, ATOMIC COMPONENTS TH  
Palanisamy K., 2014, APPL MECH MAT T TECH, P1665  
Asadi I., 2014, INDOOR AIR QUALITY I  
Ashrae A., 2007, ENTILATION ACCEPTABL  
Aune M, 2009, FACILITIES, V27, P44, DOI 10.1108/02632770910923081  
Azar E., 2015, J COMPUT CIVIL ENG, V30  
Bourgeois D, 2006, ENERG BUILDINGS, V38, P814, DOI 10.1016/j.enbuild.2006.03.002  
Brager GS, 1998, ENERG BUILDINGS, V27, P83, DOI 10.1016/S0378-7788(97)00053-4  
Cao B, 2012, BUILD ENVIRON, V47, P394, DOI 10.1016/j.buildenv.2011.06.022  
Card SK, 1983, PSYCHOL HUMAN COMPUT  
Citherlet S, 2001, ENERG BUILDINGS, V33, P451, DOI 10.1016/S0378-7788(00)00108-0  
Clausen G, 2008, HVAC&R RES, V14, P103, DOI 10.1080/10789669.2008.10390996  
David Heinzerling, 2013, BUILD ENVIRON, V70, P210  
De Giuli V, 2012, BUILD ENVIRON, V56, P335, DOI 10.1016/j.buildenv.2012.03.024  
Eggleston R. G., 2000, P AIAA FALL S SERIES  
Evans GW, 2000, J APPL PSYCHOL, V85, P779, DOI 10.1037/0021-9010.85.5.779  
Fanger P. O., 1970, THERMAL COMFORT ANAL  
Federspiel C., 1998, ASHRAE T, V104, P912  
Fisk WJ, 1997, INDOOR AIR, V7, P158, DOI 10.1111/j.1600-0668.1997.t01-1-00002.x  
Fisk W. J., 2011, LBNL41849  
Freed M. A., 1999, THESIS  
Havenith G, 1999, ANN OCCUP HYG, V43, P289, DOI 10.1093/annhyg/43.5.289  
Hensen J. L. M., 2011, BUILDING PERFORMANCE, P1  
Heschong L, 2002, J ILLUM ENG SOC, V31, P101, DOI 10.1080/00994480.2002.10748396  
Hoes P, 2009, ENERG BUILDINGS, V41, P295, DOI 10.1016/j.enbuild.2008.09.008  
Hygge S, 2001, J ENVIRON PSYCHOL, V21, P291, DOI 10.1006/jevps.2001.0222  
ISO P, 2005, 7730 ISOP  
Jensen K. L., 2005, ACOUSTICAL QUALITY O  
Just MA, 1999, HUM BRAIN MAPP, V8, P128, DOI 10.1002/(SICI)1097-0193(1999)8:2/3<128::AID-HBM10>3.3.CO;2-7  
Kashif A, 2013, ENERG BUILDINGS, V56, P85, DOI 10.1016/j.enbuild.2012.09.042  
Kieras D. E., 1995, P 1 INT S COMM CONTR  
Kjaergaard S. K., 1993, EFFECTS TEMPERATURE  
Kolokotsa D, 2005, ENERG BUILDINGS, V37, P93, DOI 10.1016/j.enbuild.2004.05.008  
Lai ACK, 2009, ENERG BUILDINGS, V41, P930, DOI 10.1016/j.enbuild.2009.03.016  
Langevin J., 2014, HUMAN BEHAV LOW ENER  
Leaman A, 2007, BUILD RES INF, V35, P662, DOI 10.1080/09613210701529518  
Malkawi A., 2011, 12 C INT BUILD PERF  
Hensen J. L., 2015, PREDICTING SATISFACT  
MENDELL MJ, 1993, INDOOR AIR, V3, P227  
Nicol JF, 2011, BUILD RES INF, V39, P183, DOI 10.1080/09613218.2011.556824  
NORDSTROM K, 1995, INDOOR ENVIRON, V4, P37  
Olesen B. W., 2012, REHVA J, V49, P6  
Papadopoulos S, 2016, ENERG BUILDINGS, V128, P214, DOI 10.1016/j.enbuild.2016.06.079  
Peretti C., 2011, INDOOR ENV QUALITY S  
Phillips TJ, 2015, SCI TECHNOL BUILT EN, V21, P80, DOI 10.1080/10789669.2014.975056  
Porter SR, 2004, NEW DIRECTIONS I RES, V121, P63, DOI DOI 10.1002/IR.101  
Rijal HB, 2007, ENERG BUILDINGS, V39, P823, DOI 10.1016/j.enbuild.2007.02.003  
Salter C., 2003, CASE STUDIES METHOD

Seppanen O., 2004, CONTROL TEMPERATURE  
 Sierhuis Maarten, 2007, International Journal of Simulation & Process Modelling, V3, P134, DOI 10.1504/IJSPM.2007.015238  
 Simonson CJ, 2002, INDOOR AIR, V12, P243, DOI 10.1034/j.1600-0668.2002.01128.x  
 Turner C., 2008, NEW BUILDINGS I, V4, P1  
 Visser R., 1992, VERLICHTING INTE  
 Vorlander M, 2013, J ACOUST SOC AM, V133, P1203, DOI 10.1121/1.4788978  
 Wargocki P, 2002, INDOOR AIR, V12, P74, DOI 10.1034/j.1600-0668.2002.01101.x  
 WHERRY RJ, 1976, MONITORING BEHAVIOR, P283  
 Wong LT, 2008, BUILD ENVIRON, V43, P1, DOI 10.1016/j.buildenv.2007.01.001  
 Yudelson J., 2010, GREEN BUILDING REVOL  
 Zachary W., 1998, MAKING DECISIONS STR, P315  
 Zhang Z, 2009, ATMOS ENVIRON, V43, P319, DOI 10.1016/j.atmosenv.2008.09.041

NR 60

TC 0

Z9 0

U1 5

U2 7

PU EMERALD GROUP PUBLISHING LTD

PI BINGLEY

PA HOWARD HOUSE, WAGON LANE, BINGLEY BD16 1WA, W YORKSHIRE, ENGLAND

SN 0263-2772

EI 1758-7131

J9 FACILITIES

J1 Facilities

PY 2017

VL 35

IS 11-12

BP 684

EP 695

DI 10.1108/F-06-2016-0062

PG 12

WC Management

SC Business & Economics

GA FF0JB

UT WOS:000408586900006

DA 2018-05-03

ER

PT B

AU Bakhouya, M

NaitMalek, Y

Elmouatamid, A

Lachhab, F

Berouine, A

Boulmrharj, S

Ouladsine, R

Felix, V

Zinedine, K

Khaidar, M

Elkamoune, N

AF Bakhouya, M.

NaitMalek, Y.

Elmouatamid, A.

Lachhab, F.

Berouine, A.

Boulmrharj, S.

Ouladsine, R.

- Felix, V.  
 Zinedine, K.  
 Khaidar, M.  
 Elkamoune, N.  
 BE Essaaidi, M  
 Zbakh, M  
 TI Towards a Context-Driven Platform using IoT and Big Data Technologies  
 for Energy Efficient Buildings  
 SO PROCEEDINGS OF 2017 3RD INTERNATIONAL CONFERENCE OF CLOUD COMPUTING  
 TECHNOLOGIES AND APPLICATIONS (CLOUDTECH)  
 LA English  
 DT Proceedings Paper  
 CT 3rd International Conference of Cloud Computing Technologies and  
 Applications (CloudTech)  
 CY OCT 24-26, 2017  
 CL Rabat, MOROCCO  
 SP IEEE, Higher Natl Sch Comp Sci & Syst Anal, Mohamed V Univ Rabat, Fac Sci Rabat, Moroccan Assoc  
 Cloud Comp  
 DE Energy Efficient Buildings; Big data; IoT; Complex-event processing;  
 Context-awareness  
 ID SYSTEMS  
 AB Context-awareness is crucial for leveraging energy-efficient buildings by developing intelligent control  
 approaches in which sensing and actuation tasks are performed according to the contextual changes. This  
 could be done by including the users' actions and behaviours in up-to-date context taking into account the  
 complex interlinked elements, situations, processes, and their dynamics. In this paper, we introduce a  
 holistic platform that integrates recent sensing/actuating and Big data technologies for monitoring and  
 data processing. The main aim is to develop context-driven control approaches whereby energy  
 consumption, production, and storage could be controlled according to actual situations (e.g., occupancy,  
 occupant behaviour patterns, energy production patterns, and weather data). A platform prototype was  
 deployed in our university test site. Experiments have been conducted and preliminary results show the  
 usefulness of this holistic platform for monitoring and data processing in energy efficient buildings.  
 C1 [Bakhouya, M.; NaitMalek, Y.; Elmouatamid, A.; Lachhab, F.; Berouine, A.; Boulmrharj, S.; Ouladsine, R.;  
 Felix, V.] Int Univ Rabat, TICLab, Fac Comp & Logist, Sala El Jadida, Morocco.  
 [Elmouatamid, A.; Boulmrharj, S.; Zinedine, K.; Khaidar, M.; Elkamoune, N.] Chouaib Doukali Univ, Fac  
 Sci El Jadida UCD, El Jadida, Morocco.  
 RP Zinedine, K (reprint author), Chouaib Doukali Univ, Fac Sci El Jadida UCD, El Jadida, Morocco.  
 EM zinedine@ucd.ac.ma; khaidar.medd@gmail.com; elkamoune@gamil.com  
 FU MIGRID [5-398]; USAID under the PEER program; CASANET; MESRSFC; CNRST  
 FX This work is supported by MIGRID (Grant 5-398), which is funded by USAID  
 under the PEER program (2017-2019), and by CASANET (2016-2018), funded  
 by MESRSFC and CNRST.  
 CR Abid M., 2017, 1 INT C MAT SCI ENG  
 Ariol Vitor T., 2016, BATT INT STAT BATT C  
 Bordin C, 2017, RENEW ENERG, V101, P417, DOI 10.1016/j.renene.2016.08.066  
 Boulmrharj S., IRSEC 2017 UNPUB  
 Coronato A, 2012, INT CONF SELF SELF, P187, DOI 10.1109/SASOW.2012.40  
 De Florio V, 2013, SYST RES BEHAV SCI, V30, P750, DOI 10.1002/sres.2242  
 European Commission, 2010, INFORM SOC  
 Elmouatamid A., IRSEC 2017, P1  
 Federal R&D Agenda for Net Zero Energy, 2008, HIGH PERF GREEN BUIL  
 Kamienski C., 2015, IEEE WF IOT  
 Kamienski C, 2017, COMPUT COMMUN, V104, P1, DOI 10.1016/j.comcom.2016.09.014  
 Lachhab F., 2016, SERIES NONLINEAR SYS, V18, P247  
 Lachhab F., IRSEC 2017  
 LACHHAB F, 2016, HPCS, P961  
 Lachhab F., 2015, P IRSEC 2015 3 INT R, DOI [10.1109/IRSEC.2015.7454986, DOI  
 10.1109/IRSEC.2015.7454986]  
 Lachhab F., 2017, CONCURR COMP-PRACT E, DOI [10.1002/cpe.4380, DOI 10.1002/CPE.4380]

Lachhab F., 2017, 4 CODIT C APR 5 7 BA  
 Maleka YN, 2017, PROCEDIA COMPUT SCI, V113, P429, DOI 10.1016/j.procs.2017.08.281  
 Ouladsine R., 2017, INT J PHOTO IN PRESS  
 Shahrivari S, 2014, COMPUTERS, V3, DOI 10.3390/computers3040117  
 Nguyen TA, 2013, ENERGBUILDINGS, V56, P244, DOI 10.1016/j.enbuild.2012.09.005  
 Ye J., 2008, ICT ENERGY EFFICIENC  
 [Anonymous], 2009, ICT LOW CORBON EC SM

NR 23

TC 0

Z9 0

U1 2

U2 2

PU IEEE

PI NEW YORK

PA 345 E 47TH ST, NEW YORK, NY 10017 USA

BN 978-1-5386-1115-9

PY 2017

BP 324

EP 328

PG 5

WC Computer Science, Theory &amp; Methods; Engineering, Electrical &amp; Electronic

SC Computer Science; Engineering

GA BJ6BE

UT WOS:000426451400048

DA 2018-05-03

ER

PT B

AU Bianchini, G

Casini, M

Pepe, D

Vicino, A

Zanvettor, GG

AF Bianchini, Gianni

Casini, Marco

Pepe, Daniele

Vicino, Antonio

Zanvettor, Giovanni Gino

GP IEEE

TI Optimal Demand-Response Operation of Heating and Energy Storage in Smart Buildings

SO 2017 AEIT INTERNATIONAL ANNUAL CONFERENCE

LA English

DT Proceedings Paper

CT AEIT International Annual Conference (AEIT)

CY SEP 20-22, 2017

CL Cagliari, ITALY

SP AEIT, Regione Autonoma Sardegna, Comun Cagliari, Univ Cagliari, Confindustria, IEEE IES, Consiglio

Nazl Ingn, Ordine Ingn Cagliari Scoula Formazione, CNPI, Collegio Periti Industriali Periti Industriali

Laureati Provincia Cagliari

ID SYSTEMS

AB This paper deals with the problem of minimizing the electricity bill of smart buildings equipped with centralized heating systems and thermal and electrical storage devices. Building participation in a Demand-Response program in the form of price-volume signals is also considered. The proposed solution is based on a Model Predictive Control approach to operate the heating system and the storage devices in an optimal fashion, under thermal comfort and technological constraints.

C1 [Bianchini, Gianni; Casini, Marco; Pepe, Daniele; Vicino, Antonio; Zanvettor, Giovanni Gino] Univ Siena, Dipartimento Ingn Informaz & Sci Matemat, Siena, Italy.

RP Bianchini, G (reprint author), Univ Siena, Dipartimento Ingn Informaz & Sci Matemat, Siena, Italy.  
 EM giannibi@diism.unisi.it; casini@diism.unisi.it; pepe@diism.unisi.it;  
 vicino@diism.unisi.it; zanvettor@student.unisi.it

CR Baboli P., 2011, IEEE POW EN SOC GEN, P1  
 Belhomme R., 2011, P IEEE PES GEN M  
 Bianchini G, 2016, APPL ENERG, V168, P159, DOI 10.1016/j.apenergy.2016.01.088  
 Chassin DP, 2015, APPL ENERG, V155, P816, DOI 10.1016/j.apenergy.2015.06.048  
 Giannitrapani A., 2016, IEEE T SMART GRID  
 Koponen P., 2012, 2012 IEEE International Energy Conference (ENERGYCON 2012), P623, DOI  
 10.1109/EnergyCon.2012.6348227  
 Kwak Y, 2015, APPL ENERG, V155, P1, DOI 10.1016/j.apenergy.2015.05.096  
 Loevenbruck P., 2016, CIRED WORKSH 2016 JU, P1  
 Ma YD, 2012, IEEE T CONTR SYST T, V20, P796, DOI 10.1109/TCST.2011.2124461  
 Murthy Balijepalli V. S. K., 2011, 2011 IEEE PES Innovative Smart Grid Technologies - India (ISGT India),  
 P236, DOI 10.1109/ISET-India.2011.6145388  
 Patteuw D, 2015, APPL ENERG, V151, P306, DOI 10.1016/j.apenergy.2015.04.014  
 Williams C. J. C., 2012, P LAS EL C QUANT EL, P1

NR 12  
 TC 0  
 Z9 0  
 U1 0  
 U2 0  
 PU IEEE  
 PI NEW YORK  
 PA 345 E 47TH ST, NEW YORK, NY 10017 USA  
 BN 978-8-8872-3737-5  
 PY 2017  
 PG 6  
 WC Engineering, Electrical & Electronic  
 SC Engineering  
 GA BJ6DO  
 UT WOS:000426518700068  
 DA 2018-05-03  
 ER

PT S  
 AU Bianchini, G  
 Casini, M  
 Pepe, D  
 Vicino, A  
 Zanvettor, GG

AF Bianchini, Gianni  
 Casini, Marco  
 Pepe, Daniele  
 Vicino, Antonio  
 Zanvettor, Giovanni Gino

GP IEEE  
 TI An Integrated MPC Approach for Demand-Response Heating and Energy  
 Storage Operation in Smart Buildings  
 SO 2017 IEEE 56TH ANNUAL CONFERENCE ON DECISION AND CONTROL (CDC)  
 SE IEEE Conference on Decision and Control  
 LA English  
 DT Proceedings Paper  
 CT IEEE 56th Annual Conference on Decision and Control (CDC)  
 CY DEC 12-15, 2017  
 CL Melbourne, AUSTRALIA  
 SP IEEE  
 DE Energy Systems; Building heating management; Energy storage;

Demand-Response; Model predictive control  
ID SYSTEMS

AB This paper deals with the problem of minimizing the electricity bill of smart buildings equipped with centralized heating systems and thermal and electrical storage devices. Building participation in a Demand-Response program in the form of price-volume signals is also considered. The proposed solution is based on a Model Predictive Control approach to operate the heating system and the storage devices in an optimal fashion, under thermal comfort and technological constraints.

C1 [Bianchini, Gianni; Casini, Marco; Pepe, Daniele; Vicino, Antonio; Zanvettor, Giovanni Gino] Univ Siena, Dipartimento Ingn Informaz & Sci Matema, Via Roma 56, I-53100 Siena, Italy.

RP Bianchini, G (reprint author), Univ Siena, Dipartimento Ingn Informaz & Sci Matema, Via Roma 56, I-53100 Siena, Italy.

EM giannibi@diism.unisi.it; casini@diism.unisi.it; pepe@diism.unisi.it;  
vicino@diism.unisi.it; zanvettor@student.unisi.it

RI Casini, Marco/B-7515-2012

CR Albadi MH, 2007, IEEE POW ENG SOC GEN, P1, DOI DOI 10.1109/PES.2007.385728

Baboli P., 2011, IEEE POW EN SOC GEN, P1

Belhomme R., 2011, P IEEE PES GEN M

Bianchini G, 2016, APPL ENERG, V168, P159, DOI 10.1016/j.apenergy.2016.01.088

Bianchini G, 2014, IEEE DECIS CONTR P, P4862, DOI 10.1109/CDC.2014.7040148

Chassin DP, 2015, APPL ENERG, V155, P816, DOI 10.1016/j.apenergy.2015.06.048

Cole WJ, 2013, P AMER CONTR CONF, P449

Giannitrapani A., 2016, IEEE T SMART GRID

Kelman A, 2011, IEEE DECIS CONTR P, P5125, DOI 10.1109/CDC.2011.6161498

Koponen P., 2012, 2012 IEEE International Energy Conference (ENERGYCON 2012), P623, DOI 10.1109/EnergyCon.2012.6348227

Kwak Y, 2015, APPL ENERG, V155, P1, DOI 10.1016/j.apenergy.2015.05.096

Ljung L., 2007, SYSTEM IDENTIFICATIO

Ljung L., 1999, SYSTEM IDENTIFICATIO

Loevenbruck P., 2016, CIRED WORKSH 2016 JU, P1

Ma YD, 2012, IEEE T CONTR SYST T, V20, P796, DOI 10.1109/TCST.2011.2124461

Murthy Balijepalli V. S. K., 2011, 2011 IEEE PES Innovative Smart Grid Technologies - India (ISGT India), P236, DOI 10.1109/ISET-India.2011.6145388

Oldewurtel F, 2010, IEEE DECIS CONTR P, P1927, DOI 10.1109/CDC.2010.5717458

Oldewurtel F, 2010, P AMER CONTR CONF, P5100

Patteeuw D, 2015, APPL ENERG, V151, P306, DOI 10.1016/j.apenergy.2015.04.014

Williams C. J. C., 2012, P LAS EL C QUANT EL, P1

NR 20

TC 0

Z9 0

U1 0

U2 0

PU IEEE

PI NEW YORK

PA 345 E 47TH ST, NEW YORK, NY 10017 USA

SN 0743-1546

BN 978-1-5090-2873-3

J9 IEEE DECIS CONTR P

PY 2017

PG 6

WC Automation & Control Systems; Engineering, Electrical & Electronic

SC Automation & Control Systems; Engineering

GA BJ3ZP

UT WOS:000424696903119

DA 2018-05-03

ER

PT S

AU Cascone, Y

- Ferrara, M  
Giovannini, L  
Serale, G
- AF Cascone, Ylenia  
Ferrara, Maria  
Giovannini, Luigi  
Serale, Gianluca
- BE Littlewood, J  
Howlett, RJ
- TI Ethical issues of monitoring sensor networks for energy efficiency in smart buildings: a case study  
SO SUSTAINABILITY IN ENERGY AND BUILDINGS 2017  
SE Energy Procedia  
LA English  
DT Proceedings Paper  
CT 9th International Conference on Sustainability and Energy in Buildings (SEB)  
CY JUL 05-07, 2017  
CL Chania, GREECE  
SP KES Int, Cardiff Metropolitan Univ, Cardiff Sch Art & Design, Sustainable & Resilient Built Environm Res Grp
- DE sensors; Internet of Things; ethics; privacy; security; monitoring; energy; indoor environmental quality; control
- ID SPERM DNA FRAGMENTATION; WI-FI; PUBLIC BUILDINGS; PRIVACY; MANAGEMENT; MOTILITY; INTERNET; SYSTEMS; MODEL
- AB The development of Internet of Things (IoT) based sensors has become crucial for analyzing and optimizing the energy-performance of buildings. However, researchers and professionals should be prepared to deal with the social and thus ethical issues arising from the use of such technologies. Based on a real case-study, we present a detailed analysis of the networks of stakeholders and the consequent ethical issues related to the implementation of energy and IEQ sensors network in an Italian university campus. Alternative scenarios for eliminating or reducing the criticalities related to security and privacy issues are proposed. (C) 2017 The Authors. Published by Elsevier Ltd.
- C1 [Cascone, Ylenia; Ferrara, Maria; Giovannini, Luigi; Serale, Gianluca] Politecn Torino, DENERG, TEBE Res Grp, Corso Duca Abruzzi 24, I-10129 Turin, Italy.
- RP Serale, G (reprint author), Politecn Torino, DENERG, TEBE Res Grp, Corso Duca Abruzzi 24, I-10129 Turin, Italy.
- EM gianluca.serale@polito.it
- OI Ferrara, Maria/0000-0002-3753-858X
- CR Aghemo C, 2013, FRONT ARCHIT RES, V2, P147, DOI 10.1016/j.foar.2012.11.001  
Ahlbom A, 1998, HEALTH PHYS, V74, P494  
Ahmad MW, 2016, ENERG BUILDINGS, V120, P85, DOI 10.1016/j.enbuild.2016.03.059  
Avendano C, 2012, FERTIL STERIL, V97, P39, DOI 10.1016/j.fertnstert.2011.10.012  
Capozzoli A, 2015, ENRGY PROCED, V83, P370, DOI 10.1016/j.egypro.2015.12.212  
Chau JC, 2013, PROCEDIA COMPUT SCI, V19, P556, DOI 10.1016/j.procs.2013.06.074  
Choy JT, 2012, EUR UROL, V62, P1196, DOI 10.1016/j.eururo.2012.09.017  
Cig B, 2015, BBA-BIOMEMBRANES, V1848, P2756, DOI 10.1016/j.bbamem.2015.02.013  
European Union, 2016, OFFICIAL J EUROPEA L, V119, P1  
Fabrizio E, 2017, WOOD PUBL SER CIVIL, P279, DOI 10.1016/B978-0-08-101128-7.00010-1  
Fiorentini M, 2017, APPL ENERG, V187, P465, DOI 10.1016/j.apenergy.2016.11.041  
Hernandez G, 2014, P BLACK HAT US 2014, P1  
Commission on Non-Ionizing Radiation Protection (ICNIRP), 2009, EXP HIGH FREQ EL FIE  
Kersken M, 2013, SIMULATION STUDY ENE  
Nguyen KT, 2015, AD HOC NETW, V32, P17, DOI 10.1016/j.adhoc.2015.01.006  
Mantelero A, 2016, COMPUT LAW SECUR REV, V32, P238, DOI 10.1016/j.clsr.2016.01.014  
Molina-Solana M, 2017, RENEW SUST ENERG REV, V70, P598, DOI 10.1016/j.rser.2016.11.132  
Pachon-Garcia FT, 2015, MEASUREMENT, V63, P309, DOI 10.1016/j.measurement.2014.12.002  
Pesola A, 2014, ENERG BUILDINGS, V72, P229, DOI 10.1016/j.enbuild.2013.10.037  
Pouillet Yves, 2009, Computer Law and Security Report, V25, P211, DOI 10.1016/j.clsr.2009.03.008

Rottondi C, 2013, COMPUT NETW, V57, P1699, DOI 10.1016/j.comnet.2013.02.018  
 Sicari S, 2015, COMPUT NETW, V76, P146, DOI 10.1016/j.comnet.2014.11.008  
 Sweeney L, 2002, INT J UNCERTAIN FUZZ, V10, P557, DOI 10.1142/S0218488502001648  
 Zhao L, 2013, ENERG BUILDINGS, V66, P41, DOI 10.1016/j.enbuild.2013.07.007  
 Zissis D, 2012, FUTURE GENER COMP SY, V28, P583, DOI 10.1016/j.future.2010.12.006  
 [Anonymous], 1998, WINGSPREAD STATEMENT

NR 26

TC 0

Z9 0

U1 0

U2 0

PU ELSEVIER SCIENCE BV

PI AMSTERDAM

PA SARA BURGERHARTSTRAAT 25, PO BOX 211, 1000 AE AMSTERDAM, NETHERLANDS

SN 1876-6102

J9 ENRGY PROCED

PY 2017

VL 134

BP 337

EP 345

DI 10.1016/j.egypro.2017.09.540

PG 9

WC Construction & Building Technology; GREEN & SUSTAINABLE SCIENCE &  
 TECHNOLOGY; Energy & Fuels; Engineering, Environmental

SC Construction & Building Technology; Science & Technology - Other Topics;  
 Energy & Fuels; Engineering

GA BJ6HP

UT WOS:000426694800033

OA gold

DA 2018-05-03

ER

PT S

AU Cravioto, J

Yasunaga, R

Yamasue, E

AF Cravioto, Jordi

Yasunaga, Reika

Yamasue, Eiji

BE Takata, S

Umeda, Y

Kondoh, S

TI Comparative analysis of average time of use of home appliances

SO 24TH CIRP CONFERENCE ON LIFE CYCLE ENGINEERING

SE Procedia CIRP

LA English

DT Proceedings Paper

CT 24th CIRP Conference on Life Cycle Engineering (CIRP LCE)

CY MAR 08-10, 2017

CL Kamakura, JAPAN

SP CIRP, Denso, DMG MORI, Mazak Fdn, JSPS Grant Aid, Japan World Exposit 1970 Commemorat Fund

DE Average time of use; Home appliances; middle-income economies

ID REPLACEMENT; EQUIPMENT; HOUSEHOLD; ENERGY

AB Greater appliance penetration has been associated with economic advancement, sophisticated lifestyles, improved safety, health and several environmental benefits. However, recent studies suggest that easier appliances acquisition also push reductions in the total time of appliance use, regardless of the gains achieved by technological advancement. With this respect, estimation of the total time of use of appliances is the first important step towards understanding such a trade-off. This study reports a summary of the



average age of appliances in developing countries from Southeast Asia, Mexico and some developed countries, as well as a discussion of the relationship between income level and age of appliances using scatter plots of the summarised data. Six categories of appliances (personal computers, mobile phones, washing machines, refrigerators, air conditioners and TVs) were summarised from the literature, and the observed differences in the average age were hypothesised to have connection with income level and the appliance penetration rates. Average appliance age in a greater scale of income (using GNI per capita, PPP) also showed two main trends. Namely, a U-shaped and linear pattern in which the six appliances could be categorised. (C) 2017 The Authors. Published by Elsevier B.V.

C1 [Cravioto, Jordi; Yamasue, Eiji] Ritsumeikan Univ, Kusatsu, Shiga 5258577, Japan.

[Yasunaga, Reika] Kyoto Univ, Grad Sch Energy Sci, Sakyo Ku, Kyoto 6068314, Japan.

RP Cravioto, J (reprint author), Ritsumeikan Univ, Kusatsu, Shiga 5258577, Japan.

EM jordi-c@gst.ritsumei.ac.jp

FU Environment Research and Technology Development Fund of the Ministry of the Environment, Japan [S-16]

FX This research was partly supported by the Environment Research and Technology Development Fund (S-16) of the Ministry of the Environment, Japan.

CR Arroyo-Cabanas FG, 2009, ENER POLICY, V37, P4737, DOI 10.1016/j.enpol.2009.06.032

Cravioto J, 2014, ENER POLICY, V73, P110, DOI 10.1016/j.enpol.2014.04.031

Davis L., 2012, EC HOUSEHOLD E UNPUB

De Kleine RD, 2011, ENER POLICY, V39, P3144, DOI 10.1016/j.enpol.2011.02.065

The Energy Conservation Center Japan, 2014, REP RAT US INT EN

Gutierrez E, 2011, WASTE MANAGE RES, V29, P622, DOI 10.1177/0734242X10377914

Huong T. T., 2015, CONSUMER MARKET COND, V1

Japan Environmental Council, 2009, STAT ENV AS 2006 200

Japan International Cooperation Agency, 2014, STUD E WAST MAN AS R

Kallbekken Steffen, 2013, Journal of Consumer Policy, V36, P1, DOI 10.1007/s10603-012-9211-z

Kido Y., 1997, ENV SYSTEM RES, V25, P367

Kim HC, 2003, ENVIRON SCI TECHNOL, V37, P5407, DOI 10.1021/es0345221

Kojima M., 2016, 577 IDE

Lutz JD, 2011, HVAC&R RES, V17, P726, DOI 10.1080/10789669.2011.558166

Mungcharoen T, REC BAS EC RBE PATT, P218

National Association of Home Buildings, 2013, STUD LIF EXP HOM COM

Oguchi M., 2007, J JAPAN SOC WASTE MA, V18, P182

Sasaki S., 2007, POLICY EC RES

Sasaki S, 2013, 4 JAP EXT TARD ORG

Suna D., 2011, USING ENERGY EFFICIE

Wijaya ME, 2013, APPL ENER, V112, P981, DOI 10.1016/j.apenergy.2013.02.036

Yamasue E., 2015, PRODUCT LIFETIMES EN

NR 22

TC 0

Z9 0

U1 0

U2 0

PU ELSEVIER SCIENCE BV

PI AMSTERDAM

PA SARA BURGERHARTSTRAAT 25, PO BOX 211, 1000 AE AMSTERDAM, NETHERLANDS

SN 2212-8271

J9 PROC CIRP

PY 2017

VL 61

BP 657

EP 662

DI 10.1016/j.procir.2016.11.248

PG 6

WC Engineering, Industrial

SC Engineering

GA BI0AK

UT WOS:000404511900114

OA gold

DA 2018-05-03

ER

PT S

AU Damrongsak, D

Wongsapai, W

AF Damrongsak, Det

Wongsapai, Wongkot

BE Alam, F

Jazar, R

Chowdhury, H

TI Personnel responsible for energy capacity building programs for sustainable energy efficiency in Thailand

SO 1ST INTERNATIONAL CONFERENCE ON ENERGY AND POWER, ICEP2016

SE Energy Procedia

LA English

DT Proceedings Paper

CT 1st International Conference on Energy and Power (ICEP)

CY DEC 14-16, 2016

CL RMIT Univ, Melbourne, AUSTRALIA

HO RMIT Univ

DE Energy efficiency curriculum; Energy capacity building; Energy conservation

AB Since 1992, the designated factory and commercial building in Thailand have to officially appoint their own personnel responsible for energy (PRE) under the Energy Conservation and Promotion Act B.E. 2535 (A.D. 1992). PRE is an important element for each designated facility to drive the energy management system and ensure its success of the program. In Thailand, one may become PRE from various methods, but most common way of becoming PRE is from PRE training programs under required educational background. This paper concludes the PRE training programs in Thailand which consists of five main curriculums as the following: 1) PRE for designated factory 2) PRE for designated building 3) Senior PRE theoretical training 4) Senior PRE practical training and 5) PRE for manager level. The first four curriculums are compulsory programs required by law while the last one is a voluntary program. The technical comparison between those five curriculums is presented. The driving mechanism to implement those five curriculums including barriers are also raised. (C) 2017 The Authors. Published by Elsevier Ltd.

C1 [Damrongsak, Det] Chiang Mai Univ, Dept Mech Engr, Fac Engr, Chiang Mai 50200, Thailand.

[Wongsapai, Wongkot] Chiang Mai Univ, Energy Technol Environm Res Ctr, Fac Engr, Chiang Mai 50200, Thailand.

RP Wongsapai, W (reprint author), Chiang Mai Univ, Energy Technol Environm Res Ctr, Fac Engr, Chiang Mai 50200, Thailand.

EM wongkot@eng.cmu.ac.th

CR DEDE, 1992, EN CONS PROM ACT

EPPO (Energy Policy and Planning Office), 2015, EN EFF PLAN 2015 203

Energy Policy and Planning office (EPPO), 2015, OIL PLAN 2015 2036

EPPO, 2015, POW DEV PLAN 2015 20

EPPO, 2015, GAS PLAN 2015 2036

EPPO, 2015, ALT EN DEV PLAN 2015

NR 6

TC 0

Z9 0

U1 0

U2 1

PU ELSEVIER SCIENCE BV

PI AMSTERDAM

PA SARA BURGERHARTSTRAAT 25, PO BOX 211, 1000 AE AMSTERDAM, NETHERLANDS

SN 1876-6102

J9 ENRGY PROCED

PY 2017  
 VL 110  
 BP 59  
 EP 64  
 DI 10.1016/j.egypro.2017.03.106  
 PG 6  
 WC Energy & Fuels; Engineering, Electrical & Electronic  
 SC Energy & Fuels; Engineering  
 GA BH7IP  
 UT WOS:000402566300010  
 OA gold  
 DA 2018-05-03  
 ER

PT B  
 AU Das, SK  
     Mukherjee, A  
 AF Das, Sajal Kanta  
     Mukherjee, A.  
 GP IEEE  
 TI IoT based Smart Home Management to enhance the services to the  
     Occupancies and minimized energy demand by controlling appliances using  
     Wireless Motes  
 SO 2017 INTERNATIONAL CONFERENCE ON MICROELECTRONIC DEVICES, CIRCUITS AND  
     SYSTEMS (ICMDCS)  
 LA English  
 DT Proceedings Paper  
 CT International conference on Microelectronic Devices, Circuits and  
     Systems (ICMDCS)  
 CY AUG 10-12, 2017  
 CL Vellore Inst Technol, Vellore, INDIA  
 SP Vellore Inst Technol, Sch Elect Engn, Dept Micro & Nanoelectron, IEEE Elect Devices Soc,  
     GlobalFoundries, Mentor  
 HO Vellore Inst Technol  
 DE Smart Houses; Intelligent Houses; Ambient Intelligence; IoT; Ubiquitous  
     computing; WSN  
 AB We have to set up a prototype model for smart Building environment with more advanced activity and  
     event classification techniques, as well as new adaptive service provision schemes to adjust the services  
     according to the user's behaviour model and the feedback provided by the user. Integration of the building  
     systems with embedded sensors, actuators and microcomputers or microcontrollers allows them to  
     communicate with one another through the building controller. We also expect to continue our work on  
     network optimization for sensing and control, and also expand our work into cross-products of higher  
     technological development. Examples of "things" include: People; Location (of objects); Time Information  
     (of objects); Condition (of objects). The quality of a daily life, reduction of costs and increasing security are  
     the main important issues when we design a smart environment for inside and outside of our building  
     areas.

C1 [Das, Sajal Kanta] Tripura Univ, Dept Informat Technol, Agartala, India.  
     [Mukherjee, A.] Tripura Univ, Dept Math, Agartala, India.  
 RP Das, SK (reprint author), Tripura Univ, Dept Informat Technol, Agartala, India.  
 EM sajalmtchcse@gmail.com  
 CR Arul S. B., 2014, WIRELESS HOME AUTOMA, V5, P133  
     Banatre Michel, 2008, COOPERATIND EMBEDDED  
     Carner P., 2009, PROJECT DOMUS DESIGN  
     Cho S., 2015, DECENTRALIZED SYSTEM, P8131  
     Crossbow Corporation, 2007, XSMESH US MAN REV D  
     Cuong Truong, 2012, 3 INT C INT THINGS I  
     Gubbi J, 2013, FUTURE GENER COMP SY, V29, P1645, DOI 10.1016/j.future.2013.01.010  
     Guinard D., 2011, WEB THINGS APPL ARCH

Heinzelman W. R., 1999, MobiCom'99. Proceedings of Fifth Annual ACM/IEEE International Conference on Mobile Computing and Networking, P174  
 Hussain Sajid, 2009, 2009 7 ANN COMM NETW  
 Islam A., 2014, DEV REN EN TECHN ICD, P1  
 Ghosh A., 2008, INT S COLL TECHN SYS  
 Murthy C. S. R., 2014, AD HOC WIRELESS NETW  
 Kundur D., 2005, P 7 ANN INT C MOB CO, P272  
 Skylight T., LIGHTING DESIGNING S, P1  
 Tilak S., 2002, ACM MOBILE COMPUTING, V6  
 Umer S., 2014, STABILITY ANAL SMART, V2  
 van Kranenburg Rob, 2011, 1 BERL S INT SOC OCT  
 Yang R, 2012, SUSTAIN CITIES SOC, V2, P1, DOI 10.1016/j.scs.2011.09.001

NR 19  
 TC 0  
 Z9 0  
 U1 0  
 U2 0  
 PU IEEE  
 PI NEW YORK  
 PA 345 E 47TH ST, NEW YORK, NY 10017 USA  
 BN 978-1-5386-1716-8  
 PY 2017  
 PG 6  
 WC Engineering, Electrical & Electronic  
 SC Engineering  
 GA BJ4LW  
 UT WOS:000425169900014  
 DA 2018-05-03  
 ER

PT S  
 AU Delmastro, C  
 Martinsson, F  
 Mutani, G  
 Corgnati, SP  
 AF Delmastro, Chiara  
 Martinsson, Fredrik  
 Mutani, Guglielmina  
 Corgnati, Stefano P.  
 BE Seto, K  
 Robinson, D  
 Virji, H  
 Kovacs, Z  
 Zhai, J  
 Sami, N  
 Pettit, C  
 Sridhar, KS

TI Modeling building energy demand profiles and district heating networks  
 for low carbon urban areas  
 SO URBAN TRANSITIONS CONFERENCE  
 SE Procedia Engineering  
 LA English  
 DT Proceedings Paper  
 CT Urban Transitions Conference  
 CY SEP, 2016  
 CL Shanghai, PEOPLES R CHINA  
 DE urban planning; heat strategies; buildings; district heating network;  
 scenarios analysis

AB Urban energy consumptions growth has become an urgent topic that requires solutions for significantly reduce carbon emission in the next decades. This paper aims in exploring the integration of building performance improvement and low carbon district heat technological choices by considering the upgrade of conversion technologies, efficiency and the exploitation of local resources.

The paper is based on a GIS-based model that spatially characterize the space heating demand of urban buildings. Starting from clustering buildings with similar thermo-physical characteristics, the total energy use of buildings can be depicted and compared with the energy balance data of the city in order to scale the bottom-up results for matching the total load. Reasonable energy efficiency measures are further proposed by considering three different scenarios up to 2050. Long-term building scenarios are applied to a district heating simulation model for investigating how the reduction of building heat demand will impact the district heating production and operations. In particular, the combination of the building model and the district heating model aims at exploring the effects of district network expansion or new low carbon investments from an economic and environmental perspective. The model has been successfully applied to the city of Turin, Italy and the city of Stockholm, Sweden. The flexibility of the approach may allow it to be easily adjusted to different urban areas for providing indications on cost-effective strategies for efficient, low-carbon heat solutions in integrated energy systems. Results highlight that finding synergies between the demand and supply sector will lead to environmental and economic benefits, in particular for district-heated cities. (c) 2017 The Authors. Published by Elsevier Ltd.

C1 [Delmastro, Chiara; Mutani, Guglielmina; Corgnati, Stefano P.] Politecn Torino, Dept Energy, Cso Duca Abruzzi 24, I-10129 Turin, Italy.

[Martinsson, Fredrik] IVL Swedish Environm Res Inst, Valhallavagen 81, S-11427 Stockholm, Sweden.

RP Delmastro, C (reprint author), Politecn Torino, Dept Energy, Cso Duca Abruzzi 24, I-10129 Turin, Italy.

EM chiara.delmastro@polito.it

OI Delmastro, Chiara/0000-0002-4786-0839

CR Becchio C, 2016, ENERG BUILDINGS, V127, P590, DOI 10.1016/j.enbuild.2016.05.093

Difs K, 2010, ENERGY, V35, P3194, DOI 10.1016/j.energy.2010.04.001

European Council, 2011, ROADM MOV COMP LOW C

European Parliament, 2010, OFFICIAL J EUROPEAN

Lidberg T, 2016, ENERGY, V106, P45, DOI 10.1016/j.energy.2016.03.043

Moghadam S. Torabi, 2016, POSTCARBON IN PRESS

Moghadam S. Torabi, 2016, 9 INT C IMPR EN EFF

Mutani G., 2016, ENERGY PROC IN PRESS

Mutani G., 2015, J CIV ENG ARCHIT RES, V2, P1102

Truong NL, 2014, APPL ENERG, V118, P57, DOI 10.1016/j.apenergy.2013.12.009

International Energy Agency, 2016, EN TECHN PERSP 2016

SEA, 2013, EN SMAH 2012

Swedish Energy Agency (SEA) and Swedish National Board of Housing Building and Planning (SNBH),

2013, ET201324 SEA SNBH

Swedish Energy Agency, 2014, COMP DAT 44 REN PROJ

TABULA (Typology Approach for Building Stock Energy Assessment), 2009, TABULA TYP APPR BUIL

NR 15

TC 0

Z9 0

U1 0

U2 0

PU ELSEVIER SCIENCE BV

PI AMSTERDAM

PA SARA BURGERHARTSTRAAT 25, PO BOX 211, 1000 AE AMSTERDAM, NETHERLANDS

SN 1877-7058

J9 PROCEDIA ENGINEER

PY 2017

VL 198

BP 386

EP 397

DI 10.1016/j.proeng.2017.07.094

PG 12

WC Multidisciplinary Sciences; Urban Studies

SC Science & Technology - Other Topics; Urban Studies

GA BJ4ZK

UT WOS:000425682900034

OA gold

DA 2018-05-03

ER

PT B

AU Deng, JX

Shen, ZZ

AF Deng, Jian-Xun

Shen, Zhi-Zhou

BE Zhang, SH

Wei, PS

TI Energy saving reconstruction of existing residential buildings in hot summer and warm winter zones-experience learnt from home and abroad

SO MECHANICS AND ARCHITECTURAL DESIGN

LA English

DT Proceedings Paper

CT International Conference on Mechanics and Architectural Design (MAD)

CY MAY 14-15, 2016

CL Suzhou, PEOPLES R CHINA

DE Existing Buildings; Hot Summer and Warm Winter Zones; Energy Saving; Measures

AB Combined with cases of energy-saving existing building from home and abroad, this passage discusses about the reconstruction condition of existing buildings and makes a comparison by analyzing the existing buildings in terms of energy-saving technologies and relevant policies, which points out the existing energy-saving problems of existing buildings in Hot Summer and Warm Winter Zones in our country. Also, it sums up the experience of energy-saving reconstruction and finally proposes energy-saving measures.

C1 [Deng, Jian-Xun; Shen, Zhi-Zhou] Xiamen Univ, Sch Architecture & Civil Engn, Xiamen 361005, Fujian, Peoples R China.

RP Deng, JX (reprint author), Xiamen Univ, Sch Architecture & Civil Engn, Xiamen 361005, Fujian, Peoples R China.

EM djxun21cn@sina.com; uniquevector@163.com

FU Xiamen Construction and Technology Projects [XJK2013-1-3]

FX Xiamen Construction and Technology Projects (Item Code: XJK2013-1-3).

CR Chen Elan, 2012, APPLIANCE LOW E GLAS

De Linxian, 2010, NEW BUILDING, P77

Hu Daming, 2005, NATL BUILDING ENERGY, P135

Tian Lingjiang, 2011, HOUSING IND, P80

NR 4

TC 0

Z9 0

U1 0

U2 0

PU WORLD SCIENTIFIC PUBL CO PTE LTD

PI SINGAPORE

PA PO BOX 128 FARRER RD, SINGAPORE 9128, SINGAPORE

BN 978-981-3149-02-1; 978-981-3149-01-4

PY 2017

BP 297

EP 306

PG 10

WC Construction & Building Technology; Engineering, Civil; Engineering, Geological

SC Construction & Building Technology; Engineering

GA BI6UI

UT WOS:000413694900040

DA 2018-05-03  
ER

PT S

AU Di Ruocco, G  
Sicignano, C  
Sessa, A

AF Di Ruocco, Giacomo  
Sicignano, Claudia  
Sessa, Anna

BE Ding, L  
Fiorito, F  
Osmond, P

TI Integrated methodologies energy efficiency of historic buildings

SO INTERNATIONAL HIGH-PERFORMANCE BUILT ENVIRONMENT CONFERENCE - A  
SUSTAINABLE BUILT ENVIRONMENT CONFERENCE 2016 SERIES (SBE16), IHBE 2016

SE Procedia Engineering

LA English

DT Proceedings Paper

CT International High-Performance Built Environment Conference (iHBE)

CY NOV 17-18, 2016

CL Sydney, AUSTRALIA

SP UNSW Built Environm, CRC Low Carbon Living, UrbanGrowth NSW

DE Historic buildings; integrated approach; sustainability; reversibility;  
BIM

AB For several years, Italian associations and research organizations have been developing strategies aimed at evaluating and increasing energy efficiency in historic buildings, offering a sort of guidelines about this issue. These strategies are intended to provide useful information for a correct approach to the energy retrofit of historic buildings, offering a framework as well as innovative technical solutions for integrated design intervention restoration of historic buildings. The purpose of the guidelines is investigating the relationship between architectural restoration and plant installations, which are - now - rarely explored problems theoretically and experimentally, by introducing the concept of improvement instead of adapting to the standards of safety and comfort, in accordance with the integrated conservation strategies (Amsterdam Declaration, 1975). Effective proposals of a historic building energy retrofit (or a cultural landscape) can be implemented in a conscious way, tending to an architectural and landscape integration, without changing the monumental building, as it often happens in the case of adaptation of a new building to the new rules. The proposed methodology is based on an interdisciplinary approach, articulated in successive phases: analysis of plant systems, measurements of environmental quality, identification of vulnerabilities, defining appropriate intervention techniques, verification of the improvement achieved. The case study concerns a historic building in Salerno (Italy) dating back to the eighteenth century, used as a school complex. It will be investigated by the morphological, technological, static, energy point of view, by the use of a BIM platform, in order to identify energy efficiency measures consistent with the technological and structural aspects. The objective is, therefore, to identify an integrated methodology of energy retrofit of historic buildings. (C) 2017 The Authors. Published by Elsevier Ltd.

C1 [Di Ruocco, Giacomo; Sessa, Anna] Univ Salerno, Via Giovanni Paolo 2 132, I-84084 Fisciano, Italy.

[Sicignano, Claudia] Univ Naples Federico II, Via Tarsia 31, I-80135 Naples, Italy.

RP Di Ruocco, G (reprint author), Univ Salerno, Via Giovanni Paolo 2 132, I-84084 Fisciano, Italy.

EM gdiruocco@unisa.it

CR D'Auria S., 2014, CSE J CITY SAFET JUL, P107

De M. Angelis, 1908, DESIGN NEW W SCH BUI

Del Regno R., 2012, THESIS

Di Ruocco G., 2014, INNOVATIVE NONINVASE, P1

Di Ruocco G., 2012, CITY ENERGY, P267

Dodaro V., 1997, SALERNO FASCIST PERI

[Anonymous], 2011, CENSUS ISTAT 2011

[Anonymous], 2015, GUID EN EFF IMPR CUL

Pracchi V., 2013, ENERGY EFFICIENCY BU

NR 9

TC 0

Z9 0

U1 0

U2 0

PU ELSEVIER SCIENCE BV

PI AMSTERDAM

PA SARA BURGERHARTSTRAAT 25, PO BOX 211, 1000 AE AMSTERDAM, NETHERLANDS

SN 1877-7058

J9 PROCEDIA ENGINEER

PY 2017

VL 180

BP 1653

EP 1663

DI 10.1016/j.proeng.2017.04.328

PG 11

WC Construction & Building Technology; GREEN & SUSTAINABLE SCIENCE &  
TECHNOLOGY; Engineering, Environmental; Engineering, CivilSC Construction & Building Technology; Science & Technology - Other Topics;  
Engineering

GA B10JD

UT WOS:000404873600171

OA gold

DA 2018-05-03

ER

PT S

AU Ding, Q

Cai, WJ

Wang, C

AF Ding, Qun

Cai, Wenjia

Wang, Can

BE Yan, J

Sun, F

Chou, SK

Desideri, U

Li, H

Campana, P

Xiong, R

TI Impact of household consumption activities on energy consumption in

China-evidence from the lifestyle perspective and input-output analysis

SO 8TH INTERNATIONAL CONFERENCE ON APPLIED ENERGY (ICAE2016)

SE Energy Procedia

LA English

DT Proceedings Paper

CT 8th International Conference on Applied Energy (ICAE)

CY OCT 08-11, 2016

CL Beijing Inst Technol, Beijing, PEOPLES R CHINA

SP Appl Energy Innovat Inst, Malardalen Univ, China Assoc Sci & Technologies, HOME Program, Sichuan  
Univ, Jiangsu Univ, China Univ Min & Technol, Tianjin Univ, Tongji Univ, SW Jiaotong Univ, Xian  
Jiaotong Univ, Collaborat Innovat Ctr Elect Vehicles Beijing, Technol Unnovat Local Scale Optimum

Integrat Battery Energy Storage, BAIC, BJEV, YuTong, Shenwu Grp

HO Beijing Inst Technol

DE household consumption; energy consumption; input-output analysis; energy  
conservation

ID EMISSION

AB The household sector has become the second largest consumer of final energy, ranking only next to the  
industrial sector in China. Except for the direct energy consumption of household sector, people's



consumption activities also indirectly affect the energy consumption of multiple production sectors. This paper investigates the direct and indirect impact of household consumption activities on energy consumption in China from the consumers' lifestyle perspective based on the input-output analysis. The results show that China's energy consumption caused by household consumption activities in 2012 accounts for 24.7% of the total final energy consumption. The indirect energy consumption of household consumption activities is 1.35 times more than the direct energy consumption. Residential activities cause the most indirect energy consumption, while the smelting and pressing industry of ferrous metal is the most energy-consuming industrial sector influenced by household consumption. We also find that the low-carbon pattern and accelerated technological advance can reduce the indirect energy consumption effectively by scenario analysis. (C) 2017 The Authors. Published by Elsevier Ltd.

C1 [Ding, Qun; Cai, Wenjia; Wang, Can] Tsinghua Univ, Minist Educ, Key Lab Earth Syst Modeling, Room 5925, Meng Minwei Sci Bldg, Beijing 100084, Peoples R China.

[Ding, Qun; Cai, Wenjia; Wang, Can] Tsinghua Univ, Ctr Earth Syst Sci, Room 5925, Meng Minwei Sci Bldg, Beijing 100084, Peoples R China.

[Wang, Can] Tsinghua Univ, SKLESPC, Beijing 100084, Peoples R China.

[Wang, Can] Tsinghua Univ, Sch Environm, Beijing 100084, Peoples R China.

RP Cai, WJ (reprint author), Tsinghua Univ, Minist Educ, Key Lab Earth Syst Modeling, Room 5925, Meng Minwei Sci Bldg, Beijing 100084, Peoples R China.; Cai, WJ (reprint author), Tsinghua Univ, Ctr Earth Syst Sci, Room 5925, Meng Minwei Sci Bldg, Beijing 100084, Peoples R China.

EM wcai@tsinghua.edu.cn

OI Cai, Wenjia/0000-0002-4436-512X

CR An Hongyu, 2012, MEET 2020 CHINESE CO

Bin S, 2005, ENER POLICY, V33, P197, DOI 10.1016/S0301-4215(03)00210-6

Mongelli I, 2006, ENER POLICY, V34, P88, DOI 10.1016/j.enpol.2004.06.004

Qi Ye, 2016, ANN REV LOW CARBON D

Wei YM, 2007, ENER POLICY, V35, P247, DOI 10.1016/j.enpol.2005.11.020

Zhang XL, 2015, J CLEAN PROD, V103, P873, DOI 10.1016/j.jclepro.2015.04.024

Zhang YC, 2016, J BUS ETHICS, V139, P455, DOI 10.1007/s10551-015-2657-6

NR 7

TC 0

Z9 0

U1 1

U2 1

PU ELSEVIER SCIENCE BV

PI AMSTERDAM

PA SARA BURGERHARTSTRAAT 25, PO BOX 211, 1000 AE AMSTERDAM, NETHERLANDS

SN 1876-6102

J9 ENRGY PROCED

PY 2017

VL 105

BP 3384

EP 3390

DI 10.1016/j.egypro.2017.03.767

PG 7

WC Energy & Fuels

SC Energy & Fuels

GA BIOMH

UT WOS:000404967903073

OA gold

DA 2018-05-03

ER

PT J

AU Enshassi, A

Elzebdeh, S

Mohamed, S

AF Enshassi, Adnan

Elzebdeh, Salam

Mohamed, Sherif

TI Drivers affecting household residents' water and related energy consumption in residential buildings

SO INTERNATIONAL JOURNAL OF BUILDING PATHOLOGY AND ADAPTATION

LA English

DT Article

DE Consumption; Residential buildings; Energy; Households; Water

ID GAZA-STRIP; URBAN WATER; END-USE; CONSERVATION; DEMAND; ATTITUDES; BEHAVIOR; RECLAMATION; MANAGEMENT

AB Purpose - The Gaza Strip in Palestine is suffering from a shortage of water and energy. To manage the current situation and address future issues, practical approaches need to be adopted to enhance water and energy efficiency. The purpose of this paper is to elicit professionals' perceptions of the drivers affecting water and related energy consumption in residential buildings in the Gaza Strip.

Design/methodology/approach - In total, 19 drivers were identified from previous research and modified according to the results of a pilot study. These drivers were ranked under a Relative Importance Index (RII). A questionnaire survey was then administered and non-random purposive sampling used. The population of this study comprised stakeholders, including the United Nation Refugee Work Agency, Gaza Strip Governorates Municipalities, and the Coastal Municipalities Water Utility.

Findings - The results of all drivers (i.e. RII = 71.43 per cent, mean = 3.57) indicated that the respondents agreed about which drivers were affecting water and energy consumption. The sign Test-value was a positive 4.55 and the p-value was 0.000 (i.e. smaller than the level of significance  $\alpha = 0.050$ ). The means of these drivers differed significantly and were greater than the hypothesised value of 3. Accordingly, it was concluded that the drivers investigated significantly affected household residents' consumption of water and energy in residential buildings. The study revealed that climate changes, knowledge of how to conserve water and energy and household size were the most important drivers affecting household residents' consumption of water and related energy in residential buildings.

Practical implications - The study will assist the parties concerned about water and energy use to be aware and understand the drivers affecting water and related energy the consumption in order to provide household residents with the necessary knowledge to ensure conservation and sustainability. Although this study related to a narrow geographical area in Palestine, the findings could be useful to similar locations in the Middle East and Africa.

Originality/value - This research demonstrates the drivers affecting water and related energy the consumption in residential buildings in the Gaza Strip which is considered the first study in Palestine and in the region. The study provides a useful platform for the development of appropriate water and energy strategies in Palestine and other similar geographical locations in the Middle East.

C1 [Enshassi, Adnan; Elzebedeh, Salam] Islamic Univ Gaza, Dept Civil Engn, Gaza, Palestine.

[Mohamed, Sherif] Griffith Univ, Griffith Sch Engn, Nathan, Qld, Australia.

RP Enshassi, A (reprint author), Islamic Univ Gaza, Dept Civil Engn, Gaza, Palestine.

EM aenshassi@gmail.com

OI Mohamed, Sherif/0000-0002-8967-6212

CR Abu-Jasser A., 2012, P 4 INT ENG C ENG 21, P1

AITKEN CK, 1994, J APPL SOC PSYCHOL, V24, P136, DOI 10.1111/j.1559-1816.1994.tb00562.x

Akinbami J.F., 2009, P 5 URB RES S CIT CL

Al-Ghuraiz Y, 2006, BUILD ENVIRON, V41, P1243, DOI 10.1016/j.buildenv.2005.04.028

Almutaz I., 2012, INT J PHYS SERV, V7, P5787

Bartusch Cajs, 2011, Information Design Journal, V19, P3, DOI 10.1075/idj.19-1-02bar

Bohannon J, 2006, SCIENCE, V313, P1085, DOI 10.1126/science.313.5790.1085

Boughen N., 2013, UNDERSTANDING RESIDE

Breyer E.Y., 2014, THESIS

Cheng CL, 2002, ENER BUILDINGS, V34, P261, DOI 10.1016/S0378-7788(01)00097-4

Cheng H., 2012, WATER ENERGY C UNPUB

CIA, 2011, CIA WORLD FACTB

Connell D, 2011, WATER RESOUR RES, V47, DOI 10.1029/2010WR009820

Corral-Verdugo V, 2002, ENVIRON MANAGE, V30, P527, DOI 10.1007/s00267-002-2599-5

Dagnew D.C., 2012, THESIS

de Oliver M, 1999, ENVIRON BEHAV, V31, P372, DOI 10.1177/00139169921972155

Deverill P., 2001, SHARING IT OUT INTRO, P1

Domene E, 2006, URBAN STUD, V43, P1605, DOI 10.1080/00420980600749969

- EEA, 2012, 12012 EEA, P74
- Elias-Maxil JA, 2014, RENEW SUST ENERG REV, V30, P808, DOI 10.1016/j.rser.2013.10.007
- Enshassi A, 2000, BUILD ENVIRON, V35, P273, DOI 10.1016/S0360-1323(99)00017-7
- Enshassi A., 2007, J CIV ENG MANAG, V134, P245
- Enshassi A., 2005, BARRIERS APPL SUSTAI
- Enshassi A, 2009, J FINANC MANAG PROP, V14, P126, DOI 10.1108/13664380910977592
- Enshassi A, 2009, J CIV ENG MANAG, V15, P269, DOI 10.3846/1392-3730.2009.15.269-280
- Estrada M., 2013, EVERY DROP COUNTS UC
- Fan L., 2013, J PLOS ONE, V8, P1
- Fellows R, 2008, RES METHODS CONSTRUC
- Fielding K., 2012, WATER RESOUR RES, V48, P1, DOI DOI 10.1029/2012WR012398
- Fielding K., 2012, 93 URB WAT SEC RES A, P1
- Gilg A, 2006, ECOL ECON, V57, P400, DOI 10.1016/j.ecolecon.2005.04.010
- Gregory GD, 2003, J APPL SOC PSYCHOL, V33, P1261, DOI 10.1111/j.1559-1816.2003.tb01949.x
- Hamdan LK, 2008, RENEW ENERG, V33, P1137, DOI 10.1016/j.renene.2007.10.002
- Hong C., 2014, INT J GEOSPATIAL ENV, V1
- Hurlimann A, 2009, J ENVIRON MANAGE, V91, P47, DOI 10.1016/j.jenvman.2009.07.014
- Inman D., 2006, URBAN WATER J, V3, P127, DOI DOI 10.1080/15730620600961288
- Jiang Z. M., 2008, J SHANGHAI JIAOTONG, V13, P257
- Jones N, 2011, WATER RESOUR MANAG, V25, P509, DOI 10.1007/s11269-010-9711-z
- Jorgensen B, 2009, J ENVIRON MANAGE, V91, P227, DOI 10.1016/j.jenvman.2009.08.009
- Lee M. J, 2011, THESIS
- Lipchin C, 2006, NATURAL RESOURCES MA
- Lorek S, 2004, HOUSEHOLD ENERGY WAT
- Mahmood F, 2013, J ECON LIT, V1, P1
- Mayer P.W., 1999, RESIDENTIAL END USES, P1
- Moreira D.F., 2013, J APPL MATH, V2013, P1
- Vilanova MRN, 2014, RENEW SUST ENERG REV, V30, P701, DOI 10.1016/j.rser.2013.11.024
- PCBS, 2016, PAL FIG 2015
- Plappally AK, 2012, RENEW SUST ENERG REV, V16, P4818, DOI 10.1016/j.rser.2012.05.022
- Polit DF BC, 2004, NURSING RES PRINCIPL
- Renwick ME, 2000, J ENVIRON ECON MANAG, V40, P37, DOI 10.1006/jeem.1999.1102
- Romano G, 2014, WATER-SUI, V6, P2929, DOI 10.3390/w6102929
- Santin OG, 2009, ENERG BUILDINGS, V41, P1223, DOI 10.1016/j.enbuild.2009.07.002
- Saravanan V.K., 2011, THESIS
- Savenije HHG, 2002, WATER INT, V27, P98, DOI 10.1080/02508060208686982
- Schleich J, 2009, ECOL ECON, V68, P1756, DOI 10.1016/j.ecolecon.2008.11.012
- Serret Y., 2014, OECD ENV WORKING PAP, V79
- Statzu V., 2009, WATER DEMAND RESIDEN
- Syme GJ, 2000, EVALUATION REV, V24, P539, DOI 10.1177/0193841X0002400601
- UNIDO, 2011, IND EN EFF SUST WEAL
- Vassileva I., 2012, THESIS
- Weissman S., 2009, J ENERGY NATURAL RES, V22, P257
- Werner B., 2012, 12012 OFF OFF PUBL E, P1
- Willis RM, 2011, J ENVIRON MANAGE, V92, P1996, DOI 10.1016/j.jenvman.2011.03.023
- Wolters EA, 2014, SOC SCI J, V51, P455, DOI 10.1016/j.soscij.2013.10.003
- Worthington AC, 2008, J ECON SURV, V22, P842, DOI 10.1111/j.1467-6419.2008.00551.x
- Yaseen E.B.T.Q., 2008, THESIS
- Yu BY, 2011, ENERG POLICY, V39, P4168, DOI 10.1016/j.enpol.2011.04.024

NR 67

TC 0

Z9 0

U1 4

U2 4

PU EMERALD GROUP PUBLISHING LTD

PI BINGLEY

PA HOWARD HOUSE, WAGON LANE, BINGLEY BD16 1WA, W YORKSHIRE, ENGLAND

SN 2398-4708

J9 INT J BUILD PATHOL

J1 Int. J. Build. Pathol. Adapt.

PY 2017

VL 35

IS 2

BP 159

EP 175

DI 10.1108/IJBPA-01-2017-0002

PG 17

WC Construction & Building Technology

SC Construction & Building Technology

GA FC6SF

UT WOS:000406971100004

DA 2018-05-03

ER

PT S

AU Ertugrul, N

McDonald, CE

Makestas, J

AF Ertugrul, Nesimi

McDonald, Cathryn E.

Makestas, John

GP IEEE

TI Home Energy Management System for Demand-Based Tariff Towards Smart  
Appliances in Smart Grids

SO 2017 IEEE 12TH INTERNATIONAL CONFERENCE ON POWER ELECTRONICS AND DRIVE  
SYSTEMS (PEDS)

SE International Conference on Power Electronics and Drive Systems

LA English

DT Proceedings Paper

CT IEEE 12th International Conference on Power Electronics and Drive  
Systems (PEDS)

CY DEC 12-15, 2017

CL Honolulu, HI

SP IEEE, PEDS, IEEE POWER ELECT SOC, IND APPLICAT SOC, Univ Hawaii, HawatiTourism Author

DE Expert systems; heuristic algorithms; load management; smart grids;  
smart homes; energy management; demand based tariff

AB The peak demand placed on an electricity network can be reduced using a demand-based tariff, in which part of a customer's electricity bill is dependent on their maximum demand reached over a period of time. This paper reviews the state of the associated technologies, and it offers a smart grid hardware and software solution to achieve a home energy management system to assist electricity users to reduce their maximum demand. The method uses the application of the standards for demand response capabilities of electrical products, in combination with plug-in switching modules placed between any mains-powered appliance and the power point. The software system uses a heuristic algorithm that takes actions to achieve the target limit while causing the least inconvenience possible to the user. A prototype system has been developed and demonstrated using a simulated data that the maximum demand in a simulated household can be reduced significantly.

C1 [Ertugrul, Nesimi; McDonald, Cathryn E.; Makestas, John] Univ Adelaide, Sch Elect & Elect Engr, Adelaide, SA, Australia.

RP Ertugrul, N (reprint author), Univ Adelaide, Sch Elect & Elect Engr, Adelaide, SA, Australia.

EM nesimi.ertugrul@adelaide.edu.au

FU SA Power Networks, Digital Home Systems, ARENA

FX The authors would like to acknowledge the supports provided from SA  
Power Networks, Digital Home Systems, ARENA sponsored Australian Energy  
Storage Knowledge Bank project and the technical staff at the School of  
Electrical and Electronic Engineering.

CR [Anonymous], 2014, 475531 ASNZS

Asare-Bediako B., 2012, 47 INT U POW ENG C L  
 Asare-Bediako B, 2013, 4 IEEE PES INN SMART  
 Beaudin M, 2015, RENEW SUST ENERG REV, V45, P318, DOI 10.1016/j.rser.2015.01.046  
 Business Requirements Work Group (National Smart Metering Program), 2011, SMART MET INFR MIN F  
 Devidas A AR, 2013, INT C ADV COMP COMM  
 Dlodlo N., 2013, DEMAND SIDE SMART DO  
 Faruqui A, 2010, J REGUL ECON, V38, P193, DOI 10.1007/s11149-010-9127-y  
 Gyamfi S., 2015, RENEW SUST ENERG REV, P71  
 Hu QR, 2013, IEEE T SMART GRID, V4, P1878, DOI 10.1109/TSG.2013.2258181  
 Hussain S, 2014, IEEE 4 INT C BIG DAT  
 Kim H, 2012, COMPUT COMMUN, V36, P51, DOI 10.1016/j.comcom.2012.01.007  
 Pipattanasomporn M., IEEE T SMART GRID, V5, P742  
 Riess P. C., 2005, REV ECON STUD, P851  
 Siano P, 2013, J AMB INTEL HUM COMP, V4, P651, DOI 10.1007/s12652-013-0176-9  
 Son YS, 2010, IEEE T CONSUM ELECTR, V56, P1380, DOI 10.1109/TCE.2010.5606273  
 StatSoft Inc., EL STAT TXB CLUST AN  
 Stoft S., 2002, POWER SYSTEM EC DESI  
 U.S. Department of Energy, 2006, BEN DEM RESP EL MARK  
 [Anonymous], 2007, 4755 ASNZS

NR 20  
 TC 0  
 Z9 0  
 U1 0  
 U2 0  
 PU IEEE  
 PI NEW YORK  
 PA 345 E 47TH ST, NEW YORK, NY 10017 USA  
 SN 2164-5256  
 BN 978-1-5090-2364-6  
 J9 INT C POWER ELECT DR  
 PY 2017  
 BP 511  
 EP 517  
 PG 7  
 WC Engineering, Electrical & Electronic  
 SC Engineering  
 GA BJ6WM  
 UT WOS:000426968800086  
 DA 2018-05-03  
 ER  
 FN Clarivate Analytics Web of Science  
 VR 1.0  
 PT B  
 AU Fratu, M  
     Cirstlovean, L  
 AF Fratu, Mariana  
     Cirstlovean, Lucian  
 GP IEEE  
 TI Information Modelling for Energy Efficiency in Intelligent Buildings  
 SO 2017 INTERNATIONAL CONFERENCE ON OPTIMIZATION OF ELECTRICAL AND  
     ELECTRONIC EQUIPMENT (OPTIM) & 2017 INTL AEGEAN CONFERENCE ON ELECTRICAL  
     MACHINES AND POWER ELECTRONICS (ACEMP)  
 LA English  
 DT Proceedings Paper  
 CT International Conference on Optimization of Electrical and Electronic  
     Equipment (OPTIM) / Intl Aegean Conference on Electrical Machines and  
     Power Electronics (ACEMP)  
 CY MAY 25-27, 2017

CL Transilvania Univ Brasov, Brasov, ROMANIA

SP Univ Politehnica Timisoara, Tech Univ Cluj Napoca, Middle E Tech Univ Ankara, Inst Elec & Elect Engineers, IEEE Ind Elect Soc, IEEE Ind Applicat Soc, IEEE Power Elect Soc, Inst Elect Engineers Japan, Korean Inst Power Elect

HO Transilvania Univ Brasov

ID BIM

AB In this article one examine the topic of Building Information Modeling (BIM) from the perspective of the residential building' owners. We present a novel approach to estimate of energy consumption through the identification of the relevant parameters and the application of Soft Computing techniques.

The residential buildings must be capable of not only providing mechanisms to minimize their energy consumption, but also integrating their own energy sources to ensure their energy sustainability.

We characterize the building in terms of its contextual features and energy consumption, and then select the most appropriate techniques to generate the most accurate model charged with energy rationalization.

The innovative technologies would need to ensure that the owners achieve management tool to provide advanced energy management of intelligent built environment, where smart objects, as well as distributed energy resources are installed.

C1 [Fratu, Mariana; Cirstolovean, Lucian] Transilvania Univ Brasov, Brasov, Romania.

RP Fratu, M (reprint author), Transilvania Univ Brasov, Brasov, Romania.

EM mariana.fratu@unitbv.ro

CR Aciu L. E., 2012, P INT S DES TECHN EL, P173

Gonzalez-Vidal A, 2016, PROCEDIA COMPUT SCI, V83, P994, DOI 10.1016/j.procs.2016.04.213

International Energy Agency-Sustainable Buildings, 2016, SUST BUILD

Jiang YF, 2015, J INF TECHNOL CONSTR, V20, P518

Liu F., 2014, P 15 INT C COMP CIV

Mamidi S., 2012, AAMAS, V1, P45

Matejka P, 2016, PROCEDIA ENGINEER, V164, P550, DOI 10.1016/j.proeng.2016.11.657

Moon H. J., 2011, P 12 C INT BUILD PER

Romanca M, 2008, PROCEEDINGS OF THE 11TH INTERNATIONAL CONFERENCE ON OPTIMIZATION OF ELECTRICAL AND ELECTRONIC EQUIPMENT, VOL IV, P191

Swan L.G., 2009, RENEW SUST ENERG REV, V13, P1819

Teicholz P., 2013, BIM FACILITY MANAGER, P332

Terreno S., 2015, Computing in Civil Engineering 2015. International Workshop on Computing in Civil Engineering. Proceedings, P675

Yan H., 2008, P 12 INT C COMP CIV

Zhang JC, 2015, BUILDINGS, V5, P100, DOI 10.3390/buildings5010100

Zhang SJ, 2013, AUTOMAT CONSTR, V29, P183, DOI 10.1016/j.autcon.2012.05.006

NR 15

TC 0

Z9 0

U1 1

U2 1

PU IEEE

PI NEW YORK

PA 345 E 47TH ST, NEW YORK, NY 10017 USA

BN 978-1-5090-4489-4

PY 2017

BP 917

EP 922

PG 6

WC Engineering, Electrical & Electronic

SC Engineering

GA BJ6PY

UT WOS:000426909600142

DA 2018-05-03

ER

PT J

AU Lancheros-Cuesta, DJ

Lara, DP  
Lopez, MB  
Garcia, GM

AF Janeth Lancheros-Cuesta, Diana

Perez Lara, Diego  
Bueno Lopez, Maximiliano  
Marulanda Garcia, Geovanny

TI Monitoring platform for the consumption of electricity in a home  
SO INTERNATIONAL JOURNAL OF WEB INFORMATION SYSTEMS

LA English

DT Article

DE Advanced Web applications; Energy consumption; Monitoring system; Smart sensor

AB Purpose - Nowadays, an extra consumption of electric energy in the Colombian houses is generated due to electric or electronic elements plugged into the electric network. This fact produces a cost overrun in the user's electricity bills. To reduce this extra cost, and also with a plus of reducing greenhouse gas emission, a monitoring system for the consumption of electric energy in a household will be designed and implemented to make electricity users realize how much money and energy is being wasted due to the unnecessary electric elements plugged into the network. This paper aims to show a monitoring system that allows the client to supervise the consumption of some appliances inside his/her home, remotely. It is also considered the HMI to be able to log in, choose the intervals of data and generate reports and graphics. The monitoring system is based on the integration of several technologies that are already used and implemented in houses and buildings, such as: measuring and treatment of data electronically using microcontrollers, Wi-Fi technology and dynamic graphic interface (website).

Design/methodology/approach - The methodology consists of several tasks, starting from documentation of the variables, instrumentation and methods for getting to the solution; the first part of the methodology focuses on selecting the electric and/or electronic elements to be monitored, so the instrumentation is able to monitor. Then, the power stage was implemented in this stage to measure signals from the sensors while sensing the electric nodes are adjusted, so does the transmission and reception. In the third stage, the design information system was implemented; this is where the received data from the sensors are stored and managed for further organization and visualization. Activities included the following: Analysis of the model of use cases: Identification of actors and actions that are involved in the system. Server selection: Study of the different server to manage the database. Design of the database: The variables, tables, fields, profiles are determined for managing the information. Connection between sensors and database: Correct data transmission and managing to the database from the sensors. Finally, the system is validated in a rural house for a month.

Findings - The monitoring system satisfies the main objective of making a tracing of the behavior of some appliances inside a house, showing graphically the instant current generated while connected, the cumulated energy consumed and the cost in Colombian pesos of the energy consumed so far, in real time.

Research limitations/implications - The monitoring system requires the correct functioning of the sensors connected to each household appliance in the home.

Practical implications - The main approach in the monitoring platform is the real-time measurement of energy consumption by nodes (in each appliance) that allows the user to control the money. The innovative impact of the project will be based on the use of hardware and information systems in the measurement of electrical consumption.

Social implications - This research has a direct impact on the economic aspects of the low-income population by allowing them to manage their energy consumption through the proposed system.

Originality/value - The main approach in the monitoring platform is the real-time measurement of energy consumption by nodes (in each appliance) that allows the user to control the money.

C1 [Janeth Lancheros-Cuesta, Diana; Perez Lara, Diego; Bueno Lopez, Maximiliano; Marulanda Garcia, Geovanny] Univ La Salle, Bogota, Colombia.

RP Lancheros-Cuesta, DJ (reprint author), Univ La Salle, Bogota, Colombia.

EM dilancheros@unisalle.edu.co

OI Bueno Lopez, Maximiliano/0000-0002-7959-9962

CR Ambler S. W., 2014, AGILE MODELING

Antonino-Daviu JA, 2009, IEEE T IND APPL, V45, P1794, DOI 10.1109/TIA.2009.2027558

Arduino, 2015, OBT DE ARD

Barros J, 2008, IEEE T INSTRUM MEAS, V57, P63, DOI 10.1109/TIM.2007.910101

Basic Electronic Tutorials, 2015, OBT BAS EL TUT  
 Carballar J., 2004, WI FI COMO CONSTRUIR  
 Comment Ca Marche, 2015, OBT DE CCM  
 Cruz Y., 2013, THESIS  
 ECLAC, 2008, COM EC AM LAT CAR  
 Elmasri R., 2002, FUNDAMENTOS BASES DA  
 Erwin Z., 2011, QWHATIS  
 Espressif Systems, 2013, NURDSP  
 Kulia G, 2016, PROCEDIA ENGINEER, V159, P94, DOI 10.1016/j.proeng.2016.08.070  
 Li P, 2016, J MOD POWER SYST CLE, V4, P19, DOI 10.1007/s40565-016-0188-5  
 Lopez J. Galan, 2014, THESIS  
 Ministry of Mines and Energy, 2007, UN PLAN MIN EN  
 Huang Norden E, 2014, HILBERT HUANG TRANSF, P1  
 Object Management Group, 2015, OBT DE OMG  
 Peralta J. D. Martinez, 2013, SISTEMA MONITOREO AD  
 Rodriguez J. D. Martinez, 2010, DISENO SISTEMA DOMOT  
 Rozo G. A. Santos, 2009, THESIS  
 Secretaria General de la Alcaldia de Bogota, 1994, ALC DE BOG  
 Silberschatz Korth, 2007, FUNDAMENTOS DISENO B  
 Toole JMO, 2008, IEEE T SIGNAL PROCES, V56, P5427, DOI 10.1109/TSP.2008.929325  
 Williams A.B., 1988, AMPLIFICADORES OPERA  
 NR 25  
 TC 0  
 Z9 0  
 U1 1  
 U2 1  
 PU EMERALD GROUP PUBLISHING LTD  
 PI BINGLEY  
 PA HOWARD HOUSE, WAGON LANE, BINGLEY BD16 1WA, W YORKSHIRE, ENGLAND  
 SN 1744-0084  
 EI 1744-0092  
 J9 INT J WEB INF SYST  
 JI Int. J. Web Inf. Syst.  
 PY 2017  
 VL 13  
 IS 3  
 BP 222  
 EP 240  
 DI 10.1108/IJWIS-02-2017-0008  
 PG 19  
 WC Computer Science, Information Systems  
 SC Computer Science  
 GA FJORM  
 UT WOS:000412417100001  
 DA 2018-05-03  
 ER  
  
 PT S  
 AU Jo, HP  
     Kim, HG  
     Kim, SS  
 AF Jo, Haeng Pil  
     Kim, Hye Gi  
     Kim, Sun Sook  
 GP ASHRAE  
 TI Analysis of Energy Consumption in Office Buildings Based on the National  
     Building Energy Database in Korea  
 SO 2017 ASHRAE ANNUAL CONFERENCE PAPERS



SE ASHRAE Conference Papers  
 LA English  
 DT Proceedings Paper  
 CT ASHRAE Annual Conference  
 CY JUN 24-28, 2017  
 CL Long Beach, CA  
 SP ASHRAE

AB Beintranfsing enemy use can help building, owners and managers to assess building energy performance and to identify energy egfficiency opportunities. With the advanced information technologies, many countries have provided databases. tools, and evaluation frameworks to compare building to standards or peer-group and to assess energy performance based on real energy data collection. Energy consumption data make It easy to understand the energy use characteristics of each building, and can promote occupants awareness of building energy efficiency when providing an energy performance developed from these data. As a way of improving energy efficiency in the building sector, the Korean government has developed a nation-wide integrated energy consumption database with more than 6 million building records. The purpose of this paper is to introduce the framework of the national building energy consumption database and to analyze energy use characteristics of office buildings across the couantry. We conducted a multiple regression anarysis to analyse relationships between the office building energy consumption and the independent variable Including building size, building age, etc. in order to identify variable that have a significant influence to energy consumption. Several multiple regression models were developed and then we selected the best model for predicting energy consumption in an building. The regression model shows that a building's gross area, building height and building age have a significant impact on builsing energy consumption. The developed prediction model was used as an equation to calculated predicted energy consumption of existing office buildings in Korea. the prediction model shows a high explanatory power of 93.7%. We compared the actual energy consumption with the predicted energy consumption using the prediction model, and as a result, the error rate shows 18.4%. The prediction model derived from this study could be used to review the effects of energy policies and set a benchmarking for energy performance.

C1 [Jo, Haeng Pil; Kim, Hye Gi; Kim, Sun Sook] Ajou Univ, Dept Architecture, Suwon, South Korea.

RP Jo, HP (reprint author), Ajou Univ, Dept Architecture, Suwon, South Korea.

FU Architecture & Urban Development Research Program - Ministry of Land, Infrastructure and Transport (MOLIT) of Korea government [17AUDP-b079104-04]; Korea Agency for Infrastructure Technology Advancement (KAIA)

FX This research was supported by a grant (17AUDP-b079104-04) from Architecture & Urban Development Research Program funded by Ministry of Land, Infrastructure and Transport (MOLIT) of Korea government and Korea Agency for Infrastructure Technology Advancement (KAIA)

CR Ahn J, 2016, APPL ENERG, V179, P488, DOI 10.1016/j.apenergy.2016.06.065

Aranda A, 2012, ENERG BUILDINGS, V49, P380, DOI 10.1016/j.enbuild.2012.02.040

Baker KJ, 2008, APPL ENERG, V85, P475, DOI 10.1016/j.apenergy.2007.09.004

Bianco V, 2009, ENERGY, V34, P1413, DOI 10.1016/j.energy.2009.06.034

Chung W, 2006, APPL ENERG, V83, P1, DOI 10.1016/j.apenergy.2004.11.003

Jung H.M., 2015, KIAEBS J, V9, P12

Kontokosta CE, 2015, J REAL ESTATE FINANC, V51, P288, DOI 10.1007/s11146-014-9481-0

Morris J, 2016, ENERG EFFIC, V9, P723, DOI 10.1007/s12053-015-9393-8

Park D.J., 2016, THESIS

Ramesh N, 2016, ECOTOX ENVIRON SAFE, V134, P350, DOI 10.1016/j.ecoenv.2015.08.027

Wang SW, 2012, ENERG BUILDINGS, V55, P873, DOI 10.1016/j.enbuild.2012.08.037

Yoo J.H., 2012, LHI J, V3, P263

NR 12

TC 0

Z9 0

U1 0

U2 0

PU AMER SOC HEATING, REFRIGERATING AND AIR-CONDITIONING ENGS

PI ATLANTA

PA 1791 TULLIE CIRCLE NE, ATLANTA, GA 30329 USA

SN 2378-2129

J9 ASHRAE CONF PAPER

PY 2017

PG 8

WC Thermodynamics; Construction & Building Technology

SC Thermodynamics; Construction & Building Technology

GA BJ3WJ

UT WOS:000424438600052

DA 2018-05-03

ER

PT S

AU Kashani, A

Ozturk, Y

AF Kashani, Atieh

Ozturk, Yusuf

GP IEEE

TI Residential Energy Consumer Behavior Modification via Gamification

SO 2017 IEEE 6TH INTERNATIONAL CONFERENCE ON RENEWABLE ENERGY RESEARCH AND APPLICATIONS (ICRERA)

SE International Conference on Renewable Energy Research and Applications

LA English

DT Proceedings Paper

CT 6th IEEE INTERNATIONAL CONFERENCE on RENEWABLE ENERGY RESEARCH and APPLICATIONS (ICRERA 2017)

CY NOV 05-08, 2017

CL San Diego, CA

SP IAS IEEE Ind Applicat Soc, IES, IEEJ, IEICE Commun Soc, KBSoftware, IEEE, IJRER, PELS

DE Demand response; customer behavior modification; energy monitoring; energy economics

AB This paper aims to present an integrated platform to explore the role of society, culture, and behavior in energy efficiency uptake, and identify specific marketing techniques that may result in user behavior modification. We developed a consumer behavior modification framework which monitors consumer energy usage through the SDG&E Green Button API and make recommendations to the consumer. Behavior change is entbrced through energy pricing and showing the impact of the individual consumer's CO2 emissions when using energy at peak hours versus at non-peak hours. The focus is to improve the homeowner's "know" and "care", aiming to influence actions through transformation of moral in addition to monetary savings. Following an engineering and economics model the system provides the tools for research in social variability, as well as the social and cultural context that shapes our habits and practices in energy consumption.

C1 [Kashani, Atieh; Ozturk, Yusuf] San Diego State Univ, Elect & Comp Engn Dept, San Diego, CA 92182 USA.

RP Kashani, A (reprint author), San Diego State Univ, Elect & Comp Engn Dept, San Diego, CA 92182 USA.

EM atieh.kasbani@gmail.com; yozturk@mail.sdsu.edu

FU SDSU Presidential Leadership fund , Department of Energy [DE-EE 0007327]; STEP/FEEDER Network

FX This study is supported in part by SDSU Presidential Leadership fund , Department of Energy DE-EE 0007327, STEP/FEEDER Network.

CR Ryan R. M., 1999, METAANALYTIC REV EXP

Ehrhardt-Martinez K., 2010, PEOPLE CTR INITIATIV

Fleming N., 2012, BBC FUTURE

Ingle A., 2012, ACEEE SUMMER ST

Lutzenhiser L., 2009, BEHAV ASSUMPTIONS UN

Lutzenhiser L., 2012, 2012 ACEEE SUMMER ST

Lutzenhiser L., 2010, 2010 ACEEE SUMMER ST

Lutzenhiser L., 2014, ENERGY RES SOC SCI, V1, P141, DOI 10.1016/j.erss.2014.03.011

Moezzi M., 2010, 2010 ACEEE SUMMER ST

Moezzi M., 2014, ENERGY RES SOC SCI, V1, P30, DOI 10.1016/j.erss.2014.03.014

Onur ELMA, ICRERA 2015  
 Ozturk Y., 2013, IEEE T SMART GRID, V4, P694, DOI 10.1109/TSG.2012.2235088  
 Richter G., 2015, STUDYING GAMIFICATIO  
 Stille Karl Stephan, 2015, ICRERA 2015  
 Ugur Enes, 2013, INT C REN EN RES APP  
 Walker G, 2014, ENERGY RES SOC SCI, V1, P49, DOI 10.1016/j.erss.2014.03.012  
 Wallenborn G, 2014, ENERGY RES SOC SCI, V1, P56, DOI 10.1016/j.erss.2014.03.009  
 Watson Z., 2014, 4 REAL WORLD EXAMPLE  
 Wright D, 2015, PROCEDIA COMPUT SCI, V62, P343, DOI 10.1016/j.procs.2015.08.412  
 Yan X, 2015, PERV COMP COMM WORKS  
 Yan X, GREEN TECHN C GREENT, P132  
 Zichermann G., 2011, GAMIFICATION DESIGN  
 [Anonymous], 2014, IDC ENERGY INSIGHTS

NR 23

TC 0

Z9 0

U1 0

U2 0

PU IEEE

PI NEW YORK

PA 345 E 47TH ST, NEW YORK, NY 10017 USA

SN 2377-6897

BN 978-1-5386-2095-3

J9 INT CONF RENEW ENERG

PY 2017

BP 1217

EP 1221

PG 5

WC GREEN & SUSTAINABLE SCIENCE & TECHNOLOGY; Energy & Fuels; Engineering,  
 Electrical & Electronic

SC Science & Technology - Other Topics; Energy & Fuels; Engineering

GA BJ6IE

UT WOS:000426708600207

DA 2018-05-03

ER

PT S

AU Kim, YY

Sun, C

AF Kim, Yuliya

Sun, Cheng

BE Cui, W

Rusu, E

TI The Energy-Efficient Adaptation Scheme for Residential Buildings in  
 Kazakhstan

SO 2017 2ND INTERNATIONAL CONFERENCE ON ADVANCES ON CLEAN ENERGY RESEARCH  
 (ICACER 2017)

SE Energy Procedia

LA English

DT Proceedings Paper

CT 2nd International Conference on Advances on Clean Energy Research  
 (ICACER)

CY APR 07-09, 2017

CL Berlin, GERMANY

DE adaptation; green building; reduce energy consumption; strategy

ID OPTIMIZATION

AB Green building is a system of interaction between climate, and the natural source has energy property,  
 harmony with nature. Due to the cold climate of Kazakhstan, the issue of energy consumption of

residential buildings is more important. Energy consumption of buildings in this region is more than half of the total. The system optimizes, must apply the theoretical analysis of research related to current problems.

More efficient use of the construction of residential buildings and reduce energy consumption. To expand and develop creative, original architectural design ideas, principles, and methods. Application of green technology in the territory of Kazakhstan in the first step can be carried out by passive energy conservation.

The results, theoretical model, adapt to green standards in Kazakhstan and planned development model. The adaptation of green technology is possible to represent framework. For a more detailed analysis and further research. (C) 2017 The Authors. Published by Elsevier Ltd

C1 [Kim, Yuliya; Sun, Cheng] Harbin Inst Technol, Sch Architecture, Heilongjiang Cold Reg Architectural Sci Key Lab, Harbin 150001, Heilongjiang, Peoples R China.

RP Kim, YY (reprint author), Harbin Inst Technol, Sch Architecture, Heilongjiang Cold Reg Architectural Sci Key Lab, Harbin 150001, Heilongjiang, Peoples R China.

EM yuliyakim8610@yahoo.com

FU National Natural Science Foundation of China [51578172]

FX The paper supported by National Natural Science Foundation of China (51578172)

CR Aksoy U., 2005, BUILD ENVIRON, V41, P1742

Barbosa R, 2016, INT J CLIMA IN PRESS

Berardi Umberto, 2008, SUSTAINABLE CONSTRUC

Chiu M.L., 2005, INSIGHTS SMART ENV, P17

Coley DA, 2002, BUILD ENVIRON, V37, P1241, DOI 10.1016/S0360-1323(01)00106-8

Emmerich S J, 2016, INT J VENT, V12, P331

Kalyanmoy D, 2001, MULTIOBJECTIVE OPTIM

Lu YH, 2015, ENERG BUILDINGS, V89, P61, DOI 10.1016/j.enbuild.2014.12.032

Mcarthur J J, 2016, SUSTAINABLE CITIES S

Papamichael K., 1999, BUILDING RES INFORM

Penna P., 2016, MULTIOBJECTIVES OPTI

Shaikh PH, 2013, AUSTR J BASIC APPL S, V7, P137

Sinopoli J., SMART BUILDINGS MAKE

Tokbolat S, 2013, J SOL ENERG-T ASME, V135, DOI 10.1115/1.4025427

Yan CC, 2016, RENEW ENERG, V85, P880, DOI 10.1016/j.renene.2015.07.023

NR 15

TC 0

Z9 0

U1 0

U2 0

PU ELSEVIER SCIENCE BV

PI AMSTERDAM

PA SARA BURGERHARTSTRAAT 25, PO BOX 211, 1000 AE AMSTERDAM, NETHERLANDS

SN 1876-6102

J9 ENRGY PROCED

PY 2017

VL 118

BP 28

EP 34

DI 10.1016/j.egypro.2017.07.005

PG 7

WC GREEN & SUSTAINABLE SCIENCE & TECHNOLOGY; Energy & Fuels

SC Science & Technology - Other Topics; Energy & Fuels

GA BJ2DW

UT WOS:000419168400004

OA gold

DA 2018-05-03

ER

PT J

AU Kneifel, J

O'Rear, E

AF Kneifel, Joshua

O'Rear, Eric

TI Reducing the impacts of weather variability on long-term building energy performance by adopting energy-efficient measures and systems: a case study

SO JOURNAL OF BUILDING PERFORMANCE SIMULATION

LA English

DT Article

DE low-energy; net-zero energy; weather variability; sensitivity analysis; whole-building simulation; EnergyPlus

ID CLIMATE-CHANGE; NET-ZERO; CONSUMPTION; DESIGN; HOUSE

AB This case study uses whole-building simulation software to investigate the ability of alternative sets of energy conservation measures to limit the sensitivity in energy use and heating, ventilation, and air-conditioning (HVAC) peak electricity demands by residential buildings due to weather variability. Four alternative building designs are considered: a net-zero energy design based on the National Institute of Standards and Technology (NIST) net-zero energy residential test facility (NZERTF), a comparable, yet less efficient design built according to the 2015 International Energy Conservation Code (IECC), and two low-energy designs at varying levels of energy-efficiency. The findings from this study reveal which measures best ensure robust annual energy performance and occupant comfort by low- and net-zero energy homes given weather variability, as well as how much resulting energy performances vary across the sets of conservation measures considered in this work.

C1 [Kneifel, Joshua; O'Rear, Eric] NIST, 100 Bur Dr, Gaithersburg, MD 20899 USA.

RP O'Rear, E (reprint author), NIST, 100 Bur Dr, Gaithersburg, MD 20899 USA.

EM eric.orear@nist.gov

CR ASHRAE, 2012, 2012 ASHRAE HDB FUND

[Anonymous], 2010, 552010 ASHRAE

Attia S, 2012, ENER BUILDINGS, V49, P2, DOI 10.1016/j.enbuild.2012.01.028

Bloom B., 2011, J SUSTAINABLE REAL E, V3, P109

Clarke J. A., 2001, ENERGY SIMULATION BU

Coley D, 2012, BUILD ENVIRON, V55, P159, DOI 10.1016/j.buildenv.2011.12.011

Crawley DB, 2000, ASHRAE J, V42, P49

Crawley DB, 1998, ASHRAE T, V104, P498

de Wilde P, 2014, AUTOMAT CONSTR, V41, P40, DOI 10.1016/j.autcon.2014.02.009

De Wilde P., 2009, IDENTIFICATION KEY F

Dirks JA, 2015, ENERGY, V79, P20, DOI 10.1016/j.energy.2014.08.081

Fanney AH, 2015, ENER BUILDINGS, V101, P95, DOI 10.1016/j.enbuild.2015.05.002

Hendron R., 2010, BUILDING AM HOUSE SI

Hong T., 2013, P 13 C INT BUILD PER

ICC (International Code Council), 2015, 2015 INT EN CONS COD

Kneifel J., 2015, NIST SPECIAL PUBLICA, V1187

Kneifel J, 2012, 1767 NIST

Kneifel J., 2016, NIST SPECIAL PUBLICA, V1204

Kneifel J., 2015, NIST SPECIAL PUBLICA, V1182

Lstiburek J., 2010, INSIGHT, V30, P1

Maile T, 2007, 107 CIFE, V107, P1

Ng LC, 2016, APPL THERM ENG, V96, P151, DOI 10.1016/j.applthermaleng.2015.10.100

Pettit B., 2014, DESIGN CHALLENGES NI

Radhi H, 2009, BUILD ENVIRON, V44, P2451, DOI 10.1016/j.buildenv.2009.04.006

Robert A, 2012, BUILD ENVIRON, V55, P150, DOI 10.1016/j.buildenv.2011.12.014

Tian W, 2011, AUTOMAT CONSTR, V20, P1096, DOI 10.1016/j.autcon.2011.04.011

Turner C., 2008, ENERGY PERFORMANCE L

U. S. Department of Energy (DOE), 2015, EN SIM SOFTW VERS 8

U. S. Department of Energy (DOE), DOE ZER EN READ HOM

U.S. Department of Energy (DOE), 2015, DOE REL COMM DEF ZER

U. S. Department of Energy, 2015, MONTHL EN REV DEC 20

USGBC Research Committee, 2008, NATL GREEN BUILDING

Wan KKW, 2012, APPL ENERG, V97, P274, DOI 10.1016/j.apenergy.2011.11.048  
Wang LP, 2012, ENERG BUILDINGS, V53, P152, DOI 10.1016/j.enbuild.2012.06.017  
Wang LP, 2009, ENERG BUILDINGS, V41, P1215, DOI 10.1016/j.enbuild.2009.07.001  
Weather Analytics, 2014, ACT MET YEAR AM FORM

NR 36

TC 0

Z9 0

U1 3

U2 6

PU TAYLOR & FRANCIS LTD

PI ABINGDON

PA 2-4 PARK SQUARE, MILTON PARK, ABINGDON OR14 4RN, OXON, ENGLAND

SN 1940-1493

EI 1940-1507

J9 J BUILD PERFORM SIMU

J1 J. Build. Perf. Simul.

PD JAN

PY 2017

VL 10

IS 1

SI SI

BP 58

EP 71

DI 10.1080/19401493.2016.1256431

PG 14

WC Construction & Building Technology

SC Construction & Building Technology

GA EF6GS

UT WOS:000390429700005

DA 2018-05-03

ER

PT S

AU Leong, XW

Essah, EA

AF Leong, Xi Wen

Essah, Emmanuel A.

BE Geving, S

Time, B

TI Bridging the gap between energy consumption and the indoor environmental quality of a 1960s educational building

SO 11TH NORDIC SYMPOSIUM ON BUILDING PHYSICS (NSB2017)

SE Energy Procedia

LA English

DT Proceedings Paper

CT 11th Nordic Symposium on Building Physics (NSB)

CY JUN 11-14, 2017

CL Trondheim, NORWAY

SP Norwegian Univ Sci & Technol, SINTEF

DE University Library; Energy; Indoor Environmental Quality; Modelling

AB The fundamental purpose of a building has evolved from merely providing protection from external environmental climate to more emphasis on integrating building services through building regulations to provide the synergy of comfort, efficiency and safety to the indoor environment. This research recognizes the rising demand and increasing quality of indoor environmental quality (IEQ) in the modern society compared to the acceptable level of previous traditional buildings. Generally due to its varied operations, educational buildings, in this case University libraries have its own set of challenges and barriers such as minimizing damages and decay of books and maintaining indoor conditions with an oversight of providing good IEQ to occupants. This paper presents a detailed evaluation of a 1960s-educational library

with 24-hour access at the University of Reading. Through in-situ measurements, modelling and simulations of the buildings energy consumption, IEQ parameters and occupancy patterns, investigations have been performed. Varied scenarios using the Integrated Environmental Solution (IES) software were also investigated. The findings illustrate that due to mixed facade configuration (i.e. sandstone and bricks) there is the unflinching need to balance aesthetics of the facade and functionality of a building to reduce excessive energy use via heating, without compromising on occupant comfort and well-being. Although it is envisaged that refurbishing the library building will provide energy savings of up to 40%, this is farfetched and can only be achieved at the detriment of occupant comfort levels as evident in the simulation results, where these savings could not be realised. This paper further discusses the methods, scenarios, and results of ensuring good IEQ, comfort and energy efficiency are not been seen as mutually exclusive. This study forms part of ongoing research into the impact of educational buildings. (C) 2017 The Authors. Published by Elsevier Ltd. Peer-review under responsibility of the organizing committee of the 11th Nordic Symposium on Building Physics.

C1 [Leong, Xi Wen; Essah, Emmanuel A.] Univ Reading, Sch Built Environm, Reading RG6 6AW, Berks, England.

RP Essah, EA (reprint author), Univ Reading, Sch Built Environm, Reading RG6 6AW, Berks, England.

EM e.a.essah@reading.ac.uk

CR Akande OK, 2016, FRONT ARCHIT RES, V5, P371, DOI 10.1016/j.foar.2016.06.002

British Standard Institute, 2007, 152512007 BS EN

Carbon Trust, BUILD FUT TOD TRANS

CIBSE, 2006, CIBSE GUID ENV DES

CIBSE, EFF FURTH HIGH ED CO, V54

Gaspar PL, 2015, ENERG BUILDINGS, V87, P386, DOI 10.1016/j.enbuild.2014.11.040

Godoy-Shimizu D, 2013, CIBSE TECHN S

Lawrence R, 2016, ENERG BUILDINGS, V130, P651, DOI 10.1016/j.enbuild.2016.09.001

Mihai T, 2016, ENRGY PROCED, V85, P566, DOI 10.1016/j.egypro.2015.12.246

Ncube M, 2012, BUILD ENVIRON, V53, P26, DOI 10.1016/j.buildenv.2012.01.003

Perez-Lombard L, 2008, ENERG BUILDINGS, V40, P394, DOI 10.1016/j.enbuild.2007.03.007

Pistore L, 2015, ENRGY PROCED, V82, P519, DOI 10.1016/j.egypro.2015.11.864

Pout C. H., 2002, BRE CARBON EMISSIONS

Roulet CA, 2001, ENERG BUILDINGS, V33, P183, DOI 10.1016/S0378-7788(00)00080-3

NR 14

TC 0

Z9 0

U1 0

U2 0

PU ELSEVIER SCIENCE BV

PI AMSTERDAM

PA SARA BURGERHARTSTRAAT 25, PO BOX 211, 1000 AE AMSTERDAM, NETHERLANDS

SN 1876-6102

J9 ENRGY PROCED

PY 2017

VL 132

BP 87

EP 92

DI 10.1016/j.egypro.2017.09.643

PG 6

WC Architecture; Construction & Building Technology; Energy & Fuels;

Physics, Applied

SC Architecture; Construction & Building Technology; Energy & Fuels;

Physics

GA BJ6AD

UT WOS:000426435500015

OA gold

DA 2018-05-03

ER

PT B

AU Mo, Y  
 Zhao, D  
 Mccoy, A  
 Du, J  
 Agee, P

AF Mo, Yunjeong  
 Zhao, Dong  
 Mccoy, Andrew  
 Du, Jing  
 Agee, Philip

BE Lin, KY  
 ElGohary, N  
 Tang, P

TI Latent Relationship between Construction Cost and Energy Efficiency in  
 Multifamily Green Buildings

SO COMPUTING IN CIVIL ENGINEERING 2017: SMART SAFETY, SUSTAINABILITY, AND  
 RESILIENCE

LA English

DT Proceedings Paper

CT ASCE International Workshop on Computing in Civil Engineering (IWCCE)

CY JUN 25-27, 2017

CL Univ Washington, Seattle, WA

SP Amer Soc Civil Engineers, Amer Soc Civil Engineers, Comp Div

HO Univ Washington

DE Residential building; Energy efficiency; Machine learning;  
 Sustainability

ID CONSUMPTION

AB Residential buildings account for more than 20 percent of total energy usage in the U.S. in the past decade. Reduction of household energy consumption has environmental and economic impacts. As the first step, building scientists and construction engineers have endeavored efforts to obtain an accurate energy use prediction; however, few have focused on the relationship between construction cost and energy use. This paper investigates the associations between detailed construction cost takeoffs and actual energy uses in multifamily green buildings. The researchers employ advanced machine learning analytics to model the correlations between construction cost and energy use data which were collected from multifamily residential units. Findings identify the cost divisions in the construction stage that significantly correlates the energy use in the operational stage. The model allows developers to predict the energy consumption based on the construction costs, and enables them to adjust the investment strategies to amplify the energy efficiency of green building technologies.

C1 [Mo, Yunjeong; Zhao, Dong] Michigan State Univ, Sch Planning Design & Construct, E Lansing, MI 48824 USA.

[Mccoy, Andrew; Agee, Philip] Virginia Tech, Myers Lawson Sch Construct, Blacksburg, VA 24061 USA.

[Du, Jing] Texas A&M Univ, Dept Construct Sci, College Stn, TX 77843 USA.

RP Mo, Y (reprint author), Michigan State Univ, Sch Planning Design & Construct, E Lansing, MI 48824 USA.

EM moyunjeo@msu.edu; dzhao@msu.edu; apmccoy@vt.edu; dujing@tamu.edu;  
 pragee@vt.edu

CR Ang A, 2007, J MONETARY ECON, V54, P1163, DOI 10.1016/j.jmoneco.2006.04.006

California Energy Commission, 2008, HERS HOM EN RAT SYST

Chang CC, 2011, ACM T INTEL SYST TEC, V2, DOI 10.1145/1961189.1961199

Dong B, 2005, ENER BUILDINGS, V37, P545, DOI 10.1016/j.enbuild.2004.09.009

Tavares PFD, 2007, ENER BUILDINGS, V39, P23, DOI 10.1016/j.enbuild.2006.04.017

HALL M A, 1999, THESIS

Jones PH, 2010, INT J ENERGY SECT MA, V4, P593, DOI 10.1108/17506221011092797

Kalogirou SA, 2006, INT J LOW-CARBON TEC, V1, P201, DOI 10.1093/ijlct/1.3.201

Zhao D., 2015, J ARCHITECTURAL ENG, V21

ZHAO D, 2016, PROCEDIA ENGINEER, V145, P766, DOI DOI 10.1016/J.PR0ENG.2016.04.100

Zhao D, 2017, ENER BUILDINGS, V134, P223, DOI 10.1016/j.enbuild.2016.10.049

Zhao HX, 2012, RENEW SUST ENER REV, V16, P3586, DOI 10.1016/j.rser.2012.02.049

Zhao H. X., 2011, 2011 IEEE COMP INT M



NR 13  
 TC 0  
 Z9 0  
 U1 0  
 U2 0  
 PU AMER SOC CIVIL ENGINEERS  
 PI NEW YORK  
 PA UNITED ENGINEERING CENTER, 345 E 47TH ST, NEW YORK, NY 10017-2398 USA  
 BN 978-0-7844-8084-7  
 PY 2017  
 BP 273  
 EP 280  
 PG 8  
 WC Computer Science, Interdisciplinary Applications; Engineering, Civil  
 SC Computer Science; Engineering  
 GA BJ5RN  
 UT WOS:000426216800034  
 DA 2018-05-03  
 ER

PT J

AU Nizetic, S

AF Nizetic, Sandro

TI Realisation barriers in energy efficiency projects in Croatian public buildings: a critic overview and proposals

SO INTERNATIONAL JOURNAL OF SUSTAINABLE ENERGY

LA English

DT Article

DE Energy efficiency; barriers; public buildings; energy efficiency policy

ID BEHAVIOR; PROGRAM; CLIMATE; SAVINGS; SYSTEM; SECTOR; POLICY; GAP

AB This paper discusses in detail specific barriers to establishing energy efficiency policies in Croatian public buildings that affect the realisation of energy efficiency projects. Barriers were discovered after years of collaboration with public institutions in Croatia, especially at a local level. Although the information presented in this paper relates specifically to the geographical areas of Splitsko-Dalmatinska and Dubrovacko-Neretvanska counties in Croatia, the research can be generalised to the country as a whole. The paper also analyses the important role of the United Nations Development Programme in encouraging proactive energy efficiency policies in public buildings in Croatia. Finally, a new organisational framework is proposed to eliminate existing barriers and to establish a system which will lead to the effective realisation of energy efficiency projects in buildings. The research presented in this paper should also be useful to countries facing similar barriers to energy investments.

C1 [Nizetic, Sandro] Univ Split, Fac Elect & Mech Engn & Naval Architecture, Dept Thermodynam & Heat Engines, Split, Croatia.

RP Nizetic, S (reprint author), Univ Split, Fac Elect & Mech Engn & Naval Architecture, Dept Thermodynam & Heat Engines, Split, Croatia.

EM snizetic@fesb.hr

CR Blum H, 2013, ENER EFFIC, V6, P65, DOI 10.1007/s12053-012-9162-x

Borg N, 2008, ENER EFFIC, V1, P77, DOI 10.1007/s12053-008-9008-8

Borozan D, 2013, ENER POLICY, V59, P373, DOI 10.1016/j.enpol.2013.03.061

Bozicevic-Vrhovcak M., 2006, RENEW ENER, V31, P1867

Bukarica V, 2013, ENER POLICY, V61, P414, DOI 10.1016/j.enpol.2013.06.052

Bye T, 2008, ENER EFFIC, V1, P373, DOI 10.1007/s12053-008-9023-9

Cipriano X, 2009, INT J SUSTAIN ENERGY, V28, P3, DOI 10.1080/14786450802452332

Cubi E, 2014, INT J SUSTAIN ENERGY, V33, P1000, DOI 10.1080/14786451.2013.796945

Duic N, 2005, ENER POLICY, V33, P1003, DOI 10.1016/j.enpol.2003.10.022

European Commission, 2013, EC FIN AFF

Fleiter T, 2012, ENER EFFIC, V5, P447, DOI 10.1007/s12053-012-9157-7

Galis V., 2010, ENERGY EFFICIENCY, V4, P303

Gynther L, 2012, ENER EFFIC, V5, P67, DOI 10.1007/s12053-011-9115-9

Harvey LDD, 2009, ENER EFFIC, V2, P139, DOI 10.1007/s12053-009-9041-2  
Hauge AL, 2013, ENER EFFIC, V6, P315, DOI 10.1007/s12053-012-9175-5  
Horowitz MJ, 2011, ENER EFFIC, V4, P43, DOI 10.1007/s12053-010-9082-6  
Krajnc N, 2007, ENER POLICY, V35, P6010, DOI 10.1016/j.enpol.2007.08.006  
Markovska N, 2014, APPL ENER, V135, P597, DOI 10.1016/j.apenergy.2014.09.002  
McNeil MA, 2013, ENER EFFIC, V6, P191, DOI 10.1007/s12053-012-9182-6  
Ministry of Economy, 2010, 1 NAT EN EFF ACT PLA  
Ministry of Economy, 2011, 2 NAT EN EFF ACT PLA, P12  
Ministry of Economy and UNDP Croatia, 2010, EN EFF MAST PLAN CRO  
Nassen J, 2009, ENER EFFIC, V2, P221, DOI 10.1007/s12053-009-9046-x  
Nicolae B, 2015, ENER BUILDINGS, V86, P74, DOI 10.1016/j.enbuild.2014.10.021  
Nizetic S, 2015, ENERGY, V90, P1171, DOI 10.1016/j.energy.2015.06.053  
Nizetic S, 2014, ENERGY, V75, P379, DOI 10.1016/j.energy.2014.07.087  
Pasicko R, 2012, RENEW ENER, V46, P224, DOI 10.1016/j.renene.2012.03.029  
Puksec T, 2013, APPL ENER, V101, P15, DOI 10.1016/j.apenergy.2012.04.023  
Soroye KL, 2010, ENER EFFIC, V3, P237, DOI 10.1007/s12053-009-9069-3  
Teres-Zubiaga J, 2015, ENER BUILDINGS, V86, P194, DOI 10.1016/j.enbuild.2014.10.018  
Lay ST, 2012, INT J SUSTAIN ENERGY, V31, P23, DOI 10.1080/1478646X.2010.517607  
Thomas S, 2012, ENER EFFIC, V5, P19, DOI 10.1007/s12053-011-9122-x  
UNDP, 2011, EN MAN CULT HER  
Uran V, 2009, ENER POLICY, V37, P5427, DOI 10.1016/j.enpol.2009.08.006  
Zannis G., 2010, INT J SUSTAINABLE EN, V25, P199  
[Anonymous], 2013, TRADING EC CROATIA G  
[Anonymous], 2013, UNDP PROJECT RESULTS, P2

NR 37  
TC 0  
Z9 0  
U1 0  
U2 0  
PU TAYLOR & FRANCIS LTD  
PI ABINGDON  
PA 2-4 PARK SQUARE, MILTON PARK, ABINGDON OX14 4RN, OXON, ENGLAND  
SN 1478-6451  
EI 1478-646X  
J9 INT J SUSTAIN ENERGY  
JI Int. J. Sustain. Energy  
PY 2017  
VL 36  
IS 9  
BP 901  
EP 913  
DI 10.1080/14786451.2015.1127236  
PG 13  
WC Energy & Fuels  
SC Energy & Fuels  
GA FC7VA  
UT WOS:000407049200006  
DA 2018-05-03  
ER

PT S  
AU Nizetic, S  
    Papadopoulos, AM  
AF Nizetic, Sandro  
    Papadopoulos, Agis M.  
BE Bikas, D  
    Theodosiou, T  
    Katerina, T

TI Concept of Building Evaluation Methodology for Gap Estimation between  
Designed and Achieved energy savings

SO SUSTAINABLE SYNERGIES FROM BUILDINGS TO THE URBAN SCALE

SE Procedia Environmental Sciences

LA English

DT Proceedings Paper

CT International Conference on Sustainable Synergies from Buildings to the  
Urban Scale (SBE)

CY OCT 16-19, 2016

CL Thessaloniki, GREECE

SP Aristotle Univ Thessaloniki, Fac Engr, Dept Civil Engr, Lab Building Construct & Building Phys, Tech  
Chamber Greece

DE buildings; energy efficiency; energy savings

ID WINDOW OPENING BEHAVIOR; MEDITERRANEAN CLIMATE; OFFICE EQUIPMENT;  
CONTROL-SYSTEMS; EFFICIENCY; CONSUMPTION; PERFORMANCE; MANAGEMENT;  
IMPACT

AB Nowadays, despite the plethora of existing standards and calculation methodologies, i.e. procedures assessing a building's energy efficiency, it is unfortunately common to monitor significant differences between designed and achieved energy savings in practice. This is a problem that in extremis may lead to contractual and even legal claims, but in any case sheds doubt on the whole energy efficiency approach and finally presents one of the barriers for investments in energy efficiency projects. It should therefore be addressed and in order to achieve this, one has to understand the problem: Numerous and often intertwined factors lead to the aforementioned discrepancy, based on the differences in methodological approaches and standards adopted as well as the boundary conditions they use, they will all be discussed in the paper.

Furthermore, a novel building evaluation methodology will be presented; its conceptual approach addresses the different influences addressed and taken into account, as they can significantly affect the level of achieved energy savings in buildings. In that sense, the main purpose of the proposed methodology is to evaluate in advance, the difference rate between designed and achieved energy savings. This approach can be a useful decision tool in the phase where energy efficiency projects are rated and evaluated for possible investments. (C) 2017 The Authors. Published by Elsevier B.V.

C1 [Nizetic, Sandro] Univ Split, Rudjera Boskovicica 32, Split 21000, Croatia.

[Papadopoulos, Agis M.] Aristotle Univ Thessaloniki, Thessaloniki 54124, Greece.

RP Nizetic, S (reprint author), Univ Split, Rudjera Boskovicica 32, Split 21000, Croatia.

EM snizetic@fesb.hr

CR Andersen R, 2013, BUILD ENVIRON, V69, P101, DOI 10.1016/j.buildenv.2013.07.005

Baglivo C, 2014, ENERG BUILDINGS, V84, P483, DOI 10.1016/j.enbuild.2014.08.043

Berggren B, 2013, ENERG BUILDINGS, V65, P331, DOI 10.1016/j.enbuild.2013.06.021

Bonte M, 2014, ENERG BUILDINGS, V76, P219, DOI 10.1016/j.enbuild.2014.02.068

Croucher M, 2012, UTIL POLICY, V22, P50, DOI 10.1016/j.jup.2011.12.002

de Wilde P, 2014, AUTOMAT CONSTR, V41, P40, DOI 10.1016/j.autcon.2014.02.009

Fabi V, 2013, BUILD SIMUL-CHINA, V6, P415, DOI 10.1007/s12273-013-0119-6

Fabi V, 2012, BUILD ENVIRON, V58, P188, DOI 10.1016/j.buildenv.2012.07.009

Fang ZS, 2014, ENERG BUILDINGS, V77, P197, DOI 10.1016/j.enbuild.2014.03.030

Gul MS, 2015, ENERG BUILDINGS, V87, P155, DOI 10.1016/j.enbuild.2014.11.027

Hoicka CE, 2014, ENERG POLICY, V65, P594, DOI 10.1016/j.enpol.2013.10.053

Jaber S, 2011, ENERG BUILDINGS, V43, P1829, DOI 10.1016/j.enbuild.2011.03.024

Kawamoto K, 2004, ENERG BUILDINGS, V36, P915, DOI 10.1016/j.enbuild.2004.02.004

Maleetipwan-Mattsson P, 2015, FACILITIES, V33, P573, DOI 10.1108/F-01-2014-0004

Masoso OT, 2010, ENERG BUILDINGS, V42, P173, DOI 10.1016/j.enbuild.2009.08.009

Menezes AC, 2012, APPL ENERG, V97, P355, DOI 10.1016/j.apenergy.2011.11.075

Mungwititkul W, 1997, ENERGY, V22, P673, DOI 10.1016/S0360-5442(97)00162-X

Nizetic S, 2015, ENERGY, V90, P1171, DOI 10.1016/j.energy.2015.06.053

Nizetic S, 2015, ENERG CONVERS MANAGE, V105, P1037, DOI 10.1016/j.enconman.2015.08.063

Roisin B, 2008, ENERG BUILDINGS, V40, P514, DOI 10.1016/j.enbuild.2007.04.006

Sang X., 2014, ENERGY PROCEDIA, V62

Schild PG, 2010, GOOD PRACTICE GUIDAN

Shaikh PH, 2014, RENEW SUST ENERG REV, V34, P409, DOI 10.1016/j.rser.2014.03.027

Tetlow RM, 2015, BUILD ENVIRON, V92, P75, DOI 10.1016/j.buildenv.2015.04.009  
Theodosiou TG, 2008, ENERGBUILDINGS, V40, P2083, DOI 10.1016/j.enbuild.2008.06.006  
Webber CA, 2006, ENERGY, V31, P2823, DOI 10.1016/j.energy.2005.11.007  
Yik F. W. H., 2014, FACILITIES, V20, P406

NR 27

TC 0

Z9 0

U1 0

U2 0

PU ELSEVIER SCIENCE BV

PI AMSTERDAM

PA SARA BURGERHARTSTRAAT 25, PO BOX 211, 1000 AE AMSTERDAM, NETHERLANDS

SN 1878-0296

J9 PROCEDIA ENVIRON SCI

PY 2017

VL 38

BP 538

EP 545

DI 10.1016/j.proenv.2017.03.118

PG 8

WC Construction & Building Technology; Engineering, Civil; Environmental  
Sciences

SC Construction & Building Technology; Engineering; Environmental Sciences  
& Ecology

GA BI3FM

UT WOS:000410925400069

OA gold

DA 2018-05-03

ER

PT S

AU Nugroho, SB

Zusman, E

Nakano, R

Takahashi, K

Koakutsu, K

Kaswanto, RL

Arifin, N

Munandar, A

Arifin, HS

Muchtar, M

Gomi, K

Fujita, T

AF Nugroho, S. B.

Zusman, E.

Nakano, R.

Takahashi, K.

Koakutsu, K.

Kaswanto, R. L.

Arifin, N.

Munandar, A.

Arifin, H. S.

Muchtar, M.

Gomi, K.

Fujita, T.

BE Seto, K

Robinson, D

Virji, H

Kovacs, Z  
 Zhai, J  
 Sami, N  
 Pettit, C  
 Sridhar, KS

TI The Effect of Prepaid Electricity System on Household Energy Consumption  
 - the Case of Bogor, Indonesia

SO URBAN TRANSITIONS CONFERENCE

SE Procedia Engineering

LA English

DT Proceedings Paper

CT Urban Transitions Conference

CY SEP, 2016

CL Shanghai, PEOPLES R CHINA

DE Prepaid Electric Metering System; Household Energy Consumption;  
 Seemingly Unrelated Regression; Bogor City Indonesia

ID METER

AB Governments are increasingly seeking low-cost ways to curb residential energy use. This article examines the effect of one such innovative approach to energy savings in Bogor, Indonesia: a prepaid electricity meter system. The Bogor prepaid system requires households pay up front for their electricity as the meter tracks consumption and credit. By enabling users to see the relationship between energy use and costs, the metering system is intended to promote energy savings behaviour. However, the system in Bogor is introduced on a voluntarily opt-in basis. Further, it is still uncertain whether those joining the program will actually save energy. Identifying which kinds of households are most likely to join the program and then save energy are important considerations as policymakers contemplate further reforms to Bogor's prepaid system. A survey was conducted of 600 Bogor households to determine whether certain kinds of households were more inclined to join the voluntary program and self-report energy-relevant behaviour. A seemingly unrelated regression equation (SURE) model was then used to estimate the possible correlation between a series of covariates familiar to the energy savings literature and the decision to initially join and then saving energy through the program. The result shows the family size and recent income changes (during the last five years) were more likely to join voluntary program, while senior citizens were less likely to join. The results also reveal that education level play significant role in changing behaviour of households in the program. The results suggest that the program needs to be made convenient for low-income and elderly households. Accompanying the program with additional information on energy savings might also help make the program more effective. (c) 2017 The Authors. Published by Elsevier Ltd.

C1 [Nugroho, S. B.; Zusman, E.; Nakano, R.; Takahashi, K.; Koakutsu, K.] IGES, Integrated Policies Sustainable Soc Area IPSS, 2108-11 Kamiyamaguchi, Hayama, Kanagawa 2400115, Japan.

[Kaswanto, R. L.; Arifin, N.; Munandar, A.; Arifin, H. S.] Bogor Univ Agr, Jln Meranti Kampus IPB Darmaga, Bogor 16680, Indonesia.

[Mughtar, M.] Wahana Usaha Univ, Menara Kuningan, 2nd Floor, Suite B-3, Jl HR Rasuna Said Blok X-7 Ka, Jakarta 12940, Indonesia.

[Gomi, K.; Fujita, T.] Natl Inst Environm Studies, 16-2 Onogawa, Ibaraki 3058506, Japan.

RP Nugroho, SB (reprint author), IGES, Integrated Policies Sustainable Soc Area IPSS, 2108-11 Kamiyamaguchi, Hayama, Kanagawa 2400115, Japan.

EM nugroho@iges.or.jp

FU project "Innovative Modelling and Monitoring Research towards Low Carbon Society and Eco-Cities and Regions"; Bogor Agricultural University (IPB); Ministry of Environment Japan (MOEJ)

FX This research is partially supported by the project "Innovative Modelling and Monitoring Research towards Low Carbon Society and Eco-Cities and Regions" in collaboration with Bogor Agricultural University (IPB) and funded by the Ministry of Environment Japan (MOEJ) in 2015.

CR Abrahamse, 2007, J ENERGY PSYCHOL, V27

Abrahamse W, 2005, J ENVIRON PSYCHOL, V25, P273, DOI 10.1016/j.jenvp.2005.08.002

Aziz A. A., 2013, INT J ENERGY EC POLI, V3, P1

Barr S., 2005, APPL GEOGR, V20, P1

Benders RMT, 2006, ENER POLICY, V34, P3612, DOI 10.1016/j.enpol.2005.08.005

Cerezo J. A. L., 2003, TECHNOL SOC, V25, P153  
 Chou JS, 2014, APPL ENERG, V128, P336, DOI 10.1016/j.apenergy.2014.04.083  
 Darby Sarah, 2006, ENERGY POLICY, V31  
 DAVIS FD, 1989, MIS QUART, V13, P319, DOI 10.2307/249008  
 Despiri D., 2007, DETERMINANTS DOMESTI  
 Dunlap R., 2002, HDB ENV SOCIOLOGY  
 Faruqui A, 2010, ENERGY, V35, P1598, DOI 10.1016/j.energy.2009.07.042  
 Firth S, 2008, ENERGBUILDINGS, V40, P926, DOI 10.1016/j.enbuild.2007.07.005  
 Fishbein M., 1975, BELIEF ATTITUDE INTE  
 Greene W. H., 2002, LIMDEP ECONOMETRIC M  
 Henrysson, 2000, ENERGY POLICY, V28  
 Hujits, 2014, J ENV PHYCOLOGY, V38  
 Jansson, 2010, J CONSUMER MARKETING, V27, P13  
 JONES RE, 1992, RURAL SOCIOL, V57, P28  
 Jridi, 2005, ENERGY BUILDINGS, V103  
 Kawaguchi H, 2012, COMP PAP CD ROM 91 A  
 Kawaguchi H, 2010, P 12 WORLD C TRANSP  
 Kondo S., 2007, ENERGY CONSUMPTION R  
 LUTZENHISER L, 1993, ANNU REV ENERGENV, V18, P247, DOI 10.1146/annurev.energy.18.1.247  
 Senbil M., 2008, COMP PAP CD ROM 87 A  
 Urban J., 2012, ENERGY POLICY, V47  
 VANRAAIJ WF, 1983, J ECON PSYCHOL, V4, P85, DOI 10.1016/0167-4870(83)90047-8  
 Vollink T, 2010, J APPL SOC PSYCHOL, V40, P2556, DOI 10.1111/j.1559-1816.2010.00670.x  
 Wood G, 2007, INT J ENERGRES, V31, P56, DOI 10.1002/er.1228  
 World Business Council for Sustainable Development, 2009, EN EFF BUILD TRANSF  
 Yamamoto Y, 2008, ENERGPOLICY, V36, P1679, DOI 10.1016/j.enpol.2008.01.022  
 Yuanquan, 2008, TSINGHUA SCI TECHNOL, V13  
 Zarnikau J, 2003, ENERGPOLICY, V31, P1661, DOI 10.1016/S0301-4215(02)00232-X

NR 33

TC 0

Z9 0

U1 0

U2 0

PU ELSEVIER SCIENCE BV

PI AMSTERDAM

PA SARA BURGERHARTSTRAAT 25, PO BOX 211, 1000 AE AMSTERDAM, NETHERLANDS

SN 1877-7058

J9 PROCEDIA ENGINEER

PY 2017

VL 198

BP 642

EP 653

DI 10.1016/j.proeng.2017.07.117

PG 12

WC Multidisciplinary Sciences; Urban Studies

SC Science & Technology - Other Topics; Urban Studies

GA BJ4ZK

UT WOS:000425682900057

OA gold

DA 2018-05-03

ER

PT J

AU Papadopoulos, TA

Christoforidis, GC

Papagiannis, GK

AF Papadopoulos, Theofilos A.

Christoforidis, Georgios C.

Papagiannis, Grigoris K.

TI USE Efficiency: an innovative educational programme for energy efficiency in buildings

SO INTERNATIONAL JOURNAL OF SUSTAINABLE ENERGY

LA English

DT Article

DE Energy audits; energy education; building energy efficiency; inter-institutional programme; interdisciplinary course

ID SUSTAINABLE DEVELOPMENT; IMPLEMENTATION; DESIGN

AB Power engineers are expected to play a pivotal role in transforming buildings into smart and energy-efficient structures, which is necessary since buildings are responsible for a considerable amount of the total energy consumption. To fulfil this role, a holistic approach in education is required, tackling subjects traditionally related to other engineering disciplines. In this context, USE Efficiency is an inter-institutional and interdisciplinary educational programme implemented in nine European Universities targeting energy efficiency in buildings. The educational programme effectively links professors, students, engineers and industry experts, creating a unique learning environment. The scope of the paper is to present the methodology and the general framework followed in the USE Efficiency programme. The proposed methodology can be adopted for the design and implementation of educational programmes on energy efficiency and sustainable development in higher education. End-of-course survey results showed positive feedback from the participating students, indicating the success of the programme.

C1 [Papadopoulos, Theofilos A.] Democritus Univ Thrace, Dept Elect & Comp Engr, Xanthi, Greece.

[Christoforidis, Georgios C.] Technol Educ Inst Western Macedonia, Sch Technol Applicat, Koila Kozani, Greece.

[Papagiannis, Grigoris K.] Aristotle Univ Thessaloniki, Power Syst Lab, Dept Elect & Comp Engr, Thessaloniki, Greece.

RP Papadopoulos, TA (reprint author), Democritus Univ Thrace, Dept Elect & Comp Engr, Xanthi, Greece.

EM thpapad@ee.duth.gr

RI Christoforidis, Georgios/C-6486-2018

OI Christoforidis, Georgios/0000-0001-5595-8409

FU USE Efficiency project of the IEE programme; USE Efficiency project in the frame of the IEE programme

FX The funding of this work under the USE Efficiency project in the frame of the IEE programme is greatly acknowledged. The authors are solely responsible for the results presented in this paper, which do not represent the Community.

CR Aronoff J, 2013, IEEE POWER ENERGY M, V11, P30, DOI 10.1109/MPE.2012.2225234

Asare-Bediako B., 2012, 3 IEEE PES INT C EXH

Bremer H. M., 2006, J CLEAN PROD, V14, P952

Brunsgaard C, 2014, BUILD ENVIRON, V72, P1, DOI 10.1016/j.buildenv.2013.10.011

Choi BCK, 2006, CLIN INVEST MED, V29, P351

Culvera S. M., 2011, EUROPEAN J HIGHER ED, V1, P220

Desha C, 2015, J CLEAN PROD, V106, P283, DOI 10.1016/j.jclepro.2014.03.099

Ferreira AJD, 2006, J CLEAN PROD, V14, P973, DOI 10.1016/j.jclepro.2006.01.003

Fisher M.R, 2003, INT J SUSTAINABILITY, V4, P138, DOI DOI 10.1108/14676370310467159)

Geros V, 2006, RENEW ENERG, V31, P2447, DOI 10.1016/j.renene.2005.11.011

Gider F, 2012, IEEE T EDUC, V55, P332, DOI 10.1109/TE.2011.2174238

Rungerford H. R., 1990, J ENVIRON EDUC, V21, P8, DOI DOI 10.1080/00958964.1990.10753743

IEA (International Energy Agency), 2013, TRANS SUST BUILD STR

IEA (International Energy Agency), 2012, EN TECHN PERSP 2015

Jennings P, 2001, RENEW ENERG, V22, P113, DOI 10.1016/S0960-1481(00)00028-8

Jennings P, 2009, RENEW ENERG, V34, P435, DOI 10.1016/j.renene.2008.05.005

Kandpal TC, 2014, RENEW SUST ENERG REV, V34, P300, DOI 10.1016/j.rser.2014.02.039

Kandpal TC, 1999, APPL ENERG, V64, P71, DOI 10.1016/S0306-2619(99)00076-8

Klemes JJ, 2013, APPL ENERG, V101, P33, DOI 10.1016/j.apenergy.2012.01.039

Koen K., 2009, 20 INT C EXH EL DIST

Kramer R., 2007, ENERG ENG, V104, P45

Lozano FJ, 2014, J CLEAN PROD, V64, P136, DOI 10.1016/j.jclepro.2013.08.022

Lozano R, 2013, J CLEAN PROD, V48, P10, DOI 10.1016/j.jclepro.2011.10.006

McKeown R., 2002, ED SUSTAINABLE DEV T  
 McNicholl A, 2001, ENER G BUILDINGS, V33, P213, DOI 10.1016/S0378-7788(00)00084-0  
 Balraja S. O., 2003, J HIGH EDUC POLICY M, V25, P131, DOI [10.1080/1360080032000122615, DOI 10.1080/1360080032000122615]  
 NIEDERJOHN RJ, 1982, IEEE T EDUC, V25, P65, DOI 10.1109/TE.1982.4321543  
 Perez-Lombard L, 2008, ENER G BUILDINGS, V40, P394, DOI 10.1016/j.enbuild.2007.03.007  
 Plumb C., 2007, CHANGE MAGAZINE MAY  
 Sousa J. L., 2010, PHYS LAB ENERGY EFFI  
 Sumpert A., 2012, ELECT ENERGY EFFICIE  
 US Department of Energy, 2008, TECHNICAL REPORT  
 US Power and Energy Engineering Workforce Collaborative, 2009, TECHNICAL REPORT  
 Vann J, 2006, J CLEAN PROD, V14, P900, DOI 10.1016/j.jclepro.2006.01.002  
 Wong W., 2005, SURVEYIG BUILT ENV, V16, P7  
 Yang Y., 2011, INT C CONS EL COMM N  
 Zografakis N, 2008, ENER G POLICY, V36, P3226, DOI 10.1016/j.enpol.2008.04.021

NR 37  
 TC 0  
 Z9 0  
 U1 0  
 U2 0

PU TAYLOR & FRANCIS LTD  
 PI ABINGDON  
 PA 2-4 PARK SQUARE, MILTON PARK, ABINGDON OX14 4RN, OXON, ENGLAND  
 SN 1478-6451  
 EI 1478-646X  
 J9 INT J SUSTAIN ENERGY  
 JI Int. J. Sustain. Energy  
 PY 2017  
 VL 36  
 IS 9  
 BP 855  
 EP 871  
 DI 10.1080/14786451.2015.1119833  
 PG 17  
 WC Energy & Fuels  
 SC Energy & Fuels  
 GA FC7VA  
 UT WOS:000407049200003  
 DA 2018-05-03  
 ER

PT B  
 AU Rafsanjani, HN  
 Ahn, C  
 Chen, JY  
 AF Rafsanjani, Hamed Nabizadeh  
 Ahn, Changbum  
 Chen, Jiayu  
 BE Lin, KY  
 ElGohary, N  
 Tang, P  
 TI Analysis of Delay Interval and Energy-Load Variation for Non-Intrusively  
 Extracting Occupant Energy-Use Information in Commercial Buildings  
 SO COMPUTING IN CIVIL ENGINEERING 2017: SMART SAFETY, SUSTAINABILITY, AND  
 RESILIENCE  
 LA English  
 DT Proceedings Paper  
 CT ASCE International Workshop on Computing in Civil Engineering (IWCCE)



CY JUN 25-27, 2017

CL Univ Washington, Seattle, WA

SP Amer Soc Civil Engineers, Amer Soc Civil Engineers, Comp Div

HO Univ Washington

AB Many studies indicate that energy consumption in commercial buildings is highly related to occupants' energy-use behaviors, and improving these behaviors is regarded as the most cost-effective approach toward enhancing commercial building energy efficiency. Effective behavior-interventions rely on the availability of occupant-specific energy-use information, which is extremely expensive to capture with existing intrusive load monitoring (ILM) technologies. On the other hand, non-intrusive load monitoring (NILM) approaches have proven cost effective for monitoring appliance-specific energy consumption. In order to extend the concept of NILM to occupant energy-use monitoring in commercial buildings, this paper examines the importance of two occupancy-related energy-use variables-delay interval and energy-load variation-in identifying occupant-specific energy-use information. The results from implementing a k-Nearest Neighbors classifier into aggregate energy consumption data collected over the course of one month from a small office space reveal that these variables are effective in developing sophisticated NILM-based approaches for obtaining occupant energy consumption information. By providing this information at minimal cost, such approaches could make a great contribution to behavior-related energy research.

C1 [Rafsanjani, Hamed Nabizadeh; Ahn, Changbum] Univ Nebraska Lincoln, Durham Sch Architectural Engr & Construct, NH 113, Lincoln, NE 68588 USA.

[Chen, Jiayu] City Univ Hong Kong, Dept Civil & Architectural Engr, Tat Chee Ave, Acad 1, Y6621, Kowloon, Hong Kong, Peoples R China.

RP Rafsanjani, HN (reprint author), Univ Nebraska Lincoln, Durham Sch Architectural Engr & Construct, NH 113, Lincoln, NE 68588 USA.

EM hnabizadeh@unl.edu; cahn2@unl.edu; jiaychen@cityu.edu.hk

FU Research Council Interdisciplinary Grant Award from UNL

FX This work was financially supported by the Research Council

Interdisciplinary Grant Award from UNL. Any opinions, findings, conclusions, or recommendations expressed in this paper are those of the authors and do not necessarily reflect the views of the UNL Research Council.

CR Anzanello M. J., 2009, SELECTING BEST PROCE

Chen JY, 2014, ENERG BUILDINGS, V82, P540, DOI 10.1016/j.enbuild.2014.07.053

Clevenger C., J COMPUTING CIVIL EN, V28

Fawcett T, 2004, ROC GRAPHS NOTES PRA

Gajowniczek K, 2015, ENERGIES, V8, P7407, DOI 10.3390/en8077407

Ghahramani A, 2015, BUILD ENVIRON, V92, P86, DOI 10.1016/j.buildenv.2015.04.017

Gibert K., 2010, CHOOSING RIGHT DATA

HART GW, 1992, P IEEE, V80, P1870, DOI 10.1109/5.192069

Kleiminger W., 2013, P 5 ACM WORKSH EMB S, P10

Larose D. T., 2014, DISCOVERING KNOWLEDG, P149

MATTHEWS BW, 1975, BIOCHIM BIOPHYS ACTA, V405, P442, DOI 10.1016/0005-2795(75)90109-9

Mucherino A, 2009, SPRINGER SER OPTIM A, V34, P83, DOI 10.1007/978-0-387-88615-2\_4

Rafsanjani HN, 2016, CONSTRUCTION RESEARCH CONGRESS 2016: OLD AND NEW

CONSTRUCTION TECHNOLOGIES CONVERGE IN HISTORIC SAN JUAN, P1133

Rafsanjani HN, 2015, ENERGIES, V8, P10996, DOI 10.3390/en81010996

Rafsanjani HN, 2015, SUSTAINABLE HUMAN-BUILDING ECOSYSTEMS, P44

U. S. Energy Information Administration, 2014, ANN EN REV

Zeifman M, 2011, IEEE T CONSUM ELECTR, V57, P76, DOI 10.1109/TCE.2011.5735484

Zoha A, 2012, SENSORS-BASEL, V12, P16838, DOI 10.3390/s121216838

NR 18

TC 0

Z9 0

U1 0

U2 0

PU AMER SOC CIVIL ENGINEERS

PI NEW YORK

PA UNITED ENGINEERING CENTER, 345 E 47TH ST, NEW YORK, NY 10017-2398 USA

BN 978-0-7844-8084-7

PY 2017

BP 191

EP 197

PG 7

WC Computer Science, Interdisciplinary Applications; Engineering, Civil

SC Computer Science; Engineering

GA BJ5RN

UT WOS:000426216800024

DA 2018-05-03

ER

PT B

AU Ramrecha, V

Bekaroo, G

Santokhee, A

Juddoo, S

AF Ramrecha, Vishamlall

Bekaroo, Girish

Santokhee, Aditya

Juddoo, Suraj

GP IEEE

TI Exploring the Application and Usability of NFC for Promoting

Self-Learning on Energy Consumption of Household Electronic Appliances

SO 2017 IEEE 4TH INTERNATIONAL CONFERENCE ON SOFT COMPUTING & MACHINE

INTELLIGENCE (ISCFI)

LA English

DT Proceedings Paper

CT 4th IEEE International Conference on Soft Computing & Machine

Intelligence (ISCFI)

CY NOV 23-24, 2017

CL MAURITIUS

SP IEEE, IEEE Computat Intelligence Soc, India Int Congress Computat Intelligence, Scientia Salus Patriae

DE near-field communication; self-learning; energy consumption; household

appliances; usability

AB During the past decade, the significant increase in the adoption of consumer electronics has caused a rise in energy demand within the residential and household sectors globally. Since these electronics are dependent on electricity, the impact of these sectors on the environment is also deteriorating and it becomes important to take remedial action. For this, various websites and mobile applications have emerged that provide information to household users on energy consumption of devices and as well as reduction mechanisms. However, since these platforms are limited in various ways in their endeavor to promote self-learning on energy consumption reduction, awareness still remains an important barrier thus giving rise to the need for further investigation on innovative technologies and platforms. Even though Near Field Communication (NFC) could potentially be used, limited work has been conducted in relation to energy consumption of consumer electronics. As such, this paper delves into the application and usability of NFC for promoting self-learning on energy consumption of household electronic appliances through an Android based application called NFC Energy Tracker (NET).

C1 [Ramrecha, Vishamlall; Bekaroo, Girish; Santokhee, Aditya; Juddoo, Suraj] Middlesex Univ Mauritius, Coastal Rd, Uniciti, Flic En Flac, Mauritius.

RP Ramrecha, V (reprint author), Middlesex Univ Mauritius, Coastal Rd, Uniciti, Flic En Flac, Mauritius.

EM vishamramrecha@live.com

CR Bekaroo G, 2016, RENEW SUST ENERG REV, V57, P1580, DOI 10.1016/j.rser.2015.12.147

Castillo J., 1998, CHI 98 C SUMM HUM FA

Crosbie T, 2008, ENERG POLICY, V36, P2191, DOI 10.1016/j.enpol.2008.02.010

de Almeida A, 2011, ENERG BUILDINGS, V43, P1884, DOI 10.1016/j.enbuild.2011.03.027

EIA, 2016, CONS EFF

Ghiron S., 2009, IEEE 1 INT WORKSH NE

Greenberg S., 2009, MOTIVATING SUSTAINAB

Gubbi J, 2013, FUTURE GENER COMP SY, V29, P1645, DOI 10.1016/j.future.2013.01.010

Harrison Rachel, 2013, J INTERACTION SCI, V1, P1, DOI DOI 10.1186/2194-0827-1-1  
 He H., 2008, MOTIVATING SUSTAINAB  
 Kostakos V., 2007, 5 ANN IEEE INT C PER  
 Monteiro D., 2012, IEEE 2012 INT C COMP  
 Network World, 2017, NETWORK WORLD  
 Nielsen J., 1995, 10 USABILITY HEURIST  
 Nielsen J., 2012, MANY TEST USERS USAB  
 Nielsen J., 1994, P SIGCHI C HUM FACT  
 Peattie K, 2010, ANNU REV ENV RESOUR, V35, P195, DOI 10.1146/annurev-environ-032609-094328  
 Purch, 2017, 10TOPREVIEWS  
 SHRM, 2012, SOC MED WHAT AR ADV  
 Syngellakis S., 2014, WASTE TO ENERGY  
 WEISER M, 1991, SCI AM, V265, P94, DOI 10.1038/scientificamerican0991-94  
 World Nuclear Association, 2017, WORLD EN NEEDS NUCL

NR 22

TC 0

Z9 0

U1 0

U2 0

PU IEEE

PI NEW YORK

PA 345 E 47TH ST, NEW YORK, NY 10017 USA

BN 978-1-5386-1314-6

PY 2017

BP 154

EP 158

PG 5

WC Computer Science, Artificial Intelligence; Computer Science, Theory &  
 Methods; Engineering, Electrical & Electronic

SC Computer Science; Engineering

GA BJ6DT

UT WOS:000426527600031

DA 2018-05-03

ER

PT J

AU Risch, A

Salmon, C

AF Risch, Anna

Salmon, Claire

TI What matters in residential energy consumption: evidence from France

SO INTERNATIONAL JOURNAL OF GLOBAL ENERGY ISSUES

LA English

DT Article

DE household energy consumption; discrete-continuous choice model;  
 residential sector

ID SPACE HEATING EXPENDITURES; ELECTRICITY DEMAND; MICROECONOMETRIC  
 APPROACH; HOMEOWNERS DECISIONS; SOCIAL PRACTICE; CHOICE ANALYSIS; POLICY  
 MEASURES; HOUSEHOLD; SECTOR; GERMANY

AB Given the objectives countries set to realise energy savings and decrease greenhouse gas emissions, an understanding of the main factors driving household energy consumption is crucial in formulating effective policy measures. The objective of this study is to identify the main determinants of household energy consumption in French residences. The model uses a discrete-continuous decision framework that allows for interactions between decisions about the heating system (discrete choice) and about energy consumption (continuous choice). The results show that the intensity of energy used per square metre is almost completely determined by the technical properties of the dwelling and the climate. The role of socio-demographic variables is shown to be particularly small. The paper shows that to be effective,

environmental policy must strongly encourage households to renovate and adopt energy-saving appliances.

C1 [Risch, Anna] Univ Grenoble Alpes, GAEL Lab Econ Appliquee Grenoble, 1241 Rue Residences, F-38400 St Martin Dheres, France.

[Salmon, Claire] Univ Savoie Mont Blanc, IREGE, 4 Chem Bellevue, BP 80439, F-74944 Annecy Le Vieux, France.

RP Risch, A (reprint author), Univ Grenoble Alpes, GAEL Lab Econ Appliquee Grenoble, 1241 Rue Residences, F-38400 St Martin Dheres, France.

EM anna.risch@univ-grenoble-alpes.fr; claire.salmon@univ-smb.fr

OI SALMON, CLAIRE/0000-0003-3555-2051

CR ADEME, 2014, CLIM AIR EN

Asadoorian MO, 2008, ENERG ECON, V30, P1577, DOI 10.1016/j.eneco.2007.02.003

BAKER P, 1989, ECON J, V99, P720, DOI 10.2307/2233767

BAKER P, 1991, OXFORD REV ECON POL, V7, P54, DOI 10.1093/oxrep/7.2.54

Barker T, 2007, ENERG POLICY, V35, P4935, DOI 10.1016/j.enpol.2007.04.009

Bentzen J, 2004, ENERG ECON, V26, P123, DOI 10.1016/S0140-9883(03)00047-1

Berkhout PHG, 2000, ENERG POLICY, V28, P425, DOI 10.1016/S0301-4215(00)00022-7

Bernard JT, 1996, CAN J ECON, V29, P92, DOI 10.2307/136153

Branch E. R., 1993, ENERGY J, V14, P227

Braun FG, 2010, ENERG POLICY, V38, P5493, DOI 10.1016/j.enpol.2010.04.002

Cabeza LF, 2014, RENEW SUST ENER REV, V36, P188, DOI 10.1016/j.rser.2014.04.053

Cayla JM, 2011, ENERG POLICY, V39, P7874, DOI 10.1016/j.enpol.2011.09.036

Cayla J. M., 2010, P ACEEE SUMM STUD EN

Charlier D, 2012, ENERG POLICY, V46, P170, DOI 10.1016/j.enpol.2012.03.048

Cheng V, 2011, ENVIRON MODELL SOFTW, V26, P1186, DOI 10.1016/j.envsoft.2011.04.005

Couture S, 2012, ENERG ECON, V34, P1972, DOI 10.1016/j.eneco.2012.08.022

DUBIN JA, 1984, ECONOMETRICA, V52, P345, DOI 10.2307/1911493

Elnakat A, 2015, ENERG POLICY, V82, P166, DOI 10.1016/j.enpol.2015.03.014

Estiri H, 2015, ENERG POLICY, V86, P585, DOI 10.1016/j.enpol.2015.08.008

Estiri H, 2014, ENERG ECON, V43, P178, DOI 10.1016/j.eneco.2014.02.013

Galvin R., 2015, REBOUND EFFECT HOME

Galvin R, 2015, ENERG POLICY, V86, P759, DOI 10.1016/j.enpol.2015.08.026

Garbacz C., 1984, ENERGY J, V5, P150

Gram-Hanssen K, 2014, ARCHIT ENG DES MANAG, V10, P91, DOI 10.1080/17452007.2013.837251

Gram-Hanssen K, 2013, ENERG EFFIC, V6, P447, DOI 10.1007/s12053-012-9184-4

Greening LA, 2000, ENERG POLICY, V28, P389

Itard L., 2009, ENERG BUILDINGS, V41, P1223, DOI DOI 10.1016/J.ENBUILD.2009.07.002

Halvorsen B, 2001, RESOUR ENERGY ECON, V23, P1, DOI 10.1016/S0928-7655(00)00035-X

Hanemann M., 2013, 072013 WP

Hargreaves T, 2011, J CONSUM CULT, V11, P79, DOI 10.1177/1469540510390500

HECKMAN JJ, 1985, J ECONOMETRICS, V30, P239, DOI 10.1016/0304-4076(85)90139-3

Heinonen J, 2014, ENERG BUILDINGS, V76, P295, DOI 10.1016/j.enbuild.2014.02.079

Huebner GM, 2015, APPL ENER, V159, P589, DOI 10.1016/j.apenergy.2015.09.028

Huebner GM, 2013, ENERG BUILDINGS, V66, P626, DOI 10.1016/j.enbuild.2013.07.043

Kelly S, 2011, ENERGY, V36, P5610, DOI 10.1016/j.energy.2011.07.009

Labandeira X, 2006, ENERG J, V27, P87

Lange I, 2014, ECOL ECON, V107, P76, DOI 10.1016/j.ecolecon.2014.07.021

Larsen BM, 2004, ENERG ECON, V26, P179, DOI 10.1016/j.eneco.2004.02.001

Leth-Petersen S, 2001, ENERG ECON, V23, P387, DOI 10.1016/S0140-9883(00)00078-5

Levinson A, 2004, RESOUR ENERGY ECON, V26, P51, DOI [10.1016/S0928-7655(03)00047-2, 10.1016/S0928-7655(03)00047-2]

Mansur ET, 2008, J ENVIRON ECON MANAG, V55, P175, DOI 10.1016/j.jeem.2007.10.001

Maruejols L, 2011, ENERG POLICY, V39, P3655, DOI 10.1016/j.enpol.2011.03.072

Meier H, 2010, ENERG ECON, V32, P949, DOI 10.1016/j.eneco.2009.11.008

Michelsen CC, 2016, ENERG POLICY, V89, P95, DOI 10.1016/j.enpol.2015.11.018

Michelsen CC, 2013, ENERG POLICY, V57, P221, DOI 10.1016/j.enpol.2013.01.045

Michelsen CC, 2012, ENERG ECON, V34, P1271, DOI 10.1016/j.eneco.2012.06.009

MURPHY KM, 1985, J BUS ECON STAT, V3, P370, DOI 10.2307/1391724

Nesbakken R, 1999, ENER E CON, V21, P493, DOI 10.1016/S0140-9883(99)00022-5  
 Nesbakken R, 2001, SCAND J ECON, V103, P165, DOI 10.1111/1467-9442.00236  
 Newell RG, 2008, RESOUR ENERGY ECON, V30, P527, DOI 10.1016/j.reseneeco.2008.09.004  
 PARTI M, 1980, BELL J ECON, V11, P309, DOI 10.2307/3003415  
 Rehdanz K, 2007, ENER E CON, V29, P167, DOI 10.1016/j.eneco.2006.04.002  
 Sardianou E., 2008, ENER BUILDINGS, V35, P3778  
 Shove E, 2014, THEOR CULT SOC, V31, P41, DOI 10.1177/0263276414536746  
 Sorrell S., 2007, REBOUND EFFECT ASSES  
 Steemers K, 2009, BUILD RES INF, V37, P625, DOI 10.1080/09613210903186661  
 Sunikka-Blank M, 2012, BUILD RES INF, V40, P260, DOI 10.1080/09613218.2012.690952  
 Swan LG, 2009, RENEW SUST ENER REV, V13, P1819, DOI 10.1016/j.rser.2008.09.033  
 Vaage K, 2000, ENER E CON, V22, P649, DOI 10.1016/S0140-9883(00)00053-0  
 Vringer K, 2007, ENER POLICY, V35, P553, DOI 10.1016/j.enpol.2005.12.025  
 Wallis H, 2016, ENER POLICY, V94, P224, DOI 10.1016/j.enpol.2016.03.046  
 Wyatt P, 2013, ENER POLICY, V60, P540, DOI 10.1016/j.enpol.2013.05.037  
 Yun GY, 2011, APPL ENER, V88, P2191, DOI 10.1016/j.apenergy.2011.01.010

NR 63

TC 0

Z9 0

U1 1

U2 2

PU INDERSCIENCE ENTERPRISES LTD

PI GENEVA

PA WORLD TRADE CENTER BLDG, 29 ROUTE DE PRE-BOIS, CASE POSTALE 856, CH-1215  
 GENEVA, SWITZERLAND

SN 0954-7118

EI 1741-5128

J9 INT J GLOBAL ENERGY

JI Int. J. Glob. Energy Issue

PY 2017

VL 40

IS 1-2

BP 79

EP 116

DI 10.1504/IJGEI.2017.080767

PG 38

WC Environmental Studies

SC Environmental Sciences & Ecology

GA EO2TP

UT WOS:000396549100004

DA 2018-05-03

ER

PT J

AU Shin, W

Park, M

AF Shin, Wonkyoung

Park, Minyong

TI Quantitative Analysis Of User Interfaces For Large Electronic Home  
 Appliances And Mobile Devices Based On Lifestyle Categorization Of Older  
 Users

SO EXPERIMENTAL AGING RESEARCH

LA English

DT Article

ID ADULTS; AGE; USABILITY; DESIGN; ENVIRONMENTS; PERFORMANCE; CONSUMERS;  
 PRODUCTS; PEOPLE; GENDER

AB Background/Study Context: The increasing longevity and health of older users as well as aging  
 populations has created the need to develop senior-oriented product interfaces. This study aims to find

user interface (UI) priorities according to older user groups based on their lifestyle and develop quality of UI (QUI) models for large electronic home appliances and mobile products. Methods: A segmentation table designed to show how older users can be categorized was created through a review of the literature to survey 252 subjects with a questionnaire. Factor analysis was performed to extract six preliminary lifestyle factors, which were then used for subsequent cluster analysis. The analysis resulted in four groups. Cross-analysis was carried out to investigate which characteristics were included in the groups. Analysis of variance was then applied to investigate the differences in the UI priorities among the user groups for various electronic devices. Finally, QUI models were developed and applied to those electronic devices. Results: Differences in UI priorities were found according to the four lifestyles (money-oriented, innovation-oriented, stability- and simplicity-oriented, and innovation- and intellectual-oriented). Twelve QUI models were developed for four different lifestyle groups associated with different products. Three washers and three smartphones were used as an example for testing the QUI models. Conclusion: The UI differences of the older user groups by the segmentation in this study using several key (i.e., demographic, socioeconomic, and physical-cognitive) variables are distinct from earlier studies made by a single variable. The differences in responses clearly indicate the benefits of integrating various factors of older users, rather than single variable, in order to design and develop more innovative and better consumer products in the future. The results of this study showed that older users with a potentially high buying power in the future are likely to have higher satisfaction when selecting products customized for their lifestyle. Designers could also use the results of UI evaluation for older users based on their lifestyle before developing products through QUI modeling. This approach would save time and costs.

C1 [Shin, Wonkyoung; Park, Minyong] Hanyang Univ, Dept Ind Engr, 222 Wangsimni Ro, Seoul 04763, South Korea.

RP Park, M (reprint author), Hanyang Univ, Dept Ind Engr, 222 Wangsimni Ro, Seoul 04763, South Korea.  
EM mypark@hanyang.ac.kr

CR Ahmad Norzieiriani, 2010, Business Strategy Series, V11, P227, DOI 10.1108/17515631011063767

Arning K, 2007, COMPUT HUM BEHAV, V23, P2904, DOI 10.1016/j.chb.2006.06.005

Bouwhuis DG, 2003, GERONTECHNOLOGY, V2, P232

Braz C, 2007, LECT NOTES COMPUT SC, V4663, P114

Brengman M, 2005, J BUS RES, V58, P79, DOI 10.1016/S0148-2963(02)00476-9

Carpenter BD, 2007, COMPUT HUM BEHAV, V23, P3012, DOI 10.1016/j.chb.2006.08.015

Chaffin DB, 2000, HUM FACTORS, V42, P408, DOI 10.1518/00187200077969822

Chan T. W., 2002, CULTURES CONSUMPTION

Chen MK, 2010, EXPERT SYST APPL, V37, P694, DOI 10.1016/j.eswa.2009.06.012

Chou JR, 2007, COMPUT HUM BEHAV, V23, P2040, DOI 10.1016/j.chb.2006.02.011

Davidson I., 2002, UNDERSTANDING K MEAN

Dey PK, 2010, APPL SOFT COMPUT, V10, P990, DOI 10.1016/j.asoc.2010.03.010

Donyaee M., 2002, P 12 C SOFTW QUAL OT, P1

Dumas JS, 1999, A PRACTICAL GUIDE TO

Emiliani PL, 2005, IBM SYST J, V44, P605, DOI 10.1147/sj.443.0605

Ergu DJ, 2013, J SUPERCOMPUT, V64, P835, DOI 10.1007/s11227-011-0625-1

Exter T., 1990, AM DEMOGR, V12, P30

Folmer E., 2003, Software Process Improvement and Practice, V8, P67, DOI 10.1002/spip.171

Gonzalez A. M., 2002, EUR J MARKETING, V36, P51, DOI DOI 10.1108/03090560210412700

Gunter B., 1998, UNDERSTANDING OLDER

Gyi DE, 2004, APPL ERGON, V35, P443, DOI 10.1016/j.apergo.2004.04.002

Han SH, 2001, INT J IND ERGONOM, V28, P143, DOI 10.1016/S0169-8141(01)00025-7

International Organization for Standardization, 1998, ISO924111

Labib A., 2009, OR INSIGHT, V22, P201, DOI DOI 10.1057/ORI.2009.10

Jokela T., 2004, INTERACTIONS, V11, P28, DOI DOI 10.1145/1029036.1029050

Jones Matt, 2006, MOBILE INTERACTION D

Karavidas M, 2005, COMPUT HUM BEHAV, V21, P697, DOI 10.1016/j.chb.2004.03.012

Khalid HM, 2006, APPL ERGON, V37, P409, DOI 10.1016/j.apergo.2006.04.005

Kiljander H., 2004, EVOLUTION USABILITY

Kim H., 1999, KOREAN MANAG REV, V28, P353

???, 2006, [Journal of the ergonomics society of Korea, ???????], V25, P51

Kline P., 2014, EASY GUIDE FACTOR AN

Kovar M. G., 1992, VITAL HLTH STAT, V28, P1

???, 2004, [Journal of the Korea Gerontological Society, ?????], V24, P1

- Li FZ, 2005, J EPIDEMIOLOG COMMUN H, V59, P558, DOI 10.1136/jech.2004.028399
- Lightner NJ, 2003, ERGONOMICS, V46, P153, DOI 10.1080/0014013021000035280
- Mack Z, 2009, ERGONOMICS, V52, P1514, DOI 10.1080/00140130903197446
- Manton KG, 1997, P NATL ACAD SCI USA, V94, P2593, DOI 10.1073/pnas.94.6.2593
- McDonagh D, 2002, APPL ERGON, V33, P231, DOI 10.1016/S0003-6870(02)00008-X
- McNamara N, 2005, 2005 IEEE International Professional Communication Conference (IPCC), P200
- Melenhorst AS, 2006, PSYCHOL AGING, V21, P190, DOI 10.1037/0882-7974.21.1.190
- Mooi E, 2011, CONCISE GUIDE TO MARKET RESEARCH: THE PROCESS, DATA, AND METHODS USING IBM SPSS STATISTICS, P237, DOI 10.1007/978-3-642-12541-6\_9
- Morrell RW, 2000, HUM FACTORS, V42, P175, DOI 10.1518/001872000779656444
- Moschis GP, 2003, J CONSUM MARK, V20, P516, DOI 10.1108/07363760310499093
- Murata A, 2005, HUM FACTORS, V47, P767, DOI 10.1518/001872005775570952
- National Institute on Aging, 2015, GLOB AG
- Niknam T, 2010, APPL SOFT COMPUT, V10, P183, DOI 10.1016/j.asoc.2009.07.001
- Oh C. O., 2006, ARCHITECTURAL I KOREA, V22, P67
- Paymans TF, 2004, P 9 INT C INT US INT, P301
- Peebles L, 2003, APPL ERGON, V34, P73, DOI 10.1016/S0003-6870(02)00073-X
- Philip K., 1994, MARKETING MANAGEMENT
- Phiriyapokanon T., 2011, THESIS
- PLUMMER JT, 1974, THE JOURNAL OF MARKE, V38, P33
- Pratchett R., 2005, DIGITAL LIFESTYLES
- Rama D.M., 2001, THESIS
- Sanoff H., 2000, COMMUNITY PARTICIPAT
- Sayago S., 2007, P ACM W4A 2007 INT C, P54
- Schaar AK, 2010, LECT NOTES COMPUT SC, V6389, P138
- Scholtz J, 2006, INTERACT COMPUT, V18, P1186, DOI 10.1016/j.intcom.2006.08.014
- Schwarz A, 2007, J ASSOC INF SYST, V8, P231
- SHARIT J, 2004, THE JOURNALS OF GERO, V59, pP305
- Shin W.-K., 2007, THE PROCEEDINGS OF T, P162
- Statistics Korea. (2014), 2014, 2014 STAT ELD
- Sterns R., 1995, CONSUMER ISSUES MATU, P222
- Strategic Business Insights, 2009, VALS SURV
- Stubbs C, 2002, AUST DENT J, V47, P321, DOI 10.1111/j.1834-7819.2002.tb00545.x
- Takano T, 2002, J EPIDEMIOLOG COMMUN H, V56, P913, DOI 10.1136/jech.56.12.913
- Ulrich KT, 2003, PRODUCT DESIGN DEV
- Van Houtven CH, 2004, J HEALTH ECON, V23, P1159, DOI 10.1016/j.jhealeco.2004.04.008
- Voorbij AIM, 2002, APPL ERGON, V33, P105, DOI 10.1016/S0003-6870(01)00028-X
- Wilcox R., 2011, MODERN STAT SOCIAL B
- Wilkowska W, 2009, LECT NOTES COMPUT SC, V5889, P81
- Wood JM, 2002, HUM FACTORS, V44, P482, DOI 10.1518/0018720024497664
- Woodson W.E, 1992, HUMAN FACTORS DESIGN
- Zhang YX, 2005, COMPUT HUM BEHAV, V21, P1, DOI 10.1016/j.chb.2004.02.006
- Cardinal R. N., 2013, ANOVA BEHAV SCI RES
- Zhu HY, 2009, J MARKET MANAG, V25, P295, DOI 10.1362/026725709X429764

NR 77

TC 0

Z9 0

U1 4

U2 4

PU TAYLOR &amp; FRANCIS INC

PI PHILADELPHIA

PA 530 WALNUT STREET, STE 850, PHILADELPHIA, PA 19106 USA

SN 0361-073X

EI 1096-4657

J9 EXP AGING RES

JI Exp. Aging Res.

PY 2017

VL 43

IS 5  
 BP 480  
 EP 511  
 DI 10.1080/0361073X.2017.1369723  
 PG 32  
 WC Geriatrics & Gerontology; Psychology  
 SC Geriatrics & Gerontology; Psychology  
 GA FQ9LF  
 UT WOS:000418682900007  
 PM 28990858  
 DA 2018-05-03  
 ER

PT S

AU Trombley, J  
 Halawa, E

AF Trombley, Jeremy  
 Halawa, Edward

BE Ma, Z  
 Kokogiannakis, G  
 Cooper, P

TI Can further energy reductions be achieved through behaviour changes in  
 low income households?

SO IMPROVING RESIDENTIAL ENERGY EFFICIENCY INTERNATIONAL CONFERENCE, IREE  
 2017

SE Energy Procedia

LA English

DT Proceedings Paper

CT International Conference on Improving Residential Energy Efficiency  
 (IREE)

CY FEB 16-17, 2017

CL Woollongong, AUSTRALIA

SP Univ Woollongong, Sustainable Buildings Res Ctr

DE energy; low income; tropical; behaviour change; barriers; non-energy  
 benefits

ID CONSERVATION; CONSUMPTION

AB Smart Cooling in the Tropics (SCIT) was a project whose main goals were to create energy savings and improve human thermal comfort in low income households located in Darwin, Australia. The project was funded through the Australian Government's Low Income Energy Efficiency Program (LIEEP). The attitudes and behaviours of the 476 participants were investigated through a series of surveys. Each participant was allocated a single, focused treatment based on the results from a home energy assessment. The impediments to energy savings were found to be diverse among participants, so having an individualized treatment plan was necessary to ensure it was appropriate for each participant. One particular aspect of the project that is examined here was the energy savings brought about using education to initiate behaviour changes in participants to reduce their electricity usage. The data collected showed that participants were already actively trying to reduce their consumption through common energy-saving practices before joining SCIT, which were the main energy-saving practices proposed through SCIT, and so further significant reductions through behaviour changes were not likely. At the conclusion of the project, over half of the participants identified a range of barriers still preventing them from additional savings and are described herein. The project was successful in improving thermal comfort levels in participating homes, as demonstrated by over 76% of participants saying they felt cooler/more comfortable because of their involvement. Furthermore, it was found that non-energy benefits were valued higher than energy savings, and improvements in comfort were the most identified and highest rated of all benefits. (C) 2017 The Authors. Published by Elsevier Ltd.

C1 [Trombley, Jeremy] Charles Darwin Univ, Ctr Renewable Energy, Darwin, NT 0909, Australia.

[Halawa, Edward] Charles Darwin Univ, Res Inst Environm & Livelihoods, Darwin, NT 0909, Australia.

RP Trombley, J (reprint author), Charles Darwin Univ, Ctr Renewable Energy, Darwin, NT 0909, Australia.

EM jeremy.trombley@cdu.edu



FU Australian Government's Department of Industry, Innovation and Science through its LIEEP program

FX This work was funded by the Australian Government's Department of Industry, Innovation and Science through its LIEEP program. The authors would like to acknowledge the people at the ECNT's sustainable living program, COOLmob, who delivered the project.

CR Australian Building Codes Board, 2015, CLIM ZON MAP AUSTR W  
 BECKER LJ, 1978, J APPL PSYCHOL, V63, P428, DOI 10.1037/0021-9010.63.4.428  
 BECKER LJ, 1981, ENVIRON BEHAV, V13, P590, DOI 10.1177/0013916581135004  
 Brandon G, 1999, J ENVIRON PSYCHOL, V19, P75, DOI 10.1006/jevp.1998.0105  
 Energy Efficiency Pty Ltd, 2011, 3 SURV RES STANDB PO  
 Energy Efficient Strategies, 2006, 2005 INTR RES STAND  
 Frederiks ER, 2015, ENERGIES, V8, P573, DOI 10.3390/en8010573  
 Lindenberg S, 2007, J SOC ISSUES, V63, P117, DOI 10.1111/j.1540-4560.2007.00499.x  
 Manicaros A., 2016, NT NEWS 0316  
 Poortinga W, 2003, J ECON PSYCHOL, V24, P49, DOI 10.1016/S0167-4870(02)00154-X  
 Shortt N, 2007, HEALTH PLACE, V13, P99, DOI 10.1016/j.healthplace.2005.10.004  
 Steg L, 2008, ENERG POLICY, V36, P4449, DOI 10.1016/j.enpol.2008.09.027  
 Steinborner JL, 2016, SMART COOLING TROPIC  
 Stern PC, 2000, J SOC ISSUES, V56, P407, DOI 10.1111/0022-4537.00175  
 Ugarte U, 2008, PROBABILITY STAT R  
 WINETT RA, 1979, J APPL BEHAV ANAL, V12, P173, DOI 10.1901/jaba.1979.12-173  
 WINKLER RC, 1982, AM PSYCHOL, V37, P421, DOI 10.1037//0003-066X.37.4.421

NR 17

TC 0

Z9 0

U1 0

U2 0

PU ELSEVIER SCIENCE BV

PI AMSTERDAM

PA SARA BURGERHARTSTRAAT 25, PO BOX 211, 1000 AE AMSTERDAM, NETHERLANDS

SN 1876-6102

J9 ENRGY PROCED

PY 2017

VL 121

BP 230

EP 237

DI 10.1016/j.egypro.2017.08.022

PG 8

WC Construction & Building Technology; Energy & Fuels

SC Construction & Building Technology; Energy & Fuels

GA BJ6KG

UT WOS:000426789900030

OA gold

DA 2018-05-03

ER

PT B

AU Xiang, KL

Lin, HY

Chen, BJ

Du, Y

Yan, TY

Shen, Y

Yu, J

AF Xiang, KangLi

Lin, HongYang

Chen, BoJian

Du, Yi  
Yan, TongYu  
Shen, Yu  
Yu, Jing

GP IEEE

TI A Residential End-use Electric Energy Consumption Model Based on the  
Development of Household Appliances

SO 2017 IEEE CONFERENCE ON ENERGY INTERNET AND ENERGY SYSTEM INTEGRATION  
(EI2)

LA English

DT Proceedings Paper

CT IEEE Conference on Energy Internet and Energy System Integration (EI2)

CY NOV 26-28, 2017

CL Beijing, PEOPLES R CHINA

SP IEEE, IEEE Power & Energy Soc, Tsinghua Univ, SEE, Energy Internet Res Inst, Beijing Assoc Sci &  
Technol, Tsinghua Berkeley Shenzhen Inst

DE household appliances; lighting; end-use electric energy consumption

AB Household appliances and lighting devices are the main terminals of electric energy in residential area.

The demand of end-use electric energy is increasing with the development and innovation of household appliances. This paper analyzes the main factors influencing the terminal power consumption, provides a new method to estimate residential end-use electric energy consumption based on the purchase probability model of household appliances and lighting demand model, and optimizes the model according to the survey results in Fujian province, finally through the historical data of Fujian province to verify the model.

C1 [Xiang, KangLi; Lin, HongYang; Du, Yi; Yan, TongYu; Shen, Yu; Yu, Jing] State Grid Fujian Elect Power  
Co Ltd, Power Econ Res Inst, Fuzhou 350000, Fujian, Peoples R China.

[Chen, BoJian] State Grid Fujian Elect Power Co Ltd, Elect Power Res Inst, Fuzhou 350000, Fujian, Peoples  
R China.

RP Xiang, KL (reprint author), State Grid Fujian Elect Power Co Ltd, Power Econ Res Inst, Fuzhou 350000,  
Fujian, Peoples R China.

EM xiangkangli@163.com; 442953110@qq.com

CR Idchabani R, 2013, PROCEEDINGS OF 2013 INTERNATIONAL RENEWABLE AND SUSTAINABLE  
ENERGY CONFERENCE (IRSEC), P357

Li Yuanchun, 2006, RES COMPETITIVENESS, P45

Li Yuan-yuan, 2008, East China Electric Power, V36, P1

Liang Xiaoli, 2015, SMART GRID, V3, P1193

Tsai IT, 2017, 2017 2ND IEEE INTERNATIONAL CONFERENCE ON INTELLIGENT  
TRANSPORTATION ENGINEERING (ICITE), P335, DOI 10.1109/ICITE.2017.8056934

Xin Zhang, 2012, ANAL URBAN RURAL HOU, P58

Yang X., 2007, BUILDING ENERGY EFFI, V35, P7

Ye Zhang, 2009, RES COMPETITIVE CAPA, P14

NR 8

TC 0

Z9 0

U1 0

U2 0

PU IEEE

PI NEW YORK

PA 345 E 47TH ST, NEW YORK, NY 10017 USA

BN 978-1-5386-1427-3

PY 2017

PG 5

WC Energy & Fuels; Engineering, Electrical & Electronic

SC Energy & Fuels; Engineering

GA BJ7UN

UT WOS:000427701301046

DA 2018-05-03

ER

PT S

AU Yan, Y

Kong, QX

Cao, Y

Zhang, XT

Ai, J

Meng, XZ

AF Yan, Yan

Kong, Qionxiang

Cao, Ying

Zhang, Xiaotong

Ai, Jian

Meng, Xiangzhao

BE Cui, P

Liu, J

Zhang, W

TI Investigation on Passive Energy-saving Technologies of Demonstration

Houses in Taohai Pasture

SO 10TH INTERNATIONAL SYMPOSIUM ON HEATING, VENTILATION AND AIR

CONDITIONING, ISHVAC2017

SE Procedia Engineering

LA English

DT Proceedings Paper

CT 10th International Symposium on Heating, Ventilation and Air

Conditioning (ISHVAC)

CY OCT 19-22, 2017

CL Jinan, PEOPLES R CHINA

SP Shandong Univ, Tsinghua Univ, Hong Kong Polytechn Univ, Univ Maryland, Univ Sydney, UiT

DE Rural demonstration house; passive energy-saving technology; energy simulation

AB With the construction of new villages in China, energy-saving technologies for rural buildings have been attracted extensive attention. According to the characteristic of severe cold climate in Hailar, Inner Mongolia, and the structure of rural residential buildings in Taohai Pasture and the energy use customs in these houses, the energy efficiencies of passive energy-saving technologies which are applied to demonstration houses in Taohai Pasture are analyzed. Based on BIM, the calculation models of three types of houses, including the demonstration house applied passive energy-saving technologies, the traditional house and the energy-saving standard model based on local rural residential energy-saving design standard, are established. Then energy simulation software is used to calculate dynamic heating loads of these houses. Furthermore some indexes such as heating load and annual energy consumption per unit building area are compared. The calculated results show that the heating load of the demonstration house in Taohai Pasture is decreased obviously through the passive energy-saving strategies of the thermal insulation of building envelopes, the effective setting of a solar room and the reasonable distribution of indoor functional zones. Compared to the annual heating loads of the traditional house and the energy-saving standard model, that of the demonstration house is reduced about 74.8 % and 28.9%, respectively. The investment increase of the envelope of the demonstration house can be recovered within 11.4 years through the reduction of annual energy use for heating. (c) 2017 The Authors. Published by Elsevier Ltd.

C1 [Yan, Yan; Kong, Qionxiang; Ai, Jian; Meng, Xiangzhao] Xi An Jiao Tong Univ, Grp Bldg Environm & Sustainable Technol, Xian 710049, Shaanxi, Peoples R China.

[Cao, Ying; Zhang, Xiaotong] China Architecture Design Grp, CNERC Human Settlement, Beijing 100044, Peoples R China.

RP Kong, QX (reprint author), Xi An Jiao Tong Univ, Grp Bldg Environm & Sustainable Technol, Xian 710049, Shaanxi, Peoples R China.

EM qxkong@xjtu.edu.cn

FU 12th "Five-Year" National Science and Technology Infra-structure Program

[2013BAL01B03]; Natural Science Basis Research Plan in Shaanxi Province of China [2016JM5077]

FX This work was supported by the 12th "Five-Year" National Science and Technology Infra- structure Program under grant 2013BAL01B03 and by

Natural Science Basis Research Plan in Shaanxi Province of China under grant 2016JM5077.

CR Building Energy Research Center of Tsinghua University, 2014, ANN DEV RES REP CHIN

Cui Y., 2016, PASSIVE TECHNOLOGY S

Hua Z., 2007, J HARBIN I TECHNOLOG

Li X., 2011, SIMULATION ANAL EVAL

Sadineni SB, 2011, RENEW SUST ENERG REV, V15, P3617, DOI 10.1016/j.rser.2011.07.014

Sun HJ, 2015, ENERG BUILDINGS, V96, P251, DOI 10.1016/j.enbuild.2015.03.035

Tong L., 2015, BUILDING SCI

[Anonymous], 2013, GBT508242013

NR 8

TC 0

Z9 0

U1 0

U2 0

PU ELSEVIER SCIENCE BV

PI AMSTERDAM

PA SARA BURGERHARTSTRAAT 25, PO BOX 211, 1000 AE AMSTERDAM, NETHERLANDS

SN 1877-7058

J9 PROCEDIA ENGINEER

PY 2017

VL 205

BP 2910

EP 2917

DI 10.1016/j.proeng.2017.10.091

PG 8

WC Construction & Building Technology; Engineering, Mechanical

SC Construction & Building Technology; Engineering

GA BJ9NP

UT WOS:000429606803011

OA gold

DA 2018-05-03

ER

PT J

AU Zhang, SC

Jiang, YQ

Xu, W

Liu, ZJ

Sun, DY

AF Zhang, Shicong

Jiang, Yiqiang

Xu, Wei

Liu, Zongjiang

Sun, Deyu

TI Key prescriptive parameters analysis of the new china building energy code based on saving to investment ratio methodology

SO INDOOR AND BUILT ENVIRONMENT

LA English

DT Article

DE Building energy code; Key prescriptive parameter; Incremental cost; SIR methodology; Payback period

ID LIFE-CYCLE

AB In this paper, a saving to investment ratio (SIR) method was used to determine the key prescriptive parameters for upgrading the building energy code with different energy reduction ratio requirements, including the U value of walls, roofs and windows; as well as a consideration of the efficiency of boilers and coefficient of performance of water chillers. An economic model for single typical energy saving technologies was established and the relationship between the incremental cost and the payback period of

the different technologies was analysed; then the baseline building model was optimized by these measures in descending order according to the SIR methodology. The model method (SIR) was then applied to case studies in four climate regions of China. A large office reference building situated in Harbin, Beijing, Shanghai and Guangzhou in climate zones from north to south of China was analysed as examples to showcase the relationship between the building energy saving ratio and the incremental cost. The key prescriptive parameter requirements of walls, roofs, windows, chillers and boilers with 5% and 10% energy saving ratios were defined separately for these buildings.

C1 [Zhang, Shicong; Jiang, Yiqiang] Harbin Inst Technol, Dept Bldg Thermal Energy Engrn, Harbin, Peoples R China.

[Zhang, Shicong; Xu, Wei; Liu, Zongjiang; Sun, Deyu] China Acad Bldg Res, Beijing 100013, Peoples R China.

RP Zhang, SC (reprint author), China Acad Bldg Res, Beijing 100013, Peoples R China.

EM zhangshicong01@126.com

FU National Key Technology R&D Programme of China [2014BAJ01B03]

FX The author(s) disclosed receipt of the following financial support for the research, authorship, and/or publication of this article: The authors would like to acknowledge the financial support from the National Key Technology R&D Programme of China's 12th Five-Year Plan target of Key Renewable Energy Utilization to Achieve Higher Energy Efficiency (No. 2014BAJ01B03).

CR Adalberth K, 1997, BUILD ENVIRON, V32, P317, DOI 10.1016/S0360-1323(96)00068-6

Bull J. W., 1993, LIFE CYCLE COSTING C

Chirarattananon S, 2010, ENERGY, V35, P1741, DOI 10.1016/j.energy.2009.12.027

[Anonymous], 2006, DBJ500522006

DECC, 2014, UK NAT EN EFF ACT PL

The Department of Investment and Construction Statistics National Bureau of Statistics, 2001, CHIN STAT YB CONSTR

[Anonymous], 2005, 501892005 GB

HM Government, 2013, L2B HM GOV

Hong TZ, 2009, ENERGBUILDINGS, V41, P426, DOI 10.1016/j.enbuild.2008.11.003

International Energy Agency (IEA), 2012, WORLD EN OUTL

Kari B., 2006, ASIAN J CIVIL ENG BU, V7, P675

Long S., 2004, ENERGBUILDINGS, V36, P1191

Ministry of Housing and Urban- Rural Development, SPEC PLAN BUILD EN E

OECS/ IEA, 2013, MOD BUILD EN COD SEC

Osmani M, 2009, BUILD ENVIRON, V44, P1917, DOI 10.1016/j.buildenv.2009.01.005

Pacific Northwest National Laboratory (PNCI), 2011, ADV EN RETR GUID PRA

Residential Energy Services Network (RESNET), 2013, MORTG IND NAT HOM EN

Scheuer C, 2003, ENERGBUILDINGS, V35, P1049, DOI 10.1016/S0378-7788(03)00066-5

Schlomann B., 2012, ENERGY EFFICIENCY PO

Thornton BA, 2011, 9012010 ASHRAE DEP E

Tulsyan A, 2013, ENERGBUILDINGS, V58, P123, DOI 10.1016/j.enbuild.2012.11.015

Xu LY, 2013, ENERGPOLICY, V57, P253, DOI 10.1016/j.enpol.2013.01.048

NR 22

TC 0

Z9 0

U1 1

U2 4

PU SAGE PUBLICATIONS LTD

PI LONDON

PA 1 OLIVERS YARD, 55 CITY ROAD, LONDON EC1Y 1SP, ENGLAND

SN 1420-326X

EI 1423-0070

J9 INDOOR BUILT ENVIRON

J1 Indoor Built Environ.

PD JAN

PY 2017

VL 26

IS 1

BP 78

EP 91

DI 10.1177/1420326X15625724

PG 14

WC Construction &amp; Building Technology; Engineering, Environmental; Public, Environmental &amp; Occupational Health

SC Construction &amp; Building Technology; Engineering; Public, Environmental &amp; Occupational Health

GA EK7DI

UT WOS:000394085700008

DA 2018-05-03

ER

PT J

AU Dahlmann, F

Veal, G

AF Dahlmann, Frederik

Veal, Gareth

TI THE ROLE OF UMBRELLA AGREEMENTS IN ACHIEVING SUSTAINABILITY GOALS: ENERGY EFFICIENCY AT THE EMPIRE STATE BUILDING

SO JOURNAL OF GREEN BUILDING

LA English

DT Article

DE umbrella agreements; contractual arrangements and sustainability goals; energy service companies; Empire State Building; managing contractual performance risks; energy efficiency and management

ID PERFORMANCE CONTRACTING EPC; TRANSACTION COSTS TCS; BUSINESS MODEL; CORPORATE SUSTAINABILITY; SERVICE CONTRACTS; MANAGEMENT; UNCERTAINTY; PERSPECTIVE; INDUSTRY; RESPONSIBILITY

AB In this paper we investigate whether innovative and flexible contractual arrangements can support the process of achieving ambitious sustainability goals. We explore this question through an analysis of the role of umbrella agreements in driving energy savings in the building sector. Drawing on a case study of the iconic Empire State building, we examine the typical challenges faced by clients and contractors in devising suitable agreements that facilitate managing contractual and performance risks, as well as the sharing of responsibilities and cooperation between multiple project stakeholders. We find that the project arrangements appear to exhibit the adoption of the key characteristics commonly found in umbrella agreements which incorporate sustainability measures that maximize income through efficient delivery of outcomes. Specifically, this means that they need to enable stakeholders to manage repeated review cycles, complex perceptions and expectations, and different tacit assumptions and codes of behaviour, as well as managing and communicating in networks and obtaining agreement also from non-contractual parties. Moreover, we demonstrate that umbrella agreements can facilitate a network perspective of business relationships by emphasizing value co-creation and the embeddedness of firms within a network of interactions.

C1 [Dahlmann, Frederik] Univ Warwick, Warwick Business Sch, Scarman Rd, Coventry CV4 7AL, W Midlands, England.

[Veal, Gareth] Royal United Hosp Bath, Combe Pk Bath, Bath BA1 3NG, Somerset, England.

RP Dahlmann, F (reprint author), Univ Warwick, Warwick Business Sch, Scarman Rd, Coventry CV4 7AL, W Midlands, England.

EM frederik.dahlmann@wbs.ac.uk; Gareth.veal@gmail.com

CR Andersen MS, 2007, SUSTAIN SCI, V2, P133, DOI 10.1007/s11625-006-0013-6

Barnes BR, 2007, IND MARKET MANAG, V36, P662, DOI 10.1016/j.indmarman.2006.04.004

BAZERMAN M. H., 2006, NEGOTIATION, V9

Beddington J, 2008, ENERG POLICY, V36, P4299, DOI 10.1016/j.enpol.2008.08.028

Barquet APB, 2013, IND MARKET MANAG, V42, P693, DOI 10.1016/j.indmarman.2013.05.003

BSRIA, 2014, EN SERV N AM 2014

Colville I, 2010, IND MARKET MANAG, V39, P372, DOI 10.1016/j.indmarman.2009.03.012

Chan E.K., 2001, FACILITIES, V19, P261, DOI DOI 10.1108/02632770110390694

- DeCanio SJ, 1998, ENER G POLICY, V26, P441, DOI 10.1016/S0301-4215(97)00152-3
- DELBRIDGE R., 2013, ORG STUDIES
- [DOE-EERE TEAM U. S. D. O. E. E. E. A. R. E.], 2015, EN SERV CO WHAT IS E
- [DOE-EERE TEAM U. S. D. O. E. E. E. A. R. E.], 2007, ATT J 7 EN SAV PERF
- Du WY, 2013, IEEE T ENG MANAGE, V60, P366, DOI 10.1109/TEM.2012.2206113
- Egging R, 2013, ENER G POLICY, V62, P617, DOI 10.1016/j.enpol.2013.07.022
- Elman C, 2005, INT ORGAN, V59, P293, DOI 10.1017/S0020818305050101
- ESB, 2013, EMP STAT BUILD SCHED
- ESB, 2013, EMP STAT BUILD SUST
- ESB, 2009, LANDM SUST PROGR EMP
- ESB, 2013, EMP STAT BUILD PERF
- EVO, 2002, INT PERF MEAS VER PR, VI
- FELDMAN DC, 1984, ACAD MANAGE REV, V9, P47, DOI 10.2307/258231
- Ford D., 2003, MANAGING BUSINESS RE
- FORD D., 2008, IMP C UPSS
- FRANKEL D., 2013, GIVING US ENERGY EFF
- Fulton M., 2012, US BUILDING ENERGY E
- Gadde LE, 2003, IND MARKET MANAG, V32, P357, DOI 10.1016/S0019-8501(03)00009-9
- Gibbert M, 2008, STRATEGIC MANAGE J, V29, P1465, DOI 10.1002/smj.722
- GLADWIN TN, 1995, ACAD MANAGE REV, V20, P874, DOI 10.2307/258959
- Goldman CA, 2005, ENER G POLICY, V33, P387, DOI 10.1016/j.enpol.2003.08.008
- Holmes S, 2009, R&D MANAGE, V39, P394, DOI 10.1111/j.1467-9310.2009.00569.x
- IEA, 2013, OECD IEA WORLD EN OU
- IEA, 2013, EN EFF MARK REP 2013
- JLL, 2009, COMMUNICATION
- Leek S, 2009, IND MARKET MANAG, V38, P599, DOI 10.1016/j.indmarman.2009.05.013
- Lucio NR, 2013, ENER G POLICY, V59, P182, DOI 10.1016/j.enpol.2013.03.021
- Marshall RS, 2003, CALIF MANAGE REV, V46, P101, DOI 10.2307/41166234
- Mason K, 2011, IND MARKET MANAG, V40, P1032, DOI 10.1016/j.indmarman.2011.06.032
- Miller KD, 2011, STRATEGIC MANAGE J, V32, P139, DOI 10.1002/smj.868
- Montiel I, 2014, ORGAN ENVIRON, V27, P113, DOI 10.1177/1086026614526413
- Mouzas S, 2006, NEGOTIATION J, V22, P279, DOI 10.1111/j.1571-9979.2006.00102.x
- Mouzas S, 2008, IND MARKET MANAG, V37, P167, DOI 10.1016/j.indmarman.2007.01.003
- Mouzas S, 2013, IND MARKET MANAG, V42, P1057, DOI 10.1016/j.indmarman.2013.07.025
- Mouzas S, 2009, IND MARKET MANAG, V38, P495, DOI 10.1016/j.indmarman.2008.09.003
- Mouzas S, 2006, J BUS RES, V59, P1248, DOI 10.1016/j.jbusres.2006.10.001
- Nee V, 1998, AM ECON REV, V88, P85
- Ng ICL, 2013, IND MARKET MANAG, V42, P730, DOI 10.1016/j.indmarman.2013.05.009
- Ng ICL, 2010, J SERV MANAGE, V21, P656, DOI 10.1108/09564231011079084
- Nishant R, 2014, IEEE T ENG MANAGE, V61, P476, DOI 10.1109/TEM.2014.2314703
- NOAA, 2013, DEGR DAY STAT STAT C
- Poppo L, 2002, STRATEGIC MANAGE J, V23, P707, DOI 10.1002/smj.249
- Qian D, 2014, ENER G POLICY, V73, P710, DOI 10.1016/j.enpol.2014.05.013
- Qian QK, 2015, SUSTAINABILITY-BASEL, V7, P3615, DOI 10.3390/su7043615
- Qian QK, 2012, J GREEN BUILD, V7, P116, DOI 10.3992/jgb.7.4.116
- Ragin C.C., 1992, WHAT IS CASE EXPLORI
- Reuer JJ, 2007, STRATEGIC MANAGE J, V28, P313, DOI 10.1002/smj.581
- Rusinko CA, 2007, IEEE T ENG MANAGE, V54, P445, DOI 10.1109/TEM.2007.900806
- Sarkis J, 2013, IEEE T ENG MANAGE, V60, P301, DOI 10.1109/TEM.2013.2253239
- Schaltegger Stefan, 2012, International Journal of Innovation and Sustainable Development, V6, P95, DOI 10.1504/IJISD.2012.046944
- Schleich J, 2008, ENER G ECON, V30, P449, DOI 10.1016/j.eneco.2006.08.004
- Seshadri S, 2013, IND MARKET MANAG, V42, P765, DOI 10.1016/j.indmarman.2013.05.014
- Sitoh MK, 2014, IEEE T ENG MANAGE, V61, P213, DOI 10.1109/TEM.2013.2293731
- Sorrell S, 2007, ENER G POLICY, V35, P507, DOI 10.1016/j.enpol.2005.12.009
- Storbacka K, 2013, IND MARKET MANAG, V42, P705, DOI 10.1016/j.indmarman.2013.05.008
- Storbacka K, 2011, IND MARKET MANAG, V40, P699, DOI 10.1016/j.indmarman.2011.05.003
- Stubbs W, 2008, ORGAN ENVIRON, V21, P103, DOI 10.1177/1086026608318042

Tukker A., 2004, BUSINESS STRATEGY EN, V13, P246, DOI DOI 10.1002/BSE.414  
 UNEP, 2012, GEO5 GLOB ENV OUTL 5  
 Valente M, 2012, ORGAN STUD, V33, P563, DOI 10.1177/0170840612443455  
 Vandermerwe S., 1988, EUROPEAN MANAGEMENT, V6, P314, DOI DOI 10.1016/0263-2373(88)90033-3  
 Whiteman G, 2013, J MANAGE STUD, V50, P307, DOI 10.1111/j.1467-6486.2012.01073.x  
 Woodside A. G., 2010, CASE STUDY RES THEOR  
 Xu PP, 2013, J GREEN BUILD, V8, P177, DOI 10.3992/jgb.8.1.177  
 Xu PP, 2013, HABITAT INT, V37, P104, DOI 10.1016/j.habitatint.2011.12.004  
 Xu PP, 2011, ENERG POLICY, V39, P7389, DOI 10.1016/j.enpol.2011.09.001  
 Yin R.K., 2014, CASE STUDY RES DESIG  
 Zollo M, 2013, ORGAN ENVIRON, V26, P241, DOI 10.1177/1086026613496433

NR 76

TC 0

Z9 0

U1 3

U2 19

PU COLLEGE PUBLISHING

PI GLEN ALLEN

PA 12309 LYNWOOD DR, GLEN ALLEN, VA 23059 USA

SN 1552-6100

EI 1943-4618

J9 J GREEN BUILD

JI J. Green Build.

PD WIN

PY 2016

VL 11

IS 1

BP 73

EP 94

PG 22

WC Architecture

SC Architecture

GA DY1YI

UT WOS:000384889900004

DA 2018-05-03

ER

PT J

AU Aune, M

Godbolt, AL

Sorensen, KH

Ryghaug, M

Karlstrom, H

Naess, R

AF Aune, Margrethe

Godbolt, Asne Lund

Sorensen, Knut H.

Ryghaug, Marianne

Karlstrom, Henrik

Naess, Robert

TI Concerned consumption. Global warming changing household domestication  
 of energy

SO ENERGY POLICY

LA English

DT Article

DE Household energy consumption; Climate change; Domestication; Energy  
 efficiency; Energy culture

ID CLIMATE-CHANGE; LIFE-STYLES; HOME; ATTITUDES; TECHNOLOGIES; INNOVATIONS;



## POLICY

AB This paper addresses possible effects of the growing focus on global warming on households' domestication of energy and the dynamics of energy consumption by comparing data pertaining to the domestication of energy within Norwegian households from two time periods: first, 1991-1995, when climate change was given little public attention, and, second, 2006-2009, after climate change became a major public concern. In the first period, we observed that the domestication of energy resulted in an energy culture emphasizing comfort and convenience with respect to everyday life and the abundant supply of clean hydropower. In the second period, this culture seemed to have changed, making households more concerned about their energy consumption. Consumption of energy was linked to climate change, and many interviewees claimed to save energy. However, the dominant expectation was still to be able to manage everyday life in a convenient and comfortable way. Thus, climate change concerns produced some but not very radical changes in the practical domestication of energy, including energy saving. A main effect was feelings of guilt, tempered by arguments regarding why change is difficult and complaints about political inaction. Thus, public engagement with climate change issues may facilitate energy efficiency policy but to succeed, wider climate policy measures seem to be needed. (C) 2016 Elsevier Ltd. All rights reserved.

C1 [Aune, Margrethe; Godbolt, Asne Lund; Sorensen, Knut H.; Ryghaug, Marianne; Karlstrom, Henrik; Naess, Robert] Norwegian Univ Sci & Technol NTNU, Dept Interdisciplinary Study Culture, N-7491 Trondheim, Norway.

[Godbolt, Asne Lund] SINTEF Byggforsk, POB 124, N-0314 Oslo, Norway.

RP Sorensen, KH (reprint author), Norwegian Univ Sci & Technol NTNU, Dept Interdisciplinary Study Culture, N-7491 Trondheim, Norway.

EM knut.sorensen@ntnu.no

FU Research Council of Norway [178199]

FX The research has been supported by Research Council of Norway, Grant no. 178199. We are very grateful for the useful comments provided by the anonymous referees.

CR Aall C., 2013, MAKING SENSE CONSUMP, P312

Aall C, 2007, GLOBAL ENVIRON POLIT, V7, P83, DOI 10.1162/glep.2007.7.2.83

Abrahamse W, 2005, J ENVIRON PSYCHOL, V25, P273, DOI 10.1016/j.jenvp.2005.08.002

Aune M., 2016, ACTA SOCIOLOG, V12

Aune M., 1998, 34 STS NTNU

Aune M, 2007, ENERG POLICY, V35, P5457, DOI 10.1016/j.enpol.2007.05.007

Barr S, 2006, GEOFORUM, V37, P906, DOI 10.1016/j.geoforum.2006.05.002

Berker T, 2006, DOMESTICATION MEDIA

Biggart NW, 2007, AM BEHAV SCI, V50, P1070, DOI 10.1177/000274207299355

DeCicco J, 2015, ENERG POLICY, V86, P749, DOI 10.1016/j.enpol.2015.08.022

Godbolt AL, 2015, ENERGY RES SOC SCI, V8, P24, DOI 10.1016/j.erss.2015.04.005

Gram-Hanssen K, 2011, J CONSUM CULT, V11, P61, DOI 10.1177/1469540510391725

Gram-Hanssen K, 2010, BUILD RES INF, V38, P175, DOI 10.1080/09613210903541527

Guy S., 2000, SOCIOLOGY ENERGY BUI

Heiskanen E, 2010, ENERG POLICY, V38, P7586, DOI 10.1016/j.enpol.2009.07.002

Heiskanen E, 2010, J IND ECOL, V14, P91, DOI 10.1111/j.1530-9290.2009.00196.x

Howell RA, 2013, GLOBAL ENVIRON CHANG, V23, P281, DOI 10.1016/j.gloenvcha.2012.10.015

Hyysalo S, 2013, ENERG POLICY, V55, P490, DOI 10.1016/j.enpol.2012.12.038

Karlstrom Henrik, 2010, DEREGULERTE FORBRUKE

Karlstrom H, 2014, ENERG POLICY, V67, P656, DOI 10.1016/j.enpol.2013.11.049

Lefebvre Henri, 1971, EVERYDAY LIFE MODERN

Lie M, 1996, MAKING TECHNOLOGY OU

Liste L, 2015, INFORM COMMUN SOC, V18, P733, DOI 10.1080/1369118X.2014.993678

Noppers EH, 2014, GLOBAL ENVIRON CHANG, V25, P52, DOI 10.1016/j.gloenvcha.2014.01.012

Palm J, 2013, ENERG POLICY, V62, P762, DOI 10.1016/j.enpol.2013.08.018

Reichertz J, 2007, SAGE HDB GROUNDED TH, P214

Ryghaug M, 2011, PUBLIC UNDERST SCI, V20, P778, DOI 10.1177/0963662510362657

Shove E, 2003, COMFORT CLEANLINESS

Skjolsvold TM, 2013, LECT N ENERG, V23, P337, DOI 10.1007/978-1-4471-5595-9\_20

Slocum R, 2004, ENVIRON PLANN D, V22, P413, DOI 10.1068/d378

Sorensen Knut H., 2006, DOMESTICATION MEDIA, P40

SOrensen Knut H., 2000, UNDERSTANDING TRUST, P237  
Southerton D., 2004, SUSTAINABLE CONSUMPT  
Sovacool BK, 2015, ENVIRON SCI POLICY, V54, P304, DOI 10.1016/j.envsci.2015.07.011  
Stephenson J, 2010, ENER POLICY, V38, P6120, DOI 10.1016/j.enpol.2010.05.069  
Strengers Y., 2014, J CONSUM CULT, V26  
Thollander P., 2010, ENERGY EFFICIENCY  
Throne-Holst H, 2008, MANAG ENVIRON QUAL, V19, P54, DOI 10.1108/14777830810840363  
Winther T, 2013, ENER EFFIC, V6, P369, DOI 10.1007/s12053-012-9170-x

NR 39

TC 0

Z9 0

U1 1

U2 9

PU ELSEVIER SCI LTD

PI OXFORD

PA THE BOULEVARD, LANGFORD LANE, KIDLINGTON, OXFORD OX5 1GB, OXON, ENGLAND

SN 0301-4215

EI 1873-6777

J9 ENER POLICY

J1 Energy Policy

PD NOV

PY 2016

VL 98

SI SI

BP 290

EP 297

DI 10.1016/j.enpol.2016.09.001

PG 8

WC Economics; Energy & Fuels; Environmental Sciences; Environmental Studies

SC Business & Economics; Energy & Fuels; Environmental Sciences & Ecology

GA EB3WS

UT WOS:000387300300027

DA 2018-05-03

ER

PT J

AU Benitez, I

Diez, JL

Quijano, A

Delgado, I

AF Benitez, Ignacio

Diez, Jose-Luis

Quijano, Alfredo

Delgado, Ignacio

TI Dynamic clustering of residential electricity consumption time series

data based on Hausdorff distance

SO ELECTRIC POWER SYSTEMS RESEARCH

LA English

DT Article

DE Dynamic clustering; Data mining; Load profiles

ID FUZZY C-MEANS

AB As the analysis of electrical loads is reaching data measured from low voltage power distribution networks, there is a need for the main agents involved in the operation and management of the power grids to segment the end users as a function of their shapes of daily energy consumption or load profiles, and to obtain patterns that allow to classify the users in groups based on how they consume the energy. However, this analysis is usually limited to the analysis of single days. Since the smart metering data are time series formed by sequential measurements of energy through each hour or quarter of hour of the day, and also through each day, thanks to the implementation of Advanced Metering Infrastructure (AMI) and

the Smart Grid technologies, it becomes clear that the analysis of the data needs to be extended to consider the dynamic evolution of the consumption patterns through days, weeks, months, seasons, and even years.

This is the objective of the present work. A new framework is presented that addresses the dynamic clustering, visualization and identification of temporal patterns in load profiles time series, fulfilling the detected gap in this area. The present development is a generic framework that allows the clustering and visualization of load profiles time series applying different classical clustering algorithms. A novel dynamic clustering algorithm is also presented, based on an initial segmentation of the energy consumption time series data in smaller surfaces, and the computation of a similarity measure among them applying the Hausdorff distance. Following, these developments are presented and tested on two dataset of energy consumption load profiles from a sample of residential users in Spain and London. (C) 2016 Elsevier B.V. All rights reserved.

C1 [Benitez, Ignacio; Quijano, Alfredo; Delgado, Ignacio] Inst Tecnol Energia, Avda Juan de la Cierva 24, Paterna 46980, Spain.

[Diez, Jose-Luis] Univ Politecn Valencia, Dept Syst Engr & Control, Camino Vera 14, E-46022 Valencia, Spain.

RP Benitez, I (reprint author), Inst Tecnol Energia, Avda Juan de la Cierva 24, Paterna 46980, Spain.

EM ignacio.benitez@ite.es

OI Benitez, Ignacio/0000-0001-7818-7758

FU INGENIO program; CDTI (Technological Development Centre of the Ministry of Science and Innovation of Spain)

FX The data set for the Spanish case used in this work has been provided by the Spanish DSO Iberdrola Distribucion Electrica S.A. as part of the works developed in the Spanish R&D project GAD. The GAD or "Active Demand Management" (in Spanish) project was a project financed by the INGENIO 2010 program and supported by the CDTI (Technological Development Centre of the Ministry of Science and Innovation of Spain).

CR Benitez I, 2014, INT J ELEC POWER, V55, P437, DOI 10.1016/j.ijepes.2013.09.022

Bezdek J. C., 1973, THESIS

Chicco G, 2012, ENERGY, V42, P68, DOI 10.1016/j.energy.2011.12.031

[Anonymous], 2015, TECH REP

DAVIES DL, 1979, IEEE T PATTERN ANAL, V1, P224, DOI 10.1109/TPAMI.1979.4766909

de Oliveira J.V., 2007, ADV FUZZY CLUSTERING

Diez J. L., 2003, THESIS

EC, 2011, FRAMEWORK PROGRAMME

Halkidi M, 2001, J INTELL INF SYST, V17, P107, DOI 10.1023/A:1012801612483

Han J., 2006, DATA MINING CONCEPTS

Hausdorff F., 1914, GRUNDZUGE MENGENLEHR

Izakian H, 2014, NEUROCOMPUTING, V127, P266, DOI 10.1016/j.neucom.2013.08.006

Izakian H, 2013, IEEE T FUZZY SYST, V21, P855, DOI 10.1109/TFUZZ.2012.2233479

Kennedy J, 1995, 1995 IEEE INTERNATIONAL CONFERENCE ON NEURAL NETWORKS PROCEEDINGS, VOLS 1-6, P1942, DOI 10.1109/ICNN.1995.488968

Liao TW, 2005, PATTERN RECOGN, V38, P1857, DOI 10.1016/j.patcog.2005.01.025

MacQueen J.B., 1967, P 5 BERK S MATH STAT, V1, P281, DOI DOI 10.1234/12345678

Sanchez I.B., 2009, EN MARK 2009 EEM 200, P1

XIE XLL, 1991, IEEE T PATTERN ANAL, V13, P841, DOI 10.1109/34.85677

NR 18

TC 0

Z9 0

U1 2

U2 14

PU ELSEVIER SCIENCE SA

PI LAUSANNE

PA PO BOX 564, 1001 LAUSANNE, SWITZERLAND

SN 0378-7796

EI 1873-2046

J9 ELECTR POW SYST RES

J1 Electr. Power Syst. Res.

PD NOV

PY 2016  
 VL 140  
 BP 517  
 EP 526  
 DI 10.1016/j.eprs.2016.05.023  
 PG 10  
 WC Engineering, Electrical & Electronic  
 SC Engineering  
 GA DW3FK  
 UT WOS:000383527300054  
 DA 2018-05-03  
 ER

PT J

AU Luo, T

Pan, JY

Gao, HJ

Jia, HY

AF Luo, Tao

Pan, Ji-Yong

Gao, Hong-Jiang

Jia, Hui-Yan

TI Application Study of Green Building Energy Consumption Analysis Based on  
 BIM Technology

SO JOURNAL OF RESIDUALS SCIENCE & TECHNOLOGY

LA English

DT Article

AB Aimed at the situation of green building design and CAD technology development, this article put forward a new green building design approach-integration of BIM technology and building energy efficiency analysis. The virtual building model created with BIM technology is a electronic database including all of the building's information. Importing this virtual building model to the building energy efficiency analysis application, we can get the energy analysis results quickly and easily.

C1 [Luo, Tao] Longyan Univ, Longyan 364000, Fujian, Peoples R China.

[Pan, Ji-Yong] Minxi Vocat & Tech Coll, Longyan 364000, Fujian, Peoples R China.

[Gao, Hong-Jiang; Jia, Hui-Yan] Ningbo Inst Technol, Ningbo 315100, Peoples R China.

RP Luo, T (reprint author), Longyan Univ, Longyan 364000, Fujian, Peoples R China.

EM lqt1@163.com

FU Doctoral foundation of Longyan University [LB2015003]; Fujian Provincial  
 Department of education Youth Fund [JJZ160327]

FX This work was financially supported by the Fujian Provincial Department  
 of education Youth Fund (JJZ160327), Doctoral foundation of Longyan  
 University (LB2015003).

CR AROUND G, UTILIZAT BUILD INFOR

BARLISH K, 2012, AUTOMATION CONSTRUCT

\*BCA, BCAS BUILD INF MOD R

BETH A, 2006, BUILD INF MODELING

\*CAB OFF, GOV CONSTR STRAT

DAVIS D, BIM BUILD INF MODELI

GANAH A, 2014, COMP CIVIL BUILD ENG

GANDHI S, 2014, COMP CIVIL BUILD ENG

\*GRAPH, ENERGY ANAL ARCHICAD

\*GSA, GEN SERV ADM 3D 4D B

JACOBS P, STATE ART REV WHOLE

\*MCGRAW HILL, 2012, BUS VAL BIM NORTH AM

\*MCGRAW HILL CONST, UND PERC US PATT BIM

MILLER N, 2011, HANGZHOU TENNIS CTR

\*NAT I BUILD SCI, US NAT BUILD INF MOD

\*NBS, NAT BIM REP 2012

SANGUINETTI P, 2012, GEN SYST ARCHITECTUR

\*SEN PROP, SEN PROP BIM REQ ARC

SHEPHERD P, 2011, INT J ARCH COMPUTING

SZUCS A, 2009, BUILDING ENV

\*WIK, BUILD INF MOD

NR 21

TC 0

Z9 0

U1 13

U2 37

PU DESTTECH PUBLICATIONS, INC

PI LANCASTER

PA 439 DUKE STREET, LANCASTER, PA 17602-4967 USA

SN 1544-8053

J9 J RESIDUALS SCI TECH

J I J. Residuals Sci. Technol.

PD OCT

PY 2016

VL 13

IS 4

BP 325

EP 328

DI 10.12783/issn.1544-8053/13/4/10

PG 4

WC Engineering, Environmental

SC Engineering

GA EA4XK

UT WOS:000386619700010

DA 2018-05-03

ER

PT J

AU Mack, B

Tampe-Mai, K

AF Mack, Birgit

Tampe-Mai, Karolin

TI An action theory-based electricity saving web portal for households with an interface to smart meters

SO UTILITIES POLICY

LA English

DT Article

DE Intervention; Smart meter web portal; Action stage model

ID REGULATED BEHAVIORAL-CHANGE; ENERGY-CONSERVATION; SOCIAL NORMS; STAGE MODEL; FEEDBACK; METAANALYSIS; INTERVENTION; DETERMINANTS; CONSUMPTION; INFORMATION

AB The reduction in electricity consumption by private households is an important factor in the process of enhancing the sustainability of energy infrastructures. The information architecture of an action theory based smart meter web portal designed to facilitate electricity saving in private households is described with a focus on intervention techniques that support the transition from each stage of action planning to the next. Users are guided in their migration through the stages by the way information is structured. In order to address the gap between intention and action, the focus is on the support of the implementation of planned behavior. (C) 2016 Elsevier Ltd. All rights reserved.

C1 [Mack, Birgit; Tampe-Mai, Karolin] Univ Stuttgart, ZIRIUS Stuttgart Res Ctr Interdisciplinary Risk &, Seidenstr 36, D-70174 Stuttgart, Germany.

RP Mack, B (reprint author), Univ Stuttgart, ZIRIUS Stuttgart Res Ctr Interdisciplinary Risk &, Seidenstr 36, D-70174 Stuttgart, Germany.

EM birgit.mack@sowi.uni-stuttgart.de;

karolin.tampe-mai@sowi.uni-stuttgart.de

FU Helmholtz Alliance Energy-Trans

FX The smart meter project is funded by the Helmholtz Alliance

Energy-Trans. We would like to express our gratitude towards our partners, the Stadtwerke Heidelberg Energie GmbH and Trianel GmbH, which have provided the households studied with the technical equipment needed and have supported the project in numerous ways.

- CR Abrahamse W, 2005, J ENVIRON PSYCHOL, V25, P273, DOI 10.1016/j.jenvp.2005.08.002  
 Abrahamse W, 2007, J ENVIRON PSYCHOL, V27, P265, DOI 10.1016/j.jenvp.2007.08.002  
 Abrahamse W, 2013, GLOBAL ENVIRON CHANG, V23, P1773, DOI 10.1016/j.gloenvcha.2013.07.029  
 AJZEN I, 1991, ORGAN BEHAV HUM DEC, V50, P179, DOI 10.1016/0749-5978(91)90020-T  
 Allcott H, 2011, J PUBLIC ECON, V95, P1082, DOI 10.1016/j.jpubeco.2011.03.003  
 Allen D., 2006, P ACEEE 2006 SUMM ST, V7, P1  
 Ayres I., 2009, 15386 NBER  
 Bamberg S., 2012, ENV PSYCHOL INTRO, P267  
 Bamberg S, 2007, J ENVIRON PSYCHOL, V27, P14, DOI 10.1016/j.jenvp.2006.12.002  
 Bamberg S, 2013, J ENVIRON PSYCHOL, V34, P151, DOI 10.1016/j.jenvp.2013.01.002  
 Bamberg S, 2013, J ENVIRON PSYCHOL, V33, P68, DOI 10.1016/j.jenvp.2012.10.001  
 Bargh J. A., 1989, UNINTENDED THOUGHT, V3, P3  
 Bargh J. A., 1996, SOCIAL PSYCHOL HDB B, P169  
 BMWI (Federal Ministry for Economic Affairs and Energy), 2015, 5409 BMWI  
 CIALDINI RB, 1990, J PERS SOC PSYCHOL, V58, P1015, DOI 10.1037/0022-3514.58.6.1015  
 Darby S, 2006, EFFECTIVENESS FEEDBA  
 Darby S., 2011, ENGAGING PUBLIC CLIM, P288  
 de Vries H, 2005, PATIENT EDUC COUNS, V56, P154, DOI 10.1016/j.pec.2004.01.002  
 Ehrhardt-Martinez K., 2010, E105 AM COUNC EN EFF  
 Fischer C, 2008, ENERG EFFIC, V1, P79, DOI 10.1007/s12053-008-9009-7  
 Fishbein M., 2010, PREDICTING CHANGING  
 Forster B., 2012, RESULTS RECENT REA B, VB122  
 Fu T., 2012, TRANSPORT RES FORUM  
 Gans W, 2013, ENERG ECON, V36, P729, DOI 10.1016/j.eneco.2012.11.022  
 Gardner B.D., 2008, WHAT DRIVES CAR USE  
 Garling T, 2002, SCAND J PSYCHOL, V43, P1, DOI 10.1111/1467-9450.00263  
 Goldstein NJ, 2007, FRONT SOC PSYCHOL, P167  
 Gollwitzer PM, 2006, ADV EXP SOC PSYCHOL, V38, P69, DOI 10.1013/S0065-2601(06)38002-1  
 Gollwitzer P. M., 1990, HDB MOTIVATION COGNI, V2, P53  
 Hargreaves T, 2013, ENERG POLICY, V52, P126, DOI 10.1016/j.enpol.2012.03.027  
 Hargreaves T, 2010, ENERG POLICY, V38, P6111, DOI 10.1016/j.enpol.2010.05.068  
 HECKHAUSEN H, 1987, MOTIV EMOTION, V11, P101, DOI 10.1007/BF00992338  
 Kelly J., 2013, SMART MACHINES IBM W  
 Kluger AN, 1996, PSYCHOL BULL, V119, P254, DOI 10.1037/0033-2909.119.2.254  
 Locke EA, 2002, AM PSYCHOL, V57, P705, DOI 10.1037//0003-066X.57.9.705  
 Mack B., 2013, UMWELTPSYCHOLOGIE, V17, P27  
 Mack B., 2007, ENERGIESPAREN FORDER  
 McCalley LT, 2002, J ECON PSYCHOL, V23, P589, DOI 10.1016/S0167-4870(02)00119-8  
 Nachreiner M, 2015, ENERGY RES SOC SCI, V9, P85, DOI 10.1016/j.erss.2015.08.016  
 Paetz Alexandra-Gwyn, 2012, Journal of Consumer Policy, V35, P23, DOI 10.1007/s10603-011-9177-2  
 Prochaska JO, 1997, AM J HEALTH PROMOT, V12, P38, DOI 10.4278/0890-1171-12.1.38  
 Prochaska J., 2002, HLTH BEHAV HLTH ED T, P99  
 Pyrko J., 2011, P ECEEE  
 Quack D., 2012, ECO TOP 10  
 Schuitema G., 2013, ENV PSYCHOL INTRO, P255  
 Schultz PW, 2007, PSYCHOL SCI, V18, P429, DOI 10.1111/j.1467-9280.2007.01917.x  
 Schwartz S. H., 1981, ALTRUISM HELP BEHAV, P189  
 Schwarzer R., 2008, APPL PSYCHOL, V57, P1, DOI DOI 10.1111/J.1464-0597.2007.00325.X  
 Thøgersen J, 2010, ENERG POLICY, V38, P7732, DOI 10.1016/j.enpol.2010.08.025  
 German Environmental Agency (UBA), 2015, EN PRIV HAUSH  
 VANHOUWELINGEN JH, 1989, J CONSUM RES, V16, P98, DOI 10.1086/209197  
 Vine D., 2013, OPEN J ENERGY EFFICI, V2, P7, DOI DOI 10.4236/OJEE.2013.21002

NR 52  
TC 0  
Z9 0  
U1 3  
U2 16  
PU ELSEVIER SCI LTD  
PI OXFORD  
PA THE BOULEVARD, LANGFORD LANE, KIDLINGTON, OXFORD OX5 1GB, OXON, ENGLAND  
SN 0957-1787  
EI 1878-4356  
J9 UTIL POLICY  
JI Util. Policy  
PD OCT  
PY 2016  
VL 42  
BP 51  
EP 63  
DI 10.1016/j.jup.2016.05.003  
PG 13  
WC Energy & Fuels; Environmental Sciences; Environmental Studies  
SC Energy & Fuels; Environmental Sciences & Ecology  
GA EC3UE  
UT WOS:000388051500007  
DA 2018-05-03  
ER

PT J  
AU Park, S  
Park, S  
Kang, B  
Choi, MI  
Cho, KH  
Park, S

AF Park, Sanguk  
Park, Sangmin  
Kang, Byeongkwan  
Choi, Myeong-in  
Cho, Keon-hee  
Park, Sehyun

TI Design and implementation of an office standby-power management system through physical and virtual management by user-device habitual pattern analysis in energy-Internet of Things environments

SO INTERNATIONAL JOURNAL OF DISTRIBUTED SENSOR NETWORKS

LA English

DT Article

DE Standby-power management system; energy-IoT (Internet of Things); physical and virtual management

AB In the changing environment of the Internet of Things, optimal energy management in smart spaces requires intelligent and reliable energy-aware-based context sensing and technologies that are capable of recognizing and analyzing the big-data user pattern. In this article, we propose an intelligent and reliable standby power management system. The system uses physical and virtual user behavioral pattern analysis based on energy-aware management to cut-off the standby power of office appliances in the office environment. We propose a two-step priority power-aware method. The first step entails physical perception and management that controls devices through user recognition and device relationship scenarios. The second step is virtual perception and management that controls the standby power by collecting user behavioral patterns and performs an analysis based on a rule mechanism. The proposed system was applied to three locations (offices A, B, and C) in the university test-bed. Power consumption

was reduced to 23% of the original consumption through the elimination of unnecessary standby power consumption.

C1 [Park, Sanguk; Park, Sangmin; Kang, Byeongkwan; Choi, Myeong-in; Cho, Keon-hee; Park, Sehyun] Chung Ang Univ, Sch Elect & Elect Engn, 221 Huksuk Dong, Seoul 156756, South Korea.

RP Park, S (reprint author), Chung Ang Univ, Sch Elect & Elect Engn, 221 Huksuk Dong, Seoul 156756, South Korea.

EM shpark@cau.ac.kr

FU Human Resources Development of the Korea Institute of Energy Technology Evaluation and Planning (KETEP) - Korea government Ministry of Trade, Industry and Energy [20154030200860]; Chung-Ang University Research Scholarship

FX The author(s) disclosed receipt of the following financial support for the research, authorship, and/or publication of this article: This research was supported by a grant from the Human Resources Development (no. 20154030200860) of the Korea Institute of Energy Technology Evaluation and Planning (KETEP) funded by the Korea government Ministry of Trade, Industry and Energy, and by the Chung-Ang University Research Scholarship grants in 2015.

CR Alam S., 2010, P IEEE INT C NETW EM, P1, DOI DOI 10.1109/NESEA.2010.5678060

Chae Bongsug Kevin, 2015, IT Professional, V17, P20, DOI 10.1109/MITP.2015.17

Collotta M, 2015, IEEE J SEL AREA COMM, V33, P2988, DOI 10.1109/JSAC.2015.2481203

Das H, 2014, INT J GRID DISTRIB, V7, P121, DOI 10.14257/ijgcd.2014.7.5.11

Distefano S, 2015, PervasivE Mob Comput, V20, P127, DOI 10.1016/j.pmcj.2014.09.006

Han J, 2007, IEEE T CONSUM ELECTR, V53, P204, DOI 10.1109/TCE.2007.339526

Han J, 2011, IEEE T CONSUM ELECTR, V57, P85, DOI 10.1109/TCE.2011.5735485

Heo J, 2008, IEEE T CONSUM ELECTR, V54, P179, DOI 10.1109/TCE.2008.4470041

Huang V, 2008, P 2 INT C SENS TECHN, P456, DOI [10.1109/SENSORCOMM.2008.23, DOI 10.1109/SENSORCOMM.2008.23]

Khan R, 2012, 10TH INTERNATIONAL CONFERENCE ON FRONTIERS OF INFORMATION TECHNOLOGY (FIT 2012), P257, DOI 10.1109/FIT.2012.53

Khattak A.M., 2010, P IEEE SAINT 2010, P387

Kumar V., 2012, MOVE MEANINGFUL INTE, P272

Lee S, 2011, INFORMATION-TOKYO, V14, P527

Lee S, 2013, IEEE T HUM-MACH SYST, V43, P535, DOI 10.1109/THMS.2013.2285921

Lien C. H., 2006, P ISCE 06, P1

Lien CH, 2007, IEEE T CONSUM ELECTR, V53, P1634, DOI 10.1109/TCE.2007.4429263

McDaniel P, 2009, IEEE SECUR PRIV, V7, P75, DOI 10.1109/MSP.2009.76

Mead Charles N, 2006, J Healthc Inf Manag, V20, P71

Nagarajan M, P INT C WEB SERV, P373

Perera C, 2014, IEEE COMMUN SURV TUT, V16, P414, DOI 10.1109/SURV.2013.042313.00197

Tompros S, 2009, IEEE NETWORK, V23, P8, DOI 10.1109/MNET.2009.5350347

Vermesan O, 2013, RIVER PUBL SER COMM, P7

Yuriyama M, 2010, 13 INT C NETW BAS IN, P1, DOI DOI 10.1109/NBIS.2010.32

Zhang G, 2015, P 2014 INT C MECH CO, P1022

NR 24

TC 0

Z9 0

U1 1

U2 11

PU SAGE PUBLICATIONS INC

PI THOUSAND OAKS

PA 2455 TELLER RD, THOUSAND OAKS, CA 91320 USA

SN 1550-1477

J9 INT J DISTRIB SENS N

JI Int. J. Distrib. Sens. Netw.

PD OCT

PY 2016

VL 12



IS 10  
 AR 1550147716673931  
 DI 10.1177/1550147716673931  
 PG 18  
 WC Computer Science, Information Systems; Telecommunications  
 SC Computer Science; Telecommunications  
 GA EB6IX  
 UT WOS:000387486800009  
 OA gold  
 DA 2018-05-03  
 ER

PT J  
 AU Egwunatum, S  
     Joseph-Akwara, E  
     Akaigwe, R  
 AF Egwunatum, Samuel  
     Joseph-Akwara, Esther  
     Akaigwe, Richard  
 TI OPTIMIZING ENERGY CONSUMPTION IN BUILDING DESIGNS USING BUILDING  
 INFORMATION MODEL (BIM)  
 SO SLOVAK JOURNAL OF CIVIL ENGINEERING  
 LA English  
 DT Article

DE Building Information Modelling; Building energy performance analysis;  
 Sustainability; Energy efficiency

ID CLIMATE-CHANGE; PERFORMANCE; IMPACTS

AB Given the ability of a Building Information Model (BIM) to serve as a multi-disciplinary data repository, this paper seeks to explore and exploit the sustainability value of Building Information Modelling/models in delivering buildings that require less energy for their operation, emit less CO<sub>2</sub> and at the same time provide a comfortable living environment for their occupants. This objective was achieved by a critical and extensive review of the literature covering: (1) building energy consumption, (2) building energy performance and analysis, and (3) building information modeling and energy assessment. The literature cited in this paper showed that linking an energy analysis tool with a BIM model helped project design teams to predict and create optimized energy consumption. To validate this finding, an in-depth analysis was carried out on a completed BIM integrated construction project using the Arboleda Project in the Dominican Republic. The findings showed that the BIM-based energy analysis helped the design team achieve the world's first 103% positive energy building. From the research findings, the paper concludes that linking an energy analysis tool with a BIM model helps to expedite the energy analysis process, provide more detailed and accurate results as well as deliver energy-efficient buildings. The study further recommends that the adoption of a level 2 BIM and the integration of BIM in energy optimization analyse should be made compulsory for all projects irrespective of the method of procurement (government-funded or otherwise) or its size.

C1 [Egwunatum, Samuel] Delta State Polytech, Dept Quant Surveying, Ozoro, Nigeria.

[Joseph-Akwara, Esther] Delta State Polytech, Dept Civil Engn, Ozoro, Nigeria.

[Akaigwe, Richard] Inst Builders, Dept Bldg Plc, Ozoro, Lagos State, Nigeria.

RP Egwunatum, S (reprint author), Delta State Polytech, Dept Quant Surveying, Ozoro, Nigeria.

EM samuelegwunatum@gmail.com

CR Alcorn JA, 1996, RENEW ENERG, V8, P319, DOI 10.1016/0960-1481(96)88869-0

Al-Homoud M. S., 2001, JOURNAL OF BUILDING AND, V36, P421

AUTODESK, 2004, BUILD INF MOD SUST D

Azhar S., 2009, INT J CONSTRUCTION E, V5, P276, DOI 10.1080/15578770903355657

Bazjanac V., 2007, P 10 INT BUILD PERF, P1337

Camilleri M, 2001, BUILD RES INF, V29, P440, DOI 10.1080/09613210110083636

Capper G., 2012, CIBSE ASHRAE TECHN S

Chow WK, 2000, ENERGY, V25, P463, DOI 10.1016/S0360-5442(99)00079-1

Cohen L, 2011, RES METHODS ED

Crosbie T, 2011, AUTOMAT CONSTR, V20, P205, DOI 10.1016/j.autcon.2010.09.018

Eastman C, 2008, BIM HDB GUIDE BUILDI  
Evins R, 2013, RENEW SUST ENERG REV, V22, P230, DOI 10.1016/j.rser.2013.02.004  
Fellows R, 2008, RES METHODS CONSTRUC  
Galloway JN, 2003, BIOSCIENCE, V53, P341, DOI 10.1641/0006-3568(2003)053[0341:TNC]2.0.CO;2  
Hsieh C. C., 2012, ISRN METALLURGY, V2012, P1  
IEA, 2012, WORLD EN OUTL 2012 I  
Krygiel E., 2008, GREENBIM SUCCESSFUL  
Li BZ, 2009, RENEW ENERG, V34, P1994, DOI 10.1016/j.renene.2009.02.015  
Michelle, 2009, BIM BASED BUILDING P  
Naoum S., 2007, DISSERTATION RES WRI  
Perez-Lombard L, 2008, ENERG BUILDINGS, V40, P394, DOI 10.1016/j.enbuild.2007.03.007  
Sanders CH, 2003, BUILD RES INF, V31, P210, DOI 10.1080/0961321032000097638  
Schlueter A, 2009, AUTOMAT CONSTR, V18, P153, DOI 10.1016/j.autcon.2008.07.003  
Stemmers K, 2009, BUILD RES INF, V37, P625, DOI 10.1080/09613210903186661  
U. S. General Service Administration, 2009, INF DEL MAN BIM BAS  
Vijayalaxmi J, 2010, INT ASS SHARING KNOW, V1, P75  
Wong K., 2013, FACILITIES, V31, P138, DOI [10.1108/02632771311299412, DOI 10.1108/02632771311299412]  
Yuan Y, 2011, PROCEDIA ENGINEER, V15, DOI 10.1016/j.proeng.2011.08.987  
NR 28  
TC 0  
Z9 0  
U1 5  
U2 19  
PU DE GRUYTER OPEN LTD  
PI WARSAW  
PA BOGUMILA ZUGA 32A ST, 01-811 WARSAW, POLAND  
EI 1338-3973  
J9 SLOVAK J CIV ENG  
JI SLOVAK J. CIV. ENG.  
PD SEP  
PY 2016  
VL 24  
IS 3  
BP 19  
EP 28  
DI 10.1515/sjce-2016-0013  
PG 10  
WC Engineering, Civil  
SC Engineering  
GA EF8TW  
UT WOS:000390603700003  
OA gold  
DA 2018-05-03  
ER  
  
PT J  
AU Hormazabal, N  
Gillott, M  
Ford, B  
AF Hormazabal, Nina  
Gillott, Mark  
Ford, Brian  
TI The performance and in-use experience of low to zero carbon technologies  
in an experimental energy home  
SO INTERNATIONAL JOURNAL OF LOW-CARBON TECHNOLOGIES  
LA English  
DT Article

DE zero carbon; experimental energy home; LZC; biomass boiler; sustainable home

AB In the UK, finances and resources are invested into the application of new technologies, construction materials and control systems for homes, with the aim of improving energy efficiency. One such example is the experimental BASF house, built to study the thermal performance to achieve a comfortable home that uses energy efficiently. The house includes low to zero carbon (LZC) technologies that are promoted to reach a higher level within the UK Code for Sustainable Homes (CSH). For this study a mixed-methods sequential explanatory design (Creswell JW. *Research Design. Qualitative, Quantitative, and Mixed Methods Approaches*, 3rd edn. Sage Publication, 2009; Nataliya VI, Creswell JW, Stick SL. Using mixed-methods sequential explanatory design: from theory to practice. *Field Methods* 2006; 18: 3) that has been developed in the field of social and behavioural sciences has been applied, consisting of two distinctive phases: quantitative and qualitative. The rationale behind is for the quantitative data and its analysis is used to understand system performances while the qualitative data explain the numerical results in-depth, through the subjects in study, the occupants' perceptions. This article presents conclusions from an investigation into the use and performance of a biomass boiler and passive design features, derived from a live-in experience in a well-insulated and airtight CSH Level 4 home over two consecutive winter periods (2008-9 and 2009-10), which is part of on-going research project. The study also discusses a number of issues regarding the effective efficiency and appropriateness of the systems, which were selected based on a desire to comply with regulations for a better rated home rather than on their user friendliness and comfort for the occupants of a sustainable home; jeopardizing people's safety in times.

C1 [Hormazabal, Nina] Univ Tecn F Santa Maria, Dept Architecture, Ave Espana 1680, Valparaiso, Chile. [Hormazabal, Nina; Gillott, Mark; Ford, Brian] Univ Nottingham, Fac Engr, Dept Architecture & Built Environm, Univ Pk, Nottingham NG7 2RD, England.

RP Hormazabal, N (reprint author), Univ Tecn F Santa Maria, Dept Architecture, Ave Espana 1680, Valparaiso, Chile.; Hormazabal, N (reprint author), Univ Nottingham, Fac Engr, Dept Architecture & Built Environm, Univ Pk, Nottingham NG7 2RD, England.

EM nina.hormazabal@usm.cl

OI Gillott, Mark/0000-0002-4829-8243

CR BASF, 2007, RED CO2 BUILD EN EFF

[Anonymous], 2008, BASF HOUS UK PROJ BA

CIBSE CI of BSE, 2006, ENV DES CIBSE GUID A

Creswell J. W, 2009, RES DESIGN QUALITATI

Ivankova NV, 2006, FIELD METHOD, V18, P3, DOI 10.1177/1525822X05282260

NR 5

TC 0

Z9 0

U1 2

U2 10

PU OXFORD UNIV PRESS

PI OXFORD

PA GREAT CLARENDON ST, OXFORD OX2 6DP, ENGLAND

SN 1748-1317

EI 1748-1325

J9 INT J LOW-CARBON TEC

JI Int. J. Low-Carbon Technol.

PD SEP

PY 2016

VL 11

IS 3

BP 283

EP 295

DI 10.1093/ijlct/ctv006

PG 13

WC Thermodynamics; Energy & Fuels

SC Thermodynamics; Energy & Fuels

GA DW8KV

UT WOS:000383905500001

OA gold

DA 2018-05-03  
ER

PT J

AU Kelly, AR

AF Kelly, Ashley Rose

TI Innovations in Home Energy Use: A Sourcebook for Behavior Change

SO ENERGY RESEARCH & SOCIAL SCIENCE

LA English

DT Book Review

C1 [Kelly, Ashley Rose] Univ Waterloo, Dept English Language & Literature, Hagey Hall Humanities,200  
Univ Ave, Waterloo, ON N2L 3G1, Canada.

RP Kelly, AR (reprint author), Univ Waterloo, Dept English Language & Literature, Hagey Hall  
Humanities,200 Univ Ave, Waterloo, ON N2L 3G1, Canada.

EM arkelly@uwaterloo.ca

OI Mehlenbacher, Ashley Rose/0000-0003-3471-9008

CR SOUTHWELL BG, 2016, INNOVATIONS HOME ENE

NR 1

TC 0

Z9 0

U1 0

U2 1

PU ELSEVIER SCIENCE BV

PI AMSTERDAM

PA PO BOX 211, 1000 AE AMSTERDAM, NETHERLANDS

SN 2214-6296

EI 2214-6326

J9 ENERGY RES SOC SCI

JI Energy Res. Soc. Sci.

PD JUL

PY 2016

VL 17

BP 169

EP 170

DI 10.1016/j.erss.2016.04.003

PG 2

WC Environmental Studies

SC Environmental Sciences & Ecology

GA DQ8CJ

UT WOS:000379436400018

DA 2018-05-03

ER

PT J

AU McGill, G

Oyedele, LO

McAllister, K

Qin, MH

AF McGill, Grainne

Oyedele, Lukumon O.

McAllister, Keith

Qin, Menghao

TI Effective indoor air quality for energy-efficient homes: a comparison of  
UK rating systems

SO ARCHITECTURAL SCIENCE REVIEW

LA English

DT Article

DE sustainable assessment tools; indoor air quality; sustainability

criteria; energy-efficient Homes; UK eco-homes; zero carbon  
 ID ENVIRONMENTAL ASSESSMENT SCHEMES; ASSESSMENT TOOLS; HEALTH; VENTILATION;  
 BUILDINGS; SUSTAINABILITY; SYMPTOMS; FEASIBILITY; ASSOCIATION;  
 REFLECTIONS

AB The use of sustainable assessment methods in the UK is on the rise, anticipating the future regulatory trajectory towards zero carbon by 2016. The indisputable influence of sustainable rating tools on UK building regulations conveys the importance of evaluating their effectiveness in achieving true sustainable design, without adversely effecting human health and well-being. This paper reviews indoor air-quality (IAQ) issues addressed by UK sustainable assessment tools, and the potential trade-offs between building energy conservation and IAQ. The barriers to effective adoption of IAQ strategies are investigated, including recommendations, suggestions, and future research needs. The review identified a fundamental lack of IAQ criteria in sustainable assessment tools aimed at the residential sector. The consideration of occupants' health and well-being should be paramount in any assessment scheme, and should not be overshadowed or obscured by the drive towards energy efficiency. A balance is essential.

C1 [McGill, Grainne; McAllister, Keith; Qin, Menghao] Queens Univ Belfast, Sch Planning Architecture & Civil Engr, Belfast, Antrim, North Ireland.

[Oyedele, Lukumon O.] Univ W England, Bristol Enterprise Res & Innovat Ctr, Frenchay Campus, Coldharbour Lane, Bristol BS16 1QY, Avon, England.

RP Oyedele, LO (reprint author), Univ W England, Bristol Enterprise Res & Innovat Ctr, Frenchay Campus, Coldharbour Lane, Bristol BS16 1QY, Avon, England.

EM l.oyedele@uwe.ac.uk

CR Alvarez Servando, 1996, EUROPEAN COLLABORATI

Alyami SH, 2012, SUSTAIN CITIES SOC, V5, P52, DOI 10.1016/j.scs.2012.05.004

Bluyssen PM, 2010, BUILD ENVIRON, V45, P808, DOI 10.1016/j.buildenv.2009.08.020

Bone A, 2010, PERSPECT PUBLIC HEAL, V130, P233, DOI 10.1177/1757913910369092

Bornehag CG, 2005, INDOOR AIR, V15, P275, DOI 10.1111/j.1600-0668.2005.00372.x

Bornehag CG, 2004, INDOOR AIR, V14, P59, DOI 10.1111/j.1600-0668.2004.00274.x

Boyd David R., 2010, DODGING TOXIC BULLET

Building Research Establishment, 2012, BREEAM MULT 2008

Building Research Establishment, 2006, ECOHOMES 2006 ENV RA

Burroughs H., 2004, MANAGING INDOOR AIR

Burroughs H. E., 2011, MANAGING INDOOR AIR

Carroon J., 2010, SUSTAINABLE PRESERVA

Chao CY, 2001, INDOOR BUILT ENVIRON, V10, P3, DOI 10.1177/1420326X0101000102

Clausen G, 2011, INDOOR AIR, V21, P219, DOI 10.1111/j.1600-0668.2010.00706.x

Clements-Croome D, 2004, INTELLIGENT BUILDING

Cole RJ, 2006, BUILD RES INF, V34, P357, DOI 10.1080/09613210600724624

Cole RJ, 1998, BUILD RES INF, V26, P3, DOI 10.1080/096132198370065

Crawley D, 1999, BUILD RES INF, V27, P300, DOI 10.1080/096132199369417

Crump D., 2009, INDOOR AIR QUALITY H, VNF 18, P1

Dales R, 2008, CAN MED ASSOC J, V179, P147, DOI 10.1053/cmaj.070359

Department of Communities and Local Government (UK), 2010, COD SUST HOM

Dimitroulopoulou C, 2005, VENTILATION AIR TIGH

Dimitroulopoulou C, 2012, BUILD ENVIRON, V47, P109, DOI 10.1016/j.buildenv.2011.07.016

Ding GKC, 2008, J ENVIRON MANAGE, V86, P451, DOI 10.1016/j.jenvman.2006.12.025

El Shenawy A, 2013, BUILD ENVIRON, V60, P202, DOI 10.1016/j.buildenv.2012.10.019

Engvall K, 2005, INDOOR AIR, V15, P120, DOI 10.1111/j.1600-0668.2004.00325.x

Forsberg A, 2004, BUILD ENVIRON, V39, P223, DOI 10.1016/j.buildenv.2003.09.004

GUNBY JA, 1993, HEALTH PHYS, V64, P2, DOI 10.1097/00004032-199301000-00001

Haapio Viitaniemi P, 2008, ENVIRON IMPACT ASSES, V28, P469, DOI DOI 10.1016/J.EIAR.2008.01.002

Haapio A, 2012, ENVIRON IMPACT ASSES, V32, P165, DOI 10.1016/j.eiar.2011.08.002

Harrison PTC, 2002, OCCUP ENVIRON MED, V59, P73, DOI 10.1136/oem.59.2.73

Hui PS, 2006, INDOOR BUILT ENVIRON, V15, P373, DOI 10.1177/1420326X06067866

Kim KH, 2011, J HAZARD MATER, V195, P1, DOI 10.1016/j.jhazmat.2011.08.037

Lee WL, 2008, BUILD ENVIRON, V43, P1882, DOI 10.1016/j.buildenv.2007.11.007

Lee WL, 2013, ENERGBUILDINGS, V62, P403, DOI 10.1016/j.enbuild.2013.03.014

Lee WL, 2012, ENERGBUILDINGS, V45, P326, DOI 10.1016/j.enbuild.2011.11.024

Leyten JL, 2006, ENERGBUILDINGS, V38, P701, DOI 10.1016/j.enbuild.2005.11.001

Marconi M., 1995, AIR QUALITY MONOGRAP, V3  
 McGregor A., 2012, 2 DEGREES BUILT ENV  
 Mendell MJ, 2002, EPIDEMIOLOGY, V13, P296, DOI 10.1097/00001648-200205000-00010  
 Ng ST, 2013, ENVIRON IMPACT ASSES, V38, P131, DOI 10.1016/j.eiar.2012.07.003  
 Nguyen BK, 2011, PROCEDIA ENGINEER, V21, P376, DOI 10.1016/j.proeng.2011.11.2029  
 NOjgaard J K., 2005, TOXICOL LETT, V13, P296  
 Quansah R, 2012, PLOS ONE, V7, DOI 10.1371/journal.pone.0047526  
 Reijnders L., 1999, J CLEAN PROD, V7, P221, DOI [10.1016/S0959-6526(99)00080-3, DOI 10.1016/J.JCLEPRO.2010.04.017]  
 Ridley I., 2006, ASTHMA DUST MITE STU  
 Salthammer T, 2011, CHEMOSPHERE, V82, P1507, DOI 10.1016/j.chemosphere.2010.11.023  
 Sharifi A, 2013, ENVIRON IMPACT ASSES, V38, P73, DOI 10.1016/j.eiar.2012.06.006  
 Singh RK, 2012, ECOL INDIC, V15, P281, DOI 10.1016/j.ecolind.2011.01.007  
 Spengler JD, 2001, INDOOR AIR QUALITY H  
 Sullivan L., 2013, MECH VENTILATION HEA  
 Sundell J, 2004, INDOOR AIR, V14, P51, DOI 10.1111/j.1600-0668.2004.00273.x  
 Tam C. M., 2004, International Journal of Project Management, V22, P563, DOI 10.1016/j.ijproman.2004.03.001  
 Todd JA, 2001, BUILD RES INF, V29, P324, DOI 10.1080/09613210110064268  
 US EPA, 2003, PART POLL YOUR HLTH  
 USGBC, 2010, LEED HOM RAT SYST VE  
 Ward IC, 2008, INT J VENT, V7, P77  
 Wargocki P, 2002, INDOOR AIR, V12, P113, DOI 10.1034/j.1600-0668.2002.01145.x  
 Wasley J, 2000, J ARCHIT EDUC, V53, P207, DOI 10.1162/104648800564617  
 WHO, 2009, WHO GUID IND AIR QUA  
 Yassi A, 2001, BASIC ENV HLTH  
 Yu C, 2010, INDOOR BUILT ENVIRON, V19, P499, DOI 10.1177/1420326X10381106  
 Yu CWF, 2011, INDOOR BUILT ENVIRON, V20, P5, DOI 10.1177/1420326X10397780

NR 63

TC 0

Z9 0

U1 3

U2 18

PU TAYLOR &amp; FRANCIS LTD

PI ABINGDON

PA 2-4 PARK SQUARE, MILTON PARK, ABINGDON OX14 4RN, OXON, ENGLAND

SN 0003-8628

EI 1758-9622

J9 ARCHIT SCI REV

JI Archit. Sci. Rev.

PD MAR 3

PY 2016

VL 59

IS 2

BP 159

EP 173

DI 10.1080/00038628.2015.1078222

PG 15

WC Architecture

SC Architecture

GA DG2PZ

UT WOS:000371911000010

DA 2018-05-03

ER

FN Clarivate Analytics Web of Science

VR 1.0

PT B

AU Anand, R

Raj, H  
AF Anand, Rishi  
Raj, Himanshu  
GP IEEE  
TI Reliable Communication for Sustainable Energy Efficient Low Power Smart  
Home Application (SELSA)  
SO 2016 International Conference on Internet of Things and Applications  
(IOTA)  
LA English  
DT Proceedings Paper  
CT International Conference on Internet of Things and Applications (IOTA)  
CY JAN 22-24, 2016  
CL Maharashtra Acad Engr & Educ Res, Maharashtra Inst Technol, Pune, INDIA  
SP IEEE Pune Sect  
HO Maharashtra Acad Engr & Educ Res, Maharashtra Inst Technol  
DE Internet of Things; Remote Management; Smart Home; ESP8266; MQTT  
Protocol  
ID AGENTS

AB Technology has played a vital role in our living lifestyle. Today Technology is monotonically increasing our comfort level. Using very much efficient Technology that could save energy is what we are looking for. SELSA (Sustainable Energy Efficient Low Power Smart Home Application) is a solution to cut off Energy Wastage and provide users with multiple benefits like Remote Management, Intrusion Detection, Safety Solution and much more. At the same time SELSA uses ESP8266 which is extremely low power consuming hardware and MQTT which is very much lightweight publish-subscribe based messaging protocol to connect to Internet, this makes it very much reliable solution to cut off Energy Wastage and provide other benefits like Remote Management etc. Thus SELSA saves more energy and delivers secure, smart and connected solutions for a home.

C1 [Anand, Rishi; Raj, Himanshu] Univ Petr & Energy Studies, Dehra Dun, Uttarakhand, India.

RP Anand, R (reprint author), Univ Petr & Energy Studies, Dehra Dun, Uttarakhand, India.

EM rishi.anand0@gmail.com; hraj3116@gmail.com

CR Aldrich F. K., 2011, INSIDE SMART HOME, P17

Coulouris George, 2011, DISTRIBUTED SYSTEMS

Dipsis N, 2012, PERVASIVE MOB COMPUT, V8, P562, DOI 10.1016/j.pmcj.2011.10.006

Evans D., 2011, INTERNET THINGS RASP

Evans Dave, 2011, INTERNET THINGS NEXT

Fensel A., 2012, INFORM SPEKTRUM, P1

Fortino G, 2012, COMPUT SCI INF SYST, V9, P1331, DOI 10.2298/CSIS120101030F

Gawade Rohit D., 2014, INT J ELECT COMMUNIC, V5, P79

Gomez C, 2010, IEEE COMMUN MAG, V48, P92, DOI 10.1109/MCOM.2010.5473869

Gubbi J., FUTURE GENERATION CO, P1645

Jahnke JH, 2002, IEEE WIREL COMMUN, V9, P70, DOI 10.1109/MWC.2002.1160084

Reinisch C, 2011, EURASIP J EMBED SYST, V2011, P18

Xie JB, 2009, 2009 4TH IEEE INTERNATIONAL CONFERENCE ON NANO/MICRO ENGINEERED AND MOLECULAR SYSTEMS, VOLS 1 AND 2, P253, DOI 10.1109/NEMS.2009.5068571

Zigssee Alliance, 2010, ZIGBEE HOM AUT PUBL

NR 14

TC 0

Z9 0

U1 0

U2 1

PU IEEE

PI NEW YORK

PA 345 E 47TH ST, NEW YORK, NY 10017 USA

BN 978-1-5090-0044-9

PY 2016

BP 281

EP 285

PG 5

WC Computer Science, Interdisciplinary Applications; Computer Science,  
Theory & Methods  
SC Computer Science  
GA BG5IQ  
UT WOS:000389507100040  
DA 2018-05-03  
ER

PT S

AU Asadi, I

Mahyuddin, N

Shafigh, P

AF Asadi, Iman

Mahyuddin, Norhayati

Shafigh, Payam

BE Kamaruzzaman, SNB

Ali, ASB

Azmi, NFB

Chua, SJL

TI The relation between indoor environmental quality (IEQ) and energy  
consumption in building based on occupant behavior - A review

SO 4TH INTERNATIONAL BUILDING CONTROL CONFERENCE 2016 (IBCC 2016)

SE MATEC Web of Conferences

LA English

DT Proceedings Paper

CT 4th International Building Control Conference (IBCC)

CY MAR 07-08, 2016

CL Kuala Lumpur, MALAYSIA

SP Fac Built Environm, Dept Bldg Surveying, Royal Inst Surveyors Malaysia, Univ Kebangsaan, Univ  
Technol MARA

DE indoor environmental quality (IEQ); energy consumption; human behavior

ID ENVIRONMENTAL-QUALITY; RESIDENTIAL BUILDINGS; SIMULATION; PERFORMANCE;  
ACCEPTANCE; COMFORT; MODEL; HEAT

AB Indoor Environmental Quality (IEQ) is an important topic which impacts on occupant health,  
productivity and also energy consumption in buildings. The four main parameters for IEQ evaluation are:  
Thermal comfort, indoor air quality, visual comfort and aural comfort. The occupant behavior in buildings  
defines as any direct or indirect act which an occupant selects to change the displeasure environmental  
condition into the comfort conditions. The selected behavior by human has a significant impact on the  
energy consumption in buildings. This paper reviews the methods which used to simulate IEQ parameters,  
energy consumption and human behavior in buildings. It aims to promote the idea of more consideration  
about the relation between occupant behavior and energy usage in buildings. This summary of existing  
studies about the importance of human behavior factor in energy simulation software helps to identify  
new methods and strategies for simulating IEQ, Energy and behavior.

C1 [Asadi, Iman; Mahyuddin, Norhayati; Shafigh, Payam] Univ Malaya, Fac Built Environm, Dept Bldg  
Surveying, Kuala Lumpur 50603, Malaysia.

RP Asadi, I (reprint author), Univ Malaya, Fac Built Environm, Dept Bldg Surveying, Kuala Lumpur 50603,  
Malaysia.

EM asadi8564@gmail.com

RI Shafigh, Payam/J-3430-2015; MAHYUDDIN, NORHAYATI/B-9367-2010

OI Shafigh, Payam/0000-0002-8576-3984; MAHYUDDIN,

NORHAYATI/0000-0002-0827-0975; Asadi, Iman/0000-0001-8724-6916

CR Anderson JR, 1998, ATOMIC COMPONENTS TH

Asadi I., INDOOR AIR QUALITY I

Asadi I., 2014, TENAGA NASIONAL APPL

Bourgeois D, 2006, ENER BUILDINGS, V38, P814, DOI 10.1016/j.enbuild.2006.03.002

Brager GS, 1998, ENER BUILDINGS, V27, P83, DOI 10.1016/S0378-7788(97)00053-4

Cao B, 2012, BUILD ENVIRON, V47, P394, DOI 10.1016/j.buildenv.2011.06.022

Card SK, 1983, PSYCHOL HUMAN COMPUT



Citherlet S, 2001, ENER G BUILDINGS, V33, P451, DOI 10.1016/S0378-7788(00)00108-0  
 Clausen G, 2008, HVAC&R RES, V14, P103, DOI 10.1080/10789669.2008.10390996  
 De Giuli V, 2012, BUILD ENVIRON, V56, P335, DOI 10.1016/j.buildenv.2012.03.024  
 Eggleston R. G., 2000, P AIAA FALL S SERIES  
 Freed MA, 1998, SIMULATING HUMAN PER  
 Havenith G, 1999, ANN OCCUP HYG, V43, P289, DOI 10.1093/annhyg/43.5.289  
 Hensen J., 2011, INTRO BUILDING PERFO, P1  
 Hoes P, 2009, ENER G BUILDINGS, V41, P295, DOI 10.1016/j.enbuild.2008.09.008  
 Hygge S, 2001, J ENVIRON PSYCHOL, V21, P291, DOI 10.1006/jevp.2001.0222  
 [Anonymous], 2005, ERG THERM ENV AN DET  
 Just MA, 1999, HUM BRAIN MAPP, V8, P128, DOI 10.1002/(SICI)1097-0193(1999)8:2/3<128::AID-HBM10>3.3.CO;2-7  
 Kashif A, 2013, ENER G BUILDINGS, V56, P85, DOI 10.1016/j.enbuild.2012.09.042  
 Kieras D. E., 1995, P 1 INT S COMM CONTR  
 Lai ACK, 2009, ENER G BUILDINGS, V41, P930, DOI 10.1016/j.enbuild.2009.03.016  
 Langevin J., 2014, HUMAN BEHAV LOW ENER  
 Leaman A, 2007, BUILD RES INF, V35, P662, DOI 10.1080/09613210701529518  
 Malkawi A., 2011, 12 C INT BUILD PERF  
 Hensen J. L., 2015, PREDICTING SATISFACT  
 Olesen B. W., 2012, REHVA J, V49, P6  
 Rijal HB, 2007, ENER G BUILDINGS, V39, P823, DOI 10.1016/j.enbuild.2007.02.003  
 Sierhuis Maarten, 2007, International Journal of Simulation & Process Modelling, V3, P134, DOI 10.1504/IJSPM.2007.015238  
 Simonson CJ, 2002, INDOOR AIR, V12, P243, DOI 10.1034/j.1600-0668.2002.01128.x  
 Standard A., 1992, 55 THERM ENV COND HU  
 Visser R., 1992, VERLICHTING INTERIEU  
 Vorlander M, 2013, J ACOUST SOC AM, V133, P1203, DOI 10.1121/1.4788978  
 WHERRY RJ, 1976, MONITORING BEHAVIOR, P283  
 Wong LT, 2008, BUILD ENVIRON, V43, P1, DOI 10.1016/j.buildenv.2007.01.001  
 Zachary W., 1998, COGNITIVE TASK ANAL, P315  
 Zhang Z, 2009, ATMOS ENVIRON, V43, P319, DOI 10.1016/j.atmosenv.2008.09.041

NR 36

TC 0

Z9 0

U1 0

U2 3

PU E D P SCIENCES

PI CEDEX A

PA 17 AVE DU HOGGAR PARC D ACTIVITES COUTABOEUF BP 112, F-91944 CEDEX A,  
FRANCE

SN 2261-236X

J9 MATEC WEB CONF

PY 2016

VL 66

AR UNSP 00086

DI 10.1051/mateconf/20166600086

PG 6

WC Construction & Building Technology; Engineering, Civil; Materials  
Science, Multidisciplinary

SC Construction &amp; Building Technology; Engineering; Materials Science

GA BG1FS

UT WOS:000386718500084

OA gold

DA 2018-05-03

ER

PT S

AU Bahn, H

AF Bahn, H.

BE Kyriakopoulos, GL

TI Energy-efficient vertical transportation with sensor information in smart green buildings

SO 2016 INTERNATIONAL CONFERENCE ON NEW ENERGY AND FUTURE ENERGY SYSTEM (NEFES 2016)

SE IOP Conference Series-Earth and Environmental Science

LA English

DT Proceedings Paper

CT International Conference on New Energy and Future Energy System (NEFES)

CY AUG 19-22, 2016

CL Beijing, PEOPLES R CHINA

ID SYSTEMS

AB In modern smart green buildings, sensors can detect various physical status of a building such as temperature, humidity, motion, and light, which can be used for smart living services. This paper presents an energy-efficient vertical transportation by making use of indoor sensor technologies. Specifically, sensors detect elevator users before they push the call button, and then inform to the elevator control system through building networks. By using this information, our system generates a reservation call and controls the moving time and direction of each elevator efficiently. Simulation experiments with a variety of traffic situations show that our elevator control system exhibits significantly better performance than the conventional system that does not use sensor information with respect to passengers' waiting time and energy consumption.

C1 [Bahn, H.] Ewha Womans Univ, Dept Comp Sci & Engr, Seoul 120750, South Korea.

RP Bahn, H (reprint author), Ewha Womans Univ, Dept Comp Sci & Engr, Seoul 120750, South Korea.

EM bahn@ewha.ac.kr

CR Addelee MD, 1997, IEEE PERS COMMUN, V4, P35, DOI 10.1109/98.626980

Brand M, 2004, IEEE INT CONF ROBOT, P1002, DOI 10.1109/ROBOT.2004.1307281

Brand M. E., 2004, P 14 INT C VERT TRAN, P1

Brunette W, 2005, P 4 INT S INF PROC S, P388

Christakos Constantine K, 2006, P 15 IST MOB WIR SUM, P134

Doherty L, 2012, MICROWAVE J, V55, P22

Eguchi T, 2004, IEEE C EVOL COMPUTAT, P1661, DOI 10.1109/CEC.2004.1331095

Eliades DG, 2013, BUILD ENVIRON, V63, P114, DOI 10.1016/j.buildenv.2013.02.006

Essa IA, 2000, IEEE PERS COMMUN, V7, P47, DOI 10.1109/98.878538

Gao Y, 2013, BUILD ENVIRON, V70, P223, DOI 10.1016/j.buildenv.2013.08.011

Kidd CD, 1999, LECT NOTES COMPUT SC, V1670, P191

Kim JH, 2001, IEEE T IND ELECTRON, V48, P377, DOI 10.1109/41.915416

Kwon O., 2006, P 1 INT C ADV HYBR I, P362

Lee SJ, 2005, AIP CONF PROC, V772, P639

Orr R. J., 2000, P 2000 C HUM FACT CO, P275

Shimbun N., 2004, ELEVATORS GET SMART

So AT, 1996, ELEVATOR WORLD, V44, P96

Sreedharan P, 2011, BUILD ENVIRON, V46, P438, DOI 10.1016/j.buildenv.2010.08.006

Steinhage A., 2008, P WORKSH BEH MON INT, P15

Strang T, 2007, P INT C ADV INF NETW, P276

WANT R, 1992, ACM T INFORM SYST, V10, P91, DOI 10.1145/128756.128759

NR 21

TC 0

Z9 0

U1 2

U2 3

PU IOP PUBLISHING LTD

PI BRISTOL

PA DIRAC HOUSE, TEMPLE BACK, BRISTOL BS1 6BE, ENGLAND

SN 1755-1307

J9 IOP C SER EARTH ENV

J1 IOP Conf. Ser. Earth Envir. Sci.

PY 2016

VL 40  
AR UNSP 012079  
DI 10.1088/1755-1315/40/1/012079  
PG 10  
WC Energy & Fuels  
SC Energy & Fuels  
GA BG6QE  
UT WOS:000390786400079  
OA gold  
DA 2018-05-03  
ER

PT S  
AU Botticella, F  
De Rossi, F  
Mauro, AW  
Nota, C  
Vanoli, GP  
AF Botticella, F.  
De Rossi, F.  
Mauro, A. W.  
Nota, C.  
Vanoli, G. P.

GP INT INST REFRIGERAT  
TI POTENTIAL ENERGY SAVING AND EMISSIONS REDUCTION USING PROPANE IN AN  
AIR-TO-WATER HEAT PUMP SYSTEM FOR HEATING AND COOLING IN RESIDENTIAL AND  
SERVICE BUILDINGS

SO 12TH IIR GUSTAV LORENTZEN NATURAL WORKING FLUIDS CONFERENCE

SE Refrigeration Science and Technology

LA English

DT Proceedings Paper

CT 12th IIR Gustav Lorentzen Natural Working Fluids Conference

CY AUG 21-24, 2016

CL Heriot Watt Univ, Edinburgh, SCOTLAND

SP Int Inst Refrigerat, J & E Hall Int, Epta, LU VE Grp, Bitzer, Danfuss, Emerson Climate Technol, Yellow Jacket

HO Heriot Watt Univ

DE propane; heat pump; CO2 emissions; TEWI

ID REFRIGERANT CHARGE; HYDROCARBONS; DESIGN

AB As reported in the IEA's report "Energy Technology Perspectives: Scenarios & Strategies to 2050 - IEA 2010", considering the building sector it is expected that the global final energy demand will increase up to 60% and the CO2 emissions will be nearly doubled in 2050. Following the current trends, the global average temperature is expected to rise of 3.6 degrees C in the long-term, as the World Energy Outlook 2014 shows. To reduce the environmental concerns related to the heating and cooling needs in the building sector, the heat pumps represent a valid option.

Being the indirect emissions for these appliances over the 90% of the total one, the improvement of the performance is of primary importance combined to the use of low GWP refrigerants, as the natural ones. Here the potential energy savings and emissions reduction is presented for propane air-to-water heat pumps in comparison to HFC ones, for several final users (apartment block and school building) and climates (warm, cold and average). For a fixed climate condition, changing the fluid and the final user type, through the modeling of the heat pump balanced with the same bivalent temperature, the performance maps are carried out; hence, a model in TRNSYS allows the integration of the energy consumption over the whole year accounting for real climatic data. Finally, the energy consumptions are adjusted with a factor accounting for the partial load operation and the TEWI parameter is used to measure the reduction of the total environmental impact.

C1 [Botticella, F.; De Rossi, F.; Vanoli, G. P.] Sannio Univ, Dept Engn, Corso Garibaldi 107, I-82100 Benevento, Italy.

[Mauro, A. W.; Nota, C.] Univ Naples Federico II, Dept Ind Engn, Ple Tecchio 80, I-80125 Naples, Italy.

RP Mauro, AW (reprint author), Univ Naples Federico II, Dept Ind Engrn, Ple Tecchio 80, I-80125 Naples, Italy.

EM alfonsowilliam.mauro@unina.it

FU project: "SMART CASE - Soluzioni innovative multifunzionali per l'ottimizzazione dei consumi di energia primaria e della vivibilita indoor" [CUP: B58F12000450005]

FX This research was developed as a part of the project: "SMART CASE - Soluzioni innovative multifunzionali per l'ottimizzazione dei consumi di energia primaria e della vivibilita indoor (CUP: B58F12000450005)", which is gratefully acknowledged.

CR Castro JB, 2005, APPL THERM ENG, V25, P2450, DOI 10.1016/j.applthermaleng.2004.12.009

Cavallini A, 2010, INT J REFRIG, V33, P242, DOI 10.1016/j.ijrefrig.2009.10.010

Cervera-Vazquez J., 2015, SIZING BUFFER TANK C

Corberan JM, 2011, ENERG BUILDINGS, V43, P82, DOI 10.1016/j.enbuild.2010.08.017

Corberan J.M., 2002, P 2002 PURD REFR C W, P94

Corberan J. M., 2000, P 4 IIR GUST LOR C N, V1, pB2

Corberan JM, 2008, INT J REFRIG, V31, P748, DOI 10.1016/j.ijrefrig.2007.12.007

European Committee for Standardization, 2013, 14825 EN EUR COM STA

Fernando P, 2004, INT J REFRIG, V27, P761, DOI 10.1016/j.ijrefreg.2004.06.012

Goulart Sandra, 2004, THESIS

Granryd E, 2001, INT J REFRIG, V24, P15, DOI 10.1016/S0140-7007(00)00065-7

Hwang Y., 2002, P IIR IIF COMM B1 B2, P499

IEA (International Energy Agency), 2013, TRANS SUST BUILD STR

International Energy Agency, 2010, EN TECHN PERSP SCEN

International energy agency, 2014, WORLD EN OUTL 2014

Nan X.H., 2000, P 4 IIR G LOR C NAT, P239

Palm B, 2008, INT J REFRIG, V31, P552, DOI 10.1016/j.ijrefrig.2007.11.016

Poggi F, 2008, INT J REFRIG, V31, P353, DOI 10.1016/j.ijrefrig.2007.05.014

Rice C. K., 1997, 3 INT C HEAT PUMPS C, P11

Tammaro M, 2015, INT J REFRIG, V51, P59, DOI 10.1016/j.ijrefrig.2014.12.008

Zangheri P., 2014, ENTRANZE PROJECT DEL

NR 21

TC 0

Z9 0

U1 0

U2 0

PU INT INST REFRIGERATION

PI PARIS

PA 177 BLVD MALESHERBES, F-75017 PARIS, FRANCE

SN 0151-1637

BN 978-2-36215-018-0

J9 REFR SCI T

PY 2016

BP 827

EP 836

DI 10.18462/iir.gl.2016.1136

PG 10

WC Engineering, Mechanical

SC Engineering

GA BH7IC

UT WOS:000402544400101

DA 2018-05-03

ER

PT S

AU Carbonara, E

Tiberi, M

AF Carbonara, Elisa

- Tiberi, Mariagrazia  
 BE Masoero, MC  
 Arsie, I  
 TI Local energy efficiency interventions by the prioritization of thermal zones in an historical university building  
 SO 71ST CONFERENCE OF THE ITALIAN THERMAL MACHINES ENGINEERING ASSOCIATION (ATI 2016)  
 SE Energy Procedia  
 LA English  
 DT Proceedings Paper  
 CT 71st Conference of the Italian-Thermal-Machines-Engineering-Association (ATI)  
 CY SEP 14-16, 2016  
 CL Politecnico Torino, Turin, ITALY  
 SP Italian Thermal Machines Engrn Assoc  
 HO Politecnico Torino  
 DE Building energy performances; costs benefits analysis; energy efficiency  
 ID CHP COMBINED HEAT; NATIONAL-PARKS; MICRO-CHP; PERFORMANCES; HYDROGEN; SYSTEMS; FRAGMENTATION; MANAGEMENT; TURBINES; COMFORT  
 AB Architectural constraints are a crucial aspect in energy retrofitting of historic buildings. Usual global interventions are often not allowed since preserving historical values of the building stock is mandatory. In this paper, the authors provide an alternative procedure by identifying the most profitable local interventions in order to maintain the architectural values during the restoration and energy retrofitting operations. So, thermal zones prioritization is the key element considered in this study. Its aim is to analyse which energy efficiency measures could be applied to a listed building, but at certain technological elements rather than a unique choice for the entire building envelope. Thus it will prove that you can work with individual elements of the building without compromising the protection of architectural good. The attention was placed in promoting single measures and improving the quality of the built environment. The case study is an historical building in Rome, currently used for university purposes. The analysis was carried out through a building simulation model so that to assess the building energy performance before and after the selected interventions. The chosen software is TRNSYS. This approach shows how interventions, usually not applicable at the building scale, would be beneficial if applied at local scale such as a single thermal zone or a single technological unit. The authors built a reference scenario and, for each identified thermal zone, tested the energy efficiency improvement in terms of heating demand reduction coming from the hypothesized local intervention. (C) 2016 The Authors. Published by Elsevier Ltd.  
 C1 [Carbonara, Elisa; Tiberi, Mariagrazia] Sapienza Univ Rome, Dept Astronaut Elect & Energy Engrn DIAEE, Via Eudossiana 18, I-00184 Rome, Italy.  
 RP Carbonara, E (reprint author), Sapienza Univ Rome, Dept Astronaut Elect & Energy Engrn DIAEE, Via Eudossiana 18, I-00184 Rome, Italy.  
 EM elisa.carbonara@uniroma1.it  
 CR Barbarelli S, 2016, ENERGY, V107, P103, DOI 10.1016/j.energy.2016.03.122  
 Bruschi D, 2015, TRANSPORT RES D-TR E, V36, P18, DOI 10.1016/j.trd.2015.02.006  
 Burlando M, 2015, J WIND ENG IND AEROD, V144, P125, DOI 10.1016/j.jweia.2015.04.006  
 Cumo F, 2012, SUSTAIN CITIES SOC, V4, P29, DOI 10.1016/j.scs.2012.03.003  
 de Santoli L, 2016, ENERG BUILDINGS, V129, P549, DOI 10.1016/j.enbuild.2016.08.030  
 de Santoli L, 2015, ENRGY PROCED, V81, P1077, DOI 10.1016/j.egypro.2015.12.130  
 de Santoli L, 2015, RENEW ENERG, V81, P499, DOI 10.1016/j.renene.2015.03.057  
 de Santoli L, 2014, SUSTAIN ENERGY TECHN, V8, P42, DOI 10.1016/j.seta.2014.07.002  
 Di Matteo U, 2016, SUSTAINABILITY, V8, P1  
 Astiaso Garcia D., 2012, WIT T ECOLOGY ENV, V161, P323, DOI [10.2495/ST120261, DOI 10.2495/ST120261]  
 Astiaso Garcia D., 2014, WIT T BUILT ENV, V142, P59  
 Astiaso Garcia D, 2015, INT J SUST DEV WORLD, P10, DOI 10.2495/SDP-V10-N2-155-164  
 Garcia DA, 2016, BUILD ENVIRON, V106, P378, DOI 10.1016/j.buildenv.2016.07.013  
 Garcia DA, 2015, ENRGY PROCED, V82, P674, DOI 10.1016/j.egypro.2015.11.791  
 Garcia DA, 2015, SUSTAINABILITY-BASEL, V7, P12615, DOI 10.3390/su70912615  
 Garcia DA, 2013, CHEM ENGINEER TRANS, V32, P49, DOI 10.3303/CET1332009  
 Guidi G, 2009, CHEM ENGINEER TRANS, V18, P505, DOI 10.3303/CET0918082

Lo Basso G, 2015, ENERGY, V84, P397, DOI 10.1016/j.energy.2015.03.006  
 Lo Basso G, 2016, ENERGY  
 Lo Zupone G, 2016, APPL ENERGY  
 Nastasi B., 2016, ENERGY PROCEDIA  
 Nastasi B, ENERGY PROCEDIA  
 Nastasi B, 2016, ENERGY, V110, P5, DOI 10.1016/j.energy.2016.03.097  
 Nastasi B, 2015, ENRGY PROCED, V82, P944, DOI 10.1016/j.egypro.2015.11.847  
 Nastasi B, 2015, ENRGY PROCED, V81, P1069, DOI 10.1016/j.egypro.2015.12.129  
 Prina MG, 2015, P 10 INT C EC VEH RE  
 Rossi F, 2015, J PHYS CONF SER, V655, DOI 10.1088/1742-6596/655/1/012012  
 Rossi F, 2016, ENER BUILDINGS, V126, P340, DOI 10.1016/j.enbuild.2016.05.036  
 Rossi F, 2015, BUILD ENVIRON, V93, P285, DOI 10.1016/j.buildenv.2015.07.018  
 [Anonymous], 1964, INT CHART CONS REST

NR 30

TC 0

Z9 0

U1 0

U2 0

PU ELSEVIER SCIENCE BV

PI AMSTERDAM

PA SARA BURGERHARTSTRAAT 25, PO BOX 211, 1000 AE AMSTERDAM, NETHERLANDS

SN 1876-6102

J9 ENRGY PROCED

PY 2016

VL 101

BP 988

EP 994

DI 10.1016/j.egypro.2016.11.125

PG 7

WC Thermodynamics; Engineering, Mechanical

SC Thermodynamics; Engineering

GA BH1HC

UT WOS:000398030000125

OA gold

DA 2018-05-03

ER

PT S

AU Case, M

Zhivov, A

Liesen, R

Zhivov, M

AF Case, Michael

Zhivov, Alexander

Liesen, Richard

Zhivov, Michael

GP ASHRAE

TI A Parametric Study of Energy Efficiency Measures Used in Deep Energy

Retrofits for Two Building Types and US Climate Zones

SO ASHRAE TRANSACTIONS, VOL 122, PT 1

SE ASHRAE Transactions

LA English

DT Proceedings Paper

CT ASHRAE Winter Conference

CY JAN 23-27, 2016

CL Orlando, FL

SP ASHRAE

AB One of the critical tasks of the International Energy Agency's Energy Conservation in Buildings and Communities Program's (IEC ECBC's) Annex 61 Business and Technical Concepts for Deep Energy Retrofit (DER) of Public Buildings is to develop bundles of core technologies (measures), which, when applied in major renovation projects to older, pre-1980 buildings, allow site energy reduction by 50% or better compared to the pre-renovation baseline. A short list of these technologies has been generated through analysis of DER projects (Zhivov et al. 2015). Characteristics of some of these "core technologies" depend on technologies available on an individual nation's market, minimum requirements of national standards, and life-cycle cost (LCC) analysis. In addition to these factors, requirements for building envelope-related technologies (e.g., insulation levels, windows), depend on specific climate conditions. This paper presents the results of computational modeling analysis conducted by the U.S. Army Engineer Research and Development Center team to determine the performance potential of the core technologies for two categories of buildings with relatively low internal loads in 15 U.S. climates using the net zero planner tool. This tool enabled simultaneous simulation of multiple building types and multiple technology bundles of energy efficiency measures in different climate zones. This research supported development of requirements for building envelope characteristics and typical equipment best practices for DER projects. Information presented in the paper along with results of similar studies conducted in Denmark, Estonia, Austria, Germany, China, and the UK (Riel et al. 2016; Yao et al. 2016; Zhivov 2016) for their nation-specific climate conditions have been used to develop general guidelines for technology bundles to be used in DER projects (Zhivov et al. 2016). Results of these studies show that 50% of site energy use reduction can be achieved in most climate conditions using a limited number of technologies readily available on the market. It is easier to reduce energy consumption in heating-dominated climates than in climates requiring cooling and humidity control. Additional energy efficiency technologies and measures specific to the building type and use, as well as to specific climate conditions, can further reduce energy use intensity of the building and allow achievement of even higher performance buildings (e.g., passive house standard or even net zero energy).

C1 [Case, Michael; Zhivov, Alexander; Liesen, Richard; Zhivov, Michael] US Army Engineer Res & Dev Ctr, Champaign, IL 61822 USA.

RP Case, M (reprint author), US Army Engineer Res & Dev Ctr, Champaign, IL 61822 USA.

CR ASHRAE, 2010, 9012010 ASHRAE

ASHRAE, 2007, 9012010 ASHRAE

ASHRAE, 2009, 18912009 ASHRAE

ASHRAE, 2010, 6212010 ASHRAE

ASHRAE, 1980, 9011980 ASHRAE

Briggs R. S., 2003, ASHRAE WINT M CHIC I

Case M., 2014, ASHRAE T, V118

Liesen R., 2012, ASHRAE T, V119

Riel J. M., 2016, ASHRAE T, V122

Rose J., 2016, ASHRAE T, V122

EIA, 2012, US EN INF ADM COMM B

USACE, 2013, LIGHTN DES GUID LOW

USACE, 2014, USACE ENG CONSTR B

Yao R., 2016, ASHRAE T, V122

Zhivov A., 2016, ASHRAE T, V122

Zhivov A, 2015, ASHRAE T, V121

NR 16

TC 0

Z9 0

U1 0

U2 0

PU AMER SOC HEATING, REFRIGERATING AND AIR-CONDITIONING ENGS

PI ATLANTA

PA 1791 TULLIE CIRCLE NE, ATLANTA, GA 30329 USA

SN 0001-2505

BN 978-1-939200-25-9

J9 ASHRAE TRAN

PY 2016

VL 122

BP 44

EP 57

PN 1

PG 14

WC Thermodynamics; Construction & Building Technology

SC Thermodynamics; Construction & Building Technology

GA BJ2CO

UT WOS:000418957700004

DA 2018-05-03

ER

PT S

AU Cesena, EAM

Good, N

Mancarella, P

AF Cesena, E. A. Martinez

Good, Nicholas

Mancarella, P.

GP IEEE

TI Energy Efficiency at the Building and District Levels in a Multi-Energy Context

SO 2016 IEEE INTERNATIONAL ENERGY CONFERENCE (ENERGYCON)

SE IEEE International Energy Conference

LA English

DT Proceedings Paper

CT IEEE International Energy Conference (ENERGYCON)

CY APR 04-08, 2016

CL Leuven, BELGIUM

SP IEEE

DE District energy systems; energy efficiency; low carbon technologies; multi-energy systems

ID ENVIRONMENTAL BENEFITS; RETROFIT

AB Increasing environmental concerns are encouraging new building energy efficiency (EE) concepts defined as reductions in net consumption of electricity, heat, gas and/or other energy vectors. Thanks to the smart grid paradigm, this is increasingly being achieved via the installation of low carbon technologies. However, this approach can be severely limited due to the physical and technical constraints of particular buildings (e.g., limited space to install technologies and limited energy network connection capacity). This paper proposes a more effective approach by explicitly including all relevant multi-energy flows in the EE concept and extending its scope to the district level. This paradigm shift allows energy flows to be produced and consumed in the most effective locations. The benefits from extending the scope of different EE concepts (e.g., based on electricity, electricity and heat, and all vectors) from the building to the district level are illustrated with a real UK multi-energy system.

C1 [Cesena, E. A. Martinez; Good, Nicholas; Mancarella, P.] Univ Manchester, Sch Elect & Elect Engr, Elect Energy & Power Syst Grp, Manchester M13 9PL, Lancs, England.

RP Cesena, EAM (reprint author), Univ Manchester, Sch Elect & Elect Engr, Elect Energy & Power Syst Grp, Manchester M13 9PL, Lancs, England.

EM eduardo.martinezcesena@manchester.ac.uk; nicholas.good@manchester.ac.uk; p.mancarella@manchester.ac.uk

CR Ardente F, 2011, RENEW SUST ENERG REV, V15, P460, DOI 10.1016/j.rser.2010.09.022

Beccali M, 2013, RENEW SUST ENERG REV, V27, P283, DOI 10.1016/j.rser.2013.05.040

Capuder T, 2014, ENERGY, V71, P516, DOI 10.1016/j.energy.2014.04.097

Cesena E. A. Martinez, IEEE T SMAR IN PRESS

Cormen T. H., 2003, INTRO ALGORITHMS

DECC, 2012, FUEL MIX DISCL DAT T

Good N., APPL ENERGY IN PRESS

Mancarella P, 2014, ENERGY, V65, P1, DOI 10.1016/j.energy.2013.10.041

Marszal AJ, 2011, ENERG BUILDINGS, V43, P971, DOI 10.1016/j.enbuild.2010.12.022

Marszal A.J., 2009, DCE78 AALB U

Ruparathna R., 2016, RENEW SUST ENERG REV, V53, P1



Sartori I, 2012, ENER G BUILDINGS, V48, P220, DOI 10.1016/j.enbuild.2012.01.032

Stoll P, 2014, ENER G POLICY, V65, P490, DOI 10.1016/j.enpol.2013.10.044

NR 13

TC 0

Z9 0

U1 1

U2 2

PU IEEE

PI NEW YORK

PA 345 E 47TH ST, NEW YORK, NY 10017 USA

SN 2164-4322

BN 978-1-4673-8463-6

J9 IEEE INT ENER CONF

PY 2016

PG 6

WC Energy & Fuels; Engineering, Electrical & Electronic

SC Energy & Fuels; Engineering

GA BG6QX

UT WOS:000390822900058

DA 2018-05-03

ER

PT B

AU Chow, DHC

Sharples, S

AF Chow, D. H. C.

Sharples, S.

BE Wilkinson, SP

Xia, J

Chen, B

TI The feasibility of retrofitting existing office buildings to combat energy consumption due to future climate change in three key regions of China

SO SUSTAINABLE BUILDINGS AND STRUCTURES

LA English

DT Proceedings Paper

CT 1st International Conference on Sustainable Buildings and Structures (ICSBS)

CY OCT 29-31, 2015

CL Xian Jiaotong Liverpool Univ, Suzhou, PEOPLES R CHINA

SP Suzhou Municipal Govt, Suzhou Univ Sci & Technol

HO Xian Jiaotong Liverpool Univ

AB As China goes through the present phase of rapid urbanisation, there is an urgent need to reduce the energy consumption per unit area in buildings in order to mitigate a sudden surge in total energy usage in buildings. At the same time, buildings are expected to last longer, so they will also need to account for effects of future climate change. Much of China's existing buildings are not considered energy-efficient, and retrofitting these buildings to perform in the future would be a much less energy-intensive strategy than demolishing them and building new replacements. This paper aims to investigate the feasibility of retrofitting existing office buildings in three different climate regions of China. These include the "Cold" region in the north, which includes Beijing; the "Hot Summer Mild Winter" region in the south, which includes Guangzhou, and two regions from the "Hot Summer Cold Winter", which includes cities such as Shanghai and Nanjing. Using data from the climate model, HadCM3, Test Reference Years are generated for the 2020s, 2050s and 2080s, for various IPCC future scenarios for these cities, and using computer simulation, the feasibility of retrofitting office buildings to perform in the face of climate change in these regions is investigated. For the "Cold" region, simulation results suggest that energy reductions of up to 30% with improvements to the building enclosure is possible by retrofitting current existing office buildings to the current Chinese National Standard for the region. Retrofitting in the "Hot Summer Mild Winter" region could reduce energy consumption by 45%, but the effects of retrofitting in the "Hot Summer

Cold Winter" region are less profound. Requirements for combating possible increases in energy consumption from heating and cooling demands due to future climate change was also investigated, and it was found that with the exception of Shanghai, by simply improving U-Values of the building envelope to the new national standards, the effects of future climate change can be nullified up to the 2080s. Further improvements to having similar standards as developed countries such as England and Wales will have less significance and may not be able to nullify the effects of climate change from the newly retrofitted office buildings. However, this could be achieved by involving other energy-saving strategies and installing suitable energy-saving technologies for the regions.

C1 [Chow, D. H. C.; Sharples, S.] Univ Liverpool, Sch Architecture, Liverpool, Merseyside, England.

RP Chow, DHC (reprint author), Univ Liverpool, Sch Architecture, Liverpool, Merseyside, England.

CR Belcher S. E., 2005, Building Services Engineering Research & Technology, V26, P49, DOI 10.1191/0143624405bt112oa

Chow DHC, 2010, BUILD SERV ENG RES T, V31, P307, DOI 10.1177/0143624410371284

Fridley D.G., 2008, IBNL248E

Gordon C, 2000, CLIM DYNAM, V16, P147, DOI 10.1007/s003820050010

Hong TZ, 2009, ENERG BUILDINGS, V41, P426, DOI 10.1016/j.enbuild.2008.11.003

Nakicenovic N., 2000, EMISSIONS SCENARIOS

Qian Y., 2010, CHINA DAILY

WMO and UNEP, 2001, IPCC CLIM CHANG 2001, P63

Wu Y., 2003, CHINA BUILDING ENERG

Zheng Y., 2007, ENV EC, V11, P23

Zhong J., 2007, SOL ENERGY, V5, P40

Zhou N., 2007, 8 ECEEE SUMM STUD LA, P1065

Zhu YX, 2004, ENERG BUILDINGS, V36, P1287, DOI 10.1016/j.enbuild.2003.11.007

NR 13

TC 0

Z9 0

U1 1

U2 2

PU CRC PRESS-TAYLOR & FRANCIS GROUP

PI BOCA RATON

PA 6000 BROKEN SOUND PARKWAY NW, STE 300, BOCA RATON, FL 33487-2742 USA

BN 978-1-315-64713-5; 978-1-138-02898-2

PY 2016

BP 139

EP 147

PG 9

WC Architecture; Construction & Building Technology; Engineering, Civil

SC Architecture; Construction & Building Technology; Engineering

GA BF9OP

UT WOS:000385791200019

DA 2018-05-03

ER

PT S

AU Croitoru, C

Nastase, I

Sandu, M

Lungu, C

AF Croitoru, Cristiana

Nastase, Ilinca

Sandu, Mihnea

Lungu, Catalin

BE Damian, RM

TI Multi-criteria design and impact on energy consumption of a residential house- a parametric study

SO EENVIRO-YRC 2015 - BUCHAREST

SE Energy Procedia

LA English

DT Proceedings Paper

CT Conference on Sustainable Solutions for Energy and Environment (EENVIRO  
- YRC)

CY NOV 18-20, 2015

CL Bucharest, ROMANIA

SP Tech Univ Civil Engn, Fac Bldg Serv Engn

DE Energy consumption; energy efficiency; bioclimatic design; numerical  
simulation

ID CLIMATE ZONES; PERFORMANCE; BUILDINGS

AB High energy consumption problem has become increasingly acute human needs. Domestic heating in winter involves considerable expenses, so the idea of energy conservation and the need to implement reliable and innovative solutions in the field of energy in constructions emerged. Given these constraints, a judicious approach of the built environment is the study of energy consumption starting from the concept phase. This paper presents a parametric study regarding impact on energy consumption for different factors and the weighing associated. The analysis has been performed using an energy simulation program, which is able to provide a complex analysis of the thermal behavior of the building for different cases. The thermal behavior of a building should be the result of a multi-criteria optimization, considering both thermal comfort and energy savings. The purpose was to determine for each climatic zone when it is ineffective to increase the thermal resistance of the envelope element and the gain in energy economy begins to be insignificant. From these results we have chosen the optimal case for certain characteristics of glazed and opaque elements analyzing which is the best orientation for this case, considering both, heating and cooling load. The study indicated an optimal configuration of the envelope elements and optimal orientation of the building in order to reach the passive house level, demonstrating the necessity of such a step from the design phase. (C) 2015 The Authors. Published by Elsevier Ltd.

C1 [Croitoru, Cristiana; Nastase, Ilinca; Sandu, Mihnea; Lungu, Catalin] Tech Univ Civil Engn Bucharest, Fac Bldg Serv, CAMBI Res Ctr, Bucharest, Romania.

RP Croitoru, C (reprint author), Tech Univ Civil Engn Bucharest, Fac Bldg Serv, CAMBI Res Ctr, Bucharest, Romania.

EM cristiana.croitoru@cambi.ro

CR BPiE (Buildings Performance Institute Europe), 2011, EUROPE'S BUILDINGS MI

Croitoru C., 2014, 14 SGEM GEOCONFERENC, V1

E. Commission, 2009, LOW EN BUILD EUR CUR, P18

Fang ZS, 2014, ENER BUILDINGS, V77, P197, DOI 10.1016/j.enbuild.2014.03.030

F.f.e.e.b. (FEBY), 2009, SPEC PASS HOUS

Feist J. S. W., 2005, ENERGY BUILD, V37, P1186

Feist J. W. Wolfgang, 1994, ENERGIEKENNWERTE PAS

Feist Wolfgang, 2007, WHAT IS PASSIVE HOUS

Giacobbe M, 2015, COMPUT NETW, V91, P438, DOI 10.1016/j.comnet.2015.08.031

Ioannou A, 2015, ENER BUILDINGS, V92, P216, DOI 10.1016/j.enbuild.2015.01.055

Janson U., 2010, PASSIVE HOUSES SWEDEN

TURISMULUI M. C. S., 2005, NORM PRIV CALC TERM

P. H. Institute, 2015, PASS HOUS PLANN PACK

Rong AY, 2016, RENEW SUST ENER REV, V53, P363, DOI 10.1016/j.rser.2015.08.060

Schnieders J, 2015, ENER BUILDINGS, V105, P71, DOI 10.1016/j.enbuild.2015.07.032

[Anonymous], 190711997 SR

Zhao M, 2015, ENER BUILDINGS, V96, P64, DOI 10.1016/j.enbuild.2015.03.007

NR 17

TC 0

Z9 0

U1 0

U2 6

PU ELSEVIER SCIENCE BV

PI AMSTERDAM

PA SARA BURGERHARTSTRAAT 25, PO BOX 211, 1000 AE AMSTERDAM, NETHERLANDS

SN 1876-6102

J9 ENRGY PROCED

PY 2016

VL 85  
 BP 141  
 EP 148  
 DI 10.1016/j.egypro.2015.12.284  
 PG 8  
 WC Energy & Fuels  
 SC Energy & Fuels  
 GA BE9NY  
 UT WOS:000377911100017  
 OA gold  
 DA 2018-05-03  
 ER

PT J  
 AU Furtuna, TF  
 Reveiu, A  
 Dardala, M  
 Smeureanu, I  
 AF Furtuna, Titus Felix  
 Reveiu, Adriana  
 Dardala, Marian  
 Smeureanu, Ion

TI IDENTIFYING CONSUMERS' PROFILES CONCERNING RESIDENTIAL LIGHTING  
 SO ECONOMIC COMPUTATION AND ECONOMIC CYBERNETICS STUDIES AND RESEARCH

LA English

DT Article

DE correspondence analysis; classification; clusters; types of consumers;  
 bulbs

ID ENERGY; ROMANIA

AB Reducing electricity consumption, by decreasing residential lighting, falls in the range of measures aimed to save 20% of primary energy consumption in European Union, up to 2020, and further to improve energy efficiency after 2020. Public lighting and appliances is about 14 % of total electricity consumption, in Romania. New energy efficient lighting technologies might contribute to a substantial decreasing of household electricity consumption. Data set used to apply the scientific methodology presented in the paper was gathered in a survey research, aiming to investigate Romanians attitude and behavior about lighting consumption in households. The goals of this research paper are both to identify the factors associated with the replacement of old incandescent lamps, with the new energy efficient compact fluorescent lamps and light emitting diodes, and to identify Romanian typologies of consumers and the patterns of their behavior. In order to accomplish the research goals, a model of analysis, based on Cluster Analysis and Multiple Correspondence Analysis methods has been proposed in the paper.

C1 [Furtuna, Titus Felix; Reveiu, Adriana; Dardala, Marian; Smeureanu, Ion] Bucharest Univ Econ Studies, Bucharest, Romania.

RP Furtuna, TF (reprint author), Bucharest Univ Econ Studies, Bucharest, Romania.

EM titus@ase.ro

FU Swiss Enlargement Contribution in the framework of the Romanian-Swiss  
 Research Programme [IZERZ0\_142217]

FX This work was supported by the Swiss Enlargement Contribution in the  
 framework of the Romanian-Swiss Research Programme (Grant  
 IZERZ0\_142217).

CR Benzecri J.-P., 1973, ANAL DONNEES, VII

Bertoldi P, 2012, ELECT CONSUMPTION EF

D'Ambra L., 1992, STAT APPL, V4, P511

Di Maria C, 2010, SCOT J POLIT ECON, V57, P48, DOI 10.1111/j.1467-9485.2009.00506.x

Greenacre M., 2007, CORRES ANAL PRACTICE

Greenacre M.J., 2006, MULTIPLE CORRES ANAL

IEA, 2010, PHAS OUT INC LAMPS I

Kanala R., 2013, P C EN SUST 2013 SUS

Kumar A, 2003, ENERG POLICY, V31, P259, DOI 10.1016/S0301-4215(02)00038-1

Mills B., 2013, S52013 FRAUNH ISI  
 Mills B, 2014, ENERG ECON, V46, P151, DOI 10.1016/j.eneco.2014.08.022  
 Renisio Y., 2014, GENESES, V4, P109  
 Reveiu A, 2015, PROCEDIA COMPUT SCI, V52, P812, DOI [10.1016/j.procs.2015.05.137,  
 10.1016/j.procs.2015.05.137]  
 Roberta S., 1992, STATISTICAAPLICATA, V4  
 Roman T, 2015, SUSTAINABILITY-BASEL, V7, P6394, DOI 10.3390/su7066394  
 Scott S, 1997, ENERG ECON, V19, P187, DOI 10.1016/S0140-9883(96)01000-6  
 VITO, 2009, PREP STUD EC REQ EUP  
 NR 17  
 TC 0  
 Z9 0  
 U1 0  
 U2 5  
 PU ACAD ECONOMIC STUDIES  
 PI BUCHAREST  
 PA 15-17 CALEA DOROBANTI, SECTOR 1, BUCHAREST, 00000, ROMANIA  
 SN 0424-267X  
 EI 1842-3264  
 J9 ECON COMPUT ECON CYB  
 JI Econ. Comput. Econ. Cybern. Stud.  
 PY 2016  
 VL 50  
 IS 1  
 BP 23  
 EP 38  
 PG 16  
 WC Economics; Mathematics, Interdisciplinary Applications  
 SC Business & Economics; Mathematics  
 GA DH0MR  
 UT WOS:000372478800002  
 DA 2018-05-03  
 ER  
  
 PT S  
 AU Irmak, E  
     Kose, A  
     Gocmen, G  
 AF Irmak, Erdal  
     Kose, Ali  
     Gocmen, Gokhan  
 GP IEEE  
 TI Simulation and ZigBee Based Wireless Monitoring of the Amount of  
     Consumed Energy at Smart Homes  
 SO 2016 IEEE INTERNATIONAL CONFERENCE ON RENEWABLE ENERGY RESEARCH AND  
     APPLICATIONS (ICRERA)  
 SE International Conference on Renewable Energy Research and Applications  
 LA English  
 DT Proceedings Paper  
 CT 5th IEEE International Conference on Renewable Energy Research and  
     Applications (ICRERA)  
 CY NOV 20-23, 2016  
 CL Birmingham, ENGLAND  
 SP IEEE, IEEE PELS, Int Journal Renewable Energy Res, IEEE Ind Applicat Soc, IEEE IES, IEEJ, IEICE  
     Commun Soc, KSoftware  
 DE Electrical household appliances; energy monitoring; Simulink;  
     MATLAB/GUI; ZigBee

AB Smart homes can be defined as homes which can satisfy the needs of comfort with the help of wireless modules. The smart home technologies make the daily life easier and offers safer, more comfortable and economic life spaces. The smart home systems allow the user to monitor and also control all electronic and electrical devices in the house. In this study, a MATLAB/GUI based graphical interface has been prepared in order to monitor the energy consumption of electrical devices used in the home. Additionally a Simulink model of the system has been created on the basis of standard energy consumption data of real devices. This is a sample simulation and not using real data. Energy consumption data of household electrical appliances with different consumption values can be monitored numerically and graphically via this interface. This study focuses on the alternative usages of ZigBee wireless sensor networks in smart home automation system.

C1 [Irmak, Erdal; Gocmen, Gokhan] Gazi Univ, Elect & Elect Engn Dept, Fac Technol, Ankara, Turkey.  
[Kose, Ali] Gazi Univ, Tech Sci Vocat Colleague, Ankara, Turkey.

RP Irmak, E (reprint author), Gazi Univ, Elect & Elect Engn Dept, Fac Technol, Ankara, Turkey.

EM erdal@gazi.edu.tr; alikose@gazi.edu.tr

CR Ajgaonkar P., 2010, THESIS, P15

Aziz N H A, 2010, Proceedings 2010 Second International Conference on Computational Intelligence, Modelling and Simulation (CIMSIM 2010), P470, DOI 10.1109/CIMSIM.2010.74

Bai Y. W., 2008, P IEEE INT S CONS EL, P1

Bilgin BE, 2012, COMPUT NETW, V56, P2196, DOI 10.1016/j.comnet.2012.03.002

Callaway E., 2002, IEEE COMM MAGAZINE, V40

Dener M, 2015, WORLD CONFERENCE ON TECHNOLOGY, INNOVATION AND ENTREPRENEURSHIP, P1898, DOI 10.1016/j.sbspro.2015.06.193

Hyncica O., 2006, P 2 INT S COMM CONTR

Jian-Jian Wang, 2010, 2010 International Conference on Machine Learning and Cybernetics (ICMLC 2010), P1041, DOI 10.1109/ICMLC.2010.5580627

Monisha J, 2016, INT J INNOVATIVE RES, V5

Labiot H., 2007, WI FITM BLUETOOTHM

Rao V. P., 2005, THESIS, P85

Sarijari M. A. B., 2008, IEEE 6 NAT C TEL TEC

Seong Peng Lim, 2011, 2011 IEEE Colloquium on Humanities, Science and Engineering (CHUSER 2011), P327, DOI 10.1109/CHUSER.2011.6163743

Tsang KF, 2007, 14TH INTERNATIONAL CONFERENCE ON MECHATRONICS AND MACHINE VISION IN PRACTICE 2007, PROCEEDINGS, P252, DOI 10.1109/MMVIP.2007.4430752

Uguz S., 2013, 6 S CONTR AUT BUILD

Zou ZY, 2011, PROCEDIA ENGINEER, V15, DOI 10.1016/j.proeng.2011.08.284

NR 16

TC 0

Z9 0

U1 0

U2 0

PU IEEE

PI NEW YORK

PA 345 E 47TH ST, NEW YORK, NY 10017 USA

SN 2377-6897

BN 978-1-5090-3388-1

J9 INT CONF RENEW ENERG

PY 2016

BP 1019

EP 1023

PG 5

WC Energy & Fuels

SC Energy & Fuels

GA BI1HP

UT WOS:000405929800173

DA 2018-05-03

ER

PT B

AU Khosrowpour, A

Duzener, T

Taylor, JE

AF Khosrowpour, Ardalan

Duzener, Tugce

Taylor, John E.

BE Perdomo-Rivera, JL

Gonzalez-Quevedo, A

Lopez DelPuerto, C

Maldonado-Fortunet, F

Molina-Bas, OI

TI Meta-Analysis of Eco-Feedback-Induced Occupant Energy Efficiency

Benchmarked with Standard Building Energy Rating Systems

SO CONSTRUCTION RESEARCH CONGRESS 2016: OLD AND NEW CONSTRUCTION

TECHNOLOGIES CONVERGE IN HISTORIC SAN JUAN

LA English

DT Proceedings Paper

CT Construction Research Congress

CY MAY 31-JUN 02, 2016

CL Univ Puerto Rico Mayaguez, Dept Civil Engr & Surveying, Construct Engr &

M, San Juan, PR

SP Amer Soc Civil Engineers, Construct Inst, Construct Res Council

HO Univ Puerto Rico Mayaguez, Dept Civil Engr & Surveying, Construct Engr & M

ID ELECTRICITY CONSUMPTION; SOCIAL-INFLUENCE; BEHAVIOR; CONSERVATION;

IMPACT; INFORMATION; SAVINGS; NORMS; POWER

AB Recent technological advancements have enabled energy efficiency building through automation, equipment upgrade, and material improvement. These enhancements are mostly focused on centrally controllable units such as HVAC, lighting systems, and equipment, while miscellaneous energy loads (e.g., plug loads) that are mostly controlled by occupants, are not as efficiently managed. Various energy rating systems, such as LEED (R) grade the mechanical and electrical equipment in buildings. However, the fact that people spend more than 90% of their time indoors, suggests a great opportunity to help buildings reach a higher level of efficiency by monitoring and quantifying occupants' energy-use. In this paper, we review the existing literature on occupant energy efficiency programs in residential and commercial buildings, and benchmark the potential of such programs to impact LEED rating systems. The main contribution of this paper is comparing the current occupant energy efficiency programs' potential against standard industry measures (i.e., LEED (R)). The results report a possible potential impact for residential building occupant energy efficiency, while indicating the lack of adequate reference and reliable measurement for the commercial sector. The details of the methodology, data analysis, and results are discussed in the paper along with future avenues of occupant-oriented energy efficiency research.

C1 [Khosrowpour, Ardalan; Duzener, Tugce; Taylor, John E.] Virginia Tech, Via Dept Civil & Environm Engr, 750 Drillfield Ave, Blacksburg, VA 24061 USA.

RP Khosrowpour, A (reprint author), Virginia Tech, Via Dept Civil & Environm Engr, 750 Drillfield Ave, Blacksburg, VA 24061 USA.

EM ardalan@vt.edu; tugce1@vt.edu; jet@vt.edu

CR Alahmad MA, 2012, IEEE T IND ELECTRON, V59, P2002, DOI 10.1109/TIE.2011.2165456

Allcott H, 2011, J PUBLIC ECON, V95, P1082, DOI 10.1016/j.jpubeco.2011.03.003

Asensio OI, 2015, P NATL ACAD SCI USA, V112, pE510, DOI 10.1073/pnas.1401880112

Ayres I, 2013, J LAW ECON ORGAN, V29, P992, DOI 10.1093/jleo/ews020

Belzer D., 2009, ENERGY EFFICIENCY PO

Carrico AR, 2011, J ENVIRON PSYCHOL, V31, P1, DOI 10.1016/j.jenvp.2010.11.004

Chen HM, 2012, ENERG BUILDINGS, V45, P106, DOI 10.1016/j.enbuild.2011.10.029

Coleman MJ, 2013, BUILD RES INF, V41, P637, DOI 10.1080/09613218.2013.808958

Delmas MA, 2014, J ENVIRON ECON MANAG, V67, P353, DOI 10.1016/j.jeem.2013.12.009

Erickson T., P SIGCHI C HUM FACT, P1203

Faruqui A, 2010, ENERGY, V35, P1598, DOI 10.1016/j.energy.2009.07.042

Foster D, P 6 NORD C HUM COMP, P178

Gronhoj A, 2011, INT J CONSUM STUD, V35, P138, DOI 10.1111/j.1470-6431.2010.00967.x

Gulbinas R, 2014, ENERG BUILDINGS, V84, P493, DOI 10.1016/j.enbuild.2014.08.017

Jain RK, 2013, ENER G BUILDINGS, V66, P119, DOI 10.1016/j.enbuild.2013.06.029  
 Jain RK, 2013, ENER G BUILDINGS, V64, P408, DOI 10.1016/j.enbuild.2013.05.011  
 Jain RK, 2012, ENER G BUILDINGS, V48, P8, DOI 10.1016/j.enbuild.2011.12.033  
 McKerracher C, 2013, ENER G EFFIC, V6, P387, DOI 10.1007/s12053-012-9169-3  
 Murtagh N, 2013, ENER G POLICY, V62, P717, DOI 10.1016/j.enpol.2013.07.090  
 Pereira L., P 4 ACM SIGCHI S EN, P221  
 Peschiera G, 2012, ENER G BUILDINGS, V49, P584, DOI 10.1016/j.enbuild.2012.03.011  
 Peschiera G, 2010, ENER G BUILDINGS, V42, P1329, DOI 10.1016/j.enbuild.2010.03.001  
 Pierce J., P 8 AM C DES INT SYS, P244  
 Quintal F, 2013, LECT NOTES COMPUT SC, V8117, P453  
 Schultz PW, 2007, PSYCHOL SCI, V18, P429, DOI 10.1111/j.1467-9280.2007.01917.x  
 Schwartz T, 2014, INTERACTING COMPUTER  
 Spagnolli A, 2011, COMPUTER, V44, P38, DOI 10.1109/MC.2011.125  
 US EIA (US Energy Information Administration), 2014, ANN EN OUTL 2014 EAR  
 U.S.EPA The, 2012, INS STOR GUID IND AI  
 USDOE, 2011, BUILD EN DAT BOOK  
 USGBC U. G. B. C, 2014, LEED EX BUILD OP MAI  
 USGBC, 2014, LEED V4 BUILD DES CO  
 USGBC U. G. B. C, 2014, LEED HOM RAT SYST  
 Vine D., 2013, OPEN J ENERGY EFFICI, V2, P7, DOI DOI 10.4236/OJEE.2013.21002  
 Yun Ray, 2013, Persuasive Technology. 8th International Conference, PERSUASIVE 2013. Proceedings, P246, DOI 10.1007/978-3-642-37157-8\_29

NR 35

TC 0

Z9 0

U1 0

U2 1

PU AMER SOC CIVIL ENGINEERS

PI NEW YORK

PA UNITED ENGINEERING CENTER, 345 E 47TH ST, NEW YORK, NY 10017-2398 USA

BN 978-0-7844-7982-7

PY 2016

BP 1192

EP 1201

PG 10

WC Construction & Building Technology; Education, Scientific Disciplines;

Engineering, Industrial; Engineering, Civil

SC Construction & Building Technology; Education & Educational Research;

Engineering

GA BG4ZU

UT WOS:000389279902019

DA 2018-05-03

ER

PT B

AU Kosonen, H

Kim, A

AF Kosonen, Heta

Kim, Amy

BE Perdomo-Rivera, JL

Gonzalez-Quevedo, A

Lopez DelPuerto, C

Maldonado-Fortunet, F

Molina-Bas, OI

TI Quantifying Plug Load Energy Use in a LEED Gold Building-Lessons Learned  
 in the Installation Phase

SO CONSTRUCTION RESEARCH CONGRESS 2016: OLD AND NEW CONSTRUCTION  
 TECHNOLOGIES CONVERGE IN HISTORIC SAN JUAN



LA English

DT Proceedings Paper

CT Construction Research Congress

CY MAY 31-JUN 02, 2016

CL Univ Puerto Rico Mayaguez, Dept Civil Engn & Surveying, Construct Engn & M, San Juan, PR

SP Amer Soc Civil Engineers, Construct Inst, Construct Res Council

HO Univ Puerto Rico Mayaguez, Dept Civil Engn & Surveying, Construct Engn & M

ID ECO-FEEDBACK; REAL-TIME; SYSTEM; BEHAVIOR; CONSUMPTION

AB Commercial buildings account for 18% of the total annual energy use in the United States, which makes energy conservation efforts in office environments crucial to meeting future energy-reduction goals. As existing building stock renews and future buildings become "smarter," occupant-driven loads such as plug loads become more important in regulating energy use. Previous studies have focused on adopting sensors and informatics to benchmark and reduce plug load usage and modeled the impacts of various energy interventions on occupant loads by using standard occupant schedules over relatively short periods of time. However, wireless network disruptions and manual plug load data management for technology driven interventions, variability of individual occupant schedules, and lack of occupant engagement have all been identified as challenges to both accurately quantifying and further reducing the energy use on campus. In this paper, we discuss the aforementioned challenges in the light of our experiences in installing plug load management systems to 86 work desks in a high-performance office building on the University of Washington campus. The installation process is discussed both from occupants' and research team's point of view. As a conclusion, we propose a set of recommendations for the technical realization of future energy intervention studies.

C1 [Kosonen, Heta; Kim, Amy] Univ Washington, Dept Civil & Environm Engn, POB 352700, Seattle, WA 98198 USA.

RP Kosonen, H (reprint author), Univ Washington, Dept Civil & Environm Engn, POB 352700, Seattle, WA 98198 USA.

EM hetak@uw.edu; amyakim@uw.edu

CR Black E, 2014, U WASHINGTON RESIDEN

Carrico AR, 2011, J ENVIRON PSYCHOL, V31, P1, DOI 10.1016/j.jenvp.2010.11.004

Chen JY, 2011, WINT SIMUL C PROC, P883, DOI 10.1109/WSC.2011.6147814

Chen VL, 2014, ENERG BUILDINGS, V70, P455, DOI 10.1016/j.enbuild.2013.11.069

Coleman MJ, 2013, BUILD RES INF, V41, P637, DOI 10.1080/09613218.2013.808958

Dickson W., 1935, IND WELFARE PERSONNE, P15

Dixon GN, 2015, ENERGY RES SOC SCI, V6, P121, DOI 10.1016/j.erss.2015.01.004

EIA, 2015, US EN DEM SLOWS EX I

EIA, 2003, EN INF ADM EIA COMM

Gulbinas R, 2014, APPL ENERG, V136, P1076, DOI 10.1016/j.apenergy.2014.07.034

Gulbinas R, 2014, ENERG BUILDINGS, V84, P493, DOI 10.1016/j.enbuild.2014.08.017

Hargreaves T, 2010, ENERG POLICY, V38, P6111, DOI 10.1016/j.enpol.2010.05.068

Hasan S., 2013, LNCS, V7822, P75

Kosonen H. K., 2015, P 5 INT 11 CONSTR SP

Metzger I., 2011, CONTRACT, V303, P275

Murtagh N, 2013, ENERG POLICY, V62, P717, DOI 10.1016/j.enpol.2013.07.090

NREL, 2013, ASS RED PLUG PROC LO

Orland B, 2014, ENERG BUILDINGS, V74, P43, DOI 10.1016/j.enbuild.2014.01.036

Quintal F, 2013, LECT NOTES COMPUT SC, V8120, P133

Quintal F, 2013, LECT NOTES COMPUT SC, V8117, P453

Snow S., 2015, PERS UBIQUIT COMPUT, P1

Ueno T, 2006, APPL ENERG, V83, P166, DOI 10.1016/j.apenergy.2005.02.002

U. S. Energy Information Administration (EIA), 2014, DOEIEA0383

Yun R, 2014, LECT NOTES COMPUT SC, V8519, P616, DOI 10.1007/978-3-319-07635-5\_59

NR 24

TC 0

Z9 0

U1 0

U2 0

PU AMER SOC CIVIL ENGINEERS

PI NEW YORK  
 PA UNITED ENGINEERING CENTER, 345 E 47TH ST, NEW YORK, NY 10017-2398 USA  
 BN 978-0-7844-7982-7  
 PY 2016  
 BP 1234  
 EP 1243  
 PG 10  
 WC Construction & Building Technology; Education, Scientific Disciplines;  
 Engineering, Industrial; Engineering, Civil  
 SC Construction & Building Technology; Education & Educational Research;  
 Engineering  
 GA BG4ZU  
 UT WOS:000389279902023  
 DA 2018-05-03  
 ER

PT B  
 AU Nazer, M  
 AF Nazer, M.  
 BE Uslu, F  
 TI HOUSEHOLD ENERGY CONSUMPTION ANALYSIS IN INDONESIA 2008-2011  
 SO SOCIOINT16: 3RD INTERNATIONAL CONFERENCE ON SOCIAL SCIENCES AND  
 HUMANITIES

LA English  
 DT Proceedings Paper  
 CT 3rd International Conference on Social Sciences and Humanities  
 (SOCIOINT)

CY MAY 23-25, 2016  
 CL Istanbul, TURKEY

DE energy consumption; energy ladder; household energy

ID REQUIREMENTS; LADDER; TECHNOLOGY; TRANSITION; ZIMBABWE; CHOICES; INDIA

AB The goal of the study is to analyze the pattern and the change of household energy consumption and determinant factors in Indonesia in 2008-2011 by using National Economic Survey (SUSENAS) data of household budget survey. The concept of energy ladder and fuel stacking (multi fuel) are used to make a model of household energy consumption. The result of study shows that there was an increase in energy consumption, both for modern and traditional energy in the period of 2008-2011. Income elasticity of energy consumption is positive, meaning that there was an increase in consumption of modern energy together with traditional energy in line with the income growth. Household income is the main determinant factor of energy consumption along with others non-economic factors.

C1 [Nazer, M.] Andalas Univ Padang, Fac Econ, Padang, Indonesia.

RP Nazer, M (reprint author), Andalas Univ Padang, Fac Econ, Padang, Indonesia.

EM nazerm.km@gmail.com

CR Adu J, 2013, WORKING PAPER SERIES, V2013

Alam M, 1998, ENER POLICY, V26, P885, DOI 10.1016/S0301-4215(98)00008-1

Ashby R, 2011, STUDY RELATIONSHIPS

ASTAE (Program Energi Alternatif dan Berkelanjutan di Asia), 2013, IND MEN AKS UN MEM B

Atanassov B., 2010, THESIS

Barnes D., 2004, URBAN HOUSEHOLD ENER

Berhanu S, 1999, THESIS

Bhattacharjee S, 2011, P ASME 2011 5 INT C

CAGLAYAN E, 2012, AM INT J CONT RES, V2, P30

Campbell BM, 2003, ENER POLICY, V31, P553, DOI 10.1016/S0301-4215(02)00098-8

Cohen C, 2005, ENER POLICY, V33, P555, DOI 10.1016/j.enpol.2003.08.021

Masera dkk, 2000, WORLD DEV, V28, P2083

Dwiprabowo H, 2010, JURNAL ANALISIS KEBI, V7

ELKAN W, 1988, WORLD DEV, V16, P527, DOI 10.1016/0305-750X(88)90202-1

Ellen L, 1985, ENERGY EC, V7

ESMAP, 2003, HOUS EN US DEV COUNT

Estiri H, 2013, DIFFERENT REGIONS DI  
 Farsi M, 2006, FUEL CHOICES URBAN I  
 Foyosal M.A., 2012, INDIAN J ENERGY, V1, P72  
 Freund C, 1995, RAISING HOUSEHOLD EN  
 Gamtessa Samuel Faye, 2003, INT C AFR DEV ARCH  
 Gebreegziabher Z, 2012, ENERG ECON, V34, P410, DOI 10.1016/j.eneco.2011.07.017  
 Hanna R, 2015, AM ECON REV, V105, P242, DOI 10.1257/aer.p20151097  
 Heltberg R, 2003, FACTORS DETERMINING  
 HOSIER RH, 1987, RESOUR ENERG, V9, P347, DOI 10.1016/0165-0572(87)90003-X  
 IPART, 2011, DET RES EN WAT CONS  
 Islas Ignacio Cesar Cruz, 2013, J ENERGY DEV, V38  
 Jiang L., 2004, INT J GLOBAL ENERGY, V21, P2, DOI DOI 10.1504/IJGEI.2004.004691  
 Lenzen M, 2004, ECOL ECON, V49, P375, DOI 10.1016/j.ecolecon.2004.01.019  
 Maconachie R, 2009, LAND USE POLICY, V26, P1090, DOI 10.1016/j.landusepol.2009.01.008  
 Martiskainen M, 2011, ENERG EFFIC, V4, P209, DOI 10.1007/s12053-010-9094-2  
 Meier H, 2010, THESIS  
 ZMeier H, 2008, 1439 KIEL I WORLD EC  
 Miah MD, 2010, ENERG POLICY, V38, P997, DOI 10.1016/j.enpol.2009.10.051  
 Mirza B., 2011, J SUSTAINABLE DEV, V6, P133  
 Nababan Tonggam Sihol, 2008, THESIS  
 Nugroho SB, 2010, 16 ANN INT SUST DEV  
 Pachauri S, 2002, ENERG POLICY, V30, P511, DOI 10.1016/S0301-4215(01)00119-7  
 Poyer DA, 1997, ENERG ECON, V19, P445, DOI 10.1016/S0140-9883(97)01024-4  
 Ragayah HMZ, 2005, ASIAN PASIFIK EC LIT, V19  
 Weerahewa J, 2007, SRI LANKAN J AGR EC, V9, P55  
 Rao B, 1988, ASIAN-PAC ECON LIT, V2, P26  
 Reddy B.S., 2004, P 4 BIENN INT WORKSH, P469  
 Sadorsky P, 2012, ENERG POLICY, V48, P130, DOI 10.1016/j.enpol.2012.04.064  
 Shi W, 2011, THESIS FACULTY AUBUR  
 Shittu Idowu, 2004, AGREKON, V43, P38  
 Sirichotpundit P., 2013, ENV NATURAL RESOURCE, V11, P31  
 Sovacool BK, 2011, ENERG POLICY, V39, P1659, DOI 10.1016/j.enpol.2010.12.041  
 Steemers K, 2009, BUILDING RES INFORM, V37  
 Swan LG, 2009, RENEW SUST ENERG REV, V13, P1819, DOI 10.1016/j.rser.2008.09.033  
 Tampubolon Agustinus P., 2008, JURNAL ANALISIS KEBI, V5, P29  
 van der Kroon B, 2013, RENEW SUST ENERG REV, V20, P504, DOI 10.1016/j.rser.2012.11.045  
 Hiemstra-van der Horst G, 2008, ENERG POLICY, V36, P3333  
 Walker W, 1985, ENERGY POLICY OCT

NR 54

TC 0

Z9 0

U1 0

U2 2

PU INT ORGANIZATION CENTER ACAD RESEARCH

PI ISTANBUL

PA YUNUS EMRE CAD AKASYA SK NO 22, UGUR MUMCU, ISTANBUL, KARTAL 00000,  
TURKEY

BN 978-605-64453-7-8

PY 2016

BP 50

EP 61

PG 12

WC Humanities, Multidisciplinary; Social Sciences, Interdisciplinary

SC Arts &amp; Humanities - Other Topics; Social Sciences - Other Topics

GA BH4BB

UT WOS:000400168100011

DA 2018-05-03

ER

PT S

AU Rahman, KA

Leman, AM

Yusof, MZM

Salleh, MMN

AF Rahman, K. A.

Leman, A. M.

Yusof, M. Z. M.

Salleh, M. M. N.

BE Sharif, S

Abdullah, MMAB

Rahim, SZA

Ghazali, MF

Saad, NM

Ramli, MM

Murad, SAZ

Isa, SSA

TI Consumer Awareness in Energy Efficiency for Residential Houses in

Peninsular Malaysia

SO 2ND INTERNATIONAL CONFERENCE ON GREEN DESIGN AND MANUFACTURE 2016

(ICONGDM 2016)

SE MATEC Web of Conferences

LA English

DT Proceedings Paper

CT 2nd International Conference on Green Design and Manufacture (IConGDM)

CY MAY 01-02, 2016

CL Phuket, THAILAND

ID BEHAVIOR

AB Most energy efficiency (EE) measures implemented (or yet to be implemented) in Malaysia involve technological interventions, but it will rely on consumer behaviour including their awareness in energy consumption. This paper highlight the energy-saving awareness among consumers for residential houses which involves two main components: i) knowledge and ii) practice. The method for this study is using the questionnaires of 408 respondents from four zones in Peninsular Malaysia. Pearson Correlation analysis technique was used to examine the relationship of several variables with electricity saving awareness. The results of the analysis found that the both components, knowledge and practice have a significant relationship with consumer awareness. It shows that both components are very important to ensure the awareness of EE will be implemented by the consumer.

C1 [Rahman, K. A.; Yusof, M. Z. M.] Univ Tun Hussein Onn Malaysia, Fac Mech & Mfg Engr, Batu Pahat 86400, Johor, Malaysia.

[Leman, A. M.] Univ Tun Hussein Onn Malaysia, Fac Engr Technol, Batu Pahat 86400, Johor, Malaysia.

[Salleh, M. M. N.] Univ Tun Hussein Onn Malaysia, Fac Comp Sci & Informat Technol, Batu Pahat 86400, Johor, Malaysia.

RP Rahman, KA (reprint author), Univ Tun Hussein Onn Malaysia, Fac Mech & Mfg Engr, Batu Pahat 86400, Johor, Malaysia.

EM khairunnisa7482@gmail.com

CR Cohen J, 1988, STAT POWER ANAL BEHA

Energy Commission, 2013, PEN MAL EL SUPPL IND

Field A., 2009, DISCOVERING STAT USI

Fowler F. J., 2014, SURVEY RES METHODS

Fragidis G., 2015, CONSUMER AWARENESS E

Hussain T. P. R. Syed, 2013, PERKEM P, V2

Hussaini IU, 2014, INT J ENERGY SECT MA, V8, P230, DOI 10.1108/IJESM-10-2013-0005

Kemp-Hesterman A, 2014, J FACIL MANAG, V12, P4, DOI 10.1108/JFM-02-2013-0006

Abdul Majid N. H., 2011, 3 INT C APPL EN

Majid NHA, 2015, PROCD SOC BEHV, V170, P527, DOI 10.1016/j.sbspro.2015.01.054

MATELL MS, 1971, EDUC PSYCHOL MEAS, V31, P657, DOI 10.1177/001316447103100307

Mekhilef S., 2012, RENEWABLE SUSTAINABL

Pallant J., 2007, SPSS SURVIVAL MANUAL  
 Rahman KA, 2015, CHEM ENGINEER TRANS, V45, P1663, DOI 10.3303/CET1545278  
 Robinson P., 2011, J EXT, V49  
 Tenaga Nasional Berhad, 2014, EL TAR  
 Wulfinghoff D., 2003, BUILD OPERATE SUPER

NR 17

TC 0

Z9 0

U1 1

U2 1

PU E D P SCIENCES

PI CEDEX A

PA 17 AVE DU HOGGAR PARC D ACTIVITES COUTABOEUF BP 112, F-91944 CEDEX A,  
 FRANCE

SN 2261-236X

J9 MATEC WEB CONF

PY 2016

VL 78

AR UNSP 01010

DI 10.1051/mateconf/20167801010

PG 10

WC Engineering, Manufacturing; Engineering, Mechanical; Materials Science,  
 Multidisciplinary

SC Engineering; Materials Science

GA BG1GD

UT WOS:000386729000010

OA gold

DA 2018-05-03

ER

PT S

AU Soimosan, TM

Felseghi, RA

AF Soimosan, Teodora-Melania

Felseghi, Raluca-Andreea

GP SGEM

TI EFFICIENT SOLAR TECHNIQUE FOR BUILDINGS CONNECTED TO THE DISTRICT  
 HEATING SYSTEM. INDICATORS OF PERFORMANCE

SO ENERGY AND CLEAN TECHNOLOGIES CONFERENCE PROCEEDINGS, SGEM 2016, VOL III

SE International Multidisciplinary Scientific GeoConference-SGEM

LA English

DT Proceedings Paper

CT 16th International Multidisciplinary Scientific Geoconference (SGEM  
 2016)

CY JUN 30-JUL 06, 2016

CL Albena, BULGARIA

SP Bulgarian Acad Sci, Acad Sci Czech Republ, Latvian Acad Sci, Polish Acad Sci, Russian Acad Sci, Serbian  
 Acad Sci & Arts, Slovak Acad Sci, Natl Acad Sci Ukraine, Inst Water Problem & Hydropower NAS KR,  
 Natl Acad Sci Armenia, Sci Council Japan, World Acad Sci, European Acad Sci Arts & Lett, Acad Sci  
 Moldova, Montenegrin Acad Sci & Arts, Croatian Acad Sci & Arts, Georgian Natl Acad Sci, Acad Fine Arts  
 & Design Bratislava, Turkish Acad Sci, Bulgarian Ind Assoc, Bulgarian Minist Environm & Water

DE solar-thermal; collector field; energy efficiency; district heating  
 system; performance indicator

AB The following desiderata in the urban energy domain are accomplished as a result of integrating the  
 technologies of conversion and harness of the solar energy into the classic heating systems: saving  
 important quantities of fossil fuels, reducing associated CO<sub>2</sub> emissions, reducing the concentration of  
 pollutants in urban areas, increasing the energy efficiency of the buildings, increasing the energy  
 autonomy at the level of the district heating system. Harnessing the solar-thermal energy in crowded

urban areas for heating spaces and preparing domestic hot water in decentralized technical systems of producing heat is, most of the times, hard to implement given the restrictive conditions resulted from the local urban regulations, the limited available space for mounting the collectors fields and the operating regimes of the existing district heating systems. In this regard, the purposes of this paper are: identifying and analyzing the specific performance indicators applicable to urban consumers (buildings) equipped with decentralized solar-thermal systems which quantifies the impact of integrating solar thermal energy in the classic heating systems and the hybrid systems' efficiency thus obtained. The following concepts were approached simultaneously and synergistic: the energy efficiency of the buildings and the harnessing efficiency of the solar-thermal energy in the buildings connected to the district heating system. The criteria for a global evaluation of the performances achieved by the thermal energy Systems in accordance with the particularities of the working hypotheses and objectives pursued were established. The case-study Was carried out for an urban thermal area characterized by high thermal energy density in two hypotheses of energy efficiency of the buildings, the existing ones and the thermo-energetically optimized respectively. The computational modeling and setting of the operational frames of heating systems' simulations for the suggested working scenarios was achieved. The simulations were carried out during a calendar year.

C1 [Soimosan, Teodora-Melania; Felseghi, Raluca-Andreea] Tech Univ Cluj Napoca, Cluj Napoca, Romania.  
 RP Soimosan, TM (reprint author), Tech Univ Cluj Napoca, Cluj Napoca, Romania.

CR Guadalfajara M., 2013, SHC 2013 INT C SOL H  
 Duffle John A, 2013, SOLAR ENG THERMAL PR  
 [Anonymous], 2015, SURFACE METEOROLOGY  
 Soimosan T. M., 2015, THESIS  
 Srrensen P.A., 2012, HUTHER HEIKO SOLAR D  
 [Anonymous], 2016, POLYSUN DESIGNER SOF  
 [Anonymous], 2006, STANDARD REGARDING T  
 [Anonymous], 2015, 190711997 SR ROM I S  
 [Anonymous], 48391997 SR ROM I ST

NR 9

TC 0

Z9 0

U1 0

U2 0

PU STEF92 TECHNOLOGY LTD

PI SOFIA

PA 1 ANDREY LYAPCHEV BLVD, SOFIA, 1797, BULGARIA

SN 1314-2704

BN 978-619-7105-82-7

J9 INT MULTI SCI GEOCO

PY 2016

BP 251

EP 258

PG 8

WC GREEN & SUSTAINABLE SCIENCE & TECHNOLOGY; Energy & Fuels; Engineering,

Environmental; Meteorology & Atmospheric Sciences

SC Science & Technology - Other Topics; Energy & Fuels; Engineering;

Meteorology & Atmospheric Sciences

GA BG7IP

UT WOS:000391348900033

DA 2018-05-03

ER

PT B

AU Sonmez, D

Dincer, K

AF Sonmez, Deniz

Dincer, Kivanc

GP IEEE

BE Camurcu, AY

Cetin, A

TI A Review of Modern Residential Thermostats for Home Automation to  
Provide Energy Efficiency

SO 2016 4TH INTERNATIONAL ISTANBUL SMART GRID CONGRESS AND FAIR (ICSG)

LA English

DT Proceedings Paper

CT 4th International Istanbul Smart Grid Congress and Fair (ICSG)

CY APR 20-21, 2016

CL Istanbul, TURKEY

SP Republ Turkey, Minist EU Affairs, Turkiye Cumhuriyeti Kultur Turizm Bakanligi, KOSGEB, TEDAS, TEIAS, Istanbul Buyuksehir Belediyesi, Turkish Electro Technol, Energy Business Council, Foreign Econ Relat Board, Istanbul Kanalizasyon Idaresi, BOTAS, IGDAS Gokyuzuyle Arkadas, Istanbul Ticaret Odasi, Istanbul Sanayi Odasi, UHE, UFI, Elder, GAZBIR, TENVA, Turk Sanayici Isadamlari VAKFI, Organize Sanayi Bolgeleri Dernegi, Teknoloji Ar Ge Bilim Inouasyon Dernegi, TURKCELL, Vodafone, LUNA, STATUEAZ, SABAH, HITACHI, KOHLER, ORACLE, aselsan, ERICSSON, NETAS, SIEMENS, Microsoft, best, HHB EXPO, Republ Turkey, Minist Sci Ind & Technol, Republ Turkey, Minist Environm & Urbanisat, Republ Turkey, Minist Energy & Nat Resources, EPDK, Republ Turkey, Istanbul Metropolitan Municipal, Ugetam, IEEE SMARTGRID, IEEE Power & Energy Soc

DE Ambient Intelligence; Energy Management; Home Automation; Smart Homes;  
Thermostats

AB This paper focuses on how recently announced modern programmable and smart residential thermostats for smart homes can contribute to better energy usage in households. It explores people's motivation for using these technologies, how they actually use them and how much energy they can save based on the producer's experimental measurements.

C1 [Sonmez, Deniz; Dincer, Kivanc] Hacettepe Univ, Dept Comp Engn, Ankara, Turkey.

RP Sonmez, D (reprint author), Hacettepe Univ, Dept Comp Engn, Ankara, Turkey.

EM denizsonmez09@gmail.com; kivanc.dincer@hacettepe.edu.tr

CR Archacki R., 2003, COMMUNICATION

Energy Star, PROGR THERM VID PODC

Icontrol Networks, 2015 STAT SMART HOM

McCoy Gilbert A., 2012, SMART RESIDENTIAL TH

Meier Alan, PEOPLE ACTUALLY USE

Nest, 2015, EN SAV NEST LEARN TH

Peffer Therese, PEOPLE USE THERMOSTA

NR 7

TC 0

Z9 0

U1 0

U2 2

PU IEEE

PI NEW YORK

PA 345 E 47TH ST, NEW YORK, NY 10017 USA

BN 978-1-5090-0866-7

PY 2016

BP 104

EP 107

PG 4

WC Computer Science, Artificial Intelligence; Engineering, Electrical &  
Electronic

SC Computer Science; Engineering

GA BG5QH

UT WOS:000389660400020

DA 2018-05-03

ER

PT S

AU Szekeres, A

Jeswiet, J

AF Szekeres, Alex

Jeswiet, Jack  
 BE Seliger, G  
 Kruger, J  
 TI Impact of Technological Advancement on Adoption and Use of Residential  
 Heat Pumps

SO 23RD CIRP CONFERENCE ON LIFE CYCLE ENGINEERING

SE Procedia CIRP

LA English

DT Proceedings Paper

CT 23rd CIRP Conference on Life Cycle Engineering

CY MAY 22-24, 2016

CL Berlin, GERMANY

SP CIRP

DE Energy; Heating; System Dynamics

AB Heat pump performance is always improving. Lower minimum operating temperatures and better performance curves are increasing both the number of hours of useful service and effectiveness while in use. We estimate the rate of technological development for residential air source heat pumps and their consequent rate of adoption using a system dynamics model. From the perspective of the use stage in life cycle assessment, energy savings and greenhouse gas emissions reductions are estimated. A substantial reduction in overall energy consumption is predicted, while greenhouse gas emissions are only reduced where electricity is generated with little or no fossil fuels. (C) 2016 The Authors. Published by Elsevier B.V.

C1 [Szekeres, Alex; Jeswiet, Jack] Queens Univ, Kingston, ON K7L 3N6, Canada.

RP Szekeres, A (reprint author), Queens Univ, Kingston, ON K7L 3N6, Canada.

EM 7ajs@queensu.ca

CR ASHRAE, 2013, 2013 ASHRAE HDB FUND

ASHRAE, 2012, 2012 ASHRAE HDB HEAT

Chiarelli B., 2013, ACHIEVING BALANCE ON

[Anonymous], 1992, EN MAN SER HEAT VENT

Environment Canada, 2012, NAT INV REP 1990 1 3

Fairey P., 2004, ASHRAE T, V110, P178

IPCC, 2013, CLIM CHANG 2013 PHYS

NRCan, NAT RES CAN EN EFF P

NRCan, NAT EN US DAT

NRCan, 2015, AV RET PRIC FURN OIL

NRCan, 2014, EN US DAT HDB

Sproule, 2015, NAT GAS OIL PRIC FOR

Statistics Canada, TABL 127 008 SUPPL D

Statistics Canada, 2015, TABL 129 0003 SAL NA

Sterman JD., 2000, BUSINESS DYNAMICS SY

Wright T, 1936, J AERONAUT SCI, V3, P122, DOI DOI 10.2514/8.155

NR 16

TC 0

Z9 0

U1 0

U2 0

PU ELSEVIER SCIENCE BV

PI AMSTERDAM

PA SARA BURGERHARTSTRAAT 25, PO BOX 211, 1000 AE AMSTERDAM, NETHERLANDS

SN 2212-8271

J9 PROC CIRP

PY 2016

VL 48

BP 394

EP 400

DI 10.1016/j.procir.2016.03.160

PG 7

WC Engineering, Industrial; Operations Research & Management Science

SC Engineering; Operations Research & Management Science



GA BF9AT  
 UT WOS:000385400300067  
 OA gold  
 DA 2018-05-03  
 ER

PT S  
 AU Wang, D  
 Yu, W  
 Zhao, X  
 Dai, W  
 Ruan, Y

AF Wang, D.  
 Yu, W.  
 Zhao, X.  
 Dai, W.  
 Ruan, Y.

BE Kyriakopoulos, GL

TI The influence of thermal insulation position in building exterior walls  
 on indoor thermal comfort and energy consumption of residential  
 buildings in Chongqing

SO 2016 INTERNATIONAL CONFERENCE ON NEW ENERGY AND FUTURE ENERGY SYSTEM  
 (NEFES 2016)

SE IOP Conference Series-Earth and Environmental Science

LA English

DT Proceedings Paper

CT International Conference on New Energy and Future Energy System (NEFES)

CY AUG 19-22, 2016

CL Beijing, PEOPLES R CHINA

ID LOADS

AB This paper focused on the influence of using position of thermal insulation materials in exterior walls on the indoor thermal comfort and building energy consumption of residential building in Chongqing. In this study, four (4) typical residential building models in Chongqing were established, which have different usage of thermal insulation layer position in exterior walls. Indoor thermal comfort hours, cooling and heating energy consumption of each model were obtained by using a simulation tool, Energyplus. Based on the simulation data, the influence of thermal insulation position on indoor thermal comfort and building energy consumption in each season was analyzed. The results showed that building with internal insulation had the highest indoor thermal comfort hours and least cooling and heating energy consumption in summer and winter. In transitional season, the highest indoor thermal comfort hours are obtained when thermal insulation is located on the exterior side.

C1 [Wang, D.; Yu, W.; Zhao, X.; Dai, W.; Ruan, Y.] Chongqing Univ, Fac Urban Construct & Environm Engrn, Chongqing 400045, Peoples R China.

RP Wang, D (reprint author), Chongqing Univ, Fac Urban Construct & Environm Engrn, Chongqing 400045, Peoples R China.

EM wang18239978874@163.com

CR Al-Homoud MS, 2005, BUILD ENVIRON, V40, P353, DOI 10.1016/j.buildenv.2004.05.013

Bojic M, 2001, ENERG BUILDINGS, V33, P569, DOI 10.1016/S0378-7788(00)00125-0

Building Energy Research Center, 2015, CHIN BUILD EN EFF AN

Construction technology development center of Chongqing, 2005, BUILD EN SAV DES STA

Daouas N, 2011, APPL ENERG, V88, P156, DOI 10.1016/j.apenergy.2010.07.030

General Administration of Quality Supervision, 2002, 188832002 GBT GEN AD

Kossecka E, 2002, ENERG BUILDINGS, V34, P321, DOI 10.1016/S0378-7788(01)00121-9

Meteorological information center of China Meteorological Administration, 2005, MET DAT THERM ENV AN

Ministry of Housing and Urban-Rural Development of the People's Republic of China, 2010, 1342010 JGJ

MIN HOUS

Nicol JF, 2002, ENERG BUILDINGS, V34, P563, DOI 10.1016/S0378-7788(02)00006-3

Omaki K, 2003, APPL THERM ENG, V23, P473

Ozel M, 2007, BUILD ENVIRON, V42, P3051, DOI 10.1016/j.buildenv.2006.07.025  
Ruan F, 2015, APPL MECH MAT, V744-746, P2340  
Stadler M, 2006, ON SITE GENERATION S  
Tummu P, 2013, ENERG BUILDINGS, V61, P323, DOI 10.1016/j.enbuild.2013.02.035  
Urban and Rural Construction Committee of Chongqing, 2010, DBJ500712010 URB RUR  
Wang W, 2008, RES MIX DESIGN POLYM  
Yao RM, 2009, BUILD ENVIRON, V44, P2089, DOI 10.1016/j.buildenv.2009.02.014  
Yu W, 2011, BUILDING MULTIOBJECT  
Zhang Y, 2012, REPORT RES PROGR IND  
Zheng B, 2015, APPL ENERG, V156, P230, DOI 10.1016/j.apenergy.2015.07.018  
NR 21  
TC 0  
Z9 0  
U1 0  
U2 4  
PU IOP PUBLISHING LTD  
PI BRISTOL  
PA DIRAC HOUSE, TEMPLE BACK, BRISTOL BS1 6BE, ENGLAND  
SN 1755-1307  
J9 IOP C SER EARTH ENV  
JI IOP Conf. Ser. Earth Envir. Sci.  
PY 2016  
VL 40  
AR UNSP 012081  
DI 10.1088/1755-1315/40/1/012081  
PG 13  
WC Energy & Fuels  
SC Energy & Fuels  
GA BG6QE  
UT WOS:000390786400081  
OA gold  
DA 2018-05-03  
ER  
  
PT B  
AU Yang, Y  
    Jia, QS  
    Guan, XH  
AF Yang, Yu  
    Jia, Qing-Shan  
    Guan, Xiaohong  
GP IEEE  
TI Improving the Prediction Accuracy of Building Energy Consumption using  
    Location of Occupant  
SO PROCEEDINGS 2016 IEEE INTERNATIONAL CONFERENCE ON INDUSTRIAL TECHNOLOGY  
    (ICIT)  
LA English  
DT Proceedings Paper  
CT IEEE International Conference on Industrial Technology (ICET)  
CY MAR 14-17, 2016  
CL Taipei, TAIWAN  
SP Inst Elect & Elect Engineers, IEEE Ind Elect Soc, Natl Taiwan Univ, Int Ctr Excellence Intelligent Robot &  
    Automat Res  
DE Smart building; energy consumption forecasting; localization of  
    occupant; platform  
ID ARTIFICIAL NEURAL-NETWORKS; LOAD PROFILE  
AB On the one hand, energy consumption forecasting in buildings is of great practical interest due to the  
    large amount of energy that is consumed in buildings and therefore the big energy saving potential.

Improving the prediction accuracy has attracted more and more attentions in recent years but still remains an open question. On the other hand, recent advances in technology has provided various economically affordable ways to obtain the location of the occupant. In this work, we focus on how to improve the prediction accuracy of building energy consumption using location of occupant. Three major contributions have been made. First, we formulate the energy consumption prediction problems as Markov decision processes. Second, we develop a platform including a lab, an apartment, and one occupant. The location of the occupant as well as the energy consumption in the lab and the apartment are monitored in the platform. Third, we show that the prediction accuracies of the energy consumption of both the buildings and the occupant can be improved using the location of the occupant. We hope that this work sheds some light on improving the energy efficiency of buildings in the near future.

C1 [Yang, Yu; Jia, Qing-Shan; Guan, Xiaohong] Tsinghua Univ, Dept Automat, CFINS, TNLIST, Beijing, Peoples R China.

[Guan, Xiaohong] Xi An Jiao Tong Univ, MOEKLINNS Lab, Xian, Shaanxi Provinc, Peoples R China.

RP Yang, Y (reprint author), Tsinghua Univ, Dept Automat, CFINS, TNLIST, Beijing, Peoples R China.

EM yangyu13@mails.tsinghua.edu.cn; jiaqs@tsinghua.edu.cn;

xhguan@tsinghua.edu.cn

CR Benjamin Z. Y., 2011, ENERGY BUILDINGS, V43

Chen JY, 2012, ENER BUILDINGS, V47, P515, DOI 10.1016/j.enbuild.2011.12.026

Cho SH, 2004, ENER CONVERS MANAGE, V45, P2867, DOI 10.1016/j.enconman.2003.12.017

Ekici BB, 2009, ADV ENG SOFTW, V40, P356, DOI 10.1016/j.advengsoft.2008.05.003

Feng X. H., 2005, ENER BUILDINGS, V87, P348

Hu CL, 2015, CHIN CONTR CONF, P8243, DOI 10.1109/ChiCC.2015.7260948

Kimbara A, 1995, ASHRAE TRAN, V101, P198

H Li, 2007, TECHNOLOGY APPL NATU

Li Q, 2009, APPL ENER, V86, P2249, DOI 10.1016/j.apenergy.2008.11.035

PARK JH, 1991, IEEE T POWER SYST, V6, P450, DOI 10.1109/59.76686

Westphal FS, 2004, ENER BUILDINGS, V36, P847, DOI 10.1016/j.enbuild.2004.01.007

White JA, 1996, PROC IECEC, P1834, DOI 10.1109/IECEC.1996.553381

Yang J, 2005, ENER BUILDINGS, V37, P1250, DOI 10.1016/j.enbuild.2005.02.005

Yao RM, 2005, ENER BUILDINGS, V37, P663, DOI 10.1016/j.enbuild.2004.09.007

Zhang Y, 2014, INT CONF SYST SCI EN, P60, DOI 10.1109/ICSSE.2014.6887905

Zhao HX, 2012, RENEW SUST ENER REV, V16, P3586, DOI 10.1016/j.rser.2012.02.049

NR 16

TC 0

Z9 0

U1 0

U2 1

PU IEEE

PI NEW YORK

PA 345 E 47TH ST, NEW YORK, NY 10017 USA

BN 978-1-4673-8075-1

PY 2016

BP 1550

EP 1555

PG 6

WC Computer Science, Theory & Methods; Engineering, Electrical & Electronic

SC Computer Science; Engineering

GA BG0ML

UT WOS:000386327700241

DA 2018-05-03

ER

PT S

AU Zdany, P

Susinkas, S

Stasiskis, A

AF Zdany, P.

Susinkas, S.

Stasiskis, A.  
BE Koczy, L  
Susniene, D  
Zostautiene, D  
TI Impact of the entrance vestibule on energy demand of a building  
SO 11TH INTERNATIONAL CONFERENCE ON INTELLIGENT TECHNOLOGIES IN LOGISTICS  
AND MECHATRONICS SYSTEMS (ITELMS'2016)  
SE Intelligent Technologies in Logistics and Mechatronics Systems  
LA English  
DT Proceedings Paper  
CT 11th International Conference on Intelligent Technologies in Logistics  
and Mechatronics Systems (ITELMS)  
CY APR 28-29, 2016  
CL Panevezys, LITHUANIA  
DE entrance vestibule; atrium; simulation of energy demand; DesignBuider;  
EnergyPlius; calculated total energy consumption; dynamic methods of  
detailed simulation  
AB The article addresses the issues of energy efficiency of public buildings through application of dynamic  
simulation of the building energy demand. The main object of the Research is the influence of the entrance  
vestibule of the public building on the building's energy demand. By means of the computer programs  
Design Builder and EnergyPlius, the energetic simulation has been done in order to determine the energy  
demand. For the public building, two different simulations of the building premises' layout and changes of  
their use purposes have been done. We have presented the Research results and conclusions. (C) 2016 P.  
Zdanys, S. Susinskas, A. Stasiskis. Peer-review under responsibility of the Kaunas University of  
Technology, Panevezys Faculty of Technologies and Business  
C1 [Zdanys, P.; Susinskas, S.; Stasiskis, A.] Kaunas Univ Technol, Panevezys Fac Technol & Business, S  
Daukanto Str 12, LT-35212 Panevezys, Lithuania.  
RP Zdanys, P (reprint author), Kaunas Univ Technol, Panevezys Fac Technol & Business, S Daukanto Str 12,  
LT-35212 Panevezys, Lithuania.  
EM ptvf@ktu.lt  
CR Motuziene V., 2010, THESIS, P29  
U. S. Department of Energy, 2015, ENG REF REF ENERGYPL  
NR 2  
TC 0  
Z9 0  
U1 0  
U2 0  
PU MEDIMOND S R L  
PI 40128 BOLOGNA  
PA VIA MASERATI 5, 40128 BOLOGNA, 00000, ITALY  
SN 2345-0088  
BN 978-88-7587-737-8  
J9 INTELL TECHNOL LOG  
PY 2016  
BP 195  
EP 204  
PG 10  
WC Engineering, Multidisciplinary; Engineering, Electrical & Electronic;  
Engineering, Mechanical  
SC Engineering  
GA BG7SI  
UT WOS:000391654200027  
DA 2018-05-03  
ER  
  
PT S  
AU Zhang, H  
AF Zhang, Hong

BE Zhu, J  
Yao, G  
TI Research on Micro Energy Collection for Building Energy Saving  
Prediction  
SO PROCEEDINGS OF THE 2016 4TH INTERNATIONAL CONFERENCE ON MACHINERY,  
MATERIALS AND COMPUTING TECHNOLOGY  
SE AER-Advances in Engineering Research  
LA English  
DT Proceedings Paper  
CT 4th International Conference on Machinery, Materials and Computing  
Technology (ICMMCT)  
CY JAN 23-24, 2016  
CL Hangzhou, PEOPLES R CHINA  
DE Energy Conservation; Building; Air Conditioning; Collection Of Micro  
Energy  
AB The diversity and complexity of large public buildings, our country's local climate, economy, life habits  
variation result in a lack of basic data to support energy-saving operation standard, energy saving  
technology for the reconstruction of the applicability and the lack of practical test, which leads to a  
phenomenon. Operating standards is still derived from the design standards and a small number of  
measured data, energy-saving technological transformation in a project or place successfully is  
popularized in the whole country, the engineering application and theory of scientific research confusion is  
not clear, management of government departments, public building owners is at a loss.  
C1 [Zhang, Hong] Shandong Inst Commerce & Technol, Jinan 250103, Peoples R China.  
RP Zhang, H (reprint author), Shandong Inst Commerce & Technol, Jinan 250103, Peoples R China.  
EM zhanghongsd78@163.com  
CR Bao G, 2014, 36 ANN INT C IEEE EN  
Hu J, 2012, J APPL MATH, V2012  
Jiang D, 2015, WIRELESS PERS COMMUN, P1, DOI [10.1007/s11277-015-2961-6, DOI 10.1007/S11277-015-  
2961-6]  
Song Xinchao, 2014, Journal of Networks, V9, P2758, DOI 10.4304/jnw.9.10.2758-2765  
NR 4  
TC 0  
Z9 0  
U1 0  
U2 1  
PU ATLANTIS PRESS  
PI PARIS  
PA 29 AVENUE LAVMIERE, PARIS, 75019, FRANCE  
SN 2352-5401  
BN 978-94-6252-165-0  
J9 AER ADV ENG RES  
PY 2016  
VL 60  
BP 1771  
EP 1774  
PG 4  
WC Automation & Control Systems; Computer Science, Theory & Methods;  
Engineering, Mechanical; Materials Science, Multidisciplinary  
SC Automation & Control Systems; Computer Science; Engineering; Materials  
Science  
GA BG2MS  
UT WOS:000387481800352  
DA 2018-05-03  
ER  
  
PT J  
AU Koumoutsos, K  
Kretsis, A

- Kokkinos, P  
 Varvarigos, EA  
 Nikolopoulos, V  
 Gkioxi, E  
 Zafeiropoulos, A  
 AF Koumoutsos, Kostas  
 Kretsis, Aristotelis  
 Kokkinos, Panagiotis  
 Varvarigos, Emmanouel A.  
 Nikolopoulos, Vassilis  
 Gkioxi, Eirini  
 Zafeiropoulos, Anastatios
- TI Gathering and processing energy consumption data from public educational buildings over IPv6
- SO ENERGY SUSTAINABILITY AND SOCIETY
- LA English
- DT Article
- DE Smart energy meters; Energy information system; Advance energy analytics; IPv6; School network
- ID MONITORS; TERM
- AB Background: Reducing energy consumption and CO2 emissions in order to address climate change requires behavioral changes by the citizens, who will have to adopt more environmentally friendly and energy-saving practices.  
 Methods: We present a system and corresponding practices for gathering energy consumption data from public school buildings over the Internet, processing them to identify hidden correlations and produce actionable advice and presenting the results in real-time to its occupants over the Web. We describe the metering infrastructure installed at schools for energy consumption monitoring and the related actions carried out in order to motivate local school communities towards an environmentally friendly behavior. The introduction of IPv6 was found to be a key enabling technology for setting up such a system in a simple, secure, and efficient way.  
 Results: The proposed system and processes are put under test in a pilot installation composed of about 50 IPv6-enabled schools of the Greek School Network (GSN). These are also combined with appropriate educational and social engagement tools. In this way, energy consumption, operating costs, and greenhouse effects can be reduced in the area of educational and public administration buildings in general. Thus, people become almost instantly aware of the energy and environmental implications of their actions, which motivates them towards behavioral changes and the adoption of environmentally friendly practices.  
 Conclusions: The pilot provides a good example of collaboration between the ICT sector, the smart building and automation vendors, and the public authorities.
- C1 [Koumoutsos, Kostas; Kretsis, Aristotelis; Kokkinos, Panagiotis; Varvarigos, Emmanouel A.] Univ Patras, Dept Comp Engr & Informat, Patras, Greece.  
 [Koumoutsos, Kostas; Kretsis, Aristotelis; Kokkinos, Panagiotis; Varvarigos, Emmanouel A.] Comp Technol Inst Diophantus, Patras, Greece.  
 [Nikolopoulos, Vassilis; Gkioxi, Eirini] Intelen Adv Engr Div, Nicosia, Cyprus.  
 [Zafeiropoulos, Anastatios] Greek Res & Technol Network, Athens, Greece.
- RP Kretsis, A (reprint author), Univ Patras, Dept Comp Engr & Informat, Patras, Greece.  
 EM akretsis@ceid.upatras.gr  
 OI Zafeiropoulos, Anastasios/0000-0003-0078-8697
- CR Al-Daraiseh A., 2013, INT J DISTRIB SENS N, V2013  
 Bogdanski G., 2012, LEVERAGING TECHNOLOG, P539, DOI 10.1007/978-3-642-29069-5\_91  
 Darby S, 2006, EFFECTIVENESS FEEDBA  
 Dascalaki EG, 2011, ENERGBUILDINGS, V43, P718, DOI 10.1016/j.enbuild.2010.11.017  
 Gill T, 2010, BUILD RES INF, V38, P5  
 Hargreaves T, 2013, ENERGPOLICY, V52, P126, DOI 10.1016/j.enpol.2012.03.027  
 Kalogeras D, 2005, COOKBOOK DEPLOYING I  
 Kermish-Allen R., 2015, J SUSTAINABILITY ED, V8  
 Popoviciu CP, 2006, DEPLOYING IPV6 NETWO  
 Schultz W, 2007, PSYCHOL SCI, V18, P429, DOI DOI 10.1111/J.1467-9280.2007.01917.X

Trejo-Perea M, 2013, PROC TECH, V7, P238, DOI 10.1016/j.protcy.2013.04.030  
 van Dam SS, 2010, BUILD RES INF, V38, P458, DOI 10.1080/09613218.2010.494832  
 Zhao L, 2013, ENERG BUILDINGS, V66, P41, DOI 10.1016/j.enbuild.2013.07.007  
 [Anonymous], 2015, ENERGY EFFICIENT BUI

NR 14

TC 0

Z9 0

U1 4

U2 11

PU SPRINGER HEIDELBERG

PI HEIDELBERG

PA TIERGARTENSTRASSE 17, D-69121 HEIDELBERG, GERMANY

SN 2192-0567

J9 ENERGY SUSTAIN SOC

JI Energy Sustain. Soc.

PD DEC

PY 2015

VL 5

IS 1

AR 24

DI 10.1186/s13705-015-0051-y

PG 12

WC GREEN & SUSTAINABLE SCIENCE & TECHNOLOGY; Energy & Fuels

SC Science & Technology - Other Topics; Energy & Fuels

GA CY6FK

UT WOS:000366503600024

OA gold

DA 2018-05-03

ER

PT J

AU Naranjo, YA

Kuchen, E

Rostol, CG

Frank, AA

AF Alamino Naranjo, Yesica

Kuchen, Ernesto

Gil Rostol, Celeste

Alonso Frank, Alcion

TI Operations monitoring and energy efficiency strategies in the Obras

Sanitarias Sociedad del Estado (State Sanitary Works Company) public

building, San Juan, Argentina

SO REVISTA HABITAT SUSTENTABLE

LA Spanish

DT Article

DE Rational use of energy; electric devices; energy; monitoring

AB In the last ten years, the increase in installed electricity capacity in consumption sectors has surpassed electricity generation capacity, thereby causing Argentina to become an energy-dependent country. One of the relief measures for the associated environmental, social and economic consequences involves reducing energy consumption in the buildings sector. People spend more than 30% of their time in work spaces, in climate-controlled indoor environments. The aim of this study is to find strategies to improve the energy efficiency of buildings without decreasing quality of life for users. To this end, a field study was carried out in the Obras Sanitarias Sociedad del Estado (OSSE) (State Sanitary Works Company) building, in the city of San Juan, Argentina, using an experimental approach that took into consideration functional and technological aspects of the building as well as its equipment. The results show high energy demand values for the heating and cooling system and the electric devices in offices. The implementation of minimum investment intervention strategies would enable a 42% reduction in energy consumption and the recovery of more than 70% of the total investment during the first year of operation.

C1 [Alamino Naranjo, Yesica; Kuchen, Ernesto; Gil Rostol, Celeste; Alonso Frank, Alcion] Univ Nacl San Juan, Inst Reg Planeamiento & Habitat, Fac Arquitectura Urbanismo & Diseno, San Juan, Argentina.  
RP Naranjo, YA (reprint author), Univ Nacl San Juan, Inst Reg Planeamiento & Habitat, Fac Arquitectura Urbanismo & Diseno, San Juan, Argentina.  
EM yesialamino@hotmail.com; ernestokuchen@fau. unsj. edu. ar;  
celeste\_252@hotmail.com; afrank@fau. unsj. edu. ar  
CR 2000Watt-Society, 1998, PROGR AH EN  
ALEMANIA, 2000, ERNEUERBARE ENERGIEN  
ALONSO-FRANK Alcion, 2012, REV AVERMA AVANCES E, V16, P65  
DE ENERGIA Programa GenRen SECRETARIA, 2009, PROGRAM GENREN ENARS  
Departamento de Informacion Economica y Social (DIES), CONS EL  
[Anonymous], 2007, V18599 DIN  
DEUTSCHES INSTITUT FUR NORMUNG (DIN), 1996, 4108 DIN  
DUTT Gautam S., 2006, ESC EN ARG 2006 2020  
Empresa de Servicio de Suministro de la Electricidad en San Juan (EPSE), GEN EN EL REC  
Energie Betriebsoptimierung EnBop, PROGR OPT FUNC EN ED  
Energie Optimeiertes Bauen EnOB., PROGR CONSTR EN OPT  
Ente Provincial Provincial Regulador de la Energia (EPRE), CONS EN AN  
INSTITUTO ARGENTINO DE NORMALIZACION Y CERTIFICACION (IRAM), 1996, 116031996 IRAM  
Kuchen E., 2012, REV HABITAT SUSTENTA, V2, P34  
Kuchen E., 2013, REV HABITAT SUSTENTA, V3, P55  
LUTZ Wolfgang, 2003, PROGRAMA AHORRO EFIC  
MINISTERIO DE CIENCIA Y TECNOLOGIA, 2012, US RAC EF EN URE  
PLESSER Stefan, 2008, P 5 INT C IMPR EN EF  
TORANZO Eugenia, 2012, REV AVERMA AVANCES E, V16, P157  
NR 19  
TC 0  
Z9 0  
U1 0  
U2 0  
PU UNIV BIO-BIO  
PI CONCEPCION  
PA WOOD ENGINEERING DEPT, AVENIDA COLLAO 1202, CASILLA 5-C, CONCEPCION,  
00000, CHILE  
SN 0719-0700  
J9 REV HABITAT SUSTENTA  
JI Rev. Habitat Sustentable  
PD JUN  
PY 2015  
VL 5  
IS 1  
BP 14  
EP 23  
PG 10  
WC Engineering, Environmental  
SC Engineering  
GA V36NW  
UT WOS:000215975900003  
OA gold  
DA 2018-05-03  
ER  
  
PT S  
AU Aileni, RM  
AF Aileni, Raluca Maria  
BE Vlada, M  
Albeanu, G  
Adascalitei, A



Popovici, M  
 TI Cloud hybrid service for monitoring building energy efficiency obtained  
 by using insulation structures  
 SO Proceedings of the 10th International Conference on Virtual Learning  
 SE Proceedings of the International Conference on Virtual learning  
 LA English  
 DT Proceedings Paper  
 CT 10th International Conference on Virtual Learning  
 CY OCT 31, 2015  
 CL Timisoara, ROMANIA  
 DE Cloud computing; M2M; monitoring; sensors; building  
 AB The paper present the model based on smart sensors network system for building efficiency monitoring  
 based on machine to machine (M2M) technologies. The system is based on temperature sensors, a  
 mainboard, a transceiver and a power source. The sensors are integrated in experimental model for  
 receiving and send wireless data. The data storage is made on cloud (PaaS) and the users may access data  
 by using a web based interface (SaaS). Cloud computing and grid computing are oriented in sharing  
 distributed resources in a network environment and this allow a large number of users to send and receive  
 information. The resources shared are systems like CPUs, storage, data, and memory. By using cloud  
 computing is possible to storage data received from sensors, analyze data and provide charts. Data from  
 cloud computing services (PaaS) can be used in IoT projects.  
 C1 [Aileni, Raluca Maria] Univ Politehn Bucuresti, Fac Elect Telecommun & Informat Technol, Iuliu Maniu St  
 1-3, Bucharest, Romania.  
 RP Aileni, RM (reprint author), Univ Politehn Bucuresti, Fac Elect Telecommun & Informat Technol, Iuliu  
 Maniu St 1-3, Bucharest, Romania.  
 EM raluca.maria.aileni@gmail.com  
 CR Aileni R. M., 2014, OPTIMIZATION THERMAL  
 Boswarthick D., 2012, M2M COMMUNICATIONS S  
 Doukas C., 2011, P HHIRD IEEE INT C C  
 Garber D., 2013, WINDOWS AZURE HYBRID  
 Jeffrey M. N., 2010, HDB CLOUD COMPUTING  
 NR 5  
 TC 0  
 Z9 0  
 U1 0  
 U2 0  
 PU BUCHAREST UNIVERSITY PRESS  
 PI BUCHAREST  
 PA SOS PANDURI NR 90-92, BUCHAREST, 050663, ROMANIA  
 SN 1844-8933  
 J9 PROC INT C VIRTUAL L  
 PY 2015  
 BP 342  
 EP 346  
 PG 5  
 WC Computer Science, Interdisciplinary Applications; Education &  
 Educational Research  
 SC Computer Science; Education & Educational Research  
 GA BF3TL  
 UT WOS:000380576300050  
 DA 2018-05-03  
 ER  
 PT B  
 AU Benner, J  
 Hafele, KH  
 Bonsma, P  
 Bourdeau, M  
 Soubra, S

- Sleiman, H  
Robert, S
- AF Benner, Joachim  
Haefele, Karl-Heinz  
Bonsma, Peter  
Bourdeau, Marc  
Soubra, Souheil  
Sleiman, Hassan  
Robert, Sylvain
- BE Mahdavi, A  
Martens, B  
Scherer, R
- TI Interoperable tools for designing energy-efficient buildings in healthcare districts
- SO EWORK AND EBUSINESS IN ARCHITECTURE, ENGINEERING AND CONSTRUCTION 2014
- LA English
- DT Proceedings Paper
- CT PROCEEDINGS OF THE 10TH EUROPEAN CONFERENCE ON PRODUCT AND PROCESS MODELLING (ECPM 2014)
- CY SEP 17-19, 2014
- CL Department of Building Physics and Building Ecology of the Vienna Universi, Vienna, AUSTRIA
- HO Department of Building Physics and Building Ecology of the Vienna Universi
- AB The EU funded collaborative research project STREAMER aims on Energy-efficient Buildings (EeB), focusing on mixed-use healthcare districts. Besides innovations in EeB technology, special emphasis is laid on improving methodologies and tools used in the design process of new or retrofitted hospital buildings. STREAMER follows a model-based, holistic approach by integrating design data on both building and district level. Advanced ICT methods like Semantic Web, Ontologies, Parametric Modelling or Knowledge Based Systems, will be reviewed, adapted, and improved to use them during the energy-efficient-buildings design process. The project not only aims on developing theoretical concepts, but also on practical case studies: based on already existing software, a number of interoperable software tools shall be developed and evaluated in four demonstration projects. The paper describes the system architecture and provides a functional spectrum of the design tools, focusing on interoperability issues.
- C1 [Benner, Joachim; Haefele, Karl-Heinz] Karlsruhe Inst Technol, Karlsruhe, Germany.  
[Bonsma, Peter] TNO Tech Sci, Delft, Netherlands.  
[Bourdeau, Marc; Soubra, Souheil] CSTB, Sophia Antipolis, France.  
[Sleiman, Hassan; Robert, Sylvain] CEA LIST, Digiteo Labs Saclay, Gif Sur Yvette, France.
- RP Benner, J (reprint author), Karlsruhe Inst Technol, Karlsruhe, Germany.
- CR Benner J., 2010, P INT C 3D GEOINF BE  
Benner J., 2013, P GEOINF 2013 U HEID  
Broring A., 2012, 12006 OGC  
CMO, 2014, CONC MOD ONT  
de Laat R., 2011, ADV 3D GEOINFORMATIO  
de La Beaujardiere J., 2006, 06042 OGC  
El-Mekawy M, 2012, ISPRS INT J GEO-INF, V1, P120, DOI 10.3390/ijgi1020120  
gbXML, 2014, GBXML GREEN BUILD XM  
Groger G., 2012, 12019 OGC  
IFC, 2013, 167392013 IFC ISO  
IFC, 2014, IFC COORD VIEW 2 0  
Pauwels P, 2011, AUTOMAT CONSTR, V20, P506, DOI 10.1016/j.autcon.2010.11.017  
PLM, 2014, PLM GLOSS  
Ramm F., 2010, OPENSTREEMAP  
Sebastian R, 2013, ISPRS ANN PHOTOGRAMM, VII-2, P255  
Vretanos P., 2010, 09025R1 OGC  
W3C, 2009, OWL 2 WEB ONT LANG  
W3C, 2014, W3C SEM WEB  
W3C, 2012, OWL 2 WEB ONT LANG D
- NR 19

TC 0

Z9 0

U1 0

U2 0

PU CRC PRESS-TAYLOR &amp; FRANCIS GROUP

PI BOCA RATON

PA 6000 BROKEN SOUND PARKWAY NW, STE 300, BOCA RATON, FL 33487-2742 USA

BN 978-1-315-73695-2; 978-1-138-02710-7

PY 2015

BP 915

EP 922

PG 8

WC Computer Science, Information Systems; Computer Science,  
Interdisciplinary Applications

SC Computer Science

GA BF2QG

UT WOS:000380490000123

DA 2018-05-03

ER

PT B

AU Bunster, V

Noguchi, M

Garcia-Alvarado, R

Bustamante, W

AF Bunster, Victor

Noguchi, Masa

Garcia-Alvarado, Rodrigo

Bustamante, Waldo

BE Crawford, RH

Stephan, A

TI Operational energy consumption in Chilean social housing: exploring the  
impacts of household changes

SO LIVING AND LEARNING: RESEARCH FOR A BETTER BUILT ENVIRONMENT

LA English

DT Proceedings Paper

CT 49th International Conference of the Architectural-Science-Association

CY DEC 02-04, 2015

CL Univ Melbourne, Melbourne Sch Design, Fac Architecture Bldg & Planning,  
Melbourne, AUSTRALIA

SP Architectural Sci Assoc

HO Univ Melbourne, Melbourne Sch Design, Fac Architecture Bldg &amp; Planning

DE Operational energy; forecasting; social housing; Chile

AB Recent initiatives towards the reduction of domestic energy consumption largely depend upon the availability of thorough information to enable focalised interventions and a posteriori impact assessment. This is a significant issue in developing countries, as informality of fuel markets and lack of intelligent technologies can undermine the capacity of policy makers to effectively target consumer behaviour. This study explores an alternative approach to inform such measures using energy forecasting before occupancy. Accordingly, a secondary analysis of publicly available datasets was conducted to assess general patterns of operational energy consumption in Chilean social housing and to develop a set of forecasting models which accuracy was later evaluated with the results of an on-site survey. Although the forecasting capabilities of the proposed models is not yet conclusive, the results of this study suggest that discrete socio-demographic factors can predict general patterns of operational energy consumption and therefore increase the accuracy of future energy efficiency measures.

C1 [Bunster, Victor; Noguchi, Masa] Univ Melbourne, Melbourne, Vic, Australia.  
[Garcia-Alvarado, Rodrigo] Univ Bio Bio, Concepcion, Chile.

[Bustamante, Waldo] Pontificia Univ Catolica Chile, Santiago, Chile.

RP Bunster, V (reprint author), Univ Melbourne, Melbourne, Vic, Australia.

EM v.bunster@student.unimelb.edu.au; masa.noguchi@unimelb.edu.au;  
 rgarcia@ubiobio.cl; wbustamante@uc.cl

CR Abrahamse W, 2011, HUM ECOL REV, V18, P30  
 [Ministerio de Energia CDT-CCHC], 2010, DAT EST US FIN DET C  
 Coady D., 2006, IMF WORKING PAPER  
 ECW, 2009, EN EFF GUID PUBL POW  
 Frederiks ER, 2015, ENERGIES, V8, P573, DOI 10.3390/en8010573  
 Golubchikov O., 2012, SUSTAINABLE HOUSING  
 Goodwin J., 2012, SECONDARY DATA ANAL  
 HAKIM C, 1982, SOCIOLOGY, V16, P12, DOI 10.1177/0038038582016001005  
 IEA (International Energy Agency), 2013, TRANS SUST BUILD STR  
 McLoughlin F, 2015, APPL ENERG, V141, P190, DOI 10.1016/j.apenergy.2014.12.039  
 [MIDEPLAN FSP OSUAH MIDEPLAN], 2006, DAT ENC PAN CASEN 4R  
 [MINVU MINVU], 2014, DS 47 DE 1992  
 MINVU, 2010, DAT ENC PAN VIV  
 MINVU-IC, 2006, MAN APL REGL TERM  
 Swan LG, 2009, RENEW SUST ENER REV, V13, P1819, DOI 10.1016/j.rser.2008.09.033  
 TWAS, 2008, SUST EN DEV COUNTR  
 UNTEC, 2010, EV PROGR EF EN INF F

NR 17  
 TC 0  
 Z9 0  
 U1 0  
 U2 2  
 PU UNIV MELBOURNE  
 PI PARKVILLE  
 PA FAC ARCHITECTURE BUILDING & PLANNING, PARKVILLE, 3052, AUSTRALIA  
 BN 978-0-9923835-2-7  
 PY 2015  
 BP 393  
 EP 402  
 PG 10  
 WC Architecture; Construction & Building Technology; Urban Studies  
 SC Architecture; Construction & Building Technology; Urban Studies  
 GA BF4MW  
 UT WOS:000381380100038  
 DA 2018-05-03  
 ER

PT S  
 AU Cebrat, K  
 Lechowska, W  
 AF Cebrat, Krzysztof  
 Lechowska, Weronika  
 GP SGEM  
 TI IS LOW-TECH ARCHITECTURE STILL POSSIBLE? A STUDY OF BUFFER ZONES AND  
 ENERGY EMBODIED IN BUILDINGS IN THE CONTEXT OF ENERGY CONSUMPTION  
 STANDARDS  
 SO SGEM 2015, BOOK 4: ARTS, PERFORMING ARTS, ARCHITECTURE AND DESIGN  
 SE International Multidisciplinary Scientific Conferences on Social  
 Sciences and Arts  
 LA English  
 DT Proceedings Paper  
 CT 2nd International Multidisciplinary Scientific Conference on Social  
 Sciences and Arts (SGEM 2015)  
 CY AUG 26-SEP 01, 2015  
 CL Albena, BULGARIA

SP Bulgarian Acad Sci, Acad Sci Czech Republ, Latvian Acad Sci, Polish Acad Sci, Russian Acad Sci, Serbian Acad Sci & Arts, Slovak Acad Sci, Natl Acad Sci Ukraine, Natl Acad Sci Armenia, Sci Council Japan, World Acad Sci, European Acad Sci, Arts & Lett, Acad Fine Arts Zagreb, Croatia, Croatian Acad Sci & Arts, Acad Sci Moldova, Montenegrin Acad Sci & Arts, Georgian Acad Sci, Acad Fine Arts & Design Bratislava, Russian Acad Arts, Turkish Acad Sci

DE low-tech architecture; energy intensity; embodied energy; sustainable architecture

AB Is it possible to design near zero energy buildings without the use of technologically advanced but costly solutions? Or the other way around - is the use of expensive technical solutions effective from the point of view of the energy balance of the building? Can the overall environmental costs of a home, meeting the tightening up standards of energy consumption in buildings, be higher than anticipated savings? The paper answers these questions, basing on an analysis of the results of measurements of thermal properties of real objects and computer simulation models of buildings. The paper also shows the results of analyzing the energy embodied in economic value indicator (a development of the concept of energy intensity) as an estimate of the impact of the investment on the environment, basing on statistical data.

Examples of existing passive residential buildings, indicate that it is possible to design an object in which the combined energy of solar radiation and energy coming from internal gains are sufficient to heat the entire building. However, this also requires the use of modern building materials and infrastructure for instance heat recovery and IT control of home functions.

Studies have shown that there is an optimal form, structure and equipment of buildings, above which, the desire to further improve energy efficiency, in fact increases the demand for energy. This may result from not taking into account the global environmental costs of investment, and perhaps - as encouraged by advanced technology - with the departure from the best practices of low-tech architecture, such as temperature zoning inside the building.

The paper points out the benefits of taking into account these problems as well as areas of research that still need to be developed.

C1 [Cebzat, Krzysztof; Lechowska, Weronika] Wroclaw Univ Technol, Fac Architecture, Div Environm Dev, PL-50370 Wroclaw, Poland.

RP Cebzat, K (reprint author), Wroclaw Univ Technol, Fac Architecture, Div Environm Dev, PL-50370 Wroclaw, Poland.

CR Central Statistical Office, 2014, STAT YB REP POL 2014  
Central Statistical Office, EN 2014

Hammond G.P., EMBODIED ENERGY CARB

Hegger M., 2008, ENERGY MANUAL SUSTAI

Jiao Y, 2012, ENERGBUILDINGS, V52, P20, DOI 10.1016/j.enbuild.2012.05.028

Mielczynski T., 2015, ZAWOD ARCHITEKT POLA, V44, P78

Pfundstein M., 2007, INSULATING MAT PRINC

NR 7

TC 0

Z9 0

U1 0

U2 1

PU STEF92 TECHNOLOGY LTD

PI SOFIA

PA 1 ANDREY LYAPCHEV BLVD, SOFIA, 1797, BULGARIA

SN 2367-5659

BN 978-619-7105-50-6

J9 INT MULTIDDISCIP SCI

PY 2015

BP 485

EP 492

PG 8

WC Humanities, Multidisciplinary; Social Sciences, Interdisciplinary

SC Arts & Humanities - Other Topics; Social Sciences - Other Topics

GA BE9RO

UT WOS:000378098500060

DA 2018-05-03

ER

PT 5

AU Dong, W

AF Dong Wei

BE Du, W

Zhou, X

TI Application Research of Internet of Things Technology in Building Energy Saving

SO PROCEEDINGS OF THE 2015 3RD INTERNATIONAL CONFERENCE ON MACHINERY, MATERIALS AND INFORMATION TECHNOLOGY APPLICATIONS

SE ACSR-Advances in Computer Science Research

LA English

DT Proceedings Paper

CT 3rd International Conference on Machinery, Materials and Information Technology Applications (ICMMITA)

CY NOV 28-29, 2015

CL Qingdao, PEOPLES R CHINA

DE Internet of Things; Building Energy Saving; Energy Data Management

AB Concepts, architecture, data analysis and processing methods and other technical requirements in the standard Internet of things systematically optimize and improve existing building energy consumption monitoring theory, network architecture and implementation of technology, the concept of building energy system of things, network architecture, hardware and software key technology and engineering application technology implementation, to facilitate things in the construction sector energy saving application development, improve building energy efficiency and building levels, and promote the development of industries of things, to promote China's construction development of energy-saving and emission reduction has important practical and long-term significance.

C1 [Dong Wei] Xinyu Coll, Fac Architecture &amp; Planning, Xinyu 338000, Peoples R China.

RP Dong, W (reprint author), Xinyu Coll, Fac Architecture &amp; Planning, Xinyu 338000, Peoples R China.

EM dongwei@126.com

CR Atzori L, 2010, COMPUT NETW, V54, P2787, DOI 10.1016/j.comnet.2010.05.010

GLUHAK A, 2011, COMMUNICATIONS MAGAZ, V49, P58

Mainetti L., 2011, SOFTW TEL COMP NETW, P1

Mattern F, 2010, LECT NOTES COMPUT SC, V6462, P242

Miorandi D, 2012, AD HOC NETW, V10, P1497, DOI 10.1016/j.adhoc.2012.02.016

WEI CY, 2011, EL COMM CONTR ICECC, P3650

NR 6

TC 0

Z9 0

U1 0

U2 1

PU ATLANTIS PRESS

PI PARIS

PA 29 AVENUE LAVMIERE, PARIS, 75019, FRANCE

SN 2352-538X

BN 978-94-6252-120-9

J9 ACSR ADV COMPUT

PY 2015

VL 35

BP 1884

EP 1888

PG 5

WC Automation &amp; Control Systems; Computer Science, Theory &amp; Methods; Engineering, Electrical &amp; Electronic

SC Automation &amp; Control Systems; Computer Science; Engineering

GA BE4CW

UT WOS:000371522300353

DA 2018-05-03

ER

PT 5

AU Dong, W

AF Dong Wei

BE Liang, Z

Li, X

TI Web-based Building Energy Consumption Monitoring and Conservation

Service

SO PROCEEDINGS OF THE 4TH INTERNATIONAL CONFERENCE ON MECHATRONICS,

MATERIALS, CHEMISTRY AND COMPUTER ENGINEERING 2015 (ICMMCCE 2015)

SE ACSR-Advances in Computer Science Research

LA English

DT Proceedings Paper

CT 4th International Conference on Mechatronics, Materials, Chemistry and

Computer Engineering (ICMMCCE)

CY DEC 12-13, 2015

CL Xian, PEOPLES R CHINA

DE Web; Building Energy Saving; Energy Monitoring; Conservation Service

ID INTERNET; THINGS

AB Building in operational use energy consumption including energy consumption of buildings in the course of the lighting, refrigeration equipment, power equipment and services, gas, water, elevators and the like. In energy-efficient buildings, not only to emphasize energy conservation technology, but also need to dig the whole building energy monitoring and management, so as to form the overall building energy consumption of energy-saving programs. ODBC and web-based technologies to enable the effective monitoring and building energy management. Web-based building energy monitoring and energy services platform can make full use of networking technology, will affect building energy consumption data management system as well as larger storage devices and management, analysis and processing, and use, from the point of view of energy efficiency optimization, to achieve the overall operation of building intelligent online monitoring, processing, and energy-saving models predict that provide openness energy services, greatly enhance the operation and management level of the entire building and energy efficiency utilization levels.

C1 [Dong Wei] Xinyu Coll, Fac Architecture & Planning, Xinyu 338000, Peoples R China.

RP Dong, W (reprint author), Xinyu Coll, Fac Architecture & Planning, Xinyu 338000, Peoples R China.

EM dongwei@126.com

CR Bandyopadhyay D, 2011, WIRELESS PERS COMMUN, V58, P49, DOI 10.1007/s11277-011-0288-5

Domingo MC, 2012, J NETW COMPUT APPL, V35, P584, DOI 10.1016/j.jnca.2011.10.015

Chen YK, 2012, ASIA S PACIF DES AUT, P383, DOI 10.1109/ASPDAC.2012.6164978

DAXU L, 2014, INFORMAT, V10, P2233, DOI DOI 10.1109/TII.2014.2300753

Fleisch E., 2010, EC MANAGEMENT FINANC, P125

Gubbi J, 2013, FUTURE GENER COMP SY, V29, P1645, DOI 10.1016/j.future.2013.01.010

Guinard D., 2009, WORKSH MASH ENT MASH, P15

NR 7

TC 0

Z9 0

U1 0

U2 1

PU ATLANTIS PRESS

PI PARIS

PA 29 AVENUE LAVMIERE, PARIS, 75019, FRANCE

SN 2352-538X

BN 978-94-6252-133-9

J9 ACSR ADV COMPUT

PY 2015

VL 39

BP 3036

EP 3040

PG 5

WC Engineering, Electrical & Electronic; Engineering, Mechanical; Materials

Science, Multidisciplinary  
 SC Engineering; Materials Science  
 GA BE5OR  
 UT WOS:000373157303016  
 DA 2018-05-03  
 ER

PT 5

AU Guan, Q

Liu, Y

AF Guan, Qiang

Liu, Yu

GP IEEE

TI Study on Comfort Environment Oriented Building Energy Consumption

Intelligent Management System

SO 2015 27TH CHINESE CONTROL AND DECISION CONFERENCE (CCDC)

SE Chinese Control and Decision Conference

LA Chinese

DT Proceedings Paper

CT 27th Chinese Control and Decision Conference (CCDC)

CY MAY 23-25, 2015

CL Qingdao, PEOPLES R CHINA

SP IEEE Ind Elect Chapter, Qingdao Univ, IEEE Control Syst Soc, Syst Engrn Soc China, Chinese Assoc

Artificial Intelligence, Chinese Assoc Automat, Tech Comm Control Theory, Northeastern Univ

DE building energy consumption management; comfort environment;

multi-sensor integration; complex event processing

AB The IOT-based building energy consumption management system, as an important technology management means for energy efficiency, is prevalent and applied widely. Nevertheless, the requirement of occupant comfort environment is rarely considered in most previous studies. In this paper, based on intelligent sensing technology, we put forward a novel system framework for building energy consumption management systems, which focuses on providing the comfort environment for occupants in energy saving. Firstly, the energy efficiency sensing and control unit is developed, which consists of several sensors for environment comfort evaluation and data fusion. In addition, the feedback control is realized in this unit through multi-sensor integration and GPIO ports. The concept of collaborating with people, machine and substance is reflected in the working process of this unit. Secondly, the relation between environment factors and energy consumption control is clearly described with the event-based ECA-rules. The real-time response to environment sensing and energy consumption data streams is achieved by utilizing complex event processing. Finally, the application scenarios show the benefits of the proposed system architecture.

C1 [Guan, Qiang; Liu, Yu] Chinese Acad Sci, Inst Automat, Beijing 100190, Peoples R China.

RP Guan, Q (reprint author), Chinese Acad Sci, Inst Automat, Beijing 100190, Peoples R China.

EM qiang.guan@ia.ac.cn; yu.liu@ia.ac.cn

CR Dounis AI, 2009, RENEW SUST ENERG REV, V13, P1246, DOI 10.1016/j.rser.2008.09.015

Fanger P. O., 1970, THERMAL COMFORT ANAL

Frontczak M., 2013, BUILD ENVIRON, V46, P922

Han J, 2007, BUILD ENVIRON, V42, P4043, DOI 10.1016/j.buildenv.2006.06.028

Jiang Yunliang, 2006, CONSTRUCTION TECHNOL, P11

Luckham D. C., 2001, POWER EVENTS INTRO C

Seven H., 2011, REASONING EVENT BASE

Wan XF, 2008, J THERM BIOL, V33, P87, DOI 10.1016/j.jtherbio.2007.11.002

Wang FS, 2009, VLDB J, V18, P913, DOI 10.1007/s00778-009-0139-0

NR 9

TC 0

Z9 0

U1 0

U2 1

PU IEEE

PI NEW YORK



PA 345 E 47TH ST, NEW YORK, NY 10017 USA  
 SN 1948-9439  
 BN 978-1-4799-7016-2  
 J9 CHIN CONT DECIS CONF  
 PY 2015  
 BP 5880  
 EP 5884  
 PG 5  
 WC Automation & Control Systems; Engineering, Electrical & Electronic  
 SC Automation & Control Systems; Engineering  
 GA BE7GY  
 UT WOS:000375232901053  
 DA 2018-05-03  
 ER

PT B

AU Kadolsky, M

Windisch, R

Scherer, RJ

AF Kadolsky, Mathias

Windisch, Ronny

Scherer, Raimar J.

GP IEEE

TI Knowledge Management Framework for Monitoring Systems improving Building

Energy Efficiency

SO 2015 IEEE WORKSHOP ON ENVIRONMENTAL, ENERGY AND STRUCTURAL MONITORING  
 SYSTEMS (EESMS)

LA English

DT Proceedings Paper

CT IEEE Workshop on Environment Energy Structural Monitoring Systems

CY JUL 09-10, 2015

CL Trento, ITALY

SP IEEE, IEEE SYST COUNCIL, IEEE ITALY SECT, IEEE INSTRUMENTATION MEASUREMENT SOC,  
 UNIV TRENTO

DE BIM; eeBIM; Energy; Knowledge Management; Ontology; Intelligent

Filtering; Building Performance Criteria

AB In the last decades scarcity of resources and global warming have led to a more and more efficient building design and usage aimed to reduce energy consumption and CO<sub>2</sub> emission. For increasing energy efficiency of buildings over the whole life cycle monitoring systems became an important technology. Thereby, monitoring systems are usually applied in combination with controlling systems for providing building automation of HVAC (heating, ventilation and air conditioning) components in the usage phase. In this paper an approach will be presented describing a generic framework for efficiently using of monitoring in the design phase as well as in the usage phase. Based on certain building criteria a) the selection for an efficient, best cost- benefit, HVAC system and b) the efficient filtering, evaluating and prioritizing of energy performance values like cooling/heating consumption values will be supported. This will be done by considering only a small set of energy indicators representing and covering complex building designs and usage scenarios. As description method for the building criteria an ontology approach is considered comprising and consolidating the different input sources and creating the base for deriving and identifying these criteria. Furthermore, intelligent filtering methods are proposed operating on the origin source models and filtering and aggregating the elements for mapping them to the ontology descriptions. Altogether is embedded in a knowledge management framework forming the mediator for external software like simulation or CAD software. The use of the knowledge management framework is intended for a company applying it throughout several projects and storing the gained experience in the building criteria and the related functionalities.

C1 [Kadolsky, Mathias; Scherer, Raimar J.] Tech Univ Dresden, Inst Construct Informat, D-01187 Dresden, Germany.

[Windisch, Ronny] Iproplan Planungsgesell mbH, Consulting Engineers & Architects, D-09126 Chemnitz, Germany.

RP Kadolsky, M (reprint author), Tech Univ Dresden, Inst Construct Informat, D-01187 Dresden, Germany.  
EM mathias.kadolsky@tu-dresden.de; windisch.ronny@iproplan.de;

raimar.scherer@tu-dresden.de

CR Baumgartel K, 2013, FORUM BAUINFORMATIK, V25, P25

Baumgartel K., 2012, EUR C PROD PROC MOD

Beetz J, 2008, ARTIFICIAL INTELLIGE

Kadolsky M., 2014, ISES DELIVERABLE D3

Piette M.-A., 2001, P ENERGY BUILDINGS, V33, P783

Windisch R., 2012, 2012 EG IC WORKSH

NR 6

TC 0

Z9 0

U1 2

U2 8

PU IEEE

PI NEW YORK

PA 345 E 47TH ST, NEW YORK, NY 10017 USA

BN 978-1-4799-8215-8

PY 2015

BP 33

EP 38

PG 6

WC Computer Science, Artificial Intelligence; Energy & Fuels; Engineering,  
Electrical & Electronic

SC Computer Science; Energy & Fuels; Engineering

GA BF1RB

UT WOS:000380429500007

DA 2018-05-03

ER

PT S

AU Kumar, JS

Swarup, KS

AF Kumar, J. Santosh

Swarup, K. Shanti

BE Pillai, P

Hu, YF

Otung, I

Giambene, G

TI Residential Energy Consumption Scheduling Techniques Under Smart Grid  
Environment

SO WIRELESS AND SATELLITE SYSTEMS (WISATS 2015)

SE Lecture Notes of the Institute for Computer Sciences Social Informatics  
and Telecommunications Engineering

LA English

DT Proceedings Paper

CT 7th International Conference on Wireless and Satellite Systems (WiSATS)

CY JUL 06-07, 2015

CL Univ Bradford, Norcroft Ctr, Bradford, ENGLAND

SP CREATE NET, Univ Bradford, Fac Engn & Informat, European Alliance Innovat, Inst Comp Sci, Social  
Informat & Telecommunicat Engrn

HO Univ Bradford, Norcroft Ctr

DE Smart grid; Demand side management; Energy consumption scheduling; Peak  
load demand; Energy pricing

AB In recent years the load demand by residential consumers are rapidly increasing due to the usage of many electric appliances in daily needs. Load demand during peak hours is becoming increasingly larger than off-peak hours, which is the major reason for inefficiency in generation capacity. Introduction of smart grid technology in Demand Side Management programs provides an alternative to installation of new

generation units. Consumers can play a major role in reducing their energy consumption by communicating with utilities so that they can minimize their energy costs and get incentives, which also helps utilities in many ways. Smart grid technologies provide opportunities to employ different pricing schemes which also help in increasing the efficiency of appliance scheduling techniques. Optimal energy consumption scheduling reduces the peak load demand in peak hour. Peak average ratio (PAR) also minimizes the energy consumption cost. In this paper, we observe different energy consumption scheduling techniques that schedule the house hold appliances in real-time to achieve minimum energy consumption cost and to reduce peak load demand in peak hours to shape the peak load demand. Formulation and Solution methodology of residential energy consumption scheduling is presented with simulation results illustrating the working of the model.

C1 [Kumar, J. Santosh; Swarup, K. Shanti] Indian Inst Technol, Dept Elect Engn, Madras 600036, Tamil Nadu, India.

RP Swarup, KS (reprint author), Indian Inst Technol, Dept Elect Engn, Madras 600036, Tamil Nadu, India.

EM santoshlots@gmail.com; swarup@ee.iitm.ac.in

CR [Anonymous], 2011, ASS DEM RESP ADV MET

Geletu A., 2007, SOLVING OPTIMIZATION

Kondoh J., 2011, IEEE POW EN SOC GEN, P1

Masters Gilbert M., 2004, RENEWABLE EFFICIENT

Mohsenian-Rad V., 2010, IEEE T SMART GRID, V1, P320

Salinas S., 2013, IEEE T SMART GRID, V4, P341, DOI 10.1109/TSG.2012.2214068

Strbac G., 2008, ENERG POLICY, V36, P4419, DOI 10.1016/j.enpol.2008.09.030

Venkataraman P., 2005, APPL OPTIMIZATION MA

Wood AJ., 1996, POWER GENERATION OPE

Zhang Q., 2009, 6 INT C EUR EN MARK

Zhu Z., 2011, P IEEE GLOBECOM WORK

NR 11

TC 0

Z9 0

U1 0

U2 0

PU SPRINGER

PI NEW YORK

PA 233 SPRING STREET, NEW YORK, NY 10013, UNITED STATES

SN 1867-8211

BN 978-3-319-25479-1; 978-3-319-25478-4

J9 L N INST COMP SCI SO

PY 2015

VL 154

BP 3

EP 17

DI 10.1007/978-3-319-25479-1\_1

PG 15

WC Computer Science, Information Systems; Engineering, Electrical & Electronic; Telecommunications

SC Computer Science; Engineering; Telecommunications

GA BE9GL

UT WOS:000377503500001

DA 2018-05-03

ER

PT B

AU Lachhab, F

Essaaidi, M

Bakhouya, M

Ouladsine, R

AF Lachhab, Fadwa

Essaaidi, Mohammed

Bakhouya, Mohamed

- Ouladsine, Radouane  
 BE Essaaidi, M  
 Zaz, Y  
 TI A State-Feedback Approach for Controlling Ventilation Systems in Energy Efficient Buildings  
 SO PROCEEDINGS OF 2015 3RD IEEE INTERNATIONAL RENEWABLE AND SUSTAINABLE ENERGY CONFERENCE (IRSEC'15)  
 LA English  
 DT Proceedings Paper  
 CT 3rd IEEE International Renewable and Sustainable Energy Conference (IRSEC)  
 CY DEC 10-13, 2015  
 CL Marrakech, MOROCCO  
 SP IEEE  
 DE Energy efficiency in real building; IAQ; CO<sub>2</sub>-based control; state feedback technique; Occupant comfort  
 ID MODEL  
 AB On the fast actual demographic trend and increasing comfort level, consumers are becoming more and more demanding in the areas of heating, cooling, ventilation, air conditioning, and lighting. Heating, Ventilating and Air Conditioning (HVAC) is one of most studied systems in energy efficient buildings within the aim to keep occupants' comfort with desired temperature ranges, a suitable level of humidity, and good air quality. Recent studies showed that using information and communication technologies will have a significant impact on improving energy efficiency in real buildings. The main aim of these studies is to develop energy control approaches to improve energy performance and occupant comfort in buildings. In this paper, a CO<sub>2</sub>-based strategy using a state feedback technique for controlling mechanical ventilation systems in energy-efficient building is proposed. The principal objective of the developed controller is to improve optimal balance between energy efficiency and indoor air quality by maintaining the indoor CO<sub>2</sub> concentration at the comfort set point with an efficient ventilation rate while reducing energy consumption. The ventilation system is analysed, modeled, and simulated. The simulation results are reported to show the efficiency of the proposed control approach compared to the traditional On/Off and the PI ventilation control.
- C1 [Lachhab, Fadwa; Essaaidi, Mohammed] ENSIAS Mohammed V Souissi Univ, Rabat, Morocco.  
 [Bakhouya, Mohamed; Ouladsine, Radouane] Int Univ Rabat Technopolis, Sala El Jadida, Morocco.  
 RP Lachhab, F (reprint author), ENSIAS Mohammed V Souissi Univ, Rabat, Morocco.  
 EM fadwa.lechhab@gmail.com; m.essaaidi@ensias.ma;  
 mohamed.bakhouya@uir.ac.ma; radouane.ouladsine@uir.ac.ma
- CR BERG-MUNCH B, 1986, Environment International, V12, P195, DOI 10.1016/0160-4120(86)90030-9  
 Burghes D., 1980, INTRO CONTROL THEORY  
 El Mankibi M, 2009, BUILD ENVIRON, V44, P1356, DOI 10.1016/j.buildenv.2008.06.003  
 Fanger P. O., 1983, P ENG FDN C MAN ATM, P45  
 Feustel HE, 1990, FUNDAMENTALS MULTIZO  
 GUNNAR Kjell Folkesson, 2005, RECOMMENDATIONS CALC  
 Inoue T, 1988, ASHRAE T, V104, P1034  
 Kim JT, 2010, BUILD ENVIRON, V45, P256, DOI 10.1016/j.buildenv.2009.08.024  
 Lachhab F., 2015, NONLINEAR SYST UNPUB  
 LUTE P. J., 1989, P CLIMA2000, V2, P290  
 Mohsenian-Rad A.-H., 2010, IEEE T SMART GRID, V1, P120, DOI DOI 10.1109/TSG.2010.2055903  
 Nesler CG, 1986, CONTROL SYSTEMS MAGA, V6, P9  
 Oldewurtel F, 2012, ENER BUILDINGS, V45, P15, DOI 10.1016/j.enbuild.2011.09.022  
 Orge-Vorsatz D., 2007, BUILD RES INF, V35, P458  
 Reinhart CF, 2004, SOL ENERGY, V77, P15, DOI 10.1016/j.solener.2004.04.003  
 Sagerschnig C., 2011, P CISBAT, P14  
 Salat S, 2005, BUILD RES INF, V37, P598  
 Yao RM, 2009, BUILD ENVIRON, V44, P2089, DOI 10.1016/j.buildenv.2009.02.014  
 Yeh L. W., 2010, SENSORS J IEEE, V10, P1029, DOI DOI 10.1109/JSEN.2010.2042442  
 Zannetti P, 2013, AIR POLLUTION MODELI
- NR 20  
 TC 0

Z9 0  
 U1 0  
 U2 0  
 PU IEEE  
 PI NEW YORK  
 PA 345 E 47TH ST, NEW YORK, NY 10017 USA  
 BN 978-1-4673-7894-9  
 PY 2015  
 BP 665  
 EP 670  
 PG 6  
 WC Energy & Fuels; Engineering, Electrical & Electronic  
 SC Energy & Fuels; Engineering  
 GA BF5KQ  
 UT WOS:000382162300064  
 DA 2018-05-03  
 ER

PT J

AU Laicane, I  
 Blumberga, A  
 Rosa, M  
 Blumberga, D  
 Bariss, U

AF Laicane, Ilze  
 Blumberga, Andra  
 Rosa, Marika  
 Blumberga, Dagnija  
 Bariss, Uldis

TI Development of methodology for the assessment of changes in household  
 electricity consumption and calculation of CO2 emissions

SO INTERNATIONAL JOURNAL OF GLOBAL WARMING

LA English

DT Article

DE smart metering; household electricity consumption; CO2 emissions; global  
 warming

ID ENERGY-CONSERVATION; BEHAVIOR; FEEDBACK; DETERMINANTS; PREFERENCES;  
 FEATURES; CLIMATE; DEMAND; POLICY; CHINA

AB This study outlines a methodology for assessing changes in household electricity consumption and CO2 emissions. The method is proposed to analyse large datasets of residential electricity consumption in the case study of the first smart metering pilot project in Latvia. The goal of the project is to achieve a reduction of electricity consumption in households by 10%. In order to do so project aims to increase household user's awareness of smart technologies, as well as to promote households' involvement in energy efficiency measures. The proposed methodology is based on several steps, including: 1) baseline situation analysis; 2) normalisation of electricity consumption data; 3) identification of the factors affecting household electricity consumption; 4) an empirical analysis of households' electricity consumption using regression analysis; 5) assessment of changes in electricity consumption at the end of evaluation period and 6) calculation of CO2 emissions. Finally, the first results of the smart metering pilot project in nine-month period have been presented. The recommendations for policy development on promoting smart metering have been raised at the end of this paper.

C1 [Laicane, Ilze; Blumberga, Andra; Rosa, Marika; Blumberga, Dagnija] Riga Tech Univ, Inst Energy Syst & Environm, Fac Power & Elect Engn, LV-1010 Riga, Latvia.  
 [Bariss, Uldis] Publ Ltd Co Latvenergo, LV-1230 Riga, Latvia.

RP Laicane, I (reprint author), Riga Tech Univ, Inst Energy Syst & Environm, Fac Power & Elect Engn, Kronvalda Blvd 1, LV-1010 Riga, Latvia.

EM ilze.laicane@rtu.lv; andra.blumberga@rtu.lv; marika.rosa@rtu.lv;  
 dagnija.blumberga@rtu.lv; uldis.bariss@latvenergo.lv

OI Blumberga, Andra/0000-0002-4712-4794

- CR Abrahamse W, 2005, J ENVIRON PSYCHOL, V25, P273, DOI 10.1016/j.jenvp.2005.08.002
- Allcott H, 2010, SCIENCE, V327, P1204, DOI 10.1126/science.1180775
- Barr S, 2005, ENER POLICY, V33, P1425, DOI 10.1016/j.enpol.2003.12.016
- Bartusch C, 2012, APPL ENER, V92, P637, DOI 10.1016/j.apenergy.2011.04.034
- Bertoldi P, 2012, ENERGY EFFICIENCY ST
- Bertoldi P., 2010, 24360 EUR EN COMM LO
- Blazquez L., 2012, 82 CTR EN POL EC
- Carlsson-Kanyama A, 2007, ENER POLICY, V35, P2163, DOI 10.1016/j.enpol.2006.06.018
- Carlsson Kanyama, 2005, INT J CONSUM STUD, V29, P239, DOI [10.1111/j.1470-6431.2005.00409.x, DOI 10.1111/J.1470-6431.2005.00409.X]
- Cayla JM, 2011, ENER POLICY, V39, P7874, DOI 10.1016/j.enpol.2011.09.036
- Chen J, 2013, ENER BUILDINGS, V66, P193, DOI 10.1016/j.enbuild.2013.07.045
- Darby S., 2006, REV DEFRA LIT METERI
- Darby S, 2010, BUILD RES INF, V38, P442, DOI 10.1080/09613218.2010.492660
- DG for Energy and Transport, 2007, EUR EN TRANSP 2030
- Directive 2006/12/EC, 2006, OFFICIAL J EUROPEA L, V114/9
- EC (European Commission), 2009, OFFICIAL J EUROPEAN
- [Anonymous], 2012, ADV MET INFR CSE COU
- Fischer C, 2008, ENER EFFIC, V1, P79, DOI 10.1007/s12053-008-9009-7
- Gleerup M., 2010, ENERGY J, V31, P111
- Hamidi S., 2012, RESIDENTIAL ENERGY C
- Hart F.M., 2004, ENER BUILDINGS, V36, P161
- Hierzinger R., 2012, EUROPEAN SMART METER
- Hunter LM, 2005, SOC SCI J, V42, P25, DOI 10.1016/j.socij.2004.11.003
- IPCC Guidelines, 2006, GUIDELINES NATL GREE, V2
- Jensen O. M., 2003, P 2003 SUMM STUD EUR, P451
- Jessoe K., 2012, KNOWLEDGE IS LESS PO
- Kavousian A., 2012, WP130 CIFE STANF U
- Kavousian A, 2013, ENERGY, V55, P184, DOI 10.1016/j.energy.2013.03.086
- Kilian L., 2007, 6559 CEPR
- Laicane I., 2013, Agronomy Research, V11, P335
- Laicane I., 2013, P INT C 8 WSEAS INT, P148
- Laicane I., 2013, P 2013 EUR C 2013 EU, P1
- Latvian Environment Geology and Meteorology Centre State Ltd., 2012, METH CALC CO2 EM STA
- Leahy E., 2009, 277 ESRI
- Linden AL, 2006, ENER POLICY, V34, P1918, DOI 10.1016/j.enpol.2005.01.015
- McLoughlin F, 2012, ENER BUILDINGS, V48, P240, DOI 10.1016/j.enbuild.2012.01.037
- O'Doherty J, 2008, APPL ENER, V85, P650, DOI 10.1016/j.apenergy.2008.01.001
- Ouyang JL, 2009, ENER BUILDINGS, V41, P711, DOI 10.1016/j.enbuild.2009.02.003
- Parker DS, 2003, ENER BUILDINGS, V35, P863, DOI 10.1016/S0378-7788(02)00244-X
- Poortinga W, 2003, J ECON PSYCHOL, V24, P49, DOI 10.1016/S0167-4870(02)00154-X
- REALpac, 2012, REALPAC EN NORM METH
- Sanquist TF, 2012, ENER POLICY, V42, P354, DOI 10.1016/j.enpol.2011.11.092
- Santamouris M, 2007, ENER BUILDINGS, V39, P893, DOI 10.1016/j.enbuild.2006.11.001
- Sardianou E, 2007, ENER POLICY, V35, P3778, DOI 10.1016/j.enpol.2007.01.020
- Schleich J, 2013, ENER POLICY, V61, P1097, DOI 10.1016/j.enpol.2013.05.012
- SEAP Technical Annex, 2009, TECHN ANN SEAP TEMPL
- Theodoridou I, 2011, ENER BUILDINGS, V43, P2422, DOI 10.1016/j.enbuild.2011.05.034
- Thomas BA, 2013, ECOL ECON, V86, P199, DOI 10.1016/j.ecolecon.2012.12.003
- US Energy Information Administration, 2012, ANN EN OUTL 2012
- Vassileva I, 2012, APPL ENER, V93, P575, DOI 10.1016/j.apenergy.2011.12.067
- Wiesmann D, 2011, ENER POLICY, V39, P2772, DOI 10.1016/j.enpol.2011.02.047
- Yohanis YG, 2008, ENER BUILDINGS, V40, P1053, DOI 10.1016/j.enbuild.2007.09.001
- Zhou SJ, 2013, ENER POLICY, V61, P394, DOI 10.1016/j.enpol.2013.06.092
- Zimmermann J. P., 2009, 17052743 SWED EN AG

NR 54

TC 0

Z9 0

U1 2  
U2 10  
PU INDERSCIENCE ENTERPRISES LTD  
PI GENEVA  
PA WORLD TRADE CENTER BLDG, 29 ROUTE DE PRE-BOIS, CASE POSTALE 856, CH-1215  
GENEVA, SWITZERLAND  
SN 1758-2083  
EI 1758-2091  
J9 INT J GLOBAL WARM  
JI Int. J. Glob. Warm.  
PY 2015  
VL 8  
IS 1  
BP 114  
EP 131  
DI 10.1504/IJGW.2015.071582  
PG 18  
WC Environmental Sciences  
SC Environmental Sciences & Ecology  
GA CV4FG  
UT WOS:000364221700008  
DA 2018-05-03  
ER

PT B

AU Lee, YC  
Chuang, CY  
Chen, YC  
Hsueh, CW

AF Lee, Yuan-Cheng  
Chuang, Chih-Yao  
Chen, Yung-Chieh  
Hsueh, Chih-Wen

GP IEEE

TI An Efficient Scheduling Mechanism for Building Energy Management Systems  
SO 2015 IEEE INTERNATIONAL CONFERENCE ON BUILDING ENERGY EFFICIENCY AND  
SUSTAINABLE TECHNOLOGIES (ICBEST)

LA English

DT Proceedings Paper

CT IEEE International Conference on Building Energy Efficiency and  
Sustainable Technologies (ICBEST)

CY AUG 31-SEP 01, 2015

CL Singapore, SINGAPORE

SP IEEE, IEEE Ind Applicat Soc, IEEE Power Elect Soc

DE building energy management; energy consumption; real-time systems;  
scheduling

AB The continuous growth of energy consumption has become a critical issue globally. According to the international energy agency, the energy consumed in residential and commercial buildings contributed about 40% of the total energy consumption in 2014. In recent years, building energy management has become a popular research topic. The techniques used in automatic control have evolved from static schedules specified manually into real-time sensing through wireless sensor network. The demand for a dedicated platform for building energy management systems has emerged later. Many proposed platforms focused on the high-level architecture and were based on existing standards and technologies. However, there was little research about the fundamental aspects of the infrastructure. In this paper, we propose a scheduling mechanism for the fundamental infrastructure based on the distributed pinwheel model. It addresses the issues of distributed real-time computing, and provides a more predictable system behavior for potential improvement of energy consumption of the infrastructure itself. Unlike the original distributed pinwheel model, we also take network delay into account, and present an adaptive method to

mitigate the effects of variable network delay. The simulation results suggest that the total end-to-end delay can be reduced to 20% or lower for more than half of the input task sets without the presence of variable network delay. The adaptive method shows an improvement of 10.06% to 61.16% with the presence of variable network delay.

C1 [Lee, Yuan-Cheng; Chuang, Chih-Yao; Chen, Yung-Chieh; Hsueh, Chih-Wen] Natl Taiwan Univ, Grad Inst Networking & Multimedia, Taipei 106, Taiwan.

RP Lee, YC (reprint author), Natl Taiwan Univ, Grad Inst Networking & Multimedia, Taipei 106, Taiwan.

EM d00944007@csie.ntu.edu.tw; r03944005@csie.ntu.edu.tw;

b99902074@csie.ntu.edu.tw; cwhsueh@csie.ntu.edu.tw

FU ROC National Science Council [NSC 102-2221-E-002-079-MY2]

FX This research was supported in part by a grant from the ROC National Science Council, NSC 102-2221-E-002-079-MY2.

CR Agarwal Y, 2010, BUILDSYS 10, P1, DOI 10.1145/1878431.1878433

Barbato A., 2009, BUILDSYS, P49

Brandemuehl M. J., 1999, TECH REP

Erickson V., 2009, BUILDSYS 09, P19

Fortino G, 2012, J NETW COMPUT APPL, V35, P1934, DOI 10.1016/j.jnca.2012.07.016

Guinard A., 2009, BUILDSYS, P25

HAN CC, 1992, P IEEE REAL TIM SYST, P300

Hsueh CW, 2001, IEEE T COMPUT, V50, P51, DOI 10.1109/12.902752

I. E. Agency, 2014, ENERGY EFFICIENCY

Kamthe A., 2011, BUILDSYS 11, P31

Masoudifar N, 2014, WINT SIMUL C PROC, P1108, DOI 10.1109/WSC.2014.7019969

Melfi R., 2011, IGCC INT GREEN COMPU, P1

Qiao B, 2006, 2006 IEEE/WIC/ACM INTERNATIONAL CONFERENCE ON INTELLIGENT AGENT TECHNOLOGY, PROCEEDINGS, P653, DOI 10.1109/IAT.2006.17

NR 13

TC 0

Z9 0

U1 0

U2 0

PU IEEE

PI NEW YORK

PA 345 E 47TH ST, NEW YORK, NY 10017 USA

BN 978-1-5090-0160-6

PY 2015

BP 17

EP 22

PG 6

WC Construction & Building Technology; GREEN & SUSTAINABLE SCIENCE & TECHNOLOGY

SC Construction & Building Technology; Science & Technology - Other Topics

GA BG8IJ

UT WOS:000392316600003

DA 2018-05-03

ER

FN Clarivate Analytics Web of Science

VR 1.0

PT S

AU Li, WF

AF Li Weifang

BE Choi, SB

TI The Study on Green Energy-saving Buildings Design

SO PROCEEDINGS OF THE 2015 INTERNATIONAL FORUM ON ENERGY, ENVIRONMENT SCIENCE AND MATERIALS

SE AER-Advances in Engineering Research

LA English

DT Proceedings Paper



CT International Forum on Energy, Environment Science and Materials  
(IFEESM)

CY SEP 25-26, 2015

CL Shenzhen, PEOPLES R CHINA

DE Green Buildings; Energy-saving; Design; Implementing Proposals

AB As advocating a low-carbon lifestyle and increasing resources crisis, the green energy-saving buildings have profound implications for our country's development and environment protection. Analyzing key techniques of energy-saving about green buildings from design link, because of design is a starting point for green buildings. In China, there are some problems in energy-saving design of green buildings because of lacking in experience and still immature technology. In order to improve the design quality of green energy-saving buildings, positive passive techniques and high efficient active techniques and design ideas according to local conditions should be adopted in China.

C1 [Li Weifang] Wuhan Univ Sci & Technol, Sch Management, Wuhan 430081, Peoples R China.

RP Li, WF (reprint author), Wuhan Univ Sci & Technol, Sch Management, Wuhan 430081, Peoples R China.

CR Building energy efficiency research center of Tsinghua university, 2012, 2012 ANN REP CHIN BU, P2

Duan Haitao, 2015, DEV GUIDE BUILDING M, p131~132

Kang Shouhe, 2015, SHANXI ARCHITECTURE, V41, p203~204

Ren Haibin, 2013, SHANXI ARCHITECTURE, P201

NR 4

TC 0

Z9 0

U1 0

U2 0

PU ATLANTIS PRESS

PI PARIS

PA 29 AVENUE LAVMIERE, PARIS, 75019, FRANCE

SN 2352-5401

BN 978-94-6252-117-9

J9 AER ADV ENG RES

PY 2015

VL 40

BP 1149

EP 1153

PG 5

WC Energy & Fuels; Engineering, Multidisciplinary; Environmental Sciences

SC Energy & Fuels; Engineering; Environmental Sciences & Ecology

GA BE3NR

UT WOS:000371023700212

DA 2018-05-03

ER

PT B

AU Marquez, L

McGregor, J

Seo, S

Walton, A

Moglia, M

Higgins, A

Gardner, J

AF Marquez, Leorey

McGregor, James

Seo, Seongwon

Walton, Andrea

Moglia, Magnus

Higgins, Andrew

Gardner, John

BE Weber, T

McPhee, MJ

Anderssen, RS

TI Modeling the adoption of energy efficient retrofits by mid-tier

commercial buildings

SO 21ST INTERNATIONAL CONGRESS ON MODELLING AND SIMULATION (MODSIM2015)

LA English

DT Proceedings Paper

CT 21st International Congress on Modelling and Simulation (MODSIM) held

jointly with the 23rd National Conference of the

Australian-Society-for-Operations-Research / DSTO led Defence Operations

Research Symposium (DORS

CY NOV 29-DEC 04, 2015

CL Gold Coast, AUSTRALIA

SP BMT WBM, CSIRO, UNSW Australia Canberra, Griffith Univ, Deltares, Modelling & Simulat Soc

Australia & New Zealand, Australian Soc Operat Res, DSTO, Gold Coast Tourism Corp

DE Agent-based modeling; simulation modeling; energy efficient retrofits;

commercial buildings

AB The low uptake of cost effective, energy efficient retrofits for commercial buildings suggests that economic considerations are not the sole determinant for their adoption. Socio-psychological surveys provide additional insights into consumption behaviour reflecting important lifestyle, attitudinal, risk, familiarity of technology, cultural and other forms of demographic preferences. There is a need for an evidence based tool that can forecast the effectiveness of intervention options for commercial buildings whilst removing the confounding effects of business-as-usual strategies. This paper describes a framework for evaluating the uptake of building retrofits under various government policy and behaviour program interventions aimed at reducing carbon emissions. The framework incorporates socio-psychological factors into an agent based model, applying diffusion and discrete choice modeling in evaluating the effectiveness of intervention programs, especially those involving direct subsidies (e.g. rebate to upfront costs, tax deductions) to facilitate the uptake of low carbon living practices. This framework is implemented in the ZEO Uptake Analysis Tool which allows planners, researchers and policy makers to assess the relative impact of assumptions about future technology and policy using a defined baseline (or "business as usual" scenario) for comparison. The Tool uses agent-based modeling and simulation (ABMS) to encapsulate the attributes and behaviour of various elements and entities in the building retrofit problem. The paper presents preliminary results from application of the agent-based model to the State of Victoria building stock, in a case study to understand the potential of the Energy Efficient Office Buildings Program in the uptake of energy efficient retrofits. The analysis indicates that the proposed policy options offered by EEOB have very little impact when we consider small building owners and limit the application to building tuning only. There is improvement in uptake when we expand the eligibility to all technologies (excluding lighting) and this is dominated by HVAC (Chiller) upgrades.

C1 [Marquez, Leorey] CSIRO Digital Prod, Gate 5, Normanby Rd, Clayton, Vic 3168, Australia.

[McGregor, James] CSIRO Energy Transformed, Newcastle, NSW 2304, Australia.

[Seo, Seongwon; Walton, Andrea; Moglia, Magnus; Higgins, Andrew; Gardner, John] CSIRO Land & Water, Dutton Pk, Qld 4102, Australia.

RP Marquez, L (reprint author), CSIRO Digital Prod, Gate 5, Normanby Rd, Clayton, Vic 3168, Australia.

EM leorey.marquez@csiro.au

CR Higgins A., 2012, FORECASTING UPTAKE R

Langdon Davis, 2013, NEXT WAVE RETROFITTI

Marquez L., 2012, CSIRO ENERGY TRANSFO

McGregor J., 2015, RP3002 CRC

Seo S, 2015, ENERGY SAVING UNPUB

Sustainability Australia, 2013, EN EFF OFF BUILD PRO

NR 6

TC 0

Z9 0

U1 0

U2 0

PU MODELLING & SIMULATION SOC AUSTRALIA & NEW ZEALAND INC

PI CHRISTCHURCH

PA MSSANZ, CHRISTCHURCH, 00000, NEW ZEALAND

BN 978-0-9872143-5-5

PY 2015

BP 1909

EP 1915

PG 7

WC Computer Science, Interdisciplinary Applications; Operations Research & Management Science; Mathematics, Applied

SC Computer Science; Operations Research & Management Science; Mathematics

GA BI2XC

UT WOS:000410535400274

DA 2018-05-03

ER

PT S

AU Moga, L

Moga, I

AF Moga, Ligia

Moga, Ioan

GP SGEM

TI SUSTAINABLE SOLUTIONS FOR ENERGY EFFICIENCY OF BUILDINGS

SO NANO, BIO AND GREEN - TECHNOLOGIES FOR A SUSTAINABLE FUTURE, VOL II

(SGEM 2015)

SE International Multidisciplinary Scientific GeoConference-SGEM

LA English

DT Proceedings Paper

CT 15th International Multidisciplinary Scientific Geoconference (SGEM)

CY JUN 18-24, 2015

CL Albena, BULGARIA

SP Bulgarian Acad Sci, Acad Sci Czech Repub, Latvian Acad Sci, Polish Acad Sci, Russian Acad Sci, Serbian

Acad Sci & Arts, Slovak Acad Sci, Natl Acad Sci Ukraine, Inst Water Problem & Hydropower NAS KR,

Natl Acad Sci Armenia, Sci Council Japan, World Acad Sci, European Acad Sci Arts & Letters, Acad Sci

Moldova, Montenegrin Acad Sci & Arts, Croatian Acad Sci & Arts, Georgian Natl Acad Sci, Acad Fine Arts

& Design Bratislava, Turkish Acad Sci, Bulgarian Ind Assoc, Bulgarian Minist Environ & Water

DE energy efficiency; energy management; green technologies; sustainable buildings; NZEB

AB A significant percentage of the energy used on a national and international level is consumed in buildings, which means there are considerable potential for savings and a corresponding need for responsible behaviour. Careful use of energy and resources represents a technical, economic and ecological challenge as well as being one which is important for survival and sustainable living. The continuous modernization of cities will cause a growth of the global energy use in buildings. Thus, there is a need in optimizing the design process of building in order to reduce de energy consumptions and the environmental impact. The paper will present briefly the assessment of several green technologies used for building services and principles of green design of a building and their impact in the energy management of buildings.

C1 [Moga, Ligia; Moga, Ioan] Univ Cluj Napoca, Fac Civil Engr, Cluj Napoca, Romania.

RP Moga, L (reprint author), Univ Cluj Napoca, Fac Civil Engr, Cluj Napoca, Romania.

RI MOGA, LIGIA/B-8988-2015

OI MOGA, LIGIA/0000-0001-9413-017X

CR Badescu V, 2002, RENEW ENERG, V27, P489, DOI 10.1016/S0960-1481(01)00191-4

Chow T. T., 2012, INT J PHOTOENERGY

[Anonymous], 2008, 156032008 EN

Kurnitski J, 2011, REHVA J MAY, V48, P6

Marszal AJ, 2011, ENERG BUILDINGS, V43, P971, DOI 10.1016/j.enbuild.2010.12.022

[Anonymous], 2006, 0001123 MC

NR 6

TC 0

Z9 0

U1 0

U2 4

PU STEF92 TECHNOLOGY LTD  
 PI SOFIA  
 PA 1 ANDREY LYAPCHEV BLVD, SOFIA, 1797, BULGARIA  
 SN 1314-2704  
 BN 978-619-7105-43-8  
 J9 INT MULTI SCI GEOCO  
 PY 2015  
 BP 303  
 EP 310  
 PG 8  
 WC Construction & Building Technology; Geosciences, Multidisciplinary;  
 Nanoscience & Nanotechnology  
 SC Construction & Building Technology; Geology; Science & Technology -  
 Other Topics  
 GA BE4DX  
 UT WOS:000371602600040  
 DA 2018-05-03  
 ER

PT J  
 AU Ofori-Boadu, AN  
 Shofoluwe, MA  
 Owusu-Manu, DG  
 Holt, GD  
 Edwards, D  
 AF Ofori-Boadu, Andrea N.  
 Shofoluwe, Musibau A.  
 Owusu-Manu, De-Graft  
 Holt, Gary D.  
 Edwards, David

TI Analysis of US commercial buildings' energy efficiency programs  
 SO BUILT ENVIRONMENT PROJECT AND ASSET MANAGEMENT

LA English  
 DT Article

DE USA; Energy efficiency; Commercial buildings; Electricity consumption;  
 Energy programs; Foreign oil

ID STATE-LEVEL; IMPLEMENTATION; ELECTRICITY; INTENSITY; MARKET; POLICY

AB Purpose - The purpose of this paper is to investigate relationships between five energy efficiency programs and electricity intensities in the US commercial buildings sector.

Design/methodology/approach - Regression methods analyze state-level secondary data from 2006 through 2009 to identify significant energy program drivers of electricity efficiency.

Findings - Combined, the five programs studied account for approximately nine percent reduction in commercial electricity intensity.

Practical implications - Outcomes will inform stakeholders' decision-making regarding adoption or continuation of energy programs. Social implications - Electricity efficiency gains will help reduce negative environmental aspects and the present dependence on foreign oil.

Originality/value - Very little research has considered the impact of multiple programs on commercial electricity efficiency within their complex implementation environment.

C1 [Ofori-Boadu, Andrea N.; Shofoluwe, Musibau A.] North Carolina Agr & Tech State Univ, Dept Built Environm, Greensboro, NC USA.

[Owusu-Manu, De-Graft] Kwame Nkrumah Univ Sci & Technol, Kumasi, Ghana.

[Holt, Gary D.] Univ Cent Lancashire, Grenfell Baines Sch Architecture Construct & Envi, Preston PR1 2HE, Lancs, England.

[Edwards, David] Birmingham City Business Sch, Dept Ind Innovat, Birmingham, W Midlands, England.

RP Holt, GD (reprint author), Univ Cent Lancashire, Grenfell Baines Sch Architecture Construct & Envi, Preston PR1 2HE, Lancs, England.

EM gary-holt@outlook.com

OI Holt, Gary/0000-0003-4461-1041

- CR Andrews CJ, 2009, ENER POLICY, V37, P541, DOI 10.1016/j.enpol.2008.09.085
- Arimura T. H., 2011, 0948REV RFF DP
- Aroonruengsawat A, 2009, IMPACT STATE LEVEL B
- Berry D, 2008, ENER POLICY, V36, P3620, DOI 10.1016/j.enpol.2008.06.011
- Bickman L., 2000, NEW DIRECTIONS EVALU, V87, P103, DOI DOI 10.1002/EV.1186
- Blank R. M., 1999, FINANCIAL INCENTIVES
- BRIGGS RS, 2002, CLIMATE CLASSIFICATI
- Chin WW, 2003, INFORM SYST RES, V14, P189, DOI 10.1287/isre.14.2.189.16018
- COHEN J, 1992, PSYCHOL BULL, V112, P155, DOI 10.1037//0033-2909.112.1.155
- Dane AV, 1998, CLIN PSYCHOL REV, V18, P23, DOI 10.1016/S0272-7358(97)00043-3
- Domitrovich CE, 2000, J EDUC PSYCHOL CONS, V11, P193, DOI 10.1207/S1532768XJEP1102\_04
- Doris E., 2009, NRELTP6A246532
- Dough, 2006, INTRO PANEL DATA MOD
- Durlak J. A, 1998, J PREVENTION INTERVE, V17, P5, DOI DOI 10.1300/J005V17N02\_02
- Durlak JA, 2008, AM J COMMUN PSYCHOL, V41, P327, DOI 10.1007/s10464-008-9165-0
- Durlak JA, 2010, EARLY CHILD RES Q, V25, P348, DOI 10.1016/j.ecresq.2010.03.003
- Geller H, 2005, EXPERIENCE ENERGY EF
- Gillingham K, 2004, 0419 RES FUT
- Greenzone, 2012, ASHRAE CLIM ZON MAP
- Horowitz MJ, 2004, ENERGY J, V25, P115
- Inhaber H., 1997, WHY ENERGY CONSERVAT
- International Code Council, 2009, 2009 INT EN CONS COD
- [Anonymous], 2008, EN EFF REQ BUILD COD
- JAFFE AB, 1994, ENERGY J, V15, P43
- Joyashree R., 2000, ENER POLICY, V28, P433
- Lee CC, 2010, ENER J, V31, P1
- Lee WL, 2004, PROG ENER COMBUST, V30, P477, DOI 10.1016/j.peccs.2004.03.002
- LEVINE MD, 1995, ANNU REV ENER ENV, V20, P535
- Linton JD, 2002, TECHNOVATION, V22, P65, DOI 10.1016/S0166-4972(01)00075-X
- Mathieson K., 2001, Data Base for Advances in Information Systems, V32, P86
- Matland R.E., 1995, J PUBL ADM RES THEOR, V5, P145
- Metcalf GE, 2008, ENER J, V29, P1
- Molina M., 2010, E107 AM COUNC EN EFF
- NASEO, 2008, NASEOS SEP ACT WINT
- Ofori-Boadu A. N., 2013, INT J ENG RES INNOVA, V5, P76
- Pardoe I., 2006, APPL REGRESSION MODE
- Petrocelli JV, 2003, MEAS EVAL COUNS DEV, V36, P9
- Prindle W., 2003, ENERGY EFFICIENCY N
- Scheirer M. A., 1987, NEW DIRECTIONS PROGR, V1987, P59
- Schweitzer M., 2005, ORNLCON492
- Sebold F. D., 1985, ENERGY J, V6, P73, DOI DOI 10.5547/ISSN0195-6574-EJ-V016-N02-6
- Shaw C. A., 2009, THESIS GEORGETOWN U
- Straub D., 2008, TESTING DIFFERENCES
- Sutherland R. J., 2003, HIGH COSTS FEDERAL E
- Tonn B, 2007, ENER POLICY, V35, P3665, DOI 10.1016/j.enpol.2007.01.009
- U. S. Department of Energy, 2009, BUILD EN DAT BOOK
- [Anonymous], 2012, 2011 BUILD EN DAT BO
- US Department of Energy-Energy Efficiency and Renewable Energy, 2010, MULT PROGR PLAN BUIL
- US Energy Information Administration, 2006, 2003 COMM BUILD EN C
- US Energy Information Administration, 2012, AEO2012 EARL REV OV
- US Energy Information Administration, 2011, DOEIEA02142009
- US Energy Information Administration, 2011, GLOSSARY
- US Energy Information Administration, 2009, RECS METH
- US Energy Information Administration, 2010, EL AN PROJ EL SAL RE
- US Energy Information Administration, 2012, ANN EN REV 2011
- Weiss CH, 1972, EVALUATION RES METHO
- Wolman G., 1981, J PUBLIC POLICY, V1, P433

TC 0

Z9 0

U1 0

U2 1

PU EMERALD GROUP PUBLISHING LIMITED

PI BINGLEY

PA HOWARD HOUSE, WAGON LANE, BINGLEY BD16 1WA, W YORKSHIRE, ENGLAND

SN 2044-124X

EI 2044-1258

J9 BUILT ENVIRON PROJ A

J1 Built Environ. Proj. Asset Manag.

PY 2015

VL 5

IS 4

BP 349

EP 362

DI 10.1108/BEPAM-03-2014-0015

PG 14

WC Engineering, Civil

SC Engineering

GA CQ4HI

UT WOS:000360565000002

DA 2018-05-03

ER

PT B

AU Stratogiannis, G

Vlachostergiou, A

Siolas, G

Caridakis, G

Mylonas, P

Stafylopatis, A

Kollias, S

AF Stratogiannis, Georgios

Vlachostergiou, Aggeliki

Siolas, Georgios

Caridakis, George

Mylonas, Phivos

Stafylopatis, Andreas

Kollias, Stefanos

GP IEEE

TI User and home appliances pervasive interaction in a sensor driven Smart

Home environment: the SandS approach

SO 10TH INTERNATIONAL WORKSHOP ON SEMANTIC AND SOCIAL MEDIA ADAPTATION AND  
PERSONALIZATION SMAP 2015

LA English

DT Proceedings Paper

CT 10th International Workshop on Semantic and Social Media Adaptation and

Personalization (SMAP)

CY NOV 05-06, 2015

CL Trento, ITALY

SP IEEE Comp Soc, IEEE Computat Intelligence Soc, Univ Trento, Univ Peloponnese

DE Pervasive Computing; Smart Homes; Sensors; Context Awareness; Semantic

Interoperability; Smart Cities

ID CONTEXT

AB EU FIRE research project "Social and Smart" aims to formalize and build a complete ecosystem of users, context sensors and smart home appliances that interact following the ubiquitous computing paradigm in order to adapt and enhance the everyday user-appliance interaction. In this framework a user is modeled

through the use of Personas stereotypes. Contextual information is collected via wireless ambient sensors, such as temperature and humidity ones, but can also include Smart City sensors and services. This contextual information is further related to each user's model through the enforcement of home rules, expressed in a high level language. Knowledge representation is supported through Semantic Web technologies that also ensure the interoperability between all the actors of the ecosystem. Preliminary experimental results have been carried in a small scale Smart Home setting, but also in a larger scale using the FIWARE(1) framework provided by the SmartSandander testbed.

C1 [Stratogiannis, Georgios; Vlachostergiou, Aggeliki; Siolas, Georgios; Caridakis, George; Mylonas, Phivos; Stafylopatis, Andreas; Kollias, Stefanos] Natl Tech Univ Athens, Intelligent Syst Content & Interact Lab, Iroon Polytexneiou 9, Zografos 15780, Greece.

[Caridakis, George] Univ Aegean, Dept Cultural Technol & Commun, Mitilini 81100, Lesvos, Greece.

[Mylonas, Phivos] Ionian Univ, Dept Informat, Corfu 49100, Greece.

RP Stratogiannis, G (reprint author), Natl Tech Univ Athens, Intelligent Syst Content & Interact Lab, Iroon Polytexneiou 9, Zografos 15780, Greece.

EM stratogian@islab.ntua.gr; aggelikivl@image.ntua.gr;

gsiolas@islab.ntua.gr; gcari@image.ntua.gr; fmylonas@image.ntua.gr

CR Abowd GD, 1999, LECT NOTES COMPUT SC, V1707, P304

Alam MR, 2012, IEEE T SYST MAN CY C, V42, P1190, DOI 10.1109/TSMCC.2012.2189204

Alti A., 2013, 5 INT C WEB INF TECH, P531

Atzori L, 2012, COMPUT NETW, V56, P3594, DOI 10.1016/j.comnet.2012.07.010

Bock R, 2013, INT CONF AFFECT, P803, DOI 10.1109/ACIL.2013.150

Castillejo E, 2014, SENSORS-BASEL, V14, P5354, DOI 10.3390/s140305354

Chan M., 2014, P 7 INT C PERVASIVE, P51

Duric Z, 2002, P IEEE, V90, P1272, DOI 10.1109/JPROC.2002.801449

Evers Christoph, 2012, Ubiquitous Computing and Ambient Intelligence. 6th International Conference, UCAmI 2012. Proceedings, P200, DOI 10.1007/978-3-642-35377-2\_28

GREGOR P, 2002, P 5 INT ACM C ASS TE, P151

Gu T., 2004, P COMM NETW DISTR SY, P270

Hammal Z., 2014, P WORKSH ROADM FUT M, P19, DOI 10.1145/2666253.2666258

Heckmann D., 2007, CONTEXTS ONTOLOGIES, P42

Henricksen K., 2002, Pervasive Computing. First International Conference, Pervasive 2002. Proceedings (Lecture Notes in Computer Science Vol.2414), P167

Horrocks I, 2004, W3C MEMBER SUBMISSIO, V21, P79

Laborie S, 2012, 2012 SEVENTH INTERNATIONAL WORKSHOP ON SEMANTIC AND SOCIAL MEDIA ADAPTATION AND PERSONALIZATION (SMAP 2012), P121, DOI 10.1109/SMAP.2012.12

Soegaard Rikke Friis, 2013, ENCY HUMAN COMPUTER

Parsia B, 2004, 3 INT SEM WEB C, V18

Ryan N. S., 1998, BRIT ARCHAEOLOGICAL, P182

Schilit B., 1994, P WORKSH MOB COMP SY, P85, DOI DOI 10.1109/WMCSA.1994.16

Siolas G., 2013, 8 INT WORKSH SEM SOC, P12

Sohn M, 2014, SOFT COMPUT, V18, P1715, DOI 10.1007/s00500-014-1288-7

NR 22

TC 0

Z9 0

U1 0

U2 1

PU IEEE

PI NEW YORK

PA 345 E 47TH ST, NEW YORK, NY 10017 USA

BN 978-1-4673-8395-0

PY 2015

BP 34

EP 39

PG 6

WC Computer Science, Theory & Methods; Engineering, Electrical & Electronic

SC Computer Science; Engineering

GA BF0HK

UT WOS:000378859500007

DA 2018-05-03  
ER

PT B

AU Sugarman, V  
Lank, E

AF Sugarman, Valerie  
Lank, Edward

GP Assoc Comp Machinery

TI Designing Persuasive Technology to Manage Peak Electricity Demand in  
Ontario Homes

SO CHI 2015: PROCEEDINGS OF THE 33RD ANNUAL CHI CONFERENCE ON HUMAN FACTORS  
IN COMPUTING SYSTEMS

LA English

DT Proceedings Paper

CT 33rd Annual CHI Conference on Human Factors in Computing Systems (CHI)

CY APR 18-23, 2015

CL Seoul, SOUTH KOREA

SP Assoc Comp Machinery, Assoc Comp Machinery Special Interest Grp Comp Human Interact

DE Sustainability; Peak Electricity Load; Persuasive Technology; Design

AB When it comes to environmental sustainability, the time that electricity is consumed matters. For example, using an air conditioner on a hot summer afternoon as the power grid is strained necessitates the use of more polluting sources to meet demand. In this paper, we analyze end-user response to two utility-driven conservation programs in Ontario, Canada: Time-of-Use pricing and the peaksaver program. We find that time-of-use pricing encourages shifting some electricity demand, but only when it is convenient. We also find that while potentially effective at a larger scale, the peaksaver program in its current form is unattractive to participants. These results are discussed in the context of Fogg's Behavior Model for Persuasive Design, which allows us to explore the design space for improvement to these programs and ground our design implications for the design of technologies to encourage reduction of peak electricity demand.

C1 [Sugarman, Valerie; Lank, Edward] Univ Waterloo, Cheriton Sch Comp Sci, Waterloo, ON, Canada.

RP Sugarman, V (reprint author), Univ Waterloo, Cheriton Sch Comp Sci, Waterloo, ON, Canada.

EM vsugarman@uwaterloo.ca; lank@uwaterloo.ca

FU Natural Science and Engineering Research Council of Canada (NSERC);  
Networks of Centres of Excellence for Graphics, Animation and New Media  
(NCE-GRAND)

FX Funding provided by the Natural Science and Engineering Research Council  
of Canada (NSERC) and the Networks of Centres of Excellence for  
Graphics, Animation and New Media (NCE-GRAND).

CR Adepetu A., 2013, IEEE SMARTGRIDCOMM S

Boucher A., 2012, P DIS 12, P612

Brynjarsdottir H., 2012, P CHI 12

Clear A.K., 2013, P SIGCHI C HUM FACT, P2447

Consolvo S, 2008, CHI 2008: 26TH ANNUAL CHI CONFERENCE ON HUMAN FACTORS IN  
COMPUTING SYSTEMS VOLS 1 AND 2, CONFERENCE PROCEEDINGS, P1797

Consolvo S, 2009, CHI2009: PROCEEDINGS OF THE 27TH ANNUAL CHI CONFERENCE ON HUMAN  
FACTORS IN COMPUTING SYSTEMS, VOLS 1-4, P405

Costanza E., 2014, P CHI 14

Darby S, 2006, EFFECTIVENESS FEEDBA

Fogg B., 2009, P PERS TECHN 2009 AC, V40:1-40:7, DOI DOI 10.1145/1541948.1541999

Fogg B. J., 2007, GRAPHIC ILLUSTRATION

Fogg B. J., 2002, UBIQUITY, V2002, P5, DOI DOI 10.1145/764008.763957

Froehlich J, 2010, CHI2010: PROCEEDINGS OF THE 28TH ANNUAL CHI CONFERENCE ON HUMAN  
FACTORS IN COMPUTING SYSTEMS, VOLS 1-4, P1999

Greenberg S, 2008, CHI 2008: 26TH ANNUAL CHI CONFERENCE ON HUMAN FACTORS IN  
COMPUTING SYSTEMS VOLS 1 AND 2, CONFERENCE PROCEEDINGS, P111

Haakansson M., 2014, P DIS 14



He HA, 2010, CHI2010: PROCEEDINGS OF THE 28TH ANNUAL CHI CONFERENCE ON HUMAN FACTORS IN COMPUTING SYSTEMS, VOLS 1-4, P927

Eric B.Hekler, 2013, P SIGCHI C HUM FACT, P3307, DOI DOI 10.1145/2470654.2466452

HydroOne, 2003, EL DEM ONT

Katzeff C, 2015, ADV INTELL SYST, V310, P351, DOI 10.1007/978-3-319-09228-7\_21

Knowles Bran, 2013, P 2013 ACM INT JOINT, P305

Knowles B., 2014, P DIS 14

Koehler C., 2013, P UBICOMP 13

LEPPER MR, 1973, J PERS SOC PSYCHOL, V28, P129, DOI 10.1037/h0035519

Meier A., 2012, PEOPLE ACTUALLY USE

Ontario Energy Board, 2014, BACKGR MAY 1 EL PRIC

Pierce James, 2012, P SIGCHI C HUM FACT, P665, DOI DOI 10.1145/2207676.2207771

Pierce J., 2010, P CHI 10

Rodden Tom A, 2013, P SIGCHI C HUM FACT, P1173, DOI DOI 10.1145/2470654.2466152

Rowlands IH, 2011, ENERG EFFIC, V4, P571, DOI 10.1007/s12053-011-9113-y

Rowlands I. H., 2008, DEMAND RESPONSE ONTA

Singla S, 2012, INT CONF SMART GRID, P103, DOI 10.1109/SmartGridComm.2012.6485967

Strapp J., 2007, ONTARIO SMART PRICE

Strengers Y., 2013, SMART ENERGY TECHNOL

Strengers Y., 2008, P OZCHI 08

Yang R., 2014, PROC CHI, V2014, P823

NR 34

TC 0

Z9 0

U1 0

U2 0

PU ASSOC COMPUTING MACHINERY

PI NEW YORK

PA 1515 BROADWAY, NEW YORK, NY 10036-9998 USA

BN 978-1-4503-3145-6

PY 2015

BP 1975

EP 1984

DI 10.1145/2702123.2702364

PG 10

WC Computer Science, Cybernetics; Computer Science, Information Systems;  
 Computer Science, Interdisciplinary Applications; Computer Science,  
 Theory & Methods

SC Computer Science

GA BI5GT

UT WOS:000412395502001

DA 2018-05-03

ER

PT B

AU Tan, XL  
 Guan, CS  
 Lu, YW  
 Liu, AD  
 Xiang, C

AF Tan Xianliang  
 Guan Changsheng  
 Lu Yiwei  
 Liu Aidong  
 Xiang Chao

GP Destech Publicat Inc

TI The Application Research of BIM Technology in Energy Efficiency  
 Evaluation About High-rise Building

SO 2015 4TH INTERNATIONAL CONFERENCE ON ENERGY AND ENVIRONMENTAL PROTECTION  
(ICEEP 2015)

LA English

DT Proceedings Paper

CT 4th International Conference on Energy and Environmental Protection  
(ICEEP)

CY JUN 02-04, 2015

CL Shenzhen, PEOPLES R CHINA

DE BIM; energy efficiency evaluation; analysis of solar radiation; building  
energy consumption

AB This paper studies the method of BIM technology application in the field of building energy efficiency by combining BIM technology and building energy consumption analysis. Through establish the building information model to integrate and manage the building information such as the function of architectural space geometry information, space information, building materials and equipment established by a building information model. This information can provide necessary basis for the green building design and energy efficiency evaluation. Based on the model of information and data format conversion, we can use professional tools to analysis the building energy efficiency and then according to the analysis results to adjust design, achieve the goal of building energy efficiency design.

C1 [Tan Xianliang; Guan Changsheng; Lu Yiwei; Liu Aidong; Xiang Chao] Wuhan Univ Technol, Wuhan 430070, Hubei, Peoples R China.

[Tan Xianliang] Hunan City Univ, Yiyang, Hunan, Peoples R China.

RP Tan, XL (reprint author), Wuhan Univ Technol, Wuhan 430070, Hubei, Peoples R China.

EM cysjy@vip.163.com; guanacs2008@126.com; 46151218@qq.com

CR Baldwin R., 1990, BUILDING RES ESTABLI

mu Bo, 2011, AUTODESK ECOTECH ANA, V3

Cole RJ, 2000, GBC2000 ASSESSMENT M, V1

Guan C., 2013, J GREEN SCI TECHNOLO, P242

Li Jing, 2012, BUILDING EC, P96

OUYANG Sheng-chun, 2008, BUILDING SCI, V24

Qiu qiang, 2012, ENV PROTECTION CIRCU

QIU Xiang-wu, 2012, BUILDING SCI, V28

U.S. Green Building Council, 2007, LEED HOM PROGR PIL R

ZENG Xu-dong, 2008, J CHONGQING JIANZHU, V28

Zhang Lei, 2011, J INFORM TECHNOLOGY, V3

NR 11

TC 0

Z9 0

U1 2

U2 5

PU DESTTECH PUBLICATIONS, INC

PI LANCASTER

PA 439 DUKE STREET, LANCASTER, PA 17602-4967 USA

BN 978-1-60595-264-2

PY 2015

BP 696

EP 701

PG 6

WC Energy & Fuels; Engineering, Environmental

SC Energy & Fuels; Engineering

GA BE7MH

UT WOS:000375561900127

DA 2018-05-03

ER

PT S

AU Wu, W

Li, WJ

Law, DF

Na, WK  
 AF Wu, Wei  
 Li, Wenjia  
 Law, Deify  
 Na, Woonki  
 BE Chong, WO  
 Chang, J  
 Parrish, K  
 Berardi, U

TI Improving data center energy efficiency using a cyber-physical systems approach: integration of building information modeling and wireless sensor networks

SO DEFINING THE FUTURE OF SUSTAINABILITY AND RESILIENCE IN DESIGN, ENGINEERING AND CONSTRUCTION

SE Procedia Engineering

LA English

DT Proceedings Paper

CT Defining the Future of Sustainability and Resilience in Design, Engineering and Construction

CY MAY 10-13, 2015

CL Chicago, CA

SP ASCE, ICSDEC

DE Data center; energy efficiency; building information modeling; wireless sensor network; cyber-physical systems

ID CONSUMPTION

AB The increase in data center operating costs is driving innovation to improve their energy efficiency.

Previous research has investigated computational and physical control intervention strategies to alleviate the competition between energy consumption and thermal performance in data center operation. This study contributes to the body of knowledge by proposing a cyber-physical systems (CPS) approach to innovatively integrate building information modeling (BIM) and wireless sensor networks (WSN). In the proposed framework, wireless sensors are deployed strategically to monitor thermal performance parameters in response to runtime server load distribution. Sensor data are collected and contextualized in reference to the building information model that captures the geometric and functional characteristics of the data center, which will be used as inputs of continuous simulations aiming to predict real-time thermal performance of server working environment. Comparing the simulation results against historical performance data via machine learning and data mining, facility managers can quickly pinpoint thermal hot zones and actuate intervention procedures to improve energy efficiency. This BIM-WSN integration also facilitates smarter power management by capping runtime power demand within peak power capacity of data centers and alerting power outage emergencies. This paper lays out the BIM-WSN integration framework, explains the working mechanism, and discusses the feasibility of implementation in future work. (C) 2015 The Authors. Published by Elsevier Ltd. This is an open access article under the CC BY-NC-ND license.

C1 [Wu, Wei; Law, Deify; Na, Woonki] Calif State Univ Fresno, 5241 N Maple Ave, Fresno, CA 93740 USA.

[Li, Wenjia] New York Inst Technol, New York, NY 10023 USA.

RP Wu, W (reprint author), Calif State Univ Fresno, 5241 N Maple Ave, Fresno, CA 93740 USA.

EM weiwu@csufresno.edu

CR Ahmed A, 2011, ADV ENG INFORM, V25, P341, DOI 10.1016/j.aei.2010.10.002

Aksanli B, 2013, I S MOD ANAL SIM COM, P242, DOI 10.1109/MASCOTS.2013.32

Alahmad M, 2010, IECON 2010 - 36th Annual Conference of IEEE Industrial Electronics, P2454, DOI 10.1109/IECON.2010.5675385

Arslan M., 2014, ITCON, V19, P72

Banerjee A., 2011, ISABEL 11, P154

Bazemore B., 2014, 52 ANN ACM SE C ACM

Chen G., 2008, P 5 USENIX S NETW SY, V8, P337

Deng N., 2011, INT S SUST SYST TECH, P1

Dong B, 2005, ENER G BUILDINGS, V37, P545, DOI 10.1016/j.enbuild.2004.09.009

Edwards RE, 2012, ENER G BUILDINGS, V49, P591, DOI 10.1016/j.enbuild.2012.03.010

Environmental Protection Agency (EPA), 2007, REP C SERV DAT CTR E

Gao Y., 2010, SEDM, P434  
 General Service Administration (GSA), 2008, QUICK START GUID INC  
 Guinard A., 2009, P 1 ACM WORKSH EMB S, P25  
 Kensek KM, 2014, INF CONSTR, V66, DOI 10.3989/ic.13.151  
 Kim H, 2011, AUTOMAT CONSTR, V20, P37, DOI 10.1016/j.autcon.2010.07.006  
 Kontorinis V, 2012, CONF PROC INT SYMP C, P488, DOI 10.1109/ISCA.2012.6237042  
 Koomey J., 2011, GROWTH DATA CTR ELEC  
 Li Q, 2009, APPL ENERG, V86, P2249, DOI 10.1016/j.apenergy.2008.11.035  
 Lien C.H., 2004, 12 ICON 04, P253  
 Mamidi S., 2012, AAMAS 12, P45  
 Mastroleon L., 2005, GLOBECOM, P5  
 Moore J., 2005, ATEC 05, P61  
 Osterlind F, 2007, IEEE INT C EMERG, P1376  
 Parolini L., 2008 C POW AW COMP S, P14  
 Patel C.D., 2002, 8 INT C THERM THERM, P767  
 Ricciardi S., 2011, CCP 11, P265, DOI DOI 10.1109/CCP.2011.9  
 SAFAVIAN SR, 1991, IEEE T SYST MAN CYB, V21, P660, DOI 10.1109/21.97458  
 Salomonsson D., 2006, IEEE 37 POW EL SPEC, P1  
 Scheihing P., 2009, DOE DATA CTR ENERGY  
 Schmidt R., 2010, J ELECT PACKAGING T, V132  
 Tang Q., 2012, ACM T EMBED COMPUT S, V11, P1  
 Tang QH, 2006, FOURTH INTERNATIONAL CONFERENCE ON INTELLIGENT SENSING AND INFORMATION PROCESSING, PROCEEDINGS, P203  
 VanGilder JW, 2003, ADVANCES IN ELECTRONIC PACKAGING 2003, VOL 1, P377

NR 34

TC 0

Z9 0

U1 2

U2 14

PU ELSEVIER SCIENCE BV

PI AMSTERDAM

PA SARA BURGERHARTSTRAAT 25, PO BOX 211, 1000 AE AMSTERDAM, NETHERLANDS

SN 1877-7058

J9 PROCEDIA ENGINEER

PY 2015

VL 118

BP 1266

EP 1273

DI 10.1016/j.proeng.2015.08.481

PG 8

WC GREEN & SUSTAINABLE SCIENCE & TECHNOLOGY; Engineering, Multidisciplinary

SC Science & Technology - Other Topics; Engineering

GA BF1RN

UT WOS:000380430700148

OA gold

DA 2018-05-03

ER

PT S

AU Yu, C

Pan, W

Zhao, YS

Li, YG

AF Yu, Cong

Pan, Wei

Zhao, Yisong

Li, Yuguo

BE Sun, Y

Pei, J

TI Challenges for Modeling Energy Use in High-rise Office Buildings in Hong

Kong

SO 9TH INTERNATIONAL SYMPOSIUM ON HEATING, VENTILATION AND AIR CONDITIONING

(ISHVAC) JOINT WITH THE 3RD INTERNATIONAL CONFERENCE ON BUILDING ENERGY

AND ENVIRONMENT (COBEE)

SE Procedia Engineering

LA English

DT Proceedings Paper

CT 9th International Symposium on Heating Ventilation and Air Conditioning

ISHVAC Joint with the 3rd International Conference on Building Energy

and Environment COBEE

CY JUL 12-15, 2015

CL Tianjin, PEOPLES R CHINA

DE High-rise; Office building; Energy modeling; Energy use

ID PERFORMANCE; DESIGN

AB Modeling buildings' energy use is an effective strategy for identifying energy saving potential and seeking for energy efficient building solutions. However, there exist significant challenges for such modeling, particularly of high-rise buildings. The aim of this paper is to examine such challenges drawing on the case of high-density high-rise office buildings in the hot and humid climate of Hong Kong. The challenges are examined in relation to four aspects, namely, modeling approach, modelling tools, data availability and atmospheric conditions. A framework of strategies is developed for addressing the challenges. The strategies are then illustrated through a case study with a hypothesized high-rise office building in Hong Kong. Essential to achieving accuracy of modeling buildings' energy use are found to be the collection and verification of building information and specification of thermal zones and schedules for modeling. The lack of usable data of energy use in high-rise buildings is considered to be a major barrier to verifying modeled results. To establish an integrated model with energy modelling and CFD software should effectively address the challenges. (C) 2015 The Authors. Published by Elsevier Ltd.

C1 [Yu, Cong; Pan, Wei; Zhao, Yisong] Univ Hong Kong, Dept Civil Engr, Hong Kong, Hong Kong, Peoples R China.

[Li, Yuguo] Univ Hong Kong, Dept Mech Engr, Hong Kong, Hong Kong, Peoples R China.

RP Pan, W (reprint author), Univ Hong Kong, Dept Civil Engr, Hong Kong, Hong Kong, Peoples R China.

EM wpan@hku.hk

OI Li, Yuguo/0000-0002-2281-4529

CR Buildings Department, 1996, MONTHL DIG 1975 1995

Eskin N, 2008, ENERGBUILDINGS, V40, P763, DOI 10.1016/j.enbuild.2007.05.008

[Anonymous], 2014, WORLD POP DAT SHEET

Housing Department, 2003, HONG KONG SAR GOV

Kofoworola OF, 2009, ENERGBUILDINGS, V41, P1076, DOI 10.1016/j.enbuild.2009.06.002

Lam JC, 2003, BUILD ENVIRON, V38, P493, DOI 10.1016/S0360-1323(02)00132-4

Lam JC, 1996, BUILD ENVIRON, V31, P27, DOI 10.1016/0360-1323(95)00031-3

Langner MR, 2012, J BUILD PERFORM SIMU, V5, P313, DOI 10.1080/19401493.2011.590607

Li DHW, 2008, BUILD ENVIRON, V43, P1446, DOI 10.1016/j.buildenv.2007.07.002

Niu JL, 2004, ENERGBUILDINGS, V36, P1259, DOI 10.1016/j.enbuild.2003.07.005

Pan YQ, 2007, ENERGBUILDINGS, V39, P651, DOI 10.1016/j.enbuild.2006.09.013

Pasquay T, 2004, ENERGBUILDINGS, V36, P381, DOI 10.1016/j.enbuild.2004.01.018

Population Reference Bureau (PRB), 2012, WORLD POP DAT SHEET

Rating & Valuation Department, 2000, HONG KONG PROP REV 2

WONG NH, 2005, ENERGBUILDINGS, V37, P563

Yu PCH, 2007, ENERGY, V32, P83, DOI 10.1016/j.energy.2006.03.019

Zhang S., 2014, INT J ENERGY SECTOR, V8, P456

NR 17

TC 0

Z9 0

U1 0

U2 4

PU ELSEVIER SCIENCE BV

PI AMSTERDAM

PA SARA BURGERHARTSTRAAT 25, PO BOX 211, 1000 AE AMSTERDAM, NETHERLANDS  
 SN 1877-7058  
 J9 PROCEDIA ENGINEER  
 PY 2015  
 VL 121  
 BP 513  
 EP 520  
 DI 10.1016/j.proeng.2015.08.1100  
 PG 8  
 WC Construction & Building Technology; Engineering, Multidisciplinary  
 SC Construction & Building Technology; Engineering  
 GA BF2TP  
 UT WOS:000380499000071  
 OA gold  
 DA 2018-05-03  
 ER

PT S

AU Yuan, ZF

AF Yuan, Zhifen

BE Liang, Z

Li, X

TI Research on Decision Model of Building Energy Efficiency

SO PROCEEDINGS OF THE 4TH INTERNATIONAL CONFERENCE ON MECHATRONICS,  
 MATERIALS, CHEMISTRY AND COMPUTER ENGINEERING 2015 (ICMMCCE 2015)

SE ACSR-Advances in Computer Science Research

LA English

DT Proceedings Paper

CT 4th International Conference on Mechatronics, Materials, Chemistry and  
 Computer Engineering (ICMMCCE)

CY DEC 12-13, 2015

CL Xian, PEOPLES R CHINA

DE Existing building energy efficiency retrofitting (EBEER); Decision  
 model; Uncertainty; Multi-objective optimization

AB Following the overall building energy-saving situation in China and reflecting the rationality and flexibility, the paper aims to investigate the decision methods of existing building energy efficiency retrofitting (EBEER) projects under uncertainty to facilitate comprehensive and objective assessment in such projects. In this paper, the internal and external uncertainties affecting energy efficiency are identified and their random fluctuation characteristics are qualified and introduced into the analysis of decisions. By taking into account life-cycle costs, energy savings, carbon emission and thermal comfort, a project revenue optimization model under uncertainty is established to explore the dynamic quantitative relationship between energy-saving technology solutions and the costs and benefits over a long horizon for EBEER projects. By means of optimizing analysis, the multi-stage optimal scales and energy-saving technology solutions for EBEER projects are achieved. This paper will provide a new perspective for solving EBEER projects' and financing fatigue to contribute to the returns and the smooth implementation of EBEER projects in China.

C1 [Yuan, Zhifen] Yuyang Teachers Coll, Dept Comp & Sci, Shiyang 442000, Peoples R China.

RP Yuan, ZF (reprint author), Yuyang Teachers Coll, Dept Comp & Sci, Shiyang 442000, Peoples R China.

EM 464547@qq.com

CR Chidiac SE, 2011, ENERG BUILDINGS, V43, P614, DOI 10.1016/j.enbuild.2010.11.002

Ibn-Mohammed T, 2014, BUILD ENVIRON, V72, P82, DOI 10.1016/j.buildenv.2013.10.018

Kumaroglu G, 2012, ENERG BUILDINGS, V49, P327, DOI 10.1016/j.enbuild.2012.02.022

Liu C, 2006, P 2006 INT C MAN SCI, P15

Menassa CC, 2011, ENERG BUILDINGS, V43, P3576, DOI 10.1016/j.enbuild.2011.09.030

Ouyang JL, 2011, ENERG POLICY, V39, P4902, DOI 10.1016/j.enpol.2011.06.025

NR 6

TC 0

Z9 0

U1 0  
 U2 0  
 PU ATLANTIS PRESS  
 PI PARIS  
 PA 29 AVENUE LAVMIERE, PARIS, 75019, FRANCE  
 SN 2352-538X  
 BN 978-94-6252-133-9  
 J9 ACSR ADV COMPUT  
 PY 2015  
 VL 39  
 BP 250  
 EP 253  
 PG 4  
 WC Engineering, Electrical & Electronic; Engineering, Mechanical; Materials  
 Science, Multidisciplinary  
 SC Engineering; Materials Science  
 GA BE5OR  
 UT WOS:000373157300051  
 DA 2018-05-03  
 ER

PT S  
 AU Zhang, L  
 Chang, TY  
 Cui, HL  
 Tian, XZ  
 Wang, ZM  
 AF Zhang Lin  
 Chang Tianying  
 Cui Hongliang  
 Tian Xianzhong  
 Wang Zhongmin

GP IEEE  
 TI Multi-agent System Design for Energy Saving in Intelligent Building  
 SO 2015 8TH INTERNATIONAL SYMPOSIUM ON COMPUTATIONAL INTELLIGENCE AND  
 DESIGN (ISCID), VOL 1  
 SE International Symposium on Computational Intelligence and Design  
 LA English  
 DT Proceedings Paper  
 CT 8th International Symposium on Computational Intelligence and Design  
 (ISCID)  
 CY DEC 12-13, 2015  
 CL Hangzhou, PEOPLES R CHINA  
 SP IEEE Nanjing Computat Intelligence Chapter, Univ Bristol, Zhejiang Univ, Zhejiang Sci Tech Univ,  
 Zhejiang Univ, Coll Comp Sci, IEEE Comp Soc  
 DE multi-agent system; intelligent buildings; wireless sensor network;  
 energy saving  
 AB With the rapid development of artificial intelligence, intelligent agent techniques have provided a new  
 way for intelligent buildings to a higher level. Although the multi- agentsystem application in intelligent  
 buildings, especially for energysaving application is just in its initial stage, it has drawn more and more  
 attention. With the advance of agent technology, wireless sensor network and open standards in building  
 automation systems, it is now feasible to build an intelligent multi- agent system for energy conservation.  
 In this paper, we present a building control system architecture based on multiagent and the way to realize  
 energy efficiency without compromising occupants' comfort.  
 C1 [Zhang Lin; Chang Tianying; Cui Hongliang; Tian Xianzhong; Wang Zhongmin] Shandong Acad Sci,  
 Automat Inst, Ultrawideband & Terahertz Dept, Jinan, Peoples R China.  
 RP Chang, TY (reprint author), Shandong Acad Sci, Automat Inst, Ultrawideband & Terahertz Dept, Jinan,  
 Peoples R China.

EM zhanglin987326@126.com; tchang2013@163.com; hlcui2012@126.com;  
xztian5@163.com; lifenet@yeah.net

FU Independent innovation and achievements transformation special in  
shandong province [2014CGZH1104]; Shandong academy of sciences, the  
guide of science and technology

FX This work is part of Independent innovation and achievements  
transformation special in shandong province (2014CGZH1104); Shandong  
academy of sciences, the guide of science and technology under special  
funding. The authors would like to thank our fund provider.

CR Davidsson P, 2005, INFORM SCIENCES, V171, P293, DOI 10.1016/j.ins.2004.09.007  
Davidsson P, 2000, FOURTH INTERNATIONAL CONFERENCE ON MULTIAGENT SYSTEMS,  
PROCEEDINGS, P377, DOI 10.1109/ICMAS.2000.858483

Davidsson P., 1998, DA DSM EUROPE DISTRI

Feldmann S., 2003, INT C WIR NETW

Li Su-ling, 2008, INT C INT COMP TECHN

Qiao K.L. Bing, 2006, INT C INT AG TECHN

Wang Da-peng, 2007, WATER SUPPLY DRAINAG, P24

Wright JA, 2002, ENERG BUILDINGS, V34, P959, DOI 10.1016/S0378-7788(02)00071-3

ZHANG Feng, 2006, J NANJING FORESTRY U

ZHANG Xihu, 2001, MACHINE ELECT

NR 10

TC 0

Z9 0

U1 2

U2 3

PU IEEE

PI NEW YORK

PA 345 E 47TH ST, NEW YORK, NY 10017 USA

SN 2165-1701

BN 978-1-4673-9587-8

J9 INT SYM COMPUT INTEL

PY 2015

BP 297

EP 300

DI 10.1109/ISCID.2015.168

PG 4

WC Computer Science, Artificial Intelligence; Engineering, Electrical &  
Electronic

SC Computer Science; Engineering

GA BH2FU

UT WOS:000398912400071

DA 2018-05-03

ER

PT S

AU Zhao, SG

Feng, W

Zhang, SC

Hou, J

Zhou, N

Levine, M

AF Zhao, Shanguo

Feng, Wei

Zhang, Shicong

Hou, Jing

Zhou, Nan

Levine, Mark

BE Sun, Y



Pei, J

TI Energy Savings and Cost-benefit Analysis of the New Commercial Building  
Standard in China

SO 9TH INTERNATIONAL SYMPOSIUM ON HEATING, VENTILATION AND AIR CONDITIONING  
(ISHVAC) JOINT WITH THE 3RD INTERNATIONAL CONFERENCE ON BUILDING ENERGY  
AND ENVIRONMENT (COBEE)

SE Procedia Engineering

LA English

DT Proceedings Paper

CT 9th International Symposium on Heating Ventilation and Air Conditioning  
ISHVAC Joint with the 3rd International Conference on Building Energy  
and Environment COBEE

CY JUL 12-15, 2015

CL Tianjin, PEOPLES R CHINA

DE Commercial building; Energy efficiency standard; Reference building;  
Cost-benefit; Simulation

ID CONSUMPTION

AB In this paper, a comprehensive comparison of the commercial building energy efficiency standard  
between the previous 2005 version and the new proposed version is conducted, including the energy  
efficiency analysis and cost-benefit analysis. To better understand the tech-economic performance of the  
new Chinese standard, energy models were set up based on a typical commercial office building in  
Chinese climate zones. The building energy standard in 2005 is used as the baseline for this analysis. Key  
building technologies measures are analyzed individually, including roof, wall, window, lighting and  
chiller and so on and finally whole building cost-benefit analysis was conducted. Results show that the  
new commercial building energy standard demonstrates good cost-effective performance, with whole  
building payback period around 4 years (C) 2015 Published by Elsevier Ltd.

C1 [Zhao, Shanguo; Feng, Wei; Zhou, Nan; Levine, Mark] Lawrence Berkeley Natl Lab, Berkeley, CA 94720  
USA.

[Zhao, Shanguo] SouthEast Univ, Nanjing, Jiangsu, Peoples R China.

[Zhang, Shicong] China Acad Bldg Res, Beijing, Peoples R China.

[Hou, Jing] Beijing Jiaotong Univ, Beijing, Peoples R China.

RP Feng, W (reprint author), Lawrence Berkeley Natl Lab, Berkeley, CA 94720 USA.

EM weifeng@lbl.gov

CR Feng W., 2014, P AM COUNC EN EFF EC

Fridley D. G., 2008, ESTIMATING TOTAL ENE

Hong L., 2014, MODELING CHINAS BUIL

Hong TZ, 2009, ENERG BUILDINGS, V41, P426, DOI 10.1016/j.enbuild.2008.11.003

Perez-Lombard L, 2008, ENERG BUILDINGS, V40, P394, DOI 10.1016/j.enbuild.2007.03.007

Yan-ping F., 2009, ENERG POLICY, V37, P2060

Zhao J, 2009, ENERG POLICY, V37, P2092, DOI 10.1016/j.enpol.2008.11.043

Zhou N, 2012, ENERG EFFIC, V5, P51, DOI 10.1007/s12053-011-9111-0

[Anonymous], 2015, CFEEPL CHINA FENESTR

NR 9

TC 0

Z9 0

U1 0

U2 2

PU ELSEVIER SCIENCE BV

PI AMSTERDAM

PA SARA BURGERHARTSTRAAT 25, PO BOX 211, 1000 AE AMSTERDAM, NETHERLANDS

SN 1877-7058

J9 PROCEDIA ENGINEER

PY 2015

VL 121

BP 317

EP 324

DI 10.1016/j.proeng.2015.08.1074

PG 8

WC Construction & Building Technology; Engineering, Multidisciplinary

SC Construction & Building Technology; Engineering

GA BF2TP

UT WOS:000380499000045

OA gold

DA 2018-05-03

ER

PT J

AU Bhattacharyya, SC

AF Bhattacharyya, Subhes C.

TI Structural and macro-economic changes in India and the implications for  
the residential energy demand

SO WILEY INTERDISCIPLINARY REVIEWS-ENERGY AND ENVIRONMENT

LA English

DT Article

AB India, as a rising economic power, has undergone significant macro-economic and structural changes in recent decades. The accelerated economic growth in recent times has brought wide-ranging changes in life styles and behaviors of its growing population. At the same time, the population is undergoing a structural change and as this continues in the future, the country has the potential to reap the population dividend. As a consequence of these changes, the country is experiencing increased migration to urban areas, visible signs of consumerism in the fast-growing middle-class segment of the population, and an increasing trend of mimicking international styles. This paper provides an overview of the macro-economic and structural changes in India and considers the implications of such changes on India's residential energy needs. It suggests that life-style changes will have a significant implication on Indian future energy demand but there is a window of opportunity to follow a low-carbon pathway by adopting 'smart' technologies and creating efficient infrastructure. However, it requires a coordinated effort at various levels. (C) 2014 John Wiley & Sons, Ltd.

C1 De Montfort Univ, Inst Energy & Sustainable Dev, Leicester LE1 9BH, Leics, England.

RP Bhattacharyya, SC (reprint author), De Montfort Univ, Inst Energy & Sustainable Dev, Leicester LE1 9BH, Leics, England.

EM subhesb@dmu.ac.uk

RI Bhattacharyya, Subhes/O-5293-2016

OI Bhattacharyya, Subhes/0000-0002-1196-496X

CR Bhattacharyya SC, 2013, GLOBAL CHALLENGE OF ENCOURAGING SUSTAINABLE LIVING:

OPPORTUNITIES, BARRIERS, POLICY AND PRACTICE, P208

Bloom DE, 2011, 65 HARV U HARV SCH P

Farrel D, 2007, BUSINESS WEEK

GOI, 2012, 1 GOI OFF REG GEN 1

Goldman Sachs, 2010, IND REV

IEA (International Energy Agency), 2007, WORLD EN OUTL 2007 C

Kharas H., 2010, 284 OECD DEV CTR

la Rue D, 2009, RESIDENTIAL TRANSPOR

[Anonymous], 2010, IND URB AW BUILD INC

NSSO, 2012, HOUS CONS VAR GOODS

PwC, 2013, WORLD 2050 BRICS PRO

RBI, 2013, RBI HDB STAT IND EC

United Nations, 2011, WORLD POP PROSP 2010, V1

United Nations Population Division, 2012, WORLD POP PROSP 2012

The World Bank, 2008, RES CONS EL IND DOC

World Bank, 2013, IND DEV UPD OCT 2013

NR 16

TC 0

Z9 0

U1 0

U2 4

PU WILEY PERIODICALS, INC

PI SAN FRANCISCO

PA ONE MONTGOMERY ST, SUITE 1200, SAN FRANCISCO, CA 94104 USA  
 SN 2041-8396  
 EI 2041-840X  
 J9 WIRES ENERGY ENVIRON  
 JI Wiley Interdiscip. Rev. Energy Environ.  
 PD NOV-DEC  
 PY 2014  
 VL 3  
 IS 6  
 BP 535  
 EP 539  
 DI 10.1002/wene.108  
 PG 5  
 WC Energy & Fuels  
 SC Energy & Fuels  
 GA AQ9WS  
 UT WOS:000343209300001  
 DA 2018-05-03  
 ER

PT J

AU Penzes, J

Teperics, K

Radics, Z

Kulcsar, B

Kozma, G

Molnar, E

AF Penzes, Janos

Teperics, Karoly

Radics, Zsolt

Kulcsar, Balazs

Kozma, Gabor

Molnar, Erno

TI SOCIAL EMBEDDEDNESS OF ENERGY-EFFICIENT BUILDING METHODS IN THE NORTHERN  
 GREAT PLAIN REGION

SO ENVIRONMENTAL ENGINEERING AND MANAGEMENT JOURNAL

LA English

DT Article

DE energy efficiency; Northern Great Plain Region; public knowledge

ID COUNTRIES

AB The aim of the study is to reveal the energy-efficient technologies, related knowledge and information sources of the population in the Hungarian Northern Great Plain Region and to gain a understanding of their attitude towards the implementation of these technologies. The survey included questions about the alternative building technologies as well as the cost burden limits of considering their application. Special attention was given to getting information about the energy characteristics and maintenance problems of the dwellings.

The lessons learned from the data analysis are sufficient for the more successful promotion of the energy-efficiency issue and for changing current public attitudes.

C1 [Penzes, Janos; Teperics, Karoly; Radics, Zsolt; Kozma, Gabor; Molnar, Erno] Univ Debrecen, Fac Sci & Technol, H-4032 Debrecen, Hungary.

[Kulcsar, Balazs] Univ Debrecen, Fac Engr, H-4028 Debrecen, Hungary.

RP Penzes, J (reprint author), Univ Debrecen, Fac Sci & Technol, Egyet Ter 1, H-4032 Debrecen, Hungary.

EM penzes.janos@science.unideb.hu

FU European Union; European Social Fund;

[TAMOP-4.2.2.A-11/1/KONV-2012-0041]

FX The work is supported by the TAMOP-4.2.2.A-11/1/KONV-2012-0041 project.

The project is co-financed by the European Union and the European Social Fund.

CR Achtnicht M, 2014, ENER POLICY, V68, P254, DOI 10.1016/j.enpol.2014.01.006  
 Bertoldi P., 2009, ELECT CONSUMPTION EF  
 Boutin JP, 2007, ENVIRON ENG MANAG J, V6, P3  
 Carlsson Kanyama, 2005, INT J CONSUM STUD, V29, P239, DOI [10.1111/j.1470-6431.2005.00409.x, DOI 10.1111/J.1470-6431.2005.00409.X]  
 CEU, 2010, INFL LARG SCAL COMPL  
 CSO, 2013, NAT CENS HUNG 2011 H  
 Davis AL, 2013, APPL ENER, V111, P277, DOI 10.1016/j.apenergy.2013.04.088  
 EC (European Commission), 2010, EUR 2020 STRAT  
 EC, 2012, STRAT SUST COMP CONS  
 Fraunhofer ISI, 2009, ENERDATA STUDY ENER  
 Fulop O., 2011, RES REPORT  
 Guillet R, 2010, ENVIRON ENG MANAG J, V9, P1357  
 Haas R, 1997, ENER POLICY, V25, P789, DOI 10.1016/S0301-4215(97)00069-4  
 Hsueh SL, 2014, ENVIRON ENG MANAG J, V13, P1207  
 Ioan C.C., 2004, ENVIRON ENG MANAG J, V3, P35  
 Kincses A., 2014, NORSE GEOGRAFISK TID, V68, P301  
 McMichael M, 2013, ENER POLICY, V53, P159, DOI 10.1016/j.enpol.2012.10.039  
 Meyers S, 2003, ENERGY, V28, P755, DOI 10.1016/S0360-5442(02)00188-3  
 Mills B, 2012, ENER POLICY, V49, P616, DOI 10.1016/j.enpol.2012.07.008  
 MND, 2011, 2 ACT PLAN NAT EN EF  
 MND, 2012, NAT EN STRAT 2030  
 Pelenur MJ, 2012, ENERGY, V47, P348, DOI 10.1016/j.energy.2012.09.058  
 Penzes J., 2013, HUNGARIAN GEOGRAPHIC, V62, P373  
 Sovacool BK, 2009, TECHNOL SOC, V31, P365, DOI 10.1016/j.techsoc.2009.10.009  
 Uihlein A, 2010, ENER BUILDINGS, V42, P791, DOI 10.1016/j.enbuild.2009.11.016

NR 25

TC 0

Z9 0

U1 0

U2 1

PU GH ASACHI TECHNICAL UNIV IASI

PI IASI

PA 71 MANGERON BLVD, IASI, 700050, ROMANIA

SN 1582-9596

EI 1843-3707

J9 ENVIRON ENG MANAG J

J1 Environ. Eng. Manag. J.

PD NOV

PY 2014

VL 13

IS 11

BP 2859

EP 2866

PG 8

WC Environmental Sciences

SC Environmental Sciences & Ecology

GA AY4JR

UT WOS:000347544700022

DA 2018-05-03

ER

PT J

AU Tappler, R

Munoz-Czemy, U

Damberger, B

Twrdik, F

Ringer, W

Hutter, HP  
AF Tappler, R.  
Munoz-Czemy, U.  
Damberger, B.  
Twrdik, F.  
Ringer, W.  
Hutter, H. -P  
TI Occupants' health and indoor air quality in new built, energy efficient homes  
SO GEFAHRSTOFFE REINHALTUNG DER LUFT  
LA German  
DT Article  
AB In new buildings with tight building envelopes different systems of mechanical ventilation by a heat recovery ventilator are often used. However, many builders are still sceptical to what extent these innovative systems might lead to risks for occupants. The study, which is reported here, included indoor air pollution measurements (e.g. formaldehyde, volatile organic compounds and allergens) both in mechanically ventilated houses and in naturally ventilated homes as well as a medical survey among the occupants of these homes in order to determine the air pollution levels, the relationship between indoor air pollution and occupants' health and the changes during the period of one year period in these two different types of homes.  
C1 [Tappler, R.; Munoz-Czemy, U.; Damberger, B.; Twrdik, F.] IBO Osterreich Inst Baubiol & Bauokol, Vienna, Austria.  
[Ringer, W.] AGES Osterreich Agentur Gesundheit & Ernahrungss, Linz, Austria.  
[Hutter, H. -P] Med Univ Wien, ZPH, Inst Umwelthyg, Vienna, Austria.  
RP Tappler, R (reprint author), IBO Osterreich Inst Baubiol & Bauokol, Vienna, Austria.  
CR [Anonymous], 2011, RICHTL BEW INN  
[Anonymous], 2007, 13779 DIN EN  
[Anonymous], 2006, 160001 DIN EN ISO  
[Anonymous], 2011, 160003 DIN ISO  
Greml A., 2004, TECHNISCHER STATUS W  
Leech JA, 2004, INDOOR AIR, V14, P169, DOI 10.1111/j.1600-0668.2004.00212.x  
ONORM M, 2002, M5700 ONORM AUSTR ST  
Pfluger R, 2013, GEFAHRST REINHALT L, V73, P107  
Rohracher H., 2001, AKZEPTANZVERBESSERUN  
Wargocki P, 2000, INDOOR AIR, V10, P222, DOI 10.1034/j.1600-0668.2000.010004222.x  
NR 10  
TC 0  
Z9 0  
U1 1  
U2 11  
PU SPRINGER-V D I VERLAG GMBH & CO KG  
PI DUSSELDORF  
PA VDI-PLATZ 1, D-40468 DUSSELDORF, GERMANY  
SN 0949-8036  
EI 1436-4891  
J9 GEFAHRST REINHALT L  
JI Gefahrst. Reinhalt. Luft  
PD MAR  
PY 2014  
VL 74  
IS 3  
BP 75  
EP 78  
PG 4  
WC Engineering, Environmental; Engineering, Civil; Environmental Sciences  
SC Engineering; Environmental Sciences & Ecology  
GA AF0HQ  
UT WOS:000334395300004

DA 2018-05-03  
ER

PT J

AU Barkhudaryan, N  
Orosa, JA  
Roshan, G

AF Barkhudaryan, Naira  
Orosa, Jose A.  
Roshan, Gholamreza

TI A new procedure to analyze the effect of air changes in building energy consumption

SO JOURNAL OF ENVIRONMENTAL HEALTH SCIENCE AND ENGINEERING

LA English

DT Article

DE Energy; Ventilation; ISO13790; Climate change; Monte Carlo

AB Background: Today, the International Energy Agency is working under good practice guides that integrate appropriate and cost effective technologies. In this paper a new procedure to define building energy consumption in accordance with the ISO 13790 standard was performed and tested based on real data from a Spanish region.

Results: Results showed that the effect of air changes on building energy consumption can be defined using the Weibull peak function model. Furthermore, the effect of climate change on building energy consumption under several different air changes was nearly nil during the summer season.

Conclusions: The procedure obtained could be the much sought-after solution to the problem stated by researchers in the past and future research works relating to this new methodology could help us define the optimal improvement in real buildings to reduce energy consumption, and its related carbon dioxide emissions, at minimal economical cost.

C1 [Barkhudaryan, Naira; Orosa, Jose A.] Univ A Coruna, Dept Energy & MP, La Coruna 15011, Spain.

[Roshan, Gholamreza] Golestan Univ, Dept Geog, Gorgan 4913815759, Iran.

RP Roshan, G (reprint author), Golestan Univ, Dept Geog, Shahid Beheshti St, Gorgan 4913815759, Iran.

EM ghr.roshan@gu.ac.ir

OI Orosa, Jose A./0000-0002-8384-908X

CR [Anonymous], 2009, ASHRAE HDB

ISO, 2005, 137902005 ISODIS

MeteoGalicia, CONS MED AMB TERR IN

Orosa JA, 2012, ENER EDUC SCI TECH-A, V28, P897

Orosa JA, 2011, ADV NATURAL VENTILAT

Orosa JA, 2011, ADV ENERGY RES, V7

Orosa JA, 2010, ENER BUILDINGS, V42, P598, DOI 10.1016/j.enbuild.2009.10.030

Orosa JA, 2009, RENEW ENER, V34, P2735, DOI 10.1016/j.renene.2009.04.021

Orosa JA, 2009, ENER BUILDINGS, V41, P823, DOI 10.1016/j.enbuild.2009.03.004

NR 9

TC 0

Z9 0

U1 0

U2 3

PU BIOMED CENTRAL LTD

PI LONDON

PA 236 GRAYS INN RD, FLOOR 6, LONDON WC1X 8HL, ENGLAND

SN 2052-336X

J9 J ENVIRON HEALTH SCI

J1 J. Environ. Health Sci. Eng

PD JAN 21

PY 2014

VL 12

AR 37

DI 10.1186/2052-336X-12-37

PG 12

WC Engineering, Environmental; Environmental Sciences  
 SC Engineering; Environmental Sciences & Ecology  
 GA ABOAH  
 UT WOS:000331453700001  
 PM 24456655  
 OA gold  
 DA 2018-05-03  
 ER

PT S  
 AU Chabrol, M  
 AF Chabrol, Maximin  
 BE Lejoux, P  
 Ortar, N  
 TI Residential practices and household electricity consumption: a territorial approach to energy transition in the Provence-Alpes-Cote d'Azur region  
 SO TRANSITION ENERGETIQUE : VRAIS ENJEUX, FAUX DEPARTS?  
 SE SHS Web of Conferences  
 LA French  
 DT Proceedings Paper  
 CT Conference on Energy Transition - Real Issues, False Starts  
 CY OCT 21-22, 2013  
 CL Lyon, FRANCE  
 C1 [Chabrol, Maximin] Univ Avignon, Doctorant UMR ESPACE, F-84029 Avignon 01, France.  
 EM maximin.chabrol@alumni.univ-avignon.fr  
 CR Beguin M., 1994, REPRESENTATION DONNEE  
 Charre J., 1995, STAT TERRITOIRE  
 Chevalier J.-M., 2012, AVENIR ENERGETIQUE C  
 De Sede M. - H., 2007, FESTIVAL GEOGRAPHIE  
 Groupe Dupont, 2000, GEOPOINT 2000  
 Grandjean A., 2012, VERS SOC DESIRABLE  
 Merenne-Schoumaker B., 2007, GEOGRAPHIE ENERGIE A  
 Poidevin D., 1999, CARTE MOYEN ACTION  
 Region Paca, 2012, SCHEM REG AIR CLIM E  
 Rifkin Jeremy, 2012, TROISIEME REVOLUTION

NR 10  
 TC 0  
 Z9 0  
 U1 0  
 U2 0  
 PU E D P SCIENCES  
 PI CEDEX A  
 PA 17 AVE DU HOGGAR PARC D ACTIVITES COUTABOEUF BP 112, F-91944 CEDEX A,  
 FRANCE  
 SN 2261-2424  
 J9 SHS WEB CONF  
 PY 2014  
 VL 9  
 DI 10.1051/shsconf/20140904002  
 PG 10  
 WC Environmental Studies; Social Sciences, Interdisciplinary  
 SC Environmental Sciences & Ecology; Social Sciences - Other Topics  
 GA BB9FC  
 UT WOS:000348252300011  
 OA gold  
 DA 2018-05-03  
 ER

PT 5

AU Cheng, W

AF Cheng, Wei

BE Rui, H

TI Study of Residential Energy-saving Green Technology

SO ADVANCED RESEARCH IN MATERIAL SCIENCE AND MECHANICAL ENGINEERING, PTS 1

AND 2

SE Applied Mechanics and Materials

LA English

DT Proceedings Paper

CT 2nd International Conference on Mechanics and Control Engineering (ICMCE  
2013)

CY SEP 01-02, 2013

CL Beijing, PEOPLES R CHINA

SP SW Jiaotong Univ

DE Ecological Technology; Energy-Saving; Residence

AB The green house is a green building technology in residential application of the specific embodiment .It is the use of ecological principles and following the principles of sustainable development, ecological balance that is to design, organize indoor and outdoor spaces in residential buildings of various material factors and create no pollution, ecological smooth the built environment. Ecological Housing characteristics summarize in four aspects, namely, comfortable, healthy, efficient and beautiful. The pursuit of comfort and health are the basis of ecological residence and the pursuit of efficiency is the core of ecological residence as well as the pursuit of beauty is in harmony with nature ecological house of perfection. At present, the construction market in the application of ecological and energy-saving technologies exist errors, green technology does not mean that the ecological high-tech and high cost. Green paper from the overall current situation of residential construction, and ecological building techniques are used in a variety of ecological and energy-saving technologies that were specific research in the "Ecological housing design," The profound basis of knowledge and research focusing on ecological housing should be adopted by the design principles of appropriate technology through the specific architectural practice. It summarizes the key on the actual project that should be considered and applied technology.

C1 Wuhan Univ Sci &amp; Technol, Sch Urban Construct, Wuhan, Peoples R China.

RP Cheng, W (reprint author), Wuhan Univ Sci &amp; Technol, Sch Urban Construct, Wuhan, Peoples R China.

EM chengweiwh@126.com

CR Bezdek J C., 2003, J CLASSICAL MOBILE M, V6, P153

Miyamo S, 2006, GREEN ECOLOGY HOUSE, V16, P479

Mobasher B, 2004, C EXT EP DEC

Shahabi C, 2001, CREATING ECOLOGICAL

Sultan K S, 2005, J AUTOM REASONING, V76, P83

Xu L., 2001, P S PERF THEOR JAN 2

Yan T, 2002, P PODC JUL

Zadeh L A, 2004, J AUTONOMOUS COMPACT, V17, P20

NR 8

TC 0

Z9 0

U1 1

U2 11

PU TRANS TECH PUBLICATIONS LTD

PI STAFA-ZURICH

PA LAUBLSRUTISTR 24, CH-8717 STAFA-ZURICH, SWITZERLAND

SN 1660-9336

BN 978-3-03785-908-7

J9 APPL MECH MATER

PY 2014

VL 446-447

BP 1552

EP 1557

DI 10.4028/www.scientific.net/AMM.446-447.1552



PG 6

WC Engineering, Mechanical; Materials Science, Multidisciplinary; Mechanics

SC Engineering; Materials Science; Mechanics

GA BA8WW

UT WOS:000338976600290

DA 2018-05-03

ER

PT 5

AU Cowan, D

Maidment, G

Chaer, I

AF Cowan, David

Maidment, Graeme

Chaer, Issa

GP ASHRAE

TI Estimation of Cooling Energy Demand and Carbon Emissions from Urban

Buildings using a Quasi-dynamic Model

SO ASHRAE TRANSACTIONS 2014, VOL 120, PT 1

SE ASHRAE Transactions

LA English

DT Proceedings Paper

CT ASHRAE Winter Conference

CY 2014

CL New York, NY

SP ASHRAE

ID SIMULATION

AB Global warming and the urban heat island effect in large towns and cities demand new approaches to cooling buildings in an efficient and sustainable way. Modern refrigeration, air conditioning and heat pump (RACHP) systems can achieve a high coefficient of performance and low emissions, but refrigeration technology already accounts for around 15% of worldwide electricity use and up to 10% of all greenhouse gas emissions, so in the context of international agreements to reduce global greenhouse gas emissions by up to 80% RACHP systems alone cannot provide a sustainable cooling solution for cities.

The purpose of the model described in this paper is to provide a simple and easy to use tool to estimate the impact of different heating and cooling technologies, alternative building design and operating parameters and future global warming, on the energy demands and carbon emissions of buildings.

Existing software tools for analysis of buildings can provide high quality results for a given scenario, but the determination of an optimal solution demands multiple simulations, which can be time consuming and require post processing to interpret the results. The Excel based tool uses a quasi-dynamic energy balance model and reduced weather data set to generate rapid results, allowing the user to view the building's temperature profile, energy demands and carbon emissions in near real time and to develop an optimum cooling strategy. Results are presented for a single building version of the tool. When fully developed, it will allow the user to model clusters of buildings in an urban environment.

C1 [Cowan, David] UK Inst Refrigerat, London, England.

[Cowan, David] London South Bank Univ, London, England.

[Maidment, Graeme] London South Bank Univ, Fac Director Res & Knowledge, London, England.

[Maidment, Graeme] London South Bank Univ, Inst Refrigerat, London, England.

[Chaer, Issa] London South Bank Univ, Dept Urban Engr, London, England.

RP Cowan, D (reprint author), UK Inst Refrigerat, London, England.

FU UK Engineering and Physical Sciences Research Council; London

Development Agency; Institute of Refrigeration

FX This work has been funded by the UK Engineering and Physical Sciences

Research Council, London Development Agency and Institute of

Refrigeration. This publication reflects the views only of the authors,

and the funding bodies cannot be held responsible for any use which may be made of the information contained therein.

CR Attia S., 2011, STATE ART EXISTING E

CEN, 2008, 137902008 CEN ISO

Chartered Institution of Building Services Engineers (CIBSE), 2006, GUID A  
 CIBSE, 2005, TM36 CLIM CHANG IND  
 Crawley DB, 2008, BUILD ENVIRON, V43, P661, DOI 10.1016/j.buildenv.2006.10.027  
 GOV.UK, 2013, 2012 GREENH GAS CONV  
 IES, 2012, IES VIRT ENV  
 IIR, 2005, 1 SESS M PART KYOT P  
 Kalema T, 2008, J BUILD PHYS, V32, P101, DOI 10.1177/1744259108093920  
 ODPM, 2006, APPR DOC L2A CONS FU  
 Trcka M, 2010, AUTOMAT CONSTR, V19, P93, DOI 10.1016/j.autcon.2009.11.019

NR 11  
 TC 0  
 Z9 0  
 U1 0  
 U2 2  
 PU AMER SOC HEATING, REFRIGERATING AND AIR-CONDITIONING ENGS  
 PI ATLANTA  
 PA 1791 TULLIE CIRCLE NE, ATLANTA, GA 30329 USA  
 SN 0001-2505  
 J9 ASHRAE TRAN  
 PY 2014  
 VL 120  
 IS 1  
 PG 8  
 WC Thermodynamics; Construction & Building Technology  
 SC Thermodynamics; Construction & Building Technology  
 GA BB3GM  
 UT WOS:000342765800056  
 DA 2018-05-03  
 ER

PT B  
 AU De Rose, R  
 Felicetti, C  
 Raso, C  
 Felicetti, AM  
 AF De Rose, Raffaele  
 Felicetti, Carmelo  
 Raso, Cinzia  
 Felicetti, Alberto Michele  
 BE Carlucci, D  
 Spender, JC  
 Schiuma, G  
 TI Modelling Smart Home Environments for energy-efficiency and quality of  
 life.  
 SO IFKAD 2014: 9TH INTERNATIONAL FORUM ON KNOWLEDGE ASSET DYNAMICS:  
 KNOWLEDGE AND MANAGEMENT MODELS FOR SUSTAINABLE GROWTH  
 LA English  
 DT Proceedings Paper  
 CT 9th International Forum on Knowledge Asset Dynamics (IFKAD)  
 CY JUN 11-13, 2014  
 CL Matera, ITALY  
 SP Inst Knowledge Asset Management, Univ Basilicata, Arts Business Inst, Univ Basilicata, DIMIE  
 DE Smart Home Environment; Sustainability; Energy Efficiency; Home Energy  
 Management System  
 ID LOAD FORECASTING METHODS; ELECTRICITY CONSUMPTION; MANAGEMENT-SYSTEM;  
 NEURAL NETWORKS; IMPLEMENTATION; PREDICTION; SECTOR  
 AB Purpose - Recent years have been characterized by a growing interest toward sustainability issues. In fact,  
 themes such as a more efficient use of the energy resources have taken a central role in the debate on

energy policies of developed countries. In particular, it has been demonstrated that energy efficiency in residential buildings is one of the keys to reducing overall energy consumption and greenhouse emissions. In this work, we propose an innovative system for monitoring and managing energy consumption in "Smart Home Environments" (SHEs), according to the needs of users and to the particular state conditions of the considered environment.

Design/methodology/approach - The paper focuses on a methodological approach to design a SHE based on the following steps:

Identify and apply technological solutions to provide additional intelligence and connectivity services to existing heterogeneous home devices.

Define an architecture of SHE, supported by a centralized management system featuring a smart Central Control Unit (CCU) and different peripheral devices of sensing and actuating.

Define a data management model in order to handle machine-to-machine and machine-to-human interactions.

Define a set of decision algorithms and interoperability rules to perform energy-control services, basing on quantitative forecasting methodologies for analysis of historical data.

Originality/value - Different approaches to the design of SHEs are emerging in literature, emphasizing the importance of such a type of applications as a mean to guarantee energy and cost saving. However, most of these approaches are essentially focused on the technological issues, relying primarily on the architectural characteristics of the Home Energy Management Systems (HEMS). In this work, we intend to highlight how a knowledge-based management model can support the design of innovative HEMSs, providing the energy performance improvements of the considered environment and the adaptability to the user's habits and needs.

Practical implications - In line with the goals of Europe 2020 strategy, energy resource saving represent a key issue for sustainable development. Among the various technological solutions for reducing energy consumption in home environments, the so called "Building Automation and Control Systems" (BACS) represent high performance and low impact solutions for energy efficiency. In this context, the proposed system, whose development is ongoing, offers in prospect the opportunity to improve the energy performance and electricity cost saving of residential buildings, featuring at the same time a low architectural impact due to the use of wireless and/or powerline technologies.

C1 [De Rose, Raffaele; Felicetti, Carmelo; Raso, Cinzia] Nuova Tecnol Efficienza Energet & Qualita Vita, I-87036 Arcavacata Di Rende, CS, Italy.

[Felicetti, Alberto Michele] Univ Calabria, Dept Mech Energy & Management Engrn, I-87036 Arcavacata Di Rende, CS, Italy.

RP Raso, C (reprint author), Nuova Tecnol Efficienza Energet & Qualita Vita, Smart Bldg, Pedro Alvares Cabral 18, I-87036 Arcavacata Di Rende, CS, Italy.

CR Ahmad AS, 2014, RENEW SUST ENERG REV, V33, P102, DOI 10.1016/j.rser.2014.01.069

Al-Ghandoor A, 2008, ENERG POLICY, V36, P258, DOI 10.1016/j.enpol.2007.09.020

Atzori L, 2010, COMPUT NETW, V54, P2787, DOI 10.1016/j.comnet.2010.05.010

Aydinalp M, 2002, APPL ENERG, V71, P87, DOI 10.1016/S0306-2619(01)00049-6

CHEN CY, 2009, 7 IEEE INT C IND INF, P273

Cottet R, 2003, J AM STAT ASSOC, V98, P839, DOI 10.1198/016214503000000774

D& R International Ltd., 2012, 2011 BUILD EN DAT BO

Das SK, 2005, LECT NOTES COMPUT SC, V3776, P80

Elmenreich W., 2012, Proceedings of the 2012 10th Workshop on Intelligent Solutions in Embedded Systems (WISES 2012), P76

Feinberg EA, 2005, POWER ELECTRONICS P, P269, DOI 10.1007/0-387-23471-3\_12

Hahn H, 2009, EUR J OPER RES, V199, P902, DOI 10.1016/j.ejor.2009.01.062

Han DM, 2010, IEEE T CONSUM ELECTR, V56, P1417, DOI 10.1109/TCE.2010.5606278

HARRIS JL, 1993, INT J FORECASTING, V9, P437, DOI 10.1016/0169-2070(93)90072-U

Hippert HS, 2001, IEEE T POWER SYST, V16, P44, DOI 10.1109/59.910780

Mohamed Z, 2005, ENERGY, V30, P1833, DOI 10.1016/j.energy.2004.08.012

Moreno MV, 2014, T EMERG TELECOMMUN T, V25, P41, DOI 10.1002/ett.2771

Niyato D, 2011, IEEE COMMUN MAG, V49, P53, DOI 10.1109/MCOM.2011.5741146

Perumal T, 2008, SITIS 2008: 4TH INTERNATIONAL CONFERENCE ON SIGNAL IMAGE TECHNOLOGY AND INTERNET BASED SYSTEMS, PROCEEDINGS, P177, DOI 10.1109/SITIS.2008.94

Sayuti H, 2014, INT J DIGITAL INFORM, V4, P114

Soares LJ, 2008, INT J FORECASTING, V24, P630, DOI 10.1016/j.ijforecast.2008.08.003

Son YS, 2010, IEEE T CONSUM ELECTR, V56, P1380, DOI 10.1109/TCE.2010.5606273

Taylor JW, 2007, IEEE T POWER SYST, V22, P2213, DOI 10.1109/TPWRS.2007.907583  
 Viani F, 2013, P IEEE, V101, P2381, DOI 10.1109/JPROC.2013.2266858  
 Weiser M, 1999, IBM SYST J, V38, P693, DOI 10.1147/sj.384.0693  
 Zhao HX, 2012, RENEW SUST ENERG REV, V16, P3586, DOI 10.1016/j.rser.2012.02.049

NR 25

TC 0

Z9 0

U1 1

U2 7

PU IKAM-INST KNOWLEDGE ASSET MANAGEMENT

PI MATERA

PA VIA D SCHIAVONE 1, MATERA, MT 75100, ITALY

BN 978-88-96687-04-8

PY 2014

BP 3567

EP 3579

PG 13

WC Social Sciences, Interdisciplinary

SC Social Sciences - Other Topics

GA BDOJD

UT WOS:000357262304015

DA 2018-05-03

ER

PT B

AU Dirienzo, TP

Krishnan, NA

Srija

Santos, JR

AF Dirienzo, Thomas P.

Krishnan, Nathan A.

Srija

Santos, Joost R.

GP IEEE

TI Effects of Smart Appliances on Residential Consumption Patterns

SO 2014 SYSTEMS AND INFORMATION ENGINEERING DESIGN SYMPOSIUM (SIEDS)

LA English

DT Proceedings Paper

CT IEEE Systems and Information Engineering Design Symposium (SIEDS)

CY APR 25, 2014

CL Univ Virginia, Charlottesville, VA

SP IEEE, IEEE Syst Man & Cybernet Soc

HO Univ Virginia

DE behavioral patterns; energy consumption; smart appliance; scenario analysis

AB Despite the growing attention on environmental sustainability and technological advances to create new ways to reduce energy use, the U.S. remains the largest global energy consumer. Changing individuals' patterns of consumption is crucial to addressing the issue. While smart appliances are becoming prominent in the consumer market, only a few studies have been focused on their ability to influence individual decision-making. Smart appliance technologies have data storage capabilities that can be remotely accessed through modern user interfaces. This affords the ability for data-driven decision making through visual analytics. When given quantitative results, consumers tend to be more aware of their consumption behavior. Smart appliances can be utilized to reduce individual energy usage through incentivizing savings, while reducing greenhouse emissions. Through a systems-based scenario analysis, this paper analyzes the consumption of three residential user categories. The data is aggregated to depict the cost of annual energy usage, which is then optimized to show areas for cost savings. The benefits of these behavioral changes can be further expanded through interdisciplinary approaches. Future enhancements to smart appliance applications are also explored, particularly in areas of user interface, design, and

"gamification" of savings. These improvements, coupled with government home energy incentive programs, make the benefits of smart appliances more plausible. Empowering consumers with this technology can encourage sustainable behaviors that lead to reductions of the national carbon footprint.  
C1 [Dirienzo, Thomas P.; Krishnan, Nathan A.; Srija; Santos, Joost R.] George Washington Univ, Dept Engr Management & Syst Engr, Washington, DC 20052 USA.

RP Dirienzo, TP (reprint author), George Washington Univ, Dept Engr Management & Syst Engr, Washington, DC 20052 USA.

EM tdirienzo@gwu.edu; nathank@gwu.edu; srija@gwu.edu; joost@gwu.edu

CR Boehm B. W., 2006, J SYST ENG, V9, P1, DOI DOI 10.1002/SYS.V9:1.ACCESSED:MARCH

[Anonymous], 2008, HOM EN RAT SYST TECH

Ehrhardt-Martinez K., 2010, ADV METERING INITIAT

[Anonymous], 2013, EST APPL HOM EL EN U

[Anonymous], FED TAX CRED CONS EN

[Anonymous], GE BUILT IN DISHW HI

[Anonymous], GE EN STAR 4 1 DOE C

[Anonymous], GE 8 3 CU FT CAP RIG

INCOSE, 2012, INCOSETP20030020322

[Anonymous], 152882008 ISO

Magill B., 2013, HUFFINGTON POST

Nelder C., 2009, FORBES 0724

Drazen Prelec D. S., 2005, ALWAYS LEAVE HOME IT

[Anonymous], 2014, WHAT IS HERS IND

thermostat N., NEST WHITE PAPER THE

U. S. Energy Information Administration, 2013, IND STAT AN

[Anonymous], EST YEARL OP COST

[Anonymous], SCHED 6VP LARG GEN S

[Anonymous], 2012, GAS PRICES RISING AU

[Anonymous], 2013, AUTOMOTIVE NEWS 0625

NR 20

TC 0

Z9 0

U1 1

U2 5

PU IEEE

PI NEW YORK

PA 345 E 47TH ST, NEW YORK, NY 10017 USA

BN 978-1-4799-4836-9

PY 2014

PG 5

WC Computer Science, Information Systems; Engineering, Electrical & Electronic

SC Computer Science; Engineering

GA BC9JP

UT WOS:000356499600031

DA 2018-05-03

ER

PT S

AU Garabuau-Moussaoui, I

Thiriot, S

AF Garabuau-Moussaoui, Isabelle

Thiriot, Sarah

BE Lejoux, P

Ortar, N

TI The occupants of performance tertiary buildings in energy: between logics of use, wage and domestic

SO TRANSITION ENERGETIQUE : VRAIS ENJEUX, FAUX DEPARTS?

SE SHS Web of Conferences

LA French  
 DT Proceedings Paper  
 CT Conference on Energy Transition - Real Issues, False Starts  
 CY OCT 21-22, 2013  
 CL Lyon, FRANCE  
 C1 [Garabuau-Moussaoui, Isabelle] EDF R&D, F-92141 Clamart, France.  
 [Thiriot, Sarah] Inst Etud Polit, UMR Pacte, F-38040 Grenoble 9, France.  
 EM isabelle.moussaoui@edf.fr  
 CR Akrich M., 2000, SHAPING TECHNOLOGY B, P205  
 Brisepierre G., 2012, PRATIQUES CONSOMMATI  
 Broadbent S., 2011, INTIMITE TRAVAIL VIE  
 Brugidou M, 2013, GLOBAL CHALLENGE OF ENCOURAGING SUSTAINABLE LIVING:  
 OPPORTUNITIES, BARRIERS, POLICY AND PRACTICE, P143  
 Cooremans C, 2007, ECEEE 2007 SUMM STUD, P73  
 Desjeux D., 2010, MAITRISE ENERGIE ENT  
 Dibie P., 2012, ETHNOLOGIE PORTE  
 Dujin A., 2011, CREDOC CAHIER RECHER, V287  
 Garabuau-Moussaoui I., ENERGIE TEC IN PRESS  
 Garabuau-Moussaoui I., 2007, ANN RECHERCHE URBAIN, V103, P112  
 Guy S., 2000, SOCIOLOGY ENERGY BUI  
 Hall E. T., 1984, DIMENSION CACHEE  
 Monjaret A., 2001, CAHIERS PLURIDISCIPL, V2  
 Pautard E., 2009, THESIS  
 Pelegrin-Genel E., 2010, SOURIS LABYRINTHE DE  
 Rohracher H., 2005, USER INVOLVEMENT INN, P9  
 Thiriot S., 2013, OCCUPATION BATIMENT, V2  
 Weber Florence, 2009, TRAITE SOCIOLOGIE EC, P367  
 Wilhite H., 2007, ECEEE SUMM STUD P, P23  
 [Anonymous], 2010, POLITIQUE MAITRISE D  
 NR 20  
 TC 0  
 Z9 0  
 U1 0  
 U2 0  
 PU E D P SCIENCES  
 PI CEDEX A  
 PA 17 AVE DU HOGGAR PARC D ACTIVITES COUTABOEUF BP 112, F-91944 CEDEX A,  
 FRANCE  
 SN 2261-2424  
 J9 SHS WEB CONF  
 PY 2014  
 VL 9  
 DI 10.1051/shsconf/20140903001  
 PG 12  
 WC Environmental Studies; Social Sciences, Interdisciplinary  
 SC Environmental Sciences & Ecology; Social Sciences - Other Topics  
 GA BB9FC  
 UT WOS:000348252300007  
 OA gold  
 DA 2018-05-03  
 ER  
  
 PT S  
 AU Khan, S  
 Zulfiqar, M  
 Alahmad, M  
 Nguyen, L  
 Sharif, H

- Aljuhaishi, N  
 Gaouda, A  
 Shuaib, K  
 Abdel-Hafez, M  
 AF Khan, Sameena  
 Zulfiqar, Muhammad  
 Alahmad, Mahmoud  
 Lim Nguyen  
 Sharif, Hamid  
 Aljuhaishi, Nasser  
 Gaouda, Ahmed  
 Shuaib, Khaled  
 Abdel-Hafez, Mohammed
- GP IEEE
- TI Energy Node Locator - A Pathway to Track Energy At The Point of Use,  
 Remotely, in Buildings
- SO IECON 2014 - 40TH ANNUAL CONFERENCE OF THE IEEE INDUSTRIAL ELECTRONICS  
 SOCIETY
- SE IEEE Industrial Electronics Society
- LA English
- DT Proceedings Paper
- CT 40th Annual Conference of the IEEE-Industrial-Electronics-Society  
 (IECON)
- CY OCT 29-NOV 01, 2014
- CL Dallas, TX
- SP Inst Elect & Elect Engineers, IEEE Ind Elect Soc
- DE energy conservation; real-time monitoring; node monitoring; Time Domain  
 Reflectometry
- AB The smart grid will increase building energy efficiency and conservation via combining information and communication technologies, advanced instrumentations, system intelligence, and information on the end user. Specifically Demand Side Management (DSM) programs serve as an aid in energy conservation and management strategies as well as in the collection of real-time consumption information data. As proposed in this paper, real-time, fine-grain consumption data at the point of use in buildings can be used by building energy managers, utilities, and the end user for planning, load forecasting, and feedback for providing information that may lead to end user behavior change. This paper focuses on the development of a platform detecting every active node in the building remotely and using a combination of tools to monitor and locate these active nodes. The paper will discuss the main component of this platform, the energy node locator and how it works based on the principles of Time Domain Reflectometry (TDR). Preliminary results will be presented and used to evaluate the node locator principles. Summary and future work will be presented to discuss the framework moving forward.
- C1 [Khan, Sameena; Zulfiqar, Muhammad; Alahmad, Mahmoud; Lim Nguyen; Sharif, Hamid] Univ Nebraska, Omaha, NE 68182 USA.  
 [Aljuhaishi, Nasser] Kuwait Univ, Kuwait, Kuwait.  
 [Gaouda, Ahmed; Shuaib, Khaled; Abdel-Hafez, Mohammed] United Arab Emirates Univ, Al Ain, U Arab Emirates.
- RP Khan, S (reprint author), Univ Nebraska, Omaha, NE 68182 USA.
- CR AEA Technology Inc, 2005, AN200 BAS THEOR TDR  
 Agilent Technologies, 2006, 130427 AG TECHN  
 Alahmad Mahmoud A., 2012, IEEE T IND ELECT, V59  
 Annala Salla, 2013, IECON 2013 39 ANN C  
 BERGES M, 2009, ASCE INT WORKSH COMP  
 Boshell F., 2008, P IEEE TRANSM DISTR, P1  
 Buevich M., 2011, IEEE 17 INT C EMB RE  
 Chung You Chung, 2009, IEEE T INSTRUMENTATI, V58  
 Croft Aaron, 2013, IND EL SOC IECON 201  
 Department Of Energy Energy Information Admission, 2006, DOEIEA0383  
 Falvo M. C., 2013, IND EL SOC IECON 201  
 Furse C, 2006, SMART STRUCT SYST, V2, P25, DOI 10.12989/sss.2006.2.1.025

Grindvoll Hanne, 2012, WIRELESS SENSOR NETW, V17, P43  
 Hartebrodt Martin, 2004, AFRICON 2004 7 AFRIC, V1  
 Kim Z. C. Younghun, 2009, UBICOMP, P245  
 Kuhn Paul K., 2006, AG EL SYST RES APPL  
 Lifton J, 2007, PROCEEDINGS OF THE SIXTH INTERNATIONAL SYMPOSIUM ON INFORMATION PROCESSING IN SENSOR NETWORKS, P119, DOI 10.1109/IPSN.2007.4379671  
 Liu W, 2011, SER INF MANAGE SCI, V10, P1  
 LiveWire Innovation, FAULTCHASER PROD  
 McKenney K., 2010, COMMERCIAL MISCELLAN  
 Mohsenian-Rad AH, 2010, IEEE T SMART GRID, V1, P320, DOI 10.1109/TSG.2010.2089069  
 O'Connell S., 2011, 2011 INT C DISTR COM  
 Palensky P, 2011, IEEE T IND INFORM, V7, P381, DOI 10.1109/TII.2011.2158841  
 Reis J., 2007, SEQUENCE SPREAD SPEC  
 Rieur E, 2014, IEEE T IND INFORM, V10, P742, DOI 10.1109/TII.2013.2245909  
 Smith P, 2005, IEEE SENS J, V5, P1469, DOI 10.1109/JSEN.2005.858964  
 U.S. Energy Information Administration, AEO2014 EARL REL OV  
 USGBC, GREEN BUILD FACTS  
 Williams ED, 2007, IEEE INT SYMP ELECTR, P239, DOI 10.1109/ISEE.2007.369401

NR 29  
 TC 0  
 Z9 0  
 U1 0  
 U2 1  
 PU IEEE  
 PI NEW YORK  
 PA 345 E 47TH ST, NEW YORK, NY 10017 USA  
 SN 1553-572X  
 BN 978-1-4799-4032-5  
 J9 IEEE IND ELEC  
 PY 2014  
 BP 5363  
 EP 5368  
 PG 6  
 WC Automation & Control Systems; Engineering, Industrial; Engineering, Electrical & Electronic  
 SC Automation & Control Systems; Engineering  
 GA BG5FY  
 UT WOS:000389471605018  
 DA 2018-05-03  
 ER

PT S  
 AU Levorato, M  
   Ahmed, N  
   Zhang, YA  
 AF Levorato, Marco  
   Ahmed, Nadia  
   Zhang, Yang Arthur  
 GP IEEE  
 TI Consumer in-the-Loop: Consumers as Part of Residential Smart Energy Systems  
 SO 2014 IEEE INTERNATIONAL CONFERENCE ON SMART GRID COMMUNICATIONS (SMARTGRIDCOMM)  
 SE International Conference on Smart Grid Communications  
 LA English  
 DT Proceedings Paper  
 CT 2014 IEEE International Conference on Smart Grid Communications (SmartGridComm)



CY NOV 03-06, 2014

CL Venice, ITALY

ID DEMAND RESPONSE

AB A novel framework for residential smart energy systems is proposed. The model integrates the consumer behavior in the dynamics of the technological and environmental components of the system. The objective is to classify and optimize the whole system, which includes the dynamics of the consumer. The framework is based on Markov process, model detection and Hidden Markov Model Theory. The behavior of the consumer is classified from a sequence of available observations within a set of reference classes. The detected class is used as prior information to detect the state of the system and provide feedback to the consumer to reduce the probability that undesirable states occur within a time window.

C1 [Levorato, Marco] Univ Calif Irvine, Donald Bren Sch Informat & Comp Sci, Irvine, CA 92697 USA.

[Levorato, Marco; Ahmed, Nadia; Zhang, Yang Arthur] Univ Calif Irvine, Calif Inst Telecommun & Informat Technol, Irvine, CA USA.

RP Levorato, M (reprint author), Univ Calif Irvine, Donald Bren Sch Informat & Comp Sci, Irvine, CA 92697 USA.

EM levorato@uci.edu; ahmedn@uci.edu; yzhang@calit2.uci.edu

CR Amin S. F., 2005, IEEE POWER ENERGY M, P34, DOI [10.1109/MPAE.2005.1507024, DOI 10.1109/MPAE.2005.1507024]

Bertsekas D. P., 1995, DYNAMIC PROGRAMMING, V1

Borenstein S., 2002, DYNAMIC PRICING ADV

Chen C, 2013, PERSVASIVE MOB COMPUT, V9, P161, DOI 10.1016/j.pmcj.2012.10.004

ELLIOTT RJ, 1995, HIDDEN MARKOV MODELS

Farhangi H, 2010, IEEE POWER ENERGY M, V8, P18, DOI 10.1109/MPE.2009.934876

Gatsis N, 2011, IEEE DECIS CONTR P, P1, DOI 10.1109/CDC.2011.6161103

Goonewardena M, 2012, IEEE GLOBE WORK, P1520, DOI 10.1109/GLOCOMW.2012.6477811

Goudarzi H., 2011, IEEE INT C SMART GRI, P351

JELINEK F, 1976, P IEEE, V64, P532, DOI 10.1109/PROC.1976.10159

Jiang BN, 2011, ENRGY PROCED, V12, DOI 10.1016/j.egypro.2011.10.012

Levorato M, 2012, PR IEEE SEN ARRAY, P5, DOI 10.1109/SAM.2012.6250561

Li N., 2011, IEEE POW EN SOC GEN, P1

Meyn S., 2009, MARKOV CHAINS STOCHA

O'Neill D, 2010, INT CONF SMART GRID, P409, DOI 10.1109/SMARTGRID.2010.5622078

Rashidi P, 2013, ACM T INTEL SYST TEC, V4, DOI 10.1145/2508037.2508045

Schwarzer J, 2013, IEEE IND ELEC, P4797, DOI 10.1109/IECON.2013.6699911

Sou KC, 2011, IEEE DECIS CONTR P, P5144, DOI 10.1109/CDC.2011.6161081

Taylor H. M., 1994, INTRO STOCHASTIC MOD

Tischer H., 2011, INNOVATIVE SMART GRI, P1

Turitsyn K, 2011, IEEE DECIS CONTR P, P7

Wang ZF, 2010, INT CONF SMART GRID, P13, DOI 10.1109/SMARTGRID.2010.5622005

NR 22

TC 0

Z9 0

U1 0

U2 0

PU IEEE

PI NEW YORK

PA 345 E 47TH ST, NEW YORK, NY 10017 USA

SN 2373-6836

BN 978-1-4799-4934-2

J9 INT CONF SMART GRID

PY 2014

BP 758

EP 763

PG 6

WC Engineering, Electrical & Electronic; Telecommunications

SC Engineering; Telecommunications

GA BF2FI

UT WOS:000380462700127

DA 2018-05-03

ER

PT 5

AU Li, C

Hong, TZ

AF Li, Cheng

Hong, Tianzhen

GP ASHRAE

TI Revisit of Energy Use and Technologies of High Performance Buildings

SO ASHRAE TRANSACTIONS 2014, VOL 120, PT 2

SE ASHRAE Transactions

LA English

DT Proceedings Paper

CT ASHRAE Annual Conference

CY JUN 28-JUL 02, 2014

CL Seattle, WA

SP ASHRAE

AB Energy consumed by buildings accounts for one third of the world's total primary energy use. Associated with the conscious of energy savings in buildings, High Performance Buildings (HPBs) has surged across the world, with wide promotion and adoption of various performance rating and certification systems. It is valuable to look into the actual energy performance of HPBs and to understand their influencing factors.

To shed some light on this topic, this paper conducted a series of portfolio analysis based on a database of 51 high performance office buildings across the world. Analyses showed that the actual site Energy Use Intensity (EUI) of the 51 buildings varied by a factor of up to 11, indicating a large scale of variation of the actual energy performance of the current HPBs. Further analysis of the correlation between EUI and climate elucidated ubiquitous phenomenon of EUI scatter throughout all climate zones, implying that the weather is not a decisive factor, although important, for the actual energy consumption of an individual building. On the building size via EUI, analysis disclosed that smaller buildings have a tendency to achieving lower energy use. Even so, the correlation is not absolute since some large buildings demonstrated low energy use while some small buildings performed opposite. Concerning the technologies, statistics indicated that the application of some technologies had correlations with some specific building size and climate characteristic. However, it was still hard to pinpoint a set of technologies which was directly correlative with a group of low EUI buildings.

It is concluded that no a single factor essentially determines the actual energy performance of HPBs. To deliver energy-efficient buildings, an integrated design taking account of climate, technology, occupant behavior as well as operation and maintenance should be implemented.

C1 [Li, Cheng; Hong, Tianzhen] Univ Calif Berkeley, Lawrence Berkeley Natl Lab, Dept Bldg Technol & Urban Syst, Berkeley, CA 94720 USA.

RP Li, C (reprint author), Univ Calif Berkeley, Lawrence Berkeley Natl Lab, Dept Bldg Technol & Urban Syst, Berkeley, CA 94720 USA.

CR Fowler KM, 2010, RE ASSESSING GREEN B

Hong TZ, 2013, APPL ENERG, V111, P333, DOI 10.1016/j.apenergy.2013.05.019

Lawrence Berkeley National Laboratory, 2013, EN IQ

New Building Institute (NBI), 2012, GETT ZER 2012 STAT U

New Buildings Institute, 2013, BUILD DAT

Peterman A, 2012, ENERG POLICY, V43, P415, DOI 10.1016/j.enpol.2012.01.026

Turner C., 2008, ENERGY PERFORMANCE L

U.S. Department of Energy, 2012, EN EFF TRENDS RES CO

U.S. Department of Energy, 2011, ACH 30 GOAL EN COST

U.S. Department of Energy, 2013, BUILD DAT

U.S. Department of Energy, 2013, BUILD PERF DAT

U.S. Energy Information Administration, 2013, EN EFF ADM COMM BUIL

Yudelson J., 2013, WORLDS GREENEST BUIL

NR 13

TC 0

Z9 0

U1 0

U2 1

PU AMER SOC HEATING, REFRIGERATING AND AIR-CONDITIONING ENGS

PI ATLANTA

PA 1791 TULLIE CIRCLE NE, ATLANTA, GA 30329 USA

SN 0001-2505

BN 978-1-936504-82-4

J9 ASHRAE TRAN

PY 2014

VL 120

PN 2

PG 8

WC Thermodynamics; Construction &amp; Building Technology

SC Thermodynamics; Construction &amp; Building Technology

GA BB8GU

UT WOS:000346573500033

DA 2018-05-03

ER

PT S

AU Li, ZJ

Qi, ZY

AF Li, Zhijie

Qi, Zhongying

BE Xu, Q

Li, H

Li, Q

TI Direct and Indirect Household Energy Consumption in China

SO SUSTAINABLE DEVELOPMENT OF INDUSTRY AND ECONOMY, PTS 1 AND 2

SE Advanced Materials Research

LA English

DT Proceedings Paper

CT 3rd International Conference on Energy, Environment and Sustainable

Development (EESD 2013)

CY NOV 12-13, 2013

CL Shanghai, PEOPLES R CHINA

SP Shanghai Univ Elect Power, Shanghai Normal Univ

DE direct energy consumption; indirect energy consumption; input-output  
model

AB Nowadays, China has paid much attention to industrial energy consumption. In fact, household energy consumption, close related to everyone's daily life, is playing a more and more important role. In this paper, we utilize input-output model to obtain the value of indirect household energy consumption. We find out the structures of direct and indirect consumption and the gap between rural and urban energy consumption. The results show that the energy consumption structure is cleaner than before, and the gap between rural and urban energy consumption is narrowing. We make the suggestions that clean coal technology is badly needed and supplying more natural gas is helpful.

C1 [Li, Zhijie; Qi, Zhongying] Harbin Inst Technol, Sch Management, Harbin 150001, Peoples R China.

RP Li, ZJ (reprint author), Harbin Inst Technol, Sch Management, Harbin 150001, Peoples R China.

EM gloriajie1@gmail.com; qizy@hit.edu.cn

CR Bai Nuanzheng, 2010, MANAGEMENT WORLD, V32, P44

Biesiot W, 1999, ECOL ECON, V28, P367, DOI 10.1016/S0921-8009(98)00113-X

Li Yanmei, 2008, RESOURCE SCI, V6, P890

Reinders AHME, 2003, ENERG POLICY, V31, P139, DOI 10.1016/S0301-4215(02)00019-8

Wassily-Leontief, 1936, REV EC STAT, V8

Yuan Haiwei, 2008, EMPIRICAL CONSUMPTIO, V24, P37

Zhang X, 2011, CHINA SOFT SCI, P65

NR 7

TC 0

Z9 0

U1 0  
 U2 6  
 PU TRANS TECH PUBLICATIONS LTD  
 PI STAFA-ZURICH  
 PA LAUBLSRUTISTR 24, CH-8717 STAFA-ZURICH, SWITZERLAND  
 SN 1022-6680  
 BN 978-3-03785-975-9  
 J9 ADV MATER RES-SWITZ  
 PY 2014  
 VL 869-870  
 BP 844  
 EP 847  
 DI 10.4028/www.scientific.net/AMR.869-870.844  
 PG 4  
 WC Energy & Fuels; Environmental Sciences; Materials Science,  
 Multidisciplinary  
 SC Energy & Fuels; Environmental Sciences & Ecology; Materials Science  
 GA BA9CI  
 UT WOS:000339125800160  
 DA 2018-05-03  
 ER

PT S

AU Nikolaeva, EL  
 Kazeykin, VS  
 Eliseev, VI  
 Sedov, AV

AF Nikolaeva, E. L.  
 Kazeykin, V. S.  
 Eliseev, V. I.  
 Sedov, Artem V.

BE Drusa, M  
 Nikolic, RR  
 Marschalko, M

TI Scientific Fundamentals and Investment Mechanisms for the Implementation  
 of Socially and Energy-Efficient Technologies of Creation and  
 Intelligent Control of Low-Rise Building Lifecycle

SO XXIII R-S-P SEMINAR, THEORETICAL FOUNDATION OF CIVIL ENGINEERING (23RSP)  
 (TFOCE 2014)

SE Procedia Engineering

LA English

DT Proceedings Paper

CT 23rd Russian-Polish-Slovak Seminar on Theoretical Foundation of Civil  
 Engineering (RSP) (TFoCE)

CY AUG 25-29, 2014

CL Wroclaw, POLAND

SP Warsaw Univ, Fac Civil Engrn Wroclaw, Univ Zilina, Fac Civil Engrn

DE energy-efficient technologies; intelligent life-cycle control

AB This article is a description of the conducted work and analysis programs to address one of the key tasks facing Russia - the decision of a housing problem. The result must be qualitatively new level of the state of the housing facilities, they are based on the principles of creating a safe and comfortable, environment of human activities, compliance of the housing facilities with modern requirements for environmental and energy efficiency, creation of conditions for improvement of the demographic situation, the implementation of an effective migration policy, reduction of social tension in the society, increasing the share of people who have the opportunity to purchase or build individual homes by private and/or borrowed funds, improvement of public satisfaction with the level of housing and communal service. (C) 2014 The Authors. Published by Elsevier Ltd.

C1 [Nikolaeva, E. L.; Kazeykin, V. S.] Moscow State Univ Civil Engrn, Moscow 109012, Russia.

[Eliseev, V. I.] Moscow State Univ Civil Engn, Moscow 119991, Russia.

[Sedov, Artem V.] Moscow State Univ Civil Engn, Yaroslavskoe Shosse 26, Moscow 129327, Russia.

RP Sedov, AV (reprint author), Moscow State Univ Civil Engn, Yaroslavskoe Shosse 26, Moscow 129327, Russia.

EM sedov.eit@gmail.com

CR Andrey V, 2014, ADV MATER RES-SWITZ, V838-841, P2973, DOI 10.4028/www.scientific.net/AMR.838-841.2973

Andrey V, 2013, APPL MECH MATER, V409-410, P392, DOI 10.4028/www.scientific.net/AMM.409-410.392

Volkov A.A., 2014, ADV MAT RES, P2864

Volkov A, 2014, ADV MAT RES, V838-841, P2969

NR 4

TC 0

Z9 0

U1 0

U2 0

PU ELSEVIER SCIENCE BV

PI AMSTERDAM

PA SARA BURGERHARTSTRAAT 25, PO BOX 211, 1000 AE AMSTERDAM, NETHERLANDS

SN 1877-7058

J9 PROCEDIA ENGINEER

PY 2014

VL 91

BP 390

EP 393

DI 10.1016/j.proeng.2014.12.081

PG 4

WC Engineering, Civil

SC Engineering

GA BH0WE

UT WOS:000396731100069

OA gold

DA 2018-05-03

ER

PT S

AU Qin, L

AF Qin, Liang

BE Zhang, X

Zhang, B

Jiang, L

Xie, M

TI Explore the Energy-saving comprehensive renovation of existing residential Buildings in cold areas-Taking Taiyuan University of Technology ChangFeng residential area as an example

SO CIVIL, STRUCTURAL AND ENVIRONMENTAL ENGINEERING, PTS 1-4

SE Advanced Materials Research

LA English

DT Proceedings Paper

CT 2nd Global Conference on Civil, Structural and Environmental Engineering (GCCSEE 2013)

CY SEP 28-29, 2013

CL Shenzhen, PEOPLES R CHINA

SP Liaoning Tech Univ

DE Existing housing; Building energy efficiency; Comprehensive reconstruction

AB With the environment increasingly worsening, global warming has become an environmental problem challenged around the world. The cognition of low carbon and environmental protection has been widely

spread and applied in urban planning construction. Universities are the frontiers of scientific research. At university such aspects like construction energy conservation and the use of new material have been put into practice, and under the guidance of planning, construction, management departments and others, the ideas of low carbon and ecology is promoted to build the campus with sustainable development.

Universities play a leading role for all walks of life in society.

C1 Taiyuan Univ Technol, Architecture & Civil Engrn Inst, Taiyuan, Shanxi, Peoples R China.

RP Qin, L (reprint author), Taiyuan Univ Technol, Architecture & Civil Engrn Inst, Taiyuan, Shanxi, Peoples R China.

EM tyutqj@163.com

CR Qing Xiaolong, 2007, DBJ042422012, P9

NR 1

TC 0

Z9 0

U1 2

U2 13

PU TRANS TECH PUBLICATIONS LTD

PI STAFA-ZURICH

PA LAUBLSRUTISTR 24, CH-8717 STAFA-ZURICH, SWITZERLAND

SN 1022-6680

BN 978-3-03785-926-1

J9 ADV MATER RES-SWITZ

PY 2014

VL 838-841

BP 2865

EP 2869

DI 10.4028/www.scientific.net/AMR.838-841.2865

PG 5

WC Engineering, Multidisciplinary

SC Engineering

GA BA9LS

UT WOS:000339531701226

DA 2018-05-03

ER

PT B

AU Song, RS

AF Song, Runsheng

BE Kong, A

TI The Study of Household New Energy Vehicle Consumer Behavior Based on Cluster Analysis and AHP Consumer Decision Model

SO PROCEEDINGS OF THE INTERNATIONAL CONFERENCE ON MANAGEMENT AND ENGINEERING (CME 2014)

LA English

DT Proceedings Paper

CT International Conference on Management and Engineering (CME)

CY MAY 24-25, 2014

CL Shanghai, PEOPLES R CHINA

AB Up to now, the difficulty of promoting of new energy vehicles still lies in family car market. In this paper, I apply cluster analysis method, cluster household vehicle users by qualifying their travel characteristics, construct consumer purchase willingness model using Analytic Hierarchy Process (AHP) and then analyze each kind of user's acceptance of new energy vehicles. Finally I mine the potential market segment which new energy household vehicles may break in.

C1 Shenzhen Polytech, Sch Automot & Transportat Engrn, Shenzhen, Guangdong, Peoples R China.

RP Song, RS (reprint author), Shenzhen Polytech, Sch Automot & Transportat Engrn, Shenzhen, Guangdong, Peoples R China.

CR Jun Ma, 2009, J TONGJI U NATURAL S, V37, P1081

Marx K., COLLECTED WORKS K MA, V29, P269

Saaty T., 2001, MODELS METHODS CONCE, V34

Saaty T. L., 1980, ANAL HIERARCHY PROCE  
 Gang Wang, 2003, QUANTITATIVE ANAL EV, P377  
 Xue Wei, 2006, STAT ANAL BASED SPSS, P321  
 Wilson R. M. S., 2005, STRATEGIC MARKETING, P171  
 Yang XIN, 2001, THESIS U TECHNOLOGY, P10  
 Yongqing Yang, 1994, SYSTEM ENG, V12, P68

NR 9

TC 0

Z9 0

U1 0

U2 1

PU DESTECH PUBLICATIONS, INC

PI LANCASTER

PA 439 DUKE STREET, LANCASTER, PA 17602-4967 USA

BN 978-1-60595-174-4

PY 2014

BP 1275

EP 1280

PG 6

WC Business; Business, Finance; Management

SC Business & Economics

GA BC2LK

UT WOS:000351057000177

DA 2018-05-03

ER

PT S

AU Wang, ZL

Paranjape, R

AF Wang, Zhanle

Paranjape, Raman

GP IEEE

TI Agent-Based Simulation of Home Energy Management System in Residential  
 Demand Response

SO 2014 IEEE 27TH CANADIAN CONFERENCE ON ELECTRICAL AND COMPUTER  
 ENGINEERING (CCECE)

SE Canadian Conference on Electrical and Computer Engineering

LA English

DT Proceedings Paper

CT IEEE 27th Canadian Conference on Electrical and Computer Engineering  
 (CCECE)

CY MAY 04-07, 2014

CL Toronto, CANADA

SP IEEE, Ryerson Univ, Fac Engn & Architectural Sci, The Personal, Mercer, Ontario Soc Profess Engineers,  
 KPMG, IEEE Canada, IEEE Toronto Sect, IEEE Peterborough Sect, IEEE Canada, Kitchener Waterloo Sect,  
 IEEE London Sect, IEEE Hamilton Sect, IEEE Kingston Sect

ID MULTIAGENT SYSTEMS

AB This paper presents an agent-base model to evaluate the home energy management system in residential demand response implementation. Residential demand response aims to change people's electricity consumption patterns to reduce the peak demand and therefore improve energy efficiency and power system stability. The home energy management system intelligently controls household loads with association of smart meters. It plays key roles in a success demand response implementation. In the proposed agent-based model, the main stakeholders are modelled by the software agents including Conventional Home Agents, Smart Home Agents, a Utility Agent, a Primary Plant Agent and Secondary Plant Agents. A mechanism of dynamic pricing is applied to both the Conventional Home Agent System (Scenario #1) and the Smart Home Agent System (Scenario #2). Comparing to the Scenario #1, the peak demand, average householder's bills and generation cost in the Scenario #2 is decreased by 24.6%, 7.4% and 14.7% respectively. This demonstrates the effectiveness of the home energy management system in the

residential demand response implementation. The proposed model can be a test-bed to evaluate various demand response strategies and technologies.

C1 [Wang, Zhanle; Paranjape, Raman] Univ Regina, Elect Syst Engr, Regina, SK S4S 0A2, Canada.  
 RP Wang, ZL (reprint author), Univ Regina, Elect Syst Engr, Regina, SK S4S 0A2, Canada.  
 EM Raman.Paranjape@uregina.ca

CR Canadian Electricity Association, 2006, POW GEN CAN  
 Chao H., 2010, ELECT J, V23, P7  
 Conchado A, 2012, HDB NETWORKS POWER S, P281, DOI DOI 10.1007/978-3-642-23193-3\_11  
 McArthur SDJ, 2007, IEEE T POWER SYST, V22, P1743, DOI 10.1109/TPWRS.2007.908471  
 Office for National Statistics, 2000, UK TIME USE SURVEY  
 Oliveira E, 1999, ROBOT AUTON SYST, V27, P91, DOI 10.1016/S0921-8890(98)00085-2  
 Ontario Energy Board, 2013, EL PRIC  
 Richardson I., 2010, DOMESTIC ELECT DEMAN  
 Richardson I, 2010, ENERG BUILDINGS, V42, P1878, DOI 10.1016/j.enbuild.2010.05.023  
 Rocky Mountain Institute, 2006, AUT DEM RESP SYST PI  
 Sycara KP, 1998, AI MAG, V19, P79  
 The U.S. Department of Energy, 2013, THE SMART HOME  
 Wang Z., 2013, EL COMP ENG CCECE 20, P1  
 Wooldridge Michael, 2002, INTRO MULTIAGENT SYS  
 [Anonymous], 2006, BENEFITS DEMAND RESP

NR 15  
 TC 0  
 Z9 0  
 U1 0  
 U2 1  
 PU IEEE  
 PI NEW YORK  
 PA 345 E 47TH ST, NEW YORK, NY 10017 USA  
 SN 0840-7789  
 BN 978-1-4799-3099-9  
 J9 CAN CON EL COMP EN  
 PY 2014  
 PG 6  
 WC Computer Science, Theory & Methods; Engineering, Electrical & Electronic  
 SC Computer Science; Engineering  
 GA BD4QI  
 UT WOS:000361017900247  
 DA 2018-05-03  
 ER

PT S  
 AU Yong, Z  
     Jian, Z  
     Yu, WH  
 AF Yong, Zhang  
     Jian, Zhang  
     Yu, Wang Hui  
 BE Yarlagadda, P  
     Choi, SB  
     Kim, YH

TI Study on Energy-saving Control System of Smart Home  
 SO COMPUTER AND INFORMATION TECHNOLOGY  
 SE Applied Mechanics and Materials  
 LA English  
 DT Proceedings Paper  
 CT International Forum on Computer and Information Technology (IFCIT)  
 CY DEC 24-25, 2013  
 CL Shenzhen, PEOPLES R CHINA



DE Data Transmission; Energy Systems; System Design; Intelligent Control  
ID INFORMATION

AB The wireless network technology can achieve harmony and coordination of residential environment, this paper studies the smart home system energy saving control system design, system design ensures the correct transmission of data in the system of communication protocols. This class smart home smart home system using traditional control technology and system improvements made, there is a certain degree of intelligence programs home improvement, cost, and power consumption is significantly reduced, improving the accuracy of the data transfer for the establishment of a targeted communication conflict-free data transmission protocol, and ultimately achieve intelligent energy control.

C1 [Yong, Zhang; Jian, Zhang; Yu, Wang Hui] Chongqing Water Resources & Elect Engn Coll, Chongqing 402160, Peoples R China.

RP Yong, Z (reprint author), Chongqing Water Resources & Elect Engn Coll, Chongqing 402160, Peoples R China.

EM cqcszyong@yeah.net

CR Al-Ali AR, 2011, ENRGY PROCED, V12, DOI 10.1016/j.egypro.2011.10.017

Broer T, 2014, APPL ENERG, V113, P199, DOI 10.1016/j.apenergy.2013.06.058

Giorgio A.D., 2012, APPL ENERG, V96, P92

Giorgio A. D., 2014, CONTROL ENG PRACT, V22, P147, DOI

<http://dx.doi.org/10.1016/j.conengprac.2013.10.005>

Kofler MJ, 2012, ENERG BUILDINGS, V47, P169, DOI 10.1016/j.enbuild.2011.11.044

Shin JH, 2012, PROCEDIA COMPUT SCI, V10, P197, DOI 10.1016/j.procs.2012.06.028

Torunski E, 2012, PROCEDIA COMPUT SCI, V10, P205, DOI 10.1016/j.procs.2012.06.029

NR 7

TC 0

Z9 0

U1 0

U2 1

PU TRANS TECH PUBLICATIONS LTD

PI STAFA-ZURICH

PA LAUBLSRUTISTR 24, CH-8717 STAFA-ZURICH, SWITZERLAND

SN 1660-9336

BN 978-3-03835-019-4

J9 APPL MECH MATER

PY 2014

VL 519-520

BP 1333

EP 1336

DI 10.4028/www.scientific.net/AMM.519-520.1333

PG 4

WC Computer Science, Artificial Intelligence; Computer Science, Hardware & Architecture; Computer Science, Interdisciplinary Applications

SC Computer Science

GA BC0BP

UT WOS:000348897600259

DA 2018-05-03

ER

PT S

AU Zhao, J

Khmelenko, V

Claridge, D

AF Zhao, Juan

Khmelenko, Vasiliy

Claridge, David

GP ASHRAE

TI Performance Study of an Under-floor Air Distribution System in an Education Building to Identify Building Energy Efficiency Improvement Opportunities

SO ASHRAE TRANSACTIONS 2014, VOL 120, PT 2  
SE ASHRAE Transactions  
LA English  
DT Proceedings Paper  
CT ASHRAE Annual Conference  
CY JUN 28-JUL 02, 2014  
CL Seattle, WA  
SP ASHRAE  
ID COMMERCIAL BUILDINGS; UFAD SYSTEM

AB The HVAC system accounts for 30 to 50 percent of a typical building's energy consumption; in hot and humid climates it is closer to the upper end of that range. Implementing effective energy saving measures for the building HVAC system can reduce the building energy consumption, reduce peak demand, and improve building comfort. In recent years, under-floor air distribution system (UFADS) is used as an innovative approach to HVAC system to offer utmost in occupant comfort, improved indoor air quality and energy savings. In this study, the operation and performance of a UFAD system in an education building located in a hot and humid area is evaluated. The study found the building was overcooled and the UFAD system was in reheat mode even in hot summer. Optimizing existing air handling unit (AHU) discharge air temperature (DAT) set point reset based on building load and reducing under-floor plenum static pressure in half are recommended to improve building comfort and energy performance. It is estimated that implementing the optimized AHU DAT set point reset schedule can potentially reduce about 30% of the UFAD system thermal decay. The reduction of the under-floor plenum static pressure in half can potentially reduce the system minimum airflow rate by about 30 %.

C1 [Zhao, Juan; Khmelenko, Vasilii; Claridge, David] Texas A&M Univ, Energy Syst Lab, College Stn, TX 77834 USA.

RP Zhao, J (reprint author), Texas A&M Univ, Energy Syst Lab, College Stn, TX 77834 USA.

CR Alajmi A, 2010, ENERGMANAGE, V51, P1637, DOI 10.1016/j.enconman.2009.12.040

Bauman F., 2003, UNDERFLOOR AIR DISTR

Bauman F.S, 2006, ASHRAE T 2, V112

Fisk W., 2005, LBNL56257 EN AN ENV

Ho S.H., 2012, BUILD ENVIRON, V46, P1415

Lee KH, 2012, APPL ENERGMANAGE, V91, P197, DOI 10.1016/j.apenergy.2011.09.011

Montanya EC, 2009, ASHRAE J, V51, P30

Schiavon S, 2011, ENERGMANAGE, V43, P517, DOI 10.1016/j.enbuild.2010.10.017

Schiavon S, 2010, ENERGMANAGE, V42, P1182, DOI 10.1016/j.enbuild.2010.02.009

Webster T., 2002, P IND AIR 2002 MONT

Webster T., 2004, LBNL49527 U CAL CTR

Zukowski M, 2007, BUILD ENVIRON, V42, P171, DOI 10.1016/j.buildenv.2005.08.024

NR 12

TC 0

Z9 0

U1 1

U2 3

PU AMER SOC HEATING, REFRIGERATING AND AIR-CONDITIONING ENGS

PI ATLANTA

PA 1791 TULLIE CIRCLE NE, ATLANTA, GA 30329 USA

SN 0001-2505

BN 978-1-936504-82-4

J9 ASHRAE TRAN

PY 2014

VL 120

PN 2

PG 8

WC Thermodynamics; Construction & Building Technology

SC Thermodynamics; Construction & Building Technology

GA BB8GU

UT WOS:000346573500055

DA 2018-05-03

ER

PT B

AU Altan, H  
 Shiram, R  
 Kim, YK  
 Mohammadian, K  
 Zemleduch, B

AF Altan, Hasim  
 Shiram, Rohan  
 Kim, Young Ki  
 Mohammadian, Khashayar  
 Zemleduch, Blazej

BE Wurtz, E

TI USING ENERGY MODELLING FOR CALCULATIONS OF ENERGY SAVINGS, PAYBACK AND RETURN ON INVESTMENT FOR A TYPICAL COMMERCIAL OFFICE BUILDING WITH IBT SYSTEMS

SO BUILDING SIMULATION 2013: 13TH INTERNATIONAL CONFERENCE OF THE INTERNATIONAL BUILDING PERFORMANCE SIMULATION ASSOCIATION

LA English

DT Proceedings Paper

CT 13th International Conference of the International-Building-Performance-Simulation-Association (IBPSA)

CY AUG 25-28, 2013

CL Chambéry, FRANCE

SP Int Bldg Performance Simulat Assoc

AB This paper describes and focuses on the applications of a new range of smart building products, particularly Integrated Building Technology (IBT) systems, with the aim to demonstrate savings for improving energy efficiency and indoor environments in buildings. A typical commercial office space has been modelled via dynamic computer simulation software, considering scenarios of before and after the installation of IBT systems. This has then been compared against different building regulations and standards e.g. UK Building Regulation 2006 and ASHRAE 90.1. The study revealed 35% of energy savings per year, a payback period of nearly 1 year, and the return on investment (ROI) of approximately 65% using the IBT systems.

C1 [Altan, Hasim; Shiram, Rohan; Kim, Young Ki; Mohammadian, Khashayar; Zemleduch, Blazej] Univ Sheffield, Sch Architecture, BEAU, Sheffield, S Yorkshire, England.

RP Altan, H (reprint author), Univ Sheffield, Sch Architecture, BEAU, Sheffield, S Yorkshire, England.

FU Engineering and Physical Sciences Research Council (EPSRC)

FX This paper is the result of the work undertaken as part of Crestron Integrated Building Technology (IBT) project between BEAU research centre at the University of Sheffield and Crestron UK Ltd through knowledge transfer funding provided by the Engineering and Physical Sciences Research Council (EPSRC).

CR BEAU, 2012, CRESTR IBT PROJ

Brambley M. R., 2005, PNNL15149 US DOE

Brown T. C., 1998, FIRE PROTECTION SYST

CIBSE, 2006, ENV DES GUID

CIBSE, 2008, EN BENCHM TM46

Crestron, 2012, EN SAV MAN

Carbon Trust, 2007, BUILD CONTR

Cumali Z., 1988, ASHRAE T, V94, P729

DECC, 2011, EN CONS UK 2011

DEFRA, 2008, CLIM CHANG BILL FIN

EST, 2012, ENGL UK UT TAR

ETSU, 2000, EN CONS GUID 19 EN U

Halonon L., 2010, GUIDEBOOK ENERGY EFF

National Calculation Methodology (NCM), MOD GUID BUILD OTH D

Nicholls R., 2002, LOW ENERGY DESIGN AC

ODPM, 2006, L2B ODPM

Schmertz M. F., 1976, OFFICE BUILDING DESI  
 Siemens, 2013, SMART CONTR BUILD SY  
 Zhou DM, 2012, ENRGY PROCED, V14, P592, DOI 10.1016/j.egypro.2011.12.980

NR 19

TC 0

Z9 0

U1 0

U2 0

PU INT BUILDING PERFORMANCE SIMULATION ASSOC-IBPSA

PI TORONTO

PA C/O MILLER-THOMPSON, 40 KING ST W, STE 5800, TORONTO, M5H 3S1, CANADA

BN 978-2-7466-6294-0

PY 2013

BP 799

EP 805

PG 7

WC Construction & Building Technology

SC Construction & Building Technology

GA BI7ZP

UT WOS:000414802200104

DA 2018-05-03

ER

PT B

AU Aoki, T

Habara, H

Shimoda, Y

AF Aoki, Takuya

Habara, Hiromi

Shimoda, Yoshiyuki

BE Wurtz, E

TI DEVELOPMENT AND VALIDATION OF A RESIDENTIAL SECTOR ENERGY END-USE

PREDICTION MODEL TO ESTIMATE RESIDENTIAL ENERGY CONSUMPTION IN JAPAN

SO BUILDING SIMULATION 2013: 13TH INTERNATIONAL CONFERENCE OF THE

INTERNATIONAL BUILDING PERFORMANCE SIMULATION ASSOCIATION

LA English

DT Proceedings Paper

CT 13th International Conference of the

International-Building-Performance-Simulation-Association (IBPSA)

CY AUG 25-28, 2013

CL Chambéry, FRANCE

SP Int Bldg Performance Simulat Assoc

AB We developed a "data preparation model" to complement the database for the estimation of energy consumption in the Japanese residential sector from 1990 to 2010. In particular, we developed a "stock model" for water heaters to estimate the diffusion of high-efficiency water heaters. Energy consumption is estimated by a "residential sector energy end-use prediction model" which was developed originally by our research group. In addition, we validated the results and analyzed the dominant factors related to energy consumption in the residential sector. The simulated total energy consumption was within 17% of the actual energy supply in 1990 and 2000, while the result in 2010 was underestimated by 24-35%. The most important factor for reducing energy consumption was found to be an improvement in appliance efficiency.

C1 [Aoki, Takuya; Habara, Hiromi; Shimoda, Yoshiyuki] Osaka Univ, Grad Sch Engr, Div Sustainable Energy & Environm Engr, 2-1 Yamadaoka, Suita, Osaka 5650871, Japan.

RP Aoki, T (reprint author), Osaka Univ, Grad Sch Engr, Div Sustainable Energy & Environm Engr, 2-1 Yamadaoka, Suita, Osaka 5650871, Japan.

CR Agency for Natural Resource and Energy, 2012, REG EN STAT

Agency for Natural Resource and Energy and Energy Conservation Center, 2005, JAP EN CONS LAW

Japan Industrial Association of Gas and Kerosene Appliances, 2007, ACT IND ASS TEST SYS

Japan Industrial Association of Gas and Kerosene Appliances, 2011, STAT SHIPM VAR PROD  
 Jyukankyo Research Institute Inc, 2010, ANN REP HOUS EN STAT  
 Mata E, 2013, ENER BUILDINGS, V56, P100, DOI 10.1016/j.enbuild.2012.09.037  
 Ministry of Economy Trade and Industry, 2012, CURR SURV PROD  
 Osaka Prefecture, 2012, OSAKA STATISTIC YB  
 Shimoda Y, 2007, ENERGY, V32, P1617, DOI 10.1016/j.energy.2007.01.007  
 Statistics Bureau and Statistics Center, 2010, POP CENS JAP

NR 10

TC 0

Z9 0

U1 0

U2 0

PU INT BUILDING PERFORMANCE SIMULATION ASSOC-IBPSA

PI TORONTO

PA C/O MILLER-THOMPSON, 40 KING ST W, STE 5800, TORONTO, M5H 3S1, CANADA

BN 978-2-7466-6294-0

PY 2013

BP 2519

EP 2526

PG 8

WC Construction & Building Technology

SC Construction & Building Technology

GA BI7ZP

UT WOS:000414802202070

DA 2018-05-03

ER

PT S

AU Arnold, D

Sankur, M

Auslander, DM

AF Arnold, Daniel

Sankur, Michael

Auslander, David M.

GP IEEE

TI The Next Generation Energy Information Gateway for use in Residential  
and Commercial Environments

SO 2013 IEEE POWER AND ENERGY SOCIETY GENERAL MEETING (PES)

SE IEEE Power and Energy Society General Meeting PESGM

LA English

DT Proceedings Paper

CT General Meeting of the IEEE-Power-and-Energy-Society (PES)

CY JUL 21-25, 2013

CL Vancouver, CANADA

SP IEEE Power & Energy Soc

DE Smart Grid; Demand Response; Energy Management System; Energy  
Information Gateway

AB Both the current state of technology as well as emerging trends in home/office automation and energy management necessitate the presence of a piece of software dedicated towards facilitating interoperability amongst heterogeneous components; therefore empowering occupants to manage these spaces more effectively. This paper outlines the software architecture of an Energy Information Gateway, which is the latest evolution of an open source reference design that utilizes a modular software architecture to create an environment where dissimilar communicable components can not only exchange energy related information, but participate in supervisory control efforts. This latest version of the software allows for the abstraction of physical devices into a common standard, thereby allowing unlike components to join the home or office energy network. In addition, the software allows for definitions to be made of the hierarchical relationship between devices in the physical world and for these relationships to be dynamically altered.

C1 [Arnold, Daniel; Sankur, Michael; Auslander, David M.] Univ Calif Berkeley, Dept Mech Engr, Berkeley, CA 94720 USA.

RP Arnold, D (reprint author), Univ Calif Berkeley, Dept Mech Engr, Berkeley, CA 94720 USA.

CR Arnold D., 2012, P IEEE POW EN SOC GE

LeMay M., 2008, P 41 HAW INT C SYST

McParland C., 2011, P IEEE POW EN SOC GE

Pal A., 2011, 2011 2 INT C INT SYS

Piette M. A., 2009, J COMPUTING SCI INFO, V9

Pipattanasomporn M., 2012, P 2012 IEEE POW EN S

US Energy Information Administration, 2012, DOE/EIA03842011

Weng Thomas, 2011, P ACM WORKSH EMB SEN

NR 8

TC 0

Z9 0

U1 0

U2 1

PU IEEE

PI NEW YORK

PA 345 E 47TH ST, NEW YORK, NY 10017 USA

SN 1944-9925

BN 978-1-4799-1303-9

J9 IEEE POW ENER SOC GE

PY 2013

PG 5

WC Energy & Fuels; Engineering, Electrical & Electronic

SC Energy & Fuels; Engineering

GA BAOLX

UT WOS:000331874302031

DA 2018-05-03

ER

PT S

AU Bajada, J

Fox, M

Long, D

AF Bajada, Josef

Fox, Maria

Long, Derek

GP IEEE

TI Load Modelling and Simulation of Household Electricity Consumption for the Evaluation of Demand-Side Management Strategies

SO 2013 4TH IEEE/PES INNOVATIVE SMART GRID TECHNOLOGIES EUROPE (ISGT EUROPE)

SE IEEE PES Innovative Smart Grid Technologies Conference Europe

LA English

DT Proceedings Paper

CT 4th IEEE/PES Innovative Smart Grid Technologies Europe (ISGT EUROPE)

CY OCT 06-09, 2013

CL Lyngby, DENMARK

SP IEEE PES

DE load modelling; stochastic systems; computer simulation; power demand

AB In order to evaluate the effectiveness of demand-side management techniques, mechanisms to simulate electricity consumption activities at a granular level are required. A bottom-up approach that uses a non-homogeneous Markov chain to model each appliance within each household is proposed. This model is time-aware and captures the variability of the transition probabilities as they change throughout the day. A simulator was developed based on this model and it was configured with data obtained from a household electricity survey conducted in the UK. The resultant load curves from a simulation of a thousand households are compared with the average hourly load reported in the survey, with significant

similarities observed between the two. The same model can be parametrised to simulate hypothetical scenarios, such as a future where electric vehicles are more popular. The simulation framework also supports a plug-in mechanism through which demand control policies can be integrated into the system such that the effects and performance of demand-side management strategies can be evaluated.

C1 [Bajada, Josef; Fox, Maria; Long, Derek] Kings Coll London, Dept Informat, London WC2R 2LS, England.  
RP Bajada, J (reprint author), Kings Coll London, Dept Informat, London WC2R 2LS, England.

EM josef.bajada@kcl.ac.uk; maria.fox@kcl.ac.uk; derek.long@kcl.ac.uk

CR AMDEA, 2011, EL US

Ardakanian O., 2012, P 3 INT C FUT EN SYS, P1

Ardakanian O., 2011, P 2 ACM SIGCOMM WORK, P31, DOI DOI 10.1145/2018536.2018544

Banks J, 2004, DISCRETE EVENT SYSTE

Rossello Busquet Ana, 2011, RIS INT EN C, P156

CAPASSO A, 1994, IEEE T POWER SYST, V9, P957, DOI 10.1109/59.317650

Chandrasekaran B., 2009, SURVEY NETWORK TRAFF

IEA (International Energy Agency), 2003, COOL APPL POL STRAT

Karnouskos S, 2009, 2009 THIRD UKSIM EUROPEAN SYMPOSIUM ON COMPUTER MODELING AND SIMULATION (EMS 2009), P424, DOI 10.1109/EMS.2009.53

Knuth D., 1969, ART COMPUTER PROGRAM

McQueen DHO, 2004, IEEE T POWER SYST, V19, P1685, DOI 10.1109/TPWRS.2004.826800

Pina A, 2012, ENERGY, V41, P128, DOI 10.1016/j.energy.2011.06.013

Richardson I, 2010, ENERGBUILDINGS, V42, P1878, DOI 10.1016/j.enbuild.2010.05.023

Widen J, 2009, P SCI C EN SYST IT A

Widen J, 2010, APPL ENERGB, V87, P1880, DOI 10.1016/j.apenergy.2009.11.006

Zimmermann J.-P., 2012, HOUSEHOLD ELECT SURV

NR 16

TC 0

Z9 0

U1 0

U2 0

PU IEEE

PI NEW YORK

PA 345 E 47TH ST, NEW YORK, NY 10017 USA

SN 2165-4816

BN 978-1-4799-2984-9

J9 IEEE PES INNOV SMART

PY 2013

PG 5

WC Engineering, Electrical & Electronic

SC Engineering

GA BAOBX

UT WOS:000330939800020

DA 2018-05-03

ER

PT B

AU Balsamo, D

Paci, G

Benini, L

Davide, B

AF Balsamo, Domenico

Paci, Giacomo

Benini, Luca

Davide, Brunelli

GP IEEE

TI Long Term, Low Cost, Passive Environmental Monitoring of Heritage

Buildings for Energy Efficiency Retrofitting

SO 2013 IEEE WORKSHOP ON ENVIRONMENTAL, ENERGY AND STRUCTURAL MONITORING SYSTEMS (EESMS 2013)

LA English

DT Proceedings Paper

CT IEEE Workshop on Environmental Energy and Structural Monitoring Systems  
(EESMS)

CY SEP 11-12, 2013

CL Trento, ITALY

SP Univ Trento, Dept Ind Engn, IEEE, IEEE Italy Sect, IEEE Italy Sect Syst Council Chapter, IEEE Italy Sect  
Instrumentat & Measurement Soc Chapter

AB Monitoring the structural health and the local climate of historical heritage buildings may be a hard task for civil engineers for assessing the energy efficiency of the environment, due to the lack of a pre-existing monitoring model, and due to the presence of deployments with strict installation constraints. This paper reports on the experience gathered during an European Project (3ENCULT Project - Efficient Energy for EU Cultural Heritage) regarding the design and implementation of an innovative technological network for monitoring heritage buildings. We present hardware and software solution developed to efficiently satisfy the requirements for long-term monitoring of a historical building, called 'Palazzina della Viola', and located in the centre of Bologna, Italy. The presented system provides real-time feedback to civil engineers which can retrieve sensed data using remote interfaces. Based on 7 months of operation, we show that the proposed solution, compared with other standard monitoring systems, is an effective low-cost alternative testing tool for assessing the environmental monitoring in heritage buildings. The system allows a reliable data transfer and we estimated the lifetime beyond two years.

C1 [Balsamo, Domenico; Paci, Giacomo; Benini, Luca] Univ Bologna, DEI, Viale Risorgimento 2, Bologna, Italy.

[Davide, Brunelli] Univ Trento, Trento, Italy.

RP Balsamo, D (reprint author), Univ Bologna, DEI, Viale Risorgimento 2, Bologna, Italy.

EM domenico.balsamo@unibo.it; giacomo.paci@unibo.it; luca.benini@unibo.it;  
davide.brunelli@unitn.it

RI Brunelli, Davide/H-7927-2012

OI Brunelli, Davide/0000-0001-5110-6823

FU EU

FX The research leading to these results has received funding from the projects 3ENCULT and GreenDataNet, both funded by the EU 7th Framework Programme. In addition, the authors would like to thank WISPES srl for the implementation of the prototypes.

CR Abrardo A., 2010, ENV EN STRUCT MON SY, P98

Anastasi G., 2009, HUM SYST INT 2009 HS, P574

Brunelli D, 2012, ELECTRON LETT, V48, P1026, DOI 10.1049/el.2012.1246

Buratti C, 2009, IEEE T VEH TECHNOL, V58, P3480, DOI 10.1109/TVT.2009.2014956

Caione C., 2013, IND INFORM IEEE T

Caione C, 2012, IEEE T IND INFORM, V8, P30, DOI 10.1109/TII.2011.2173500

CARLI D., 2011, DES AUT TEST EUR C E, P1

Cerioti M, 2009, 2009 INTERNATIONAL CONFERENCE ON INFORMATION PROCESSING IN SENSOR NETWORKS (IPSN 2009), P277

D'Amato F., 2012, ENV EN STRUCT MON SY, P1

de Brito L., 2008, WIR MOB COMM 2008 IC, P364

Dondi D, 2008, 2008 IEEE INTERNATIONAL CONFERENCE ON SUSTAINABLE ENERGY TECHNOLOGIES (ICSET), VOLS 1 AND 2, P945, DOI 10.1109/ICSET.2008.4747143

Ferrari F., 2011, IPSN, P73

Gajbhiye Pradnya, 2008, APPL DIGITAL INFORM, P426, DOI 10.1109/ICADIWT.2008.4664386

Gu C., 2012, WIR SENS SENS NETW W, P33

JIANG XD, 2009, ANT SEC ID COMM 2009, P449

Kim S., 2007, IPSN 07, P254, DOI DOI 10.1145/1236360.1236395

Morello R., 2010, INSTR MEAS TECHN C I, P1150

Neri A., 2009, ENV EN STRUCT MON SY, P93

Porcarelli D., 2013, ADV SENS INT IWASI 2, P200

Porcarelli D., 2012, POW EL EL DRIV AUT M, P946

Porcarelli D, 2013, DES AUT TEST EUROPE, P1155

Weddell A. S., 2013, DES AUT TEST EUR C E, P905, DOI DOI 10.7873/DATE.2013.190

Zonta D, 2008, INT J ARCHIT HERIT, V2, P200, DOI 10.1080/15583050802063691



[Anonymous], 2010, 802154 IEEE  
 NR 24  
 TC 0  
 Z9 0  
 U1 1  
 U2 3  
 PU IEEE  
 PI NEW YORK  
 PA 345 E 47TH ST, NEW YORK, NY 10017 USA  
 BN 978-1-4799-0628-4  
 PY 2013  
 BP 13  
 EP 18  
 PG 6  
 WC Energy & Fuels; Engineering, Civil; Engineering, Electrical & Electronic  
 SC Energy & Fuels; Engineering  
 GA BA4CK  
 UT WOS:000335332600003  
 DA 2018-05-03  
 ER

PT S  
 AU Di, P  
     Zhang, QY  
 AF Di, Peng  
     Zhang, Qinyao  
 BE Yang, W  
     Liang, JG  
 TI Analysis of the Rural House Energy-Saving Technology in Gansu  
 SO SUSTAINABLE DEVELOPMENT AND ENVIRONMENT II, PTS 1 AND 2  
 SE Applied Mechanics and Materials  
 LA English  
 DT Proceedings Paper  
 CT 2nd International Conference on Civil, Architectural and Hydraulic  
     Engineering (ICCAHE 2013)  
 CY JUL 27-28, 2013  
 CL Zhuhai, PEOPLES R CHINA  
 DE Gansu rural house; energy-saving; building envelope; solar energy;  
     biogas  
 AB In the context of China accelerates the new rural construction and promotes residential energy-saving,  
     through a combination of Gansu climate, resources and rural house features, analyzed the material  
     selection, forms and practices of rural house envelope, found the fundamental cause of leading the energy  
     consumption and poor insulation in local rural house, and made some concrete improvements.  
     Meanwhile, studied the application of passive solar houses, solar water heaters, as well as "four in one"  
     type of biogas energy utilization system model in a local rural house, to improve energy efficiency and  
     provide a reference to the new rural development.  
 C1 [Di, Peng; Zhang, Qinyao] Xian Univ Sci & Technol, Coll Architecture & Civil Engn, Xian 710054, Shaanxi,  
     Peoples R China.  
 RP Di, P (reprint author), Xian Univ Sci & Technol, Coll Architecture & Civil Engn, 58 Yanta Rd, Xian 710054,  
     Shaanxi, Peoples R China.  
 EM dipeng3066@sina.com.cn; zhangqy222@sina.cn  
 CR Gao Qian, 2011, CONSTRUCTION TECHNOLOG, V40, P98  
     Jian Fuhui, 2012, SCI TECHNICAL INFORM, V41, P70  
     Xie Xingqi, 2008, SCI TECHNOLOGY INNOV, V20, P98  
     Yan Ningna, 2010, J ANHUI AGR SCI, V38, P1006  
     Zhang Jizhuang, 2003, ENERG ENG, V4, P23  
     ZHENG Zhu-ling, 2008, BUILDING SCI, V24, P9  
 NR 6

TC 0

Z9 0

U1 1

U2 6

PU TRANS TECH PUBLICATIONS LTD

PI STAFA-ZURICH

PA LAUBLSRUTISTR 24, CH-8717 STAFA-ZURICH, SWITZERLAND

SN 1660-9336

BN 978-3-03785-858-5

J9 APPL MECH MATER

PY 2013

VL 409-410

BP 589

EP 592

DI 10.4028/www.scientific.net/AMM.409-410.589

PG 4

WC Engineering, Civil; Engineering, Mechanical; Environmental Sciences

SC Engineering; Environmental Sciences &amp; Ecology

GA BA4VI

UT WOS:000336337400114

DA 2018-05-03

ER

FN Clarivate Analytics Web of Science

VR 1.0

PT S

AU Liu, HZ

Zhu, YH

AF Liu, Hanzhou

Zhu, Yahong

BE Huang, Y

Bao, T

Wang, H

TI Experiences and Enlightenment in Energy-Saving of Newly-Built House from Developed Countries

SO CONSTRUCTION AND URBAN PLANNING, PTS 1-4

SE Advanced Materials Research

LA English

DT Proceedings Paper

CT International Conference on Structures and Building Materials (ICSBM 2013)

CY MAR 09-10, 2013

CL Guizhou, PEOPLES R CHINA

DE developed countries; residential energy-saving; experience; enlightenment

AB In the process to build a sustainable society, building energy consumption keeps raising with the people's living standard. Therefore, reducing building energy consumption is an important guarantee to lower the whole country's energy consumption and build an economical society. Also, the development and construction of energy-efficient building is an important guarantee to reduce building energy consumption. As newly-built house is a major part of building construction, energy consumption reduction for new house plays an influential role in the action to reduce building energy consumption. The practical experiences of new house energy-saving in the developed countries, Japan as an example, are introduced. In this paper, a support system to promote our country's newly-built house energy-saving is proposed as a scientific reference for managers from government, enterprise, industry association to make energy saving policy and development planning.

Developed countries, as Japan, have support systems and practical experience of residential housing energy-saving from laws and regulations, incentive policies, authentication and identification systems, technology innovation systems, energy-saving technology and some other fields. By learning the experience of newly-built house energy-saving from developed countries, we can build a support system

to promote our country's newly-built house energy-saving and it also can provide a scientific reference for managers from government, enterprise, industry association to make energy saving policy and development planning. It has huge practical significance to promote the overall development of the building energy-saving level and the development of energy-saving residential industrialization.

C1 [Liu, Hanzhou] Henan Univ, Sch Civil Engn & Architecture, Kaifeng 475004, Peoples R China.  
 [Zhu, Yahong] Xuchang Univ, Coll Urban Environm, Xuchang 46001, Peoples R China.  
 RP Liu, HZ (reprint author), Henan Univ, Sch Civil Engn & Architecture, Kaifeng 475004, Peoples R China.  
 EM zhliu\_001@163.com  
 CR Chen Haiyue, 2010, ENERGY SAVING ENV PR, P32  
 Jiang Yihua, 2007, INT EC COOPERATION, P73  
 Yan De, 2007, CHINAS SCI TECHNOLOG, P77  
 Zhang You, TOKYO SHANGHAI REPOR

NR 4  
 TC 0  
 Z9 0  
 U1 0  
 U2 4  
 PU TRANS TECH PUBLICATIONS LTD  
 PI DURNTEN-ZURICH  
 PA KREUZSTRASSE 10, 8635 DURNTEN-ZURICH, SWITZERLAND  
 SN 1022-6680  
 BN 978-3-03785-661-1  
 J9 ADV MATER RES-SWITZ  
 PY 2013  
 VL 671-674  
 BP 2129  
 EP +  
 DI 10.4028/www.scientific.net/AMR.671-674.2129  
 PG 2  
 WC Construction & Building Technology; Engineering, Civil; Materials  
 Science, Multidisciplinary  
 SC Construction & Building Technology; Engineering; Materials Science  
 GA BGJ02  
 UT WOS:000323185101097  
 DA 2018-05-03  
 ER

PT S  
 AU Lu, HW  
 Gong, HW  
 AF Lu Hongwei  
 Gong Hongwei  
 BE Wang, A  
 Che, LK  
 Dong, R  
 Zhao, G

TI An analysis of the seasonal energy consumption of culture and education  
 comprehensive building  
 SO APPLIED ENERGY TECHNOLOGY, PTS 1 AND 2  
 SE Advanced Materials Research  
 LA English  
 DT Proceedings Paper  
 CT 2nd International Conference on Energy and Environmental Protection  
 (ICEEP 2013)  
 CY APR 19-21, 2013  
 CL Guilin, PEOPLES R CHINA  
 SP Inner Mongolia Univ, Chinese Acad Sci, Res Ctr Eco Environm Sci, Key Lab Environm Biotechnol  
 DE Comprehensive building; analysis of energy consumption; itemized energy

consumption

AB Through a comparative analysis, this paper attempts to summarize the hourly variations of the total energy consumptions and itemized energy consumptions in a culture and education comprehensive building in summer, winter, and the transitional season. The results show a great difference in energy consumptions in the same building in different seasons. Energy consumption is highest in winter. There is a minor difference in energy consumptions between a typical day in summer vacation and a normal work day in summer. The lowest energy consumption is in winter vacation, but a typical day in winter vacation would still consume about half of the energy consumed on a normal working day in winter.

C1 [Lu Hongwei] Jiangsu Prov Dept Construct Sci & Technol Dev Ctr, Nanjing, Jiangsu, Peoples R China.

[Gong Hongwei] Nanjing Univ Sci & Technol, Nanjing, Jiangsu, Peoples R China.

RP Lu, HW (reprint author), Jiangsu Prov Dept Construct Sci & Technol Dev Ctr, Nanjing, Jiangsu, Peoples R China.

CR PAN Hang, 2011, J METEOROLOGICAL SCI, V31, P742

Meijuan Zhao, 2008, CHINA CONSTRUCTION M, P11

NR 2

TC 0

Z9 0

U1 0

U2 0

PU TRANS TECH PUBLICATIONS LTD

PI DURNTEN-ZURICH

PA KREUZSTRASSE 10, 8635 DURNTEN-ZURICH, SWITZERLAND

SN 1022-6680

BN 978-3-03785-741-0

J9 ADV MATER RES-SWITZ

PY 2013

VL 724-725

BP 874

EP +

DI 10.4028/www.scientific.net/AMR.724-725.874

PG 2

WC Construction & Building Technology; Energy & Fuels; Transportation  
Science & Technology

SC Construction & Building Technology; Energy & Fuels; Transportation

GA B JL87

UT WOS:000328999700162

DA 2018-05-03

ER

PT B

AU Simanaviciene, Z

Volochovic, A

Giziene, V

AF Simanaviciene, Zaneta

Volochovic, Andzej

Giziene, Vilda

GP EBES

TI ENERGY BEHAVIOUR IN HOUSEHOLDS: BASIC PATTERNS OF BEHAVIOR AND THEIR  
IMPACT ON ENERGY SAVINGS IN HOUSEHOLDS

SO PROCEEDINGS OF THE 11TH EURASIA BUSINESS AND ECONOMICS SOCIETY  
CONFERENCE (EBES)

LA English

DT Proceedings Paper

CT 11th Conference of the Eurasia-Business-and-Economics-Society (EBES)

CY SEP 12-14, 2013

CL Russian Acad Sci, Inst Econ, Ural Branch, Ekaterinburg, RUSSIA

SP Eurasia Business & Econ Soc

HO Russian Acad Sci, Inst Econ, Ural Branch

DE Behavior; Households; Energy Savings; Impact  
 ID CLIMATE-CHANGE; PLANNED BEHAVIOR; CONSERVATION; POWER; INTERVENTION;  
 PREFERENCES; EFFICIENCY; ECONOMICS; ATTITUDES; POLICIES

AB Over the last three decades, energy savings in households is recognized as very relevant and important research topics by different authors. At present, the development of science in the world economy plays an important role in behavioral economics research for irrational market behavior insights. Behavioral changes primarily related to the implementation of the principles of sustainable consumption. The objective of this paper is to examine behavioral concepts, modeling them from the energy perspective, conveying them to show the behavior of links with energy consumption, developing patterns of behavior reprehensible. Studies have shown that behavior can affect and attitude in certain situations. The analysis of studies dealing with behavioral patterns revealed that the patterns of behavior overcame some of the cultural theory ideas, and stressed that the different environmental policy choices require hierarchical (preferred by traditions or institutions) or individual (preference for innovation and individual choice) types option. All of these theories and models have certain limitations, and to develop energy saving potential in changing people's behavior, the evaluation model is necessary to take advantage of all of these theories strengths and to pay attention to their limitations.

C1 [Simanaviciene, Zaneta; Volochovic, Andzej; Giziene, Vilda] Kaunas Univ Technol, Fac Econ & Management, Kaunas, Lithuania.

EM zaneta.simanaviciene@ktu.lt; a.volochovicius@gmail.com;  
 vilda.giziene@ktu.lt

CR Abrahamse W, 2005, J ENVIRON PSYCHOL, V25, P273, DOI 10.1016/j.jenvp.2005.08.002

Abrahamse W, 2007, J ENVIRON PSYCHOL, V27, P265, DOI 10.1016/j.jenvp.2007.08.002

Abrahamse W, 2009, J ECON PSYCHOL, V30, P711, DOI 10.1016/j.joep.2009.05.006

AJZEN I, 1991, ORGAN BEHAV HUM DEC, V50, P179, DOI 10.1016/0749-5978(91)90020-T

Ajzen I., 1980, UNDERSTANDING ATTITU

Akerlof GA, 2009, ANIMAL SPIRITS: HOW HUMAN PSYCHOLOGY DRIVES THE ECONOMY, AND WHY IT MATTERS FOR GLOBAL CAPITALISM, P1

Andersen H., 1983, INDUSTRIAL ORGANIZAT, V1, P287

Bamberg S, 2003, ENVIRON BEHAV, V35, P264, DOI 10.1177/0013916502250134

Bandura A., 1977, SOCIAL LEARNING THEO

Barnett WA, 2008, J ECONOMETRICS, V147, P210, DOI 10.1016/j.jeconom.2008.09.009

Benders RMT, 2006, ENER POLICY, V34, P3612, DOI 10.1016/j.enpol.2005.08.005

Blumer H., 1969, SYMBOLIC INTERACTION

Borchers AM, 2007, ENER POLICY, V35, P3327, DOI 10.1016/j.enpol.2006.12.009

Brekke KA, 2008, OXFORD REV ECON POL, V24, P280, DOI 10.1093/oxrep/grn012

Darby S., 2006, THE EFFECTIVENESS OF

Ek K, 2005, ENER POLICY, V33, P1677, DOI 10.1016/j.enpol.2004.02.005

Faiers A, 2006, ENER POLICY, V34, P1797, DOI 10.1016/j.enpol.2005.01.001

Faruqui A., 2009, ENERGY, V35, P1598

Garmendia E, 2010, ECOL ECON, V69, P1712, DOI 10.1016/j.ecolecon.2010.03.027

Girod B, 2009, ENER POLICY, V37, P5650, DOI 10.1016/j.enpol.2009.08.026

Godwy J. M., 2007, RENSSLAER WORKING P, P0701

GUAGNANO GA, 1995, ENVIRON BEHAV, V27, P699, DOI 10.1177/0013916595275005

Hamid L., 2007, WORLD ECON, V8, P169

HOMANS GC, 1961, SOCIAL BEHAVIOR ITS

Hovland CI, 1953, COMMUNICATION AND PE

Koppl R, 2004, J ECON BEHAV ORGAN, V55, P295, DOI 10.1016/j.jebo.2003.07.006

Lutzenhiser L., 2009, BEHAVIORAL ASSUMPTIO

Maibach EW, 2008, AM J PREV MED, V35, P488, DOI 10.1016/j.amepre.2008.08.016

Marechal K, 2007, ENER POLICY, V35, P5181, DOI 10.1016/j.enpol.2007.05.009

MEAD GH, 1934, MIND SELF AND SOCIET

Oikonomou V, 2009, ENER POLICY, V37, P4787, DOI 10.1016/j.enpol.2009.06.035

Poortinga W, 2003, J ECON PSYCHOL, V24, P49, DOI 10.1016/S0167-4870(02)00154-X

Reusswig F., 2010, SUSTAINABLE PRODUCTI, P13

Roberts S., 2003, TOWARDS EFFECTIVE EN

Schiller S.R., 2008, ENERGY EFFICIENCY AN

Steg L, 2005, J ENVIRON PSYCHOL, V25, P415, DOI 10.1016/j.jenvp.2005.08.003

Steg L, 2008, ENER POLICY, V36, P4449, DOI 10.1016/j.enpol.2008.09.027

Stern PC, 2000, J SOC ISSUES, V56, P407, DOI 10.1111/0022-4537.00175  
 Streimikiene D., 2008, ENERGETIKA, V54, P62  
 Streimikiene D, 2012, RENEW SUST ENERG REV, V16, P3613, DOI 10.1016/j.rser.2012.02.045  
 Tonglet M, 2004, RESOUR CONSERV RECY, V41, P191, DOI 10.1016/j.resconrec.2003.11.001  
 Triandis H., 1977, INTERPERSONAL BEHAVI  
 Ueno T., 2005, EFFECTIVENESS OF DIS  
 Wicklund R. A., 1982, SYMBOLIC SELF COMPLE  
 Zarnikau J, 2003, ENERG POLICY, V31, P1661, DOI 10.1016/S0301-4215(02)00232-X  
 [Anonymous], 2009, FINAL REPORT

NR 46

TC 0

Z9 0

U1 2

U2 5

PU EURASIAN BUSINESS & ECONOMICS SOC

PI ISTANBUL

PA AKSEMSETTIN MAH KOCASINAN CAD NO 8-4, ISTANBUL, FATIH 34080, TURKEY

BN 978-605-64002-3-0

PY 2013

BP 216

EP 226

PG 11

WC Business; Business, Finance; Economics

SC Business & Economics

GA BA4MA

UT WOS:000336000900019

DA 2018-05-03

ER

PT S

AU Su, MF

Guo, H

AF Su, Minfang

Guo, Hong

BE Yang, W

Liang, JG

TI Energy-saving renovation in existing high-rise residential building

SO SUSTAINABLE DEVELOPMENT AND ENVIRONMENT II, PTS 1 AND 2

SE Applied Mechanics and Materials

LA English

DT Proceedings Paper

CT 2nd International Conference on Civil, Architectural and Hydraulic

Engineering (ICCAHE 2013)

CY JUL 27-28, 2013

CL Zhuhai, PEOPLES R CHINA

DE High-rise residential building; Energy-saving renovation; Energy efficiency; Building envelope

AB Based on the structure feature and energy consumption situation of high-rise reinforced concrete residential buildings which built in end of last century, it discussed the main energy-saving renovation technologies and methods. Demonstrating high-rise reinforced concrete residential building of Taiyuan as a case, it analyzed its heat loss problems and defects of original design. Energy-saving renovation plan proposed and put reconstruction technologies of building envelope and heating system in practice. It discusses energy-saving renovation effects, energy efficiency. Indoor thermal environment improved significantly after energy-saving renovation on building envelope and heat system.

C1 [Su, Minfang] Inst Shanxi Architectural Design & Res, Taiyuan 030013, Shanxi, Peoples R China.

[Guo, Hong] North Univ China, Dept Civil Engr, Taiyuan 030051, Shanxi, Peoples R China.

RP Su, MF (reprint author), Inst Shanxi Architectural Design & Res, Taiyuan 030013, Shanxi, Peoples R China.

EM guohongh@126.com; guohongh2@163.com

CR An Yanhua, J SHENYANG JIANZHU U, V12  
 The Bureau of Construction of Shanxi, 2006, DBJ042432006  
 Gu Pingdao, BUILDING EFFICIENCY, V3  
 Guo H, 2011, ADV MATER RES-SWITZ, V142, P1  
 Ministry of Construction of the People's Republic of China, 2006, 503782006 GBT MIN CO

NR 5  
 TC 0  
 Z9 0  
 U1 1  
 U2 6  
 PU TRANS TECH PUBLICATIONS LTD  
 PI DURNTEN-ZURICH  
 PA KREUZSTRASSE 10, 8635 DURNTEN-ZURICH, SWITZERLAND  
 SN 1660-9336  
 BN 978-3-03785-858-5  
 J9 APPL MECH MATER  
 PY 2013  
 VL 409-410  
 BP 526  
 EP +  
 DI 10.4028/www.scientific.net/AMM.409-410.526  
 PG 2  
 WC Engineering, Civil; Engineering, Mechanical; Environmental Sciences  
 SC Engineering; Environmental Sciences & Ecology  
 GA BA4VI  
 UT WOS:000336337400101  
 DA 2018-05-03  
 ER

PT B  
 AU Tong, QG  
 Liu, J  
 AF Tong Qing-gui  
 Liu Jing  
 GP IEEE  
 TI Adaptability Analysis of Passive Building Energy Efficiency Technology  
 in Hot Summer and Warm Winter Region  
 SO 2013 FOURTH INTERNATIONAL CONFERENCE ON INTELLIGENT SYSTEMS DESIGN AND  
 ENGINEERING APPLICATIONS  
 LA English  
 DT Proceedings Paper  
 CT 4th International Conference on Intelligent Systems Design and  
 Engineering Applications (ISDEA)  
 CY NOV 06-07, 2013  
 CL Zhangjiajie, PEOPLES R CHINA  
 SP Cent S Univ, St Johns Univ, Hunan Univ Technol, Dept Elect Sci & Technol, Natl Univ Defense Technol,  
 Intelligent Computat Technol & Automat Soci  
 DE Hot summer and warm winter; Passive technologies; Energy efficiency;  
 Adaptability analysis  
 AB Passive building energy efficiency refers to utilizing ecological building design principles with natural  
 climate resources to realize building energy efficiency, which is greener, more conducive to the sustainable  
 development of the human living environment, and will actively advocate building energy efficiency. This  
 paper will analysis the adaptability of six passive building energy efficiency technologies including passive  
 solar heating, natural ventilation, thermal storage wall, induced and night ventilation, direct evaporative  
 cooling and indirect evaporative cooling in typical cities of Shenzhen and Guangzhou in hot summer and  
 cold winter region. In addition, this paper will establish adaptability model of passive building energy  
 efficiency technology. According to the adaptability model, appropriate passive building energy efficiency  
 technologies can be analyzed in typical cities in hot summer and cold winter region.

C1 [Tong Qing-gui] Chongqing Univ, Coll Urban Construct & Environm Engrn, Chongqing 400044, Peoples R China.

[Liu Jing] Construct Qual Supervis, Chongqing Chief Stn Engrn, Chongqing PT-400014, Peoples R China.

RP Tong, QG (reprint author), Chongqing Univ, Coll Urban Construct & Environm Engrn, Chongqing 400044, Peoples R China.

EM qingguitong@126.com

FU NSFC [51108473]; MOE [20110191120036]

FX The work has been support by China NSFC project (51108473) and Doctoral Program Funding of MOE (20110191120036).

CR Fu Xiangzhao, CHIN INT BUILD EN EF

Fu Xiangzhao, 2002, ENERGY EFFICIENCY TE

Makun, 2011, ENERGY ENERGY EFFICL, P25

Zhuo Jinmian, 2012, FUJIAN CONSTRUCTION, V2, P60

NR 4

TC 0

Z9 0

U1 1

U2 1

PU IEEE

PI NEW YORK

PA 345 E 47TH ST, NEW YORK, NY 10017 USA

BN 978-1-4799-2791-3

PY 2013

BP 64

EP 68

DI 10.1109/ISDEA.2013.421

PG 5

WC Computer Science, Artificial Intelligence; Computer Science, Information Systems; Computer Science, Software Engineering

SC Computer Science

GA BB7ZJ

UT WOS:000346143900016

DA 2018-05-03

ER

PT B

AU Tundo, A

Lassandro, P

Galietti, U

AF Tundo, Antonella

Lassandro, Paola

Galietti, Umberto

BE Hajek, P

Tywoniak, J

Lupisek, A

Sojkova, K

TI IMPROVING ENVIRONMENTAL COMFORT AND ENERGY SAVING IN SCHOOL BUILDINGS: A CASE STUDY WITH THE STUDENTS' PARTICIPATION

SO SUSTAINABLE BUILDING AND REFURBISHMENT FOR NEXT GENERATIONS

LA English

DT Proceedings Paper

CT Conference on Central Europe towards Sustainable Building (CESB13)

CY JUN 26-28, 2013

CL Prague, CZECH REPUBLIC

SP Czech Tech Univ, Fac Civil Engrn, iiSBE, UNEP, CIB, FIDIC

DE Retrofitting; energy-saving; thermography; comfort; participation

AB The study seeks to develop a replicable procedure in relation to environmental parameters of objective and subjective comfort perception, both through the use of dedicated Information Technologies and



diagnostic instrumental methods (thermal and lighting audit) and assessment data collected from users (students and teachers), actively participating in the quality judgment. The involvement of students is intended to increase their awareness towards sustainable building issues and the adoption of behaviours aimed at saving energy and improving comfort conditions.

C1 [Tundo, Antonella] ENEA, UTEE Italian Natl Agcy New Technol, Energy & Sustainable Econ Dev Tech Unit Energy Ef, Viale Japigia 188, I-70126 Bari, Italy.  
 [Lassandro, Paola] Italian Natl Res Council, ITC, CNR Construct Technol Inst, I-70124 Bari, Italy.  
 [Galietti, Umberto] Politecn Bari, DMMM, I-70126 Bari, Italy.

RP Tundo, A (reprint author), ENEA, UTEE Italian Natl Agcy New Technol, Energy & Sustainable Econ Dev Tech Unit Energy Ef, Viale Japigia 188, I-70126 Bari, Italy.  
 EM antonella.tundo@enea.it; paola.lassandro@itc.cnr.it; galietti@poliba.it  
 RI Galietti, Umberto/L-1545-2016  
 OI Galietti, Umberto/0000-0001-8725-5927; LASSANDRO, PAOLA/0000-0001-6611-2820  
 CR [Anonymous], 2011, ADV EN DES GUID K 12  
 [Anonymous], 2004, EU PROJ  
 TELI D., 2012, P 7 WINDS C CLANG CO

NR 3  
 TC 0  
 Z9 0  
 U1 1  
 U2 5  
 PU CZECH TECHNICAL UNIV PRAGUE  
 PI PRAGUE 6  
 PA ZIKOVA 4, PRAGUE 6 166 35, CZECH REPUBLIC  
 BN 978-80-247-5015-6  
 PY 2013  
 BP 863  
 EP 866  
 PG 4  
 WC Architecture; Construction & Building Technology; GREEN & SUSTAINABLE SCIENCE & TECHNOLOGY; Engineering, Civil; Urban Studies  
 SC Architecture; Construction & Building Technology; Science & Technology - Other Topics; Engineering; Urban Studies  
 GA BE4FL  
 UT WOS:000371647300213  
 DA 2018-05-03  
 ER

PT S  
 AU Wang, YZ  
 Juang, LH  
 Liu, WH  
 AF Wang, Yi-Zi  
 Juang, Li-Hong  
 Liu, Wen-Hua  
 BE Kao, JCM  
 Sung, WP  
 Chen, R  
 TI A New Design Concept by Using BIM for Reforming an Energy-saving Campus Building  
 SO FRONTIERS OF GREEN BUILDING, MATERIALS AND CIVIL ENGINEERING III, PTS 1-3  
 SE Applied Mechanics and Materials  
 LA English  
 DT Proceedings Paper  
 CT 3rd International Conference on Green Building, Materials and Civil Engineering (GBMCE 2013)

CY AUG 21-23, 2013

CL Taiwan, PEOPLES R CHINA

SP Natl Chin Yi Univ Technol, Natl Cheng Kung Univ, Natl Sun Yan Sen Univ, Natl Chi Nun Univ,  
ChienKuo Technol Univ, Control Engn & Informat Sci Res Assoc, Int Frontiers Sci & Technol Res Assoc,  
Trans Tech Publicat

DE BIM(Building Information Modeling); Green building; Energy-saving;  
Reform

AB Firstly, this article induces out the theme of reforming the energy-saving of campus buildings through the current situation about huge energy consumption from campus construction. Secondly, taking the buildings of Shantou University's "Engineering Institute, CDIO innovation center" as an example and combining BIM(Building Information Modeling) with green building come up with every green reform strategy we will use to reach the purpose that changing the current building into a kind of better building which is water-saving, electricity-saving, ventilation and heat protection. Finally, we will make a conclusion that combining BIM with green building is a good way to make a feasible design for guide construction.

C1 [Wang, Yi-Zi; Juang, Li-Hong; Liu, Wen-Hua] Shantou Univ, Dept Civil Engn, Shantou, Guangdong, Peoples R China.

RP Wang, YZ (reprint author), Shantou Univ, Dept Civil Engn, Shantou, Guangdong, Peoples R China.

EM yzwang@stu.edu.cn; lhzhuang@stu.edu.cn; 12whliu@stu.edu.cn

CR Liu Chao, 2011, J GREEN BUILD, V4, P48

Pei Xiang-Yu, 2011, J POPULAR SCI, V1, P65

Song Zhen-Ning, 2012, J SCI TECHNOLOGY ASS, V9, P131

Sun Zhong, 2011, J JIANG SU CONSTRUCT, V5, P100

[??? ZENG Xudong], 2006, [????????], Journal of Chongqing Jianzhu University], V28, P33

NR 5

TC 0

Z9 0

U1 0

U2 7

PU TRANS TECH PUBLICATIONS LTD

PI STAFA-ZURICH

PA LAUBLSRUTISTR 24, CH-8717 STAFA-ZURICH, SWITZERLAND

SN 1660-9336

BN 978-3-03785-792-2

J9 APPL MECH MATER

PY 2013

VL 368-370

BP 1191

EP 1195

DI 10.4028/www.scientific.net/AMM.368-370.1191

PG 5

WC Construction & Building Technology; Environmental Sciences

SC Construction & Building Technology; Environmental Sciences & Ecology

GA BA9HV

UT WOS:000339411600238

DA 2018-05-03

ER

PT S

AU Yu, FQ

Tian, B

Zhang, X

Wang, Q

Yu, DS

Zhao, R

AF Yu, Fengqin

Tian, Bei

Zhang, Xin

Wang, Qiang  
Yu, Danshi  
Zhao, Rang  
BE Tang, X  
Chen, X  
Dong, Y  
Wei, X  
Yang, Q

TI Perception and Management System for Building Energy Consumption Based  
on Internet of Things Technology

SO ADVANCES IN ENERGY SCIENCE AND TECHNOLOGY, PTS 1-4

SE Applied Mechanics and Materials

LA English

DT Proceedings Paper

CT International Conference on Sustainable Energy and Environmental  
Engineering (ICSEEE 2012)

CY DEC 29-30, 2012

CL Guangzhou, PEOPLES R CHINA

SP Guangdong Univ Business Studies

DE Energy-saving Buildings; Building Energy Consumption; Internet of  
Things; Energy Consumption Perception; Energy Consumption Monitoring;  
Energy Consumption Management

AB The building energy consumption is one of three in China's energy consumption, the detection and monitoring for energy consumption of building is the basis for the work of building energy efficiency. This article describes a perception, monitoring and management system of building energy consumption based on Internet of Things technology architecture, in the system, various energy instrumentation is installed inside the building and measurement all kinds of energy consumption data in the perception layer, collection dateterminal data connected to the RS485 bus access gateway for data transmission via Ethernet or mobile communication network in the network layer and transport layer, deal with the statistical analysis of the energy consumption data in the application layer. The system has been successfully applied to more than 50 large-scale public building to implement energy consumption monitoring and management, and the support of the underlying data for building energy efficiency.

C1 [Yu, Fengqin; Tian, Bei; Zhang, Xin; Wang, Qiang; Yu, Danshi; Zhao, Rang] Jiangnan Univ, Jiangnan Energy Res Inst, Internet Things Engn Coll, Wuxi City 214122, Jiangsu, Peoples R China.

RP Yu, FQ (reprint author), Jiangnan Univ, Jiangnan Energy Res Inst, Internet Things Engn Coll, 1800 Lihu Rd, Wuxi City 214122, Jiangsu, Peoples R China.

EM yufq@jiangnan.edu.cn

CR [Anonymous], DLT4482000

[Anonymous], GB501892005

[Anonymous], GBJ6390

NR 3

TC 0

Z9 0

U1 2

U2 11

PU TRANS TECH PUBLICATIONS LTD

PI STAFA-ZURICH

PA LAUBLSRUTISTR 24, CH-8717 STAFA-ZURICH, SWITZERLAND

SN 1660-9336

BN 978-3-03785-634-5

J9 APPL MECH MATER

PY 2013

VL 291-294

BP 945

EP 948

DI 10.4028/www.scientific.net/AMM.291-294.945

PG 4

WC Energy & Fuels; Materials Science, Multidisciplinary

SC Energy & Fuels; Materials Science  
 GA BFM20  
 UT WOS:000320478400179  
 DA 2018-05-03  
 ER

PT S

AU Zhong, M  
 Chen, SS  
 Wang, H  
 Yan, HG

AF Zhong, Ming  
 Chen, Songsong  
 Wang, He  
 Yan, Huaguang

BE Zhang, XD  
 Li, HN  
 Feng, X  
 Chen, Z

TI The interaction and monitoring system for energy saving in building  
 SO SUSTAINABLE DEVELOPMENT OF URBAN INFRASTRUCTURE, PTS 1-3  
 SE Applied Mechanics and Materials

LA English

DT Proceedings Paper

CT 2nd International Conference on Civil Engineering and Transportation  
 (ICCET 2012)

CY OCT 27-28, 2012

CL Guilin, PEOPLES R CHINA

SP Liaoning Tech Univ, Hong Kong Ind Technol Res Ctr

DE wireless sensor; energy saving; monitoring; energy services company;  
 energy saving and emission reduction

AB The continuous advance of the policy about 'Energy saving and emission reduction', along with the continuous development of information technology, control technology, which bring profitable conditions for the monitoring and control over the building (here mainly refers to the large building of government, commercial or industrial user). In particular, a interaction and monitoring system is proposed, which is used to monitor the parameters about energy consumption of energy consumption system or equipment inside the building, in addition the information about the running of the energy consumption system or equipment. At the same time, the relevant units of the energy consumption system or equipment is controlled by the interaction and monitoring system. The interaction and monitoring system for energy saving in building consists of the node for energy saving and monitoring, wireless sensor network (hereinafter referred to as WSN), the platform for energy saving and monitoring, making up the three-layer structure of the interaction and monitoring system inside the building. The node for energy saving and monitoring is a wireless sensor actually, which plays the role as collecting data and controlling. Along with the other nodes for energy saving and monitoring, as well as the nodes acting as repeater, router, coordinator, all nodes inside the building compose the WSN. The node acting as the repeater is of great significance for the transmission of data, especially when some nodes for energy saving and monitoring is located in underground building and some other places where the signal of WSN is blocked, as well as the places far away from the neighbor nodes of WSN. The coordinator is located on the platform for energy saving and monitoring, meanwhile the function of gateway is integrated in the node acting as the coordinator. This node converge the data of the WSN, and transfers the data to the server of the platform for energy saving and monitoring.

C1 [Zhong, Ming; Wang, He; Yan, Huaguang] China Elect Power Res Inst, Beijing 100192, Peoples R China.

[Chen, Songsong] North China Elect Power Univ, Sch Elect & Elect Engr, Beijing 102206, Peoples R China.

RP Zhong, M (reprint author), China Elect Power Res Inst, Beijing 100192, Peoples R China.

EM zhongm@epri.sgcc.com.cn; chen\_songsong@sina.com;  
 wanghe@epri.sgcc.com.cn; hgyan@epri.sgcc.com.cn

CR Arumugam AK, 2002, IEEE T CONSUM ELECTR, V48, P754, DOI 10.1109/TCE.2002.1037071  
 Chakrabarti S., 2010, 2010 INT COMP S ICS, P435

- Corucci F., 2011, 2011 IEEE Symposium on Computers and Communications (ISCC 2011), P990, DOI 10.1109/ISCC.2011.5983971
- Corucci F., 2011, 2011 INT C CIV ENG T, P631
- Zhiyu Huangl, 2011, 2011 10 IEEE INT C C, P324
- Jung C.K., 2009, J AUTOMATION TECHNOL, P54
- Jung J.Y., 2008, P 10 INT C ADV COMM, P795
- Luo QB, 2009, CCDC 2009: 21ST CHINESE CONTROL AND DECISION CONFERENCE, VOLS 1-6, PROCEEDINGS, P3622, DOI 10.1109/CCDC.2009.5192836
- Si Wa, 2011, IEEJ T ELECT INFORM, V131, P1298
- Sun Jianmin, 2012, Proceedings of the 2012 Second International Conference on Intelligent System Design and Engineering Application (ISDEA), P1003, DOI 10.1109/ISdea.2012.497
- Wang Bo, 2011, 2011 Second International Conference on Mechanic Automation and Control Engineering, P3613
- Wang Ruozhu, 2012, 4 INT C TECHN ARCH S, P374

NR 12

TC 0

Z9 0

U1 0

U2 4

PU TRANS TECH PUBLICATIONS LTD

PI DURNTEN-ZURICH

PA KREUZSTRASSE 10, 8635 DURNTEN-ZURICH, SWITZERLAND

SN 1660-9336

BN 978-3-03785-564-5

J9 APPL MECH MATER

PY 2013

VL 253-255

BP 724

EP +

DI 10.4028/www.scientific.net/AMM.253-255.724

PN 1-3

PG 2

WC Engineering, Civil

SC Engineering

GA BFD17

UT WOS:000319231600142

DA 2018-05-03

ER

PT S

AU Bai, W

Long, WD

AF Bai, Wei

Long, Weiding

BE Ren, N

Che, LK

Jin, B

Dong, R

Su, H

TI Potentials Analysis of Carbon Mitigation and Energy Consumption

Reduction of Shanghai Non-Residential Buildings

SO RENEWABLE AND SUSTAINABLE ENERGY II, PTS 1-4

SE Advanced Materials Research

LA English

DT Proceedings Paper

CT 1st International Conference on Energy and Environmental Protection (ICEEP 2012)

CY JUN 23-24, 2012

CL Hohhot, PEOPLES R CHINA

SP Inner Mongolia Univ

DE building energy use; carbon emission; scenario analysis; system dynamic simulation

AB The aim of this study is to analyze the potentials of energy consumption and the energy-related carbon reduction of Shanghai non-residential buildings, to discuss the contributions of positive policies. This study uses system dynamic tool to examine the behaviour of the complex social-economic-energy system over time. This study defines three types of scenarios, BAU (business-as-usual), reference and ambitious scenarios in which policies on sustainability and technology progress are different. In order to highlight the importance of policies, this study adds several sub-scenarios and compares the contributions of them. The results show that Shanghai can reduce by at most 22% of building energy use and 30.9% of the energy-related carbon emissions by 2020 on the 2005 baseline. The strong economic incentives, including both encouraging and punishment measures are quite helpful for Shanghai building energy efficiency and CO<sub>2</sub> reduction.

C1 [Bai, Wei; Long, Weiding] Tongji Univ, Sino German Sch Appl Sci, Shanghai 200092, Peoples R China.

RP Bai, W (reprint author), Tongji Univ, Sino German Sch Appl Sci, Shanghai 200092, Peoples R China.

EM baiweitj@gmail.com

CR Bai W., 2008, THESIS TONGJI U

Forrester JW., 1961, IND DYNAMICS

Metz B, 2007, CLIMATE CHANGE 2007

Varoolu Demet, 1997, P 15 INT C SYST DYN

[Anonymous], 1987, A42427 WORLD COMM EN

NR 5

TC 0

Z9 0

U1 0

U2 3

PU TRANS TECH PUBLICATIONS LTD

PI STAFA-ZURICH

PA LAUBLSRUTISTR 24, CH-8717 STAFA-ZURICH, SWITZERLAND

SN 1022-6680

BN 978-3-03785-414-3

J9 ADV MATER RES-SWITZ

PY 2012

VL 512-515

BP 2766

EP 2774

DI 10.4028/www.scientific.net/AMR.512-515.2766

PG 9

WC Energy & Fuels; Materials Science, Multidisciplinary

SC Energy & Fuels; Materials Science

GA BCZ11

UT WOS:000312119901241

DA 2018-05-03

ER

PT S

AU Fang, TY

Chen, J

Fang, MX

Wang, J

AF Fang, Tingyong

Chen, Jun

Fang, Meixiang

Wang, Jing

BE Yang, WJ

TI Research of the Building Energy Efficiency Data Analysis Based on Time Series Algorithm in Anhui Province, China

SO SUSTAINABLE CITIES DEVELOPMENT AND ENVIRONMENT, PTS 1-3

SE Applied Mechanics and Materials

LA English

DT Proceedings Paper

CT International Conference on Civil, Architectural and Hydraulic  
Engineering (ICCAHE 2012)

CY AUG 10-12, 2012

CL Zhangjiajie, PEOPLES R CHINA

SP Changsha Univ Sci & Technol, Hunan Univ, Xiangtan Univ, Nanhua Univ, Hunan Univ Sci & Technol,  
Hunan City Univ

DE Time series algorithm; Building energy efficiency; Exponential  
smoothing; Energy consumption; Energy saving

ID HONG-KONG

AB Nowadays the researches of building energy efficiency mainly focus on the development of the related technologies and management measures, but the regional policy EIA have a greater impact on the development of building energy efficiency in China. In this paper, the statistical data combined with the actual situation of building energy efficiency during the period of the Eleventh-Five-Year in Anhui Province, China. Use exponential smoothing method of time series algorithm for forecast and analysis of building energy consumption and energy saving in Anhui Province. First, take six different values as the exponential smoothing constants, the predictive values are calculated under the different exponential smoothing constants. Then compare and analyze the curves through the errors between the predictive values and the actual values, and determine the group of the curves of which the trend closest to the trend of actual values. For the actual data are affected by many kinds of factors that exist fluctuations, the method for predictive values correction was put forward. Using the trend extrapolation, the predictive values is corrected. Also provides theoretical guidance for the future work in Anhui Province and other similar places.

C1 [Fang, Tingyong; Chen, Jun; Fang, Meixiang; Wang, Jing] Minist Educ, Engn Res Ctr Bldg Energy Efficient Control & Eval, Hefei 230022, Anhui, Peoples R China.

RP Fang, TY (reprint author), Minist Educ, Engn Res Ctr Bldg Energy Efficient Control & Eval, Hefei 230022, Anhui, Peoples R China.

EM fangtingyong@126.com; alvincj@126.com; fangming19871003@126.com;  
aywj8844@126.com

CR Cena K, 2001, J THERM BIOL, V26, P409, DOI 10.1016/S0306-4565(01)00052-3

Diakaki C, 2008, ENERGBUILDINGS, V40, P1747, DOI 10.1016/j.enbuild.2008.03.002

Escriva-Escriva G, 2011, ENERGBUILDINGS, V43, P3106, DOI 10.1016/j.enbuild.2011.08.006

Fong KF, 2012, APPL ENERGBUILDINGS, V90, P189, DOI 10.1016/j.apenergy.2011.06.013

Gustavsson L, 2011, ENERGBUILDINGS, V43, P38, DOI 10.1016/j.enbuild.2010.07.029

Hong TZ, 2009, ENERGBUILDINGS, V41, P426, DOI 10.1016/j.enbuild.2008.11.003

Lee WL, 2008, BUILD ENVIRON, V43, P1882, DOI 10.1016/j.buildenv.2007.11.007

Liang J, 2007, ENERGBUILDINGS, V39, P1098, DOI 10.1016/j.enbuild.2006.12.002

Newsham GR, 2009, ENERGBUILDINGS, V41, P897, DOI 10.1016/j.enbuild.2009.03.014

Yik FWH, 1998, ENERGBUILDINGS, V27, P207, DOI 10.1016/S0378-7788(97)00037-6

You J, 2011, RENEW SUST ENERGBUILDINGS, V15, P2984, DOI 10.1016/j.rser.2011.03.026

NR 11

TC 0

Z9 0

U1 0

U2 3

PU TRANS TECH PUBLICATIONS LTD

PI STAFA-ZURICH

PA LAUBLSRUTISTR 24, CH-8717 STAFA-ZURICH, SWITZERLAND

SN 1660-9336

BN 978-3-03785-485-3

J9 APPL MECH MATER

PY 2012

VL 209-211

BP 1836

EP 1842

DI 10.4028/www.scientific.net/AMM.209-211.1836

PN 1-3

PG 7

WC Engineering, Environmental; Engineering, Civil

SC Engineering

GA BFD16

UT WOS:000319231001081

DA 2018-05-03

ER

PT S

AU Gravouniotis, P

Bauen, A

Pearson, P

AF Gravouniotis, Paris

Bauen, Ausilio

Pearson, Peter

BE Salame, C

Aillerie, M

Khoury, G

TI Building markets for energy saving equipment and modelling subsidy strategies in tourism dependent economies

SO TERRAGREEN 2012: CLEAN ENERGY SOLUTIONS FOR SUSTAINABLE ENVIRONMENT (CESSE)

SE Energy Procedia

LA English

DT Proceedings Paper

CT International Conference on Clean Energy Solutions for Sustainable Environment (TerraGreen)

CY FEB 16-19, 2012

CL Beirut, LEBANON

DE technology diffusion; subsidies; tourism; energy saving; learning curve; islands; Greece; System Dynamics

AB The paper presents selected results of a dynamic non-linear model that simulates critical factors in the diffusion of demand-side energy saving equipment. The modelling exercise is customised to the particular characteristics of the Greek islands of the Aegean Sea. Through a sample set of alternative diffusion scenarios, it tests socio-economic and techno-economic system behaviour providing helpful insights in market development and programme design in the wider energy policy debate on effective introduction of new technology. The paper discusses the usefulness of simulation modelling along critical interactions and feedbacks among policy makers (government), the utility operator, consumers and the adopters. (C) 2012 Published by Elsevier Ltd. Selection and/or peer review under responsibility of The TerraGreen Society

C1 [Gravouniotis, Paris; Bauen, Ausilio] Univ London Imperial Coll Sci Technol & Med, Ctr Environm Policy, London SW7 2AZ, England.

[Pearson, Peter] Cardiff Univ, Welsh Sch Architecture, Cardiff CF10 3AX, S Glam, Wales.

RP Gravouniotis, P (reprint author), Univ London Imperial Coll Sci Technol & Med, Ctr Environm Policy, London SW7 2AZ, England.

EM p.gravouniotis01@imperial.ac.uk

RI Pearson, Peter/I-7144-2012

CR Betzios G., 2003, CRET GREEC EREC INT, P45

Betzios G., 2003, COMMUNICATION 0219

Gravouniotis P., 2008, P 26 INT C SYST DYN

HTSO, 2008, DEV PLAN EL IN PRESS

ICAP, 2008, SECT REV AIR COND UN

[Anonymous], 2008, C EN PROBL CYCL CRIT

Kaldellis JK, 2007, ENERG POLICY, V35, P4623, DOI 10.1016/j.enpol.2007.04.004

PPC, 2002, ANN REV PROGR ISL AU

NR 8

TC 0



Z9 0  
 U1 0  
 U2 1  
 PU ELSEVIER SCIENCE BV  
 PI AMSTERDAM  
 PA SARA BURGERHARTSTRAAT 25, PO BOX 211, 1000 AE AMSTERDAM, NETHERLANDS  
 SN 1876-6102  
 J9 ENRGY PROCED  
 PY 2012  
 VL 18  
 BP 131  
 EP 146  
 DI 10.1016/j.egypro.2012.05.025  
 PG 16  
 WC Energy & Fuels; Environmental Sciences  
 SC Energy & Fuels; Environmental Sciences & Ecology  
 GA BAR42  
 UT WOS:000305286700014  
 OA gold  
 DA 2018-05-03  
 ER

PT B  
 AU Junghans, A  
 AF Junghans, A.  
 BE Gudnason, G  
 Scherer, R  
 TI Building use as source of innovation for energy efficiency improvement  
 of non-residential buildings  
 SO EWORK AND EBUSINESS IN ARCHITECTURE, ENGINEERING AND CONSTRUCTION  
 LA English  
 DT Proceedings Paper  
 CT 9th European Conference on Product and Process Modelling  
 CY JUL 25-27, 2012  
 CL Reykjavik, ICELAND

AB The paper examines the extent to which facility managers are lead users and innovation drivers for improvements to buildings' energy efficiency. Eric von Hippel's lead user theory is used to apply established criteria, as there is a general need to study how buildings are used and operated in order to maximize their full potential for energy saving. The study indicates that facility managers can be considered as the link between energy-efficient buildings and their energy-efficient management and use, and can contribute to improvements in energy efficiency. However, lead user theory does not yet meet all the requirements of service innovation. The paper shows how the three main lead user roles can be applied to the different facilities management (FM) roles of in-house and external FM service providers. Non-residential buildings such as public and private office buildings and hospitals are discussed as having the highest potential for energy saving.

C1 Norwegian Univ Sci & Technol, N-7034 Trondheim, Norway.

RP Junghans, A (reprint author), Norwegian Univ Sci & Technol, N-7034 Trondheim, Norway.

OI Junghans, Antje/0000-0001-7063-9457

CR Aune M., 2005, BUILDINGS LEARN ROLE

Aune M, 2009, FACILITIES, V27, P44, DOI 10.1108/02632770910923081

Churchill J., 2009, LEAD USER PROJECT HD

[Anonymous], 1522112007 EN

enova, 2012, POT BARR EN TIV NORS

Eurostat, 2009, EUR FIG EUR YB 2009, V2009

Jensen P., 2011, AGENDA ORIENTED RES

Junghans A., 2009, BEWERTUNG STEIGERUNG

Kyro R., 2010, CIB W070 P INT C FAC

NVE, 2011, 92011 NVE

Olsson N.E., 2010, WHO IS US CIB W070 P  
 Pistohl W., 2005, HDB GEBAUDETTECHNIK P, V2  
 Thomzik M., 2010, FM BRANCH 2010  
 USGBC [United States Green Building Council], 2011, WHAT LEED MEAS  
 Von Hippel E., 1988, SOURCES INNOVATION  
 von Hippel Eric, 2005, DEMOCRATIZING INNOVA

NR 16

TC 0

Z9 0

U1 0

U2 1

PU CRC PRESS-TAYLOR & FRANCIS GROUP

PI BOCA RATON

PA 6000 BROKEN SOUND PARKWAY NW, STE 300, BOCA RATON, FL 33487-2742 USA

BN 978-0-415-62128-1

PY 2012

BP 89

EP 95

PG 7

WC Computer Science, Hardware & Architecture; Computer Science, Information  
 Systems; Construction & Building Technology

SC Computer Science; Construction & Building Technology

GA BA6JU

UT WOS:000337164500013

DA 2018-05-03

ER

PT S

AU Kerzmann, TL

Werner, EJ

AF Kerzmann, Tony Lee

Werner, Eugene Joseph, Jr.

GP ASEE

TI TURBOFLOW: INTEGRATED ENGINEERING DESIGN THROUGH AN ENERGY EFFICIENT  
 BUILDING COMPETITION

SO 2012 ASEE ANNUAL CONFERENCE

SE ASEE Annual Conference & Exposition

LA English

DT Proceedings Paper

CT ASEE Annual Conference

CY JUN 10-13, 2012

CL San Antonio, TX

SP ASEE

AB Students learn best when there is interest in the topic and what better way to induce interest than to couple classroom theory with real-world application in the form of a competition. Senior engineering students at Robert Morris University established a design team to compete in the 2011 Energy Efficient Building Technologies Challenge which is sponsored by the Mascaro Center for Sustainable Innovation. The students were not only excited to be a part of a design competition that rewarded a cash prize, but there was a remarkable level of enthusiasm associated with the sustainability aspect of the design project. The Energy Efficient Building Technologies Challenge was held over the fall and spring semesters of the 2010-2011 school year. During the fall semester the design team developed an idea for the competition and submitted a proposal. After being accepted into Stage 2 of the competition, the students designed, analyzed and fabricated the "TurboFlow" generation device for their Integrated Engineering and Design course. This prototype was demonstrated for the competition and the design team won first place, with a \$5000 cash prize. Because of the competition, the design team went above and beyond the classroom expectations to design, analyze, fabricate and demonstrate a device with considerable market potential. The students not only analyzed the TurboFlow from an engineering standpoint, but from economic and

sustainability standpoints as well. The famous saying, "Competition Breeds Excellence," could not be more true for this group of students.

C1 [Kerzmann, Tony Lee] Robert Morris Univ, Moon, PA 15108 USA.  
 [Werner, Eugene Joseph, Jr.] GAI Consultants Inc, Homestead, PA 15120 USA.  
 RP Kerzmann, TL (reprint author), Robert Morris Univ, Moon, PA 15108 USA.  
 CR Bloom B. S., 1956, TAXONOMY ED OBJECTIV  
 Calvert J. B., 2003, TURBINES  
 DUNN R, 1981, EDUC LEADERSHIP, V38, P381  
 Dziegielewski B., 2000, COMMERCIAL IND END U  
 Kolb D. A., 1984, EXPERIENTIAL LEARNIN  
 Oertel H, 2004, PRANDTLS ESSENTIALS  
 NR 6  
 TC 0  
 Z9 0  
 U1 0  
 U2 0  
 PU AMER SOC ENGINEERING EDUCATION  
 PI WASHINGTON  
 PA 1818 N STREET, NW SUITE 600, WASHINGTON, DC 20036 USA  
 SN 2153-5965  
 J9 ASEE ANNU CONF EXPO  
 PY 2012  
 PG 10  
 WC Education & Educational Research; Education, Scientific Disciplines;  
 Engineering, Multidisciplinary  
 SC Education & Educational Research; Engineering  
 GA BF1AU  
 UT WOS:000380253704036  
 DA 2018-05-03  
 ER

PT S  
 AU Kumar, B  
 Katsinis, C  
 AF Kumar, Brijesh  
 Katsinis, Constantine  
 GP IEEE  
 TI An Architectural Framework for Mobile Device Interaction with Consumer  
 Home Network Appliances  
 SO 2012 IEEE CONSUMER COMMUNICATIONS AND NETWORKING CONFERENCE (CCNC)  
 SE IEEE Consumer Communications and Networking Conference  
 LA English  
 DT Proceedings Paper  
 CT IEEE Consumer Communications and Networking Conference (CCNC)  
 CY JAN 14-17, 2012  
 CL Las Vegas, NV  
 SP IEEE  
 DE Consumer Networking; Session Initiation Protocol (SIP); Universal Plug  
 and Play (UPnP); Service Discovery; Mobile Applications; Home Networks  
 AB With the proliferation of digital contents and the expanding variety of connected and IP-enabled  
 consumer electronics (CE) devices, consumers are increasingly seeking ways to efficiently integrate their  
 mobile devices with home networked devices. Expanding wireless coverage is enabling exciting new set of  
 consumer-focused applications between CE devices, mobile handsets, home appliances and personal  
 computers. In this paper, we discuss an architectural framework for mobile device interaction with  
 consumer home network appliances and devices. A number of technological elements such as service  
 discovery, addressing and numbering, control and data transport protocols and security requirements are  
 presented and discussed. A realization of this framework will allow mobile devices to interact with home  
 appliances and other consumer electronic devices in a heterogeneous network from remote locations.

C1 [Kumar, Brijesh] Rapidsoft Syst Inc, Ctr Res & Dev, Princeton, NJ 08540 USA.  
 [Katsinis, Constantine] Drexel Univ, Goodwin Coll Profess Studies, Philadelphia, PA 19104 USA.  
 RP Kumar, B (reprint author), Rapidsoft Syst Inc, Ctr Res & Dev, Princeton, NJ 08540 USA.  
 EM bkumar@rapidsoftsystems.com; katsinis@drexel.edu  
 CR DiCioccio L., 2011, CRPRL2011090001 TECH  
 Feamster Nick, 2010, ACM HOMENETS 2010 SE  
 Guttman E., 1999, 2608 RFC  
 Kato Takeshi, 2009, IEEE CCNC 2009 10 13  
 Kumar Brijesh, 2006, MOBILE CONSUMER NETW  
 Nichols Jeffrey, 2006, ACM CHI 2006 APR 22  
 Ou Yang-xin, 2010, 2 INT WORKSH ED TECH  
 Rahman M, 2002, 5TH IEEE INTERNATIONAL WORKSHOP ON NETWORKED APPLIANCES,  
 PROCEEDINGS, P24  
 Shahriyar Rifat, 2008, INT J SMART HOME, V2  
 [Anonymous], 2011, UPNP DEV ARCH V1 1 A  
 NR 10  
 TC 0  
 Z9 0  
 U1 0  
 U2 0  
 PU IEEE  
 PI NEW YORK  
 PA 345 E 47TH ST, NEW YORK, NY 10017 USA  
 SN 2331-9852  
 BN 978-1-4577-2071-0  
 J9 CONSUM COMM NETWORK  
 PY 2012  
 BP 661  
 EP 666  
 PG 6  
 WC Engineering, Electrical & Electronic; Telecommunications  
 SC Engineering; Telecommunications  
 GA BDD68  
 UT WOS:000312834500149  
 DA 2018-05-03  
 ER  
  
 PT S  
 AU Luo, J  
 AF Luo, Jian  
 BE Zhong, S  
 Qu, XL  
 TI Study of Building Energy-Saving Based on TRIZ  
 SO SMART MATERIALS AND INTELLIGENT SYSTEMS  
 SE Advanced Materials Research  
 LA English  
 DT Proceedings Paper  
 CT International Conference on Smart Materials and Intelligent Systems  
 (SMIS 2011)  
 CY DEC 23-25, 2011  
 CL Chongqing, PEOPLES R CHINA  
 SP Shanghai Jiao Tong Univ, Nanyang Normal Univ, Henan Inst Sci & Technol, Hunan Inst Engn, Chongqing  
 Normal Univ  
 DE Building Energy Saving; Energy saving reconstruction; TRIZ; innovation  
 AB Energy saving always attracts many countries' attentions. Energy saving reform of the existing buildings  
 was accepted in many countries. There are a lot of innovation in energy saving. In this paper, we believe  
 that TRIZ can solve these problems in energy saving. Then, we constructed a model of energy-saving

based on TRIZ. This model proposed preliminary solutions by using TRIZ in energy saving. TRIZ will be applied more in this field.

C1 Cent S Univ, Sch Ciivil Engr & Architectrue, Changsha 410075, Hunan, Peoples R China.

RP Luo, J (reprint author), Cent S Univ, Sch Ciivil Engr & Architectrue, Changsha 410075, Hunan, Peoples R China.

EM luojianwork@163.com

CR Altshuller G., 1999, INNOVATION ALGORITHM

Horowitz Roni, 2001, TRIZ J, V8

Kowaliek James, 1997, TRIZ J, V8

Liu C. C., 2001, DEV PRODUCT GREEN IN

Royzen Z., 1997, TRIZ J, V2

ZHANG W, 2005, DEV APPL NANOACTIVAT, V12

NR 6

TC 0

Z9 0

U1 1

U2 4

PU TRANS TECH PUBLICATIONS LTD

PI STAFA-ZURICH

PA LAUBLSRUTISTR 24, CH-8717 STAFA-ZURICH, SWITZERLAND

SN 1022-6680

BN 978-3-03785-345-0

J9 ADV MATER RES-SWITZ

PY 2012

VL 442

BP 58

EP 61

DI 10.4028/www.scientific.net/AMR.442.58

PG 4

WC Computer Science, Interdisciplinary Applications; Engineering,  
Multidisciplinary; Materials Science, Multidisciplinary

SC Computer Science; Engineering; Materials Science

GA BBB73

UT WOS:000306347500013

DA 2018-05-03

ER

PT B

AU Shi, Z

Liu, Y

Tong, X

Zeng, P

Yu, HB

AF Shi, Zhao

Liu, Yang

Tong, Xing

Zeng, Peng

Yu, Haibin

BE Mao, HQ

TI A System Architecture for Energy Saving in Buildings

SO PROCEEDINGS OF THE 2ND INTERNATIONAL CONFERENCE ON COMPUTER AND  
INFORMATION APPLICATIONS (ICCIA 2012)

LA English

DT Proceedings Paper

CT 2nd International Conference on Computer and Information Applications  
(ICCIA)

CY DEC 08-09, 2012

CL Taiyuan, PEOPLES R CHINA

SP Comp Sci & Elect Technol Int Soc

DE smart grid; energy consumption statistic; person-device interaction;  
user energy consumption behaviors; cloud computing

ID SERVICES

AB Advances in smart grid technologies have been proven to improve energy efficiency. These technologies will drive significant changes of energy consumption operation, energy management, energy using patterns, and customer services. In order to achieve energy saving efficiently and provide smart services automatically for users, the architecture of a smart energy monitoring and management system is proposed in this paper. By monitoring the power consumption information, environment information and users' situation information, the system based on the architecture can calculate the proportion of wasted energy consumption based on the energy consumption statistic, provide smart services based on the person-device interaction, and forecast the energy consumption based on the user energy consumption behaviors. The system is combined with cloud computing for data storage and processing. This paper describes the design and partial implementation of the system architecture.

C1 [Shi, Zhao; Liu, Yang; Tong, Xing; Zeng, Peng; Yu, Haibin] Chinese Acad Sci, Shenyang Inst Automat, Dept Ind Control Network & Syst, Shenyang 110016, Liaoning, Peoples R China.  
[Shi, Zhao] Univ Chinese Acad Sci, Beijing 100049, Peoples R China.

RP Shi, Z (reprint author), Chinese Acad Sci, Shenyang Inst Automat, Dept Ind Control Network & Syst, Shenyang 110016, Liaoning, Peoples R China.

EM shizhao@sia.cn

FU Strategic Priority Research Program of the Chinese Academy of Sciences  
[XDA06020302]; Important National Science and Technology Specific  
Project [2010ZX03006-005-01]; National High Technology Research and  
Development Program of China under 863 Program [2011AA040103]; Natural  
Science Foundation of China [61100159]

FX The authors acknowledge the financial support of the Strategic Priority  
Research Program of the Chinese Academy of Sciences under Grant No.  
XDA06020302, the Important National Science and Technology Specific  
Project under Contact No. 2010ZX03006-005-01, the National High  
Technology Research and Development Program of China under 863 Program  
No. 2011AA040103, and the Natural Science Foundation of China under  
Contact No. 61100159.

CR Ahsan Q., 2005, INSTR MEAS TECHN C

Byun J, 2011, IEEE T CONSUM ELECTR, V57, P436, DOI 10.1109/TCE.2011.5955177

Byun J, 2011, IEEE T CONSUM ELECTR, V57, P90, DOI 10.1109/TCE.2011.5735486

Elias CN, 2009, IEEE T POWER SYST, V24, P469, DOI 10.1109/TPWRS.2008.2009490

Jiang X.F., 2010, HIGH FIDELITY ENERGY

Krause A, 2006, IEEE T MOBILE COMPUT, V5, P113, DOI 10.1109/TMC.2006.18

Uhm Y, 2010, IEEE T CONSUM ELECTR, V56, P231, DOI 10.1109/TCE.2010.5439150

Yuriyama M., 2010, 13 INT C NETW BAS IN

NR 8

TC 0

Z9 0

U1 0

U2 0

PU ATLANTIS PRESS

PI PARIS

PA 29 AVENUE LAVMIERE, PARIS, 75019, FRANCE

BN 978-94-91216-41-1

PY 2012

BP 1074

EP 1077

PG 4

WC Computer Science, Theory & Methods; Engineering, Electrical & Electronic

SC Computer Science; Engineering

GA BG9AT

UT WOS:000392928800263

DA 2018-05-03

ER

PT 5

AU Song, Q

Zhang, XJ

AF Song, Qi

Zhang, Xiao-jie

BE Yang, Q

Zhu, LH

He, JJ

Yan, ZF

Ren, R

TI Building Energy-efficiency Running Mode of Large-scale Public Building:

Based on Energy Performance Contracting

SO ADVANCES IN CIVIL ENGINEERING AND ARCHITECTURE INNOVATION, PTS 1-6

SE Advanced Materials Research

LA English

DT Proceedings Paper

CT 4th International Conference on Technology of Architecture and Structure

(ICTAS 2011)

CY SEP 22-24, 2011

CL Xian Univ Architecture & Technol, Xian, PEOPLES R CHINA

SP Chinese Acad Engn, Div Civil Hydraulic & Architecture Engn, China Civil Engn Soc

HO Xian Univ Architecture & Technol

DE large-scale public building; energy efficiency running mode; energy

performance contracting; property management company

AB Energy performance contracting plays a key role in improving the building energy-efficiency in China.

This paper introduces the current situation of energy-efficiency of large-scale public building in China and provides an overview of energy performance contracting, and then puts forward an innovative energy-efficiency running mode. This paper tries to offer theoretical references for the development of EMC in energy-saving field of large-scale public buildings.

C1 [Song, Qi; Zhang, Xiao-jie] Xian Univ Architecture & Technol, Sch Management, Xian 710055, Peoples R China.

RP Song, Q (reprint author), Xian Univ Architecture & Technol, Sch Management, Xian 710055, Peoples R China.

EM songshuya369@hotmail.com; simple1986life@163.com

CR Kang Yan-Bin, 2008, BUILDING ENERGY CONS, pP187

Shen Hai-Long Shen, 2007, CONTRACT ENERGY MANA, pP41

Xue Zhi-Fen, 2007, ENERGY EFFICIENCY PU

NR 3

TC 0

Z9 0

U1 0

U2 10

PU TRANS TECH PUBLICATIONS LTD

PI STAFA-ZURICH

PA LAUBLSRUTISTR 24, CH-8717 STAFA-ZURICH, SWITZERLAND

SN 1022-6680

BN 978-3-03785-278-1

J9 ADV MATER RES-SWITZ

PY 2012

VL 368-373

BP 3663

EP 3666

DI 10.4028/www.scientific.net/AMR.368-373.3663

PG 4

WC Construction & Building Technology; Engineering, Civil; Materials  
Science, Multidisciplinary

SC Construction & Building Technology; Engineering; Materials Science  
GA BBY80  
UT WOS:000308895900730  
DA 2018-05-03  
ER

PT 5

AU Sweetser, R  
AF Sweetser, Richard  
GP ASHRAE

TI Retrofit Energy Efficiency Modeling, Assessments, and Integrated  
Technologies: Seeking Solutions for Small and Medium Sized Buildings

SO ASHRAE TRANSACTIONS 2012, VOL 118, PT 1

SE ASHRAE Transactions

LA English

DT Proceedings Paper

CT ASHRAE Winter Conference

CY 2012

CL Chicago, IL

SP ASHRAE

AB Incorporating full spectrum energy efficiency retrofits into average sized commercial buildings requires significant change in assessment and modeling tools. It is necessary to reduce assessment cost and time, and improve ease of use and accuracy of models while reducing economic risk. Existing small and medium sized building energy efficiency retrofits are often problematic because high assessment cost and degree of uncertainty. Market insertion of decision level analytical tools that provide practitioners with user friendly, accurate, verified, and cost effective energy assessments is an essential first step in gaining market acceptance of energy retrofits. Integrated system design for building renovation, similar to the automotive and aerospace system design practice, is conceptually easy for most engineers to understand. In practice, it remains the most challenging effort to achieve improved building energy retrofits. The system performance driven approach to building renovation requires: selecting component technologies, subsystem architectures and dynamically coordinated controls to meet internal and envelope loads while producing a measurably improved indoor environment for a given cost constraint. The systems performance approach requires a change in assessment and modeling tools and equipment selection evaluated with whole building performance metrics rather than component efficiencies. Finally, new integrated hardware and software is not enough to move this complex market. Public policy and even human behavior will need to change, education and workforce transformation must occur and new business models must be developed. This paper focuses on the strategy to deliver these near-term cost effective retrofit solutions to the market.

CR CEC, 2000, CAL EN COMM PUBL, P13

CRGP, 2010, DIFF EN SAV TECHN BU

ENR, 2010, TOP 400 CONTR 2010

GPIC1, 2011, COMMUNICATION

HUB, 2011, DOES BUILD EN EFF HU

IFMA, 2009, 2009 EN EFF IND IFMA

PLMA, 2010, 1 ANN DAT PRIV LAW C

Dana A. Sheffer, 57 COLL RES GLOB PRO

US Department of Energy, 2011, US DEP EN EN EFF REN

NR 9

TC 0

Z9 0

U1 0

U2 3

PU AMER SOC HEATING, REFRIGERATING AND AIR-CONDITIONING ENGS

PI ATLANTA

PA 1791 TULLIE CIRCLE NE, ATLANTA, GA 30329 USA

SN 0001-2505

J9 ASHRAE TRAN

PY 2012



VL 118

BP 341

EP 350

PN 1

PG 10

WC Thermodynamics; Construction & Building Technology

SC Thermodynamics; Construction & Building Technology

GA BDC57

UT WOS:000312640000043

DA 2018-05-03

ER

PT S

AU Tu, JS

Li, RX

Qin, FY

AF Tu, Jinsong

Li, Ruixia

Qin, Fengyan

BE Chu, MJ

Xu, HH

Jia, Z

Fan, Y

Xu, JP

TI Study on Residential Building Energy-saving Comprehensive Evaluation

System in Hot Summer and Cold Winter Zone Based on AHP

SO SUSTAINABLE ENVIRONMENT AND TRANSPORTATION, PTS 1-4

SE Applied Mechanics and Materials

LA English

DT Proceedings Paper

CT 2nd International Conference on Civil Engineering, Architecture and

Building Materials (CEABM 2012)

CY MAY 25-27, 2012

CL Yantai, PEOPLES R CHINA

SP Yantai Univ, Sch Civil Engr, Guizhou Univ, Coll Civil & Architecture Engr, Hainan Soc Theoret & Appl Mech

DE AHP; hot summer and cold winter; residential buildings energy-saving; comprehensive evaluation

AB A new evaluation method was proposed for hot -summer and cold -winter zone, which based on domestic and foreign energy-saving standard and evaluation technology as well as the current situation. The residential building energy-saving system evaluation model was established by referencing the AHP method model, its weight of each evaluation index came from the experts' investigation method, and was modified by entropy technology to index. The results show that, this method can not only simplified the qualitative and quantitative evaluation index quantification process but also improve the whole evaluation system operability. At last, we made a empirical analysis and evaluation of comprehensive of a small unit residential in Lu'an, the result shows that although the residential building energy conservation in the basically meet the national building energy efficiency requirements, it still needs to be improved in some other aspects.

C1 [Tu, Jinsong; Qin, Fengyan] W Anhui Univ, Inst Architecture & Civil Engr, Luan 237012, Peoples R China.

[Li, Ruixia] W Anhui Univ, Inst Informat Engr, Luan 237012, Peoples R China.

RP Tu, JS (reprint author), W Anhui Univ, Inst Architecture & Civil Engr, Luan 237012, Peoples R China.

EM tjs0622@163.com; lrx0219@wxc.edu.cn; qinfengy\_6370@qq.com

FU education department of Anhui province provincial scientific research projects in universities [KJ2011B214]

FX The author would like to thank fund project support of the education department of Anhui province provincial scientific research projects in universities (KJ2011B214).

CR Law of the Ministry of construction of People's Republic of China, GBT503782006 LAW MIN

Law of the Ministry of construction of People's Republic of China, GBT503622005 LAW MIN

Saaty T. L., 1990, ANAL HIERARCHY PROCE

Si Xiaolei, 2008, ENERGY EFFICIENCY BU, P71

Tu Jinsong, 2010, J W ANHUI U, P25

Yang Yulan, 2009, EVALUATION ENERGY EF

[Anonymous], 2003, 7520032003 JGJ

NR 7

TC 0

Z9 0

U1 0

U2 2

PU TRANS TECH PUBLICATIONS LTD

PI DURNTEN-ZURICH

PA KREUZSTRASSE 10, 8635 DURNTEN-ZURICH, SWITZERLAND

SN 1660-9336

BN 978-3-03785-424-2

J9 APPL MECH MATER

PY 2012

VL 178-181

BP 102

EP +

DI 10.4028/www.scientific.net/AMM.178-181.102

PG 3

WC Construction & Building Technology; Engineering, Environmental;

Engineering, Civil; Transportation Science & Technology

SC Construction & Building Technology; Engineering; Transportation

GA BCY56

UT WOS:000312044400021

DA 2018-05-03

ER

PT B

AU Twomey, KM

Conover, S

Webber, ME

AF Twomey, Kelly M.

Conover, Susan

Webber, Michael E.

GP ASME

TI REDUCING RESIDENTIAL AND COMMERCIAL ENERGY CONSUMPTION IN THE US: THE

ROLE OF WATER HEATERS

SO PROCEEDINGS OF THE ASME 6TH INTERNATIONAL CONFERENCE ON ENERGY

SUSTAINABILITY - 2012, PTS A AND B

LA English

DT Proceedings Paper

CT 6th ASME International Conference on Energy Sustainability

CY JUL 23-26, 2012

CL San Diego, CA

SP ASME, Adv Energy Syst Div, ASME, Solar Energy Div

DE Energy Water Nexus; Water Heating; Residential; Commercial

AB Residential and commercial water heating in the United States consumed nearly 3,700 trillion British Thermal Units (BTUs) of primary energy in 2010. Nearly half of this primary energy was lost as waste heat at the point of power generation to provide electricity for electric water heaters. In the residential sector alone, water heating accounted for 17% of total 2010 onsite energy, use or about 1,960 trillion BTUs. Of this amount, about 22%, or 440 trillion BTUs, was consumed by residential electric water heaters. However, 1,380 trillion BTUs of primary energy was required to produce this retail electric power at the power station, indicating that electricity generation is much less efficient than directly burning fuels for water heating.

This study analyzes 2010 baseline primary energy consumption for water heating in the US by considering energy conversions and end-use efficiencies in the residential and commercial sectors. In order to assess more energy and carbon-efficient means of heating water, we defined four additional scenarios in order to quantify potential energy savings by replacing electric water heaters with more efficient, commercially available technologies. The scenarios ranged in scope and technology deployment, and resulted in energy savings of 10-25% and carbon dioxide emission reductions of 10-20%. Although future deployment of water heating technologies is not likely to replicate any specific scenario, the conclusions drawn from this study are useful in guiding policy incentives and consumer behavior in regards to choosing between water heating technologies.

C1 [Twomey, Kelly M.; Conover, Susan; Webber, Michael E.] Univ Texas Austin, Dept Mech Engr, Austin, TX 78712 USA.

RP Twomey, KM (reprint author), Univ Texas Austin, Dept Mech Engr, Austin, TX 78712 USA.

EM kmt@mail.utexas.edu

CR ACEEE, 2011, WAT HEAT, V2011

Biaou AL, 2005, ENVIRONMENT, V43, P651

Dharuman C, 2004, ENERGBUILDINGS, V38, P214

Dieckmann J, 2009, ASHRAE J, V51, P117

Diem A, 2011, EGRID FAQ

DOE, 2011, 2010 COMM EN END US

DOE (Dept. of Envt), 2011, 2010 RES EN END US S

EIA, 2011, VOL REP GREENH GAS P, V2011

EIA, 2010, ANN EN REV

Energy Information Administration (EIA), 2009, ANN EN REV

Hepbasli A, 2009, RENEW SUST ENERGBUILDINGS, V13, P1211, DOI 10.1016/j.rser.2008.08.002

Hiller CC, 2011, ASHRAE TRAN, V117, P727

Klein G, 2010, SOLAR 2010 C P, P1

Lekov A, 2009, ENERGY EFFICIENCY, V3, P203

Schoenbauer B, 2010, ASHRAE T, V117, P657

US Census Bureau, 2011, 2010 CENS BUR STAT

NR 16

TC 0

Z9 0

U1 0

U2 2

PU AMER SOC MECHANICAL ENGINEERS

PI NEW YORK

PA THREE PARK AVENUE, NEW YORK, NY 10016-5990 USA

BN 978-0-7918-4481-6

PY 2012

BP 1155

EP 1162

PG 8

WC Energy & Fuels; Engineering, Mechanical

SC Energy & Fuels; Engineering

GA BA4HE

UT WOS:000335710300133

DA 2018-05-03

ER

PT S

AU Wang, L

AF Wang Li

BE Ren, N

Che, LK

Jin, B

Dong, R

Su, H

TI A Study on Building Energy Efficiency and Low-Carbon Building

SO RENEWABLE AND SUSTAINABLE ENERGY II, PTS 1-4  
SE Advanced Materials Research  
LA English  
DT Proceedings Paper  
CT 1st International Conference on Energy and Environmental Protection  
(ICEEP 2012)  
CY JUN 23-24, 2012  
CL Hohhot, PEOPLES R CHINA  
SP Inner Mongolia Univ  
DE building energy efficiency; low-carbon buildings; CO2 emission reduction  
AB Resource shortage and people's concern about carbon emissions will greatly influence building energy efficiency. Building energy efficiency is the basis for achieving carbon reduction and it should develop into low-carbon building. After introducing the concept of low-carbon buildings, this paper analyzes the important role technology plays in low-carbon building development and proposes several energy-efficiency measures concerning new building construction, old building transformation and low carbon lifestyle. The paper aims to be of help in promoting the development of low-carbon buildings.  
C1 Univ Sci & Technol Liaoning, Dept Architecture & Arts Design, Anshan 114051, Liaoning, South Korea.  
RP Wang, L (reprint author), Univ Sci & Technol Liaoning, Dept Architecture & Arts Design, Anshan 114051, Liaoning, South Korea.  
CR Wu Liangyong, 1989, GENERALIZED ARCHITEC, P77  
Yang Changming, 2010, RESOURCES RECYCLING, P5  
Yang Changming, 2010, RESOURCES RECYCLING, P15  
Yang Changming, 2010, RESOURCES RECYCLING, P22  
NR 4  
TC 0  
Z9 0  
U1 0  
U2 5  
PU TRANS TECH PUBLICATIONS LTD  
PI STAFA-ZURICH  
PA LAUBLSRUTISTR 24, CH-8717 STAFA-ZURICH, SWITZERLAND  
SN 1022-6680  
BN 978-3-03785-414-3  
J9 ADV MATER RES-SWITZ  
PY 2012  
VL 512-515  
BP 2848  
EP 2853  
DI 10.4028/www.scientific.net/AMR.512-515.2848  
PG 6  
WC Energy & Fuels; Materials Science, Multidisciplinary  
SC Energy & Fuels; Materials Science  
GA BCZ11  
UT WOS:000312119901256  
DA 2018-05-03  
ER  
  
PT B  
AU Xu, G  
Ding, GF  
AF Xu, Gang  
Ding, Gefei  
BE Wang, Y  
Bai, Y  
Shen, GQP  
TI Research on the Expression of Energy Consumption Information of Public Buildings in BIM  
SO PROCEEDINGS OF 2012 INTERNATIONAL CONFERENCE ON CONSTRUCTION & REAL

ESTATE MANAGEMENT, VOLS 1 AND 2

LA English

DT Proceedings Paper

CT International Conference on Construction and Real Estate Management

CY OCT 01-02, 2012

CL Kansas City, KS

SP Harbin Inst Technol, N Dakota State Univ, Univ Kansas, Hong Kong Polytechn Univ, Queensland Univ Technol, Univ Florida, Purdue Univ, Univ Salford, Univ W England, Florida Int Univ, Natl Univ Singapore, Amer Soc Civil Engr, Construct Inst, China Construct Ind Assoc, Modernizat Management Comm

DE BIM; public buildings; energy consumption calculation

ID DESIGN

AB BIM (Building Information Model) technology is the foundation to realize the computer simulation of design and construction of buildings. It is great important to improve the development of construction industry informatization. At present, its application in collaborative design, green buildings, building components prefabrication and so on is successful in developed countries. In order to simplify the currently complicated situation of the energy consumption calculation of public buildings, this paper discusses how to make use of the information in BIM of the given public building to calculate its total energy consumption in its lifecycle to simplify its energy consumption simulation in the design phase and to improve the collaboration of architectural design and energy consumption control.

C1 [Xu, Gang; Ding, Gefei] Soochow Univ, Gold Mantis Sch Architecture & Urban Environm, Suzhou 215123, Peoples R China.

EM bufengman@yahoo.com.cn; dgf1977@126.com

CR International Alliance for Interoperability (IAI), 2000, IFC TECHN GUID

Khanzode A., 2008, ELECT J INFORM TECHN, V13, P205

National BIM Standards Committee (NBSC), 2012, NAT BIM STAND

Sanguinetti P, 2012, ADV ENG INFORM, V26, P317, DOI 10.1016/j.aei.2011.12.001

Suermann Patrick C., 2009, J ITCON, V14, P574

Yuan Y, 2011, PROCEDIA ENGINEER, V15, DOI 10.1016/j.proeng.2011.08.987

NR 6

TC 0

Z9 0

U1 1

U2 7

PU CHINA ARCHITECTURE & BUILDING PRESS

PI BEIJING

PA BAIWANZHUANG XICHENGGU, BEIJING, 10037, PEOPLES R CHINA

BN 978-7-112-14631-4

PY 2012

BP 424

EP 427

PG 4

WC Business, Finance; Construction & Building Technology; Engineering, Industrial; Management

SC Business & Economics; Construction & Building Technology; Engineering

GA BGY26

UT WOS:000324566700089

DA 2018-05-03

ER

PT S

AU Xue, JH

Li, HM

AF Xue Jianhua

Li Huimin

BE Li, H

Liu, YF

Guo, M

Zhang, R

Du, J

TI Firms and government behaviors for sustainable buildings energy-saving  
SO SUSTAINABLE DEVELOPMENT OF URBAN ENVIRONMENT AND BUILDING MATERIAL, PTS

1-4

SE Advanced Materials Research

LA English

DT Proceedings Paper

CT 4th International Conference on Technology of Architecture and Structure  
(ICTAS 2011)

CY SEP 22-24, 2011

CL Xian Univ Architecture & Technol, Xian, PEOPLES R CHINA

SP Chinese Acad Engn, Div Civil Hydraulic & Architecture Engn, China Civil Engn Soc

HO Xian Univ Architecture & Technol

DE Buildings energy-saving; Sustainable development; Government behaviors;  
Transparadox

AB Both firms and government characterized dual and simultaneous behaviors about sustainable buildings energy-saving. This study will formulate 2\*2 matrixes to construct four different interactive types about firms and government behaviors such as reaction, leadership, acceptance, and transparadox. In addition, we also analyze that how different types impact sustainable buildings energy-saving. This study not only makes important theoretical contributions on analyzing and exploring firms' and governmental behavior portfolios for sustainable buildings energy-saving, but also makes significant managerial implication on transferring other three portfolios into transparadox type in order to growing sustainable buildings energy-saving.

C1 [Xue Jianhua; Li Huimin] Xian Univ Architecture & Technol, Sch Civil Engn, Xian, Shaanxi, Peoples R China.

RP Xue, JH (reprint author), Xian Univ Architecture & Technol, Sch Civil Engn, 13 YanTa S Rd, Xian, Shaanxi, Peoples R China.

EM xuejianhua6810@sohu.com; liudan7622@163.com

CR DeCanio SJ, 1998, ENER POLICY, V26, P441, DOI 10.1016/S0301-4215(97)00152-3

Oliver C, 2008, ACAD MANAGE REV, V33, P496

Peng MW, 2003, ACAD MANAGE REV, V28, P275, DOI 10.5465/AMR.2003.9416341

Shen L Y, 2002, INT J PROJ MANAG, V20, P535, DOI DOI 10.1016/S0263-7863(01)00054-0

Xie Y, 2011, ADV MATER RES-SWITZ, V201-203, P2466, DOI 10.4028/www.scientific.net/AMR.201-203.2466

Yik FWH, 2004, BUILD RES INF, V32, P235, DOI 10.1080/0961321042000189653

NR 6

TC 0

Z9 0

U1 2

U2 5

PU TRANS TECH PUBLICATIONS LTD

PI STAFA-ZURICH

PA LAUBLSRUTISTR 24, CH-8717 STAFA-ZURICH, SWITZERLAND

SN 1022-6680

BN 978-3-03785-279-8

J9 ADV MATER RES-SWITZ

PY 2012

VL 374-377

BP 14

EP 17

DI 10.4028/www.scientific.net/AMR.374-377.14

PN 1-4

PG 4

WC Engineering, Civil; Materials Science, Multidisciplinary

SC Engineering; Materials Science

GA BBZ57

UT WOS:000309192500003

DA 2018-05-03  
ER

PT S

AU Zhang, GQ

Zhang, L

Wang, M

Shen, B

Li, CD

Yan, Q

AF Zhang Guiqing

Zhang Lin

Wang Ming

Shen Bin

Li Chengdong

Yan Qiao

BE Fan, W

TI Design of Building Heating Supply Energy-Saving Control System Based on Information Fusion

SO MANUFACTURING SCIENCE AND TECHNOLOGY, PTS 1-8

SE Advanced Materials Research

LA English

DT Proceedings Paper

CT International Conference on Manufacturing Science and Technology (ICMST 2011)

CY SEP 16-18, 2011

CL Singapore, SINGAPORE

SP Singapore Inst Elect

DE Information Fusion; Building Heating Supply System; Energy Saving Control

AB An energy-saving control system for building heating supply system is presented in this paper. Its design and implementation are on the basis of occupancy detection in buildings. By taking advantage of the information fusion technology, the control system will determine human's location and control the heating equipments automatically according to non-human zone and human zone to realize the energy saving. The information fusion technology fuses three categories of information, which are the people counting information, the infrared sensors information and the RFID information. How to design and implement the heating energy-saving control system is described explicitly in this paper. Since the system has developed with platform concept based on the wireless network and the Internet, it can be used to other building electrical equipment systems with less modification.

C1 [Zhang Guiqing; Zhang Lin; Wang Ming; Li Chengdong; Yan Qiao] Shandong Jianzhu Univ, Sch Informat & Elect Engn, Jinan, Peoples R China.

[Zhang Guiqing; Zhang Lin; Wang Ming; Shen Bin; Li Chengdong; Yan Qiao] Shandong Key Lab Intelligent Bldg Technol, Jinan, Peoples R China.

[Shen Bin] Shandong Jianzhu Univ, Sch Comp Sci & Technol, Jinan, Peoples R China.

RP Zhang, GQ (reprint author), Shandong Jianzhu Univ, Sch Informat & Elect Engn, Jinan, Peoples R China.

EM qqzhang@sdjzu.edu.cn

FU Natural Science Foundation of China [61074149]

FX This work is supported by Natural Science Foundation of China(61074149).

CR BOYLE DANIEL K., 1998, PASSENGER COUNTING T, P1

Feldmann S., 2003, INT C WIR NETW

Hashiiinoto Kazuhiko, 1997, INT C SOL STAT SENS, P1291

Lin Yan, 2003, Control Engineering China, V10, P539

LIU Wenqi, 2004, J DALIAN U TECHNOLOG, V44, P563

Reuter Lawrence G., 2003, PASSENGER COUNTING S, P1

Fan Qifu, 2008, J COMPUTER APPL, V24, P16

XUE Aijun, 2004, DYNAMICS RES NETWORK

[??? ZHOU Shoujun], 2008, [???????. ???, Journal of Shandong University. Engineering Science], V38, P93

NR 9

TC 0

Z9 0

U1 0

U2 3

PU TRANS TECH PUBLICATIONS LTD

PI DURNTEN-ZURICH

PA KREUZSTRASSE 10, 8635 DURNTEN-ZURICH, SWITZERLAND

SN 1022-6680

BN 978-3-03785-295-8

J9 ADV MATER RES-SWITZ

PY 2012

VL 383-390

BP 5484

EP +

DI 10.4028/www.scientific.net/AMR.383-390.5484

PG 2

WC Computer Science, Interdisciplinary Applications; Engineering,  
 Manufacturing; Engineering, Mechanical; Materials Science,  
 Multidisciplinary

SC Computer Science; Engineering; Materials Science

GA BBY99

UT WOS:000309016402272

DA 2018-05-03

ER

PT B

AU Zhao, GM

AF Zhao Guomin

GP IEEE

TI The Research of the Application of Energy Saving Technology in Rural  
 House in Cold Region

SO 2012 WORLD AUTOMATION CONGRESS (WAC)

LA English

DT Proceedings Paper

CT World Automation Congress (WAC)

CY JUN 24-28, 2012

CL Puerto Vallarta, MEXICO

SP TSI Enterprises Inc

DE cold regions; rural house; new energy; energy-saving technologies

AB Energy-efficient housing construction village is a complex systematic project, involving political, economic, social, cultural, environmental, technological and other aspects of the content. By stage of development and economic conditions, towns and villages residential building energy efficiency-related technology development is very slow. Although China has carried out some basic research, but the village due to lack of systematic energy-saving technology and with the support of key technologies, towns and villages to promote energy-saving technologies falter. In this paper, according to China's towns and villages in the northern cold regions technology development status and energy saving technology to carry out the actual needs of towns and villages, Taking Tianjin, Maojiayu village construction project as a example, the paper research the energy-saving technologies and new energy in our villages in northern cold regions construction applications.

C1 [Zhao Guomin] Tianjin Univ, Tianjin Inst Urban Construct, Energy Technol & Mech Engr Dept, Tianjin 300384, Peoples R China.

RP Zhao, GM (reprint author), Tianjin Univ, Tianjin Inst Urban Construct, Energy Technol & Mech Engr Dept, Tianjin 300384, Peoples R China.

EM guominzhao@163.com

CR Dong hairong, 2005, ENERGY SAVING LAND I, P12

Ge cuiyu, 2004, EXPLORE RURAL RESIDE, P8

Liu yuan, 2007, THESIS XIAN U ARCHIT

Wang bing, 2005, THESIS TIANJIN U



Wu yanlin, THESIS BEIJING FORES  
 Xiao zhongyu, 2008, THESIS TIANJIN I URB  
 Zhang zhigang, 2010, SOLAR AIR COMBINED H, P1

NR 7

TC 0

Z9 0

U1 0

U2 0

PU IEEE

PI NEW YORK

PA 345 E 47TH ST, NEW YORK, NY 10017 USA

BN 978-1-4673-4497-5

PY 2012

PG 4

WC Automation & Control Systems; Engineering, Electrical & Electronic

SC Automation & Control Systems; Engineering

GA BCJ87

UT WOS:000310335801099

DA 2018-05-03

ER

PT S

AU Addy, P

Webb, D

AF Addy, Pat

Webb, Dave

BE Howlett, RJ

Jain, LC

Lee, SH

TI Energy Saving Technologies for Conventional Dwellings - A 'Whole House'  
 Concept

SO SUSTAINABILITY IN ENERGY AND BUILDINGS

SE Smart Innovation Systems and Technologies

LA English

DT Proceedings Paper

CT 2nd International Conference on Sustainability in Energy and Buildings  
 (SEB 2010)

CY MAY 06-07, 2010

CL Brighton, ENGLAND

AB The concept of a 'whole house' is rarely applied to individual dwellings because each is generally regarded as a loosely connected collection of stand-alone systems that are provided by different manufacturers with hardly any account being given to interconnectability within the overall concept of a house as a single entity. Most houses have very basic systems for the control of major energy sources including heating and lighting. Electronic control systems requiring only basic skills to install and service can give occupants an ongoing overview of their energy use and facilitate minor changes in habit! lifestyle to allow further savings. The effects and lifetime of these control systems will be improved if they include the ability to be reprogrammed by the user to take into account future improvement projects such as upgrades in insulation or the fitting of double glazing or a change in energy supply. Lifestyle and occupation patterns will have a major effect on energy saving within domestic premises. Any proposed system must be adaptable to suit different living patterns. Interfaces between various components therefore need to be as simple as possible to allow 'mixing' of different technologies and possible future developments. It is concluded that a whole house control system that is practical, cost effective, future proof and easy to use is viable but that it could not utilise a single processor design. Instead, a hierarchical system is proposed that presents the possibility of a simple, future proof whole house control system that will accept inputs that are not specified at the time of installation.

C1 [Addy, Pat; Webb, Dave] Leeds Metropolitan Univ, Leeds LS1 3HE, W Yorkshire, England.

RP Addy, P (reprint author), Leeds Metropolitan Univ, Leeds LS1 3HE, W Yorkshire, England.

CR Addy P., 2006, ELECTROMECHANICAL BUI

Anderson W., 2006, DIARY ECOBUILDER  
 Broome J., 2007, GREEN SELF BUILD BOO  
 Department of Communities and Local Government, 2008, COD SUST HOM  
 Department for Communities and Local Government, 2008, GREEN HOM FUT  
 Gadre D.V., 1998, PROGRAMMING PARALLEL  
 Hymers P., 2006, CONVERTING ECOFRIEND  
 Martin C., 2001, DTI PUBLICATION, V01/1292  
 National Statistics Online, 1999, SOCIAL TRENDS, V31  
 SENFT J. R., 1996, INTRO LOW TEMPERATUR  
 Smith D. W., 2006, PIC PRACTICE  
 Turner R., 2003, WHICH GUIDE ENERGY S  
 Wilson A., 2007, CONSUMER GUIDE HOME

NR 13

TC 0

Z9 0

U1 0

U2 2

PU SPRINGER-VERLAG BERLIN

PI BERLIN

PA HEIDELBERGER PLATZ 3, D-14197 BERLIN, GERMANY

SN 2190-3018

BN 978-3-642-17386-8

J9 SMART INNOV SYST TEC

PY 2011

VL 7

BP 45

EP 55

PG 11

WC Construction & Building Technology; Energy & Fuels; Engineering, Civil

SC Construction & Building Technology; Energy & Fuels; Engineering

GA BBM02

UT WOS:000307329200005

DA 2018-05-03

ER

PT B

AU Cowan, KR

Daim, TU

AF Cowan, Kelly R.

Daim, Tugrul U.

BE Kocaoglu, DF

Anderson, TR

Daim, TU

TI Understanding Adoption of Energy Efficiency Technologies: Applying  
 Behavioral Theories of Technology Acceptance & Use to Understand the  
 Case of LED Lighting for Commercial, Residential, and Industrial  
 End-Users

SO 2011 PROCEEDINGS OF PICMET 11: TECHNOLOGY MANAGEMENT IN THE ENERGY-SMART  
 WORLD (PICMET)

LA English

DT Proceedings Paper

CT Portland International Center for Management of Engineering and  
 Technology (PICMET) Conference on Technology Management in the  
 Energy-Smart World

CY JUL 31-AUG 04, 2011

CL Portland, OR

SP Portland State Univ, Maseeh Coll Engn & Comp Sci, Dept Engn & Technol Management, Portland State  
 Univ, Off Informat Technol, IKON Off Solut

## ID FLUORESCENT LAMPS; BUILDINGS; PROGRAMS; DESIGN

AB What factors are most significant in understanding adoption behavior for energy efficiency technologies by commercial, residential, and industrial customers? The case of energy efficient lighting technologies is specifically examined. Several types of lighting technologies are compared to indoor LED lighting to determine how the technology meets the needs the various user types. What factors are most significant in motivating technology adoption for such technologies, and preventing subsequent technology disadoption? This is particularly important for energy efficient lighting technologies, as both technology adoption and technology disadoption can be extremely rapid, and ongoing user involvement is often required to recognize full benefits from these technologies. The Unified Theory of Acceptance and Use of Technology (UTAUT) is useful in explaining adoption behavior related to stakeholder expectation and buy-in for the new technologies. UTAUT contains four elements that can be adapted to fit this research: (1) Performance Expectancy; (2) Effort Expectancy; (3) Social Influences; and (4) Facilitating Conditions. In the case of energy efficient lighting adoption, and LED adoption in particular, performance expectancy and effort expectancy can be related to factors such as future energy price expectancies, actual savings results, and ease of energy savings. Factors involving social influences include perceptions of environmental friendliness among different user groups, and facilitating conditions include policies, incentives, and educational programs to encourage adoption. Some conclusions are then drawn regarding adoption factors for emerging energy efficient lighting technologies.

C1 [Cowan, Kelly R.; Daim, Tugrul U.] Portland State Univ, Dept Engr & Technol Management, Portland, OR 97207 USA.

RP Cowan, KR (reprint author), Portland State Univ, Dept Engr & Technol Management, Portland, OR 97207 USA.

CR Ajzen I., 1991, ORG BEHAV HUMAN DECI, V50, P33

Anderson ST, 2004, RESOUR ENERGY ECON, V26, P27, DOI 10.1016/j.reseneeco.2003.07.001

Andrews CJ, 2009, ENERGBUILDINGS, V41, P287, DOI 10.1016/j.enbuild.2008.09.009

Azevedo IL, 2009, P IEEE, V97, P481, DOI 10.1109/JPROC.2009.2013058

Bammidi V. S., 2009, ZERO GEN CAMPUSES DE, P2999

Barr S, 2005, ENERGPOLICY, V33, P1425, DOI 10.1016/j.enpol.2003.12.016

BASS FM, 1969, MANAGE SCI, V15, P215, DOI 10.1287/mnsc.15.5.215

Bohlen J, 1957, RURAL SOCIOL, V22, P3

BUSCH JF, 1993, ENERGY, V18, P197, DOI 10.1016/0360-5442(93)90104-L

Caird S, 2008, ENEREFFIC, V1, P149, DOI 10.1007/s12053-008-9013-y

Chirarattananon S, 2010, ENERGY, V35, P1741, DOI 10.1016/j.energy.2009.12.027

Cowan K., 2010, EXPLORING IMPACT TEC

Daim TU, 2010, INT J ENERGY SECT MA, V4, P146, DOI 10.1108/17506221011058678

Davis F. D., 1985, TECHNOLOGY ACCEPTANC

DiLouie C., 2005, Electrical Construction and Maintenance, V104, P14

DOE, 2009, DOE SOL STAT LIGHT C

EERE, 2009, SOL STAT LIGHT

EIA, 2006, COMM BUILD EN CONS S

EIA, 2008, ANN EN OUTL 2008 PRO

\*EIA, 2009, INT EN OUTL 2009

Fishbein M., 1975, BELIEF ATTITUDE INTE

Forstater M., 2007, ACCOUNTABILITY

Goel M., 2008, RECENT DEV TECHNOLOG, P71

Harmon RR, 2009, TECHNOL FORECAST SOC, V76, P204, DOI 10.1016/j.techfore.2008.03.026

Hinnells M, 2008, ENERGPOLICY, V36, P4427, DOI 10.1016/j.enpol.2008.09.029

Howarth RB, 2000, ENERGPOLICY, V28, P477

IEA, 2005, 30 KEY EN TRENDS IEA

International Energy Agency IRA, 2010, EN TECHN PERSP 2010

Kafle N, 2009, ENERGBUILDINGS, V41, P133, DOI 10.1016/j.enbuild.2008.08.001

Khan N., 2010, RENEW SUST ENER REV, V15, P296

Khan S., 2008, ENERGY SAVING PROGRA, P753

Kumar A, 2003, ENERGPOLICY, V31, P259, DOI 10.1016/S0301-4215(02)00038-1

Kwartin R. M., 1992, ENERGY ENG J, V89, P70

Lee S.-H., 2008, HIGHLY EFFICIENT GRE, P496

LEVINE MD, 1995, ENERGY, V20, P37, DOI 10.1016/0360-5442(94)00055-8

Liu T., 2010, AS PAC POW EN ENG C

Long X, 2009, IET OPTOELECTRON, V3, P40, DOI 10.1049/iet-opt:20070076  
 Mehta R., 2008, LEDS COMPETITIVE SOL  
 Menanteau P, 2000, RES POLICY, V29, P375, DOI 10.1016/S0048-7333(99)00038-4  
 Mills B. F., 2009, RESOUR ENERGY ECON, V32, P363  
 Mills E., 1996, ENERGY, V21, p[d]707  
 Nair G, 2010, ENER POLICY, V38, P2956, DOI 10.1016/j.enpol.2010.01.033  
 Newsham G., 1998, IMPACT ADOPTION EFFI, P286  
 Panasonic, 2010, PAN SPIR FLUOR  
 Plastow JW, 2001, POWER ENG J, V15, P239, DOI 10.1049/pe:20010506  
 Qureshi S. A., 2003, ENERGY CONSERVATION, P369  
 Ray A., 2004, J I ENG INDIA ARCHIT, V85, P21  
 Rogers E. M, 2003, DIFFUSION INNOVATION  
 Rogers EM, 1962, DIFFUSION INNOVATION  
 Scheidt P., 2008, ELECT PRODUCTS GARDE, V50  
 Shively B., 2008, UNDERSTANDING TODAY'S  
 TAYLOR S, 1995, INFORM SYST RES, V6, P144, DOI 10.1287/isre.6.2.144  
 UCSB, 2010, FAST TRACK WID AD LE  
 Van Gorp J.C., 2005, STRATEGIC PLANNING E, V24, P57  
 Veitch JA, 2001, ERGONOMICS, V44, P255, DOI 10.1080/00140130121241  
 Venkatesh V, 2000, ORGAN BEHAV HUM DEC, V83, P33, DOI 10.1006/obhd.2000.2896  
 Venkatesh V, 2003, MIS Q, V27  
 WBCSD, 2008, EN CLIM TRIL FACTS T  
 Weber A., 2007, ASSEMBLY, V50, P46  
 Yang JP, 2007, APPL ENER, V84, P99, DOI 10.1016/j.apenergy.2006.02.007  
 Yang JP, 2006, INT J GREEN ENERGY, V3, P239, DOI 10.1080/01971520500439534  
 ZORPETTE G, 1991, IEEE SPECTRUM, V28, P42, DOI 10.1109/6.83437  
 ZORPETTE G, 1991, IEEE SPECTRUM, V28, P34, DOI 10.1109/6.67282

NR 63

TC 0

Z9 0

U1 4

U2 14

PU IEEE

PI NEW YORK

PA 345 E 47TH ST, NEW YORK, NY 10017 USA

BN 978-1-890843-23-6

PY 2011

PG 9

WC Engineering, Electrical & Electronic; Operations Research & Management  
 Science

SC Engineering; Operations Research & Management Science

GA BYF23

UT WOS:000298384400270

DA 2018-05-03

ER

PT B

AU Huang, ZY

Shen, LY

AF Huang, Zhiyu

Shen, Liyin

GP EBM Org Comm

TI A Study to the Application of Energy Saving Measures in Urban

Residential Buildings: A Chongqing Case Study

SO INTERNATIONAL CONFERENCE ON ENGINEERING AND BUSINESS MANAGEMENT  
 (EBM2011), VOLS 1-6

LA Chinese

DT Proceedings Paper

CT 2nd International Conference on Engineering and Business Management  
CY MAR 22-24, 2011

CL Wuhan, PEOPLES R CHINA

SP Wuhan Univ, Zhejiang Univ, Chung Hua Univ, James Madison Univ, Sci Res Publishing, Engrn Informat  
Inst, Chongqing VIP Informat Co Ltd

DE residential building; energy-saving measures; application level;  
Chongqing

AB Energy saving in urban residential buildings is one of the essential means for implementing and promoting low carbon living environment and sustainable urban development. Therefore, adopting effective energy saving measures is very important. In line with the world-wide promotion and appeal for saving natural resources and protecting the environment, significance progress has been made in saving energy and utilizing the energy effectively by adopting advanced technologies and management methods. Various energy saving technologies have been developed and progressively applied to residential buildings particularly in urban areas. Nevertheless, it appears that little has been investigated on the effectiveness of these technologies in practice. In this paper, taking Chongqing as an example, questionnaire survey was carried out among relevant experts in Energy Conservation Association, Architectural Design Unit as well as Construction Unit considering energy-saving measures of residential building. It was aimed to understand the application level of various energy-saving measures in urban residential building and analyze the difference statistically. Based on the questionnaire survey results, it discussed the deficiencies of energy-saving measures in urban residential building, and the results would provide important reference material for further research to improve the residential building's energy-saving.

C1 [Huang, Zhiyu] Chongqing Univ Sci & Technol, Chongqing, Peoples R China.

[Shen, Liyin] Hong Kong Polytech Univ, Hong Kong, Hong Kong, Peoples R China.

RP Huang, ZY (reprint author), Chongqing Univ Sci & Technol, Chongqing, Peoples R China.

EM cqhzzy2966@163.com

CR Dai Hong, 2007, SCI TECH INFORM DEV, V17, P268

Gong Wei, 2009, JIANGXI BUILDING MAT, P14

Huang Chen, 2003, REFRIGERATION AIR CO, V24, P1

KANO Zelong, 2008, SCI TECHNOLOGY INFOR, P139

Li Yanbo, 2005, WALL MAT INNOVATION, P18

Tan Wenjuan, 2009, RES ENERGY SAVING EF, P4

Wang Jidong, 2007, CHINA HIGH TECHNOLOG, P183

Wu Jianping, 2009, J INNER MONGOLIA FOR, P28

Xiao Yuejun, 2007, ANHUI ARCHITECTURE, p[11, 15]

NR 9

TC 0

Z9 0

U1 0

U2 2

PU SCI RES PUBL, INC-SRP

PI IRVIN

PA 5005 PASEO SEGOVIA, IRVIN, CA 92603-3334 USA

BN 978-1-935068-19-8

PY 2011

BP 3103

EP +

PG 3

WC Business; Computer Science, Information Systems; Engineering,  
Industrial; Management

SC Business & Economics; Computer Science; Engineering

GA BUL45

UT WOS:000289742701064

DA 2018-05-03

ER

PT B

AU Huang, ZY

Huang, Y  
 AF Huang, Zhiyu  
 Huang, Yin  
 BE Xu, M  
 Shen, L  
 Fang, Y

TI A Study to the Application of Energy-saving Measures in Urban Residential Buildings

SO PROCEEDINGS OF THE 16TH INTERNATIONAL SYMPOSIUM ON ADVANCEMENT OF CONSTRUCTION MANAGEMENT AND REAL ESTATE (CRIOCM2011)

LA English

DT Proceedings Paper

CT 16th International Symposium on Advancement of Construction Management and Real Estate (CRIOCM 2011)

CY SEP 23-25, 2011

CL Chongqing, PEOPLES R CHINA

DE Residential building; energy-saving measures; application level

AB Energy saving in urban residential buildings is one of the essential means for implementing and promoting low carbon living environment and sustainable urban development. Therefore, adopting effective energy saving measures is very important. Various energy saving technologies have been developed and progressively applied to residential buildings particularly in urban areas. Nevertheless, it appears that little has been investigated on the effectiveness of these technologies in practice. In this paper, taking Chongqing as an example, questionnaire survey was carried out among relevant experts, considering energy-saving measures of residential building. It was aimed to understand the application level of various energy-saving measures in urban residential building. Based on the questionnaire survey results, it discussed the deficiencies of energy-saving measures in urban residential building, and the results would provide important reference material for further research to improve the residential building's energy-saving.

C1 [Huang, Zhiyu; Huang, Yin] Chongqing Univ, Chongqing 630044, Peoples R China.

EM zhuyahui613@126.com

CR Dai Hong, 2007, SCI TECH INFORM DEV, V17, P268

Gong Wei, 2009, JIANGXI BUILDING MAT, P14

Huang Chen, 2003, REFRIGERATION AIR CO, V24, P1

KANG Zelong, 2008, SCI TECHNOLOGY INFOR, P139

Li Yanbo, 2005, WALL MAT INNOVATION, P18

Tan Wenjuan, 2009, RES ENERGY SAVING EF, P4

Wang Jidong, 2007, CHINA HIGH TECHNOLOG, P183

Wu Jianping, 2009, J INNER MONGOLIA FOR, P28

Xiao Yuejun, 2007, ANHUI ARCHITECTURE, p[11, 15]

Xiao Yuejun, 2007, ANHUI ARCHITECTURE, P15

NR 10

TC 0

Z9 0

U1 0

U2 1

PU HONG KONG POLYTECHNIC UNIV

PI KOWLOON

PA INST TEXTILES & CLOTHING, YUK CHOI RD, HUNG HOM, KOWLOON, 00000, PEOPLES R CHINA

BN 978-962-367-721-9

PY 2011

BP 324

EP 328

PG 5

WC Business; Urban Studies

SC Business & Economics; Urban Studies

GA BAF35

UT WOS:000304017000069

DA 2018-05-03  
ER

PT S

AU Poess, M

Nambiar, R

AF Poess, Meikel

Nambiar, Raghunath

BE Castellanos, M

Dayal, U

Markl, V

TI Building Enterprise Class Real-Time Energy Efficient Decision Support  
Systems

SO ENABLING REAL-TIME BUSINESS INTELLIGENCE

SE Lecture Notes in Business Information Processing

LA English

DT Proceedings Paper

CT 36th International Conference on Very Large Databases

CY SEP 13, 2010

CL Singapore, SINGAPORE

DE Real-Time Decision Support Systems; Lessons learned from large practical  
applications of real-time Business Intelligence; Industrial experience  
and challenges

AB In today's highly competitive marketplace, companies have an insatiable need for up-to-the-second information about their business' operational state, while generating Terabytes of data per day [2]. The ability to convert this data into meaningful business information in a timely, cost effective manner is critical to their competitiveness. For many, it is no longer acceptable to move operational data into specialized analytical tools because of the delay this additional step would take. In certain cases they prefer to directly run queries on their operational data. To keep the response time of these queries low while data volume increases, IT departments are forced to buy faster processors or increase the number of processors per system. At the same time they need to scale the I/O subsystem to keep their systems balanced. While processor performance has been doubling every two years in accordance with Moore's Law, I/O performance is lagging far behind. As a consequence, storage subsystems not only have to cope with the increase in data capacity, but, foremost, with the increase in I/O throughput demand, which is often limited by the disk drive performance and the wire bandwidth between the server and storage.

A solution to this problem is to scale the I/O subsystem for capacity and to cache the database in main memory for performance. This approach not only reduces the I/O requirements, but also significantly reduces power consumption. As the database is physically located on durable media just like traditional databases, all ACID requirements are met.

While such an in-memory solution is feasible today for small data amounts using custom built systems, such a solution seems unfeasible for Multi-Terabyte systems running main-stream relational database management systems (RDBMS) simply because today's systems use CPUs with built-in memory controllers that support only a limited number of memory channels per CPU. In this paper we discuss the viability of building an enterprise class real-time Multi-Terabyte decision support infrastructure by combining the power of Oracle's RDBMS technologies and Cisco's extended memory technology [4]. We believe that Oracle and Cisco combined can deliver effective enterprise class real-time data warehouse infrastructure can deliver value by helping companies to respond to competitive pressures and new opportunities.

C1 [Poess, Meikel] Oracle Corp, 500 Oracle Pkwy, Redwood Shores, CA 94065 USA.

[Nambiar, Raghunath] Cisco Sys Inc, San Jose, CA 95134 USA.

RP Poess, M (reprint author), Oracle Corp, 500 Oracle Pkwy, Redwood Shores, CA 94065 USA.

EM meikel.poess@oracle.com; rnambiar@cisco.com

CR Azvine B., 2006, 29 CECEEE

Poess M, 2000, SIGMOD RECORD, V29, P64

Poess M., 2007, VLDB 2007, P1138

Poess M., 2010, ICDE 2010

Poess M., 2010, WOSP SIPEW 2010 P 1, P147

Poess M., 2005, VLDB, P1055

Poess M., 2010, EE ENERGY, P131

Poess M., 2008, PROC VLDB ENDOW, V1, P1229

NR 8

TC 0

Z9 0

U1 0

U2 2

PU SPRINGER-VERLAG BERLIN

PI BERLIN

PA HEIDELBERGER PLATZ 3, D-14197 BERLIN, GERMANY

SN 1865-1348

BN 978-3-642-22969-5

J9 LECT NOTES BUS INF P

PY 2011

VL 84

BP 36

EP +

PG 3

WC Computer Science, Hardware & Architecture; Computer Science, Information Systems

SC Computer Science

GA BZL82

UT WOS:000301963000004

DA 2018-05-03

ER

PT S

AU Qiu, L

Li, Q

AF Qiu Lin

Li Qiang

GP IEEE

TI Analysis on Video Behavior Analysis in Building Energy Saving Applications

SO 2011 30TH CHINESE CONTROL CONFERENCE (CCC)

SE Chinese Control Conference

LA Chinese

DT Proceedings Paper

CT 30th Chinese Control Conference

CY JUL 22-24, 2011

CL Yantai, PEOPLES R CHINA

DE Video Behavior; Building Energy-Saving; Air-Conditioning; Building Automatic Control

AB By the video behavior analysis technology, it can be access from the video screen according to the study area reached the required target information and changes, which provided a feasible method. for the energy saving to run of building air conditioning systems In this paper proposed the idea that target detection method using air-conditioning system to adjust the run load with actual load time to time and discussed the realized process of video behavior analysis applications in air conditioning systems control. It can obtained the increase or decrease of actual personnel number to monitoring the area to adjust the air conditioning load, and will play a positive role for air-conditioning system make reasonable adjustments to achieve both environment comfort and energy saving effect.

C1 [Qiu Lin; Li Qiang] Beijing Univ Civil Engn & Architecture, Beijing 100044, Peoples R China.

RP Qiu, L (reprint author), Beijing Univ Civil Engn & Architecture, Beijing 100044, Peoples R China.

EM qiulin@bucea.edu.cn

CR DALAL N, 2008, HISTOGRAMS ORIENTED

PARAGIOS N, 2008, MRF BASED APPROACH R

RABAUD V, 2008, COUNTING CROWDED MOV

VAPNIK V, 2000, NATURE STAT LEARNING, P136



NR 4  
 TC 0  
 Z9 0  
 U1 0  
 U2 1  
 PU IEEE  
 PI NEW YORK  
 PA 345 E 47TH ST, NEW YORK, NY 10017 USA  
 SN 2161-2927  
 BN 978-988-17255-9-2  
 J9 CHIN CONTR CONF  
 PY 2011  
 BP 5205  
 EP 5207  
 PG 3  
 WC Automation & Control Systems; Engineering, Electrical & Electronic  
 SC Automation & Control Systems; Engineering  
 GA BDC62  
 UT WOS:000312652105062  
 DA 2018-05-03  
 ER

PT J  
 AU Rubinova, S  
 AF Rubinova, Stela  
 TI REACTION OF HOUSEHOLD ENERGY DEMAND TO IMPROVEMENTS IN ENERGY  
 EFFICIENCY: THEORY AND ITS IMPLICATIONS FOR THE CONSTRUCTION OF  
 EMPIRICALLY TESTED MODELS  
 SO POLITICKA EKONOMIE  
 LA Czech  
 DT Article  
 DE rebound effect; energy efficiency; energy demand; household demand  
 ID CONSUMPTION; FALLACIES

AB Energy efficiency improvements have become a major hope for decoupling the energy demand from economic growth and for achieving environmental goals. Nevertheless, the effectiveness of policies based on promoting energy efficiency may be undermined by behavioral responses. A more efficiently produced energy service becomes cheaper and economic theory then suggests that consumers should demand more of it, which will cause a loss of the potential technological saving. The phenomenon is called the rebound effect and it has become a focus of energy economists since early 80s. However, even today there is no clear consensus on its importance. Quantification of the rebound effect is mainly hampered by poor data availability and the comparison of results is not straightforward due to methodological differences. Our study concentrates right on the economic theory of the demand for energy services, definitions and their applicability to empirical estimation. It summarizes the state of knowledge and elaborates on plausible models for empirical quantification of the rebound effect which should bear consistent results.

C1 [Rubinova, Stela] Charles Univ Prague, Charles Univ Environm Ctr, CH-1211 Geneva 21, Switzerland.

[Rubinova, Stela] Grad Inst Int & Dev Studies, CH-1211 Geneva 21, Switzerland.

RP Rubinova, S (reprint author), Charles Univ Prague, Charles Univ Environm Ctr, Geneva Rue Lausanne 132, POB 136, CH-1211 Geneva 21, Switzerland.

EM stela.rubin@gmail.com

CR BECKER GS, 1965, ECON J, V75, P493, DOI 10.2307/2228949

Berkhout PHG, 2000, ENERG POLICY, V28, P425, DOI 10.1016/S0301-4215(00)00022-7

Binswanger M, 2001, ECOL ECON, V36, P119, DOI 10.1016/S0921-8009(00)00214-7

BROOKES L, 1990, ENERG POLICY, V18, P199, DOI 10.1016/0301-4215(90)90145-T

Brookes L, 2000, ENERG POLICY, V28, P355, DOI 10.1016/S0301-4215(00)00030-6

DUBIN JA, 1984, ECONOMETRICA, V52, P345, DOI 10.2307/1911493

FRONDEL M, 2008, ENERGY J, V4, P154

Frondel M, 2009, ENVIRON RESOUR ECON, V43, P81, DOI 10.1007/s10640-008-9246-4

Koujianou Goldberg P., 1996, 5673 NBER

Greene DL, 1999, ENERGY J, V20, P1  
Greene D.L., 1992, ENERGY J, V13, P117  
Greening LA, 2000, ENER POLICY, V28, P389  
Haas R, 1998, ENERG ECON, V20, P421, DOI 10.1016/S0140-9883(98)00003-6  
HAUSMAN JA, 1979, BELL J ECON, V10, P33, DOI 10.2307/3003318  
HECKMAN JJ, 1978, ECONOMETRICA, V46, P931, DOI 10.2307/1909757  
Khazzoom J. D., 1989, ENERGY J, V10, P157  
Khazzoom J., 1987, ENERGY J, V8, P85  
Khazzoom J. D, 1980, ENERGY J, V1, P21  
McFadden D. L., 1978, SPATIAL INTERACTION  
Nesbakken R, 2001, SCAND J ECON, V103, P165, DOI 10.1111/1467-9442.00236  
SMALL KA, 2006, 050603 UC DEP EC  
SORREL S, 2009, ENER POLICY, P1356  
SORREL S, 2007, UKERCWPTPA2007010  
Sorrell S., 2008, ECOLOGICAL EC, P636  
van den Bergh JCM, 2011, ENVIRON RESOUR ECON, V48, P43, DOI 10.1007/s10640-010-9396-z  
West SE, 2004, J PUBLIC ECON, V88, P735, DOI 10.1016/S0047-2727(02)00186-X

NR 26  
TC 0  
Z9 0  
U1 1  
U2 6  
PU VYSOKA SKOLA EKONOMICKA  
PI PRAGUE  
PA NAM W CHURCHILLA 4, PRAGUE 13067, CZECH REPUBLIC  
SN 0032-3233  
J9 POLIT EKON  
JI Polit. Ekon.  
PY 2011  
VL 59  
IS 3  
BP 359  
EP 378  
DI 10.18267/j.polek.796  
PG 20  
WC Economics; Political Science  
SC Business & Economics; Government & Law  
GA 795RL  
UT WOS:000292993400005  
OA gold  
DA 2018-05-03  
ER

PT S  
AU Sun, Y  
    Feng, LF  
AF Sun Yan  
    Feng Lifang  
BE Zhang, W  
TI Influence of psychological, family and contextual factors on residential  
    energy use behaviour: An empirical study of China  
SO 2010 INTERNATIONAL CONFERENCE ON ENERGY, ENVIRONMENT AND DEVELOPMENT  
    (ICEED2010)  
SE Energy Procedia  
LA English  
DT Proceedings Paper  
CT International Conference on Energy, Environment and Development (ICEED)  
CY DEC 08-09, 2010

CL Kuala Lumpur, MALAYSIA

DE Residential energy use behaviour; Influencing factors; Psychological factors; Family; Contextual factors

ID ENVIRONMENTAL BEHAVIOR

AB The study is reported on the effect of psychological, family and contextual factors on residential energy use behaviour. A survey of 1376 residents was carried out in Dalian, a coastal city in the northeast of China. Results show that energy concern, biospheric value, barriers to behaviour, money saving and personal norm are the most powerful predictors for residential energy use behaviour. It is of Chinese characteristics that the aged has a positive impact on household energy conservation. The paper argues that government and society should make effective instruments to guide residents live in a low carbon lifestyle. (C) 2011 Published by Elsevier Ltd. Selection and peer-review under responsibility of RIUDS

C1 [Sun Yan; Feng Lifang] Dalian Univ Technol, Dalian 116024, Peoples R China.

RP Sun, Y (reprint author), Dalian Univ Technol, 2 Linggong Rd, Dalian 116024, Peoples R China.

EM sunyan@dlut.edu.cn

CR Abrahamse W, 2009, J ECON PSYCHOL, V30, P711, DOI 10.1016/j.joep.2009.05.006

Linden AL, 2002, ENER POLICY, V30, P897, DOI 10.1016/S0301-4215(02)00003-4

Parker P, 2005, LOCAL ENVIRON, V10, P173, DOI 10.1080/1354983052000330761

Poortinga W, 2004, ENVIRON BEHAV, V36, P70, DOI 10.1177/0013916503251466

[?? Qu Ying], 2009, [????, Management Review], V21, P108

SCOTT D, 2000, ENVIRONMENTS, V28, P73

Steel BS, 1996, J ENVIRON MANAGE, V47, P27, DOI 10.1006/jema.1996.0033

Steg L, 2009, J ENVIRON PSYCHOL, V29, P309, DOI 10.1016/j.jenvp.2008.10.004

Steg L, 2008, ENER POLICY, V36, P4449, DOI 10.1016/j.enpol.2008.09.027

Stephenson J, 2010, ENER POLICY, V38, P6120, DOI 10.1016/j.enpol.2010.05.069

Stern P. C., 1999, HUMAN ECOLOGY REV, V6, P81, DOI DOI 10.2307/2083693

Tanner C, 1999, J ENVIRON PSYCHOL, V19, P145, DOI 10.1006/jevp.1999.0121

Tanner C, 2003, PSYCHOL MARKET, V20, P883, DOI 10.1002/mar.10101

Thøgersen J, 1996, ENVIRON BEHAV, V28, P536, DOI 10.1177/0013916596284006

NR 14

TC 0

Z9 1

U1 0

U2 7

PU ELSEVIER SCIENCE BV

PI AMSTERDAM

PA SARA BURGERHARTSTRAAT 25, PO BOX 211, 1000 AE AMSTERDAM, NETHERLANDS

SN 1876-6102

J9 ENRGY PROCED

PY 2011

VL 5

BP 910

EP 915

DI 10.1016/j.egypro.2011.03.161

PG 6

WC Energy & Fuels; Environmental Sciences

SC Energy & Fuels; Environmental Sciences & Ecology

GA BYE95

UT WOS:000298299400161

OA gold

DA 2018-05-03

ER

PT S

AU Wang, LY

Hao, QS

AF Wang, Liying

Hao, Qiushi

BE Sun, D

Sung, WP  
Chen, R  
TI The Existing Architecture Energy-saving Technologies' Application in the Residential Community's Transformation  
SO FRONTIERS OF GREEN BUILDING, MATERIALS AND CIVIL ENGINEERING, PTS 1-8  
SE Applied Mechanics and Materials  
LA English  
DT Proceedings Paper  
CT International Conference on Green Building, Materials and Civil Engineering (GBMCE 2011)  
CY AUG 22-23, 2011  
CL Shangri La, PEOPLES R CHINA  
SP Control Engn & Informat Sci Res Assoc, Int Frontiers Sci & Technol Res Assoc, Trans Tech Publicat, Chongqing Xueya Conf Cater Co Ltd  
DE Shield machine; Carrier; Finite Element method; Strength  
AB In this thesis, it starts from the status of China's energy consumption and energy efficiency application, analysis our country's existing architecture common problems and causes, combined with engineering practice, put forward the technological measures to the existing architecture energy-saving's transformation.  
C1 [Wang, Liying] Changchun Inst, Changchun Coll Architecture & Design, 3066 Comrade St, Changchun, Jilin Province, Peoples R China.  
[Hao, Qiushi] Haerbin Inst Technol, Harerbin, Heilongjiang, Peoples R China.  
RP Wang, LY (reprint author), Changchun Inst, Changchun Coll Architecture & Design, 3066 Comrade St, Changchun, Jilin Province, Peoples R China.  
EM Wly\_3358@sohu.com  
CR Li Jiancheng, 2006, ARCHITECTURAL DESIGN  
[Anonymous], RES INT BUILD DES BU  
Zhang Hai-Wen, 2007, JILIN ARCHITECTURAL  
NR 3  
TC 0  
Z9 0  
U1 2  
U2 3  
PU TRANS TECH PUBLICATIONS LTD  
PI DURNTEN-ZURICH  
PA KREUZSTRASSE 10, 8635 DURNTEN-ZURICH, SWITZERLAND  
SN 1660-9336  
BN 978-3-03785-203-3  
J9 APPL MECH MATER  
PY 2011  
VL 71-78  
BP 82  
EP +  
DI 10.4028/www.scientific.net/AMM.71-78.82  
PN 1-8  
PG 2  
WC Construction & Building Technology; Engineering, Civil; Materials Science, Multidisciplinary  
SC Construction & Building Technology; Engineering; Materials Science  
GA BBJ20  
UT WOS:000307034500016  
DA 2018-05-03  
ER  
FN Clarivate Analytics Web of Science  
VR 1.0  
PT B  
AU Xiao, J  
Lin, BR

Zhu, YX  
AF Xiao, J.  
Lin, B. R.  
Zhu, Y. X.  
BE Zhang, X  
Li, Z  
Gao, N  
Zhou, X  
TI THE OPERATION ENERGY CONSUMPTION AND ENERGY-SAVING TECHNOLOGIES OF THREE  
GREEN BUILDINGS IN CHINA  
SO 7TH INTERNATIONAL SYMPOSIUM ON HEATING, VENTILATING AND AIR  
CONDITIONING, PROCEEDINGS OF ISHVAC 2011, VOLS I-IV  
LA English  
DT Proceedings Paper  
CT 7TH International Symposium on Heating, Ventilating and Air  
Conditioning, ISHVAC 2011  
CY NOV 06-09, 2011  
CL Shanghai, PEOPLES R CHINA  
SP TONGJI UNIV, Tsinghua Univ, Univ Hong Kong  
DE Green buildings; Energy-saving technologies; Operation energy  
consumption; Air-condition system performance  
AB Although amounts of green buildings have been built in China in recent 8 years, there lacks systematized  
research on their operation performances. An on -site investigation and measurement of 3 green office  
buildings in China has been carried out in this paper, covering study of envelope thermal performance,  
comparison of application of energy -efficient technologies and the actual operation energy consumption  
data, evaluation on the performance of the temperature and humidity independent control air-condition  
systems in the buildings. The conclusion is that the green office buildings concerned in the study are  
energy-efficient, but with quite low occupancy rate. Passive technologies such as natural ventilation and  
natural lighting perform quite well. Based on the value of coefficient of performance (COP), the air-  
condition systems for building SH and building BJ perform better than that of building SZ.  
C1 [Xiao, J.; Lin, B. R.; Zhu, Y. X.] Tsinghua Univ, Dept Bldg Sci, Beijing 100084, Peoples R China.  
RP Xiao, J (reprint author), Tsinghua Univ, Dept Bldg Sci, Beijing 100084, Peoples R China.  
EM xiao\_juan.rain@yahoo.com.cn  
CR Cathy T., 2008, ENERGY PERFORMANCE L  
Thomsen KE, 2005, ENER G BUILDINGS, V37, P111, DOI 10.1016/j.enbuild.2004.01.036  
THUBERC, 2009, 2009 ANN REP CHIN BU, P133  
NR 3  
TC 0  
Z9 0  
U1 0  
U2 0  
PU TONGJI UNIV PRESS  
PI SHANGHAI  
PA EDITORIAL BOARD 1239 SIPING RD, SHANGHAI, PEOPLES R CHINA  
BN 978-962-85138-0-2  
PY 2011  
BP 64  
EP 69  
PG 6  
WC Construction & Building Technology  
SC Construction & Building Technology  
GA BH0EE  
UT WOS:000394721200011  
DA 2018-05-03  
ER  
  
PT S  
AU Yang, J

Tang, ZH  
Song, Y  
AF Yang, Jie  
Tang, Zhonghua  
Song, Yu  
BE Li, G  
Huang, Y  
Chen, C

TI Probe into the Problem of Water-Saving and Energy-Saving in Building

SO ADVANCED BUILDING MATERIALS, PTS 1-4

SE Advanced Materials Research

LA English

DT Proceedings Paper

CT 1st International Conference on Civil Engineering, Architecture and

Building Materials (CEABM 2011)

CY JUN 18-20, 2011

CL Haikou, PEOPLES R CHINA

SP Hainan Univ, Coll Civil Engr & Architecture, Guizhou Univ, Coll Civil & Architecture Engr, Hainan Soc

Theoret & Appl Mech

DE water supply and drainage; Energy-saving; water-saving

AB With the fast development of economy in China, some questions have come out gradually, and more and more obviously. For instance the energy in short supply, the water resource exhausted. I have made a simple analysis on the issue that some extant energy is wasted and the water resource wasted in the water supply and sewerage engineering in China, and have put forward some corresponding measures, such as full use of available municipal water supply network head, reasonable control of the flow of overpressure and decompression cost saving measures, promotion of the technology of water reuse and rainwater reuse and other measures. These measures can effectively reduce the energy and water waste in the water supply and sewerage engineering.

C1 [Yang, Jie; Tang, Zhonghua; Song, Yu] SW Univ Sci & Technol, Sch Civil Engr & Architecture, Mianyang 621010, Sichuan, Peoples R China.

RP Yang, J (reprint author), SW Univ Sci & Technol, Sch Civil Engr & Architecture, Mianyang 621010, Sichuan, Peoples R China.

EM chyangjie2006@126.com; tangzhonghua@126.com; cbe0520@126.com

CR Cheng Hongwei, 2007, FUJ PROV WAT SUPPL D, P1301

He Qiang, 2008, ENV ENG J, P63

Jiang Huimin, 2005, WATER SUPPLY DRAINAG, P109

Hong Yan, 2010, SCI TECHNOLOGY INNOV, P37

Sun Ying, 2010, NEW TECHNOLOGIES PRO, P148

NR 5

TC 0

Z9 0

U1 0

U2 15

PU TRANS TECH PUBLICATIONS LTD

PI STAFA-ZURICH

PA LAUBLSRUTISTR 24, CH-8717 STAFA-ZURICH, SWITZERLAND

SN 1022-6680

BN 978-3-03785-127-2

J9 ADV MATER RES-SWITZ

PY 2011

VL 250-253

IS 1-4

BP 3275

EP 3278

DI 10.4028/www.scientific.net/AMR.250-253.3275

PG 4

WC Construction & Building Technology; Engineering, Environmental;  
Engineering, Civil

SC Construction & Building Technology; Engineering  
 GA BAF47  
 UT WOS:000304018401230  
 DA 2018-05-03  
 ER

PT B

AU Yoshino, H  
 Hu, T  
 Levine, M  
 Jiang, Y  
 Pietilainen, J  
 Corgnati, S  
 Ghiaus, C  
 Andre, P  
 van der Aa, A

AF Yoshino, H.  
 Hu, T.  
 Levine, M.  
 Jiang, Y.  
 Pietilainen, J.  
 Corgnati, S.  
 Ghiaus, C.  
 Andre, P.  
 van der Aa, A.

BE Zhang, X  
 Li, Z  
 Gao, N  
 Zhou, X

TI OVERVIEW OF IEA/ECBCS/ANNEX 53 "TOTAL ENERGY USE IN BUILDINGS - ANALYSIS AND EVALUATION METHODS-"

SO 7TH INTERNATIONAL SYMPOSIUM ON HEATING, VENTILATING AND AIR CONDITIONING, PROCEEDINGS OF ISHVAC 2011, VOLS I-IV

LA English

DT Proceedings Paper

CT 7TH International Symposium on Heating, Ventilating and Air Conditioning, ISHVAC 2011

CY NOV 06-09, 2011

CL Shanghai, PEOPLES R CHINA

SP TONGJI UNIV, Tsinghua Univ, Univ Hong Kong

DE Overview; IEA/ ECBCS/Annex 53; Subtasks; Present status

AB One of the most significant barriers for achieving the goal of substantially improving energy efficiency of buildings is the lack of knowledge about the factors determining the real energy use. There is often a significant discrepancy between the designed and the real total energy use in buildings, in which a complex array of factors play a significant role, including the user/occupant behavior. The reasons for this discrepancy are generally poorly understood, and often have more to do with the role of human behavior than the building design. For that, the IEA/ECBCS/Annex entitled as "Total Energy use in Buildings - Analysis and evaluation methods-" was initiated in the November 2009 and started on first of January, 2010 as working phase. The ultimate outcome of this annex is to strengthen the robust prediction of energy usage in buildings, thus enabling the proper assessment of short- and long-term energy measures, policies, and technologies. This paper deals with Annex 53 research works, present status and expected outcomes.

C1 [Yoshino, H.; Hu, T.] Tohoku Univ, Grad Sch Engn, Sendai, Miyagi 9808579, Japan.

[Levine, M.] Lawrence Berkley Natl Lab, Berkeley, CA USA.

[Jiang, Y.] Tsinghua Univ, Beijing, Peoples R China.

[Pietilainen, J.] VTT Tech Res Ctr Finland, Espoo, Finland.

[Corgnati, S.] Politecn Torino, Turin, Italy.

[Ghiaus, C.] INSA Lyon, CETHIL, Lyon, France.

[Andre, P.] Univ Liege, Liege, Belgium.

[van der Aa, A.] Cauberg Huygen Consulting Engineers, Maastricht, Netherlands.  
RP Yoshino, H (reprint author), Tohoku Univ, Grad Sch Engr, Sendai, Miyagi 9808579, Japan.  
EM yoshino@sabine.pln.archi.tohoku.ac.jp  
OI Ghiaus, Christian/0000-0001-5561-1245  
FU IEA/ECBCS (International Energy Agency/Energy Conservation in Buildings  
and Community Systems)  
FX This search was supported by IEA/ECBCS (International Energy  
Agency/Energy Conservation in Buildings and Community Systems). Authors  
also would like to give many thanks to executive committee members of  
ECBCS and participants from different countries involved in this  
project.  
CR Yoshino H, 2010, NEWSLETTER IEA ECBCS, V53  
NR 1  
TC 0  
Z9 0  
U1 1  
U2 1  
PU TONGJI UNIV PRESS  
PI SHANGHAI  
PA EDITORIAL BOARD 1239 SIPING RD, SHANGHAI, PEOPLES R CHINA  
BN 978-962-85138-0-2  
PY 2011  
BP 77  
EP 82  
PG 6  
WC Construction & Building Technology  
SC Construction & Building Technology  
GA BH0EE  
UT WOS:000394721200013  
DA 2018-05-03  
ER

PT B  
AU Du Bois, E  
Horvath, I  
Van Doorselaer, K  
AF Du Bois, Els  
Horvath, Imre  
Van Doorselaer, Karine  
BE Horvath, I  
Mandorli, F  
Rusak, Z

TI CRITICAL REVIEW OF SMART ENERGY SAVING IN HOUSEHOLD ELECTRONICS  
SO TOOLS AND METHODS OF COMPETITIVE ENGINEERING, VOLS 1-2  
LA English  
DT Proceedings Paper  
CT 8th International Symposium on Tools and Methods of Competitive  
Engineering (TMCE 2010)  
CY APR 12-16, 2010  
CL Ancona, ITALY  
DE Design of household electronics; smart energy saving; ubiquitous  
controllers; forecasting software tool; trade-off calculation  
ID ELECTRICITY CONSUMPTION; DOMESTIC APPLIANCES; PRODUCT DEFINITION;  
DESIGN; SYSTEMS; METHODOLOGY; INTEGRATION; INTERFACES; SIMULATION;  
EQUIPMENT  
AB This research combines the necessity of energy saving and the opportunities of applying ubiquitous  
technologies. More precisely, its objective is to use ubiquitous technologies to provide smart control  
functions in electronic consumer products to save energy. This paper investigates the status of knowledge



related to the development of software tools that are able to assist designers in making decisions on smart energy saving. This paper brings together five seemingly not interrelated knowledge domains and synthesizes a concept for a trade-off forecasting software tool. Trade-off calculation is important because, on the one hand, smart controllers increase the cost of the product, and on the other hand, they consume extra energy. If there are no direct economic advantages, designers should not apply ubiquitous technologies for energy saving in electronic appliances. A major finding of the completed literature study is that the research efforts into this direction are scarce, and just very few system concepts have been proposed. Based on the aggregated knowledge, this paper tries to circumscribe a predictive theory with the intention to underpin the functional and structural framework of the sought software tool. The compiled theory explains not only how the tool can forecast, but also how designers can use it. The follow-up research will further refine and extend the theory, and will transform it to a comprehensive specification of the technical framework.

C1 [Du Bois, Els; Van Doorselaer, Karine] Artesis Univ Coll Antwerp, Inst Prod Dev, Antwerp, Belgium.

[Horvath, Imre] Delft Univ Technol, Fac Ind Design Engn, Delft, Netherlands.

RP Du Bois, E (reprint author), Artesis Univ Coll Antwerp, Inst Prod Dev, Antwerp, Belgium.

EM els.dubois@artesis.be; i.horvath@tudelft.nl;

karine.vandoorselaer@artesis.be

CR Abdulrezak M, 2002, KNOWL-BASED SYST, V15, P177

Abowd G. D., 2000, ACM Transactions on Computer-Human Interaction, V7, P29, DOI 10.1145/344949.344988

Armstrong J.S., 2001, PRINCIPLES FORECASTI

Azadeh A, 2007, ENER POLICY, V35, P5229, DOI 10.1016/j.enpol.2007.04.020

Baldauf M, 2007, INT J AD HOC UBIQ CO, V2, P263, DOI 10.1504/IJAHUC.2007.014070

Bars R, 2006, ANNU REV CONTROL, V30, P19, DOI 10.1016/j.arcontrol.2006.01.006

Bheemalingaiah M., 2009, IJ COMMUNICATIONS N, V2, P91

Bogliolo A, 2004, P IEEE, V92, P1308, DOI 10.1109/JPROC.2004.831207

Brandon G, 1999, J ENVIRON PSYCHOL, V19, P75, DOI 10.1006/jev.1998.0105

Choi JK, 2008, J ENG DESIGN, V19, P431, DOI 10.1080/09544820701749116

Dalton A. B., 2003, P USENIX WORKSH HOTO, P26

Elias E.W.A., 2009, P 16 CIRP INT C LIF

Farber S., 2000, J ENV SCI POLICY, V3, P491

Firth S, 2008, ENER BUILDINGS, V40, P926, DOI 10.1016/j.enbuild.2007.07.005

Fischer C, 2008, ENER EFFIC, V1, P79, DOI 10.1007/s12053-008-9009-7

Fishwick PA, 1998, IIE TRANS, V30, P811, DOI 10.1080/07408179808966527

Girod L., 2006, P 8 IEEE INT S MULT, P567

Han J, 2012, MOR KAUF D, P1

Havinga PJM, 2000, J SYST ARCHITECT, V46, P1, DOI 10.1016/S1383-7621(98)00057-5

Herring H, 2007, TECHNOVATION, V27, P194, DOI 10.1016/j.technovation.2006.11.004

Hopper N, 2009, ENER EFFIC, V2, P1, DOI 10.1007/s12053-008-9030-x

Horvath I., 2009, P ASME 2009 SAN DIEG

Horvath I, 2009, EUR J ENG EDUC, V34, P465, DOI 10.1080/03043790902939783

HUA S, 2003, P ICCAD, P26

Jiang Shaofei, 2007, Chinese Journal of Mechanical Engineering, V43, P205, DOI 10.3901/JME.2007.06.205

Kawamoto K, 2002, ENERGY, V27, P255, DOI 10.1016/S0360-5442(01)00084-6

Li HM, 2005, P ANN INT IEEE EMBS, P2451

Loh P. K., 2009, INT J COMMUNICATIONS, V2, P91

MACFARLANE AGJ, 1989, AUTOMATICA, V25, P165, DOI 10.1016/0005-1098(89)90070-8

Maier JRA, 2009, DESIGN STUD, V30, P393, DOI 10.1016/j.destud.2009.01.002

Mann S., 1996, P 4 ACM INT C MULT B

MATHIS A, 1995, PATTERN RECOGN, V28, P1459, DOI 10.1016/0031-3203(94)00150-K

Mok H.S., 2007, P 5 IFIP WG 10 2 INT, P293

Niazi A, 2006, J MANUF SCI E-T ASME, V128, P563, DOI 10.1115/1.2137750

Nitzsche N, 2003, J ROBOTIC SYST, V20, P549, DOI 10.1002/rob.10105

Poortinga W, 2004, ENVIRON BEHAV, V36, P70, DOI 10.1177/0013916503251466

Poortinga W, 2003, J ECON PSYCHOL, V24, P49, DOI 10.1016/S0167-4870(02)00154-X

Raghavan P., 2008, P 3 INT C HIGH PERF, V4917, P193

Rodriguez E., 2005, P 4 INT S ENV CONSC, P54, DOI DOI 10.1109/ECODIM.2005.1619166

- Sargent RG, 2005, PROCEEDINGS OF THE 2005 WINTER SIMULATION CONFERENCE, VOLS 1-4, P130, DOI 10.1109/WSC.2005.1574246
- Schilit B., 1994, P WORKSH MOB COMP SY, P85, DOI DOI 10.1109/WMCSA.1994.16
- Sinha R., 2001, J COMPUT INF SCI ENG, V1, P84, DOI DOI 10.1115/1.1344877]
- Starnier T., 2001, MICRO IEEE, V21, P54, DOI DOI 10.1109/40.946683
- Strijk R., 2004, P EL GOES GREEN BERL, P1
- Sullivan C. R., 1994, Proceedings 1994 IEEE International Symposium on Electronics and the Environment. ISEE - 1994 (Cat. No.94CH3386-0), P261, DOI 10.1109/ISEE.1994.337248
- Tseng MM, 1998, CONCURRENT ENG-RES A, V6, P145, DOI 10.1177/1063293X9800600205
- Ullmer B, 2000, IBM SYST J, V39, P915, DOI 10.1147/sj.393.0915
- Van der Vegte W.F., 2009, THESIS
- Vastamaki R, 2005, PERS UBIQUIT COMPUT, V9, P250, DOI 10.1007/s00779-004-0326-3
- Wang H., 2008, INT J COMMUNICATIONS, V3, P207
- Wood G, 2003, ENERG BUILDINGS, V35, P821, DOI 10.1016/S0378-7788(02)00241-4
- Yan W, 2005, EXPERT SYST, V22, P241, DOI 10.1111/j.1468-0394.2005.00315.x
- Yohanis Y.G., 2000, INT J SOLAR ENERGY, V20, P207

NR 53

TC 0

Z9 0

U1 0

U2 0

PU DELFT UNIV TECHNOLOGY, FAC INDUST DESIGN ENG

PI DELFT

PA LANDBERGSTRAAT 15, DELFT, 2628 CE, NETHERLANDS

BN 978-90-5155-060-3

PY 2010

BP 1147

EP 1160

PG 14

WC Engineering, Industrial

SC Engineering

GA BG9SI

UT WOS:000393727100090

DA 2018-05-03

ER

PT B

AU Hartungi, R

Pye, C

AF Hartungi, Rusdy

Pye, Chris

BE Hajek, P

Tywoniak, J

Lupisek, A

Ruzicka, J

Sojkova, K

TI ENERGY EFFICIENCY PRACTICE IN OFFICE BUILDING

SO CESB 10: CENTRAL EUROPE TOWARDS SUSTAINABLE BUILDING - FROM THEORY TO PRACTICE

LA English

DT Proceedings Paper

CT Conference on Central Europe towards Sustainable Building

CY JUN, 2010

CL Prague, CZECH REPUBLIC

SP Czech Techn Univ, CIDEAS, Czech Sustainable Building Soc, iiSBE, UNEP SBSI, CIB

DE Sustainable Building; Office Building; Energy Conservation; Building

Services; Building Regulation

ID CONSERVATION; PERFORMANCE

AB The conflicting demands of growing building energy use against targets for reducing carbon emissions coming from the building sector has gained widespread attention. Energy efficiency is one of the few techniques which has been used to tackle the great concern of increased energy use and carbon emissions in many countries. Energy efficiency is considered a key element of energy conservation and a contributor to the reduction of carbon emission in many countries throughout the world, not least because of the high proportion of the total energy used by the buildings the building sector. Some countries have now introduced building regulations concerning energy conservation and the use of energy efficiency measures.

In the UK, the government has introduced the Building Regulations Approved Document Part L regarding the conservation of fuel and power. This paper presents a showcase of a newly built office buildings in the UK and demonstrates how the energy efficiency technology in buildings might contribute towards energy conservation and fully comply with the building regulations. A large array of energy efficiency solutions are used such as a ventilation system with an efficient high heat recovery system, lighting controls linked to daylighting, etc. Using energy efficiency technology the office building in case study has shown compliance with the building regulations and has also conserved energy. This paper will demonstrate that energy conservation and compliance with building regulations are achieved through early incorporation into the building design.

The show case of an office building in this paper brings practical applications to building services engineers and consulting engineers who might want to design an office building that conserves the energy. Certainly, Part L of the Building Regulations has statutory standing as legislation in the UK, however this regulation has been amended and synchronised with the Directive on the Energy Performance of Buildings (EPBD) set up by the European Parliament and Council on energy efficiency of buildings. So this study will not be only useful for building engineers in the UK but also in the EU as well as any part of the globe which use EPBD as the basis to develop local energy codes.

C1 [Hartungi, Rusdy; Pye, Chris] Univ Cent Lancashire, Sch Built & Nat Environm, Preston PR1 2HE, Lancs, England.

RP Hartungi, R (reprint author), Univ Cent Lancashire, Sch Built & Nat Environm, Preston PR1 2HE, Lancs, England.

EM RHartungi@uclan.ac.uk; CJPyel@uclan.ac.uk

CR Khudhair Amar M, 2004, ENERGY CONV MANAGE, V45, P263

Balaras CA, 2003, ENER BUILDINGS, V35, P1105, DOI 10.1016/j.enbuild.2003.09.006

Balaras CA, 2002, ENER BUILDINGS, V34, P135, DOI 10.1016/S0378-7788(01)00107-4

Canbay CS, 2004, ENER BUILDINGS, V36, P587, DOI 10.1016/j.enbuild.2004.01.031

Chirarattananon S, 2003, ENER CONVERS MANAGE, V44, P743, DOI 10.1016/S0196-8904(02)00082-1

Fayaza R., 2009, APPL ENERGY

HARTUNGI R, 2009, J BUILDING APPRAISAL, V4, P287

HARTUNGI R, 2009, P 1 INT EX LIF CYCL

Heidari S, 2002, ENER BUILDINGS, V34, P607, DOI 10.1016/S0378-7788(02)00011-7

Khan KH, 2004, APPL ENER, V77, P15, DOI 10.1016/S0306-2619(03)00100-4

Long ES, 2005, BUILD ENVIRON, V40, P537, DOI 10.1016/j.buildenv.2004.06.013

Loveday DL, 2002, ENER BUILDINGS, V34, P573, DOI 10.1016/S0378-7788(02)00007-5

Markis T, 2007, ENER BUILDINGS, V39, P404, DOI 10.1016/j.enbuild.2006.08.006

Priambodo A, 2001, ENER CONVERS MANAGE, V42, P1335, DOI 10.1016/S0196-8904(00)00127-8

Santamouris M, 2002, BUILD ENVIRON, V37, P575, DOI 10.1016/S0360-1323(02)00004-5

Tzikopoulos AF, 2005, ENER BUILDINGS, V37, P529, DOI 10.1016/j.enbuild.2004.09.002

Warnken J, 2004, ECOL ECON, V48, P125, DOI 10.1016/j.ecolecon.2003.08.007

NR 17

TC 0

Z9 0

U1 0

U2 9

PU CZECH TECHNICAL UNIV PRAGUE

PI PRAGUE 6

PA ZIKOVA 4, PRAGUE 6 166 35, CZECH REPUBLIC

BN 978-80-247-3624-2

PY 2010

BP 259

EP 262

PG 4

WC Construction & Building Technology; Ecology; Energy & Fuels;  
Engineering, Civil; Environmental Sciences

SC Construction & Building Technology; Environmental Sciences & Ecology;  
Energy & Fuels; Engineering

GA BTY08

UT WOS:000288408300056

DA 2018-05-03

ER

PT B

AU Li, C

Li, ZR

Yao, WX

AF Li, Cui

Li, Zheng Rong

Yao, Wan Xiang

BE Liu, Q

Ou, Y

Qu, M

Sun, K

Tang, L

Tao, L

Wang, Y

Zeng, C

Zhang, Y

TI STUDY INFLUENCES OF INDIVIDUAL BEHAVIOR CONSCIOUS ON ENERGY-SAVING IN  
BUILDING

SO PROCEEDINGS OF THE SECOND INTERNATIONAL POSTGRADUATE CONFERENCE ON  
INFRASTRUCTURE AND ENVIRONMENT, VOL 1

LA English

DT Proceedings Paper

CT 2nd International Postgraduate Conference on Infrastructure and  
Environment

CY JUN 01-02, 2010

CL Hong Kong Polytechn Univ, Hong Kong, PEOPLES R CHINA

SP Hong Kong Polytechn Univ, Fac Construct & Land Use

HO Hong Kong Polytechn Univ

DE energy-saving; awareness; individual behavior; energy consumption

ID CONSERVATION; POLICY; CONSUMPTION; HOUSEHOLDS; DESIGN

AB Energy-saving has become more and more important as rapid economic growth and urbanization development, Electric appliances, plant management and people's energy usage habits have an effect on energy consumption in buildings. All the people of society take part in using the building directly, therefore, the behavior of all people who utilize the energy should be take into account. The behavioral consciousness of the individual has an immense impact on energy-saving. This paper will discuss public knowledge of energy-saving related information in buildings. Take Shanghai, for example. Awareness of energy-saving and the stimulating factors of individual behavior were investigated through questionnaire survey. Of the total random sample of 400 people, 364 were found available. The results of the survey indicate that public knowledge and awareness of energy-saving in buildings is not good enough, and the lack of such awareness leads to a low acceptance of energy efficiency policy. The reason that the public pays attention to energy-savings in buildings is often because of home energy bills. Media and colleagues are ways the public gets energy-efficiency related information. Compelling policies are good for implementing energy-savings in buildings. The purpose of this study is to enhance the public people awareness of energy efficient, and can help the government to carry out energy-saving plans.

C1 [Li, Cui; Li, Zheng Rong; Yao, Wan Xiang] Tongji Univ, Coll Mech Engn, Shanghai, Peoples R China.

EM sanyishui1982@163.com

FU Science and Technology Commission of Shanghai Municipality [08DZ1207800]

FX This study supported by Science and Technology Commission of Shanghai

Municipality the number of this program is 08DZ1207800. It is about green architecture technology applicability in occupant environment of zoology in Shanghai.

- CR Abrahamse Wolcje, 2009, EC PSYCHOL, V30, P711  
 Abrahamse Wokje, 2005, ENV PSYCHOL, V25, P273  
 Abrahamse Wokje, 2007, ENV PSYCHOL, V27, P265  
 Attari Shahzeen Z., DECREASING DEMAND AT  
 Belk Russell, 1982, ADV CONSUM RES, V9, P306  
 Black J. S., 1985, J APPL SOC PSYCHOL, V28, P675  
 Carlsson-Kanyama A, 2007, ENERG POLICY, V35, P2163, DOI 10.1016/j.enpol.2006.06.018  
 Chen Yi Ming, 2008, ZHEJIANG STAT, V10, P33  
 Cohen C, 2005, ENERG POLICY, V33, P555, DOI 10.1016/j.enpol.2003.08.021  
 Dias RA, 2004, ENERG POLICY, V32, P1339, DOI 10.1016/S0301-4215(03)00100-9  
 Dulleck U, 2004, ENERG POLICY, V32, P1025, DOI 10.1016/S0301-4215(03)00060-0  
 Gardner G.T., 1996, ENV PROBLEMS HUMAN B  
 Glicksman LR, 2001, ANNU REV ENERG ENV, V26, P83, DOI 10.1146/annurev.energy.26.1.83  
 [?? GUO Qi], 2007, [?????????, China Population 糧 esources and Environment], V17, P149  
 Linda S, 2008, ENERG POLICY, V36, P4449  
 Linden AL, 2006, ENERG POLICY, V34, P1918, DOI 10.1016/j.enpol.2005.01.015  
 Nakagami H, 1996, ENERGY, V21, P1157, DOI 10.1016/0360-5442(96)00071-0  
 Ouyang JL, 2009, ENERG BUILDINGS, V41, P711, DOI 10.1016/j.enbuild.2009.02.003  
 Poortinga W, 2003, J ECON PSYCHOL, V24, P49, DOI 10.1016/S0167-4870(02)00154-X  
 SAMUELSON CD, 1990, SOC BEHAV, V5, P207  
 Sardianou E, 2007, ENERG POLICY, V35, P3778, DOI 10.1016/j.enpol.2007.01.020  
 Shui B., 2005, ENERG POLICY, V33, P197  
 STERN PC, 1981, AM PSYCHOL, V36, P329, DOI 10.1037/0003-066X.36.4.329  
 Vlek C. A. J., 2007, ENERGY CONSERVATION  
 Wood G, 2007, ENERG BUILDINGS, V39, P495, DOI 10.1016/j.enbuild.2006.06.009  
 Wood G, 2003, ENERG BUILDINGS, V35, P821, DOI 10.1016/S0378-7788(02)00241-4  
 Zhang Hui, 2005, MARK RES, V10, P15
- NR 27  
 TC 0  
 Z9 0  
 U1 0  
 U2 0
- PU HONG KONG POLYTECHNIC UNIV, FAC CONSTRUCTION & LAND USE  
 PI HUNG HOM  
 PA HONG KONG POLYTECHNIC UNIV, FAC CONSTRUCTION & LAND USE, HUNG HOM,  
 KOWLOON 00000, HONG KONG
- BN 978-988-17311-3-5  
 PY 2010  
 BP 40  
 EP 50  
 PG 11  
 WC Engineering, Civil  
 SC Engineering  
 GA BG8RT  
 UT WOS:000392691700005  
 DA 2018-05-03  
 ER
- PT S  
 AU Pan, LL  
 Chen, T  
 Jia, QS  
 Yuan, RX  
 Wang, HT  
 Ding, R

AF Pan, L. L.  
 Chen, T.  
 Jia, Q. S.  
 Yuan, R. X.  
 Wang, H. T.  
 Ding, R.  
 BE Lu, JWZ  
 Leung, AYT  
 Iu, VP  
 Mok, KM

TI An Occupant Behavior Model for Building Energy Efficiency and Safety  
 SO ISCM II AND EPMESC XII, PTS 1 AND 2

SE AIP Conference Proceedings

LA English

DT Proceedings Paper

CT 2nd International Symposium on Computational Mechanics

CT 12th International Conference on the Enhancement and Promotion of  
 Computational Methods in Engineering and Science

CY NOV 30-DEC 03, 2009

CY DEC 02-03, 2009

CL Hong Kong, PEOPLES R CHINA

CL Macau, PEOPLES R CHINA

SP K C Wong Educ Fdn, Macao Fdn, Macao Govt Tourist Off, Sci & Technol Dev Fund Macao SAR

SP K C Wong Educ Fdn, Macao Fdn, Macao Govt Tourist Off, Sci & Technol Dev Fund Macao SAR

DE Occupant behavior; Energy Saving; Building Control; Safety Evacuation

ID CONSUMPTION; SUMMER

AB An occupant behavior model is suggested to improve building energy efficiency and safety. This paper provides a generic outline of the model, which includes occupancy behavior abstraction, model framework and primary structure, input and output, computer simulation results as well as summary and outlook.

Using information technology, now it's possible to collect large amount of information of occupancy. Yet this can only provide partial and historical information, so it's important to develop a model to have full view of the researched building as well as prediction. We used the infrared monitoring system which is set at the front door of the Low Energy Demo Building (LEDB) at Tsinghua University in China, to provide the time variation of the total number of occupants in the LEDB building. This information is used as input data for the model. While the RFID system is set on the 1(st) floor, which provides the time variation of the occupants' localization in each region. The collected data are used to validate the model. The simulation results show that this presented model provides a feasible framework to simulate occupants' behavior and predict the time variation of the number of occupants in the building. Further development and application of the model is also discussed.

C1 [Pan, L. L.; Chen, T.] Tsinghua Univ, Ctr Publ Safety Res, Dept Engr Phys, Beijing, Peoples R China.

[Jia, Q. S.; Yuan, R. X.; Wang, H. T.; Ding, R.] Tsinghua Univ, Ctr Intelligent & Networked Syst, Beijing, Peoples R China.

RP Pan, LL (reprint author), Tsinghua Univ, Ctr Publ Safety Res, Dept Engr Phys, Beijing, Peoples R China.

EM Panll02@mails.thu.edu.cn; chentao@tsinghua.edu.cn

FU UTRC (United Technologies Research Centre)

FX The contents presented in this paper were supported partially by the  
 Research Grants from UTRC (United Technologies Research Centre).

CR Al-Mumin A, 2003, ENERGBUILDINGS, V35, P549, DOI 10.1016/S0378-7788(02)00167-6

Bryan JL, 1999, FIRE MATER, V23, P249

Emery AF, 2006, ENERGY, V31, P677, DOI 10.1016/j.energy.2005.04.006

Gwynne S, 1999, FIRE MATER, V23, P383, DOI 10.1002/(SICI)1099-1018(199911/12)23:6<383::AID-FAM715>3.0.CO;2-2

Haldi F, 2008, BUILD ENVIRON, V43, P2163, DOI 10.1016/j.buildenv.2008.01.003

HELBING D, 1995, PHYS REV E, V51, P4282, DOI 10.1103/PhysRevE.51.4282

Iwashita G, 1997, ENERGBUILDINGS, V25, P195, DOI 10.1016/S0378-7788(96)00994-2

Leephakpreeda T, 2005, BUILD ENVIRON, V40, P881, DOI 10.1016/j.buildenv.2004.08.026

PAN LL, 2008, ISSST C P, P483

Tanimoto J, 2008, BUILD ENVIRON, V43, P610, DOI 10.1016/j.buildenv.2006.06.034

Yun GY, 2008, BUILD ENVIRON, V43, P1471, DOI 10.1016/j.buildenv.2007.08.001  
NR 11  
TC 0  
Z9 0  
U1 1  
U2 16  
PU AMER INST PHYSICS  
PI MELVILLE  
PA 2 HUNTINGTON QUADRANGLE, STE 1NO1, MELVILLE, NY 11747-4501 USA  
SN 0094-243X  
BN 978-0-7354-0778-7  
J9 AIP CONF PROC  
PY 2010  
VL 1233  
BP 191  
EP +  
DI 10.1063/1.3452164  
PG 2  
WC Engineering, Civil; Engineering, Mechanical; Mathematics, Applied;  
Mechanics  
SC Engineering; Mathematics; Mechanics  
GA BRL16  
UT WOS:000283003800031  
DA 2018-05-03  
ER

PT S

AU Zhivov, AM

Liesen, R

Fisher, D

Hand, J

Wilson, B

AF Zhivov, Alexander M.

Liesen, Richard

Fisher, Dan

Hand, Jon

Wilson, Barry

GP ASHRAE

TI Screening of Energy Efficient Technologies for Industrial Buildings'  
Retrofits

SO ASHRAE TRANSACTIONS 2010, VOL 116, PT 2

SE ASHRAE Transactions

LA English

DT Proceedings Paper

CT ASHRAE Transactions 2010 Annual Conference

CY JUN 26-30, 2010

CL Albuquerque, NM

AB During the past few years, U.S. Army Corps of Engineers' Engineer Research and Development Center (ERDC) has led energy and process optimization initiatives to help Department of Defense installations to meet energy efficiency and environmental compliance requirements and to create an improved work environment. This effort was also a part of the IEA-ECBCS "International Energy Agency-Energy Conservation in Buildings and Community Systems" Annex 46, "Holistic Assessment Tool-kit on Energy Efficient Retrofit Measures for Government Buildings-EnERGO."

One of the important tasks of both programs was to analyze a series of international experiences of retrofitted industrial buildings and based on these best practice examples to develop a database of Promising energy saving technologies and measures (current, proven, well known or underused). The database includes technologies/measures that relate to building envelope, internal load reduction, lighting, HVAC systems, energy consuming processes in the building, supplemental energy systems (e.g.,

compressed air steam system), etc. The listed technologies and measures cover a wide spectrum, from proven operations and maintenance procedures to installation of technologies that have recently entered the market and are not yet well understood by end users, engineers, and decision makers. They also span a wide range of capital investment costs, from no cost/low cost measures to installations that may require several hundred thousand dollars of investment. Applicability and savings from using some energy conservation technologies and measures are not affected by outdoor climate conditions, while others are climate dependent.

Careful evaluation of candidate energy conservation measures for applicability and cost efficiency is critical to building energy managers, engineers, contractors, and decision makers in crafting and implementing successful energy conservation building retrofits. This paper presents a simulation based methodology for screening energy conservation technologies and measures for representative conditions (building type, climatic conditions, energy costs, etc.) The study demonstrates the feasibility of applying the methodology using an example of heated and ventilated (not air-conditioned) industrial buildings for six selected energy conservation measures. A simple payback is calculated using electricity and gas savings throughout a year-round operation cycle. Also, a cost/saving analysis shows that application of internal load reducing technologies in non-air-conditioned facilities affect their thermal environment and has a significant impact on worker's productivity. Consideration of worker's productivity improvement as a component of operating cost reduction has a significant impact on the overall pay-back calculation results.

C1 [Zhivov, Alexander M.] LEA ECBCS Annex 46, Champaign, IL 61824 USA.

[Zhivov, Alexander M.; Liesen, Richard] US Army Engineer Res & Dev Ctr, Construct Engn Res Lab, Energy Branch, Champaign, IL USA.

[Fisher, Dan] Oklahoma State Univ, Mech Engn, Stillwater, OK USA.

[Hand, Jon] Univ Strathclyde, Glasgow, Lanark, Scotland.

[Wilson, Barry] GE Aviat, Cincinnati, OH USA.

RP Zhivov, AM (reprint author), LEA ECBCS Annex 46, Champaign, IL 61824 USA.

CR ACGIH, 2003, THRESH LIM VAL CHEM

Clarke J. A., 2001, ENERGY SIMULATION BU

\*EN INF ADM, WORLD EN OV 1994 200

\*ENERGYPLUS ENG RE, 2006, SIM MOD ENCL REF SOL

HAND JW, 2006, ESP R COOKBOOK

\*IEA, ANN 46 HOL ASS TOOL

ISO, 1989, 7243 ISO, P7243

LAOUADI A, 2003, 8 INT BPSA C EINDH N, P705

Malchaire J B, 1976, Ann Occup Hyg, V19, P251, DOI 10.1093/annhyg/19.3-4.251

STRAND RK, 2000, P ACSA TECHN C CAMBR

SULLIVAN DC, 1976, ASHRAE T 2, V82, P279

\*US DOE, 2003, US DEP EN CLIM ZON M

NR 12

TC 0

Z9 0

U1 0

U2 4

PU AMER SOC HEATING, REFRIGERATING AND AIR-CONDITIONING ENGS

PI ATLANTA

PA 1791 TULLIE CIRCLE NE, ATLANTA, GA 30329 USA

SN 0001-2505

J9 ASHRAE TRAN

PY 2010

VL 116

BP 401

EP +

PN 2

PG 3

WC Thermodynamics

SC Thermodynamics

GA BTY96

UT WOS:000288475800043

DA 2018-05-03



ER

PT B

AU Krarti, M

Hajiah, A

AF Krarti, Moncef

Hajiah, Ali

GP ASME

TI ANALYSIS OF IMPACT OF DAYLIGHT TIME SAVINGS ON ENERGY USE OF BUILDINGS  
IN KUWAITSO ES2009: PROCEEDINGS OF THE ASME 3RD INTERNATIONAL CONFERENCE ON ENERGY  
SUSTAINABILITY, VOL 2

LA English

DT Proceedings Paper

CT 3rd International Conference on Energy Sustainability

CY JUL 19-23, 2009

CL San Francisco, CA

SP ASME, Adv Energy Syst Div, ASME, Solar Energy Div

DE Night ventilation; cooling energy saving; simplified method; theoretical  
model

AB In this paper, a detailed simulation-based analysis is conducted to assess the impact of adopting Daylight-Saving Time (DST) on the electrical energy use and peak demand in Kuwait. The analysis focused on the impact of DST in the building sector since it represents 90% of electrical energy usage of Kuwait.

The simulation results indicate that the adoption of DST has mixed impacts for Kuwait. While the commercial and the governmental sectors may benefit from the DST, the private residences and apartment buildings can see both their annual energy use and peak demand increase slightly by adopting DST. The overall impact of the DST implementation is rather minimal with a slight increase energy use of about 0.07% and a slight reduction in peak demand of 0.14% or about 12 MW based on 2005 electrical peak demand for Kuwait.

C1 [Krarti, Moncef] Univ Colorado, Civil Environm &amp; Architectural Dept, Boulder, CO 80309 USA.

RP Krarti, M (reprint author), Univ Colorado, Civil Environm &amp; Architectural Dept, Boulder, CO 80309 USA.

OI KRARTI, MONCEF/0000-0001-6748-698X; Krarti, Moncef/0000-0002-8758-9123

CR \*DOT, 1975, 2VHN49D3U65 DOT GPO, V2

\*DOT, 1975, 2VHN49D3U65 DOT GPO, V1

FRANKLIN B, 1874, J PARIS 0426

\*MEW, 2004, EN CONS ROGR COD PRA

Rock BA, 1997, ENERB BUILDINGS, V25, P63, DOI 10.1016/S0378-7788(96)00990-5

\*UCEI, 2007, DOES EXT DAYL SAV TI

NR 6

TC 0

Z9 0

U1 0

U2 3

PU AMER SOC MECHANICAL ENGINEERS

PI NEW YORK

PA THREE PARK AVENUE, NEW YORK, NY 10016-5990 USA

BN 978-0-7918-4890-6

PY 2009

BP 393

EP 403

PG 11

WC Engineering, Mechanical

SC Engineering

GA BQV53

UT WOS:000281966900045

DA 2018-05-03

ER

PT B

AU Lee, BH

Baek, JM

Won, JR

Kim, JH

AF Lee, Byung Ha

Baek, Jung Myeong

Won, Jong-Ryul

Kim, Jung Hoon

GP IEEE

TI A Study on Economic Analysis Corresponding to Enhancement of Energy Efficiency for Residential Air Conditioners

SO T& D ASIA: 2009 TRANSMISSION & DISTRIBUTION CONFERENCE & EXPOSITION: ASIA AND PACIFIC

LA English

DT Proceedings Paper

CT Transmission and Distribution Conference and Exposition - Asia and Pacific

CY OCT 26-30, 2009

CL Seoul, SOUTH KOREA

DE Bass diffusion model; residential air conditioner; efficiency standard; avoided cost

ID STANDARDS

AB Reducing energy use is a great target of the energy policies for solving the problems of high oil price and CO<sub>2</sub> emission, and the authorities have applied energy efficiency standards to principal appliances such as air conditioners and refrigerators in order to reduce energy consumption. In this paper the distribution of residential air conditioners is estimated using the Bass diffusion model and then economic analysis corresponding to enhancement of energy efficiency is performed more precisely than existing methods.

C1 [Lee, Byung Ha; Baek, Jung Myeong] Univ Incheon, Dept Elect Engn, Incheon, South Korea.

[Won, Jong-Ryul] Anyang Univ, Dept Elect & Elect Engn, Anyang, South Korea.

[Kim, Jung Hoon] Hongik Univ, Sch Elect & Elect Engn, Seoul, South Korea.

RP Lee, BH (reprint author), Univ Incheon, Dept Elect Engn, Incheon, South Korea.

EM bhlee@incheon.ac.kr; baekguy96@nate.com; jrwon@aycc.anyang.ac.kr; kimjh@hongik.ac.kr

FU KESRI [R-2005-7-150]; MKE(Ministry of Knowledge Economy)

FX This work has been supported by KESRI(R-2005-7-150), Which is funded by MKE(Ministry of Knowledge Economy).

CR Geller H, 2006, ENERG POLICY, V34, P556, DOI 10.1016/j.enpol.2005.11.010

Mahlia TMI, 2004, ENERG POLICY, V32, P1819, DOI [10.1016/S0301-4215(03)00169-1, 10.1016/80301-4215(03)00169-1]

Mahlia TMI, 2002, ENERG CONVERS MANAGE, V43, P743, DOI 10.1016/S0196-8904(01)00073-5

MYOUNG BJ, 2008, KIEE, V57, P1938

Turiel I, 1997, ENERG BUILDINGS, V26, P35, DOI 10.1016/S0378-7788(96)01023-7

Waide P, 1997, ENERG BUILDINGS, V26, P45, DOI 10.1016/S0378-7788(96)01013-4

WON JR, 2006, ICEE 2006 JUL

WON JR, 2008, ICEE 2008 JUL

NR 8

TC 0

Z9 0

U1 0

U2 0

PU IEEE

PI NEW YORK

PA 345 E 47TH ST, NEW YORK, NY 10017 USA

BN 978-1-4244-5229-3

PY 2009

BP 853

EP +

PG 2

WC Energy & Fuels; Engineering, Electrical & Electronic

SC Energy & Fuels; Engineering

GA BPG12

UT WOS:000278799700202

DA 2018-05-03

ER

PT B

AU Li, YM

Pan, YQ

Chen, C

AF Li, Yuming

Pan, Yiqun

Chen, Chen

GP ASME

TI STUDY ON ENERGY SAVING RETROFITTING STRATEGIES FOR EXISTING PUBLIC BUILDINGS IN SHANGHAI

SO ES2009: PROCEEDINGS OF THE ASME 3RD INTERNATIONAL CONFERENCE ON ENERGY SUSTAINABILITY, VOL 2

LA English

DT Proceedings Paper

CT 3rd International Conference on Energy Sustainability

CY JUL 19-23, 2009

CL San Francisco, CA

SP ASME, Adv Energy Syst Div, ASME, Solar Energy Div

ID OFFICE PROJECT; PERFORMANCE

AB Public buildings include office building, schools, hotels, hospitals, retails and others. This paper selects two types of existing public buildings office and hotel to conduct research. It firstly introduces and analyzes the feasible energy saving retrofitting strategies and technologies for existing public buildings in Shanghai, mainly about building envelope, HVAC system and lighting system. Then it builds up prototypical models, with whole building energy analysis software Energy Plus, for office and hotel respectively to simulate and calculate the annual energy saving and payback period of the various strategies. Therefore the different features of the two types of buildings and the energy saving effects of various strategies used on them are studied.

The results show that the energy saved by each one strategy may be different for different types of existing buildings. For office buildings, such ECMs (energy conservation measures) as external shading, energy efficient lighting system, daylighting in perimeter area and variable pumps have short payback period.

While for hotels, external shading, variable pumps and temperature reset have short payback period.

C1 [Li, Yuming; Pan, Yiqun] Tongji Univ, Shanghai 200092, Peoples R China.

RP Li, YM (reprint author), Tongji Univ, Shanghai 200092, Peoples R China.

CR ASHRAE, 2004, 9012004 ASHRAE

Canbay CS, 2004, ENERGBUILDINGS, V36, P587, DOI 10.1016/j.enbuild.2004.01.031

CHEN C, 2006, REFRIGERATION AIR CO, V1

[Anonymous], 2005, 501892005 GB

Gustafsson SI, 2000, ENERGBUILDINGS, V33, P49, DOI 10.1016/S0378-7788(00)00062-1

Hestnes AG, 2002, BUILD ENVIRON, V37, P569, DOI 10.1016/S0360-1323(02)00003-3

HUANG J, GRI902036 LAWR BERK

Papadopoulos AM, 2002, ENERGBUILDINGS, V34, P455, DOI 10.1016/S0378-7788(01)00129-3

Santamouris M, 1996, ENERGBUILDINGS, V24, P65, DOI 10.1016/0378-7788(95)00963-9

Santamouris M, 2002, BUILD ENVIRON, V37, P575, DOI 10.1016/S0360-1323(02)00004-5

Tommerup H, 2006, ENERGBUILDINGS, V38, P618, DOI 10.1016/j.enbuild.2005.08.017

\*U IL LAWR BERK NA, 2002, ENERGYPLUS2 1 MAN

Verbeeck G, 2005, ENERGBUILDINGS, V37, P747, DOI 10.1016/j.enbuild.2004.10.003

WU Z, 2008, JHVAC, V3

XU C, 2006, CONSTRUCTION CONSERV, V5

ZHEN X, 2006, SHANGHAI ENERGY CONS, V6

ZHOU H, 2007, JHVAC, V9

NR 17  
 TC 0  
 Z9 0  
 U1 0  
 U2 3  
 PU AMER SOC MECHANICAL ENGINEERS  
 PI NEW YORK  
 PA THREE PARK AVENUE, NEW YORK, NY 10016-5990 USA  
 BN 978-0-7918-4890-6  
 PY 2009  
 BP 301  
 EP 307  
 PG 7  
 WC Engineering, Mechanical  
 SC Engineering  
 GA BQV53  
 UT WOS:000281966900035  
 DA 2018-05-03  
 ER

PT B  
 AU Ota, N  
   Arens, E  
   Wright, P  
 AF Ota, Nathan  
   Arens, Ed  
   Wright, Paul

GP ASME  
 TI ENERGY EFFICIENT RESIDENTIAL THERMAL CONTROL WITH WIRELESS SENSOR  
 NETWORKS: A CASE STUDY FOR AIR CONDITIONING IN CALIFORNIA  
 SO IMECE 2008: PROCEEDINGS OF THE ASME INTERNATIONAL MECHANICAL ENGINEERING  
 CONGRESS AND EXPOSITION - 2008, VOL 8

LA English  
 DT Proceedings Paper  
 CT ASME International Mechanical Engineering Congress and Exposition  
 CY OCT 31-NOV 06, 2008  
 CL Boston, MA  
 SP Amer Soc Mech Engineers

AB Residential thermostats are sensor-limited devices, but low-cost wireless sensor network technology is enabling new spatially distributed sensing capabilities. This paper evaluates the energy and comfort performance of three multi-sensor control strategies that use wireless temperature and humidity sensors in each room and that can be applied to existing on-off residential central systems. The multi-sensor control strategies adjust the temperature set point of a thermostat to control the average of all room temperatures using a temperature threshold logic, minimize aggregate discomfort of all rooms, or maximize the number of rooms within a comfort zone. The strategies were tested using a custom wireless sensor network control system in a seven room, 2,100 square foot single-story house located in Pleasanton, CA during August and September. Performance was benchmarked against an implementation of a single-sensor constant temperature set point control logic using the custom control system and against a constant temperature set point using the original thermostat. Results show multi-sensor strategies may produce simultaneous improvements in energy consumption, room-to-room temperature distributions, and average comfort, compared to the single-sensor constant temperature set point threshold logic.

C1 [Ota, Nathan; Wright, Paul] Univ Calif Berkeley, Dept Mech Engr, Berkeley, CA 94720 USA.

RP Ota, N (reprint author), Univ Calif Berkeley, Dept Mech Engr, Berkeley, CA 94720 USA.

CR ASHRAE, 1997, ASHRAE HDB FUND

- \*ASHRAE, 1992, 55 ANSI ASHRAE
- BOUCHELLE MD, 2000, ACEEE SUMMER STUDY E
- Brager GS, 2000, ASHRAE J, V42, P21
- \*CEC, 2004, CAL STAT RES APPL SA

\*EERE, 2006, EN BUILD DAT BOOK  
 Fanger P. O., 1972, THERMAL COMFORT ANAL  
 Haiad Carlos, 2004, PROGRAMMABLE THERMOS  
 Hill J, 2000, ACM SIGPLAN NOTICES, V35, P93, DOI 10.1145/356989.356998  
 Lin C., 2002, INT C ENH BUILD OP  
 Martin R. A., 2002, ASHRAE T, V108, P407  
 MOZER M, 1995, CURRENT TRENDS CONNE  
 Mozer MC, 1997, ADV NEUR IN, V9, P953  
 Nevius M., 2000, ACEEE SUMMER STUDY E, V8  
 \*NOAA, 2006, NAT DIG FOR DAT XML  
 Polastre J., 2005, P 4 INT S INF PROC S, P48  
 SPORTON TM, 1972, J PHYS E, P317  
 van Breemen AJN, 2001, CONTROL ENG PRACT, V9, P233, DOI 10.1016/S0967-0661(00)00111-8  
 WANG D, 2002, INT C ENH BUILD OP R  
 WEN J, 2001, P 1 ISA IEEE C

NR 20

TC 0

Z9 0

U1 0

U2 2

PU AMER SOC MECHANICAL ENGINEERS

PI NEW YORK

PA THREE PARK AVENUE, NEW YORK, NY 10016-5990 USA

BN 978-0-7918-4869-2

PY 2009

BP 43

EP 52

PG 10

WC Thermodynamics; Energy & Fuels; Engineering, Mechanical

SC Thermodynamics; Energy & Fuels; Engineering

GA BJG88

UT WOS:000265684200005

DA 2018-05-03

ER

PT S

AU Pan, YQ

Huang, ZZ

Zheng, XW

AF Pan, Yiqun

Huang, Zhizhong

Zheng, Xiaowei

GP ASHRAE

TI Data Processing and Data Mining on Energy Consumption Database of  
 Commercial Buildings in Shanghai

SO ASHRAE TRANSACTIONS 2009, VOL 115, PT 1

SE ASHRAE Transactions

LA English

DT Proceedings Paper

CT Winter Meeting of the

American-Society-of-Heating-Refrigerating-and-Air-Conditioning-Engineers

CY JAN 25-28, 2009

CL Chicago, IL

SP Amer Soc Heating, Refrigerating & Air Conditioning Engineers

ID REGRESSION; PERFORMANCE

AB This paper adopts data processing methods and data mining technology to develop a building energy consumption model, based on an energy consumption database of commercial buildings that includes 95 commercial buildings in Shanghai. Data transformation and data reduction are conducted to clear up data

relations in the database. Three methods for missing data handling as well as outlier inspection are used for data processing. The software SAS is used as the tool for data processing and data mining. An optimum regression model of building energy consumption is made for each missing data element. Through comparing the three optimum regression models and their prediction results of building energy consumption, it is found that the Regression Imputation Method was the best method to handle missing data, and a regression model with operation time of HVAC system, cooling capacity, ratio of office area to total gross area, and hotel area to total gross area was the most reasonable prediction model of the energy consumption of commercial buildings in Shanghai.

C1 [Pan, Yiqun; Huang, Zhizhong; Zheng, Xiaowei] Tongji Univ, Sino German Coll Appl Sci, Inst Bldg Performance & Technol, Shanghai 200092, Peoples R China.

RP Pan, YQ (reprint author), Tongji Univ, Sino German Coll Appl Sci, Inst Bldg Performance & Technol, Shanghai 200092, Peoples R China.

CR ABDULLATIF E, 2004, ENERGY CONVERSION MA, V45, P2127

Chung W, 2006, APPL ENERG, V83, P1, DOI 10.1016/j.apenergy.2004.11.003

Freire RZ, 2008, ENERG BUILDINGS, V40, P810, DOI 10.1016/j.enbuild.2007.05.014

Ghiaus C, 2006, ENERG BUILDINGS, V38, P582, DOI 10.1016/j.enbuild.2005.08.014

GRZYMALABUSSE JW, 2000, COMP SEVERAL APPROAC, P340

Lam JC, 1997, ENERG BUILDINGS, V26, P189, DOI 10.1016/S0378-7788(96)01034-1

LANG SW, 2005, CONSTRUCTION SCI TEC

\*LAWR BERK NAT LAB, 1991, DOE 2 BAS

Pedersen L, 2007, RENEW SUST ENERG REV, V11, P998, DOI 10.1016/j.rser.2005.08.005

TU FX, 2004, ENERGY ENV PROTECTIO

NR 10

TC 0

Z9 0

U1 0

U2 2

PU AMER SOC HEATING, REFRIGERATING AND AIR-CONDITIONING ENGS

PI ATLANTA

PA 1791 TULLIE CIRCLE NE, ATLANTA, GA 30329 USA

SN 0001-2505

J9 ASHRAE TRAN

PY 2009

VL 115

BP 382

EP +

PN 1

PG 2

WC Thermodynamics; Construction & Building Technology

SC Thermodynamics; Construction & Building Technology

GA BMG17

UT WOS:000272254800039

DA 2018-05-03

ER

PT B

AU Reichard, G

Bhattacharjee, S

AF Reichard, Georg

Bhattacharjee, Suchismita

GP ASME

TI A COMPARISON OF FOCUS AND EFFECTIVENESS OF EUROPEAN VERSUS US ENERGY EFFICIENCY PROGRAMS FOR BUILDINGS

SO ES2009: PROCEEDINGS OF THE ASME 3RD INTERNATIONAL CONFERENCE ON ENERGY SUSTAINABILITY, VOL 1

LA English

DT Proceedings Paper

CT 3rd International Conference on Energy Sustainability

CY JUL 19-23, 2009

CL San Francisco, CA

SP ASME, Adv Energy Syst Div, ASME, Solar Energy Div

ID BARRIERS; SAVINGS

AB The authors present a comparative study on effectiveness of energy policies for the building sector that are presently implemented in selected countries in Europe versus selected states in the U.S. Socio-economic factors affecting energy consumption on both sides of the Atlantic are identified from a human behavior perspective. Various identified factors known to affect energy efficiency and consumption have been positioned in diagrams based on four primary directions: lifestyle, economy, environment, and technology. In a second step various programs and incentives are positioned in the same diagram to demonstrate how well these strategies address the factors identified before. This is done for selected countries and continents in sub-diagrams to allow a comparison of effectiveness and provide a tool for predicting the effectiveness of a possible policy or program transfer to other nations. The research conducted so far suggests that energy efficiency policies and measures implemented in the United States do not always target the factors that have been identified to most significantly influence energy consumption. The results indicate that there might be a significant gap between parameters that are guiding factors affecting energy consumption, and parameters targeting a proper implementation of energy efficient policies. The authors strive to provide a tool that will help policy makers and other decision makers to evaluate and compare their incentives and programs against those from other countries and benefit from lessons learned by mapping various policies towards specific efficiency parameters.

C1 [Reichard, Georg; Bhattacharjee, Suchismita] Virginia Tech, Myers Lawson Sch Construct, Blacksburg, VA 24061 USA.

RP Reichard, G (reprint author), Virginia Tech, Myers Lawson Sch Construct, Blacksburg, VA 24061 USA.

OI Reichard, Georg/0000-0003-4041-9968

CR BHATTACHARJEE S, 2009, P INT EN PROGR EV C

\*BMVIT, 1999, BUILD TOM

Boonekamp PGM, 2006, ENERG POLICY, V34, P3977, DOI 10.1016/j.enpol.2005.09.020

Brown MA, 2001, ENERG POLICY, V29, P1197, DOI 10.1016/S0301-4215(01)00067-2

DeCanio SJ, 1998, ENERG POLICY, V26, P441, DOI 10.1016/S0301-4215(97)00152-3

\*DOE, 2004, BUILD AM PROGR

FEIST W, 1988, PASSIVHAUS STANDARD

GOLOVE W, 1996, MARK BARR EN EFF CRI

HAMMURABI, 2000, OLDEST CODE LAWS WOR, P2285

Laustsen J., 2008, EN EFF REQ BUILD COD

Mills E, 2006, ENERG POLICY, V34, P188, DOI 10.1016/j.enpol.2004.08.042

Oikonomou V, 2007, ENERG POLICY, V35, P1147, DOI 10.1016/j.enpol.2006.02.017

NR 12

TC 0

Z9 0

U1 1

U2 2

PU AMER SOC MECHANICAL ENGINEERS

PI NEW YORK

PA THREE PARK AVENUE, NEW YORK, NY 10016-5990 USA

BN 978-0-7918-4889-0

PY 2009

BP 75

EP 84

PG 10

WC Engineering, Mechanical

SC Engineering

GA BQV06

UT WOS:000281910700009

DA 2018-05-03

ER

PT B

AU Sun, FM

Dang, KC

Wang, Z

Liu, ZM

AF Sun Fengming

Dang Kaichun

Wang Zhen

Liu Zhuanmei

BE Zhang, H

Zhang, H

TI Research of Large Public Building Energy Consumption On-Line Monitoring System

SO DYNAMICS OF URBAN AGGLOMERATION IN CHINA: PREFERENCES OF ENERGY-SAVING AND ENVIRONMENT-FRIENDLY SOCIETY

LA English

DT Proceedings Paper

CT International Symposium on Sustainable-Development-of-City-Group

CY NOV 16, 2009

CL Changsha, PEOPLES R CHINA

SP Sustainable Dev City Grp, Cent S Univ, Hunan Inst Syst Engr & Management

DE building energy efficiency; large public building; energy efficiency management; on-line monitoring

AB The large public building consumes huge amounts of electricity, heat, gas and other resources.

Completely gathered statistics of energy consumption status of large public buildings in China is the foundation to implement public building energy conservation management. Through methods of research and develop large public building energy consumption on-line monitoring system and conduct real-time statistic on public building energy use efficiency and consumption level, is enabled to report energy consumption statue every hour and day, and supply necessary data basis for energy conservation managers. This paper has brought out the online monitoring system of the energy consumption of the public buildings, based on the mature auto technology and information technology, according to the principles of accuracy, real-time and continuous.

The online monitoring system includes the energy subitem metering and collection system, energy consumption data remote transmission systems, energy data management center. Energy subitem metering and collection is the focus of on-line monitoring system, through the current situation analysis of electricity supply, gas supply and heat supply system in public buildings to create energy consumption model. It aims to probe the installation requirements of the metering equipments, and to implement subitem and real-time collection function of building energy consumption; In aspect of energy consumption data remote transmission systems, transmit energy consumption data to energy conservation management center through Internet; Energy data anagement center mainly gathers up and analyzes real-time data sent back by every subitem metering device, to provide feedback information to building energy conservation management department and project owner. Therefore, relevant management measures can be taken to reduce energy consumption total volume of large public building.

Take one large public building of Tangshan city as example, realty administrative bureau and conducted systematic analysis and studies on the approach and method to create large public building energy consumption on-line monitoring system, and also made relevant statements on energy subitem metering and collection system, energy data management center and other relevant points of focus.

Promotion of the large public building energy consumption on-line monitoring system, creation of the rapid, efficient and comprehensive energy consumption and collection channels will meet the demands of building data collection and application from building energy conservation management department and users. This will make public building operation system develop to the direction of efficient and saving energy usage, and reach the goal of saving building operation energy consumption.

C1 [Sun Fengming; Dang Kaichun; Wang Zhen] HeBei Univ Engr, Dept Architecture, Handan, Peoples R China.

[Liu Zhuanmei] Tangshan Construct Grp, Tangshan, Peoples R China.

RP Sun, FM (reprint author), HeBei Univ Engr, Dept Architecture, Handan, Peoples R China.

EM zsunfm@163.com

CR FENG YP, 2007, HV AC, V37, P8

Jarnagin R, 2000, ASHRAE J, V42, P31

MAO Y, 1999, ASHRAE T, V105, P231



Paay J, 2008, COMPUT SUPP COOP W J, V17, P275, DOI 10.1007/s10606-007-9072-1  
 YING JY, 2006, INTELLIGENT BUILDING, P38

NR 5

TC 0

Z9 0

U1 0

U2 4

PU AUSSINO ACAD PUBL HOUSE

PI MARRICKVILLE

PA PO BOX 893, MARRICKVILLE, NSW 2204 00000, AUSTRALIA

BN 978-1-921712-03-6

PY 2009

BP 280

EP +

PG 2

WC Engineering, Environmental; Environmental Sciences

SC Engineering; Environmental Sciences & Ecology

GA BQC51

UT WOS:000280689300053

DA 2018-05-03

ER

PT S

AU Krstic, H

Culo, K

AF Krstic, H.

Culo, K.

BE Broadbent, G

Brebbia, CA

TI Cost benefit analysis of energy efficient family houses

SO ECO-ARCHITECTURE II: HARMONISATION BETWEEN ARCHITECTURE AND NATURE

SE WIT TRANSACTIONS ON ECOLOGY AND THE ENVIRONMENT

LA English

DT Proceedings Paper

CT 2nd International Conference on Harmonisation between Architecture and  
 Nature

CY 2008

CL Algarve, PORTUGAL

DE energy efficiency; family housing; cost-benefit analysis

AB Buildings have a significant environmental impact. It is estimated that buildings are responsible for 40 per cent of the total energy consumption in the European Union. In this respect it should be taken into account that the major demand for housing and primary market area for eco-efficient construction is single-family housing. A practical goal of a low energy building is to try to achieve the highest energy efficiency with the lowest possible need for energy within the economic limits of reason. In the last 15-20 years, a number of projects have been carried out aiming. at energy-efficient and environmentally friendly housing. Also, technological possibilities to reduce a building's energy consumption have been available for a long time. However, despite the existing vast amount of information, no clear market change has happened. Therefore, special measures are needed to promote commercialization. They should target both, the demand and supply sides. On the demand side there is a need for pilot projects and case studies that should demonstrate that the higher initial construction costs of an energy efficient house can be offset in a short period of time by energy consumption savings. To these end, cost-benefit analyses are needed, that would take into account, beside the direct financial results, also the impact on the environment. This article considers a range of variables that should be included in such analyses. The article is part of a scientific project titled Evaluation of the correlation between investment projects and the environment financed by the Ministry of Science, Education and Sport of the Republic of Croatia.

C1 [Krstic, H.; Culo, K.] Univ Osijek, Fac Civil Engr, Organizat Technol & Management Dept, Osijek, Croatia.

CR \*CROAT EN SOC, 2005, 14 FOR EN DAY CROAT, P117

\*CROAT EN SOC, 2006, 15 FOR EN DAY CROAT, P153

Halme M., 2005, BUSINESS SUSTAINABIL  
Pearce D. W., 1993, WORLD END EC ENV SUS  
\*UNDP PROJ UR, PROJ POT EN UC HRV  
\*WORLD BANK, 1996, HDB EC AN INV OP  
WEB PORTAL NET  
AM BUILDING PERFORMA  
WEB PORTAL GRADIMO  
WEB PORTAL KORAK  
NR 10  
TC 0  
Z9 0  
U1 0  
U2 1  
PU WIT PRESS  
PI SOUTHAMPTON  
PA ASHURST LODGE, SOUTHAMPTON SO40 7AA, ASHURST, ENGLAND  
SN 1746-448X  
BN 978-1-84564-119-1  
J9 WIT TRANS ECOL ENVIR  
PY 2008  
VL 113  
BP 191  
EP 199  
PG 9  
WC Architecture; Construction & Building Technology; Ecology; Environmental  
Sciences; Environmental Studies  
SC Architecture; Construction & Building Technology; Environmental Sciences  
& Ecology  
GA BIA50  
UT WOS:000257927900019  
DA 2018-05-03  
ER  
  
PT B  
AU Marino, C  
Nucara, A  
Piccolo, A  
Pietrafesa, M  
Pudano, A  
AF Marino, Concettina  
Nucara, Antonino  
Piccolo, Antonio  
Pietrafesa, Matilde  
Pudano, Alfredo  
BE Liu, JJ  
Zhang, TF  
Zhai, ZQ  
TI Energy saving and indoor comfort features in residential buildings using  
electro-chromic windows  
SO FIRST INTERNATIONAL CONFERENCE ON BUILDING ENERGY AND ENVIRONMENT,  
PROCEEDINGS VOLS 1-3  
LA English  
DT Proceedings Paper  
CT 1st International Conference on Building Energy and Environment (COBEE  
2008)  
CY JUL 13-16, 2008  
CL Dalian, PEOPLES R CHINA  
SP Tianjin Univ, Dalian Univ Technol, Purdue Univ, Univ Colorado Boulder

DE energy saving; visual comfort; electro-chromic windows  
ID PERFORMANCE

AB The need to optimize the energetic performances of buildings without compromising indoor comfort conditions has induced in the past few years a technological improvement of material typologies used in the building industry. Particular attention, indeed, was dedicated by researchers to transparent materials with the aim of improving the energetic and optical performances of windows through an optimal utilization of solar radiation. In this context, the present work analyzes the behaviour of electro-chromic windows with respect to their visual and energetic performances shown in two typical Italian climates. For two Italian cities the influence of the glasses on energy savings and indoor visual conditions has been investigated and compared with the performances of a simple double panel windows. In addition, an analysis of the influence of window surface on energetic and visual features has been carried out.

C1 [Marino, Concettina; Nucara, Antonino; Pietrafesa, Matilde; Pudano, Alfredo] Mediterranea Univ Reggio Calabria, Dept Informat Math Elect & Transportat Syst, Reggio Di Calabria, Italy.

RP Marino, C (reprint author), Mediterranea Univ Reggio Calabria, Dept Informat Math Elect & Transportat Syst, Reggio Di Calabria, Italy.

EM concettina.marino@unirc.it

CR Aleo F, 2001, ELECTROCHIM ACTA, V46, P2243, DOI 10.1016/S0013-4686(01)00367-X  
\*CEN, 2005, 15315 CEN

Crawley DB, 2001, ENER BUILDINGS, V33, P319, DOI 10.1016/S0378-7788(00)00114-6

Gugliermetti F, 2003, BUILD ENVIRON, V38, P479, DOI 10.1016/S0360-1323(02)00124-5

Koppen W., 1936, HDB KLIMATOLOGIE, V1, P1

Lee ES, 2007, BUILD ENVIRON, V42, P2439, DOI 10.1016/j.buildenv.2006.04.016

Lee ES, 2006, ENER BUILDINGS, V38, P30, DOI 10.1016/j.enbuild.2005.02.009

Pennisi A, 1999, ELECTROCHIM ACTA, V44, P3237, DOI 10.1016/S0013-4686(99)00042-0

Yik F, 2006, ENER BUILDINGS, V38, P463, DOI 10.1016/j.enbuild.2005.08.006

NR 9

TC 0

Z9 0

U1 0

U2 1

PU DALIAN UNIV TECHNOL PRESS

PI DALIAN

PA 2 LINGGONG RD, DALIAN 116024, PEOPLES R CHINA

BN 978-0-9816881-6-9

PY 2008

BP 1692

EP 1700

PG 9

WC Energy & Fuels; Engineering, Environmental; Engineering, Civil

SC Energy & Fuels; Engineering

GA BIH81

UT WOS:000259578900223

DA 2018-05-03

ER

PT B

AU Oh, HW

Han, IT

Park, KR

AF Oh, Hyun Woo

Han, In Tark

Park, Kwang Roh

GP IEEE

TI A power saving system based on Energy-aware Control Elements in  
ubiquitous home network

SO 2008 IEEE INTERNATIONAL SYMPOSIUM ON CONSUMER ELECTRONICS, VOLS 1 AND 2

SE IEEE International Symposium on Consumer Electronics

LA English

DT Proceedings Paper  
 CT IEEE International Symposium on Consumer Electronics  
 CY APR 14-16, 2008  
 CL Vilamoura, PORTUGAL  
 SP IEEE

DE ECE; Energy-aware; power consumption

AB In this paper, we propose the system reducing the power consumption based on the Energy-aware Control Elements (ECE). ECE refers to the minimum unit Module providing a service within the single system. For example, the home gateway system provides the visitor identification service. If it is the case, the main processor, the Ethernet module, the MPEG encoding module built-in camera, and etc. are needed. We classify the main ECE, the Ethernet ECE, the mpeg encoder ECE, and etc.

The home gateway system provides the service like not only the visitor identification service but also internet service, VoIP service, IPTV service and the home automation service. This kind of services can be independently carried out and be performed together with other devices. The home gateway system can save the power consumption by activating only ECE which it is necessary according to the performed service. Also, we suggest the method for saving the power consumption by controlling only ECE required based on the communication traffic. We implement the technology monitoring the communication traffic in the home gateway system through FPGA. This FPGA monitors the communication traffic and distinguishes between the user valid packet and invalid packet. The software embedded in FPGA notifies so that the high layer application can control required ECE according to the user valid packet. We show the marvelous effect for power saving through the ECE base power saving system implementation.

EM hyunwoo@etri.re.kr; ithan@etri.re.kr; krpark@etri.re.kr

CR \*CEA, 2004, CEA WHIT PAP POW MAN

\*COMP COMP CORP PH, 2002, ADV CONF POW INT SPE

\*IEEE, 2005, 1621 IEEE

Pillai P., 2001, P 18 ACM S OP SYST P, P89, DOI DOI 10.1145/502034.502044

\*UPNP, 2002, UPNP POW DEV FRAM 0

\*UPNP, 2007, UPNP LOW POE ARCH UP

NR 6

TC 0

Z9 0

U1 0

U2 0

PU IEEE

PI NEW YORK

PA 345 E 47TH ST, NEW YORK, NY 10017 USA

BN 978-1-4244-2422-1

J9 I SYMP CONSUM ELECTR

PY 2008

BP 493

EP 496

PG 4

WC Engineering, Electrical & Electronic

SC Engineering

GA BID21

UT WOS:000258521400130

DA 2018-05-03

ER

PT S

AU Tsuji, H

Kojoma, M

Takahashi, A

Nakano, M

Aoki, S

Inoue, S

Asari, K

Mimura, E

AF Tsuji, Hiroshi

Kojoma, Masatomo

Takahashi, Atsushi

Nakano, Masayuki

Aoki, Shingo

Inoue, Shuuki

Asari, Kazunari

Mimura, Eiji

GP IEEE

TI Preference Mining for Future Home Energy Consumption

SO 2008 IEEE INTERNATIONAL CONFERENCE ON SYSTEMS, MAN AND CYBERNETICS  
(SMC), VOLS 1-6

SE IEEE International Conference on Systems Man and Cybernetics Conference  
Proceedings

LA English

DT Proceedings Paper

CT IEEE International Conference on System, Man, and Cybernetic

CY OCT 12-15, 2008

CL Singapore, SINGAPORE

SP IEEE

DE Knowledge Mining; Marketing Analysis; Home Energy Consumption; Value  
Analysis

AB To assess the demand "what kinds of home equipment will be unveiled in the future?", this paper presents an experimental analysis for consumers preference. The experimentation consists of four steps: (1) based on the seeds map of technology for energy consumption, six services and their related products for future home are drawn, (2) For the services, questionnaire which collects consumers' preference is designed, (3) to clarify the causal relation among the preference, personal demography and value sense, three kinds of methods (VS-map, VAUD-table, Stepwise Bayesian Network) are proposed, (4) The methods are applied to the collected 1,030 responses to the questionnaire. For example, the experimentation has found the preference such that the unmarried persons make points of convenience in daily life rather than other classes of persons.

C1 [Tsuji, Hiroshi; Kojoma, Masatomo; Takahashi, Atsushi; Nakano, Masayuki; Aoki, Shingo] Osaka  
Prefecture Univ, Grad Sch Engn, Sakai, Osaka 591, Japan.

[Inoue, Shuuki; Asari, Kazunari; Mimura, Eiji] Kansai Elect Power Co Inc, Energy Use R&D Ctr,  
Amagasaki, Hyogo, Japan.

RP Tsuji, H (reprint author), Osaka Prefecture Univ, Grad Sch Engn, Sakai, Osaka 591, Japan.

EM tsuji@cs.osakafu-u.ac.jp; inoue.shuuki@d4.kepco.co.jp

CR Andrews RL, 2002, J MARKETING RES, V39, P87, DOI 10.1509/jmkr.39.1.87.18936

AOKI S, 2007, IEEE INT C SYST MAN, P1919

Buzan T., 1996, MIND MAP BOOK

Koretsune A, 2006, IEEE SYS MAN CYBERN, P1382, DOI 10.1109/ICSMC.2006.384909

LII SR, 1988, SMARTHOUSE COMING RE

Neapolitan R. E., 2003, LEARNING BAYESIAN NE

Nielsen J., 1993, USABILITY ENG

Rowe G, 1999, INT J FORECASTING, V15, P353, DOI 10.1016/S0169-2070(99)00018-7

TAKAHASHI A, 2008, LECT NOTES IN PRESS

TOYOTA H, 2004, COVARIANCE STRUCTURE

NR 10

TC 0

Z9 0

U1 0

U2 1

PU IEEE

PI NEW YORK

PA 345 E 47TH ST, NEW YORK, NY 10017 USA

SN 1062-922X

BN 978-1-4244-2383-5

J9 IEEE SYS MAN CYBERN

PY 2008

BP 3696

EP +

PG 2

WC Computer Science, Artificial Intelligence; Computer Science,  
Cybernetics; Engineering, Electrical & Electronic; Imaging Science &  
Photographic Technology

SC Computer Science; Engineering; Imaging Science & Photographic Technology

GA BKT54

UT WOS:000269197301313

DA 2018-05-03

ER

PT B

AU Zhou, L

Morofsky, E

Haghighat, F

AF Zhou, Liang

Morofsky, Edward

Haghighat, Fariborz

BE Liu, JJ

Zhang, TF

Zhai, ZQ

TI Applying simulation-based optimization to improve energy efficiency in  
two generic office buildings

SO FIRST INTERNATIONAL CONFERENCE ON BUILDING ENERGY AND ENVIRONMENT,  
PROCEEDINGS VOLS 1-3

LA English

DT Proceedings Paper

CT 1st International Conference on Building Energy and Environment (COBEE  
2008)

CY JUL 13-16, 2008

CL Dalian, PEOPLES R CHINA

SP Tianjin Univ, Dalian Univ Technol, Purdue Univ, Univ Colorado Boulder

DE survey; energy effective measures; energy simulation; Artificial Neural  
Network; genetic algorithm

AB This study was geared at optimizing the applications of low energy technologies in office buildings.

Energy and resource saving measures were extracted from existing high performance buildings practices through a subjective survey among building professionals, which provided guidelines for further optimization work on adapting building parameters and components. The two reference buildings were conceived to meet the requirements of the Canadian Model National Energy Code for Buildings. The path taken for optimization divided the problem into three phases. First, TRNSYS models were developed to predict the energy performance of the two buildings, and the simulation outputs were compared to the results in literature for accuracy confirmation. Then, building characteristics and components were varied in the TRNSYS models to build a database, for training and testing Artificial Neural Network (ANN) models for Response Surface Approximations (RSA). Finally, the ANN model was invoked inside Genetic Algorithm loops, in an attempt to search for the best combination of building parameters that could reduce the energy consumption of the target buildings to the most. The final optimization results demonstrated that up to 39% energy saving could be achieved in both buildings by upgrading the building envelop, enhancing the ventilation regulation, reducing lighting power density, and improving the efficiency of electrical appliance and HVAC systems.

C1 [Zhou, Liang; Haghighat, Fariborz] Concordia Univ, Dept Bldg Civil & Environm Engn, Montreal, PQ, Canada.

RP Zhou, L (reprint author), Concordia Univ, Dept Bldg Civil & Environm Engn, Montreal, PQ, Canada.

EM grace\_zhouliang@yahoo.com

CR MOROFSKY E, 2003, P 9 INT C THERM STOR

\*NAT RES CAN, 2005, EN US DAT HDB TABL C

\*NAT RES COUNC CAN, 1997, CAN MOD NAT EN COD B

NR 3

TC 0

Z9 0

U1 0

U2 4

PU DALIAN UNIV TECHNOL PRESS

PI DALIAN

PA 2 LINGGONG RD, DALIAN 116024, PEOPLES R CHINA

BN 978-0-9816881-6-9

PY 2008

BP 371

EP 378

PG 8

WC Energy &amp; Fuels; Engineering, Environmental; Engineering, Civil

SC Energy &amp; Fuels; Engineering

GA BIH81

UT WOS:000259578900046

DA 2018-05-03

ER

PT B

AU Chowdhury, AA

Rasul, MG

Khan, MMK

AF Chowdhury, Ashfaque Ahmed

Rasul, M. G.

Khan, M. M. K.

BE Jiang, Y

Zhu, YX

Yang, XD

Li, XT

TI Modelling and simulation of building energy consumption: A case study on  
an institutional building in Central Queensland, Australia

SO BUILDING SIMULATION 2007, VOLS 1-3, PROCEEDINGS

LA English

DT Proceedings Paper

CT 10th Conference of the

International-Building-Performance-Simulation-Association

CY SEP 03-06, 2007

CL Tsinghua Univ, Beijing, PEOPLES R CHINA

SP China HVAC&R Soc, Amer Soc Heating, Refrigerat & Air Condit Engineers, Energy Conservat Buildings  
& Community Syst, Federat European Heating & Air Conditioning Assoc, US DOE, Int Bldg Performance  
Simulat Assoc

HO Tsinghua Univ

DE building energy; modelling and simulation; institutional building;

DesignBuilder; EnergyPlus

AB Modelling and simulation of energy consumption in Information Technology (IT) building on the  
Rockhampton campus of Central Queensland University, Australia is presented. Design Builder,  
commercially available software, was used for the prediction of energy consumption. All the possible  
sources and uses of energy in building were accounted in the modelling and simulation. The operation of  
the Heating, Ventilation and Air Conditioning (HVAC) system and the lighting energy consumption of the  
whole building has been studied in detailed. The factors that affect building energy performance and  
thermal comforts of the occupants during summer and winter have been identified. Further studies are  
being carried out to evaluate whole building annual thermal performance and retrofit decision making.C1 [Chowdhury, Ashfaque Ahmed; Rasul, M. G.; Khan, M. M. K.] Univ Cent Queensland, Fac Sci Engn &  
Hlth, Coll Engn & Built Environm, Rockhampton, Qld 4701, Australia.RP Chowdhury, AA (reprint author), Univ Cent Queensland, Fac Sci Engn & Hlth, Coll Engn & Built  
Environm, Rockhampton, Qld 4701, Australia.

CR Building Systems Laboratory, 1999, BLAST 3 0 US MAN  
 CHOWDHURY AA, 2006, P SIMBUILD 2006 MIT  
 Crawley D. B., 2001, ENERGY BUILDINGS, V33  
 \*DESIGNBUILDER SOF, 2006, DESIGNBUILDER US MAN  
 DRKAL F, 1997, BUILDING SIMULATION  
 Fanger P., 1970, THERMAL COMFORT  
 Krarti M., 2000, ENERGY AUDIT BUILDIN  
 WINKELMANN FC, 1993, DOE2 SUPPLEMENT VERS  
 Zhu Y., 2005, ENERGBUILDINGS, V38, P421  
 2006, ENERGYPLUS MANUAL DO  
 NR 10  
 TC 0  
 Z9 0  
 U1 0  
 U2 1  
 PU TSINGHUA UNIVERSITY PRESS  
 PI BEIJING  
 PA TSINGHUA UNIVERSITY HAIDIANQU, BEIJING 100084, PEOPLES R CHINA  
 BN 978-0-9771706-3-0  
 PY 2007  
 BP 1916  
 EP 1923  
 PG 8  
 WC Construction & Building Technology; Engineering, Civil; Mathematics,  
 Applied  
 SC Construction & Building Technology; Engineering; Mathematics  
 GA BHI13  
 UT WOS:000253394500278  
 DA 2018-05-03  
 ER  
  
 PT B  
 AU Li, Q  
 Liu, CB  
 AF Li Qian  
 Liu Chang bin  
 BE Zhang, H  
 Chen, L  
 TI Evaluation of applicable energy-saving technology for buildings  
 SO PROCEEDINGS OF THE 2007 INTERNATIONAL CONFERENCE ON MANAGEMENT SCIENCE  
 AND ENGINEERING - MANAGEMENT AND ORGANIZATION STUDIES SECTION  
 LA English  
 DT Proceedings Paper  
 CT Henan-Polytechnic-University International Conference on Management  
 Science and Engineering  
 CY AUG 20, 2007  
 CL Jiaozhu, PEOPLES R CHINA  
 SP Orient Acad Forum, Blue Mt Grp Pty Ltd, Beijing Zhongjing Shiji Investment Co Ltd, Henan Polytech  
 Univ  
 DE applicable energy-saving technology for buildings; evaluation of  
 technology; life cycle assessment; comprehensive evaluation; sustainable  
 development  
 AB Energy saving of buildings is an important part of energy saving strategic planning for our country, and  
 choosing the energy-saving technology scientifically is one of the core works in such process. Reasonable  
 energy-saving technology for buildings will bring great influence in the aspect of effect and profit, and it is  
 also the foundation of establishing feasible economic prompting policy. This paper will analyze the  
 choosing principle of applicable energy-saving technology for buildings, put for-ward the evaluation mode



with the guidance of sustainable development theory and environment economics theory, and give some advice to the work of energy saving of buildings.

C1 [Li Qian; Liu Chang bin] Beijing Jiaotong Univ, Sch Economy & Management, Beijing 100044, Peoples R China.

CR GRAEDEL TE, 2004, IND ECOLOGY, P205

HUANG ZL, 2005, CONSTRUCTION SCI TEC, V13, P48

LIU GP, 2006, ARCHITECTURE TECHNOL, V10, P746

TANG Y, 2003, THESIS TIANJIN U, P23

NR 4

TC 0

Z9 0

U1 0

U2 0

PU ORIENT ACAD FORUM

PI MARRICKVILLE

PA PO BOX 893, MARRICKVILLE, NSW 2204, AUSTRALIA

BN 978-0-646-47827-2

PY 2007

BP 1246

EP 1250

PG 5

WC Economics; Management

SC Business & Economics

GA BHB14

UT WOS:000252035500224

DA 2018-05-03

ER

PT S

AU Sun, JY

Liu, CB

Xi, B

Xiao, G

AF Sun, Jinying

Liu, Changbin

Xi, Bao

Xiao, Gang

GP IEEE

TI Research on financing environment for building energy efficient service market in China based on dynamic actor network analysis

SO 2007 INTERNATIONAL CONFERENCE ON SERVICE SYSTEMS AND SERVICE MANAGEMENT, VOLS 1-3

SE International Conference on Service Systems and Service Management

LA English

DT Proceedings Paper

CT 4th International Conference on Service Systems and Service Management

CY JUN 09-11, 2007

CL Chengdu, PEOPLES R CHINA

SP IEEE Syst Man & Cybernet Soc, Tsinghua Univ, Res Ctr Contemporary Management

DE BEE service market; financing environment; concept model; dynamic actor network analysis

AB With more attentions to environment and energy, building energy efficiency (BEE) becomes the consequential selection to protect global environment and realize sustainable development. BEE service is the important part of BEE market and it can directly affect the healthy development of total market. Nowadays, the market is in the initial stages and capital is scare. The research is little and centralized on qualitative analysis and index appraisalment. Therefore, this study mainly analyzes financing environment for BEE service market adopting the research method combining with qualitative and quantitative analysis, identify the main influence factors for BEE service market through questionnaires, make concept

model for participants of BEE service market by strategic thought and dynamic actor network analysis (DANA) software platform. Construct the relevant relationships between different agents based on attribute and behavior. Finally, improve the analysis model on financing model for BEE service market and explore the effective ways to improve financing environment. The research result proves that government promulgating economic incentive policy, establishing building energy efficient supervision management system, improving building energy efficient service content and strengthening knowledge diffusion mode can promote BEE service market development.

C1 [Sun, Jinying; Xi, Bao] Harbin Inst Technol, Sch Management, Harbin 150001, Peoples R China.

[Liu, Changbin] Beijing Inst Architecture & Engr, Sch Econ & Management Engr, Beijing 100044, Peoples R China.

[Xiao, Gang] Accenture Consultant Co, Beijing 100020, Peoples R China.

RP Sun, JY (reprint author), Harbin Inst Technol, Sch Management, Harbin 150001, Peoples R China.

EM jinyingsun@hit.edu.cn; Changbin\_liu@163.com; xib@hit.edu.cn;

x\_gang@163.com

FU National Development and Reform Commission; United Nations Development Programme; Global Energy Fund [EUEEP-B2.5-20060915]

FX This work is supported by National Development and Reform Commission, United Nations Development Programme, Global Energy Fund, Grant No.EUEEP-B2.5-20060915.

CR BOTS P, 2003, DYNAMIC ACTOR NETWORK

EPSTEIN MJ, 1996, MEASURING CORPORATE, P32

\*FOR INV ADV SERV, 2007, FIN PRIV SECT DEV

JI FR, 2005, J SHANDONG NORMAL U, V21, P68

JIANGYI, 2006, CONSTRUCTION SCI JUL, P10

JIN JY, 2005, J S W JIAOTONG U, V4, P379

LEE BW, 1994, BUSINESS STRATEGY EN, P1

SHRIVASTAVA P, 1995, ACAD MANAGE REV, V20, P936, DOI 10.2307/258961

[??? SONG Guijie], 2006, [?????. ????, Journal of Yangzhou University. Natural Science Edition], V9, P69

[??? Wang Hongqiang], 2005, [?????. ????, Journal of Tongji University], V33, P422

ZHOU SJ, 2003, OPTIMIZATION CAPITAL, V24, P13

NR 11

TC 0

Z9 0

U1 0

U2 8

PU IEEE

PI NEW YORK

PA 345 E 47TH ST, NEW YORK, NY 10017 USA

SN 2161-1890

BN 978-1-4244-0884-9

J9 I C SERV SYST SERV M

PY 2007

BP 1175

EP +

PG 2

WC Business; Computer Science, Interdisciplinary Applications; Economics; Engineering, Industrial; Management; Operations Research & Management Science

SC Business & Economics; Computer Science; Engineering; Operations Research & Management Science

GA BGX76

UT WOS:000251162500220

DA 2018-05-03

ER

PT B

AU Zhang, XW

Chen, J

- Tian, H  
 AF Zhang, Xuewen  
 Chen, Jin  
 Tian, Hua  
 BE Chen, J  
 Xu, QR  
 Wu, XB
- TI Endogenous innovation strategy: Matching product architecture and organizational capability - Use information household appliance enterprises in japan as case
- SO ISMOT'07: PROCEEDINGS OF THE FIFTH INTERNATIONAL SYMPOSIUM ON MANAGEMENT OF TECHNOLOGY, VOLS 1 AND 2: MANAGING TOTAL INNOVATION AND OPEN INNOVATION IN THE 21ST CENTURY
- LA English  
 DT Proceedings Paper  
 CT 5th International Symposium on Management of Technology  
 CY JUN 01-03, 2007  
 CL Hangzhou, PEOPLES R CHINA  
 SP Res Ctr Innovat & Dev, Natl Innovat Management, Zhejiang Univ, NSFC, State Minist Educ, Sci & Technol  
 Dept Zhejiang Prov, TRIUMF, Haier Grp, CIMC, Baoshan Steel Corp, China Potevio Corp  
 DE endogenous innovation strategy; product architecture; organization capability; modularization product; integrity product
- AB In the era of knowledge-based economy, innovation has become a key factor for enterprise to gain international competitiveness. In this paper, we made an in-depth empirical study which based on the Japanese information household appliance enterprises, and analyzed the success and failure of how their information household appliance products could obtain an international competitiveness. Study found that Japanese information household appliance enterprises in the raw material areas of the upstream of industry and the components areas of the middle-stream of industry have greater national competitiveness, but have lower competitiveness in the final products areas of the downstream of industry. It is apparent that the Japanese information household appliance enterprises have strong capacity in running the holistic products. However the power of assembling the module products is very weak, as we studied, which is the typical dual-pattern of the Japanese enterprises. From the paradigm of matching product architecture and organizational capability, we divided product architecture into two categories, that is, the modularization product and the integrity product. Then, we classified the modularization product into the stable-type product and the variable-type product. In addition, we indicated that different types of product architecture need enterprise to build suitable organization capability, whether the product architecture matches the organizational capability or not plays the crucial endogenous role for innovation. Finally, the strategic model of matching product architecture and organizational capability has been made in detail.
- C1 Zhejiang Univ, Rcstep, Zhengzhou, Peoples R China.  
 RP Zhang, XW (reprint author), Zhejiang Univ, Rcstep, Zhengzhou, Peoples R China.  
 EM zhxwen\_68@sohu.com; cjhd@cma.zju.edu.cn; tianhua77@zju.edu.cn
- CR Baldwin C. Y., 2000, POWER MODULARITY, V1  
 BALDWIN CY, 1997, MANAGING AGE MODULAR, V3  
 CAMUFFO A, 2001, GLOBALIZATION OUTSOU  
 CLARK B, 1989, MANAGEMENT SCI  
 Clark K. B., 1991, PRODUCT DEV PERFORMA  
 FUJIMOTO, 2006, 06J040 RETI  
 FUJIMOTO T, 1998, DYNAMIC ASPECT PRODU  
 KENTARO N, 2005, 06J017 RETI  
 KENTARO N, 2004, 04J039 RETI  
 KENTARO N, 2005, 05J004 RETI  
 KENTARO N, 2006, 06J017 RETI  
 LANGLOIS RN, 2000, J EC BEHAV ORG  
 Ulrich K., 1995, RES POLICY  
 YANG LK, 2003, ASME SED ENG TECHN C
- NR 14  
 TC 0

Z9 0  
 U1 0  
 U2 1  
 PU ZHEJIANG UNIV PRESS  
 PI HANGZHOU  
 PA YUGU ROAD 20,, HANGZHOU, ZHEJIANG 310027, PEOPLES R CHINA  
 BN 978-7-89490-375-4  
 PY 2007  
 BP 202  
 EP 206  
 PG 5  
 WC Management; Operations Research & Management Science  
 SC Business & Economics; Operations Research & Management Science  
 GA BGL01  
 UT WOS:000248091800041  
 DA 2018-05-03  
 ER

PT B  
 AU Vivoda, E  
     Kurek, J  
 AF Vivoda, Eduard  
     Kurek, Juraj  
 BE Frankovic, B  
 TI Directive 2002/91/EC EU about energy performance of buildings -  
     Possibilities and effects of use in Croatia  
 SO ENERGY AND THE ENVIRONMENT 2006, VOL I  
 LA English  
 DT Proceedings Paper  
 CT 20th International Congress on Energy and the Environment  
 CY OCT 25-27, 2006  
 CL Opatija, CROATIA  
 DE energy performances of buildings; energy certificates; rational energy  
     consumption; energy services; energy certificates forum; energy  
     efficiency standard kWh/m(2)/a  
 AB In order to gain insight into the relationship between Directive 2002/91/EC of the EU about energy  
     performances of buildings, Directive 2006/32/EG of the European Parliament for efficient use of energy and  
     the Technical regulation of the Republic of Croatia about rational use of heat energy in the buildings,  
     these acts are briefly presented in the paper. Emphasis is on the role of energy certificates in  
     accomplishment of goals and application in the Republic of Croatia. Possibilities of rational use of electrical  
     energy are shown on particular objects: on the model of a hotel 85,71 kWh/m(2) year on 54,64  
     kWh/m(2)/year, and on the family house 220 kWh/m(2)/year at unshaded construction up to 50  
     kWh/m(2)/year, where new technologies are used in construction, as well as in the use of energy.

C1 [Vivoda, Eduard; Kurek, Juraj] Elteh Doo Rijeka, Rijeka, Croatia.  
 RP Vivoda, E (reprint author), Elteh Doo Rijeka, Rijeka, Croatia.  
 EM e.vivoda@elteh-rijeka.hr  
 CR \*EIHP, EU DIR EN KAR ZGRAD  
     HUTTLER W, EU RICHTLINIE GESAMT  
     \*MOZOPUG RH, 2005, TECHN PROP REP HRAV  
     \*OSW, WOSAN REFERENZPROJEK  
     VIVODA E, 2006, PRIMJENA PLINA DIR E, P297  
     2003, EU GEBAUDERICHTLINIE

NR 6  
 TC 0  
 Z9 0  
 U1 0  
 U2 0  
 PU HRVATSKO UDRUZENJE SUNCEVU ENERGIJU RIJEKA-CROATION SOLAR ENERGY ASSOC

PI HRVATSKA  
PA VUKOVARSKA 58, HRVATSKA, 00000, CROATIA  
BN 978-953-6886-09-8  
PY 2006  
BP 153  
EP +  
PG 2  
WC Energy & Fuels; Engineering, Environmental; Environmental Sciences  
SC Energy & Fuels; Engineering; Environmental Sciences & Ecology  
GA BGN89  
UT WOS:000248878300013  
DA 2018-05-03  
ER

PT B  
AU Jin, YL  
Ma, X  
Wei, HZ  
Liu, F  
Chen, XN  
Lan, YJ  
Tang, N  
Zhou, Z  
Yuan, P  
Cheng, YB  
Kai, S  
Baris, E  
Ezzati, M

AF Jin, YL  
Ma, X  
Wei, HZ  
Liu, F  
Chen, XN  
Lan, YJ  
Tang, N  
Zhou, Z  
Yuan, P  
Cheng, YB  
Kai, S  
Baris, E  
Ezzati, M

BE Yang, X  
Zhao, B  
Zhao, R

TI Knowledge of hazards from indoor air pollution from household energy use  
in rural China

SO INDOOR AIR 2005: PROCEEDINGS OF THE 10TH INTERNATIONAL CONFERENCE ON  
INDOOR AIR QUALITY AND CLIMATE, VOLS 1-5

LA English

DT Proceedings Paper

CT 10th International Conference on Indoor Air Quality and Climate (Indoor  
Air 2005)

CY SEP 04-09, 2005

CL Beijing, PEOPLES R CHINA

SP Tsinghua Univ, Minist Educ China, Natl Nat Sci Fdn China, Beijing Municipal Commiss Sci & Technol,  
Shanghai Municipal Commiss Sci & Technol, US EPA, Amer Ind Hyg Assoc, Amer Soc Heating,  
Refrigerating & Air Conditioning Engineers, Int Commiss Occupat Hlth, SC Indoor Air Qual & Hlth, Int

Council Res & Innovat Bldg & Construct, European Commiss Asia Pro Eco Programme Promot Sustainable Solut Environm Europe & Asia, Korean Soc Indoor Environm, Soc Indoor Environm DE household energy; indoor air pollution; technology diffusion; knowledge

AB Indoor air pollution from household use of biomass and coal is a leading environmental health risk in many developing nations, and directly or indirectly linked to a number of the Millennium Development Goals, such as environmental sustainability, reducing child mortality, and gender equity. We use data from four poor provinces in China (Gansu, Guizhou, Shaanxi, and Neimeng) to assess the knowledge of hazards associated with indoor air pollution. Using this detailed comparative study in these four Chinese provinces, we conclude that broad health education - which simply provides information on the hazards of risk and available interventions - is insufficient for successful risk mitigation. Rather, there should be emphasis on the economic and infrastructure needs of technology dissemination, coupled with understanding the details of behaviors that affect exposure and presenting users with alternative behaviors.

C1 China Ctr Dis Control & Prevent, Inst Environm Hlth & Related Prod Safety, Beijing, Peoples R China.  
 RP Ezzati, M (reprint author), China Ctr Dis Control & Prevent, Inst Environm Hlth & Related Prod Safety, Beijing, Peoples R China.  
 EM mezzati@hsph.harvard.edu

CR Ezzati M, 2004, ANNU REV ENV RESOUR, V29, P383, DOI 10.1146/annurev.energy.29.062103.121246  
 Florig HK, 1997, ENVIRON SCI TECHNOL, V31, pA274, DOI 10.1021/es972315t  
 Sinton J. E., 2004, ENERGY SUSTAIN DEV, V8, P33, DOI DOI 10.1016/S0973-0826(08)60465-2  
 SMITH KR, 1993, WORLD DEV, V21, P941, DOI 10.1016/0305-750X(93)90053-C  
 Smith KR, 2004, COMP QUANTIFICATION, V2, P1435  
 Warwick H, 2004, SMOKE KILLER KITCHEN

NR 6  
 TC 0  
 Z9 0  
 U1 2  
 U2 5  
 PU TSINGHUA UNIVERSITY PRESS  
 PI BEIJING  
 PA TSINGHUA UNIVERSITY HAIDIANQU, BEIJING 100084, PEOPLES R CHINA  
 BN 978-7-89494-830-4  
 PY 2005  
 BP 3681  
 EP 3684  
 PG 4  
 WC Construction & Building Technology; Engineering, Environmental; Public, Environmental & Occupational Health  
 SC Construction & Building Technology; Engineering; Public, Environmental & Occupational Health  
 GA BDJ55  
 UT WOS:000233831206032  
 DA 2018-05-03  
 ER  
 FN Clarivate Analytics Web of Science  
 VR 1.0  
 PT B  
 AU Zhang, GD  
 Liu, CB  
 AF Zhang, GD  
 Liu, CB  
 BE Wang, Y  
 TI Analysis of present status of development of building energy efficiency in China  
 SO PROCEEDINGS OF 2005 INTERNATIONAL CONFERENCE ON CONSTRUCTION & REAL ESTATE MANAGEMENT, VOLS 1 AND 2: CHALLENGE OF INNOVATION IN CONSTRUCTION AND REAL ESTATE  
 LA English

DT Proceedings Paper

CT International Conference on Construction and Real Estate Management

CY DEC 12-13, 2005

CL Penang, MALAYSIA

SP Harbin Inst Technol, Univ Sains Malaysia, Hong Kong Polytech Univ, Natl Univ Singapore, Purdue Univ, Univ Salford, Int Council Res & Innovat Bldg & Construct, Malaysian Airline Syst

DE building energy efficiency (BEE); present status analysis; problems and measures

AB The present status of development of building energy efficiency (BEE) in China has been introduced in this paper, and the necessity of implementing the strategy of sustainable development and constructing the energy-efficient-and-land-saving buildings is proposed. By analyzing the present status, the main problems are raised out, including: (1) lack of corresponding stimulating policies and administrative regulations and rules; (2) slow development of BEE market, and incomplete system of energy efficiency technologies; (3) scarcity of special channels for financing; and (4) poverty of consciousness about BEE, etc. Aiming at the above-mentioned problems, with the reference to advanced concepts and experiences from developed countries, it is emphasized on promoting the development of BEE in China through integrating the market adjustment system, government control system and social adaptation system. The detailed measures include: to improve policies, rules and regulations; to realize financing for BEE by market; to cultivate the BEE industry, to develop BEE technologies, and to establish the BEE certificating and labeling system; and to strengthen dissemination, education. and training of BEE.

C1 Harbin Inst Technol, Sch Management, Harbin, Peoples R China.

Beijing Inst Civil Engr & Architecture, Management Engrn Dept, Beijing, Peoples R China.

EM zhangguodong@hit.edu.cn; changbin\_liu@yahoo.com.cn

CR JIANG Y., 2005, J HV AC, V35-5, P30

LANG SW, 2001, J BUILDING SCI, V17, P1

LONG WD, 2004, J HV AC, V34, P5

YANG XW, 2003, J CONSTRUCTION SCI T, P8

NR 4

TC 0

Z9 0

U1 0

U2 0

PU CHINA ARCHITECTURE & BUILDING PRESS

PI BEIJING

PA BAIWANZHANG XICHENGGU, BEIJING, 10037, PEOPLES R CHINA

BN 7-112-07871-7

PY 2005

BP 1441

EP 1443

PG 3

WC Computer Science, Information Systems; Construction & Building Technology; Management

SC Computer Science; Construction & Building Technology; Business & Economics

GA BDN53

UT WOS:000234475300348

DA 2018-05-03

ER

PT B

AU Aizawa, M

Asaoka, K

Usami, C

Shimizutani, T

Yanagibashi, Y

Takahashi, S

Mano, T

AF Aizawa, M

Asaoka, K  
 Usami, C  
 Shimizutani, T  
 Yanagibashi, Y  
 Takahashi, S  
 Mano, T

GP IEEE

TI Quantitative environmental evaluation of Japanese electrical home appliances using eco-efficiency potential assessment method

SO 2003 3RD INTERNATIONAL SYMPOSIUM ON ENVIRONMENTALLY CONSCIOUS DESIGN AND INVERSE MANUFACTURING - ECODESIGN '03

LA English

DT Proceedings Paper

CT 3rd International Symposium on Environmentally Conscious Design and Inverse Manufacturing (EcoDesign 03)

CY DEC 08-11, 2003

CL Tokyo, JAPAN

SP IEEE, Assoc EcoDesign Soc Japan

AB E2-PA (Eco-Efficiency Potential Assessment) quantitatively evaluates eco-efficiency by evaluating the environmental performance as the potential environmental impacts of the product. Proposed by Professor Katsuya Nagata of Waseda University, E2-PA was co-developed by Professor Nagata and Environmental Management for Sustainability, Inc.(EMSI) at the Inverse Manufacturing Forum (sponsored by Manufacturing Science and Technology Center).

E2-PA can be used to evaluate products, set-vices and society. Material Intensity, Energy Intensity, Hazardous Material Intensity, Recovery Intensity, and Duration Intensity are the factors that are taken into account within the evaluation using E2-PA. In addition, computer software is currently under development, commissioned by Japan Small and Medium Enterprise Corporation.

In this research, E2-PA was used to quantitatively evaluate the environmental-consciousness of plastic bottles and electrical home appliances. The reduction of environmental load was compared between the appliances and then their environmental-consciousness improvements were evaluated.

CR DeSimone L.D., 1997, ECOEFFICIENCY BUSINE

\*MAN SCI TECHN CTR, 2002, FY 2001 REP STUD RES

NAGATA K, 1998, MAT INVERSE MANUFACT

NAGATA K, 2002, P C 2002 JAP SOC MEC

NAGATA K, 2002, P 10 C JAP I EN

NAGATA K, 2002, P 2002 C JAP SOC WAS

\*PLAST WAST MAN I, 1995, LIF CYCL CONS MUN PL

\*PLAST WAST MAN I, 1995, ASS ENV IMP PACK MAT

NR 8

TC 0

Z9 0

U1 0

U2 1

PU IEEE

PI NEW YORK

PA 345 E 47TH ST, NEW YORK, NY 10017 USA

BN 0-7803-8590-X

PY 2003

BP 741

EP 746

DI 10.1109/VETECF.2003.240469

PG 6

WC Engineering, Environmental; Engineering, Industrial; Engineering, Manufacturing

SC Engineering

GA BAJ29

UT WOS:000222499500137

DA 2018-05-03



ER

PT B

AU Kristl, Z

Zbasnik-Senegacnik, M

AF Kristl, Ziva

Zbasnik-Senegacnik, Martina

BE Frankovic, B

TI Architectural and energy saving refurbishment of buildings

SO Energy and the Environment 2002, Vol I

LA English

DT Proceedings Paper

CT 18th International Congress on Energy and the Environment

CY OCT 23-25, 2002

CL Opatija, CROATIA

SP Univ Rijeka Fac Engr, Croatian Solar Energy Assoc Rijeka, Univ Ljubljana, Fac Mech Engr, UN Econ  
Commiss Europe, Energy Inst

DE energy retrofitting of buildings

AB In the paper an energy-retrofitting study of an existing building in Ljubljana is presented, which was carried out during a research project of rehabilitation of large neighbourhoods in Slovenia that were constructed in the period between 1945 and 1965. In the first phase of the project, the state-of-the-art was established via a poll carried out among the residents of several neighbourhoods and via expert inspection. In the second phase, a method was applied to an existing neighbourhood in Ljubljana. According to the technology of that period, the buildings were made of brick walls, mont panels, fibre-cement roofing and box windows all of which does not comply with the present quality of living or technical standards. The energy refurbishment project comprises use of better thermal insulation and low-E windows, glazing of balconies and active solar systems. The case study shows that energy consumption can be lowered by more than 60%, compared to the present state, not taking into account electricity savings. The project presents a model for future energy revitalizations of multi-storey residential buildings. A similar method can be applied to holiday apartment buildings and small hotels from the same period, which need to be renovated.

C1 Univ Ljubljana, Fac Civil & Geodet Engr, Chair Buildings & Construct Complexes, Ljubljana 1000, Slovenia.

RP Kristl, Z (reprint author), Univ Ljubljana, Fac Civil & Geodet Engr, Chair Buildings & Construct Complexes, Jamova Cesta 2, POB 3422, Ljubljana 1000, Slovenia.

CR KOVIC S, 1990, MODEL ENERGY RETROFU

KRAINER A, 1991, DINAMIC THERMAL RESP

KRISTL Z, 1996, P 13 INT PLEA C ARCH, P407

KRISTL Z, 2000, SOL ENERGY, V70, P23

MARTINA ZS, 1996, NEGATIVNI VPLIVI GRA

SOLAR CONTROL INTEGR

NR 6

TC 0

Z9 0

U1 0

U2 4

PU HRVATSKO UDRUZENJE SUNCEVU ENERGIJU RIJEKA-CROATION SOLAR ENERGY ASSOC

PI HRVATSKA

PA VUKOVARSKA 58, HRVATSKA, 00000, CROATIA

BN 978-953-6886-03-6

PY 2002

BP 281

EP 289

PG 9

WC Energy &amp; Fuels; Engineering, Environmental; Environmental Sciences

SC Energy &amp; Fuels; Engineering; Environmental Sciences &amp; Ecology

GA BGO10

UT WOS:000248909800031

DA 2018-05-03  
ER

PT B

AU Lollini, R  
Meroni, I  
De Salvia, A

AF Lollini, R  
Meroni, I  
De Salvia, A

BE Ural, O  
Abrantes, V  
Tadeu, A

TI Assessment of performances of envelope and plant components able to improve energy efficiency of the building-plant system

SO XXX IAHS WORLD CONGRESS ON HOUSING, HOUSING CONSTRUCTION: AN INTERDISCIPLINARY TASK, VOLS 1-3

LA English

DT Proceedings Paper

CT 30th IAHS World Congress on Housing

CY SEP 09-13, 2002

CL UNIV COIMBRA, COIMBRA, PORTUGAL

SP Int Assoc Housing Sci

HO UNIV COIMBRA

DE energy performance; degree-day; experimental building

AB The paper describes tools and techniques mainly based on the full-scale testing facilities available at ITC, which make up the assessment methodologies of envelope and plant components. In fact, experimental buildings have been arranged and used to assess the energy performances of HVAC plants and their components and innovative dynamic envelope systems which allow to heat and cool the indoor environment in a sustainable way, also using solar energy. Some case studies are presented, together with relative data analysis methods. The common study methods used to carry out the experimental campaigns consist in analysing the response of the devices under test to the endogenous and exogenous load in a real working condition. The energy saving was assessed also by developing original data analysis, such as degree-day analysis and others, conceived to evaluate the building energy performance based on the availability of short period data.

The results of the experimentation were the assessment of the energy behaviour of several heating plant configurations (boiler with small or big technologic contents, cast iron radiator compared with radiant panel, high or low flow temperature that means high or low energy), obtaining in some cases, in spite of a sophisticated plant, but much oversized, a higher energy consumption and ambient discomfort compared with a cheaper one. Again novel boiler control systems have been tested, whose development was promoted by the EU, reaching energy saving from about 10% if compared with the control systems at present available on the market. Finally, tests were performed on several envelope systems whose energy contribution allows integrating traditional plants with a beneficial effect on the indoor comfort.

C1 CNR, ITC, I-20098 S Giuliano Mil, MI, Italy.

RP Lollini, R (reprint author), CNR, ITC, Via Lombardia 49, I-20098 S Giuliano Mil, MI, Italy.

CR Brunello P., 1997, CDA, V2, P129

\*EN EFF OFF, 1993, FUEL EFF BOOKL

LOLLINI R, 2001, P CLIMA 2000 NAPOLI

MERONI I, 2001, P ENERGIE SOLAIRE BA

SAPORITO A, 2000, OVERVIEW WEATHER NOR

NR 5

TC 0

Z9 0

U1 0

U2 0

PU WIDE DREAMS PROJECTOS MULTIMEDIA LDA

PI COIMBRA

PA AV DR ELISIO DE MOURA, 417-1 G, COIMBRA 3030-183, PORTUGAL

BN 972-9027-31-5

PY 2002

BP 1455

EP 1462

PG 8

WC Architecture; Construction & Building Technology; Engineering, Civil;  
Environmental Studies; Urban Studies

SC Architecture; Construction & Building Technology; Engineering;  
Environmental Sciences & Ecology; Urban Studies

GA BV58K

UT WOS:000179444800175

DA 2018-05-03

ER

PT B

AU Faberi, S

Mebane, W

Presutto, M

AF Faberi, S

Mebane, W

Presutto, M

BE Bertoldi, P

Ricci, A

DeAlmeida, A

TI High efficiency household appliances and low income families in Italy

SO ENERGY EFFICIENCY IN HOUSEHOLD APPLIANCES AND LIGHTING

LA English

DT Proceedings Paper

CT 2nd International Conference on Energy Efficiency in Household

Appliances and Lighting

CY SEP 27-29, 2000

CL NAPLES, ITALY

SP SAVE II Programme, ANPA, ADEME, ASSIL, ASSOLUCE, CECED, ENEA, ENEL, Federelettrica,  
Napoletanagas, Saes Getters

AB With increasing globalisation of the economy, income distribution and consumer preferences are changing. This may impact upon the possibility for low-income families to purchase and utilise energy efficient home appliances.

The aim of the study is to assess the present degree of difficulty that low income families in Italy have in purchasing high efficiency refrigerator/freezers and clothes washers.

Results show that, given their substantially lower level of expenditure for household appliances, the higher prices of energy efficient models represent an obstacle for these families in Italy to overcome energy inefficiency and energy poverty. an important input to energy policy. Over two million 600 thousand families, 11.9 percent of the total families in 1999 are estimated to be below the poverty threshold based upon consumption. An independent survey shows that these families possess less technologically advanced models, keeping them for a much longer period of 36 years, more than double the recommended lifetime of 15 years, and four times the national average of nine years. This technical disadvantage is aggravated by the additional operating costs of the more inefficient models. The higher prices of the more efficient models make it difficult for the poor families to afford them. Even at the annualised price of the average refrigerator - belonging to the energy efficiency C class - the annual expenditure of the poor families in Italy is less than half that necessary to purchase this model, consistent with the longer turnover rates. According to latest statistics in 1999, the B model is priced 70% above the C model in Italy, making it very difficult for poor families to purchase the more efficient models. Extrapolating the relative consumption data to other European countries and comparing it to local prices indicates that the situation may be similar in other EU Member States.

The implications for energy and social policy are clear: without some form of public incentive it is unlikely that poor families in Italy will purchase the energy efficient models, remaining in an energy poverty trap for many years to come.

CR \*3A EUROSTAT ECHP, 1999, SEL IND 1995 WAV

\*ADEME, 1999, MON EN EFF TRENDS EU  
 \*ANIE, 1997, IND IT APP DOM NEL  
 \*ANIE ENEA, 1994, MON EL APPL CONS HAB  
 \*ENEA, 1998, STUD FATT COST FOND  
 \*EUROSTAT EUR COMM, 1994, 1 WAV  
 \*I POL ZECC STAT, 1997, POV IT 1980 1995  
 \*IFR, 1999, APP EL, V11  
 \*ISTAT, 1997, CONS FAM

NR 9

TC 0

Z9 0

U1 0

U2 0

PU SPRINGER-VERLAG BERLIN

PI BERLIN

PA HEIDELBERGER PLATZ 3, D-14197 BERLIN, GERMANY

BN 3-540-41482-7

PY 2001

BP 529

EP 540

PG 12

WC Business; Energy &amp; Fuels; Engineering, Electrical &amp; Electronic

SC Business &amp; Economics; Energy &amp; Fuels; Engineering

GA BR77Z

UT WOS:000167495500056

DA 2018-05-03

ER

PT J

AU Radford, J

Addison, MS

Smith, T

AF Radford, J

Addison, MS

Smith, T

TI Energy-efficient design of large office buildings

SO ENERGY ENGINEERING

LA English

DT Article

AB This article describes the implementation of a new method of designing state buildings in the state of Louisiana to cut energy consumption in several large state office buildings, as well as provide a demonstration of energy efficient design of large office buildings which will be accessible to the public. Included in this article are discussions of the proposed energy conservation measures and the determination of their energy and cost savings. It is apparent from the analysis that the initial costs associated with the installation of the energy conservation measures are far outweighed by the benefits gained over the life of the measures.

Some of the cases presented are standard practice construction items currently used in Louisiana, and some are innovative technologies. They are simulated using new state-of-the-art building energy simulation software and compared to the ASHRAE 90.1-1989 base case, which Louisiana has adopted as a minimum standard for all new commercial construction in the state. These buildings are expected to demonstrate the effectiveness of the energy saving measures and will hopefully change the way future buildings for the state of Louisiana are designed.

C1 Arizona State Univ, Bldg Energy Simulat Lab, Tempe, AZ 85287 USA.

NR 0

TC 0

Z9 0

U1 1

U2 3

PU ENERGY ENGINEERING  
 PI LILBURN  
 PA 700 INDIAN TRAIL, LILBURN, GA 30047 USA  
 SN 0199-8595  
 J9 ENERGENG  
 JI Energy Eng.  
 PY 2001  
 VL 98  
 IS 1  
 BP 61  
 EP +  
 PG 17  
 WC Energy & Fuels  
 SC Energy & Fuels  
 GA 379MX  
 UT WOS:000165647600005  
 DA 2018-05-03  
 ER

PT B  
 AU Uitdenbogerd, ID  
 AF Uitdenbogerd, ID  
 BE Williams, DJ  
     Durie, B  
     McMullan, P  
     Paulson, C  
     Smith, A  
 TI Demand side acceptance of energy reduction options - A household  
     perspective on behavioural change  
 SO GREENHOUSE GAS CONTROL TECHNOLOGIES  
 LA English  
 DT Proceedings Paper  
 CT 5th International Conference on Greenhouse Gas Control Technologies  
 CY 2000  
 CL CAIRNS, AUSTRALIA  
 SP Int Energy Agcy, Australian Consortium, BHP, BP Amoco, CRIRO, Australian Greenhouse Off, Rio Tinto,  
     Res Inst Innovat Technol Earth, Black Coal Utilisat Cooperat Res Ctr, Asea Brown Boveri, NOVEM  
 C1 Wageningen Univ, Wageningen, Netherlands.  
 RP Uitdenbogerd, ID (reprint author), Wageningen Univ, Wageningen, Netherlands.  
 CR BROUWER NM, 1998, 9801 H C WAG U HOUS  
     \*CBS, 1994, NAT BUDG RES 1990  
     KRAMER KJ, 1998, 9801 IVEM  
     RAZENBERG BJ, 2000, THESIS U UTRECHT NET  
     UITDENBOGERD DE, 1998, 2 H C WAG U HOUS CON  
     UITDENBOGERD DE, 1995, ECN195010  
 NR 6  
 TC 0  
 Z9 0  
 U1 0  
 U2 0  
 PU C S I R O  
 PI EAST MELBOURNE  
 PA PO BOX 89 (EAST ALBERT ST), EAST MELBOURNE, 3002, AUSTRALIA  
 BN 0-643-06672-1  
 PY 2001  
 BP 1203  
 EP 1208  
 PG 6

WC Engineering, Environmental; Environmental Sciences  
 SC Engineering; Environmental Sciences & Ecology  
 GA BX21Q  
 UT WOS:000184645800198  
 DA 2018-05-03  
 ER

PT B

AU Yang, L  
 Liu, JP  
 Wang, D  
 Zhao, Q  
 Wang, Y

AF Yang, L  
 Liu, JP  
 Wang, D  
 Zhao, Q  
 Wang, Y

GP CUHK  
 CUHK  
 CUHK

TI Improving residential building environment through the energy-efficient designs and sustainable technologies - On a case study of Chinese Yaodong Community

SO PROCEEDINGS OF THE 4TH INTERNATIONAL CONFERENCE ON INDOOR AIR QUALITY, VENTILATION AND ENERGY CONSERVATION IN BUILDINGS, VOLS I-III

LA English

DT Proceedings Paper

CT 4th International Conference on Indoor Air Quality, Ventilation and Energy Conservation in Buildings (IAQVEC 2001)

CY OCT 02-05, 2001

CL CHANGSHA, PEOPLES R CHINA

SP City Univ Hong Kong, Minist Educ, K C Wong Educ Fdn, Broad Air Conditioning Co Ltd, Int Energy Agcy, WHO, Int Council Building Res Stud & Documentat, Amer Soc Heating, Refrigerating & Air-Conditioning Engineers, Int Soc Indoor Air Quality & Climate, Air Infiltrat & Ventilat Ctr, Amer Ind Hygiene Assoc, Chartered Inst Building Serv Engineers, China Assoc Refrigerat, Comm Heating, Ventilat & Air Conditioning, Chinese Architecture Assoc, Hong Kong Inst Engineers, Natl Resource Canada, Building Grp, CANMET Energy Technol Ctr, Hunan Univ

AB This paper introduces the combination methods of energy-efficient design and sustainable technologies for improving living environment of Chinese Folk Dwellings, Yaodong Dwelling Community. A demonstration project having been built in Yan'an City will be used as an initial, sustainable, prototype in suburban regions in Northwestern China. The experimental research and objective sense investigation of occupants have been carries out to evaluate the design strategies. It is hope that this method will bring to a new sense and concept for the architectural design.

C1 Xian Univ Archtecture & Technol, Coll Architecture, Xian 710055, Shanxi, Peoples R China.

RP Yang, L (reprint author), Xian Univ Archtecture & Technol, Coll Architecture, Xian 710055, Shanxi, Peoples R China.

CR EDWARDS B, 1999, SUSTAINABLE ARCHITEC, P79

LI YZ, THERMAL DESIGN HDB P

QING W, 2000, THESIS XIAN U ARCHIT

WANG D, 2000, YAODONG CAVE DWELLIN

YANG L, 1999, 4 UND SPAC C

[Anonymous], CHINA STAT YB

NR 6

TC 0

Z9 0

U1 1

U2 3

PU CITY UNIVERSITY HONG KONG  
PI KOWLOON  
PA TAT CHEE AV, KOWLOON, HONG KONG, PEOPLES R CHINA  
BN 962-442-190-0  
PY 2001  
BP 1901  
EP 1908  
PG 8  
WC Construction & Building Technology; Engineering, Environmental  
SC Construction & Building Technology; Engineering  
GA BV29H  
UT WOS:000178473300240  
DA 2018-05-03  
ER

PT B  
AU Radford, J  
Addison, MS  
Smith, T  
AF Radford, J  
Addison, MS  
Smith, T  
BE Sioros, D  
TI Energy efficient design of large office buildings  
SO BUILDING FOR THE 21ST CENTURY: ENERGY & THE ENVIRONMENT  
LA English  
DT Proceedings Paper  
CT 22nd World Energy Engineering Congress  
CY OCT 20-22, 1999  
CL ATLANTA, GA

SP Geothermal Heat Pump Consortium, Int Ground Source Heat Pump Assoc, Alliance Save Energy, Natl Assoc State Energy Officials, US Dept Commerce, US DOE, Fed Energy Management Programs, US Gen Serv Adm,, US EPA Reg IV Headquarters, Natl Fire Protect Assoc, Natl Roofing Contractors Assoc, Power Mkt Assoc, Amer Soc Ind Secur, Natl Assoc Energy Serv Co

AB This paper describes the implementation of a new method of designing state buildings in the state of Louisiana, designed to cut energy consumption in several large state office buildings, as well as provide a demonstration of energy efficient design of large office buildings, which will be accessible to the public. Included in this paper are discussions of the proposed energy conservation measures and the determination of their energy and cost savings. It is apparent from the analysis that the initial costs associated with the installation of the energy conservation measures are far outweighed by the benefits gained over the life of the measures. Some of the cases presented are standard practice construction items currently used in Louisiana, and some are innovative technologies. They are simulated using new state-of-the-art building energy simulation software, and compared to the ASHRAE 90.1-1989 base case, which Louisiana has adopted as a minimum standard for all new commercial construction in the state. These buildings are expected to demonstrate the effectiveness of the energy saving measures, and will hopefully change the way future buildings for the state of Louisiana are designed.

NR 0  
TC 0  
Z9 0  
U1 0  
U2 0  
PU FAIRMONT PRESS INC  
PI LILBURN  
PA 700 INDIAN TRAIL, LILBURN, GA 30047 USA  
BN 0-88173-338-5  
PY 2000  
BP 125

EP 130

PG 6

WC Construction & Building Technology; Energy & Fuels; Engineering,  
Electrical & Electronic; Environmental Sciences

SC Construction & Building Technology; Energy & Fuels; Engineering;  
Environmental Sciences & Ecology

GA BS02W

UT WOS:000168377200020

DA 2018-05-03

ER

PT B

AU Saur, K

Meyer, A

Hesselbach, J

AF Saur, K

Meyer, A

Hesselbach, J

BE Mostagaci, H

TI Towards eco-efficient ways of household heating - System comparison of  
gas, oil and solar based systems

SO ENVIRONMENT CONSCIOUS MATERIALS - ECOMATERIALS

LA English

DT Proceedings Paper

CT International Symposium on Ecomaterials held in conjunction with the  
39th Annual Conference of Metallurgists of CIM

CY AUG 20-23, 2000

CL OTTAWA, CANADA

SP Met Soc CIM, Mat Sci & Engn Sect

AB Key drivers in our global economy are mainly cost. The growing importance of environmental themes does not change this view. Today very often economic performance and environmental friendliness are considered to be non-compatible.

The reasoning for this is mainly, that environmental protection is seen defensive and end-of-pipe oriented. If an organizations emphasis is only legal compliance, such arguments are especially true. Here filters, sewage plants and waste management are real cost drivers. In order to overcome this non-beneficial situation, new approaches are inevitable. Offensive approaches are required to meet both, economic and environmental targets.

LCA has in the past only been used to assess a systems environmental system performances. Therefore many information were collected and assessed, but only from an environmental standpoint. However, this time and cost intensive data collection has also significantly contributed to a arguments against the use of LCA.

The authors propose a different solution. The high quality LCA data on substance and energy flow, could easily be used to better describe to cost drivers within the manufacturing operations. Very often, these data are not available (therefore LCA's are so expensive!) and not available for cost accounting. A proper data collection and analysis could substantially improve the cost-relevant data processing.

On this basis, improvements can not only be achieved form the environmental perspective. Major improvements can be found on the economic side, too. The systematic analysis of processes gives access to activity based costing approaches.

The aim of this paper is to show cases for the private household heating systems, where such methods have been used beneficially. Systems like natural gas, fuel oil, solar, and combinations thereof have been examined und studied and assessed. The optimization of the system requires the more holistic perspective.

C1 PE Prod Engn GmbH, D-73265 Dettingen Unter Teck, Germany.

RP Saur, K (reprint author), PE Prod Engn GmbH, Kirchheimerstr 76, D-73265 Dettingen Unter Teck,  
Germany.

CR EYERER P, 1999, LIFE CYCLE ENG REAL

ISO, 1997, 14040 ISO

\*U STUTTG IKP PE P, 1998, GABI3 SOFTW SYST LIF

NR 3



TC 0

Z9 0

U1 0

U2 0

PU CANADIAN INST MINING, METALLURGY AND PETROLEUM

PI MONTREAL

PA XEROX TOWER, 1 PLACE ALEXIS NIHON, 1210-3400 DE MAISONNEUVE BLVD,

MONTREAL, PQ H3Z 3B8, CANADA

BN 1-894475-04-6

PY 2000

BP 149

EP 157

PG 9

WC Environmental Sciences; Materials Science, Multidisciplinary

SC Environmental Sciences &amp; Ecology; Materials Science

GA BU81N

UT WOS:000177116800013

DA 2018-05-03

ER

PT B

AU Kau, SW

Cho, MY

AF Kau, SW

Cho, MY

GP ICEMI

ICEMI

ICEMI

TI Energy saving in office buildings using neural network technology

SO ICEMI'99: FOURTH INTERNATIONAL CONFERENCE ON ELECTRONIC MEASUREMENT &  
INSTRUMENTS, VOLS 1 AND 2, CONFERENCE PROCEEDINGS

LA English

DT Proceedings Paper

CT 4th International Conference on Electronic Measurement and Instruments

CY AUG 18-21, 1999

CL HARBIN, PEOPLES R CHINA

SP Chinese Inst Electr, IEEE Beijing Sect, Chinese Instrumentat Soc, Natl Nat Sci Fdn China, KC Wong Educ  
Fdn, Hong Kong, Harbin Inst Technol, CIE, Electr Measurement & Instrumentat Soc

ID SYSTEMS

AB This papers describes an energy-saving Study in office buildings using neural network technology. In order to control its temperature, several actuators and sensors were installed and connected to data acquisition and control system based on PC 586. Several experiments showed the various effects of different methods. Feedback signals such as room temperatures, room occupation and its duration, status of air condition system are converted to digital code. The software development is based on visual C++ with support from Matlab, and its fuzzy toolbox. various Feedback.

C1 Natl Kaohsiung Inst Technol, Dept Elect Engr, Kaohsiung, Taiwan.

RP Kau, SW (reprint author), Natl Kaohsiung Inst Technol, Dept Elect Engr, Kaohsiung, Taiwan.

CR BARGIOTAS D, 1988, IEEE T POWER DELIVER, V3, P2119, DOI 10.1109/61.194024

DUHAMEL P, 1979, IEEE T CIRCUITS SYST, V26, P411, DOI 10.1109/TCS.1979.1084676

KHALID, 1992, IEEE CONTROL SYSTEM, V12, P58

Khalid M., 1992, IEEE Control Systems Magazine, V12, P58, DOI 10.1109/37.165518

ONO T, 1987, IEEE T IND ELECTRON, V34, P285, DOI 10.1109/TIE.1987.350967

NR 5

TC 0

Z9 0

U1 0

U2 0

PU CHINESE INSTITUTE ELECTRONICS

PI HARBIN

PA HARBIN INSTITUTE TECHNOLOGY NO. 92, WEST DA-ZHI STREET, HEILONGJIANG,

HARBIN 150001, PEOPLES R CHINA

PY 1999

BP 968

EP 973

PG 6

WC Engineering, Electrical & Electronic; Instruments & Instrumentation

SC Engineering; Instruments & Instrumentation

GA BP39F

UT WOS:000084980200206

DA 2018-05-03

ER

PT B

AU Zoechling, J

Haas, R

Schipper, L

AF Zoechling, J

Haas, R

Schipper, L

GP IAEE

IAEE

TI Understanding the development of energy consumption in the residential sector linking econometric and bottom up approaches

SO NEW EQUILIBRIA IN THE ENERGY MARKETS: THE ROLE OF NEW REGIONS AND AREAS - VOL 2, CONFERENCE PROCEEDINGS

LA English

DT Proceedings Paper

CT Conference of the International-Association-for-Energy-Economics (IAEE)

CY JUN 09-12, 1999

CL ROME, ITALY

SP Int Assoc Energy Econ, ACEA SpA, ASSOMINERARIA, BG Italy, EDISON, EDS, ENEL SpA, ERG

Petroleum Italia SpA, EXXON Co, Inst Francais Petrole, Price Waterhouse Coopers, Kuwait Petroleum

Italia SpA, Shell Italia SpA, Tamoil Italia SpA, UNAPACE

ID DEMAND

AB Along with industry, transport, and services, residences are one of the major energy consuming sectors in all OECD countries. In no other sector did such dramatic changes in the energy consumption patterns and the fuel mix take place, which was mainly influenced by two important and opposing trends. A huge growth in household income led to a huge increase of energy service. This expansion of energy services per se would have multiplied energy consumption in all countries, but instead actual final household consumption rose by 25% to 75% (except Japan) and even fell in Denmark from 1970 to 1995. Some of this development occurs, because more efficient heating systems, appliances, better thermal quality and saturation effects. In the case of CO<sub>2</sub> emissions the fuel switching effect in addition helped to stabilize emissions. This paper studies these developments of total residential energy- and electricity demand in five selected OECD countries (Austria, Denmark, Japan, Western Germany and the US)(2) After an introductory chapter an extensive econometric analysis with special focus on non-linear income aspects is done, since the augmentation of the standard dynamic demand equations with non-linear (quadratic terms as a proxy) terms of income leads to better model characteristics. The major conclusion of this investigation is that the theory of constant income elasticities has to be rejected. Income, one of the major driver of residential energy- and electricity demand has become less important with regard to energy (but NOT to service) demand in comparison with the 1970s and 1980s because of efficiency improvements and some saturation effects.

CR DARGAY JM, 1992, PRICE INCOME ELASTIC

Galli R, 1998, ENERGY J, V19, P85

Gately D., 1992, ENERGY J, V13, P179, DOI 10.5547/ISSN0195-6574-EJ-V0113-N04-10

GATELY D, 1993, ENERGY J, V14, P163

Haas R, 1998, ENER POLICY, V26, P1031, DOI 10.1016/S0301-4215(98)00057-3

Haas R., 1998, OPEC REVIEW, V22, P113  
 PROSSER RD, 1985, ENERG ECON, V7, P9, DOI 10.1016/0140-9883(85)90033-7  
 SCHLEICHER SP, 1995, GLOBAL WARMING ENERG  
 Walker I.O., 1993, ENERGY J, V14, P183  
 WIRL F, 1991, RESOUR ENERG, V13, P241, DOI 10.1016/0165-0572(91)90008-Q

NR 10

TC 0

Z9 0

U1 0

U2 1

PU INTERNATIONAL ASSOCIATION FOR ENERGY ECONOMICS

PI CLEVELAND

PA 28790 CHAGRIN BLVD, SUITE 210, CLEVELAND, OH 44122 USA

PY 1999

BP 285

EP 294

PG 10

WC Economics; Environmental Studies

SC Business & Economics; Environmental Sciences & Ecology

GA BQ25J

UT WOS:000087729700031

DA 2018-05-03

ER

PT B

AU Albieri, L

AF Albieri, L

BE Butera, F

Grassi, A

Helm, P

Landabaso, A

Zervos, A

TI Rehabilitation with a bio-ecological approach: Less energy consumption  
 and healthy buildings - A training experience

SO REBUILD - THE EUROPEAN CITIES OF TOMORROW: SHAPING OUR EUROPEAN CITIES  
 FOR THE 21ST CENTURY

LA English

DT Proceedings Paper

CT 2nd European Conference on Shaping our European Cities for the 21st  
 Century

CY APR 01-03, 1998

CL FLORENCE, ITALY

SP Commiss European Communities

AB In Italy, over 200,000 dwellings are re-structured every year. Rehabilitation according to bio-building criteria provides a better guarantee of duration and therefore greater financial advantages in time. Often indeed, rather than eliminating the causes of deterioration, new and synthetic components and materials worsen these problems.

In "bio-ecological architecture", houses are defined as a "third skin" for man, that is to say they must allow an exchange with the outside air and allow cosmic radiation to pass through the walls, This exchange is essential for the health of human beings. Indeed, man spends about three quarters of his time, on the average, in enclosed environments.

The: air inside buildings is often worse than that outside, the so-called sick building syndrome. Pollution due to electromagnetic fields is aggravated by the presence of considerable quantities of metal in the load-bearing structures. Historical buildings and those erected using traditional technologies are healthier and more comfortable. This is the philosophy underlying the training course for "Bio-building technical experts" in accordance with with a definition of health provided by the World Health Organisation: "Health is a state of profound well-being of the body, of the: psyche and of social life".

C1 Scuola Edile Genovese, I-16135 Genoa, Italy.

RP Albieri, L (reprint author), Scuola Edile Genovese, Via Borzoli 61 A-B, I-16135 Genoa, Italy.

NR 0

TC 0

Z9 0

U1 1

U2 2

PU ETA-FLORENCE

PI FLORENCE

PA PIAZZA SAVONAROLA 10, I-50132 FLORENCE, ITALY

PY 1998

BP 86

EP 89

PG 4

WC Construction & Building Technology; Energy & Fuels; Engineering, Civil

SC Construction & Building Technology; Energy & Fuels; Engineering

GA BL78A

UT WOS:000076709300024

DA 2018-05-03

ER

PT B

AU Brohard, GJ

Elberling, LE

Hernandez, GR

AF Brohard, GJ

Elberling, LE

Hernandez, GR

BE Ricketts, J

TI Lessons learned in whole-building integrated energy efficiency

SO ENERGY & ENVIRONMENTAL VISIONS FOR THE NEW MILLENNIUM

LA English

DT Proceedings Paper

CT 20th World Energy Engineering Congress (WEEC)

CY NOV 19-21, 1997

CL ATLANTA, GA

SP Natl Assoc State Energy Officials, US Dept Commerce, US DOE, Off Natl Programs, US Gen Serv Adm, Natl Assoc Energy Serv Co, Power Marketing Assoc, Atlanta Gas Light Co, Gas Res Inst, Amer Gas Cooling Ctr, Ind Ctr Inc

AB In 1990, Pacific Gas & Electric Company initiated a Research & Development project entitled the Advanced Customer Technology Test for Maximum Energy Efficiency (ACT(2)) to determine the maximum energy savings achievable in a customers' facility, at or below utility supply cost, using integrated packages of state-of-the-art energy efficient measures. The theory is that much more energy can be saved through the synergistic interaction of individual energy efficient measures, packaged expressly for that purpose, than would be realized if the measures were implemented individually. For example, a superior building shell and/or glazing will decrease the required size of an air conditioning system such that a smaller, more efficient system can be installed for the same or lower cost than the larger less efficient system. By combining the two energy efficient measures (glazing and a new A/C system), the resulting energy consumption is less than it would be if the measures were evaluated and implemented separately. Nine facilities were ultimately investigated as part of the project, both new construction and retrofit, residential and commercial, with one rear of pre-retrofit (retrofit sites) energy monitoring, implementation of the energy efficient measures and one year of post retrofit energy monitoring. Data collection was completed by the end of 1996. The evaluations of the sites were completed in early 1997. Energy savings ranged from 40% to 50% of baseline energy consumption for the retrofit projects to 70% of the projected energy consumption for the new construction sites had they been built to satisfy California's Title 24 energy standards. Although the pending electric industry deregulation has watered down the economic assumptions used, many valuable lessons were learned in the areas of implemented technologies, building and construction industry barriers and energy efficient measure installation techniques as well. This paper

discusses some of the major lessons learned in the hope that these barriers and deficiencies can be overcome to create ultra-efficient buildings in the future.

NR 0

TC 0

Z9 0

U1 0

U2 2

PU FAIRMONT PRESS INC

PI LILBURN

PA 700 INDIAN TRAIL, LILBURN, GA 30047 USA

BN 0-88173-289-3

PY 1998

BP 83

EP 90

PG 8

WC Energy & Fuels; Environmental Sciences

SC Energy & Fuels; Environmental Sciences & Ecology

GA BR93V

UT WOS:000168119300011

DA 2018-05-03

ER

PT B

AU Matsukawa, I

Asano, H

Kakimoto, H

AF Matsukawa, I

Asano, H

Kakimoto, H

GP IAEE

IAEE

TI Use of information technology in residential time-of-day electricity pricing: Customer response to electricity-use monitors in a Japanese experiment

SO TECHNOLOGY'S CRITICAL ROLE IN ENERGY & ENVIRONMENTAL MARKETS, CONFERENCE PROCEEDINGS

LA English

DT Proceedings Paper

CT 19th Annual North American IAEE/USAEE Conference on Technology Critical Role in Energy and Environmental Markets

CY OCT 18-21, 1998

CL ALBUQUERQUE, NM

SP Int Assoc Energy Econ, US Assoc Energy Econ, Aramco Serv Co, Atlantic Richfield Co, Conoco Inc, EDS, Elect Power Res Inst, Exxon Corp, Petr Econ Ltd, PNM Gas Serv, Sandia Natl Labs, TransCanada Pipelines Ltd

AB We attempted to measure the effects of information on residential time-of-day (TOD) electricity demand in summer, using data from a residential TOD electricity pricing experiment in Kyushu. During the experiment, only TOD groups were offered information on their load profiles and monthly electricity usage. electricity use monitor at home. TOD groups could also receive incentive payments if they reduce their peak usage share. The estimation results based on an econometric model indicate that both monitor-provided electricity information and incentive payment significantly affected time-of-day usage of electricity. Information provision to households was found to enhance load shifting from the peak to off-peak period. However it was also found to have an adverse impact on load shifting by reducing household response to incentive payment. The adverse impact increased along with incentive payments.

C1 Musashi Univ, Tokyo, Japan.

CR GOLDMAN C, 1996, 1996 ACEEE SUMM STUD

MATSUKAWA I, 1997, 18 ANN N AM C USAEE

MATSUKAWA I, 1996, 17 ANN N AM C USAEE

Pollak R. A., 1992, DEMAND SYSTEM SPECIF  
 SEXTON RJ, 1989, LAND ECON, V65, P272, DOI 10.2307/3146671

NR 5

TC 0

Z9 0

U1 0

U2 0

PU INTERNATIONAL ASSOCIATION FOR ENERGY ECONOMICS

PI CLEVELAND

PA 28790 CHAGRIN BLVD, SUITE 210, CLEVELAND, OH 44122 USA

PY 1998

BP 9

EP 18

PG 10

WC Business; Economics; Environmental Studies

SC Business & Economics; Environmental Sciences & Ecology

GA BP27B

UT WOS:000084536600002

DA 2018-05-03

ER

PT B

AU D'Alessio, G

AF D'Alessio, G

BE Hickey, KL

Kantarelis, D

TI Increasing the diffusion of energy efficient housing vs. energy  
 inefficient housing: Finding early adopters among potential owners of  
 newly constructed houses

SO OUR NATURAL ENVIRONMENT: AT A CROSSROAD, PROCEEDINGS

LA English

DT Proceedings Paper

CT 3rd International Interdisciplinary Conference on the Environment

CY JUN 25-28, 1997

CL WORCESTER, MA

SP Interdisciplinary Environm Assoc

AB The aim of this research is to increase the diffusion of energy. efficient housing which, to date, has been a slow process.

The neighborhood effect of word of mouth does not greatly increase the diffusion of energy efficient housing as it is taking place. People moving into a new neighborhood often do not know the people there, nor do energy efficient houses look different than energy inefficient houses; therefore, energy. efficient houses. when they do not have exterior solar collectors, do not make good status symbols to relative strangers.

Small to moderate economic incentives aimed at getting people to buy energy efficient houses have not been extremely effective. Consumers of new houses are not extremely rational about the economics of owning energy efficient houses For several reasons. Heat loss is not readily apparent, so buying a house to avoid it is not a primary concern to most people. Furthermore, most home owners do not consider paying for heat to be difficult. Also most homeowners think their houses are more energy efficient than they actually are. A final negative perception many people have of energy efficient houses is that energy efficient houses have poor indoor air quality and will rot and deteriorate faster than non-energy efficient houses. These ideas are incorrect.

By currently sampling, with a written questionnaire, New England owner occupants of recently constructed energy efficient and energy. inefficient homes, characteristics unique to each group are being delineated. The resultant profile of an early adopter of an innovation who owns an energy efficient house could be used with a similar questionnaire, in the future, to find among people in the market for newly constructed houses, the early adopter type of potential homeowners. These early adopter type of potential homeowners could be contacted face to face by change agents - many of whom might be satisfied owners

of energy efficient homes who would promote energy efficient houses, and serve as surrogate consumers to help the homebuyers choose energy efficient products and services of quality.

CR ALLSTADT B, 1997, BUILD EN C MAR 15  
 Archer D, 1987, ENERGY EFFICIENCY PE, P69  
 Assael H., 1994, CONSUMER BEHAV MARKE  
 Bandura A., 1977, SOCIAL LEARNING THEO  
 Barnett H. G, 1953, INNOVATION BASIS CUL  
 BARTON DL, 1992, J CONSUM RES, V3, P243  
 \*CONS SERV GROUP A, 1995, MARK CHAR NEW ENGL R  
 DARLEY JM, 1981, J SOC ISSUES, V37, P150, DOI 10.1111/j.1540-4560.1981.tb02630.x  
 DEYOUNG R, 1993, ENVIRON BEHAV, V25, P485, DOI 10.1177/0013916593253003  
 DUPONT P, 1978, RESIDENTIAL INDOOR A  
 \*FAIR SHAR DEV, 1990, EN CRAFT HOM BUILD G  
 HARRINGTON BK, 1990, ENERGY SPECIALIST, V6, P10  
 Kotler P., 1989, SOCIAL MARKETING STR  
 National Research Council, 1985, EN EFF BUILD BEH ISS  
 NISSON JD, 1985, SUPERINSULATED HOME  
 NORUSIS MJ, 1995, SPSS SPSS 6 1 GUIDE  
 OSTLUND LE, 1974, J CONSUM RES, V1, P23, DOI 10.1086/208587  
 ROBERTSON S, 1971, INNOVATIVE BEHAV COM  
 Rogers E. M., 1983, DIFFUSION INNOVATION  
 Salant P., 1994, CONDUCT YOUR OWN SUR  
 SAVINAR JA, 1981, 8114051 DPGT U MICR  
 SHORETT JE, 1986, RESIDENTIAL ENERGY C  
 STERN PC, 1995, ENVIRON BEHAV, V27, P723, DOI 10.1177/0013916595276001  
 STERN PC, 1986, J POLICY ANAL MANAG, V5, P200, DOI 10.2307/3323541  
 \*STRAT U MARK SERV, 1995, NEW RES CONSTR BAS S  
 Tarde Gabriel, 1969, COMMUNICATION SOCIAL  
 \*US DEP COMM, 1996, STAT ABSTR US 1996  
 WILK RR, 1987, ENERGY EFFICIENCY PE, P51  
 YEARNIS MEH, 1984, HOME ENERGY AUDIT PR

NR 29  
 TC 0  
 Z9 0  
 U1 0  
 U2 2  
 PU INTERDISCIPLINARY ENVIRONMENT ASSOCIATION  
 PI WORCESTER  
 PA ASSUMPTION COLLEGE 500 SALISBURY ST PO BOX 15005, WORCESTER, MA  
 01615-0005 USA  
 BN 0-9654033-2-7  
 PY 1997  
 BP 56  
 EP 70  
 PG 5  
 WC Environmental Sciences  
 SC Environmental Sciences & Ecology  
 GA BN12G  
 UT WOS:000080781300006  
 DA 2018-05-03  
 ER

PT B  
 AU Strickland, RM  
 Dux, DL  
 AF Strickland, RM  
 Dux, DL  
 BE Zazueta, FS

MartinezAustria, P

Xin, JN

GarciaVillanueva, NH

TI Residential energy efficiency software

SO SIXTH INTERNATIONAL CONFERENCE ON COMPUTERS IN AGRICULTURE

LA English

DT Proceedings Paper

CT 6th International Conference on Computers in Agriculture

CY JUN, 1996

CL CANCUN, MEXICO

SP ASAE, Informat & Elect Technol Div, Univ Florida, Inst Food & Agr Sci, Inst Mexicano Tecnol Agua, Mexico

AB The Unites States has the highest per capita energy use in the world and this extremely large demand for energy results in numerous negative environmental impacts. Home energy use accounts for about 20 percent of the total energy used in the United States; Thus, this program is designed to educate the homeowner, renter, apartment dweller, and other interested parties on various ways to reduce energy consumption; while maintaining the same desired level of comfort in the home. in addition, the program addresses the monetary savings, pollution prevention benefits and the possible indoor air quality impacts of implementing certain energy efficient practices and technologies. The program was developed in conjunction with U.S. EPA, who provided much of che graphics and information contained in the program. The program uses the hypertext based Knowledge Pro for windows interface, so that both textual and high resolution graphics can be presented at the same time. The program is available from U.S. EPA, the Center for Technology Transfer and Pollution Prevention at Purdue University, and from several public domain bulletin boards.

RP Strickland, RM (reprint author), PURDUE UNIV,DEPT AGR & BIOL ENGN,W LAFAYETTE,IN 47907, USA.

NR 0

TC 0

Z9 0

U1 0

U2 0

PU AMER SOC AGRICULTURAL ENGINEERS

PI ST JOSEPH

PA 2950 NILES RD, ST JOSEPH, MI 49085-9659

BN 0-929355-74-1

PY 1996

BP 365

EP 371

PG 7

WC Agriculture, Dairy & Animal Science; Agronomy; Computer Science,

Interdisciplinary Applications

SC Agriculture; Computer Science

GA BJ03C

UT WOS:A1996BJ03C00050

DA 2018-05-03

ER

EF
